# Supplementary material
Source: PubMed Central journal article supplement (PMC7810477)
Supplement: jci-131-138519-s223.pdf [file jci-131-138519-s223.pdf]

**Supplementary Figure 1. Oleic acid does not affect T<sub>reg</sub> viability or proliferation.**

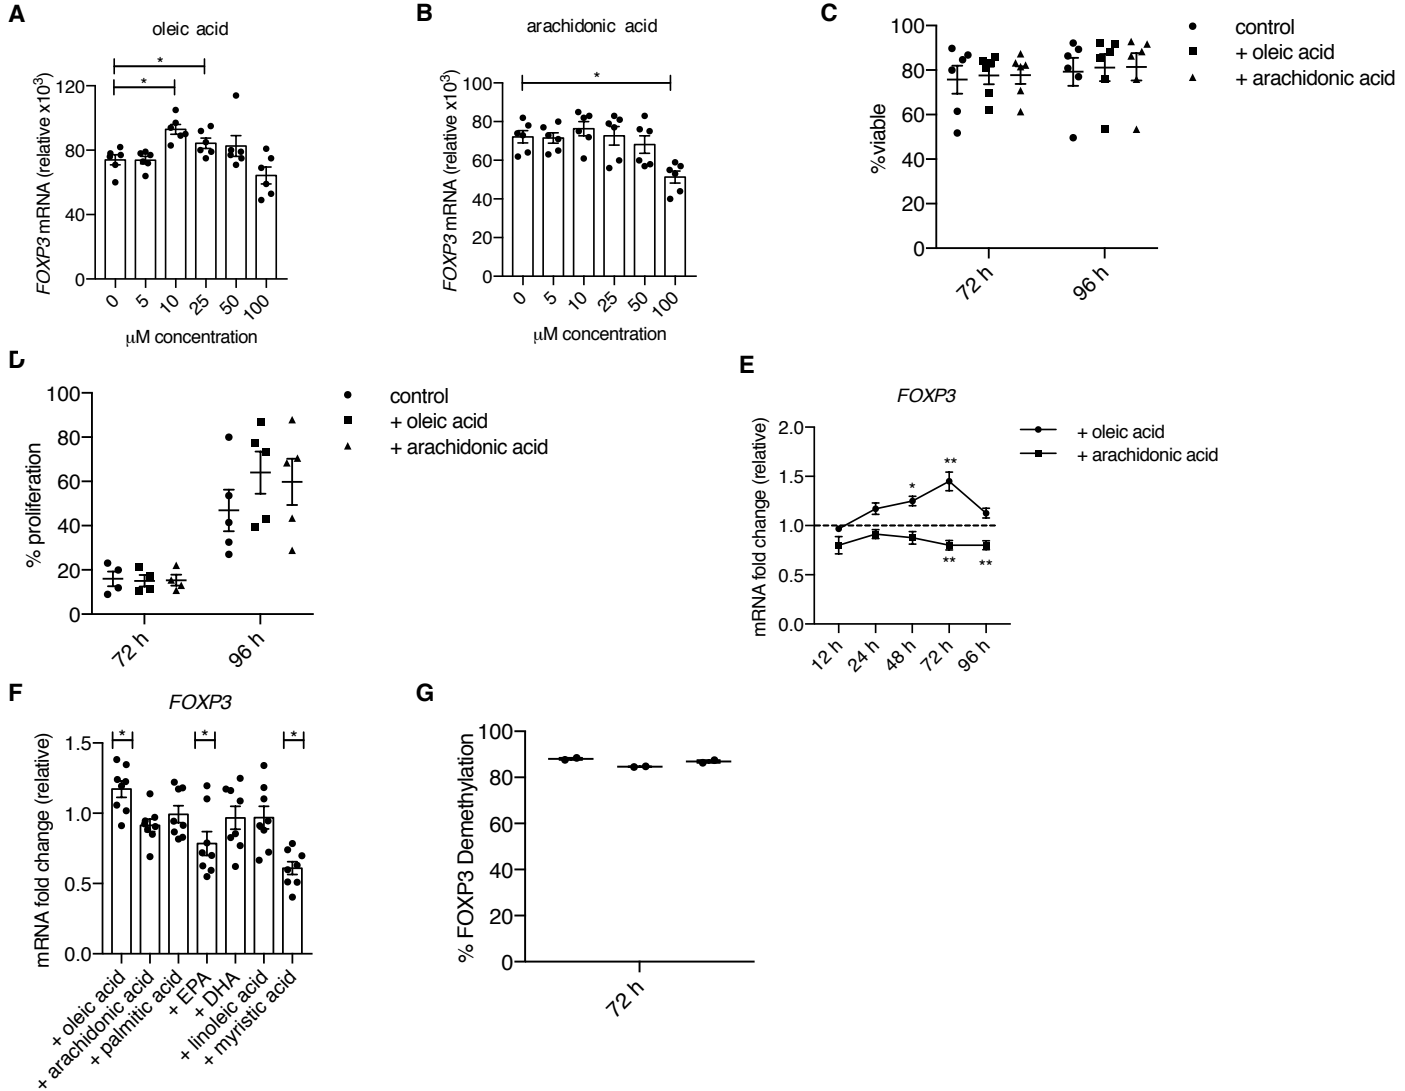

**Supplementary Figure 1. Oleic acid does not affect T<sub>reg</sub> viability or proliferation.** (A) T<sub>reg</sub>s stimulated in the presence of increasing concentrations of oleic acid. Paired t-test corrected for multiple hypothesis testing using the Holm-Sidak method; \*P < 0.05. (B) T<sub>reg</sub>s stimulated in the presence of increasing concentrations of arachidonic acid. Paired t-test corrected for multiple hypothesis testing using the Holm-Sidak method; \*P < 0.05. (C) Viability and (D) proliferation of T<sub>reg</sub>s stimulated in the presence or absence of 10  $\mu$ M oleic or arachidonic acid measured at 72 and 96 h. (E) Kinetics of FOXP3 expression in T<sub>reg</sub>s after treatment with 10  $\mu$ M of specified fatty acids relative to vehicle (n=8). Paired t-test corrected for multiple hypothesis testing using the Holm-Sidak method; \*P < 0.05; \*\*P < 0.01. (F) mRNA expression of FOXP3 in T<sub>reg</sub>s after treatment with 10  $\mu$ M oleic acid, arachidonic acid, palmitic acid, Eicosapentaenoic acid (EPA), Docosahexaenoic acid (DHA), linoleic acid, or myristic acid for 72 h. All LCFA treatment values are relative to vehicle-treated T<sub>reg</sub>s (n=8). Paired t-test corrected for multiple hypothesis testing using the Holm-Sidak method; \*P < 0.05. (G) T<sub>reg</sub>s stimulated in the presence or absence of 10  $\mu$ M oleic or arachidonic acid and analyzed for bisulfite modification and quantification of TSDR methylation by epigenetic human FOXP3 qPCR Assay (Epiontis) (n=6). Data represents mean  $\pm$  SEM.

**Supplementary Figure 2. Oleic acid increases mitochondrial mass in  $T_{regs}$ .**

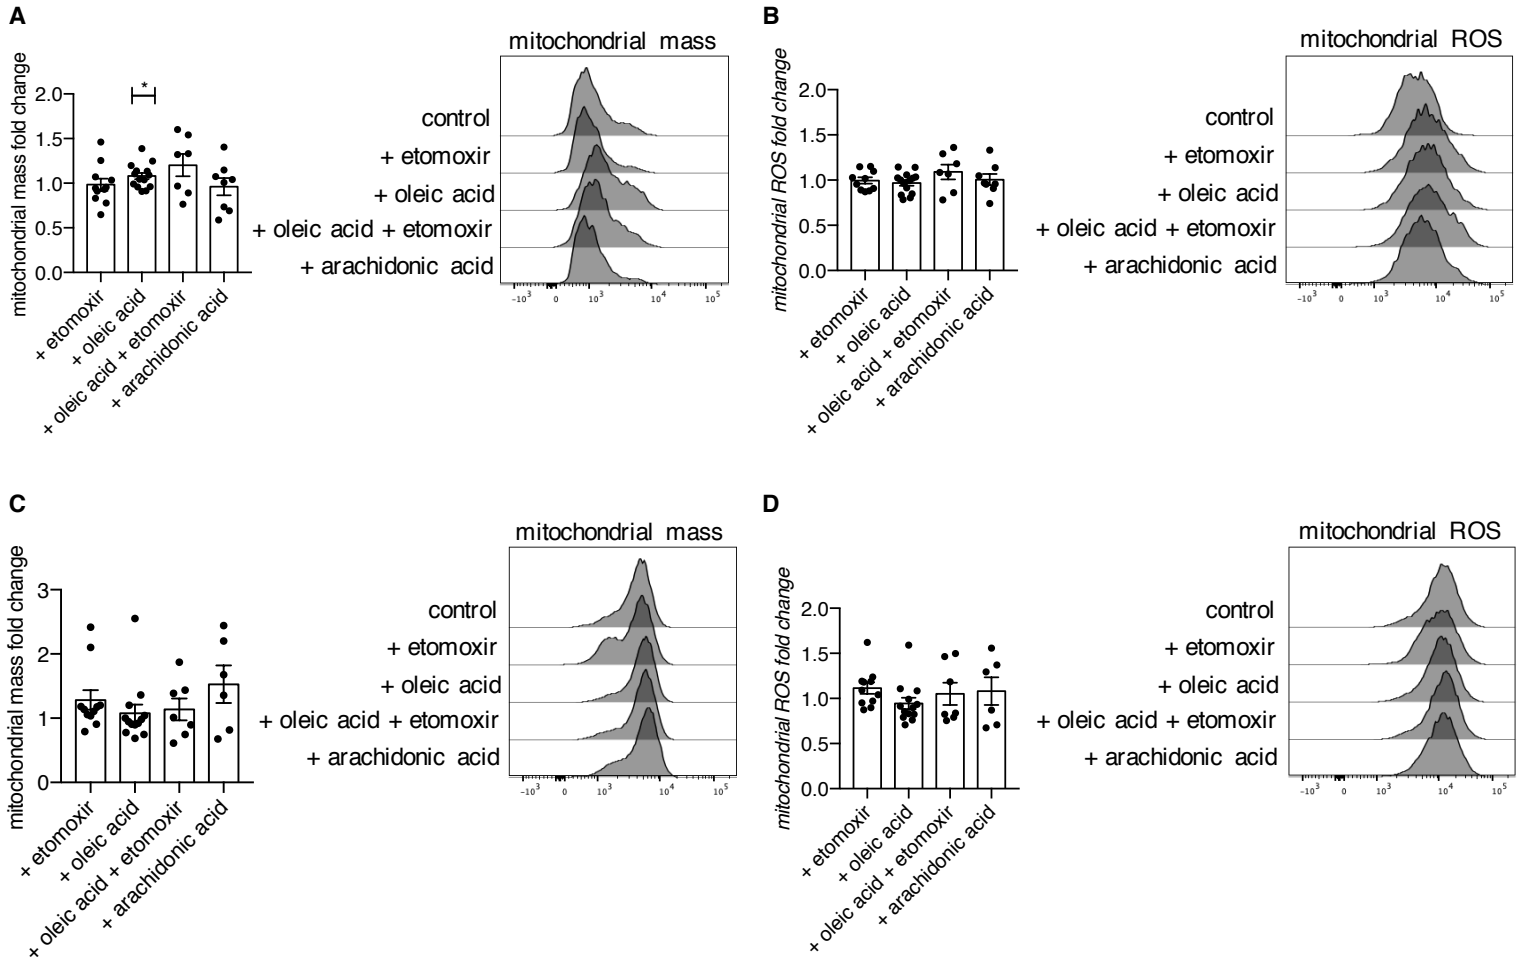

**Supplementary Figure 2. Oleic acid increases mitochondrial mass in  $T_{regs}$ .** (A) Mitochondrial mass and (B) reactive oxygen species (ROS) measured in  $T_{regs}$  stimulated in the presence or absence of etomoxir (50  $\mu$ M), oleic acid (10  $\mu$ M), oleic acid and etomoxir, or arachidonic acid (10  $\mu$ M) for 72 h. Left is summary data relative to control, and right is one representative histogram. Paired t-test corrected for multiple hypothesis testing using the Holm-Sidak method; \* $P < 0.05$ . (C) Mitochondrial mass and (D) ROS measured in  $T_{effs}$  stimulated in the presence or absence of etomoxir (50  $\mu$ M), oleic acid (10  $\mu$ M), oleic acid and etomoxir, or arachidonic acid (10  $\mu$ M) for 72 h. Left is summary data relative to control, and right is one representative histogram. Data represents mean  $\pm$  SEM.

**Supplementary Figure 3. Oleic acid does not affect mitochondrial respiration in T<sub>eff</sub> cells.**

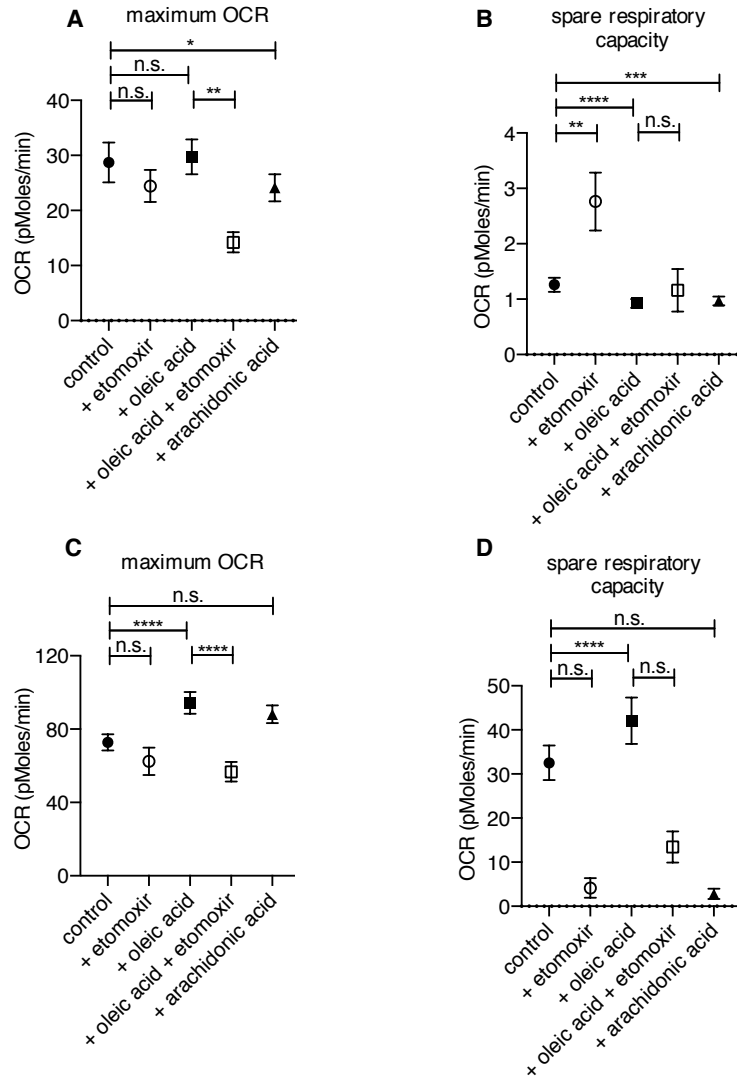

**Supplementary Figure 3. Oleic acid does not affect mitochondrial respiration in T<sub>eff</sub> cells.** (A) Maximum oxygen consumption rate (OCR) and (B) spare respiratory capacity of T<sub>regs</sub> stimulated in the presence or absence of etomoxir (50  $\mu$ M), oleic acid (10  $\mu$ M), oleic acid and etomoxir, or arachidonic acid (10  $\mu$ M) for 72 h. Graphs are a summary of n=12. Paired t-test corrected for multiple hypothesis testing using the Holm-Sidak method; \*P < 0.05; \*\*P < 0.01; \*\*\*P < 0.001; \*\*\*\* P < 0.0001; n.s. = not significant. (C) Maximum OCR and (D) spare respiratory capacity of T<sub>efs</sub> stimulated in the presence or absence of etomoxir (50  $\mu$ M), oleic acid (10  $\mu$ M), oleic acid and etomoxir, or arachidonic acid (10  $\mu$ M) for 72 h. Graphs are a summary of n=12. Paired t-test corrected for multiple hypothesis testing using the Holm-Sidak method; \*P < 0.05; \*\*P < 0.01; \*\*\*P < 0.001; \*\*\*\* P < 0.0001; n.s. = not significant. Data represents mean  $\pm$  SEM.

**Supplementary Figure 4. Both 5  $\mu$ M and 50  $\mu$ M of etomoxir show oleic acid-driven effects are dependent on CPT1.**

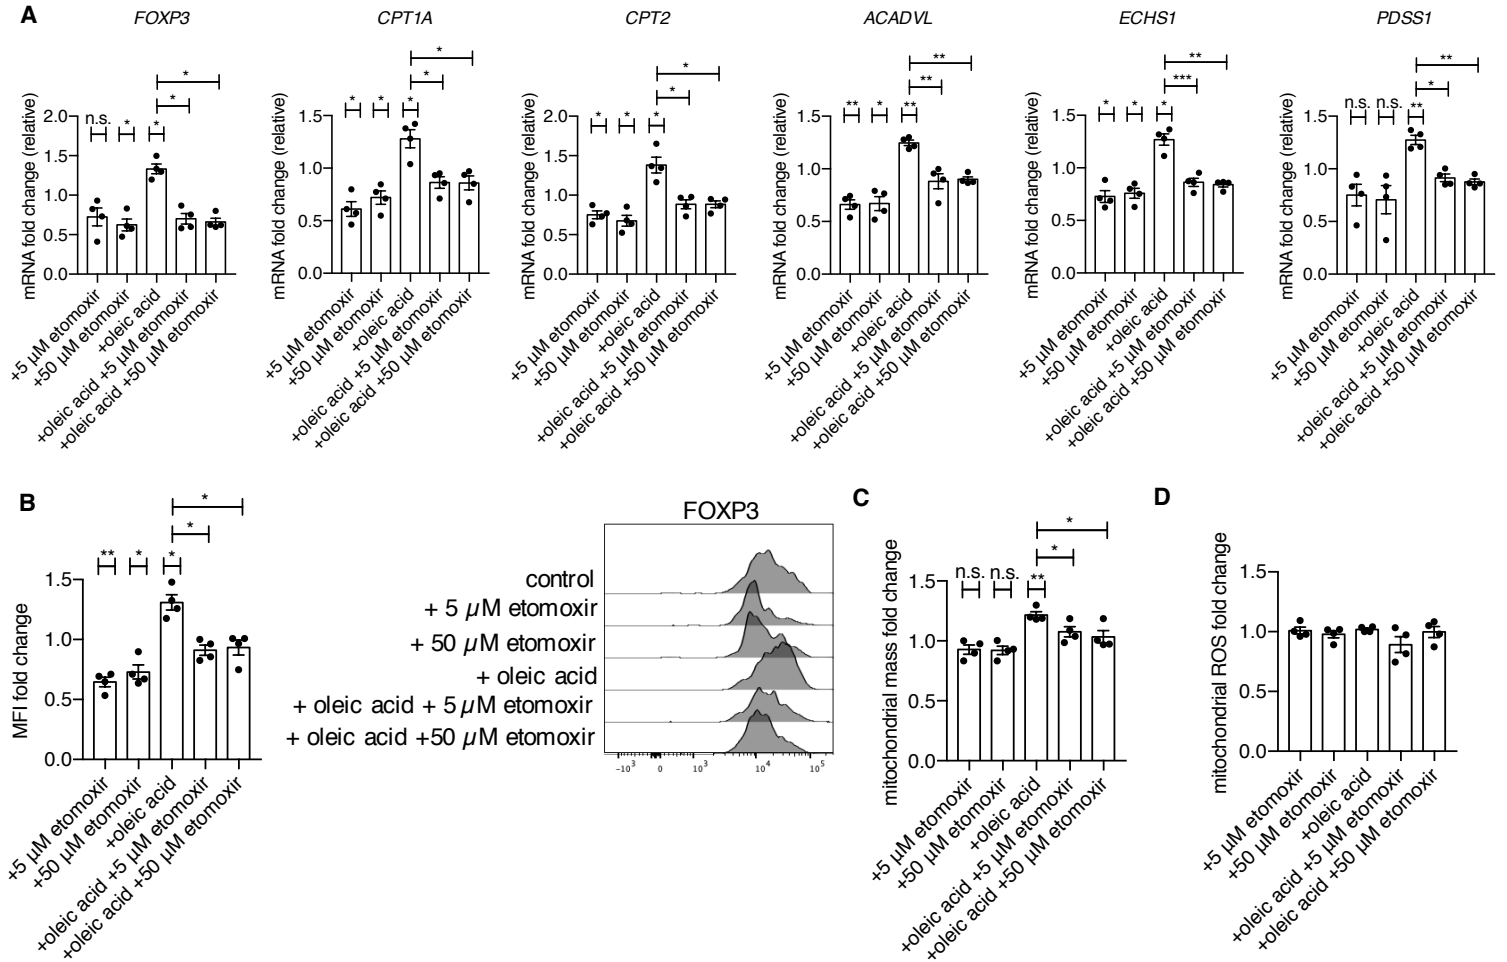

**Supplementary Figure 4. Both 5  $\mu$ M and 50  $\mu$ M of etomoxir show oleic acid-driven effects are dependent on CPT1.** (A) Fold change of mRNA expression relative to control, of indicated genes in  $T_{reg}$ s stimulated in the presence or absence of etomoxir (5 or 50  $\mu$ M), oleic acid (10  $\mu$ M), or oleic acid and etomoxir for 72 h. Paired t-test corrected for multiple hypothesis testing using the Holm-Sidak method; \* $P < 0.05$ ; \*\* $P < 0.01$ ; \*\*\* $P < 0.001$ ; n.s. = not significant. (B) Summary data (left) or one representative histogram (right), relative to control, of the expression of FOXP3 mean fluorescence intensity (MFI) in  $T_{reg}$  cells stimulated in the presence or absence of etomoxir (5 or 50  $\mu$ M), oleic acid (10  $\mu$ M), or oleic acid and etomoxir for 72 h. Paired t-test corrected for multiple hypothesis testing using the Holm-Sidak method; \* $P < 0.05$ ; \*\* $P < 0.01$ . Summary data relative to control, of (C) mitochondrial mass or (D) mitochondrial reactive oxygen species (ROS) in  $T_{reg}$  cells stimulated in the presence or absence of etomoxir (5 or 50  $\mu$ M), oleic acid (10  $\mu$ M), or oleic acid and etomoxir for 72 h. Paired t-test corrected for multiple hypothesis testing using the Holm-Sidak method; \* $P < 0.05$ ; \*\* $P < 0.01$ . Data represents mean  $\pm$  SEM.

**Supplementary Figure 5. Oleic acid-induced expression of fatty acid oxidation-related genes in T<sub>eff</sub> cells.**

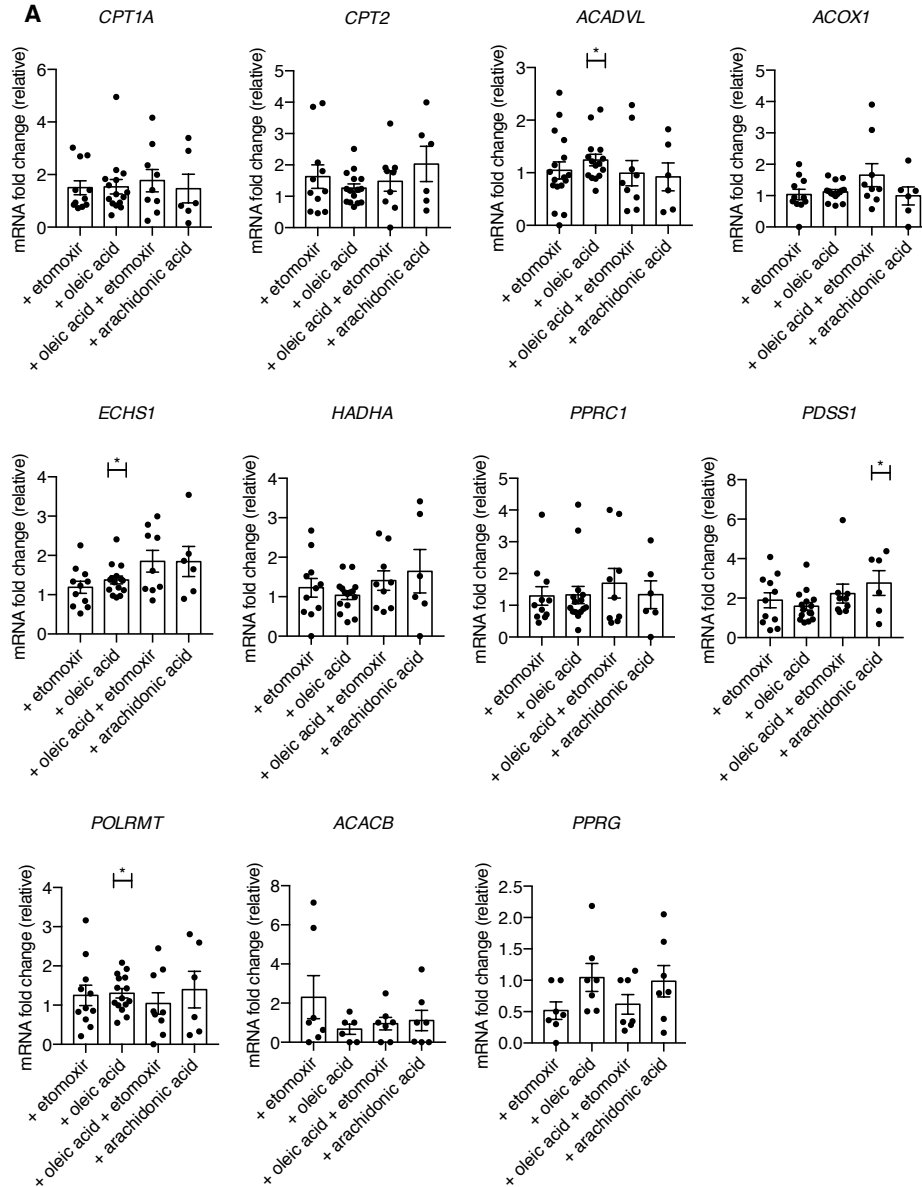

**Supplementary Figure 5. Oleic acid-induced expression of fatty acid oxidation-related genes in T<sub>eff</sub> cells. (A)** Fold change of mRNA expression relative to control, of indicated genes in T<sub>effs</sub> stimulated in the presence or absence of etomoxir (50  $\mu$ M), oleic acid (10  $\mu$ M), oleic acid and etomoxir, or arachidonic acid (10  $\mu$ M) for 72 h. Paired t-test corrected for multiple hypothesis testing using the Holm-Sidak method; \*P < 0.05. Data represents mean  $\pm$  SEM.

**Supplementary Figure 6. Oleic acid-induced expression of fatty acid oxidation-related genes in T<sub>reg</sub> cells.**

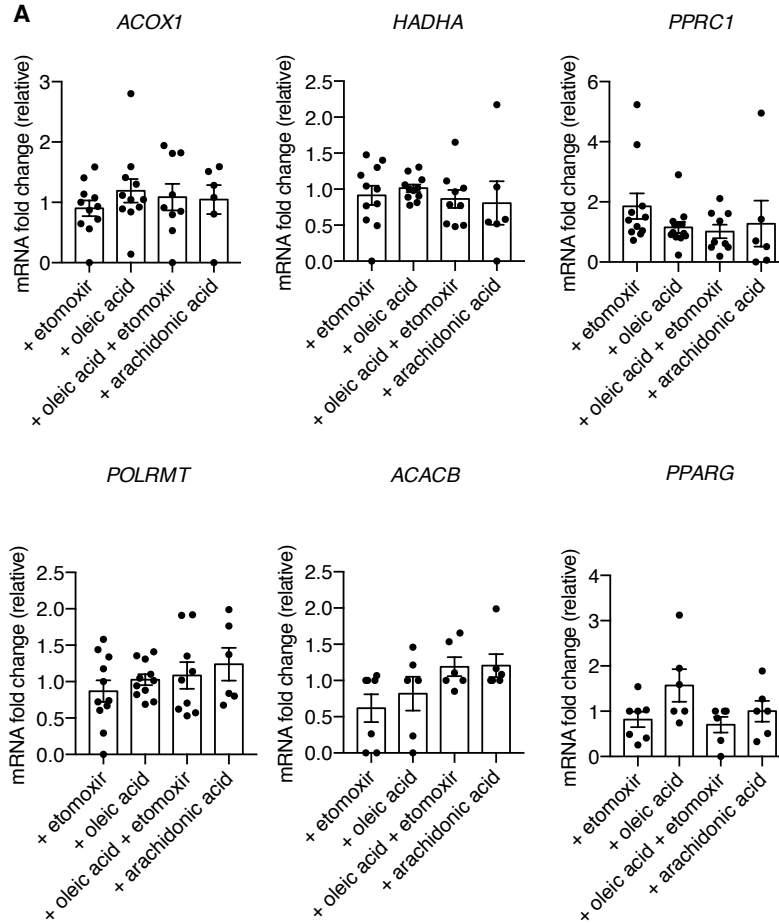

**Supplementary Figure 6. Oleic acid-induced expression of fatty acid oxidation-related genes in T<sub>reg</sub> cells. (A)** Fold change of mRNA expression relative to control, of indicated genes in T<sub>regs</sub> stimulated in the presence or absence of etomoxir (50  $\mu$ M), oleic acid (10  $\mu$ M), oleic acid and etomoxir, or arachidonic acid (10  $\mu$ M) for 72 h. Data represents mean  $\pm$  SEM.

**Supplementary Figure 7. PPAR transcription factors play a role in oleic acid-mediated increased T<sub>reg</sub> suppression.**

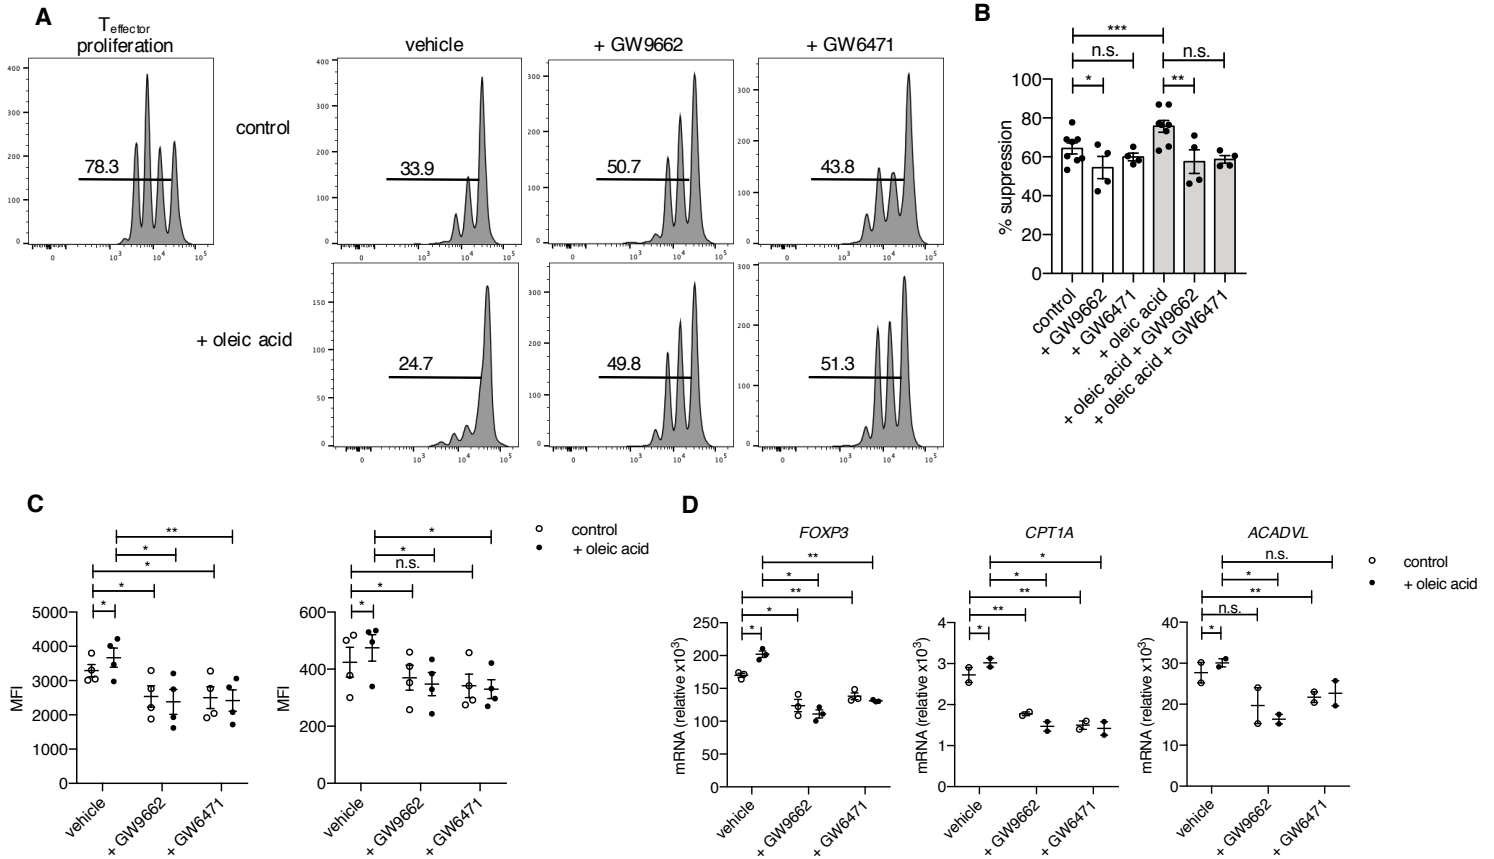

**Supplementary Figure 7. PPAR transcription factors play a role in oleic acid-mediated increased T<sub>reg</sub> suppression. (A)**

Proliferation of T<sub>eff</sub> cells, as measured by CFSE, cultured with T<sub>regs</sub> pre-incubated with vehicle (first column), 5 μM GW9662 (second column), or 5 μM GW6471 for 72 h and co-cultured with T<sub>eff</sub> cells in the presence or absence of 10 μM oleic acid. Proliferation was measured after 4 days in co-culture with T<sub>regs</sub> (n=4). Histograms are one representative experiment at the 1:2 ratio. **(B)** Summary of suppression data as described in **(A)**, from 2 independent experiments. Paired t-test corrected for multiple hypothesis testing using the Holm-Sidak method; \*P < 0.05; \*\*P < 0.01; \*\*\*P < 0.001; n.s. = not significant. **(C)** Expression of FOXP3 (left) or FOXP3 exon 2 (right) mean fluorescence intensity (MFI) in T<sub>reg</sub> cells stimulated in the presence or absence of oleic acid (10 μM), and either vehicle, 5 μM GW9662, or 5 μM GW6471 for 72 h. (n=4). Paired t-test corrected for multiple hypothesis testing using the Holm-Sidak method; \*P < 0.05; \*\*P < 0.01; n.s. = not significant. **(D)** mRNA expression of indicated genes in T<sub>reg</sub> cells stimulated in the presence or absence of oleic acid (10 μM), and either vehicle, 5 μM GW9662, or 5 μM GW6471 for 72 h. (n=4). Paired t-test corrected for multiple hypothesis testing using the Holm-Sidak method; \*P < 0.05; \*\*P < 0.01; n.s. = not significant. Data represents mean ± SEM.

**Supplementary Figure 8. Oleic acid does not drive ECAR in T<sub>regs</sub> or T<sub>eff</sub> cells.**

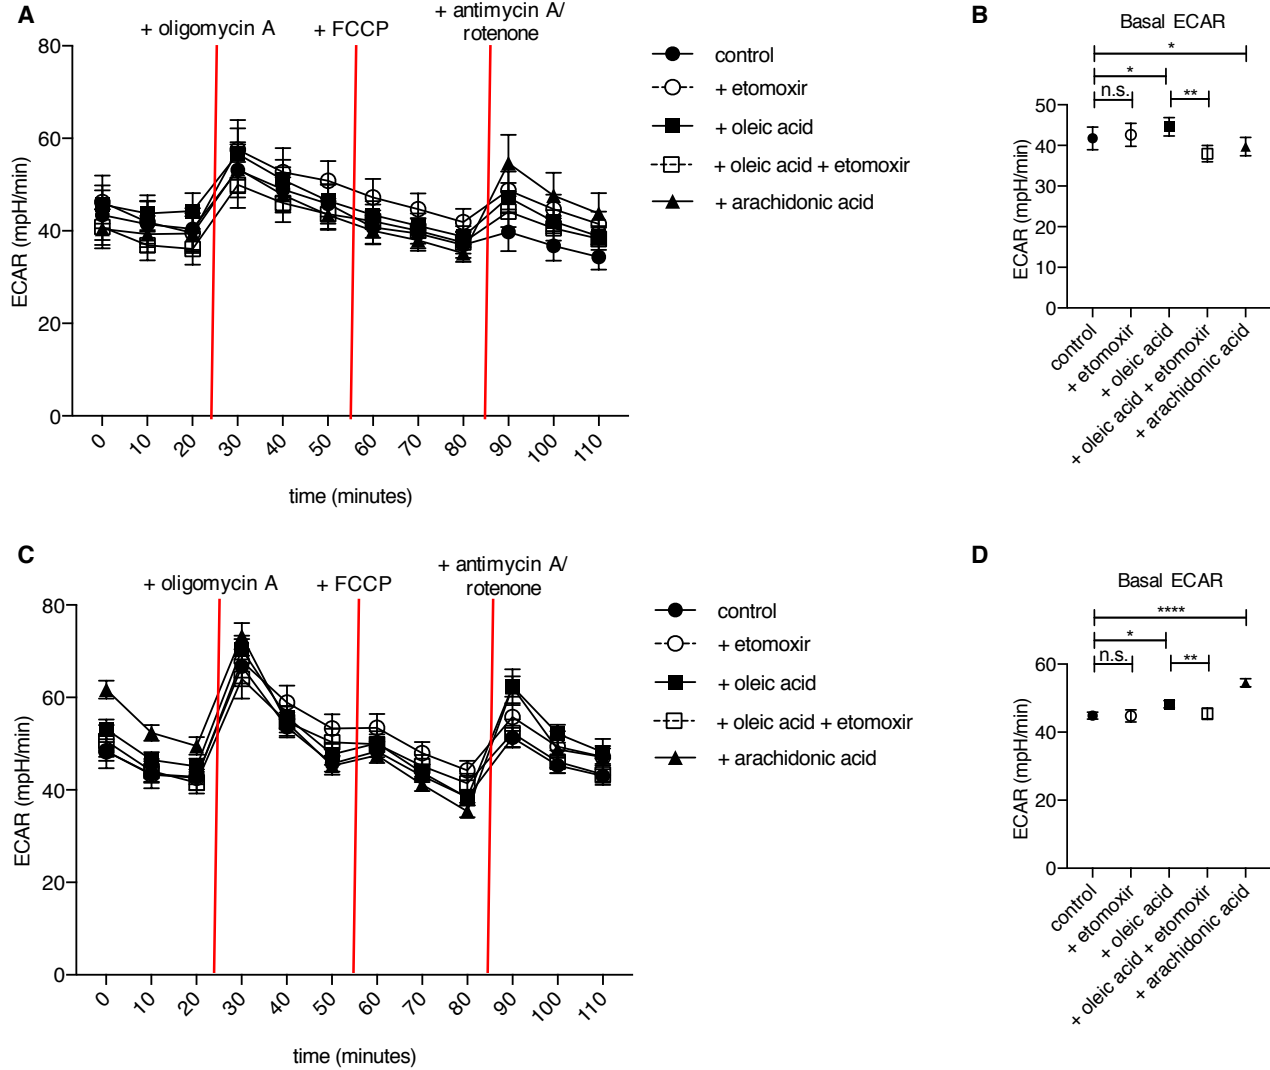

**Supplementary Figure 8. Oleic acid does not drive ECAR in T<sub>regs</sub> or T<sub>eff</sub> cells.** (A) Extracellular acidification rate (ECAR) of T<sub>regs</sub> stimulated in the presence or absence of etomoxir (50  $\mu$ M), oleic acid (10  $\mu$ M), oleic acid and etomoxir, or arachidonic acid (10  $\mu$ M) for 72 h (n=12). (B) Summary data of basal ECAR in T<sub>regs</sub> stimulated with the same conditions described in (A). Paired t-test corrected for multiple hypothesis testing using the Holm-Sidak method; \*P < 0.05; \*\*P < 0.01; n.s. = not significant. (C) ECAR of T<sub>eff</sub> stimulated in the presence or absence of etomoxir (50  $\mu$ M), oleic acid (10  $\mu$ M), oleic acid and etomoxir, or arachidonic acid (10  $\mu$ M) for 72 h (n=12). (D) Summary data of basal ECAR in T<sub>eff</sub> stimulated with the same conditions as (C). Paired t-test corrected for multiple hypothesis testing using the Holm-Sidak method; \*P < 0.05; \*\*P < 0.01; \*\*\*P < 0.001; \*\*\*\*P < 0.0001; n.s. = not significant. Data represents mean  $\pm$  SEM.



**Figure 9. Other omega-9 fatty acids do not increase suppressive capacity of T<sub>regs</sub>.**

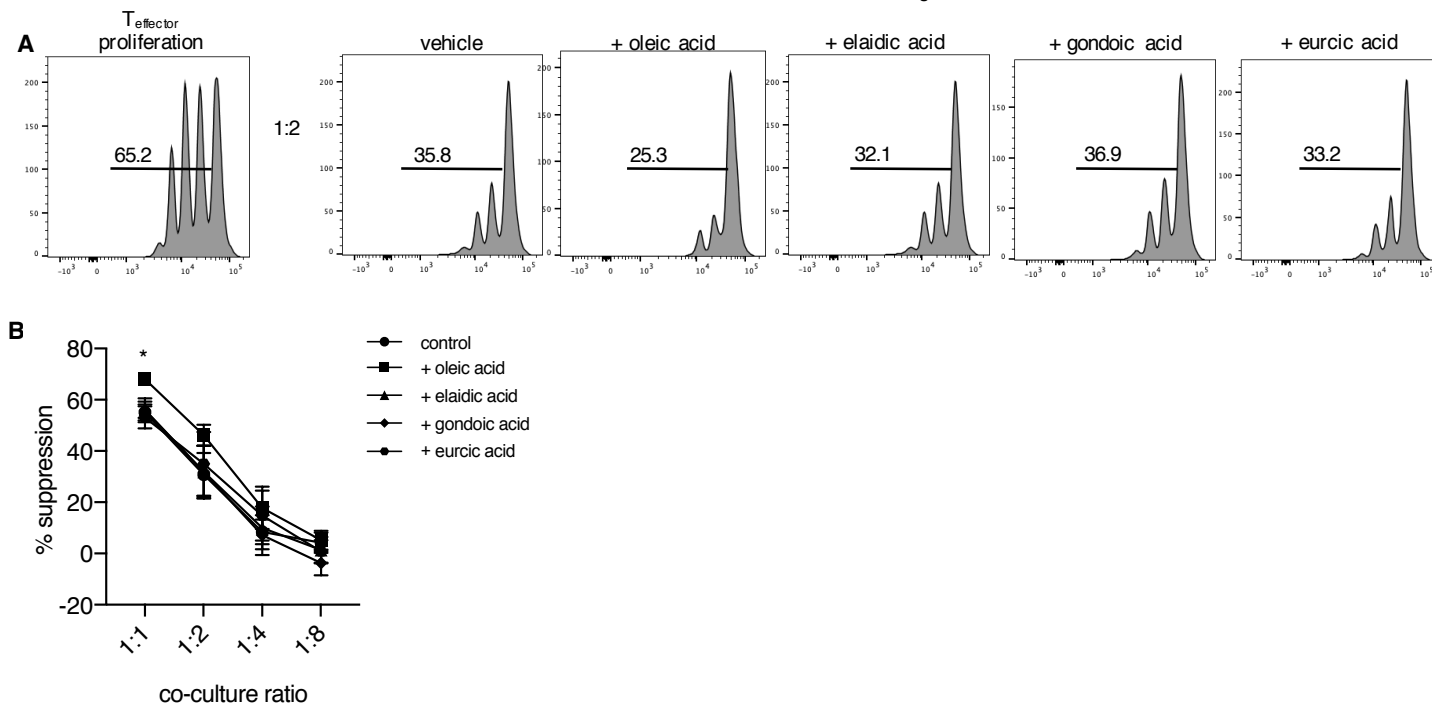

**Supplementary Figure 9. Other omega-9 fatty acids do not increase suppressive capacity of T<sub>regs</sub>.** (A) Proliferation of T<sub>reg</sub> cells, as measured by CFSE, cultured with T<sub>regs</sub> pre-incubated with vehicle (first column), 10  $\mu$ M oleic acid (second column), 10  $\mu$ M elaidic acid (third column), 10  $\mu$ M gondoic acid (fourth column), or 10  $\mu$ M eurcic acid (fifth column) for 72 h. Proliferation was measured after 4 days of co-culture (n=4). Histograms are one representative experiment at the 1:2 ratio. (B) Summary of suppression data as described in (A), from 2 independent experiments. Paired t-test corrected for multiple hypothesis testing using the Holm-Sidak method; \*P < 0.05. Data represents mean  $\pm$  SEM.

**Supplementary Figure 10. Oleic acid-induced expression of FOXP3 and STAT5 phosphorylation in T<sub>reg</sub> cells.**

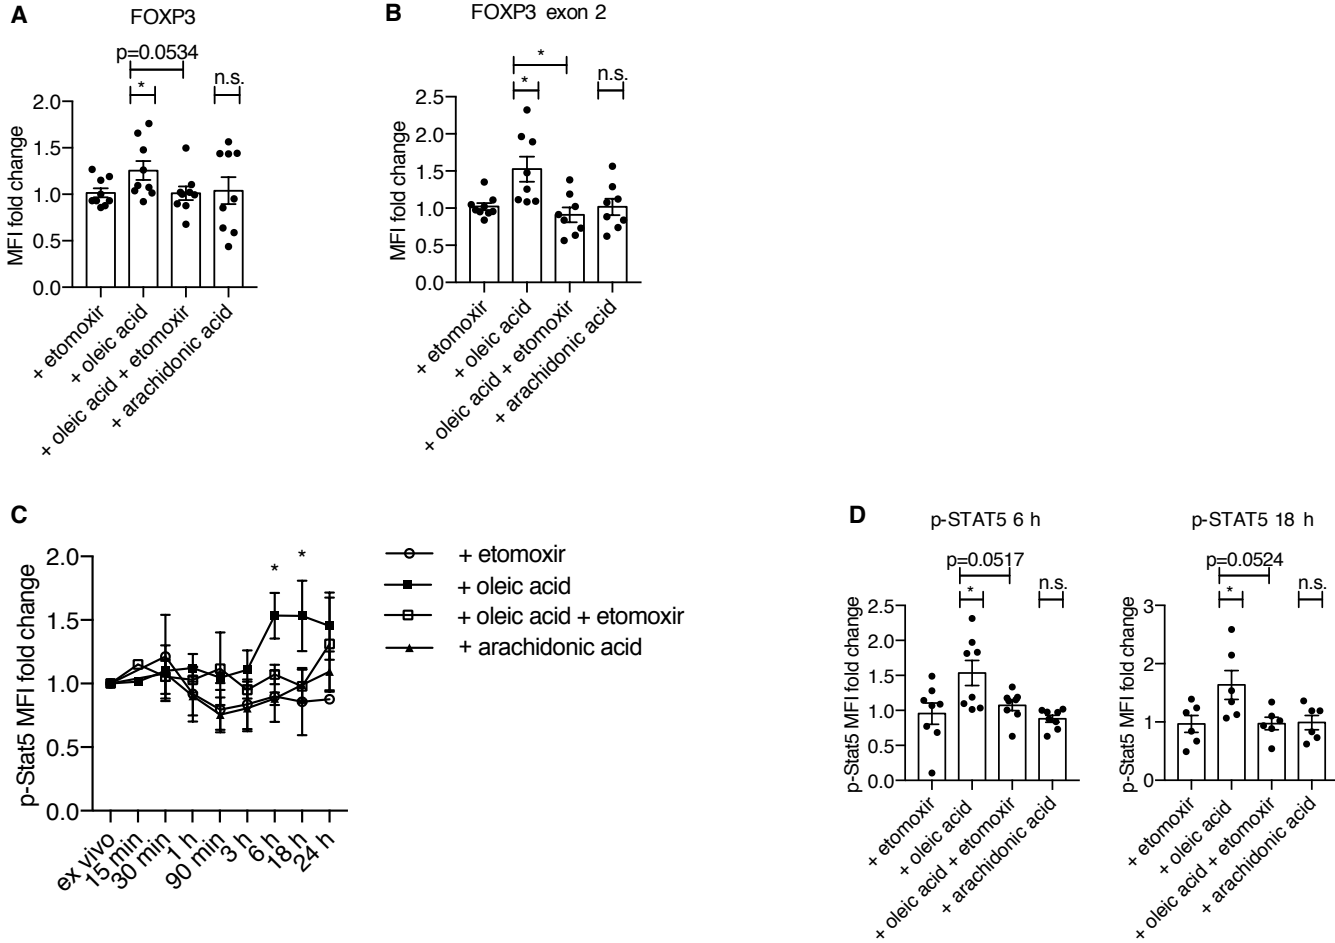

**Supplementary Figure 10. Oleic acid-induced expression of FOXP3 and STAT5 phosphorylation in T<sub>reg</sub> cells.** Summary data, relative to control, of the expression of **(A)** FOXP3 or **(B)** FOXP3 exon 2 mean fluorescence intensity (MFI) in T<sub>reg</sub> cells stimulated in the presence or absence of etomoxir (50  $\mu$ M), oleic acid (10  $\mu$ M), oleic acid and etomoxir, or arachidonic acid (10  $\mu$ M) for 72 h. Paired t-test corrected for multiple hypothesis testing using the Holm-Sidak method; \* $P < 0.05$ ; n.s. = not significant. **(C)** Kinetics of STAT5 phosphorylation, relative to control, in T<sub>regs</sub> stimulated with conditions described in **(A)** ( $n=8$ ) Paired t-test corrected for multiple hypothesis testing using the Holm-Sidak method; \* $P < 0.05$ . **(D)** One representative experiment of STAT5 phosphorylation, relative to control, in T<sub>regs</sub> after 6 h (left) and 18 h (right) of stimulation in the presence of conditions described in **(A)** Paired t-test corrected for multiple hypothesis testing using the Holm-Sidak method; \* $P < 0.05$ ; n.s. = not significant. Data represents mean  $\pm$  SEM.

Supplementary Figure 11. Expression of FOXP3 and phosphorylation of STAT5 are not upregulated by oleic acid in T<sub>eff</sub>.

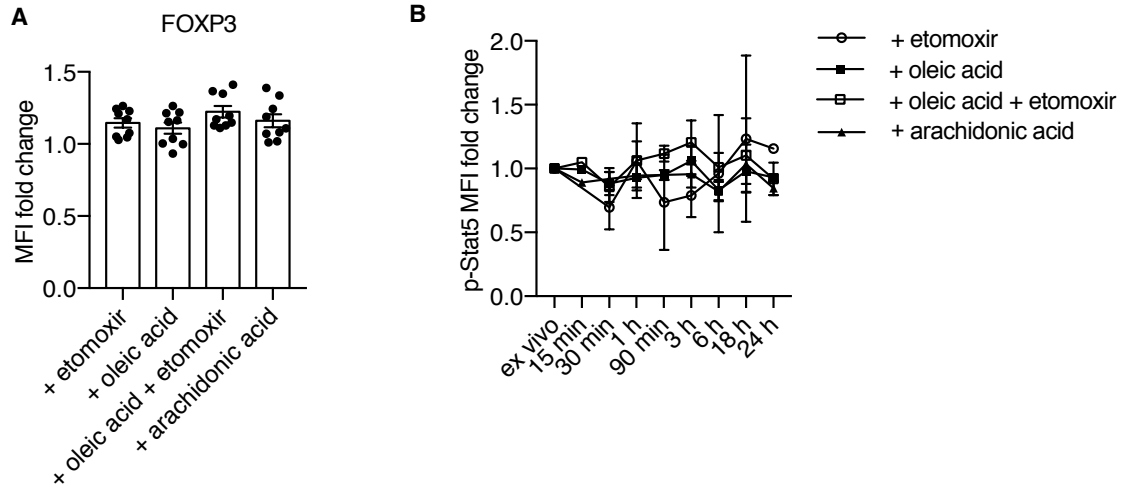

**Supplementary Figure 11. Expression of FOXP3 and phosphorylation of STAT5 are not upregulated by oleic acid in T<sub>eff</sub>. (A)** Summary data, relative to control, of the expression of FOXP3 mean fluorescence intensity (MFI) in T<sub>eff</sub> cells stimulated in the presence or absence of etomoxir (50  $\mu$ M), oleic acid (10  $\mu$ M), oleic acid and etomoxir, or arachidonic acid (10  $\mu$ M) for 72 h. **(B)** Kinetics of STAT5 phosphorylation, relative to control, in T<sub>eff</sub> stimulated with conditions described in **(A)** (n=8). Data represents mean  $\pm$  SEM.

**Supplementary Figure 12. CPT1A knockdown in T<sub>regs</sub>**

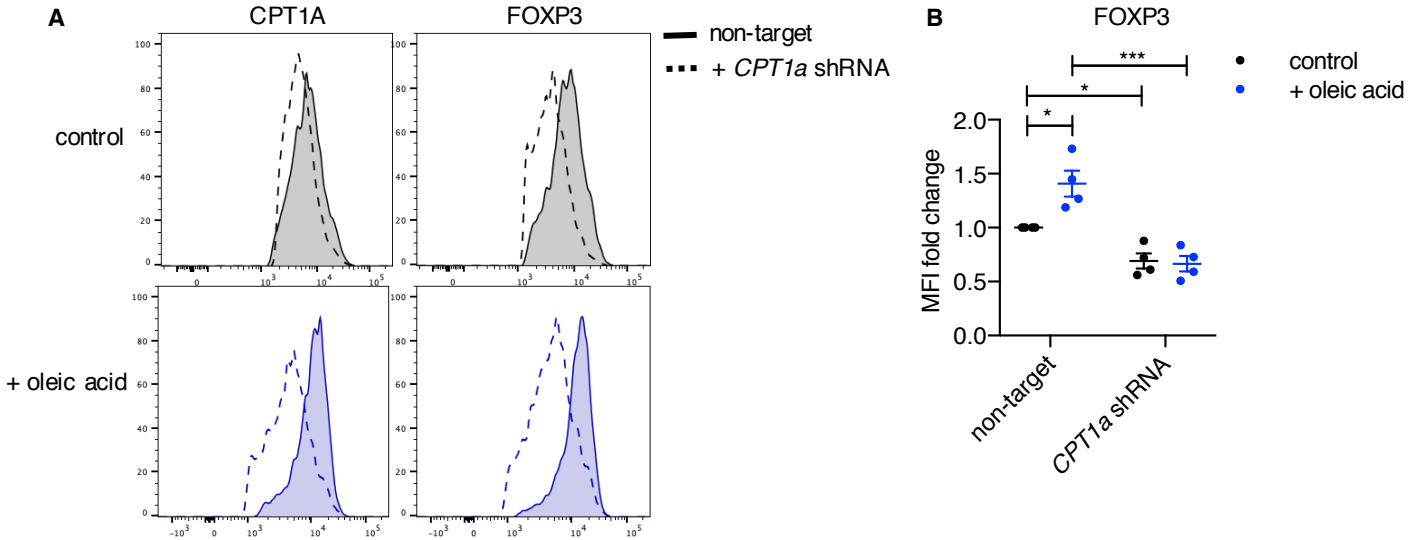

**Supplementary Figure 12. CPT1A knockdown in T<sub>regs</sub>.** (A) One representative experiment showing protein level knockdown for CPT1A and FOXP3 in control and oleic acid treated conditions. (B) Summary of mean fluorescence intensity (MFI) for FOXP3 protein staining upon CPT1A knockdown in T<sub>regs</sub> in the presence or absence 10  $\mu$ M of oleic acid after 72 h. Paired t-test corrected for multiple hypothesis testing using the Holm-Sidak method; \*P < 0.05; \*\*P < 0.01; \*\*\*P < 0.001. Data represents mean  $\pm$  SEM.

**Supplementary Figure 13. CD25 expression is dependent on mitochondrial respiration.**

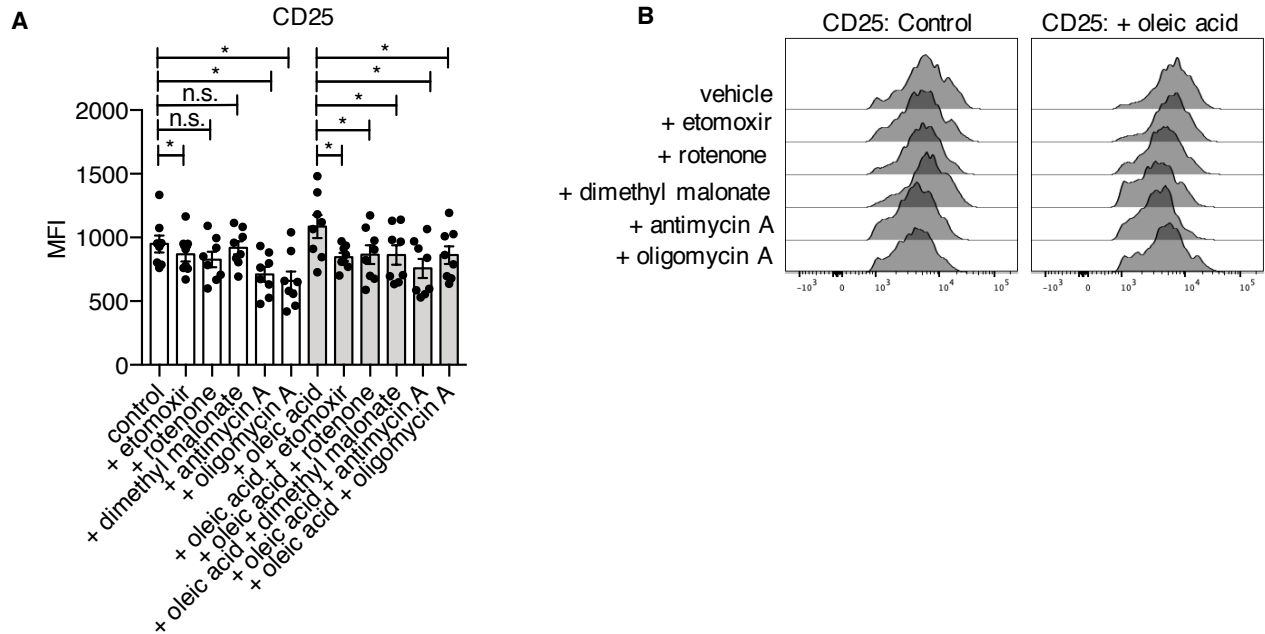

**Supplementary Figure 13. CD25 expression is dependent on mitochondrial respiration. (A)** Mean fluorescence intensity (MFI) of CD25 T<sub>regs</sub> stimulated in the presence or absence of 50  $\mu$ M etomoxir, 1  $\mu$ M rotenone, 10 mM dimethyl malonate, 1  $\mu$ M antimycin A, or 1  $\mu$ M oligomycin A for 72 h. (n=8). Paired t-test corrected for multiple hypothesis testing using the Holm-Sidak method; \*P < 0.05; n.s. = not significant. **(B)** One representative histogram plot from summary data in **(A)**. Data represents mean  $\pm$  SEM.

### Supplementary Figure 14. Donor Information

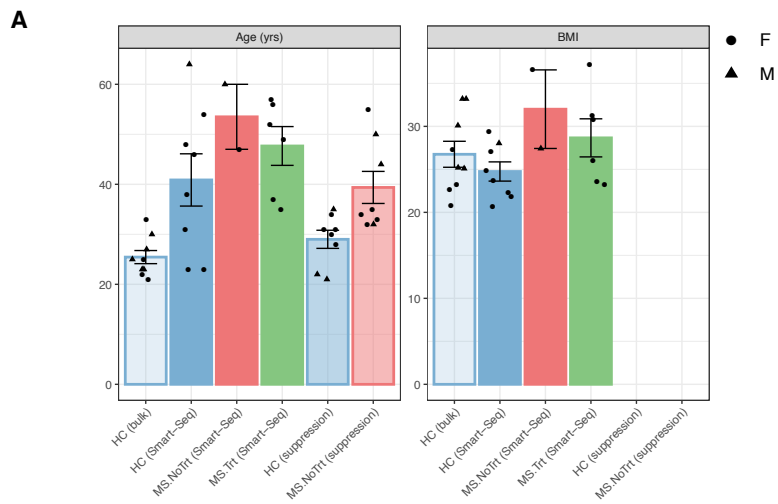

**Supplementary Figure 14. Donor Information. (A)** Mean and SEM error bars for age and body mass index (BMI) of the donors whose samples were used in the bulk RNA-Seq, single-cell Smart-Seq, and suppression assays. Self-reported height and weight, and BMI were recorded only for the RNA assays.

**Supplementary Figure 15. PC1 correlates with the intercept of a linear model that infers oleic versus arachidonic acid effects**

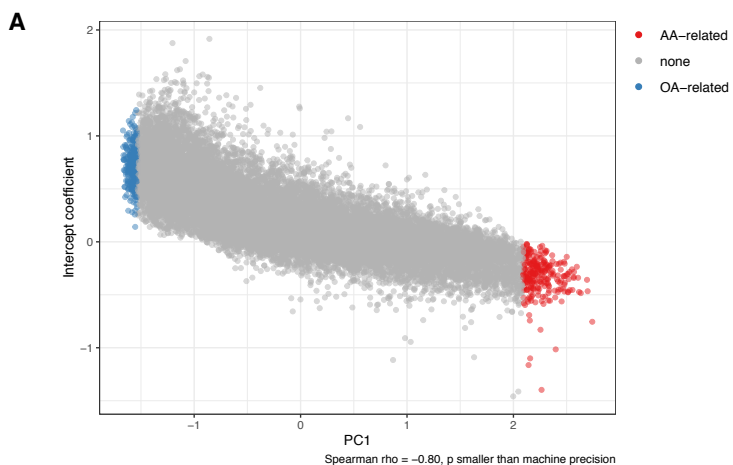

**Supplementary Figure 15. PC1 correlates with intercept of linear models to infer oleic versus arachidonic specific effects. (A)** Correlation of PC1 loadings and intercept of a direct model comparison (Methods) per gene, colored dots are the bottom and top 250 genes by PC1 loading defined as the oleic- and arachidonic acid related genes.

Supplementary Figure 16. Enrichment of KEGG pathways in the oleic and arachidonic acid transcriptome modules

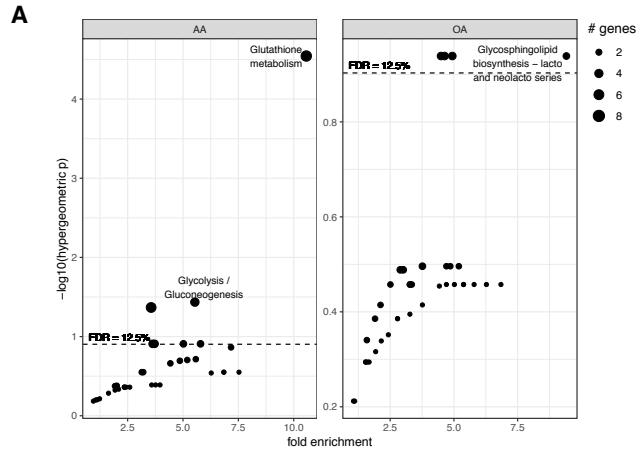

**Supplementary Figure 16. Enrichment of KEGG pathways in the oleic and arachidonic acid transcriptome modules. (A)** Hypergeometric enrichment was computed for the oleic and arachidonic acid gene modules of the computational transcriptomic signature (Methods) in KEGG metabolic pathways. P-values were adjusted for multiple comparisons with the Benjamini-Hochberg method. Dot size represents the number of genes overlapping between a fatty acid module and a KEGG pathway.



Supplementary Figure 17. Oleic acid treatment can counteract inflammatory signals.

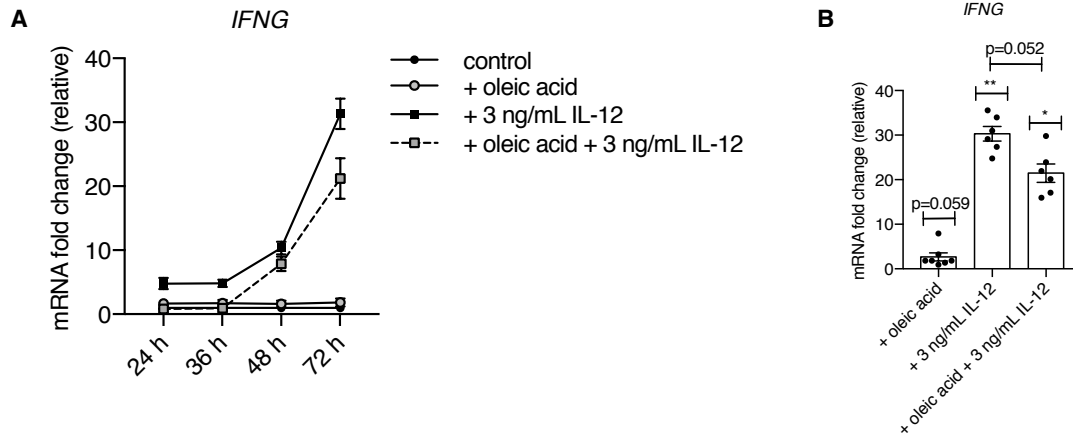

Supplementary Figure 17. Oleic acid treatment can counteract inflammatory signals. (A) Kinetics of *IFNG* expression, relative to control, in  $T_{reg}$ s treated with 10  $\mu$ M oleic acid, 3 ng/mL IL-12, or both oleic acid and IL-12 (n=6). (B) Summary of (A) at 72 h. (n=6). Paired t-test corrected for multiple hypothesis testing using the Holm-Sidak method; \*P < 0.05; \*\*P < 0.01. Data represents mean  $\pm$  SEM.

**Supplementary Figure 18. Mitochondrial respiration influences expression of cytokines in T<sub>regs</sub>**

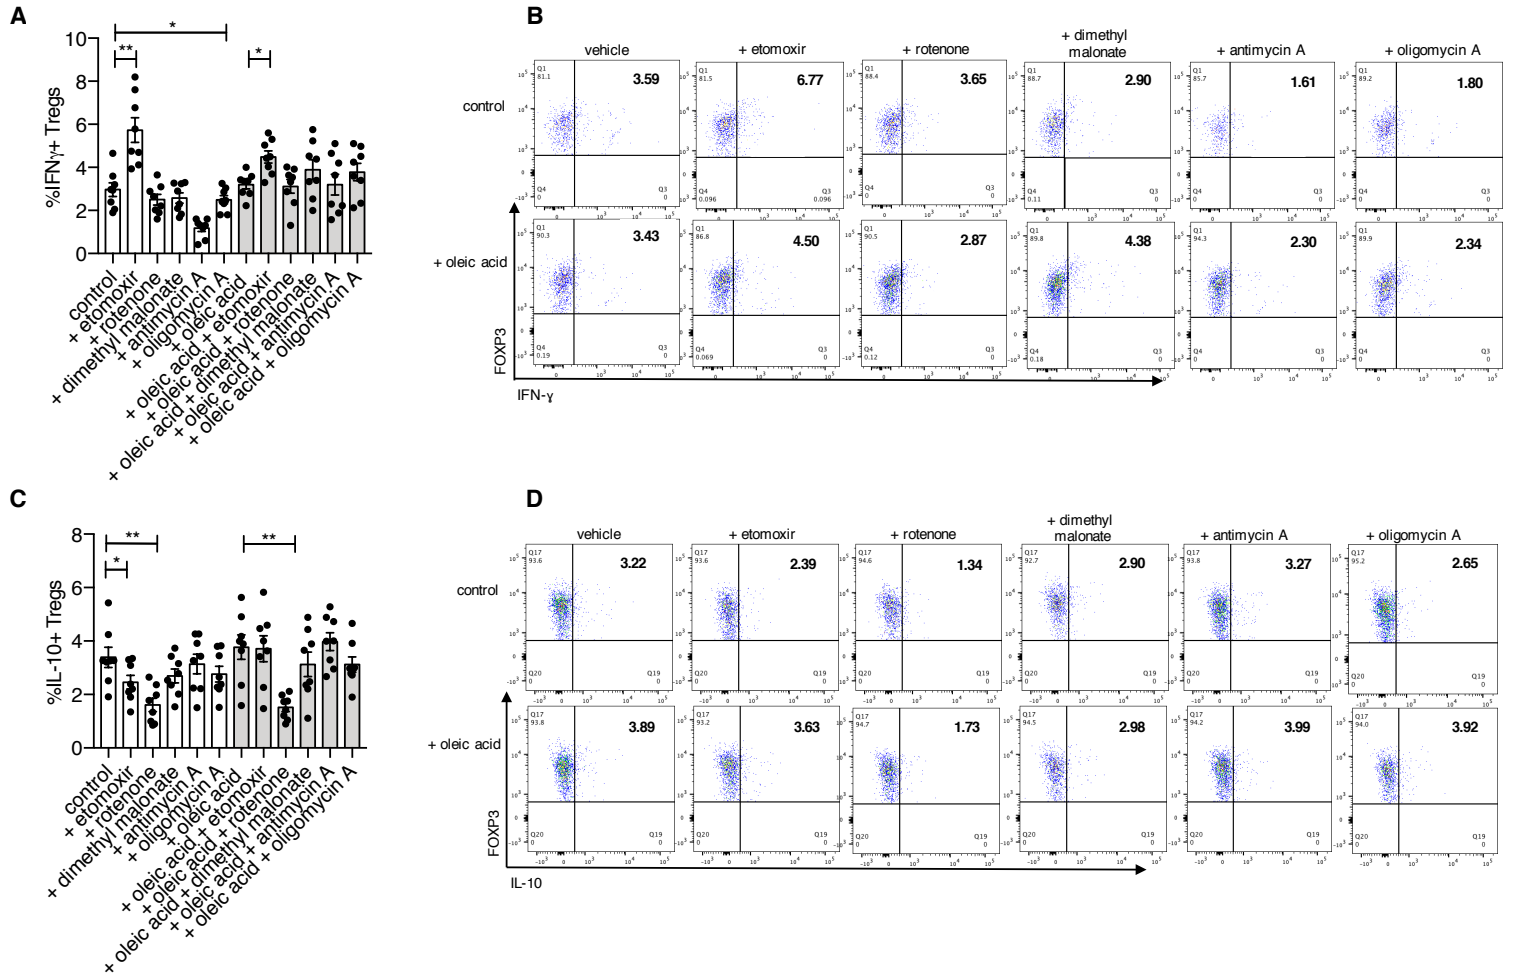

**Supplementary Figure 18. Mitochondrial respiration influences expression of cytokines in T<sub>regs</sub>** (A) Mean fluorescence intensity (MFI) of IFN- $\gamma$  in T<sub>regs</sub> stimulated in the presence or absence 10  $\mu$ M oleic acid, and 50  $\mu$ M etomoxir, 1  $\mu$ M rotenone, 10 mM dimethyl malonate, 1  $\mu$ M antimycin A, or 1  $\mu$ M oligomycin A for 72 h. Prior to fixation and antibody staining, T<sub>regs</sub> were stimulated for 4 hours with phorbol 12-myristate 13-acetate (PMA) and ionomycin in the presence of Golgistop (n=8). Paired t-test corrected for multiple hypothesis testing using the Holm-Sidak method; \*P < 0.05; \*\*P < 0.01. (B) One representative histogram of summary data in (A). (C) Mean fluorescence intensity (MFI) of IL-10 in T<sub>regs</sub> stimulated in the presence or absence 10  $\mu$ M oleic acid, and 50  $\mu$ M etomoxir, 1  $\mu$ M rotenone, 10 mM dimethyl malonate, 1  $\mu$ M antimycin A, or 1  $\mu$ M oligomycin A for 72 h. Prior to fixation and antibody staining, T<sub>regs</sub> were stimulated for 4 hours with phorbol 12-myristate 13-acetate (PMA) and ionomycin in the presence of Golgistop (n=8). Paired t-test corrected for multiple hypothesis testing using the Holm-Sidak method; \*P < 0.05; \*\*P < 0.01. (D) One representative histogram of summary data in (C). Data represents mean  $\pm$  SEM.

**Supplementary Table 1. Donor demographics for bulk RNA sequencing of T<sub>regs</sub> treated with oleic or arachidonic acid**

| Age | Height (cm) | Weight (kg) | BMI  | Gender | Date Collected | Date Processed | Date Sequenced |
|-----|-------------|-------------|------|--------|----------------|----------------|----------------|
| 21  | 170.1       | 65.8        | 22.7 | F      | 6-18-18        | 6-24-18        | 6-28-18        |
| 30  | 193.0       | 93.9        | 25.2 | M      | 6-19-18        | 6-24-18        | 6-28-18        |
| 23  | 175.3       | 102.1       | 33.2 | M      | 8-6-18         | 8-13-18        | 8-20-18        |
| 33  | 162.6       | 61.2        | 23.2 | F      | 8-6-18         | 8-13-18        | 8-20-18        |
| 22  | 154.9       | 49.9        | 20.8 | F      | 8-6-18         | 8-13-18        | 8-20-18        |
| 25  | 160.0       | 69.9        | 27.3 | F      | 1-7-19         | 1-7-19         | 1-25-19        |
| 25  | 182.9       | 83.9        | 25.1 | M      | 1-7-19         | 1-7-19         | 1-25-19        |
| 27  | 177.8       | 95.3        | 30.1 | M      | 1-7-19         | 1-7-19         | 1-25-19        |
| 23  | 175.3       | 102.1       | 33.2 | M      | 1-7-19         | 1-7-19         | 1-25-19        |

**Supplementary Table 1. Donor demographics for bulk RNA sequencing of T<sub>regs</sub> treated with oleic or arachidonic acid.** Age, height, weight, body mass index (BMI), gender, and processing dates for peripheral blood T<sub>regs</sub> from healthy subjects used for bulk sequencing after stimulated in the presence of oleic or arachidonic acid.

**Supplementary Table 2. Transcriptomic signature of oleic- vs. arachidonic stimuli**

| symbol  | limma-based analysis |         |        |          |           | PC1-based analysis |         |                 |
|---------|----------------------|---------|--------|----------|-----------|--------------------|---------|-----------------|
|         | logFC                | AveExpr | t      | P.Value  | adj.P.Val | B                  | PC1     | PC1 gene module |
| GDA     | 1.382                | 1.0695  | 10.653 | 1.19E-06 | 0.003     | 5.91               | -1.4859 | none            |
| EPHB4   | 1.211                | 0.9936  | 9.7736 | 2.56E-06 | 0.003     | 5.23               | -1.4756 | none            |
| IGDCC3  | 1.402                | 1.1349  | 9.4921 | 3.32E-06 | 0.003     | 4.99               | -1.2976 | none            |
| A4GALT  | 1.423                | 1.2497  | 9.3523 | 3.78E-06 | 0.003     | 4.87               | -1.2301 | none            |
| FAM117A | 1.168                | 0.9322  | 9.2526 | 4.15E-06 | 0.003     | 4.79               | -1.0209 | none            |
| TUBB4A  | 1.412                | 0.9808  | 9.2047 | 4.34E-06 | 0.003     | 4.75               | -1.2581 | none            |
| GIN53   | 1.154                | 0.9533  | 9.0167 | 5.20E-06 | 0.003     | 4.58               | -1.1929 | none            |
| ZSCAN2  | 1.131                | 0.8166  | 8.9607 | 5.49E-06 | 0.003     | 4.53               | -1.2315 | none            |
| GPR173  | 1.162                | 0.9122  | 8.9532 | 5.53E-06 | 0.003     | 4.52               | -1.1335 | none            |
| CSF2RA  | 1.18                 | 0.9632  | 8.95   | 5.55E-06 | 0.003     | 4.52               | -1.28   | none            |
| BTNL9   | 1.196                | 0.947   | 8.9473 | 5.56E-06 | 0.003     | 4.52               | -1.3063 | none            |
| RIMS2   | 1.155                | 0.9478  | 8.9143 | 5.74E-06 | 0.003     | 4.49               | -1.2264 | none            |
| SLC19A3 | 1.389                | 1.1266  | 8.8942 | 5.86E-06 | 0.003     | 4.47               | -1.2381 | none            |
| ARSE    | 1.353                | 1.095   | 8.8918 | 5.87E-06 | 0.003     | 4.47               | -0.9005 | none            |
| DMWD    | 1.128                | 0.9113  | 8.8768 | 5.96E-06 | 0.003     | 4.45               | -1.3384 | none            |
| PCGF6   | 1.054                | 0.7806  | 8.8508 | 6.11E-06 | 0.003     | 4.43               | -1.2517 | none            |
| COPS7B  | 1.17                 | 0.9709  | 8.7965 | 6.45E-06 | 0.003     | 4.38               | -1.3272 | none            |
| WNK4    | 1.042                | 0.8473  | 8.7817 | 6.54E-06 | 0.003     | 4.37               | -1.5055 | none            |
| ZNF726  | 1.564                | 1.2707  | 8.7793 | 6.56E-06 | 0.003     | 4.37               | -0.951  | none            |
| SMPD3   | 1.119                | 0.9216  | 8.7616 | 6.67E-06 | 0.003     | 4.35               | -1.3286 | none            |
| MAPK3   | 1.004                | 0.7429  | 8.7358 | 6.85E-06 | 0.003     | 4.33               | -0.7326 | none            |
| REPS1   | 1.241                | 1.0258  | 8.693  | 7.14E-06 | 0.003     | 4.29               | -1.1675 | none            |
| ZNF90   | 1.185                | 0.9639  | 8.69   | 7.16E-06 | 0.003     | 4.28               | -1.3105 | none            |
| RAB5B   | 1.054                | 0.8049  | 8.6853 | 7.20E-06 | 0.003     | 4.28               | -1.5151 | none            |
| ZNF169  | 1.045                | 0.8424  | 8.6768 | 7.26E-06 | 0.003     | 4.27               | -1.5196 | none            |
| PANO1   | 1.172                | 0.8659  | 8.6512 | 7.45E-06 | 0.003     | 4.25               | -1.147  | none            |
| MYH7B   | 1.048                | 0.887   | 8.5909 | 7.91E-06 | 0.003     | 4.19               | -1.365  | none            |
| SEMA6B  | 1.26                 | 1.0597  | 8.5749 | 8.04E-06 | 0.003     | 4.18               | -1.1662 | none            |
| TSEN2   | 1.222                | 0.9777  | 8.5738 | 8.05E-06 | 0.003     | 4.17               | -1.2215 | none            |
| GAB3    | 1.13                 | 1.0347  | 8.5084 | 8.60E-06 | 0.003     | 4.11               | -1.0922 | none            |
| PADI4   | 1.058                | 0.7957  | 8.5051 | 8.63E-06 | 0.003     | 4.11               | -1.4457 | none            |
| AP3B2   | 1.147                | 0.8956  | 8.4999 | 8.67E-06 | 0.003     | 4.1                | -1.4958 | none            |
| ARNT2   | 1.1                  | 0.8447  | 8.4908 | 8.75E-06 | 0.003     | 4.1                | -1.3079 | none            |
| PHLDB1  | 1.13                 | 0.9314  | 8.4644 | 8.99E-06 | 0.003     | 4.07               | -1.4808 | none            |
| CYP3A43 | 0.992                | 0.7851  | 8.4553 | 9.07E-06 | 0.003     | 4.06               | -1.0946 | none            |
| ABCA8   | 0.954                | 0.7071  | 8.4469 | 9.15E-06 | 0.003     | 4.05               | -1.1935 | none            |
| COG7    | 1.509                | 1.2902  | 8.4046 | 9.55E-06 | 0.003     | 4.01               | -1.1816 | none            |
| SIRT5   | 1.056                | 0.8016  | 8.4025 | 9.58E-06 | 0.003     | 4.01               | -1.2781 | none            |

|          |       |        |        |          |       |      |         |            |
|----------|-------|--------|--------|----------|-------|------|---------|------------|
| CNTNAP3E | 1.002 | 0.7953 | 8.4007 | 9.59E-06 | 0.003 | 4.01 | -1.4494 | none       |
| ZNF674   | 1.301 | 1.0325 | 8.3881 | 9.72E-06 | 0.003 | 4    | -1.5118 | none       |
| AS3MT    | 1.049 | 0.9075 | 8.3599 | 1.00E-05 | 0.003 | 3.97 | -1.5306 | none       |
| CHMP1B   | 0.961 | 0.7105 | 8.3586 | 1.00E-05 | 0.003 | 3.97 | -1.1124 | none       |
| PLA2G4C  | 1.247 | 1.0659 | 8.3272 | 1.03E-05 | 0.003 | 3.94 | -1.4285 | none       |
| SLC1A2   | 0.928 | 0.7001 | 8.3123 | 1.05E-05 | 0.003 | 3.92 | -1.443  | none       |
| FAM221B  | 1.026 | 0.8067 | 8.2892 | 1.08E-05 | 0.003 | 3.9  | -0.9206 | none       |
| PIWIL2   | 0.907 | 0.632  | 8.2324 | 1.14E-05 | 0.003 | 3.85 | -0.836  | none       |
| ZNF527   | 1.12  | 0.9059 | 8.2099 | 1.17E-05 | 0.003 | 3.82 | -0.9552 | none       |
| ITGA10   | 0.972 | 0.7904 | 8.2076 | 1.17E-05 | 0.003 | 3.82 | -1.291  | none       |
| FAM178B  | 1.087 | 0.8647 | 8.204  | 1.18E-05 | 0.003 | 3.82 | -1.1762 | none       |
| SUDS3    | 1.042 | 0.8515 | 8.1891 | 1.19E-05 | 0.003 | 3.8  | -1.1361 | none       |
| DLST     | 1.16  | 0.9146 | 8.1624 | 1.23E-05 | 0.003 | 3.78 | -1.383  | none       |
| RASGEF1B | 1.35  | 1.1745 | 8.1391 | 1.26E-05 | 0.003 | 3.75 | -1.1252 | none       |
| LRRC49   | 1.33  | 1.0191 | 8.1335 | 1.27E-05 | 0.003 | 3.75 | -1.2779 | none       |
| LRRC8E   | 0.973 | 0.7705 | 8.081  | 1.34E-05 | 0.003 | 3.7  | -1.5287 | none       |
| HECW1    | 1.118 | 0.8601 | 8.0758 | 1.34E-05 | 0.003 | 3.69 | -1.4642 | none       |
| TCF23    | 0.957 | 0.7457 | 8.0728 | 1.35E-05 | 0.003 | 3.69 | -1.6057 | OA-related |
| TLE2     | 1.229 | 0.9549 | 8.0618 | 1.36E-05 | 0.003 | 3.68 | -1.3341 | none       |
| PCNX2    | 1.029 | 0.8807 | 8.0431 | 1.39E-05 | 0.003 | 3.66 | -1.2594 | none       |
| TMEM145  | 1.192 | 1.0017 | 8.031  | 1.41E-05 | 0.003 | 3.65 | -1.2669 | none       |
| WDR59    | 1.227 | 1.0095 | 8.0214 | 1.42E-05 | 0.003 | 3.64 | -1.2873 | none       |
| KLC4     | 1.281 | 1.0821 | 8.0203 | 1.43E-05 | 0.003 | 3.64 | -1.2248 | none       |
| FN3K     | 1.125 | 0.8946 | 8.0078 | 1.44E-05 | 0.003 | 3.62 | -1.1952 | none       |
| ZNF684   | 0.959 | 0.7163 | 7.9913 | 1.47E-05 | 0.003 | 3.61 | -1.2584 | none       |
| TBC1D30  | 1.114 | 0.8754 | 7.9754 | 1.50E-05 | 0.003 | 3.59 | -1.3227 | none       |
| EVI5     | 1.055 | 0.9232 | 7.964  | 1.51E-05 | 0.003 | 3.58 | -1.0819 | none       |
| TVP23C   | 1.098 | 0.8788 | 7.963  | 1.52E-05 | 0.003 | 3.58 | -1.2603 | none       |
| VASH2    | 1.309 | 1.1433 | 7.932  | 1.57E-05 | 0.003 | 3.55 | -1.1479 | none       |
| ZNF556   | 0.916 | 0.6976 | 7.9251 | 1.58E-05 | 0.003 | 3.54 | -1.5733 | OA-related |
| FRMPD1   | 1.065 | 0.8317 | 7.9243 | 1.58E-05 | 0.003 | 3.54 | -1.2668 | none       |
| IL31RA   | 0.97  | 0.7734 | 7.9225 | 1.58E-05 | 0.003 | 3.54 | -1.3996 | none       |
| MOB3B    | 1.055 | 0.8222 | 7.9143 | 1.60E-05 | 0.003 | 3.53 | -1.531  | none       |
| FMO3     | 1.149 | 0.9374 | 7.9143 | 1.60E-05 | 0.003 | 3.53 | -1.4726 | none       |
| ATL2     | 1.112 | 0.8472 | 7.8892 | 1.64E-05 | 0.003 | 3.5  | -1.4119 | none       |
| MROH8    | 1.074 | 0.7536 | 7.8833 | 1.65E-05 | 0.003 | 3.5  | -1.1909 | none       |
| SLC9A6   | 0.96  | 0.7719 | 7.8806 | 1.65E-05 | 0.003 | 3.49 | -1.0024 | none       |
| INMT     | 0.987 | 0.7624 | 7.8802 | 1.66E-05 | 0.003 | 3.49 | -1.5664 | OA-related |
| RASSF6   | 1.05  | 0.8464 | 7.8726 | 1.67E-05 | 0.003 | 3.49 | -1.295  | none       |
| TLCD2    | 0.916 | 0.7042 | 7.859  | 1.69E-05 | 0.003 | 3.47 | -1.6334 | OA-related |

|          |       |        |        |          |       |      |         |            |
|----------|-------|--------|--------|----------|-------|------|---------|------------|
| ATP8B1   | 1.384 | 1.2569 | 7.8565 | 1.70E-05 | 0.003 | 3.47 | -0.697  | none       |
| ACE      | 1.083 | 0.8805 | 7.8246 | 1.76E-05 | 0.003 | 3.44 | -1.5817 | OA-related |
| PSD3     | 1.423 | 1.1777 | 7.8233 | 1.76E-05 | 0.003 | 3.44 | -0.8647 | none       |
| NMT2     | 1.016 | 0.7854 | 7.8188 | 1.77E-05 | 0.003 | 3.43 | -1.5005 | none       |
| CCDC40   | 1.121 | 0.9208 | 7.8107 | 1.78E-05 | 0.003 | 3.42 | -1.3009 | none       |
| FAM129C  | 0.971 | 0.7882 | 7.8063 | 1.79E-05 | 0.003 | 3.42 | -1.5963 | OA-related |
| EPB41L4A | 0.918 | 0.75   | 7.8053 | 1.79E-05 | 0.003 | 3.42 | -0.7739 | none       |
| CD22     | 1.117 | 0.858  | 7.8031 | 1.80E-05 | 0.003 | 3.41 | -1.3248 | none       |
| ETNPPL   | 0.902 | 0.7254 | 7.7693 | 1.87E-05 | 0.003 | 3.38 | -0.8541 | none       |
| SLC4A5   | 0.974 | 0.717  | 7.7589 | 1.89E-05 | 0.003 | 3.37 | -1.5056 | none       |
| CALCRL   | 1.023 | 0.8321 | 7.7534 | 1.90E-05 | 0.003 | 3.36 | -1.3451 | none       |
| CERCAM   | 1.004 | 0.8309 | 7.7481 | 1.91E-05 | 0.003 | 3.36 | -1.3596 | none       |
| SFI1     | 1.036 | 0.8341 | 7.7384 | 1.93E-05 | 0.003 | 3.35 | -1.3638 | none       |
| RASL10B  | 1.171 | 0.9501 | 7.7374 | 1.93E-05 | 0.003 | 3.35 | -1.107  | none       |
| PRKAA1   | 1.046 | 0.813  | 7.7314 | 1.94E-05 | 0.003 | 3.34 | -1.1533 | none       |
| DEFB133  | 0.816 | 0.5534 | 7.7175 | 1.97E-05 | 0.003 | 3.33 | -0.8891 | none       |
| MS4A7    | 1.172 | 0.8629 | 7.7173 | 1.97E-05 | 0.003 | 3.33 | -1.3517 | none       |
| MILR1    | 1.302 | 1.0556 | 7.7074 | 2.00E-05 | 0.003 | 3.32 | -1.4239 | none       |
| LHFPL5   | 0.959 | 0.8284 | 7.6979 | 2.02E-05 | 0.003 | 3.31 | -1.4104 | none       |
| CDH3     | 1.227 | 0.9193 | 7.6738 | 2.07E-05 | 0.003 | 3.28 | -1.0937 | none       |
| CLEC4C   | 0.839 | 0.6441 | 7.6684 | 2.08E-05 | 0.003 | 3.27 | -1.5918 | OA-related |
| SCIN     | 1.12  | 0.8632 | 7.6682 | 2.08E-05 | 0.003 | 3.27 | -1.4616 | none       |
| OSBPL6   | 1.016 | 0.8079 | 7.6641 | 2.09E-05 | 0.003 | 3.27 | -1.212  | none       |
| MYT1L    | 1.097 | 0.8918 | 7.6533 | 2.12E-05 | 0.003 | 3.26 | -1.3765 | none       |
| NR5A2    | 1.025 | 0.8082 | 7.6398 | 2.15E-05 | 0.003 | 3.24 | -1.5343 | OA-related |
| TP63     | 1.08  | 0.8787 | 7.6352 | 2.16E-05 | 0.003 | 3.24 | -1.064  | none       |
| WDR73    | 1.272 | 1.0453 | 7.6315 | 2.17E-05 | 0.003 | 3.24 | -1.3367 | none       |
| NPAS3    | 1.876 | 1.6086 | 7.6276 | 2.18E-05 | 0.003 | 3.23 | -1.2034 | none       |
| DYNC2LI1 | 1.007 | 0.7447 | 7.626  | 2.18E-05 | 0.003 | 3.23 | -0.9972 | none       |
| TMEM98   | 1.411 | 1.0366 | 7.6002 | 2.25E-05 | 0.003 | 3.2  | -0.9995 | none       |
| NSUN3    | 1.054 | 0.7757 | 7.5823 | 2.29E-05 | 0.003 | 3.18 | -1.0756 | none       |
| TMEM213  | 0.953 | 0.7285 | 7.5752 | 2.31E-05 | 0.003 | 3.18 | -1.2309 | none       |
| PHYHD1   | 1.498 | 1.2676 | 7.571  | 2.32E-05 | 0.003 | 3.17 | -1.165  | none       |
| ECD      | 0.991 | 0.7752 | 7.5694 | 2.32E-05 | 0.003 | 3.17 | -1.5102 | none       |
| MORN4    | 0.938 | 0.7263 | 7.5652 | 2.33E-05 | 0.003 | 3.17 | -1.3962 | none       |
| ZNF567   | 1.026 | 0.8783 | 7.5652 | 2.33E-05 | 0.003 | 3.17 | -1.1231 | none       |
| IFT80    | 0.941 | 0.7553 | 7.561  | 2.34E-05 | 0.003 | 3.16 | -1.4736 | none       |
| SNUPN    | 0.944 | 0.7297 | 7.5518 | 2.37E-05 | 0.003 | 3.15 | -1.4555 | none       |
| IDO1     | 0.829 | 0.5731 | 7.5456 | 2.39E-05 | 0.003 | 3.15 | -1.5159 | none       |
| AACS     | 0.929 | 0.7392 | 7.5311 | 2.42E-05 | 0.003 | 3.13 | -1.5224 | none       |

|          |       |        |        |          |       |      |         |            |
|----------|-------|--------|--------|----------|-------|------|---------|------------|
| RNF212   | 1.549 | 1.2432 | 7.5263 | 2.44E-05 | 0.003 | 3.12 | -0.8615 | none       |
| SLC4A1   | 0.915 | 0.7007 | 7.5225 | 2.45E-05 | 0.003 | 3.12 | -1.3974 | none       |
| CLN3     | 0.958 | 0.7077 | 7.5175 | 2.46E-05 | 0.003 | 3.12 | -1.3704 | none       |
| ALDH7A1  | 1.051 | 0.8493 | 7.504  | 2.50E-05 | 0.003 | 3.1  | -1.6688 | OA-related |
| PIP5KL1  | 0.98  | 0.8037 | 7.5019 | 2.50E-05 | 0.003 | 3.1  | -0.4353 | none       |
| UGT2B4   | 1.01  | 0.7262 | 7.4935 | 2.53E-05 | 0.003 | 3.09 | -1.1892 | none       |
| GDPD1    | 1.105 | 0.9405 | 7.468  | 2.60E-05 | 0.003 | 3.06 | -1.3071 | none       |
| CXXC5    | 1.408 | 1.1984 | 7.4607 | 2.62E-05 | 0.003 | 3.05 | -1.3075 | none       |
| SHROOM4  | 1.005 | 0.7822 | 7.4529 | 2.64E-05 | 0.003 | 3.05 | -1.3959 | none       |
| DNAAF1   | 0.964 | 0.7711 | 7.4442 | 2.67E-05 | 0.003 | 3.04 | -0.635  | none       |
| ZNF554   | 0.912 | 0.7491 | 7.44   | 2.68E-05 | 0.003 | 3.03 | -1.5096 | none       |
| PLCE1    | 1.358 | 1.1043 | 7.4311 | 2.71E-05 | 0.003 | 3.02 | -1.3022 | none       |
| CNN1     | 1.166 | 0.9314 | 7.431  | 2.71E-05 | 0.003 | 3.02 | -1.1719 | none       |
| LCTL     | 0.79  | 0.6023 | 7.4274 | 2.72E-05 | 0.003 | 3.02 | -1.2767 | none       |
| CCDC81   | 0.931 | 0.7442 | 7.4155 | 2.76E-05 | 0.003 | 3.01 | -1.4821 | none       |
| ZNF675   | 1.085 | 0.9315 | 7.411  | 2.77E-05 | 0.003 | 3    | -1.4849 | none       |
| FAM57B   | 0.909 | 0.7394 | 7.4008 | 2.80E-05 | 0.003 | 2.99 | -1.4349 | none       |
| MYCBPAP  | 1.339 | 1.1393 | 7.3992 | 2.81E-05 | 0.003 | 2.99 | -0.9533 | none       |
| TRAF3IP2 | 0.881 | 0.6924 | 7.3943 | 2.82E-05 | 0.003 | 2.98 | -1.4657 | none       |
| VSTM4    | 0.867 | 0.6884 | 7.3901 | 2.84E-05 | 0.003 | 2.98 | -1.4111 | none       |
| MTHFR    | 1.072 | 0.937  | 7.388  | 2.84E-05 | 0.003 | 2.98 | -1.387  | none       |
| ZNF429   | 1.237 | 1.0245 | 7.3854 | 2.85E-05 | 0.003 | 2.97 | -1.1082 | none       |
| VSNL1    | 1.008 | 0.8115 | 7.3775 | 2.88E-05 | 0.003 | 2.96 | -0.776  | none       |
| APLP1    | 0.985 | 0.7697 | 7.3662 | 2.92E-05 | 0.003 | 2.95 | -1.4646 | none       |
| HCAR1    | 0.803 | 0.611  | 7.3573 | 2.95E-05 | 0.003 | 2.94 | -1.3618 | none       |
| EPN2     | 1.048 | 0.8695 | 7.3561 | 2.95E-05 | 0.003 | 2.94 | -1.3613 | none       |
| CNTNAP3  | 1.194 | 0.9504 | 7.3496 | 2.97E-05 | 0.003 | 2.93 | -1.1895 | none       |
| DDB2     | 0.945 | 0.7518 | 7.3401 | 3.00E-05 | 0.003 | 2.92 | -1.5084 | none       |
| FXR2     | 1.087 | 0.9349 | 7.331  | 3.03E-05 | 0.003 | 2.91 | -1.3227 | none       |
| ZNF587   | 1.105 | 0.9212 | 7.3187 | 3.08E-05 | 0.003 | 2.9  | -1.1024 | none       |
| EXTL3    | 1.417 | 1.1896 | 7.3067 | 3.12E-05 | 0.003 | 2.89 | -1.0903 | none       |
| CD151    | 0.879 | 0.6809 | 7.3058 | 3.12E-05 | 0.003 | 2.89 | -1.3486 | none       |
| ZFHX3    | 1.031 | 0.8228 | 7.3025 | 3.13E-05 | 0.003 | 2.88 | -1.1732 | none       |
| LTBR     | 0.971 | 0.7706 | 7.2946 | 3.16E-05 | 0.003 | 2.87 | -1.4571 | none       |
| ZNF385A  | 1.527 | 1.2563 | 7.2926 | 3.17E-05 | 0.003 | 2.87 | -1.2842 | none       |
| PYGL     | 1.351 | 1.0972 | 7.2915 | 3.17E-05 | 0.003 | 2.87 | -1.4154 | none       |
| ATG16L2  | 0.971 | 0.7771 | 7.2902 | 3.18E-05 | 0.003 | 2.87 | -1.4546 | none       |
| ADGRV1   | 1.102 | 0.8497 | 7.2825 | 3.21E-05 | 0.003 | 2.86 | -1.2398 | none       |
| COMP     | 1.111 | 0.8898 | 7.2821 | 3.21E-05 | 0.003 | 2.86 | -1.2737 | none       |
| FHL2     | 1.054 | 0.7884 | 7.2745 | 3.24E-05 | 0.003 | 2.85 | -1.0978 | none       |

|          |       |        |        |          |       |      |         |            |
|----------|-------|--------|--------|----------|-------|------|---------|------------|
| CFAP74   | 0.952 | 0.8113 | 7.264  | 3.27E-05 | 0.003 | 2.84 | -1.3963 | none       |
| LRFN3    | 1.301 | 1.0267 | 7.2627 | 3.28E-05 | 0.003 | 2.84 | -1.2557 | none       |
| RAB21    | 1.044 | 0.8277 | 7.2539 | 3.31E-05 | 0.003 | 2.83 | -1.3376 | none       |
| NRP2     | 0.983 | 0.849  | 7.2535 | 3.31E-05 | 0.003 | 2.83 | -1.2237 | none       |
| GULP1    | 0.968 | 0.7609 | 7.2457 | 3.34E-05 | 0.003 | 2.82 | -1.4278 | none       |
| DACT3    | 0.882 | 0.7066 | 7.2409 | 3.36E-05 | 0.003 | 2.81 | -1.478  | none       |
| USP6NL   | 0.763 | 0.5673 | 7.2404 | 3.36E-05 | 0.003 | 2.81 | -1.0094 | none       |
| ZBTB8A   | 0.913 | 0.6941 | 7.2377 | 3.37E-05 | 0.003 | 2.81 | -1.6501 | OA-related |
| PDILT    | 1.016 | 0.816  | 7.2206 | 3.44E-05 | 0.003 | 2.79 | -0.7203 | none       |
| OR10G3   | 0.935 | 0.7231 | 7.2165 | 3.46E-05 | 0.003 | 2.79 | -1.479  | none       |
| AKT3     | 1.055 | 0.8574 | 7.2092 | 3.49E-05 | 0.003 | 2.78 | -1.4145 | none       |
| CREG2    | 1.042 | 0.7646 | 7.2088 | 3.49E-05 | 0.003 | 2.78 | -1.4861 | none       |
| SHROOM3  | 0.992 | 0.771  | 7.2072 | 3.49E-05 | 0.003 | 2.78 | -1.0102 | none       |
| CALCOCO2 | 0.989 | 0.7818 | 7.2037 | 3.51E-05 | 0.003 | 2.77 | -1.4122 | none       |
| FRS3     | 1.18  | 0.9984 | 7.2003 | 3.52E-05 | 0.003 | 2.77 | -1.0342 | none       |
| TMEM130  | 0.911 | 0.68   | 7.1993 | 3.53E-05 | 0.003 | 2.77 | -1.2679 | none       |
| SLC25A42 | 0.878 | 0.6607 | 7.1919 | 3.56E-05 | 0.003 | 2.76 | -1.2846 | none       |
| EARS2    | 1.051 | 0.8326 | 7.1833 | 3.59E-05 | 0.003 | 2.75 | -1.2395 | none       |
| EFHB     | 0.806 | 0.5707 | 7.1763 | 3.62E-05 | 0.003 | 2.74 | -0.0765 | none       |
| ITGB8    | 0.808 | 0.6553 | 7.1714 | 3.64E-05 | 0.003 | 2.74 | -1.4321 | none       |
| BAG1     | 1.06  | 0.9097 | 7.1665 | 3.66E-05 | 0.003 | 2.73 | -1.5433 | OA-related |
| ZNF724   | 1.421 | 1.2046 | 7.1591 | 3.69E-05 | 0.003 | 2.72 | -1.4151 | none       |
| ALS2CR12 | 1.421 | 1.0772 | 7.1565 | 3.70E-05 | 0.003 | 2.72 | -1.1278 | none       |
| PLA2G16  | 1.026 | 0.8101 | 7.1547 | 3.71E-05 | 0.003 | 2.72 | -1.3307 | none       |
| SHOX     | 0.876 | 0.6712 | 7.1489 | 3.74E-05 | 0.003 | 2.71 | -1.4807 | none       |
| TMEM186  | 0.992 | 0.7224 | 7.1388 | 3.78E-05 | 0.003 | 2.7  | -1.2425 | none       |
| DRAXIN   | 0.769 | 0.5781 | 7.1214 | 3.86E-05 | 0.003 | 2.68 | -1.5575 | OA-related |
| DIRAS2   | 1.003 | 0.787  | 7.1186 | 3.87E-05 | 0.003 | 2.68 | -1.3281 | none       |
| SPOP     | 0.814 | 0.6108 | 7.1118 | 3.90E-05 | 0.003 | 2.67 | -1.3626 | none       |
| ZNF157   | 0.819 | 0.6402 | 7.1113 | 3.90E-05 | 0.003 | 2.67 | -1.607  | OA-related |
| KBTBD2   | 0.856 | 0.6471 | 7.1081 | 3.92E-05 | 0.003 | 2.67 | -1.1636 | none       |
| PBX1     | 1.261 | 1.0668 | 7.1067 | 3.92E-05 | 0.003 | 2.67 | -1.2947 | none       |
| ECT2     | 1.266 | 1.0953 | 7.0957 | 3.97E-05 | 0.003 | 2.65 | -1.3234 | none       |
| RAB42    | 0.727 | 0.565  | 7.0935 | 3.98E-05 | 0.003 | 2.65 | -1.223  | none       |
| PHKA2    | 1.371 | 1.1702 | 7.0894 | 4.00E-05 | 0.003 | 2.65 | -1.3881 | none       |
| ELAVL2   | 0.721 | 0.5502 | 7.0877 | 4.01E-05 | 0.003 | 2.64 | -1.5121 | none       |
| PEX11A   | 1.015 | 0.7979 | 7.0873 | 4.01E-05 | 0.003 | 2.64 | -1.3601 | none       |
| PRDM16   | 1.318 | 1.0519 | 7.0797 | 4.05E-05 | 0.003 | 2.64 | -1.1733 | none       |
| SCIMP    | 1.002 | 0.7221 | 7.0751 | 4.07E-05 | 0.003 | 2.63 | -1.2383 | none       |
| DUOX1    | 1.216 | 0.9838 | 7.0736 | 4.08E-05 | 0.003 | 2.63 | -1.5537 | OA-related |



|          |       |        |        |          |       |      |         |            |
|----------|-------|--------|--------|----------|-------|------|---------|------------|
| FUT6     | 0.803 | 0.6211 | 7.0643 | 4.12E-05 | 0.003 | 2.62 | -1.3794 | none       |
| IVD      | 1.086 | 0.9338 | 7.0623 | 4.13E-05 | 0.003 | 2.62 | -1.1744 | none       |
| PXDN     | 1.207 | 0.9948 | 7.0615 | 4.14E-05 | 0.003 | 2.61 | -1.049  | none       |
| PIDD1    | 0.83  | 0.6603 | 7.059  | 4.15E-05 | 0.003 | 2.61 | -1.476  | none       |
| ZNF208   | 0.946 | 0.747  | 7.0575 | 4.15E-05 | 0.003 | 2.61 | -0.8984 | none       |
| TMEM52B  | 0.968 | 0.7764 | 7.0566 | 4.16E-05 | 0.003 | 2.61 | -1.4171 | none       |
| FAM76A   | 0.937 | 0.813  | 7.0395 | 4.24E-05 | 0.003 | 2.59 | -1.2741 | none       |
| ZNF677   | 0.866 | 0.6746 | 7.0349 | 4.26E-05 | 0.003 | 2.58 | -1.1011 | none       |
| TRIM72   | 0.807 | 0.6212 | 7.0323 | 4.28E-05 | 0.003 | 2.58 | -1.5898 | OA-related |
| MIPOL1   | 0.774 | 0.6008 | 7.0315 | 4.28E-05 | 0.003 | 2.58 | -1.5008 | none       |
| RHBDF2   | 1.037 | 0.8429 | 7.0281 | 4.30E-05 | 0.003 | 2.58 | -1.4289 | none       |
| ZNF596   | 0.902 | 0.7203 | 7.0187 | 4.35E-05 | 0.003 | 2.57 | -1.3104 | none       |
| SIRPB2   | 0.965 | 0.7255 | 7.018  | 4.35E-05 | 0.003 | 2.57 | -1.4614 | none       |
| PRICKLE2 | 0.831 | 0.632  | 7.0143 | 4.37E-05 | 0.003 | 2.56 | -1.5363 | OA-related |
| CDHR4    | 0.872 | 0.6407 | 7.012  | 4.38E-05 | 0.003 | 2.56 | -1.3867 | none       |
| STRA6    | 0.996 | 0.7744 | 7.0062 | 4.41E-05 | 0.003 | 2.55 | -1.3557 | none       |
| HPN      | 0.947 | 0.785  | 7.003  | 4.43E-05 | 0.003 | 2.55 | -0.4095 | none       |
| RIPPLY3  | 0.845 | 0.6406 | 6.9861 | 4.52E-05 | 0.003 | 2.53 | -1.1668 | none       |
| ENAM     | 1.02  | 0.7186 | 6.9856 | 4.52E-05 | 0.003 | 2.53 | -1.4022 | none       |
| CLNK     | 0.864 | 0.6501 | 6.9821 | 4.54E-05 | 0.003 | 2.52 | -1.478  | none       |
| SMARCAL1 | 1.32  | 1.0612 | 6.9816 | 4.54E-05 | 0.003 | 2.52 | -1.4487 | none       |
| SLC37A3  | 0.913 | 0.6688 | 6.9799 | 4.55E-05 | 0.003 | 2.52 | -1.2808 | none       |
| SLC11A1  | 1.093 | 0.8709 | 6.9778 | 4.56E-05 | 0.003 | 2.52 | -1.3026 | none       |
| SPACA6   | 1.109 | 0.9237 | 6.9728 | 4.59E-05 | 0.003 | 2.51 | -1.4119 | none       |
| ZNF347   | 1.082 | 0.8692 | 6.9725 | 4.59E-05 | 0.003 | 2.51 | -1.3599 | none       |
| C21ORF62 | 0.685 | 0.4782 | 6.9717 | 4.59E-05 | 0.003 | 2.51 | -1.4146 | none       |
| OR7D4    | 0.725 | 0.5357 | 6.9689 | 4.61E-05 | 0.003 | 2.51 | -1.5919 | OA-related |
| RHAG     | 1.358 | 1.1047 | 6.9677 | 4.61E-05 | 0.003 | 2.51 | -1.1003 | none       |
| PRSS27   | 0.961 | 0.7294 | 6.9671 | 4.62E-05 | 0.003 | 2.51 | -1.5108 | none       |
| MED11    | 0.879 | 0.6914 | 6.9588 | 4.66E-05 | 0.003 | 2.5  | -1.583  | OA-related |
| SLC36A2  | 0.791 | 0.5912 | 6.9548 | 4.68E-05 | 0.003 | 2.49 | -1.2975 | none       |
| ADGRG1   | 1.028 | 0.8522 | 6.9447 | 4.74E-05 | 0.003 | 2.48 | -0.9769 | none       |
| DNAJC14  | 1.063 | 0.8711 | 6.9444 | 4.74E-05 | 0.003 | 2.48 | -1.4088 | none       |
| SEPSECS  | 0.988 | 0.7993 | 6.9444 | 4.74E-05 | 0.003 | 2.48 | -1.3854 | none       |
| FBLIM1   | 0.813 | 0.629  | 6.9441 | 4.74E-05 | 0.003 | 2.48 | -1.4158 | none       |
| GIPR     | 0.926 | 0.7064 | 6.9424 | 4.75E-05 | 0.003 | 2.48 | -1.3904 | none       |
| MLXIPL   | 1.078 | 0.8241 | 6.9422 | 4.75E-05 | 0.003 | 2.48 | -1.2293 | none       |
| OR7D2    | 0.856 | 0.6234 | 6.94   | 4.77E-05 | 0.003 | 2.48 | -1.6061 | OA-related |
| BCAM     | 1.068 | 0.8571 | 6.9232 | 4.86E-05 | 0.003 | 2.46 | -1.2888 | none       |
| HECW2    | 0.973 | 0.7091 | 6.9198 | 4.88E-05 | 0.003 | 2.45 | -1.0035 | none       |

|           |       |        |        |          |       |      |         |            |
|-----------|-------|--------|--------|----------|-------|------|---------|------------|
| TINF2     | 0.91  | 0.6945 | 6.9191 | 4.89E-05 | 0.003 | 2.45 | -1.2268 | none       |
| ITSN1     | 1.223 | 1.0567 | 6.9174 | 4.90E-05 | 0.003 | 2.45 | -1.5201 | none       |
| TERF2     | 1.027 | 0.8628 | 6.9138 | 4.92E-05 | 0.003 | 2.45 | -1.6123 | OA-related |
| SMIM14    | 1.079 | 0.8443 | 6.9103 | 4.94E-05 | 0.003 | 2.44 | -1.2157 | none       |
| INTS8     | 1.088 | 0.8319 | 6.9035 | 4.98E-05 | 0.003 | 2.43 | -1.3425 | none       |
| ZNF707    | 1.28  | 0.921  | 6.9026 | 4.98E-05 | 0.003 | 2.43 | -1.33   | none       |
| ASAP3     | 0.84  | 0.6449 | 6.8897 | 5.06E-05 | 0.003 | 2.42 | -1.2558 | none       |
| ACACB     | 1.025 | 0.8515 | 6.8878 | 5.07E-05 | 0.003 | 2.42 | -1.4322 | none       |
| CDH13     | 1.11  | 0.9045 | 6.8853 | 5.09E-05 | 0.003 | 2.41 | -1.102  | none       |
| INSL6     | 1.061 | 0.8639 | 6.8847 | 5.09E-05 | 0.003 | 2.41 | -1.4657 | none       |
| ZNF70     | 0.802 | 0.6239 | 6.8807 | 5.11E-05 | 0.003 | 2.41 | -1.489  | none       |
| ZNF843    | 0.685 | 0.5055 | 6.8772 | 5.13E-05 | 0.003 | 2.4  | -1.5126 | none       |
| CLDN4     | 1.065 | 0.8489 | 6.876  | 5.14E-05 | 0.003 | 2.4  | -1.1286 | none       |
| CYSLTR1   | 0.827 | 0.6313 | 6.8752 | 5.15E-05 | 0.003 | 2.4  | -1.3816 | none       |
| WDR93     | 0.962 | 0.7513 | 6.8697 | 5.18E-05 | 0.003 | 2.4  | -1.5775 | OA-related |
| ZBTB8B    | 0.764 | 0.5642 | 6.8631 | 5.22E-05 | 0.003 | 2.39 | -1.582  | OA-related |
| CNR2      | 0.794 | 0.5848 | 6.86   | 5.24E-05 | 0.003 | 2.38 | -1.5638 | OA-related |
| ABCC9     | 0.768 | 0.6235 | 6.8491 | 5.31E-05 | 0.003 | 2.37 | -1.4869 | none       |
| ZNF605    | 1.096 | 0.916  | 6.84   | 5.37E-05 | 0.003 | 2.36 | -1.2209 | none       |
| MAGI2     | 1.096 | 0.8767 | 6.8395 | 5.37E-05 | 0.003 | 2.36 | -1.431  | none       |
| HIST3H2BI | 0.723 | 0.52   | 6.8394 | 5.37E-05 | 0.003 | 2.36 | -1.5189 | none       |
| C11ORF80  | 0.889 | 0.6296 | 6.8329 | 5.41E-05 | 0.003 | 2.35 | -1.4317 | none       |
| ZNF212    | 1.223 | 1.0128 | 6.8308 | 5.43E-05 | 0.003 | 2.35 | -1.1066 | none       |
| FAM122C   | 1.062 | 0.7895 | 6.8291 | 5.44E-05 | 0.003 | 2.35 | -1.2669 | none       |
| IAPP      | 0.771 | 0.5637 | 6.8255 | 5.46E-05 | 0.003 | 2.34 | -1.2568 | none       |
| TPD52     | 0.923 | 0.7668 | 6.8232 | 5.48E-05 | 0.003 | 2.34 | -1.2307 | none       |
| ZNF320    | 1.267 | 1.0082 | 6.8229 | 5.48E-05 | 0.003 | 2.34 | -1.2944 | none       |
| FPR2      | 1.348 | 1.0638 | 6.8189 | 5.50E-05 | 0.003 | 2.34 | -1.3117 | none       |
| POMT2     | 0.983 | 0.7863 | 6.8143 | 5.53E-05 | 0.003 | 2.33 | -1.2079 | none       |
| EYS       | 0.727 | 0.5468 | 6.8113 | 5.55E-05 | 0.003 | 2.33 | -1.3626 | none       |
| BHMT2     | 0.803 | 0.6197 | 6.8074 | 5.58E-05 | 0.003 | 2.32 | -1.5222 | none       |
| MS4A10    | 0.967 | 0.715  | 6.8021 | 5.61E-05 | 0.003 | 2.32 | -1.4934 | none       |
| LIAS      | 0.745 | 0.6003 | 6.801  | 5.62E-05 | 0.003 | 2.32 | -1.4264 | none       |
| CATIP     | 0.993 | 0.8054 | 6.7959 | 5.66E-05 | 0.003 | 2.31 | -1.6346 | OA-related |
| C12ORF76  | 0.993 | 0.7468 | 6.7949 | 5.66E-05 | 0.003 | 2.31 | -1.3753 | none       |
| PDE4C     | 0.847 | 0.6727 | 6.7944 | 5.67E-05 | 0.003 | 2.31 | -1.5043 | none       |
| WDR31     | 0.877 | 0.6955 | 6.7934 | 5.67E-05 | 0.003 | 2.31 | -1.5638 | OA-related |
| TAPT1     | 0.983 | 0.7414 | 6.7903 | 5.69E-05 | 0.003 | 2.3  | -1.2938 | none       |
| KLHDC1    | 0.824 | 0.6804 | 6.7818 | 5.75E-05 | 0.004 | 2.29 | -0.4664 | none       |
| KLK10     | 0.895 | 0.705  | 6.771  | 5.83E-05 | 0.004 | 2.28 | -1.5028 | none       |

|           |       |        |        |          |       |      |         |            |
|-----------|-------|--------|--------|----------|-------|------|---------|------------|
| LTBP4     | 0.676 | 0.4863 | 6.7709 | 5.83E-05 | 0.004 | 2.28 | -1.2657 | none       |
| SIGLEC10  | 0.844 | 0.6801 | 6.7691 | 5.84E-05 | 0.004 | 2.28 | -1.3887 | none       |
| ZNF331    | 1.179 | 0.9618 | 6.7545 | 5.94E-05 | 0.004 | 2.26 | -1.5768 | OA-related |
| PLA2G15   | 0.833 | 0.6622 | 6.7516 | 5.97E-05 | 0.004 | 2.26 | -1.4727 | none       |
| FAM160B2  | 0.959 | 0.7857 | 6.7512 | 5.97E-05 | 0.004 | 2.26 | -1.4453 | none       |
| RSPH10B2  | 0.827 | 0.6649 | 6.7468 | 6.00E-05 | 0.004 | 2.25 | -1.0495 | none       |
| GTF2E2    | 0.742 | 0.5359 | 6.7312 | 6.11E-05 | 0.004 | 2.23 | -1.4313 | none       |
| ABCB11    | 1.238 | 1.0125 | 6.7304 | 6.12E-05 | 0.004 | 2.23 | -1.1552 | none       |
| FAXDC2    | 1.122 | 0.9082 | 6.7302 | 6.12E-05 | 0.004 | 2.23 | -1.0366 | none       |
| AFMID     | 0.848 | 0.6711 | 6.7278 | 6.14E-05 | 0.004 | 2.23 | -1.454  | none       |
| TNFRSF10I | 1.02  | 0.8448 | 6.7242 | 6.16E-05 | 0.004 | 2.23 | -1.4262 | none       |
| AKR1D1    | 0.764 | 0.546  | 6.7127 | 6.25E-05 | 0.004 | 2.21 | -1.2249 | none       |
| CFAP54    | 0.691 | 0.5175 | 6.7125 | 6.25E-05 | 0.004 | 2.21 | -1.4341 | none       |
| ZNF546    | 1.207 | 0.9615 | 6.7107 | 6.27E-05 | 0.004 | 2.21 | -1.3894 | none       |
| GALC      | 1.136 | 0.8385 | 6.7099 | 6.27E-05 | 0.004 | 2.21 | -1.0924 | none       |
| SCRG1     | 0.747 | 0.5667 | 6.7026 | 6.33E-05 | 0.004 | 2.2  | -1.4794 | none       |
| KREMEN1   | 0.644 | 0.4362 | 6.7003 | 6.35E-05 | 0.004 | 2.2  | -1.0774 | none       |
| PHF7      | 1.061 | 0.8291 | 6.6909 | 6.42E-05 | 0.004 | 2.19 | -1.4375 | none       |
| ATCAY     | 0.93  | 0.7219 | 6.6903 | 6.42E-05 | 0.004 | 2.19 | -1.3192 | none       |
| HIF1A     | 1.055 | 0.8703 | 6.6888 | 6.43E-05 | 0.004 | 2.18 | -1.4768 | none       |
| MAGT1     | 0.712 | 0.5343 | 6.6882 | 6.44E-05 | 0.004 | 2.18 | -1.5347 | OA-related |
| CACNA1A   | 0.795 | 0.5946 | 6.6868 | 6.45E-05 | 0.004 | 2.18 | -1.4698 | none       |
| ITGB3BP   | 1.192 | 0.8384 | 6.6862 | 6.45E-05 | 0.004 | 2.18 | -1.0735 | none       |
| SAMD12    | 0.755 | 0.6198 | 6.6782 | 6.52E-05 | 0.004 | 2.17 | -1.4754 | none       |
| DENND2A   | 0.795 | 0.6042 | 6.6771 | 6.52E-05 | 0.004 | 2.17 | -1.4196 | none       |
| PTK2      | 0.997 | 0.8105 | 6.6767 | 6.53E-05 | 0.004 | 2.17 | -1.2597 | none       |
| GSK3B     | 1.177 | 1.0025 | 6.6723 | 6.56E-05 | 0.004 | 2.16 | -1.4445 | none       |
| SYTL4     | 0.705 | 0.5206 | 6.6717 | 6.57E-05 | 0.004 | 2.16 | -1.6209 | OA-related |
| NSD1      | 1.085 | 0.9124 | 6.6703 | 6.58E-05 | 0.004 | 2.16 | -1.3504 | none       |
| SMIM22    | 0.921 | 0.7883 | 6.6699 | 6.58E-05 | 0.004 | 2.16 | -1.3285 | none       |
| PNLIPRP1  | 1.057 | 0.8432 | 6.6685 | 6.59E-05 | 0.004 | 2.16 | -1.0293 | none       |
| CFHR1     | 0.835 | 0.6517 | 6.6594 | 6.67E-05 | 0.004 | 2.15 | -0.8412 | none       |
| THAP9     | 1.169 | 0.9355 | 6.6557 | 6.70E-05 | 0.004 | 2.15 | -1.2737 | none       |
| SSTR2     | 0.753 | 0.6033 | 6.6528 | 6.72E-05 | 0.004 | 2.14 | -1.5614 | OA-related |
| SETDB2    | 1.237 | 1.0408 | 6.6513 | 6.73E-05 | 0.004 | 2.14 | -1.4691 | none       |
| P2RX3     | 0.792 | 0.5653 | 6.6484 | 6.76E-05 | 0.004 | 2.14 | -1.0819 | none       |
| RSPH10B   | 0.788 | 0.6299 | 6.6466 | 6.77E-05 | 0.004 | 2.13 | -1.0034 | none       |
| PKNOX1    | 0.875 | 0.7425 | 6.6434 | 6.80E-05 | 0.004 | 2.13 | -1.5141 | none       |
| PTCD3     | 0.905 | 0.6993 | 6.6369 | 6.85E-05 | 0.004 | 2.12 | -1.4476 | none       |
| SAMD4B    | 1.211 | 1.0625 | 6.6337 | 6.88E-05 | 0.004 | 2.12 | -1.2326 | none       |

|          |       |        |        |          |       |      |         |            |
|----------|-------|--------|--------|----------|-------|------|---------|------------|
| SH3GL1   | 1.277 | 1.0816 | 6.6321 | 6.89E-05 | 0.004 | 2.12 | -1.4637 | none       |
| SYT5     | 0.662 | 0.4867 | 6.6315 | 6.90E-05 | 0.004 | 2.12 | -1.425  | none       |
| PLIN5    | 0.828 | 0.6078 | 6.6295 | 6.91E-05 | 0.004 | 2.11 | -1.4117 | none       |
| CNTN2    | 0.742 | 0.5526 | 6.6291 | 6.92E-05 | 0.004 | 2.11 | -1.4796 | none       |
| TARSL2   | 1.177 | 1.0411 | 6.6276 | 6.93E-05 | 0.004 | 2.11 | -1.4831 | none       |
| ERMAP    | 0.824 | 0.6229 | 6.6255 | 6.95E-05 | 0.004 | 2.11 | -1.4355 | none       |
| PGBD4    | 0.767 | 0.5929 | 6.6242 | 6.96E-05 | 0.004 | 2.11 | -1.5983 | OA-related |
| ZNF506   | 1.004 | 0.8154 | 6.6191 | 7.00E-05 | 0.004 | 2.1  | -1.1632 | none       |
| STEAP2   | 0.713 | 0.5518 | 6.6126 | 7.06E-05 | 0.004 | 2.09 | -1.5926 | OA-related |
| SLC31A1  | 0.936 | 0.7012 | 6.6095 | 7.08E-05 | 0.004 | 2.09 | -1.3698 | none       |
| C5AR1    | 0.892 | 0.6821 | 6.608  | 7.10E-05 | 0.004 | 2.09 | -1.2894 | none       |
| MGST1    | 1.272 | 1.0655 | 6.6039 | 7.13E-05 | 0.004 | 2.08 | -1.0187 | none       |
| C1ORF109 | 0.784 | 0.6236 | 6.6019 | 7.15E-05 | 0.004 | 2.08 | -1.5782 | OA-related |
| OAF      | 0.937 | 0.6958 | 6.6009 | 7.16E-05 | 0.004 | 2.08 | -1.3039 | none       |
| ST18     | 1.149 | 0.8635 | 6.5985 | 7.18E-05 | 0.004 | 2.08 | -0.9963 | none       |
| SENP5    | 1.079 | 0.906  | 6.5985 | 7.18E-05 | 0.004 | 2.08 | -1.4391 | none       |
| LPO      | 0.798 | 0.6079 | 6.5966 | 7.20E-05 | 0.004 | 2.08 | -1.3979 | none       |
| KCNK6    | 1.181 | 1.0195 | 6.5957 | 7.20E-05 | 0.004 | 2.07 | -1.3135 | none       |
| NUGGC    | 0.934 | 0.7431 | 6.59   | 7.25E-05 | 0.004 | 2.07 | -1.557  | OA-related |
| CENPBD1  | 0.771 | 0.6337 | 6.5874 | 7.28E-05 | 0.004 | 2.06 | -1.4958 | none       |
| ZNF606   | 1.147 | 0.93   | 6.5869 | 7.28E-05 | 0.004 | 2.06 | -1.0741 | none       |
| PPEF2    | 1.453 | 1.3053 | 6.5795 | 7.35E-05 | 0.004 | 2.05 | -0.3786 | none       |
| FAM9C    | 0.716 | 0.5107 | 6.5699 | 7.43E-05 | 0.004 | 2.04 | -1.4068 | none       |
| WDR90    | 1.124 | 0.9084 | 6.5699 | 7.43E-05 | 0.004 | 2.04 | -1.2777 | none       |
| BRDT     | 0.755 | 0.5321 | 6.5688 | 7.44E-05 | 0.004 | 2.04 | -0.6098 | none       |
| CRYZL1   | 0.943 | 0.7005 | 6.5685 | 7.45E-05 | 0.004 | 2.04 | -1.2849 | none       |
| ADAMTSL1 | 0.877 | 0.7177 | 6.5605 | 7.52E-05 | 0.004 | 2.03 | -1.3888 | none       |
| FBXO36   | 1.14  | 0.905  | 6.5589 | 7.53E-05 | 0.004 | 2.03 | -1.6142 | OA-related |
| MARVELD1 | 0.757 | 0.6065 | 6.5486 | 7.63E-05 | 0.004 | 2.02 | -1.5016 | none       |
| TMC8     | 0.965 | 0.8603 | 6.5484 | 7.63E-05 | 0.004 | 2.02 | -1.5625 | OA-related |
| CC2D2A   | 1.066 | 0.8099 | 6.5482 | 7.63E-05 | 0.004 | 2.02 | -1.469  | none       |
| CPT1C    | 0.933 | 0.6997 | 6.5464 | 7.65E-05 | 0.004 | 2.01 | -1.2726 | none       |
| C1ORF216 | 0.874 | 0.6695 | 6.5378 | 7.73E-05 | 0.004 | 2    | -1.3831 | none       |
| 9-Mar    | 0.939 | 0.7518 | 6.536  | 7.75E-05 | 0.004 | 2    | -0.8534 | none       |
| CASC10   | 0.671 | 0.4852 | 6.5308 | 7.80E-05 | 0.004 | 2    | -1.4862 | none       |
| ZNF561   | 0.892 | 0.6936 | 6.5285 | 7.82E-05 | 0.004 | 1.99 | -0.9881 | none       |
| CEP89    | 0.986 | 0.8805 | 6.5284 | 7.82E-05 | 0.004 | 1.99 | -1.3662 | none       |
| PLEKHG1  | 0.956 | 0.7695 | 6.5284 | 7.82E-05 | 0.004 | 1.99 | -1.5689 | OA-related |
| MS4A4E   | 0.818 | 0.6783 | 6.5279 | 7.83E-05 | 0.004 | 1.99 | -0.677  | none       |
| KRT8     | 1.012 | 0.7828 | 6.5254 | 7.85E-05 | 0.004 | 1.99 | -1.3195 | none       |

|           |       |        |        |          |       |      |         |            |
|-----------|-------|--------|--------|----------|-------|------|---------|------------|
| RPUSD4    | 0.904 | 0.6625 | 6.522  | 7.88E-05 | 0.004 | 1.99 | -1.286  | none       |
| TMEM210   | 0.767 | 0.5902 | 6.521  | 7.89E-05 | 0.004 | 1.98 | -1.1865 | none       |
| NMNAT1    | 1.181 | 1.0154 | 6.5127 | 7.98E-05 | 0.004 | 1.97 | -1.4172 | none       |
| FBXO44    | 1.028 | 0.8194 | 6.5047 | 8.05E-05 | 0.004 | 1.96 | -1.376  | none       |
| ARIH2OS   | 1.037 | 0.8199 | 6.5003 | 8.10E-05 | 0.004 | 1.96 | -1.469  | none       |
| FBXO24    | 0.925 | 0.7229 | 6.4911 | 8.19E-05 | 0.004 | 1.95 | -1.0598 | none       |
| TBXA2R    | 0.797 | 0.5126 | 6.4803 | 8.30E-05 | 0.004 | 1.94 | -1.1017 | none       |
| TRIM52    | 1.012 | 0.8249 | 6.4801 | 8.30E-05 | 0.004 | 1.93 | -1.0888 | none       |
| LINC00672 | 0.774 | 0.5957 | 6.4783 | 8.32E-05 | 0.004 | 1.93 | -1.6608 | OA-related |
| ERC1      | 1.235 | 1.1033 | 6.4726 | 8.38E-05 | 0.004 | 1.93 | -1.358  | none       |
| TSPAN10   | 1.061 | 0.8536 | 6.47   | 8.41E-05 | 0.004 | 1.92 | -1.3735 | none       |
| PDLIM5    | 1.145 | 0.8675 | 6.4684 | 8.42E-05 | 0.004 | 1.92 | -1.2604 | none       |
| OR10H5    | 0.793 | 0.5939 | 6.466  | 8.45E-05 | 0.004 | 1.92 | -1.5327 | OA-related |
| CHST6     | 0.669 | 0.5097 | 6.4627 | 8.48E-05 | 0.004 | 1.91 | -1.5298 | none       |
| MKNK1     | 0.79  | 0.6183 | 6.4611 | 8.50E-05 | 0.004 | 1.91 | -1.461  | none       |
| UTP4      | 0.693 | 0.5097 | 6.4605 | 8.51E-05 | 0.004 | 1.91 | -1.3778 | none       |
| NIM1K     | 0.842 | 0.6082 | 6.4563 | 8.55E-05 | 0.004 | 1.91 | -0.8644 | none       |
| SDHAF4    | 0.862 | 0.6103 | 6.4545 | 8.57E-05 | 0.004 | 1.9  | -1.3055 | none       |
| WNT10A    | 0.995 | 0.7095 | 6.4529 | 8.59E-05 | 0.004 | 1.9  | -0.9893 | none       |
| HLCS      | 0.841 | 0.6692 | 6.4497 | 8.62E-05 | 0.004 | 1.9  | -1.4753 | none       |
| MYOM1     | 0.687 | 0.4989 | 6.4493 | 8.62E-05 | 0.004 | 1.9  | -1.2341 | none       |
| SPG7      | 0.912 | 0.7633 | 6.4489 | 8.63E-05 | 0.004 | 1.9  | -1.4984 | none       |
| HPS5      | 0.963 | 0.7125 | 6.4479 | 8.64E-05 | 0.004 | 1.9  | -1.3857 | none       |
| SH2D3A    | 0.756 | 0.529  | 6.4358 | 8.77E-05 | 0.004 | 1.88 | -1.4658 | none       |
| RHBDL2    | 0.754 | 0.5807 | 6.4348 | 8.78E-05 | 0.004 | 1.88 | -1.3506 | none       |
| MYZAP     | 0.806 | 0.6185 | 6.43   | 8.83E-05 | 0.004 | 1.87 | -0.0924 | none       |
| TRPV1     | 0.81  | 0.6688 | 6.4286 | 8.85E-05 | 0.004 | 1.87 | -1.4086 | none       |
| POMGNT1   | 1.08  | 0.8751 | 6.4275 | 8.86E-05 | 0.004 | 1.87 | -1.0738 | none       |
| ARID3A    | 0.945 | 0.8178 | 6.4271 | 8.86E-05 | 0.004 | 1.87 | -1.4006 | none       |
| FARP1     | 0.989 | 0.7873 | 6.4268 | 8.87E-05 | 0.004 | 1.87 | -1.2305 | none       |
| AQP6      | 0.877 | 0.6741 | 6.4256 | 8.88E-05 | 0.004 | 1.87 | -1.3718 | none       |
| THAP6     | 0.933 | 0.7472 | 6.424  | 8.90E-05 | 0.004 | 1.87 | -1.4833 | none       |
| TATDN3    | 0.832 | 0.6004 | 6.423  | 8.91E-05 | 0.004 | 1.87 | -1.2657 | none       |
| IZUMO2    | 1.035 | 0.7955 | 6.416  | 8.99E-05 | 0.004 | 1.86 | -1.309  | none       |
| OR51M1    | 0.942 | 0.7044 | 6.4153 | 9.00E-05 | 0.004 | 1.86 | -1.4953 | none       |
| LIPT1     | 0.906 | 0.6806 | 6.4067 | 9.09E-05 | 0.004 | 1.85 | -1.168  | none       |
| MAGEA10   | 0.892 | 0.6766 | 6.4067 | 9.09E-05 | 0.004 | 1.85 | -1.5667 | OA-related |
| HOOK2     | 1.206 | 0.9443 | 6.4062 | 9.10E-05 | 0.004 | 1.85 | -1.1205 | none       |
| ZNF793    | 0.942 | 0.7722 | 6.4049 | 9.11E-05 | 0.004 | 1.84 | -1.535  | OA-related |
| DAG1      | 1.277 | 1.059  | 6.3995 | 9.17E-05 | 0.004 | 1.84 | -1.277  | none       |

|          |       |        |        |          |       |      |         |            |
|----------|-------|--------|--------|----------|-------|------|---------|------------|
| RPAP1    | 1.12  | 0.9998 | 6.3985 | 9.19E-05 | 0.004 | 1.84 | -1.2352 | none       |
| SPIRE2   | 0.759 | 0.5678 | 6.3982 | 9.19E-05 | 0.004 | 1.84 | -1.534  | OA-related |
| NDRG2    | 1.029 | 0.7865 | 6.3966 | 9.21E-05 | 0.004 | 1.83 | -0.8324 | none       |
| PNMA2    | 0.794 | 0.5964 | 6.3959 | 9.22E-05 | 0.004 | 1.83 | -1.5285 | none       |
| PKIB     | 1.164 | 0.9241 | 6.3937 | 9.24E-05 | 0.004 | 1.83 | -1.3311 | none       |
| RRP12    | 0.993 | 0.8426 | 6.3913 | 9.27E-05 | 0.004 | 1.83 | -1.5296 | none       |
| ZBTB11   | 1.124 | 0.9975 | 6.39   | 9.28E-05 | 0.004 | 1.83 | -1.5038 | none       |
| FGD2     | 0.87  | 0.6297 | 6.3868 | 9.32E-05 | 0.004 | 1.82 | -1.2332 | none       |
| HINFP    | 0.897 | 0.6778 | 6.3844 | 9.35E-05 | 0.004 | 1.82 | -1.4563 | none       |
| CCNB1IP1 | 0.791 | 0.613  | 6.3836 | 9.36E-05 | 0.004 | 1.82 | -1.4535 | none       |
| MMP11    | 0.847 | 0.6753 | 6.3832 | 9.36E-05 | 0.004 | 1.82 | -1.0251 | none       |
| VGLL4    | 0.862 | 0.6934 | 6.3775 | 9.43E-05 | 0.004 | 1.81 | -1.3386 | none       |
| ZNF383   | 0.822 | 0.5997 | 6.3744 | 9.47E-05 | 0.004 | 1.81 | -1.2663 | none       |
| EML1     | 0.833 | 0.6512 | 6.3739 | 9.47E-05 | 0.004 | 1.81 | -1.1925 | none       |
| ZNF532   | 1.108 | 0.8917 | 6.3721 | 9.49E-05 | 0.004 | 1.8  | -1.3274 | none       |
| RNF185   | 0.74  | 0.5426 | 6.367  | 9.55E-05 | 0.004 | 1.8  | -1.3295 | none       |
| RAB29    | 0.694 | 0.5181 | 6.3609 | 9.63E-05 | 0.004 | 1.79 | -1.4324 | none       |
| OTUD4    | 1.214 | 1.004  | 6.3607 | 9.63E-05 | 0.004 | 1.79 | -1.5174 | none       |
| C1ORF167 | 0.889 | 0.6578 | 6.3551 | 9.70E-05 | 0.004 | 1.78 | -1.4904 | none       |
| ABHD11   | 0.756 | 0.6191 | 6.3547 | 9.70E-05 | 0.004 | 1.78 | -1.35   | none       |
| AGXT     | 0.617 | 0.4518 | 6.35   | 9.76E-05 | 0.004 | 1.78 | -1.2105 | none       |
| SYNE2    | 1.034 | 0.937  | 6.3497 | 9.76E-05 | 0.004 | 1.78 | -1.0472 | none       |
| KANK2    | 1.524 | 1.2351 | 6.3491 | 9.77E-05 | 0.004 | 1.78 | -1.1046 | none       |
| 2-Sep    | 0.605 | 0.434  | 6.3471 | 9.79E-05 | 0.004 | 1.77 | -0.7535 | none       |
| PIH1D3   | 0.579 | 0.377  | 6.3433 | 9.84E-05 | 0.004 | 1.77 | -0.7294 | none       |
| TMEM266  | 0.897 | 0.7024 | 6.3395 | 9.89E-05 | 0.004 | 1.76 | -1.4405 | none       |
| KCNH6    | 0.703 | 0.5292 | 6.3352 | 9.94E-05 | 0.004 | 1.76 | -1.5239 | none       |
| COLEC11  | 1.036 | 0.8625 | 6.3335 | 9.96E-05 | 0.004 | 1.76 | -1.3847 | none       |
| CTRC     | 0.673 | 0.5033 | 6.3324 | 9.98E-05 | 0.004 | 1.75 | -1.6169 | OA-related |
| GYPA     | 0.976 | 0.7895 | 6.3307 | 1.00E-04 | 0.004 | 1.75 | -1.0496 | none       |
| SWSAP1   | 0.83  | 0.6527 | 6.3298 | 1.00E-04 | 0.004 | 1.75 | -1.1127 | none       |
| C1ORF210 | 0.738 | 0.5547 | 6.3292 | 1.00E-04 | 0.004 | 1.75 | -1.4903 | none       |
| FER1L5   | 0.72  | 0.5767 | 6.3289 | 1.00E-04 | 0.004 | 1.75 | -1.5037 | none       |
| OR4D9    | 0.813 | 0.616  | 6.3289 | 1.00E-04 | 0.004 | 1.75 | -1.4348 | none       |
| DUSP3    | 0.878 | 0.6915 | 6.3232 | 1.01E-04 | 0.004 | 1.74 | -1.2918 | none       |
| SLC15A1  | 0.886 | 0.676  | 6.323  | 1.01E-04 | 0.004 | 1.74 | -1.4587 | none       |
| HMGA2    | 0.929 | 0.723  | 6.3227 | 1.01E-04 | 0.004 | 1.74 | -1.1553 | none       |
| C10ORF82 | 0.922 | 0.7164 | 6.3193 | 1.01E-04 | 0.004 | 1.74 | -1.3662 | none       |
| DST      | 1.27  | 1.075  | 6.3166 | 1.02E-04 | 0.004 | 1.74 | -0.8763 | none       |
| XYLT2    | 1.27  | 1.1169 | 6.3164 | 1.02E-04 | 0.004 | 1.73 | -1.3351 | none       |

|           |       |        |        |          |       |      |         |            |
|-----------|-------|--------|--------|----------|-------|------|---------|------------|
| ANO10     | 0.961 | 0.7157 | 6.3121 | 1.02E-04 | 0.004 | 1.73 | -1.3411 | none       |
| TNFSF15   | 0.636 | 0.4726 | 6.3106 | 1.03E-04 | 0.004 | 1.73 | -1.4941 | none       |
| MFSD4B    | 0.673 | 0.5358 | 6.3096 | 1.03E-04 | 0.004 | 1.73 | -1.5319 | OA-related |
| ARIH2     | 0.722 | 0.5329 | 6.3069 | 1.03E-04 | 0.004 | 1.72 | -1.2724 | none       |
| LAT2      | 0.772 | 0.6049 | 6.301  | 1.04E-04 | 0.004 | 1.72 | -1.6596 | OA-related |
| LRRC36    | 1.085 | 0.8402 | 6.2995 | 1.04E-04 | 0.004 | 1.71 | -0.738  | none       |
| NEK5      | 0.678 | 0.5274 | 6.2964 | 1.04E-04 | 0.004 | 1.71 | -1.4636 | none       |
| ASTN2     | 0.718 | 0.5595 | 6.2947 | 1.05E-04 | 0.004 | 1.71 | -1.3724 | none       |
| WDR62     | 1.133 | 0.9779 | 6.2861 | 1.06E-04 | 0.004 | 1.7  | -1.4181 | none       |
| KCNA7     | 0.594 | 0.4403 | 6.2856 | 1.06E-04 | 0.004 | 1.7  | -1.3132 | none       |
| ZNF16     | 0.844 | 0.6814 | 6.2839 | 1.06E-04 | 0.004 | 1.69 | -1.5874 | OA-related |
| PRKAG2    | 0.666 | 0.5054 | 6.2812 | 1.06E-04 | 0.004 | 1.69 | -1.012  | none       |
| EXD1      | 0.649 | 0.4505 | 6.2797 | 1.07E-04 | 0.004 | 1.69 | -1.3354 | none       |
| GREB1     | 0.791 | 0.6443 | 6.2791 | 1.07E-04 | 0.004 | 1.69 | -0.8371 | none       |
| ZNF615    | 1.538 | 1.2896 | 6.2775 | 1.07E-04 | 0.004 | 1.69 | -1.2649 | none       |
| TXNRD2    | 0.708 | 0.5959 | 6.2739 | 1.07E-04 | 0.004 | 1.68 | -1.2623 | none       |
| PDE11A    | 0.617 | 0.4608 | 6.2731 | 1.07E-04 | 0.004 | 1.68 | -1.4313 | none       |
| DAGLB     | 0.854 | 0.6799 | 6.2697 | 1.08E-04 | 0.004 | 1.68 | -1.1634 | none       |
| SIGLEC8   | 0.658 | 0.5102 | 6.2656 | 1.09E-04 | 0.004 | 1.67 | -1.487  | none       |
| ZNF566    | 0.823 | 0.5957 | 6.2637 | 1.09E-04 | 0.004 | 1.67 | -1.2652 | none       |
| SLC47A1   | 0.849 | 0.6523 | 6.2632 | 1.09E-04 | 0.004 | 1.67 | -1.196  | none       |
| FUT1      | 0.768 | 0.6384 | 6.2612 | 1.09E-04 | 0.004 | 1.67 | -1.0512 | none       |
| CDH1      | 0.803 | 0.5749 | 6.2577 | 1.10E-04 | 0.004 | 1.66 | -1.4178 | none       |
| ACBD7     | 0.973 | 0.7639 | 6.2536 | 1.10E-04 | 0.004 | 1.66 | -1.5428 | OA-related |
| CCDC171   | 1.031 | 0.9048 | 6.2528 | 1.10E-04 | 0.004 | 1.66 | -1.2913 | none       |
| PDHX      | 0.869 | 0.6639 | 6.2438 | 1.12E-04 | 0.004 | 1.64 | -1.3401 | none       |
| PYGM      | 0.892 | 0.7366 | 6.2437 | 1.12E-04 | 0.004 | 1.64 | -1.3693 | none       |
| TYRO3     | 0.948 | 0.7631 | 6.2431 | 1.12E-04 | 0.004 | 1.64 | -1.4496 | none       |
| PTPRK     | 1.104 | 0.8244 | 6.2414 | 1.12E-04 | 0.004 | 1.64 | -1.4638 | none       |
| WDR41     | 0.784 | 0.553  | 6.2405 | 1.12E-04 | 0.004 | 1.64 | -0.8761 | none       |
| PLEKHH2   | 1.147 | 0.92   | 6.2397 | 1.12E-04 | 0.004 | 1.64 | -1.3739 | none       |
| DNAJA3    | 0.712 | 0.567  | 6.2357 | 1.13E-04 | 0.004 | 1.63 | -1.4699 | none       |
| SLC1A6    | 0.722 | 0.5746 | 6.2355 | 1.13E-04 | 0.004 | 1.63 | -1.5309 | none       |
| TCF4      | 1.035 | 0.7666 | 6.2335 | 1.13E-04 | 0.004 | 1.63 | -0.8872 | none       |
| CRLF3     | 0.907 | 0.7052 | 6.2331 | 1.13E-04 | 0.004 | 1.63 | -1.2502 | none       |
| TNFRSF13U | 0.78  | 0.5886 | 6.2327 | 1.13E-04 | 0.004 | 1.63 | -1.6437 | OA-related |
| OR7G2     | 0.665 | 0.4916 | 6.2312 | 1.13E-04 | 0.004 | 1.63 | -1.5681 | OA-related |
| DZANK1    | 0.832 | 0.6912 | 6.2278 | 1.14E-04 | 0.004 | 1.62 | -1.4511 | none       |
| OPHN1     | 0.784 | 0.6464 | 6.2262 | 1.14E-04 | 0.004 | 1.62 | -1.5077 | none       |
| ABCB9     | 0.869 | 0.7111 | 6.2239 | 1.14E-04 | 0.004 | 1.62 | -1.5091 | none       |

|          |       |        |        |          |       |      |         |            |
|----------|-------|--------|--------|----------|-------|------|---------|------------|
| ZNF141   | 0.931 | 0.7211 | 6.2231 | 1.15E-04 | 0.004 | 1.62 | -1.2787 | none       |
| TAF8     | 0.882 | 0.7548 | 6.2218 | 1.15E-04 | 0.004 | 1.62 | -1.3802 | none       |
| ARHGAP8  | 1.012 | 0.8218 | 6.2185 | 1.15E-04 | 0.004 | 1.61 | -1.4548 | none       |
| DAND5    | 0.864 | 0.6461 | 6.2184 | 1.15E-04 | 0.004 | 1.61 | -1.3853 | none       |
| GBA2     | 1.077 | 0.9097 | 6.2166 | 1.15E-04 | 0.004 | 1.61 | -1.1126 | none       |
| ABCC10   | 0.959 | 0.7999 | 6.216  | 1.16E-04 | 0.004 | 1.61 | -1.468  | none       |
| AIPL1    | 0.632 | 0.4733 | 6.2116 | 1.16E-04 | 0.004 | 1.6  | -1.0886 | none       |
| GCM1     | 0.728 | 0.5143 | 6.2097 | 1.16E-04 | 0.004 | 1.6  | -1.3713 | none       |
| SLC26A8  | 0.711 | 0.5385 | 6.2018 | 1.18E-04 | 0.004 | 1.59 | -1.368  | none       |
| OR111    | 0.717 | 0.5347 | 6.2016 | 1.18E-04 | 0.004 | 1.59 | -1.59   | OA-related |
| CSMD3    | 0.668 | 0.5237 | 6.2003 | 1.18E-04 | 0.004 | 1.59 | -0.5    | none       |
| ANKRD40  | 1.004 | 0.7633 | 6.2    | 1.18E-04 | 0.004 | 1.59 | -1.3782 | none       |
| TRIQQ    | 1.497 | 1.2202 | 6.198  | 1.18E-04 | 0.004 | 1.59 | -0.9765 | none       |
| ZNF844   | 0.761 | 0.6048 | 6.1965 | 1.18E-04 | 0.004 | 1.59 | -1.5328 | OA-related |
| CYP4F8   | 0.82  | 0.6336 | 6.196  | 1.19E-04 | 0.004 | 1.58 | -1.6056 | OA-related |
| OR5211   | 0.652 | 0.5013 | 6.194  | 1.19E-04 | 0.004 | 1.58 | -1.0983 | none       |
| CREB3L1  | 0.71  | 0.5474 | 6.1905 | 1.19E-04 | 0.004 | 1.58 | -0.8403 | none       |
| NPIPB15  | 1.494 | 1.2004 | 6.1888 | 1.20E-04 | 0.004 | 1.58 | -0.8776 | none       |
| CEP112   | 0.962 | 0.7478 | 6.1864 | 1.20E-04 | 0.004 | 1.57 | -1.2829 | none       |
| MYO15A   | 0.724 | 0.5329 | 6.183  | 1.20E-04 | 0.004 | 1.57 | -1.4536 | none       |
| C5AR2    | 0.749 | 0.5603 | 6.183  | 1.20E-04 | 0.004 | 1.57 | -1.6276 | OA-related |
| SCN3B    | 0.604 | 0.4334 | 6.1824 | 1.21E-04 | 0.004 | 1.57 | -1.2256 | none       |
| ZNF385C  | 1.029 | 0.7602 | 6.1818 | 1.21E-04 | 0.004 | 1.57 | -1.5452 | OA-related |
| HLA-DOA  | 0.9   | 0.6684 | 6.1813 | 1.21E-04 | 0.004 | 1.57 | -0.878  | none       |
| SCLY     | 0.771 | 0.6178 | 6.1797 | 1.21E-04 | 0.004 | 1.56 | -1.3263 | none       |
| PLEKHA5  | 0.961 | 0.7525 | 6.1765 | 1.21E-04 | 0.004 | 1.56 | -1.3439 | none       |
| GPALPP1  | 1.027 | 0.8557 | 6.1757 | 1.22E-04 | 0.004 | 1.56 | -1.5666 | OA-related |
| MOB1B    | 0.851 | 0.6805 | 6.1709 | 1.22E-04 | 0.004 | 1.55 | -1.3779 | none       |
| FUT8     | 1.075 | 0.926  | 6.1706 | 1.22E-04 | 0.004 | 1.55 | -1.5162 | none       |
| TSGA13   | 0.677 | 0.4967 | 6.1693 | 1.23E-04 | 0.004 | 1.55 | -1.4205 | none       |
| CSNK1D   | 1.013 | 0.8597 | 6.1688 | 1.23E-04 | 0.004 | 1.55 | -1.6311 | OA-related |
| POU2AF1  | 0.933 | 0.8316 | 6.1682 | 1.23E-04 | 0.004 | 1.55 | -1.3231 | none       |
| KLB      | 0.636 | 0.486  | 6.167  | 1.23E-04 | 0.004 | 1.55 | -1.5673 | OA-related |
| ZNF492   | 0.701 | 0.5353 | 6.1668 | 1.23E-04 | 0.004 | 1.55 | -1.4691 | none       |
| KLC3     | 0.993 | 0.8188 | 6.1557 | 1.25E-04 | 0.004 | 1.53 | -0.9953 | none       |
| TRAPPC2  | 0.704 | 0.5072 | 6.1552 | 1.25E-04 | 0.004 | 1.53 | -1.5022 | none       |
| ELAVL1   | 0.866 | 0.7087 | 6.1537 | 1.25E-04 | 0.004 | 1.53 | -1.6281 | OA-related |
| TINCR    | 1.13  | 0.8937 | 6.1534 | 1.25E-04 | 0.004 | 1.53 | -1.4333 | none       |
| C19ORF25 | 0.79  | 0.5734 | 6.1526 | 1.25E-04 | 0.004 | 1.53 | -1.4097 | none       |
| FCHO2    | 0.697 | 0.5464 | 6.1513 | 1.25E-04 | 0.004 | 1.53 | -1.3019 | none       |



|          |       |        |        |          |       |      |         |            |
|----------|-------|--------|--------|----------|-------|------|---------|------------|
| USHBP1   | 0.69  | 0.53   | 6.1487 | 1.26E-04 | 0.004 | 1.53 | -1.055  | none       |
| TFPI     | 0.778 | 0.5887 | 6.1426 | 1.27E-04 | 0.004 | 1.52 | -1.4371 | none       |
| COBLL1   | 0.794 | 0.6152 | 6.1381 | 1.28E-04 | 0.004 | 1.51 | -1.5457 | OA-related |
| HDAC6    | 1.158 | 1.0105 | 6.1381 | 1.28E-04 | 0.004 | 1.51 | -1.3555 | none       |
| FRRS1L   | 0.749 | 0.5726 | 6.1364 | 1.28E-04 | 0.004 | 1.51 | -1.5537 | OA-related |
| CCDC24   | 0.815 | 0.6251 | 6.1358 | 1.28E-04 | 0.004 | 1.51 | -1.5047 | none       |
| ZNF430   | 1.227 | 1.0889 | 6.1322 | 1.29E-04 | 0.004 | 1.5  | -1.4485 | none       |
| TMEM185  | 0.863 | 0.6392 | 6.1316 | 1.29E-04 | 0.004 | 1.5  | -1.3138 | none       |
| TERB1    | 1.557 | 1.254  | 6.1315 | 1.29E-04 | 0.004 | 1.5  | -0.8746 | none       |
| C12ORF50 | 0.75  | 0.5744 | 6.1294 | 1.29E-04 | 0.004 | 1.5  | -1.4048 | none       |
| CHRNB1   | 0.76  | 0.5441 | 6.1267 | 1.29E-04 | 0.004 | 1.5  | -1.2808 | none       |
| DYDC1    | 1.582 | 1.2867 | 6.1236 | 1.30E-04 | 0.004 | 1.49 | -1.2707 | none       |
| ETFDH    | 0.617 | 0.4912 | 6.123  | 1.30E-04 | 0.004 | 1.49 | -1.4488 | none       |
| PGS1     | 0.745 | 0.5899 | 6.1191 | 1.31E-04 | 0.004 | 1.49 | -1.4837 | none       |
| CYP1A2   | 0.772 | 0.6126 | 6.1162 | 1.31E-04 | 0.004 | 1.48 | -1.6119 | OA-related |
| SPACA9   | 0.682 | 0.4884 | 6.1151 | 1.31E-04 | 0.004 | 1.48 | -1.2342 | none       |
| SLC52A1  | 0.846 | 0.6352 | 6.1146 | 1.31E-04 | 0.004 | 1.48 | -1.473  | none       |
| C9ORF85  | 0.829 | 0.6256 | 6.1141 | 1.32E-04 | 0.004 | 1.48 | -1.5001 | none       |
| ZIM3     | 0.66  | 0.4896 | 6.1134 | 1.32E-04 | 0.004 | 1.48 | -1.5733 | OA-related |
| NRROS    | 0.658 | 0.5723 | 6.1129 | 1.32E-04 | 0.004 | 1.48 | -0.8137 | none       |
| MPRIP    | 1.233 | 1.0951 | 6.1114 | 1.32E-04 | 0.004 | 1.48 | -1.3025 | none       |
| GAL3ST1  | 0.738 | 0.564  | 6.1098 | 1.32E-04 | 0.004 | 1.48 | -1.2527 | none       |
| CCDC36   | 0.819 | 0.6643 | 6.109  | 1.32E-04 | 0.004 | 1.48 | -0.955  | none       |
| ARID1B   | 1.58  | 1.4346 | 6.1045 | 1.33E-04 | 0.004 | 1.47 | -0.9199 | none       |
| UEVLD    | 0.773 | 0.5471 | 6.1022 | 1.34E-04 | 0.004 | 1.47 | -1.3998 | none       |
| TAS2R4   | 0.63  | 0.5173 | 6.101  | 1.34E-04 | 0.004 | 1.47 | -1.4989 | none       |
| CEACAM1  | 1.142 | 0.957  | 6.1005 | 1.34E-04 | 0.004 | 1.46 | -0.8188 | none       |
| SFMBT1   | 0.983 | 0.7956 | 6.0944 | 1.35E-04 | 0.004 | 1.46 | -1.2259 | none       |
| BBIP1    | 0.703 | 0.4292 | 6.0943 | 1.35E-04 | 0.004 | 1.46 | -0.2578 | none       |
| LAMC2    | 0.635 | 0.4772 | 6.094  | 1.35E-04 | 0.004 | 1.46 | -1.2085 | none       |
| RASEF    | 0.673 | 0.5398 | 6.0933 | 1.35E-04 | 0.004 | 1.46 | -1.5487 | OA-related |
| CNKSR3   | 0.621 | 0.4518 | 6.0923 | 1.35E-04 | 0.004 | 1.45 | -1.4711 | none       |
| ZNF846   | 1.058 | 0.8883 | 6.0915 | 1.35E-04 | 0.004 | 1.45 | -0.7219 | none       |
| CDH18    | 0.943 | 0.7456 | 6.0913 | 1.35E-04 | 0.004 | 1.45 | -1.1485 | none       |
| SLC50A1  | 0.697 | 0.4742 | 6.0864 | 1.36E-04 | 0.004 | 1.45 | -1.3709 | none       |
| CLEC3A   | 0.874 | 0.6665 | 6.0861 | 1.36E-04 | 0.004 | 1.45 | -1.4558 | none       |
| ADAMTS4  | 0.721 | 0.5815 | 6.0854 | 1.37E-04 | 0.004 | 1.45 | -1.3359 | none       |
| NXN      | 0.786 | 0.5919 | 6.0832 | 1.37E-04 | 0.004 | 1.44 | -0.8436 | none       |
| COG1     | 1.028 | 0.8868 | 6.0826 | 1.37E-04 | 0.004 | 1.44 | -1.2424 | none       |
| EFCAB2   | 0.973 | 0.7132 | 6.0823 | 1.37E-04 | 0.004 | 1.44 | -1.4014 | none       |

|          |       |        |        |          |       |      |         |            |
|----------|-------|--------|--------|----------|-------|------|---------|------------|
| MARK3    | 1.22  | 1.0489 | 6.0804 | 1.37E-04 | 0.004 | 1.44 | -1.528  | none       |
| COL8A1   | 0.766 | 0.6083 | 6.0781 | 1.38E-04 | 0.004 | 1.44 | -0.7549 | none       |
| GSDMB    | 0.765 | 0.5914 | 6.077  | 1.38E-04 | 0.004 | 1.43 | -1.2225 | none       |
| EFCAB11  | 1.171 | 0.8735 | 6.074  | 1.39E-04 | 0.004 | 1.43 | -1.1881 | none       |
| MEFV     | 0.784 | 0.5631 | 6.0633 | 1.40E-04 | 0.004 | 1.42 | -1.4252 | none       |
| ZNF586   | 0.78  | 0.5908 | 6.0604 | 1.41E-04 | 0.004 | 1.41 | -1.3969 | none       |
| GAB1     | 1.03  | 0.8156 | 6.0544 | 1.42E-04 | 0.004 | 1.41 | -1.5167 | none       |
| IFT122   | 1.128 | 0.9399 | 6.0485 | 1.43E-04 | 0.004 | 1.4  | -1.416  | none       |
| OR7A17   | 0.768 | 0.5701 | 6.0484 | 1.43E-04 | 0.004 | 1.4  | -1.521  | none       |
| ZNF114   | 0.745 | 0.5448 | 6.048  | 1.43E-04 | 0.004 | 1.4  | -1.4348 | none       |
| S1PR3    | 0.635 | 0.4607 | 6.0472 | 1.43E-04 | 0.004 | 1.4  | -1.5542 | OA-related |
| ABCG8    | 0.707 | 0.5627 | 6.0428 | 1.44E-04 | 0.004 | 1.39 | -1.5053 | none       |
| KCNC1    | 1.164 | 0.9981 | 6.0383 | 1.45E-04 | 0.004 | 1.39 | -1.1027 | none       |
| STAP2    | 0.897 | 0.704  | 6.0376 | 1.45E-04 | 0.004 | 1.38 | -1.3874 | none       |
| FGFR1    | 0.798 | 0.6107 | 6.0367 | 1.45E-04 | 0.004 | 1.38 | -1.3878 | none       |
| LGMN     | 0.88  | 0.7044 | 6.0359 | 1.46E-04 | 0.004 | 1.38 | -1.4653 | none       |
| KIAA1191 | 0.797 | 0.603  | 6.0344 | 1.46E-04 | 0.004 | 1.38 | -0.9041 | none       |
| RPRD1A   | 0.765 | 0.5444 | 6.0292 | 1.47E-04 | 0.004 | 1.37 | -0.4985 | none       |
| SLC24A4  | 0.639 | 0.4818 | 6.0272 | 1.47E-04 | 0.004 | 1.37 | -1.621  | OA-related |
| RASGRP3  | 1.008 | 0.8334 | 6.0271 | 1.47E-04 | 0.004 | 1.37 | -1.4525 | none       |
| C6ORF141 | 1.213 | 1.0085 | 6.0233 | 1.48E-04 | 0.004 | 1.37 | -1.0781 | none       |
| UTP14C   | 0.77  | 0.5131 | 6.0223 | 1.48E-04 | 0.004 | 1.37 | 0.0645  | none       |
| SGCE     | 0.85  | 0.6604 | 6.0207 | 1.48E-04 | 0.004 | 1.36 | -1.567  | OA-related |
| ASB9     | 0.981 | 0.7875 | 6.0171 | 1.49E-04 | 0.004 | 1.36 | 0.22548 | none       |
| TADA2A   | 1.267 | 1.0475 | 6.0169 | 1.49E-04 | 0.004 | 1.36 | -1.3285 | none       |
| GP2      | 0.63  | 0.491  | 6.0141 | 1.50E-04 | 0.004 | 1.35 | -0.1776 | none       |
| ZNF3     | 1.067 | 0.8993 | 6.0136 | 1.50E-04 | 0.004 | 1.35 | -1.5245 | none       |
| FBXO43   | 0.774 | 0.5837 | 6.0132 | 1.50E-04 | 0.004 | 1.35 | -1.422  | none       |
| HVCN1    | 0.79  | 0.552  | 6.0129 | 1.50E-04 | 0.004 | 1.35 | -1.0141 | none       |
| METTL2B  | 0.831 | 0.6624 | 6.011  | 1.50E-04 | 0.004 | 1.35 | -1.3083 | none       |
| RUVBL1   | 0.802 | 0.6446 | 6.0093 | 1.51E-04 | 0.004 | 1.35 | -1.4965 | none       |
| KCTD21   | 1.047 | 0.814  | 6.0035 | 1.52E-04 | 0.004 | 1.34 | -1.3817 | none       |
| STK38L   | 0.752 | 0.5691 | 6.0031 | 1.52E-04 | 0.004 | 1.34 | -1.2979 | none       |
| ZNF713   | 0.849 | 0.705  | 5.9999 | 1.52E-04 | 0.004 | 1.34 | -1.5386 | OA-related |
| SUOX     | 0.727 | 0.5603 | 5.9994 | 1.53E-04 | 0.004 | 1.34 | -1.5022 | none       |
| PTPN2    | 0.728 | 0.5507 | 5.9973 | 1.53E-04 | 0.004 | 1.33 | -1.2591 | none       |
| PTGR2    | 0.706 | 0.5868 | 5.996  | 1.53E-04 | 0.004 | 1.33 | -1.3507 | none       |
| LAMB4    | 0.828 | 0.6101 | 5.9912 | 1.54E-04 | 0.004 | 1.33 | -1.2028 | none       |
| GHR      | 0.95  | 0.7458 | 5.9907 | 1.54E-04 | 0.004 | 1.32 | -1.4194 | none       |
| COG4     | 0.737 | 0.582  | 5.9901 | 1.54E-04 | 0.004 | 1.32 | -1.3415 | none       |

|          |       |        |        |          |       |      |         |            |
|----------|-------|--------|--------|----------|-------|------|---------|------------|
| TTLL9    | 0.579 | 0.4421 | 5.9899 | 1.54E-04 | 0.004 | 1.32 | -1.4198 | none       |
| C8ORF44  | 0.982 | 0.6776 | 5.9897 | 1.54E-04 | 0.004 | 1.32 | -1.4439 | none       |
| NFS1     | 0.799 | 0.6485 | 5.9879 | 1.55E-04 | 0.004 | 1.32 | -1.461  | none       |
| MOGAT3   | 0.707 | 0.5305 | 5.9835 | 1.56E-04 | 0.004 | 1.32 | -1.5928 | OA-related |
| SLC11A2  | 0.648 | 0.4509 | 5.9817 | 1.56E-04 | 0.004 | 1.31 | -1.5199 | none       |
| GNPTG    | 0.814 | 0.7143 | 5.9808 | 1.56E-04 | 0.004 | 1.31 | -1.0513 | none       |
| CLEC4M   | 0.847 | 0.6681 | 5.9793 | 1.57E-04 | 0.004 | 1.31 | -1.1588 | none       |
| FBXL20   | 0.617 | 0.4432 | 5.9789 | 1.57E-04 | 0.004 | 1.31 | -1.3216 | none       |
| TANGO6   | 1.018 | 0.8406 | 5.9787 | 1.57E-04 | 0.004 | 1.31 | -1.0497 | none       |
| SIRT2    | 0.798 | 0.6022 | 5.9743 | 1.58E-04 | 0.004 | 1.3  | -1.2058 | none       |
| KDM1B    | 0.977 | 0.8271 | 5.9723 | 1.58E-04 | 0.004 | 1.3  | -1.0823 | none       |
| TRIM65   | 0.978 | 0.8144 | 5.9722 | 1.58E-04 | 0.004 | 1.3  | -1.2938 | none       |
| NUPL2    | 0.771 | 0.561  | 5.9684 | 1.59E-04 | 0.004 | 1.3  | -1.3478 | none       |
| PDZD2    | 0.849 | 0.6667 | 5.9682 | 1.59E-04 | 0.004 | 1.3  | -0.6122 | none       |
| GJC1     | 0.744 | 0.5283 | 5.9675 | 1.59E-04 | 0.004 | 1.29 | -1.5043 | none       |
| MSS51    | 0.769 | 0.5913 | 5.9673 | 1.59E-04 | 0.004 | 1.29 | -1.5043 | none       |
| TRPM4    | 0.706 | 0.5441 | 5.9672 | 1.59E-04 | 0.004 | 1.29 | -1.4277 | none       |
| MUTYH    | 0.894 | 0.7157 | 5.9654 | 1.59E-04 | 0.004 | 1.29 | -1.5911 | OA-related |
| MME      | 0.789 | 0.5918 | 5.9635 | 1.60E-04 | 0.004 | 1.29 | -1.3289 | none       |
| PAWR     | 0.824 | 0.707  | 5.9622 | 1.60E-04 | 0.004 | 1.29 | -1.2639 | none       |
| BOLL     | 0.612 | 0.4556 | 5.9619 | 1.60E-04 | 0.004 | 1.29 | -1.0938 | none       |
| AAMDC    | 0.925 | 0.6401 | 5.9619 | 1.60E-04 | 0.004 | 1.29 | -1.2324 | none       |
| SULT2A1  | 0.777 | 0.5759 | 5.9618 | 1.60E-04 | 0.004 | 1.29 | -1.5421 | OA-related |
| SF3B3    | 0.614 | 0.5066 | 5.9602 | 1.61E-04 | 0.004 | 1.29 | -1.0856 | none       |
| ATF7IP2  | 0.601 | 0.4378 | 5.9593 | 1.61E-04 | 0.004 | 1.28 | -0.8742 | none       |
| C15ORF41 | 0.8   | 0.5663 | 5.956  | 1.61E-04 | 0.004 | 1.28 | -0.9202 | none       |
| IRGQ     | 0.889 | 0.7295 | 5.9551 | 1.62E-04 | 0.004 | 1.28 | -1.5003 | none       |
| PPIL6    | 0.858 | 0.6919 | 5.9542 | 1.62E-04 | 0.004 | 1.28 | -1.1666 | none       |
| CHRNA6   | 1.536 | 1.1863 | 5.952  | 1.62E-04 | 0.004 | 1.27 | -1.3544 | none       |
| OSTM1    | 0.766 | 0.5505 | 5.9507 | 1.63E-04 | 0.004 | 1.27 | -0.8885 | none       |
| ARHGDIG  | 1.2   | 0.9882 | 5.9501 | 1.63E-04 | 0.004 | 1.27 | -1.1903 | none       |
| FCN1     | 0.567 | 0.4488 | 5.9473 | 1.63E-04 | 0.004 | 1.27 | -1.4598 | none       |
| ZNF564   | 0.861 | 0.621  | 5.9428 | 1.64E-04 | 0.004 | 1.26 | -1.03   | none       |
| NAP1L6   | 0.858 | 0.6793 | 5.9402 | 1.65E-04 | 0.004 | 1.26 | -0.9036 | none       |
| TM7SF3   | 0.914 | 0.6384 | 5.9382 | 1.65E-04 | 0.004 | 1.26 | -1.1723 | none       |
| LYPD5    | 0.744 | 0.547  | 5.9371 | 1.65E-04 | 0.004 | 1.26 | -1.5748 | OA-related |
| OR2L2    | 0.646 | 0.4945 | 5.9358 | 1.66E-04 | 0.004 | 1.25 | -1.5336 | OA-related |
| SLC35E3  | 0.884 | 0.6945 | 5.9354 | 1.66E-04 | 0.004 | 1.25 | -0.6225 | none       |
| CNTN1    | 0.846 | 0.6517 | 5.9334 | 1.66E-04 | 0.004 | 1.25 | -1.0128 | none       |
| ZNF397   | 0.836 | 0.6419 | 5.9333 | 1.66E-04 | 0.004 | 1.25 | -1.39   | none       |

|           |       |        |        |          |       |      |         |            |
|-----------|-------|--------|--------|----------|-------|------|---------|------------|
| FAM228B   | 0.942 | 0.8086 | 5.9331 | 1.66E-04 | 0.004 | 1.25 | -1.3903 | none       |
| NOVA2     | 0.991 | 0.7445 | 5.9322 | 1.66E-04 | 0.004 | 1.25 | -1.2108 | none       |
| MYH11     | 0.803 | 0.6364 | 5.932  | 1.67E-04 | 0.004 | 1.25 | -1.3422 | none       |
| AC007325  | 0.61  | 0.4481 | 5.9319 | 1.67E-04 | 0.004 | 1.25 | -1.1803 | none       |
| CYP3A5    | 0.691 | 0.5656 | 5.9313 | 1.67E-04 | 0.004 | 1.25 | -1.5291 | none       |
| SPATA21   | 0.651 | 0.4985 | 5.9304 | 1.67E-04 | 0.004 | 1.25 | -1.3576 | none       |
| GSG1      | 0.706 | 0.5655 | 5.9288 | 1.67E-04 | 0.004 | 1.25 | -1.5378 | OA-related |
| ZNF839    | 0.747 | 0.5989 | 5.9266 | 1.68E-04 | 0.004 | 1.24 | -0.9592 | none       |
| ZNF805    | 0.685 | 0.4752 | 5.9189 | 1.69E-04 | 0.004 | 1.23 | -1.3362 | none       |
| CNPY4     | 0.921 | 0.7424 | 5.9184 | 1.70E-04 | 0.004 | 1.23 | -1.5359 | OA-related |
| ELF5      | 0.817 | 0.6504 | 5.9172 | 1.70E-04 | 0.004 | 1.23 | -1.5509 | OA-related |
| DEPDC5    | 0.934 | 0.7688 | 5.9168 | 1.70E-04 | 0.004 | 1.23 | -1.2565 | none       |
| TLR3      | 0.532 | 0.3794 | 5.9142 | 1.70E-04 | 0.004 | 1.23 | -1.2206 | none       |
| FRK       | 0.658 | 0.5039 | 5.9134 | 1.71E-04 | 0.004 | 1.23 | -1.4513 | none       |
| SMURF2    | 0.9   | 0.7818 | 5.9129 | 1.71E-04 | 0.004 | 1.22 | -1.5338 | OA-related |
| CASK      | 0.971 | 0.8018 | 5.9127 | 1.71E-04 | 0.004 | 1.22 | -1.0156 | none       |
| TRPM8     | 0.677 | 0.4699 | 5.9122 | 1.71E-04 | 0.004 | 1.22 | -1.3541 | none       |
| PDE12     | 0.568 | 0.4426 | 5.91   | 1.71E-04 | 0.004 | 1.22 | -1.0111 | none       |
| ZNF396    | 0.81  | 0.5726 | 5.9088 | 1.72E-04 | 0.004 | 1.22 | -0.9842 | none       |
| BACE1     | 1.037 | 0.937  | 5.9076 | 1.72E-04 | 0.004 | 1.22 | -1.4648 | none       |
| SEC14L6   | 0.757 | 0.5708 | 5.9074 | 1.72E-04 | 0.004 | 1.22 | -1.6092 | OA-related |
| SLC23A1   | 1.013 | 0.8972 | 5.9049 | 1.73E-04 | 0.004 | 1.21 | -0.4876 | none       |
| ZNF12     | 1.036 | 0.8459 | 5.9041 | 1.73E-04 | 0.004 | 1.21 | -1.5375 | OA-related |
| RILPL1    | 0.801 | 0.6704 | 5.9036 | 1.73E-04 | 0.004 | 1.21 | -1.6272 | OA-related |
| NSRP1     | 1.289 | 1.1558 | 5.9027 | 1.73E-04 | 0.004 | 1.21 | -1.4265 | none       |
| TNFAIP8L3 | 0.703 | 0.5228 | 5.9025 | 1.73E-04 | 0.004 | 1.21 | -1.3811 | none       |
| SYT12     | 0.555 | 0.4295 | 5.901  | 1.73E-04 | 0.004 | 1.21 | -1.4201 | none       |
| DNAH3     | 0.843 | 0.6764 | 5.9007 | 1.73E-04 | 0.004 | 1.21 | -1.3489 | none       |
| ANKRD16   | 0.593 | 0.436  | 5.9004 | 1.74E-04 | 0.004 | 1.21 | -1.4894 | none       |
| SFXN5     | 0.858 | 0.5843 | 5.8998 | 1.74E-04 | 0.004 | 1.21 | -1.1413 | none       |
| CPM       | 0.891 | 0.7217 | 5.897  | 1.74E-04 | 0.004 | 1.2  | -1.0769 | none       |
| ABCA6     | 0.729 | 0.5621 | 5.8952 | 1.75E-04 | 0.004 | 1.2  | -1.221  | none       |
| ACOT11    | 0.748 | 0.6034 | 5.895  | 1.75E-04 | 0.004 | 1.2  | -1.5563 | OA-related |
| ZNF283    | 0.966 | 0.75   | 5.8906 | 1.76E-04 | 0.004 | 1.2  | -1.4471 | none       |
| ATP6V0A1  | 0.665 | 0.4877 | 5.8875 | 1.77E-04 | 0.004 | 1.19 | -1.4741 | none       |
| CSNK2A1   | 0.576 | 0.4351 | 5.8818 | 1.78E-04 | 0.004 | 1.18 | -1.0028 | none       |
| STK25     | 0.802 | 0.659  | 5.8799 | 1.78E-04 | 0.004 | 1.18 | -1.2932 | none       |
| GALNT9    | 0.708 | 0.572  | 5.8759 | 1.79E-04 | 0.004 | 1.18 | -0.8726 | none       |
| SCPEP1    | 0.643 | 0.4309 | 5.8742 | 1.80E-04 | 0.004 | 1.17 | -1.3134 | none       |
| ANKLE2    | 1.049 | 0.9472 | 5.8718 | 1.80E-04 | 0.004 | 1.17 | -1.4423 | none       |

|          |       |        |        |          |       |      |         |            |
|----------|-------|--------|--------|----------|-------|------|---------|------------|
| SPINK1   | 1.037 | 0.7518 | 5.8683 | 1.81E-04 | 0.005 | 1.17 | -1.3864 | none       |
| KIF6     | 0.895 | 0.7225 | 5.8656 | 1.82E-04 | 0.005 | 1.16 | -1.4666 | none       |
| CHN2     | 1.629 | 1.3654 | 5.8637 | 1.82E-04 | 0.005 | 1.16 | -1.1337 | none       |
| BRAF     | 0.74  | 0.5959 | 5.8625 | 1.82E-04 | 0.005 | 1.16 | -1.5515 | OA-related |
| SNTG1    | 0.913 | 0.7402 | 5.8597 | 1.83E-04 | 0.005 | 1.16 | -1.2972 | none       |
| NPC1     | 0.577 | 0.4767 | 5.8586 | 1.83E-04 | 0.005 | 1.15 | -1.3919 | none       |
| ARHGAP2  | 0.848 | 0.6619 | 5.8582 | 1.83E-04 | 0.005 | 1.15 | -0.7805 | none       |
| C9ORF66  | 0.713 | 0.5531 | 5.8544 | 1.84E-04 | 0.005 | 1.15 | -1.4295 | none       |
| NEK10    | 0.778 | 0.6125 | 5.8542 | 1.84E-04 | 0.005 | 1.15 | -1.3314 | none       |
| FRMPD3   | 0.719 | 0.5454 | 5.8521 | 1.85E-04 | 0.005 | 1.15 | -1.4397 | none       |
| HSD17B13 | 0.73  | 0.5704 | 5.8438 | 1.87E-04 | 0.005 | 1.13 | -1.5002 | none       |
| PCDHB1   | 0.691 | 0.5147 | 5.843  | 1.87E-04 | 0.005 | 1.13 | -1.5646 | OA-related |
| PLBD1    | 0.871 | 0.6886 | 5.8416 | 1.88E-04 | 0.005 | 1.13 | -1.1155 | none       |
| GALK2    | 0.726 | 0.5012 | 5.8406 | 1.88E-04 | 0.005 | 1.13 | -1.4737 | none       |
| STX8     | 0.881 | 0.6618 | 5.8404 | 1.88E-04 | 0.005 | 1.13 | -1.0563 | none       |
| GFI1B    | 0.662 | 0.5074 | 5.8387 | 1.88E-04 | 0.005 | 1.13 | -1.2996 | none       |
| L3MBTL1  | 0.776 | 0.5703 | 5.8383 | 0.00019  | 0.005 | 1.13 | -1.5154 | none       |
| PRKG1    | 0.893 | 0.6717 | 5.8376 | 1.88E-04 | 0.005 | 1.13 | -1.0669 | none       |
| DAPK2    | 0.782 | 0.6174 | 5.8376 | 1.88E-04 | 0.005 | 1.13 | -1.3803 | none       |
| GPR82    | 0.985 | 0.7497 | 5.8343 | 1.89E-04 | 0.005 | 1.12 | -0.9649 | none       |
| ZNF487   | 0.845 | 0.6308 | 5.83   | 1.90E-04 | 0.005 | 1.12 | -0.7032 | none       |
| GTF2IRD2 | 0.927 | 0.7365 | 5.8283 | 1.91E-04 | 0.005 | 1.11 | -1.3855 | none       |
| INHBE    | 0.535 | 0.3938 | 5.8225 | 1.92E-04 | 0.005 | 1.11 | -1.5082 | none       |
| FUT2     | 0.702 | 0.5512 | 5.8209 | 1.93E-04 | 0.005 | 1.1  | -1.5575 | OA-related |
| OR56A4   | 0.729 | 0.5372 | 5.8192 | 1.93E-04 | 0.005 | 1.1  | -1.1095 | none       |
| CERS5    | 0.849 | 0.6106 | 5.816  | 1.94E-04 | 0.005 | 1.1  | -1.1234 | none       |
| GATAD1   | 0.81  | 0.703  | 5.8156 | 1.94E-04 | 0.005 | 1.1  | -1.5065 | none       |
| KANSL3   | 1.075 | 0.8973 | 5.815  | 1.94E-04 | 0.005 | 1.1  | -1.5278 | none       |
| TPM1     | 0.788 | 0.6075 | 5.813  | 1.95E-04 | 0.005 | 1.09 | -1.5828 | OA-related |
| PUS10    | 0.911 | 0.725  | 5.8127 | 1.95E-04 | 0.005 | 1.09 | -1.3377 | none       |
| PFKM     | 0.968 | 0.8037 | 5.8081 | 1.96E-04 | 0.005 | 1.09 | -1.4857 | none       |
| SPP2     | 0.861 | 0.6577 | 5.807  | 1.96E-04 | 0.005 | 1.09 | -0.8926 | none       |
| PPIAL4G  | 0.594 | 0.4624 | 5.8067 | 1.96E-04 | 0.005 | 1.09 | -1.4716 | none       |
| P3H4     | 0.814 | 0.6203 | 5.8061 | 1.97E-04 | 0.005 | 1.09 | -1.3322 | none       |
| FCER1G   | 0.861 | 0.6181 | 5.8058 | 1.97E-04 | 0.005 | 1.08 | -0.9957 | none       |
| TMEM67   | 1.016 | 0.7554 | 5.8031 | 1.97E-04 | 0.005 | 1.08 | -1.1904 | none       |
| GFM1     | 0.832 | 0.6698 | 5.8025 | 1.97E-04 | 0.005 | 1.08 | -0.955  | none       |
| PCDHGA6  | 0.586 | 0.4254 | 5.8023 | 1.97E-04 | 0.005 | 1.08 | -1.5227 | none       |
| DCN      | 1.023 | 0.8452 | 5.8017 | 1.98E-04 | 0.005 | 1.08 | -1.1938 | none       |
| SOX6     | 0.939 | 0.7977 | 5.8016 | 1.98E-04 | 0.005 | 1.08 | -0.5472 | none       |

|          |       |        |        |          |       |      |         |            |
|----------|-------|--------|--------|----------|-------|------|---------|------------|
| ZSWIM1   | 0.844 | 0.7458 | 5.8011 | 1.98E-04 | 0.005 | 1.08 | -1.5657 | OA-related |
| C20ORF14 | 0.798 | 0.5979 | 5.7993 | 1.98E-04 | 0.005 | 1.08 | -1.5683 | OA-related |
| SNIP1    | 0.651 | 0.5232 | 5.7984 | 1.99E-04 | 0.005 | 1.08 | -1.5273 | none       |
| S100PBP  | 0.742 | 0.4983 | 5.797  | 1.99E-04 | 0.005 | 1.07 | -1.3943 | none       |
| ABCG1    | 1.159 | 0.8757 | 5.7966 | 1.99E-04 | 0.005 | 1.07 | -1.0044 | none       |
| CELF5    | 0.75  | 0.5854 | 5.7965 | 1.99E-04 | 0.005 | 1.07 | -1.2937 | none       |
| SOX13    | 0.598 | 0.4263 | 5.7958 | 1.99E-04 | 0.005 | 1.07 | -1.4881 | none       |
| NRG4     | 1.408 | 1.2299 | 5.7951 | 1.99E-04 | 0.005 | 1.07 | -1.089  | none       |
| RNF220   | 0.836 | 0.6996 | 5.7944 | 2.00E-04 | 0.005 | 1.07 | -1.2126 | none       |
| CSMD1    | 0.894 | 0.8411 | 5.7923 | 2.00E-04 | 0.005 | 1.07 | -0.4422 | none       |
| DAAM2    | 0.824 | 0.6049 | 5.7908 | 2.01E-04 | 0.005 | 1.07 | -1.1831 | none       |
| ZNF665   | 1.023 | 0.7701 | 5.7907 | 2.01E-04 | 0.005 | 1.07 | -1.2771 | none       |
| ELN      | 1.094 | 0.8225 | 5.7886 | 2.01E-04 | 0.005 | 1.06 | -0.5786 | none       |
| TMEM212  | 0.703 | 0.5375 | 5.7879 | 2.01E-04 | 0.005 | 1.06 | -1.34   | none       |
| DNAJC5G  | 0.778 | 0.6017 | 5.7843 | 2.02E-04 | 0.005 | 1.06 | -0.3891 | none       |
| OR1A1    | 0.632 | 0.4984 | 5.784  | 2.02E-04 | 0.005 | 1.06 | -1.6414 | OA-related |
| CEBPZOS  | 0.694 | 0.5141 | 5.7823 | 2.03E-04 | 0.005 | 1.05 | -1.3594 | none       |
| PNPO     | 0.552 | 0.3929 | 5.7788 | 2.04E-04 | 0.005 | 1.05 | -1.1689 | none       |
| ERO1A    | 0.774 | 0.5286 | 5.7776 | 2.04E-04 | 0.005 | 1.05 | -1.5479 | OA-related |
| BLOC1S6  | 0.595 | 0.4454 | 5.7772 | 2.04E-04 | 0.005 | 1.05 | -1.2355 | none       |
| CBFA2T2  | 0.892 | 0.7361 | 5.777  | 2.04E-04 | 0.005 | 1.05 | -1.5974 | OA-related |
| FITM2    | 0.662 | 0.5231 | 5.7751 | 2.05E-04 | 0.005 | 1.04 | -1.5401 | OA-related |
| UQCRHL   | 0.62  | 0.4484 | 5.775  | 2.05E-04 | 0.005 | 1.04 | -1.2546 | none       |
| PPP2R2D  | 0.705 | 0.5621 | 5.7749 | 2.05E-04 | 0.005 | 1.04 | -0.8953 | none       |
| PIGN     | 0.577 | 0.3477 | 5.7745 | 2.05E-04 | 0.005 | 1.04 | -1.1367 | none       |
| PROCR    | 1.015 | 0.7693 | 5.7739 | 2.05E-04 | 0.005 | 1.04 | -1.2134 | none       |
| TIAM2    | 1.428 | 1.1828 | 5.7711 | 2.06E-04 | 0.005 | 1.04 | -1.3935 | none       |
| OR51B5   | 0.639 | 0.4522 | 5.7699 | 2.06E-04 | 0.005 | 1.04 | -0.9761 | none       |
| FAM71F2  | 0.954 | 0.632  | 5.7696 | 2.06E-04 | 0.005 | 1.04 | -1.2023 | none       |
| ZNF544   | 0.855 | 0.6638 | 5.769  | 2.06E-04 | 0.005 | 1.04 | -1.4164 | none       |
| A2ML1    | 0.652 | 0.5428 | 5.7658 | 2.07E-04 | 0.005 | 1.03 | -1.2933 | none       |
| CLCN6    | 0.826 | 0.6976 | 5.7636 | 2.08E-04 | 0.005 | 1.03 | -1.2529 | none       |
| OPRM1    | 0.576 | 0.4445 | 5.7604 | 2.09E-04 | 0.005 | 1.03 | -1.6403 | OA-related |
| CDC20B   | 0.677 | 0.5057 | 5.7586 | 2.09E-04 | 0.005 | 1.02 | -1.3443 | none       |
| FAM189B  | 0.612 | 0.4618 | 5.7582 | 2.09E-04 | 0.005 | 1.02 | -1.5899 | OA-related |
| TMEM40   | 0.793 | 0.5974 | 5.7563 | 2.10E-04 | 0.005 | 1.02 | -1.2453 | none       |
| SRSF12   | 0.933 | 0.6406 | 5.7559 | 2.10E-04 | 0.005 | 1.02 | -1.4303 | none       |
| GTF2I    | 1.002 | 0.8758 | 5.7545 | 2.10E-04 | 0.005 | 1.02 | -1.5524 | OA-related |
| TNFRSF1A | 0.625 | 0.4765 | 5.7534 | 2.11E-04 | 0.005 | 1.02 | -1.1816 | none       |
| C5       | 1.046 | 0.8396 | 5.7519 | 2.11E-04 | 0.005 | 1.01 | -1.3821 | none       |

|          |       |        |        |          |       |      |         |            |
|----------|-------|--------|--------|----------|-------|------|---------|------------|
| OR2B11   | 0.521 | 0.3902 | 5.7477 | 2.12E-04 | 0.005 | 1.01 | -1.6537 | OA-related |
| ZFP42    | 0.652 | 0.4917 | 5.7477 | 2.12E-04 | 0.005 | 1.01 | -1.555  | OA-related |
| TRAF6    | 0.837 | 0.6396 | 5.7468 | 2.13E-04 | 0.005 | 1.01 | -0.8714 | none       |
| KCNN1    | 0.745 | 0.5601 | 5.7462 | 2.13E-04 | 0.005 | 1.01 | -1.4383 | none       |
| CA5A     | 0.768 | 0.5646 | 5.7449 | 2.13E-04 | 0.005 | 1    | -1.5911 | OA-related |
| ABCC2    | 0.891 | 0.6845 | 5.7445 | 2.13E-04 | 0.005 | 1    | -0.8125 | none       |
| BHMT     | 0.836 | 0.7136 | 5.7434 | 2.14E-04 | 0.005 | 1    | -0.6839 | none       |
| USP54    | 1.184 | 1.0341 | 5.7415 | 2.14E-04 | 0.005 | 1    | -1.2409 | none       |
| IL10     | 0.966 | 0.8171 | 5.7367 | 2.15E-04 | 0.005 | 0.99 | -1.0211 | none       |
| PQLC1    | 0.879 | 0.6702 | 5.7353 | 2.16E-04 | 0.005 | 0.99 | -1.071  | none       |
| RBM23    | 0.713 | 0.5621 | 5.7349 | 2.16E-04 | 0.005 | 0.99 | -1.1371 | none       |
| GIGYF2   | 1.15  | 0.9682 | 5.7331 | 2.17E-04 | 0.005 | 0.99 | -1.2678 | none       |
| SHC1     | 0.719 | 0.5986 | 5.7326 | 2.17E-04 | 0.005 | 0.99 | -1.2061 | none       |
| ZMAT3    | 0.597 | 0.4122 | 5.7315 | 2.17E-04 | 0.005 | 0.99 | -1.3396 | none       |
| MAP3K10  | 0.925 | 0.794  | 5.7314 | 2.17E-04 | 0.005 | 0.99 | -1.4845 | none       |
| SPATA31A | 0.951 | 0.8268 | 5.7304 | 2.17E-04 | 0.005 | 0.99 | -1.4923 | none       |
| CAPN10   | 0.567 | 0.4907 | 5.7273 | 2.18E-04 | 0.005 | 0.98 | -0.7109 | none       |
| HSD11B1L | 1.297 | 0.9646 | 5.7243 | 2.19E-04 | 0.005 | 0.98 | -1.1802 | none       |
| HMGCS1   | 0.621 | 0.4819 | 5.7236 | 2.19E-04 | 0.005 | 0.98 | -0.9093 | none       |
| ZNF785   | 0.789 | 0.6092 | 5.7218 | 2.20E-04 | 0.005 | 0.97 | -1.2867 | none       |
| NUP133   | 0.604 | 0.4789 | 5.7212 | 2.20E-04 | 0.005 | 0.97 | -1.0085 | none       |
| MTFMT    | 0.562 | 0.3793 | 5.7207 | 2.20E-04 | 0.005 | 0.97 | -1.2717 | none       |
| RDH16    | 0.534 | 0.387  | 5.72   | 2.20E-04 | 0.005 | 0.97 | -1.6027 | OA-related |
| AKAP9    | 1.016 | 0.8647 | 5.7188 | 2.21E-04 | 0.005 | 0.97 | -1.5057 | none       |
| OXR1     | 1.061 | 0.9066 | 5.7176 | 2.21E-04 | 0.005 | 0.97 | -0.8545 | none       |
| ST5      | 1.364 | 1.1947 | 5.7162 | 2.21E-04 | 0.005 | 0.97 | -1.2426 | none       |
| SERPINF1 | 0.744 | 0.6448 | 5.7155 | 2.22E-04 | 0.005 | 0.97 | -1.1708 | none       |
| LRRTM4   | 0.944 | 0.7951 | 5.7154 | 2.22E-04 | 0.005 | 0.97 | -1.0879 | none       |
| HOGA1    | 0.753 | 0.5709 | 5.7133 | 2.22E-04 | 0.005 | 0.96 | -1.0532 | none       |
| ANKRD62  | 0.494 | 0.3589 | 5.7129 | 2.22E-04 | 0.005 | 0.96 | -1.4833 | none       |
| CRK      | 0.716 | 0.5781 | 5.7127 | 2.22E-04 | 0.005 | 0.96 | -1.4394 | none       |
| MATN2    | 0.765 | 0.5971 | 5.7099 | 2.23E-04 | 0.005 | 0.96 | -1.4048 | none       |
| FHAD1    | 0.773 | 0.6372 | 5.7079 | 2.24E-04 | 0.005 | 0.96 | -0.8665 | none       |
| KCP      | 0.619 | 0.4547 | 5.7066 | 2.24E-04 | 0.005 | 0.95 | -1.3138 | none       |
| PAPLN    | 0.575 | 0.4504 | 5.7054 | 2.25E-04 | 0.005 | 0.95 | -1.5209 | none       |
| RBBP5    | 0.725 | 0.5372 | 5.7032 | 2.25E-04 | 0.005 | 0.95 | -1.6175 | OA-related |
| HERC2    | 0.956 | 0.7779 | 5.7001 | 2.26E-04 | 0.005 | 0.95 | -1.2527 | none       |
| UGGT2    | 0.801 | 0.5714 | 5.6978 | 2.27E-04 | 0.005 | 0.94 | -1.2155 | none       |
| ADGRD2   | 0.808 | 0.6302 | 5.6931 | 2.28E-04 | 0.005 | 0.94 | -1.3532 | none       |
| NVL      | 0.858 | 0.7227 | 5.6919 | 2.29E-04 | 0.005 | 0.93 | -1.2996 | none       |

|          |       |        |        |          |       |      |         |            |
|----------|-------|--------|--------|----------|-------|------|---------|------------|
| CLDN16   | 0.68  | 0.4879 | 5.6914 | 2.29E-04 | 0.005 | 0.93 | -1.3275 | none       |
| ELMOD3   | 0.607 | 0.462  | 5.6913 | 2.29E-04 | 0.005 | 0.93 | -1.4792 | none       |
| FAAP24   | 0.797 | 0.6701 | 5.6901 | 2.29E-04 | 0.005 | 0.93 | -1.3874 | none       |
| LETM2    | 0.728 | 0.5806 | 5.6892 | 2.30E-04 | 0.005 | 0.93 | -1.0278 | none       |
| RPS6KL1  | 0.867 | 0.7033 | 5.6862 | 2.31E-04 | 0.005 | 0.93 | -0.8781 | none       |
| TAF1B    | 0.841 | 0.6505 | 5.6824 | 2.32E-04 | 0.005 | 0.92 | -1.1189 | none       |
| OR14J1   | 0.525 | 0.4026 | 5.6809 | 2.32E-04 | 0.005 | 0.92 | -1.3686 | none       |
| ST3GAL3  | 0.817 | 0.6361 | 5.6798 | 2.33E-04 | 0.005 | 0.92 | -1.6637 | OA-related |
| SLC25A21 | 0.717 | 0.5032 | 5.6777 | 2.33E-04 | 0.005 | 0.92 | -1.2287 | none       |
| AC087651 | 0.644 | 0.4815 | 5.6771 | 2.33E-04 | 0.005 | 0.91 | -1.5646 | OA-related |
| OR5AS1   | 0.648 | 0.4982 | 5.6766 | 2.33E-04 | 0.005 | 0.91 | -1.3985 | none       |
| CTF1     | 0.655 | 0.4878 | 5.6761 | 2.34E-04 | 0.005 | 0.91 | -1.039  | none       |
| PTGES3L  | 0.987 | 0.7413 | 5.6727 | 2.35E-04 | 0.005 | 0.91 | -1.2764 | none       |
| EFCAB12  | 0.577 | 0.4482 | 5.6719 | 2.35E-04 | 0.005 | 0.91 | -1.4974 | none       |
| DCBLD2   | 1.301 | 1.0184 | 5.6716 | 2.35E-04 | 0.005 | 0.91 | -1.1769 | none       |
| TMED4    | 0.711 | 0.5067 | 5.6692 | 2.36E-04 | 0.005 | 0.9  | -1.5265 | none       |
| TTLL3    | 0.988 | 0.8195 | 5.6692 | 2.36E-04 | 0.005 | 0.9  | -1.2686 | none       |
| RICTOR   | 0.989 | 0.8279 | 5.6676 | 2.36E-04 | 0.005 | 0.9  | -1.5858 | OA-related |
| LPIN1    | 0.923 | 0.7613 | 5.664  | 2.37E-04 | 0.005 | 0.9  | -1.3412 | none       |
| GSE1     | 0.965 | 0.7996 | 5.6626 | 2.38E-04 | 0.005 | 0.9  | -1.2914 | none       |
| TTC23    | 0.874 | 0.6941 | 5.6622 | 2.38E-04 | 0.005 | 0.89 | -1.3977 | none       |
| EIF2D    | 0.603 | 0.4447 | 5.6621 | 2.38E-04 | 0.005 | 0.89 | -1.2188 | none       |
| POMZP3   | 0.732 | 0.5222 | 5.6617 | 2.38E-04 | 0.005 | 0.89 | -1.3539 | none       |
| C3ORF70  | 0.63  | 0.4694 | 5.6609 | 2.38E-04 | 0.005 | 0.89 | -1.4527 | none       |
| NAV1     | 0.648 | 0.4952 | 5.6601 | 2.39E-04 | 0.005 | 0.89 | -1.5413 | OA-related |
| PLEKHD1  | 0.629 | 0.493  | 5.6598 | 2.39E-04 | 0.005 | 0.89 | -1.5619 | OA-related |
| SEC23A   | 0.923 | 0.7438 | 5.6587 | 2.39E-04 | 0.005 | 0.89 | -1.4592 | none       |
| ETFBKMT  | 1.226 | 0.9219 | 5.6582 | 2.39E-04 | 0.005 | 0.89 | -1.1257 | none       |
| CRTAM    | 0.658 | 0.5004 | 5.6579 | 2.39E-04 | 0.005 | 0.89 | -0.7682 | none       |
| VPS11    | 0.756 | 0.6425 | 5.6574 | 2.40E-04 | 0.005 | 0.89 | -1.2985 | none       |
| KCNMB1   | 0.633 | 0.4934 | 5.6555 | 2.40E-04 | 0.005 | 0.89 | -1.5347 | OA-related |
| ULK2     | 0.896 | 0.6783 | 5.6532 | 2.41E-04 | 0.005 | 0.88 | -0.9906 | none       |
| RENBP    | 1.162 | 0.9419 | 5.653  | 2.41E-04 | 0.005 | 0.88 | -1.4403 | none       |
| CDH15    | 0.693 | 0.5088 | 5.6526 | 2.41E-04 | 0.005 | 0.88 | -1.0392 | none       |
| SPDYE5   | 1.131 | 0.9839 | 5.6525 | 2.41E-04 | 0.005 | 0.88 | -1.4073 | none       |
| ATP6V0A2 | 0.765 | 0.5491 | 5.6523 | 2.41E-04 | 0.005 | 0.88 | -1.3874 | none       |
| PHACTR1  | 0.938 | 0.7526 | 5.6513 | 2.42E-04 | 0.005 | 0.88 | -1.0711 | none       |
| AICDA    | 0.64  | 0.4618 | 5.6512 | 2.42E-04 | 0.005 | 0.88 | -1.4777 | none       |
| CDH12    | 0.814 | 0.63   | 5.6503 | 2.42E-04 | 0.005 | 0.88 | -1.4189 | none       |
| SPECC1   | 1.244 | 1.0625 | 5.6503 | 2.42E-04 | 0.005 | 0.88 | -1.5442 | OA-related |



|          |       |        |        |          |       |      |         |            |
|----------|-------|--------|--------|----------|-------|------|---------|------------|
| CHST12   | 0.674 | 0.4995 | 5.6494 | 2.42E-04 | 0.005 | 0.88 | -1.126  | none       |
| MYL10    | 0.922 | 0.7429 | 5.649  | 2.42E-04 | 0.005 | 0.88 | -1.5264 | none       |
| STIL     | 1.078 | 0.8449 | 5.6478 | 2.43E-04 | 0.005 | 0.88 | -0.854  | none       |
| DYNLT3   | 0.743 | 0.5088 | 5.6459 | 2.43E-04 | 0.005 | 0.87 | -0.9524 | none       |
| TRIM16L  | 0.761 | 0.5007 | 5.6444 | 2.44E-04 | 0.005 | 0.87 | -1.2619 | none       |
| MAGEB10  | 0.711 | 0.5557 | 5.6435 | 2.44E-04 | 0.005 | 0.87 | -1.257  | none       |
| APLP2    | 1.046 | 0.9039 | 5.6417 | 2.45E-04 | 0.005 | 0.87 | -1.3515 | none       |
| BEND2    | 0.631 | 0.479  | 5.6411 | 2.45E-04 | 0.005 | 0.87 | -1.5853 | OA-related |
| KCTD19   | 1.62  | 1.3571 | 5.6401 | 2.45E-04 | 0.005 | 0.87 | -1.1594 | none       |
| ACSS3    | 0.672 | 0.4691 | 5.6384 | 2.46E-04 | 0.005 | 0.86 | -1.2453 | none       |
| ULBP3    | 0.86  | 0.7176 | 5.638  | 2.46E-04 | 0.005 | 0.86 | -1.1618 | none       |
| SPAG7    | 0.682 | 0.5613 | 5.6349 | 2.47E-04 | 0.005 | 0.86 | -1.1521 | none       |
| MLLT10   | 1.059 | 0.8399 | 5.629  | 2.49E-04 | 0.005 | 0.85 | -1.2613 | none       |
| CCDC191  | 0.889 | 0.6646 | 5.6278 | 2.49E-04 | 0.005 | 0.85 | -0.6325 | none       |
| ZNF8     | 0.686 | 0.55   | 5.6245 | 2.50E-04 | 0.005 | 0.84 | -1.6358 | OA-related |
| RNF217   | 0.946 | 0.8761 | 5.6224 | 2.51E-04 | 0.005 | 0.84 | -0.9062 | none       |
| AXL      | 0.675 | 0.4869 | 5.6215 | 2.51E-04 | 0.005 | 0.84 | -1.2165 | none       |
| UPB1     | 0.635 | 0.4897 | 5.6194 | 2.52E-04 | 0.005 | 0.84 | -1.397  | none       |
| LEMD3    | 1.109 | 0.9238 | 5.6188 | 2.52E-04 | 0.005 | 0.84 | -1.6003 | OA-related |
| NR6A1    | 0.581 | 0.4496 | 5.6186 | 2.52E-04 | 0.005 | 0.84 | -1.5099 | none       |
| SLC48A1  | 0.625 | 0.4354 | 5.6099 | 2.55E-04 | 0.005 | 0.82 | -1.391  | none       |
| GABRA1   | 0.721 | 0.5248 | 5.609  | 2.56E-04 | 0.005 | 0.82 | -1.5343 | OA-related |
| CAPS     | 0.644 | 0.5022 | 5.6087 | 2.56E-04 | 0.005 | 0.82 | -1.4981 | none       |
| UGT1A1   | 0.545 | 0.4159 | 5.6084 | 2.56E-04 | 0.005 | 0.82 | -1.1683 | none       |
| TMC1     | 0.77  | 0.5848 | 5.6045 | 2.57E-04 | 0.005 | 0.82 | -0.9861 | none       |
| UBE2O    | 1.435 | 1.3061 | 5.6038 | 2.58E-04 | 0.005 | 0.82 | -1.276  | none       |
| THRA     | 0.693 | 0.6215 | 5.6025 | 2.58E-04 | 0.005 | 0.81 | -1.356  | none       |
| HTR3B    | 0.656 | 0.4892 | 5.6024 | 2.58E-04 | 0.005 | 0.81 | -1.5587 | OA-related |
| GRK4     | 0.84  | 0.6476 | 5.6023 | 2.58E-04 | 0.005 | 0.81 | -1.4317 | none       |
| TMEM143  | 0.583 | 0.4723 | 5.6021 | 2.58E-04 | 0.005 | 0.81 | -1.1579 | none       |
| MFSD13A  | 0.966 | 0.7604 | 5.5978 | 2.60E-04 | 0.005 | 0.81 | -1.3384 | none       |
| FAM186A  | 0.611 | 0.4876 | 5.5954 | 2.60E-04 | 0.005 | 0.81 | -1.4253 | none       |
| CYP2W1   | 0.676 | 0.4605 | 5.595  | 2.61E-04 | 0.005 | 0.8  | -1.4287 | none       |
| PPP1R13L | 1.019 | 0.8586 | 5.5943 | 2.61E-04 | 0.005 | 0.8  | -1.3172 | none       |
| DNM2     | 1.257 | 1.0872 | 5.591  | 2.62E-04 | 0.005 | 0.8  | -1.4356 | none       |
| UBE2S    | 1.06  | 0.8189 | 5.5896 | 2.63E-04 | 0.005 | 0.8  | -1.0548 | none       |
| BST1     | 0.874 | 0.6803 | 5.5895 | 2.63E-04 | 0.005 | 0.8  | -1.5453 | OA-related |
| TRNAU1A1 | 0.894 | 0.645  | 5.5888 | 2.63E-04 | 0.005 | 0.8  | -1.0141 | none       |
| TMEM119  | 0.887 | 0.6226 | 5.5883 | 2.63E-04 | 0.005 | 0.8  | -1.1882 | none       |
| HTR1D    | 0.662 | 0.5263 | 5.5881 | 2.63E-04 | 0.005 | 0.8  | -1.4943 | none       |

|               |       |        |        |          |       |      |         |            |
|---------------|-------|--------|--------|----------|-------|------|---------|------------|
| OR10A3        | 0.529 | 0.3834 | 5.5878 | 2.63E-04 | 0.005 | 0.8  | -1.535  | OA-related |
| SENP7         | 1.101 | 0.9222 | 5.587  | 2.63E-04 | 0.005 | 0.79 | -1.3346 | none       |
| CYTH4         | 0.784 | 0.6336 | 5.5796 | 2.66E-04 | 0.005 | 0.78 | -1.028  | none       |
| GOSR1         | 0.628 | 0.4758 | 5.5755 | 2.68E-04 | 0.005 | 0.78 | -1.2209 | none       |
| SDCCAG8       | 0.801 | 0.5438 | 5.5742 | 2.68E-04 | 0.005 | 0.78 | -0.9257 | none       |
| ZNF343        | 0.828 | 0.7328 | 5.5724 | 2.69E-04 | 0.005 | 0.77 | -1.1783 | none       |
| MCU           | 0.633 | 0.4123 | 5.5718 | 2.69E-04 | 0.005 | 0.77 | -0.3193 | none       |
| DPPA4         | 0.733 | 0.511  | 5.5707 | 2.69E-04 | 0.005 | 0.77 | -1.5185 | none       |
| ZNF529        | 0.984 | 0.728  | 5.5669 | 2.71E-04 | 0.005 | 0.77 | -1.388  | none       |
| ZNF670-ZNF671 | 0.599 | 0.4869 | 5.566  | 2.71E-04 | 0.005 | 0.77 | -1.318  | none       |
| ZNF799        | 1.069 | 0.8248 | 5.5622 | 2.72E-04 | 0.005 | 0.76 | -1.3358 | none       |
| ICA1L         | 0.974 | 0.8507 | 5.5611 | 2.73E-04 | 0.005 | 0.76 | -1.0447 | none       |
| ZNF776        | 1.059 | 0.8495 | 5.5599 | 2.73E-04 | 0.005 | 0.76 | -1.285  | none       |
| MFSD14C       | 0.941 | 0.8223 | 5.5595 | 2.73E-04 | 0.005 | 0.76 | -1.5033 | none       |
| GGA1          | 0.795 | 0.6709 | 5.5586 | 2.74E-04 | 0.005 | 0.76 | -1.5521 | OA-related |
| GTPBP2        | 1.128 | 0.8998 | 5.557  | 2.74E-04 | 0.005 | 0.75 | -1.1032 | none       |
| C8ORF86       | 0.798 | 0.621  | 5.5568 | 2.74E-04 | 0.005 | 0.75 | -1.2726 | none       |
| NEK9          | 0.738 | 0.5951 | 5.5556 | 2.75E-04 | 0.005 | 0.75 | -1.2935 | none       |
| RUBCN         | 1.31  | 1.1494 | 5.5551 | 2.75E-04 | 0.005 | 0.75 | -1.1965 | none       |
| OR7C1         | 0.58  | 0.4459 | 5.5541 | 2.76E-04 | 0.005 | 0.75 | -1.4625 | none       |
| ZPR1          | 0.67  | 0.5368 | 5.5528 | 2.76E-04 | 0.005 | 0.75 | -1.3823 | none       |
| MAEL          | 0.661 | 0.4677 | 5.5524 | 2.76E-04 | 0.005 | 0.75 | -1.4485 | none       |
| IQCF3         | 0.729 | 0.6414 | 5.5524 | 2.76E-04 | 0.005 | 0.75 | 0.46327 | none       |
| WFDC1         | 0.664 | 0.5226 | 5.5521 | 2.76E-04 | 0.005 | 0.75 | -1.4764 | none       |
| CATSPERG      | 0.923 | 0.7031 | 5.5509 | 2.77E-04 | 0.005 | 0.75 | -1.1993 | none       |
| FKBP6         | 0.793 | 0.6018 | 5.5494 | 2.77E-04 | 0.005 | 0.74 | -1.3782 | none       |
| PLA2G6        | 1.178 | 0.9817 | 5.5462 | 2.78E-04 | 0.005 | 0.74 | -1.0128 | none       |
| C6ORF132      | 0.991 | 0.7571 | 5.5443 | 2.79E-04 | 0.005 | 0.74 | -1.3625 | none       |
| SIGLEC6       | 0.564 | 0.4477 | 5.5435 | 2.80E-04 | 0.005 | 0.74 | -1.4175 | none       |
| TRIP4         | 0.99  | 0.7663 | 5.5434 | 2.80E-04 | 0.005 | 0.74 | -1.0387 | none       |
| NT5DC3        | 0.738 | 0.6268 | 5.5421 | 2.80E-04 | 0.005 | 0.73 | -1.5534 | OA-related |
| FAM153C       | 0.776 | 0.559  | 5.5418 | 2.80E-04 | 0.005 | 0.73 | -1.1305 | none       |
| KCNE4         | 0.937 | 0.7236 | 5.5396 | 2.81E-04 | 0.005 | 0.73 | -1.2698 | none       |
| VMAC          | 0.799 | 0.6187 | 5.5368 | 2.82E-04 | 0.005 | 0.73 | -1.3246 | none       |
| TACC2         | 0.672 | 0.4686 | 5.5367 | 2.82E-04 | 0.005 | 0.73 | -1.2972 | none       |
| ARIH1         | 1.04  | 0.787  | 5.5367 | 2.82E-04 | 0.005 | 0.73 | -1.2281 | none       |
| MIER2         | 1.06  | 0.9221 | 5.5361 | 2.82E-04 | 0.005 | 0.73 | -1.2998 | none       |
| KCTD6         | 0.66  | 0.429  | 5.5361 | 2.82E-04 | 0.005 | 0.73 | -1.0366 | none       |
| RNF4          | 0.49  | 0.3606 | 5.5357 | 2.82E-04 | 0.005 | 0.72 | -1.2391 | none       |
| ZNF563        | 0.483 | 0.3512 | 5.5353 | 2.83E-04 | 0.005 | 0.72 | -0.9393 | none       |

|          |       |        |        |          |       |      |         |            |
|----------|-------|--------|--------|----------|-------|------|---------|------------|
| TMEM156  | 0.775 | 0.5711 | 5.5347 | 2.83E-04 | 0.005 | 0.72 | -1.257  | none       |
| OPRD1    | 0.576 | 0.4116 | 5.5306 | 2.84E-04 | 0.005 | 0.72 | -1.5261 | none       |
| ELF3     | 1.261 | 1.05   | 5.5267 | 2.86E-04 | 0.005 | 0.71 | -1.381  | none       |
| ZNF490   | 0.872 | 0.7122 | 5.5253 | 2.87E-04 | 0.005 | 0.71 | -1.3032 | none       |
| PPFIA1   | 1.432 | 1.3241 | 5.5237 | 2.87E-04 | 0.005 | 0.71 | -1.2214 | none       |
| SLC51A   | 1.058 | 0.8914 | 5.5208 | 2.88E-04 | 0.005 | 0.7  | -0.915  | none       |
| PPP1R27  | 0.638 | 0.4264 | 5.5205 | 2.88E-04 | 0.005 | 0.7  | -0.9255 | none       |
| CCDC158  | 0.739 | 0.5169 | 5.5137 | 2.91E-04 | 0.005 | 0.7  | -1.5629 | OA-related |
| MED17    | 0.566 | 0.4118 | 5.5132 | 2.91E-04 | 0.005 | 0.69 | -1.4757 | none       |
| TESMIN   | 1.138 | 0.8157 | 5.5113 | 2.92E-04 | 0.005 | 0.69 | -1.461  | none       |
| KDM2A    | 1.153 | 1.03   | 5.5111 | 2.92E-04 | 0.005 | 0.69 | -1.4369 | none       |
| FAM13A   | 0.626 | 0.5427 | 5.5103 | 2.92E-04 | 0.005 | 0.69 | -0.9158 | none       |
| PKD2L2   | 1.212 | 1.0036 | 5.5102 | 2.92E-04 | 0.005 | 0.69 | -1.2224 | none       |
| ALDH6A1  | 0.692 | 0.5297 | 5.5081 | 2.93E-04 | 0.005 | 0.69 | -1.5778 | OA-related |
| EPS15L1  | 0.931 | 0.8106 | 5.5064 | 2.94E-04 | 0.005 | 0.69 | -1.2239 | none       |
| ZFAND3   | 1.001 | 0.8436 | 5.5064 | 2.94E-04 | 0.005 | 0.69 | -1.1269 | none       |
| APOBEC3A | 0.829 | 0.6518 | 5.5063 | 2.94E-04 | 0.005 | 0.69 | -1.4302 | none       |
| C8ORF34  | 0.777 | 0.5878 | 5.5048 | 2.95E-04 | 0.005 | 0.68 | -1.4136 | none       |
| NUP160   | 0.631 | 0.4671 | 5.504  | 2.95E-04 | 0.005 | 0.68 | -1.4964 | none       |
| PAEP     | 0.937 | 0.7102 | 5.5022 | 2.96E-04 | 0.005 | 0.68 | -1.1798 | none       |
| ZSCAN5A  | 0.92  | 0.7283 | 5.4995 | 2.97E-04 | 0.005 | 0.68 | -1.5819 | OA-related |
| ARNT     | 1.054 | 0.8933 | 5.4962 | 2.98E-04 | 0.005 | 0.67 | -1.1071 | none       |
| NME6     | 0.531 | 0.358  | 5.4904 | 3.00E-04 | 0.005 | 0.66 | -1.2983 | none       |
| LRRC37A3 | 1.175 | 1.0013 | 5.4883 | 3.01E-04 | 0.005 | 0.66 | -1.043  | none       |
| DOCK7    | 0.871 | 0.6817 | 5.4876 | 3.02E-04 | 0.005 | 0.66 | -1.1471 | none       |
| EMP2     | 0.639 | 0.4917 | 5.4875 | 3.02E-04 | 0.005 | 0.66 | -1.5015 | none       |
| TANGO2   | 1.062 | 0.8478 | 5.4866 | 3.02E-04 | 0.005 | 0.66 | -1.4343 | none       |
| PROSER3  | 0.887 | 0.7839 | 5.486  | 3.02E-04 | 0.005 | 0.66 | -1.4001 | none       |
| IZUMO1   | 0.574 | 0.4144 | 5.4848 | 3.03E-04 | 0.005 | 0.66 | -1.4265 | none       |
| MYO3B    | 0.556 | 0.3859 | 5.4835 | 3.03E-04 | 0.005 | 0.65 | -1.3893 | none       |
| IGF2BP1  | 1.016 | 0.8548 | 5.4819 | 3.04E-04 | 0.005 | 0.65 | -1.0436 | none       |
| RBSN     | 0.916 | 0.7232 | 5.4795 | 3.05E-04 | 0.005 | 0.65 | -1.5407 | OA-related |
| P4HTM    | 0.761 | 0.5883 | 5.4791 | 3.05E-04 | 0.005 | 0.65 | -1.2491 | none       |
| SGK3     | 0.766 | 0.5745 | 5.4789 | 3.05E-04 | 0.005 | 0.65 | -1.2292 | none       |
| ZNF483   | 0.724 | 0.496  | 5.4774 | 3.06E-04 | 0.005 | 0.65 | -1.3699 | none       |
| AKR1B10  | 0.73  | 0.4994 | 5.4757 | 3.07E-04 | 0.005 | 0.64 | -1.0954 | none       |
| CHD2     | 0.933 | 0.7123 | 5.4752 | 3.07E-04 | 0.005 | 0.64 | -1.2912 | none       |
| ZNF81    | 1.092 | 0.9348 | 5.4728 | 3.08E-04 | 0.005 | 0.64 | -1.2911 | none       |
| MBD5     | 0.592 | 0.4251 | 5.4696 | 3.09E-04 | 0.005 | 0.64 | -1.1357 | none       |
| CDH8     | 0.64  | 0.4816 | 5.4694 | 3.09E-04 | 0.005 | 0.63 | -1.4641 | none       |

|           |       |        |        |          |       |      |         |            |
|-----------|-------|--------|--------|----------|-------|------|---------|------------|
| GNAL      | 0.722 | 0.5923 | 5.4693 | 3.09E-04 | 0.005 | 0.63 | -1.5096 | none       |
| ZDHHC17   | 0.631 | 0.5169 | 5.4669 | 3.10E-04 | 0.005 | 0.63 | -0.7815 | none       |
| PCBD2     | 0.798 | 0.6153 | 5.4668 | 3.10E-04 | 0.005 | 0.63 | -1.4217 | none       |
| MAPK1IP1  | 0.625 | 0.4307 | 5.4657 | 3.11E-04 | 0.005 | 0.63 | -1.2488 | none       |
| PGA3      | 0.726 | 0.5808 | 5.4642 | 3.11E-04 | 0.005 | 0.63 | -1.1381 | none       |
| CCDC69    | 0.766 | 0.6034 | 5.4612 | 3.13E-04 | 0.005 | 0.62 | -1.299  | none       |
| ZNF611    | 1.168 | 0.9709 | 5.461  | 3.13E-04 | 0.005 | 0.62 | -1.2405 | none       |
| MED13     | 1.11  | 0.9019 | 5.4529 | 3.16E-04 | 0.006 | 0.61 | -1.417  | none       |
| TTPAL     | 0.611 | 0.4995 | 5.4525 | 3.16E-04 | 0.006 | 0.61 | -1.4902 | none       |
| ABCD4     | 0.558 | 0.4373 | 5.4514 | 3.17E-04 | 0.006 | 0.61 | -1.5226 | none       |
| CNKSR1    | 0.921 | 0.6543 | 5.4492 | 3.18E-04 | 0.006 | 0.61 | -0.9522 | none       |
| TMSB15B   | 0.629 | 0.4668 | 5.4489 | 3.18E-04 | 0.006 | 0.61 | -0.8504 | none       |
| BRWD1     | 0.791 | 0.5935 | 5.4446 | 3.20E-04 | 0.006 | 0.6  | -1.3759 | none       |
| PLPP7     | 0.575 | 0.4159 | 5.4413 | 3.21E-04 | 0.006 | 0.6  | -1.2215 | none       |
| TCFL5     | 0.963 | 0.7963 | 5.4404 | 3.22E-04 | 0.006 | 0.6  | -1.6076 | OA-related |
| ANKS4B    | 0.492 | 0.3487 | 5.4401 | 3.22E-04 | 0.006 | 0.59 | -1.5568 | OA-related |
| EML2      | 0.713 | 0.6647 | 5.4385 | 3.23E-04 | 0.006 | 0.59 | -0.7926 | none       |
| BCL2L14   | 0.638 | 0.4905 | 5.4375 | 3.23E-04 | 0.006 | 0.59 | -1.2575 | none       |
| DNAH14    | 1.097 | 0.9846 | 5.4359 | 3.24E-04 | 0.006 | 0.59 | -0.348  | none       |
| SCN1B     | 0.722 | 0.5501 | 5.4341 | 3.25E-04 | 0.006 | 0.59 | -1.3605 | none       |
| GFRAL     | 0.69  | 0.4966 | 5.433  | 3.25E-04 | 0.006 | 0.59 | -0.9633 | none       |
| ING5      | 0.906 | 0.7836 | 5.4302 | 3.26E-04 | 0.006 | 0.58 | -1.4546 | none       |
| SLC2A13   | 0.684 | 0.4869 | 5.4299 | 3.26E-04 | 0.006 | 0.58 | -0.838  | none       |
| ZNF891    | 0.71  | 0.5654 | 5.4288 | 3.27E-04 | 0.006 | 0.58 | -1.517  | none       |
| METTL6    | 0.583 | 0.3747 | 5.4286 | 3.27E-04 | 0.006 | 0.58 | -1.33   | none       |
| AL589743. | 1.151 | 0.85   | 5.4271 | 3.28E-04 | 0.006 | 0.58 | -1.1162 | none       |
| LIPC      | 0.712 | 0.5384 | 5.4254 | 3.28E-04 | 0.006 | 0.57 | -1.0703 | none       |
| SLC13A5   | 0.753 | 0.5859 | 5.425  | 3.29E-04 | 0.006 | 0.57 | -1.4901 | none       |
| SNX11     | 0.821 | 0.5665 | 5.424  | 3.29E-04 | 0.006 | 0.57 | -1.3565 | none       |
| MACC1     | 0.889 | 0.6319 | 5.423  | 3.30E-04 | 0.006 | 0.57 | -1.09   | none       |
| BMP1      | 0.967 | 0.8205 | 5.423  | 3.30E-04 | 0.006 | 0.57 | -1.4622 | none       |
| IDH3A     | 0.472 | 0.2626 | 5.4226 | 3.30E-04 | 0.006 | 0.57 | -0.7793 | none       |
| FAT1      | 1.017 | 0.845  | 5.4215 | 3.30E-04 | 0.006 | 0.57 | -0.54   | none       |
| RUFY3     | 0.903 | 0.7732 | 5.42   | 3.31E-04 | 0.006 | 0.57 | -1.1305 | none       |
| NANOG     | 0.61  | 0.4744 | 5.417  | 3.32E-04 | 0.006 | 0.56 | -1.2151 | none       |
| SAG       | 0.692 | 0.5003 | 5.4168 | 3.32E-04 | 0.006 | 0.56 | -1.5169 | none       |
| NPLOC4    | 0.642 | 0.4767 | 5.4165 | 3.33E-04 | 0.006 | 0.56 | -1.4287 | none       |
| BEST1     | 0.695 | 0.5109 | 5.4128 | 3.34E-04 | 0.006 | 0.56 | -1.2944 | none       |
| ZNF714    | 0.896 | 0.7375 | 5.4121 | 3.35E-04 | 0.006 | 0.56 | -1.6662 | OA-related |
| C2CD3     | 1.041 | 0.9415 | 5.4103 | 3.35E-04 | 0.006 | 0.55 | -1.2527 | none       |

|           |       |        |        |          |       |      |         |            |
|-----------|-------|--------|--------|----------|-------|------|---------|------------|
| HNF1A     | 0.482 | 0.3806 | 5.409  | 3.36E-04 | 0.006 | 0.55 | -0.7203 | none       |
| LRRC57    | 0.77  | 0.6263 | 5.4084 | 3.36E-04 | 0.006 | 0.55 | -1.5308 | none       |
| IL18      | 0.726 | 0.6189 | 5.4083 | 3.36E-04 | 0.006 | 0.55 | -0.4811 | none       |
| OR3A3     | 0.529 | 0.3967 | 5.408  | 3.36E-04 | 0.006 | 0.55 | -1.529  | none       |
| NUPR1     | 0.814 | 0.6281 | 5.4058 | 3.37E-04 | 0.006 | 0.55 | -1.5191 | none       |
| SSH2      | 0.68  | 0.5298 | 5.4046 | 3.38E-04 | 0.006 | 0.55 | -1.5324 | OA-related |
| GPLD1     | 0.929 | 0.7693 | 5.4038 | 3.38E-04 | 0.006 | 0.55 | -1.1501 | none       |
| C2ORF88   | 0.625 | 0.4635 | 5.4038 | 3.38E-04 | 0.006 | 0.54 | -0.6578 | none       |
| PRKCZ     | 0.915 | 0.7828 | 5.4034 | 3.39E-04 | 0.006 | 0.54 | -1.0177 | none       |
| ZWILCH    | 0.764 | 0.5196 | 5.4018 | 3.39E-04 | 0.006 | 0.54 | -1.033  | none       |
| CCDC27    | 0.673 | 0.5109 | 5.3992 | 3.41E-04 | 0.006 | 0.54 | -1.427  | none       |
| SRGAP3    | 0.751 | 0.601  | 5.3956 | 3.42E-04 | 0.006 | 0.53 | -1.4239 | none       |
| NDST1     | 0.917 | 0.7954 | 5.394  | 3.43E-04 | 0.006 | 0.53 | -1.2988 | none       |
| CSTL1     | 1.278 | 1.0664 | 5.3932 | 3.43E-04 | 0.006 | 0.53 | -0.6395 | none       |
| MNT       | 1.025 | 0.9168 | 5.3921 | 3.44E-04 | 0.006 | 0.53 | -0.974  | none       |
| DNAJC22   | 0.674 | 0.4921 | 5.3898 | 3.45E-04 | 0.006 | 0.53 | -1.3143 | none       |
| HEATR6    | 1.081 | 0.8793 | 5.3884 | 3.46E-04 | 0.006 | 0.52 | -1.5534 | OA-related |
| CDKL5     | 0.744 | 0.5796 | 5.3876 | 3.46E-04 | 0.006 | 0.52 | -1.4973 | none       |
| PIF1      | 0.837 | 0.7071 | 5.3876 | 3.46E-04 | 0.006 | 0.52 | -1.2197 | none       |
| KLHDC10   | 1.359 | 1.1382 | 5.387  | 3.46E-04 | 0.006 | 0.52 | -0.6061 | none       |
| CHFR      | 0.831 | 0.6801 | 5.3854 | 3.47E-04 | 0.006 | 0.52 | -1.484  | none       |
| SLC35E1   | 0.912 | 0.7864 | 5.3843 | 3.48E-04 | 0.006 | 0.52 | -1.1719 | none       |
| MANSC1    | 0.537 | 0.3851 | 5.3825 | 3.49E-04 | 0.006 | 0.52 | -1.5696 | OA-related |
| MXRA7     | 0.666 | 0.41   | 5.3824 | 3.49E-04 | 0.006 | 0.52 | -1.221  | none       |
| VWA2      | 0.648 | 0.486  | 5.3823 | 3.49E-04 | 0.006 | 0.52 | -1.5221 | none       |
| RBFOX3    | 0.705 | 0.5686 | 5.3821 | 3.49E-04 | 0.006 | 0.52 | -1.4335 | none       |
| FEZ1      | 0.964 | 0.7893 | 5.3817 | 3.49E-04 | 0.006 | 0.51 | -1.3266 | none       |
| ARGFX     | 0.703 | 0.5362 | 5.3797 | 3.50E-04 | 0.006 | 0.51 | -1.6092 | OA-related |
| COL1A1    | 1.002 | 0.7216 | 5.3797 | 3.50E-04 | 0.006 | 0.51 | -1.1237 | none       |
| P2RX5-TA) | 0.679 | 0.5293 | 5.3786 | 3.50E-04 | 0.006 | 0.51 | -1.5793 | OA-related |
| DHTKD1    | 0.832 | 0.7065 | 5.3766 | 3.51E-04 | 0.006 | 0.51 | -0.8344 | none       |
| IDO2      | 0.635 | 0.4546 | 5.3756 | 3.52E-04 | 0.006 | 0.51 | -1.5105 | none       |
| IRF9      | 0.596 | 0.4391 | 5.3714 | 3.54E-04 | 0.006 | 0.5  | -1.1007 | none       |
| CCPG1     | 1.136 | 0.957  | 5.3713 | 3.54E-04 | 0.006 | 0.5  | -1.161  | none       |
| ALPP      | 0.508 | 0.3985 | 5.3706 | 3.54E-04 | 0.006 | 0.5  | -0.5727 | none       |
| MIGA1     | 0.647 | 0.4848 | 5.3674 | 3.56E-04 | 0.006 | 0.49 | -1.4479 | none       |
| PAQR7     | 0.608 | 0.4569 | 5.3652 | 3.57E-04 | 0.006 | 0.49 | -1.4952 | none       |
| PLXDC1    | 0.863 | 0.6622 | 5.3643 | 3.57E-04 | 0.006 | 0.49 | -0.8094 | none       |
| PLPP2     | 0.718 | 0.5279 | 5.3637 | 3.58E-04 | 0.006 | 0.49 | -1.4533 | none       |
| EOGT      | 0.673 | 0.5472 | 5.3636 | 3.58E-04 | 0.006 | 0.49 | -0.5667 | none       |

|         |       |        |        |          |       |      |         |            |
|---------|-------|--------|--------|----------|-------|------|---------|------------|
| PRKAB1  | 0.578 | 0.46   | 5.3619 | 3.59E-04 | 0.006 | 0.49 | -1.3913 | none       |
| 14-Sep  | 1.019 | 0.7642 | 5.361  | 3.59E-04 | 0.006 | 0.49 | -1.1425 | none       |
| RHBG    | 0.842 | 0.6657 | 5.3604 | 3.59E-04 | 0.006 | 0.49 | -1.3882 | none       |
| PCDH11Y | 0.47  | 0.3438 | 5.3603 | 3.59E-04 | 0.006 | 0.49 | -1.3884 | none       |
| TRIM58  | 0.586 | 0.4201 | 5.3596 | 3.60E-04 | 0.006 | 0.48 | -1.5862 | OA-related |
| SLC7A7  | 1.222 | 0.9944 | 5.3593 | 3.60E-04 | 0.006 | 0.48 | -1.1648 | none       |
| HKR1    | 1.004 | 0.8503 | 5.358  | 3.61E-04 | 0.006 | 0.48 | -1.535  | OA-related |
| CABYR   | 1.024 | 0.8202 | 5.3536 | 3.63E-04 | 0.006 | 0.48 | -1.0482 | none       |
| ATP9B   | 0.802 | 0.7224 | 5.3536 | 3.63E-04 | 0.006 | 0.48 | -1.1766 | none       |
| TBX6    | 0.715 | 0.5276 | 5.352  | 3.64E-04 | 0.006 | 0.47 | -1.4699 | none       |
| KIRREL3 | 0.752 | 0.5515 | 5.3517 | 3.64E-04 | 0.006 | 0.47 | -1.2694 | none       |
| ERBB2   | 1.305 | 1.005  | 5.3512 | 3.64E-04 | 0.006 | 0.47 | -1.3338 | none       |
| TRPV3   | 0.624 | 0.5198 | 5.3507 | 3.64E-04 | 0.006 | 0.47 | -1.4994 | none       |
| CD34    | 0.553 | 0.4056 | 5.3505 | 3.64E-04 | 0.006 | 0.47 | -1.4653 | none       |
| ANGPT2  | 0.725 | 0.5578 | 5.3497 | 3.65E-04 | 0.006 | 0.47 | -1.4994 | none       |
| TCTN1   | 0.638 | 0.4819 | 5.348  | 3.66E-04 | 0.006 | 0.47 | -1.0925 | none       |
| CPT1B   | 0.779 | 0.75   | 5.3447 | 3.67E-04 | 0.006 | 0.46 | -0.1266 | none       |
| IFT20   | 0.682 | 0.4587 | 5.3399 | 3.70E-04 | 0.006 | 0.46 | -1.0988 | none       |
| ATP8B3  | 0.663 | 0.5043 | 5.3398 | 3.70E-04 | 0.006 | 0.46 | -0.8703 | none       |
| SLC4A8  | 0.936 | 0.6679 | 5.3393 | 3.70E-04 | 0.006 | 0.46 | -1.2722 | none       |
| EMCN    | 0.82  | 0.6895 | 5.3392 | 3.70E-04 | 0.006 | 0.46 | -0.9119 | none       |
| RELN    | 0.965 | 0.6761 | 5.332  | 3.74E-04 | 0.006 | 0.45 | -1.2532 | none       |
| SIPA1L3 | 1.317 | 1.1995 | 5.3307 | 3.74E-04 | 0.006 | 0.44 | -1.4183 | none       |
| NRBP1   | 0.695 | 0.4904 | 5.3288 | 3.75E-04 | 0.006 | 0.44 | -1.4094 | none       |
| GGT5    | 0.615 | 0.4777 | 5.3276 | 3.76E-04 | 0.006 | 0.44 | -0.9369 | none       |
| SLC1A4  | 0.731 | 0.5499 | 5.3245 | 3.78E-04 | 0.006 | 0.44 | -1.3279 | none       |
| HACD2   | 0.796 | 0.568  | 5.3239 | 3.78E-04 | 0.006 | 0.43 | -0.9403 | none       |
| DDX25   | 0.736 | 0.5394 | 5.3231 | 3.78E-04 | 0.006 | 0.43 | -1.2619 | none       |
| TYW5    | 0.483 | 0.3511 | 5.3212 | 3.79E-04 | 0.006 | 0.43 | -1.4314 | none       |
| ACSL6   | 0.728 | 0.571  | 5.3208 | 3.80E-04 | 0.006 | 0.43 | -1.5685 | OA-related |
| ETS1    | 0.868 | 0.7174 | 5.3199 | 3.80E-04 | 0.006 | 0.43 | -1.46   | none       |
| GOLM1   | 1.162 | 1.0401 | 5.3195 | 3.80E-04 | 0.006 | 0.43 | -0.992  | none       |
| PSPH    | 0.828 | 0.5947 | 5.318  | 3.81E-04 | 0.006 | 0.43 | -1.28   | none       |
| DDHD1   | 1.128 | 0.9453 | 5.315  | 3.83E-04 | 0.006 | 0.42 | -1.5848 | OA-related |
| PDLIM3  | 0.756 | 0.6112 | 5.3149 | 3.83E-04 | 0.006 | 0.42 | -1.5037 | none       |
| PSPN    | 0.67  | 0.5569 | 5.3141 | 3.83E-04 | 0.006 | 0.42 | -1.6061 | OA-related |
| LGALS4  | 0.535 | 0.3531 | 5.3104 | 3.85E-04 | 0.006 | 0.42 | -1.3168 | none       |
| ALDOB   | 0.653 | 0.514  | 5.3098 | 3.85E-04 | 0.006 | 0.42 | -1.0999 | none       |
| ARMC9   | 0.8   | 0.6161 | 5.3094 | 3.86E-04 | 0.006 | 0.41 | -1.0924 | none       |
| SGIP1   | 0.623 | 0.4253 | 5.3092 | 3.86E-04 | 0.006 | 0.41 | 0.44284 | none       |

|          |       |        |        |          |       |      |         |            |
|----------|-------|--------|--------|----------|-------|------|---------|------------|
| TRMT12   | 0.765 | 0.5542 | 5.308  | 3.86E-04 | 0.006 | 0.41 | -0.2928 | none       |
| ZNF382   | 0.959 | 0.8212 | 5.308  | 3.86E-04 | 0.006 | 0.41 | -1.2958 | none       |
| ZNF667   | 0.648 | 0.5239 | 5.3073 | 3.87E-04 | 0.006 | 0.41 | -1.4806 | none       |
| RBMS2    | 1.017 | 0.8099 | 5.3065 | 3.87E-04 | 0.006 | 0.41 | -1.0379 | none       |
| ENTPD1   | 0.765 | 0.5799 | 5.3034 | 3.89E-04 | 0.006 | 0.41 | -1.1545 | none       |
| AK1      | 0.648 | 0.5923 | 5.3022 | 3.90E-04 | 0.006 | 0.4  | -0.3204 | none       |
| NDEL1    | 0.639 | 0.5017 | 5.3016 | 3.90E-04 | 0.006 | 0.4  | -1.0586 | none       |
| TTC19    | 0.832 | 0.6731 | 5.2991 | 3.91E-04 | 0.006 | 0.4  | -1.1982 | none       |
| RHOBTB3  | 0.574 | 0.4246 | 5.2958 | 3.93E-04 | 0.006 | 0.4  | -0.3489 | none       |
| MTBP     | 0.772 | 0.593  | 5.2933 | 3.94E-04 | 0.006 | 0.39 | -1.414  | none       |
| CCDC88A  | 0.93  | 0.7614 | 5.2889 | 3.97E-04 | 0.006 | 0.39 | -1.2016 | none       |
| IFT74    | 1.106 | 0.9501 | 5.2848 | 3.99E-04 | 0.006 | 0.38 | -1.481  | none       |
| SLC25A30 | 0.687 | 0.4439 | 5.2831 | 4.00E-04 | 0.006 | 0.38 | -1.0697 | none       |
| CHEK2    | 0.635 | 0.4003 | 5.2826 | 4.00E-04 | 0.006 | 0.38 | -1.0337 | none       |
| SLC38A6  | 0.889 | 0.6562 | 5.2819 | 4.01E-04 | 0.006 | 0.38 | -0.7817 | none       |
| QPRT     | 0.713 | 0.5482 | 5.2807 | 4.01E-04 | 0.006 | 0.37 | -1.6385 | OA-related |
| MOAP1    | 0.524 | 0.3884 | 5.2747 | 4.05E-04 | 0.006 | 0.37 | -0.8285 | none       |
| LRTOMT   | 1.015 | 0.8266 | 5.2701 | 4.07E-04 | 0.006 | 0.36 | -0.7502 | none       |
| TMEM191  | 0.75  | 0.5195 | 5.2701 | 4.07E-04 | 0.006 | 0.36 | -1.3387 | none       |
| CHI3L1   | 0.511 | 0.407  | 5.2698 | 4.08E-04 | 0.006 | 0.36 | -1.3726 | none       |
| TRMT2B   | 0.538 | 0.4141 | 5.2689 | 4.08E-04 | 0.006 | 0.36 | -1.2727 | none       |
| PKD1L1   | 0.676 | 0.5025 | 5.2657 | 4.10E-04 | 0.006 | 0.35 | -1.6526 | OA-related |
| CHMP4C   | 0.851 | 0.6804 | 5.2656 | 4.10E-04 | 0.006 | 0.35 | -1.3923 | none       |
| XRRA1    | 1.057 | 0.9049 | 5.2654 | 4.10E-04 | 0.006 | 0.35 | -1.2552 | none       |
| RNF222   | 0.609 | 0.4459 | 5.2645 | 4.11E-04 | 0.006 | 0.35 | -1.4003 | none       |
| ARL9     | 0.63  | 0.4636 | 5.2633 | 4.11E-04 | 0.006 | 0.35 | -1.5268 | none       |
| TLR5     | 1.049 | 0.808  | 5.2607 | 4.13E-04 | 0.006 | 0.35 | -0.963  | none       |
| CYP4B1   | 1.074 | 0.8649 | 5.2567 | 4.15E-04 | 0.006 | 0.34 | -1.3867 | none       |
| VSIG10   | 0.945 | 0.6805 | 5.2557 | 4.16E-04 | 0.006 | 0.34 | -1.3157 | none       |
| VTI1A    | 0.771 | 0.5334 | 5.2553 | 4.16E-04 | 0.006 | 0.34 | -1.333  | none       |
| RBMS1    | 0.818 | 0.6759 | 5.2531 | 4.17E-04 | 0.006 | 0.34 | -1.2031 | none       |
| C19ORF54 | 0.618 | 0.5574 | 5.2467 | 4.21E-04 | 0.006 | 0.33 | -1.3309 | none       |
| NPHP1    | 0.746 | 0.607  | 5.2446 | 4.22E-04 | 0.006 | 0.32 | -1.2939 | none       |
| LPCAT3   | 0.72  | 0.5372 | 5.2445 | 4.22E-04 | 0.006 | 0.32 | -0.898  | none       |
| ARHGEF1C | 0.657 | 0.5039 | 5.2442 | 4.23E-04 | 0.006 | 0.32 | -1.4499 | none       |
| CETP     | 0.625 | 0.5283 | 5.2433 | 4.23E-04 | 0.006 | 0.32 | -1.2769 | none       |
| OR2A25   | 0.833 | 0.5935 | 5.2431 | 4.23E-04 | 0.006 | 0.32 | -1.1399 | none       |
| FADS1    | 0.789 | 0.6961 | 5.2428 | 4.23E-04 | 0.006 | 0.32 | -0.6932 | none       |
| BLMH     | 0.823 | 0.6413 | 5.2421 | 4.24E-04 | 0.006 | 0.32 | -1.3717 | none       |
| CACNB2   | 0.682 | 0.5101 | 5.2397 | 4.25E-04 | 0.006 | 0.32 | -1.1453 | none       |

|          |       |        |        |          |       |      |         |            |
|----------|-------|--------|--------|----------|-------|------|---------|------------|
| EXOSC6   | 0.779 | 0.597  | 5.2396 | 4.25E-04 | 0.006 | 0.32 | -1.6636 | OA-related |
| ANXA13   | 0.623 | 0.4431 | 5.2355 | 4.28E-04 | 0.006 | 0.31 | -1.5062 | none       |
| SPIN3    | 0.653 | 0.5219 | 5.2348 | 4.28E-04 | 0.006 | 0.31 | -1.4735 | none       |
| MEIOC    | 0.814 | 0.6729 | 5.2326 | 0.00043  | 0.006 | 0.31 | -1.4758 | none       |
| LDLR     | 1.061 | 1.0148 | 5.2319 | 4.30E-04 | 0.006 | 0.31 | -1.2113 | none       |
| ARFGAP2  | 0.623 | 0.4711 | 5.2294 | 4.31E-04 | 0.006 | 0.3  | -1.2369 | none       |
| DNASE1   | 0.941 | 0.8348 | 5.2291 | 4.32E-04 | 0.006 | 0.3  | -1.2879 | none       |
| TRAPPC8  | 1.184 | 1.0341 | 5.2291 | 4.32E-04 | 0.006 | 0.3  | -1.3002 | none       |
| LRRC34   | 0.689 | 0.5252 | 5.229  | 4.32E-04 | 0.006 | 0.3  | -1.1954 | none       |
| PRELP    | 0.517 | 0.4056 | 5.229  | 4.32E-04 | 0.006 | 0.3  | -1.6521 | OA-related |
| AGBL4    | 0.506 | 0.3776 | 5.2264 | 4.33E-04 | 0.006 | 0.3  | -1.3412 | none       |
| CRX      | 0.708 | 0.5156 | 5.225  | 4.34E-04 | 0.006 | 0.3  | -1.5057 | none       |
| BEST2    | 1.112 | 0.8668 | 5.2214 | 4.36E-04 | 0.007 | 0.29 | -1.4229 | none       |
| PTPN3    | 0.892 | 0.6933 | 5.2207 | 4.37E-04 | 0.007 | 0.29 | -1.4831 | none       |
| SYTL2    | 0.908 | 0.6771 | 5.2204 | 4.37E-04 | 0.007 | 0.29 | -1.1067 | none       |
| ATXN3    | 0.845 | 0.6632 | 5.2201 | 4.37E-04 | 0.007 | 0.29 | -1.4956 | none       |
| ISPD     | 0.814 | 0.6529 | 5.2197 | 4.37E-04 | 0.007 | 0.29 | -1.2943 | none       |
| BCL11A   | 0.483 | 0.334  | 5.2195 | 4.37E-04 | 0.007 | 0.29 | -1.577  | OA-related |
| ARSK     | 0.863 | 0.6649 | 5.2168 | 4.39E-04 | 0.007 | 0.29 | -1.2771 | none       |
| STPG1    | 0.754 | 0.6159 | 5.2166 | 4.39E-04 | 0.007 | 0.29 | -1.3377 | none       |
| PODN     | 0.738 | 0.5527 | 5.2153 | 4.40E-04 | 0.007 | 0.28 | -1.0514 | none       |
| BOD1L1   | 1.062 | 0.9784 | 5.2092 | 4.44E-04 | 0.007 | 0.27 | -1.3298 | none       |
| TLL2     | 0.789 | 0.6053 | 5.2059 | 4.46E-04 | 0.007 | 0.27 | -0.9487 | none       |
| ZNF154   | 0.657 | 0.4939 | 5.205  | 4.46E-04 | 0.007 | 0.27 | -1.4966 | none       |
| SLC2A5   | 0.546 | 0.4241 | 5.2048 | 4.47E-04 | 0.007 | 0.27 | -1.2132 | none       |
| C4ORF19  | 1.023 | 0.8276 | 5.2044 | 4.47E-04 | 0.007 | 0.27 | -1.2565 | none       |
| SEC14L3  | 0.442 | 0.3238 | 5.2024 | 4.48E-04 | 0.007 | 0.27 | -1.3412 | none       |
| SZT2     | 0.736 | 0.6329 | 5.2011 | 4.49E-04 | 0.007 | 0.26 | -1.4688 | none       |
| GVQW2    | 1.916 | 1.5815 | 5.2001 | 4.50E-04 | 0.007 | 0.26 | -0.8564 | none       |
| PBX3     | 0.62  | 0.4461 | 5.1991 | 4.50E-04 | 0.007 | 0.26 | -0.6384 | none       |
| ASB3     | 0.499 | 0.3187 | 5.199  | 4.50E-04 | 0.007 | 0.26 | -1.3399 | none       |
| CCDC157  | 0.583 | 0.4037 | 5.1987 | 4.50E-04 | 0.007 | 0.26 | -1.3567 | none       |
| ATP1B2   | 0.51  | 0.443  | 5.1986 | 4.50E-04 | 0.007 | 0.26 | -0.038  | none       |
| PUS3     | 0.67  | 0.5257 | 5.1981 | 4.51E-04 | 0.007 | 0.26 | -0.9749 | none       |
| CCDC57   | 0.909 | 0.6515 | 5.1977 | 4.51E-04 | 0.007 | 0.26 | -0.9726 | none       |
| PDE6A    | 0.633 | 0.4682 | 5.1968 | 4.52E-04 | 0.007 | 0.26 | -1.4172 | none       |
| NAV2     | 1.339 | 1.0086 | 5.1958 | 4.52E-04 | 0.007 | 0.26 | -1.0616 | none       |
| ARHGEF12 | 0.771 | 0.5639 | 5.1952 | 4.53E-04 | 0.007 | 0.25 | -1.0309 | none       |
| ZNF431   | 1.112 | 0.9077 | 5.1945 | 4.53E-04 | 0.007 | 0.25 | -1.3122 | none       |
| LRCH3    | 1.022 | 0.8971 | 5.1943 | 4.53E-04 | 0.007 | 0.25 | -1.406  | none       |



|          |       |        |        |          |       |      |         |            |
|----------|-------|--------|--------|----------|-------|------|---------|------------|
| PUS1     | 0.675 | 0.5775 | 5.1915 | 4.55E-04 | 0.007 | 0.25 | -1.5373 | OA-related |
| SVOP     | 0.588 | 0.4452 | 5.1907 | 4.55E-04 | 0.007 | 0.25 | -1.1886 | none       |
| NAA16    | 0.922 | 0.8142 | 5.1878 | 4.57E-04 | 0.007 | 0.24 | -0.9027 | none       |
| ARHGAP28 | 0.693 | 0.5092 | 5.1869 | 4.58E-04 | 0.007 | 0.24 | -1.404  | none       |
| SLC38A3  | 1.259 | 0.9267 | 5.1868 | 4.58E-04 | 0.007 | 0.24 | -0.0073 | none       |
| C2ORF74  | 0.628 | 0.5026 | 5.1859 | 4.59E-04 | 0.007 | 0.24 | -1.2029 | none       |
| NCKAP5L  | 0.866 | 0.7162 | 5.1844 | 4.60E-04 | 0.007 | 0.24 | -1.3634 | none       |
| ENO3     | 0.964 | 0.8884 | 5.1832 | 4.60E-04 | 0.007 | 0.24 | -0.9771 | none       |
| SLC6A1   | 0.825 | 0.6041 | 5.1807 | 4.62E-04 | 0.007 | 0.23 | -1.3183 | none       |
| HSD17B2  | 0.449 | 0.3109 | 5.18   | 4.62E-04 | 0.007 | 0.23 | -0.8006 | none       |
| TMEM120  | 0.834 | 0.5851 | 5.1791 | 4.63E-04 | 0.007 | 0.23 | -1.1676 | none       |
| CARS2    | 0.698 | 0.5803 | 5.1788 | 4.63E-04 | 0.007 | 0.23 | -1.3749 | none       |
| STARD10  | 0.874 | 0.6512 | 5.178  | 4.64E-04 | 0.007 | 0.23 | -1.2549 | none       |
| HOPX     | 0.731 | 0.5162 | 5.1772 | 4.64E-04 | 0.007 | 0.23 | -1.2298 | none       |
| RPS6KA3  | 0.788 | 0.6392 | 5.1736 | 4.67E-04 | 0.007 | 0.22 | -1.5114 | none       |
| TMUB2    | 0.66  | 0.4559 | 5.1724 | 4.67E-04 | 0.007 | 0.22 | -1.2427 | none       |
| OR2M4    | 0.531 | 0.3799 | 5.1723 | 4.68E-04 | 0.007 | 0.22 | -1.3593 | none       |
| PIWIL3   | 0.642 | 0.459  | 5.1714 | 4.68E-04 | 0.007 | 0.22 | -1.2994 | none       |
| ARSG     | 0.819 | 0.6235 | 5.1684 | 4.70E-04 | 0.007 | 0.22 | -1.0295 | none       |
| MORN3    | 0.738 | 0.5261 | 5.1658 | 4.72E-04 | 0.007 | 0.21 | -1.5389 | OA-related |
| CD200    | 0.695 | 0.5125 | 5.1638 | 4.73E-04 | 0.007 | 0.21 | -1.4153 | none       |
| CABP4    | 0.979 | 0.7524 | 5.1605 | 4.75E-04 | 0.007 | 0.21 | -1.4452 | none       |
| AKT2     | 0.646 | 0.5513 | 5.1588 | 4.77E-04 | 0.007 | 0.2  | -0.9463 | none       |
| VWCE     | 0.818 | 0.6594 | 5.1584 | 4.77E-04 | 0.007 | 0.2  | -1.6472 | OA-related |
| OLFML2A  | 0.507 | 0.359  | 5.1582 | 4.77E-04 | 0.007 | 0.2  | -1.4756 | none       |
| NUMA1    | 1.116 | 1.0442 | 5.158  | 4.77E-04 | 0.007 | 0.2  | -0.9338 | none       |
| STEAP4   | 0.833 | 0.5963 | 5.1554 | 4.79E-04 | 0.007 | 0.2  | -1.3944 | none       |
| KYNU     | 0.471 | 0.3501 | 5.1533 | 4.80E-04 | 0.007 | 0.2  | -1.5247 | none       |
| GRIK2    | 0.691 | 0.518  | 5.152  | 4.81E-04 | 0.007 | 0.19 | -1.3121 | none       |
| PPP2CB   | 0.962 | 0.778  | 5.1511 | 4.82E-04 | 0.007 | 0.19 | -1.0657 | none       |
| PCDHA9   | 0.531 | 0.3894 | 5.1509 | 4.82E-04 | 0.007 | 0.19 | -1.6026 | OA-related |
| FCHO1    | 0.874 | 0.77   | 5.1508 | 4.82E-04 | 0.007 | 0.19 | -1.1352 | none       |
| HNMT     | 0.994 | 0.746  | 5.1499 | 4.83E-04 | 0.007 | 0.19 | -1.0997 | none       |
| C1ORF158 | 0.518 | 0.3672 | 5.1477 | 4.84E-04 | 0.007 | 0.19 | -1.0977 | none       |
| GLS      | 0.595 | 0.4919 | 5.147  | 4.85E-04 | 0.007 | 0.19 | -1.1171 | none       |
| NMNAT3   | 0.692 | 0.5124 | 5.1444 | 4.86E-04 | 0.007 | 0.18 | -1.2065 | none       |
| DBT      | 0.732 | 0.633  | 5.1443 | 4.86E-04 | 0.007 | 0.18 | -1.4493 | none       |
| SLCO2B1  | 0.733 | 0.6294 | 5.1415 | 4.88E-04 | 0.007 | 0.18 | -0.8908 | none       |
| DUSP18   | 0.66  | 0.5815 | 5.1356 | 4.92E-04 | 0.007 | 0.17 | -1.1913 | none       |
| TMEM45B  | 0.579 | 0.3989 | 5.1351 | 4.93E-04 | 0.007 | 0.17 | -1.2074 | none       |

|          |       |        |        |          |       |      |         |            |
|----------|-------|--------|--------|----------|-------|------|---------|------------|
| PACRG    | 1.221 | 0.9947 | 5.1329 | 4.94E-04 | 0.007 | 0.17 | -0.8942 | none       |
| DAPL1    | 0.698 | 0.5393 | 5.1328 | 4.94E-04 | 0.007 | 0.17 | 0.0721  | none       |
| SCNN1A   | 0.805 | 0.619  | 5.1327 | 4.94E-04 | 0.007 | 0.17 | -1.0906 | none       |
| GPT2     | 0.733 | 0.5721 | 5.132  | 4.95E-04 | 0.007 | 0.17 | -1.4535 | none       |
| ZNF136   | 0.965 | 0.7404 | 5.1299 | 4.96E-04 | 0.007 | 0.16 | -1.2038 | none       |
| KMT2D    | 1.306 | 1.2134 | 5.1298 | 4.96E-04 | 0.007 | 0.16 | -1.3647 | none       |
| ZNF333   | 0.708 | 0.5759 | 5.1239 | 5.01E-04 | 0.007 | 0.15 | -1.5126 | none       |
| DDX51    | 0.868 | 0.7886 | 5.1216 | 5.02E-04 | 0.007 | 0.15 | -1.567  | OA-related |
| TCTN2    | 0.588 | 0.4134 | 5.1184 | 5.05E-04 | 0.007 | 0.15 | -1.5491 | OA-related |
| PLCXD1   | 0.811 | 0.6681 | 5.1174 | 5.05E-04 | 0.007 | 0.15 | -1.2765 | none       |
| OR8A1    | 0.508 | 0.3779 | 5.1171 | 5.06E-04 | 0.007 | 0.14 | -1.3687 | none       |
| BMP8A    | 0.59  | 0.4569 | 5.1168 | 5.06E-04 | 0.007 | 0.14 | -1.4075 | none       |
| DPY19L3  | 0.898 | 0.7618 | 5.1166 | 5.06E-04 | 0.007 | 0.14 | -1.4292 | none       |
| ZNF557   | 0.677 | 0.544  | 5.1161 | 5.06E-04 | 0.007 | 0.14 | -1.6608 | OA-related |
| LRRN4CL  | 0.646 | 0.4848 | 5.1139 | 5.08E-04 | 0.007 | 0.14 | -1.4537 | none       |
| DGKH     | 0.9   | 0.7986 | 5.1136 | 5.08E-04 | 0.007 | 0.14 | -1.6416 | OA-related |
| TRIM73   | 0.824 | 0.6893 | 5.1135 | 5.08E-04 | 0.007 | 0.14 | -1.2763 | none       |
| ABHD12B  | 1.027 | 0.8885 | 5.113  | 5.08E-04 | 0.007 | 0.14 | -0.8366 | none       |
| BCL2L11  | 0.643 | 0.474  | 5.1128 | 5.09E-04 | 0.007 | 0.14 | -0.7219 | none       |
| DSG2     | 0.537 | 0.386  | 5.1111 | 5.10E-04 | 0.007 | 0.14 | -1.5621 | OA-related |
| NALCN    | 0.932 | 0.6882 | 5.11   | 5.11E-04 | 0.007 | 0.13 | -1.3345 | none       |
| MAP4K1   | 0.632 | 0.5229 | 5.1094 | 5.11E-04 | 0.007 | 0.13 | -1.4515 | none       |
| COPB2    | 0.582 | 0.4331 | 5.1092 | 5.11E-04 | 0.007 | 0.13 | -0.9857 | none       |
| C3       | 1.122 | 0.8748 | 5.1079 | 5.12E-04 | 0.007 | 0.13 | -1.2749 | none       |
| EFCAB7   | 0.76  | 0.5659 | 5.1065 | 5.13E-04 | 0.007 | 0.13 | -0.6634 | none       |
| ST3GAL2  | 0.843 | 0.7182 | 5.1064 | 5.13E-04 | 0.007 | 0.13 | -1.3989 | none       |
| AC019206 | 1.011 | 0.7499 | 5.1045 | 5.15E-04 | 0.007 | 0.13 | -0.6609 | none       |
| TBC1D12  | 0.631 | 0.476  | 5.1012 | 5.17E-04 | 0.007 | 0.12 | -0.879  | none       |
| CBX7     | 0.539 | 0.4434 | 5.0984 | 5.19E-04 | 0.007 | 0.12 | -1.4028 | none       |
| MALL     | 0.6   | 0.4562 | 5.0977 | 5.20E-04 | 0.007 | 0.12 | -1.0828 | none       |
| EPS8     | 0.95  | 0.8165 | 5.0974 | 5.20E-04 | 0.007 | 0.12 | -1.1539 | none       |
| APCDD1   | 0.851 | 0.608  | 5.0942 | 5.22E-04 | 0.007 | 0.11 | -1.4981 | none       |
| FGFR4    | 0.717 | 0.577  | 5.0935 | 5.23E-04 | 0.007 | 0.11 | -1.147  | none       |
| ABCB5    | 0.588 | 0.4247 | 5.0928 | 5.23E-04 | 0.007 | 0.11 | -1.3552 | none       |
| OCLN     | 0.466 | 0.3695 | 5.0915 | 5.24E-04 | 0.007 | 0.11 | -1.2839 | none       |
| TPD52L1  | 0.638 | 0.4201 | 5.0908 | 5.25E-04 | 0.007 | 0.11 | -1.4204 | none       |
| CYP2C19  | 0.558 | 0.4146 | 5.0884 | 5.27E-04 | 0.007 | 0.1  | -1.2954 | none       |
| C2ORF50  | 0.479 | 0.3727 | 5.0864 | 5.28E-04 | 0.007 | 0.1  | -1.3408 | none       |
| BTBD19   | 0.829 | 0.6709 | 5.0826 | 5.31E-04 | 0.007 | 0.1  | -1.5352 | OA-related |
| SLC29A4  | 0.681 | 0.5048 | 5.0821 | 5.31E-04 | 0.007 | 0.09 | -1.396  | none       |

|          |       |        |        |          |       |      |         |            |
|----------|-------|--------|--------|----------|-------|------|---------|------------|
| PQLC2    | 0.624 | 0.5092 | 5.0795 | 5.33E-04 | 0.007 | 0.09 | -0.2378 | none       |
| ROBO1    | 0.647 | 0.4933 | 5.079  | 5.34E-04 | 0.007 | 0.09 | -1.2213 | none       |
| RTBDN    | 0.605 | 0.4767 | 5.079  | 5.34E-04 | 0.007 | 0.09 | -0.033  | none       |
| TNRC6A   | 1.034 | 0.995  | 5.0782 | 5.34E-04 | 0.007 | 0.09 | -1.2199 | none       |
| ADGRE2   | 0.623 | 0.4946 | 5.0761 | 5.36E-04 | 0.007 | 0.09 | -1.1862 | none       |
| SLC25A33 | 0.621 | 0.4529 | 5.073  | 5.38E-04 | 0.007 | 0.08 | -1.1774 | none       |
| GGCX     | 0.986 | 0.7003 | 5.0697 | 5.41E-04 | 0.007 | 0.08 | -1.3514 | none       |
| MAB21L3  | 0.511 | 0.428  | 5.0683 | 5.42E-04 | 0.007 | 0.08 | -1.2016 | none       |
| PCYOX1   | 0.71  | 0.5814 | 5.0681 | 5.42E-04 | 0.007 | 0.07 | -1.3086 | none       |
| SYCP3    | 0.684 | 0.4929 | 5.0651 | 5.44E-04 | 0.007 | 0.07 | -1.4869 | none       |
| NOCT     | 0.945 | 0.8316 | 5.0641 | 5.45E-04 | 0.007 | 0.07 | -1.5446 | OA-related |
| ZNF814   | 0.798 | 0.6165 | 5.0613 | 5.47E-04 | 0.007 | 0.07 | -1.1017 | none       |
| ORC4     | 0.62  | 0.4185 | 5.0575 | 5.50E-04 | 0.007 | 0.06 | -1.2391 | none       |
| GDPGP1   | 0.998 | 0.7704 | 5.0568 | 5.51E-04 | 0.007 | 0.06 | -1.5492 | OA-related |
| KCNE3    | 0.603 | 0.4808 | 5.0548 | 5.52E-04 | 0.007 | 0.06 | -1.2704 | none       |
| MORC4    | 0.885 | 0.8046 | 5.0516 | 5.55E-04 | 0.007 | 0.05 | -1.3962 | none       |
| ANKRD54  | 0.613 | 0.5074 | 5.0514 | 5.55E-04 | 0.007 | 0.05 | -1.2905 | none       |
| PIGR     | 0.847 | 0.6893 | 5.051  | 5.55E-04 | 0.007 | 0.05 | -0.9774 | none       |
| RBFOX1   | 0.696 | 0.5424 | 5.0484 | 5.58E-04 | 0.007 | 0.05 | -1.4512 | none       |
| DHR SX   | 0.681 | 0.4413 | 5.0471 | 5.59E-04 | 0.008 | 0.04 | -0.8953 | none       |
| INTU     | 0.521 | 0.4149 | 5.0465 | 5.59E-04 | 0.008 | 0.04 | -1.3896 | none       |
| HAP1     | 0.586 | 0.4196 | 5.0442 | 5.61E-04 | 0.008 | 0.04 | -1.6227 | OA-related |
| WIP1     | 0.714 | 0.5173 | 5.0438 | 5.61E-04 | 0.008 | 0.04 | -1.3671 | none       |
| HERC4    | 0.713 | 0.5467 | 5.0431 | 5.62E-04 | 0.008 | 0.04 | -1.342  | none       |
| FER      | 0.684 | 0.5946 | 5.0418 | 5.63E-04 | 0.008 | 0.04 | -1.204  | none       |
| EXPH5    | 0.547 | 0.385  | 5.0406 | 5.64E-04 | 0.008 | 0.04 | -1.4937 | none       |
| PLL P    | 0.673 | 0.5447 | 5.0402 | 5.64E-04 | 0.008 | 0.04 | -1.3821 | none       |
| COX18    | 0.776 | 0.6292 | 5.0388 | 5.65E-04 | 0.008 | 0.03 | -1.0049 | none       |
| TNNT1    | 0.957 | 0.7653 | 5.0384 | 5.66E-04 | 0.008 | 0.03 | -0.97   | none       |
| ZNF83    | 0.979 | 0.8118 | 5.0373 | 5.66E-04 | 0.008 | 0.03 | -1.4116 | none       |
| ENPP1    | 0.639 | 0.4569 | 5.0369 | 5.67E-04 | 0.008 | 0.03 | -1.3211 | none       |
| NOS1     | 0.611 | 0.4846 | 5.0362 | 5.67E-04 | 0.008 | 0.03 | -1.3287 | none       |
| ZNF660   | 0.438 | 0.3299 | 5.035  | 5.68E-04 | 0.008 | 0.03 | -1.4298 | none       |
| CDC42BPC | 0.643 | 0.5109 | 5.0338 | 5.69E-04 | 0.008 | 0.03 | -1.0507 | none       |
| ACOT2    | 0.564 | 0.3345 | 5.0312 | 5.71E-04 | 0.008 | 0.02 | -1.1194 | none       |
| IFT88    | 0.773 | 0.6308 | 5.0296 | 5.73E-04 | 0.008 | 0.02 | -0.9284 | none       |
| OR10K1   | 0.454 | 0.3426 | 5.0272 | 5.75E-04 | 0.008 | 0.02 | -0.8692 | none       |
| C1RL     | 0.952 | 0.8286 | 5.0265 | 5.75E-04 | 0.008 | 0.02 | -1.4152 | none       |
| IGSF6    | 0.84  | 0.7137 | 5.0254 | 5.76E-04 | 0.008 | 0.01 | -1.3824 | none       |
| SPTB     | 0.682 | 0.5661 | 5.0252 | 5.76E-04 | 0.008 | 0.01 | -1.1968 | none       |

|          |       |        |        |          |       |       |         |            |
|----------|-------|--------|--------|----------|-------|-------|---------|------------|
| ZNF789   | 0.749 | 0.5703 | 5.0247 | 5.77E-04 | 0.008 | 0.01  | -1.3147 | none       |
| YBX3     | 1.006 | 0.8909 | 5.0241 | 5.77E-04 | 0.008 | 0.01  | -1.3964 | none       |
| CCBE1    | 0.569 | 0.381  | 5.0206 | 5.80E-04 | 0.008 | 0.01  | -1.0427 | none       |
| SBSPON   | 0.571 | 0.443  | 5.0197 | 5.81E-04 | 0.008 | 0.01  | -1.2461 | none       |
| DCAF17   | 0.903 | 0.6685 | 5.0188 | 5.82E-04 | 0.008 | 0     | -1.137  | none       |
| CFAP221  | 0.599 | 0.4931 | 5.0179 | 5.82E-04 | 0.008 | 0     | -0.9849 | none       |
| SLC3A1   | 0.83  | 0.6176 | 5.0178 | 5.82E-04 | 0.008 | 0     | -1.4872 | none       |
| FILIP1L  | 0.95  | 0.8309 | 5.0176 | 5.83E-04 | 0.008 | 0     | -0.9919 | none       |
| TRIM5    | 0.87  | 0.6567 | 5.0175 | 5.83E-04 | 0.008 | 0     | -0.8844 | none       |
| NEIL1    | 0.771 | 0.6056 | 5.0174 | 5.83E-04 | 0.008 | 0     | -1.5045 | none       |
| KCNK3    | 0.542 | 0.4093 | 5.0167 | 5.83E-04 | 0.008 | 0     | -1.449  | none       |
| COL1A2   | 0.526 | 0.3804 | 5.0158 | 5.84E-04 | 0.008 | ##### | -0.9916 | none       |
| SLC2A14  | 0.82  | 0.6325 | 5.0153 | 5.85E-04 | 0.008 | ##### | -1.2063 | none       |
| GLB1L    | 0.838 | 0.6407 | 5.0145 | 5.85E-04 | 0.008 | -0    | -0.7651 | none       |
| NPFFR1   | 0.527 | 0.3873 | 5.0136 | 5.86E-04 | 0.008 | -0    | -1.5775 | OA-related |
| GCNT3    | 0.583 | 0.4224 | 5.0125 | 5.87E-04 | 0.008 | -0    | -1.3362 | none       |
| GABPB2   | 0.724 | 0.5932 | 5.0119 | 5.87E-04 | 0.008 | -0.01 | -1.4883 | none       |
| PIGBOS1  | 0.743 | 0.5573 | 5.0113 | 5.88E-04 | 0.008 | -0.01 | -1.0587 | none       |
| P3H1     | 0.827 | 0.674  | 5.0109 | 5.88E-04 | 0.008 | -0.01 | -1.1939 | none       |
| FAM180A  | 0.762 | 0.5459 | 5.0107 | 5.88E-04 | 0.008 | -0.01 | -1.2635 | none       |
| WDR26    | 0.754 | 0.6275 | 5.0075 | 5.91E-04 | 0.008 | -0.01 | -1.4547 | none       |
| SATL1    | 0.558 | 0.4266 | 5.0073 | 5.91E-04 | 0.008 | -0.01 | -1.1955 | none       |
| KIAA1328 | 0.692 | 0.5537 | 5.0071 | 5.92E-04 | 0.008 | -0.01 | -1.2425 | none       |
| SNX29    | 1.167 | 0.9433 | 5.0068 | 5.92E-04 | 0.008 | -0.01 | -1.356  | none       |
| CADPS    | 0.557 | 0.4132 | 5.0067 | 5.92E-04 | 0.008 | -0.01 | -1.3387 | none       |
| POU2F3   | 0.552 | 0.4382 | 5.0041 | 5.94E-04 | 0.008 | -0.02 | -1.4092 | none       |
| ZNF595   | 0.862 | 0.6895 | 5.0036 | 5.95E-04 | 0.008 | -0.02 | -1.3051 | none       |
| THEM4    | 0.657 | 0.5044 | 5.0026 | 5.95E-04 | 0.008 | -0.02 | -0.9282 | none       |
| APOBEC3F | 0.531 | 0.4305 | 5.0002 | 5.97E-04 | 0.008 | -0.02 | -1.5061 | none       |
| CEP76    | 0.659 | 0.4837 | 4.9979 | 5.99E-04 | 0.008 | -0.03 | -1.0492 | none       |
| TMEM135  | 1.054 | 0.8241 | 4.9966 | 6.00E-04 | 0.008 | -0.03 | -0.9149 | none       |
| DMD      | 0.871 | 0.7154 | 4.9941 | 6.03E-04 | 0.008 | -0.03 | -1.3151 | none       |
| FRMD4B   | 1.174 | 1.0303 | 4.9918 | 6.05E-04 | 0.008 | -0.03 | -1.4167 | none       |
| AHDC1    | 1.021 | 0.9495 | 4.9873 | 6.09E-04 | 0.008 | -0.04 | -1.3551 | none       |
| TIE1     | 0.631 | 0.4799 | 4.9872 | 6.09E-04 | 0.008 | -0.04 | -1.1708 | none       |
| ABCC3    | 0.968 | 0.7302 | 4.9857 | 6.10E-04 | 0.008 | -0.04 | -1.5267 | none       |
| C1S      | 0.6   | 0.4889 | 4.9843 | 6.11E-04 | 0.008 | -0.05 | -1.4408 | none       |
| ANKS3    | 0.741 | 0.6111 | 4.9839 | 6.12E-04 | 0.008 | -0.05 | -1.4941 | none       |
| FAM9B    | 0.498 | 0.3404 | 4.9835 | 6.12E-04 | 0.008 | -0.05 | -1.3659 | none       |
| ZNF641   | 0.634 | 0.5196 | 4.9823 | 6.13E-04 | 0.008 | -0.05 | -0.5973 | none       |

|          |       |        |        |          |       |       |         |            |
|----------|-------|--------|--------|----------|-------|-------|---------|------------|
| ANKLE1   | 0.536 | 0.434  | 4.9789 | 6.16E-04 | 0.008 | -0.05 | -0.7624 | none       |
| AFAP1L1  | 0.552 | 0.4091 | 4.978  | 6.17E-04 | 0.008 | -0.05 | -1.5576 | OA-related |
| RHD      | 0.766 | 0.6192 | 4.9776 | 6.17E-04 | 0.008 | -0.05 | -1.5337 | OA-related |
| LILRA2   | 0.68  | 0.5161 | 4.9776 | 6.17E-04 | 0.008 | -0.05 | -1.5988 | OA-related |
| SIAE     | 0.575 | 0.4744 | 4.9769 | 6.18E-04 | 0.008 | -0.06 | -0.9552 | none       |
| SMIM5    | 0.469 | 0.3582 | 4.9759 | 6.19E-04 | 0.008 | -0.06 | -1.3243 | none       |
| ZNF662   | 0.561 | 0.3814 | 4.9759 | 6.19E-04 | 0.008 | -0.06 | -1.4049 | none       |
| VRK3     | 0.508 | 0.3672 | 4.9757 | 6.19E-04 | 0.008 | -0.06 | -1.3962 | none       |
| LIMK1    | 0.888 | 0.736  | 4.9737 | 6.21E-04 | 0.008 | -0.06 | -1.4345 | none       |
| PATJ     | 0.929 | 0.7895 | 4.9716 | 6.23E-04 | 0.008 | -0.06 | -1.4928 | none       |
| MTPAP    | 0.596 | 0.4975 | 4.9715 | 6.23E-04 | 0.008 | -0.06 | -1.2004 | none       |
| SLC35F5  | 0.745 | 0.5029 | 4.9715 | 6.23E-04 | 0.008 | -0.06 | -1.2127 | none       |
| STARD9   | 0.786 | 0.6162 | 4.9713 | 6.23E-04 | 0.008 | -0.06 | -1.2763 | none       |
| KAT8     | 0.767 | 0.6173 | 4.9703 | 6.24E-04 | 0.008 | -0.07 | -1.4386 | none       |
| SLC25A23 | 1.224 | 0.9857 | 4.9689 | 6.25E-04 | 0.008 | -0.07 | -1.0253 | none       |
| C15ORF40 | 0.831 | 0.6184 | 4.9667 | 6.27E-04 | 0.008 | -0.07 | -1.1492 | none       |
| ZNF7     | 0.784 | 0.6764 | 4.9667 | 6.27E-04 | 0.008 | -0.07 | -1.2297 | none       |
| VPS50    | 0.776 | 0.6428 | 4.9657 | 6.28E-04 | 0.008 | -0.07 | -1.0612 | none       |
| SLC30A8  | 1.15  | 0.953  | 4.9652 | 6.28E-04 | 0.008 | -0.07 | -0.5096 | none       |
| CEP19    | 0.7   | 0.5393 | 4.9626 | 6.31E-04 | 0.008 | -0.08 | -1.3126 | none       |
| AKAP10   | 0.794 | 0.6538 | 4.9614 | 6.32E-04 | 0.008 | -0.08 | -1.4537 | none       |
| CFLAR    | 0.52  | 0.3436 | 4.9612 | 6.32E-04 | 0.008 | -0.08 | -1.2252 | none       |
| PIIP5K2  | 0.877 | 0.7064 | 4.9599 | 6.33E-04 | 0.008 | -0.08 | -1.0995 | none       |
| MTFR1    | 0.998 | 0.8387 | 4.9591 | 6.34E-04 | 0.008 | -0.08 | -0.7788 | none       |
| PRR23C   | 0.546 | 0.3923 | 4.9581 | 6.35E-04 | 0.008 | -0.08 | -1.3362 | none       |
| HTRA4    | 0.58  | 0.4105 | 4.9536 | 6.39E-04 | 0.008 | -0.09 | -1.0777 | none       |
| SLC25A45 | 0.897 | 0.7218 | 4.9528 | 6.40E-04 | 0.008 | -0.09 | -1.4091 | none       |
| ZC3HAV1L | 0.47  | 0.3604 | 4.9517 | 6.41E-04 | 0.008 | -0.09 | -0.7814 | none       |
| PCDHB11  | 0.675 | 0.4994 | 4.9506 | 6.42E-04 | 0.008 | -0.09 | -1.4688 | none       |
| NT5C3B   | 0.59  | 0.4369 | 4.9496 | 6.43E-04 | 0.008 | -0.1  | -0.9833 | none       |
| DSEL     | 0.429 | 0.3163 | 4.9492 | 6.43E-04 | 0.008 | -0.1  | -1.5623 | OA-related |
| BARX2    | 0.543 | 0.395  | 4.9474 | 6.45E-04 | 0.008 | -0.1  | -1.4938 | none       |
| ZSCAN18  | 1.173 | 0.9925 | 4.9463 | 6.46E-04 | 0.008 | -0.1  | -0.6317 | none       |
| CLCC1    | 0.572 | 0.4808 | 4.9459 | 6.46E-04 | 0.008 | -0.1  | -1.4477 | none       |
| RALGPS2  | 0.659 | 0.4552 | 4.9453 | 6.47E-04 | 0.008 | -0.1  | -1.1826 | none       |
| TEPP     | 0.916 | 0.6653 | 4.9447 | 6.47E-04 | 0.008 | -0.1  | -1.3826 | none       |
| UBXN2A   | 0.763 | 0.6417 | 4.9436 | 6.48E-04 | 0.008 | -0.1  | -1.5344 | OA-related |
| DIP2A    | 0.687 | 0.6044 | 4.943  | 6.49E-04 | 0.008 | -0.1  | -1.3801 | none       |
| EREG     | 0.738 | 0.5929 | 4.9424 | 6.49E-04 | 0.008 | -0.11 | -1.3824 | none       |
| KLHL24   | 0.645 | 0.4572 | 4.9402 | 6.51E-04 | 0.008 | -0.11 | -1.0931 | none       |

|          |       |        |        |          |       |       |         |            |
|----------|-------|--------|--------|----------|-------|-------|---------|------------|
| CARF     | 0.608 | 0.4882 | 4.9401 | 6.51E-04 | 0.008 | -0.11 | -1.4878 | none       |
| SEC23B   | 0.514 | 0.3527 | 4.9385 | 6.53E-04 | 0.008 | -0.11 | -0.6292 | none       |
| CCDC122  | 0.513 | 0.3674 | 4.9378 | 6.54E-04 | 0.008 | -0.11 | -1.4921 | none       |
| CYP27C1  | 0.49  | 0.3496 | 4.9362 | 6.55E-04 | 0.008 | -0.11 | -1.4319 | none       |
| CENPV    | 0.735 | 0.5226 | 4.9356 | 6.56E-04 | 0.008 | -0.12 | -1.3434 | none       |
| ASB18    | 0.724 | 0.5777 | 4.9323 | 6.59E-04 | 0.008 | -0.12 | -1.3016 | none       |
| ZNF559   | 0.791 | 0.5997 | 4.9316 | 6.60E-04 | 0.008 | -0.12 | -1.1503 | none       |
| SETDB1   | 0.772 | 0.6349 | 4.9295 | 6.62E-04 | 0.008 | -0.12 | -1.5883 | OA-related |
| TFR2     | 0.693 | 0.5416 | 4.9283 | 6.63E-04 | 0.008 | -0.13 | -0.9515 | none       |
| SAMD5    | 0.479 | 0.3734 | 4.928  | 6.63E-04 | 0.008 | -0.13 | -1.43   | none       |
| SLC22A25 | 0.477 | 0.3564 | 4.9278 | 6.63E-04 | 0.008 | -0.13 | -1.4663 | none       |
| PTGIS    | 0.657 | 0.5223 | 4.925  | 6.66E-04 | 0.008 | -0.13 | -1.5523 | OA-related |
| CROCC    | 0.846 | 0.8223 | 4.9244 | 6.66E-04 | 0.008 | -0.13 | -0.3654 | none       |
| STK33    | 0.813 | 0.7014 | 4.9232 | 6.68E-04 | 0.008 | -0.13 | -1.1551 | none       |
| VWA7     | 0.497 | 0.3612 | 4.9215 | 6.69E-04 | 0.008 | -0.14 | -1.4601 | none       |
| COL9A1   | 0.684 | 0.4918 | 4.9209 | 6.70E-04 | 0.008 | -0.14 | -0.9888 | none       |
| CLVS1    | 0.65  | 0.4555 | 4.9208 | 6.70E-04 | 0.008 | -0.14 | -1.0611 | none       |
| AKAP5    | 0.709 | 0.5863 | 4.9194 | 6.71E-04 | 0.008 | -0.14 | -1.5368 | OA-related |
| MEF2A    | 1.149 | 1.0034 | 4.9191 | 6.72E-04 | 0.008 | -0.14 | -1.0392 | none       |
| TBCE     | 0.644 | 0.4736 | 4.9189 | 6.72E-04 | 0.008 | -0.14 | -0.9708 | none       |
| SERPINB6 | 0.596 | 0.4278 | 4.9189 | 6.72E-04 | 0.008 | -0.14 | -1.3607 | none       |
| P2RX4    | 0.788 | 0.5924 | 4.9184 | 6.72E-04 | 0.008 | -0.14 | -1.3794 | none       |
| H6PD     | 0.717 | 0.6626 | 4.9159 | 6.75E-04 | 0.008 | -0.14 | -1.4761 | none       |
| GAREM1   | 1.007 | 0.7839 | 4.9158 | 6.75E-04 | 0.008 | -0.14 | -1.0115 | none       |
| YTHDF3   | 0.862 | 0.6922 | 4.9153 | 6.75E-04 | 0.008 | -0.14 | -1.1527 | none       |
| OR2AT4   | 0.412 | 0.3147 | 4.9152 | 6.75E-04 | 0.008 | -0.14 | -1.2082 | none       |
| MRPL48   | 0.592 | 0.4092 | 4.914  | 6.76E-04 | 0.008 | -0.15 | -1.3777 | none       |
| L2HGDH   | 0.515 | 0.4056 | 4.9132 | 6.77E-04 | 0.008 | -0.15 | -0.9943 | none       |
| KCNG4    | 0.496 | 0.3881 | 4.9125 | 6.78E-04 | 0.008 | -0.15 | -1.6206 | OA-related |
| SSBP2    | 0.609 | 0.4679 | 4.9124 | 6.78E-04 | 0.008 | -0.15 | -1.142  | none       |
| ZNF135   | 0.644 | 0.4858 | 4.9116 | 6.79E-04 | 0.008 | -0.15 | -1.5008 | none       |
| WHAMM    | 0.872 | 0.7406 | 4.9113 | 6.79E-04 | 0.008 | -0.15 | -1.6278 | OA-related |
| CDAN1    | 0.767 | 0.662  | 4.9108 | 6.80E-04 | 0.008 | -0.15 | -1.2591 | none       |
| SS18     | 0.71  | 0.5302 | 4.9107 | 6.80E-04 | 0.008 | -0.15 | -1.2243 | none       |
| ZFP14    | 0.575 | 0.4583 | 4.9101 | 6.80E-04 | 0.008 | -0.15 | -1.5732 | OA-related |
| AGMAT    | 0.582 | 0.4517 | 4.9096 | 6.81E-04 | 0.008 | -0.15 | -0.935  | none       |
| SPICE1   | 0.836 | 0.78   | 4.908  | 6.82E-04 | 0.008 | -0.16 | -0.5515 | none       |
| OR10G4   | 0.538 | 0.3955 | 4.9077 | 6.83E-04 | 0.008 | -0.16 | -0.8245 | none       |
| DNASE1L3 | 0.619 | 0.4779 | 4.9072 | 6.83E-04 | 0.008 | -0.16 | -1.3504 | none       |
| CLK4     | 0.549 | 0.4245 | 4.907  | 6.83E-04 | 0.008 | -0.16 | -1.299  | none       |

|          |       |        |        |          |       |       |         |            |
|----------|-------|--------|--------|----------|-------|-------|---------|------------|
| FGD5     | 0.714 | 0.5097 | 4.904  | 6.86E-04 | 0.008 | -0.16 | -1.525  | none       |
| THAP5    | 0.862 | 0.6952 | 4.9017 | 6.89E-04 | 0.008 | -0.16 | -1.3721 | none       |
| PALM     | 0.598 | 0.4189 | 4.9001 | 6.90E-04 | 0.008 | -0.17 | -1.4669 | none       |
| FAM177A: | 0.76  | 0.5483 | 4.8991 | 6.91E-04 | 0.008 | -0.17 | -1.3414 | none       |
| SDE2     | 0.527 | 0.3527 | 4.8971 | 6.93E-04 | 0.008 | -0.17 | -1.321  | none       |
| PLEKHB2  | 0.925 | 0.675  | 4.8962 | 6.94E-04 | 0.008 | -0.17 | -1.2512 | none       |
| PTGR1    | 0.545 | 0.4328 | 4.8956 | 6.95E-04 | 0.008 | -0.17 | -1.3512 | none       |
| CDC73    | 0.564 | 0.4101 | 4.8943 | 6.96E-04 | 0.008 | -0.18 | -1.1867 | none       |
| NAIF1    | 0.643 | 0.4983 | 4.8927 | 6.98E-04 | 0.008 | -0.18 | -1.4102 | none       |
| PM20D2   | 0.595 | 0.453  | 4.8919 | 6.99E-04 | 0.008 | -0.18 | -0.8174 | none       |
| TNS4     | 0.72  | 0.573  | 4.8916 | 6.99E-04 | 0.008 | -0.18 | -1.4631 | none       |
| SPATA6L  | 0.752 | 0.5531 | 4.8908 | 7.00E-04 | 0.008 | -0.18 | -1.2044 | none       |
| ADAMTS1  | 0.493 | 0.3518 | 4.89   | 7.01E-04 | 0.008 | -0.18 | -1.5894 | OA-related |
| APOE     | 1.159 | 0.8947 | 4.8889 | 7.02E-04 | 0.008 | -0.18 | -1.344  | none       |
| CYBRD1   | 0.97  | 0.714  | 4.8886 | 7.02E-04 | 0.008 | -0.18 | -0.8604 | none       |
| SPC24    | 0.619 | 0.4689 | 4.8873 | 7.03E-04 | 0.008 | -0.19 | -1.5259 | none       |
| GLMP     | 1.252 | 0.9145 | 4.8863 | 7.04E-04 | 0.008 | -0.19 | -1.1556 | none       |
| MSANTD1  | 0.656 | 0.4939 | 4.8835 | 7.07E-04 | 0.008 | -0.19 | -1.0389 | none       |
| ZNF354B  | 0.673 | 0.5217 | 4.8822 | 7.09E-04 | 0.008 | -0.19 | -0.5263 | none       |
| PLPP5    | 0.729 | 0.5193 | 4.8815 | 7.09E-04 | 0.008 | -0.19 | -0.7186 | none       |
| RSRP1    | 0.648 | 0.514  | 4.8795 | 7.11E-04 | 0.008 | -0.2  | -1.1619 | none       |
| CCDC9    | 1.031 | 0.8635 | 4.8787 | 7.12E-04 | 0.008 | -0.2  | -1.4591 | none       |
| SYTL1    | 0.584 | 0.4314 | 4.8769 | 7.14E-04 | 0.008 | -0.2  | -1.4733 | none       |
| SDSL     | 0.777 | 0.5818 | 4.8767 | 7.14E-04 | 0.008 | -0.2  | -1.5489 | OA-related |
| SPRED3   | 0.603 | 0.5031 | 4.8766 | 7.14E-04 | 0.008 | -0.2  | -1.4041 | none       |
| PRRG4    | 0.692 | 0.5434 | 4.8757 | 7.15E-04 | 0.008 | -0.2  | -1.6108 | OA-related |
| TNNT2    | 0.823 | 0.6743 | 4.8741 | 7.17E-04 | 0.009 | -0.2  | -1.3636 | none       |
| FCRL2    | 0.921 | 0.7079 | 4.873  | 7.18E-04 | 0.009 | -0.21 | -1.5131 | none       |
| TAF1L    | 0.416 | 0.2978 | 4.8729 | 7.18E-04 | 0.009 | -0.21 | -1.4587 | none       |
| PTPRS    | 0.684 | 0.5094 | 4.8725 | 7.19E-04 | 0.009 | -0.21 | -1.1077 | none       |
| DLG4     | 0.786 | 0.6353 | 4.8703 | 7.21E-04 | 0.009 | -0.21 | -1.3951 | none       |
| SYNJ2    | 0.771 | 0.6097 | 4.8699 | 7.21E-04 | 0.009 | -0.21 | -1.4004 | none       |
| ASH1L    | 0.937 | 0.8203 | 4.869  | 7.22E-04 | 0.009 | -0.21 | -1.0695 | none       |
| ASGR1    | 1.049 | 0.8077 | 4.868  | 7.23E-04 | 0.009 | -0.21 | -1.1304 | none       |
| SLC30A4  | 0.591 | 0.4777 | 4.8659 | 7.26E-04 | 0.009 | -0.22 | -1.3835 | none       |
| CRLF2    | 0.621 | 0.4223 | 4.8622 | 7.29E-04 | 0.009 | -0.22 | -1.4724 | none       |
| GABRG2   | 0.694 | 0.5483 | 4.8621 | 0.00073  | 0.009 | -0.22 | -1.4194 | none       |
| ZNF716   | 0.634 | 0.4575 | 4.8597 | 7.32E-04 | 0.009 | -0.23 | -1.5761 | OA-related |
| ZKSCAN3  | 0.629 | 0.4794 | 4.8588 | 7.33E-04 | 0.009 | -0.23 | -1.4254 | none       |
| TUSC3    | 0.73  | 0.5227 | 4.8584 | 7.33E-04 | 0.009 | -0.23 | -0.897  | none       |

|          |       |        |        |          |       |       |         |            |
|----------|-------|--------|--------|----------|-------|-------|---------|------------|
| ACAD8    | 0.471 | 0.3887 | 4.8579 | 7.34E-04 | 0.009 | -0.23 | -1.4429 | none       |
| ANKRD18A | 1.047 | 0.8105 | 4.8568 | 7.35E-04 | 0.009 | -0.23 | -0.4682 | none       |
| LARP6    | 0.525 | 0.4197 | 4.8567 | 7.35E-04 | 0.009 | -0.23 | -1.3321 | none       |
| SCD5     | 0.628 | 0.4486 | 4.8554 | 7.37E-04 | 0.009 | -0.23 | -1.4493 | none       |
| NELFA    | 0.807 | 0.6951 | 4.8553 | 7.37E-04 | 0.009 | -0.23 | -1.5404 | OA-related |
| PPP1R37  | 0.839 | 0.7003 | 4.8552 | 7.37E-04 | 0.009 | -0.23 | -1.4087 | none       |
| WTIP     | 0.466 | 0.3473 | 4.8538 | 7.38E-04 | 0.009 | -0.23 | -1.4378 | none       |
| MYH3     | 1.186 | 0.9656 | 4.8531 | 7.39E-04 | 0.009 | -0.24 | -1.0452 | none       |
| CA6      | 0.803 | 0.5922 | 4.8522 | 7.40E-04 | 0.009 | -0.24 | -1.2631 | none       |
| PCDHGA5  | 0.431 | 0.3306 | 4.8499 | 7.43E-04 | 0.009 | -0.24 | -1.4156 | none       |
| ZNF215   | 0.929 | 0.719  | 4.8495 | 7.43E-04 | 0.009 | -0.24 | -1.2323 | none       |
| GAN      | 0.628 | 0.5442 | 4.8484 | 7.44E-04 | 0.009 | -0.24 | -1.1909 | none       |
| ZKSCAN7  | 0.655 | 0.4654 | 4.8472 | 7.46E-04 | 0.009 | -0.24 | -1.4178 | none       |
| PHF11    | 0.614 | 0.4539 | 4.8455 | 7.47E-04 | 0.009 | -0.25 | -1.3351 | none       |
| STKLD1   | 0.752 | 0.5673 | 4.8446 | 7.48E-04 | 0.009 | -0.25 | -1.1999 | none       |
| DENND2C  | 0.735 | 0.5675 | 4.8436 | 7.50E-04 | 0.009 | -0.25 | -1.3174 | none       |
| ITGA3    | 0.765 | 0.6482 | 4.8429 | 7.50E-04 | 0.009 | -0.25 | -1.3045 | none       |
| CIART    | 0.746 | 0.5544 | 4.8428 | 7.50E-04 | 0.009 | -0.25 | -1.3565 | none       |
| RSPH3    | 0.628 | 0.499  | 4.8416 | 7.52E-04 | 0.009 | -0.25 | -1.128  | none       |
| FAM153A  | 1.2   | 0.8865 | 4.8411 | 7.52E-04 | 0.009 | -0.25 | -0.8169 | none       |
| CHST5    | 0.604 | 0.4499 | 4.8408 | 7.53E-04 | 0.009 | -0.25 | -1.5572 | OA-related |
| DOCK5    | 0.902 | 0.7414 | 4.8406 | 7.53E-04 | 0.009 | -0.25 | -1.1801 | none       |
| SLC16A4  | 0.624 | 0.4885 | 4.8401 | 7.53E-04 | 0.009 | -0.25 | -1.4332 | none       |
| PLA2G2D  | 0.712 | 0.5031 | 4.84   | 7.53E-04 | 0.009 | -0.25 | -1.5005 | none       |
| AJUBA    | 0.718 | 0.4909 | 4.8372 | 7.57E-04 | 0.009 | -0.26 | -1.3345 | none       |
| MX1      | 0.969 | 0.7818 | 4.8337 | 7.60E-04 | 0.009 | -0.26 | -1.4891 | none       |
| IREB2    | 0.714 | 0.5723 | 4.8306 | 7.64E-04 | 0.009 | -0.27 | -0.7266 | none       |
| B3GALT1  | 0.733 | 0.5472 | 4.8284 | 7.66E-04 | 0.009 | -0.27 | -1.5793 | OA-related |
| LGR6     | 0.58  | 0.4078 | 4.8278 | 7.67E-04 | 0.009 | -0.27 | -1.3833 | none       |
| CCDC120  | 0.506 | 0.4035 | 4.8266 | 7.68E-04 | 0.009 | -0.27 | -1.3879 | none       |
| RAD9A    | 0.842 | 0.6332 | 4.8242 | 7.71E-04 | 0.009 | -0.28 | -1.5817 | OA-related |
| ZNF225   | 0.863 | 0.7504 | 4.8239 | 7.71E-04 | 0.009 | -0.28 | -1.3403 | none       |
| MACF1    | 1.209 | 1.1145 | 4.8233 | 7.72E-04 | 0.009 | -0.28 | -1.0679 | none       |
| NEURL1   | 0.833 | 0.629  | 4.8229 | 7.72E-04 | 0.009 | -0.28 | -0.7871 | none       |
| MSI2     | 0.614 | 0.4457 | 4.8228 | 7.73E-04 | 0.009 | -0.28 | -1.438  | none       |
| DNAH17   | 0.768 | 0.765  | 4.8216 | 7.74E-04 | 0.009 | -0.28 | -1.0153 | none       |
| HAUS3    | 0.608 | 0.5203 | 4.82   | 7.76E-04 | 0.009 | -0.28 | -0.707  | none       |
| ADIPOQ   | 0.606 | 0.4143 | 4.8163 | 7.80E-04 | 0.009 | -0.29 | -1.4078 | none       |
| ATP1A3   | 0.752 | 0.5347 | 4.8151 | 7.81E-04 | 0.009 | -0.29 | -0.8054 | none       |
| HINT3    | 0.469 | 0.3447 | 4.8136 | 7.83E-04 | 0.009 | -0.29 | -0.5419 | none       |



|           |       |        |        |          |       |       |         |            |
|-----------|-------|--------|--------|----------|-------|-------|---------|------------|
| GLOD4     | 0.596 | 0.385  | 4.8132 | 7.84E-04 | 0.009 | -0.29 | -1.2894 | none       |
| BTBD1     | 0.64  | 0.5045 | 4.8128 | 7.84E-04 | 0.009 | -0.29 | -0.9918 | none       |
| LEP       | 0.456 | 0.3354 | 4.8123 | 7.85E-04 | 0.009 | -0.29 | -1.1234 | none       |
| EDC3      | 0.395 | 0.2554 | 4.811  | 7.86E-04 | 0.009 | -0.3  | -0.3759 | none       |
| CCDC125   | 0.671 | 0.591  | 4.8099 | 7.87E-04 | 0.009 | -0.3  | -0.9056 | none       |
| DCST1     | 0.632 | 0.4385 | 4.8071 | 7.91E-04 | 0.009 | -0.3  | -0.7565 | none       |
| VGLL3     | 0.808 | 0.593  | 4.8057 | 7.92E-04 | 0.009 | -0.3  | -1.3886 | none       |
| ZNF69     | 1.126 | 0.8784 | 4.8041 | 7.94E-04 | 0.009 | -0.31 | -1.3493 | none       |
| TARS2     | 0.749 | 0.6419 | 4.803  | 7.95E-04 | 0.009 | -0.31 | -1.4101 | none       |
| SULT1B1   | 0.637 | 0.4682 | 4.8026 | 7.96E-04 | 0.009 | -0.31 | -1.256  | none       |
| ISG20L2   | 0.542 | 0.4453 | 4.8019 | 7.97E-04 | 0.009 | -0.31 | -1.4072 | none       |
| BPIFB1    | 0.671 | 0.5152 | 4.8014 | 7.97E-04 | 0.009 | -0.31 | -1.2795 | none       |
| LPIN3     | 0.792 | 0.6423 | 4.8013 | 7.97E-04 | 0.009 | -0.31 | -1.5548 | OA-related |
| ADAM29    | 0.415 | 0.2587 | 4.7996 | 7.99E-04 | 0.009 | -0.31 | -1.2986 | none       |
| GTPBP3    | 0.546 | 0.4713 | 4.7994 | 8.00E-04 | 0.009 | -0.31 | -1.0173 | none       |
| SLC9A4    | 0.506 | 0.3492 | 4.7985 | 8.01E-04 | 0.009 | -0.32 | -1.6144 | OA-related |
| TNFRSF11I | 0.55  | 0.3971 | 4.7985 | 8.01E-04 | 0.009 | -0.32 | -0.5132 | none       |
| CHRNA7    | 0.67  | 0.4723 | 4.798  | 8.01E-04 | 0.009 | -0.32 | -1.2524 | none       |
| LMOD3     | 0.521 | 0.3738 | 4.7966 | 8.03E-04 | 0.009 | -0.32 | -1.478  | none       |
| ZNF883    | 0.895 | 0.7125 | 4.7934 | 8.07E-04 | 0.009 | -0.32 | -1.2672 | none       |
| ZNF274    | 0.826 | 0.7155 | 4.7917 | 8.09E-04 | 0.009 | -0.33 | -0.5911 | none       |
| TRIM16    | 0.707 | 0.5623 | 4.791  | 8.09E-04 | 0.009 | -0.33 | -1.3483 | none       |
| GTF2IRD2I | 0.784 | 0.5857 | 4.7896 | 8.11E-04 | 0.009 | -0.33 | -0.6871 | none       |
| USP42     | 1.068 | 0.9472 | 4.7877 | 8.13E-04 | 0.009 | -0.33 | -1.4775 | none       |
| PODNL1    | 1.103 | 0.8698 | 4.7854 | 8.16E-04 | 0.009 | -0.33 | -0.8196 | none       |
| SMYD4     | 1.106 | 0.9447 | 4.7847 | 8.17E-04 | 0.009 | -0.34 | -1.4837 | none       |
| DHODH     | 0.873 | 0.7652 | 4.7845 | 8.17E-04 | 0.009 | -0.34 | -0.8486 | none       |
| C12ORF49  | 0.542 | 0.3323 | 4.783  | 8.19E-04 | 0.009 | -0.34 | -1.4283 | none       |
| C3ORF67   | 0.671 | 0.4702 | 4.7817 | 8.21E-04 | 0.009 | -0.34 | -1.0206 | none       |
| ZNF346    | 0.511 | 0.4467 | 4.7815 | 8.21E-04 | 0.009 | -0.34 | -0.4237 | none       |
| LIN52     | 0.712 | 0.5114 | 4.7779 | 8.25E-04 | 0.009 | -0.35 | -1.009  | none       |
| SH2D6     | 1.023 | 0.9541 | 4.7777 | 8.25E-04 | 0.009 | -0.35 | -0.7434 | none       |
| EFTUD2    | 0.588 | 0.4524 | 4.7772 | 8.26E-04 | 0.009 | -0.35 | -1.0474 | none       |
| ECHDC1    | 0.511 | 0.3608 | 4.777  | 8.26E-04 | 0.009 | -0.35 | -1.2079 | none       |
| C3ORF62   | 0.881 | 0.79   | 4.7764 | 8.27E-04 | 0.009 | -0.35 | -1.4568 | none       |
| SPDYE2    | 0.618 | 0.559  | 4.774  | 8.30E-04 | 0.009 | -0.35 | -0.4814 | none       |
| SMOC1     | 0.986 | 0.7774 | 4.773  | 8.31E-04 | 0.009 | -0.35 | -1.3287 | none       |
| SYAP1     | 0.655 | 0.5475 | 4.7714 | 8.33E-04 | 0.009 | -0.35 | -1.615  | OA-related |
| C1ORF50   | 0.779 | 0.6654 | 4.7698 | 8.35E-04 | 0.009 | -0.36 | -1.0708 | none       |
| APC       | 0.938 | 0.8297 | 4.7695 | 8.35E-04 | 0.009 | -0.36 | -1.3725 | none       |

|          |       |        |        |          |       |       |         |            |
|----------|-------|--------|--------|----------|-------|-------|---------|------------|
| PBLD     | 0.566 | 0.4137 | 4.7693 | 8.36E-04 | 0.009 | -0.36 | -0.8115 | none       |
| NMUR1    | 0.487 | 0.342  | 4.7685 | 8.37E-04 | 0.009 | -0.36 | -1.4401 | none       |
| MRPL10   | 0.618 | 0.3853 | 4.7667 | 8.39E-04 | 0.009 | -0.36 | -1.0283 | none       |
| FKRP     | 0.863 | 0.7657 | 4.7663 | 8.39E-04 | 0.009 | -0.36 | -1.4118 | none       |
| CCDC77   | 1.065 | 0.9027 | 4.7648 | 8.41E-04 | 0.009 | -0.36 | -1.2445 | none       |
| DBF4B    | 0.887 | 0.7578 | 4.7646 | 8.41E-04 | 0.009 | -0.36 | -1.6391 | OA-related |
| TRIM59   | 0.62  | 0.4623 | 4.7644 | 8.42E-04 | 0.009 | -0.37 | -1.3328 | none       |
| FAM221A  | 0.952 | 0.7689 | 4.7633 | 8.43E-04 | 0.009 | -0.37 | -1.356  | none       |
| PPIAL4E  | 0.476 | 0.3246 | 4.7632 | 8.43E-04 | 0.009 | -0.37 | 0.31    | none       |
| PLEKHG4B | 0.657 | 0.4667 | 4.7625 | 8.44E-04 | 0.009 | -0.37 | -1.1808 | none       |
| ATP7A    | 0.79  | 0.6604 | 4.7608 | 8.46E-04 | 0.009 | -0.37 | -1.1388 | none       |
| PPARA    | 0.633 | 0.4849 | 4.7597 | 8.48E-04 | 0.009 | -0.37 | -1.1852 | none       |
| TOR1AIP2 | 0.785 | 0.6223 | 4.7597 | 8.48E-04 | 0.009 | -0.37 | -1.6307 | OA-related |
| KCNJ16   | 0.611 | 0.4554 | 4.7578 | 8.50E-04 | 0.009 | -0.37 | -1.4489 | none       |
| CAMTA2   | 0.528 | 0.4393 | 4.7577 | 8.50E-04 | 0.009 | -0.38 | -1.4701 | none       |
| TRNT1    | 0.401 | 0.3129 | 4.7577 | 8.50E-04 | 0.009 | -0.38 | -0.8724 | none       |
| TAC4     | 1.315 | 1.0912 | 4.7558 | 8.52E-04 | 0.009 | -0.38 | -1.4146 | none       |
| DIS3L    | 1.096 | 0.9547 | 4.7548 | 8.54E-04 | 0.009 | -0.38 | -1.2589 | none       |
| NSG1     | 1.228 | 1.087  | 4.7523 | 8.57E-04 | 0.009 | -0.38 | -1.1751 | none       |
| SIDT1    | 0.96  | 0.78   | 4.7522 | 8.57E-04 | 0.009 | -0.38 | -1.5724 | OA-related |
| CANX     | 0.641 | 0.5057 | 4.752  | 8.57E-04 | 0.009 | -0.38 | 0.00615 | none       |
| LRRD1    | 0.558 | 0.4035 | 4.7483 | 8.62E-04 | 0.009 | -0.39 | -1.4548 | none       |
| MRM3     | 0.43  | 0.3468 | 4.748  | 8.62E-04 | 0.009 | -0.39 | -1.5365 | OA-related |
| MYLK3    | 0.577 | 0.4373 | 4.745  | 8.66E-04 | 0.009 | -0.39 | -1.4619 | none       |
| SLC26A4  | 0.641 | 0.5007 | 4.7441 | 8.67E-04 | 0.009 | -0.4  | -0.7819 | none       |
| UIMC1    | 1.001 | 0.8505 | 4.7427 | 8.69E-04 | 0.01  | -0.4  | -1.2342 | none       |
| BRIP1    | 0.896 | 0.7068 | 4.7418 | 8.70E-04 | 0.01  | -0.4  | -0.8218 | none       |
| GOLGA8R  | 0.517 | 0.4254 | 4.7409 | 8.71E-04 | 0.01  | -0.4  | -0.9933 | none       |
| NPIP5    | 1.183 | 1.0836 | 4.7395 | 8.73E-04 | 0.01  | -0.4  | -0.9619 | none       |
| GPSM2    | 0.977 | 0.8195 | 4.7393 | 8.73E-04 | 0.01  | -0.4  | -1.264  | none       |
| NCOA7    | 1.249 | 1.0932 | 4.7376 | 8.76E-04 | 0.01  | -0.4  | -1.3679 | none       |
| LOXL2    | 1.072 | 0.813  | 4.7372 | 8.76E-04 | 0.01  | -0.41 | -1.1673 | none       |
| CPSF4    | 0.644 | 0.5457 | 4.7359 | 8.78E-04 | 0.01  | -0.41 | -0.996  | none       |
| SHISA9   | 0.615 | 0.4371 | 4.7346 | 8.80E-04 | 0.01  | -0.41 | -1.4199 | none       |
| C11ORF49 | 0.454 | 0.3538 | 4.7331 | 8.81E-04 | 0.01  | -0.41 | -1.4349 | none       |
| PEX16    | 0.737 | 0.5663 | 4.7329 | 8.82E-04 | 0.01  | -0.41 | -1.2827 | none       |
| ZFAND4   | 0.528 | 0.405  | 4.7329 | 8.82E-04 | 0.01  | -0.41 | -1.098  | none       |
| FTO      | 0.724 | 0.5972 | 4.7328 | 8.82E-04 | 0.01  | -0.41 | -1.4608 | none       |
| NUP107   | 0.498 | 0.3826 | 4.7321 | 8.83E-04 | 0.01  | -0.41 | -1.1013 | none       |
| OR2AG2   | 0.478 | 0.3422 | 4.7306 | 8.85E-04 | 0.01  | -0.42 | -1.5814 | OA-related |

|          |        |         |        |          |      |       |         |            |
|----------|--------|---------|--------|----------|------|-------|---------|------------|
| BCO2     | 0.769  | 0.5861  | 4.7297 | 8.86E-04 | 0.01 | -0.42 | -1.4276 | none       |
| TRIM22   | 0.576  | 0.4177  | 4.7294 | 8.86E-04 | 0.01 | -0.42 | -0.7422 | none       |
| PPIAL4A  | -0.399 | -0.2657 | -4.727 | 8.90E-04 | 0.01 | -0.42 | 1.25335 | none       |
| FAM160B1 | 0.65   | 0.4657  | 4.7264 | 8.90E-04 | 0.01 | -0.42 | 0.03582 | none       |
| SERINC5  | 0.692  | 0.5179  | 4.7262 | 8.91E-04 | 0.01 | -0.42 | -1.4902 | none       |
| PRDM15   | 0.911  | 0.711   | 4.7246 | 8.93E-04 | 0.01 | -0.42 | -1.4437 | none       |
| SAFB2    | 1.047  | 0.9574  | 4.7242 | 8.93E-04 | 0.01 | -0.42 | -1.3379 | none       |
| GRAMD1A  | 0.756  | 0.6741  | 4.7234 | 8.94E-04 | 0.01 | -0.43 | -1.4384 | none       |
| CEP57L1  | 0.909  | 0.8129  | 4.7231 | 8.94E-04 | 0.01 | -0.43 | -1.0245 | none       |
| S1PR2    | 0.549  | 0.3932  | 4.7223 | 8.96E-04 | 0.01 | -0.43 | -1.6253 | OA-related |
| MAP2K7   | 0.847  | 0.6902  | 4.7221 | 8.96E-04 | 0.01 | -0.43 | -0.9624 | none       |
| FBXW10   | 1.024  | 0.7767  | 4.7216 | 8.97E-04 | 0.01 | -0.43 | -1.2735 | none       |
| PARD6B   | 0.635  | 0.4433  | 4.7201 | 8.99E-04 | 0.01 | -0.43 | -1.5846 | OA-related |
| FKBP9    | 0.604  | 0.5163  | 4.7165 | 9.03E-04 | 0.01 | -0.44 | -0.1004 | none       |
| PROM2    | 0.475  | 0.3384  | 4.7098 | 9.12E-04 | 0.01 | -0.45 | -0.9403 | none       |
| ACKR2    | 0.662  | 0.5239  | 4.7076 | 9.15E-04 | 0.01 | -0.45 | -1.0218 | none       |
| ASPH     | 0.874  | 0.7682  | 4.707  | 9.16E-04 | 0.01 | -0.45 | -1.2662 | none       |
| FOXK1    | 0.702  | 0.6348  | 4.7066 | 9.17E-04 | 0.01 | -0.45 | -1.3472 | none       |
| POU6F2   | 0.629  | 0.524   | 4.7064 | 9.17E-04 | 0.01 | -0.45 | -0.9948 | none       |
| MOK      | 0.884  | 0.6383  | 4.7047 | 9.19E-04 | 0.01 | -0.45 | -1.2985 | none       |
| ZNF687   | 0.722  | 0.6138  | 4.7043 | 9.20E-04 | 0.01 | -0.45 | -1.4654 | none       |
| PCSK6    | 0.603  | 0.4388  | 4.7042 | 9.20E-04 | 0.01 | -0.45 | -1.3522 | none       |
| IYD      | 0.646  | 0.5102  | 4.7036 | 9.21E-04 | 0.01 | -0.46 | -1.4636 | none       |
| AP4M1    | 0.74   | 0.5935  | 4.702  | 9.23E-04 | 0.01 | -0.46 | -0.7372 | none       |
| ZFP30    | 1.096  | 0.9619  | 4.7011 | 9.24E-04 | 0.01 | -0.46 | -1.5618 | OA-related |
| TIMM23B  | 0.692  | 0.5929  | 4.6992 | 9.27E-04 | 0.01 | -0.46 | -0.6604 | none       |
| VAV3     | 0.73   | 0.5509  | 4.6992 | 9.27E-04 | 0.01 | -0.46 | -0.7596 | none       |
| OSBPL1A  | 1.207  | 0.9894  | 4.6934 | 9.35E-04 | 0.01 | -0.47 | -1.1408 | none       |
| GRM6     | 0.624  | 0.4747  | 4.6934 | 9.35E-04 | 0.01 | -0.47 | -1.4438 | none       |
| RNF207   | 0.544  | 0.4851  | 4.692  | 9.37E-04 | 0.01 | -0.47 | -0.6841 | none       |
| LRRFIP2  | 0.843  | 0.6432  | 4.6917 | 9.37E-04 | 0.01 | -0.47 | -0.7808 | none       |
| ZNF780B  | 0.586  | 0.4566  | 4.6917 | 9.37E-04 | 0.01 | -0.47 | -1.1495 | none       |
| KIAA0586 | 1.177  | 1.0665  | 4.6913 | 9.38E-04 | 0.01 | -0.47 | -1.2711 | none       |
| SHE      | 0.529  | 0.3772  | 4.6912 | 9.38E-04 | 0.01 | -0.47 | -1.349  | none       |
| GPR83    | 0.414  | 0.3143  | 4.6892 | 9.41E-04 | 0.01 | -0.48 | -1.4775 | none       |
| RWDD2A   | 0.455  | 0.301   | 4.6892 | 9.41E-04 | 0.01 | -0.48 | -0.7293 | none       |
| GIMAP2   | 0.652  | 0.3798  | 4.6879 | 9.42E-04 | 0.01 | -0.48 | -1.1435 | none       |
| TUBGCP4  | 0.52   | 0.4305  | 4.6861 | 9.45E-04 | 0.01 | -0.48 | -0.3032 | none       |
| ZNF747   | 0.599  | 0.4521  | 4.6849 | 9.47E-04 | 0.01 | -0.48 | -1.3145 | none       |
| SEMA4F   | 0.53   | 0.3669  | 4.6847 | 9.47E-04 | 0.01 | -0.48 | -0.026  | none       |

|          |       |        |        |          |      |       |         |      |
|----------|-------|--------|--------|----------|------|-------|---------|------|
| ABCA13   | 0.503 | 0.3609 | 4.6823 | 9.50E-04 | 0.01 | -0.49 | -1.492  | none |
| STOM     | 0.457 | 0.3277 | 4.6818 | 9.51E-04 | 0.01 | -0.49 | -1.2439 | none |
| SH3BP5   | 0.791 | 0.6786 | 4.6811 | 9.52E-04 | 0.01 | -0.49 | -1.4325 | none |
| MCF2L    | 0.777 | 0.6727 | 4.6807 | 9.52E-04 | 0.01 | -0.49 | -0.7174 | none |
| TFDP2    | 0.678 | 0.5295 | 4.6805 | 9.53E-04 | 0.01 | -0.49 | -0.9407 | none |
| ZNF345   | 1.033 | 0.7851 | 4.6797 | 9.54E-04 | 0.01 | -0.49 | -1.2165 | none |
| R3HDM4   | 0.611 | 0.4342 | 4.6793 | 9.54E-04 | 0.01 | -0.49 | -0.1632 | none |
| MGP      | 0.82  | 0.5953 | 4.6785 | 9.56E-04 | 0.01 | -0.49 | -1.465  | none |
| POLQ     | 1.201 | 1.0832 | 4.676  | 9.59E-04 | 0.01 | -0.5  | -1.3949 | none |
| RABL2B   | 0.567 | 0.4367 | 4.6747 | 9.61E-04 | 0.01 | -0.5  | -1.075  | none |
| METTL7A  | 0.692 | 0.5241 | 4.6735 | 9.63E-04 | 0.01 | -0.5  | -1.4966 | none |
| RFC2     | 0.53  | 0.4085 | 4.6728 | 9.64E-04 | 0.01 | -0.5  | -1.4081 | none |
| CEP135   | 0.882 | 0.7812 | 4.6694 | 9.69E-04 | 0.01 | -0.51 | -1.3494 | none |
| AARSD1   | 0.483 | 0.3573 | 4.6665 | 9.73E-04 | 0.01 | -0.51 | -1.2661 | none |
| CNOT10   | 0.907 | 0.7408 | 4.6645 | 9.76E-04 | 0.01 | -0.51 | -1.1622 | none |
| USP33    | 0.874 | 0.7167 | 4.6644 | 9.76E-04 | 0.01 | -0.51 | -1.2789 | none |
| GBA      | 0.45  | 0.3143 | 4.6641 | 9.76E-04 | 0.01 | -0.51 | -1.0925 | none |
| SLC13A3  | 0.445 | 0.2938 | 4.664  | 9.76E-04 | 0.01 | -0.51 | -1.468  | none |
| SLC5A5   | 0.457 | 0.3244 | 4.6639 | 9.77E-04 | 0.01 | -0.51 | -1.3215 | none |
| SCAMP4   | 0.558 | 0.4317 | 4.6636 | 9.77E-04 | 0.01 | -0.51 | -1.3361 | none |
| LMO3     | 0.429 | 0.3131 | 4.6635 | 9.77E-04 | 0.01 | -0.51 | -0.5183 | none |
| MYO19    | 0.734 | 0.6394 | 4.6632 | 9.78E-04 | 0.01 | -0.51 | -1.4049 | none |
| KLHL5    | 0.665 | 0.5017 | 4.6626 | 9.78E-04 | 0.01 | -0.52 | -1.4817 | none |
| RBL2     | 0.596 | 0.461  | 4.6622 | 9.79E-04 | 0.01 | -0.52 | -0.6855 | none |
| ARL16    | 0.564 | 0.4163 | 4.6609 | 9.81E-04 | 0.01 | -0.52 | -1.3412 | none |
| TIGAR    | 0.643 | 0.4787 | 4.6595 | 9.83E-04 | 0.01 | -0.52 | -0.9759 | none |
| AK9      | 0.654 | 0.5022 | 4.6582 | 9.85E-04 | 0.01 | -0.52 | -1.3427 | none |
| CR1      | 0.391 | 0.2545 | 4.6577 | 9.86E-04 | 0.01 | -0.52 | -1.5053 | none |
| DFFB     | 0.598 | 0.3987 | 4.6568 | 9.87E-04 | 0.01 | -0.52 | -1.1593 | none |
| B3GALNT1 | 0.651 | 0.4568 | 4.6529 | 9.93E-04 | 0.01 | -0.53 | -1.175  | none |
| NOX4     | 0.382 | 0.2784 | 4.6519 | 9.94E-04 | 0.01 | -0.53 | -1.4127 | none |
| CTRB1    | 0.481 | 0.3347 | 4.6492 | 9.98E-04 | 0.01 | -0.54 | -1.3367 | none |
| CRTC2    | 0.703 | 0.632  | 4.6492 | 9.98E-04 | 0.01 | -0.54 | -1.3875 | none |
| APPBP2   | 0.539 | 0.3787 | 4.6471 | 0.001    | 0.01 | -0.54 | -0.1086 | none |
| TBL2     | 0.566 | 0.4499 | 4.646  | 0.001    | 0.01 | -0.54 | -0.8453 | none |
| CYP51A1  | 0.494 | 0.3506 | 4.645  | 0.001    | 0.01 | -0.54 | -1.2514 | none |
| ZNF619   | 0.543 | 0.4122 | 4.6408 | 0.00101  | 0.01 | -0.55 | -1.4552 | none |
| SLC25A51 | 0.458 | 0.3366 | 4.6396 | 0.00101  | 0.01 | -0.55 | -1.5052 | none |
| MITD1    | 0.648 | 0.4614 | 4.6395 | 0.00101  | 0.01 | -0.55 | -1.2299 | none |
| SLC28A2  | 0.708 | 0.5112 | 4.6394 | 0.00101  | 0.01 | -0.55 | -1.4273 | none |

|          |       |        |        |         |       |       |         |            |
|----------|-------|--------|--------|---------|-------|-------|---------|------------|
| PCDHA4   | 0.527 | 0.4043 | 4.6383 | 0.00101 | 0.01  | -0.55 | -1.5637 | OA-related |
| GOLGB1   | 0.831 | 0.721  | 4.6362 | 0.00102 | 0.01  | -0.56 | -1.0283 | none       |
| ORAI2    | 0.557 | 0.4515 | 4.6352 | 0.00102 | 0.01  | -0.56 | -1.2452 | none       |
| MAP3K15  | 0.481 | 0.3631 | 4.6349 | 0.00102 | 0.01  | -0.56 | -1.4423 | none       |
| KLHL26   | 0.758 | 0.5293 | 4.6349 | 0.00102 | 0.01  | -0.56 | -1.557  | OA-related |
| PAICS    | 0.49  | 0.3769 | 4.6349 | 0.00102 | 0.01  | -0.56 | -0.4215 | none       |
| ACTR3C   | 0.666 | 0.5356 | 4.6313 | 0.00103 | 0.011 | -0.56 | 0.06861 | none       |
| KLLN     | 0.564 | 0.3968 | 4.6312 | 0.00103 | 0.011 | -0.56 | -1.444  | none       |
| CCDC151  | 0.439 | 0.3158 | 4.6294 | 0.00103 | 0.011 | -0.57 | -1.5212 | none       |
| ZNF525   | 0.899 | 0.7225 | 4.6293 | 0.00103 | 0.011 | -0.57 | -1.1933 | none       |
| DCAF16   | 0.742 | 0.6151 | 4.6263 | 0.00103 | 0.011 | -0.57 | -1.3364 | none       |
| DTWD2    | 0.61  | 0.4675 | 4.6262 | 0.00103 | 0.011 | -0.57 | -1.4888 | none       |
| FBXL22   | 0.678 | 0.5127 | 4.6262 | 0.00103 | 0.011 | -0.57 | -1.1172 | none       |
| SPN      | 0.685 | 0.552  | 4.6262 | 0.00103 | 0.011 | -0.57 | -1.2991 | none       |
| D2HGDH   | 0.659 | 0.5301 | 4.6246 | 0.00104 | 0.011 | -0.57 | -1.0574 | none       |
| PCMTD2   | 0.491 | 0.3782 | 4.6237 | 0.00104 | 0.011 | -0.57 | -1.317  | none       |
| HES2     | 0.636 | 0.5084 | 4.6234 | 0.00104 | 0.011 | -0.57 | -0.9493 | none       |
| CLIP2    | 0.872 | 0.6568 | 4.6227 | 0.00104 | 0.011 | -0.58 | -1.3106 | none       |
| MOCOS    | 0.554 | 0.3945 | 4.6221 | 0.00104 | 0.011 | -0.58 | -1.2349 | none       |
| ARPIN    | 0.513 | 0.3979 | 4.622  | 0.00104 | 0.011 | -0.58 | -1.5239 | none       |
| LETM1    | 0.881 | 0.8096 | 4.622  | 0.00104 | 0.011 | -0.58 | -1.5623 | OA-related |
| DISP2    | 0.655 | 0.4691 | 4.6214 | 0.00104 | 0.011 | -0.58 | -1.4897 | none       |
| TRIM13   | 0.587 | 0.3867 | 4.6208 | 0.00104 | 0.011 | -0.58 | -1.3691 | none       |
| BAZ2B    | 0.771 | 0.7007 | 4.6208 | 0.00104 | 0.011 | -0.58 | -1.1373 | none       |
| TSPAN6   | 0.598 | 0.4326 | 4.6192 | 0.00104 | 0.011 | -0.58 | -1.4503 | none       |
| VPS53    | 0.722 | 0.6485 | 4.6188 | 0.00104 | 0.011 | -0.58 | -1.506  | none       |
| ECHDC2   | 0.52  | 0.3751 | 4.6185 | 0.00104 | 0.011 | -0.58 | -1.2469 | none       |
| BRI3     | 0.859 | 0.5934 | 4.6176 | 0.00105 | 0.011 | -0.58 | -1.1648 | none       |
| STARD6   | 0.841 | 0.6372 | 4.617  | 0.00105 | 0.011 | -0.58 | -1.2391 | none       |
| PARD6G   | 0.512 | 0.3887 | 4.6165 | 0.00105 | 0.011 | -0.58 | -1.1452 | none       |
| WDPCP    | 0.675 | 0.5364 | 4.6153 | 0.00105 | 0.011 | -0.59 | -1.5464 | OA-related |
| HSPA4L   | 0.74  | 0.6032 | 4.6141 | 0.00105 | 0.011 | -0.59 | -1.3855 | none       |
| C2ORF15  | 0.564 | 0.3587 | 4.6119 | 0.00106 | 0.011 | -0.59 | -0.7195 | none       |
| KIAA1958 | 0.642 | 0.5714 | 4.6117 | 0.00106 | 0.011 | -0.59 | -1.4172 | none       |
| ZSCAN22  | 0.588 | 0.4725 | 4.6089 | 0.00106 | 0.011 | -0.6  | -1.4824 | none       |
| ZNF233   | 0.704 | 0.5881 | 4.6078 | 0.00106 | 0.011 | -0.6  | -0.8246 | none       |
| CDON     | 0.56  | 0.4147 | 4.6073 | 0.00106 | 0.011 | -0.6  | -0.5225 | none       |
| PDZD7    | 0.662 | 0.5359 | 4.6073 | 0.00106 | 0.011 | -0.6  | -1.1838 | none       |
| KCNJ11   | 0.472 | 0.3567 | 4.6061 | 0.00106 | 0.011 | -0.6  | -1.2565 | none       |
| RPS6KB1  | 0.985 | 0.8529 | 4.6047 | 0.00107 | 0.011 | -0.6  | -1.2785 | none       |

|          |       |        |        |         |       |       |         |            |
|----------|-------|--------|--------|---------|-------|-------|---------|------------|
| CXORF58  | 0.41  | 0.2822 | 4.6044 | 0.00107 | 0.011 | -0.6  | -1.4831 | none       |
| ELOVL7   | 0.536 | 0.3847 | 4.6044 | 0.00107 | 0.011 | -0.6  | -1.2616 | none       |
| TRPM6    | 0.707 | 0.5716 | 4.6042 | 0.00107 | 0.011 | -0.6  | -1.3156 | none       |
| ANGPT1   | 0.656 | 0.486  | 4.6037 | 0.00107 | 0.011 | -0.6  | -0.9993 | none       |
| CASP10   | 1.154 | 0.9272 | 4.6018 | 0.00107 | 0.011 | -0.61 | -1.4589 | none       |
| CA12     | 0.469 | 0.358  | 4.6017 | 0.00107 | 0.011 | -0.61 | -1.1425 | none       |
| APBB3    | 0.489 | 0.4385 | 4.6007 | 0.00107 | 0.011 | -0.61 | 0.14157 | none       |
| ZNF180   | 0.597 | 0.4813 | 4.6001 | 0.00107 | 0.011 | -0.61 | -1.2205 | none       |
| PPM1F    | 0.788 | 0.6165 | 4.599  | 0.00108 | 0.011 | -0.61 | -1.2377 | none       |
| NIPAL3   | 0.502 | 0.3847 | 4.598  | 0.00108 | 0.011 | -0.61 | -1.5869 | OA-related |
| C2ORF83  | 0.667 | 0.5023 | 4.5971 | 0.00108 | 0.011 | -0.61 | -1.5864 | OA-related |
| CAMK2A   | 0.445 | 0.3081 | 4.597  | 0.00108 | 0.011 | -0.61 | -1.2105 | none       |
| ITPRIPL2 | 0.497 | 0.4197 | 4.5948 | 0.00108 | 0.011 | -0.62 | -1.4285 | none       |
| ZNF85    | 0.628 | 0.43   | 4.5934 | 0.00108 | 0.011 | -0.62 | -1.0555 | none       |
| STAT5B   | 0.743 | 0.63   | 4.593  | 0.00109 | 0.011 | -0.62 | -1.3752 | none       |
| LRRC27   | 0.619 | 0.5174 | 4.5929 | 0.00109 | 0.011 | -0.62 | -1.2328 | none       |
| FAM49B   | 0.486 | 0.3038 | 4.5881 | 0.00109 | 0.011 | -0.63 | -1.2311 | none       |
| MFSD8    | 0.907 | 0.6317 | 4.5877 | 0.00109 | 0.011 | -0.63 | -1.17   | none       |
| SEC14L4  | 0.413 | 0.3164 | 4.5861 | 0.0011  | 0.011 | -0.63 | -1.4338 | none       |
| HSBP1L1  | 0.565 | 0.3929 | 4.5852 | 0.0011  | 0.011 | -0.63 | -0.079  | none       |
| NICN1    | 0.572 | 0.3754 | 4.5837 | 0.0011  | 0.011 | -0.63 | -1.3546 | none       |
| CLCN3    | 0.739 | 0.6037 | 4.5825 | 0.0011  | 0.011 | -0.64 | -0.2296 | none       |
| HP       | 0.61  | 0.3932 | 4.5822 | 0.0011  | 0.011 | -0.64 | -1.3554 | none       |
| NUDT19   | 0.622 | 0.4457 | 4.5811 | 0.0011  | 0.011 | -0.64 | -1.5548 | OA-related |
| FAM83F   | 0.451 | 0.3402 | 4.5809 | 0.00111 | 0.011 | -0.64 | -1.3596 | none       |
| PNPLA3   | 0.619 | 0.4642 | 4.5806 | 0.00111 | 0.011 | -0.64 | -1.3663 | none       |
| MLIP     | 0.564 | 0.388  | 4.5797 | 0.00111 | 0.011 | -0.64 | -1.4626 | none       |
| ALDH3B1  | 0.935 | 0.7334 | 4.5795 | 0.00111 | 0.011 | -0.64 | -1.2149 | none       |
| SLC38A7  | 0.741 | 0.6423 | 4.5782 | 0.00111 | 0.011 | -0.64 | -1.416  | none       |
| SEMA3C   | 0.885 | 0.6485 | 4.5782 | 0.00111 | 0.011 | -0.64 | -1.0533 | none       |
| PPP1R16A | 0.771 | 0.6674 | 4.5775 | 0.00111 | 0.011 | -0.64 | -1.4282 | none       |
| AP000769 | 0.893 | 0.64   | 4.5757 | 0.00111 | 0.011 | -0.65 | -1.2226 | none       |
| STARD8   | 0.523 | 0.4316 | 4.575  | 0.00112 | 0.011 | -0.65 | -0.9528 | none       |
| TNKS     | 1.192 | 1.0258 | 4.5721 | 0.00112 | 0.011 | -0.65 | -1.4505 | none       |
| SEMA4C   | 0.747 | 0.6499 | 4.572  | 0.00112 | 0.011 | -0.65 | -1.3868 | none       |
| SPDYE3   | 0.998 | 0.8521 | 4.5718 | 0.00112 | 0.011 | -0.65 | -1.5008 | none       |
| PRR5     | 0.59  | 0.4314 | 4.5714 | 0.00112 | 0.011 | -0.65 | -1.1133 | none       |
| UVSSA    | 0.716 | 0.5979 | 4.5695 | 0.00112 | 0.011 | -0.66 | -0.9583 | none       |
| CARD18   | 0.566 | 0.4223 | 4.5694 | 0.00112 | 0.011 | -0.66 | -1.1458 | none       |
| LGI1     | 0.766 | 0.5859 | 4.5694 | 0.00112 | 0.011 | -0.66 | -1.399  | none       |

|          |       |        |        |         |       |       |         |            |
|----------|-------|--------|--------|---------|-------|-------|---------|------------|
| CAPRIN2  | 1.001 | 0.852  | 4.5686 | 0.00113 | 0.011 | -0.66 | -1.4227 | none       |
| CDH6     | 0.396 | 0.3012 | 4.5666 | 0.00113 | 0.011 | -0.66 | -0.9051 | none       |
| ANAPC5   | 0.434 | 0.3026 | 4.5662 | 0.00113 | 0.011 | -0.66 | -1.2418 | none       |
| MSH5     | 0.865 | 0.6607 | 4.5655 | 0.00113 | 0.011 | -0.66 | -0.9125 | none       |
| PTAFR    | 0.492 | 0.395  | 4.5643 | 0.00113 | 0.011 | -0.66 | -1.0611 | none       |
| CARD14   | 0.696 | 0.5226 | 4.5641 | 0.00113 | 0.011 | -0.66 | -1.2265 | none       |
| PLA2G7   | 0.468 | 0.3861 | 4.564  | 0.00113 | 0.011 | -0.66 | -1.1769 | none       |
| ARHGAP26 | 0.942 | 0.7922 | 4.5637 | 0.00113 | 0.011 | -0.66 | -1.2624 | none       |
| CASP8    | 0.796 | 0.6386 | 4.5626 | 0.00114 | 0.011 | -0.67 | -1.4813 | none       |
| LIN28A   | 0.726 | 0.5654 | 4.5613 | 0.00114 | 0.011 | -0.67 | -1.5846 | OA-related |
| APOPT1   | 0.699 | 0.545  | 4.5593 | 0.00114 | 0.011 | -0.67 | -1.2077 | none       |
| GAS2L3   | 0.588 | 0.4376 | 4.5589 | 0.00114 | 0.011 | -0.67 | -1.3319 | none       |
| SPATS2   | 0.889 | 0.7545 | 4.5584 | 0.00114 | 0.011 | -0.67 | -1.479  | none       |
| TJP2     | 1.032 | 0.9268 | 4.5565 | 0.00115 | 0.011 | -0.67 | -0.7844 | none       |
| POLK     | 0.905 | 0.7724 | 4.5563 | 0.00115 | 0.011 | -0.67 | -1.4017 | none       |
| AK7      | 1.45  | 1.2051 | 4.5563 | 0.00115 | 0.011 | -0.67 | -1.0721 | none       |
| TBC1D8B  | 0.65  | 0.5314 | 4.5558 | 0.00115 | 0.011 | -0.68 | -1.0091 | none       |
| KIAA2012 | 0.422 | 0.3256 | 4.5535 | 0.00115 | 0.011 | -0.68 | -1.6479 | OA-related |
| CLDN11   | 0.477 | 0.4384 | 4.5527 | 0.00115 | 0.011 | -0.68 | -0.9328 | none       |
| ATM      | 0.99  | 0.8195 | 4.5516 | 0.00115 | 0.011 | -0.68 | -1.5685 | OA-related |
| C1ORF174 | 0.489 | 0.3433 | 4.5506 | 0.00116 | 0.011 | -0.68 | -1.5683 | OA-related |
| DTD2     | 0.637 | 0.442  | 4.5504 | 0.00116 | 0.011 | -0.68 | -1.1276 | none       |
| ZBTB21   | 0.721 | 0.5499 | 4.5503 | 0.00116 | 0.011 | -0.68 | -1.0916 | none       |
| ZNF415   | 1.019 | 0.8116 | 4.5502 | 0.00116 | 0.011 | -0.68 | -1.2006 | none       |
| ARFGEF2  | 1.15  | 1.0395 | 4.5502 | 0.00116 | 0.011 | -0.68 | -1.3455 | none       |
| UCN      | 0.574 | 0.4907 | 4.5474 | 0.00116 | 0.011 | -0.69 | -1.0106 | none       |
| NAA60    | 0.68  | 0.5666 | 4.5474 | 0.00116 | 0.011 | -0.69 | -1.3182 | none       |
| TBC1D24  | 0.665 | 0.5701 | 4.5472 | 0.00116 | 0.011 | -0.69 | -1.2881 | none       |
| IQCC     | 0.723 | 0.6396 | 4.5471 | 0.00116 | 0.011 | -0.69 | -1.5717 | OA-related |
| FCAR     | 0.415 | 0.304  | 4.5471 | 0.00116 | 0.011 | -0.69 | -1.5988 | OA-related |
| FAM120A  | 0.581 | 0.4265 | 4.546  | 0.00116 | 0.011 | -0.69 | -1.2308 | none       |
| IQCG     | 0.913 | 0.801  | 4.545  | 0.00117 | 0.011 | -0.69 | -1.1775 | none       |
| GRTP1    | 0.618 | 0.4196 | 4.5443 | 0.00117 | 0.011 | -0.69 | -1.2902 | none       |
| TXK      | 0.652 | 0.4767 | 4.5443 | 0.00117 | 0.011 | -0.69 | -1.386  | none       |
| GGT6     | 0.554 | 0.4431 | 4.5424 | 0.00117 | 0.011 | -0.7  | -1.2283 | none       |
| USP29    | 1.235 | 0.9606 | 4.5409 | 0.00117 | 0.011 | -0.7  | -1.3359 | none       |
| SIGLEC11 | 0.669 | 0.4855 | 4.5406 | 0.00117 | 0.011 | -0.7  | -1.5107 | none       |
| SLC43A2  | 0.65  | 0.4848 | 4.5396 | 0.00118 | 0.011 | -0.7  | -1.064  | none       |
| TOP3A    | 0.895 | 0.7801 | 4.5386 | 0.00118 | 0.011 | -0.7  | -1.3046 | none       |
| OR2A5    | 0.823 | 0.6442 | 4.5379 | 0.00118 | 0.011 | -0.7  | -1.3829 | none       |

|          |       |        |        |         |       |       |         |            |
|----------|-------|--------|--------|---------|-------|-------|---------|------------|
| KIF19    | 0.729 | 0.5278 | 4.5374 | 0.00118 | 0.011 | -0.7  | -1.4279 | none       |
| ZNF318   | 1.012 | 0.8854 | 4.5364 | 0.00118 | 0.011 | -0.7  | -1.3729 | none       |
| AP1S3    | 0.842 | 0.7036 | 4.5352 | 0.00118 | 0.011 | -0.71 | -1.4699 | none       |
| TRABD2A  | 0.488 | 0.3624 | 4.5345 | 0.00118 | 0.011 | -0.71 | -1.183  | none       |
| OR2G6    | 0.411 | 0.3017 | 4.5321 | 0.00119 | 0.011 | -0.71 | -1.4277 | none       |
| KCTD1    | 0.957 | 0.851  | 4.5315 | 0.00119 | 0.011 | -0.71 | -1.4286 | none       |
| RNF115   | 0.547 | 0.3724 | 4.5315 | 0.00119 | 0.011 | -0.71 | -1.2342 | none       |
| HSD17B4  | 0.425 | 0.33   | 4.531  | 0.00119 | 0.011 | -0.71 | 1.00776 | none       |
| POLB     | 0.644 | 0.4266 | 4.5293 | 0.00119 | 0.011 | -0.72 | -1.1306 | none       |
| CAGE1    | 0.683 | 0.4955 | 4.5291 | 0.00119 | 0.011 | -0.72 | -1.4361 | none       |
| METTL15  | 0.472 | 0.3191 | 4.5282 | 0.0012  | 0.011 | -0.72 | -0.1507 | none       |
| KLRK1    | 0.556 | 0.3904 | 4.5271 | 0.0012  | 0.011 | -0.72 | -1.2558 | none       |
| APAF1    | 0.731 | 0.6271 | 4.5249 | 0.0012  | 0.011 | -0.72 | -0.1692 | none       |
| ZNF701   | 0.847 | 0.6952 | 4.5248 | 0.0012  | 0.011 | -0.72 | -1.3163 | none       |
| RAB22A   | 0.467 | 0.3438 | 4.5246 | 0.0012  | 0.011 | -0.72 | -1.2674 | none       |
| HTN1     | 0.593 | 0.4586 | 4.5243 | 0.0012  | 0.011 | -0.72 | -0.8758 | none       |
| MOCS3    | 0.558 | 0.361  | 4.5232 | 0.00121 | 0.011 | -0.72 | -1.0417 | none       |
| ZNF442   | 0.534 | 0.4282 | 4.523  | 0.00121 | 0.011 | -0.73 | -1.5837 | OA-related |
| FBN1     | 0.514 | 0.3919 | 4.5211 | 0.00121 | 0.011 | -0.73 | -1.4495 | none       |
| KRIT1    | 0.944 | 0.8584 | 4.5205 | 0.00121 | 0.012 | -0.73 | -1.2463 | none       |
| NLRP12   | 0.658 | 0.4904 | 4.5182 | 0.00121 | 0.012 | -0.73 | -1.3707 | none       |
| MCOLN3   | 0.399 | 0.3041 | 4.5176 | 0.00122 | 0.012 | -0.73 | -0.8179 | none       |
| DPH1     | 0.43  | 0.3092 | 4.517  | 0.00122 | 0.012 | -0.73 | -0.9153 | none       |
| RPP14    | 0.644 | 0.5418 | 4.517  | 0.00122 | 0.012 | -0.73 | -1.2295 | none       |
| OR52A1   | 0.479 | 0.3514 | 4.5152 | 0.00122 | 0.012 | -0.74 | -1.5621 | OA-related |
| WNT9B    | 0.491 | 0.3926 | 4.5148 | 0.00122 | 0.012 | -0.74 | -1.2173 | none       |
| TNNI1    | 0.447 | 0.317  | 4.5126 | 0.00122 | 0.012 | -0.74 | -1.5567 | OA-related |
| TMEM192  | 0.504 | 0.3476 | 4.512  | 0.00123 | 0.012 | -0.74 | -0.8999 | none       |
| CASP2    | 0.529 | 0.4107 | 4.5097 | 0.00123 | 0.012 | -0.75 | -1.584  | OA-related |
| UBA3     | 0.604 | 0.3862 | 4.5088 | 0.00123 | 0.012 | -0.75 | -1.1416 | none       |
| ABCA1    | 0.877 | 0.9274 | 4.507  | 0.00124 | 0.012 | -0.75 | 0.28462 | none       |
| HERC1    | 0.97  | 0.8848 | 4.5069 | 0.00124 | 0.012 | -0.75 | -1.4059 | none       |
| DPYSL5   | 0.468 | 0.3046 | 4.5067 | 0.00124 | 0.012 | -0.75 | -1.5128 | none       |
| RHBDD1   | 0.724 | 0.4971 | 4.5035 | 0.00124 | 0.012 | -0.75 | -1.0001 | none       |
| CDK17    | 0.5   | 0.4206 | 4.5031 | 0.00124 | 0.012 | -0.76 | -0.3743 | none       |
| HIST4H4  | 1.016 | 0.7377 | 4.5027 | 0.00124 | 0.012 | -0.76 | -1.1734 | none       |
| SLC22A13 | 0.537 | 0.4024 | 4.5023 | 0.00124 | 0.012 | -0.76 | 0.25982 | none       |
| FOXL2NB  | 0.376 | 0.281  | 4.5012 | 0.00125 | 0.012 | -0.76 | -1.18   | none       |
| SYNPO2   | 0.446 | 0.3551 | 4.5011 | 0.00125 | 0.012 | -0.76 | -1.4091 | none       |
| PDXK     | 0.505 | 0.4207 | 4.5004 | 0.00125 | 0.012 | -0.76 | -0.0808 | none       |



|          |       |        |        |         |       |       |         |            |
|----------|-------|--------|--------|---------|-------|-------|---------|------------|
| MLH1     | 0.605 | 0.5029 | 4.499  | 0.00125 | 0.012 | -0.76 | -1.1937 | none       |
| ERN1     | 0.63  | 0.5153 | 4.498  | 0.00125 | 0.012 | -0.76 | -0.7234 | none       |
| XRN1     | 1.145 | 1.0101 | 4.4969 | 0.00125 | 0.012 | -0.76 | -1.4666 | none       |
| ZNF20    | 1.106 | 0.9501 | 4.4968 | 0.00125 | 0.012 | -0.76 | -0.7659 | none       |
| SPAST    | 0.576 | 0.4107 | 4.496  | 0.00126 | 0.012 | -0.77 | -1.2718 | none       |
| TIMM44   | 0.607 | 0.557  | 4.4948 | 0.00126 | 0.012 | -0.77 | -1.3556 | none       |
| CASQ1    | 1.242 | 0.9393 | 4.4921 | 0.00126 | 0.012 | -0.77 | -0.7175 | none       |
| AP1G1    | 0.513 | 0.4095 | 4.4917 | 0.00126 | 0.012 | -0.77 | -1.5508 | OA-related |
| C21ORF58 | 0.613 | 0.5412 | 4.4896 | 0.00127 | 0.012 | -0.78 | -1.3513 | none       |
| TRPM3    | 0.529 | 0.3822 | 4.4872 | 0.00127 | 0.012 | -0.78 | -1.4517 | none       |
| GSDMC    | 0.495 | 0.3548 | 4.487  | 0.00127 | 0.012 | -0.78 | -1.3349 | none       |
| ZNF791   | 0.735 | 0.6153 | 4.4853 | 0.00128 | 0.012 | -0.78 | -1.6231 | OA-related |
| PRR19    | 0.688 | 0.5436 | 4.4825 | 0.00128 | 0.012 | -0.79 | -1.4158 | none       |
| DCAF8    | 0.648 | 0.6088 | 4.4805 | 0.00129 | 0.012 | -0.79 | -1.3154 | none       |
| ART4     | 0.486 | 0.3535 | 4.4802 | 0.00129 | 0.012 | -0.79 | -1.4704 | none       |
| C19ORF44 | 0.903 | 0.734  | 4.4795 | 0.00129 | 0.012 | -0.79 | -1.183  | none       |
| DOT1L    | 1.008 | 0.8996 | 4.4783 | 0.00129 | 0.012 | -0.79 | -1.4045 | none       |
| HSCB     | 0.918 | 0.67   | 4.4765 | 0.00129 | 0.012 | -0.8  | -0.9174 | none       |
| C3ORF33  | 0.666 | 0.5532 | 4.4762 | 0.00129 | 0.012 | -0.8  | -1.2125 | none       |
| ARRDC5   | 0.538 | 0.3743 | 4.4759 | 0.00129 | 0.012 | -0.8  | -1.4116 | none       |
| RAB33B   | 0.702 | 0.5575 | 4.4739 | 0.0013  | 0.012 | -0.8  | -0.9391 | none       |
| HMX3     | 0.472 | 0.3679 | 4.4738 | 0.0013  | 0.012 | -0.8  | -1.0892 | none       |
| VAV1     | 0.937 | 0.8186 | 4.4697 | 0.00131 | 0.012 | -0.81 | -1.4058 | none       |
| NRG3     | 0.484 | 0.391  | 4.4689 | 0.00131 | 0.012 | -0.81 | -0.2876 | none       |
| ANKRD13  | 0.799 | 0.6636 | 4.4673 | 0.00131 | 0.012 | -0.81 | -1.3673 | none       |
| SRL      | 0.54  | 0.3823 | 4.4661 | 0.00131 | 0.012 | -0.81 | -1.3606 | none       |
| LIX1L    | 0.478 | 0.2773 | 4.465  | 0.00132 | 0.012 | -0.81 | -1.2886 | none       |
| ALDH8A1  | 0.913 | 0.6676 | 4.4634 | 0.00132 | 0.012 | -0.82 | -1.0881 | none       |
| LCN15    | 0.507 | 0.3598 | 4.4633 | 0.00132 | 0.012 | -0.82 | -1.1728 | none       |
| FOXI3    | 0.457 | 0.3113 | 4.4633 | 0.00132 | 0.012 | -0.82 | -1.4869 | none       |
| GNA11    | 1.361 | 1.1437 | 4.4632 | 0.00132 | 0.012 | -0.82 | -0.7652 | none       |
| PPP5D1   | 0.608 | 0.4537 | 4.4616 | 0.00132 | 0.012 | -0.82 | -1.0157 | none       |
| ISLR2    | 0.559 | 0.4049 | 4.4594 | 0.00133 | 0.012 | -0.82 | -1.0564 | none       |
| SYT15    | 0.923 | 0.7192 | 4.4589 | 0.00133 | 0.012 | -0.82 | -1.2581 | none       |
| UBXN7    | 1.021 | 0.8421 | 4.4549 | 0.00134 | 0.012 | -0.83 | -1.3857 | none       |
| SPINK9   | 0.465 | 0.3904 | 4.4532 | 0.00134 | 0.012 | -0.83 | -0.7572 | none       |
| GDF5     | 0.481 | 0.3694 | 4.4499 | 0.00135 | 0.012 | -0.84 | -1.2322 | none       |
| NLRP2    | 0.88  | 0.8675 | 4.4489 | 0.00135 | 0.012 | -0.84 | -1.0209 | none       |
| FGD4     | 0.608 | 0.4733 | 4.4462 | 0.00135 | 0.012 | -0.84 | -1.2688 | none       |
| SV2C     | 0.429 | 0.3099 | 4.4459 | 0.00135 | 0.012 | -0.84 | -1.3938 | none       |

|          |       |        |        |         |       |       |         |            |
|----------|-------|--------|--------|---------|-------|-------|---------|------------|
| CAMKK2   | 0.537 | 0.5181 | 4.4454 | 0.00136 | 0.012 | -0.84 | -0.2215 | none       |
| ZNF394   | 0.508 | 0.3707 | 4.4427 | 0.00136 | 0.012 | -0.85 | -1.5624 | OA-related |
| APOBEC3C | 0.744 | 0.6253 | 4.4426 | 0.00136 | 0.012 | -0.85 | -1.5233 | none       |
| ZNF227   | 1.063 | 0.851  | 4.4425 | 0.00136 | 0.012 | -0.85 | -1.166  | none       |
| RABL2A   | 0.641 | 0.5952 | 4.4424 | 0.00136 | 0.012 | -0.85 | -0.6489 | none       |
| ZNF774   | 0.754 | 0.5806 | 4.4421 | 0.00136 | 0.012 | -0.85 | -1.0139 | none       |
| ORC6     | 0.609 | 0.5042 | 4.442  | 0.00136 | 0.012 | -0.85 | -0.9919 | none       |
| SPAG9    | 1.39  | 1.2283 | 4.4415 | 0.00136 | 0.012 | -0.85 | -1.5177 | none       |
| MIXL1    | 0.473 | 0.3669 | 4.4413 | 0.00136 | 0.012 | -0.85 | -1.3563 | none       |
| CEACAM5  | 0.593 | 0.4305 | 4.4409 | 0.00136 | 0.012 | -0.85 | -0.6663 | none       |
| VSIG1    | 0.656 | 0.5264 | 4.4386 | 0.00137 | 0.013 | -0.85 | -1.3155 | none       |
| WSB2     | 0.687 | 0.4606 | 4.4379 | 0.00137 | 0.013 | -0.85 | -1.365  | none       |
| HAMP     | 0.74  | 0.536  | 4.4371 | 0.00137 | 0.013 | -0.86 | -1.4054 | none       |
| CACNB4   | 0.629 | 0.4767 | 4.437  | 0.00137 | 0.013 | -0.86 | -1.6216 | OA-related |
| WDR76    | 0.58  | 0.4344 | 4.4359 | 0.00138 | 0.013 | -0.86 | -1.1236 | none       |
| UNC80    | 0.812 | 0.6287 | 4.4356 | 0.00138 | 0.013 | -0.86 | -0.988  | none       |
| SHF      | 0.655 | 0.4919 | 4.4335 | 0.00138 | 0.013 | -0.86 | -1.1208 | none       |
| B3GALNT2 | 0.46  | 0.4155 | 4.433  | 0.00138 | 0.013 | -0.86 | -0.9373 | none       |
| ZNF616   | 0.915 | 0.7469 | 4.4325 | 0.00138 | 0.013 | -0.86 | -1.0722 | none       |
| CHAMP1   | 0.687 | 0.5759 | 4.4324 | 0.00138 | 0.013 | -0.86 | -1.1669 | none       |
| CHGB     | 0.846 | 0.6372 | 4.432  | 0.00138 | 0.013 | -0.86 | -1.363  | none       |
| C12ORF4  | 0.807 | 0.7217 | 4.4311 | 0.00139 | 0.013 | -0.86 | -0.8795 | none       |
| PDPK1    | 0.801 | 0.6398 | 4.4306 | 0.00139 | 0.013 | -0.87 | -1.1896 | none       |
| TMEM209  | 1.039 | 0.8214 | 4.4294 | 0.00139 | 0.013 | -0.87 | -1.3636 | none       |
| CDH7     | 0.399 | 0.3132 | 4.4288 | 0.00139 | 0.013 | -0.87 | -1.2928 | none       |
| TMOD2    | 0.383 | 0.2619 | 4.4287 | 0.00139 | 0.013 | -0.87 | -0.5912 | none       |
| TMEM41A  | 0.505 | 0.3489 | 4.4283 | 0.00139 | 0.013 | -0.87 | -1.0717 | none       |
| C6ORF203 | 0.634 | 0.4748 | 4.4281 | 0.00139 | 0.013 | -0.87 | -1.3736 | none       |
| SMG1     | 0.904 | 0.8295 | 4.4276 | 0.00139 | 0.013 | -0.87 | -1.4496 | none       |
| ZNF230   | 0.775 | 0.5428 | 4.4275 | 0.00139 | 0.013 | -0.87 | -1.2608 | none       |
| FBXL18   | 0.772 | 0.6252 | 4.4272 | 0.00139 | 0.013 | -0.87 | -1.5464 | OA-related |
| NIPA1    | 0.549 | 0.4211 | 4.4266 | 0.00139 | 0.013 | -0.87 | -1.3273 | none       |
| CDH10    | 0.648 | 0.4934 | 4.4264 | 0.0014  | 0.013 | -0.87 | -1.3245 | none       |
| SLC12A4  | 0.692 | 0.5566 | 4.4257 | 0.0014  | 0.013 | -0.87 | -1.0614 | none       |
| XIAP     | 0.741 | 0.6425 | 4.4256 | 0.0014  | 0.013 | -0.87 | -1.038  | none       |
| GART     | 0.403 | 0.3103 | 4.4256 | 0.0014  | 0.013 | -0.87 | -0.7357 | none       |
| EYA1     | 0.76  | 0.5829 | 4.4256 | 0.0014  | 0.013 | -0.87 | -1.4106 | none       |
| FAM193B  | 0.851 | 0.7782 | 4.4249 | 0.0014  | 0.013 | -0.87 | -1.3667 | none       |
| MLXIP    | 0.892 | 0.7889 | 4.4248 | 0.0014  | 0.013 | -0.87 | -1.5042 | none       |
| GLYR1    | 0.821 | 0.7239 | 4.4246 | 0.0014  | 0.013 | -0.87 | -0.8321 | none       |

|           |       |        |        |         |       |       |         |            |
|-----------|-------|--------|--------|---------|-------|-------|---------|------------|
| ZNF578    | 0.715 | 0.5769 | 4.4244 | 0.0014  | 0.013 | -0.87 | -1.6009 | OA-related |
| G6PC      | 0.505 | 0.3959 | 4.4241 | 0.0014  | 0.013 | -0.87 | -1.3642 | none       |
| PHKB      | 0.869 | 0.7196 | 4.4237 | 0.0014  | 0.013 | -0.88 | -1.1139 | none       |
| CAMK1D    | 0.779 | 0.6136 | 4.4235 | 0.0014  | 0.013 | -0.88 | -1.4009 | none       |
| CNPY1     | 0.496 | 0.393  | 4.423  | 0.0014  | 0.013 | -0.88 | -0.6934 | none       |
| DOCK6     | 0.704 | 0.5647 | 4.4225 | 0.0014  | 0.013 | -0.88 | 0.19843 | none       |
| TOR3A     | 0.574 | 0.4156 | 4.422  | 0.0014  | 0.013 | -0.88 | -1.179  | none       |
| KIAA0100  | 0.803 | 0.7071 | 4.4218 | 0.00141 | 0.013 | -0.88 | -1.2817 | none       |
| PEAK1     | 0.992 | 0.8393 | 4.4215 | 0.00141 | 0.013 | -0.88 | -1.1349 | none       |
| ADCY7     | 0.793 | 0.6797 | 4.4171 | 0.00142 | 0.013 | -0.89 | -1.1946 | none       |
| ZNF766    | 1.178 | 1.0164 | 4.4164 | 0.00142 | 0.013 | -0.89 | -1.2114 | none       |
| NKIRAS2   | 0.545 | 0.398  | 4.4134 | 0.00142 | 0.013 | -0.89 | -1.2057 | none       |
| FUT11     | 0.695 | 0.6299 | 4.4134 | 0.00142 | 0.013 | -0.89 | -1.1543 | none       |
| SLIT3     | 0.447 | 0.3122 | 4.4131 | 0.00142 | 0.013 | -0.89 | -1.524  | none       |
| SPNS1     | 0.493 | 0.3416 | 4.4129 | 0.00142 | 0.013 | -0.89 | -0.8645 | none       |
| RCC1L     | 0.455 | 0.368  | 4.4126 | 0.00142 | 0.013 | -0.89 | -1.0101 | none       |
| RTN2      | 0.811 | 0.6173 | 4.4123 | 0.00143 | 0.013 | -0.89 | -0.3808 | none       |
| VENTX     | 0.422 | 0.3264 | 4.4118 | 0.00143 | 0.013 | -0.89 | -1.2875 | none       |
| CACNA1D   | 0.669 | 0.5597 | 4.4106 | 0.00143 | 0.013 | -0.9  | -1.081  | none       |
| HRG       | 0.939 | 0.7175 | 4.4091 | 0.00143 | 0.013 | -0.9  | -1.3232 | none       |
| KAT6B     | 0.785 | 0.688  | 4.4081 | 0.00143 | 0.013 | -0.9  | -1.3898 | none       |
| LRRC8B    | 0.483 | 0.4004 | 4.4072 | 0.00144 | 0.013 | -0.9  | -0.4317 | none       |
| NEK4      | 1.091 | 0.9609 | 4.4064 | 0.00144 | 0.013 | -0.9  | -1.0592 | none       |
| TCTA      | 0.59  | 0.429  | 4.4061 | 0.00144 | 0.013 | -0.9  | -1.2492 | none       |
| NANOS1    | 0.492 | 0.3694 | 4.405  | 0.00144 | 0.013 | -0.9  | -1.4512 | none       |
| FAM53C    | 0.574 | 0.4141 | 4.4049 | 0.00144 | 0.013 | -0.9  | -1.241  | none       |
| CRISPLD2  | 0.498 | 0.3617 | 4.4047 | 0.00144 | 0.013 | -0.9  | -1.3748 | none       |
| IFT22     | 0.563 | 0.3725 | 4.4047 | 0.00144 | 0.013 | -0.9  | -1.4408 | none       |
| HMG20B    | 0.6   | 0.4427 | 4.4045 | 0.00144 | 0.013 | -0.9  | -1.1446 | none       |
| SERPINA10 | 0.475 | 0.3757 | 4.4039 | 0.00144 | 0.013 | -0.91 | -1.3135 | none       |
| AK3       | 0.432 | 0.3245 | 4.4033 | 0.00145 | 0.013 | -0.91 | 0.56581 | none       |
| IGFL2     | 0.461 | 0.3806 | 4.4026 | 0.00145 | 0.013 | -0.91 | -0.6477 | none       |
| PTGES     | 0.745 | 0.5744 | 4.4004 | 0.00145 | 0.013 | -0.91 | -1.3032 | none       |
| ZNF749    | 0.687 | 0.6602 | 4.3999 | 0.00145 | 0.013 | -0.91 | -0.1857 | none       |
| SRGAP2    | 1.2   | 1.0905 | 4.3992 | 0.00145 | 0.013 | -0.91 | -1.1301 | none       |
| TRIP11    | 0.74  | 0.7286 | 4.3985 | 0.00146 | 0.013 | -0.91 | -1.0284 | none       |
| GBP6      | 0.585 | 0.4029 | 4.3978 | 0.00146 | 0.013 | -0.92 | -1.0324 | none       |
| STAM2     | 0.84  | 0.6785 | 4.3969 | 0.00146 | 0.013 | -0.92 | -1.3204 | none       |
| SECISBP2L | 1.123 | 0.9523 | 4.3968 | 0.00146 | 0.013 | -0.92 | -1.284  | none       |
| TSC2      | 0.752 | 0.7128 | 4.3955 | 0.00146 | 0.013 | -0.92 | -1.0114 | none       |

|          |       |        |        |         |       |       |         |            |
|----------|-------|--------|--------|---------|-------|-------|---------|------------|
| C14ORF17 | 1.367 | 1.1237 | 4.395  | 0.00146 | 0.013 | -0.92 | -1.0428 | none       |
| VKORC1L1 | 0.533 | 0.3576 | 4.3935 | 0.00147 | 0.013 | -0.92 | -1.0594 | none       |
| ADAMTS2  | 0.344 | 0.263  | 4.3919 | 0.00147 | 0.013 | -0.92 | -0.2096 | none       |
| SCUBE3   | 0.478 | 0.3549 | 4.3918 | 0.00147 | 0.013 | -0.92 | -1.3277 | none       |
| CELA2A   | 0.859 | 0.6602 | 4.3915 | 0.00147 | 0.013 | -0.92 | -1.215  | none       |
| PIGB     | 0.812 | 0.5708 | 4.3914 | 0.00147 | 0.013 | -0.92 | -1.1006 | none       |
| SLC25A16 | 0.695 | 0.4616 | 4.3906 | 0.00147 | 0.013 | -0.93 | -1.1362 | none       |
| HDAC4    | 0.915 | 0.8195 | 4.389  | 0.00148 | 0.013 | -0.93 | -0.9895 | none       |
| ZNF253   | 0.729 | 0.6044 | 4.3884 | 0.00148 | 0.013 | -0.93 | -0.6026 | none       |
| PLK3     | 0.678 | 0.5776 | 4.3864 | 0.00148 | 0.013 | -0.93 | -1.2394 | none       |
| SLC6A14  | 0.36  | 0.2585 | 4.3855 | 0.00148 | 0.013 | -0.93 | -1.1807 | none       |
| REV3L    | 1.122 | 0.9937 | 4.3854 | 0.00149 | 0.013 | -0.93 | -1.3124 | none       |
| REEP2    | 0.563 | 0.4981 | 4.3829 | 0.00149 | 0.013 | -0.94 | -1.2506 | none       |
| SOGA1    | 0.424 | 0.3559 | 4.3807 | 0.0015  | 0.013 | -0.94 | -1.3963 | none       |
| NLGN4X   | 0.731 | 0.5203 | 4.3806 | 0.0015  | 0.013 | -0.94 | -1.3099 | none       |
| NUP43    | 0.896 | 0.7642 | 4.38   | 0.0015  | 0.013 | -0.94 | -1.1921 | none       |
| NLN      | 0.645 | 0.5517 | 4.3798 | 0.0015  | 0.013 | -0.94 | -1.0986 | none       |
| MGRN1    | 0.557 | 0.4653 | 4.3796 | 0.0015  | 0.013 | -0.94 | -1.078  | none       |
| POU5F2   | 0.466 | 0.344  | 4.3796 | 0.0015  | 0.013 | -0.94 | -1.5476 | OA-related |
| ATXN7L1  | 0.526 | 0.4098 | 4.379  | 0.0015  | 0.013 | -0.94 | -0.8804 | none       |
| SUN1     | 0.483 | 0.4004 | 4.3789 | 0.0015  | 0.013 | -0.94 | -0.6371 | none       |
| ZNF765   | 0.859 | 0.7404 | 4.3786 | 0.0015  | 0.013 | -0.94 | -1.548  | OA-related |
| ZNF669   | 0.861 | 0.6922 | 4.3779 | 0.0015  | 0.013 | -0.95 | -1.5703 | OA-related |
| RFX5     | 0.597 | 0.4966 | 4.3763 | 0.00151 | 0.013 | -0.95 | -1.208  | none       |
| OSBPL9   | 0.516 | 0.3797 | 4.3759 | 0.00151 | 0.013 | -0.95 | -0.5673 | none       |
| GALNT16  | 0.497 | 0.354  | 4.3743 | 0.00151 | 0.013 | -0.95 | -1.5567 | OA-related |
| C1ORF61  | 0.677 | 0.4025 | 4.3732 | 0.00151 | 0.013 | -0.95 | -1.3859 | none       |
| SLC2A4   | 0.5   | 0.3657 | 4.3732 | 0.00151 | 0.013 | -0.95 | -1.1792 | none       |
| SDS      | 0.507 | 0.4633 | 4.3723 | 0.00152 | 0.013 | -0.95 | -1.0638 | none       |
| TYK2     | 0.785 | 0.682  | 4.3705 | 0.00152 | 0.013 | -0.96 | -1.1798 | none       |
| FAM83B   | 0.478 | 0.3483 | 4.3697 | 0.00152 | 0.013 | -0.96 | -1.4169 | none       |
| SLC25A40 | 0.684 | 0.4959 | 4.3694 | 0.00152 | 0.013 | -0.96 | -0.3576 | none       |
| C1QTNF1  | 0.612 | 0.5087 | 4.3674 | 0.00153 | 0.013 | -0.96 | -1.3012 | none       |
| P2RX6    | 0.672 | 0.5063 | 4.3659 | 0.00153 | 0.013 | -0.96 | -1.4347 | none       |
| DOC2A    | 1.027 | 0.7851 | 4.3658 | 0.00153 | 0.013 | -0.96 | -1.2344 | none       |
| LIPH     | 0.544 | 0.4297 | 4.3649 | 0.00153 | 0.013 | -0.97 | -1.5789 | OA-related |
| EBF2     | 0.652 | 0.5102 | 4.3647 | 0.00153 | 0.013 | -0.97 | -1.284  | none       |
| ABHD1    | 0.677 | 0.5003 | 4.3643 | 0.00153 | 0.013 | -0.97 | -1.05   | none       |
| MECP2    | 1.1   | 0.9874 | 4.3643 | 0.00153 | 0.013 | -0.97 | -1.2536 | none       |
| TBX4     | 0.614 | 0.4571 | 4.3635 | 0.00154 | 0.013 | -0.97 | -1.2251 | none       |

|          |        |         |        |         |       |       |         |            |
|----------|--------|---------|--------|---------|-------|-------|---------|------------|
| ASPA     | 0.394  | 0.2882  | 4.3625 | 0.00154 | 0.013 | -0.97 | -1.4867 | none       |
| OTOA     | 0.425  | 0.2945  | 4.3622 | 0.00154 | 0.013 | -0.97 | -1.2157 | none       |
| ZNF131   | 0.753  | 0.6003  | 4.362  | 0.00154 | 0.013 | -0.97 | -1.4593 | none       |
| TPH1     | 0.412  | 0.3056  | 4.3616 | 0.00154 | 0.013 | -0.97 | -1.417  | none       |
| CFL1     | -0.467 | -0.3924 | -4.361 | 0.00154 | 0.013 | -0.97 | 2.69753 | AA-related |
| RAB40B   | 0.685  | 0.4313  | 4.3611 | 0.00154 | 0.013 | -0.97 | -1.0657 | none       |
| NUMB     | 0.647  | 0.5465  | 4.3607 | 0.00154 | 0.013 | -0.97 | -0.4546 | none       |
| SIN3B    | 0.844  | 0.7572  | 4.3603 | 0.00154 | 0.013 | -0.97 | -1.2493 | none       |
| TIMM17A  | 0.56   | 0.3663  | 4.3591 | 0.00155 | 0.013 | -0.97 | -1.3573 | none       |
| GUCA1B   | 0.457  | 0.3444  | 4.3582 | 0.00155 | 0.013 | -0.98 | -1.5571 | OA-related |
| PRELID3A | 0.813  | 0.7075  | 4.3574 | 0.00155 | 0.013 | -0.98 | -1.136  | none       |
| TMEM220  | 0.786  | 0.5866  | 4.3568 | 0.00155 | 0.013 | -0.98 | -1.0827 | none       |
| SLC4A7   | 0.461  | 0.3791  | 4.3561 | 0.00155 | 0.013 | -0.98 | -0.7544 | none       |
| RND1     | 0.638  | 0.4833  | 4.3557 | 0.00155 | 0.013 | -0.98 | -0.8653 | none       |
| TMEM17   | 0.657  | 0.4983  | 4.3555 | 0.00155 | 0.013 | -0.98 | -1.3914 | none       |
| UNKL     | 0.61   | 0.5377  | 4.3542 | 0.00156 | 0.013 | -0.98 | -1.1414 | none       |
| ARHGEF15 | 0.719  | 0.5384  | 4.354  | 0.00156 | 0.013 | -0.98 | -1.2067 | none       |
| CCL5     | 0.675  | 0.5712  | 4.3534 | 0.00156 | 0.013 | -0.98 | -1.1018 | none       |
| SYCP1    | 1.276  | 0.8801  | 4.3529 | 0.00156 | 0.013 | -0.98 | -0.0128 | none       |
| COQ5     | 0.557  | 0.3923  | 4.3528 | 0.00156 | 0.013 | -0.98 | -1.3634 | none       |
| NPIPA5   | 0.627  | 0.426   | 4.3527 | 0.00156 | 0.013 | -0.98 | -0.8546 | none       |
| CSNK1E   | 0.695  | 0.6034  | 4.3515 | 0.00156 | 0.013 | -0.99 | -1.5227 | none       |
| KLHL8    | 0.497  | 0.3526  | 4.3505 | 0.00157 | 0.013 | -0.99 | -1.1994 | none       |
| NEDD1    | 0.651  | 0.4607  | 4.35   | 0.00157 | 0.013 | -0.99 | -0.6581 | none       |
| ETV5     | 0.857  | 0.7437  | 4.3488 | 0.00157 | 0.013 | -0.99 | -0.7355 | none       |
| GMPR     | 0.7    | 0.4467  | 4.3483 | 0.00157 | 0.013 | -0.99 | -1.3819 | none       |
| CGN      | 0.573  | 0.531   | 4.3475 | 0.00157 | 0.013 | -0.99 | -0.4312 | none       |
| COX6B2   | 0.664  | 0.5032  | 4.3469 | 0.00158 | 0.013 | -0.99 | -1.3129 | none       |
| TMPRSS12 | 0.489  | 0.3692  | 4.3466 | 0.00158 | 0.013 | -0.99 | -1.1527 | none       |
| SCAF8    | 1.256  | 1.1208  | 4.3458 | 0.00158 | 0.013 | -0.99 | -0.5128 | none       |
| KLF17    | 0.424  | 0.2973  | 4.3458 | 0.00158 | 0.013 | -0.99 | -1.0861 | none       |
| BANP     | 0.553  | 0.5251  | 4.3457 | 0.00158 | 0.013 | -0.99 | -1.1701 | none       |
| TUBGCP6  | 0.701  | 0.6319  | 4.3453 | 0.00158 | 0.013 | -1    | -1.2037 | none       |
| KBTBD6   | 0.578  | 0.4248  | 4.3445 | 0.00158 | 0.013 | -1    | -0.8246 | none       |
| ASZ1     | 0.435  | 0.311   | 4.3443 | 0.00158 | 0.013 | -1    | -1.0057 | none       |
| BCORL1   | 0.756  | 0.6085  | 4.344  | 0.00158 | 0.013 | -1    | -0.8891 | none       |
| ACSF2    | 0.642  | 0.5315  | 4.3426 | 0.00159 | 0.013 | -1    | -1.502  | none       |
| MTRF1    | 0.85   | 0.695   | 4.3425 | 0.00159 | 0.013 | -1    | -1.0353 | none       |
| TNS3     | 0.797  | 0.8018  | 4.3411 | 0.00159 | 0.013 | -1    | -0.4242 | none       |
| MIER1    | 0.627  | 0.4443  | 4.3406 | 0.00159 | 0.013 | -1    | -1.3812 | none       |

|           |        |         |        |         |       |       |         |            |
|-----------|--------|---------|--------|---------|-------|-------|---------|------------|
| NUP98     | 0.792  | 0.7064  | 4.3403 | 0.00159 | 0.013 | -1    | -1.3198 | none       |
| USP22     | 0.632  | 0.5559  | 4.3391 | 0.00159 | 0.013 | -1.01 | -1.2961 | none       |
| GPHN      | 0.841  | 0.7425  | 4.339  | 0.00159 | 0.013 | -1.01 | -1.3502 | none       |
| RP1       | 0.673  | 0.5069  | 4.339  | 0.00159 | 0.013 | -1.01 | -1.3397 | none       |
| ADRB2     | 0.363  | 0.2671  | 4.3389 | 0.00159 | 0.013 | -1.01 | -1.403  | none       |
| OR2T33    | 0.381  | 0.2803  | 4.3386 | 0.0016  | 0.013 | -1.01 | -1.1031 | none       |
| MIA3      | 1.03   | 0.9091  | 4.3372 | 0.0016  | 0.013 | -1.01 | -1.1919 | none       |
| ARL11     | 0.459  | 0.295   | 4.3369 | 0.0016  | 0.013 | -1.01 | -1.3223 | none       |
| PSG5      | 1.068  | 0.8022  | 4.3338 | 0.00161 | 0.014 | -1.01 | -1.2664 | none       |
| FFAR2     | 0.87   | 0.6343  | 4.3322 | 0.00161 | 0.014 | -1.02 | -0.9232 | none       |
| ZNF200    | 0.462  | 0.3411  | 4.3302 | 0.00162 | 0.014 | -1.02 | -1.4969 | none       |
| JKAMP     | 0.651  | 0.4073  | 4.3293 | 0.00162 | 0.014 | -1.02 | -0.9702 | none       |
| GRIFIN    | -0.37  | -0.2384 | -4.329 | 0.00162 | 0.014 | -1.02 | 1.93287 | none       |
| CASC1     | 0.484  | 0.2688  | 4.3279 | 0.00162 | 0.014 | -1.02 | -1.0545 | none       |
| TTC38     | 0.782  | 0.6018  | 4.3275 | 0.00162 | 0.014 | -1.02 | -1.1706 | none       |
| BLOC1S3   | 0.723  | 0.5377  | 4.3269 | 0.00162 | 0.014 | -1.02 | -1.5821 | OA-related |
| MFAP3     | 0.725  | 0.5178  | 4.3261 | 0.00163 | 0.014 | -1.02 | -1.437  | none       |
| MPP4      | 0.517  | 0.3654  | 4.3254 | 0.00163 | 0.014 | -1.03 | -1.0575 | none       |
| SORT1     | 0.692  | 0.5329  | 4.3251 | 0.00163 | 0.014 | -1.03 | -1.3786 | none       |
| TNFRSF10, | 0.589  | 0.4913  | 4.3247 | 0.00163 | 0.014 | -1.03 | -1.3398 | none       |
| OPA3      | 0.685  | 0.6055  | 4.3246 | 0.00163 | 0.014 | -1.03 | -1.2805 | none       |
| STXBP3    | 0.608  | 0.4576  | 4.3234 | 0.00163 | 0.014 | -1.03 | -1.4744 | none       |
| MARCKSL1  | -0.485 | -0.3921 | -4.323 | 0.00163 | 0.014 | -1.03 | 2.08002 | none       |
| NDUFAF6   | 0.506  | 0.3548  | 4.3228 | 0.00163 | 0.014 | -1.03 | -0.7243 | none       |
| DSG3      | 0.364  | 0.2617  | 4.3227 | 0.00163 | 0.014 | -1.03 | -1.3104 | none       |
| DOK4      | 0.392  | 0.3344  | 4.3226 | 0.00163 | 0.014 | -1.03 | -0.9271 | none       |
| USF3      | 0.854  | 0.7395  | 4.32   | 0.00164 | 0.014 | -1.03 | -1.4686 | none       |
| KCTD5     | -0.566 | -0.3923 | -4.32  | 0.00164 | 0.014 | -1.03 | 1.70968 | none       |
| CAD       | 0.874  | 0.7661  | 4.319  | 0.00164 | 0.014 | -1.04 | -1.039  | none       |
| ST8SIA6   | 0.689  | 0.487   | 4.319  | 0.00164 | 0.014 | -1.04 | -0.9825 | none       |
| TIAF1     | 0.409  | 0.3792  | 4.3183 | 0.00165 | 0.014 | -1.04 | -1.2185 | none       |
| HPS4      | 0.625  | 0.4727  | 4.3176 | 0.00165 | 0.014 | -1.04 | -0.9872 | none       |
| C16ORF89  | 0.612  | 0.4358  | 4.3174 | 0.00165 | 0.014 | -1.04 | -1.401  | none       |
| CXORF38   | 0.648  | 0.5697  | 4.3174 | 0.00165 | 0.014 | -1.04 | -1.2466 | none       |
| SPON2     | 0.664  | 0.5035  | 4.3163 | 0.00165 | 0.014 | -1.04 | -0.7007 | none       |
| SEMA4B    | 0.813  | 0.6601  | 4.3161 | 0.00165 | 0.014 | -1.04 | -1.2047 | none       |
| C16ORF72  | 0.493  | 0.3858  | 4.3156 | 0.00165 | 0.014 | -1.04 | -1.6181 | OA-related |
| ZYG11A    | 0.69   | 0.5194  | 4.3154 | 0.00165 | 0.014 | -1.04 | -1.4285 | none       |
| OR2AG1    | 0.335  | 0.2467  | 4.3153 | 0.00165 | 0.014 | -1.04 | -1.3745 | none       |
| IKBKB     | 0.843  | 0.7568  | 4.3141 | 0.00166 | 0.014 | -1.04 | -1.4488 | none       |

|          |       |        |        |         |       |       |         |            |
|----------|-------|--------|--------|---------|-------|-------|---------|------------|
| RFFL     | 0.528 | 0.425  | 4.3139 | 0.00166 | 0.014 | -1.04 | -0.5877 | none       |
| SLC6A6   | 0.633 | 0.5714 | 4.3129 | 0.00166 | 0.014 | -1.05 | -0.2178 | none       |
| PTK6     | 0.384 | 0.255  | 4.3127 | 0.00166 | 0.014 | -1.05 | -1.3498 | none       |
| ASB8     | 0.357 | 0.2446 | 4.3122 | 0.00166 | 0.014 | -1.05 | -1.0017 | none       |
| DMBX1    | 0.542 | 0.3829 | 4.3109 | 0.00166 | 0.014 | -1.05 | -1.521  | none       |
| TBC1D17  | 0.673 | 0.5659 | 4.3101 | 0.00167 | 0.014 | -1.05 | -1.5045 | none       |
| DNAJC24  | 0.77  | 0.5949 | 4.309  | 0.00167 | 0.014 | -1.05 | -1.0679 | none       |
| BORCS8   | 0.687 | 0.516  | 4.3086 | 0.00167 | 0.014 | -1.05 | -0.9626 | none       |
| VPS37B   | 0.579 | 0.4391 | 4.3085 | 0.00167 | 0.014 | -1.05 | -1.3991 | none       |
| PKP2     | 0.63  | 0.4899 | 4.3083 | 0.00167 | 0.014 | -1.05 | -1.1975 | none       |
| CTSB     | 0.554 | 0.43   | 4.3083 | 0.00167 | 0.014 | -1.05 | -1.0669 | none       |
| ADSSL1   | 0.575 | 0.485  | 4.3069 | 0.00167 | 0.014 | -1.05 | -0.5559 | none       |
| TUBD1    | 0.724 | 0.5976 | 4.3036 | 0.00168 | 0.014 | -1.06 | -1.3499 | none       |
| CENPO    | 0.516 | 0.4152 | 4.3033 | 0.00168 | 0.014 | -1.06 | 0.10423 | none       |
| VPS33A   | 0.52  | 0.3853 | 4.3008 | 0.00169 | 0.014 | -1.06 | -1.3144 | none       |
| LYRM7    | 0.795 | 0.6345 | 4.3005 | 0.00169 | 0.014 | -1.06 | -0.905  | none       |
| LSM11    | 0.442 | 0.3418 | 4.3001 | 0.00169 | 0.014 | -1.06 | -1.6353 | OA-related |
| NATD1    | 0.543 | 0.443  | 4.2996 | 0.00169 | 0.014 | -1.07 | -1.5137 | none       |
| ESYT3    | 0.533 | 0.3946 | 4.2994 | 0.00169 | 0.014 | -1.07 | -1.3472 | none       |
| AFAP1    | 0.922 | 0.7898 | 4.299  | 0.0017  | 0.014 | -1.07 | -1.0893 | none       |
| FOXN3    | 0.994 | 0.8335 | 4.297  | 0.0017  | 0.014 | -1.07 | -1.3109 | none       |
| TBC1D20  | 0.472 | 0.3394 | 4.297  | 0.0017  | 0.014 | -1.07 | -1.1479 | none       |
| ZNF552   | 0.718 | 0.6359 | 4.2969 | 0.0017  | 0.014 | -1.07 | -1.0286 | none       |
| FANCA    | 0.483 | 0.4426 | 4.2965 | 0.0017  | 0.014 | -1.07 | -1.2808 | none       |
| CEP126   | 0.546 | 0.423  | 4.2955 | 0.0017  | 0.014 | -1.07 | -1.4301 | none       |
| ZSCAN10  | 0.949 | 0.7783 | 4.2952 | 0.00171 | 0.014 | -1.07 | -0.9448 | none       |
| TDRD3    | 0.811 | 0.6654 | 4.2946 | 0.00171 | 0.014 | -1.07 | -1.6056 | OA-related |
| ZNF273   | 0.678 | 0.5347 | 4.2946 | 0.00171 | 0.014 | -1.07 | -1.4213 | none       |
| TNFSF13  | 0.57  | 0.3801 | 4.2928 | 0.00171 | 0.014 | -1.08 | -0.3231 | none       |
| DDHD2    | 0.542 | 0.4035 | 4.2927 | 0.00171 | 0.014 | -1.08 | -0.3117 | none       |
| OR4F17   | 0.595 | 0.4419 | 4.2916 | 0.00171 | 0.014 | -1.08 | -1.0919 | none       |
| SGPL1    | 0.54  | 0.4294 | 4.2916 | 0.00171 | 0.014 | -1.08 | -1.4327 | none       |
| KPNA5    | 0.526 | 0.4402 | 4.2909 | 0.00172 | 0.014 | -1.08 | -0.8968 | none       |
| BSND     | 0.365 | 0.2581 | 4.2898 | 0.00172 | 0.014 | -1.08 | -1.4748 | none       |
| WDR92    | 0.468 | 0.3642 | 4.2896 | 0.00172 | 0.014 | -1.08 | -1.27   | none       |
| GRK7     | 0.495 | 0.3775 | 4.2893 | 0.00172 | 0.014 | -1.08 | -0.8889 | none       |
| KANSL1L  | 0.772 | 0.5446 | 4.2887 | 0.00172 | 0.014 | -1.08 | -1.4967 | none       |
| ANKRD30E | 0.532 | 0.4056 | 4.2868 | 0.00173 | 0.014 | -1.09 | -1.1599 | none       |
| AP4E1    | 0.662 | 0.5808 | 4.2867 | 0.00173 | 0.014 | -1.09 | -0.929  | none       |
| KLK7     | 0.417 | 0.3413 | 4.286  | 0.00173 | 0.014 | -1.09 | -0.3784 | none       |

|         |       |        |        |         |       |       |         |            |
|---------|-------|--------|--------|---------|-------|-------|---------|------------|
| FGF5    | 0.417 | 0.283  | 4.2856 | 0.00173 | 0.014 | -1.09 | -1.4474 | none       |
| HAUS5   | 0.492 | 0.433  | 4.2846 | 0.00173 | 0.014 | -1.09 | -1.363  | none       |
| ITFG2   | 0.529 | 0.4382 | 4.2843 | 0.00173 | 0.014 | -1.09 | -0.1522 | none       |
| KCNN2   | 0.688 | 0.57   | 4.2839 | 0.00173 | 0.014 | -1.09 | 0.0111  | none       |
| ZKSCAN1 | 0.973 | 0.8734 | 4.2837 | 0.00174 | 0.014 | -1.09 | -1.263  | none       |
| OR2V2   | 0.435 | 0.3025 | 4.2832 | 0.00174 | 0.014 | -1.09 | -1.243  | none       |
| OR6K3   | 0.577 | 0.4    | 4.2821 | 0.00174 | 0.014 | -1.09 | -1.565  | OA-related |
| MBTPS1  | 0.645 | 0.5628 | 4.2819 | 0.00174 | 0.014 | -1.09 | -1.3101 | none       |
| POU5F1  | 0.633 | 0.4837 | 4.2818 | 0.00174 | 0.014 | -1.09 | -1.3141 | none       |
| SOX7    | 0.406 | 0.3009 | 4.2806 | 0.00174 | 0.014 | -1.1  | -1.4824 | none       |
| ZCCHC4  | 0.51  | 0.3386 | 4.2797 | 0.00175 | 0.014 | -1.1  | -1.0924 | none       |
| ZGRF1   | 1.106 | 0.9572 | 4.2772 | 0.00175 | 0.014 | -1.1  | -1.37   | none       |
| DNAJC18 | 0.543 | 0.3389 | 4.2764 | 0.00176 | 0.014 | -1.1  | -1.0921 | none       |
| WDR55   | 0.494 | 0.3946 | 4.2747 | 0.00176 | 0.014 | -1.1  | -1.3991 | none       |
| NCCRP1  | 0.537 | 0.4127 | 4.2737 | 0.00176 | 0.014 | -1.11 | -1.3112 | none       |
| FAAH    | 0.754 | 0.6653 | 4.2721 | 0.00177 | 0.014 | -1.11 | -0.0774 | none       |
| PRKCA   | 1.012 | 0.9145 | 4.2701 | 0.00177 | 0.014 | -1.11 | -1.3523 | none       |
| KLHDC4  | 0.688 | 0.6742 | 4.2697 | 0.00177 | 0.014 | -1.11 | -1.1048 | none       |
| BPNT1   | 0.604 | 0.5115 | 4.2694 | 0.00177 | 0.014 | -1.11 | -0.7169 | none       |
| IL17RE  | 0.617 | 0.5068 | 4.269  | 0.00178 | 0.014 | -1.11 | -0.729  | none       |
| NOL11   | 0.594 | 0.4364 | 4.2685 | 0.00178 | 0.014 | -1.11 | -1.3891 | none       |
| BCAS1   | 0.505 | 0.3449 | 4.2685 | 0.00178 | 0.014 | -1.11 | -0.9021 | none       |
| INPP5B  | 1.006 | 0.9207 | 4.2685 | 0.00178 | 0.014 | -1.11 | -1.3373 | none       |
| ZNF391  | 0.48  | 0.3949 | 4.2662 | 0.00178 | 0.014 | -1.12 | -0.2355 | none       |
| SYMPK   | 1.179 | 1.0371 | 4.2644 | 0.00179 | 0.014 | -1.12 | -1.3012 | none       |
| MFAP5   | 0.515 | 0.4193 | 4.2638 | 0.00179 | 0.014 | -1.12 | -1.302  | none       |
| CHST1   | 0.445 | 0.3027 | 4.2637 | 0.00179 | 0.014 | -1.12 | -1.316  | none       |
| NRG1    | 0.695 | 0.496  | 4.2617 | 0.0018  | 0.014 | -1.12 | -1.3434 | none       |
| LILRB5  | 0.416 | 0.2886 | 4.2616 | 0.0018  | 0.014 | -1.12 | -1.3979 | none       |
| ATXN2   | 1.081 | 0.9904 | 4.26   | 0.0018  | 0.014 | -1.13 | -1.1058 | none       |
| SPRYD4  | 0.503 | 0.3377 | 4.2597 | 0.0018  | 0.014 | -1.13 | -1.3497 | none       |
| SNX27   | 0.806 | 0.664  | 4.2595 | 0.0018  | 0.014 | -1.13 | -1.5949 | OA-related |
| PCDHGA8 | 0.453 | 0.3325 | 4.2589 | 0.0018  | 0.014 | -1.13 | -1.2652 | none       |
| MCOLN1  | 0.579 | 0.4501 | 4.2584 | 0.0018  | 0.014 | -1.13 | -1.2382 | none       |
| EZH1    | 0.76  | 0.6856 | 4.2553 | 0.00181 | 0.015 | -1.13 | -1.3177 | none       |
| ZMYM6   | 0.782 | 0.6469 | 4.2549 | 0.00181 | 0.015 | -1.13 | -1.0579 | none       |
| QPCTL   | 0.769 | 0.6111 | 4.2544 | 0.00182 | 0.015 | -1.14 | -1.2253 | none       |
| CCDC150 | 0.815 | 0.6687 | 4.2543 | 0.00182 | 0.015 | -1.14 | -1.4656 | none       |
| NBPF12  | 0.681 | 0.6043 | 4.2535 | 0.00182 | 0.015 | -1.14 | -1.2196 | none       |
| RFX2    | 0.417 | 0.359  | 4.2522 | 0.00182 | 0.015 | -1.14 | -0.5434 | none       |



|          |       |         |        |         |       |       |         |            |
|----------|-------|---------|--------|---------|-------|-------|---------|------------|
| MS4A2    | 0.513 | 0.4062  | 4.2515 | 0.00182 | 0.015 | -1.14 | -1.1069 | none       |
| STMND1   | 0.879 | 0.7106  | 4.2512 | 0.00182 | 0.015 | -1.14 | -1.1552 | none       |
| MAPK10   | 0.664 | 0.5337  | 4.2507 | 0.00183 | 0.015 | -1.14 | -1.3391 | none       |
| NOL9     | 0.684 | 0.616   | 4.2481 | 0.00183 | 0.015 | -1.15 | -1.4277 | none       |
| RNF44    | 0.469 | 0.3899  | 4.2476 | 0.00183 | 0.015 | -1.15 | -1.3304 | none       |
| NSUN6    | 0.75  | 0.6088  | 4.2465 | 0.00184 | 0.015 | -1.15 | -1.204  | none       |
| NELL1    | 0.585 | 0.4848  | 4.2461 | 0.00184 | 0.015 | -1.15 | -1.3707 | none       |
| CTCF     | 0.491 | 0.3636  | 4.2456 | 0.00184 | 0.015 | -1.15 | -1.3975 | none       |
| ANKRD10  | 0.646 | 0.6279  | 4.2454 | 0.00184 | 0.015 | -1.15 | -1.149  | none       |
| PHLPP2   | 0.535 | 0.4438  | 4.2452 | 0.00184 | 0.015 | -1.15 | -1.4796 | none       |
| ZC3H12B  | 0.589 | 0.4325  | 4.2446 | 0.00184 | 0.015 | -1.15 | -1.5917 | OA-related |
| TNFRSF17 | 0.864 | 0.7284  | 4.2443 | 0.00184 | 0.015 | -1.15 | -0.5561 | none       |
| LRRIQ1   | 0.622 | 0.4408  | 4.2443 | 0.00184 | 0.015 | -1.15 | -1.463  | none       |
| RPAP3    | 0.945 | 0.7571  | 4.2414 | 0.00185 | 0.015 | -1.16 | -0.9308 | none       |
| DEPDC4   | 0.524 | 0.3629  | 4.2409 | 0.00185 | 0.015 | -1.16 | -1.3773 | none       |
| MYOZ3    | 0.613 | 0.4522  | 4.2394 | 0.00186 | 0.015 | -1.16 | -1.3616 | none       |
| LDHB     | -0.39 | -0.3259 | -4.239 | 0.00186 | 0.015 | -1.16 | 2.31012 | AA-related |
| IMPA2    | 0.683 | 0.5097  | 4.2386 | 0.00186 | 0.015 | -1.16 | -1.3501 | none       |
| PARP15   | 0.573 | 0.4366  | 4.2368 | 0.00187 | 0.015 | -1.16 | -1.5241 | none       |
| MPPE1    | 0.677 | 0.4903  | 4.2364 | 0.00187 | 0.015 | -1.16 | -1.1145 | none       |
| ADAT1    | 0.679 | 0.5511  | 4.2342 | 0.00187 | 0.015 | -1.17 | -1.0088 | none       |
| WWOX     | 0.493 | 0.4531  | 4.234  | 0.00187 | 0.015 | -1.17 | -0.1039 | none       |
| TRIM6    | 0.874 | 0.6481  | 4.2336 | 0.00187 | 0.015 | -1.17 | -1.0983 | none       |
| SLC25A34 | 0.623 | 0.4673  | 4.2331 | 0.00188 | 0.015 | -1.17 | -1.5056 | none       |
| OLAH     | 0.534 | 0.3296  | 4.2322 | 0.00188 | 0.015 | -1.17 | -1.2205 | none       |
| ZNF627   | 0.916 | 0.7085  | 4.2304 | 0.00188 | 0.015 | -1.17 | -1.5286 | none       |
| PIGA     | 0.631 | 0.3701  | 4.2296 | 0.00189 | 0.015 | -1.17 | -0.7923 | none       |
| OR10J1   | 0.574 | 0.4211  | 4.2285 | 0.00189 | 0.015 | -1.18 | -1.626  | OA-related |
| PON2     | 0.598 | 0.3962  | 4.2282 | 0.00189 | 0.015 | -1.18 | -0.9313 | none       |
| WDR97    | 0.383 | 0.2915  | 4.2273 | 0.00189 | 0.015 | -1.18 | -1.2774 | none       |
| NYAP2    | 0.419 | 0.3053  | 4.2264 | 0.0019  | 0.015 | -1.18 | -1.5313 | none       |
| MICALL1  | 0.681 | 0.6393  | 4.2252 | 0.0019  | 0.015 | -1.18 | -1.1781 | none       |
| OR10A2   | 0.468 | 0.349   | 4.2247 | 0.0019  | 0.015 | -1.18 | -1.4019 | none       |
| PFAS     | 0.813 | 0.7372  | 4.2236 | 0.0019  | 0.015 | -1.18 | -1.3485 | none       |
| TMEM116  | 0.665 | 0.4122  | 4.2229 | 0.00191 | 0.015 | -1.18 | -0.821  | none       |
| CCDC113  | 0.721 | 0.5859  | 4.2222 | 0.00191 | 0.015 | -1.19 | -1.1005 | none       |
| CD209    | 0.452 | 0.3084  | 4.2215 | 0.00191 | 0.015 | -1.19 | -1.117  | none       |
| TRIM7    | 0.436 | 0.3059  | 4.2199 | 0.00192 | 0.015 | -1.19 | -1.191  | none       |
| NAT10    | 0.691 | 0.6126  | 4.2184 | 0.00192 | 0.015 | -1.19 | -1.2801 | none       |
| RTTN     | 0.459 | 0.3626  | 4.2138 | 0.00193 | 0.015 | -1.2  | -1.2823 | none       |

|         |       |        |        |         |       |       |         |            |
|---------|-------|--------|--------|---------|-------|-------|---------|------------|
| CLN6    | 0.462 | 0.353  | 4.2121 | 0.00194 | 0.015 | -1.2  | -0.6074 | none       |
| ARSB    | 0.429 | 0.377  | 4.2119 | 0.00194 | 0.015 | -1.2  | -1.5503 | OA-related |
| TMCC3   | 0.916 | 0.7032 | 4.2114 | 0.00194 | 0.015 | -1.2  | -0.9608 | none       |
| ZC3H6   | 0.545 | 0.4381 | 4.211  | 0.00194 | 0.015 | -1.2  | -1.2762 | none       |
| GSS     | 0.506 | 0.3829 | 4.2103 | 0.00194 | 0.015 | -1.2  | -1.244  | none       |
| ACADL   | 0.581 | 0.4592 | 4.21   | 0.00194 | 0.015 | -1.2  | -1.5143 | none       |
| AKIRIN1 | 0.41  | 0.313  | 4.2098 | 0.00195 | 0.015 | -1.2  | 0.71305 | none       |
| SLC30A5 | 0.722 | 0.4768 | 4.2089 | 0.00195 | 0.015 | -1.21 | -1.1201 | none       |
| NBPF15  | 0.722 | 0.6728 | 4.206  | 0.00196 | 0.015 | -1.21 | -0.9146 | none       |
| SIN3A   | 1.006 | 0.7992 | 4.2047 | 0.00196 | 0.015 | -1.21 | -0.7985 | none       |
| TFRC    | 0.649 | 0.4953 | 4.2013 | 0.00197 | 0.015 | -1.22 | -1.4186 | none       |
| PLEKHM3 | 0.514 | 0.4463 | 4.2005 | 0.00197 | 0.015 | -1.22 | -1.4007 | none       |
| DGKD    | 0.647 | 0.5482 | 4.2003 | 0.00197 | 0.015 | -1.22 | -1.3468 | none       |
| HMG20A  | 0.732 | 0.5124 | 4.1957 | 0.00199 | 0.015 | -1.23 | -1.2012 | none       |
| TRAF5   | 0.454 | 0.391  | 4.1953 | 0.00199 | 0.015 | -1.23 | -0.4914 | none       |
| BCL2L15 | 0.59  | 0.3735 | 4.1952 | 0.00199 | 0.015 | -1.23 | -1.2494 | none       |
| NFAM1   | 0.496 | 0.3664 | 4.1946 | 0.00199 | 0.015 | -1.23 | -1.2083 | none       |
| SHPK    | 0.389 | 0.3174 | 4.1923 | 0.002   | 0.016 | -1.23 | -0.5754 | none       |
| NUSAP1  | 0.78  | 0.6738 | 4.1916 | 0.002   | 0.016 | -1.23 | -1.3969 | none       |
| SYP     | 0.485 | 0.3293 | 4.1916 | 0.002   | 0.016 | -1.23 | -1.3765 | none       |
| CAMK1   | 0.577 | 0.4233 | 4.1908 | 0.002   | 0.016 | -1.23 | -1.2319 | none       |
| EXD2    | 0.642 | 0.4464 | 4.1905 | 0.002   | 0.016 | -1.23 | -1.1149 | none       |
| ELMSAN1 | 0.856 | 0.772  | 4.1904 | 0.002   | 0.016 | -1.23 | -1.4041 | none       |
| FAM110D | 0.582 | 0.4375 | 4.1902 | 0.00201 | 0.016 | -1.24 | -1.3338 | none       |
| COL15A1 | 0.719 | 0.5597 | 4.1897 | 0.00201 | 0.016 | -1.24 | -0.9051 | none       |
| MTX3    | 0.565 | 0.448  | 4.189  | 0.00201 | 0.016 | -1.24 | -1.6195 | OA-related |
| MCM9    | 0.616 | 0.5753 | 4.1881 | 0.00201 | 0.016 | -1.24 | -0.4845 | none       |
| TRMT10B | 0.639 | 0.4762 | 4.1866 | 0.00202 | 0.016 | -1.24 | -1.3213 | none       |
| TDGF1   | 0.673 | 0.4701 | 4.1852 | 0.00202 | 0.016 | -1.24 | -1.3216 | none       |
| HELZ2   | 0.894 | 0.764  | 4.1847 | 0.00202 | 0.016 | -1.24 | -1.1149 | none       |
| PHGDH   | 0.688 | 0.5548 | 4.1845 | 0.00202 | 0.016 | -1.24 | -1.3175 | none       |
| EBPL    | 0.878 | 0.5975 | 4.1839 | 0.00203 | 0.016 | -1.24 | -0.9983 | none       |
| AUTS2   | 0.642 | 0.5048 | 4.1838 | 0.00203 | 0.016 | -1.24 | -1.4427 | none       |
| GSTO2   | 0.658 | 0.5208 | 4.1835 | 0.00203 | 0.016 | -1.25 | -1.4851 | none       |
| SIDT2   | 0.687 | 0.5376 | 4.1826 | 0.00203 | 0.016 | -1.25 | -1.4182 | none       |
| MIOX    | 0.5   | 0.3855 | 4.1825 | 0.00203 | 0.016 | -1.25 | -1.0021 | none       |
| DCTN5   | 0.497 | 0.3194 | 4.1813 | 0.00203 | 0.016 | -1.25 | -1.2691 | none       |
| PHACTR4 | 1.019 | 0.9454 | 4.1802 | 0.00204 | 0.016 | -1.25 | -1.4054 | none       |
| FRMD4A  | 0.827 | 0.7166 | 4.1798 | 0.00204 | 0.016 | -1.25 | -1.2884 | none       |
| SLC29A2 | 0.354 | 0.3087 | 4.1797 | 0.00204 | 0.016 | -1.25 | -0.1362 | none       |

|          |        |         |        |         |       |       |         |            |
|----------|--------|---------|--------|---------|-------|-------|---------|------------|
| ARL10    | 0.571  | 0.5075  | 4.1795 | 0.00204 | 0.016 | -1.25 | -1.4995 | none       |
| SLC7A6   | 0.569  | 0.4193  | 4.1795 | 0.00204 | 0.016 | -1.25 | -1.2794 | none       |
| LAMB1    | 0.652  | 0.593   | 4.1785 | 0.00204 | 0.016 | -1.25 | -0.7913 | none       |
| CFHR2    | 0.586  | 0.4406  | 4.1782 | 0.00204 | 0.016 | -1.25 | -1.3486 | none       |
| KIAA0895 | 0.569  | 0.3524  | 4.1775 | 0.00205 | 0.016 | -1.25 | -0.8264 | none       |
| ZNF26    | 0.586  | 0.5046  | 4.1769 | 0.00205 | 0.016 | -1.26 | -1.0285 | none       |
| SGK2     | 0.75   | 0.5852  | 4.1753 | 0.00205 | 0.016 | -1.26 | -0.8559 | none       |
| MICAL2   | 0.671  | 0.5886  | 4.1738 | 0.00206 | 0.016 | -1.26 | -1.2877 | none       |
| ARRB1    | 0.629  | 0.4588  | 4.1735 | 0.00206 | 0.016 | -1.26 | -1.4421 | none       |
| LIN9     | -0.473 | -0.3949 | -4.173 | 0.00206 | 0.016 | -1.26 | 2.61752 | AA-related |
| GID4     | 0.648  | 0.4681  | 4.1713 | 0.00207 | 0.016 | -1.26 | -1.1722 | none       |
| RPRD1B   | 0.792  | 0.5884  | 4.1695 | 0.00207 | 0.016 | -1.27 | -0.9473 | none       |
| DYRK3    | 0.423  | 0.3369  | 4.1679 | 0.00208 | 0.016 | -1.27 | -1.17   | none       |
| DRC3     | 1.178  | 1.0512  | 4.1674 | 0.00208 | 0.016 | -1.27 | -0.9742 | none       |
| SGPP2    | 0.419  | 0.3612  | 4.1666 | 0.00208 | 0.016 | -1.27 | -1.1778 | none       |
| ZKSCAN4  | 0.386  | 0.2796  | 4.165  | 0.00209 | 0.016 | -1.27 | -0.8611 | none       |
| FEM1A    | 0.734  | 0.6384  | 4.1648 | 0.00209 | 0.016 | -1.27 | -1.2268 | none       |
| VWA5B1   | 0.59   | 0.4346  | 4.1643 | 0.00209 | 0.016 | -1.28 | -1.2627 | none       |
| FAM161B  | 0.548  | 0.4258  | 4.1639 | 0.00209 | 0.016 | -1.28 | -1.483  | none       |
| C17ORF99 | 0.743  | 0.5385  | 4.1636 | 0.00209 | 0.016 | -1.28 | -0.7287 | none       |
| TLL7     | 0.615  | 0.3607  | 4.1621 | 0.0021  | 0.016 | -1.28 | -1.0054 | none       |
| PLD6     | 0.63   | 0.5032  | 4.1608 | 0.0021  | 0.016 | -1.28 | -1.1268 | none       |
| TTC22    | 0.519  | 0.439   | 4.1599 | 0.0021  | 0.016 | -1.28 | -0.5319 | none       |
| ZNF808   | 0.924  | 0.7999  | 4.1598 | 0.0021  | 0.016 | -1.28 | -1.4802 | none       |
| TMEM108  | 0.433  | 0.3132  | 4.1583 | 0.00211 | 0.016 | -1.28 | -1.4601 | none       |
| PPP1R3G  | 0.369  | 0.2972  | 4.1572 | 0.00211 | 0.016 | -1.29 | -1.1548 | none       |
| ITIH1    | 1.069  | 0.8489  | 4.1569 | 0.00211 | 0.016 | -1.29 | -1.0152 | none       |
| ZNF117   | 0.498  | 0.3819  | 4.1568 | 0.00211 | 0.016 | -1.29 | -1.3834 | none       |
| C1ORF122 | -0.692 | -0.5093 | -4.154 | 0.00212 | 0.016 | -1.29 | 2.14833 | AA-related |
| OTUD6A   | 0.694  | 0.5254  | 4.1521 | 0.00213 | 0.016 | -1.29 | -1.2861 | none       |
| SLC47A2  | 0.527  | 0.3726  | 4.1517 | 0.00213 | 0.016 | -1.3  | -1.2256 | none       |
| HDAC9    | 0.855  | 0.7055  | 4.1496 | 0.00214 | 0.016 | -1.3  | -0.836  | none       |
| COLEC12  | 0.762  | 0.5673  | 4.1494 | 0.00214 | 0.016 | -1.3  | -1.2549 | none       |
| STRN3    | 0.922  | 0.7727  | 4.1486 | 0.00214 | 0.016 | -1.3  | -1.415  | none       |
| NPHP3    | 0.832  | 0.7917  | 4.1473 | 0.00214 | 0.016 | -1.3  | -1.0518 | none       |
| ALG14    | 0.74   | 0.57    | 4.1466 | 0.00215 | 0.016 | -1.3  | -0.5459 | none       |
| SLCO1A2  | 0.671  | 0.4637  | 4.1462 | 0.00215 | 0.016 | -1.3  | -1.1275 | none       |
| ZNF445   | 0.63   | 0.537   | 4.1447 | 0.00215 | 0.016 | -1.31 | -1.4713 | none       |
| ACAD10   | 0.855  | 0.7153  | 4.1444 | 0.00215 | 0.016 | -1.31 | -1.1283 | none       |
| TMEM169  | 0.314  | 0.137   | 4.1435 | 0.00216 | 0.016 | -1.31 | 0.04085 | none       |

|          |       |        |        |         |       |       |         |            |
|----------|-------|--------|--------|---------|-------|-------|---------|------------|
| RAB3B    | 0.386 | 0.2725 | 4.1396 | 0.00217 | 0.016 | -1.31 | -1.5992 | OA-related |
| FLYWCH1  | 0.724 | 0.5856 | 4.1385 | 0.00217 | 0.016 | -1.32 | -1.5733 | OA-related |
| LDB3     | 0.582 | 0.4508 | 4.1382 | 0.00217 | 0.016 | -1.32 | -1.1742 | none       |
| PLEKHH3  | 0.489 | 0.3088 | 4.1365 | 0.00218 | 0.016 | -1.32 | -1.1871 | none       |
| BTN3A1   | 0.631 | 0.5418 | 4.1362 | 0.00218 | 0.016 | -1.32 | -0.9962 | none       |
| SLC25A41 | 0.558 | 0.423  | 4.1356 | 0.00218 | 0.016 | -1.32 | -1.11   | none       |
| HYLS1    | 0.492 | 0.3584 | 4.1338 | 0.00219 | 0.016 | -1.32 | -0.7651 | none       |
| SYNPO2L  | 0.527 | 0.4027 | 4.1321 | 0.0022  | 0.017 | -1.33 | -1.2704 | none       |
| KLK11    | 0.613 | 0.4654 | 4.1309 | 0.0022  | 0.017 | -1.33 | -0.5542 | none       |
| ALDH2    | 0.587 | 0.4136 | 4.1308 | 0.0022  | 0.017 | -1.33 | -1.5232 | none       |
| GNG4     | 0.564 | 0.4482 | 4.1305 | 0.0022  | 0.017 | -1.33 | -1.2373 | none       |
| LZTFL1   | 0.658 | 0.4639 | 4.1298 | 0.0022  | 0.017 | -1.33 | -0.8686 | none       |
| ZNF493   | 0.715 | 0.594  | 4.1294 | 0.0022  | 0.017 | -1.33 | -1.195  | none       |
| LARS2    | 0.842 | 0.7539 | 4.1294 | 0.0022  | 0.017 | -1.33 | -0.8157 | none       |
| LRRC37B  | 0.793 | 0.6987 | 4.1282 | 0.00221 | 0.017 | -1.33 | -1.2086 | none       |
| SENP1    | 0.553 | 0.4428 | 4.1267 | 0.00221 | 0.017 | -1.33 | -1.0336 | none       |
| DEGS1    | 0.414 | 0.264  | 4.1259 | 0.00222 | 0.017 | -1.34 | -0.2188 | none       |
| ASB16    | 0.473 | 0.4158 | 4.1258 | 0.00222 | 0.017 | -1.34 | -0.6893 | none       |
| ANKRD45  | 0.74  | 0.5562 | 4.1256 | 0.00222 | 0.017 | -1.34 | -1.5698 | OA-related |
| ZNF584   | 0.632 | 0.4888 | 4.1254 | 0.00222 | 0.017 | -1.34 | -1.3237 | none       |
| MKRN1    | 0.712 | 0.5214 | 4.1254 | 0.00222 | 0.017 | -1.34 | -1.3612 | none       |
| CYB5RL   | 0.646 | 0.5164 | 4.1253 | 0.00222 | 0.017 | -1.34 | -1.3666 | none       |
| RNFT2    | 0.484 | 0.3595 | 4.1245 | 0.00222 | 0.017 | -1.34 | -1.3443 | none       |
| SMUG1    | 0.771 | 0.5165 | 4.1235 | 0.00222 | 0.017 | -1.34 | -1.2316 | none       |
| RAB3D    | 0.425 | 0.2794 | 4.1232 | 0.00223 | 0.017 | -1.34 | -1.4484 | none       |
| BICDL2   | 0.403 | 0.3071 | 4.1226 | 0.00223 | 0.017 | -1.34 | -0.9282 | none       |
| TMEM170  | 0.369 | 0.2439 | 4.1224 | 0.00223 | 0.017 | -1.34 | -0.8024 | none       |
| TNS2     | 0.78  | 0.6288 | 4.1214 | 0.00223 | 0.017 | -1.34 | -1.0613 | none       |
| SIM2     | 0.679 | 0.4822 | 4.1204 | 0.00224 | 0.017 | -1.34 | -1.1264 | none       |
| NRIP3    | 0.59  | 0.4804 | 4.1202 | 0.00224 | 0.017 | -1.34 | -1.1111 | none       |
| PLD1     | 0.844 | 0.733  | 4.119  | 0.00224 | 0.017 | -1.35 | -0.9328 | none       |
| SENP8    | 0.492 | 0.3277 | 4.117  | 0.00225 | 0.017 | -1.35 | -0.954  | none       |
| BICDL1   | 0.917 | 0.8473 | 4.1168 | 0.00225 | 0.017 | -1.35 | -1.3983 | none       |
| ZNF550   | 0.637 | 0.6137 | 4.1145 | 0.00226 | 0.017 | -1.35 | -0.6518 | none       |
| ZNF589   | 0.82  | 0.7683 | 4.1119 | 0.00227 | 0.017 | -1.36 | -0.8963 | none       |
| DNAJC5B  | 0.572 | 0.4308 | 4.1118 | 0.00227 | 0.017 | -1.36 | -1.2319 | none       |
| OR6C75   | 0.64  | 0.4538 | 4.1115 | 0.00227 | 0.017 | -1.36 | -1.4302 | none       |
| GTF2H3   | 0.509 | 0.3276 | 4.1086 | 0.00228 | 0.017 | -1.36 | -0.6309 | none       |
| ACADVL   | 0.447 | 0.4829 | 4.1079 | 0.00228 | 0.017 | -1.36 | 0.95719 | none       |
| SIPA1    | 0.827 | 0.7739 | 4.1072 | 0.00228 | 0.017 | -1.36 | -1.1294 | none       |

|           |        |         |        |         |       |       |         |      |
|-----------|--------|---------|--------|---------|-------|-------|---------|------|
| DNAL1     | 0.578  | 0.4434  | 4.1049 | 0.00229 | 0.017 | -1.37 | -1.2422 | none |
| SHCBP1L   | 0.737  | 0.5757  | 4.1034 | 0.0023  | 0.017 | -1.37 | -0.7725 | none |
| UBA7      | 0.433  | 0.3796  | 4.1025 | 0.0023  | 0.017 | -1.37 | -0.4962 | none |
| RPS6KA5   | 0.618  | 0.4856  | 4.1023 | 0.0023  | 0.017 | -1.37 | -1.4375 | none |
| LYRM4     | 0.565  | 0.3193  | 4.1004 | 0.00231 | 0.017 | -1.38 | -1.0806 | none |
| GCC1      | 0.97   | 0.8347  | 4.0993 | 0.00231 | 0.017 | -1.38 | -1.1532 | none |
| GIN54     | 0.874  | 0.7122  | 4.0986 | 0.00231 | 0.017 | -1.38 | -1.2552 | none |
| POLR2J2   | 0.623  | 0.487   | 4.0983 | 0.00231 | 0.017 | -1.38 | -1.1566 | none |
| ATG2A     | 0.702  | 0.6532  | 4.0972 | 0.00232 | 0.017 | -1.38 | -0.8216 | none |
| C6ORF163  | 0.514  | 0.3942  | 4.0969 | 0.00232 | 0.017 | -1.38 | -0.6594 | none |
| DHCR24    | 0.466  | 0.4481  | 4.0952 | 0.00233 | 0.017 | -1.38 | 0.10868 | none |
| ATXN1     | 0.489  | 0.3389  | 4.0948 | 0.00233 | 0.017 | -1.38 | -1.4672 | none |
| MROH7     | 0.859  | 0.6431  | 4.0948 | 0.00233 | 0.017 | -1.38 | -1.1523 | none |
| TMEM181   | 0.488  | 0.3904  | 4.0942 | 0.00233 | 0.017 | -1.38 | -1.1653 | none |
| KCNB1     | 0.665  | 0.5447  | 4.0941 | 0.00233 | 0.017 | -1.39 | -1.304  | none |
| BMPER     | 0.687  | 0.4852  | 4.0932 | 0.00233 | 0.017 | -1.39 | -0.9048 | none |
| PRAP1     | 0.645  | 0.4516  | 4.0925 | 0.00234 | 0.017 | -1.39 | -1.376  | none |
| PTGIR     | 0.516  | 0.4368  | 4.0924 | 0.00234 | 0.017 | -1.39 | -1.1696 | none |
| PCYT1B    | 0.387  | 0.2481  | 4.0923 | 0.00234 | 0.017 | -1.39 | -1.3435 | none |
| NPIP4     | 1.175  | 1.0689  | 4.0921 | 0.00234 | 0.017 | -1.39 | -1.1832 | none |
| ATP6V0D2  | 0.871  | 0.7337  | 4.0915 | 0.00234 | 0.017 | -1.39 | -0.9713 | none |
| RUNDC1    | 0.685  | 0.571   | 4.0914 | 0.00234 | 0.017 | -1.39 | -1.507  | none |
| SPECC1L-A | 0.528  | 0.4261  | 4.0913 | 0.00234 | 0.017 | -1.39 | -0.5122 | none |
| MCF2L2    | 0.58   | 0.471   | 4.0905 | 0.00234 | 0.017 | -1.39 | -0.9033 | none |
| GPAT3     | -0.501 | -0.3865 | -4.09  | 0.00234 | 0.017 | -1.39 | 1.92547 | none |
| ARL5C     | 0.96   | 0.7566  | 4.09   | 0.00234 | 0.017 | -1.39 | -0.9406 | none |
| KCNH1     | 0.606  | 0.4046  | 4.09   | 0.00234 | 0.017 | -1.39 | -1.378  | none |
| TMEM182   | 0.657  | 0.5147  | 4.089  | 0.00235 | 0.017 | -1.39 | -0.7098 | none |
| BTBD7     | 0.706  | 0.5671  | 4.088  | 0.00235 | 0.017 | -1.39 | -1.2718 | none |
| FAM98C    | 0.976  | 0.7833  | 4.0871 | 0.00236 | 0.017 | -1.4  | -0.8992 | none |
| FKBP14    | 0.628  | 0.5834  | 4.0864 | 0.00236 | 0.017 | -1.4  | -1.1544 | none |
| DNAH9     | 0.626  | 0.4389  | 4.0859 | 0.00236 | 0.017 | -1.4  | -0.6148 | none |
| PNPLA1    | 0.47   | 0.3596  | 4.0855 | 0.00236 | 0.017 | -1.4  | -1.1332 | none |
| IRGM      | 0.474  | 0.3884  | 4.0851 | 0.00236 | 0.017 | -1.4  | -1.1869 | none |
| CCDC88C   | 0.528  | 0.4497  | 4.0848 | 0.00236 | 0.017 | -1.4  | -1.2932 | none |
| CFTR      | 1.111  | 0.8367  | 4.0836 | 0.00237 | 0.017 | -1.4  | -0.6858 | none |
| SEC31A    | 0.647  | 0.5282  | 4.0835 | 0.00237 | 0.017 | -1.4  | -1.472  | none |
| OR4P4     | 0.478  | 0.3661  | 4.0817 | 0.00238 | 0.017 | -1.4  | -1.0228 | none |
| NAPB      | 0.469  | 0.3142  | 4.081  | 0.00238 | 0.017 | -1.41 | 0.13869 | none |
| ITGAD     | 0.736  | 0.5122  | 4.0798 | 0.00238 | 0.017 | -1.41 | -1.1332 | none |

|          |        |        |        |         |       |       |         |            |
|----------|--------|--------|--------|---------|-------|-------|---------|------------|
| HSPBAP1  | 0.462  | 0.3808 | 4.0798 | 0.00238 | 0.017 | -1.41 | -1.0149 | none       |
| HSD17B1  | 0.495  | 0.4478 | 4.0781 | 0.00239 | 0.017 | -1.41 | -0.2404 | none       |
| ATF7     | 0.637  | 0.4781 | 4.0781 | 0.00239 | 0.017 | -1.41 | -1.4165 | none       |
| XPO5     | 0.531  | 0.4646 | 4.0778 | 0.00239 | 0.017 | -1.41 | -1.2212 | none       |
| C22ORF39 | 0.364  | 0.295  | 4.0765 | 0.00239 | 0.017 | -1.41 | -0.149  | none       |
| PAX8     | 0.667  | 0.5535 | 4.0747 | 0.0024  | 0.017 | -1.42 | -0.4725 | none       |
| ZMYM1    | 0.768  | 0.6445 | 4.0741 | 0.0024  | 0.017 | -1.42 | -0.9251 | none       |
| SLC14A2  | 0.32   | 0.2352 | 4.0718 | 0.00241 | 0.018 | -1.42 | -1.4999 | none       |
| NCMAP    | 0.504  | 0.3513 | 4.0709 | 0.00242 | 0.018 | -1.42 | -1.45   | none       |
| CHRA1    | 0.416  | 0.2844 | 4.0694 | 0.00242 | 0.018 | -1.42 | -0.7989 | none       |
| ACADSB   | 0.548  | 0.4126 | 4.0682 | 0.00243 | 0.018 | -1.43 | -0.4381 | none       |
| MTMR12   | 0.401  | 0.3202 | 4.0673 | 0.00243 | 0.018 | -1.43 | -0.5898 | none       |
| RASGRP4  | 0.711  | 0.6114 | 4.066  | 0.00243 | 0.018 | -1.43 | -1.2334 | none       |
| FAM161A  | 0.582  | 0.5186 | 4.0648 | 0.00244 | 0.018 | -1.43 | -1.1875 | none       |
| L3MBTL2  | 0.615  | 0.5194 | 4.0646 | 0.00244 | 0.018 | -1.43 | -1.1699 | none       |
| HIVEP2   | 1.174  | 1.1145 | 4.0644 | 0.00244 | 0.018 | -1.43 | -1.2957 | none       |
| IQSEC2   | 0.66   | 0.525  | 4.063  | 0.00245 | 0.018 | -1.43 | -0.8781 | none       |
| FSIP2    | 0.372  | 0.2977 | 4.0618 | 0.00245 | 0.018 | -1.44 | -0.975  | none       |
| DECR2    | 0.637  | 0.4332 | 4.059  | 0.00246 | 0.018 | -1.44 | -0.9697 | none       |
| RASL10A  | -0.467 | -0.328 | -4.056 | 0.00247 | 0.018 | -1.44 | 0.87494 | none       |
| FOXJ2    | 0.663  | 0.571  | 4.0555 | 0.00247 | 0.018 | -1.45 | -1.481  | none       |
| PITPNM2  | 0.628  | 0.5423 | 4.0551 | 0.00248 | 0.018 | -1.45 | -1.2024 | none       |
| CNDP1    | 0.957  | 0.8203 | 4.0551 | 0.00248 | 0.018 | -1.45 | -0.97   | none       |
| CCDC163  | 0.622  | 0.4186 | 4.0546 | 0.00248 | 0.018 | -1.45 | -1.108  | none       |
| NRIP2    | 0.636  | 0.4676 | 4.054  | 0.00248 | 0.018 | -1.45 | -1.194  | none       |
| SLC35E4  | 0.353  | 0.2759 | 4.0538 | 0.00248 | 0.018 | -1.45 | -0.5296 | none       |
| COL28A1  | 0.66   | 0.4937 | 4.0519 | 0.00249 | 0.018 | -1.45 | -0.2794 | none       |
| FAM129A  | 1.172  | 1.054  | 4.0517 | 0.00249 | 0.018 | -1.45 | -1.355  | none       |
| C9ORF3   | 0.436  | 0.328  | 4.0504 | 0.00249 | 0.018 | -1.45 | -1.0935 | none       |
| MELK     | 0.522  | 0.3596 | 4.0501 | 0.0025  | 0.018 | -1.45 | -1.2785 | none       |
| ZNRF1    | 0.87   | 0.6524 | 4.0501 | 0.0025  | 0.018 | -1.45 | -1.3278 | none       |
| RNF103   | 0.415  | 0.2845 | 4.0493 | 0.0025  | 0.018 | -1.46 | -0.7878 | none       |
| GTF2IRD1 | 0.62   | 0.4639 | 4.0479 | 0.0025  | 0.018 | -1.46 | -1.3235 | none       |
| SLC16A12 | 0.723  | 0.5196 | 4.0476 | 0.00251 | 0.018 | -1.46 | -1.4727 | none       |
| ATPAF2   | 0.483  | 0.3777 | 4.0472 | 0.00251 | 0.018 | -1.46 | -1.1756 | none       |
| HBP1     | 0.508  | 0.3089 | 4.046  | 0.00251 | 0.018 | -1.46 | -0.7362 | none       |
| L1TD1    | 0.372  | 0.2796 | 4.0451 | 0.00252 | 0.018 | -1.46 | -1.5689 | OA-related |
| CASC3    | 0.709  | 0.6454 | 4.0449 | 0.00252 | 0.018 | -1.46 | -1.2838 | none       |
| MTHFD1   | 0.76   | 0.6584 | 4.0422 | 0.00253 | 0.018 | -1.47 | -0.9694 | none       |
| NUB1     | 0.671  | 0.5083 | 4.0419 | 0.00253 | 0.018 | -1.47 | -1.3721 | none       |

|           |       |        |        |         |       |       |         |      |
|-----------|-------|--------|--------|---------|-------|-------|---------|------|
| LIX1      | 0.356 | 0.2595 | 4.0416 | 0.00253 | 0.018 | -1.47 | -0.8244 | none |
| RPH3A     | 0.656 | 0.5838 | 4.041  | 0.00253 | 0.018 | -1.47 | -1.052  | none |
| KLHL2     | 0.678 | 0.4895 | 4.0397 | 0.00254 | 0.018 | -1.47 | -1.2642 | none |
| DACH2     | 0.448 | 0.3436 | 4.0376 | 0.00255 | 0.018 | -1.47 | -1.5283 | none |
| CFAP69    | 0.543 | 0.4345 | 4.0374 | 0.00255 | 0.018 | -1.47 | -1.2465 | none |
| SRGAP1    | 0.428 | 0.2854 | 4.0366 | 0.00255 | 0.018 | -1.48 | -1.2678 | none |
| FRMD8     | 0.422 | 0.3124 | 4.0364 | 0.00255 | 0.018 | -1.48 | 0.03394 | none |
| CPT1A     | 0.829 | 0.8463 | 4.0364 | 0.00255 | 0.018 | -1.48 | -1.0394 | none |
| SLC9A7    | 0.458 | 0.3628 | 4.0356 | 0.00255 | 0.018 | -1.48 | -1.0238 | none |
| RBP7      | 0.675 | 0.5146 | 4.0336 | 0.00256 | 0.018 | -1.48 | -1.2369 | none |
| PLPP3     | 0.461 | 0.333  | 4.0328 | 0.00256 | 0.018 | -1.48 | -0.9746 | none |
| KCNRG     | 0.53  | 0.4773 | 4.0325 | 0.00257 | 0.018 | -1.48 | -0.8662 | none |
| ARNTL2    | 0.542 | 0.4706 | 4.0324 | 0.00257 | 0.018 | -1.48 | -1.2249 | none |
| CEP170    | 1.067 | 1.025  | 4.0324 | 0.00257 | 0.018 | -1.48 | -0.8846 | none |
| XKR6      | 0.579 | 0.4369 | 4.0322 | 0.00257 | 0.018 | -1.48 | -0.5378 | none |
| GAPVD1    | 0.975 | 0.8505 | 4.0317 | 0.00257 | 0.018 | -1.48 | -1.0299 | none |
| LRRC69    | 0.961 | 0.7149 | 4.0299 | 0.00258 | 0.018 | -1.49 | -1.2092 | none |
| SLC25A37  | 0.444 | 0.335  | 4.0289 | 0.00258 | 0.018 | -1.49 | -1.3044 | none |
| XAF1      | 0.529 | 0.4881 | 4.0287 | 0.00258 | 0.018 | -1.49 | -0.6568 | none |
| TBCK      | 0.414 | 0.304  | 4.0285 | 0.00258 | 0.018 | -1.49 | -0.9563 | none |
| FERMT2    | 0.521 | 0.4233 | 4.0284 | 0.00258 | 0.018 | -1.49 | -1.3814 | none |
| PRR16     | 0.414 | 0.2803 | 4.0277 | 0.00259 | 0.018 | -1.49 | -1.2497 | none |
| SULT2B1   | 0.536 | 0.4263 | 4.0256 | 0.00259 | 0.018 | -1.49 | -1.1178 | none |
| PRDM7     | 0.674 | 0.5367 | 4.0256 | 0.00259 | 0.018 | -1.49 | -1.06   | none |
| CATSPERD  | 0.47  | 0.3822 | 4.0249 | 0.0026  | 0.018 | -1.49 | -0.7721 | none |
| DDX19A    | 0.906 | 0.8619 | 4.0241 | 0.0026  | 0.018 | -1.5  | -1.0405 | none |
| CLIP1     | 1.125 | 1.0947 | 4.0235 | 0.0026  | 0.018 | -1.5  | -1.1731 | none |
| PRND      | 0.539 | 0.3947 | 4.022  | 0.00261 | 0.018 | -1.5  | -1.3276 | none |
| LMNTD1    | 0.831 | 0.6257 | 4.0219 | 0.00261 | 0.018 | -1.5  | -1.0455 | none |
| PNPT1     | 0.583 | 0.4847 | 4.0217 | 0.00261 | 0.018 | -1.5  | -0.9214 | none |
| TNFAIP8L1 | 0.61  | 0.5434 | 4.0214 | 0.00261 | 0.018 | -1.5  | -1.3843 | none |
| PLEKHM1   | 0.702 | 0.5482 | 4.0199 | 0.00262 | 0.019 | -1.5  | -0.9638 | none |
| XAGE5     | 0.562 | 0.4465 | 4.0194 | 0.00262 | 0.019 | -1.5  | -1.328  | none |
| INTS4     | 0.524 | 0.3995 | 4.0188 | 0.00262 | 0.019 | -1.5  | -1.2267 | none |
| UNC79     | 0.389 | 0.2709 | 4.0181 | 0.00262 | 0.019 | -1.5  | -1.3364 | none |
| MIA2      | 0.801 | 0.6571 | 4.0181 | 0.00262 | 0.019 | -1.5  | -1.3109 | none |
| NIPSNAP1  | 0.473 | 0.37   | 4.0169 | 0.00263 | 0.019 | -1.51 | -1.2455 | none |
| SLCO2A1   | 0.342 | 0.2848 | 4.0168 | 0.00263 | 0.019 | -1.51 | -1.4692 | none |
| FGF11     | 0.574 | 0.4331 | 4.0162 | 0.00263 | 0.019 | -1.51 | -1.4022 | none |
| NUP88     | 0.509 | 0.324  | 4.0152 | 0.00264 | 0.019 | -1.51 | -1.322  | none |

|         |       |         |        |         |       |       |         |            |
|---------|-------|---------|--------|---------|-------|-------|---------|------------|
| RAF1    | 0.457 | 0.3858  | 4.0143 | 0.00264 | 0.019 | -1.51 | -0.6929 | none       |
| POLG2   | 0.616 | 0.4887  | 4.0134 | 0.00264 | 0.019 | -1.51 | -1.1974 | none       |
| MRI1    | 0.634 | 0.535   | 4.013  | 0.00265 | 0.019 | -1.51 | -0.5573 | none       |
| SCN9A   | 0.392 | 0.2715  | 4.0122 | 0.00265 | 0.019 | -1.51 | -1.3823 | none       |
| FKTN    | 0.638 | 0.44    | 4.0048 | 0.00268 | 0.019 | -1.53 | -0.2744 | none       |
| ODF2L   | 0.423 | 0.2573  | 4.0037 | 0.00269 | 0.019 | -1.53 | -1.2459 | none       |
| PDP2    | 0.762 | 0.6344  | 4.0005 | 0.0027  | 0.019 | -1.53 | -0.4195 | none       |
| SNRNP35 | 0.652 | 0.5113  | 3.9991 | 0.0027  | 0.019 | -1.53 | -1.3883 | none       |
| SULT1C4 | 0.493 | 0.3941  | 3.9991 | 0.0027  | 0.019 | -1.53 | -1.4606 | none       |
| ANXA4   | 0.453 | 0.3327  | 3.9976 | 0.00271 | 0.019 | -1.54 | -0.0791 | none       |
| RASSF9  | 0.525 | 0.3673  | 3.9973 | 0.00271 | 0.019 | -1.54 | -1.3915 | none       |
| ADGRF1  | 0.558 | 0.4302  | 3.9967 | 0.00272 | 0.019 | -1.54 | -1.47   | none       |
| ARPC3   | -0.45 | -0.4154 | -3.996 | 0.00272 | 0.019 | -1.54 | 2.12672 | AA-related |
| AZIN2   | 0.534 | 0.4015  | 3.9954 | 0.00272 | 0.019 | -1.54 | -0.89   | none       |
| MOV10L1 | 0.584 | 0.4423  | 3.9945 | 0.00272 | 0.019 | -1.54 | -1.5099 | none       |
| DCC     | 1.004 | 0.8201  | 3.9938 | 0.00273 | 0.019 | -1.54 | -1.0399 | none       |
| FAM216A | 0.423 | 0.3144  | 3.992  | 0.00274 | 0.019 | -1.55 | -1.0998 | none       |
| GIPC1   | 0.696 | 0.5165  | 3.9918 | 0.00274 | 0.019 | -1.55 | -0.8392 | none       |
| NLRC5   | 0.756 | 0.6649  | 3.9915 | 0.00274 | 0.019 | -1.55 | -1.4257 | none       |
| CCL15   | 0.777 | 0.6507  | 3.9911 | 0.00274 | 0.019 | -1.55 | -0.5215 | none       |
| POGZ    | 0.836 | 0.7178  | 3.99   | 0.00274 | 0.019 | -1.55 | -1.1856 | none       |
| SCFD1   | 0.494 | 0.3175  | 3.9898 | 0.00274 | 0.019 | -1.55 | -1.2351 | none       |
| RUFY4   | 0.608 | 0.4883  | 3.9884 | 0.00275 | 0.019 | -1.55 | -0.3688 | none       |
| RBM48   | 0.421 | 0.3565  | 3.9864 | 0.00276 | 0.019 | -1.55 | -1.1686 | none       |
| ARID1A  | 1.108 | 1.0597  | 3.9861 | 0.00276 | 0.019 | -1.56 | -1.185  | none       |
| DLK2    | 0.57  | 0.4131  | 3.986  | 0.00276 | 0.019 | -1.56 | -1.1985 | none       |
| FBXL12  | 0.555 | 0.4338  | 3.9858 | 0.00276 | 0.019 | -1.56 | -1.2874 | none       |
| FNTA    | 0.567 | 0.3846  | 3.9844 | 0.00277 | 0.019 | -1.56 | -1.139  | none       |
| ZNF568  | 0.659 | 0.4825  | 3.9837 | 0.00277 | 0.019 | -1.56 | -1.6447 | OA-related |
| SRRD    | 0.728 | 0.5494  | 3.9835 | 0.00277 | 0.019 | -1.56 | -1.244  | none       |
| NUBPL   | 0.636 | 0.4644  | 3.9832 | 0.00277 | 0.019 | -1.56 | -1.1128 | none       |
| CREG1   | 0.46  | 0.3857  | 3.9831 | 0.00277 | 0.019 | -1.56 | 0.89919 | none       |
| MAML1   | 0.804 | 0.7669  | 3.982  | 0.00278 | 0.019 | -1.56 | -1.2727 | none       |
| AEBP2   | 1.137 | 1.0185  | 3.9811 | 0.00278 | 0.019 | -1.56 | -1.4146 | none       |
| ENDOV   | 0.668 | 0.478   | 3.9806 | 0.00278 | 0.019 | -1.56 | -0.9402 | none       |
| DUSP19  | 0.471 | 0.3179  | 3.9792 | 0.00279 | 0.019 | -1.57 | -0.9387 | none       |
| KBTBD12 | 0.519 | 0.382   | 3.979  | 0.00279 | 0.019 | -1.57 | -1.3046 | none       |
| KCNJ14  | 0.401 | 0.3299  | 3.9786 | 0.00279 | 0.019 | -1.57 | -1.4494 | none       |
| ANKMY1  | 0.654 | 0.6037  | 3.9762 | 0.0028  | 0.019 | -1.57 | -0.3273 | none       |
| MAST1   | 0.688 | 0.5335  | 3.9741 | 0.00281 | 0.02  | -1.57 | -1.4047 | none       |



|           |        |         |        |         |      |       |         |            |
|-----------|--------|---------|--------|---------|------|-------|---------|------------|
| MRO       | 0.444  | 0.3439  | 3.9732 | 0.00282 | 0.02 | -1.58 | -0.852  | none       |
| WDR83     | 0.645  | 0.5663  | 3.9729 | 0.00282 | 0.02 | -1.58 | -1.5492 | OA-related |
| KIAA0319I | 0.747  | 0.6727  | 3.9716 | 0.00282 | 0.02 | -1.58 | -1.3111 | none       |
| ZNF528    | 0.989  | 0.8461  | 3.9707 | 0.00283 | 0.02 | -1.58 | -1.0365 | none       |
| GDF5OS    | 0.584  | 0.4559  | 3.9703 | 0.00283 | 0.02 | -1.58 | -0.9089 | none       |
| CACNB3    | 0.51   | 0.4054  | 3.9702 | 0.00283 | 0.02 | -1.58 | -1.0168 | none       |
| WDR19     | 0.45   | 0.3794  | 3.9693 | 0.00284 | 0.02 | -1.58 | -1.0107 | none       |
| ZNF19     | 0.57   | 0.4091  | 3.9691 | 0.00284 | 0.02 | -1.58 | -1.2913 | none       |
| RORB      | 0.416  | 0.3098  | 3.969  | 0.00284 | 0.02 | -1.58 | -1.4028 | none       |
| SLIT1     | 0.947  | 0.6662  | 3.9682 | 0.00284 | 0.02 | -1.58 | -0.9946 | none       |
| SNCAIP    | 1.144  | 0.9677  | 3.9677 | 0.00284 | 0.02 | -1.58 | -0.7448 | none       |
| GAPDH     | -0.483 | -0.4037 | -3.967 | 0.00284 | 0.02 | -1.58 | 2.03704 | none       |
| CCDC33    | -0.444 | -0.438  | -3.967 | 0.00284 | 0.02 | -1.58 | 1.06481 | none       |
| USP39     | 0.356  | 0.2525  | 3.965  | 0.00285 | 0.02 | -1.59 | -1.0528 | none       |
| PIAS4     | 0.612  | 0.5728  | 3.965  | 0.00285 | 0.02 | -1.59 | -0.8623 | none       |
| METTL21A  | 0.517  | 0.3551  | 3.9637 | 0.00286 | 0.02 | -1.59 | -0.6104 | none       |
| PABPC4    | 0.65   | 0.5575  | 3.9621 | 0.00287 | 0.02 | -1.59 | -0.8744 | none       |
| RBM12B    | 0.475  | 0.4572  | 3.962  | 0.00287 | 0.02 | -1.59 | -0.0548 | none       |
| ATAD2B    | 0.739  | 0.6004  | 3.9612 | 0.00287 | 0.02 | -1.59 | -1.2167 | none       |
| HMBOX1    | 0.851  | 0.717   | 3.9609 | 0.00287 | 0.02 | -1.59 | -0.9457 | none       |
| ZER1      | 0.521  | 0.4481  | 3.9599 | 0.00288 | 0.02 | -1.6  | -0.0086 | none       |
| ALG1L     | 0.928  | 0.7503  | 3.9597 | 0.00288 | 0.02 | -1.6  | -1.2288 | none       |
| TPSB2     | 0.587  | 0.4186  | 3.9591 | 0.00288 | 0.02 | -1.6  | -0.5367 | none       |
| SUMO4     | 0.471  | 0.3144  | 3.9591 | 0.00288 | 0.02 | -1.6  | -0.6061 | none       |
| OR8D4     | 0.421  | 0.3248  | 3.9578 | 0.00289 | 0.02 | -1.6  | -1.0899 | none       |
| SLC12A9   | 0.739  | 0.5987  | 3.9577 | 0.00289 | 0.02 | -1.6  | -0.9775 | none       |
| GK5       | 0.61   | 0.3857  | 3.9577 | 0.00289 | 0.02 | -1.6  | -0.8548 | none       |
| GON4L     | 0.692  | 0.5938  | 3.9573 | 0.00289 | 0.02 | -1.6  | -1.4548 | none       |
| TMOD4     | 0.909  | 0.7281  | 3.9567 | 0.00289 | 0.02 | -1.6  | -0.9547 | none       |
| PPP2R3A   | 0.797  | 0.6298  | 3.9551 | 0.0029  | 0.02 | -1.6  | -1.1822 | none       |
| FBXL13    | 0.567  | 0.3901  | 3.955  | 0.0029  | 0.02 | -1.6  | -1.0897 | none       |
| TSACC     | 0.504  | 0.3793  | 3.9535 | 0.00291 | 0.02 | -1.61 | -0.0703 | none       |
| PIAS1     | 0.416  | 0.3138  | 3.9529 | 0.00291 | 0.02 | -1.61 | -0.2787 | none       |
| GPRC5A    | 0.484  | 0.3415  | 3.9527 | 0.00291 | 0.02 | -1.61 | -1.169  | none       |
| SLC22A9   | 0.591  | 0.456   | 3.9518 | 0.00292 | 0.02 | -1.61 | -1.3691 | none       |
| OPN3      | 0.614  | 0.4218  | 3.9503 | 0.00292 | 0.02 | -1.61 | -1.0541 | none       |
| PINLYP    | 0.557  | 0.4359  | 3.9501 | 0.00292 | 0.02 | -1.61 | -0.8096 | none       |
| TKFC      | 0.5    | 0.4153  | 3.9498 | 0.00292 | 0.02 | -1.61 | -0.9636 | none       |
| RIOK3     | 0.647  | 0.5152  | 3.9493 | 0.00293 | 0.02 | -1.61 | -0.9531 | none       |
| ENG       | 0.791  | 0.6646  | 3.9485 | 0.00293 | 0.02 | -1.61 | -1.1497 | none       |

|          |        |         |        |         |       |       |         |            |
|----------|--------|---------|--------|---------|-------|-------|---------|------------|
| TOX4     | 0.491  | 0.372   | 3.948  | 0.00293 | 0.02  | -1.62 | -0.7086 | none       |
| ARID2    | 1.035  | 0.9144  | 3.9479 | 0.00293 | 0.02  | -1.62 | -1.2562 | none       |
| STMN1    | -0.559 | -0.5034 | -3.946 | 0.00294 | 0.02  | -1.62 | 2.26644 | AA-related |
| CCZ1B    | 0.861  | 0.7125  | 3.945  | 0.00295 | 0.02  | -1.62 | -1.5591 | OA-related |
| FOXM1    | 0.844  | 0.7284  | 3.9448 | 0.00295 | 0.02  | -1.62 | -1.3816 | none       |
| PCCA     | 0.604  | 0.44    | 3.9447 | 0.00295 | 0.02  | -1.62 | -1.3612 | none       |
| ANAPC1   | 0.46   | 0.3666  | 3.9441 | 0.00295 | 0.02  | -1.62 | -0.5486 | none       |
| ZNF440   | 0.885  | 0.7431  | 3.9441 | 0.00295 | 0.02  | -1.62 | -1.3047 | none       |
| PTPN22   | 0.534  | 0.4005  | 3.9439 | 0.00295 | 0.02  | -1.62 | -0.9587 | none       |
| MTMR3    | 0.585  | 0.5553  | 3.9437 | 0.00295 | 0.02  | -1.62 | -0.8131 | none       |
| PCDH11X  | 0.418  | 0.2925  | 3.9434 | 0.00295 | 0.02  | -1.62 | -1.4152 | none       |
| ANKRD46  | 0.733  | 0.4698  | 3.9431 | 0.00296 | 0.02  | -1.62 | -0.8279 | none       |
| ERCC4    | 0.727  | 0.56    | 3.9431 | 0.00296 | 0.02  | -1.62 | -1.0824 | none       |
| ELP4     | 0.513  | 0.3246  | 3.9421 | 0.00296 | 0.02  | -1.62 | -0.71   | none       |
| PDIA5    | 0.818  | 0.6774  | 3.9415 | 0.00296 | 0.02  | -1.63 | -1.1018 | none       |
| PRPF3    | 1.122  | 0.9984  | 3.9406 | 0.00297 | 0.02  | -1.63 | -1.1552 | none       |
| HYAL1    | 0.916  | 0.7629  | 3.939  | 0.00297 | 0.02  | -1.63 | -0.0572 | none       |
| METTL16  | 0.919  | 0.8284  | 3.9384 | 0.00298 | 0.02  | -1.63 | -1.2524 | none       |
| CDC23    | 0.379  | 0.245   | 3.9377 | 0.00298 | 0.02  | -1.63 | -0.8731 | none       |
| CNOT1    | 0.816  | 0.7255  | 3.9375 | 0.00298 | 0.02  | -1.63 | -1.1896 | none       |
| ATG10    | 0.713  | 0.5289  | 3.9369 | 0.00298 | 0.02  | -1.63 | -1.416  | none       |
| CAMK2G   | 0.466  | 0.3874  | 3.9365 | 0.00299 | 0.02  | -1.63 | -0.8164 | none       |
| OR52N1   | 0.353  | 0.2143  | 3.9354 | 0.00299 | 0.02  | -1.64 | -0.8397 | none       |
| NAV3     | 0.772  | 0.6252  | 3.9335 | 0.003   | 0.02  | -1.64 | -1.1343 | none       |
| PCSK7    | 0.898  | 0.8115  | 3.9332 | 0.003   | 0.02  | -1.64 | -1.2459 | none       |
| KANK4    | 0.437  | 0.2988  | 3.9317 | 0.00301 | 0.02  | -1.64 | -1.4523 | none       |
| NUDT5    | -0.379 | -0.3241 | -3.931 | 0.00301 | 0.02  | -1.64 | 2.13276 | AA-related |
| IL20RB   | 0.609  | 0.4254  | 3.9313 | 0.00301 | 0.02  | -1.64 | -0.9346 | none       |
| GLRA1    | 0.638  | 0.4844  | 3.93   | 0.00302 | 0.02  | -1.64 | -1.2942 | none       |
| KLF3     | 0.934  | 0.737   | 3.9296 | 0.00302 | 0.02  | -1.64 | -1.451  | none       |
| CHAF1B   | 0.454  | 0.3409  | 3.9289 | 0.00302 | 0.02  | -1.65 | -1.2828 | none       |
| CSTF3    | 0.639  | 0.5188  | 3.9285 | 0.00302 | 0.02  | -1.65 | -1.3531 | none       |
| WEE1     | 0.506  | 0.4056  | 3.9282 | 0.00303 | 0.02  | -1.65 | -1.188  | none       |
| BORCS7   | 0.479  | 0.3093  | 3.9272 | 0.00303 | 0.02  | -1.65 | -0.8885 | none       |
| C11ORF94 | -0.437 | -0.3417 | -3.925 | 0.00304 | 0.02  | -1.65 | 0.60014 | none       |
| FAM124A  | 0.705  | 0.6389  | 3.9246 | 0.00304 | 0.02  | -1.65 | -1.3404 | none       |
| IL4R     | 0.749  | 0.6987  | 3.9245 | 0.00304 | 0.02  | -1.65 | -1.3003 | none       |
| CLN5     | 0.417  | 0.2614  | 3.9244 | 0.00304 | 0.02  | -1.65 | -1.2599 | none       |
| GNAI1    | 0.508  | 0.3643  | 3.9226 | 0.00305 | 0.02  | -1.66 | -1.397  | none       |
| UBE3C    | 0.447  | 0.314   | 3.9221 | 0.00306 | 0.021 | -1.66 | -1.0217 | none       |

|          |        |         |        |         |       |       |         |            |
|----------|--------|---------|--------|---------|-------|-------|---------|------------|
| ARID3B   | 0.571  | 0.5456  | 3.9217 | 0.00306 | 0.021 | -1.66 | -0.118  | none       |
| STAT6    | 0.684  | 0.611   | 3.9212 | 0.00306 | 0.021 | -1.66 | -1.1115 | none       |
| ACSM5    | 0.395  | 0.3489  | 3.9207 | 0.00306 | 0.021 | -1.66 | 0.65824 | none       |
| RAPGEF6  | 0.819  | 0.6595  | 3.9204 | 0.00306 | 0.021 | -1.66 | -0.6251 | none       |
| RHBDD3   | 0.433  | 0.3703  | 3.9195 | 0.00307 | 0.021 | -1.66 | -1.1553 | none       |
| TMEM236  | 0.474  | 0.3507  | 3.9169 | 0.00308 | 0.021 | -1.66 | -1.507  | none       |
| KIAA1841 | 0.764  | 0.6587  | 3.9166 | 0.00308 | 0.021 | -1.67 | -1.209  | none       |
| PARP2    | 0.548  | 0.4604  | 3.9165 | 0.00308 | 0.021 | -1.67 | -0.7101 | none       |
| HECTD1   | 1.006  | 0.9138  | 3.9156 | 0.00309 | 0.021 | -1.67 | -0.8854 | none       |
| SLC26A11 | 0.617  | 0.4573  | 3.9153 | 0.00309 | 0.021 | -1.67 | -1.2844 | none       |
| EPCAM    | -0.481 | -0.4063 | -3.915 | 0.00309 | 0.021 | -1.67 | 2.03496 | none       |
| RAD23B   | 0.432  | 0.3512  | 3.9151 | 0.00309 | 0.021 | -1.67 | 0.73717 | none       |
| HMGCR    | 1.707  | 1.5536  | 3.9135 | 0.0031  | 0.021 | -1.67 | -1.0801 | none       |
| FFAR4    | 0.529  | 0.4072  | 3.9125 | 0.0031  | 0.021 | -1.67 | -1.1667 | none       |
| FBXW12   | 0.632  | 0.4498  | 3.9124 | 0.0031  | 0.021 | -1.67 | -1.0048 | none       |
| SMAD1    | 0.301  | 0.1696  | 3.9123 | 0.0031  | 0.021 | -1.67 | -0.557  | none       |
| EFEMP2   | -0.657 | -0.529  | -3.912 | 0.00311 | 0.021 | -1.67 | -0.0737 | none       |
| SEC24D   | 0.555  | 0.4796  | 3.9115 | 0.00311 | 0.021 | -1.67 | -0.2216 | none       |
| TREX2    | 0.308  | 0.2388  | 3.9112 | 0.00311 | 0.021 | -1.67 | -1.0932 | none       |
| PKNOX2   | -0.315 | -0.238  | -3.911 | 0.00311 | 0.021 | -1.67 | 1.91317 | none       |
| ABAT     | 0.501  | 0.4736  | 3.9099 | 0.00312 | 0.021 | -1.68 | -0.3235 | none       |
| SLC12A3  | 0.505  | 0.3634  | 3.9099 | 0.00312 | 0.021 | -1.68 | -1.4082 | none       |
| ZNF543   | 0.583  | 0.4749  | 3.9096 | 0.00312 | 0.021 | -1.68 | -1.5099 | none       |
| QRSL1    | 0.498  | 0.3776  | 3.9091 | 0.00312 | 0.021 | -1.68 | -0.725  | none       |
| ZNF284   | 0.595  | 0.473   | 3.9087 | 0.00312 | 0.021 | -1.68 | -1.4086 | none       |
| JAK3     | 0.632  | 0.565   | 3.9087 | 0.00312 | 0.021 | -1.68 | -1.5225 | none       |
| BRI3BP   | 0.662  | 0.5688  | 3.9084 | 0.00312 | 0.021 | -1.68 | -1.4921 | none       |
| CACNG8   | 0.372  | 0.2604  | 3.9082 | 0.00312 | 0.021 | -1.68 | -1.2623 | none       |
| DPY19L4  | 0.407  | 0.2736  | 3.908  | 0.00312 | 0.021 | -1.68 | -0.4979 | none       |
| RNF223   | 0.296  | 0.1982  | 3.9078 | 0.00313 | 0.021 | -1.68 | -0.7639 | none       |
| ZNF23    | 0.487  | 0.4452  | 3.9078 | 0.00313 | 0.021 | -1.68 | -0.8629 | none       |
| OR2AP1   | 0.723  | 0.5411  | 3.9067 | 0.00313 | 0.021 | -1.68 | -1.41   | none       |
| CYB561   | 0.783  | 0.5513  | 3.9039 | 0.00315 | 0.021 | -1.69 | -1.0962 | none       |
| CXCL16   | 0.588  | 0.4227  | 3.9037 | 0.00315 | 0.021 | -1.69 | -1.3044 | none       |
| EIF4A1   | -0.377 | -0.3086 | -3.903 | 0.00315 | 0.021 | -1.69 | 2.25717 | AA-related |
| ZNF639   | 0.545  | 0.3975  | 3.9024 | 0.00315 | 0.021 | -1.69 | -1.4107 | none       |
| GSDMA    | 0.49   | 0.4139  | 3.9022 | 0.00315 | 0.021 | -1.69 | -1.1577 | none       |
| ZMPSTE24 | 0.7    | 0.4411  | 3.9018 | 0.00316 | 0.021 | -1.69 | -0.9027 | none       |
| EYA3     | 0.623  | 0.5022  | 3.9016 | 0.00316 | 0.021 | -1.69 | -1.069  | none       |
| CNGA1    | 0.743  | 0.5822  | 3.8994 | 0.00317 | 0.021 | -1.69 | -0.4538 | none       |

|          |        |        |        |         |       |       |         |      |
|----------|--------|--------|--------|---------|-------|-------|---------|------|
| TMEM150  | 0.775  | 0.5599 | 3.8993 | 0.00317 | 0.021 | -1.69 | -1.1543 | none |
| BVES     | 0.379  | 0.2734 | 3.8992 | 0.00317 | 0.021 | -1.69 | -0.9407 | none |
| ZHX3     | 0.87   | 0.8083 | 3.8982 | 0.00317 | 0.021 | -1.69 | -0.6009 | none |
| PIK3R1   | 0.89   | 0.7452 | 3.8977 | 0.00318 | 0.021 | -1.7  | -0.8084 | none |
| TSPAN5   | 0.428  | 0.3321 | 3.8975 | 0.00318 | 0.021 | -1.7  | -0.232  | none |
| TRPC6    | 0.733  | 0.4963 | 3.8972 | 0.00318 | 0.021 | -1.7  | -0.4213 | none |
| KCNJ15   | 0.532  | 0.406  | 3.8955 | 0.00319 | 0.021 | -1.7  | -0.9563 | none |
| CD163    | 0.602  | 0.4494 | 3.8951 | 0.00319 | 0.021 | -1.7  | -0.9271 | none |
| OR4K13   | 0.409  | 0.2896 | 3.8949 | 0.00319 | 0.021 | -1.7  | -1.5017 | none |
| DCAF10   | 0.533  | 0.3985 | 3.8948 | 0.00319 | 0.021 | -1.7  | -0.5675 | none |
| ZFP2     | 0.567  | 0.4324 | 3.8947 | 0.00319 | 0.021 | -1.7  | -1.4522 | none |
| CUX1     | 0.876  | 0.8359 | 3.8937 | 0.0032  | 0.021 | -1.7  | -0.5925 | none |
| C12ORF65 | 0.631  | 0.5428 | 3.8936 | 0.0032  | 0.021 | -1.7  | -1.1807 | none |
| PIK3C2B  | 0.768  | 0.7376 | 3.8922 | 0.0032  | 0.021 | -1.7  | -0.3665 | none |
| NADK2    | 0.561  | 0.4121 | 3.8909 | 0.00321 | 0.021 | -1.71 | -1.1262 | none |
| DNAJC12  | 0.732  | 0.5537 | 3.8901 | 0.00321 | 0.021 | -1.71 | -1.3543 | none |
| CSF3R    | 1.092  | 0.8276 | 3.8899 | 0.00322 | 0.021 | -1.71 | -1.1454 | none |
| ZNF763   | 0.393  | 0.2762 | 3.8898 | 0.00322 | 0.021 | -1.71 | -1.1175 | none |
| ZNF441   | 0.618  | 0.4873 | 3.8895 | 0.00322 | 0.021 | -1.71 | -0.3417 | none |
| PDE8A    | 0.981  | 0.798  | 3.8891 | 0.00322 | 0.021 | -1.71 | -1.3441 | none |
| ABCC1    | 0.861  | 0.7484 | 3.8891 | 0.00322 | 0.021 | -1.71 | -1.5078 | none |
| ATG13    | 0.614  | 0.5122 | 3.8871 | 0.00323 | 0.021 | -1.71 | -1.4696 | none |
| FRRS1    | 0.684  | 0.5223 | 3.8862 | 0.00323 | 0.021 | -1.71 | -1.2056 | none |
| ENO1     | -0.372 | -0.29  | -3.886 | 0.00324 | 0.021 | -1.71 | 2.06627 | none |
| MED18    | 0.755  | 0.6518 | 3.8859 | 0.00324 | 0.021 | -1.71 | -1.0222 | none |
| PRR27    | 0.357  | 0.2618 | 3.8853 | 0.00324 | 0.021 | -1.72 | -0.8028 | none |
| ITGAL    | 0.768  | 0.6558 | 3.8853 | 0.00324 | 0.021 | -1.72 | -1.4163 | none |
| PAFAH1B2 | 0.562  | 0.3498 | 3.8826 | 0.00325 | 0.021 | -1.72 | -1.4745 | none |
| NDUFV3   | 0.568  | 0.4869 | 3.8822 | 0.00326 | 0.021 | -1.72 | -1.2725 | none |
| PRKACA   | 0.713  | 0.6844 | 3.8821 | 0.00326 | 0.021 | -1.72 | -0.6948 | none |
| CMBL     | 0.476  | 0.3465 | 3.8815 | 0.00326 | 0.021 | -1.72 | -1.331  | none |
| ARMC8    | 0.452  | 0.345  | 3.8814 | 0.00326 | 0.021 | -1.72 | -1.0855 | none |
| APOOL    | 0.871  | 0.738  | 3.8804 | 0.00327 | 0.021 | -1.72 | -1.4428 | none |
| NASP     | 0.761  | 0.6563 | 3.8799 | 0.00327 | 0.021 | -1.72 | -1.2676 | none |
| KNG1     | 0.368  | 0.2628 | 3.8793 | 0.00327 | 0.021 | -1.72 | -1.2013 | none |
| NOX5     | 0.421  | 0.2941 | 3.8779 | 0.00328 | 0.021 | -1.73 | -1.2882 | none |
| USE1     | 0.533  | 0.3676 | 3.8779 | 0.00328 | 0.021 | -1.73 | -1.2873 | none |
| ACSS2    | 0.377  | 0.247  | 3.8779 | 0.00328 | 0.021 | -1.73 | -0.3973 | none |
| OR1L8    | 0.569  | 0.402  | 3.8779 | 0.00328 | 0.021 | -1.73 | -0.939  | none |
| TRAF3    | 0.666  | 0.6014 | 3.8777 | 0.00328 | 0.021 | -1.73 | -1.3332 | none |

|          |        |         |        |         |       |       |         |            |
|----------|--------|---------|--------|---------|-------|-------|---------|------------|
| MICAL3   | 1.028  | 0.9576  | 3.8773 | 0.00328 | 0.021 | -1.73 | -0.9399 | none       |
| ITGA1    | 0.647  | 0.5116  | 3.8765 | 0.00329 | 0.021 | -1.73 | -0.9049 | none       |
| ACBD5    | 0.609  | 0.4879  | 3.8753 | 0.00329 | 0.021 | -1.73 | -0.5505 | none       |
| ATP1A4   | 0.616  | 0.4566  | 3.8746 | 0.0033  | 0.021 | -1.73 | -1.0012 | none       |
| GPR78    | 0.448  | 0.3547  | 3.8733 | 0.0033  | 0.021 | -1.73 | -0.5611 | none       |
| PCDHB16  | 0.33   | 0.2495  | 3.8725 | 0.00331 | 0.021 | -1.74 | -1.4817 | none       |
| CNEP1R1  | 0.53   | 0.3642  | 3.8716 | 0.00331 | 0.021 | -1.74 | -0.4445 | none       |
| LGALS8   | 0.614  | 0.4328  | 3.8716 | 0.00331 | 0.021 | -1.74 | -1.1226 | none       |
| ABHD16A  | 1.295  | 0.9305  | 3.8714 | 0.00331 | 0.021 | -1.74 | -0.6719 | none       |
| PRPF19   | 0.436  | 0.4086  | 3.8685 | 0.00333 | 0.022 | -1.74 | -0.6547 | none       |
| ZNF829   | 0.739  | 0.6141  | 3.8674 | 0.00333 | 0.022 | -1.74 | -1.607  | OA-related |
| TNRC18   | 1.484  | 1.3627  | 3.8668 | 0.00334 | 0.022 | -1.74 | -1.1014 | none       |
| THOC5    | 0.646  | 0.5376  | 3.8667 | 0.00334 | 0.022 | -1.74 | -0.8249 | none       |
| ENTPD4   | 0.681  | 0.6033  | 3.8665 | 0.00334 | 0.022 | -1.75 | -1.0569 | none       |
| CYP8B1   | 0.388  | 0.283   | 3.8664 | 0.00334 | 0.022 | -1.75 | -1.2191 | none       |
| IRAK1    | 0.554  | 0.5686  | 3.8644 | 0.00335 | 0.022 | -1.75 | -0.6881 | none       |
| MAPK6    | 0.758  | 0.5762  | 3.8635 | 0.00335 | 0.022 | -1.75 | -1.1606 | none       |
| USP9Y    | 0.435  | 0.3116  | 3.8633 | 0.00336 | 0.022 | -1.75 | -1.2497 | none       |
| TUFT1    | 0.782  | 0.5914  | 3.863  | 0.00336 | 0.022 | -1.75 | -1.4169 | none       |
| SMU1     | 0.368  | 0.2478  | 3.8626 | 0.00336 | 0.022 | -1.75 | -1.3668 | none       |
| SLC15A4  | 0.593  | 0.4414  | 3.8618 | 0.00336 | 0.022 | -1.75 | -1.0427 | none       |
| C12ORF60 | 0.618  | 0.5025  | 3.8618 | 0.00336 | 0.022 | -1.75 | -1.1918 | none       |
| ZNF99    | 0.416  | 0.299   | 3.8612 | 0.00337 | 0.022 | -1.75 | -1.1164 | none       |
| PLXNB1   | -0.477 | -0.3151 | -3.861 | 0.00337 | 0.022 | -1.75 | 1.98502 | none       |
| ART3     | 0.605  | 0.4416  | 3.8589 | 0.00338 | 0.022 | -1.76 | -0.9936 | none       |
| NISCH    | 0.843  | 0.786   | 3.858  | 0.00338 | 0.022 | -1.76 | -1.338  | none       |
| GATAD2A  | 1.497  | 1.4088  | 3.8577 | 0.00339 | 0.022 | -1.76 | -1.0995 | none       |
| DTX3L    | 0.61   | 0.5073  | 3.8563 | 0.00339 | 0.022 | -1.76 | -1.3184 | none       |
| SPATS2L  | 1.094  | 0.9487  | 3.8563 | 0.00339 | 0.022 | -1.76 | -1.3115 | none       |
| NFASC    | 0.541  | 0.4175  | 3.8559 | 0.0034  | 0.022 | -1.76 | -1.4192 | none       |
| OR2T12   | 0.485  | 0.3822  | 3.8551 | 0.0034  | 0.022 | -1.76 | -1.4027 | none       |
| CASR     | 0.3    | 0.2323  | 3.8548 | 0.0034  | 0.022 | -1.76 | -1.417  | none       |
| PTK7     | 0.831  | 0.64    | 3.8527 | 0.00341 | 0.022 | -1.77 | -1.469  | none       |
| RGS10    | -0.359 | -0.2874 | -3.851 | 0.00342 | 0.022 | -1.77 | 1.99007 | none       |
| SCAI     | 0.412  | 0.3265  | 3.8512 | 0.00342 | 0.022 | -1.77 | 0.28622 | none       |
| SETD7    | 0.581  | 0.4692  | 3.8512 | 0.00342 | 0.022 | -1.77 | -1.4683 | none       |
| LEAP2    | 0.475  | 0.4339  | 3.851  | 0.00342 | 0.022 | -1.77 | -1.2852 | none       |
| ZNF783   | 0.553  | 0.473   | 3.8505 | 0.00342 | 0.022 | -1.77 | -0.5881 | none       |
| NSUN2    | 0.874  | 0.803   | 3.8499 | 0.00343 | 0.022 | -1.77 | -0.8442 | none       |
| DCBLD1   | 0.654  | 0.5151  | 3.8496 | 0.00343 | 0.022 | -1.77 | -1.2932 | none       |

|           |        |         |        |         |       |       |         |      |
|-----------|--------|---------|--------|---------|-------|-------|---------|------|
| KIAA1324  | 0.648  | 0.5552  | 3.8495 | 0.00343 | 0.022 | -1.77 | -0.9372 | none |
| MRPS31    | 0.6    | 0.4461  | 3.8495 | 0.00343 | 0.022 | -1.77 | -1.4573 | none |
| RAD9B     | 0.662  | 0.5403  | 3.8489 | 0.00343 | 0.022 | -1.77 | -0.794  | none |
| GPR161    | 1.5    | 1.2081  | 3.8484 | 0.00344 | 0.022 | -1.77 | -1.2161 | none |
| TMEM63A   | 0.552  | 0.4907  | 3.8476 | 0.00344 | 0.022 | -1.78 | -0.82   | none |
| ATG14     | 0.49   | 0.4076  | 3.8476 | 0.00344 | 0.022 | -1.78 | -1.3723 | none |
| PPIP5K1   | 0.627  | 0.5213  | 3.8471 | 0.00344 | 0.022 | -1.78 | -1.2265 | none |
| PLCD3     | 0.68   | 0.4978  | 3.8469 | 0.00344 | 0.022 | -1.78 | -0.7463 | none |
| ZBED5     | 0.499  | 0.396   | 3.8464 | 0.00345 | 0.022 | -1.78 | -0.5371 | none |
| GPATCH1   | 0.825  | 0.6963  | 3.8447 | 0.00346 | 0.022 | -1.78 | -1.1654 | none |
| CLPB      | 0.584  | 0.5036  | 3.8447 | 0.00346 | 0.022 | -1.78 | -0.708  | none |
| LRRC19    | 0.339  | 0.2453  | 3.8445 | 0.00346 | 0.022 | -1.78 | -1.1702 | none |
| SMAGP     | 0.683  | 0.499   | 3.8436 | 0.00346 | 0.022 | -1.78 | -1.0131 | none |
| C2CD4A    | 0.42   | 0.2994  | 3.8433 | 0.00346 | 0.022 | -1.78 | -1.3281 | none |
| KLF8      | 0.347  | 0.2633  | 3.8433 | 0.00346 | 0.022 | -1.78 | -1.2102 | none |
| ARPC4-TTI | -0.673 | -0.5477 | -3.843 | 0.00347 | 0.022 | -1.78 | 2.07115 | none |
| SCARF1    | 0.579  | 0.5127  | 3.8413 | 0.00348 | 0.022 | -1.79 | -1.2277 | none |
| L3MBTL4   | 0.474  | 0.3751  | 3.8412 | 0.00348 | 0.022 | -1.79 | -1.4156 | none |
| ZNF486    | 0.614  | 0.4666  | 3.8406 | 0.00348 | 0.022 | -1.79 | -0.932  | none |
| TCAIM     | 0.487  | 0.3513  | 3.8399 | 0.00348 | 0.022 | -1.79 | -0.1688 | none |
| MAP1S     | 0.588  | 0.4809  | 3.8398 | 0.00348 | 0.022 | -1.79 | -1.4152 | none |
| ITGA2B    | 0.551  | 0.4029  | 3.8392 | 0.00349 | 0.022 | -1.79 | -1.1453 | none |
| PPARG     | 0.571  | 0.427   | 3.8391 | 0.00349 | 0.022 | -1.79 | -1.0365 | none |
| NDUFA7    | 0.652  | 0.4002  | 3.8389 | 0.00349 | 0.022 | -1.79 | -1.2014 | none |
| ZNF570    | 0.598  | 0.487   | 3.8387 | 0.00349 | 0.022 | -1.79 | -1.4209 | none |
| TBCEL     | 0.82   | 0.6457  | 3.8386 | 0.00349 | 0.022 | -1.79 | -0.6322 | none |
| PCNX1     | 0.924  | 0.6947  | 3.8384 | 0.00349 | 0.022 | -1.79 | -0.67   | none |
| DSTYK     | 0.603  | 0.4989  | 3.8376 | 0.0035  | 0.022 | -1.79 | -1.3216 | none |
| AARD      | 0.707  | 0.6017  | 3.8375 | 0.0035  | 0.022 | -1.79 | -0.9748 | none |
| SLC9B1    | 0.646  | 0.4167  | 3.8365 | 0.0035  | 0.022 | -1.79 | -1.136  | none |
| CERKL     | 0.84   | 0.6803  | 3.8361 | 0.0035  | 0.022 | -1.79 | -1.086  | none |
| DLG5      | 0.446  | 0.3722  | 3.8348 | 0.00351 | 0.022 | -1.8  | -1.1587 | none |
| HFE       | 0.513  | 0.3876  | 3.8338 | 0.00352 | 0.022 | -1.8  | -1.2738 | none |
| KCNJ6     | 0.323  | 0.2321  | 3.8334 | 0.00352 | 0.022 | -1.8  | -1.3811 | none |
| XPO1      | 0.69   | 0.5578  | 3.8329 | 0.00352 | 0.022 | -1.8  | -0.8547 | none |
| RNASE10   | 0.386  | 0.3147  | 3.8322 | 0.00353 | 0.022 | -1.8  | -0.8263 | none |
| COG5      | 0.549  | 0.4079  | 3.8322 | 0.00353 | 0.022 | -1.8  | -0.735  | none |
| RUVBL2    | 0.368  | 0.3227  | 3.8319 | 0.00353 | 0.022 | -1.8  | -1.2035 | none |
| POLR3A    | 0.82   | 0.7383  | 3.8311 | 0.00353 | 0.022 | -1.8  | -1.1272 | none |
| LCAT      | 0.796  | 0.7083  | 3.8308 | 0.00353 | 0.022 | -1.8  | -1.1741 | none |

|          |       |        |        |         |       |       |         |            |
|----------|-------|--------|--------|---------|-------|-------|---------|------------|
| LIPG     | 0.475 | 0.3601 | 3.8308 | 0.00353 | 0.022 | -1.8  | -1.452  | none       |
| GLT8D1   | 0.531 | 0.3445 | 3.8304 | 0.00354 | 0.022 | -1.8  | -1.3091 | none       |
| YTHDC2   | 0.85  | 0.7454 | 3.8301 | 0.00354 | 0.022 | -1.8  | -0.4864 | none       |
| GNLY     | 0.61  | 0.4504 | 3.8301 | 0.00354 | 0.022 | -1.8  | -0.5079 | none       |
| SH2D1B   | 0.717 | 0.4661 | 3.8298 | 0.00354 | 0.022 | -1.8  | -0.0922 | none       |
| CYP2F1   | 0.95  | 0.7922 | 3.8297 | 0.00354 | 0.022 | -1.8  | -0.9183 | none       |
| TBC1D32  | 0.585 | 0.4496 | 3.8295 | 0.00354 | 0.022 | -1.8  | -0.9817 | none       |
| CD36     | 0.64  | 0.4707 | 3.8282 | 0.00355 | 0.022 | -1.81 | -1.3808 | none       |
| ABCA5    | 0.553 | 0.4186 | 3.8277 | 0.00355 | 0.022 | -1.81 | -1.0004 | none       |
| ATP10B   | 0.612 | 0.4742 | 3.8261 | 0.00356 | 0.022 | -1.81 | -0.5829 | none       |
| TNK1     | 0.372 | 0.3763 | 3.8248 | 0.00357 | 0.022 | -1.81 | 0.587   | none       |
| KIF1BP   | 0.476 | 0.3649 | 3.8236 | 0.00358 | 0.022 | -1.81 | -1.2554 | none       |
| ZC3HC1   | 0.511 | 0.3272 | 3.8234 | 0.00358 | 0.022 | -1.81 | -0.7726 | none       |
| WDR20    | 0.409 | 0.2967 | 3.8233 | 0.00358 | 0.022 | -1.81 | -0.9988 | none       |
| F3       | 0.509 | 0.3687 | 3.8226 | 0.00358 | 0.022 | -1.82 | -1.3455 | none       |
| ME2      | 0.4   | 0.3111 | 3.8225 | 0.00358 | 0.022 | -1.82 | 0.35518 | none       |
| SRPK3    | 0.515 | 0.3511 | 3.8219 | 0.00358 | 0.022 | -1.82 | -1.1548 | none       |
| ERAP1    | 0.599 | 0.4922 | 3.8213 | 0.00359 | 0.022 | -1.82 | -0.8332 | none       |
| RSAD2    | 0.488 | 0.3663 | 3.8209 | 0.00359 | 0.022 | -1.82 | -1.0569 | none       |
| LRRC25   | 0.524 | 0.3859 | 3.8202 | 0.00359 | 0.023 | -1.82 | -1.4765 | none       |
| FBXO38   | 0.581 | 0.4675 | 3.8175 | 0.00361 | 0.023 | -1.82 | -1.4925 | none       |
| CCDC159  | 0.631 | 0.4613 | 3.8175 | 0.00361 | 0.023 | -1.82 | -1.3779 | none       |
| MCPH1    | 0.83  | 0.7199 | 3.8174 | 0.00361 | 0.023 | -1.82 | -0.988  | none       |
| KIAA0408 | 0.508 | 0.4293 | 3.8163 | 0.00362 | 0.023 | -1.83 | -1.5034 | none       |
| LBX2     | 0.656 | 0.4096 | 3.8155 | 0.00362 | 0.023 | -1.83 | -1.4223 | none       |
| POLR2A   | 1.029 | 0.9754 | 3.8154 | 0.00362 | 0.023 | -1.83 | -1.2249 | none       |
| SUSD6    | 0.367 | 0.2997 | 3.8143 | 0.00363 | 0.023 | -1.83 | -0.2365 | none       |
| FSD2     | 0.427 | 0.3045 | 3.8143 | 0.00363 | 0.023 | -1.83 | -1.0481 | none       |
| DPF2     | 0.358 | 0.2437 | 3.8142 | 0.00363 | 0.023 | -1.83 | -0.9811 | none       |
| EHMT2    | 0.493 | 0.4194 | 3.8138 | 0.00363 | 0.023 | -1.83 | -0.8412 | none       |
| PAPOLG   | 0.867 | 0.7042 | 3.8137 | 0.00363 | 0.023 | -1.83 | -0.8079 | none       |
| HIF3A    | 0.603 | 0.4378 | 3.8137 | 0.00363 | 0.023 | -1.83 | -1.4546 | none       |
| REV1     | 0.685 | 0.6005 | 3.8129 | 0.00364 | 0.023 | -1.83 | -1.1519 | none       |
| TAF2     | 0.692 | 0.5951 | 3.8119 | 0.00364 | 0.023 | -1.83 | -0.8466 | none       |
| SLC25A15 | 0.489 | 0.4019 | 3.8116 | 0.00364 | 0.023 | -1.83 | -1.1077 | none       |
| C9ORF78  | 0.583 | 0.489  | 3.8114 | 0.00365 | 0.023 | -1.83 | -1.3085 | none       |
| GLTP     | 0.573 | 0.4696 | 3.8113 | 0.00365 | 0.023 | -1.83 | -1.5724 | OA-related |
| MAVS     | 0.612 | 0.5826 | 3.8112 | 0.00365 | 0.023 | -1.83 | -0.9922 | none       |
| FBXW8    | 0.955 | 0.7722 | 3.8105 | 0.00365 | 0.023 | -1.83 | -1.5249 | none       |
| TPMT     | 0.449 | 0.2715 | 3.8103 | 0.00365 | 0.023 | -1.83 | -1.0969 | none       |

|          |        |         |        |         |       |       |         |      |
|----------|--------|---------|--------|---------|-------|-------|---------|------|
| NFAT5    | 0.842  | 0.7504  | 3.8093 | 0.00366 | 0.023 | -1.84 | -1.2281 | none |
| EFCAB3   | 0.707  | 0.6088  | 3.8084 | 0.00366 | 0.023 | -1.84 | -1.3556 | none |
| OR2J2    | 0.487  | 0.3366  | 3.808  | 0.00367 | 0.023 | -1.84 | -1.4331 | none |
| ZNF480   | 0.942  | 0.7957  | 3.8078 | 0.00367 | 0.023 | -1.84 | -1.3758 | none |
| EHBP1    | 0.673  | 0.5544  | 3.807  | 0.00367 | 0.023 | -1.84 | -1.3517 | none |
| ROBO3    | -0.445 | -0.2359 | -3.807 | 0.00367 | 0.023 | -1.84 | 1.26489 | none |
| CERS3    | 0.78   | 0.5929  | 3.8066 | 0.00367 | 0.023 | -1.84 | -1.4005 | none |
| DDX47    | 0.42   | 0.2802  | 3.805  | 0.00368 | 0.023 | -1.84 | -1.4464 | none |
| DNAJC16  | 0.843  | 0.6433  | 3.8029 | 0.0037  | 0.023 | -1.85 | -1.417  | none |
| CTSW     | 0.566  | 0.3972  | 3.8027 | 0.0037  | 0.023 | -1.85 | -0.9758 | none |
| EIF4E    | 0.44   | 0.231   | 3.8023 | 0.0037  | 0.023 | -1.85 | -0.7709 | none |
| ZNF93    | 0.511  | 0.3487  | 3.8014 | 0.0037  | 0.023 | -1.85 | -1.1882 | none |
| NBPF11   | 0.453  | 0.3715  | 3.8011 | 0.00371 | 0.023 | -1.85 | 0.13532 | none |
| DUSP28   | 0.558  | 0.3953  | 3.8004 | 0.00371 | 0.023 | -1.85 | -1.2103 | none |
| C8ORF76  | 0.348  | 0.1651  | 3.8003 | 0.00371 | 0.023 | -1.85 | -0.3822 | none |
| UBE3A    | 0.519  | 0.4592  | 3.8001 | 0.00371 | 0.023 | -1.85 | -0.5569 | none |
| INCA1    | 0.557  | 0.4651  | 3.7997 | 0.00371 | 0.023 | -1.85 | -0.7765 | none |
| TM4SF19  | 0.582  | 0.4296  | 3.7989 | 0.00372 | 0.023 | -1.85 | -1.4757 | none |
| WDFY3    | 0.602  | 0.4813  | 3.7983 | 0.00372 | 0.023 | -1.85 | -1.4488 | none |
| SBF2     | 0.68   | 0.5329  | 3.7974 | 0.00373 | 0.023 | -1.86 | -1.1354 | none |
| R3HDM2   | 1.007  | 0.952   | 3.7962 | 0.00374 | 0.023 | -1.86 | -1.3471 | none |
| PTPN14   | 0.491  | 0.3937  | 3.7923 | 0.00376 | 0.023 | -1.86 | -1.273  | none |
| UBIAD1   | 0.492  | 0.3662  | 3.7919 | 0.00376 | 0.023 | -1.86 | -0.9126 | none |
| RAP1GAP2 | 0.451  | 0.3387  | 3.7916 | 0.00376 | 0.023 | -1.86 | -1.0097 | none |
| EIF4E1B  | 0.466  | 0.3377  | 3.7913 | 0.00376 | 0.023 | -1.87 | -1.4669 | none |
| AFF3     | 0.565  | 0.4365  | 3.7913 | 0.00376 | 0.023 | -1.87 | -0.9883 | none |
| ZHX1     | 1.068  | 0.9753  | 3.7911 | 0.00377 | 0.023 | -1.87 | -0.9341 | none |
| OGFRL1   | 0.546  | 0.418   | 3.7889 | 0.00378 | 0.023 | -1.87 | -0.946  | none |
| LURAP1   | 0.523  | 0.3824  | 3.7886 | 0.00378 | 0.023 | -1.87 | -1.0813 | none |
| HRH4     | 0.479  | 0.3201  | 3.7872 | 0.00379 | 0.023 | -1.87 | -1.4853 | none |
| MLPH     | 0.866  | 0.6729  | 3.7855 | 0.0038  | 0.023 | -1.87 | -0.7137 | none |
| UBN2     | 0.754  | 0.6405  | 3.7845 | 0.00381 | 0.023 | -1.88 | -1.5191 | none |
| CCDC170  | 0.299  | 0.1913  | 3.7843 | 0.00381 | 0.023 | -1.88 | -1.302  | none |
| CA5B     | 0.547  | 0.3863  | 3.7836 | 0.00381 | 0.023 | -1.88 | -1.1419 | none |
| CLASP2   | 0.719  | 0.652   | 3.783  | 0.00382 | 0.023 | -1.88 | -0.9263 | none |
| BTBD2    | 0.474  | 0.4281  | 3.7826 | 0.00382 | 0.023 | -1.88 | -0.9974 | none |
| KCNJ5    | 0.444  | 0.3332  | 3.7824 | 0.00382 | 0.023 | -1.88 | -1.5067 | none |
| CD3G     | 0.458  | 0.293   | 3.7824 | 0.00382 | 0.023 | -1.88 | -1.3416 | none |
| COL4A1   | 0.681  | 0.5517  | 3.7823 | 0.00382 | 0.023 | -1.88 | -1.2467 | none |
| SFXN3    | 0.428  | 0.3339  | 3.7822 | 0.00382 | 0.023 | -1.88 | -1.3139 | none |



|          |        |         |        |         |       |       |         |            |
|----------|--------|---------|--------|---------|-------|-------|---------|------------|
| IL12RB1  | 0.415  | 0.2638  | 3.7817 | 0.00382 | 0.023 | -1.88 | -1.3989 | none       |
| GLDC     | 0.718  | 0.5343  | 3.7808 | 0.00383 | 0.023 | -1.88 | -0.9681 | none       |
| GTPBP1   | 0.63   | 0.587   | 3.7795 | 0.00384 | 0.023 | -1.88 | -1.4506 | none       |
| B3GNT6   | 0.463  | 0.3592  | 3.7795 | 0.00384 | 0.023 | -1.88 | -1.1851 | none       |
| MYO5A    | 1.442  | 1.3417  | 3.7788 | 0.00384 | 0.023 | -1.89 | -1.2455 | none       |
| SLC13A4  | 0.338  | 0.283   | 3.7779 | 0.00385 | 0.024 | -1.89 | -1.168  | none       |
| DVL2     | 0.436  | 0.3816  | 3.7753 | 0.00386 | 0.024 | -1.89 | -1.0216 | none       |
| MLYCD    | 0.356  | 0.2447  | 3.7744 | 0.00387 | 0.024 | -1.89 | -0.709  | none       |
| SNF8     | 0.553  | 0.4075  | 3.7739 | 0.00387 | 0.024 | -1.89 | -1.229  | none       |
| PLA2G2C  | 0.478  | 0.3857  | 3.7739 | 0.00387 | 0.024 | -1.89 | -1.3605 | none       |
| CDK13    | 1.004  | 0.948   | 3.7737 | 0.00387 | 0.024 | -1.89 | -1.1732 | none       |
| HIP1R    | 0.538  | 0.5098  | 3.773  | 0.00388 | 0.024 | -1.89 | -0.4677 | none       |
| TMC2     | 0.475  | 0.3844  | 3.773  | 0.00388 | 0.024 | -1.89 | -1.2717 | none       |
| ALDH5A1  | 0.461  | 0.355   | 3.7719 | 0.00388 | 0.024 | -1.9  | -0.8158 | none       |
| RAB11A   | -0.436 | -0.3706 | -3.771 | 0.00389 | 0.024 | -1.9  | 2.18129 | AA-related |
| ZNF234   | 0.577  | 0.4734  | 3.771  | 0.00389 | 0.024 | -1.9  | -1.4303 | none       |
| TBXAS1   | 0.605  | 0.4611  | 3.7698 | 0.0039  | 0.024 | -1.9  | 0.34288 | none       |
| ZNF835   | 0.607  | 0.4817  | 3.7687 | 0.0039  | 0.024 | -1.9  | -0.9976 | none       |
| PTCHD3   | 0.692  | 0.5208  | 3.7687 | 0.0039  | 0.024 | -1.9  | -1.2028 | none       |
| CDC42EP1 | 0.588  | 0.4434  | 3.7674 | 0.00391 | 0.024 | -1.9  | -1.4367 | none       |
| EXOC2    | 0.449  | 0.4003  | 3.7673 | 0.00391 | 0.024 | -1.9  | -0.4709 | none       |
| MAPKAPK1 | 0.564  | 0.4696  | 3.7669 | 0.00392 | 0.024 | -1.9  | -0.1344 | none       |
| ZNF738   | 0.614  | 0.4312  | 3.7666 | 0.00392 | 0.024 | -1.9  | -0.787  | none       |
| FABP2    | 0.285  | 0.1991  | 3.7657 | 0.00392 | 0.024 | -1.91 | 0.64058 | none       |
| ZNF579   | 0.465  | 0.2809  | 3.7654 | 0.00392 | 0.024 | -1.91 | 0.54512 | none       |
| MRPS27   | 0.499  | 0.3951  | 3.7653 | 0.00393 | 0.024 | -1.91 | -0.8544 | none       |
| AKAP6    | 0.587  | 0.3949  | 3.7646 | 0.00393 | 0.024 | -1.91 | -1.2087 | none       |
| MCCC2    | 0.314  | 0.2199  | 3.7645 | 0.00393 | 0.024 | -1.91 | -0.5717 | none       |
| ZNF329   | 0.843  | 0.7271  | 3.7645 | 0.00393 | 0.024 | -1.91 | -1.2165 | none       |
| ZNF414   | 0.629  | 0.5015  | 3.7644 | 0.00393 | 0.024 | -1.91 | -1.265  | none       |
| HELB     | 0.682  | 0.5942  | 3.7636 | 0.00394 | 0.024 | -1.91 | -1.295  | none       |
| SUCLA2   | 0.401  | 0.3215  | 3.7636 | 0.00394 | 0.024 | -1.91 | -1.4191 | none       |
| ABHD15   | 0.351  | 0.2827  | 3.7629 | 0.00394 | 0.024 | -1.91 | -1.0873 | none       |
| XYLB     | 0.394  | 0.2918  | 3.7627 | 0.00394 | 0.024 | -1.91 | -1.0022 | none       |
| ZNF689   | 0.367  | 0.3286  | 3.7626 | 0.00394 | 0.024 | -1.91 | -0.5426 | none       |
| ESR1     | 0.622  | 0.4666  | 3.7622 | 0.00394 | 0.024 | -1.91 | -0.812  | none       |
| FBXO42   | 0.408  | 0.3717  | 3.7613 | 0.00395 | 0.024 | -1.91 | -0.9457 | none       |
| ADGRG2   | 0.486  | 0.3538  | 3.7613 | 0.00395 | 0.024 | -1.91 | -1.4822 | none       |
| ZBTB20   | 0.817  | 0.6064  | 3.7613 | 0.00395 | 0.024 | -1.91 | -0.6678 | none       |
| UBFD1    | 0.479  | 0.3831  | 3.7612 | 0.00395 | 0.024 | -1.91 | -0.9738 | none       |

|         |       |        |        |         |       |       |         |            |
|---------|-------|--------|--------|---------|-------|-------|---------|------------|
| IARS    | 0.634 | 0.517  | 3.7611 | 0.00395 | 0.024 | -1.91 | -1.1038 | none       |
| NPAP1   | 0.27  | 0.1747 | 3.7609 | 0.00395 | 0.024 | -1.91 | -1.0501 | none       |
| ADH1B   | 0.381 | 0.2776 | 3.7602 | 0.00396 | 0.024 | -1.92 | -1.4169 | none       |
| CYP2B6  | 0.6   | 0.4056 | 3.759  | 0.00397 | 0.024 | -1.92 | -1.2076 | none       |
| CA14    | 0.567 | 0.4616 | 3.7587 | 0.00397 | 0.024 | -1.92 | -1.3442 | none       |
| ASB11   | 0.498 | 0.4061 | 3.7585 | 0.00397 | 0.024 | -1.92 | -0.989  | none       |
| TBC1D23 | 0.327 | 0.2572 | 3.7583 | 0.00397 | 0.024 | -1.92 | -0.8258 | none       |
| OLR1    | 0.686 | 0.5059 | 3.7567 | 0.00398 | 0.024 | -1.92 | -1.1954 | none       |
| PAFAH2  | 0.482 | 0.3543 | 3.756  | 0.00398 | 0.024 | -1.92 | -1.307  | none       |
| PSEN1   | 0.484 | 0.3304 | 3.7547 | 0.00399 | 0.024 | -1.92 | -0.8557 | none       |
| ICAM4   | 0.584 | 0.4219 | 3.754  | 0.004   | 0.024 | -1.93 | -1.4492 | none       |
| EIF2S3  | 0.525 | 0.3915 | 3.7533 | 0.004   | 0.024 | -1.93 | -1.4768 | none       |
| NUP155  | 0.683 | 0.5678 | 3.7532 | 0.004   | 0.024 | -1.93 | -0.9827 | none       |
| SYDE2   | 0.566 | 0.444  | 3.7527 | 0.00401 | 0.024 | -1.93 | -1.3937 | none       |
| EFR3B   | 0.55  | 0.4356 | 3.7517 | 0.00401 | 0.024 | -1.93 | -1.6175 | OA-related |
| OTUD7B  | 0.693 | 0.6377 | 3.7517 | 0.00401 | 0.024 | -1.93 | -1.427  | none       |
| CAMKMT  | 0.48  | 0.324  | 3.7511 | 0.00402 | 0.024 | -1.93 | -1.0074 | none       |
| CNTNAP1 | 0.754 | 0.4963 | 3.7502 | 0.00402 | 0.024 | -1.93 | -0.9822 | none       |
| ZCWPW2  | 0.913 | 0.6649 | 3.7501 | 0.00402 | 0.024 | -1.93 | -1.4726 | none       |
| SIPA1L1 | 1.254 | 1.1838 | 3.7496 | 0.00403 | 0.024 | -1.93 | -1.2356 | none       |
| LRRC2   | 0.484 | 0.3376 | 3.7493 | 0.00403 | 0.024 | -1.93 | -1.2067 | none       |
| HYKK    | 0.608 | 0.4207 | 3.7492 | 0.00403 | 0.024 | -1.93 | -1.5733 | OA-related |
| RRP36   | 0.678 | 0.5674 | 3.7489 | 0.00403 | 0.024 | -1.93 | -1.337  | none       |
| KLK2    | 0.866 | 0.6349 | 3.7479 | 0.00404 | 0.024 | -1.93 | -1.3917 | none       |
| CSAD    | 0.827 | 0.6501 | 3.7479 | 0.00404 | 0.024 | -1.94 | -1.5464 | OA-related |
| ADD3    | 0.634 | 0.5245 | 3.7476 | 0.00404 | 0.024 | -1.94 | -0.7711 | none       |
| NPIPB11 | 0.57  | 0.4222 | 3.7475 | 0.00404 | 0.024 | -1.94 | -1.5433 | OA-related |
| STX16   | 0.58  | 0.5057 | 3.7474 | 0.00404 | 0.024 | -1.94 | -0.3354 | none       |
| ZNF276  | 0.706 | 0.7054 | 3.7467 | 0.00404 | 0.024 | -1.94 | -0.8294 | none       |
| CHEK1   | 0.476 | 0.3047 | 3.7462 | 0.00405 | 0.024 | -1.94 | -1.2373 | none       |
| ZNF470  | 0.659 | 0.5452 | 3.7451 | 0.00406 | 0.024 | -1.94 | -1.6196 | OA-related |
| MID1IP1 | 0.49  | 0.3585 | 3.745  | 0.00406 | 0.024 | -1.94 | -1.0939 | none       |
| ZNF426  | 0.802 | 0.6799 | 3.7448 | 0.00406 | 0.024 | -1.94 | -1.4111 | none       |
| TTL10   | 0.969 | 0.7401 | 3.7445 | 0.00406 | 0.024 | -1.94 | -1.0457 | none       |
| TMEM44  | 0.849 | 0.6817 | 3.7442 | 0.00406 | 0.024 | -1.94 | -1.3428 | none       |
| PDK3    | 0.42  | 0.2473 | 3.7427 | 0.00407 | 0.024 | -1.94 | -1.2247 | none       |
| GPX8    | 0.533 | 0.4018 | 3.7418 | 0.00408 | 0.024 | -1.94 | -1.4097 | none       |
| ADTRP   | 0.407 | 0.2762 | 3.7409 | 0.00408 | 0.024 | -1.95 | -0.2492 | none       |
| ZNF850  | 0.74  | 0.6005 | 3.7407 | 0.00408 | 0.024 | -1.95 | -0.808  | none       |
| TMEM68  | 0.661 | 0.4836 | 3.7407 | 0.00408 | 0.024 | -1.95 | -0.7753 | none       |

|           |        |         |        |         |       |       |         |      |
|-----------|--------|---------|--------|---------|-------|-------|---------|------|
| ENO2      | 0.397  | 0.3128  | 3.7401 | 0.00409 | 0.024 | -1.95 | 0.35518 | none |
| MICU1     | 0.455  | 0.3452  | 3.7395 | 0.00409 | 0.024 | -1.95 | -1.375  | none |
| CECR2     | 0.449  | 0.325   | 3.7387 | 0.0041  | 0.024 | -1.95 | -0.8703 | none |
| LACTB     | 0.548  | 0.4231  | 3.7384 | 0.0041  | 0.024 | -1.95 | -0.0759 | none |
| OR8H1     | 0.431  | 0.2919  | 3.7379 | 0.0041  | 0.024 | -1.95 | -1.3048 | none |
| ANK3      | 0.703  | 0.605   | 3.7371 | 0.00411 | 0.024 | -1.95 | -1.3135 | none |
| KANSL1    | 0.78   | 0.668   | 3.7365 | 0.00411 | 0.024 | -1.95 | -1.17   | none |
| PRMT8     | 0.491  | 0.3382  | 3.7361 | 0.00411 | 0.024 | -1.95 | -1.031  | none |
| CD226     | -0.436 | -0.3467 | -3.736 | 0.00412 | 0.024 | -1.95 | 1.16927 | none |
| TIMP1     | -0.367 | -0.2852 | -3.735 | 0.00412 | 0.024 | -1.96 | 1.46016 | none |
| NT5E      | -0.558 | -0.4374 | -3.732 | 0.00414 | 0.025 | -1.96 | 2.01981 | none |
| ZBTB8OS   | 0.519  | 0.3269  | 3.7312 | 0.00415 | 0.025 | -1.96 | -1.1935 | none |
| CFAP206   | 0.448  | 0.3056  | 3.731  | 0.00415 | 0.025 | -1.96 | -1.3736 | none |
| NCOR1     | 1.198  | 1.1522  | 3.7306 | 0.00415 | 0.025 | -1.96 | -1.1664 | none |
| HMG2      | -0.282 | -0.2034 | -3.731 | 0.00415 | 0.025 | -1.96 | 0.91686 | none |
| C22ORF46  | 0.74   | 0.694   | 3.7305 | 0.00415 | 0.025 | -1.96 | -1.1264 | none |
| CDCA8     | -0.3   | -0.2109 | -3.73  | 0.00415 | 0.025 | -1.96 | 1.77358 | none |
| ESYT2     | 0.45   | 0.3592  | 3.7298 | 0.00416 | 0.025 | -1.96 | -1.444  | none |
| CCDC47    | 0.436  | 0.3623  | 3.7296 | 0.00416 | 0.025 | -1.96 | -0.9586 | none |
| FAM131A   | 0.54   | 0.3281  | 3.7288 | 0.00416 | 0.025 | -1.97 | -1.1549 | none |
| TMPRSS11  | 0.393  | 0.2929  | 3.7274 | 0.00417 | 0.025 | -1.97 | -1.0331 | none |
| BBS2      | 0.899  | 0.6856  | 3.7273 | 0.00417 | 0.025 | -1.97 | -0.8276 | none |
| FRMD1     | 0.463  | 0.3351  | 3.7257 | 0.00418 | 0.025 | -1.97 | -1.1698 | none |
| ZNF100    | 0.876  | 0.7128  | 3.7248 | 0.00419 | 0.025 | -1.97 | -1.0759 | none |
| MSL1      | 0.986  | 0.8104  | 3.7243 | 0.00419 | 0.025 | -1.97 | -1.2445 | none |
| ZNF121    | 0.812  | 0.7297  | 3.7235 | 0.0042  | 0.025 | -1.97 | -1.4251 | none |
| PARN      | 0.569  | 0.4732  | 3.7228 | 0.0042  | 0.025 | -1.98 | -0.6043 | none |
| TTC16     | 0.437  | 0.3228  | 3.7215 | 0.00421 | 0.025 | -1.98 | -1.2568 | none |
| MYH14     | 0.306  | 0.2221  | 3.7211 | 0.00422 | 0.025 | -1.98 | -1.3183 | none |
| STX1B     | 0.373  | 0.2929  | 3.7207 | 0.00422 | 0.025 | -1.98 | -1.2943 | none |
| NTRK3     | 0.684  | 0.5486  | 3.7203 | 0.00422 | 0.025 | -1.98 | -1.0564 | none |
| CAV2      | 0.683  | 0.4743  | 3.72   | 0.00422 | 0.025 | -1.98 | -1.1621 | none |
| CAMSAP1   | 0.957  | 0.9728  | 3.7198 | 0.00422 | 0.025 | -1.98 | -0.9974 | none |
| ITIH5     | 0.81   | 0.547   | 3.7197 | 0.00422 | 0.025 | -1.98 | -1.1475 | none |
| NKAP      | 0.914  | 0.8083  | 3.7192 | 0.00423 | 0.025 | -1.98 | -1.1174 | none |
| LETMD1    | 0.525  | 0.3663  | 3.7188 | 0.00423 | 0.025 | -1.98 | -0.9929 | none |
| KDM5C     | 0.955  | 0.8932  | 3.7188 | 0.00423 | 0.025 | -1.98 | -1.0998 | none |
| HIST1H2BC | 0.65   | 0.485   | 3.7181 | 0.00424 | 0.025 | -1.98 | -1.0876 | none |
| RNF10     | 0.484  | 0.3872  | 3.7179 | 0.00424 | 0.025 | -1.98 | -0.416  | none |
| ZRSR2     | 0.55   | 0.4381  | 3.7172 | 0.00424 | 0.025 | -1.98 | -1.4133 | none |

|          |        |         |        |         |       |       |         |      |
|----------|--------|---------|--------|---------|-------|-------|---------|------|
| IGFBPL1  | 0.463  | 0.3555  | 3.7163 | 0.00425 | 0.025 | -1.99 | -1.4375 | none |
| XDH      | 0.435  | 0.3215  | 3.7153 | 0.00425 | 0.025 | -1.99 | -0.9262 | none |
| SLC6A4   | 0.307  | 0.213   | 3.7149 | 0.00426 | 0.025 | -1.99 | -1.3019 | none |
| TCEANC2  | 0.697  | 0.4836  | 3.7136 | 0.00427 | 0.025 | -1.99 | -1.2472 | none |
| ZSCAN25  | 0.495  | 0.4577  | 3.7123 | 0.00428 | 0.025 | -1.99 | -0.3983 | none |
| ASPSCR1  | 0.431  | 0.3029  | 3.7119 | 0.00428 | 0.025 | -1.99 | -1.4688 | none |
| RPL3L    | 0.536  | 0.3931  | 3.7108 | 0.00429 | 0.025 | -1.99 | -0.9795 | none |
| MICALL2  | 0.421  | 0.4107  | 3.7101 | 0.00429 | 0.025 | -2    | 0.0463  | none |
| 8-Mar    | 0.739  | 0.5622  | 3.71   | 0.00429 | 0.025 | -2    | -0.9702 | none |
| TCF25    | 0.515  | 0.4398  | 3.7098 | 0.00429 | 0.025 | -2    | -1.4983 | none |
| CEACAM1  | 0.583  | 0.4861  | 3.7084 | 0.0043  | 0.025 | -2    | -0.8035 | none |
| DENND5B  | 0.478  | 0.3787  | 3.708  | 0.00431 | 0.025 | -2    | -0.8559 | none |
| C4BPA    | 1.181  | 0.9786  | 3.7078 | 0.00431 | 0.025 | -2    | -1.2916 | none |
| MTRNR2L1 | 0.717  | 0.5636  | 3.7076 | 0.00431 | 0.025 | -2    | -1.0332 | none |
| ANXA3    | 0.574  | 0.4622  | 3.7051 | 0.00433 | 0.025 | -2    | -1.0221 | none |
| SPG21    | 0.544  | 0.3386  | 3.7043 | 0.00433 | 0.025 | -2.01 | -0.901  | none |
| CREBRF   | 0.681  | 0.5857  | 3.7037 | 0.00434 | 0.025 | -2.01 | -0.7202 | none |
| ZNF101   | 0.772  | 0.6492  | 3.703  | 0.00434 | 0.025 | -2.01 | -1.491  | none |
| ERVW-1   | 0.402  | 0.3875  | 3.7025 | 0.00434 | 0.025 | -2.01 | -0.4765 | none |
| RARRES1  | 0.9    | 0.5687  | 3.7018 | 0.00435 | 0.025 | -2.01 | -1.0993 | none |
| PNKD     | -0.404 | -0.3279 | -3.701 | 0.00435 | 0.025 | -2.01 | 1.31448 | none |
| ZNF45    | 0.953  | 0.8179  | 3.7001 | 0.00436 | 0.025 | -2.01 | -1.3857 | none |
| NPIPB6   | 0.514  | 0.4489  | 3.6996 | 0.00436 | 0.025 | -2.01 | -0.6897 | none |
| CDH11    | 0.946  | 0.7308  | 3.6992 | 0.00437 | 0.025 | -2.01 | -0.919  | none |
| C4BPB    | 0.557  | 0.4299  | 3.6982 | 0.00437 | 0.025 | -2.01 | -1.0154 | none |
| CDH17    | 0.81   | 0.628   | 3.698  | 0.00438 | 0.025 | -2.02 | -1.3758 | none |
| SENP6    | 1.101  | 1.022   | 3.6978 | 0.00438 | 0.025 | -2.02 | -1.3022 | none |
| PTPN9    | 0.636  | 0.5142  | 3.6977 | 0.00438 | 0.025 | -2.02 | -1.2941 | none |
| TTC7B    | 1.188  | 1.0796  | 3.6976 | 0.00438 | 0.025 | -2.02 | -0.9931 | none |
| WDR24    | 0.386  | 0.3426  | 3.6974 | 0.00438 | 0.025 | -2.02 | -0.6367 | none |
| ITGB6    | 0.589  | 0.4432  | 3.6957 | 0.00439 | 0.026 | -2.02 | -0.9574 | none |
| TRIM41   | 0.602  | 0.5401  | 3.6947 | 0.0044  | 0.026 | -2.02 | -1.3581 | none |
| PGAM5    | 0.51   | 0.4176  | 3.6942 | 0.0044  | 0.026 | -2.02 | -1.3869 | none |
| GABRD    | 0.515  | 0.3727  | 3.6937 | 0.00441 | 0.026 | -2.02 | -1.1749 | none |
| CCNL2    | 0.6    | 0.5107  | 3.6934 | 0.00441 | 0.026 | -2.02 | -1.3014 | none |
| ALDH1B1  | 0.546  | 0.4798  | 3.6926 | 0.00441 | 0.026 | -2.02 | -0.9782 | none |
| ZNF468   | 0.723  | 0.6001  | 3.6912 | 0.00442 | 0.026 | -2.03 | -1.2424 | none |
| WIPF2    | 0.674  | 0.5199  | 3.6893 | 0.00444 | 0.026 | -2.03 | -0.986  | none |
| INSC     | 0.435  | 0.324   | 3.6892 | 0.00444 | 0.026 | -2.03 | -1.2378 | none |
| CD276    | 0.861  | 0.7235  | 3.6883 | 0.00444 | 0.026 | -2.03 | -1.213  | none |

|           |        |         |        |         |       |       |         |            |
|-----------|--------|---------|--------|---------|-------|-------|---------|------------|
| TRIM68    | 0.49   | 0.3777  | 3.6871 | 0.00445 | 0.026 | -2.03 | -1.2793 | none       |
| NPHS1     | 0.318  | 0.214   | 3.6857 | 0.00446 | 0.026 | -2.04 | -1.2549 | none       |
| USP40     | 0.675  | 0.557   | 3.6843 | 0.00447 | 0.026 | -2.04 | -0.8854 | none       |
| PRELID2   | 0.558  | 0.4336  | 3.6838 | 0.00448 | 0.026 | -2.04 | -1.1497 | none       |
| FAM149A   | 1.248  | 1.0185  | 3.6827 | 0.00449 | 0.026 | -2.04 | -1.1427 | none       |
| TMEM45A   | 0.615  | 0.4635  | 3.6826 | 0.00449 | 0.026 | -2.04 | -1.0406 | none       |
| AC124312  | 0.522  | 0.3757  | 3.6818 | 0.00449 | 0.026 | -2.04 | -1.02   | none       |
| IPO7      | 0.73   | 0.5647  | 3.6806 | 0.0045  | 0.026 | -2.04 | -0.9345 | none       |
| HIST1H2AI | 1.012  | 0.7305  | 3.6803 | 0.0045  | 0.026 | -2.04 | -0.0735 | none       |
| GCLC      | 0.576  | 0.4798  | 3.6769 | 0.00453 | 0.026 | -2.05 | -1.3982 | none       |
| MYO10     | 0.508  | 0.4122  | 3.6765 | 0.00453 | 0.026 | -2.05 | -0.7153 | none       |
| EHMT1     | 1.024  | 1.0305  | 3.6765 | 0.00453 | 0.026 | -2.05 | -0.9083 | none       |
| SOCS7     | 0.464  | 0.4012  | 3.6756 | 0.00454 | 0.026 | -2.05 | -1.3354 | none       |
| BTF3      | -0.354 | -0.3308 | -3.675 | 0.00454 | 0.026 | -2.05 | 1.64388 | none       |
| LAMC3     | 0.513  | 0.3827  | 3.6754 | 0.00454 | 0.026 | -2.05 | -1.2112 | none       |
| F2RL3     | 0.55   | 0.4176  | 3.6753 | 0.00454 | 0.026 | -2.05 | -1.5865 | OA-related |
| ZNF816    | 0.828  | 0.6691  | 3.6749 | 0.00454 | 0.026 | -2.05 | -1.5021 | none       |
| SUPV3L1   | 0.456  | 0.4044  | 3.6749 | 0.00454 | 0.026 | -2.05 | -0.0534 | none       |
| USP4      | 0.741  | 0.6735  | 3.6748 | 0.00454 | 0.026 | -2.05 | -1.3434 | none       |
| BROX      | 0.597  | 0.4663  | 3.674  | 0.00455 | 0.026 | -2.05 | -1.5589 | OA-related |
| SLC35F1   | 0.389  | 0.2726  | 3.6715 | 0.00457 | 0.026 | -2.06 | -0.5766 | none       |
| RHOB      | -0.379 | -0.291  | -3.67  | 0.00458 | 0.026 | -2.06 | 1.32121 | none       |
| SGF29     | 0.33   | 0.2945  | 3.6697 | 0.00458 | 0.026 | -2.06 | -0.3866 | none       |
| ZSWIM7    | 0.525  | 0.3018  | 3.6697 | 0.00458 | 0.026 | -2.06 | -0.9981 | none       |
| VPS13B    | 0.566  | 0.4965  | 3.6692 | 0.00458 | 0.026 | -2.06 | -1.3    | none       |
| MAPK9     | 0.638  | 0.4195  | 3.6689 | 0.00459 | 0.026 | -2.06 | -1.1283 | none       |
| AMN1      | 0.662  | 0.4359  | 3.6688 | 0.00459 | 0.026 | -2.06 | -0.921  | none       |
| ARHGEF38  | 0.701  | 0.662   | 3.6679 | 0.00459 | 0.026 | -2.06 | -0.6259 | none       |
| MAS1      | 0.296  | 0.214   | 3.6674 | 0.0046  | 0.026 | -2.06 | -1.3676 | none       |
| WDR82     | 0.313  | 0.2166  | 3.6665 | 0.0046  | 0.026 | -2.07 | -0.78   | none       |
| ZNF609    | 0.86   | 0.8546  | 3.6662 | 0.00461 | 0.026 | -2.07 | -0.9235 | none       |
| UBE4B     | 0.687  | 0.6011  | 3.664  | 0.00462 | 0.026 | -2.07 | -1.453  | none       |
| INO80C    | 0.439  | 0.3294  | 3.6638 | 0.00462 | 0.026 | -2.07 | -0.7474 | none       |
| IL13RA1   | 0.381  | 0.2883  | 3.6637 | 0.00462 | 0.026 | -2.07 | -0.9834 | none       |
| KMT5B     | 0.642  | 0.554   | 3.6622 | 0.00464 | 0.027 | -2.07 | -1.2189 | none       |
| SLC52A3   | 0.294  | 0.2182  | 3.6618 | 0.00464 | 0.027 | -2.07 | -1.3559 | none       |
| ATL1      | 0.966  | 0.6871  | 3.661  | 0.00465 | 0.027 | -2.08 | -1.1109 | none       |
| PDXDC1    | 0.653  | 0.6449  | 3.6591 | 0.00466 | 0.027 | -2.08 | -0.8834 | none       |
| TMPRSS7   | 0.33   | 0.245   | 3.6581 | 0.00467 | 0.027 | -2.08 | -1.0278 | none       |
| TRIM36    | 0.866  | 0.6721  | 3.6578 | 0.00467 | 0.027 | -2.08 | -0.8772 | none       |

|          |       |        |        |         |       |       |         |      |
|----------|-------|--------|--------|---------|-------|-------|---------|------|
| UQCC1    | 0.535 | 0.4261 | 3.6577 | 0.00467 | 0.027 | -2.08 | -1.0305 | none |
| MSH6     | 0.58  | 0.5132 | 3.6569 | 0.00468 | 0.027 | -2.08 | -0.4111 | none |
| MLLT6    | 0.803 | 0.786  | 3.6565 | 0.00468 | 0.027 | -2.08 | -0.9615 | none |
| SLC35E2B | 0.608 | 0.5327 | 3.6564 | 0.00468 | 0.027 | -2.08 | -0.3572 | none |
| RPAP2    | 0.663 | 0.5315 | 3.6559 | 0.00468 | 0.027 | -2.08 | -1.2222 | none |
| NDRG3    | 0.309 | 0.2287 | 3.6558 | 0.00468 | 0.027 | -2.08 | 0.15691 | none |
| SETD6    | 0.499 | 0.4615 | 3.6544 | 0.00469 | 0.027 | -2.09 | -1.1446 | none |
| LRRC1    | 0.458 | 0.3002 | 3.6543 | 0.0047  | 0.027 | -2.09 | -1.3788 | none |
| MYADM    | 0.605 | 0.4885 | 3.6525 | 0.00471 | 0.027 | -2.09 | -0.5739 | none |
| HCK      | 0.356 | 0.2454 | 3.6524 | 0.00471 | 0.027 | -2.09 | -1.278  | none |
| MAP3K12  | 0.729 | 0.5797 | 3.6523 | 0.00471 | 0.027 | -2.09 | -1.3581 | none |
| KIF25    | 0.614 | 0.526  | 3.6513 | 0.00472 | 0.027 | -2.09 | -0.9872 | none |
| IL17RC   | 0.769 | 0.6438 | 3.6502 | 0.00473 | 0.027 | -2.09 | -0.8838 | none |
| TTL2     | 0.352 | 0.2394 | 3.6491 | 0.00474 | 0.027 | -2.09 | -0.5833 | none |
| NLRP10   | 0.36  | 0.2472 | 3.6468 | 0.00475 | 0.027 | -2.1  | -1.2647 | none |
| GXYLT2   | 0.358 | 0.2619 | 3.6467 | 0.00475 | 0.027 | -2.1  | -1.348  | none |
| SMOX     | 0.751 | 0.7494 | 3.6464 | 0.00476 | 0.027 | -2.1  | -1.0098 | none |
| BCS1L    | 0.372 | 0.2845 | 3.6462 | 0.00476 | 0.027 | -2.1  | -0.6763 | none |
| RP1L1    | 0.543 | 0.4589 | 3.6458 | 0.00476 | 0.027 | -2.1  | -0.5839 | none |
| GAA      | 0.4   | 0.3595 | 3.6422 | 0.00479 | 0.027 | -2.11 | 0.64758 | none |
| TRIM56   | 0.798 | 0.7626 | 3.642  | 0.00479 | 0.027 | -2.11 | -1.1385 | none |
| ABCC4    | 0.955 | 0.7366 | 3.6413 | 0.0048  | 0.027 | -2.11 | -1.2918 | none |
| UBOX5    | 0.444 | 0.3507 | 3.64   | 0.00481 | 0.027 | -2.11 | -0.8105 | none |
| C15ORF53 | 1.161 | 0.9568 | 3.6387 | 0.00482 | 0.027 | -2.11 | -0.8029 | none |
| SPDYE1   | 0.979 | 0.8388 | 3.6383 | 0.00482 | 0.027 | -2.11 | -1.415  | none |
| CTH      | 0.648 | 0.4971 | 3.6382 | 0.00482 | 0.027 | -2.11 | -0.7886 | none |
| NOL6     | 0.725 | 0.6685 | 3.6377 | 0.00482 | 0.027 | -2.11 | -1.1163 | none |
| SLC26A1  | 0.7   | 0.5758 | 3.6371 | 0.00483 | 0.027 | -2.11 | 0.03944 | none |
| TWSG1    | 0.42  | 0.2924 | 3.6369 | 0.00483 | 0.027 | -2.11 | -1.2485 | none |
| RINL     | 0.8   | 0.7154 | 3.6365 | 0.00483 | 0.027 | -2.11 | -1.0083 | none |
| TMEM65   | 0.369 | 0.2249 | 3.6364 | 0.00483 | 0.027 | -2.11 | -0.7268 | none |
| ANKIB1   | 0.886 | 0.7349 | 3.6356 | 0.00484 | 0.027 | -2.12 | -1.3609 | none |
| SNAPC3   | 0.493 | 0.4004 | 3.6349 | 0.00485 | 0.027 | -2.12 | -0.4791 | none |
| CTNNA1   | 0.973 | 0.8608 | 3.6342 | 0.00485 | 0.027 | -2.12 | -1.29   | none |
| DDX11    | 0.599 | 0.6116 | 3.634  | 0.00485 | 0.027 | -2.12 | -0.6086 | none |
| CAPN12   | 0.99  | 0.7761 | 3.6334 | 0.00486 | 0.027 | -2.12 | -0.8561 | none |
| MC1R     | 0.42  | 0.3085 | 3.6322 | 0.00487 | 0.027 | -2.12 | -0.8509 | none |
| WFDC8    | 0.754 | 0.5107 | 3.6321 | 0.00487 | 0.027 | -2.12 | -1.3851 | none |
| TFIP11   | 0.716 | 0.654  | 3.6314 | 0.00487 | 0.027 | -2.12 | -0.4731 | none |
| IL7R     | 0.971 | 0.7866 | 3.6313 | 0.00487 | 0.027 | -2.12 | -1.2537 | none |

|          |        |         |        |         |       |       |         |            |
|----------|--------|---------|--------|---------|-------|-------|---------|------------|
| IFI30    | -0.433 | -0.3991 | -3.631 | 0.00487 | 0.027 | -2.12 | 2.09932 | AA-related |
| PLK5     | 0.441  | 0.3197  | 3.6307 | 0.00488 | 0.027 | -2.12 | -1.4091 | none       |
| ASCC2    | 0.722  | 0.6907  | 3.6301 | 0.00488 | 0.027 | -2.13 | -0.9653 | none       |
| TPGS1    | 0.331  | 0.1806  | 3.6297 | 0.00489 | 0.028 | -2.13 | -1.0148 | none       |
| SAA2     | 0.726  | 0.632   | 3.6291 | 0.00489 | 0.028 | -2.13 | -1.3588 | none       |
| GOLGA3   | 0.745  | 0.6439  | 3.6285 | 0.0049  | 0.028 | -2.13 | -1.2502 | none       |
| CLMN     | 0.394  | 0.3089  | 3.6284 | 0.0049  | 0.028 | -2.13 | -1.5498 | OA-related |
| MAPK12   | 0.61   | 0.4884  | 3.6282 | 0.0049  | 0.028 | -2.13 | -1.3523 | none       |
| SRCAP    | 1.042  | 1.0071  | 3.6279 | 0.0049  | 0.028 | -2.13 | -0.8069 | none       |
| UBAP1L   | 0.443  | 0.3826  | 3.6277 | 0.0049  | 0.028 | -2.13 | -0.8573 | none       |
| CCDC60   | 0.896  | 0.7124  | 3.6275 | 0.0049  | 0.028 | -2.13 | -1.3024 | none       |
| STK3     | 0.926  | 0.7703  | 3.6264 | 0.00491 | 0.028 | -2.13 | -0.7745 | none       |
| ERMN     | 0.636  | 0.4962  | 3.6261 | 0.00492 | 0.028 | -2.13 | -1.2265 | none       |
| DDB1     | 0.402  | 0.2916  | 3.6255 | 0.00492 | 0.028 | -2.13 | -0.7493 | none       |
| TMEM106  | 0.614  | 0.4946  | 3.6249 | 0.00493 | 0.028 | -2.13 | -0.8386 | none       |
| ANKDD1A  | 0.501  | 0.4106  | 3.6242 | 0.00493 | 0.028 | -2.13 | -1.4884 | none       |
| CCR4     | 0.757  | 0.6309  | 3.623  | 0.00494 | 0.028 | -2.14 | -1.3594 | none       |
| RNF43    | 0.354  | 0.2947  | 3.6218 | 0.00495 | 0.028 | -2.14 | -1.2933 | none       |
| CD82     | 0.403  | 0.35    | 3.6217 | 0.00495 | 0.028 | -2.14 | -0.9043 | none       |
| ACP2     | 0.399  | 0.309   | 3.6212 | 0.00495 | 0.028 | -2.14 | -1.0764 | none       |
| SNAPC1   | 0.396  | 0.3005  | 3.6205 | 0.00496 | 0.028 | -2.14 | -1.1225 | none       |
| RGS9     | 0.453  | 0.3031  | 3.6205 | 0.00496 | 0.028 | -2.14 | -1.3238 | none       |
| HOOK3    | 0.97   | 0.8092  | 3.6204 | 0.00496 | 0.028 | -2.14 | -1.4118 | none       |
| MISP     | 0.874  | 0.6564  | 3.6198 | 0.00497 | 0.028 | -2.14 | -1.0187 | none       |
| ZFPM2    | 0.652  | 0.5196  | 3.6195 | 0.00497 | 0.028 | -2.14 | -1.2076 | none       |
| TMEM150  | 0.627  | 0.496   | 3.618  | 0.00498 | 0.028 | -2.14 | -1.1711 | none       |
| CHRN4    | 0.423  | 0.2916  | 3.6172 | 0.00499 | 0.028 | -2.15 | -0.719  | none       |
| GNB4     | 0.62   | 0.4131  | 3.6159 | 0.005   | 0.028 | -2.15 | -0.3066 | none       |
| FAM227A  | 0.479  | 0.342   | 3.6156 | 0.005   | 0.028 | -2.15 | -1.5247 | none       |
| TBC1D22A | 0.594  | 0.4855  | 3.6155 | 0.005   | 0.028 | -2.15 | -1.268  | none       |
| LDLRAD3  | 0.598  | 0.4736  | 3.6138 | 0.00501 | 0.028 | -2.15 | -1.1686 | none       |
| SCARB1   | 0.468  | 0.4787  | 3.6134 | 0.00502 | 0.028 | -2.15 | 1.14553 | none       |
| SMTNL1   | 0.509  | 0.3932  | 3.6133 | 0.00502 | 0.028 | -2.15 | -1.4037 | none       |
| ZCCHC8   | 0.655  | 0.5835  | 3.6128 | 0.00502 | 0.028 | -2.15 | -0.908  | none       |
| 1-Dec    | 0.545  | 0.4307  | 3.6126 | 0.00502 | 0.028 | -2.15 | -1.2176 | none       |
| SERPIN5  | 0.483  | 0.3912  | 3.6126 | 0.00502 | 0.028 | -2.15 | -0.4282 | none       |
| MRVI1    | 0.832  | 0.617   | 3.6114 | 0.00503 | 0.028 | -2.16 | -1.1227 | none       |
| FUT4     | 0.422  | 0.2932  | 3.6102 | 0.00504 | 0.028 | -2.16 | -1.5379 | OA-related |
| PROS1    | 0.586  | 0.3839  | 3.6102 | 0.00504 | 0.028 | -2.16 | -1.1533 | none       |
| ZNF696   | 0.58   | 0.4725  | 3.6096 | 0.00505 | 0.028 | -2.16 | -0.5549 | none       |

|          |        |         |        |         |       |       |         |            |
|----------|--------|---------|--------|---------|-------|-------|---------|------------|
| MARVELD: | 0.402  | 0.31    | 3.6089 | 0.00506 | 0.028 | -2.16 | -1.3729 | none       |
| ZBTB3    | 0.957  | 0.7016  | 3.6088 | 0.00506 | 0.028 | -2.16 | -1.1457 | none       |
| ZNF98    | 0.746  | 0.5316  | 3.6086 | 0.00506 | 0.028 | -2.16 | -1.3123 | none       |
| INPP5K   | 0.335  | 0.2296  | 3.6083 | 0.00506 | 0.028 | -2.16 | -0.0148 | none       |
| NEK2     | 0.357  | 0.2202  | 3.6077 | 0.00507 | 0.028 | -2.16 | -1.0918 | none       |
| DNAJC28  | 0.326  | 0.2298  | 3.6074 | 0.00507 | 0.028 | -2.16 | -1.4315 | none       |
| KPNA1    | 0.29   | 0.2105  | 3.6072 | 0.00507 | 0.028 | -2.16 | 0.04489 | none       |
| MIS18A   | -0.446 | -0.3627 | -3.607 | 0.00507 | 0.028 | -2.16 | 2.00124 | none       |
| SUMO3    | 0.519  | 0.3401  | 3.606  | 0.00508 | 0.028 | -2.16 | -0.8536 | none       |
| AP5S1    | 0.405  | 0.3109  | 3.6042 | 0.00509 | 0.028 | -2.17 | -1.1475 | none       |
| PARP6    | 0.532  | 0.5529  | 3.6035 | 0.0051  | 0.028 | -2.17 | -0.2923 | none       |
| HAPLN4   | 0.449  | 0.3381  | 3.5994 | 0.00513 | 0.028 | -2.17 | -1.0912 | none       |
| FANCD2   | 0.622  | 0.6002  | 3.5993 | 0.00513 | 0.028 | -2.18 | -1.0899 | none       |
| NPL      | 0.743  | 0.5432  | 3.5992 | 0.00514 | 0.028 | -2.18 | -0.8229 | none       |
| WSB1     | 0.353  | 0.228   | 3.5984 | 0.00514 | 0.028 | -2.18 | -0.4434 | none       |
| EPHB2    | 0.373  | 0.2962  | 3.5981 | 0.00514 | 0.028 | -2.18 | -0.7792 | none       |
| TRIML2   | 1.054  | 0.8823  | 3.5975 | 0.00515 | 0.028 | -2.18 | -1.2792 | none       |
| RGMA     | 0.335  | 0.2427  | 3.5975 | 0.00515 | 0.028 | -2.18 | -1.4109 | none       |
| CHP1     | 0.532  | 0.336   | 3.5973 | 0.00515 | 0.028 | -2.18 | -1.4714 | none       |
| ANKRD42  | 0.429  | 0.3283  | 3.5968 | 0.00516 | 0.028 | -2.18 | -1.1521 | none       |
| ZNF254   | 0.707  | 0.5125  | 3.5967 | 0.00516 | 0.028 | -2.18 | -0.9818 | none       |
| RRAS2    | 0.419  | 0.3239  | 3.5962 | 0.00516 | 0.028 | -2.18 | -0.9086 | none       |
| FOCAD    | 0.889  | 0.5936  | 3.5959 | 0.00516 | 0.028 | -2.18 | -1.134  | none       |
| MIEF2    | 0.378  | 0.2128  | 3.5958 | 0.00516 | 0.028 | -2.18 | -0.4884 | none       |
| NLRP8    | 0.377  | 0.2709  | 3.5948 | 0.00517 | 0.029 | -2.18 | -1.2857 | none       |
| TAOK1    | 1.026  | 0.9884  | 3.5947 | 0.00517 | 0.029 | -2.18 | -0.9637 | none       |
| CLASRP   | 0.671  | 0.7174  | 3.5945 | 0.00517 | 0.029 | -2.18 | 0.1255  | none       |
| POU5F1B  | 0.436  | 0.3124  | 3.594  | 0.00518 | 0.029 | -2.18 | -1.3333 | none       |
| NONO     | 0.59   | 0.4894  | 3.5932 | 0.00519 | 0.029 | -2.18 | -1.1671 | none       |
| SLCO3A1  | 0.522  | 0.3904  | 3.5931 | 0.00519 | 0.029 | -2.19 | -0.891  | none       |
| STAG2    | 0.877  | 0.7498  | 3.5926 | 0.00519 | 0.029 | -2.19 | -1.3994 | none       |
| RCSD1    | 0.574  | 0.4756  | 3.5923 | 0.00519 | 0.029 | -2.19 | -0.4906 | none       |
| TIGD1    | 0.371  | 0.3469  | 3.5917 | 0.0052  | 0.029 | -2.19 | -0.8626 | none       |
| CORO2A   | 0.589  | 0.4934  | 3.591  | 0.0052  | 0.029 | -2.19 | -1.5508 | OA-related |
| ZNF496   | 0.522  | 0.4842  | 3.5905 | 0.00521 | 0.029 | -2.19 | -0.2697 | none       |
| VPS18    | 0.393  | 0.3504  | 3.5899 | 0.00521 | 0.029 | -2.19 | -1.3039 | none       |
| TAB2     | 0.976  | 0.9018  | 3.5897 | 0.00522 | 0.029 | -2.19 | -1.3195 | none       |
| MYH10    | 0.782  | 0.7512  | 3.589  | 0.00522 | 0.029 | -2.19 | -0.3737 | none       |
| DCTN6    | 0.517  | 0.2948  | 3.588  | 0.00523 | 0.029 | -2.19 | -0.9004 | none       |
| SH3TC2   | 0.367  | 0.2643  | 3.588  | 0.00523 | 0.029 | -2.19 | -0.5346 | none       |



|          |       |        |        |         |       |       |         |      |
|----------|-------|--------|--------|---------|-------|-------|---------|------|
| TCEANC   | 0.817 | 0.6276 | 3.5872 | 0.00524 | 0.029 | -2.19 | -1.1398 | none |
| TMOD3    | 0.581 | 0.4656 | 3.5864 | 0.00524 | 0.029 | -2.2  | -0.7101 | none |
| MDM4     | 0.497 | 0.4065 | 3.5862 | 0.00525 | 0.029 | -2.2  | -1.0362 | none |
| IFFO1    | 0.472 | 0.4136 | 3.5861 | 0.00525 | 0.029 | -2.2  | -0.6117 | none |
| DMKN     | 0.439 | 0.3701 | 3.5859 | 0.00525 | 0.029 | -2.2  | -0.8445 | none |
| CCDC84   | 0.569 | 0.4148 | 3.5858 | 0.00525 | 0.029 | -2.2  | -1.316  | none |
| TAF6     | 0.606 | 0.5164 | 3.5857 | 0.00525 | 0.029 | -2.2  | -0.8409 | none |
| MAN2C1   | 0.531 | 0.4927 | 3.5834 | 0.00527 | 0.029 | -2.2  | -0.9196 | none |
| SNX22    | 0.522 | 0.3941 | 3.5833 | 0.00527 | 0.029 | -2.2  | -1.4914 | none |
| SYNJ2BP  | 0.484 | 0.3045 | 3.5811 | 0.00529 | 0.029 | -2.2  | -1.1099 | none |
| ZNF292   | 0.74  | 0.7199 | 3.5806 | 0.00529 | 0.029 | -2.21 | -1.1611 | none |
| DGKA     | 0.589 | 0.5239 | 3.58   | 0.0053  | 0.029 | -2.21 | -0.8047 | none |
| PLOD3    | 0.492 | 0.378  | 3.5795 | 0.0053  | 0.029 | -2.21 | -1.4053 | none |
| PALM2    | 0.31  | 0.2573 | 3.5791 | 0.00531 | 0.029 | -2.21 | -1.1216 | none |
| HIVEP1   | 0.817 | 0.7382 | 3.5788 | 0.00531 | 0.029 | -2.21 | -1.2387 | none |
| STAT2    | 0.64  | 0.5299 | 3.5784 | 0.00531 | 0.029 | -2.21 | -1.3867 | none |
| TMIGD2   | 0.601 | 0.4432 | 3.5775 | 0.00532 | 0.029 | -2.21 | -0.6337 | none |
| KIAA0513 | 0.587 | 0.5307 | 3.577  | 0.00532 | 0.029 | -2.21 | -1.4917 | none |
| RPGRIP1L | 0.658 | 0.5037 | 3.5763 | 0.00533 | 0.029 | -2.21 | -1.1213 | none |
| MAK16    | 0.668 | 0.5764 | 3.5749 | 0.00534 | 0.029 | -2.21 | -0.877  | none |
| TM2D1    | 0.559 | 0.3587 | 3.5727 | 0.00536 | 0.029 | -2.22 | -1.0944 | none |
| IL17D    | 0.502 | 0.3894 | 3.5719 | 0.00537 | 0.029 | -2.22 | -0.9023 | none |
| TONSL    | 0.555 | 0.5048 | 3.5699 | 0.00539 | 0.029 | -2.22 | -0.7023 | none |
| IGFL4    | 0.5   | 0.3804 | 3.5677 | 0.00541 | 0.029 | -2.23 | -0.0876 | none |
| LIMS1    | 0.306 | 0.2094 | 3.5676 | 0.00541 | 0.029 | -2.23 | -0.3344 | none |
| SOWAHC   | 0.419 | 0.3697 | 3.5675 | 0.00541 | 0.029 | -2.23 | -1.3714 | none |
| MYT1     | 0.336 | 0.2679 | 3.5657 | 0.00542 | 0.03  | -2.23 | -0.8945 | none |
| BTRC     | 0.514 | 0.3405 | 3.5654 | 0.00543 | 0.03  | -2.23 | -0.1245 | none |
| RFTN2    | 0.48  | 0.3762 | 3.5635 | 0.00544 | 0.03  | -2.23 | -1.4745 | none |
| MRS2     | 0.428 | 0.285  | 3.5624 | 0.00545 | 0.03  | -2.23 | -0.9265 | none |
| GINS1    | 0.38  | 0.2647 | 3.562  | 0.00546 | 0.03  | -2.24 | -1.1732 | none |
| POLR2B   | 0.516 | 0.4053 | 3.5619 | 0.00546 | 0.03  | -2.24 | -1.3908 | none |
| FOXK2    | 0.871 | 0.8176 | 3.5612 | 0.00546 | 0.03  | -2.24 | -0.9148 | none |
| USP10    | 0.535 | 0.448  | 3.5603 | 0.00547 | 0.03  | -2.24 | -0.3137 | none |
| ORC2     | 0.457 | 0.4054 | 3.5602 | 0.00547 | 0.03  | -2.24 | -0.7055 | none |
| SAMD3    | 0.68  | 0.5827 | 3.5598 | 0.00548 | 0.03  | -2.24 | -0.3742 | none |
| C7       | 0.437 | 0.3026 | 3.5592 | 0.00548 | 0.03  | -2.24 | -1.2276 | none |
| MEGF11   | 0.36  | 0.2524 | 3.5587 | 0.00549 | 0.03  | -2.24 | -1.0858 | none |
| ZFYVE16  | 0.67  | 0.59   | 3.5572 | 0.0055  | 0.03  | -2.24 | -0.0805 | none |
| USP53    | 0.924 | 0.808  | 3.5571 | 0.0055  | 0.03  | -2.24 | -0.8777 | none |

|          |        |         |        |         |       |       |         |            |
|----------|--------|---------|--------|---------|-------|-------|---------|------------|
| ERN2     | 0.687  | 0.4458  | 3.5564 | 0.00551 | 0.03  | -2.24 | -0.8291 | none       |
| U2AF1L5  | -0.317 | -0.2306 | -3.556 | 0.00551 | 0.03  | -2.25 | 1.41339 | none       |
| ZDHHC21  | 0.611  | 0.4299  | 3.5554 | 0.00552 | 0.03  | -2.25 | -0.726  | none       |
| ZNF471   | 0.345  | 0.2706  | 3.5552 | 0.00552 | 0.03  | -2.25 | -0.9764 | none       |
| TGM2     | 0.474  | 0.3737  | 3.5549 | 0.00552 | 0.03  | -2.25 | -1.0788 | none       |
| WDR45    | 0.48   | 0.3247  | 3.5548 | 0.00552 | 0.03  | -2.25 | -1.0909 | none       |
| SRGAP2C  | 0.577  | 0.5093  | 3.5547 | 0.00552 | 0.03  | -2.25 | -1.1071 | none       |
| REPS2    | 0.313  | 0.2195  | 3.5541 | 0.00553 | 0.03  | -2.25 | -1.2974 | none       |
| TP53     | 0.448  | 0.331   | 3.5529 | 0.00554 | 0.03  | -2.25 | -1.511  | none       |
| FBXL2    | 0.491  | 0.3276  | 3.5529 | 0.00554 | 0.03  | -2.25 | -1.1746 | none       |
| IDE      | 0.615  | 0.5537  | 3.5527 | 0.00554 | 0.03  | -2.25 | -1.0618 | none       |
| CCDC90B  | 0.395  | 0.2401  | 3.5523 | 0.00554 | 0.03  | -2.25 | -1.005  | none       |
| KNTC1    | 0.737  | 0.6413  | 3.5518 | 0.00555 | 0.03  | -2.25 | -1.4509 | none       |
| ACVRL1   | 0.507  | 0.4735  | 3.5511 | 0.00555 | 0.03  | -2.25 | 0.26937 | none       |
| MTG2     | 0.559  | 0.4773  | 3.5508 | 0.00556 | 0.03  | -2.25 | -1.1721 | none       |
| NF2      | 0.737  | 0.6583  | 3.5505 | 0.00556 | 0.03  | -2.25 | -1.502  | none       |
| RNF168   | 0.7    | 0.6452  | 3.5502 | 0.00556 | 0.03  | -2.25 | -1.346  | none       |
| TRIM66   | 0.856  | 0.8199  | 3.5491 | 0.00557 | 0.03  | -2.26 | -0.548  | none       |
| HNRNPA1  | -0.276 | -0.2371 | -3.547 | 0.00559 | 0.03  | -2.26 | 1.88162 | none       |
| CLDN15   | 0.63   | 0.543   | 3.5473 | 0.00559 | 0.03  | -2.26 | -0.8258 | none       |
| DBN1     | 0.46   | 0.3497  | 3.5472 | 0.00559 | 0.03  | -2.26 | -0.2761 | none       |
| SLAMF6   | 0.405  | 0.2917  | 3.5465 | 0.0056  | 0.03  | -2.26 | -1.1245 | none       |
| TPCN1    | 0.663  | 0.5906  | 3.5448 | 0.00561 | 0.03  | -2.26 | -0.8611 | none       |
| TMEM185  | 0.42   | 0.3068  | 3.5437 | 0.00562 | 0.03  | -2.27 | -1.0575 | none       |
| ACER1    | 0.72   | 0.538   | 3.5435 | 0.00562 | 0.03  | -2.27 | -0.6429 | none       |
| SLC30A2  | 0.548  | 0.3954  | 3.5429 | 0.00563 | 0.03  | -2.27 | -1.5848 | OA-related |
| MED25    | 0.438  | 0.438   | 3.5429 | 0.00563 | 0.03  | -2.27 | -0.657  | none       |
| KLHL36   | 0.462  | 0.3865  | 3.5426 | 0.00563 | 0.03  | -2.27 | -0.8331 | none       |
| TMPRSS3  | 0.465  | 0.36    | 3.5424 | 0.00563 | 0.03  | -2.27 | -0.9555 | none       |
| ISY1     | 0.309  | 0.2245  | 3.5416 | 0.00564 | 0.03  | -2.27 | -1.2267 | none       |
| IRAK1BP1 | 0.482  | 0.3657  | 3.5407 | 0.00565 | 0.03  | -2.27 | -0.7201 | none       |
| FLVCR1   | 0.431  | 0.2854  | 3.5392 | 0.00566 | 0.03  | -2.27 | -0.5945 | none       |
| MEN1     | 0.66   | 0.5905  | 3.5352 | 0.0057  | 0.031 | -2.28 | -0.8163 | none       |
| CGNL1    | 0.424  | 0.3811  | 3.5348 | 0.0057  | 0.031 | -2.28 | -0.6756 | none       |
| PTCD1    | 0.664  | 0.6649  | 3.5344 | 0.00571 | 0.031 | -2.28 | -1.0349 | none       |
| CHD1L    | 0.385  | 0.3239  | 3.534  | 0.00571 | 0.031 | -2.28 | 0.08662 | none       |
| SLC39A14 | 0.512  | 0.4201  | 3.5338 | 0.00571 | 0.031 | -2.28 | -0.3338 | none       |
| RUFY1    | 0.805  | 0.7143  | 3.5338 | 0.00571 | 0.031 | -2.28 | -1.2475 | none       |
| LMBR1L   | 0.681  | 0.4931  | 3.5333 | 0.00572 | 0.031 | -2.28 | -0.9959 | none       |
| SCHIP1   | 0.888  | 0.6535  | 3.5324 | 0.00573 | 0.031 | -2.28 | -1.1432 | none       |

|          |        |         |        |         |       |       |         |            |
|----------|--------|---------|--------|---------|-------|-------|---------|------------|
| URB1     | 0.719  | 0.6971  | 3.5324 | 0.00573 | 0.031 | -2.28 | -0.9657 | none       |
| FLCN     | 0.638  | 0.5063  | 3.5308 | 0.00574 | 0.031 | -2.29 | -1.3016 | none       |
| CYTIP    | -0.411 | -0.4015 | -3.53  | 0.00575 | 0.031 | -2.29 | 1.92361 | none       |
| LZIC     | 0.423  | 0.2656  | 3.5302 | 0.00575 | 0.031 | -2.29 | -0.8034 | none       |
| NCF1     | 0.835  | 0.7192  | 3.5301 | 0.00575 | 0.031 | -2.29 | -0.6793 | none       |
| DISC1    | 0.713  | 0.5509  | 3.5294 | 0.00575 | 0.031 | -2.29 | -1.5979 | OA-related |
| KSR1     | 0.767  | 0.7174  | 3.5289 | 0.00576 | 0.031 | -2.29 | -1.1021 | none       |
| WDR5B    | 0.463  | 0.3373  | 3.5279 | 0.00577 | 0.031 | -2.29 | -0.5688 | none       |
| MAU2     | 0.633  | 0.6068  | 3.5276 | 0.00577 | 0.031 | -2.29 | -0.175  | none       |
| ZRANB3   | 0.536  | 0.3734  | 3.527  | 0.00578 | 0.031 | -2.29 | -0.8285 | none       |
| VIL1     | 0.403  | 0.3502  | 3.5269 | 0.00578 | 0.031 | -2.29 | -1.029  | none       |
| PRSS53   | 0.344  | 0.2776  | 3.526  | 0.00579 | 0.031 | -2.29 | -0.3056 | none       |
| TULP4    | 0.918  | 0.8095  | 3.5255 | 0.00579 | 0.031 | -2.29 | -0.9794 | none       |
| CATSPERB | 0.716  | 0.5427  | 3.5238 | 0.00581 | 0.031 | -2.3  | -0.3848 | none       |
| DHRS7B   | 0.378  | 0.2531  | 3.5238 | 0.00581 | 0.031 | -2.3  | -1.0787 | none       |
| SELENBP1 | 0.426  | 0.261   | 3.523  | 0.00581 | 0.031 | -2.3  | -0.5677 | none       |
| RHPN2    | 0.533  | 0.3896  | 3.5208 | 0.00584 | 0.031 | -2.3  | -0.512  | none       |
| REL      | 0.86   | 0.8273  | 3.5203 | 0.00584 | 0.031 | -2.3  | -1.22   | none       |
| DENND4B  | 0.666  | 0.6414  | 3.52   | 0.00584 | 0.031 | -2.3  | -1.1263 | none       |
| HMCN2    | 0.408  | 0.2795  | 3.519  | 0.00585 | 0.031 | -2.31 | -0.9716 | none       |
| CENPL    | 0.345  | 0.1976  | 3.518  | 0.00586 | 0.031 | -2.31 | -1.3387 | none       |
| DCUN1D2  | 0.81   | 0.6887  | 3.518  | 0.00586 | 0.031 | -2.31 | -0.8001 | none       |
| PLS1     | 0.611  | 0.4854  | 3.5177 | 0.00587 | 0.031 | -2.31 | -0.3514 | none       |
| RGPD5    | 0.803  | 0.6596  | 3.5176 | 0.00587 | 0.031 | -2.31 | -0.9261 | none       |
| C17ORF51 | 0.57   | 0.4409  | 3.5176 | 0.00587 | 0.031 | -2.31 | -1.2538 | none       |
| LRG1     | 0.697  | 0.5701  | 3.5168 | 0.00587 | 0.031 | -2.31 | -1.4588 | none       |
| GATM     | 0.619  | 0.4374  | 3.5168 | 0.00587 | 0.031 | -2.31 | -0.7639 | none       |
| ITPR1    | 0.603  | 0.552   | 3.5159 | 0.00588 | 0.031 | -2.31 | -0.9983 | none       |
| FOXP1    | 0.772  | 0.696   | 3.5155 | 0.00589 | 0.031 | -2.31 | -1.4151 | none       |
| TPI1     | -0.357 | -0.2653 | -3.514 | 0.0059  | 0.031 | -2.31 | 1.84854 | none       |
| MAMLD1   | 0.826  | 0.6369  | 3.511  | 0.00593 | 0.031 | -2.32 | -1.0373 | none       |
| CLIC1    | -0.379 | -0.319  | -3.511 | 0.00594 | 0.031 | -2.32 | 2.21923 | AA-related |
| TM4SF18  | 0.721  | 0.5079  | 3.5093 | 0.00595 | 0.031 | -2.32 | -1.2747 | none       |
| CBS      | 0.502  | 0.3355  | 3.5089 | 0.00595 | 0.031 | -2.32 | -0.5283 | none       |
| EEF1A1   | -0.428 | -0.4046 | -3.509 | 0.00595 | 0.031 | -2.32 | 1.40704 | none       |
| DAP3     | 0.248  | 0.128   | 3.5077 | 0.00596 | 0.032 | -2.32 | -0.766  | none       |
| C16ORF58 | 0.393  | 0.3603  | 3.5075 | 0.00596 | 0.032 | -2.32 | -0.7693 | none       |
| DPF1     | 0.415  | 0.2858  | 3.5074 | 0.00597 | 0.032 | -2.32 | -1.3754 | none       |
| PPARD    | 0.561  | 0.5121  | 3.5069 | 0.00597 | 0.032 | -2.33 | -1.305  | none       |
| FAM234B  | 0.421  | 0.3234  | 3.5066 | 0.00597 | 0.032 | -2.33 | -1.3143 | none       |

|          |        |         |        |         |       |       |         |            |
|----------|--------|---------|--------|---------|-------|-------|---------|------------|
| MACROD2  | 0.558  | 0.4475  | 3.5064 | 0.00598 | 0.032 | -2.33 | -0.9775 | none       |
| CPA4     | 0.543  | 0.4335  | 3.5064 | 0.00598 | 0.032 | -2.33 | -1.1546 | none       |
| MPP5     | 0.687  | 0.5755  | 3.5063 | 0.00598 | 0.032 | -2.33 | -0.6931 | none       |
| STX2     | 0.706  | 0.5608  | 3.5056 | 0.00598 | 0.032 | -2.33 | -0.7401 | none       |
| OR5A1    | 0.274  | 0.1973  | 3.5055 | 0.00598 | 0.032 | -2.33 | -1.5245 | none       |
| TFEB     | 0.517  | 0.4485  | 3.5032 | 0.00601 | 0.032 | -2.33 | 0.11422 | none       |
| CCDC7    | 0.553  | 0.4224  | 3.503  | 0.00601 | 0.032 | -2.33 | 0.2125  | none       |
| GAS7     | 0.372  | 0.2666  | 3.5027 | 0.00601 | 0.032 | -2.33 | -0.5357 | none       |
| BTBD18   | 0.275  | 0.2347  | 3.5023 | 0.00602 | 0.032 | -2.33 | -0.7617 | none       |
| SKP1     | -0.375 | -0.367  | -3.501 | 0.00603 | 0.032 | -2.33 | 1.95626 | none       |
| MCM4     | 0.837  | 0.7627  | 3.5012 | 0.00603 | 0.032 | -2.33 | -0.6333 | none       |
| HERC6    | 0.554  | 0.4793  | 3.4982 | 0.00606 | 0.032 | -2.34 | -0.2437 | none       |
| TYR      | 0.456  | 0.2933  | 3.4979 | 0.00606 | 0.032 | -2.34 | -0.9817 | none       |
| GRB2     | 0.35   | 0.275   | 3.4977 | 0.00606 | 0.032 | -2.34 | -1.269  | none       |
| SPIB     | 0.598  | 0.4028  | 3.4973 | 0.00606 | 0.032 | -2.34 | -1.3857 | none       |
| ZNF124   | 0.488  | 0.3642  | 3.4968 | 0.00607 | 0.032 | -2.34 | -0.8937 | none       |
| PFDN6    | -0.303 | -0.2302 | -3.497 | 0.00607 | 0.032 | -2.34 | 2.14829 | AA-related |
| ERI1     | 0.389  | 0.2938  | 3.4961 | 0.00608 | 0.032 | -2.34 | -0.6509 | none       |
| ST7L     | 0.89   | 0.7186  | 3.4959 | 0.00608 | 0.032 | -2.34 | -0.6344 | none       |
| ZNF540   | 0.478  | 0.3517  | 3.4938 | 0.0061  | 0.032 | -2.35 | -0.7397 | none       |
| FASTKD1  | 0.401  | 0.276   | 3.4922 | 0.00612 | 0.032 | -2.35 | 0.27409 | none       |
| SCN1A    | 0.427  | 0.3032  | 3.4903 | 0.00614 | 0.032 | -2.35 | -1.2217 | none       |
| 6-Mar    | 0.436  | 0.2987  | 3.4891 | 0.00615 | 0.032 | -2.35 | -1.3491 | none       |
| GSPT1    | 0.526  | 0.4456  | 3.4884 | 0.00615 | 0.032 | -2.36 | -1.3095 | none       |
| KCTD18   | 0.488  | 0.3462  | 3.4879 | 0.00616 | 0.032 | -2.36 | -1.1702 | none       |
| GGA2     | 0.567  | 0.5012  | 3.4878 | 0.00616 | 0.032 | -2.36 | -0.6189 | none       |
| PPP1R15B | 0.37   | 0.3069  | 3.4878 | 0.00616 | 0.032 | -2.36 | -1.0777 | none       |
| PACSIN2  | 0.931  | 0.8511  | 3.4877 | 0.00616 | 0.032 | -2.36 | -1.1829 | none       |
| SLC30A7  | 0.592  | 0.4108  | 3.4876 | 0.00616 | 0.032 | -2.36 | -1.309  | none       |
| GFPT1    | 0.363  | 0.2269  | 3.4861 | 0.00618 | 0.032 | -2.36 | -1.2041 | none       |
| METTL22  | 0.35   | 0.2928  | 3.4855 | 0.00618 | 0.032 | -2.36 | -0.6772 | none       |
| ASAH1    | 0.373  | 0.199   | 3.4849 | 0.00619 | 0.032 | -2.36 | -0.2135 | none       |
| PDE4DIP  | 0.747  | 0.6969  | 3.4847 | 0.00619 | 0.032 | -2.36 | -1.1041 | none       |
| RUFY2    | 0.721  | 0.6184  | 3.484  | 0.0062  | 0.032 | -2.36 | -0.8822 | none       |
| MAP3K13  | 0.275  | 0.1384  | 3.4835 | 0.0062  | 0.032 | -2.36 | -0.4304 | none       |
| KLRD1    | 0.576  | 0.4458  | 3.4825 | 0.00621 | 0.032 | -2.37 | -0.8622 | none       |
| PRDX1    | -0.483 | -0.4588 | -3.483 | 0.00621 | 0.032 | -2.37 | 2.33016 | AA-related |
| ARRDC3   | 0.508  | 0.3183  | 3.4816 | 0.00622 | 0.032 | -2.37 | -1.0004 | none       |
| ESPL1    | 0.643  | 0.6392  | 3.4814 | 0.00623 | 0.032 | -2.37 | -1.0376 | none       |
| TROAP    | 0.364  | 0.299   | 3.4808 | 0.00623 | 0.033 | -2.37 | -1.3587 | none       |

|          |        |         |        |         |       |       |         |      |
|----------|--------|---------|--------|---------|-------|-------|---------|------|
| TTN      | 0.466  | 0.3086  | 3.4801 | 0.00624 | 0.033 | -2.37 | 0.0301  | none |
| LRRFIP1  | 1.099  | 1.0377  | 3.4798 | 0.00624 | 0.033 | -2.37 | -1.1016 | none |
| ACP7     | 0.454  | 0.3042  | 3.4795 | 0.00624 | 0.033 | -2.37 | -1.1359 | none |
| SLC23A3  | 0.51   | 0.4518  | 3.4791 | 0.00625 | 0.033 | -2.37 | -0.353  | none |
| SMARCB1  | 0.839  | 0.6759  | 3.4784 | 0.00626 | 0.033 | -2.37 | -1.181  | none |
| ZNF718   | 0.412  | 0.2836  | 3.4776 | 0.00626 | 0.033 | -2.37 | -1.0849 | none |
| UGT8     | 0.42   | 0.3012  | 3.4764 | 0.00628 | 0.033 | -2.38 | -1.3255 | none |
| TNFSF14  | 0.815  | 0.7418  | 3.4741 | 0.0063  | 0.033 | -2.38 | -1.0588 | none |
| RCOR3    | 0.512  | 0.4323  | 3.4728 | 0.00631 | 0.033 | -2.38 | -1.2832 | none |
| ZBED1    | 0.67   | 0.5752  | 3.4712 | 0.00633 | 0.033 | -2.38 | -0.967  | none |
| SEC31B   | 0.471  | 0.4234  | 3.4712 | 0.00633 | 0.033 | -2.38 | -1.2067 | none |
| STRN4    | 0.691  | 0.6318  | 3.4707 | 0.00634 | 0.033 | -2.38 | -1.5136 | none |
| ARHGAP27 | 0.552  | 0.5331  | 3.4701 | 0.00634 | 0.033 | -2.39 | -0.2214 | none |
| PPIL3    | 0.52   | 0.3083  | 3.4698 | 0.00635 | 0.033 | -2.39 | -0.8169 | none |
| FAF1     | 0.499  | 0.4113  | 3.4684 | 0.00636 | 0.033 | -2.39 | -1.1044 | none |
| CLUAP1   | 0.757  | 0.6514  | 3.4682 | 0.00636 | 0.033 | -2.39 | -1.0328 | none |
| CNOT2    | 0.601  | 0.4853  | 3.468  | 0.00636 | 0.033 | -2.39 | -1.2736 | none |
| CAPN2    | 0.794  | 0.741   | 3.4679 | 0.00636 | 0.033 | -2.39 | -0.1017 | none |
| CD302    | 0.378  | 0.2764  | 3.4674 | 0.00637 | 0.033 | -2.39 | -0.7664 | none |
| COG3     | 0.644  | 0.5667  | 3.467  | 0.00637 | 0.033 | -2.39 | -0.4124 | none |
| ACBD4    | 0.615  | 0.4619  | 3.4666 | 0.00638 | 0.033 | -2.39 | -0.3079 | none |
| FUZ      | 0.537  | 0.4051  | 3.466  | 0.00638 | 0.033 | -2.39 | -1.1707 | none |
| BTBD8    | 0.642  | 0.5364  | 3.4658 | 0.00639 | 0.033 | -2.39 | -0.8535 | none |
| POLR2J3  | 0.647  | 0.4891  | 3.465  | 0.00639 | 0.033 | -2.39 | -1.2501 | none |
| TMEM138  | 0.383  | 0.2616  | 3.4647 | 0.0064  | 0.033 | -2.39 | -1.3745 | none |
| MFN1     | 0.347  | 0.2393  | 3.4638 | 0.00641 | 0.033 | -2.4  | -0.6125 | none |
| MIB2     | 0.403  | 0.3151  | 3.4631 | 0.00641 | 0.033 | -2.4  | 0.28767 | none |
| DCTN4    | 0.579  | 0.4368  | 3.4629 | 0.00642 | 0.033 | -2.4  | -0.9506 | none |
| ZNF57    | 0.456  | 0.3622  | 3.4628 | 0.00642 | 0.033 | -2.4  | -0.3052 | none |
| CAPN7    | 0.734  | 0.6356  | 3.4623 | 0.00642 | 0.033 | -2.4  | -0.9417 | none |
| ZNF610   | 0.551  | 0.4761  | 3.4604 | 0.00644 | 0.033 | -2.4  | -0.7823 | none |
| AKAP7    | 0.684  | 0.5336  | 3.4596 | 0.00645 | 0.033 | -2.4  | -0.8553 | none |
| RIMBP3C  | 0.323  | 0.2608  | 3.4591 | 0.00646 | 0.033 | -2.4  | -1.3523 | none |
| SLX4     | 0.67   | 0.647   | 3.4572 | 0.00648 | 0.033 | -2.41 | -1.0079 | none |
| RPL7L1   | 0.765  | 0.6963  | 3.4561 | 0.00649 | 0.034 | -2.41 | -1.0145 | none |
| CCNJL    | 0.75   | 0.5727  | 3.4555 | 0.0065  | 0.034 | -2.41 | -1.2457 | none |
| VAMP4    | -0.505 | -0.4835 | -3.455 | 0.0065  | 0.034 | -2.41 | 1.41059 | none |
| PAG1     | 0.792  | 0.6346  | 3.455  | 0.0065  | 0.034 | -2.41 | -0.922  | none |
| PECAM1   | 0.539  | 0.4278  | 3.4537 | 0.00651 | 0.034 | -2.41 | -0.4763 | none |
| IRS2     | 0.346  | 0.2471  | 3.4537 | 0.00652 | 0.034 | -2.41 | -1.3533 | none |

|           |        |         |        |         |       |       |         |            |
|-----------|--------|---------|--------|---------|-------|-------|---------|------------|
| CYB5D1    | 0.544  | 0.4772  | 3.4534 | 0.00652 | 0.034 | -2.41 | -1.3255 | none       |
| CHMP7     | 0.337  | 0.2834  | 3.4532 | 0.00652 | 0.034 | -2.41 | -1.0661 | none       |
| FGF13     | 0.467  | 0.3454  | 3.453  | 0.00652 | 0.034 | -2.41 | -1.3277 | none       |
| NLGN4Y    | 0.408  | 0.2863  | 3.4529 | 0.00652 | 0.034 | -2.41 | 0.20554 | none       |
| GMEB1     | 0.571  | 0.4522  | 3.4523 | 0.00653 | 0.034 | -2.41 | -1.1719 | none       |
| TNFRSF13I | 0.391  | 0.325   | 3.4511 | 0.00654 | 0.034 | -2.42 | -0.5374 | none       |
| PMS2      | 0.629  | 0.5806  | 3.4511 | 0.00654 | 0.034 | -2.42 | -0.905  | none       |
| NFKBIB    | 0.458  | 0.3957  | 3.4507 | 0.00655 | 0.034 | -2.42 | -1.401  | none       |
| SERPINB9  | 0.326  | 0.2147  | 3.4498 | 0.00656 | 0.034 | -2.42 | -1.537  | OA-related |
| PHKG1     | 0.639  | 0.4765  | 3.4494 | 0.00656 | 0.034 | -2.42 | -0.0438 | none       |
| ATP13A1   | 0.554  | 0.5607  | 3.4488 | 0.00657 | 0.034 | -2.42 | -1.0693 | none       |
| EIF6      | -0.403 | -0.3505 | -3.447 | 0.00658 | 0.034 | -2.42 | 2.4786  | AA-related |
| CENPI     | 0.577  | 0.4714  | 3.4452 | 0.00661 | 0.034 | -2.43 | -1.0363 | none       |
| FOXRED2   | 0.653  | 0.6119  | 3.445  | 0.00661 | 0.034 | -2.43 | -0.8041 | none       |
| OGT       | 0.551  | 0.4391  | 3.4444 | 0.00661 | 0.034 | -2.43 | -0.9937 | none       |
| DBI       | -0.367 | -0.3553 | -3.444 | 0.00662 | 0.034 | -2.43 | 2.20389 | AA-related |
| ICMT      | 0.382  | 0.3165  | 3.4431 | 0.00663 | 0.034 | -2.43 | 0.69302 | none       |
| CTDSPL2   | 0.469  | 0.3182  | 3.4427 | 0.00663 | 0.034 | -2.43 | -0.6671 | none       |
| AP2A2     | 0.835  | 0.7455  | 3.4412 | 0.00665 | 0.034 | -2.43 | -1.364  | none       |
| PNKP      | 0.382  | 0.298   | 3.441  | 0.00665 | 0.034 | -2.43 | -0.9828 | none       |
| KAT7      | 0.546  | 0.46    | 3.4406 | 0.00666 | 0.034 | -2.43 | -1.3955 | none       |
| CRELD1    | 0.461  | 0.3709  | 3.4402 | 0.00666 | 0.034 | -2.43 | -0.3246 | none       |
| TRRAP     | 1.134  | 1.0895  | 3.4395 | 0.00667 | 0.034 | -2.44 | -1.0881 | none       |
| KLHL30    | 0.291  | 0.208   | 3.4376 | 0.00669 | 0.034 | -2.44 | -1.3532 | none       |
| NEU3      | 0.349  | 0.3388  | 3.4376 | 0.00669 | 0.034 | -2.44 | -0.4133 | none       |
| HLTF      | 1.001  | 0.8931  | 3.4364 | 0.0067  | 0.034 | -2.44 | -1.2837 | none       |
| VHL       | 0.713  | 0.6511  | 3.4362 | 0.00671 | 0.034 | -2.44 | -0.7946 | none       |
| RANBP3    | 0.815  | 0.747   | 3.436  | 0.00671 | 0.034 | -2.44 | -1.2939 | none       |
| TMEM38A   | 0.535  | 0.3783  | 3.4357 | 0.00671 | 0.034 | -2.44 | -0.4929 | none       |
| BUB1B     | 0.818  | 0.7283  | 3.4347 | 0.00672 | 0.034 | -2.44 | -0.9985 | none       |
| HSH2D     | 0.424  | 0.3983  | 3.4336 | 0.00673 | 0.034 | -2.44 | -1.2306 | none       |
| JADE1     | 0.383  | 0.3395  | 3.4315 | 0.00676 | 0.034 | -2.45 | -0.8586 | none       |
| RPP38     | 0.334  | 0.2881  | 3.4311 | 0.00676 | 0.035 | -2.45 | -0.19   | none       |
| NUMBL     | 0.616  | 0.5666  | 3.4283 | 0.00679 | 0.035 | -2.45 | -0.6748 | none       |
| INSL3     | 0.6    | 0.469   | 3.4282 | 0.00679 | 0.035 | -2.45 | -0.5981 | none       |
| BIVM      | 0.547  | 0.4968  | 3.428  | 0.0068  | 0.035 | -2.45 | -0.6042 | none       |
| LONRF2    | 0.331  | 0.2405  | 3.4269 | 0.00681 | 0.035 | -2.46 | -1.323  | none       |
| STRBP     | 0.898  | 0.8092  | 3.4265 | 0.00681 | 0.035 | -2.46 | -1.098  | none       |
| OR8H2     | 0.397  | 0.2838  | 3.4264 | 0.00681 | 0.035 | -2.46 | -1.2427 | none       |
| PEX11G    | -0.626 | -0.5186 | -3.426 | 0.00682 | 0.035 | -2.46 | 0.17983 | none       |

|          |        |         |        |         |       |       |         |            |
|----------|--------|---------|--------|---------|-------|-------|---------|------------|
| PCDHGA1  | 0.297  | 0.2202  | 3.4253 | 0.00683 | 0.035 | -2.46 | -1.2011 | none       |
| NDUFS1   | 0.257  | 0.1721  | 3.4247 | 0.00683 | 0.035 | -2.46 | 0.33311 | none       |
| NACA     | -0.275 | -0.2291 | -3.424 | 0.00684 | 0.035 | -2.46 | 2.04356 | none       |
| PPARGC1E | 0.523  | 0.5026  | 3.4239 | 0.00684 | 0.035 | -2.46 | -0.8926 | none       |
| NCR1     | 0.327  | 0.2108  | 3.4239 | 0.00684 | 0.035 | -2.46 | -1.1223 | none       |
| ATP1A2   | 0.531  | 0.426   | 3.4237 | 0.00684 | 0.035 | -2.46 | -0.9078 | none       |
| RASSF8   | 0.627  | 0.506   | 3.4236 | 0.00685 | 0.035 | -2.46 | -1.2523 | none       |
| TSPYL1   | 0.496  | 0.3619  | 3.4231 | 0.00685 | 0.035 | -2.46 | -1.5314 | none       |
| MRPS17   | 0.593  | 0.411   | 3.4218 | 0.00687 | 0.035 | -2.46 | -1.2158 | none       |
| CHRNA5   | 0.518  | 0.3279  | 3.421  | 0.00687 | 0.035 | -2.47 | -1.0343 | none       |
| EEF1AKM1 | -0.388 | -0.3678 | -3.421 | 0.00688 | 0.035 | -2.47 | 1.1453  | none       |
| SAMD4A   | 0.549  | 0.3537  | 3.4207 | 0.00688 | 0.035 | -2.47 | -1.486  | none       |
| MATK     | 0.38   | 0.2935  | 3.4202 | 0.00688 | 0.035 | -2.47 | -1.204  | none       |
| HIST1H4E | 0.303  | 0.1853  | 3.4201 | 0.00688 | 0.035 | -2.47 | -0.4683 | none       |
| MON2     | 0.67   | 0.5905  | 3.4198 | 0.00689 | 0.035 | -2.47 | -1.0284 | none       |
| CCT7     | -0.337 | -0.2845 | -3.419 | 0.0069  | 0.035 | -2.47 | 2.13855 | AA-related |
| SCO1     | 0.307  | 0.262   | 3.4178 | 0.00691 | 0.035 | -2.47 | -1.003  | none       |
| SGO2     | 1.014  | 0.8924  | 3.415  | 0.00694 | 0.035 | -2.48 | -1.2026 | none       |
| ABHD2    | 0.456  | 0.2934  | 3.4147 | 0.00695 | 0.035 | -2.48 | -0.4922 | none       |
| RGR      | 0.387  | 0.2893  | 3.4145 | 0.00695 | 0.035 | -2.48 | -0.7712 | none       |
| NBEAL2   | 0.821  | 0.8804  | 3.4135 | 0.00696 | 0.035 | -2.48 | -0.7531 | none       |
| TNNC1    | 0.741  | 0.6476  | 3.412  | 0.00698 | 0.035 | -2.48 | -0.0313 | none       |
| GPR141   | 0.565  | 0.388   | 3.412  | 0.00698 | 0.035 | -2.48 | 0.28158 | none       |
| DEF8     | 0.428  | 0.3381  | 3.4117 | 0.00698 | 0.035 | -2.48 | -1.1658 | none       |
| VPS39    | 0.769  | 0.722   | 3.4105 | 0.00699 | 0.035 | -2.48 | -1.1279 | none       |
| HIST2H3A | 0.331  | 0.2571  | 3.4061 | 0.00704 | 0.036 | -2.49 | -1.3184 | none       |
| HIST2H3C | 0.331  | 0.2571  | 3.4061 | 0.00704 | 0.036 | -2.49 | -1.3184 | none       |
| CYLD     | 0.391  | 0.2568  | 3.4058 | 0.00705 | 0.036 | -2.49 | -0.6147 | none       |
| KLHL11   | 0.481  | 0.4027  | 3.4055 | 0.00705 | 0.036 | -2.49 | -1.1466 | none       |
| PKM      | -0.288 | -0.1753 | -3.404 | 0.00707 | 0.036 | -2.49 | 2.01049 | none       |
| UGDH     | 0.327  | 0.2164  | 3.4034 | 0.00708 | 0.036 | -2.49 | -0.9694 | none       |
| SUZ12    | 0.857  | 0.7544  | 3.4031 | 0.00708 | 0.036 | -2.49 | -1.2167 | none       |
| FABP5    | -0.506 | -0.4523 | -3.403 | 0.00709 | 0.036 | -2.5  | 2.23443 | AA-related |
| POMT1    | 0.321  | 0.1978  | 3.4014 | 0.0071  | 0.036 | -2.5  | -1.0279 | none       |
| DGKB     | 0.77   | 0.5471  | 3.401  | 0.00711 | 0.036 | -2.5  | -1.4286 | none       |
| STX7     | 0.524  | 0.3491  | 3.4009 | 0.00711 | 0.036 | -2.5  | -0.8917 | none       |
| DCLK1    | 0.404  | 0.3389  | 3.3986 | 0.00713 | 0.036 | -2.5  | -0.2892 | none       |
| C9ORF50  | 0.448  | 0.3252  | 3.3979 | 0.00714 | 0.036 | -2.5  | -1.2214 | none       |
| AP4S1    | 0.547  | 0.3764  | 3.3978 | 0.00714 | 0.036 | -2.5  | -1.0252 | none       |
| CENPK    | 0.577  | 0.3992  | 3.3973 | 0.00715 | 0.036 | -2.5  | -0.8257 | none       |

|           |        |         |        |         |       |       |         |            |
|-----------|--------|---------|--------|---------|-------|-------|---------|------------|
| FOXJ3     | 0.49   | 0.3617  | 3.3965 | 0.00716 | 0.036 | -2.51 | -0.5553 | none       |
| DMC1      | 0.53   | 0.3238  | 3.3955 | 0.00717 | 0.036 | -2.51 | -0.8634 | none       |
| PRRT3     | 0.531  | 0.5026  | 3.3944 | 0.00718 | 0.036 | -2.51 | -0.8227 | none       |
| C16ORF70  | 0.4    | 0.2731  | 3.3942 | 0.00719 | 0.036 | -2.51 | -1.0898 | none       |
| MTRNR2L1  | -0.252 | -0.1635 | -3.394 | 0.00719 | 0.036 | -2.51 | 1.00509 | none       |
| KCNC2     | 0.792  | 0.66    | 3.3929 | 0.0072  | 0.036 | -2.51 | 0.36157 | none       |
| CLDN5     | 0.385  | 0.3163  | 3.3929 | 0.0072  | 0.036 | -2.51 | -0.4368 | none       |
| ZNF417    | 0.59   | 0.5419  | 3.3919 | 0.00721 | 0.036 | -2.51 | -0.3538 | none       |
| RAD51     | 0.65   | 0.4925  | 3.3916 | 0.00722 | 0.036 | -2.51 | -1.3986 | none       |
| CSGALNAC3 | 0.661  | 0.5731  | 3.391  | 0.00722 | 0.036 | -2.51 | -1.1106 | none       |
| PTPRZ1    | 0.765  | 0.6152  | 3.3907 | 0.00723 | 0.036 | -2.52 | -0.8192 | none       |
| AKIP1     | 0.457  | 0.2817  | 3.3905 | 0.00723 | 0.036 | -2.52 | -1.3363 | none       |
| GNE       | 0.757  | 0.649   | 3.3904 | 0.00723 | 0.036 | -2.52 | -0.4279 | none       |
| SEMA3B    | 0.306  | 0.1804  | 3.3889 | 0.00725 | 0.036 | -2.52 | -0.6754 | none       |
| NUP188    | 0.744  | 0.7028  | 3.3888 | 0.00725 | 0.036 | -2.52 | -1.047  | none       |
| NFE2L2    | 0.465  | 0.4169  | 3.3887 | 0.00725 | 0.036 | -2.52 | -0.4814 | none       |
| SCUBE2    | 0.699  | 0.5765  | 3.3879 | 0.00726 | 0.036 | -2.52 | 0.47672 | none       |
| RINT1     | 0.767  | 0.5439  | 3.3875 | 0.00726 | 0.036 | -2.52 | -0.6133 | none       |
| ALDH1L1   | 0.627  | 0.4856  | 3.3867 | 0.00727 | 0.036 | -2.52 | -0.9355 | none       |
| DYNLRB1   | -0.391 | -0.3936 | -3.387 | 0.00728 | 0.036 | -2.52 | 2.12252 | AA-related |
| SULT1A4   | 0.623  | 0.4495  | 3.3863 | 0.00728 | 0.036 | -2.52 | -0.65   | none       |
| BRCA1     | 1.066  | 1.0199  | 3.3859 | 0.00728 | 0.036 | -2.52 | -1.1712 | none       |
| TEX9      | 0.639  | 0.4933  | 3.3843 | 0.0073  | 0.036 | -2.53 | -1.4599 | none       |
| RNF135    | 0.372  | 0.2769  | 3.3839 | 0.00731 | 0.037 | -2.53 | -0.0818 | none       |
| AC010287  | 1.046  | 0.8163  | 3.3833 | 0.00732 | 0.037 | -2.53 | -1.0849 | none       |
| SEC61A2   | 0.443  | 0.301   | 3.3833 | 0.00732 | 0.037 | -2.53 | -0.1712 | none       |
| RMDN1     | 0.455  | 0.2972  | 3.3832 | 0.00732 | 0.037 | -2.53 | -0.8447 | none       |
| MUC1      | 0.546  | 0.6151  | 3.3819 | 0.00733 | 0.037 | -2.53 | 0.82845 | none       |
| ZYG11B    | 0.464  | 0.3422  | 3.3808 | 0.00735 | 0.037 | -2.53 | -0.9675 | none       |
| VEGFA     | 0.376  | 0.4307  | 3.3808 | 0.00735 | 0.037 | -2.53 | 0.60034 | none       |
| SLC2A11   | 0.439  | 0.2203  | 3.3802 | 0.00735 | 0.037 | -2.53 | -1.0495 | none       |
| EPM2AIP1  | 0.525  | 0.3615  | 3.3797 | 0.00736 | 0.037 | -2.53 | -1.444  | none       |
| NR1I3     | 0.697  | 0.5828  | 3.379  | 0.00737 | 0.037 | -2.53 | -0.8323 | none       |
| ENTPD3    | 1.019  | 0.702   | 3.3786 | 0.00737 | 0.037 | -2.53 | -0.3099 | none       |
| PLCB1     | 0.789  | 0.5787  | 3.3784 | 0.00738 | 0.037 | -2.54 | -0.5538 | none       |
| TMEM241   | 0.378  | 0.2315  | 3.3782 | 0.00738 | 0.037 | -2.54 | -0.5259 | none       |
| PLBD2     | 0.642  | 0.5809  | 3.3781 | 0.00738 | 0.037 | -2.54 | -0.7482 | none       |
| FBXO48    | 0.38   | 0.2816  | 3.378  | 0.00738 | 0.037 | -2.54 | -1.4031 | none       |
| PIGG      | 0.541  | 0.4274  | 3.3775 | 0.00739 | 0.037 | -2.54 | -1.1468 | none       |
| CRKL      | 0.441  | 0.3638  | 3.3768 | 0.00739 | 0.037 | -2.54 | 0.15089 | none       |



|          |        |         |        |         |       |       |         |            |
|----------|--------|---------|--------|---------|-------|-------|---------|------------|
| ELL      | 0.47   | 0.425   | 3.3764 | 0.0074  | 0.037 | -2.54 | 0.24802 | none       |
| RNF149   | 0.364  | 0.2169  | 3.3763 | 0.0074  | 0.037 | -2.54 | -0.6258 | none       |
| AMER3    | 0.291  | 0.2195  | 3.3744 | 0.00742 | 0.037 | -2.54 | -1.1084 | none       |
| NPIP3    | 1.006  | 1.0493  | 3.3744 | 0.00742 | 0.037 | -2.54 | -0.7325 | none       |
| GLCC1    | 0.491  | 0.3715  | 3.3743 | 0.00742 | 0.037 | -2.54 | -1.0114 | none       |
| METTL2A  | 0.388  | 0.266   | 3.3741 | 0.00743 | 0.037 | -2.54 | -0.7499 | none       |
| OR4F15   | 0.492  | 0.3167  | 3.3738 | 0.00743 | 0.037 | -2.54 | -1.2413 | none       |
| DDX3X    | 0.573  | 0.4881  | 3.3736 | 0.00743 | 0.037 | -2.54 | -1.1008 | none       |
| C10ORF95 | 0.418  | 0.302   | 3.3735 | 0.00743 | 0.037 | -2.54 | -1.431  | none       |
| DNAJA4   | 0.484  | 0.4636  | 3.3728 | 0.00744 | 0.037 | -2.54 | -1.1793 | none       |
| SV2A     | 0.477  | 0.3025  | 3.3726 | 0.00745 | 0.037 | -2.54 | -1.4179 | none       |
| IBTK     | 0.398  | 0.2959  | 3.3726 | 0.00745 | 0.037 | -2.54 | -1.3614 | none       |
| PRPH2    | 0.335  | 0.2125  | 3.3723 | 0.00745 | 0.037 | -2.55 | -0.6873 | none       |
| GGT1     | -0.341 | -0.2647 | -3.372 | 0.00745 | 0.037 | -2.55 | 2.56722 | AA-related |
| STK10    | 0.87   | 0.8492  | 3.3717 | 0.00746 | 0.037 | -2.55 | -0.9953 | none       |
| C12ORF66 | 0.404  | 0.2627  | 3.3715 | 0.00746 | 0.037 | -2.55 | -0.51   | none       |
| RASA4B   | 0.509  | 0.5035  | 3.3712 | 0.00746 | 0.037 | -2.55 | -0.6273 | none       |
| ZNF354A  | 0.646  | 0.599   | 3.3702 | 0.00748 | 0.037 | -2.55 | -0.4401 | none       |
| ZNF266   | 0.502  | 0.4408  | 3.37   | 0.00748 | 0.037 | -2.55 | -0.9908 | none       |
| GRPEL1   | -0.283 | -0.2407 | -3.37  | 0.00748 | 0.037 | -2.55 | 2.56947 | AA-related |
| TTF1     | 0.954  | 0.8815  | 3.3699 | 0.00748 | 0.037 | -2.55 | -1.1403 | none       |
| GUF1     | 0.454  | 0.3582  | 3.3698 | 0.00748 | 0.037 | -2.55 | -0.7018 | none       |
| LRAT     | 0.318  | 0.2272  | 3.3692 | 0.00749 | 0.037 | -2.55 | -1.139  | none       |
| NBPF19   | 0.672  | 0.7281  | 3.3689 | 0.00749 | 0.037 | -2.55 | -0.7196 | none       |
| UBE2G2   | 0.41   | 0.3224  | 3.3683 | 0.0075  | 0.037 | -2.55 | -0.5038 | none       |
| PER2     | 0.749  | 0.6649  | 3.3679 | 0.0075  | 0.037 | -2.55 | -1.1944 | none       |
| MPLKIP   | 0.457  | 0.2859  | 3.3663 | 0.00752 | 0.037 | -2.56 | -1.0443 | none       |
| CHDH     | 0.329  | 0.208   | 3.3646 | 0.00754 | 0.037 | -2.56 | -1.3284 | none       |
| CPS1     | 0.557  | 0.417   | 3.3636 | 0.00756 | 0.037 | -2.56 | -1.0124 | none       |
| XPO4     | 0.418  | 0.2884  | 3.3636 | 0.00756 | 0.037 | -2.56 | 0.27736 | none       |
| DUSP2    | -0.638 | -0.4856 | -3.363 | 0.00756 | 0.037 | -2.56 | 1.23014 | none       |
| BSDC1    | 0.418  | 0.3875  | 3.363  | 0.00756 | 0.037 | -2.56 | -1.0358 | none       |
| NOSTRIN  | 0.67   | 0.4591  | 3.3627 | 0.00757 | 0.037 | -2.56 | -0.2448 | none       |
| TESC     | 0.413  | 0.2959  | 3.3626 | 0.00757 | 0.037 | -2.56 | -0.6673 | none       |
| C9ORF57  | 0.291  | 0.2037  | 3.3621 | 0.00758 | 0.037 | -2.56 | -1.3289 | none       |
| KYAT1    | 0.903  | 0.7406  | 3.362  | 0.00758 | 0.037 | -2.56 | -0.223  | none       |
| CLASP1   | 0.976  | 0.9474  | 3.3612 | 0.00759 | 0.037 | -2.56 | -0.7627 | none       |
| EHD2     | 0.627  | 0.4011  | 3.3611 | 0.00759 | 0.037 | -2.56 | -1.1108 | none       |
| ZNF256   | 0.35   | 0.2661  | 3.3606 | 0.00759 | 0.037 | -2.56 | 0.71933 | none       |
| ZNF813   | 0.597  | 0.5139  | 3.3596 | 0.00761 | 0.037 | -2.57 | -1.4386 | none       |

|         |        |         |        |         |       |       |         |            |
|---------|--------|---------|--------|---------|-------|-------|---------|------------|
| EPPIN   | 0.318  | 0.2178  | 3.3589 | 0.00762 | 0.037 | -2.57 | -0.6803 | none       |
| PEX5L   | 0.331  | 0.2783  | 3.3578 | 0.00763 | 0.037 | -2.57 | -1.2571 | none       |
| PREPL   | 0.856  | 0.6766  | 3.3573 | 0.00764 | 0.038 | -2.57 | -1.1365 | none       |
| P2RX7   | 0.68   | 0.63    | 3.3567 | 0.00764 | 0.038 | -2.57 | -1.2422 | none       |
| SLC9A1  | 0.645  | 0.6178  | 3.3565 | 0.00765 | 0.038 | -2.57 | -1.1104 | none       |
| MYO1F   | 0.801  | 0.7135  | 3.3564 | 0.00765 | 0.038 | -2.57 | -1.42   | none       |
| ESPN    | -0.33  | -0.2186 | -3.356 | 0.00765 | 0.038 | -2.57 | 2.56567 | AA-related |
| PLIN2   | 0.381  | 0.3279  | 3.3549 | 0.00767 | 0.038 | -2.57 | 0.45113 | none       |
| YWHAZ   | -0.278 | -0.2665 | -3.355 | 0.00767 | 0.038 | -2.57 | 1.5326  | none       |
| ZNF860  | 0.282  | 0.1988  | 3.3548 | 0.00767 | 0.038 | -2.57 | -1.4644 | none       |
| WDTC1   | 0.397  | 0.36    | 3.3542 | 0.00768 | 0.038 | -2.58 | -0.8334 | none       |
| EID1    | -0.352 | -0.3219 | -3.353 | 0.00769 | 0.038 | -2.58 | 2.30876 | AA-related |
| SNRPD1  | -0.473 | -0.4344 | -3.353 | 0.0077  | 0.038 | -2.58 | 2.51144 | AA-related |
| GJB4    | 0.279  | 0.202   | 3.3517 | 0.00771 | 0.038 | -2.58 | -1.5827 | OA-related |
| SPACA7  | 0.364  | 0.2836  | 3.3516 | 0.00771 | 0.038 | -2.58 | -0.8178 | none       |
| PDK1    | 0.409  | 0.3442  | 3.3513 | 0.00771 | 0.038 | -2.58 | 0.15638 | none       |
| EMC4    | 0.439  | 0.2735  | 3.351  | 0.00772 | 0.038 | -2.58 | -1.2936 | none       |
| MCFD2   | 0.556  | 0.4393  | 3.3503 | 0.00772 | 0.038 | -2.58 | -1.4264 | none       |
| ATF6B   | 0.782  | 0.5861  | 3.35   | 0.00773 | 0.038 | -2.58 | -1.1114 | none       |
| COPS2   | 0.58   | 0.4537  | 3.35   | 0.00773 | 0.038 | -2.58 | -0.7168 | none       |
| EXOSC2  | 0.384  | 0.2943  | 3.3495 | 0.00774 | 0.038 | -2.58 | -1.1749 | none       |
| ADAM32  | 0.635  | 0.5278  | 3.3495 | 0.00774 | 0.038 | -2.58 | -0.2171 | none       |
| SP140L  | 0.869  | 0.7877  | 3.3477 | 0.00776 | 0.038 | -2.59 | -1.1274 | none       |
| P3H2    | 0.873  | 0.7253  | 3.347  | 0.00777 | 0.038 | -2.59 | -1.3577 | none       |
| NAP1L1  | -0.269 | -0.2363 | -3.347 | 0.00777 | 0.038 | -2.59 | 1.85865 | none       |
| ST8SIA4 | 0.462  | 0.3368  | 3.3466 | 0.00777 | 0.038 | -2.59 | -0.2619 | none       |
| IFI35   | 0.413  | 0.2447  | 3.3465 | 0.00777 | 0.038 | -2.59 | -1.1304 | none       |
| EGFL7   | -0.354 | -0.315  | -3.346 | 0.00777 | 0.038 | -2.59 | 1.73783 | none       |
| XRCC2   | 0.508  | 0.471   | 3.3463 | 0.00778 | 0.038 | -2.59 | -1.3273 | none       |
| KCNAB3  | 0.594  | 0.5227  | 3.3444 | 0.0078  | 0.038 | -2.59 | -0.9586 | none       |
| ANKRD9  | 0.539  | 0.4264  | 3.3439 | 0.00781 | 0.038 | -2.59 | -1.1352 | none       |
| SLC2A8  | 0.578  | 0.4403  | 3.3436 | 0.00781 | 0.038 | -2.59 | -0.2691 | none       |
| ZDBF2   | 0.456  | 0.4298  | 3.3433 | 0.00782 | 0.038 | -2.59 | -0.9008 | none       |
| EPS8L2  | -0.709 | -0.4705 | -3.343 | 0.00782 | 0.038 | -2.59 | 1.8698  | none       |
| BAHCC1  | -0.28  | -0.1958 | -3.342 | 0.00783 | 0.038 | -2.59 | 1.26297 | none       |
| TMSB4X  | -0.442 | -0.4214 | -3.342 | 0.00783 | 0.038 | -2.6  | 2.04448 | none       |
| DRAM1   | 0.535  | 0.3373  | 3.3417 | 0.00784 | 0.038 | -2.6  | -0.9848 | none       |
| SAMHD1  | 0.656  | 0.5206  | 3.341  | 0.00785 | 0.038 | -2.6  | -1.2153 | none       |
| ERGIC1  | 0.293  | 0.2144  | 3.3389 | 0.00787 | 0.038 | -2.6  | -1.1261 | none       |
| GRM7    | 0.514  | 0.4089  | 3.3383 | 0.00788 | 0.038 | -2.6  | -1.2804 | none       |

|          |        |         |        |         |       |       |         |            |
|----------|--------|---------|--------|---------|-------|-------|---------|------------|
| AVIL     | 0.599  | 0.4743  | 3.3378 | 0.00789 | 0.038 | -2.6  | -0.7591 | none       |
| IFNAR1   | 0.632  | 0.5233  | 3.3373 | 0.00789 | 0.038 | -2.6  | -1.0185 | none       |
| CPT2     | 0.53   | 0.4371  | 3.3373 | 0.00789 | 0.038 | -2.6  | -0.457  | none       |
| HLA-G    | 0.746  | 0.4802  | 3.3362 | 0.00791 | 0.038 | -2.6  | -0.3641 | none       |
| ZC3H10   | 0.491  | 0.3989  | 3.3359 | 0.00791 | 0.038 | -2.6  | -0.843  | none       |
| ADRA1A   | 0.613  | 0.3853  | 3.3348 | 0.00793 | 0.038 | -2.61 | -0.9272 | none       |
| TMEM231  | 0.456  | 0.2621  | 3.334  | 0.00794 | 0.038 | -2.61 | -0.9272 | none       |
| ZNF736   | 0.483  | 0.2999  | 3.3334 | 0.00794 | 0.039 | -2.61 | -0.7708 | none       |
| GALR1    | 0.267  | 0.192   | 3.3331 | 0.00795 | 0.039 | -2.61 | -0.8349 | none       |
| BDKRB1   | 0.594  | 0.44    | 3.3324 | 0.00796 | 0.039 | -2.61 | -0.9104 | none       |
| C3ORF49  | 1.258  | 0.9439  | 3.3322 | 0.00796 | 0.039 | -2.61 | -1.4252 | none       |
| QKI      | 0.66   | 0.5491  | 3.3322 | 0.00796 | 0.039 | -2.61 | -1.473  | none       |
| SLC14A1  | 0.581  | 0.4999  | 3.3306 | 0.00798 | 0.039 | -2.61 | -1.2378 | none       |
| GPATCH8  | 0.979  | 0.9762  | 3.3304 | 0.00798 | 0.039 | -2.61 | -0.8007 | none       |
| CLEC7A   | 0.338  | 0.1838  | 3.3303 | 0.00798 | 0.039 | -2.61 | -0.9946 | none       |
| GNAI3    | 0.278  | 0.1561  | 3.3293 | 0.008   | 0.039 | -2.62 | -0.8184 | none       |
| C3ORF22  | 0.274  | 0.274   | 3.3288 | 0.008   | 0.039 | -2.62 | -0.2214 | none       |
| TRPM7    | 0.934  | 0.8215  | 3.3287 | 0.00801 | 0.039 | -2.62 | -1.3666 | none       |
| RRNAD1   | 0.663  | 0.5131  | 3.3282 | 0.00801 | 0.039 | -2.62 | -1.0399 | none       |
| FBXO45   | 0.377  | 0.2592  | 3.3281 | 0.00801 | 0.039 | -2.62 | -1.1896 | none       |
| ESR2     | 0.421  | 0.3122  | 3.3273 | 0.00802 | 0.039 | -2.62 | -1.1269 | none       |
| AAK1     | 0.617  | 0.5613  | 3.3273 | 0.00803 | 0.039 | -2.62 | -1.0067 | none       |
| MBNL3    | 0.498  | 0.3872  | 3.327  | 0.00803 | 0.039 | -2.62 | -1.2094 | none       |
| CD27     | -0.383 | -0.333  | -3.327 | 0.00803 | 0.039 | -2.62 | 1.75282 | none       |
| DPP9     | 0.645  | 0.6084  | 3.3266 | 0.00803 | 0.039 | -2.62 | -0.9692 | none       |
| NR2C1    | 0.571  | 0.4854  | 3.3255 | 0.00805 | 0.039 | -2.62 | -0.9745 | none       |
| TUBGCP5  | 0.671  | 0.5674  | 3.3251 | 0.00805 | 0.039 | -2.62 | -0.2    | none       |
| GLYATL2  | 0.307  | 0.2377  | 3.3248 | 0.00806 | 0.039 | -2.62 | -0.5341 | none       |
| ANKRD36C | 0.588  | 0.5488  | 3.3237 | 0.00807 | 0.039 | -2.62 | -0.4197 | none       |
| RNASEL   | 0.432  | 0.3755  | 3.3235 | 0.00808 | 0.039 | -2.63 | -1.1063 | none       |
| CCDC8    | 0.267  | 0.2115  | 3.3234 | 0.00808 | 0.039 | -2.63 | -1.2499 | none       |
| PAFAH1B1 | 0.376  | 0.2602  | 3.3233 | 0.00808 | 0.039 | -2.63 | -1.5066 | none       |
| FPR1     | 0.437  | 0.3356  | 3.3232 | 0.00808 | 0.039 | -2.63 | -0.2606 | none       |
| G6PC3    | 0.548  | 0.4433  | 3.3231 | 0.00808 | 0.039 | -2.63 | -1.0956 | none       |
| ZNF614   | 0.74   | 0.6013  | 3.3222 | 0.00809 | 0.039 | -2.63 | -1.4515 | none       |
| EDA      | 0.551  | 0.4423  | 3.322  | 0.0081  | 0.039 | -2.63 | -0.2186 | none       |
| WBP1L    | 0.46   | 0.3535  | 3.3218 | 0.0081  | 0.039 | -2.63 | -1.1911 | none       |
| C14ORF93 | 0.579  | 0.5022  | 3.3209 | 0.00811 | 0.039 | -2.63 | -0.8133 | none       |
| DUSP4    | -0.345 | -0.2352 | -3.32  | 0.00812 | 0.039 | -2.63 | 0.972   | none       |
| PGK1     | -0.451 | -0.4075 | -3.32  | 0.00812 | 0.039 | -2.63 | 2.42384 | AA-related |

|         |        |         |        |         |       |       |         |            |
|---------|--------|---------|--------|---------|-------|-------|---------|------------|
| SPDYE2B | 0.631  | 0.5525  | 3.3197 | 0.00813 | 0.039 | -2.63 | -1.2749 | none       |
| LRRC74B | 0.479  | 0.3678  | 3.3195 | 0.00813 | 0.039 | -2.63 | -1.4475 | none       |
| IPO5    | 0.493  | 0.4264  | 3.3195 | 0.00813 | 0.039 | -2.63 | -0.8906 | none       |
| ARAF    | 0.459  | 0.337   | 3.3187 | 0.00814 | 0.039 | -2.63 | -1.1035 | none       |
| NETO2   | 0.483  | 0.3505  | 3.3184 | 0.00814 | 0.039 | -2.63 | -0.7356 | none       |
| ZNF75A  | 0.627  | 0.5573  | 3.3182 | 0.00815 | 0.039 | -2.63 | -1.425  | none       |
| ZNF574  | 0.411  | 0.3683  | 3.3177 | 0.00815 | 0.039 | -2.63 | -0.8001 | none       |
| RBM43   | 0.5    | 0.3948  | 3.317  | 0.00816 | 0.039 | -2.64 | -1.5855 | OA-related |
| PRPSAP2 | 0.387  | 0.2289  | 3.3167 | 0.00817 | 0.039 | -2.64 | -0.9047 | none       |
| AIM2    | 0.548  | 0.4317  | 3.3166 | 0.00817 | 0.039 | -2.64 | -0.9908 | none       |
| RTCB    | -0.302 | -0.2615 | -3.316 | 0.00817 | 0.039 | -2.64 | 2.51638 | AA-related |
| L3MBTL3 | 0.683  | 0.5503  | 3.3161 | 0.00818 | 0.039 | -2.64 | 0.06919 | none       |
| MTHFD1L | 0.465  | 0.4004  | 3.3155 | 0.00818 | 0.039 | -2.64 | -1.0785 | none       |
| PIPOX   | 0.76   | 0.5391  | 3.3138 | 0.00821 | 0.039 | -2.64 | -0.6519 | none       |
| TLR7    | 0.385  | 0.2796  | 3.3132 | 0.00821 | 0.039 | -2.64 | -1.4464 | none       |
| DHX40   | 0.326  | 0.1561  | 3.3129 | 0.00822 | 0.039 | -2.64 | -0.6078 | none       |
| HHLA2   | 0.765  | 0.6074  | 3.3129 | 0.00822 | 0.039 | -2.64 | -0.6034 | none       |
| TMEM41B | 0.488  | 0.2984  | 3.3125 | 0.00822 | 0.039 | -2.64 | -1.0976 | none       |
| RND2    | 0.543  | 0.4572  | 3.3122 | 0.00823 | 0.039 | -2.64 | -0.5789 | none       |
| FANCI   | 0.603  | 0.5488  | 3.3121 | 0.00823 | 0.039 | -2.64 | -0.7135 | none       |
| ARFIP1  | 0.666  | 0.493   | 3.3115 | 0.00824 | 0.039 | -2.65 | -0.4533 | none       |
| ZNF594  | 0.566  | 0.4844  | 3.311  | 0.00824 | 0.039 | -2.65 | -1.3089 | none       |
| C7ORF43 | -0.38  | -0.2352 | -3.311 | 0.00825 | 0.039 | -2.65 | 1.29894 | none       |
| TBL1X   | 0.782  | 0.7111  | 3.3095 | 0.00827 | 0.039 | -2.65 | -1.0961 | none       |
| FAM151B | 0.657  | 0.5452  | 3.3086 | 0.00828 | 0.039 | -2.65 | -0.9907 | none       |
| SOD2    | 0.335  | 0.2039  | 3.3061 | 0.00831 | 0.04  | -2.65 | -1.2877 | none       |
| PRKCD   | 1.005  | 0.8463  | 3.3058 | 0.00832 | 0.04  | -2.65 | -1.1473 | none       |
| CDC27   | 0.516  | 0.4863  | 3.3057 | 0.00832 | 0.04  | -2.65 | -0.7062 | none       |
| CCNL1   | 0.535  | 0.5646  | 3.3055 | 0.00832 | 0.04  | -2.65 | -0.3093 | none       |
| TBC1D8  | 0.793  | 0.7513  | 3.3051 | 0.00832 | 0.04  | -2.66 | -1.286  | none       |
| OR3A2   | 0.496  | 0.4241  | 3.3048 | 0.00833 | 0.04  | -2.66 | -0.8731 | none       |
| ELMOD1  | 0.593  | 0.4918  | 3.3045 | 0.00833 | 0.04  | -2.66 | -1.0518 | none       |
| SMIM17  | 0.582  | 0.3911  | 3.3044 | 0.00833 | 0.04  | -2.66 | -0.7846 | none       |
| SCLT1   | 0.322  | 0.2256  | 3.3029 | 0.00836 | 0.04  | -2.66 | -1.0959 | none       |
| ZNF37A  | 0.674  | 0.6218  | 3.3024 | 0.00836 | 0.04  | -2.66 | -1.3332 | none       |
| COQ6    | 0.415  | 0.2748  | 3.3019 | 0.00837 | 0.04  | -2.66 | -1.0561 | none       |
| GALNT10 | 0.59   | 0.5273  | 3.3009 | 0.00838 | 0.04  | -2.66 | -0.8304 | none       |
| ABCA9   | 0.714  | 0.574   | 3.3006 | 0.00839 | 0.04  | -2.66 | -1.1457 | none       |
| KANSL2  | 0.286  | 0.2206  | 3.3004 | 0.00839 | 0.04  | -2.66 | 0.86694 | none       |
| AARS2   | 0.547  | 0.5512  | 3.3001 | 0.00839 | 0.04  | -2.66 | -0.5193 | none       |

|          |        |         |        |         |       |       |         |            |
|----------|--------|---------|--------|---------|-------|-------|---------|------------|
| NEDD4    | 0.722  | 0.6655  | 3.2992 | 0.00841 | 0.04  | -2.67 | -1.1943 | none       |
| ZFP82    | 0.368  | 0.2658  | 3.2984 | 0.00842 | 0.04  | -2.67 | -1.4142 | none       |
| R3HDM1   | 1.124  | 1.0546  | 3.2976 | 0.00843 | 0.04  | -2.67 | -0.9896 | none       |
| ZNF621   | 0.708  | 0.6123  | 3.2973 | 0.00843 | 0.04  | -2.67 | -1.0089 | none       |
| TOR4A    | 0.303  | 0.2264  | 3.2968 | 0.00844 | 0.04  | -2.67 | -1.1027 | none       |
| NOTO     | 0.312  | 0.2321  | 3.2956 | 0.00846 | 0.04  | -2.67 | -1.4305 | none       |
| HPS3     | 0.571  | 0.4347  | 3.2954 | 0.00846 | 0.04  | -2.67 | -0.6954 | none       |
| ZNF821   | 0.65   | 0.4605  | 3.2951 | 0.00846 | 0.04  | -2.67 | -0.4678 | none       |
| GNB5     | 0.477  | 0.2948  | 3.2949 | 0.00847 | 0.04  | -2.67 | -1.2448 | none       |
| ELL2     | 0.637  | 0.673   | 3.2947 | 0.00847 | 0.04  | -2.67 | 0.03122 | none       |
| BOC      | 0.265  | 0.2292  | 3.2946 | 0.00847 | 0.04  | -2.67 | 0.2988  | none       |
| SAMD15   | 0.426  | 0.3119  | 3.2941 | 0.00848 | 0.04  | -2.67 | -0.9814 | none       |
| ANKRD11  | 0.729  | 0.7659  | 3.294  | 0.00848 | 0.04  | -2.67 | -0.9835 | none       |
| ZNF624   | 1.074  | 0.8794  | 3.2937 | 0.00848 | 0.04  | -2.67 | -0.5882 | none       |
| XKR9     | 0.471  | 0.2949  | 3.2936 | 0.00849 | 0.04  | -2.67 | -1.2048 | none       |
| CLK2     | 0.302  | 0.2889  | 3.2931 | 0.00849 | 0.04  | -2.68 | -0.2084 | none       |
| ZFP90    | 0.823  | 0.7747  | 3.2927 | 0.0085  | 0.04  | -2.68 | -0.9506 | none       |
| NEB      | 0.531  | 0.4124  | 3.292  | 0.00851 | 0.04  | -2.68 | -1.4978 | none       |
| ZSCAN32  | 0.543  | 0.4495  | 3.292  | 0.00851 | 0.04  | -2.68 | -1.2592 | none       |
| TOP3B    | 0.781  | 0.7094  | 3.2919 | 0.00851 | 0.04  | -2.68 | -1.3145 | none       |
| SSBP3    | 0.772  | 0.7017  | 3.2917 | 0.00851 | 0.04  | -2.68 | -0.5398 | none       |
| WDR17    | 0.69   | 0.5888  | 3.2914 | 0.00852 | 0.04  | -2.68 | -0.8972 | none       |
| HNRNPUL1 | 1.059  | 1.0118  | 3.2914 | 0.00852 | 0.04  | -2.68 | -1.0991 | none       |
| CALB1    | 0.477  | 0.4235  | 3.2895 | 0.00854 | 0.04  | -2.68 | 0.22532 | none       |
| SNRNPB2  | -0.371 | -0.3705 | -3.288 | 0.00856 | 0.04  | -2.68 | 1.77823 | none       |
| RD3      | 0.358  | 0.268   | 3.2876 | 0.00857 | 0.04  | -2.68 | -1.543  | OA-related |
| SPPL3    | 0.435  | 0.3091  | 3.2874 | 0.00857 | 0.04  | -2.68 | -0.9313 | none       |
| FBXL8    | 0.603  | 0.4439  | 3.2874 | 0.00857 | 0.04  | -2.68 | -1.2624 | none       |
| NNT      | 0.439  | 0.3499  | 3.2873 | 0.00857 | 0.04  | -2.68 | -0.1655 | none       |
| MEGF9    | 0.475  | 0.3872  | 3.2868 | 0.00858 | 0.04  | -2.69 | -1.2021 | none       |
| NKTR     | 0.652  | 0.6003  | 3.2864 | 0.00859 | 0.04  | -2.69 | -1.0903 | none       |
| KCND3    | 0.26   | 0.1886  | 3.2859 | 0.00859 | 0.04  | -2.69 | -1.4833 | none       |
| ANTXR2   | 0.437  | 0.3201  | 3.2842 | 0.00862 | 0.041 | -2.69 | -0.2297 | none       |
| SLC30A6  | 0.558  | 0.3181  | 3.284  | 0.00862 | 0.041 | -2.69 | -0.9484 | none       |
| PLXDC2   | 0.296  | 0.202   | 3.2831 | 0.00863 | 0.041 | -2.69 | -1.5528 | OA-related |
| LRP1B    | 0.351  | 0.2411  | 3.2827 | 0.00864 | 0.041 | -2.69 | -0.1858 | none       |
| PLEKHH1  | 0.529  | 0.4023  | 3.2825 | 0.00864 | 0.041 | -2.69 | -1.2801 | none       |
| ZBED9    | 0.362  | 0.2703  | 3.2818 | 0.00865 | 0.041 | -2.69 | -1.415  | none       |
| PEX26    | 0.541  | 0.4562  | 3.2813 | 0.00866 | 0.041 | -2.69 | 0.02294 | none       |
| CAPN8    | 0.871  | 0.7264  | 3.2804 | 0.00867 | 0.041 | -2.7  | -0.2069 | none       |

|          |        |         |        |         |       |       |         |            |
|----------|--------|---------|--------|---------|-------|-------|---------|------------|
| APBB2    | 0.869  | 0.7388  | 3.2801 | 0.00868 | 0.041 | -2.7  | -0.9882 | none       |
| TMCO6    | 0.776  | 0.6895  | 3.2789 | 0.0087  | 0.041 | -2.7  | -0.2185 | none       |
| EPG5     | 0.585  | 0.4801  | 3.2788 | 0.0087  | 0.041 | -2.7  | -0.9344 | none       |
| SEMA3D   | 0.598  | 0.481   | 3.2787 | 0.0087  | 0.041 | -2.7  | -0.9339 | none       |
| PBRM1    | 0.859  | 0.7734  | 3.2786 | 0.0087  | 0.041 | -2.7  | -1.2145 | none       |
| CFAP73   | 0.556  | 0.443   | 3.2768 | 0.00873 | 0.041 | -2.7  | -0.7372 | none       |
| PRKX     | 0.441  | 0.3216  | 3.2759 | 0.00874 | 0.041 | -2.7  | -1.0144 | none       |
| ITK      | 0.532  | 0.4335  | 3.2746 | 0.00876 | 0.041 | -2.71 | -1.0796 | none       |
| TRPC1    | 0.636  | 0.5978  | 3.2736 | 0.00877 | 0.041 | -2.71 | -0.0128 | none       |
| PTCD2    | 0.271  | 0.1795  | 3.2735 | 0.00877 | 0.041 | -2.71 | -0.377  | none       |
| MYLK4    | 0.285  | 0.1837  | 3.2729 | 0.00878 | 0.041 | -2.71 | -1.1195 | none       |
| PPHLN1   | 0.371  | 0.2531  | 3.2727 | 0.00879 | 0.041 | -2.71 | -0.492  | none       |
| FBXO27   | 0.551  | 0.4037  | 3.2723 | 0.00879 | 0.041 | -2.71 | -1.1436 | none       |
| ARRB2    | 0.561  | 0.4604  | 3.2704 | 0.00882 | 0.041 | -2.71 | -0.9519 | none       |
| TGFBR3L  | -0.433 | -0.3306 | -3.27  | 0.00883 | 0.041 | -2.71 | 0.65388 | none       |
| XPOT     | 0.41   | 0.3787  | 3.268  | 0.00885 | 0.041 | -2.72 | 0.09274 | none       |
| PTTG1    | -0.46  | -0.4152 | -3.267 | 0.00887 | 0.041 | -2.72 | 2.3342  | AA-related |
| OR4E2    | 0.322  | 0.2223  | 3.2654 | 0.00889 | 0.042 | -2.72 | -1.2193 | none       |
| THOC3    | 0.438  | 0.2467  | 3.2653 | 0.00889 | 0.042 | -2.72 | -0.9808 | none       |
| HSF1     | 0.468  | 0.4107  | 3.2649 | 0.0089  | 0.042 | -2.72 | -0.0533 | none       |
| KLHL22   | 0.396  | 0.3349  | 3.2646 | 0.0089  | 0.042 | -2.72 | -0.7863 | none       |
| ZNF519   | 0.68   | 0.5569  | 3.2644 | 0.00891 | 0.042 | -2.72 | -0.9705 | none       |
| ARHGEF39 | 0.323  | 0.2195  | 3.2637 | 0.00892 | 0.042 | -2.72 | -0.4865 | none       |
| NUCB2    | 0.743  | 0.6125  | 3.2635 | 0.00892 | 0.042 | -2.72 | -1.3583 | none       |
| SLC16A11 | -0.274 | -0.2115 | -3.263 | 0.00893 | 0.042 | -2.72 | 1.15084 | none       |
| APOD     | 0.676  | 0.539   | 3.2626 | 0.00893 | 0.042 | -2.73 | -0.9463 | none       |
| FAM222B  | 0.698  | 0.67    | 3.2611 | 0.00896 | 0.042 | -2.73 | -0.2792 | none       |
| CRTC3    | 0.558  | 0.5483  | 3.261  | 0.00896 | 0.042 | -2.73 | -1.2506 | none       |
| AKNAD1   | 0.38   | 0.3114  | 3.2607 | 0.00896 | 0.042 | -2.73 | -0.7262 | none       |
| CCNB2    | -0.447 | -0.4245 | -3.261 | 0.00896 | 0.042 | -2.73 | 2.4439  | AA-related |
| PFKFB2   | 0.428  | 0.2582  | 3.2599 | 0.00897 | 0.042 | -2.73 | -0.2682 | none       |
| SPRYD7   | 0.541  | 0.4199  | 3.2584 | 0.009   | 0.042 | -2.73 | -0.5172 | none       |
| PTPN12   | 1.002  | 0.8763  | 3.2583 | 0.009   | 0.042 | -2.73 | -1.3143 | none       |
| ATP6AP1L | 0.544  | 0.4195  | 3.2571 | 0.00902 | 0.042 | -2.73 | -1.3126 | none       |
| CTCF     | 0.863  | 0.8006  | 3.2555 | 0.00904 | 0.042 | -2.74 | -1.1788 | none       |
| GPR157   | 0.786  | 0.6765  | 3.2553 | 0.00904 | 0.042 | -2.74 | -0.8063 | none       |
| CBL      | 0.402  | 0.3563  | 3.2548 | 0.00905 | 0.042 | -2.74 | 0.08777 | none       |
| SLC35C1  | 0.33   | 0.211   | 3.2545 | 0.00905 | 0.042 | -2.74 | -0.1888 | none       |
| APBA2    | -0.492 | -0.3156 | -3.253 | 0.00907 | 0.042 | -2.74 | 0.97934 | none       |
| CLPX     | 0.572  | 0.4951  | 3.2532 | 0.00907 | 0.042 | -2.74 | -1.0744 | none       |

|          |        |         |        |         |       |       |         |            |
|----------|--------|---------|--------|---------|-------|-------|---------|------------|
| TARDBP   | 0.299  | 0.1891  | 3.2529 | 0.00908 | 0.042 | -2.74 | -0.4236 | none       |
| ST6GAL2  | 0.402  | 0.3496  | 3.2529 | 0.00908 | 0.042 | -2.74 | -1.3423 | none       |
| SFXN1    | 0.245  | 0.1511  | 3.2526 | 0.00908 | 0.042 | -2.74 | -0.4817 | none       |
| ZDHHC18  | 0.402  | 0.3119  | 3.2522 | 0.00909 | 0.042 | -2.74 | -1.0563 | none       |
| FOXP4    | 0.785  | 0.7225  | 3.2521 | 0.00909 | 0.042 | -2.74 | -1.1434 | none       |
| FMO5     | 0.533  | 0.3751  | 3.2514 | 0.0091  | 0.042 | -2.74 | -1.4268 | none       |
| BAIAP2L1 | 0.635  | 0.5684  | 3.2514 | 0.0091  | 0.042 | -2.74 | -1.1898 | none       |
| FUT10    | -0.341 | -0.289  | -3.251 | 0.00911 | 0.042 | -2.74 | 1.31901 | none       |
| EIF1AD   | 0.523  | 0.3651  | 3.2493 | 0.00913 | 0.042 | -2.75 | -1.4138 | none       |
| USP37    | 0.717  | 0.6503  | 3.2476 | 0.00916 | 0.042 | -2.75 | -0.4271 | none       |
| PACS1    | 0.701  | 0.642   | 3.2467 | 0.00917 | 0.042 | -2.75 | -1.1274 | none       |
| KBTBD8   | 0.448  | 0.3101  | 3.2447 | 0.0092  | 0.043 | -2.75 | 0.07764 | none       |
| FBRSL1   | 0.707  | 0.7618  | 3.2439 | 0.00921 | 0.043 | -2.76 | -0.1581 | none       |
| TAF1     | 0.95   | 0.8246  | 3.2439 | 0.00922 | 0.043 | -2.76 | -1.0831 | none       |
| GDF11    | 0.457  | 0.4036  | 3.2415 | 0.00925 | 0.043 | -2.76 | -0.8715 | none       |
| DENND4C  | 0.657  | 0.5806  | 3.2403 | 0.00927 | 0.043 | -2.76 | -1.19   | none       |
| INPP5F   | -0.307 | -0.1959 | -3.24  | 0.00927 | 0.043 | -2.76 | 1.65733 | none       |
| TCF7L1   | 0.843  | 0.6036  | 3.2401 | 0.00927 | 0.043 | -2.76 | -0.5434 | none       |
| CAMK2D   | 0.265  | 0.199   | 3.2401 | 0.00927 | 0.043 | -2.76 | 0.33899 | none       |
| PWWP2A   | 0.753  | 0.6442  | 3.2391 | 0.00929 | 0.043 | -2.76 | -1.2197 | none       |
| GCLM     | 0.371  | 0.1734  | 3.2389 | 0.00929 | 0.043 | -2.76 | -1.0753 | none       |
| SLFN12L  | 0.576  | 0.4781  | 3.2383 | 0.0093  | 0.043 | -2.77 | -1.2368 | none       |
| PPM1K    | 0.41   | 0.3134  | 3.2376 | 0.00931 | 0.043 | -2.77 | -1.3095 | none       |
| FAM98B   | 0.624  | 0.5279  | 3.2375 | 0.00931 | 0.043 | -2.77 | -1.0653 | none       |
| FAM47E-S | 0.242  | 0.1358  | 3.2375 | 0.00931 | 0.043 | -2.77 | -0.135  | none       |
| PDZK1    | 0.515  | 0.4303  | 3.237  | 0.00932 | 0.043 | -2.77 | -1.0736 | none       |
| DZIP1    | 0.294  | 0.2108  | 3.2367 | 0.00933 | 0.043 | -2.77 | -1.6189 | OA-related |
| LDHAL6A  | 0.544  | 0.3922  | 3.2363 | 0.00933 | 0.043 | -2.77 | -1.2952 | none       |
| C2CD2L   | 0.593  | 0.5477  | 3.2349 | 0.00935 | 0.043 | -2.77 | -0.651  | none       |
| LRP11    | 0.312  | 0.1722  | 3.2347 | 0.00936 | 0.043 | -2.77 | -1.2198 | none       |
| GADD45A  | 0.388  | 0.3628  | 3.2344 | 0.00936 | 0.043 | -2.77 | 0.08492 | none       |
| BCL7A    | 0.467  | 0.402   | 3.2343 | 0.00936 | 0.043 | -2.77 | -1.1374 | none       |
| NBPF3    | 0.563  | 0.5105  | 3.2339 | 0.00937 | 0.043 | -2.77 | -1.1278 | none       |
| AGO4     | 0.547  | 0.5487  | 3.2338 | 0.00937 | 0.043 | -2.77 | -0.5211 | none       |
| AMPD3    | 0.626  | 0.5102  | 3.2337 | 0.00937 | 0.043 | -2.77 | -0.393  | none       |
| GNG7     | 0.302  | 0.2469  | 3.2335 | 0.00938 | 0.043 | -2.77 | -1.4302 | none       |
| NFIC     | 0.803  | 0.776   | 3.2323 | 0.0094  | 0.043 | -2.78 | -0.4443 | none       |
| PTPN23   | 0.703  | 0.7163  | 3.2322 | 0.0094  | 0.043 | -2.78 | -0.4517 | none       |
| SLC37A2  | 0.425  | 0.3968  | 3.2318 | 0.0094  | 0.043 | -2.78 | -0.0856 | none       |
| DDX6     | 0.716  | 0.5778  | 3.2311 | 0.00941 | 0.043 | -2.78 | -1.1133 | none       |

|          |        |         |        |         |       |       |         |            |
|----------|--------|---------|--------|---------|-------|-------|---------|------------|
| FAM78A   | 0.535  | 0.5191  | 3.2306 | 0.00942 | 0.043 | -2.78 | -0.9651 | none       |
| FAM91A1  | 0.425  | 0.3757  | 3.2293 | 0.00944 | 0.043 | -2.78 | -0.6592 | none       |
| AMIGO2   | -0.332 | -0.3293 | -3.228 | 0.00946 | 0.043 | -2.78 | 0.76938 | none       |
| CCDC65   | 0.512  | 0.4888  | 3.2265 | 0.00949 | 0.044 | -2.78 | -0.261  | none       |
| TTBK2    | 0.638  | 0.4906  | 3.226  | 0.00949 | 0.044 | -2.79 | -1.0171 | none       |
| STK17B   | 0.391  | 0.2323  | 3.2247 | 0.00951 | 0.044 | -2.79 | -1.2267 | none       |
| EXD3     | 0.554  | 0.418   | 3.2246 | 0.00952 | 0.044 | -2.79 | -1.381  | none       |
| PGM1     | -0.273 | -0.1946 | -3.224 | 0.00952 | 0.044 | -2.79 | 2.26992 | AA-related |
| YPEL2    | 0.458  | 0.3065  | 3.2236 | 0.00953 | 0.044 | -2.79 | -0.3544 | none       |
| SLC35F6  | 0.36   | 0.2683  | 3.2235 | 0.00953 | 0.044 | -2.79 | -1.4259 | none       |
| ZNF160   | 0.723  | 0.6143  | 3.2228 | 0.00954 | 0.044 | -2.79 | -0.7276 | none       |
| WDR7     | 0.496  | 0.4636  | 3.2226 | 0.00955 | 0.044 | -2.79 | -0.0602 | none       |
| FKBP10   | 0.865  | 0.7134  | 3.2212 | 0.00957 | 0.044 | -2.79 | -0.7235 | none       |
| SYNRG    | 0.895  | 0.804   | 3.2206 | 0.00958 | 0.044 | -2.79 | -1.3413 | none       |
| AKTIP    | 0.402  | 0.2605  | 3.2202 | 0.00959 | 0.044 | -2.8  | -0.8262 | none       |
| SNRK     | 0.467  | 0.397   | 3.2201 | 0.00959 | 0.044 | -2.8  | -1.3927 | none       |
| AMMECR1  | 0.465  | 0.3445  | 3.2199 | 0.00959 | 0.044 | -2.8  | 0.37426 | none       |
| KATNBL1  | 0.39   | 0.2282  | 3.2196 | 0.0096  | 0.044 | -2.8  | -1.0895 | none       |
| OR51E2   | 0.443  | 0.3326  | 3.2195 | 0.0096  | 0.044 | -2.8  | -1.1161 | none       |
| TEFM     | 0.575  | 0.4143  | 3.2186 | 0.00961 | 0.044 | -2.8  | -0.9724 | none       |
| FAM192A  | 0.484  | 0.4316  | 3.2186 | 0.00961 | 0.044 | -2.8  | -1.2453 | none       |
| CHRNA3   | 0.523  | 0.3984  | 3.2183 | 0.00962 | 0.044 | -2.8  | -0.735  | none       |
| SMARCA4  | 0.774  | 0.7957  | 3.2183 | 0.00962 | 0.044 | -2.8  | -0.9646 | none       |
| OR1M1    | 0.522  | 0.3557  | 3.2183 | 0.00962 | 0.044 | -2.8  | -1.4493 | none       |
| PLA2G10  | 0.417  | 0.2736  | 3.2168 | 0.00964 | 0.044 | -2.8  | -0.1952 | none       |
| SDK2     | 0.831  | 0.6123  | 3.2166 | 0.00964 | 0.044 | -2.8  | -1.222  | none       |
| TRIM46   | 0.503  | 0.3666  | 3.2166 | 0.00964 | 0.044 | -2.8  | -1.26   | none       |
| TLR10    | 0.472  | 0.328   | 3.216  | 0.00965 | 0.044 | -2.8  | -1.384  | none       |
| RALBP1   | 0.868  | 0.8071  | 3.2148 | 0.00967 | 0.044 | -2.8  | -0.869  | none       |
| C16ORF54 | 0.434  | 0.2725  | 3.2146 | 0.00968 | 0.044 | -2.8  | -1.3889 | none       |
| TMEM189  | 0.347  | 0.2753  | 3.2146 | 0.00968 | 0.044 | -2.8  | -0.0536 | none       |
| CRTAP    | 0.446  | 0.2701  | 3.2145 | 0.00968 | 0.044 | -2.8  | -0.4507 | none       |
| DNAJC30  | 0.304  | 0.2051  | 3.2141 | 0.00968 | 0.044 | -2.81 | -0.8875 | none       |
| ESD      | -0.469 | -0.4419 | -3.214 | 0.00969 | 0.044 | -2.81 | 2.47881 | AA-related |
| FES      | -0.327 | -0.0607 | -3.214 | 0.00969 | 0.044 | -2.81 | 0.06587 | none       |
| AFG3L2   | 0.484  | 0.5019  | 3.2133 | 0.0097  | 0.044 | -2.81 | -0.0253 | none       |
| EIF3G    | 0.308  | 0.2397  | 3.2133 | 0.0097  | 0.044 | -2.81 | -1.0928 | none       |
| CCNT2    | 0.79   | 0.6816  | 3.212  | 0.00972 | 0.044 | -2.81 | -0.9232 | none       |
| DPYSL2   | 0.35   | 0.2785  | 3.2116 | 0.00972 | 0.044 | -2.81 | -0.9132 | none       |
| ZNF197   | 0.424  | 0.3528  | 3.2109 | 0.00974 | 0.044 | -2.81 | -1.301  | none       |



|          |        |         |        |         |       |       |         |            |
|----------|--------|---------|--------|---------|-------|-------|---------|------------|
| ZNF708   | 0.661  | 0.5112  | 3.2099 | 0.00975 | 0.044 | -2.81 | -0.9979 | none       |
| HIST1H4I | 0.286  | 0.1144  | 3.2096 | 0.00976 | 0.044 | -2.81 | -0.4726 | none       |
| GPNMB    | 0.69   | 0.5977  | 3.2093 | 0.00976 | 0.044 | -2.81 | -0.7457 | none       |
| PYCR2    | 0.405  | 0.3329  | 3.209  | 0.00977 | 0.044 | -2.81 | -0.9265 | none       |
| KMT2A    | 1.028  | 0.9847  | 3.209  | 0.00977 | 0.044 | -2.81 | -1.2794 | none       |
| HECA     | 0.41   | 0.3251  | 3.2089 | 0.00977 | 0.044 | -2.81 | -1.1189 | none       |
| DENND1A  | 0.428  | 0.4291  | 3.2083 | 0.00978 | 0.044 | -2.81 | -0.9925 | none       |
| LRRC37A  | 0.418  | 0.3006  | 3.2082 | 0.00978 | 0.044 | -2.81 | -0.7163 | none       |
| RELL1    | 0.508  | 0.3826  | 3.2079 | 0.00978 | 0.044 | -2.82 | -1.4624 | none       |
| RPL7A    | -0.432 | -0.4152 | -3.207 | 0.00979 | 0.044 | -2.82 | 1.916   | none       |
| KDELC2   | 0.606  | 0.4584  | 3.207  | 0.0098  | 0.044 | -2.82 | -0.9615 | none       |
| CYP17A1  | 0.464  | 0.3635  | 3.2052 | 0.00983 | 0.045 | -2.82 | -0.8242 | none       |
| DMPK     | 0.582  | 0.477   | 3.2052 | 0.00983 | 0.045 | -2.82 | -0.6986 | none       |
| RUNX2    | 0.819  | 0.7082  | 3.2044 | 0.00984 | 0.045 | -2.82 | -1.0526 | none       |
| ZNF845   | 0.583  | 0.4991  | 3.2042 | 0.00984 | 0.045 | -2.82 | -1.2039 | none       |
| CORIN    | 0.369  | 0.2652  | 3.2032 | 0.00986 | 0.045 | -2.82 | -1.4845 | none       |
| STAT3    | 0.698  | 0.6441  | 3.203  | 0.00986 | 0.045 | -2.82 | -0.7522 | none       |
| DENR     | 0.353  | 0.2692  | 3.2017 | 0.00989 | 0.045 | -2.83 | -1.1811 | none       |
| ARPC2    | -0.273 | -0.2263 | -3.202 | 0.00989 | 0.045 | -2.83 | 1.8266  | none       |
| IL1R1    | 0.312  | 0.223   | 3.2007 | 0.0099  | 0.045 | -2.83 | -1.433  | none       |
| RILPL2   | 0.348  | 0.2761  | 3.2003 | 0.00991 | 0.045 | -2.83 | -1.5059 | none       |
| ITPKB    | 0.605  | 0.5418  | 3.1995 | 0.00992 | 0.045 | -2.83 | -1.3825 | none       |
| ZHX1-C8O | -0.707 | -0.5736 | -3.199 | 0.00993 | 0.045 | -2.83 | 1.52517 | none       |
| PTPRE    | 0.615  | 0.5732  | 3.1985 | 0.00994 | 0.045 | -2.83 | 0.24328 | none       |
| RABGAP1L | 0.307  | 0.1753  | 3.1982 | 0.00994 | 0.045 | -2.83 | -1.1808 | none       |
| CEP83    | 0.735  | 0.6328  | 3.1982 | 0.00994 | 0.045 | -2.83 | -1.1674 | none       |
| FBXO15   | 0.485  | 0.3576  | 3.1976 | 0.00995 | 0.045 | -2.83 | -0.7999 | none       |
| ADCY2    | 0.416  | 0.2881  | 3.1968 | 0.00997 | 0.045 | -2.83 | -0.8199 | none       |
| ASF1B    | -0.387 | -0.2994 | -3.196 | 0.00998 | 0.045 | -2.84 | 2.48276 | AA-related |
| ZNF786   | 0.536  | 0.4639  | 3.1942 | 0.01001 | 0.045 | -2.84 | -0.9893 | none       |
| SEC14L1  | 0.271  | 0.2188  | 3.1937 | 0.01002 | 0.045 | -2.84 | -0.8627 | none       |
| HERPUD2  | 0.486  | 0.3443  | 3.1934 | 0.01002 | 0.045 | -2.84 | -1.1834 | none       |
| GSTCD    | 0.706  | 0.5861  | 3.1932 | 0.01003 | 0.045 | -2.84 | -1.298  | none       |
| HP1BP3   | 0.638  | 0.6099  | 3.1932 | 0.01003 | 0.045 | -2.84 | -1      | none       |
| MAPK8IP2 | 0.35   | 0.2539  | 3.1925 | 0.01004 | 0.045 | -2.84 | -1.1809 | none       |
| TMEM239  | 0.268  | 0.1895  | 3.1907 | 0.01007 | 0.045 | -2.84 | -1.3594 | none       |
| HID1     | 0.53   | 0.3667  | 3.1901 | 0.01008 | 0.045 | -2.84 | -0.3705 | none       |
| SHROOM1  | 0.556  | 0.3541  | 3.189  | 0.0101  | 0.045 | -2.85 | -1.165  | none       |
| MPHOSPH  | 1.038  | 1.0207  | 3.1883 | 0.01011 | 0.045 | -2.85 | -0.9559 | none       |
| RPL19    | -0.322 | -0.2793 | -3.188 | 0.01011 | 0.045 | -2.85 | 2.09855 | AA-related |

|          |        |         |        |         |       |       |         |            |
|----------|--------|---------|--------|---------|-------|-------|---------|------------|
| KCNJ3    | 0.414  | 0.2824  | 3.1877 | 0.01012 | 0.045 | -2.85 | -1.2311 | none       |
| MUC5B    | -0.208 | -0.1303 | -3.187 | 0.01012 | 0.045 | -2.85 | 0.84415 | none       |
| LRRK1    | 0.372  | 0.3414  | 3.1865 | 0.01014 | 0.046 | -2.85 | -0.983  | none       |
| CDKN2C   | -0.31  | -0.2235 | -3.186 | 0.01014 | 0.046 | -2.85 | 0.16602 | none       |
| TSHR     | 0.608  | 0.4322  | 3.1855 | 0.01016 | 0.046 | -2.85 | -1.2487 | none       |
| GABRP    | 0.848  | 0.8241  | 3.185  | 0.01017 | 0.046 | -2.85 | -0.4959 | none       |
| KIF27    | 0.665  | 0.475   | 3.1844 | 0.01017 | 0.046 | -2.85 | -1.1391 | none       |
| ZNF461   | 0.785  | 0.5186  | 3.1835 | 0.01019 | 0.046 | -2.86 | -0.7922 | none       |
| ST8SIA5  | 0.349  | 0.2793  | 3.1831 | 0.0102  | 0.046 | -2.86 | -1.2477 | none       |
| CEACAM2  | 0.407  | 0.3045  | 3.1828 | 0.0102  | 0.046 | -2.86 | -0.3422 | none       |
| FAM126B  | 0.641  | 0.6153  | 3.1819 | 0.01022 | 0.046 | -2.86 | -1.0572 | none       |
| TRIM69   | 0.527  | 0.4617  | 3.181  | 0.01023 | 0.046 | -2.86 | -1.3114 | none       |
| PPIA     | -0.42  | -0.4009 | -3.178 | 0.01028 | 0.046 | -2.86 | 1.59169 | none       |
| CASC4    | 0.549  | 0.4043  | 3.1783 | 0.01028 | 0.046 | -2.86 | -0.835  | none       |
| PROCA1   | 0.684  | 0.5985  | 3.1765 | 0.01031 | 0.046 | -2.87 | -1.1564 | none       |
| ODC1     | -0.376 | -0.3076 | -3.175 | 0.01033 | 0.046 | -2.87 | 1.07365 | none       |
| ROGDI    | -0.603 | -0.4758 | -3.175 | 0.01033 | 0.046 | -2.87 | 1.02323 | none       |
| ABLIM3   | 0.512  | 0.5629  | 3.1735 | 0.01036 | 0.046 | -2.87 | -0.5368 | none       |
| TFDP1    | -0.315 | -0.2197 | -3.173 | 0.01037 | 0.046 | -2.87 | 1.25615 | none       |
| FFAR1    | 0.33   | 0.2488  | 3.1732 | 0.01037 | 0.046 | -2.87 | -1.1462 | none       |
| NPIPA1   | 0.696  | 0.5975  | 3.1725 | 0.01038 | 0.046 | -2.87 | -1.1373 | none       |
| SH2B1    | 1.294  | 1.1175  | 3.1723 | 0.01038 | 0.046 | -2.87 | -0.47   | none       |
| DYM      | 0.511  | 0.3756  | 3.1707 | 0.01041 | 0.047 | -2.88 | 0.04157 | none       |
| PLA2G5   | 0.391  | 0.3297  | 3.1696 | 0.01043 | 0.047 | -2.88 | -0.204  | none       |
| GOLPH3L  | 0.345  | 0.1514  | 3.1685 | 0.01045 | 0.047 | -2.88 | 0.541   | none       |
| LDHA     | -0.527 | -0.476  | -3.168 | 0.01046 | 0.047 | -2.88 | 2.09457 | AA-related |
| LIF      | 0.416  | 0.4757  | 3.1678 | 0.01046 | 0.047 | -2.88 | 0.00805 | none       |
| NMD3     | 0.275  | 0.2027  | 3.1677 | 0.01046 | 0.047 | -2.88 | 0.21095 | none       |
| NFATC2IP | 0.459  | 0.4218  | 3.1676 | 0.01046 | 0.047 | -2.88 | -0.7032 | none       |
| CWF19L1  | 0.659  | 0.5717  | 3.167  | 0.01047 | 0.047 | -2.88 | -0.9869 | none       |
| ZC3H13   | 0.489  | 0.5433  | 3.1661 | 0.01049 | 0.047 | -2.88 | 0.10737 | none       |
| ATRNL1   | 0.869  | 0.5955  | 3.166  | 0.01049 | 0.047 | -2.88 | -1.2253 | none       |
| USP35    | 0.42   | 0.3962  | 3.1658 | 0.0105  | 0.047 | -2.88 | -0.1827 | none       |
| PCDH9    | 0.27   | 0.2009  | 3.1652 | 0.01051 | 0.047 | -2.89 | -1.5135 | none       |
| SERAC1   | 0.266  | 0.147   | 3.165  | 0.01051 | 0.047 | -2.89 | -0.4126 | none       |
| FBXO6    | 0.404  | 0.2262  | 3.1649 | 0.01051 | 0.047 | -2.89 | -0.859  | none       |
| PYGO1    | 0.264  | 0.1856  | 3.1647 | 0.01052 | 0.047 | -2.89 | -0.5699 | none       |
| MAP6D1   | 0.344  | 0.3966  | 3.1646 | 0.01052 | 0.047 | -2.89 | 0.46288 | none       |
| STAC3    | 0.673  | 0.5638  | 3.164  | 0.01053 | 0.047 | -2.89 | -0.4202 | none       |
| ANKRD20A | 0.56   | 0.4138  | 3.1637 | 0.01053 | 0.047 | -2.89 | -1.1276 | none       |

|           |        |         |        |         |       |       |         |            |
|-----------|--------|---------|--------|---------|-------|-------|---------|------------|
| ACSL4     | 0.398  | 0.3145  | 3.1636 | 0.01053 | 0.047 | -2.89 | -0.877  | none       |
| AP1G2     | 0.53   | 0.5274  | 3.1631 | 0.01054 | 0.047 | -2.89 | -0.6803 | none       |
| STAC2     | 0.452  | 0.3464  | 3.1629 | 0.01055 | 0.047 | -2.89 | -1.2468 | none       |
| RAB11FIP3 | 0.547  | 0.5232  | 3.1625 | 0.01055 | 0.047 | -2.89 | -0.1119 | none       |
| ALKBH4    | 0.381  | 0.2861  | 3.162  | 0.01056 | 0.047 | -2.89 | -1.317  | none       |
| RNF144A   | 0.567  | 0.3781  | 3.1606 | 0.01059 | 0.047 | -2.89 | -0.0138 | none       |
| PON3      | 0.677  | 0.464   | 3.1599 | 0.0106  | 0.047 | -2.89 | -0.1377 | none       |
| RPAIN     | 0.414  | 0.2379  | 3.159  | 0.01061 | 0.047 | -2.9  | -1.0925 | none       |
| KDM2B     | 0.531  | 0.5141  | 3.158  | 0.01063 | 0.047 | -2.9  | -0.6572 | none       |
| CDK10     | 0.431  | 0.4336  | 3.1569 | 0.01065 | 0.047 | -2.9  | -0.6079 | none       |
| KCNMB4    | 0.446  | 0.3181  | 3.155  | 0.01069 | 0.047 | -2.9  | -1.0722 | none       |
| NPRL3     | 0.443  | 0.3917  | 3.1543 | 0.0107  | 0.047 | -2.9  | -1.2323 | none       |
| TSPYL2    | 0.659  | 0.6715  | 3.1542 | 0.0107  | 0.047 | -2.9  | -0.8933 | none       |
| ITGB1     | 0.467  | 0.3824  | 3.1531 | 0.01072 | 0.048 | -2.91 | -0.5101 | none       |
| ERC2      | 0.337  | 0.2986  | 3.1529 | 0.01072 | 0.048 | -2.91 | -0.29   | none       |
| CLCN2     | 0.556  | 0.3785  | 3.1523 | 0.01074 | 0.048 | -2.91 | -1.155  | none       |
| POLM      | 0.452  | 0.3876  | 3.1508 | 0.01076 | 0.048 | -2.91 | -0.7669 | none       |
| MBIP      | 0.317  | 0.1877  | 3.1507 | 0.01076 | 0.048 | -2.91 | -0.4045 | none       |
| ABCC8     | 0.333  | 0.282   | 3.1505 | 0.01077 | 0.048 | -2.91 | -1.0129 | none       |
| THYN1     | -0.359 | -0.3278 | -3.15  | 0.01077 | 0.048 | -2.91 | 2.69156 | AA-related |
| CXORF56   | 0.792  | 0.6616  | 3.15   | 0.01078 | 0.048 | -2.91 | -0.9614 | none       |
| CRELD2    | 0.314  | 0.2636  | 3.1494 | 0.01079 | 0.048 | -2.91 | -0.2088 | none       |
| GNL3L     | 0.887  | 0.839   | 3.1494 | 0.01079 | 0.048 | -2.91 | -1.0518 | none       |
| ECT2L     | 0.398  | 0.3016  | 3.1487 | 0.0108  | 0.048 | -2.91 | -1.3042 | none       |
| ABCB7     | 0.3    | 0.2017  | 3.1483 | 0.01081 | 0.048 | -2.91 | 0.7191  | none       |
| BANF1     | -0.382 | -0.3672 | -3.148 | 0.01081 | 0.048 | -2.91 | 2.01201 | none       |
| C9ORF64   | 0.585  | 0.3946  | 3.1479 | 0.01081 | 0.048 | -2.91 | -0.6298 | none       |
| MAP3K11   | 0.719  | 0.6125  | 3.1478 | 0.01082 | 0.048 | -2.91 | -1.0719 | none       |
| UBR5      | 0.958  | 0.8762  | 3.1476 | 0.01082 | 0.048 | -2.91 | -1.0638 | none       |
| CD180     | 0.244  | 0.204   | 3.1472 | 0.01083 | 0.048 | -2.92 | -1.1022 | none       |
| GRAP2     | -0.356 | -0.312  | -3.146 | 0.01085 | 0.048 | -2.92 | 1.88765 | none       |
| PHC3      | 0.557  | 0.4428  | 3.1459 | 0.01085 | 0.048 | -2.92 | -0.9778 | none       |
| PSTPIP2   | 0.431  | 0.3455  | 3.1454 | 0.01086 | 0.048 | -2.92 | -0.8101 | none       |
| PUM1      | 0.534  | 0.4941  | 3.1451 | 0.01086 | 0.048 | -2.92 | -0.8678 | none       |
| EI24      | 0.536  | 0.3598  | 3.1449 | 0.01087 | 0.048 | -2.92 | -1.272  | none       |
| FGF22     | 0.364  | 0.291   | 3.1442 | 0.01088 | 0.048 | -2.92 | -0.9952 | none       |
| SYNE4     | 0.464  | 0.3618  | 3.144  | 0.01088 | 0.048 | -2.92 | -0.6547 | none       |
| SNAP29    | 0.421  | 0.3544  | 3.1439 | 0.01089 | 0.048 | -2.92 | -0.7768 | none       |
| RMND5B    | 0.461  | 0.3778  | 3.1439 | 0.01089 | 0.048 | -2.92 | -0.6817 | none       |
| PRDX6     | -0.484 | -0.4576 | -3.142 | 0.01092 | 0.048 | -2.92 | 2.63294 | AA-related |

|          |        |         |        |         |       |       |         |            |
|----------|--------|---------|--------|---------|-------|-------|---------|------------|
| ENSA     | 0.356  | 0.292   | 3.1418 | 0.01092 | 0.048 | -2.92 | -1.1161 | none       |
| OR6C4    | 0.331  | 0.2369  | 3.1405 | 0.01095 | 0.048 | -2.93 | -1.4223 | none       |
| IBA57    | 0.509  | 0.3687  | 3.1397 | 0.01096 | 0.048 | -2.93 | -0.6837 | none       |
| ZNF418   | 0.711  | 0.5487  | 3.1395 | 0.01097 | 0.048 | -2.93 | -0.1246 | none       |
| INTS2    | 0.493  | 0.4154  | 3.1387 | 0.01098 | 0.048 | -2.93 | -0.691  | none       |
| FADS2    | 0.662  | 0.5726  | 3.1384 | 0.01099 | 0.048 | -2.93 | -0.6564 | none       |
| RASAL2   | 0.635  | 0.5267  | 3.1381 | 0.01099 | 0.048 | -2.93 | -1.2768 | none       |
| RAPGEF2  | 0.756  | 0.7549  | 3.1379 | 0.011   | 0.048 | -2.93 | -0.4767 | none       |
| C17ORF75 | 0.28   | 0.1238  | 3.1374 | 0.011   | 0.048 | -2.93 | -0.6766 | none       |
| CCNYL1   | 0.657  | 0.5009  | 3.1367 | 0.01102 | 0.048 | -2.93 | -1.3486 | none       |
| TMSB10   | -0.563 | -0.5163 | -3.136 | 0.01103 | 0.048 | -2.93 | 2.45279 | AA-related |
| UNC13C   | 0.305  | 0.1961  | 3.1358 | 0.01103 | 0.048 | -2.93 | -1.3768 | none       |
| RABGAP1  | 0.761  | 0.7359  | 3.1337 | 0.01107 | 0.049 | -2.94 | -0.8846 | none       |
| JOSD1    | 0.328  | 0.2703  | 3.1335 | 0.01108 | 0.049 | -2.94 | -1.3743 | none       |
| SAE1     | -0.28  | -0.1827 | -3.133 | 0.01109 | 0.049 | -2.94 | 1.18092 | none       |
| ARHGEF26 | 0.289  | 0.218   | 3.1324 | 0.0111  | 0.049 | -2.94 | -1.053  | none       |
| SRGAP2B  | 0.397  | 0.4008  | 3.1323 | 0.0111  | 0.049 | -2.94 | -0.5468 | none       |
| CHPT1    | 0.571  | 0.4114  | 3.1322 | 0.0111  | 0.049 | -2.94 | -0.5633 | none       |
| C12ORF43 | 0.684  | 0.6345  | 3.1322 | 0.0111  | 0.049 | -2.94 | -1.0298 | none       |
| HOXA13   | -0.225 | -0.161  | -3.132 | 0.0111  | 0.049 | -2.94 | 1.07738 | none       |
| CPAMD8   | 0.572  | 0.399   | 3.1317 | 0.01111 | 0.049 | -2.94 | -0.7977 | none       |
| MTRNR2L1 | 0.332  | 0.2612  | 3.1315 | 0.01111 | 0.049 | -2.94 | -0.3255 | none       |
| AOC1     | 0.319  | 0.2289  | 3.1305 | 0.01113 | 0.049 | -2.94 | -1.1566 | none       |
| FLG2     | 0.218  | 0.1489  | 3.1304 | 0.01113 | 0.049 | -2.94 | -1.218  | none       |
| ULK4     | 0.521  | 0.4374  | 3.13   | 0.01114 | 0.049 | -2.94 | -1.2819 | none       |
| TSFM     | -0.306 | -0.2679 | -3.129 | 0.01115 | 0.049 | -2.94 | 2.37716 | AA-related |
| SLC25A32 | 0.322  | 0.1952  | 3.1291 | 0.01116 | 0.049 | -2.95 | -0.8315 | none       |
| VPS9D1   | 0.477  | 0.3871  | 3.129  | 0.01116 | 0.049 | -2.95 | -1.1315 | none       |
| CA7      | -0.277 | -0.2047 | -3.128 | 0.01118 | 0.049 | -2.95 | 0.24436 | none       |
| TXNDC12  | -0.5   | -0.4731 | -3.128 | 0.01119 | 0.049 | -2.95 | 2.18243 | AA-related |
| RAB2B    | 0.31   | 0.188   | 3.1275 | 0.01119 | 0.049 | -2.95 | -0.8137 | none       |
| PTCHD1   | 0.27   | 0.1835  | 3.1271 | 0.0112  | 0.049 | -2.95 | -1.47   | none       |
| ZNF526   | 0.511  | 0.4519  | 3.1268 | 0.0112  | 0.049 | -2.95 | -1.0298 | none       |
| PKD1     | 0.545  | 0.5184  | 3.1266 | 0.01121 | 0.049 | -2.95 | -0.8514 | none       |
| CSPP1    | 0.674  | 0.6452  | 3.1265 | 0.01121 | 0.049 | -2.95 | -0.233  | none       |
| ATP8B2   | 0.696  | 0.6334  | 3.1231 | 0.01127 | 0.049 | -2.96 | -0.6554 | none       |
| DBR1     | 0.425  | 0.239   | 3.123  | 0.01127 | 0.049 | -2.96 | -1.2438 | none       |
| CCL28    | 0.484  | 0.3294  | 3.1224 | 0.01128 | 0.049 | -2.96 | -1.2191 | none       |
| ZNF425   | 0.394  | 0.3186  | 3.1213 | 0.01131 | 0.049 | -2.96 | -0.4159 | none       |
| FAM72A   | 0.401  | 0.3601  | 3.1212 | 0.01131 | 0.049 | -2.96 | -0.3914 | none       |

|          |        |         |        |         |       |       |         |            |
|----------|--------|---------|--------|---------|-------|-------|---------|------------|
| DCAF4L1  | 0.276  | 0.2006  | 3.1211 | 0.01131 | 0.049 | -2.96 | -1.0774 | none       |
| ZNF681   | 0.55   | 0.4058  | 3.1201 | 0.01133 | 0.049 | -2.96 | -0.9679 | none       |
| PPP1R14D | 0.549  | 0.439   | 3.12   | 0.01133 | 0.049 | -2.96 | -1.325  | none       |
| GTF3C2   | 0.451  | 0.385   | 3.1196 | 0.01134 | 0.049 | -2.96 | -1.3554 | none       |
| WNT2B    | 0.23   | 0.1799  | 3.1196 | 0.01134 | 0.049 | -2.96 | -1.3908 | none       |
| RAP1B    | 0.304  | 0.136   | 3.1184 | 0.01136 | 0.049 | -2.96 | -0.5502 | none       |
| HNF4A    | 0.228  | 0.1837  | 3.1182 | 0.01136 | 0.049 | -2.96 | -0.688  | none       |
| TBK1     | 0.319  | 0.2548  | 3.1179 | 0.01137 | 0.049 | -2.96 | -0.0676 | none       |
| EMC2     | -0.48  | -0.4576 | -3.118 | 0.01137 | 0.049 | -2.96 | 0.75655 | none       |
| EMX2     | 0.229  | 0.18    | 3.1167 | 0.01139 | 0.05  | -2.97 | -0.8248 | none       |
| OR6C6    | 0.447  | 0.2684  | 3.1145 | 0.01143 | 0.05  | -2.97 | -1.1855 | none       |
| MED22    | 0.426  | 0.4087  | 3.114  | 0.01144 | 0.05  | -2.97 | -0.1538 | none       |
| RPS6KC1  | 0.423  | 0.3711  | 3.1139 | 0.01145 | 0.05  | -2.97 | -0.4671 | none       |
| GREM1    | 0.262  | 0.1871  | 3.1137 | 0.01145 | 0.05  | -2.97 | -1.5308 | none       |
| GPANK1   | 0.36   | 0.2406  | 3.1137 | 0.01145 | 0.05  | -2.97 | -0.7702 | none       |
| MOB3A    | 0.415  | 0.3644  | 3.1125 | 0.01147 | 0.05  | -2.97 | -0.9581 | none       |
| MED13L   | 0.681  | 0.6261  | 3.1125 | 0.01147 | 0.05  | -2.97 | -1.0804 | none       |
| FOXD1    | 0.462  | 0.4538  | 3.1122 | 0.01148 | 0.05  | -2.97 | 0.94744 | none       |
| CYP7B1   | 0.538  | 0.4     | 3.1117 | 0.01149 | 0.05  | -2.97 | -1.1463 | none       |
| CDIP1    | 0.367  | 0.3086  | 3.1117 | 0.01149 | 0.05  | -2.97 | -0.6163 | none       |
| SUMF2    | 0.447  | 0.3156  | 3.1117 | 0.01149 | 0.05  | -2.97 | -1.4787 | none       |
| PNRC2    | 0.261  | 0.1442  | 3.1115 | 0.01149 | 0.05  | -2.97 | -0.5612 | none       |
| LY75     | 0.4    | 0.3306  | 3.1115 | 0.01149 | 0.05  | -2.97 | -0.5164 | none       |
| FNDC3A   | 0.717  | 0.6241  | 3.1104 | 0.01151 | 0.05  | -2.98 | -1.2952 | none       |
| LRP2BP   | 0.375  | 0.2573  | 3.1103 | 0.01152 | 0.05  | -2.98 | -1.2764 | none       |
| H2AFZ    | -0.505 | -0.454  | -3.11  | 0.01152 | 0.05  | -2.98 | 1.82981 | none       |
| TYW3     | 0.421  | 0.3012  | 3.1095 | 0.01153 | 0.05  | -2.98 | -0.1853 | none       |
| ZNF517   | 0.625  | 0.479   | 3.1085 | 0.01155 | 0.05  | -2.98 | -1.2823 | none       |
| CALD1    | 1.058  | 0.8863  | 3.1075 | 0.01157 | 0.05  | -2.98 | -0.3026 | none       |
| STRADA   | 0.574  | 0.4448  | 3.107  | 0.01158 | 0.05  | -2.98 | -0.6524 | none       |
| AASDHPP1 | -0.469 | -0.3943 | -3.107 | 0.01158 | 0.05  | -2.98 | 2.23238 | AA-related |
| RGP1     | 0.231  | 0.1597  | 3.1061 | 0.0116  | 0.05  | -2.98 | -0.0416 | none       |
| MAP4K5   | 0.53   | 0.4777  | 3.1061 | 0.0116  | 0.05  | -2.98 | -0.4228 | none       |
| ZNF33B   | 0.478  | 0.3362  | 3.1057 | 0.0116  | 0.05  | -2.98 | -0.7993 | none       |
| EPS15    | 0.758  | 0.6387  | 3.1057 | 0.0116  | 0.05  | -2.98 | -0.7555 | none       |
| MAP2K2   | 0.493  | 0.4582  | 3.1043 | 0.01163 | 0.05  | -2.99 | -1.3537 | none       |
| ZEB2     | 0.386  | 0.3299  | 3.1041 | 0.01163 | 0.05  | -2.99 | -0.9338 | none       |
| AP3M1    | 0.285  | 0.1538  | 3.1033 | 0.01165 | 0.05  | -2.99 | 0.55284 | none       |
| NCKAP1L  | 0.418  | 0.352   | 3.1029 | 0.01166 | 0.05  | -2.99 | 0.06597 | none       |
| SPTLC1   | 0.458  | 0.2733  | 3.1018 | 0.01168 | 0.05  | -2.99 | -0.9719 | none       |

|           |        |         |        |         |       |       |         |            |
|-----------|--------|---------|--------|---------|-------|-------|---------|------------|
| CMC1      | -0.489 | -0.4591 | -3.101 | 0.0117  | 0.05  | -2.99 | 1.22942 | none       |
| DYNC1I1   | 0.487  | 0.3869  | 3.1005 | 0.01171 | 0.05  | -2.99 | -1.1026 | none       |
| AP4B1     | 0.277  | 0.1812  | 3.1005 | 0.01171 | 0.05  | -2.99 | -0.9314 | none       |
| NCBP3     | 0.421  | 0.361   | 3.1004 | 0.01171 | 0.05  | -2.99 | -0.3751 | none       |
| CREB3L2   | 0.444  | 0.3708  | 3.0999 | 0.01172 | 0.05  | -2.99 | -1.324  | none       |
| NHLRC3    | 0.445  | 0.2853  | 3.0998 | 0.01172 | 0.05  | -2.99 | -0.6741 | none       |
| TSEN54    | 0.317  | 0.2316  | 3.0997 | 0.01172 | 0.05  | -2.99 | -0.3892 | none       |
| ESRP1     | 0.89   | 0.6595  | 3.0997 | 0.01172 | 0.05  | -2.99 | -0.9654 | none       |
| BIK       | -0.535 | -0.4755 | -3.1   | 0.01172 | 0.05  | -2.99 | 0.83138 | none       |
| LSM12     | 0.322  | 0.2471  | 3.0991 | 0.01173 | 0.05  | -2.99 | -1.3993 | none       |
| SULF1     | 1.03   | 0.8787  | 3.0991 | 0.01173 | 0.05  | -2.99 | -0.1905 | none       |
| CD40      | 0.284  | 0.1188  | 3.0984 | 0.01175 | 0.051 | -3    | -0.9743 | none       |
| JMJD7-PLA | 0.506  | 0.4308  | 3.0981 | 0.01175 | 0.051 | -3    | -1.2637 | none       |
| HCN3      | 0.316  | 0.2207  | 3.0955 | 0.0118  | 0.051 | -3    | -0.8049 | none       |
| ZNF79     | 0.493  | 0.4183  | 3.0955 | 0.0118  | 0.051 | -3    | -0.1365 | none       |
| CUTC      | -0.329 | -0.3368 | -3.095 | 0.01181 | 0.051 | -3    | 2.28682 | AA-related |
| IRF3      | 0.423  | 0.3148  | 3.0945 | 0.01182 | 0.051 | -3    | -0.7155 | none       |
| ZNF280D   | -0.758 | -0.6868 | -3.094 | 0.01184 | 0.051 | -3    | 1.6027  | none       |
| GRIP1     | 0.484  | 0.3967  | 3.0934 | 0.01185 | 0.051 | -3    | -0.3186 | none       |
| LRRC29    | 0.683  | 0.5235  | 3.0928 | 0.01186 | 0.051 | -3.01 | -0.682  | none       |
| HECTD4    | 0.829  | 0.769   | 3.0927 | 0.01186 | 0.051 | -3.01 | -0.9824 | none       |
| DPY19L1   | -0.462 | -0.4519 | -3.092 | 0.01187 | 0.051 | -3.01 | 0.14977 | none       |
| ZNF558    | 0.626  | 0.4321  | 3.0917 | 0.01188 | 0.051 | -3.01 | -1.0395 | none       |
| EPAS1     | 0.715  | 0.6791  | 3.0914 | 0.01189 | 0.051 | -3.01 | -0.8894 | none       |
| RNF2      | 0.315  | 0.2117  | 3.0913 | 0.01189 | 0.051 | -3.01 | 0.24047 | none       |
| 10-Sep    | 0.799  | 0.6828  | 3.0912 | 0.01189 | 0.051 | -3.01 | -1.3236 | none       |
| TUBE1     | 0.399  | 0.2652  | 3.0911 | 0.01189 | 0.051 | -3.01 | 0.12129 | none       |
| MEIS3     | 0.489  | 0.365   | 3.091  | 0.01189 | 0.051 | -3.01 | -1.3113 | none       |
| NWD1      | 0.273  | 0.1832  | 3.0906 | 0.0119  | 0.051 | -3.01 | -1.3122 | none       |
| HEATR1    | 0.761  | 0.6421  | 3.0905 | 0.0119  | 0.051 | -3.01 | -0.875  | none       |
| LRRN2     | 0.372  | 0.271   | 3.0903 | 0.01191 | 0.051 | -3.01 | -1.4314 | none       |
| USP26     | 0.338  | 0.2597  | 3.0898 | 0.01192 | 0.051 | -3.01 | -0.2025 | none       |
| SP3       | 0.497  | 0.4271  | 3.0896 | 0.01192 | 0.051 | -3.01 | -0.0708 | none       |
| PARP16    | 0.456  | 0.3555  | 3.0894 | 0.01192 | 0.051 | -3.01 | -0.6998 | none       |
| IGLL5     | -0.528 | -0.4902 | -3.089 | 0.01192 | 0.051 | -3.01 | 1.48694 | none       |
| GSTP1     | -0.517 | -0.4932 | -3.089 | 0.01194 | 0.051 | -3.01 | 2.17157 | AA-related |
| DMGDH     | 0.751  | 0.5945  | 3.0884 | 0.01194 | 0.051 | -3.01 | -0.8126 | none       |
| MDM2      | 0.626  | 0.5286  | 3.0884 | 0.01195 | 0.051 | -3.01 | -1.2369 | none       |
| RRM2B     | 0.501  | 0.3686  | 3.0881 | 0.01195 | 0.051 | -3.01 | -1.1901 | none       |
| ABI3      | -0.366 | -0.2888 | -3.087 | 0.01197 | 0.051 | -3.01 | 2.44846 | AA-related |

|           |        |         |        |         |       |       |         |            |
|-----------|--------|---------|--------|---------|-------|-------|---------|------------|
| EID2B     | 1.081  | 0.84    | 3.0868 | 0.01198 | 0.051 | -3.02 | -0.5271 | none       |
| CCR6      | 0.457  | 0.27    | 3.0863 | 0.01199 | 0.051 | -3.02 | -0.4033 | none       |
| GALR2     | 0.414  | 0.2794  | 3.0861 | 0.01199 | 0.051 | -3.02 | -0.7104 | none       |
| CD300LD   | 0.436  | 0.3358  | 3.0861 | 0.01199 | 0.051 | -3.02 | -1.1414 | none       |
| CREB3L4   | 0.652  | 0.4923  | 3.0857 | 0.012   | 0.051 | -3.02 | -0.9488 | none       |
| MLLT11    | 0.258  | 0.1794  | 3.0856 | 0.012   | 0.051 | -3.02 | -0.8733 | none       |
| ABCF3     | 0.391  | 0.3937  | 3.0855 | 0.012   | 0.051 | -3.02 | -0.6943 | none       |
| BAG5      | 0.433  | 0.3487  | 3.0846 | 0.01202 | 0.051 | -3.02 | -0.5642 | none       |
| PHF6      | 0.426  | 0.3425  | 3.0841 | 0.01203 | 0.051 | -3.02 | -0.9539 | none       |
| GPR137C   | 0.542  | 0.4145  | 3.084  | 0.01203 | 0.051 | -3.02 | -0.5194 | none       |
| NABP2     | 0.307  | 0.1999  | 3.084  | 0.01203 | 0.051 | -3.02 | -1.1391 | none       |
| DENND6A   | 0.58   | 0.4468  | 3.0824 | 0.01207 | 0.051 | -3.02 | -0.3991 | none       |
| FAM169B   | 0.679  | 0.4931  | 3.0822 | 0.01207 | 0.051 | -3.02 | -1.3628 | none       |
| CFI       | 0.527  | 0.3648  | 3.0813 | 0.01209 | 0.051 | -3.02 | -1.402  | none       |
| TAGLN2    | -0.327 | -0.302  | -3.08  | 0.01211 | 0.052 | -3.03 | 2.11727 | AA-related |
| CDKAL1    | 0.449  | 0.347   | 3.0796 | 0.01212 | 0.052 | -3.03 | -1.5713 | OA-related |
| CHN1      | 0.521  | 0.3801  | 3.0792 | 0.01213 | 0.052 | -3.03 | -0.8068 | none       |
| ZNF778    | 0.588  | 0.6075  | 3.079  | 0.01214 | 0.052 | -3.03 | 0.99909 | none       |
| ZP3       | 0.503  | 0.3375  | 3.078  | 0.01215 | 0.052 | -3.03 | -1.2212 | none       |
| RBM8A     | -0.26  | -0.1909 | -3.078 | 0.01216 | 0.052 | -3.03 | 1.25778 | none       |
| RAB11FIP1 | 0.612  | 0.5469  | 3.0773 | 0.01217 | 0.052 | -3.03 | -1.2586 | none       |
| UBE2L6    | -0.352 | -0.3454 | -3.077 | 0.01218 | 0.052 | -3.03 | 2.03812 | none       |
| CDHR3     | 0.478  | 0.3358  | 3.0764 | 0.01219 | 0.052 | -3.03 | -0.92   | none       |
| RFESD     | -0.635 | -0.5728 | -3.075 | 0.01222 | 0.052 | -3.04 | 1.61095 | none       |
| EPHA4     | 0.617  | 0.5353  | 3.0741 | 0.01223 | 0.052 | -3.04 | -0.926  | none       |
| MARCO     | 0.321  | 0.3215  | 3.0739 | 0.01224 | 0.052 | -3.04 | 0.53088 | none       |
| ATP13A4   | 0.485  | 0.3443  | 3.0735 | 0.01225 | 0.052 | -3.04 | -1.3237 | none       |
| KIF18B    | 0.665  | 0.6417  | 3.0732 | 0.01225 | 0.052 | -3.04 | -1.0754 | none       |
| CA13      | 0.508  | 0.3832  | 3.073  | 0.01226 | 0.052 | -3.04 | -1.2671 | none       |
| DHX58     | 0.614  | 0.5767  | 3.0721 | 0.01228 | 0.052 | -3.04 | -0.5977 | none       |
| LONP1     | 0.675  | 0.6812  | 3.072  | 0.01228 | 0.052 | -3.04 | -1.1183 | none       |
| PNP       | -0.36  | -0.3612 | -3.072 | 0.01228 | 0.052 | -3.04 | 1.63485 | none       |
| SLC16A8   | 0.273  | 0.2429  | 3.0719 | 0.01228 | 0.052 | -3.04 | -0.3861 | none       |
| COASY     | 0.432  | 0.3148  | 3.0712 | 0.01229 | 0.052 | -3.04 | -0.8566 | none       |
| TGM5      | 0.281  | 0.2375  | 3.0709 | 0.0123  | 0.052 | -3.04 | -0.349  | none       |
| ZNF43     | 0.776  | 0.6502  | 3.0707 | 0.01231 | 0.052 | -3.04 | -1.3886 | none       |
| IPO8      | 0.741  | 0.6479  | 3.0706 | 0.01231 | 0.052 | -3.04 | -1.059  | none       |
| ZNF600    | 0.784  | 0.5904  | 3.0702 | 0.01231 | 0.052 | -3.04 | -0.0771 | none       |
| PECR      | 0.461  | 0.308   | 3.0678 | 0.01236 | 0.052 | -3.05 | -0.3113 | none       |
| PPIB      | -0.393 | -0.3508 | -3.068 | 0.01237 | 0.052 | -3.05 | 2.09331 | AA-related |

|          |        |         |        |         |       |       |         |            |
|----------|--------|---------|--------|---------|-------|-------|---------|------------|
| PICK1    | 0.588  | 0.501   | 3.0672 | 0.01238 | 0.052 | -3.05 | -1.0241 | none       |
| FAM167B  | 0.566  | 0.3984  | 3.0667 | 0.01239 | 0.052 | -3.05 | -1.1194 | none       |
| TCF7     | 0.557  | 0.4548  | 3.0662 | 0.0124  | 0.052 | -3.05 | -1.3123 | none       |
| USP24    | 0.84   | 0.7772  | 3.0661 | 0.0124  | 0.052 | -3.05 | -1.0387 | none       |
| MTMR10   | 0.46   | 0.4003  | 3.0655 | 0.01241 | 0.052 | -3.05 | -0.2699 | none       |
| INPP1    | 0.248  | 0.1999  | 3.0653 | 0.01242 | 0.052 | -3.05 | -0.3338 | none       |
| WDR83OS  | -0.477 | -0.4458 | -3.065 | 0.01242 | 0.052 | -3.05 | 2.51314 | AA-related |
| SCN11A   | 0.415  | 0.2905  | 3.0651 | 0.01242 | 0.052 | -3.05 | -1.2328 | none       |
| SLC27A5  | 0.469  | 0.3264  | 3.065  | 0.01242 | 0.052 | -3.05 | -0.4883 | none       |
| AC018638 | 1.058  | 0.9464  | 3.0639 | 0.01244 | 0.052 | -3.05 | -1.1004 | none       |
| RPS7     | -0.557 | -0.5346 | -3.063 | 0.01246 | 0.053 | -3.05 | 2.34343 | AA-related |
| COL27A1  | 0.511  | 0.4984  | 3.0626 | 0.01247 | 0.053 | -3.06 | -0.7441 | none       |
| DDX19B   | 0.344  | 0.2603  | 3.0624 | 0.01248 | 0.053 | -3.06 | -0.3644 | none       |
| RAMP1    | -0.382 | -0.3228 | -3.061 | 0.01251 | 0.053 | -3.06 | 0.46864 | none       |
| FBXW4    | 0.559  | 0.5071  | 3.0605 | 0.01252 | 0.053 | -3.06 | -1.261  | none       |
| WFDC11   | 0.45   | 0.3309  | 3.0602 | 0.01252 | 0.053 | -3.06 | -0.5413 | none       |
| PCBP1    | -0.246 | -0.222  | -3.06  | 0.01253 | 0.053 | -3.06 | 1.74092 | none       |
| ZNF587B  | 0.72   | 0.6818  | 3.0597 | 0.01253 | 0.053 | -3.06 | -1.1345 | none       |
| G3BP2    | 0.359  | 0.2275  | 3.0593 | 0.01254 | 0.053 | -3.06 | -0.9792 | none       |
| BMPR1A   | 0.452  | 0.3247  | 3.058  | 0.01257 | 0.053 | -3.06 | -1.2247 | none       |
| FAM84B   | 0.397  | 0.2611  | 3.0562 | 0.01261 | 0.053 | -3.07 | -0.6589 | none       |
| SGSM2    | 0.529  | 0.59    | 3.0538 | 0.01266 | 0.053 | -3.07 | 0.56417 | none       |
| ADARB2   | 0.352  | 0.2813  | 3.0533 | 0.01267 | 0.053 | -3.07 | -1.371  | none       |
| ZMYND19  | 0.387  | 0.4596  | 3.0522 | 0.01269 | 0.053 | -3.07 | -0.3084 | none       |
| HYOU1    | 0.593  | 0.5762  | 3.0517 | 0.0127  | 0.053 | -3.07 | -1.033  | none       |
| TRAM2    | 0.398  | 0.3677  | 3.0515 | 0.01271 | 0.053 | -3.07 | -0.8997 | none       |
| TSPAN19  | 0.6    | 0.398   | 3.0515 | 0.01271 | 0.053 | -3.07 | 0.04258 | none       |
| TEDDM1   | 0.331  | 0.2155  | 3.0507 | 0.01272 | 0.053 | -3.07 | -0.5929 | none       |
| CHST11   | 0.655  | 0.5337  | 3.0488 | 0.01277 | 0.054 | -3.08 | -0.2181 | none       |
| FCER2    | 0.477  | 0.4979  | 3.0487 | 0.01277 | 0.054 | -3.08 | -0.564  | none       |
| CYP46A1  | 0.475  | 0.3032  | 3.0481 | 0.01278 | 0.054 | -3.08 | -0.7197 | none       |
| IRAK4    | 0.483  | 0.4176  | 3.048  | 0.01278 | 0.054 | -3.08 | -1.0837 | none       |
| RAET1E   | 0.275  | 0.2102  | 3.0478 | 0.01279 | 0.054 | -3.08 | -1.4014 | none       |
| RHOF     | 0.279  | 0.2244  | 3.046  | 0.01283 | 0.054 | -3.08 | -0.7437 | none       |
| UBR4     | 0.755  | 0.7855  | 3.0454 | 0.01284 | 0.054 | -3.08 | -0.6765 | none       |
| SNRPC    | -0.323 | -0.2975 | -3.044 | 0.01287 | 0.054 | -3.09 | 2.47327 | AA-related |
| PTMA     | -0.311 | -0.2162 | -3.044 | 0.01287 | 0.054 | -3.09 | 1.36398 | none       |
| PIP5K1A  | 0.368  | 0.2904  | 3.0435 | 0.01288 | 0.054 | -3.09 | -1.3601 | none       |
| ATAD2    | 1.01   | 0.9456  | 3.0424 | 0.0129  | 0.054 | -3.09 | -1.3503 | none       |
| ZSCAN29  | 0.55   | 0.5505  | 3.0417 | 0.01292 | 0.054 | -3.09 | -1.046  | none       |



|          |        |         |        |         |       |       |         |            |
|----------|--------|---------|--------|---------|-------|-------|---------|------------|
| ATP2A2   | 0.589  | 0.5073  | 3.0413 | 0.01293 | 0.054 | -3.09 | -1.4545 | none       |
| RUNX1    | 0.664  | 0.5997  | 3.0411 | 0.01293 | 0.054 | -3.09 | -0.5723 | none       |
| TMX3     | 0.566  | 0.3579  | 3.0405 | 0.01294 | 0.054 | -3.09 | -1.1936 | none       |
| PIK3R2   | 0.613  | 0.5445  | 3.0399 | 0.01296 | 0.054 | -3.09 | -1.236  | none       |
| OR11G2   | 0.248  | 0.1718  | 3.0396 | 0.01296 | 0.054 | -3.09 | -1.3676 | none       |
| ACOX1    | 0.397  | 0.2508  | 3.0384 | 0.01299 | 0.054 | -3.1  | -1.0056 | none       |
| MTHFD2L  | 0.397  | 0.2795  | 3.0379 | 0.013   | 0.054 | -3.1  | -0.7002 | none       |
| CARMIL1  | 0.487  | 0.4516  | 3.0376 | 0.01301 | 0.054 | -3.1  | -1.2664 | none       |
| RAB38    | -0.755 | -0.6438 | -3.037 | 0.01301 | 0.054 | -3.1  | 2.74101 | AA-related |
| ABRA     | 0.31   | 0.2121  | 3.037  | 0.01302 | 0.054 | -3.1  | -1.4253 | none       |
| EBI3     | 0.441  | 0.3596  | 3.0365 | 0.01303 | 0.054 | -3.1  | -0.0883 | none       |
| CD33     | 0.446  | 0.2963  | 3.0362 | 0.01304 | 0.054 | -3.1  | -0.7872 | none       |
| DNM1     | 0.434  | 0.3317  | 3.0352 | 0.01306 | 0.054 | -3.1  | -0.6513 | none       |
| ABCC6    | 0.547  | 0.43    | 3.0351 | 0.01306 | 0.054 | -3.1  | -1.0192 | none       |
| NAMPT    | 0.307  | 0.2296  | 3.035  | 0.01306 | 0.054 | -3.1  | -0.7774 | none       |
| GLIPR1L2 | 0.42   | 0.311   | 3.0347 | 0.01307 | 0.054 | -3.1  | -1.5455 | OA-related |
| RARS2    | 0.299  | 0.1834  | 3.0347 | 0.01307 | 0.054 | -3.1  | -0.6595 | none       |
| COX16    | -0.538 | -0.5167 | -3.034 | 0.01308 | 0.054 | -3.1  | 1.12559 | none       |
| TCP11L2  | 0.459  | 0.355   | 3.0339 | 0.01309 | 0.055 | -3.1  | -0.2462 | none       |
| PLEKHA2  | 0.631  | 0.4882  | 3.0339 | 0.01309 | 0.055 | -3.1  | -1.2834 | none       |
| VCL      | 0.415  | 0.4183  | 3.0334 | 0.0131  | 0.055 | -3.1  | -0.4303 | none       |
| COX6C    | -0.461 | -0.4522 | -3.033 | 0.01311 | 0.055 | -3.1  | 2.38783 | AA-related |
| RAN      | -0.455 | -0.4066 | -3.033 | 0.01311 | 0.055 | -3.1  | 2.09659 | AA-related |
| ABRACL   | -0.479 | -0.4806 | -3.032 | 0.01312 | 0.055 | -3.11 | 1.58103 | none       |
| BORCS5   | -0.35  | -0.3024 | -3.032 | 0.01313 | 0.055 | -3.11 | 0.60287 | none       |
| TIGD7    | 0.821  | 0.6162  | 3.031  | 0.01315 | 0.055 | -3.11 | -1.2628 | none       |
| TRIOBP   | 0.395  | 0.4275  | 3.0301 | 0.01317 | 0.055 | -3.11 | -0.8478 | none       |
| SPSB1    | 0.583  | 0.5107  | 3.0298 | 0.01318 | 0.055 | -3.11 | 0.34035 | none       |
| DNAJB4   | 0.419  | 0.3465  | 3.0297 | 0.01318 | 0.055 | -3.11 | -0.8072 | none       |
| LYRM2    | 0.735  | 0.6067  | 3.0278 | 0.01322 | 0.055 | -3.11 | -0.947  | none       |
| DDIT4    | -0.384 | -0.2638 | -3.027 | 0.01323 | 0.055 | -3.11 | 2.01917 | none       |
| CISD1    | -0.329 | -0.3223 | -3.027 | 0.01324 | 0.055 | -3.11 | 1.84934 | none       |
| CCDC30   | 0.524  | 0.3768  | 3.0267 | 0.01325 | 0.055 | -3.11 | -1.2626 | none       |
| NDUFA8   | -0.359 | -0.3322 | -3.026 | 0.01325 | 0.055 | -3.12 | 1.75517 | none       |
| XKR4     | 0.281  | 0.2006  | 3.026  | 0.01326 | 0.055 | -3.12 | -1.3598 | none       |
| LGSN     | 0.381  | 0.2726  | 3.0249 | 0.01329 | 0.055 | -3.12 | -1.1804 | none       |
| FGL2     | 0.428  | 0.3056  | 3.0243 | 0.0133  | 0.055 | -3.12 | -1.1385 | none       |
| MAN2A2   | 0.712  | 0.6725  | 3.0236 | 0.01332 | 0.055 | -3.12 | -0.4301 | none       |
| KDM5B    | 0.713  | 0.6462  | 3.0232 | 0.01333 | 0.055 | -3.12 | -1.1953 | none       |
| SLC12A2  | 0.571  | 0.4761  | 3.0226 | 0.01334 | 0.055 | -3.12 | -1.5365 | OA-related |

|          |        |         |        |         |       |       |         |      |
|----------|--------|---------|--------|---------|-------|-------|---------|------|
| SCN7A    | 0.566  | 0.4102  | 3.0224 | 0.01334 | 0.055 | -3.12 | -1.1405 | none |
| YWHAB    | -0.336 | -0.293  | -3.022 | 0.01336 | 0.055 | -3.12 | 1.20521 | none |
| SH3TC1   | 0.359  | 0.3264  | 3.0216 | 0.01336 | 0.055 | -3.12 | -0.5207 | none |
| MX2      | 0.575  | 0.4886  | 3.0212 | 0.01337 | 0.055 | -3.12 | -0.9857 | none |
| YEATS2   | 0.898  | 0.9106  | 3.0198 | 0.0134  | 0.055 | -3.13 | -1.0223 | none |
| B3GNT8   | 0.396  | 0.2754  | 3.0198 | 0.0134  | 0.055 | -3.13 | -0.9387 | none |
| GLB1L3   | 0.402  | 0.2155  | 3.0194 | 0.01341 | 0.055 | -3.13 | -1.1978 | none |
| SH2D4A   | 0.752  | 0.7278  | 3.0187 | 0.01343 | 0.056 | -3.13 | -0.5877 | none |
| ADM2     | 0.363  | 0.2695  | 3.018  | 0.01344 | 0.056 | -3.13 | -1.095  | none |
| TMEM232  | 0.564  | 0.4307  | 3.0179 | 0.01344 | 0.056 | -3.13 | -0.7666 | none |
| ZC3HAV1  | 0.364  | 0.3252  | 3.0177 | 0.01345 | 0.056 | -3.13 | -1.3499 | none |
| CHRM5    | 0.253  | 0.2031  | 3.0171 | 0.01346 | 0.056 | -3.13 | -0.6985 | none |
| FMC1     | 0.713  | 0.4556  | 3.0168 | 0.01347 | 0.056 | -3.13 | -1.0579 | none |
| NDNF     | 0.473  | 0.276   | 3.016  | 0.01349 | 0.056 | -3.13 | -1.0883 | none |
| PRCC     | 0.408  | 0.3923  | 3.0158 | 0.01349 | 0.056 | -3.13 | -1.1217 | none |
| PAQR3    | 0.768  | 0.5269  | 3.0158 | 0.01349 | 0.056 | -3.13 | -0.7708 | none |
| ACSS1    | 0.371  | 0.2771  | 3.0153 | 0.0135  | 0.056 | -3.13 | -1.058  | none |
| ELK4     | 0.384  | 0.302   | 3.0147 | 0.01352 | 0.056 | -3.13 | -0.9628 | none |
| HAUS8    | 0.399  | 0.3719  | 3.0146 | 0.01352 | 0.056 | -3.13 | -0.8015 | none |
| PRICKLE1 | 0.741  | 0.4845  | 3.0128 | 0.01356 | 0.056 | -3.14 | -1.1092 | none |
| FAM47E   | 0.562  | 0.3517  | 3.0117 | 0.01359 | 0.056 | -3.14 | -1.0211 | none |
| MYPN     | 0.502  | 0.3753  | 3.0115 | 0.01359 | 0.056 | -3.14 | -1.0525 | none |
| MDM1     | 0.413  | 0.3534  | 3.0113 | 0.01359 | 0.056 | -3.14 | 0.61123 | none |
| NAIP     | 0.646  | 0.4988  | 3.0113 | 0.01359 | 0.056 | -3.14 | -0.8896 | none |
| ARHGAP1  | 0.574  | 0.5125  | 3.0104 | 0.01361 | 0.056 | -3.14 | -1.234  | none |
| RNF152   | 0.293  | 0.1918  | 3.0093 | 0.01364 | 0.056 | -3.14 | -1.4594 | none |
| TMEM268  | 0.406  | 0.3264  | 3.0086 | 0.01366 | 0.056 | -3.14 | -1.1478 | none |
| TMEM94   | 0.825  | 0.764   | 3.0084 | 0.01366 | 0.056 | -3.14 | -1.1037 | none |
| AGAP6    | 0.625  | 0.6437  | 3.0081 | 0.01367 | 0.056 | -3.15 | -0.2083 | none |
| RPGRIP1  | 0.573  | 0.5717  | 3.0071 | 0.01369 | 0.056 | -3.15 | -0.8894 | none |
| TEPSIN   | 0.594  | 0.5186  | 3.0069 | 0.01369 | 0.056 | -3.15 | -0.8907 | none |
| SF3B6    | -0.473 | -0.4673 | -3.007 | 0.0137  | 0.056 | -3.15 | 1.77353 | none |
| RGPD6    | 0.858  | 0.7472  | 3.0061 | 0.01371 | 0.056 | -3.15 | -1.1306 | none |
| CCM2     | 0.384  | 0.3167  | 3.0061 | 0.01371 | 0.056 | -3.15 | -1.0369 | none |
| LMLN     | 0.457  | 0.3837  | 3.0056 | 0.01373 | 0.056 | -3.15 | 0.03601 | none |
| FXYS5    | -0.36  | -0.3004 | -3.006 | 0.01373 | 0.056 | -3.15 | 1.76134 | none |
| RC3H1    | 0.803  | 0.7695  | 3.0053 | 0.01373 | 0.056 | -3.15 | -1.2726 | none |
| C1ORF56  | 0.459  | 0.3434  | 3.0053 | 0.01373 | 0.056 | -3.15 | -0.8057 | none |
| HAUS1    | 0.411  | 0.2553  | 3.0035 | 0.01377 | 0.057 | -3.15 | -1.1454 | none |
| PHTF2    | 0.404  | 0.3346  | 3.0034 | 0.01378 | 0.057 | -3.15 | -0.6915 | none |

|          |        |         |        |         |       |       |         |      |
|----------|--------|---------|--------|---------|-------|-------|---------|------|
| CCDC130  | 0.317  | 0.2997  | 3.0031 | 0.01378 | 0.057 | -3.15 | -0.8336 | none |
| DYRK1A   | 0.66   | 0.5659  | 3.0029 | 0.01379 | 0.057 | -3.15 | -1.2497 | none |
| CFDP1    | 0.546  | 0.4807  | 3.0025 | 0.0138  | 0.057 | -3.15 | -0.9241 | none |
| DSC3     | 0.243  | 0.1532  | 3.0024 | 0.0138  | 0.057 | -3.15 | -1.3241 | none |
| AUNIP    | 0.39   | 0.3299  | 3.0021 | 0.01381 | 0.057 | -3.16 | -0.7689 | none |
| NRDE2    | 0.602  | 0.5978  | 3.0019 | 0.01381 | 0.057 | -3.16 | -0.6595 | none |
| IL6R     | 0.358  | 0.313   | 3.0009 | 0.01383 | 0.057 | -3.16 | -0.1097 | none |
| LCMT2    | 0.315  | 0.2061  | 3.0004 | 0.01384 | 0.057 | -3.16 | 0.07775 | none |
| MCUR1    | 0.341  | 0.2433  | 3.0002 | 0.01385 | 0.057 | -3.16 | -0.1666 | none |
| BNIP1    | 0.638  | 0.4307  | 2.9997 | 0.01386 | 0.057 | -3.16 | -0.9577 | none |
| CNNM2    | 0.295  | 0.2308  | 2.9992 | 0.01387 | 0.057 | -3.16 | -1.2616 | none |
| NDST3    | 0.248  | 0.1704  | 2.997  | 0.01392 | 0.057 | -3.16 | -1.5224 | none |
| AC074141 | 0.392  | 0.2728  | 2.9968 | 0.01393 | 0.057 | -3.16 | -1.3191 | none |
| HARBI1   | 0.328  | 0.2129  | 2.9964 | 0.01394 | 0.057 | -3.16 | -1.0848 | none |
| DTNA     | 0.754  | 0.7195  | 2.9955 | 0.01396 | 0.057 | -3.17 | -0.6075 | none |
| MCM3AP   | 0.72   | 0.7005  | 2.994  | 0.01399 | 0.057 | -3.17 | -1.4326 | none |
| CCDC14   | 0.503  | 0.4556  | 2.9937 | 0.014   | 0.057 | -3.17 | -0.6037 | none |
| PDE7B    | 0.347  | 0.2697  | 2.9936 | 0.014   | 0.057 | -3.17 | -0.7331 | none |
| SKIDA1   | 0.51   | 0.4218  | 2.9933 | 0.01401 | 0.057 | -3.17 | -0.9558 | none |
| RSF1     | 0.499  | 0.4658  | 2.9931 | 0.01402 | 0.057 | -3.17 | -0.272  | none |
| CIITA    | 0.588  | 0.4778  | 2.9931 | 0.01402 | 0.057 | -3.17 | -0.7657 | none |
| C11ORF1  | 0.375  | 0.1479  | 2.9917 | 0.01405 | 0.057 | -3.17 | 0.34635 | none |
| TRIM61   | 0.277  | 0.2103  | 2.9916 | 0.01405 | 0.057 | -3.17 | 0.81573 | none |
| MRLN     | 0.688  | 0.4719  | 2.9912 | 0.01406 | 0.057 | -3.17 | -0.4    | none |
| ESRRG    | 0.411  | 0.3248  | 2.9911 | 0.01406 | 0.057 | -3.17 | -0.0701 | none |
| SMARCD3  | -0.284 | -0.1089 | -2.991 | 0.01406 | 0.057 | -3.17 | 0.2455  | none |
| MAGI3    | 0.285  | 0.2182  | 2.9904 | 0.01408 | 0.057 | -3.17 | 0.4947  | none |
| ATRIP    | 0.509  | 0.5183  | 2.9902 | 0.01409 | 0.057 | -3.17 | -0.4139 | none |
| SRSF7    | -0.484 | -0.4514 | -2.99  | 0.0141  | 0.057 | -3.18 | 2.06063 | none |
| NAA35    | 0.277  | 0.2316  | 2.9896 | 0.0141  | 0.057 | -3.18 | -0.1862 | none |
| FUK      | 0.394  | 0.2986  | 2.9894 | 0.0141  | 0.057 | -3.18 | -1.2785 | none |
| EML6     | 0.522  | 0.3601  | 2.9891 | 0.01411 | 0.057 | -3.18 | 0.04583 | none |
| CD248    | -0.216 | -0.1602 | -2.989 | 0.01412 | 0.057 | -3.18 | 0.92573 | none |
| FTH1     | -0.456 | -0.4178 | -2.988 | 0.01413 | 0.058 | -3.18 | 1.91723 | none |
| GPR85    | 0.679  | 0.4703  | 2.9878 | 0.01414 | 0.058 | -3.18 | -1.1827 | none |
| GPR22    | 0.281  | 0.2122  | 2.9875 | 0.01415 | 0.058 | -3.18 | -0.9687 | none |
| GCC2     | 0.694  | 0.6402  | 2.9875 | 0.01415 | 0.058 | -3.18 | -1.0947 | none |
| FAM3A    | 0.435  | 0.3369  | 2.9871 | 0.01416 | 0.058 | -3.18 | -1.4522 | none |
| HSF2BP   | -0.242 | -0.1791 | -2.986 | 0.01418 | 0.058 | -3.18 | 0.69251 | none |
| SRCIN1   | 0.322  | 0.2371  | 2.9859 | 0.01419 | 0.058 | -3.18 | -1.3485 | none |

|          |        |         |        |         |       |       |         |            |
|----------|--------|---------|--------|---------|-------|-------|---------|------------|
| RSPH9    | -0.23  | -0.1236 | -2.986 | 0.01419 | 0.058 | -3.18 | 1.53088 | none       |
| NR2C2    | 0.698  | 0.6261  | 2.9857 | 0.01419 | 0.058 | -3.18 | -0.9795 | none       |
| OFD1     | 0.678  | 0.6075  | 2.9852 | 0.0142  | 0.058 | -3.18 | -0.2041 | none       |
| LPAR4    | 0.686  | 0.4944  | 2.9849 | 0.01421 | 0.058 | -3.18 | -0.5962 | none       |
| H3F3A    | -0.575 | -0.5915 | -2.985 | 0.01421 | 0.058 | -3.18 | 1.93271 | none       |
| COG8     | 0.354  | 0.2886  | 2.9848 | 0.01421 | 0.058 | -3.18 | -1.2952 | none       |
| FYCO1    | 0.632  | 0.6268  | 2.9842 | 0.01423 | 0.058 | -3.18 | -1.0375 | none       |
| ZNF473   | 0.667  | 0.5483  | 2.9837 | 0.01424 | 0.058 | -3.19 | -0.7405 | none       |
| CNDP2    | 0.408  | 0.3723  | 2.9834 | 0.01425 | 0.058 | -3.19 | -0.4335 | none       |
| KMT5C    | 0.683  | 0.5846  | 2.9831 | 0.01425 | 0.058 | -3.19 | -1.3978 | none       |
| SMAD2    | 0.356  | 0.2277  | 2.9825 | 0.01427 | 0.058 | -3.19 | -0.3231 | none       |
| FAM149B1 | 0.603  | 0.4416  | 2.9824 | 0.01427 | 0.058 | -3.19 | -0.911  | none       |
| ERAP2    | 0.549  | 0.4953  | 2.9822 | 0.01428 | 0.058 | -3.19 | -1.1659 | none       |
| BZW2     | -0.276 | -0.2094 | -2.982 | 0.01428 | 0.058 | -3.19 | 2.05323 | none       |
| TBC1D9B  | 0.585  | 0.549   | 2.982  | 0.01428 | 0.058 | -3.19 | -0.8909 | none       |
| CPQ      | 0.507  | 0.4331  | 2.981  | 0.0143  | 0.058 | -3.19 | -0.4825 | none       |
| RGS17    | 0.332  | 0.2221  | 2.9788 | 0.01436 | 0.058 | -3.19 | -1.3744 | none       |
| CLYBL    | 0.405  | 0.3392  | 2.9786 | 0.01436 | 0.058 | -3.19 | -0.4771 | none       |
| CLIC2    | 0.577  | 0.4283  | 2.9763 | 0.01442 | 0.058 | -3.2  | -0.6229 | none       |
| LSM4     | -0.31  | -0.235  | -2.976 | 0.01442 | 0.058 | -3.2  | 1.29918 | none       |
| C19ORF47 | 0.487  | 0.3321  | 2.9761 | 0.01442 | 0.058 | -3.2  | -0.613  | none       |
| PMAIP1   | -0.343 | -0.3418 | -2.975 | 0.01444 | 0.058 | -3.2  | 2.11649 | AA-related |
| RMND1    | 0.431  | 0.327   | 2.9753 | 0.01444 | 0.058 | -3.2  | -0.8781 | none       |
| WWP2     | 0.634  | 0.5647  | 2.9749 | 0.01445 | 0.058 | -3.2  | -1.2103 | none       |
| SF3A2    | 0.671  | 0.6828  | 2.9728 | 0.0145  | 0.059 | -3.2  | -1.1177 | none       |
| BCAR1    | 0.289  | 0.2945  | 2.9725 | 0.01451 | 0.059 | -3.2  | -0.9496 | none       |
| EIF2A    | 0.396  | 0.3161  | 2.9724 | 0.01451 | 0.059 | -3.2  | -0.902  | none       |
| FAM118A  | 0.496  | 0.443   | 2.9719 | 0.01452 | 0.059 | -3.2  | -1.0737 | none       |
| VILL     | 0.464  | 0.4356  | 2.9717 | 0.01453 | 0.059 | -3.21 | -0.2409 | none       |
| EML3     | 0.36   | 0.3469  | 2.9712 | 0.01454 | 0.059 | -3.21 | -1.0725 | none       |
| ANKS1B   | 0.509  | 0.3188  | 2.9683 | 0.01461 | 0.059 | -3.21 | -1.1855 | none       |
| MREG     | 0.652  | 0.5485  | 2.9679 | 0.01462 | 0.059 | -3.21 | -1.0028 | none       |
| RAB33A   | -0.431 | -0.3861 | -2.968 | 0.01462 | 0.059 | -3.21 | 2.04025 | none       |
| HSPA12A  | 0.509  | 0.3979  | 2.9677 | 0.01463 | 0.059 | -3.21 | -1.3671 | none       |
| UVRAG    | 0.53   | 0.4099  | 2.9677 | 0.01463 | 0.059 | -3.21 | -1.2156 | none       |
| IGFLR1   | 0.528  | 0.3217  | 2.9671 | 0.01464 | 0.059 | -3.21 | -0.6348 | none       |
| BLOC1S1  | -0.406 | -0.3999 | -2.967 | 0.01465 | 0.059 | -3.21 | 1.79124 | none       |
| CHD5     | 0.374  | 0.3066  | 2.9655 | 0.01468 | 0.059 | -3.22 | -0.6477 | none       |
| HSBP1    | -0.499 | -0.4631 | -2.965 | 0.01468 | 0.059 | -3.22 | 1.57163 | none       |
| ZNF549   | 0.485  | 0.3962  | 2.9643 | 0.01471 | 0.059 | -3.22 | -1.0467 | none       |

|           |        |         |        |         |       |       |         |            |
|-----------|--------|---------|--------|---------|-------|-------|---------|------------|
| OR5AU1    | 0.226  | 0.1934  | 2.9636 | 0.01473 | 0.059 | -3.22 | -0.6376 | none       |
| 1-Mar     | 0.351  | 0.2638  | 2.9629 | 0.01475 | 0.059 | -3.22 | -1.1747 | none       |
| REM2      | -0.263 | -0.179  | -2.963 | 0.01475 | 0.059 | -3.22 | 2.44456 | AA-related |
| SIGLEC15  | 0.519  | 0.3757  | 2.9624 | 0.01476 | 0.059 | -3.22 | -0.7698 | none       |
| MOB1A     | 0.299  | 0.1609  | 2.9624 | 0.01476 | 0.059 | -3.22 | -1.0669 | none       |
| OXCT2     | -0.263 | -0.2069 | -2.962 | 0.01476 | 0.059 | -3.22 | 2.08827 | none       |
| PIK3C3    | 0.489  | 0.3391  | 2.9622 | 0.01476 | 0.059 | -3.22 | -0.7382 | none       |
| FAM156A   | 0.423  | 0.3997  | 2.9622 | 0.01476 | 0.059 | -3.22 | 0.45655 | none       |
| C16ORF95  | 0.514  | 0.3728  | 2.9618 | 0.01477 | 0.059 | -3.22 | -0.642  | none       |
| C11ORF98  | -0.262 | -0.1975 | -2.961 | 0.01478 | 0.059 | -3.22 | 1.09775 | none       |
| PHLDA1    | 0.398  | 0.393   | 2.9615 | 0.01478 | 0.059 | -3.22 | -0.0663 | none       |
| FXD7      | -0.361 | -0.3112 | -2.961 | 0.01478 | 0.059 | -3.22 | 1.5391  | none       |
| TMEM8B    | 0.36   | 0.2508  | 2.9612 | 0.01479 | 0.059 | -3.22 | -0.7476 | none       |
| TAT       | 0.387  | 0.2742  | 2.961  | 0.01479 | 0.059 | -3.22 | -1.3951 | none       |
| CX3CL1    | 0.232  | 0.146   | 2.961  | 0.01479 | 0.059 | -3.22 | -1.0872 | none       |
| MCTS1     | -0.525 | -0.5091 | -2.96  | 0.01483 | 0.059 | -3.23 | 2.39289 | AA-related |
| PLOD1     | 0.53   | 0.4673  | 2.9593 | 0.01483 | 0.059 | -3.23 | -0.5321 | none       |
| MTMR4     | 0.502  | 0.4893  | 2.9592 | 0.01484 | 0.059 | -3.23 | -1.0965 | none       |
| GLCE      | 0.354  | 0.2159  | 2.9592 | 0.01484 | 0.059 | -3.23 | -1.0351 | none       |
| TRAF3IP1  | 0.619  | 0.5454  | 2.9587 | 0.01485 | 0.059 | -3.23 | -0.7709 | none       |
| NAGA      | -0.261 | -0.1723 | -2.959 | 0.01485 | 0.059 | -3.23 | 1.88626 | none       |
| MSMP      | 0.348  | 0.1953  | 2.9587 | 0.01485 | 0.059 | -3.23 | -0.4588 | none       |
| LIPE      | 0.664  | 0.583   | 2.9587 | 0.01485 | 0.059 | -3.23 | -1.2363 | none       |
| ALDH4A1   | -0.286 | -0.1897 | -2.959 | 0.01485 | 0.059 | -3.23 | 2.15939 | AA-related |
| BCAS3     | 0.458  | 0.3023  | 2.9579 | 0.01487 | 0.059 | -3.23 | -0.8586 | none       |
| ZNF264    | 0.372  | 0.2378  | 2.9577 | 0.01488 | 0.06  | -3.23 | -1.1176 | none       |
| C16ORF45  | 0.4    | 0.3312  | 2.9567 | 0.0149  | 0.06  | -3.23 | -0.9199 | none       |
| TBX19     | 0.424  | 0.3134  | 2.9565 | 0.01491 | 0.06  | -3.23 | -0.6312 | none       |
| WSCD2     | 0.307  | 0.3346  | 2.9565 | 0.01491 | 0.06  | -3.23 | 1.23423 | none       |
| NLRC3     | 0.634  | 0.6197  | 2.956  | 0.01492 | 0.06  | -3.23 | -0.5554 | none       |
| EPHX2     | 0.36   | 0.3069  | 2.956  | 0.01492 | 0.06  | -3.23 | -0.4062 | none       |
| MOCS2     | -0.397 | -0.3717 | -2.956 | 0.01492 | 0.06  | -3.23 | 1.90832 | none       |
| RSBN1L    | 0.613  | 0.5362  | 2.9555 | 0.01493 | 0.06  | -3.23 | -0.9371 | none       |
| CD300LG   | 0.614  | 0.4202  | 2.9551 | 0.01494 | 0.06  | -3.23 | -0.6954 | none       |
| OR10K2    | 0.335  | 0.2613  | 2.9545 | 0.01496 | 0.06  | -3.23 | -1.2607 | none       |
| ELP3      | 0.336  | 0.2071  | 2.9541 | 0.01497 | 0.06  | -3.23 | -0.7552 | none       |
| TXNDC11   | 0.308  | 0.2679  | 2.9536 | 0.01498 | 0.06  | -3.24 | -0.8811 | none       |
| HIST1H2BI | 0.436  | 0.2786  | 2.9529 | 0.015   | 0.06  | -3.24 | -1.2819 | none       |
| CHRNA3    | 0.45   | 0.3553  | 2.9524 | 0.01501 | 0.06  | -3.24 | -1.1253 | none       |
| LANCL3    | 0.315  | 0.2269  | 2.9519 | 0.01502 | 0.06  | -3.24 | -1.2157 | none       |

|          |        |         |        |         |       |       |         |            |
|----------|--------|---------|--------|---------|-------|-------|---------|------------|
| BMP8B    | 0.239  | 0.202   | 2.9518 | 0.01502 | 0.06  | -3.24 | -0.9968 | none       |
| RAD54L2  | 0.694  | 0.6727  | 2.9516 | 0.01503 | 0.06  | -3.24 | -1.2235 | none       |
| ITGA2    | 0.373  | 0.3031  | 2.9516 | 0.01503 | 0.06  | -3.24 | -1.0927 | none       |
| CTHRC1   | -0.352 | -0.2436 | -2.951 | 0.01505 | 0.06  | -3.24 | 1.45693 | none       |
| STRIP2   | 0.42   | 0.4365  | 2.9504 | 0.01506 | 0.06  | -3.24 | -0.6286 | none       |
| PSIP1    | 0.555  | 0.5309  | 2.9499 | 0.01507 | 0.06  | -3.24 | -1.0309 | none       |
| NHSL1    | 0.596  | 0.4655  | 2.9495 | 0.01508 | 0.06  | -3.24 | -0.5105 | none       |
| DDX23    | 0.792  | 0.741   | 2.9494 | 0.01509 | 0.06  | -3.24 | -0.9486 | none       |
| ZC3H7B   | 0.789  | 0.7981  | 2.9488 | 0.0151  | 0.06  | -3.24 | -0.9694 | none       |
| TMEM30B  | 0.258  | 0.2026  | 2.9487 | 0.0151  | 0.06  | -3.24 | -0.118  | none       |
| TRMT5    | -0.401 | -0.3155 | -2.948 | 0.01511 | 0.06  | -3.24 | 0.65492 | none       |
| TTL      | 0.531  | 0.4791  | 2.948  | 0.01512 | 0.06  | -3.24 | -0.7652 | none       |
| EPHX4    | 0.391  | 0.2167  | 2.9476 | 0.01513 | 0.06  | -3.25 | -0.1079 | none       |
| IDNK     | 0.253  | 0.1001  | 2.9474 | 0.01514 | 0.06  | -3.25 | -0.8516 | none       |
| SLC8B1   | 0.229  | 0.1601  | 2.9466 | 0.01516 | 0.06  | -3.25 | 0.08983 | none       |
| ZC3H14   | 0.719  | 0.6237  | 2.9461 | 0.01517 | 0.06  | -3.25 | -0.625  | none       |
| CDC42SE1 | -0.215 | -0.1869 | -2.945 | 0.01519 | 0.06  | -3.25 | 2.30195 | AA-related |
| TPRN     | -0.418 | -0.2946 | -2.945 | 0.01519 | 0.06  | -3.25 | 0.43839 | none       |
| UBE2C    | -0.348 | -0.325  | -2.945 | 0.01519 | 0.06  | -3.25 | 2.15082 | AA-related |
| BBS1     | 0.784  | 0.6728  | 2.9452 | 0.01519 | 0.06  | -3.25 | -1.1527 | none       |
| SAMD7    | 0.44   | 0.294   | 2.9451 | 0.01519 | 0.06  | -3.25 | -0.7748 | none       |
| DFFA     | 0.352  | 0.2317  | 2.9446 | 0.01521 | 0.06  | -3.25 | -1.2131 | none       |
| CNTROB   | 0.627  | 0.6239  | 2.9444 | 0.01521 | 0.06  | -3.25 | -0.646  | none       |
| ANAPC7   | 0.344  | 0.2771  | 2.9434 | 0.01524 | 0.06  | -3.25 | -0.7656 | none       |
| CIPC     | 0.381  | 0.3051  | 2.9422 | 0.01527 | 0.06  | -3.25 | -1.0592 | none       |
| PDIK1L   | 0.368  | 0.2723  | 2.9422 | 0.01527 | 0.06  | -3.25 | -1.0646 | none       |
| FBXO46   | 0.523  | 0.442   | 2.9422 | 0.01527 | 0.06  | -3.25 | -0.901  | none       |
| CCNJ     | 0.355  | 0.2753  | 2.9417 | 0.01528 | 0.061 | -3.25 | -0.51   | none       |
| ERCC8    | 0.451  | 0.2751  | 2.9411 | 0.0153  | 0.061 | -3.26 | -0.454  | none       |
| NDUFA3   | 0.63   | 0.4078  | 2.9409 | 0.0153  | 0.061 | -3.26 | -0.7625 | none       |
| AVEN     | 0.44   | 0.3755  | 2.9406 | 0.01531 | 0.061 | -3.26 | -0.8074 | none       |
| IPO13    | 0.425  | 0.4921  | 2.9398 | 0.01533 | 0.061 | -3.26 | -0.1169 | none       |
| HPRT1    | -0.496 | -0.4603 | -2.94  | 0.01533 | 0.061 | -3.26 | 1.89178 | none       |
| TMEM245  | 0.38   | 0.2982  | 2.9388 | 0.01535 | 0.061 | -3.26 | -0.2255 | none       |
| HS3ST3B1 | 0.455  | 0.394   | 2.9385 | 0.01536 | 0.061 | -3.26 | -1.4242 | none       |
| PSME2    | -0.37  | -0.3145 | -2.938 | 0.01537 | 0.061 | -3.26 | 1.2408  | none       |
| HELZ     | 0.536  | 0.4889  | 2.9379 | 0.01538 | 0.061 | -3.26 | -1.0266 | none       |
| VPS36    | 0.403  | 0.3133  | 2.937  | 0.0154  | 0.061 | -3.26 | -0.6242 | none       |
| MYOM3    | 0.318  | 0.2398  | 2.9368 | 0.01541 | 0.061 | -3.26 | -1.2568 | none       |
| AGO3     | 0.297  | 0.2712  | 2.9363 | 0.01542 | 0.061 | -3.26 | 0.43637 | none       |

|          |        |         |        |         |       |       |         |            |
|----------|--------|---------|--------|---------|-------|-------|---------|------------|
| B3GNT5   | 0.509  | 0.4529  | 2.9359 | 0.01543 | 0.061 | -3.26 | -0.5007 | none       |
| SUPT20H  | 0.353  | 0.3205  | 2.9356 | 0.01544 | 0.061 | -3.26 | 0.17806 | none       |
| HSF2     | -0.566 | -0.4598 | -2.935 | 0.01544 | 0.061 | -3.27 | 2.13756 | AA-related |
| NUP50    | 0.7    | 0.6149  | 2.9351 | 0.01545 | 0.061 | -3.27 | -1.1079 | none       |
| PEX1     | 0.405  | 0.3924  | 2.933  | 0.01551 | 0.061 | -3.27 | -0.0708 | none       |
| NEGR1    | 0.324  | 0.2627  | 2.9328 | 0.01551 | 0.061 | -3.27 | -1.3043 | none       |
| SNTA1    | -0.224 | -0.1888 | -2.933 | 0.01551 | 0.061 | -3.27 | 1.1977  | none       |
| MACROD1  | -0.643 | -0.3686 | -2.933 | 0.01552 | 0.061 | -3.27 | 0.89643 | none       |
| PLEKHA7  | 0.682  | 0.6629  | 2.9326 | 0.01552 | 0.061 | -3.27 | -0.087  | none       |
| FAM133B  | 0.566  | 0.4507  | 2.9318 | 0.01554 | 0.061 | -3.27 | -1.1863 | none       |
| HTN3     | 0.453  | 0.328   | 2.9312 | 0.01555 | 0.061 | -3.27 | -0.8826 | none       |
| NECAB3   | 0.477  | 0.3383  | 2.9312 | 0.01555 | 0.061 | -3.27 | -1.3507 | none       |
| EMC1     | 0.428  | 0.4132  | 2.9308 | 0.01556 | 0.061 | -3.27 | -0.8419 | none       |
| SIMC1    | 0.594  | 0.5662  | 2.9302 | 0.01558 | 0.061 | -3.27 | -0.4109 | none       |
| MSR1     | 0.617  | 0.488   | 2.929  | 0.01561 | 0.061 | -3.28 | -0.3571 | none       |
| EPB41    | 0.905  | 0.8471  | 2.928  | 0.01564 | 0.062 | -3.28 | -0.951  | none       |
| MZT2A    | 0.404  | 0.3146  | 2.9273 | 0.01566 | 0.062 | -3.28 | -1.1476 | none       |
| HDGF     | -0.324 | -0.1991 | -2.927 | 0.01566 | 0.062 | -3.28 | 1.07444 | none       |
| SLC40A1  | 0.302  | 0.2406  | 2.9268 | 0.01567 | 0.062 | -3.28 | -0.6484 | none       |
| SUMO2    | -0.478 | -0.487  | -2.927 | 0.01567 | 0.062 | -3.28 | 1.66083 | none       |
| HILPDA   | 0.461  | 0.3603  | 2.9268 | 0.01567 | 0.062 | -3.28 | -0.1381 | none       |
| TTC39C   | 0.417  | 0.2259  | 2.9264 | 0.01568 | 0.062 | -3.28 | -1.0937 | none       |
| BTBD9    | 0.407  | 0.4558  | 2.9256 | 0.0157  | 0.062 | -3.28 | -0.5318 | none       |
| TBCCD1   | 0.549  | 0.3799  | 2.9255 | 0.0157  | 0.062 | -3.28 | -1.3625 | none       |
| PNCK     | 0.431  | 0.407   | 2.9251 | 0.01571 | 0.062 | -3.28 | -0.3364 | none       |
| RPS10-NU | 0.511  | 0.3701  | 2.9247 | 0.01572 | 0.062 | -3.28 | -1.1272 | none       |
| NBPF10   | 0.366  | 0.3971  | 2.9246 | 0.01573 | 0.062 | -3.28 | 0.09595 | none       |
| HGSNAT   | 0.582  | 0.3359  | 2.9245 | 0.01573 | 0.062 | -3.28 | -1.0778 | none       |
| R3HCC1L  | 0.778  | 0.6794  | 2.9245 | 0.01573 | 0.062 | -3.28 | -1.3828 | none       |
| CARD8    | 0.397  | 0.2844  | 2.9242 | 0.01574 | 0.062 | -3.28 | -1.041  | none       |
| TUBA1B   | -0.596 | -0.5735 | -2.924 | 0.01575 | 0.062 | -3.28 | 2.10906 | AA-related |
| FAM135A  | 0.604  | 0.4045  | 2.9231 | 0.01577 | 0.062 | -3.29 | -0.7757 | none       |
| CXCL12   | -0.268 | -0.1528 | -2.923 | 0.01577 | 0.062 | -3.29 | 1.20617 | none       |
| ZBP2     | 0.416  | 0.269   | 2.9229 | 0.01577 | 0.062 | -3.29 | -1.1828 | none       |
| ESCO1    | 0.596  | 0.5418  | 2.9216 | 0.01581 | 0.062 | -3.29 | -0.6619 | none       |
| CCP110   | 0.82   | 0.859   | 2.9212 | 0.01582 | 0.062 | -3.29 | -0.4451 | none       |
| GALNT7   | 0.355  | 0.3374  | 2.9212 | 0.01582 | 0.062 | -3.29 | -0.4576 | none       |
| USP49    | 0.577  | 0.4884  | 2.9211 | 0.01582 | 0.062 | -3.29 | -1.4895 | none       |
| ATP6V1B2 | 0.264  | 0.1527  | 2.921  | 0.01582 | 0.062 | -3.29 | -0.8301 | none       |
| DNAJB14  | 0.427  | 0.3494  | 2.9196 | 0.01586 | 0.062 | -3.29 | -0.7685 | none       |

|           |        |         |        |         |       |       |         |            |
|-----------|--------|---------|--------|---------|-------|-------|---------|------------|
| TUBA1C    | -0.513 | -0.5095 | -2.918 | 0.0159  | 0.062 | -3.29 | 1.55699 | none       |
| ARL2      | 0.315  | 0.2516  | 2.9178 | 0.01591 | 0.062 | -3.29 | -1.1686 | none       |
| ELF2      | 0.434  | 0.4263  | 2.9174 | 0.01592 | 0.062 | -3.29 | -0.6441 | none       |
| TMEM175   | 0.37   | 0.3015  | 2.9171 | 0.01593 | 0.062 | -3.3  | -0.7579 | none       |
| NAPSA     | -0.422 | -0.3213 | -2.917 | 0.01593 | 0.062 | -3.3  | 2.33528 | AA-related |
| HOMER3    | 0.323  | 0.196   | 2.9165 | 0.01594 | 0.062 | -3.3  | -0.2968 | none       |
| BCAT1     | 0.38   | 0.2451  | 2.9161 | 0.01595 | 0.062 | -3.3  | -0.9603 | none       |
| ACVR1     | 0.36   | 0.2694  | 2.9161 | 0.01595 | 0.062 | -3.3  | 0.70557 | none       |
| ARSD      | 0.664  | 0.5028  | 2.9149 | 0.01599 | 0.062 | -3.3  | -1.1521 | none       |
| MMRN2     | 0.433  | 0.3298  | 2.9148 | 0.01599 | 0.062 | -3.3  | -1.1046 | none       |
| PLP2      | -0.353 | -0.3372 | -2.915 | 0.01599 | 0.062 | -3.3  | 2.51941 | AA-related |
| FDFT1     | -0.289 | -0.2342 | -2.914 | 0.01601 | 0.062 | -3.3  | 2.26655 | AA-related |
| AOAH      | 0.758  | 0.6702  | 2.914  | 0.01601 | 0.062 | -3.3  | -0.6871 | none       |
| DDX17     | 0.258  | 0.2393  | 2.9136 | 0.01602 | 0.062 | -3.3  | -0.2346 | none       |
| CHST2     | -0.308 | -0.2383 | -2.913 | 0.01603 | 0.062 | -3.3  | 1.89055 | none       |
| GCK       | 0.252  | 0.2371  | 2.9133 | 0.01603 | 0.062 | -3.3  | 0.15561 | none       |
| FRMPD2    | 0.378  | 0.2663  | 2.9128 | 0.01604 | 0.063 | -3.3  | -1.2008 | none       |
| ABCE1     | 0.241  | 0.1978  | 2.9117 | 0.01607 | 0.063 | -3.3  | -0.1365 | none       |
| FNIP1     | 0.448  | 0.3841  | 2.9102 | 0.01611 | 0.063 | -3.31 | -1.1785 | none       |
| VPS8      | 0.435  | 0.3694  | 2.9091 | 0.01614 | 0.063 | -3.31 | -0.7976 | none       |
| WFS1      | 0.347  | 0.2727  | 2.909  | 0.01615 | 0.063 | -3.31 | 0.21558 | none       |
| CHD1      | 0.981  | 0.9293  | 2.9086 | 0.01616 | 0.063 | -3.31 | -0.9469 | none       |
| HSD11B1   | -0.305 | -0.3396 | -2.908 | 0.01618 | 0.063 | -3.31 | 1.91892 | none       |
| PPP1R3B   | 0.475  | 0.3953  | 2.9078 | 0.01618 | 0.063 | -3.31 | -0.6492 | none       |
| TNFAIP8L2 | -0.394 | -0.2662 | -2.907 | 0.01621 | 0.063 | -3.31 | 2.32394 | AA-related |
| GAS6      | 0.45   | 0.3058  | 2.9061 | 0.01622 | 0.063 | -3.31 | 0.40404 | none       |
| LCORL     | 0.425  | 0.3474  | 2.9054 | 0.01624 | 0.063 | -3.31 | -0.3929 | none       |
| PKHD1L1   | 0.35   | 0.2736  | 2.9048 | 0.01626 | 0.063 | -3.32 | -0.8122 | none       |
| PPP2R5C   | 0.231  | 0.1231  | 2.9048 | 0.01626 | 0.063 | -3.32 | -1.2045 | none       |
| C1QTNF2   | 0.414  | 0.2784  | 2.9047 | 0.01626 | 0.063 | -3.32 | -1.1731 | none       |
| SYNE3     | 0.582  | 0.5914  | 2.9038 | 0.01629 | 0.063 | -3.32 | -0.8066 | none       |
| CCDC167   | -0.403 | -0.3976 | -2.904 | 0.01629 | 0.063 | -3.32 | 1.16472 | none       |
| ZFP64     | 0.556  | 0.5229  | 2.9031 | 0.01631 | 0.063 | -3.32 | -1.1618 | none       |
| CCDC62    | 0.383  | 0.2685  | 2.903  | 0.01631 | 0.063 | -3.32 | -0.8163 | none       |
| MCMBP     | 0.253  | 0.1641  | 2.9028 | 0.01632 | 0.063 | -3.32 | -0.4254 | none       |
| MSL2      | 0.302  | 0.2175  | 2.9017 | 0.01634 | 0.063 | -3.32 | -0.5256 | none       |
| OVCA2     | -0.83  | -0.6737 | -2.902 | 0.01634 | 0.063 | -3.32 | 2.25464 | AA-related |
| CHIT1     | -0.474 | -0.3505 | -2.901 | 0.01636 | 0.063 | -3.32 | 2.41806 | AA-related |
| CELF1     | 0.345  | 0.3513  | 2.8989 | 0.01642 | 0.064 | -3.33 | 0.04376 | none       |
| ZSCAN16   | -0.552 | -0.3859 | -2.899 | 0.01643 | 0.064 | -3.33 | 2.08578 | none       |



|         |        |         |        |         |       |       |         |            |
|---------|--------|---------|--------|---------|-------|-------|---------|------------|
| SLC12A1 | 0.301  | 0.2281  | 2.8986 | 0.01643 | 0.064 | -3.33 | -1.2394 | none       |
| WDR34   | -0.319 | -0.2718 | -2.899 | 0.01643 | 0.064 | -3.33 | 2.27137 | AA-related |
| ADK     | -0.304 | -0.2513 | -2.899 | 0.01643 | 0.064 | -3.33 | 2.35004 | AA-related |
| SASH1   | 0.27   | 0.2091  | 2.8979 | 0.01645 | 0.064 | -3.33 | 0.20351 | none       |
| AGK     | 0.352  | 0.3101  | 2.8978 | 0.01645 | 0.064 | -3.33 | -0.0418 | none       |
| NUDT9   | 0.546  | 0.4357  | 2.8975 | 0.01646 | 0.064 | -3.33 | -1.3628 | none       |
| PRDX2   | -0.351 | -0.2994 | -2.897 | 0.01647 | 0.064 | -3.33 | 0.6446  | none       |
| PHF3    | 0.955  | 0.9343  | 2.8968 | 0.01648 | 0.064 | -3.33 | -0.8511 | none       |
| CARM1   | 0.531  | 0.5418  | 2.896  | 0.0165  | 0.064 | -3.33 | 0.20215 | none       |
| RBBP9   | 0.556  | 0.4181  | 2.8957 | 0.01651 | 0.064 | -3.33 | 0.29515 | none       |
| FAM83G  | 0.397  | 0.3919  | 2.8948 | 0.01654 | 0.064 | -3.33 | -0.5975 | none       |
| OXCT1   | 0.339  | 0.2592  | 2.8946 | 0.01654 | 0.064 | -3.33 | -0.0373 | none       |
| BRD8    | 0.795  | 0.7722  | 2.8933 | 0.01658 | 0.064 | -3.33 | -1.1804 | none       |
| IFIT3   | 0.307  | 0.1961  | 2.8932 | 0.01658 | 0.064 | -3.33 | -0.7935 | none       |
| SMC6    | 0.857  | 0.8264  | 2.8928 | 0.01659 | 0.064 | -3.34 | -0.1009 | none       |
| ARID4A  | 0.647  | 0.5239  | 2.8923 | 0.01661 | 0.064 | -3.34 | -1.1596 | none       |
| CD160   | 0.552  | 0.4765  | 2.892  | 0.01661 | 0.064 | -3.34 | -0.5469 | none       |
| CINP    | 0.418  | 0.278   | 2.8917 | 0.01662 | 0.064 | -3.34 | -0.208  | none       |
| ZNF419  | 0.37   | 0.2685  | 2.8916 | 0.01663 | 0.064 | -3.34 | -1.0855 | none       |
| BRICD5  | 0.689  | 0.6538  | 2.8911 | 0.01664 | 0.064 | -3.34 | -1.2731 | none       |
| CCDC39  | 0.372  | 0.2641  | 2.8896 | 0.01668 | 0.064 | -3.34 | -0.7502 | none       |
| VPS4B   | 0.346  | 0.2224  | 2.8888 | 0.0167  | 0.064 | -3.34 | -1.0759 | none       |
| HSPA1A  | -0.362 | -0.2748 | -2.888 | 0.01672 | 0.064 | -3.34 | 0.50508 | none       |
| MCOLN2  | 0.511  | 0.3292  | 2.8873 | 0.01675 | 0.065 | -3.34 | -1.0199 | none       |
| POP5    | 0.333  | 0.213   | 2.8871 | 0.01675 | 0.065 | -3.34 | -1.2188 | none       |
| UAP1L1  | 0.367  | 0.3039  | 2.8869 | 0.01676 | 0.065 | -3.35 | -0.9107 | none       |
| POLR3GL | -0.254 | -0.2284 | -2.887 | 0.01676 | 0.065 | -3.35 | 1.22837 | none       |
| PSMA2   | -0.44  | -0.3891 | -2.886 | 0.01679 | 0.065 | -3.35 | 1.07435 | none       |
| GTDC1   | 0.386  | 0.305   | 2.8855 | 0.0168  | 0.065 | -3.35 | -0.6433 | none       |
| APOF    | 0.315  | 0.2289  | 2.8853 | 0.0168  | 0.065 | -3.35 | -1.1847 | none       |
| TDRD9   | 0.492  | 0.3779  | 2.885  | 0.01681 | 0.065 | -3.35 | -0.9332 | none       |
| PHLPP1  | 0.764  | 0.6765  | 2.8844 | 0.01683 | 0.065 | -3.35 | -1.0676 | none       |
| UBQLN2  | 0.395  | 0.3355  | 2.8833 | 0.01686 | 0.065 | -3.35 | 0.10741 | none       |
| SLCO4A1 | 0.283  | 0.2889  | 2.8831 | 0.01687 | 0.065 | -3.35 | 0.26743 | none       |
| TAF1A   | 0.398  | 0.2306  | 2.8831 | 0.01687 | 0.065 | -3.35 | -0.6838 | none       |
| GALNT4  | 0.347  | 0.2324  | 2.883  | 0.01687 | 0.065 | -3.35 | -0.8258 | none       |
| MTERF2  | 0.41   | 0.3428  | 2.8827 | 0.01688 | 0.065 | -3.35 | 0.87578 | none       |
| KLHL6   | 0.54   | 0.4918  | 2.8825 | 0.01688 | 0.065 | -3.35 | -1.3664 | none       |
| TEX2    | 0.526  | 0.5267  | 2.8821 | 0.01689 | 0.065 | -3.35 | -1.1521 | none       |
| STK31   | 0.442  | 0.3661  | 2.8813 | 0.01692 | 0.065 | -3.35 | -1.0115 | none       |

|          |        |         |        |         |       |       |         |            |
|----------|--------|---------|--------|---------|-------|-------|---------|------------|
| BEAN1    | 0.466  | 0.3765  | 2.881  | 0.01693 | 0.065 | -3.35 | -1.2383 | none       |
| SLC22A4  | 0.258  | 0.1376  | 2.8807 | 0.01693 | 0.065 | -3.36 | -0.4467 | none       |
| WDR61    | -0.446 | -0.4146 | -2.881 | 0.01694 | 0.065 | -3.36 | 2.18562 | AA-related |
| CACTIN   | 0.594  | 0.5924  | 2.8794 | 0.01697 | 0.065 | -3.36 | -1.1592 | none       |
| ECHS1    | -0.299 | -0.2303 | -2.879 | 0.01697 | 0.065 | -3.36 | 2.05634 | none       |
| MKRN3    | 0.503  | 0.3691  | 2.8794 | 0.01697 | 0.065 | -3.36 | -1.0622 | none       |
| SPCS3    | -0.475 | -0.4234 | -2.879 | 0.01698 | 0.065 | -3.36 | 2.1637  | AA-related |
| CYFIP2   | 0.609  | 0.5753  | 2.8789 | 0.01698 | 0.065 | -3.36 | -0.8359 | none       |
| MTA3     | 0.398  | 0.2632  | 2.8786 | 0.01699 | 0.065 | -3.36 | -0.8606 | none       |
| CRCP     | 0.729  | 0.6759  | 2.8786 | 0.01699 | 0.065 | -3.36 | -0.6566 | none       |
| PCNX4    | 0.359  | 0.2775  | 2.8783 | 0.017   | 0.065 | -3.36 | -0.981  | none       |
| NPPA     | -0.324 | -0.257  | -2.878 | 0.01702 | 0.065 | -3.36 | 1.30793 | none       |
| HAVCR1   | 0.602  | 0.4327  | 2.8768 | 0.01705 | 0.065 | -3.36 | -1.0928 | none       |
| OMD      | 0.386  | 0.3011  | 2.8765 | 0.01706 | 0.065 | -3.36 | -1.0132 | none       |
| PIK3CB   | 0.649  | 0.592   | 2.8761 | 0.01707 | 0.065 | -3.36 | -1.2738 | none       |
| STAM     | 0.336  | 0.1928  | 2.876  | 0.01707 | 0.065 | -3.36 | -1.2005 | none       |
| SARDH    | 0.317  | 0.227   | 2.8752 | 0.01709 | 0.065 | -3.36 | -0.9272 | none       |
| IKZF3    | 0.798  | 0.8238  | 2.8746 | 0.01711 | 0.065 | -3.37 | -0.8267 | none       |
| LUC7L    | 0.357  | 0.3409  | 2.8737 | 0.01714 | 0.066 | -3.37 | -1.3586 | none       |
| FANCL    | -0.267 | -0.21   | -2.873 | 0.01715 | 0.066 | -3.37 | 2.31114 | AA-related |
| UPF3A    | 0.526  | 0.4749  | 2.8732 | 0.01715 | 0.066 | -3.37 | -0.7865 | none       |
| KCNMB3   | 0.21   | 0.1536  | 2.8722 | 0.01718 | 0.066 | -3.37 | -1.3407 | none       |
| MORC3    | 0.568  | 0.5255  | 2.8715 | 0.0172  | 0.066 | -3.37 | -1.0108 | none       |
| IL17RA   | 0.48   | 0.447   | 2.8713 | 0.0172  | 0.066 | -3.37 | 0.04421 | none       |
| TMEM159  | 0.441  | 0.2525  | 2.8711 | 0.01721 | 0.066 | -3.37 | -1.1149 | none       |
| APOC1    | 0.855  | 0.6653  | 2.871  | 0.01721 | 0.066 | -3.37 | -0.439  | none       |
| PSMG2    | -0.526 | -0.5069 | -2.871 | 0.01721 | 0.066 | -3.37 | 2.14741 | AA-related |
| TBC1D15  | 0.339  | 0.2311  | 2.8708 | 0.01722 | 0.066 | -3.37 | -0.5073 | none       |
| BRCA2    | 0.665  | 0.6967  | 2.8707 | 0.01722 | 0.066 | -3.37 | -0.9011 | none       |
| COLGALT1 | 0.425  | 0.39    | 2.8701 | 0.01724 | 0.066 | -3.37 | -1.3612 | none       |
| RNF145   | 0.239  | 0.2333  | 2.8699 | 0.01724 | 0.066 | -3.37 | 0.4475  | none       |
| TLL1     | 0.232  | 0.2326  | 2.8693 | 0.01726 | 0.066 | -3.37 | 0.89998 | none       |
| PAQR8    | 0.357  | 0.2472  | 2.8689 | 0.01727 | 0.066 | -3.37 | -0.5977 | none       |
| ZNF623   | 0.477  | 0.4219  | 2.8687 | 0.01728 | 0.066 | -3.38 | -1.116  | none       |
| KDM4B    | 0.676  | 0.6738  | 2.8683 | 0.01729 | 0.066 | -3.38 | -0.8004 | none       |
| ZBED2    | -0.298 | -0.1929 | -2.868 | 0.01729 | 0.066 | -3.38 | 2.09228 | AA-related |
| TSHZ2    | 0.57   | 0.5472  | 2.8679 | 0.0173  | 0.066 | -3.38 | -1.2357 | none       |
| CBX5     | 0.347  | 0.2653  | 2.8675 | 0.01732 | 0.066 | -3.38 | -1.2667 | none       |
| ARHGEF4  | 0.558  | 0.4363  | 2.8672 | 0.01732 | 0.066 | -3.38 | -1.0415 | none       |
| CNOT6L   | 0.251  | 0.181   | 2.8671 | 0.01733 | 0.066 | -3.38 | -0.6    | none       |

|          |        |         |        |         |       |       |         |            |
|----------|--------|---------|--------|---------|-------|-------|---------|------------|
| PARP8    | 0.501  | 0.3883  | 2.8669 | 0.01733 | 0.066 | -3.38 | -0.8148 | none       |
| ZNF18    | 0.676  | 0.5017  | 2.8664 | 0.01735 | 0.066 | -3.38 | -1.489  | none       |
| SRGN     | -0.609 | -0.5885 | -2.866 | 0.01735 | 0.066 | -3.38 | 1.62087 | none       |
| RFWD3    | 0.539  | 0.5008  | 2.8657 | 0.01737 | 0.066 | -3.38 | -1.1183 | none       |
| SGCB     | 0.48   | 0.3423  | 2.8656 | 0.01737 | 0.066 | -3.38 | -0.0876 | none       |
| TGIF2    | 0.364  | 0.2849  | 2.8656 | 0.01737 | 0.066 | -3.38 | -0.7588 | none       |
| SUMF1    | 0.374  | 0.2479  | 2.8648 | 0.0174  | 0.066 | -3.38 | -0.9489 | none       |
| EXOC3L2  | 0.431  | 0.3209  | 2.8644 | 0.01741 | 0.066 | -3.38 | -1.028  | none       |
| PSPC1    | 0.431  | 0.4437  | 2.8636 | 0.01743 | 0.066 | -3.38 | -0.8192 | none       |
| CYP27B1  | 0.806  | 0.579   | 2.863  | 0.01745 | 0.066 | -3.38 | -1.0215 | none       |
| FRMD5    | 0.466  | 0.4545  | 2.8627 | 0.01746 | 0.066 | -3.39 | -0.5034 | none       |
| CACNA1F  | 0.657  | 0.5142  | 2.8622 | 0.01747 | 0.066 | -3.39 | -1.101  | none       |
| FAM210B  | 0.373  | 0.2614  | 2.8619 | 0.01748 | 0.066 | -3.39 | -0.0492 | none       |
| ATP1B4   | 0.413  | 0.3029  | 2.8618 | 0.01748 | 0.066 | -3.39 | -1.4093 | none       |
| THUMPD3  | 0.409  | 0.3574  | 2.8613 | 0.0175  | 0.066 | -3.39 | -0.5417 | none       |
| CUL9     | 0.395  | 0.3727  | 2.8591 | 0.01756 | 0.067 | -3.39 | -1.0552 | none       |
| EEF1A2   | 0.511  | 0.3453  | 2.8577 | 0.01761 | 0.067 | -3.39 | -1.1573 | none       |
| DHRS1    | 0.384  | 0.2505  | 2.8566 | 0.01763 | 0.067 | -3.4  | -0.6006 | none       |
| ZC3H8    | 0.261  | 0.196   | 2.8564 | 0.01764 | 0.067 | -3.4  | -0.7114 | none       |
| NXNL2    | 0.383  | 0.289   | 2.856  | 0.01765 | 0.067 | -3.4  | -1.2892 | none       |
| FKBP11   | 0.315  | 0.1827  | 2.856  | 0.01765 | 0.067 | -3.4  | -0.6295 | none       |
| GLRA3    | 0.236  | 0.1684  | 2.8549 | 0.01769 | 0.067 | -3.4  | -1.3492 | none       |
| TXN      | -0.556 | -0.5566 | -2.855 | 0.0177  | 0.067 | -3.4  | 2.16813 | AA-related |
| PRAF2    | -0.657 | -0.523  | -2.854 | 0.01773 | 0.067 | -3.4  | 1.98804 | none       |
| ZNF773   | 0.513  | 0.3761  | 2.8532 | 0.01774 | 0.067 | -3.4  | -1.1523 | none       |
| KIAA1257 | 0.582  | 0.4773  | 2.8519 | 0.01778 | 0.067 | -3.4  | -1.0706 | none       |
| L1CAM    | -0.327 | -0.2507 | -2.852 | 0.01778 | 0.067 | -3.4  | 0.29134 | none       |
| GPR155   | 0.482  | 0.3299  | 2.8511 | 0.0178  | 0.067 | -3.4  | -0.6948 | none       |
| C1QTNF6  | 0.401  | 0.2985  | 2.8509 | 0.01781 | 0.067 | -3.4  | -0.9056 | none       |
| TMEM91   | 0.377  | 0.2067  | 2.8509 | 0.01781 | 0.067 | -3.4  | -0.8661 | none       |
| POLD4    | 0.361  | 0.2631  | 2.8507 | 0.01781 | 0.067 | -3.4  | -1.0587 | none       |
| OR4D1    | 0.315  | 0.2297  | 2.8498 | 0.01784 | 0.067 | -3.41 | -1.285  | none       |
| PDCD7    | 0.424  | 0.346   | 2.8497 | 0.01784 | 0.067 | -3.41 | -1.5027 | none       |
| MTIF2    | 0.555  | 0.4661  | 2.849  | 0.01786 | 0.067 | -3.41 | -0.9053 | none       |
| CLEC16A  | 0.509  | 0.5337  | 2.849  | 0.01786 | 0.067 | -3.41 | -0.3827 | none       |
| SULT1C2  | 0.383  | 0.2596  | 2.8487 | 0.01787 | 0.068 | -3.41 | -1.4049 | none       |
| RPS24    | -0.378 | -0.3808 | -2.849 | 0.01788 | 0.068 | -3.41 | 2.12533 | AA-related |
| NHP2     | -0.327 | -0.2984 | -2.848 | 0.01789 | 0.068 | -3.41 | 1.72965 | none       |
| OTUD1    | -0.278 | -0.193  | -2.848 | 0.01789 | 0.068 | -3.41 | 1.93371 | none       |
| SHOC2    | 0.351  | 0.1706  | 2.8478 | 0.0179  | 0.068 | -3.41 | -0.3366 | none       |

|          |        |         |        |         |       |       |         |            |
|----------|--------|---------|--------|---------|-------|-------|---------|------------|
| SH2D1A   | -0.592 | -0.5488 | -2.848 | 0.0179  | 0.068 | -3.41 | 0.72843 | none       |
| ICOSLG   | 0.448  | 0.402   | 2.8471 | 0.01792 | 0.068 | -3.41 | -1.4249 | none       |
| OR8J3    | 0.264  | 0.1816  | 2.8463 | 0.01795 | 0.068 | -3.41 | -1.4047 | none       |
| TMEM80   | 0.35   | 0.2885  | 2.8451 | 0.01798 | 0.068 | -3.41 | -0.3805 | none       |
| KPNA4    | 0.489  | 0.4395  | 2.8447 | 0.01799 | 0.068 | -3.41 | -0.5604 | none       |
| E2F2     | 0.353  | 0.3062  | 2.8441 | 0.01801 | 0.068 | -3.42 | -1.4854 | none       |
| MUSTN1   | -0.554 | -0.4057 | -2.844 | 0.01802 | 0.068 | -3.42 | 1.55122 | none       |
| GRIA1    | -0.533 | -0.4175 | -2.844 | 0.01803 | 0.068 | -3.42 | -0.0875 | none       |
| ZNF236   | 0.95   | 0.8503  | 2.8434 | 0.01803 | 0.068 | -3.42 | -0.9721 | none       |
| PLEK2    | -0.663 | -0.4936 | -2.843 | 0.01803 | 0.068 | -3.42 | 1.98708 | none       |
| ZNF524   | -0.296 | -0.3327 | -2.843 | 0.01804 | 0.068 | -3.42 | 1.35051 | none       |
| FRA10AC1 | 0.566  | 0.5763  | 2.843  | 0.01805 | 0.068 | -3.42 | -0.6098 | none       |
| C11ORF52 | 0.464  | 0.317   | 2.8428 | 0.01805 | 0.068 | -3.42 | -1.0902 | none       |
| LILRA6   | 0.216  | 0.1589  | 2.8421 | 0.01807 | 0.068 | -3.42 | -1.4884 | none       |
| DHX30    | 0.412  | 0.3956  | 2.8414 | 0.01809 | 0.068 | -3.42 | -0.26   | none       |
| RPSA     | -0.53  | -0.5123 | -2.841 | 0.01809 | 0.068 | -3.42 | 1.75425 | none       |
| HACE1    | 0.411  | 0.2688  | 2.841  | 0.01811 | 0.068 | -3.42 | -0.9975 | none       |
| ZNF823   | 0.436  | 0.4305  | 2.8404 | 0.01812 | 0.068 | -3.42 | 0.30872 | none       |
| PSG4     | -0.21  | -0.1346 | -2.84  | 0.01813 | 0.068 | -3.42 | -0.2092 | none       |
| TRIB3    | -0.275 | -0.2025 | -2.839 | 0.01816 | 0.068 | -3.42 | 1.82888 | none       |
| COA5     | 0.302  | 0.1617  | 2.8385 | 0.01818 | 0.068 | -3.43 | 0.33515 | none       |
| NRF1     | 0.308  | 0.2634  | 2.8384 | 0.01818 | 0.068 | -3.43 | -0.2494 | none       |
| CNST     | 0.537  | 0.5087  | 2.8373 | 0.01822 | 0.068 | -3.43 | 0.15633 | none       |
| CDCA7    | -0.339 | -0.2962 | -2.837 | 0.01823 | 0.068 | -3.43 | 2.6076  | AA-related |
| ARL17B   | 0.764  | 0.4825  | 2.837  | 0.01823 | 0.068 | -3.43 | -1.3714 | none       |
| LEPR     | 0.257  | 0.1475  | 2.8369 | 0.01823 | 0.068 | -3.43 | 0.58279 | none       |
| POLE     | 0.745  | 0.7668  | 2.8367 | 0.01824 | 0.068 | -3.43 | -1.0846 | none       |
| HCFC2    | 0.345  | 0.2817  | 2.8367 | 0.01824 | 0.068 | -3.43 | -1.2753 | none       |
| SNURF    | 0.887  | 0.5252  | 2.8365 | 0.01825 | 0.068 | -3.43 | -0.709  | none       |
| STK11    | 0.496  | 0.4876  | 2.8351 | 0.01829 | 0.069 | -3.43 | -0.8687 | none       |
| IRAK2    | 0.35   | 0.3029  | 2.8347 | 0.0183  | 0.069 | -3.43 | -0.7403 | none       |
| LLGL1    | 0.319  | 0.2952  | 2.834  | 0.01832 | 0.069 | -3.43 | -1.1355 | none       |
| MADD     | 0.636  | 0.6319  | 2.8334 | 0.01834 | 0.069 | -3.43 | -1.2416 | none       |
| ZNF432   | 0.488  | 0.4215  | 2.8333 | 0.01834 | 0.069 | -3.43 | -0.8921 | none       |
| FAM120C  | 0.249  | 0.1926  | 2.8332 | 0.01835 | 0.069 | -3.43 | 0.20117 | none       |
| SATB2    | 0.521  | 0.3942  | 2.8324 | 0.01837 | 0.069 | -3.44 | -0.7462 | none       |
| CCDC74A  | 0.338  | 0.3035  | 2.8319 | 0.01839 | 0.069 | -3.44 | -0.9523 | none       |
| POM121C  | 0.673  | 0.7277  | 2.8316 | 0.0184  | 0.069 | -3.44 | -0.9241 | none       |
| NDUFS5   | -0.39  | -0.3993 | -2.83  | 0.01844 | 0.069 | -3.44 | 2.19897 | AA-related |
| PJA2     | 0.391  | 0.2877  | 2.83   | 0.01845 | 0.069 | -3.44 | -1.3139 | none       |

|          |        |         |        |         |       |       |         |            |
|----------|--------|---------|--------|---------|-------|-------|---------|------------|
| TMEM132  | 0.279  | 0.1918  | 2.8292 | 0.01847 | 0.069 | -3.44 | -1.3801 | none       |
| SRP14    | -0.237 | -0.2215 | -2.829 | 0.01849 | 0.069 | -3.44 | 1.57968 | none       |
| PDF      | 0.594  | 0.5457  | 2.8284 | 0.0185  | 0.069 | -3.44 | 0.38007 | none       |
| PRKRA    | 0.242  | 0.1353  | 2.8283 | 0.0185  | 0.069 | -3.44 | -0.3396 | none       |
| ZZEF1    | 0.644  | 0.6513  | 2.8283 | 0.0185  | 0.069 | -3.44 | -0.6845 | none       |
| CREB3L3  | 0.418  | 0.4413  | 2.8283 | 0.0185  | 0.069 | -3.44 | -0.3496 | none       |
| FAM13B   | 0.644  | 0.5627  | 2.8283 | 0.0185  | 0.069 | -3.44 | -0.907  | none       |
| PGD      | -0.214 | -0.158  | -2.826 | 0.01856 | 0.069 | -3.44 | 2.2267  | AA-related |
| SIK2     | 0.594  | 0.5445  | 2.8262 | 0.01857 | 0.069 | -3.45 | -0.9134 | none       |
| NBR1     | 0.562  | 0.501   | 2.8255 | 0.01859 | 0.069 | -3.45 | -1.0854 | none       |
| SFTPB    | 0.472  | 0.3486  | 2.825  | 0.0186  | 0.069 | -3.45 | -1.1291 | none       |
| QTRT2    | 0.386  | 0.291   | 2.8248 | 0.01861 | 0.069 | -3.45 | -0.2667 | none       |
| GPR137   | 0.488  | 0.3743  | 2.824  | 0.01864 | 0.069 | -3.45 | -0.0162 | none       |
| HOXB7    | 0.961  | 0.8688  | 2.8236 | 0.01865 | 0.07  | -3.45 | -0.8988 | none       |
| ZNF257   | 0.792  | 0.5603  | 2.8232 | 0.01866 | 0.07  | -3.45 | -0.8442 | none       |
| HLA-E    | 0.295  | 0.1568  | 2.8228 | 0.01867 | 0.07  | -3.45 | 0.00791 | none       |
| STAU2    | 0.48   | 0.3527  | 2.8217 | 0.01871 | 0.07  | -3.45 | -0.0722 | none       |
| EXT2     | 0.265  | 0.1681  | 2.8216 | 0.01871 | 0.07  | -3.45 | 0.40009 | none       |
| TCAF2    | 0.373  | 0.3342  | 2.8215 | 0.01871 | 0.07  | -3.45 | -0.8082 | none       |
| C10ORF11 | 0.563  | 0.4287  | 2.8213 | 0.01872 | 0.07  | -3.45 | -0.9255 | none       |
| SUB1     | -0.385 | -0.3712 | -2.821 | 0.01872 | 0.07  | -3.45 | 1.83375 | none       |
| SIRPG    | -0.232 | -0.2086 | -2.821 | 0.01873 | 0.07  | -3.45 | 1.62802 | none       |
| MBTD1    | 0.474  | 0.4022  | 2.8207 | 0.01874 | 0.07  | -3.45 | -0.8286 | none       |
| AVPR1A   | 0.24   | 0.1578  | 2.8201 | 0.01876 | 0.07  | -3.46 | -0.2033 | none       |
| TBCA     | -0.352 | -0.3557 | -2.819 | 0.0188  | 0.07  | -3.46 | 1.85352 | none       |
| DDX10    | 0.663  | 0.6421  | 2.8187 | 0.0188  | 0.07  | -3.46 | -0.298  | none       |
| GOLGA2   | 0.614  | 0.5483  | 2.8186 | 0.0188  | 0.07  | -3.46 | -0.7017 | none       |
| NDUFA4   | -0.444 | -0.4504 | -2.818 | 0.01881 | 0.07  | -3.46 | 2.24306 | AA-related |
| ZNF106   | 0.91   | 0.895   | 2.8183 | 0.01881 | 0.07  | -3.46 | -0.8424 | none       |
| SNX15    | 0.556  | 0.4162  | 2.8181 | 0.01882 | 0.07  | -3.46 | -0.5333 | none       |
| NXPE3    | 0.421  | 0.3033  | 2.8179 | 0.01883 | 0.07  | -3.46 | -0.3408 | none       |
| QRICH1   | 0.692  | 0.7022  | 2.8174 | 0.01884 | 0.07  | -3.46 | -0.6979 | none       |
| POLE3    | -0.276 | -0.256  | -2.817 | 0.01885 | 0.07  | -3.46 | 2.29567 | AA-related |
| RRM2     | -0.355 | -0.3107 | -2.817 | 0.01886 | 0.07  | -3.46 | 2.10634 | AA-related |
| ZNF678   | 0.386  | 0.2876  | 2.8164 | 0.01887 | 0.07  | -3.46 | -0.4971 | none       |
| RDH13    | 0.637  | 0.584   | 2.8164 | 0.01888 | 0.07  | -3.46 | -0.2773 | none       |
| FAM184A  | 0.668  | 0.5937  | 2.8148 | 0.01892 | 0.07  | -3.46 | -0.091  | none       |
| FAM172A  | 0.47   | 0.3431  | 2.8146 | 0.01893 | 0.07  | -3.46 | 0.58631 | none       |
| CCDC146  | 0.411  | 0.2452  | 2.8142 | 0.01894 | 0.07  | -3.47 | -0.6023 | none       |
| GPX3     | 0.809  | 0.7954  | 2.8142 | 0.01895 | 0.07  | -3.47 | -1.0203 | none       |

|          |        |         |        |         |       |       |         |            |
|----------|--------|---------|--------|---------|-------|-------|---------|------------|
| MPDU1    | 0.412  | 0.2149  | 2.8139 | 0.01896 | 0.07  | -3.47 | -0.8093 | none       |
| SHMT2    | -0.242 | -0.1787 | -2.814 | 0.01896 | 0.07  | -3.47 | 0.55244 | none       |
| TSNARE1  | 0.518  | 0.4334  | 2.813  | 0.01898 | 0.07  | -3.47 | -1.0008 | none       |
| HIST1H1D | -0.381 | -0.3525 | -2.813 | 0.01899 | 0.07  | -3.47 | 0.93128 | none       |
| MGAT4B   | 0.309  | 0.3032  | 2.8121 | 0.01901 | 0.07  | -3.47 | -0.2704 | none       |
| DCDC2    | 0.375  | 0.2707  | 2.8119 | 0.01902 | 0.07  | -3.47 | -1.3808 | none       |
| U2AF1L4  | 0.375  | 0.2299  | 2.8114 | 0.01903 | 0.07  | -3.47 | -1.1741 | none       |
| DNAJC25  | 0.32   | 0.2602  | 2.8114 | 0.01903 | 0.07  | -3.47 | -0.6939 | none       |
| SCARB2   | 0.449  | 0.3171  | 2.8104 | 0.01907 | 0.071 | -3.47 | -1.1373 | none       |
| SULF2    | 0.495  | 0.512   | 2.8096 | 0.01909 | 0.071 | -3.47 | -0.1314 | none       |
| FAM227B  | 0.568  | 0.4187  | 2.8091 | 0.01911 | 0.071 | -3.47 | 0.09682 | none       |
| PRPF39   | 0.507  | 0.4324  | 2.809  | 0.01911 | 0.071 | -3.47 | -0.1398 | none       |
| C4ORF36  | 0.406  | 0.3694  | 2.8084 | 0.01913 | 0.071 | -3.47 | -0.5665 | none       |
| ACSM3    | 0.545  | 0.4891  | 2.8083 | 0.01913 | 0.071 | -3.47 | -0.6307 | none       |
| RPL22L1  | -0.587 | -0.5732 | -2.807 | 0.01916 | 0.071 | -3.48 | 2.28251 | AA-related |
| WDR72    | 0.822  | 0.6861  | 2.8073 | 0.01917 | 0.071 | -3.48 | -0.6163 | none       |
| RPL22    | -0.408 | -0.4355 | -2.807 | 0.01918 | 0.071 | -3.48 | 1.97159 | none       |
| CYB5D2   | 0.469  | 0.3184  | 2.8064 | 0.01919 | 0.071 | -3.48 | -1.0377 | none       |
| CLDN12   | 0.542  | 0.4253  | 2.8063 | 0.0192  | 0.071 | -3.48 | -1.3191 | none       |
| PCCB     | 0.226  | 0.1535  | 2.8063 | 0.0192  | 0.071 | -3.48 | -0.5891 | none       |
| ADAT2    | 0.365  | 0.2757  | 2.8057 | 0.01922 | 0.071 | -3.48 | -1.0211 | none       |
| LMO7     | 0.422  | 0.3686  | 2.8056 | 0.01922 | 0.071 | -3.48 | -0.1592 | none       |
| TP53AIP1 | 0.492  | 0.3446  | 2.8043 | 0.01926 | 0.071 | -3.48 | -1.2701 | none       |
| B4GALNT2 | 0.231  | 0.2031  | 2.8043 | 0.01926 | 0.071 | -3.48 | -0.9176 | none       |
| NINJ2    | -0.381 | -0.4006 | -2.804 | 0.01928 | 0.071 | -3.48 | 1.32467 | none       |
| CCL22    | 0.662  | 0.5264  | 2.8037 | 0.01928 | 0.071 | -3.48 | -1.2979 | none       |
| MRPL30   | 0.339  | 0.2235  | 2.8035 | 0.01929 | 0.071 | -3.48 | -1.0887 | none       |
| INTS6L   | 0.426  | 0.3546  | 2.8029 | 0.01931 | 0.071 | -3.48 | 0.29687 | none       |
| KMT2E    | 0.653  | 0.6167  | 2.8028 | 0.01931 | 0.071 | -3.48 | -0.809  | none       |
| SYT13    | 0.273  | 0.181   | 2.8026 | 0.01932 | 0.071 | -3.48 | -1.3056 | none       |
| RAB15    | 0.455  | 0.3998  | 2.8023 | 0.01933 | 0.071 | -3.48 | -1.2535 | none       |
| RAI1     | 0.386  | 0.4055  | 2.802  | 0.01934 | 0.071 | -3.49 | -0.5013 | none       |
| PRLHR    | 0.278  | 0.2002  | 2.8018 | 0.01935 | 0.071 | -3.49 | -1.1788 | none       |
| GNS      | 0.328  | 0.1969  | 2.8011 | 0.01937 | 0.071 | -3.49 | -0.9698 | none       |
| VEZT     | 0.549  | 0.4715  | 2.8006 | 0.01938 | 0.071 | -3.49 | -0.8834 | none       |
| CHCHD2   | -0.456 | -0.422  | -2.8   | 0.0194  | 0.071 | -3.49 | 2.12148 | AA-related |
| FAM168A  | 0.766  | 0.7129  | 2.8    | 0.0194  | 0.071 | -3.49 | -1.1366 | none       |
| DDX42    | 0.916  | 0.8983  | 2.7999 | 0.01941 | 0.071 | -3.49 | -1.0387 | none       |
| MED10    | -0.208 | -0.1727 | -2.799 | 0.01944 | 0.071 | -3.49 | 1.74367 | none       |
| AMT      | 0.338  | 0.3154  | 2.798  | 0.01947 | 0.072 | -3.49 | -0.6922 | none       |

|          |        |         |        |         |       |       |         |      |
|----------|--------|---------|--------|---------|-------|-------|---------|------|
| XPO6     | 0.416  | 0.3953  | 2.7978 | 0.01948 | 0.072 | -3.49 | -1.0328 | none |
| 12-Sep   | 0.747  | 0.5805  | 2.7977 | 0.01948 | 0.072 | -3.49 | -0.8982 | none |
| C14ORF28 | 0.387  | 0.2035  | 2.7971 | 0.0195  | 0.072 | -3.49 | -0.588  | none |
| ZNF385D  | 0.314  | 0.2502  | 2.7969 | 0.01951 | 0.072 | -3.49 | -0.8675 | none |
| DNASE2   | 0.338  | 0.2868  | 2.7961 | 0.01953 | 0.072 | -3.49 | -0.1565 | none |
| LGALS7B  | -0.194 | -0.1292 | -2.794 | 0.01961 | 0.072 | -3.5  | -0.2163 | none |
| USP7     | 0.884  | 0.8185  | 2.7936 | 0.01962 | 0.072 | -3.5  | -0.7851 | none |
| PYHIN1   | 0.573  | 0.4311  | 2.7934 | 0.01962 | 0.072 | -3.5  | -0.9861 | none |
| PRDM5    | 0.898  | 0.7208  | 2.7929 | 0.01964 | 0.072 | -3.5  | -0.9138 | none |
| STON1    | 0.24   | 0.2019  | 2.7924 | 0.01966 | 0.072 | -3.5  | -1.2368 | none |
| ADM      | -0.56  | -0.3998 | -2.792 | 0.01968 | 0.072 | -3.5  | 1.76375 | none |
| TDRKH    | 0.58   | 0.4371  | 2.7914 | 0.01969 | 0.072 | -3.5  | -0.8738 | none |
| NQO1     | -0.377 | -0.4287 | -2.791 | 0.01969 | 0.072 | -3.5  | 1.98918 | none |
| IL34     | 0.474  | 0.3374  | 2.7911 | 0.0197  | 0.072 | -3.5  | -0.2395 | none |
| EIF2AK4  | 0.602  | 0.573   | 2.7911 | 0.0197  | 0.072 | -3.5  | -1.279  | none |
| C2ORF80  | 0.618  | 0.407   | 2.7909 | 0.0197  | 0.072 | -3.5  | -1.3268 | none |
| FAHD1    | 0.327  | 0.2565  | 2.7904 | 0.01972 | 0.072 | -3.5  | -1.0741 | none |
| PPP1CA   | -0.339 | -0.2978 | -2.79  | 0.01975 | 0.072 | -3.51 | 1.34758 | none |
| FAM153B  | 0.827  | 0.6591  | 2.7879 | 0.0198  | 0.072 | -3.51 | -0.9507 | none |
| GJB3     | -0.283 | -0.1767 | -2.787 | 0.01983 | 0.073 | -3.51 | 1.13124 | none |
| HELLS    | 0.501  | 0.5012  | 2.7871 | 0.01983 | 0.073 | -3.51 | -1.2712 | none |
| MAST3    | 0.532  | 0.4821  | 2.7871 | 0.01983 | 0.073 | -3.51 | -1.1303 | none |
| RPGR     | 0.397  | 0.2877  | 2.787  | 0.01983 | 0.073 | -3.51 | -1.094  | none |
| MAP3K19  | -0.31  | -0.219  | -2.787 | 0.01984 | 0.073 | -3.51 | 0.17736 | none |
| ZSCAN12  | 0.572  | 0.4808  | 2.7867 | 0.01985 | 0.073 | -3.51 | -1.2388 | none |
| TRIM45   | 0.317  | 0.2349  | 2.786  | 0.01987 | 0.073 | -3.51 | -1.1369 | none |
| EPHA10   | 0.506  | 0.3208  | 2.7857 | 0.01988 | 0.073 | -3.51 | -1.2265 | none |
| NDUFA5   | 0.313  | 0.1519  | 2.7856 | 0.01988 | 0.073 | -3.51 | -0.9497 | none |
| OSMR     | 0.24   | 0.1348  | 2.784  | 0.01994 | 0.073 | -3.51 | -0.7811 | none |
| BMPR2    | 0.547  | 0.5544  | 2.7837 | 0.01994 | 0.073 | -3.52 | -0.0402 | none |
| UFSP2    | -0.335 | -0.3092 | -2.783 | 0.01996 | 0.073 | -3.52 | 1.93346 | none |
| MAST4    | 0.556  | 0.5843  | 2.7827 | 0.01998 | 0.073 | -3.52 | -0.6045 | none |
| CREM     | -0.363 | -0.3605 | -2.781 | 0.02004 | 0.073 | -3.52 | 1.17424 | none |
| EPC1     | 0.252  | 0.2351  | 2.7807 | 0.02005 | 0.073 | -3.52 | 0.28717 | none |
| GPR89A   | 0.326  | 0.2105  | 2.7807 | 0.02005 | 0.073 | -3.52 | -0.3955 | none |
| IL18RAP  | -0.285 | -0.2572 | -2.78  | 0.02007 | 0.073 | -3.52 | 1.28849 | none |
| DNA2     | 0.585  | 0.4954  | 2.7796 | 0.02009 | 0.073 | -3.52 | -1.3027 | none |
| UTS2B    | 0.347  | 0.2645  | 2.7795 | 0.02009 | 0.073 | -3.52 | -0.6898 | none |
| RANBP9   | 0.617  | 0.5464  | 2.779  | 0.02011 | 0.073 | -3.52 | 0.19421 | none |
| GLMN     | 0.356  | 0.2626  | 2.7781 | 0.02014 | 0.073 | -3.52 | -0.2496 | none |

|          |        |         |        |         |       |       |         |            |
|----------|--------|---------|--------|---------|-------|-------|---------|------------|
| ARHGDIB  | -0.258 | -0.2114 | -2.776 | 0.02022 | 0.074 | -3.53 | 1.9976  | none       |
| NDUFAF4  | -0.454 | -0.4045 | -2.774 | 0.02026 | 0.074 | -3.53 | 2.55481 | AA-related |
| FAM199X  | 0.252  | 0.1457  | 2.7735 | 0.02029 | 0.074 | -3.53 | -0.428  | none       |
| NKIRAS1  | 0.419  | 0.276   | 2.773  | 0.02031 | 0.074 | -3.53 | -0.7817 | none       |
| HSPA8    | -0.306 | -0.2623 | -2.773 | 0.02031 | 0.074 | -3.53 | 2.18412 | AA-related |
| APOL2    | 0.654  | 0.6107  | 2.7725 | 0.02033 | 0.074 | -3.53 | -1.3865 | none       |
| ID3      | -0.437 | -0.3741 | -2.772 | 0.02035 | 0.074 | -3.53 | 2.22865 | AA-related |
| MAP7D1   | 0.68   | 0.6734  | 2.7716 | 0.02036 | 0.074 | -3.54 | -0.9755 | none       |
| UBAP2L   | 0.62   | 0.6324  | 2.7716 | 0.02036 | 0.074 | -3.54 | -0.7058 | none       |
| ACSL3    | 0.408  | 0.3519  | 2.7715 | 0.02036 | 0.074 | -3.54 | -0.2707 | none       |
| ZNF334   | 0.274  | 0.2062  | 2.7707 | 0.02039 | 0.074 | -3.54 | -1.247  | none       |
| LSM5     | -0.544 | -0.5531 | -2.771 | 0.02039 | 0.074 | -3.54 | 2.13291 | AA-related |
| PDE1B    | 0.416  | 0.3558  | 2.7707 | 0.02039 | 0.074 | -3.54 | -1.118  | none       |
| GCNT4    | 0.252  | 0.1124  | 2.7706 | 0.02039 | 0.074 | -3.54 | -0.6236 | none       |
| UBA6     | 0.56   | 0.475   | 2.7695 | 0.02043 | 0.074 | -3.54 | -1.2776 | none       |
| CABP1    | 0.563  | 0.4318  | 2.7684 | 0.02047 | 0.074 | -3.54 | -0.9576 | none       |
| KPNA2    | -0.3   | -0.2308 | -2.768 | 0.02049 | 0.074 | -3.54 | 1.37468 | none       |
| TTC39B   | 0.326  | 0.1834  | 2.7679 | 0.02049 | 0.074 | -3.54 | -1.0255 | none       |
| C8ORF37  | 0.401  | 0.3445  | 2.7672 | 0.02051 | 0.074 | -3.54 | -0.3346 | none       |
| SLC39A13 | 0.382  | 0.2869  | 2.7669 | 0.02052 | 0.074 | -3.54 | -0.3105 | none       |
| MFF      | -0.355 | -0.3103 | -2.766 | 0.02054 | 0.074 | -3.54 | 2.32114 | AA-related |
| ZNF880   | 0.431  | 0.3318  | 2.7659 | 0.02055 | 0.075 | -3.54 | -0.5645 | none       |
| NDC80    | 0.644  | 0.5853  | 2.7657 | 0.02056 | 0.075 | -3.55 | -1.2772 | none       |
| PIH1D2   | 0.838  | 0.6432  | 2.7652 | 0.02058 | 0.075 | -3.55 | -1.3055 | none       |
| MRPS6    | -0.456 | -0.465  | -2.764 | 0.02061 | 0.075 | -3.55 | 1.6634  | none       |
| CSNK1G3  | 0.41   | 0.4173  | 2.7635 | 0.02064 | 0.075 | -3.55 | 0.7655  | none       |
| SEMA5B   | 0.26   | 0.1726  | 2.7635 | 0.02064 | 0.075 | -3.55 | -1.206  | none       |
| CD300A   | 0.38   | 0.2813  | 2.7632 | 0.02065 | 0.075 | -3.55 | -1.0338 | none       |
| DHX37    | 0.707  | 0.6758  | 2.7625 | 0.02067 | 0.075 | -3.55 | -1.1518 | none       |
| OR6J1    | 0.292  | 0.2213  | 2.7619 | 0.02069 | 0.075 | -3.55 | -0.7799 | none       |
| NUP37    | -0.351 | -0.3577 | -2.762 | 0.0207  | 0.075 | -3.55 | 1.88946 | none       |
| SH3YL1   | 0.353  | 0.1713  | 2.7618 | 0.0207  | 0.075 | -3.55 | -0.8545 | none       |
| PAM      | 0.342  | 0.3451  | 2.7612 | 0.02072 | 0.075 | -3.55 | 0.22862 | none       |
| C2ORF91  | 0.331  | 0.2905  | 2.7611 | 0.02072 | 0.075 | -3.55 | -0.3689 | none       |
| SEN2     | 0.299  | 0.152   | 2.761  | 0.02073 | 0.075 | -3.55 | -1.2188 | none       |
| CLSTN2   | 0.214  | 0.1458  | 2.7608 | 0.02073 | 0.075 | -3.55 | -1.3951 | none       |
| KDM4C    | 0.635  | 0.6131  | 2.7602 | 0.02075 | 0.075 | -3.55 | -0.3997 | none       |
| LRRC37A2 | 0.523  | 0.506   | 2.7598 | 0.02077 | 0.075 | -3.55 | -0.7299 | none       |
| MRPL51   | -0.411 | -0.3909 | -2.76  | 0.02078 | 0.075 | -3.56 | 1.39708 | none       |
| NPM3     | -0.517 | -0.4724 | -2.759 | 0.02078 | 0.075 | -3.56 | 2.29971 | AA-related |



|           |        |         |        |         |       |       |         |            |
|-----------|--------|---------|--------|---------|-------|-------|---------|------------|
| CCT4      | -0.29  | -0.2527 | -2.759 | 0.02079 | 0.075 | -3.56 | 1.94383 | none       |
| ACOXL     | 0.441  | 0.3551  | 2.7582 | 0.02082 | 0.075 | -3.56 | -1.1041 | none       |
| PALB2     | 0.659  | 0.6406  | 2.7577 | 0.02084 | 0.075 | -3.56 | -0.1244 | none       |
| STIM1     | 0.308  | 0.2643  | 2.7573 | 0.02086 | 0.075 | -3.56 | 0.01025 | none       |
| AL358113. | 0.677  | 0.4481  | 2.757  | 0.02086 | 0.075 | -3.56 | -0.4883 | none       |
| TGM1      | 0.342  | 0.3238  | 2.7569 | 0.02087 | 0.075 | -3.56 | -1.0211 | none       |
| FHIT      | 0.546  | 0.3148  | 2.7568 | 0.02087 | 0.075 | -3.56 | -0.5764 | none       |
| GPR12     | 0.291  | 0.225   | 2.7559 | 0.0209  | 0.075 | -3.56 | -0.5165 | none       |
| C7ORF61   | 0.326  | 0.3571  | 2.7553 | 0.02092 | 0.075 | -3.56 | -0.1613 | none       |
| ERO1B     | -0.337 | -0.3146 | -2.755 | 0.02094 | 0.075 | -3.56 | 1.61697 | none       |
| INPP5E    | 0.286  | 0.2663  | 2.7547 | 0.02095 | 0.075 | -3.56 | -0.9184 | none       |
| CTTNBP2N  | 0.556  | 0.5271  | 2.7546 | 0.02095 | 0.075 | -3.56 | -1.0395 | none       |
| MYL12B    | -0.291 | -0.318  | -2.754 | 0.02096 | 0.075 | -3.56 | 1.85049 | none       |
| PRKAG1    | 0.348  | 0.1927  | 2.7539 | 0.02098 | 0.076 | -3.56 | -0.7718 | none       |
| ZNF260    | 0.525  | 0.4827  | 2.7537 | 0.02098 | 0.076 | -3.56 | -0.6987 | none       |
| LRIG2     | 0.611  | 0.5685  | 2.7534 | 0.02099 | 0.076 | -3.57 | -1.4381 | none       |
| PPP4C     | 0.303  | 0.2152  | 2.7531 | 0.021   | 0.076 | -3.57 | -0.126  | none       |
| RPS6KA6   | 0.316  | 0.232   | 2.7528 | 0.02102 | 0.076 | -3.57 | -1.4293 | none       |
| TMEM233   | 0.36   | 0.2942  | 2.7528 | 0.02102 | 0.076 | -3.57 | 0.0668  | none       |
| NUTM2D    | 0.328  | 0.2943  | 2.7527 | 0.02102 | 0.076 | -3.57 | -1.4345 | none       |
| DCLRE1C   | 0.783  | 0.7582  | 2.7527 | 0.02102 | 0.076 | -3.57 | -1.1215 | none       |
| DHRS12    | -0.294 | -0.2413 | -2.752 | 0.02103 | 0.076 | -3.57 | 0.50268 | none       |
| ATG2B     | 0.705  | 0.6344  | 2.7522 | 0.02104 | 0.076 | -3.57 | -0.6321 | none       |
| PRICKLE3  | 0.306  | 0.2499  | 2.752  | 0.02104 | 0.076 | -3.57 | 0.07352 | none       |
| KDM6A     | 0.47   | 0.4316  | 2.7515 | 0.02106 | 0.076 | -3.57 | 0.14633 | none       |
| FHDC1     | 0.257  | 0.1991  | 2.7509 | 0.02108 | 0.076 | -3.57 | -1.5574 | OA-related |
| DERL2     | -0.422 | -0.3824 | -2.75  | 0.02112 | 0.076 | -3.57 | 1.23252 | none       |
| ZNF551    | 0.339  | 0.3076  | 2.7491 | 0.02114 | 0.076 | -3.57 | -0.861  | none       |
| IFRD1     | 0.397  | 0.3714  | 2.7476 | 0.0212  | 0.076 | -3.57 | -0.4323 | none       |
| CNNM3     | 0.373  | 0.3096  | 2.7476 | 0.0212  | 0.076 | -3.57 | -0.4822 | none       |
| SHANK1    | 0.302  | 0.2585  | 2.7476 | 0.0212  | 0.076 | -3.57 | 0.11376 | none       |
| RPL14     | -0.36  | -0.3459 | -2.747 | 0.02124 | 0.076 | -3.58 | 1.82513 | none       |
| CDKN2AIP  | 0.357  | 0.2038  | 2.7463 | 0.02125 | 0.076 | -3.58 | -0.8294 | none       |
| ADAL      | 0.439  | 0.3855  | 2.746  | 0.02126 | 0.076 | -3.58 | -1.2984 | none       |
| ACSM2A    | 0.384  | 0.3454  | 2.746  | 0.02126 | 0.076 | -3.58 | -0.5765 | none       |
| CD79B     | -0.237 | -0.1921 | -2.745 | 0.02128 | 0.076 | -3.58 | 1.41173 | none       |
| GPC2      | 0.487  | 0.4164  | 2.7454 | 0.02128 | 0.076 | -3.58 | -1.2233 | none       |
| SAXO2     | 0.818  | 0.6456  | 2.7445 | 0.02131 | 0.076 | -3.58 | -0.8881 | none       |
| HBS1L     | 0.412  | 0.3656  | 2.7445 | 0.02131 | 0.076 | -3.58 | -0.9257 | none       |
| MYL6      | -0.371 | -0.3247 | -2.744 | 0.02134 | 0.076 | -3.58 | 0.50183 | none       |

|         |        |         |        |         |       |       |         |      |
|---------|--------|---------|--------|---------|-------|-------|---------|------|
| MOBP    | 0.41   | 0.304   | 2.7435 | 0.02135 | 0.076 | -3.58 | -1.4079 | none |
| PRDM2   | 0.551  | 0.4845  | 2.7433 | 0.02135 | 0.076 | -3.58 | -1.2404 | none |
| CCAR1   | 0.91   | 0.8819  | 2.7409 | 0.02144 | 0.077 | -3.59 | -0.5222 | none |
| NUP210L | 0.195  | 0.1517  | 2.7404 | 0.02146 | 0.077 | -3.59 | -1.1486 | none |
| VN1R1   | 0.229  | 0.1315  | 2.74   | 0.02148 | 0.077 | -3.59 | -1.254  | none |
| SMAD9   | 0.297  | 0.235   | 2.7399 | 0.02148 | 0.077 | -3.59 | -0.9721 | none |
| FLT1    | 0.734  | 0.6924  | 2.7381 | 0.02154 | 0.077 | -3.59 | -0.2724 | none |
| SULT1A3 | 0.495  | 0.4698  | 2.7376 | 0.02156 | 0.077 | -3.59 | -0.2496 | none |
| RBM6    | 0.745  | 0.7001  | 2.7373 | 0.02157 | 0.077 | -3.59 | -1.3205 | none |
| MUC17   | 0.568  | 0.3425  | 2.737  | 0.02158 | 0.077 | -3.59 | -0.0097 | none |
| TOMM6   | -0.404 | -0.3932 | -2.737 | 0.02158 | 0.077 | -3.59 | 2.00937 | none |
| GDF15   | 0.668  | 0.4983  | 2.737  | 0.02158 | 0.077 | -3.59 | -1.4328 | none |
| PIK3CD  | 0.568  | 0.5756  | 2.7363 | 0.02161 | 0.077 | -3.59 | -0.2413 | none |
| PIGO    | 0.416  | 0.3233  | 2.7362 | 0.02161 | 0.077 | -3.59 | -0.6842 | none |
| VAC14   | 0.549  | 0.5483  | 2.7361 | 0.02161 | 0.077 | -3.59 | -0.622  | none |
| SNX21   | 0.626  | 0.4686  | 2.7353 | 0.02164 | 0.077 | -3.59 | -1.3373 | none |
| MFGE8   | 0.377  | 0.2675  | 2.7351 | 0.02165 | 0.077 | -3.6  | -1.0303 | none |
| ALDOA   | -0.318 | -0.2442 | -2.735 | 0.02165 | 0.077 | -3.6  | 1.40942 | none |
| SLITRK5 | 0.248  | 0.1731  | 2.7349 | 0.02166 | 0.077 | -3.6  | -1.412  | none |
| ZNF211  | 0.355  | 0.3107  | 2.734  | 0.02169 | 0.077 | -3.6  | -0.1138 | none |
| NEIL3   | 0.237  | 0.1382  | 2.7339 | 0.0217  | 0.077 | -3.6  | 0.22623 | none |
| LARGE1  | 0.36   | 0.3332  | 2.7337 | 0.0217  | 0.077 | -3.6  | -0.8839 | none |
| MRPL21  | -0.409 | -0.3981 | -2.734 | 0.02171 | 0.077 | -3.6  | 1.9044  | none |
| ENAH    | 0.35   | 0.2673  | 2.7321 | 0.02176 | 0.078 | -3.6  | -1.1786 | none |
| TBX3    | -0.205 | -0.1477 | -2.732 | 0.02178 | 0.078 | -3.6  | 1.19534 | none |
| ATPAF1  | 0.381  | 0.3315  | 2.7311 | 0.0218  | 0.078 | -3.6  | 0.78617 | none |
| HPD     | 0.261  | 0.2615  | 2.7307 | 0.02181 | 0.078 | -3.6  | 0.96786 | none |
| UBR3    | 0.583  | 0.5781  | 2.7306 | 0.02182 | 0.078 | -3.6  | -0.0875 | none |
| SPG11   | 0.575  | 0.4753  | 2.73   | 0.02184 | 0.078 | -3.6  | -0.9396 | none |
| FDXACB1 | 0.26   | 0.1058  | 2.7298 | 0.02185 | 0.078 | -3.6  | -0.8165 | none |
| JAML    | -0.259 | -0.244  | -2.729 | 0.02186 | 0.078 | -3.6  | 0.52625 | none |
| POLR1A  | 0.735  | 0.8074  | 2.7287 | 0.02189 | 0.078 | -3.61 | -0.2639 | none |
| RAB12   | 0.725  | 0.5761  | 2.7286 | 0.02189 | 0.078 | -3.61 | -1.3973 | none |
| XPNPEP3 | 0.4    | 0.3112  | 2.7282 | 0.02191 | 0.078 | -3.61 | -1.4104 | none |
| CEP68   | 0.478  | 0.3903  | 2.7276 | 0.02193 | 0.078 | -3.61 | -0.6111 | none |
| KLC2    | 0.535  | 0.5208  | 2.7273 | 0.02194 | 0.078 | -3.61 | 0.2489  | none |
| ZNF548  | 0.55   | 0.3942  | 2.7273 | 0.02194 | 0.078 | -3.61 | -0.3164 | none |
| SOS1    | 0.763  | 0.6975  | 2.7268 | 0.02196 | 0.078 | -3.61 | -0.4675 | none |
| SLC7A11 | 0.282  | 0.2112  | 2.7265 | 0.02197 | 0.078 | -3.61 | -0.845  | none |
| EFCAB5  | 0.89   | 0.6615  | 2.7252 | 0.02202 | 0.078 | -3.61 | -0.6518 | none |

|         |        |         |        |         |       |       |         |            |
|---------|--------|---------|--------|---------|-------|-------|---------|------------|
| ERH     | -0.396 | -0.3902 | -2.725 | 0.02203 | 0.078 | -3.61 | 1.63414 | none       |
| DGAT1   | -0.491 | -0.3606 | -2.724 | 0.02206 | 0.078 | -3.61 | 1.14148 | none       |
| AKR1B15 | 0.283  | 0.2695  | 2.7238 | 0.02207 | 0.078 | -3.61 | -0.6633 | none       |
| SLC44A5 | 0.383  | 0.3122  | 2.7234 | 0.02208 | 0.078 | -3.61 | -1.2235 | none       |
| PFDN1   | -0.214 | -0.2295 | -2.723 | 0.02208 | 0.078 | -3.61 | 1.72373 | none       |
| PLA2G4E | 0.2    | 0.1528  | 2.7231 | 0.0221  | 0.078 | -3.62 | -0.9906 | none       |
| ZWINT   | -0.208 | -0.159  | -2.723 | 0.02211 | 0.078 | -3.62 | 1.69709 | none       |
| TMC7    | 0.576  | 0.4124  | 2.7216 | 0.02215 | 0.079 | -3.62 | -1.2738 | none       |
| RAC2    | -0.29  | -0.2401 | -2.721 | 0.02217 | 0.079 | -3.62 | 2.09859 | AA-related |
| LRPPRC  | 0.658  | 0.6148  | 2.7203 | 0.0222  | 0.079 | -3.62 | -0.4419 | none       |
| LILRA5  | 0.372  | 0.265   | 2.7201 | 0.02221 | 0.079 | -3.62 | -0.8625 | none       |
| PKN1    | 0.435  | 0.37    | 2.72   | 0.02221 | 0.079 | -3.62 | -1.0364 | none       |
| TBX1    | 0.526  | 0.418   | 2.7195 | 0.02223 | 0.079 | -3.62 | -0.0757 | none       |
| F2RL2   | 0.455  | 0.3153  | 2.7183 | 0.02228 | 0.079 | -3.62 | -0.8601 | none       |
| LCLAT1  | 0.332  | 0.2919  | 2.7178 | 0.02229 | 0.079 | -3.62 | -0.8108 | none       |
| SLF2    | 0.693  | 0.6516  | 2.7175 | 0.02231 | 0.079 | -3.62 | -0.745  | none       |
| BIRC6   | 0.922  | 0.8892  | 2.7165 | 0.02234 | 0.079 | -3.63 | -0.9853 | none       |
| ABCA7   | 0.388  | 0.3991  | 2.7165 | 0.02235 | 0.079 | -3.63 | -0.1362 | none       |
| TMEM249 | 0.207  | 0.1559  | 2.7164 | 0.02235 | 0.079 | -3.63 | -1.0549 | none       |
| NME9    | 0.369  | 0.3218  | 2.7159 | 0.02237 | 0.079 | -3.63 | -0.7001 | none       |
| RHPN1   | 0.347  | 0.3047  | 2.7154 | 0.02238 | 0.079 | -3.63 | -0.3431 | none       |
| BST2    | -0.396 | -0.365  | -2.715 | 0.02239 | 0.079 | -3.63 | 2.17598 | AA-related |
| IGSF1   | 0.298  | 0.2048  | 2.7145 | 0.02242 | 0.079 | -3.63 | -0.6851 | none       |
| KRT15   | 0.37   | 0.2345  | 2.7144 | 0.02242 | 0.079 | -3.63 | -0.7825 | none       |
| SEC24C  | 0.258  | 0.2649  | 2.7126 | 0.02249 | 0.079 | -3.63 | 0.01807 | none       |
| RAE1    | -0.214 | -0.199  | -2.712 | 0.0225  | 0.079 | -3.63 | 2.26098 | AA-related |
| FTL     | -0.428 | -0.4018 | -2.712 | 0.0225  | 0.079 | -3.63 | 2.14515 | AA-related |
| NAA25   | 0.4    | 0.3178  | 2.7115 | 0.02253 | 0.08  | -3.63 | -0.8311 | none       |
| PAN3    | 0.467  | 0.3932  | 2.7115 | 0.02253 | 0.08  | -3.63 | -1.2385 | none       |
| ZSCAN20 | 0.519  | 0.4232  | 2.7114 | 0.02254 | 0.08  | -3.63 | -1.3717 | none       |
| CLCN5   | 0.325  | 0.1886  | 2.7109 | 0.02256 | 0.08  | -3.64 | -1.3174 | none       |
| TTLL6   | 0.448  | 0.378   | 2.7103 | 0.02258 | 0.08  | -3.64 | -0.8885 | none       |
| RERG    | 0.572  | 0.5139  | 2.7101 | 0.02259 | 0.08  | -3.64 | -0.7309 | none       |
| SEMA6A  | 0.643  | 0.4847  | 2.7098 | 0.0226  | 0.08  | -3.64 | -0.957  | none       |
| TLK2    | 0.571  | 0.4703  | 2.7095 | 0.02261 | 0.08  | -3.64 | -0.8266 | none       |
| BAP1    | 0.555  | 0.5746  | 2.7091 | 0.02262 | 0.08  | -3.64 | -0.8897 | none       |
| CHD7    | 0.486  | 0.4598  | 2.7089 | 0.02263 | 0.08  | -3.64 | 0.66789 | none       |
| ONECUT3 | 0.298  | 0.2048  | 2.7087 | 0.02264 | 0.08  | -3.64 | -1.2614 | none       |
| DHX34   | 0.344  | 0.3583  | 2.7068 | 0.02271 | 0.08  | -3.64 | -0.1912 | none       |
| CTC1    | 0.471  | 0.4873  | 2.7067 | 0.02272 | 0.08  | -3.64 | -0.8082 | none       |

|           |        |         |        |         |       |       |         |      |
|-----------|--------|---------|--------|---------|-------|-------|---------|------|
| OAS3      | 0.588  | 0.5577  | 2.7067 | 0.02272 | 0.08  | -3.64 | -1.1325 | none |
| GZMB      | -0.396 | -0.1616 | -2.707 | 0.02272 | 0.08  | -3.64 | 1.58142 | none |
| RPE       | 0.45   | 0.2543  | 2.7063 | 0.02273 | 0.08  | -3.64 | -0.9428 | none |
| SLC39A5   | 0.484  | 0.3167  | 2.7058 | 0.02275 | 0.08  | -3.64 | -1.0564 | none |
| ZNF341    | 0.431  | 0.3559  | 2.7057 | 0.02276 | 0.08  | -3.64 | -1.0447 | none |
| WNT7B     | 0.375  | 0.2502  | 2.7056 | 0.02276 | 0.08  | -3.64 | -0.4776 | none |
| SNRNP25   | -0.273 | -0.2464 | -2.705 | 0.02278 | 0.08  | -3.64 | 1.84231 | none |
| COQ10A    | 0.325  | 0.2837  | 2.7044 | 0.02281 | 0.08  | -3.65 | -0.557  | none |
| MR1       | 0.217  | 0.1095  | 2.7039 | 0.02282 | 0.08  | -3.65 | -0.4083 | none |
| VPS54     | 0.456  | 0.4087  | 2.7035 | 0.02284 | 0.08  | -3.65 | -0.9037 | none |
| DECR1     | -0.282 | -0.3183 | -2.703 | 0.02284 | 0.08  | -3.65 | 1.66751 | none |
| PGM2L1    | 0.29   | 0.2655  | 2.7032 | 0.02285 | 0.08  | -3.65 | -1.1789 | none |
| TMEM50B   | 0.487  | 0.3045  | 2.703  | 0.02286 | 0.08  | -3.65 | -0.3044 | none |
| RABEP2    | 0.426  | 0.4047  | 2.7028 | 0.02287 | 0.08  | -3.65 | -1.174  | none |
| LMNA      | 0.519  | 0.4774  | 2.7028 | 0.02287 | 0.08  | -3.65 | -1.0998 | none |
| ZNF446    | -0.337 | -0.2483 | -2.703 | 0.02287 | 0.08  | -3.65 | 1.91656 | none |
| INTS3     | 0.829  | 0.801   | 2.7026 | 0.02287 | 0.08  | -3.65 | -0.6095 | none |
| DIAPH3    | 0.687  | 0.6087  | 2.7019 | 0.0229  | 0.08  | -3.65 | -0.9112 | none |
| DNAJC25-c | -0.41  | -0.3366 | -2.701 | 0.02295 | 0.08  | -3.65 | 2.03187 | none |
| SLC33A1   | 0.342  | 0.1517  | 2.7007 | 0.02295 | 0.08  | -3.65 | -0.2823 | none |
| AHR       | 0.693  | 0.6743  | 2.7007 | 0.02295 | 0.08  | -3.65 | -0.1453 | none |
| RCAN1     | 0.352  | 0.2705  | 2.6999 | 0.02298 | 0.081 | -3.65 | -0.7092 | none |
| SEZ6L2    | 0.27   | 0.1787  | 2.6998 | 0.02298 | 0.081 | -3.65 | 0.00791 | none |
| MMAB      | 0.386  | 0.317   | 2.6996 | 0.02299 | 0.081 | -3.65 | -1.2237 | none |
| CNGB1     | 0.449  | 0.3497  | 2.6994 | 0.023   | 0.081 | -3.65 | -0.4339 | none |
| ZNF625    | 0.414  | 0.3289  | 2.6989 | 0.02302 | 0.081 | -3.65 | -1.3265 | none |
| SFN       | 0.315  | 0.2594  | 2.6985 | 0.02303 | 0.081 | -3.66 | -0.7737 | none |
| CYP4V2    | 0.625  | 0.4329  | 2.6984 | 0.02304 | 0.081 | -3.66 | -0.9729 | none |
| MBD3      | 0.416  | 0.414   | 2.6982 | 0.02305 | 0.081 | -3.66 | -0.9792 | none |
| TMEM154   | 0.589  | 0.4514  | 2.6976 | 0.02307 | 0.081 | -3.66 | -0.2705 | none |
| ABTB2     | 0.344  | 0.4191  | 2.6974 | 0.02308 | 0.081 | -3.66 | 0.30327 | none |
| FAM3B     | 0.315  | 0.2268  | 2.6974 | 0.02308 | 0.081 | -3.66 | -0.7184 | none |
| GLG1      | 0.584  | 0.5882  | 2.6973 | 0.02308 | 0.081 | -3.66 | 0.2075  | none |
| LARP4B    | 0.719  | 0.7405  | 2.6967 | 0.0231  | 0.081 | -3.66 | -1.1743 | none |
| WDFY2     | 0.615  | 0.5331  | 2.6964 | 0.02311 | 0.081 | -3.66 | -0.972  | none |
| HSPBP1    | -0.246 | -0.1799 | -2.696 | 0.02312 | 0.081 | -3.66 | 1.94518 | none |
| TMC6      | 0.351  | 0.2523  | 2.6957 | 0.02314 | 0.081 | -3.66 | -1.2402 | none |
| DHDH      | 0.504  | 0.3246  | 2.6953 | 0.02316 | 0.081 | -3.66 | 0.23175 | none |
| C10ORF53  | 0.314  | 0.25    | 2.6949 | 0.02318 | 0.081 | -3.66 | -0.567  | none |
| ZFP41     | 0.606  | 0.5635  | 2.6945 | 0.02319 | 0.081 | -3.66 | -0.923  | none |

|          |        |         |        |         |       |       |         |            |
|----------|--------|---------|--------|---------|-------|-------|---------|------------|
| KRTAP9-6 | 0.278  | 0.186   | 2.6939 | 0.02321 | 0.081 | -3.66 | -0.7245 | none       |
| ERFE     | 0.401  | 0.324   | 2.6939 | 0.02322 | 0.081 | -3.66 | -0.5975 | none       |
| ZNF132   | 0.354  | 0.3479  | 2.6924 | 0.02327 | 0.081 | -3.67 | -0.4981 | none       |
| HINT1    | -0.489 | -0.4991 | -2.692 | 0.02327 | 0.081 | -3.67 | 1.75881 | none       |
| ADAP2    | 0.452  | 0.2946  | 2.692  | 0.02329 | 0.081 | -3.67 | -1.0958 | none       |
| MED8     | -0.249 | -0.2333 | -2.691 | 0.02331 | 0.081 | -3.67 | 1.20927 | none       |
| TBC1D4   | 0.365  | 0.3117  | 2.6912 | 0.02332 | 0.081 | -3.67 | 0.15151 | none       |
| COMMD10  | 0.352  | 0.1945  | 2.691  | 0.02333 | 0.081 | -3.67 | -0.1192 | none       |
| ALG11    | 0.397  | 0.3344  | 2.6904 | 0.02335 | 0.081 | -3.67 | -1.061  | none       |
| SVIP     | -0.53  | -0.4604 | -2.69  | 0.02335 | 0.081 | -3.67 | 0.82021 | none       |
| ISCA1    | 0.328  | 0.1874  | 2.6904 | 0.02335 | 0.081 | -3.67 | -0.4636 | none       |
| INTS1    | 0.615  | 0.6773  | 2.6898 | 0.02337 | 0.081 | -3.67 | -0.9613 | none       |
| OAZ1     | -0.359 | -0.2918 | -2.689 | 0.02339 | 0.081 | -3.67 | 1.76376 | none       |
| CDK9     | 0.508  | 0.4403  | 2.6894 | 0.02339 | 0.081 | -3.67 | -0.2796 | none       |
| CEP350   | 0.752  | 0.824   | 2.6892 | 0.0234  | 0.081 | -3.67 | -0.6724 | none       |
| CCDC142  | 0.368  | 0.2557  | 2.6886 | 0.02342 | 0.082 | -3.67 | -1.2888 | none       |
| ANKUB1   | 0.345  | 0.2648  | 2.688  | 0.02345 | 0.082 | -3.67 | -1.1275 | none       |
| OR51D1   | 0.302  | 0.212   | 2.688  | 0.02345 | 0.082 | -3.67 | -0.7724 | none       |
| CYB561D1 | 0.339  | 0.2743  | 2.6866 | 0.0235  | 0.082 | -3.67 | -0.567  | none       |
| PSMB7    | -0.288 | -0.2685 | -2.686 | 0.02351 | 0.082 | -3.68 | 2.00672 | none       |
| PCDHA10  | 0.19   | 0.1515  | 2.6862 | 0.02352 | 0.082 | -3.68 | -1.0626 | none       |
| LRRC58   | 0.301  | 0.2313  | 2.6859 | 0.02353 | 0.082 | -3.68 | -0.0869 | none       |
| SLC27A1  | 0.442  | 0.3466  | 2.6857 | 0.02354 | 0.082 | -3.68 | -1.3033 | none       |
| ACIN1    | 0.875  | 0.929   | 2.6856 | 0.02354 | 0.082 | -3.68 | -0.9956 | none       |
| OR6Y1    | 0.254  | 0.1835  | 2.685  | 0.02357 | 0.082 | -3.68 | -0.8117 | none       |
| ICAM1    | 0.694  | 0.7191  | 2.6849 | 0.02357 | 0.082 | -3.68 | -0.78   | none       |
| CNOT4    | 0.637  | 0.5597  | 2.6849 | 0.02357 | 0.082 | -3.68 | -1.3225 | none       |
| NPIP8    | 0.425  | 0.3202  | 2.6847 | 0.02358 | 0.082 | -3.68 | -1.3155 | none       |
| SPEF2    | 0.416  | 0.3023  | 2.6841 | 0.0236  | 0.082 | -3.68 | -0.6182 | none       |
| WWP1     | 0.423  | 0.425   | 2.684  | 0.02361 | 0.082 | -3.68 | -0.8233 | none       |
| ZNF407   | 0.518  | 0.4942  | 2.684  | 0.02361 | 0.082 | -3.68 | -1.1541 | none       |
| GOLGA8B  | 0.526  | 0.537   | 2.684  | 0.02361 | 0.082 | -3.68 | -0.7019 | none       |
| MED24    | 0.403  | 0.408   | 2.6837 | 0.02362 | 0.082 | -3.68 | -1.0188 | none       |
| MRPL16   | -0.211 | -0.158  | -2.683 | 0.02363 | 0.082 | -3.68 | 0.55318 | none       |
| COX20    | -0.383 | -0.3992 | -2.683 | 0.02364 | 0.082 | -3.68 | 1.03035 | none       |
| KLHL9    | 0.265  | 0.1703  | 2.6828 | 0.02365 | 0.082 | -3.68 | -0.609  | none       |
| PCDHGB6  | 0.302  | 0.224   | 2.6828 | 0.02365 | 0.082 | -3.68 | -1.4702 | none       |
| ATAD5    | 0.607  | 0.6384  | 2.6824 | 0.02367 | 0.082 | -3.68 | -0.8426 | none       |
| SPATA17  | 0.684  | 0.7027  | 2.6822 | 0.02368 | 0.082 | -3.68 | -1.0428 | none       |
| PSMD13   | -0.3   | -0.2786 | -2.682 | 0.02369 | 0.082 | -3.68 | 2.12508 | AA-related |

|          |        |         |        |         |       |       |         |            |
|----------|--------|---------|--------|---------|-------|-------|---------|------------|
| IPP      | 0.402  | 0.3862  | 2.6813 | 0.02371 | 0.082 | -3.68 | -0.1792 | none       |
| SHKBP1   | 0.313  | 0.2353  | 2.6812 | 0.02372 | 0.082 | -3.68 | -0.106  | none       |
| SEC24B   | 0.472  | 0.4417  | 2.6809 | 0.02373 | 0.082 | -3.68 | 0.09066 | none       |
| DNAJB11  | -0.231 | -0.182  | -2.679 | 0.02379 | 0.082 | -3.69 | 2.29798 | AA-related |
| DGKE     | 0.288  | 0.2431  | 2.6794 | 0.02379 | 0.082 | -3.69 | -0.0973 | none       |
| ANKRD13E | 0.317  | 0.2325  | 2.6785 | 0.02383 | 0.082 | -3.69 | -1.2472 | none       |
| USP19    | 0.561  | 0.5755  | 2.6784 | 0.02383 | 0.082 | -3.69 | -0.4391 | none       |
| SHISA2   | 0.211  | 0.1791  | 2.6779 | 0.02385 | 0.082 | -3.69 | 0.26686 | none       |
| PLEKHG2  | 0.764  | 0.6828  | 2.6777 | 0.02386 | 0.082 | -3.69 | -0.6903 | none       |
| SNTN     | 0.254  | 0.1889  | 2.6768 | 0.02389 | 0.083 | -3.69 | -0.6998 | none       |
| RECQL5   | 0.577  | 0.5765  | 2.6764 | 0.02391 | 0.083 | -3.69 | -0.8051 | none       |
| SEC61G   | -0.595 | -0.594  | -2.676 | 0.02391 | 0.083 | -3.69 | 2.04981 | none       |
| SLC8A1   | -0.298 | -0.3009 | -2.676 | 0.02392 | 0.083 | -3.69 | 0.65398 | none       |
| PFN1     | -0.318 | -0.2354 | -2.675 | 0.02395 | 0.083 | -3.69 | 1.47672 | none       |
| WDR48    | 0.421  | 0.3441  | 2.6749 | 0.02397 | 0.083 | -3.69 | -0.1983 | none       |
| IP6K2    | 0.302  | 0.2702  | 2.6746 | 0.02399 | 0.083 | -3.69 | -0.3995 | none       |
| MFSD6    | 0.608  | 0.5334  | 2.6744 | 0.02399 | 0.083 | -3.69 | -0.7463 | none       |
| PSMA7    | -0.319 | -0.2692 | -2.673 | 0.02403 | 0.083 | -3.7  | 1.58573 | none       |
| UBXN11   | 0.407  | 0.3681  | 2.6728 | 0.02406 | 0.083 | -3.7  | -0.4001 | none       |
| DYNLL1   | -0.431 | -0.4478 | -2.673 | 0.02407 | 0.083 | -3.7  | 1.3613  | none       |
| KCTD20   | 0.379  | 0.3094  | 2.6724 | 0.02407 | 0.083 | -3.7  | -0.9287 | none       |
| HMGB1    | -0.204 | -0.1478 | -2.672 | 0.02408 | 0.083 | -3.7  | 1.92993 | none       |
| ACCS     | 0.46   | 0.2578  | 2.6719 | 0.02409 | 0.083 | -3.7  | -0.1548 | none       |
| VPS45    | 0.454  | 0.3688  | 2.6715 | 0.02411 | 0.083 | -3.7  | -1.3203 | none       |
| GP1BB    | 0.364  | 0.2857  | 2.6711 | 0.02412 | 0.083 | -3.7  | -0.5452 | none       |
| MROH1    | 0.445  | 0.3546  | 2.6706 | 0.02415 | 0.083 | -3.7  | -0.9577 | none       |
| NEK1     | 0.476  | 0.4532  | 2.6705 | 0.02415 | 0.083 | -3.7  | -0.391  | none       |
| SHQ1     | 0.313  | 0.221   | 2.6702 | 0.02416 | 0.083 | -3.7  | -1.4295 | none       |
| RBM20    | 0.489  | 0.3299  | 2.6697 | 0.02418 | 0.083 | -3.7  | -0.887  | none       |
| TMED8    | 0.302  | 0.2698  | 2.6697 | 0.02418 | 0.083 | -3.7  | -1.3718 | none       |
| RAB14    | -0.227 | -0.1642 | -2.669 | 0.02421 | 0.083 | -3.7  | 1.17695 | none       |
| ZNF652   | 0.357  | 0.2874  | 2.6688 | 0.02422 | 0.083 | -3.7  | -1.3768 | none       |
| RP2      | 0.321  | 0.1208  | 2.6686 | 0.02423 | 0.083 | -3.7  | -0.7402 | none       |
| NAAA     | 0.394  | 0.263   | 2.6683 | 0.02424 | 0.083 | -3.7  | -0.6312 | none       |
| TMC5     | 0.26   | 0.2164  | 2.6682 | 0.02425 | 0.083 | -3.71 | -1.0834 | none       |
| PXN      | 0.342  | 0.2957  | 2.6677 | 0.02427 | 0.083 | -3.71 | -0.2924 | none       |
| PPP1R21  | 0.453  | 0.4162  | 2.6673 | 0.02428 | 0.083 | -3.71 | 0.45762 | none       |
| CFAP161  | 0.429  | 0.3607  | 2.6673 | 0.02428 | 0.083 | -3.71 | 0.81303 | none       |
| ZNF317   | 0.52   | 0.5048  | 2.6672 | 0.02428 | 0.083 | -3.71 | -0.5388 | none       |
| PTPN4    | 0.629  | 0.529   | 2.6664 | 0.02432 | 0.084 | -3.71 | -0.8271 | none       |

|          |        |         |        |         |       |       |         |            |
|----------|--------|---------|--------|---------|-------|-------|---------|------------|
| PIGT     | 0.258  | 0.1825  | 2.6657 | 0.02435 | 0.084 | -3.71 | -0.7258 | none       |
| ARFGAP3  | 0.36   | 0.2556  | 2.6656 | 0.02435 | 0.084 | -3.71 | -0.4728 | none       |
| SYT14    | 0.247  | 0.1622  | 2.6642 | 0.02441 | 0.084 | -3.71 | -1.1386 | none       |
| TES      | 0.335  | 0.2395  | 2.6636 | 0.02444 | 0.084 | -3.71 | -1.4012 | none       |
| POLR2G   | -0.404 | -0.4015 | -2.663 | 0.02444 | 0.084 | -3.71 | 1.92958 | none       |
| PITPNA   | -0.427 | -0.2695 | -2.663 | 0.02445 | 0.084 | -3.71 | 0.25511 | none       |
| SNRPF    | -0.438 | -0.4174 | -2.663 | 0.02446 | 0.084 | -3.71 | 1.59105 | none       |
| RBM14-RE | 0.435  | 0.5175  | 2.6621 | 0.02449 | 0.084 | -3.72 | -0.5692 | none       |
| RARS     | 0.266  | 0.1814  | 2.6621 | 0.0245  | 0.084 | -3.72 | -0.636  | none       |
| RETSAT   | 0.239  | 0.1826  | 2.6614 | 0.02452 | 0.084 | -3.72 | -0.5627 | none       |
| PSMB2    | -0.285 | -0.252  | -2.661 | 0.02455 | 0.084 | -3.72 | 2.52701 | AA-related |
| PSMA5    | -0.459 | -0.4569 | -2.661 | 0.02456 | 0.084 | -3.72 | 1.97969 | none       |
| MT-CO3   | -0.376 | -0.3512 | -2.661 | 0.02456 | 0.084 | -3.72 | 1.17693 | none       |
| OR7A5    | 0.184  | 0.1437  | 2.6605 | 0.02456 | 0.084 | -3.72 | -0.9019 | none       |
| TLCD1    | 0.728  | 0.5135  | 2.6603 | 0.02457 | 0.084 | -3.72 | -0.9137 | none       |
| GOLGA8A  | 0.506  | 0.5373  | 2.6594 | 0.02461 | 0.084 | -3.72 | -0.7318 | none       |
| IL21R    | 0.248  | 0.2421  | 2.6589 | 0.02463 | 0.084 | -3.72 | 0.66404 | none       |
| ARPC4    | -0.445 | -0.4039 | -2.659 | 0.02463 | 0.084 | -3.72 | 0.98394 | none       |
| BAZ1A    | 0.864  | 0.8656  | 2.6587 | 0.02464 | 0.084 | -3.72 | -0.9068 | none       |
| RBM39    | 0.337  | 0.3157  | 2.6586 | 0.02464 | 0.084 | -3.72 | -1.3108 | none       |
| GABARAP  | -0.479 | -0.4945 | -2.658 | 0.02467 | 0.084 | -3.72 | 1.8725  | none       |
| SCNN1G   | 0.192  | 0.1382  | 2.6579 | 0.02467 | 0.084 | -3.72 | 0.10611 | none       |
| HIST1H2A | 0.442  | 0.3729  | 2.6574 | 0.02469 | 0.084 | -3.72 | -0.4018 | none       |
| FRYL     | 0.752  | 0.7334  | 2.6573 | 0.02469 | 0.084 | -3.72 | -0.8286 | none       |
| GSKIP    | -0.39  | -0.4382 | -2.657 | 0.02473 | 0.085 | -3.72 | 1.20558 | none       |
| CAST     | 1.182  | 1.182   | 2.6562 | 0.02474 | 0.085 | -3.72 | -0.6923 | none       |
| TMEM167  | 0.253  | 0.1373  | 2.6555 | 0.02477 | 0.085 | -3.73 | -0.8686 | none       |
| SAAL1    | -0.304 | -0.2602 | -2.655 | 0.02478 | 0.085 | -3.73 | 1.93546 | none       |
| GORAB    | 0.514  | 0.4467  | 2.6531 | 0.02487 | 0.085 | -3.73 | -0.9718 | none       |
| PGGHG    | 0.322  | 0.2914  | 2.6524 | 0.0249  | 0.085 | -3.73 | 0.02265 | none       |
| POMP     | -0.422 | -0.4165 | -2.652 | 0.0249  | 0.085 | -3.73 | 1.27617 | none       |
| OGDH     | 0.427  | 0.4041  | 2.6523 | 0.02491 | 0.085 | -3.73 | -0.676  | none       |
| ATXN7    | 0.528  | 0.533   | 2.6518 | 0.02493 | 0.085 | -3.73 | -1.1435 | none       |
| APP      | 0.485  | 0.4408  | 2.6517 | 0.02493 | 0.085 | -3.73 | -0.8697 | none       |
| VDAC3    | -0.348 | -0.3562 | -2.651 | 0.02495 | 0.085 | -3.73 | 1.82504 | none       |
| NRIP1    | 0.992  | 0.8905  | 2.6511 | 0.02496 | 0.085 | -3.73 | -0.9954 | none       |
| GALNT5   | 0.213  | 0.1452  | 2.651  | 0.02496 | 0.085 | -3.73 | -1.3461 | none       |
| DDX56    | -0.318 | -0.2169 | -2.65  | 0.025   | 0.085 | -3.73 | 2.2244  | AA-related |
| SART3    | 0.67   | 0.6898  | 2.6492 | 0.02504 | 0.085 | -3.74 | -0.3913 | none       |
| 8-Sep    | 0.313  | 0.2877  | 2.6481 | 0.02508 | 0.085 | -3.74 | -0.5467 | none       |

|         |        |         |        |         |       |       |         |            |
|---------|--------|---------|--------|---------|-------|-------|---------|------------|
| SAP18   | -0.322 | -0.3184 | -2.648 | 0.02509 | 0.085 | -3.74 | 1.4247  | none       |
| AURKA   | 0.255  | 0.1696  | 2.6478 | 0.0251  | 0.085 | -3.74 | -0.2062 | none       |
| SUSD5   | 0.23   | 0.1653  | 2.6476 | 0.0251  | 0.086 | -3.74 | -0.9378 | none       |
| KIF1B   | 0.654  | 0.6172  | 2.6475 | 0.02511 | 0.086 | -3.74 | -0.9648 | none       |
| TYW1    | 0.449  | 0.4225  | 2.6467 | 0.02514 | 0.086 | -3.74 | -0.8826 | none       |
| CASS4   | 0.27   | 0.1977  | 2.6466 | 0.02515 | 0.086 | -3.74 | -1.3788 | none       |
| POC1A   | -0.38  | -0.3314 | -2.646 | 0.02518 | 0.086 | -3.74 | 1.70372 | none       |
| CTBP2   | 0.497  | 0.4844  | 2.6457 | 0.02518 | 0.086 | -3.74 | -0.7224 | none       |
| BDP1    | 0.573  | 0.5167  | 2.6454 | 0.0252  | 0.086 | -3.74 | -0.8914 | none       |
| NADK    | 0.348  | 0.3061  | 2.6448 | 0.02522 | 0.086 | -3.74 | -0.1075 | none       |
| ZCCHC18 | 0.659  | 0.5212  | 2.6446 | 0.02523 | 0.086 | -3.74 | -0.6181 | none       |
| EPS8L1  | -0.532 | -0.4669 | -2.644 | 0.02525 | 0.086 | -3.74 | 1.07139 | none       |
| CRY2    | 0.369  | 0.3194  | 2.6431 | 0.0253  | 0.086 | -3.75 | -1.1535 | none       |
| TAS1R3  | 0.345  | 0.2376  | 2.6428 | 0.02531 | 0.086 | -3.75 | -0.7149 | none       |
| GPBP1L1 | 0.436  | 0.3397  | 2.6424 | 0.02533 | 0.086 | -3.75 | -1.1853 | none       |
| ADIRF   | 0.478  | 0.4315  | 2.6416 | 0.02536 | 0.086 | -3.75 | 0.9918  | none       |
| ETF1    | -0.305 | -0.2355 | -2.642 | 0.02536 | 0.086 | -3.75 | 2.5045  | AA-related |
| ZNF541  | -0.277 | -0.2325 | -2.641 | 0.02537 | 0.086 | -3.75 | 1.01319 | none       |
| ACAD11  | 0.35   | 0.2806  | 2.641  | 0.02538 | 0.086 | -3.75 | -0.1403 | none       |
| GTPBP8  | 0.23   | 0.1269  | 2.641  | 0.02539 | 0.086 | -3.75 | -0.4221 | none       |
| AZU1    | 0.327  | 0.2106  | 2.6405 | 0.02541 | 0.086 | -3.75 | -1.2621 | none       |
| KDM5A   | 0.725  | 0.7182  | 2.6396 | 0.02545 | 0.086 | -3.75 | -0.5021 | none       |
| PLGLB1  | 0.718  | 0.596   | 2.6392 | 0.02546 | 0.086 | -3.75 | -1.2699 | none       |
| SLC12A8 | 0.449  | 0.3148  | 2.6392 | 0.02546 | 0.086 | -3.75 | -1.1126 | none       |
| ITPK1   | 0.353  | 0.307   | 2.6391 | 0.02547 | 0.086 | -3.75 | -0.4452 | none       |
| HS2ST1  | -0.367 | -0.2562 | -2.638 | 0.0255  | 0.086 | -3.75 | 0.48569 | none       |
| CMTR1   | 0.327  | 0.276   | 2.6383 | 0.0255  | 0.086 | -3.75 | -1.21   | none       |
| SPOCD1  | 0.454  | 0.3326  | 2.6382 | 0.02551 | 0.086 | -3.75 | -1.2345 | none       |
| TNIP3   | 0.462  | 0.375   | 2.638  | 0.02551 | 0.086 | -3.75 | -1.349  | none       |
| CSF2    | -0.385 | -0.1884 | -2.637 | 0.02554 | 0.087 | -3.76 | 0.80249 | none       |
| HIP1    | 0.658  | 0.667   | 2.6367 | 0.02557 | 0.087 | -3.76 | -1.1298 | none       |
| LPAR2   | 0.212  | 0.1394  | 2.6362 | 0.02559 | 0.087 | -3.76 | -0.8906 | none       |
| SPATA33 | 0.463  | 0.4229  | 2.6358 | 0.02561 | 0.087 | -3.76 | -0.4293 | none       |
| ZNF66   | 0.578  | 0.3999  | 2.6353 | 0.02563 | 0.087 | -3.76 | 0.00362 | none       |
| CACYBP  | -0.199 | -0.143  | -2.634 | 0.02567 | 0.087 | -3.76 | 1.02115 | none       |
| APH1B   | 0.67   | 0.4307  | 2.6342 | 0.02568 | 0.087 | -3.76 | -0.7238 | none       |
| METRNL  | 0.425  | 0.3833  | 2.6341 | 0.02569 | 0.087 | -3.76 | 1.13357 | none       |
| SYNGAP1 | 1.167  | 1.231   | 2.6338 | 0.0257  | 0.087 | -3.76 | 0.44628 | none       |
| CHCHD6  | 0.362  | 0.2921  | 2.6336 | 0.0257  | 0.087 | -3.76 | -0.1257 | none       |
| TGOLN2  | 0.529  | 0.5451  | 2.6335 | 0.02571 | 0.087 | -3.76 | -0.3682 | none       |



|          |        |         |        |         |       |       |         |            |
|----------|--------|---------|--------|---------|-------|-------|---------|------------|
| TEX13D   | 0.39   | 0.2458  | 2.6335 | 0.02571 | 0.087 | -3.76 | -0.8896 | none       |
| TRAPPC3L | 0.252  | 0.1998  | 2.6327 | 0.02574 | 0.087 | -3.76 | -1.1033 | none       |
| GSTO1    | -0.549 | -0.5543 | -2.632 | 0.02576 | 0.087 | -3.76 | 1.91211 | none       |
| C1D      | -0.498 | -0.5441 | -2.632 | 0.02576 | 0.087 | -3.76 | 1.82326 | none       |
| DISP1    | -0.297 | -0.1714 | -2.631 | 0.02581 | 0.087 | -3.77 | 0.96348 | none       |
| FAM81A   | -0.378 | -0.2476 | -2.631 | 0.02583 | 0.087 | -3.77 | 0.32057 | none       |
| COMT     | -0.286 | -0.2247 | -2.631 | 0.02583 | 0.087 | -3.77 | 2.02636 | none       |
| ARVCF    | 0.455  | 0.3385  | 2.6306 | 0.02584 | 0.087 | -3.77 | 0.07411 | none       |
| TVP23A   | 0.489  | 0.3356  | 2.6305 | 0.02584 | 0.087 | -3.77 | -1.2985 | none       |
| EXOC1    | 0.394  | 0.3194  | 2.6296 | 0.02588 | 0.087 | -3.77 | -0.1551 | none       |
| TAF4B    | 0.503  | 0.5282  | 2.629  | 0.02591 | 0.087 | -3.77 | 0.88134 | none       |
| GFAP     | 0.394  | 0.2385  | 2.6289 | 0.02591 | 0.087 | -3.77 | -0.3845 | none       |
| EIF2S2   | -0.27  | -0.1814 | -2.628 | 0.02594 | 0.087 | -3.77 | 2.23469 | AA-related |
| SMNDC1   | -0.349 | -0.3577 | -2.628 | 0.02595 | 0.087 | -3.77 | 0.53062 | none       |
| LEO1     | 0.841  | 0.8036  | 2.627  | 0.02599 | 0.088 | -3.77 | -1.0383 | none       |
| CCDC144A | 0.381  | 0.2665  | 2.6264 | 0.02602 | 0.088 | -3.77 | -1.3876 | none       |
| PSMD14   | -0.295 | -0.2865 | -2.626 | 0.02603 | 0.088 | -3.77 | 2.02982 | none       |
| WDR27    | 0.44   | 0.3467  | 2.6252 | 0.02607 | 0.088 | -3.78 | 0.15485 | none       |
| SPCS1    | -0.432 | -0.4439 | -2.624 | 0.02612 | 0.088 | -3.78 | 2.16556 | AA-related |
| DDX55    | 0.44   | 0.4429  | 2.6239 | 0.02613 | 0.088 | -3.78 | -1.1155 | none       |
| NHLRC1   | 0.239  | 0.173   | 2.6232 | 0.02616 | 0.088 | -3.78 | -0.7475 | none       |
| RPL24    | -0.476 | -0.4744 | -2.623 | 0.02616 | 0.088 | -3.78 | 1.42408 | none       |
| OGFOD1   | 0.341  | 0.297   | 2.6232 | 0.02616 | 0.088 | -3.78 | -0.8498 | none       |
| STT3B    | 0.389  | 0.2456  | 2.6231 | 0.02617 | 0.088 | -3.78 | -1.1198 | none       |
| CC2D1B   | 0.559  | 0.5923  | 2.623  | 0.02617 | 0.088 | -3.78 | -0.2659 | none       |
| MED4     | 0.308  | 0.2377  | 2.6229 | 0.02617 | 0.088 | -3.78 | -1.0212 | none       |
| DLG1     | 0.662  | 0.5659  | 2.6228 | 0.02618 | 0.088 | -3.78 | -0.861  | none       |
| HUNK     | 0.327  | 0.2686  | 2.6225 | 0.02619 | 0.088 | -3.78 | -0.3874 | none       |
| TOMM22   | -0.41  | -0.4167 | -2.623 | 0.02619 | 0.088 | -3.78 | 2.32968 | AA-related |
| DUT      | -0.285 | -0.2608 | -2.621 | 0.02626 | 0.088 | -3.78 | 2.00488 | none       |
| COX7B2   | 0.388  | 0.3418  | 2.6203 | 0.02629 | 0.088 | -3.78 | 1.3191  | none       |
| MYH15    | 0.255  | 0.18    | 2.6198 | 0.02631 | 0.088 | -3.78 | -0.9682 | none       |
| LMAN1    | -0.324 | -0.2386 | -2.62  | 0.02632 | 0.088 | -3.78 | 2.19224 | AA-related |
| MGA      | 0.809  | 0.7921  | 2.6196 | 0.02632 | 0.088 | -3.78 | -1.0147 | none       |
| GMFG     | -0.361 | -0.3693 | -2.62  | 0.02632 | 0.088 | -3.78 | 1.35066 | none       |
| RBM5     | 0.456  | 0.4922  | 2.6194 | 0.02633 | 0.088 | -3.79 | -0.7473 | none       |
| ADCK1    | 0.462  | 0.3516  | 2.6191 | 0.02634 | 0.088 | -3.79 | -0.3279 | none       |
| DOCK8    | 0.767  | 0.7231  | 2.6191 | 0.02635 | 0.088 | -3.79 | -0.8905 | none       |
| PRKD3    | 0.534  | 0.3864  | 2.6185 | 0.02637 | 0.088 | -3.79 | -1.2191 | none       |
| TMEM255  | -0.202 | -0.1148 | -2.618 | 0.0264  | 0.089 | -3.79 | -0.0608 | none       |

|          |        |         |        |         |       |       |         |      |
|----------|--------|---------|--------|---------|-------|-------|---------|------|
| KCNQ2    | -0.909 | -0.6884 | -2.617 | 0.02642 | 0.089 | -3.79 | 0.98172 | none |
| FEZ2     | 0.38   | 0.2568  | 2.6172 | 0.02643 | 0.089 | -3.79 | -1.1483 | none |
| FNTB     | 0.279  | 0.2555  | 2.6168 | 0.02645 | 0.089 | -3.79 | -1.3214 | none |
| C11ORF54 | 0.373  | 0.1812  | 2.6163 | 0.02647 | 0.089 | -3.79 | -1.0881 | none |
| OCRL     | 0.254  | 0.2111  | 2.6163 | 0.02647 | 0.089 | -3.79 | -0.5563 | none |
| CSMD2    | 0.256  | 0.1556  | 2.6153 | 0.02651 | 0.089 | -3.79 | -1.3352 | none |
| RFC1     | 0.844  | 0.8897  | 2.6153 | 0.02651 | 0.089 | -3.79 | -0.4589 | none |
| CSRNP1   | -0.385 | -0.264  | -2.615 | 0.02653 | 0.089 | -3.79 | 1.80596 | none |
| DLG3     | 0.508  | 0.4206  | 2.6148 | 0.02653 | 0.089 | -3.79 | -0.9517 | none |
| MMADHC   | -0.43  | -0.444  | -2.615 | 0.02655 | 0.089 | -3.79 | 1.55083 | none |
| PLA2R1   | 0.22   | 0.1685  | 2.6141 | 0.02657 | 0.089 | -3.79 | -1.459  | none |
| IL11     | 0.323  | 0.2379  | 2.6136 | 0.02659 | 0.089 | -3.79 | -1.0666 | none |
| VNN2     | 0.261  | 0.0975  | 2.6134 | 0.0266  | 0.089 | -3.79 | 0.62504 | none |
| PHOSPHO: | 0.463  | 0.3059  | 2.6127 | 0.02663 | 0.089 | -3.8  | -0.6993 | none |
| TUBGCP2  | 0.417  | 0.3861  | 2.6124 | 0.02664 | 0.089 | -3.8  | -1.1907 | none |
| PRAM1    | 0.533  | 0.3536  | 2.6113 | 0.02669 | 0.089 | -3.8  | -1.4356 | none |
| LYPLAL1  | -0.501 | -0.4694 | -2.611 | 0.0267  | 0.089 | -3.8  | 1.72    | none |
| SNRPB    | -0.37  | -0.3052 | -2.611 | 0.02672 | 0.089 | -3.8  | 1.34227 | none |
| CD52     | -0.526 | -0.5451 | -2.611 | 0.02673 | 0.089 | -3.8  | 1.84605 | none |
| CHST9    | 0.188  | 0.1374  | 2.6099 | 0.02675 | 0.089 | -3.8  | -1.4566 | none |
| COL6A3   | 0.567  | 0.6308  | 2.6099 | 0.02675 | 0.089 | -3.8  | -0.4917 | none |
| CYP2J2   | -0.273 | -0.2537 | -2.609 | 0.02679 | 0.089 | -3.8  | 0.07828 | none |
| MBOAT7   | 0.24   | 0.2443  | 2.609  | 0.0268  | 0.089 | -3.8  | -0.1019 | none |
| XBP1     | 0.281  | 0.2019  | 2.6084 | 0.02682 | 0.09  | -3.8  | -0.3261 | none |
| ARPC5    | -0.314 | -0.3146 | -2.608 | 0.02683 | 0.09  | -3.8  | 1.51831 | none |
| MSMO1    | 0.36   | 0.2028  | 2.6083 | 0.02683 | 0.09  | -3.8  | -0.4917 | none |
| ABCB4    | -0.485 | -0.3952 | -2.608 | 0.02683 | 0.09  | -3.8  | 1.40564 | none |
| NAA15    | 0.814  | 0.7694  | 2.6078 | 0.02685 | 0.09  | -3.8  | -0.6925 | none |
| ADI1     | -0.288 | -0.2551 | -2.607 | 0.02688 | 0.09  | -3.81 | 1.73275 | none |
| NME2     | -0.34  | -0.3133 | -2.607 | 0.0269  | 0.09  | -3.81 | 1.94616 | none |
| PRLR     | -0.359 | -0.2841 | -2.606 | 0.02691 | 0.09  | -3.81 | 0.4949  | none |
| OR8B8    | 0.252  | 0.1732  | 2.6058 | 0.02694 | 0.09  | -3.81 | -1.4119 | none |
| N4BP2L1  | 0.498  | 0.356   | 2.6057 | 0.02694 | 0.09  | -3.81 | -0.6104 | none |
| HCFC1R1  | -0.425 | -0.4189 | -2.606 | 0.02695 | 0.09  | -3.81 | 0.9919  | none |
| EIF5A    | -0.319 | -0.2356 | -2.604 | 0.02702 | 0.09  | -3.81 | 1.51271 | none |
| NPW      | 0.473  | 0.4166  | 2.6035 | 0.02705 | 0.09  | -3.81 | -0.9846 | none |
| GJD4     | 0.262  | 0.2203  | 2.6025 | 0.02709 | 0.09  | -3.81 | -1.1586 | none |
| MON1B    | 0.403  | 0.3386  | 2.6021 | 0.02711 | 0.09  | -3.81 | -0.3942 | none |
| SLFN13   | 0.507  | 0.4336  | 2.6016 | 0.02713 | 0.09  | -3.81 | 0.07817 | none |
| RAPGEF3  | 0.265  | 0.1518  | 2.6014 | 0.02715 | 0.09  | -3.81 | -0.7387 | none |

|          |        |         |        |         |       |       |         |            |
|----------|--------|---------|--------|---------|-------|-------|---------|------------|
| SLCO5A1  | 0.237  | 0.2325  | 2.6013 | 0.02715 | 0.09  | -3.81 | -0.78   | none       |
| ARFGEF3  | 0.288  | 0.244   | 2.6012 | 0.02715 | 0.09  | -3.81 | -1.3756 | none       |
| GPATCH2L | 0.252  | 0.2437  | 2.6008 | 0.02717 | 0.09  | -3.82 | -0.8565 | none       |
| NOP10    | -0.406 | -0.3801 | -2.599 | 0.02724 | 0.091 | -3.82 | 1.56471 | none       |
| FAM78B   | 0.268  | 0.2534  | 2.5991 | 0.02725 | 0.091 | -3.82 | -0.4797 | none       |
| SORL1    | 0.602  | 0.5333  | 2.5989 | 0.02726 | 0.091 | -3.82 | -0.6972 | none       |
| PASK     | 0.312  | 0.2313  | 2.5988 | 0.02726 | 0.091 | -3.82 | -0.6976 | none       |
| MTSS1    | 0.56   | 0.3971  | 2.5982 | 0.02729 | 0.091 | -3.82 | -1.0938 | none       |
| ENTPD5   | 0.272  | 0.1833  | 2.5981 | 0.02729 | 0.091 | -3.82 | 1.2347  | none       |
| PPP1R14B | -0.299 | -0.2307 | -2.597 | 0.02733 | 0.091 | -3.82 | 0.01686 | none       |
| MAP1LC3C | 0.839  | 0.5451  | 2.5973 | 0.02733 | 0.091 | -3.82 | -0.6506 | none       |
| ZNF646   | 0.392  | 0.4479  | 2.5972 | 0.02734 | 0.091 | -3.82 | -0.3116 | none       |
| ATG9A    | 0.334  | 0.3416  | 2.5965 | 0.02737 | 0.091 | -3.82 | 0.66317 | none       |
| TANC2    | 0.327  | 0.3042  | 2.5964 | 0.02737 | 0.091 | -3.82 | -0.3862 | none       |
| BTN2A2   | -0.35  | -0.2271 | -2.596 | 0.02739 | 0.091 | -3.82 | 1.96084 | none       |
| TMEM253  | -0.237 | -0.2167 | -2.596 | 0.0274  | 0.091 | -3.82 | 0.69777 | none       |
| HSF4     | 0.581  | 0.5372  | 2.5957 | 0.02741 | 0.091 | -3.82 | -0.3359 | none       |
| RBMS3    | 0.328  | 0.2465  | 2.5956 | 0.02741 | 0.091 | -3.82 | -0.8368 | none       |
| UGGT1    | 0.771  | 0.7509  | 2.5952 | 0.02743 | 0.091 | -3.82 | -0.5835 | none       |
| TK1      | -0.457 | -0.4011 | -2.595 | 0.02745 | 0.091 | -3.83 | 2.52957 | AA-related |
| ZNHIT6   | 0.522  | 0.4815  | 2.5946 | 0.02746 | 0.091 | -3.83 | -0.745  | none       |
| VAMP8    | -0.353 | -0.3626 | -2.594 | 0.02747 | 0.091 | -3.83 | 1.78297 | none       |
| TMEM79   | 0.329  | 0.3158  | 2.5943 | 0.02747 | 0.091 | -3.83 | -0.6599 | none       |
| CEP63    | 0.629  | 0.5976  | 2.5939 | 0.02749 | 0.091 | -3.83 | -0.8628 | none       |
| ADH1C    | 0.24   | 0.1684  | 2.5935 | 0.02751 | 0.091 | -3.83 | -0.6233 | none       |
| LIMD1    | 0.651  | 0.6036  | 2.593  | 0.02753 | 0.091 | -3.83 | -0.737  | none       |
| FANCE    | 0.239  | 0.2506  | 2.5925 | 0.02756 | 0.091 | -3.83 | -0.5485 | none       |
| MAEA     | 0.275  | 0.2391  | 2.5924 | 0.02756 | 0.091 | -3.83 | -0.8045 | none       |
| FAM117B  | 0.442  | 0.3687  | 2.592  | 0.02758 | 0.091 | -3.83 | -1.2873 | none       |
| SMCHD1   | 0.798  | 0.769   | 2.5918 | 0.02759 | 0.091 | -3.83 | -0.4184 | none       |
| TMEM123  | 0.303  | 0.2309  | 2.5916 | 0.0276  | 0.091 | -3.83 | 0.8304  | none       |
| SMARCC2  | 0.747  | 0.729   | 2.5906 | 0.02765 | 0.091 | -3.83 | -0.8651 | none       |
| EDEM3    | 0.55   | 0.4666  | 2.5906 | 0.02765 | 0.091 | -3.83 | -1.0404 | none       |
| CLMP     | 0.286  | 0.1939  | 2.5905 | 0.02765 | 0.091 | -3.83 | -1.0681 | none       |
| CNTLN    | 0.42   | 0.3033  | 2.5904 | 0.02765 | 0.091 | -3.83 | -1.1751 | none       |
| CCDC61   | 0.307  | 0.2525  | 2.59   | 0.02767 | 0.091 | -3.83 | 0.82348 | none       |
| ADGRA3   | 0.479  | 0.5759  | 2.5899 | 0.02768 | 0.091 | -3.83 | 0.45167 | none       |
| SDK1     | -0.409 | -0.3593 | -2.59  | 0.02769 | 0.091 | -3.83 | 0.09335 | none       |
| RAD54L   | 0.221  | 0.2027  | 2.5883 | 0.02775 | 0.092 | -3.84 | -1.153  | none       |
| FANCC    | 0.431  | 0.3602  | 2.5879 | 0.02777 | 0.092 | -3.84 | -0.9596 | none       |

|           |        |         |        |         |       |       |         |            |
|-----------|--------|---------|--------|---------|-------|-------|---------|------------|
| DENND3    | 0.392  | 0.3846  | 2.5879 | 0.02777 | 0.092 | -3.84 | -1.0351 | none       |
| ATP13A2   | 0.479  | 0.439   | 2.5876 | 0.02778 | 0.092 | -3.84 | -1.1615 | none       |
| HHLA3     | 0.276  | 0.1925  | 2.5862 | 0.02785 | 0.092 | -3.84 | -0.2498 | none       |
| N4BP2L2   | 0.382  | 0.3022  | 2.5861 | 0.02785 | 0.092 | -3.84 | -0.9324 | none       |
| NKX3-1    | -0.255 | -0.2083 | -2.586 | 0.02786 | 0.092 | -3.84 | 1.26928 | none       |
| XKR5      | 0.275  | 0.1856  | 2.5861 | 0.02786 | 0.092 | -3.84 | -1.4168 | none       |
| LAIR1     | 0.567  | 0.4238  | 2.5859 | 0.02787 | 0.092 | -3.84 | -0.8893 | none       |
| RPA2      | -0.212 | -0.1981 | -2.584 | 0.02795 | 0.092 | -3.84 | 0.64551 | none       |
| ATF7IP    | 0.75   | 0.7473  | 2.584  | 0.02795 | 0.092 | -3.84 | -0.5803 | none       |
| RPS23     | -0.518 | -0.5445 | -2.584 | 0.02796 | 0.092 | -3.84 | 2.03509 | none       |
| DARS      | -0.229 | -0.2237 | -2.583 | 0.02802 | 0.092 | -3.85 | 1.79486 | none       |
| STX16-NPE | 0.398  | 0.3219  | 2.5822 | 0.02804 | 0.092 | -3.85 | -0.7118 | none       |
| UQCRC2    | 0.326  | 0.1439  | 2.5821 | 0.02804 | 0.092 | -3.85 | 0.42606 | none       |
| MGST2     | -0.471 | -0.4922 | -2.581 | 0.0281  | 0.093 | -3.85 | 1.51531 | none       |
| TUBG1     | 0.281  | 0.227   | 2.5807 | 0.02811 | 0.093 | -3.85 | -0.8609 | none       |
| MYO1E     | 0.736  | 0.7519  | 2.5804 | 0.02812 | 0.093 | -3.85 | -0.4623 | none       |
| WDR36     | 0.376  | 0.2608  | 2.5799 | 0.02815 | 0.093 | -3.85 | -0.6975 | none       |
| NUDT2     | -0.263 | -0.2468 | -2.579 | 0.02819 | 0.093 | -3.85 | 1.33753 | none       |
| COL4A3BP  | 0.506  | 0.4578  | 2.5782 | 0.02823 | 0.093 | -3.85 | -0.9199 | none       |
| TALDO1    | -0.322 | -0.2991 | -2.578 | 0.02824 | 0.093 | -3.85 | 1.85362 | none       |
| ZSCAN5B   | 0.462  | 0.3674  | 2.5775 | 0.02826 | 0.093 | -3.85 | -1.2193 | none       |
| FSD1      | 0.406  | 0.3147  | 2.5764 | 0.02831 | 0.093 | -3.86 | -0.7302 | none       |
| ATP11A    | 0.739  | 0.7908  | 2.5746 | 0.0284  | 0.093 | -3.86 | -0.7709 | none       |
| ATP6V1E1  | 0.297  | 0.2058  | 2.5746 | 0.0284  | 0.093 | -3.86 | -1.3266 | none       |
| RNASEH2A  | 0.362  | 0.2276  | 2.5744 | 0.02841 | 0.093 | -3.86 | -0.8866 | none       |
| MAN1C1    | 0.476  | 0.2976  | 2.5742 | 0.02842 | 0.093 | -3.86 | -0.8992 | none       |
| RRAGA     | -0.374 | -0.3265 | -2.574 | 0.02842 | 0.093 | -3.86 | 2.42083 | AA-related |
| BOLA3     | -0.373 | -0.3586 | -2.574 | 0.02843 | 0.093 | -3.86 | 2.18453 | AA-related |
| SLC7A9    | 0.423  | 0.3433  | 2.5738 | 0.02844 | 0.093 | -3.86 | -1.33   | none       |
| HEATR4    | 0.349  | 0.2883  | 2.5735 | 0.02845 | 0.093 | -3.86 | 0.6305  | none       |
| BCL2A1    | -0.443 | -0.3999 | -2.574 | 0.02845 | 0.093 | -3.86 | 1.69986 | none       |
| POLR3C    | 0.319  | 0.2957  | 2.5734 | 0.02846 | 0.093 | -3.86 | -0.4211 | none       |
| CUL7      | 0.344  | 0.3611  | 2.5733 | 0.02846 | 0.093 | -3.86 | 0.24596 | none       |
| ASPG      | -0.582 | -0.4866 | -2.573 | 0.02847 | 0.093 | -3.86 | 0.8402  | none       |
| ARSJ      | 0.43   | 0.3693  | 2.573  | 0.02848 | 0.093 | -3.86 | 0.11312 | none       |
| RASSF4    | 0.651  | 0.5486  | 2.573  | 0.02848 | 0.093 | -3.86 | 0.26532 | none       |
| VARS2     | 0.553  | 0.4397  | 2.572  | 0.02853 | 0.094 | -3.86 | -0.645  | none       |
| PREX2     | 0.35   | 0.2506  | 2.5714 | 0.02856 | 0.094 | -3.86 | -1.2156 | none       |
| ADAD2     | 0.331  | 0.2232  | 2.5708 | 0.02858 | 0.094 | -3.86 | -0.3357 | none       |
| PFKFB3    | 0.502  | 0.4614  | 2.5708 | 0.02859 | 0.094 | -3.86 | -0.6704 | none       |

|          |        |         |        |         |       |       |         |      |
|----------|--------|---------|--------|---------|-------|-------|---------|------|
| MRPL47   | -0.34  | -0.3164 | -2.571 | 0.02859 | 0.094 | -3.86 | 1.71732 | none |
| IKZF1    | 0.436  | 0.4338  | 2.5705 | 0.0286  | 0.094 | -3.86 | -0.5908 | none |
| KIAA1109 | 0.69   | 0.6832  | 2.5705 | 0.0286  | 0.094 | -3.86 | -0.6911 | none |
| LOX      | 0.419  | 0.2816  | 2.5702 | 0.02861 | 0.094 | -3.87 | -1.4124 | none |
| SOD1     | -0.385 | -0.3988 | -2.57  | 0.02864 | 0.094 | -3.87 | 1.91346 | none |
| CCDC66   | 0.504  | 0.3844  | 2.5696 | 0.02864 | 0.094 | -3.87 | -0.7255 | none |
| BASP1    | 0.461  | 0.4813  | 2.5689 | 0.02868 | 0.094 | -3.87 | -1.0417 | none |
| VCPKMT   | 0.494  | 0.3743  | 2.5688 | 0.02868 | 0.094 | -3.87 | -1.1097 | none |
| KAT6A    | 0.773  | 0.7331  | 2.5685 | 0.0287  | 0.094 | -3.87 | -0.9785 | none |
| APC2     | 0.351  | 0.2805  | 2.5685 | 0.0287  | 0.094 | -3.87 | -1.5102 | none |
| TNRC6B   | 0.819  | 0.8356  | 2.5685 | 0.0287  | 0.094 | -3.87 | -1.057  | none |
| CRBN     | 0.317  | 0.1636  | 2.5676 | 0.02874 | 0.094 | -3.87 | -0.5772 | none |
| C3AR1    | -0.319 | -0.3373 | -2.567 | 0.02876 | 0.094 | -3.87 | 1.52741 | none |
| USP14    | 0.221  | 0.171   | 2.5672 | 0.02876 | 0.094 | -3.87 | 0.77523 | none |
| RFX8     | -0.398 | -0.3706 | -2.566 | 0.0288  | 0.094 | -3.87 | 1.18852 | none |
| UTP23    | -0.297 | -0.1926 | -2.566 | 0.02884 | 0.094 | -3.87 | 0.78682 | none |
| DNAAF5   | 0.432  | 0.4239  | 2.5654 | 0.02884 | 0.094 | -3.87 | 0.21846 | none |
| GBP3     | 0.683  | 0.6242  | 2.5647 | 0.02888 | 0.094 | -3.87 | -0.7805 | none |
| ZNF175   | 0.487  | 0.4164  | 2.5644 | 0.0289  | 0.094 | -3.87 | -0.2585 | none |
| PGAM1    | -0.286 | -0.2167 | -2.564 | 0.0289  | 0.094 | -3.87 | 1.41125 | none |
| ALDH1L2  | -0.269 | -0.2771 | -2.564 | 0.02892 | 0.094 | -3.88 | 0.53609 | none |
| TRIM11   | 0.253  | 0.1641  | 2.5633 | 0.02895 | 0.094 | -3.88 | -0.0608 | none |
| PLEKHG3  | 0.424  | 0.3967  | 2.5628 | 0.02897 | 0.095 | -3.88 | 0.01292 | none |
| TXNDC9   | -0.327 | -0.3546 | -2.561 | 0.02904 | 0.095 | -3.88 | 2.03911 | none |
| CLDN18   | 0.352  | 0.2451  | 2.5603 | 0.0291  | 0.095 | -3.88 | -1.1509 | none |
| RAB27A   | 0.339  | 0.2311  | 2.5601 | 0.0291  | 0.095 | -3.88 | -0.9039 | none |
| ZNF620   | 0.526  | 0.3786  | 2.5598 | 0.02912 | 0.095 | -3.88 | -1.0712 | none |
| FBF1     | 0.362  | 0.4099  | 2.5594 | 0.02914 | 0.095 | -3.88 | -0.6119 | none |
| HSPA2    | 0.482  | 0.4251  | 2.5589 | 0.02917 | 0.095 | -3.88 | -0.7566 | none |
| DPP4     | 0.262  | 0.173   | 2.5588 | 0.02917 | 0.095 | -3.88 | 0.54842 | none |
| MAP2K4   | 0.413  | 0.3647  | 2.5576 | 0.02923 | 0.095 | -3.89 | -0.2098 | none |
| DARS2    | 0.248  | 0.1912  | 2.5572 | 0.02925 | 0.095 | -3.89 | -0.2241 | none |
| SNX1     | 0.353  | 0.3766  | 2.5569 | 0.02926 | 0.095 | -3.89 | -1.1121 | none |
| ROCK1    | 0.906  | 0.9122  | 2.5558 | 0.02932 | 0.095 | -3.89 | -0.7971 | none |
| POMK     | 0.365  | 0.2132  | 2.5557 | 0.02932 | 0.095 | -3.89 | -0.9983 | none |
| GJA10    | 0.562  | 0.4335  | 2.5556 | 0.02933 | 0.095 | -3.89 | -1.0285 | none |
| MOSPD2   | 0.522  | 0.4234  | 2.5555 | 0.02933 | 0.095 | -3.89 | -0.7619 | none |
| TMEM19   | 0.307  | 0.1285  | 2.5555 | 0.02934 | 0.095 | -3.89 | -0.6748 | none |
| POLH     | 0.464  | 0.3851  | 2.5544 | 0.02939 | 0.096 | -3.89 | -0.5582 | none |
| ZNF585B  | 1.043  | 0.821   | 2.5538 | 0.02942 | 0.096 | -3.89 | 0.28983 | none |

|          |        |         |        |         |       |       |         |            |
|----------|--------|---------|--------|---------|-------|-------|---------|------------|
| DSTN     | -0.316 | -0.3526 | -2.554 | 0.02943 | 0.096 | -3.89 | 1.78207 | none       |
| PTCHD4   | 0.23   | 0.158   | 2.5532 | 0.02945 | 0.096 | -3.89 | -0.2415 | none       |
| C12ORF71 | -0.173 | -0.1304 | -2.553 | 0.02948 | 0.096 | -3.89 | 0.91931 | none       |
| ELP2     | 0.375  | 0.2549  | 2.5518 | 0.02952 | 0.096 | -3.9  | -0.6293 | none       |
| PCSK2    | 0.234  | 0.1903  | 2.5514 | 0.02954 | 0.096 | -3.9  | 0.80593 | none       |
| TAF9     | -0.263 | -0.2898 | -2.551 | 0.02954 | 0.096 | -3.9  | 1.16867 | none       |
| PTGES3   | -0.327 | -0.3299 | -2.551 | 0.02954 | 0.096 | -3.9  | 1.72286 | none       |
| NBEAL1   | 0.359  | 0.2889  | 2.5512 | 0.02955 | 0.096 | -3.9  | -0.5583 | none       |
| TIRAP    | 0.383  | 0.3136  | 2.5511 | 0.02955 | 0.096 | -3.9  | -0.3955 | none       |
| FBXW11   | 0.335  | 0.2353  | 2.5506 | 0.02958 | 0.096 | -3.9  | 0.07508 | none       |
| UTP20    | 0.77   | 0.7718  | 2.5503 | 0.02959 | 0.096 | -3.9  | -0.4994 | none       |
| ZDHHC24  | 0.341  | 0.2057  | 2.55   | 0.02961 | 0.096 | -3.9  | -0.9816 | none       |
| EIF3H    | -0.259 | -0.2322 | -2.55  | 0.02962 | 0.096 | -3.9  | 2.15744 | AA-related |
| ANKRD13C | 0.375  | 0.3377  | 2.5497 | 0.02962 | 0.096 | -3.9  | -1.0911 | none       |
| ASMT     | 0.407  | 0.3454  | 2.5497 | 0.02962 | 0.096 | -3.9  | -0.5472 | none       |
| PSMB8    | -0.495 | -0.4832 | -2.55  | 0.02963 | 0.096 | -3.9  | 1.38747 | none       |
| EVA1B    | -0.337 | -0.2933 | -2.549 | 0.02964 | 0.096 | -3.9  | 1.58418 | none       |
| EP300    | 0.807  | 0.824   | 2.5487 | 0.02967 | 0.096 | -3.9  | -0.7677 | none       |
| SNCG     | 0.372  | 0.3003  | 2.5487 | 0.02967 | 0.096 | -3.9  | -0.4396 | none       |
| TSPOAP1  | -0.54  | -0.4332 | -2.549 | 0.02968 | 0.096 | -3.9  | 1.03788 | none       |
| EVL      | 0.454  | 0.4372  | 2.5469 | 0.02976 | 0.096 | -3.9  | -0.6539 | none       |
| GTF3C3   | 0.303  | 0.1867  | 2.5468 | 0.02977 | 0.096 | -3.9  | -0.0279 | none       |
| NDUFA1   | -0.432 | -0.4686 | -2.546 | 0.0298  | 0.096 | -3.9  | 1.3283  | none       |
| PFN4     | 0.341  | 0.3213  | 2.5461 | 0.0298  | 0.096 | -3.9  | -0.6041 | none       |
| CARMIL2  | 0.451  | 0.5282  | 2.546  | 0.02981 | 0.096 | -3.9  | -0.8129 | none       |
| ZNF74    | 0.382  | 0.3359  | 2.5453 | 0.02984 | 0.097 | -3.91 | 0.36908 | none       |
| IL17RD   | 0.396  | 0.2454  | 2.5453 | 0.02984 | 0.097 | -3.91 | -0.8854 | none       |
| C12ORF10 | -0.313 | -0.2677 | -2.545 | 0.02986 | 0.097 | -3.91 | 1.76935 | none       |
| CD2BP2   | -0.389 | -0.3013 | -2.545 | 0.02987 | 0.097 | -3.91 | 2.43993 | AA-related |
| ZDHHC13  | 0.314  | 0.1398  | 2.5433 | 0.02994 | 0.097 | -3.91 | -0.628  | none       |
| IRF2BP1  | -0.245 | -0.1415 | -2.543 | 0.02996 | 0.097 | -3.91 | 1.95389 | none       |
| SUGP2    | 0.537  | 0.5365  | 2.5428 | 0.02997 | 0.097 | -3.91 | -0.5901 | none       |
| EXOC5    | 0.364  | 0.3099  | 2.5424 | 0.02999 | 0.097 | -3.91 | 0.46717 | none       |
| RHEBL1   | -0.392 | -0.3239 | -2.542 | 0.03    | 0.097 | -3.91 | 0.83187 | none       |
| IPO11    | 0.449  | 0.3157  | 2.542  | 0.03001 | 0.097 | -3.91 | -0.3072 | none       |
| SRPX2    | 0.242  | 0.154   | 2.5413 | 0.03005 | 0.097 | -3.91 | 0.21387 | none       |
| PRR3     | 0.763  | 0.5485  | 2.5409 | 0.03007 | 0.097 | -3.91 | -1.0769 | none       |
| PAQR5    | 0.314  | 0.2441  | 2.5403 | 0.0301  | 0.097 | -3.91 | -0.9355 | none       |
| FPGT     | -0.299 | -0.1868 | -2.54  | 0.0301  | 0.097 | -3.91 | 0.41372 | none       |
| VWA3B    | 0.427  | 0.3639  | 2.5399 | 0.03012 | 0.097 | -3.91 | 0.00455 | none       |

|          |        |         |        |         |       |       |         |            |
|----------|--------|---------|--------|---------|-------|-------|---------|------------|
| CIR1     | 0.818  | 0.8095  | 2.5386 | 0.03018 | 0.097 | -3.92 | -1.0195 | none       |
| COX10    | 0.232  | 0.1803  | 2.5382 | 0.0302  | 0.097 | -3.92 | -0.8958 | none       |
| CREB1    | 0.425  | 0.3382  | 2.5382 | 0.0302  | 0.097 | -3.92 | 0.15401 | none       |
| URGCP-MI | -0.44  | -0.4849 | -2.538 | 0.03021 | 0.097 | -3.92 | 1.37922 | none       |
| CEP72    | 0.343  | 0.3694  | 2.5378 | 0.03023 | 0.097 | -3.92 | -0.7216 | none       |
| CHADL    | -0.27  | -0.1981 | -2.537 | 0.03024 | 0.097 | -3.92 | 0.05132 | none       |
| NCOA1    | 0.809  | 0.739   | 2.5352 | 0.03036 | 0.098 | -3.92 | -0.4944 | none       |
| CTSC     | -0.319 | -0.3112 | -2.535 | 0.03037 | 0.098 | -3.92 | 2.37256 | AA-related |
| FAM219A  | 0.509  | 0.4844  | 2.5346 | 0.03039 | 0.098 | -3.92 | -0.2664 | none       |
| B4GALT4  | 0.454  | 0.3077  | 2.5346 | 0.03039 | 0.098 | -3.92 | 0.38038 | none       |
| LGALS1   | -0.58  | -0.547  | -2.535 | 0.03039 | 0.098 | -3.92 | 2.05338 | none       |
| ANKHD1   | 0.483  | 0.4635  | 2.5344 | 0.0304  | 0.098 | -3.92 | -0.6644 | none       |
| AP5Z1    | 0.378  | 0.2998  | 2.5343 | 0.0304  | 0.098 | -3.92 | -1.3195 | none       |
| WAPL     | 0.734  | 0.6979  | 2.5339 | 0.03043 | 0.098 | -3.92 | -0.4738 | none       |
| ANGEL2   | 0.258  | 0.1668  | 2.5337 | 0.03043 | 0.098 | -3.92 | -0.763  | none       |
| SMIM11B  | 0.388  | 0.2262  | 2.5336 | 0.03044 | 0.098 | -3.92 | -0.5168 | none       |
| TMEM132  | 0.431  | 0.3581  | 2.5331 | 0.03046 | 0.098 | -3.93 | -1.2923 | none       |
| ZNF224   | 0.418  | 0.3505  | 2.5327 | 0.03048 | 0.098 | -3.93 | -0.4269 | none       |
| PHYH     | -0.3   | -0.2703 | -2.533 | 0.03049 | 0.098 | -3.93 | 1.03309 | none       |
| KLKB1    | 0.211  | 0.1289  | 2.5324 | 0.0305  | 0.098 | -3.93 | -0.3316 | none       |
| FCRL3    | 0.579  | 0.4602  | 2.5311 | 0.03057 | 0.098 | -3.93 | -1.1481 | none       |
| PAX6     | 0.336  | 0.2811  | 2.5304 | 0.03061 | 0.098 | -3.93 | -0.1762 | none       |
| SHISA7   | 0.211  | 0.1599  | 2.5304 | 0.03061 | 0.098 | -3.93 | -0.894  | none       |
| SLC5A10  | 0.307  | 0.2381  | 2.5298 | 0.03064 | 0.098 | -3.93 | -1.0764 | none       |
| CD53     | -0.347 | -0.3942 | -2.53  | 0.03064 | 0.098 | -3.93 | 1.92477 | none       |
| SIAH2    | -0.234 | -0.2051 | -2.529 | 0.03067 | 0.098 | -3.93 | 0.19383 | none       |
| ASH2L    | 0.328  | 0.2505  | 2.5289 | 0.03068 | 0.098 | -3.93 | -0.0646 | none       |
| NEMF     | 0.612  | 0.5609  | 2.5277 | 0.03075 | 0.099 | -3.93 | -1.0898 | none       |
| KIF1C    | 0.711  | 0.6954  | 2.5276 | 0.03075 | 0.099 | -3.93 | -0.8976 | none       |
| FOXO3    | 0.457  | 0.4481  | 2.5276 | 0.03075 | 0.099 | -3.93 | -0.8089 | none       |
| GEMIN2   | 0.374  | 0.2016  | 2.5275 | 0.03076 | 0.099 | -3.93 | -1.0757 | none       |
| PRDM14   | 0.334  | 0.2334  | 2.5271 | 0.03078 | 0.099 | -3.94 | -1.4868 | none       |
| AC091180 | 0.903  | 0.7048  | 2.5265 | 0.03081 | 0.099 | -3.94 | -1.3961 | none       |
| PCDHB9   | 0.227  | 0.1717  | 2.5262 | 0.03082 | 0.099 | -3.94 | -0.8845 | none       |
| KDM3B    | 0.738  | 0.7224  | 2.526  | 0.03083 | 0.099 | -3.94 | -0.663  | none       |
| PRUNE2   | 0.299  | 0.2591  | 2.5258 | 0.03084 | 0.099 | -3.94 | 0.10199 | none       |
| C12ORF40 | 0.275  | 0.2149  | 2.5239 | 0.03095 | 0.099 | -3.94 | -1.0417 | none       |
| PKP4     | 0.685  | 0.7453  | 2.5236 | 0.03096 | 0.099 | -3.94 | -0.7735 | none       |
| MYO6     | 0.227  | 0.1665  | 2.5235 | 0.03096 | 0.099 | -3.94 | 0.05325 | none       |
| PLP1     | 0.223  | 0.2292  | 2.5231 | 0.03098 | 0.099 | -3.94 | -0.576  | none       |

|          |        |         |        |         |       |       |         |            |
|----------|--------|---------|--------|---------|-------|-------|---------|------------|
| RIDA     | -0.465 | -0.3886 | -2.523 | 0.03099 | 0.099 | -3.94 | 1.15701 | none       |
| NGDN     | -0.3   | -0.2777 | -2.523 | 0.03099 | 0.099 | -3.94 | 1.15571 | none       |
| NPIPA2   | 0.504  | 0.3594  | 2.5226 | 0.03101 | 0.099 | -3.94 | -0.4995 | none       |
| MTMR2    | 0.231  | 0.1729  | 2.5223 | 0.03103 | 0.099 | -3.94 | 0.15249 | none       |
| RNF157   | 0.391  | 0.2577  | 2.5222 | 0.03103 | 0.099 | -3.94 | -1.1836 | none       |
| PDZD11   | -0.393 | -0.4188 | -2.522 | 0.03105 | 0.099 | -3.94 | 0.94119 | none       |
| NDUFB4   | -0.339 | -0.3305 | -2.522 | 0.03106 | 0.099 | -3.94 | 2.00568 | none       |
| TSPAN3   | -0.328 | -0.2616 | -2.522 | 0.03107 | 0.099 | -3.94 | 1.82352 | none       |
| LDB1     | 0.601  | 0.5357  | 2.5215 | 0.03107 | 0.099 | -3.94 | -1.1908 | none       |
| CDC26    | -0.378 | -0.3918 | -2.521 | 0.03107 | 0.099 | -3.94 | 1.35368 | none       |
| BTLA     | -0.596 | -0.5324 | -2.521 | 0.0311  | 0.099 | -3.95 | 0.71874 | none       |
| PSME1    | -0.256 | -0.2688 | -2.521 | 0.03111 | 0.099 | -3.95 | 2.31974 | AA-related |
| AP2B1    | 0.557  | 0.4669  | 2.5206 | 0.03112 | 0.099 | -3.95 | -0.6432 | none       |
| KLRB1    | -0.484 | -0.5152 | -2.519 | 0.03118 | 0.1   | -3.95 | 1.52199 | none       |
| GLDN     | 0.317  | 0.2585  | 2.5194 | 0.03118 | 0.1   | -3.95 | -0.9673 | none       |
| FUT9     | 0.198  | 0.1442  | 2.519  | 0.0312  | 0.1   | -3.95 | -1.442  | none       |
| PAK6     | 1.04   | 0.7937  | 2.5188 | 0.03121 | 0.1   | -3.95 | 0.24391 | none       |
| FMNL3    | 0.468  | 0.5322  | 2.5187 | 0.03122 | 0.1   | -3.95 | -0.961  | none       |
| TANC1    | 0.194  | 0.1746  | 2.5181 | 0.03125 | 0.1   | -3.95 | -1.217  | none       |
| PHF1     | 0.69   | 0.5395  | 2.5174 | 0.03129 | 0.1   | -3.95 | -0.6797 | none       |
| NPEPPS   | 0.327  | 0.288   | 2.5173 | 0.03129 | 0.1   | -3.95 | -0.0608 | none       |
| GTF2H2   | 0.481  | 0.3167  | 2.517  | 0.0313  | 0.1   | -3.95 | -0.7837 | none       |
| PRSS23   | 0.491  | 0.391   | 2.5169 | 0.03131 | 0.1   | -3.95 | -0.1313 | none       |
| RPA1     | 0.256  | 0.1921  | 2.5166 | 0.03133 | 0.1   | -3.95 | 0.07399 | none       |
| ITGA6    | 0.547  | 0.5243  | 2.5165 | 0.03133 | 0.1   | -3.95 | 0.04528 | none       |
| COL10A1  | -0.248 | -0.1697 | -2.516 | 0.03134 | 0.1   | -3.95 | 0.4618  | none       |
| NOC2L    | 0.472  | 0.469   | 2.5163 | 0.03134 | 0.1   | -3.95 | -0.6849 | none       |
| UHRF1BP1 | 0.491  | 0.5099  | 2.5163 | 0.03134 | 0.1   | -3.95 | -0.5757 | none       |
| CHCHD1   | -0.344 | -0.3344 | -2.516 | 0.03135 | 0.1   | -3.95 | 0.79828 | none       |
| RWDD2B   | 0.388  | 0.3211  | 2.5162 | 0.03135 | 0.1   | -3.95 | -0.6472 | none       |
| B3GALT5  | 0.265  | 0.2074  | 2.5161 | 0.03136 | 0.1   | -3.95 | -1.0931 | none       |
| BCAR3    | 0.548  | 0.4001  | 2.5159 | 0.03136 | 0.1   | -3.95 | -1.3289 | none       |
| COX4I1   | -0.416 | -0.396  | -2.516 | 0.03138 | 0.1   | -3.95 | 1.82711 | none       |
| MBNL1    | 0.473  | 0.4179  | 2.5153 | 0.0314  | 0.1   | -3.95 | -0.3282 | none       |
| DNAJC7   | 0.588  | 0.5387  | 2.5152 | 0.0314  | 0.1   | -3.95 | -0.8439 | none       |
| WRAP53   | -0.255 | -0.1728 | -2.515 | 0.03142 | 0.1   | -3.96 | 1.27829 | none       |
| ACSL1    | 0.346  | 0.3332  | 2.5146 | 0.03143 | 0.1   | -3.96 | -0.4801 | none       |
| FKBP3    | 0.242  | 0.1618  | 2.5145 | 0.03144 | 0.1   | -3.96 | -0.553  | none       |
| RREB1    | 0.531  | 0.5788  | 2.5142 | 0.03145 | 0.1   | -3.96 | -0.6012 | none       |
| MED6     | 0.201  | 0.0697  | 2.5141 | 0.03146 | 0.1   | -3.96 | -0.4568 | none       |



|         |        |         |        |         |       |       |         |            |
|---------|--------|---------|--------|---------|-------|-------|---------|------------|
| BCAP31  | -0.319 | -0.301  | -2.514 | 0.03146 | 0.1   | -3.96 | 1.9761  | none       |
| ADD2    | 0.275  | 0.2034  | 2.5129 | 0.03153 | 0.1   | -3.96 | -0.3138 | none       |
| PDE3B   | 0.472  | 0.3782  | 2.5128 | 0.03153 | 0.1   | -3.96 | 0.08766 | none       |
| ENKUR   | 0.216  | 0.2195  | 2.5123 | 0.03156 | 0.1   | -3.96 | 0.48374 | none       |
| SGSH    | 0.437  | 0.4395  | 2.5123 | 0.03156 | 0.1   | -3.96 | -0.5804 | none       |
| PBDC1   | -0.229 | -0.1781 | -2.512 | 0.03159 | 0.1   | -3.96 | 0.99727 | none       |
| MYDGF   | -0.241 | -0.2088 | -2.511 | 0.03162 | 0.1   | -3.96 | 2.33201 | AA-related |
| ODF2    | 0.759  | 0.7363  | 2.5099 | 0.03169 | 0.101 | -3.96 | -0.6314 | none       |
| HARS2   | 0.196  | 0.1454  | 2.5097 | 0.0317  | 0.101 | -3.96 | -0.7157 | none       |
| MAN2B2  | 0.644  | 0.5788  | 2.5096 | 0.0317  | 0.101 | -3.96 | -0.884  | none       |
| SRPRB   | -0.354 | -0.3346 | -2.509 | 0.03172 | 0.101 | -3.96 | 2.40855 | AA-related |
| AIFM2   | 0.294  | 0.2686  | 2.5086 | 0.03175 | 0.101 | -3.97 | -1.3284 | none       |
| PILRB   | 0.384  | 0.3878  | 2.5085 | 0.03176 | 0.101 | -3.97 | -0.4626 | none       |
| TMEM25  | 0.369  | 0.2668  | 2.5072 | 0.03183 | 0.101 | -3.97 | -0.3625 | none       |
| ANO7    | 0.424  | 0.3498  | 2.5069 | 0.03184 | 0.101 | -3.97 | -0.843  | none       |
| COL17A1 | 0.28   | 0.2472  | 2.5068 | 0.03185 | 0.101 | -3.97 | -0.6185 | none       |
| CLCN7   | 0.447  | 0.3997  | 2.5067 | 0.03186 | 0.101 | -3.97 | -0.4739 | none       |
| ACPP    | 0.386  | 0.3638  | 2.5065 | 0.03187 | 0.101 | -3.97 | -0.9566 | none       |
| PCNA    | -0.357 | -0.3411 | -2.506 | 0.03187 | 0.101 | -3.97 | 1.73821 | none       |
| RPL5    | -0.218 | -0.2244 | -2.506 | 0.03188 | 0.101 | -3.97 | 1.42014 | none       |
| USP9X   | 0.645  | 0.6512  | 2.5052 | 0.03194 | 0.101 | -3.97 | -0.4441 | none       |
| MYCT1   | 0.343  | 0.2221  | 2.5047 | 0.03196 | 0.101 | -3.97 | 0.27373 | none       |
| FAM193A | 0.584  | 0.6366  | 2.5041 | 0.032   | 0.101 | -3.97 | -0.3649 | none       |
| NUDT3   | 0.396  | 0.3579  | 2.5032 | 0.03204 | 0.101 | -3.97 | -0.8046 | none       |
| PTPRF   | 0.603  | 0.4892  | 2.5031 | 0.03205 | 0.101 | -3.97 | -1.1893 | none       |
| PCNT    | 0.554  | 0.6727  | 2.5031 | 0.03205 | 0.101 | -3.97 | -0.8062 | none       |
| DCUN1D5 | -0.328 | -0.2886 | -2.503 | 0.03206 | 0.101 | -3.97 | 1.6774  | none       |
| CTSA    | 0.346  | 0.3272  | 2.5028 | 0.03207 | 0.101 | -3.98 | -0.5418 | none       |
| ZNF771  | 0.313  | 0.1916  | 2.5027 | 0.03207 | 0.101 | -3.98 | -0.998  | none       |
| PRKCH   | 0.355  | 0.3334  | 2.5026 | 0.03208 | 0.101 | -3.98 | 0.22653 | none       |
| RAB26   | 0.331  | 0.2287  | 2.5024 | 0.03209 | 0.101 | -3.98 | -1.1851 | none       |
| ATIC    | -0.197 | -0.1629 | -2.502 | 0.03213 | 0.101 | -3.98 | 2.28433 | AA-related |
| BARD1   | 0.223  | 0.1175  | 2.5014 | 0.03214 | 0.101 | -3.98 | 0.08563 | none       |
| MEIG1   | -0.323 | -0.3122 | -2.501 | 0.03214 | 0.101 | -3.98 | 1.7452  | none       |
| BRK1    | -0.478 | -0.5302 | -2.501 | 0.03218 | 0.102 | -3.98 | 1.82862 | none       |
| SMAD5   | 0.411  | 0.2502  | 2.5002 | 0.03221 | 0.102 | -3.98 | -0.6763 | none       |
| ZNF451  | 0.531  | 0.3837  | 2.5001 | 0.03221 | 0.102 | -3.98 | -1.05   | none       |
| TNIK    | 0.353  | 0.2949  | 2.4996 | 0.03224 | 0.102 | -3.98 | -0.9575 | none       |
| MNS1    | 0.546  | 0.4271  | 2.4996 | 0.03224 | 0.102 | -3.98 | -0.9688 | none       |
| NLRP1   | 0.432  | 0.4443  | 2.4995 | 0.03224 | 0.102 | -3.98 | -0.8405 | none       |

|         |        |         |        |         |       |       |         |            |
|---------|--------|---------|--------|---------|-------|-------|---------|------------|
| PCDHB13 | 0.227  | 0.1923  | 2.4988 | 0.03228 | 0.102 | -3.98 | -1.1629 | none       |
| NME1    | -0.308 | -0.2809 | -2.498 | 0.03232 | 0.102 | -3.98 | 1.59091 | none       |
| DNAH5   | 0.711  | 0.5695  | 2.498  | 0.03232 | 0.102 | -3.98 | -0.7344 | none       |
| LY86    | -0.289 | -0.2701 | -2.498 | 0.03233 | 0.102 | -3.98 | 1.57342 | none       |
| PSMB1   | -0.377 | -0.3621 | -2.498 | 0.03233 | 0.102 | -3.98 | 1.13806 | none       |
| SMURF1  | 0.365  | 0.3737  | 2.4975 | 0.03235 | 0.102 | -3.98 | -0.3891 | none       |
| MSTO1   | 0.348  | 0.4141  | 2.4966 | 0.0324  | 0.102 | -3.99 | 0.15693 | none       |
| PTPA    | 0.398  | 0.2978  | 2.4965 | 0.03241 | 0.102 | -3.99 | -1.1342 | none       |
| PARP12  | 0.28   | 0.221   | 2.4965 | 0.03241 | 0.102 | -3.99 | -0.6155 | none       |
| PDE10A  | 0.446  | 0.3699  | 2.4965 | 0.03241 | 0.102 | -3.99 | 0.44509 | none       |
| ERI3    | -0.398 | -0.3421 | -2.496 | 0.03244 | 0.102 | -3.99 | 1.01087 | none       |
| UBXN6   | -0.264 | -0.1925 | -2.495 | 0.03247 | 0.102 | -3.99 | 1.17203 | none       |
| QTRT1   | 0.33   | 0.2732  | 2.4953 | 0.03247 | 0.102 | -3.99 | -0.5251 | none       |
| NAP1L2  | -0.232 | -0.1787 | -2.495 | 0.0325  | 0.102 | -3.99 | 1.61277 | none       |
| LPXN    | -0.324 | -0.3454 | -2.495 | 0.03251 | 0.102 | -3.99 | 2.00174 | none       |
| ACOX2   | -0.229 | -0.2287 | -2.494 | 0.03252 | 0.102 | -3.99 | 1.38067 | none       |
| PPIL1   | -0.37  | -0.3579 | -2.494 | 0.03253 | 0.102 | -3.99 | 2.16067 | AA-related |
| SMG7    | 0.639  | 0.6216  | 2.494  | 0.03255 | 0.102 | -3.99 | -0.909  | none       |
| NDOR1   | 0.319  | 0.299   | 2.4939 | 0.03255 | 0.102 | -3.99 | -0.4028 | none       |
| ZNF676  | 0.488  | 0.3     | 2.4939 | 0.03255 | 0.102 | -3.99 | -1.0457 | none       |
| LRFN1   | 0.257  | 0.2335  | 2.4939 | 0.03255 | 0.102 | -3.99 | -1.0738 | none       |
| CST7    | -0.267 | -0.2465 | -2.494 | 0.03256 | 0.102 | -3.99 | 0.47687 | none       |
| TMEM243 | 0.372  | 0.2342  | 2.4937 | 0.03256 | 0.102 | -3.99 | -0.2659 | none       |
| LCOR    | 0.57   | 0.4994  | 2.4935 | 0.03257 | 0.102 | -3.99 | -0.8108 | none       |
| ZNF630  | 0.367  | 0.3074  | 2.4935 | 0.03257 | 0.102 | -3.99 | -0.7089 | none       |
| TTC28   | 0.532  | 0.4133  | 2.4935 | 0.03258 | 0.102 | -3.99 | -0.8169 | none       |
| MED1    | 0.654  | 0.6667  | 2.4934 | 0.03258 | 0.102 | -3.99 | -0.4398 | none       |
| ERCC1   | 0.344  | 0.2311  | 2.493  | 0.0326  | 0.102 | -3.99 | -1.2972 | none       |
| TRIM14  | 0.558  | 0.5433  | 2.4919 | 0.03266 | 0.102 | -3.99 | 0.45807 | none       |
| TMEM184 | 0.288  | 0.1875  | 2.4919 | 0.03266 | 0.102 | -3.99 | 0.83694 | none       |
| ZNF691  | 0.287  | 0.203   | 2.4917 | 0.03267 | 0.102 | -3.99 | -0.4259 | none       |
| FAM210A | 0.243  | 0.172   | 2.4916 | 0.03268 | 0.102 | -3.99 | -0.9435 | none       |
| NRSN2   | -0.336 | -0.2341 | -2.491 | 0.03273 | 0.103 | -3.99 | 1.61892 | none       |
| PSMA4   | -0.253 | -0.2361 | -2.49  | 0.03279 | 0.103 | -4    | 2.04472 | none       |
| TCF12   | 0.555  | 0.5722  | 2.4891 | 0.03282 | 0.103 | -4    | -0.2823 | none       |
| ANGPT4  | 0.253  | 0.1869  | 2.4889 | 0.03283 | 0.103 | -4    | -1.3277 | none       |
| MAP2K3  | -0.17  | -0.0763 | -2.489 | 0.03284 | 0.103 | -4    | 1.3559  | none       |
| NXF1    | 0.453  | 0.3908  | 2.4886 | 0.03284 | 0.103 | -4    | -0.9804 | none       |
| RNF31   | 0.458  | 0.4021  | 2.4885 | 0.03285 | 0.103 | -4    | -1.181  | none       |
| AP2A1   | 0.448  | 0.4269  | 2.4883 | 0.03286 | 0.103 | -4    | -0.886  | none       |

|          |        |         |        |         |       |       |         |            |
|----------|--------|---------|--------|---------|-------|-------|---------|------------|
| CKS2     | -0.535 | -0.5382 | -2.488 | 0.03287 | 0.103 | -4    | 2.1611  | AA-related |
| SCFD2    | 0.248  | 0.1949  | 2.4878 | 0.03289 | 0.103 | -4    | -1.0215 | none       |
| POLL     | 0.381  | 0.3313  | 2.4876 | 0.0329  | 0.103 | -4    | -0.7781 | none       |
| NUP214   | 0.613  | 0.6512  | 2.4875 | 0.03291 | 0.103 | -4    | -0.8178 | none       |
| PCYT1A   | 0.229  | 0.154   | 2.487  | 0.03293 | 0.103 | -4    | -0.1856 | none       |
| KCNK2    | 0.344  | 0.2968  | 2.4863 | 0.03297 | 0.103 | -4    | -0.2439 | none       |
| EDRF1    | 0.517  | 0.5202  | 2.4862 | 0.03298 | 0.103 | -4    | -1.1184 | none       |
| KCNG1    | 0.514  | 0.4225  | 2.486  | 0.03299 | 0.103 | -4    | -0.442  | none       |
| SLC17A7  | 0.312  | 0.2424  | 2.4857 | 0.03301 | 0.103 | -4    | -1.0039 | none       |
| N4BP2    | 0.652  | 0.6415  | 2.4855 | 0.03302 | 0.103 | -4    | -0.5654 | none       |
| ACOT4    | -0.412 | -0.345  | -2.485 | 0.03303 | 0.103 | -4    | 1.63801 | none       |
| PHF13    | -0.291 | -0.2075 | -2.485 | 0.03306 | 0.103 | -4    | 2.17665 | AA-related |
| MAATS1   | 0.422  | 0.2974  | 2.4845 | 0.03307 | 0.103 | -4    | -0.4928 | none       |
| ATF2     | 0.202  | 0.1096  | 2.4844 | 0.03308 | 0.103 | -4    | -0.8348 | none       |
| TM4SF20  | 0.208  | 0.1234  | 2.4838 | 0.03311 | 0.103 | -4.01 | -0.9428 | none       |
| SGO1     | 0.442  | 0.3549  | 2.4835 | 0.03313 | 0.103 | -4.01 | -1.1255 | none       |
| RELA     | 0.345  | 0.3203  | 2.483  | 0.03316 | 0.103 | -4.01 | -1.0645 | none       |
| TSC1     | 0.491  | 0.4439  | 2.4828 | 0.03317 | 0.103 | -4.01 | -1.3052 | none       |
| USB1     | 0.277  | 0.2352  | 2.4818 | 0.03322 | 0.104 | -4.01 | 0.37479 | none       |
| PSMB5    | -0.344 | -0.3248 | -2.482 | 0.03323 | 0.104 | -4.01 | 1.94743 | none       |
| HSFY1    | 0.481  | 0.3498  | 2.4809 | 0.03327 | 0.104 | -4.01 | -0.8321 | none       |
| AGBL1    | 0.194  | 0.1441  | 2.4803 | 0.03331 | 0.104 | -4.01 | -1.3755 | none       |
| FOSB     | 0.269  | 0.2077  | 2.4803 | 0.03331 | 0.104 | -4.01 | -0.2894 | none       |
| TTC25    | 0.546  | 0.4357  | 2.48   | 0.03333 | 0.104 | -4.01 | -0.2875 | none       |
| SNTB2    | 0.42   | 0.3658  | 2.4798 | 0.03334 | 0.104 | -4.01 | -1.0633 | none       |
| PPP4R3B  | 0.434  | 0.4134  | 2.4796 | 0.03335 | 0.104 | -4.01 | -0.2384 | none       |
| ASB6     | 0.319  | 0.2734  | 2.4795 | 0.03335 | 0.104 | -4.01 | -0.6927 | none       |
| PLIN3    | 0.324  | 0.2546  | 2.4791 | 0.03337 | 0.104 | -4.01 | -0.9322 | none       |
| CDKL1    | 0.52   | 0.4083  | 2.4791 | 0.03338 | 0.104 | -4.01 | -0.9785 | none       |
| NCKIPSD  | 0.477  | 0.4615  | 2.4789 | 0.03339 | 0.104 | -4.01 | 0.04342 | none       |
| RECK     | 0.364  | 0.2863  | 2.4788 | 0.03339 | 0.104 | -4.01 | -1.169  | none       |
| DCAF11   | 0.285  | 0.2241  | 2.4778 | 0.03345 | 0.104 | -4.02 | -0.2859 | none       |
| UBR1     | 0.488  | 0.4222  | 2.4774 | 0.03347 | 0.104 | -4.02 | -1.1804 | none       |
| ERP44    | -0.268 | -0.2735 | -2.477 | 0.03347 | 0.104 | -4.02 | 2.07252 | none       |
| YARS     | 0.357  | 0.3381  | 2.4772 | 0.03348 | 0.104 | -4.02 | -0.2848 | none       |
| SDHB     | -0.274 | -0.2566 | -2.477 | 0.03352 | 0.104 | -4.02 | 1.97486 | none       |
| PCGF3    | 0.209  | 0.144   | 2.4759 | 0.03356 | 0.104 | -4.02 | -0.6109 | none       |
| HLA-DQB2 | 0.262  | 0.1916  | 2.4749 | 0.03362 | 0.104 | -4.02 | -0.2372 | none       |
| OSBP2    | 0.784  | 0.5418  | 2.4747 | 0.03363 | 0.105 | -4.02 | -1.0683 | none       |
| PLS3     | 0.299  | 0.2515  | 2.4742 | 0.03365 | 0.105 | -4.02 | -0.3266 | none       |

|          |        |         |        |         |       |       |         |            |
|----------|--------|---------|--------|---------|-------|-------|---------|------------|
| ST3GAL5  | 0.248  | 0.1668  | 2.4735 | 0.03369 | 0.105 | -4.02 | -1.0023 | none       |
| SPSB2    | -0.21  | -0.173  | -2.473 | 0.0337  | 0.105 | -4.02 | 0.69852 | none       |
| B3GAT3   | 0.399  | 0.3319  | 2.4734 | 0.0337  | 0.105 | -4.02 | -1.059  | none       |
| RHOT2    | 0.246  | 0.2392  | 2.4733 | 0.0337  | 0.105 | -4.02 | 0.08796 | none       |
| MRPS35   | -0.2   | -0.1814 | -2.473 | 0.03372 | 0.105 | -4.02 | 2.12974 | AA-related |
| FAN1     | 0.897  | 0.776   | 2.4727 | 0.03374 | 0.105 | -4.02 | -0.1456 | none       |
| CD3EAP   | 0.734  | 0.7858  | 2.4725 | 0.03375 | 0.105 | -4.02 | -1.0898 | none       |
| OSGIN1   | 0.315  | 0.2777  | 2.47   | 0.03389 | 0.105 | -4.03 | -0.0855 | none       |
| YY1AP1   | 0.528  | 0.5052  | 2.4696 | 0.03392 | 0.105 | -4.03 | -0.4684 | none       |
| CACNB1   | 0.312  | 0.3547  | 2.4694 | 0.03393 | 0.105 | -4.03 | 0.30229 | none       |
| RALA     | -0.29  | -0.2445 | -2.469 | 0.03393 | 0.105 | -4.03 | 2.35644 | AA-related |
| CES3     | 0.272  | 0.2197  | 2.4693 | 0.03393 | 0.105 | -4.03 | -0.4562 | none       |
| SERPINA5 | 0.483  | 0.3642  | 2.4691 | 0.03394 | 0.105 | -4.03 | -0.7586 | none       |
| AADAT    | 0.245  | 0.1937  | 2.469  | 0.03395 | 0.105 | -4.03 | -0.9956 | none       |
| TSPAN17  | -0.274 | -0.2458 | -2.469 | 0.03397 | 0.105 | -4.03 | 2.36746 | AA-related |
| SMIM7    | 0.347  | 0.1831  | 2.4685 | 0.03398 | 0.105 | -4.03 | -0.4747 | none       |
| DMTF1    | 0.43   | 0.3356  | 2.4683 | 0.03399 | 0.105 | -4.03 | -0.5433 | none       |
| PHTF1    | 0.517  | 0.3195  | 2.4682 | 0.034   | 0.105 | -4.03 | -0.8647 | none       |
| SCAMP5   | 0.518  | 0.3159  | 2.468  | 0.03401 | 0.105 | -4.03 | -0.7399 | none       |
| NDUFB6   | -0.461 | -0.4699 | -2.467 | 0.03405 | 0.105 | -4.03 | 1.24363 | none       |
| GHRL     | 0.751  | 0.7184  | 2.4671 | 0.03406 | 0.105 | -4.03 | 0.2648  | none       |
| CHD4     | 0.954  | 0.9637  | 2.4663 | 0.0341  | 0.106 | -4.03 | -0.9233 | none       |
| SEC61B   | -0.445 | -0.4512 | -2.466 | 0.03411 | 0.106 | -4.03 | 1.83606 | none       |
| ASAH2B   | 0.342  | 0.2522  | 2.4661 | 0.03412 | 0.106 | -4.03 | -0.1556 | none       |
| DVL3     | 0.365  | 0.3274  | 2.4657 | 0.03414 | 0.106 | -4.04 | -0.5257 | none       |
| UBE2D4   | 0.235  | 0.1168  | 2.4657 | 0.03414 | 0.106 | -4.04 | -0.9031 | none       |
| RPUSD3   | 0.26   | 0.1783  | 2.4655 | 0.03415 | 0.106 | -4.04 | -0.6635 | none       |
| TPP2     | 0.669  | 0.6106  | 2.4653 | 0.03416 | 0.106 | -4.04 | -0.1956 | none       |
| RHOA     | -0.401 | -0.4203 | -2.465 | 0.0342  | 0.106 | -4.04 | 1.92017 | none       |
| ZFYVE26  | 0.552  | 0.4408  | 2.4646 | 0.0342  | 0.106 | -4.04 | -1.3865 | none       |
| DDIAS    | 0.56   | 0.4733  | 2.4642 | 0.03423 | 0.106 | -4.04 | -0.8212 | none       |
| IFT57    | -0.334 | -0.2904 | -2.463 | 0.03428 | 0.106 | -4.04 | 1.59686 | none       |
| LYZ      | 0.643  | 0.4578  | 2.4627 | 0.03431 | 0.106 | -4.04 | -1.0078 | none       |
| GBP4     | 0.271  | 0.1842  | 2.4625 | 0.03432 | 0.106 | -4.04 | -1.0162 | none       |
| MTRNR2L4 | 0.195  | 0.1384  | 2.4624 | 0.03433 | 0.106 | -4.04 | 0.19669 | none       |
| UQCRH    | -0.416 | -0.4449 | -2.462 | 0.03434 | 0.106 | -4.04 | 1.5486  | none       |
| RPL15    | -0.393 | -0.4014 | -2.462 | 0.03437 | 0.106 | -4.04 | 2.05844 | none       |
| COX6B1   | -0.376 | -0.3601 | -2.461 | 0.03439 | 0.106 | -4.04 | 1.66291 | none       |
| TPP1     | 0.371  | 0.3389  | 2.4608 | 0.03443 | 0.106 | -4.04 | -0.6642 | none       |
| PSMA1    | -0.33  | -0.3382 | -2.46  | 0.03445 | 0.106 | -4.04 | 1.92081 | none       |

|         |        |         |        |         |       |       |         |            |
|---------|--------|---------|--------|---------|-------|-------|---------|------------|
| RUNDC3A | 0.395  | 0.2479  | 2.4592 | 0.03452 | 0.106 | -4.05 | -1.047  | none       |
| UQCR10  | -0.311 | -0.3135 | -2.459 | 0.03453 | 0.106 | -4.05 | 0.63934 | none       |
| PRKAR2A | 0.57   | 0.555   | 2.4587 | 0.03455 | 0.107 | -4.05 | -0.5003 | none       |
| TUBB4B  | -0.262 | -0.2501 | -2.457 | 0.03466 | 0.107 | -4.05 | 1.57577 | none       |
| NCOA3   | 0.664  | 0.6576  | 2.4565 | 0.03467 | 0.107 | -4.05 | -0.5883 | none       |
| SIRT4   | -0.274 | -0.2595 | -2.457 | 0.03467 | 0.107 | -4.05 | 2.19194 | AA-related |
| URB2    | 0.265  | 0.236   | 2.4563 | 0.03468 | 0.107 | -4.05 | 0.28093 | none       |
| CNKSR2  | 0.496  | 0.4408  | 2.4559 | 0.03471 | 0.107 | -4.05 | -0.3753 | none       |
| ANKRD7  | 0.348  | 0.2316  | 2.4557 | 0.03472 | 0.107 | -4.05 | -0.3809 | none       |
| IL32    | -0.281 | -0.2653 | -2.456 | 0.03473 | 0.107 | -4.05 | 1.92073 | none       |
| SPAG4   | 0.468  | 0.3923  | 2.4555 | 0.03473 | 0.107 | -4.05 | -0.7503 | none       |
| NUP210  | 0.588  | 0.6463  | 2.4554 | 0.03474 | 0.107 | -4.05 | -0.5061 | none       |
| PUS7    | 0.395  | 0.3974  | 2.4548 | 0.03478 | 0.107 | -4.05 | -0.0363 | none       |
| CSTB    | -0.328 | -0.3265 | -2.454 | 0.03483 | 0.107 | -4.05 | 1.9723  | none       |
| CLEC17A | 0.3    | 0.2409  | 2.4536 | 0.03485 | 0.107 | -4.05 | -0.7773 | none       |
| KIFC2   | 0.468  | 0.4297  | 2.4532 | 0.03487 | 0.107 | -4.06 | -0.0203 | none       |
| DCX     | 0.194  | 0.134   | 2.4523 | 0.03492 | 0.107 | -4.06 | -1.453  | none       |
| RB1     | 0.359  | 0.3191  | 2.452  | 0.03494 | 0.107 | -4.06 | 0.02281 | none       |
| S100A11 | -0.256 | -0.2656 | -2.452 | 0.03495 | 0.107 | -4.06 | 0.90683 | none       |
| TTBK1   | 0.208  | 0.2021  | 2.4509 | 0.035   | 0.108 | -4.06 | -1.2253 | none       |
| LGALS7  | 0.303  | 0.25    | 2.4508 | 0.03501 | 0.108 | -4.06 | -0.327  | none       |
| HSPB1   | -0.322 | -0.2627 | -2.451 | 0.03501 | 0.108 | -4.06 | 1.58535 | none       |
| DHX33   | 0.375  | 0.4299  | 2.4501 | 0.03505 | 0.108 | -4.06 | -0.4606 | none       |
| CHMP5   | -0.432 | -0.4456 | -2.449 | 0.03512 | 0.108 | -4.06 | 1.51269 | none       |
| ZNF148  | 0.433  | 0.4212  | 2.4488 | 0.03513 | 0.108 | -4.06 | -0.3727 | none       |
| UMOD    | -0.236 | -0.1772 | -2.449 | 0.03513 | 0.108 | -4.06 | 0.04135 | none       |
| ZNF195  | 0.361  | 0.3042  | 2.4483 | 0.03516 | 0.108 | -4.06 | -1.1774 | none       |
| LY6E    | -0.444 | -0.4053 | -2.448 | 0.03517 | 0.108 | -4.06 | 1.96734 | none       |
| AIF1L   | -0.397 | -0.3674 | -2.447 | 0.03524 | 0.108 | -4.07 | 2.07553 | none       |
| BTNL8   | 0.272  | 0.1951  | 2.4463 | 0.03527 | 0.108 | -4.07 | -0.0795 | none       |
| GXYLT1  | 0.47   | 0.3955  | 2.4463 | 0.03528 | 0.108 | -4.07 | -0.4467 | none       |
| CSF2RB  | 0.255  | 0.2537  | 2.446  | 0.03529 | 0.108 | -4.07 | -0.7943 | none       |
| MED15   | 0.615  | 0.6542  | 2.4449 | 0.03536 | 0.108 | -4.07 | -0.4986 | none       |
| MYLK    | 0.332  | 0.2933  | 2.4444 | 0.03539 | 0.108 | -4.07 | -0.8891 | none       |
| P4HA3   | 0.469  | 0.2521  | 2.4439 | 0.03542 | 0.109 | -4.07 | -0.9819 | none       |
| CLSTN3  | 0.389  | 0.4664  | 2.4438 | 0.03542 | 0.109 | -4.07 | 0.42872 | none       |
| ACOT13  | -0.287 | -0.2544 | -2.444 | 0.03543 | 0.109 | -4.07 | 1.90335 | none       |
| EVA1C   | -0.458 | -0.3373 | -2.444 | 0.03543 | 0.109 | -4.07 | 2.03719 | none       |
| MLF1    | 0.335  | 0.2284  | 2.4436 | 0.03544 | 0.109 | -4.07 | -0.8875 | none       |
| GTF2E1  | 0.225  | 0.0597  | 2.4432 | 0.03546 | 0.109 | -4.07 | -0.6677 | none       |

|           |        |         |        |         |       |       |         |            |
|-----------|--------|---------|--------|---------|-------|-------|---------|------------|
| SEL1L3    | 0.295  | 0.2655  | 2.443  | 0.03547 | 0.109 | -4.07 | -0.4794 | none       |
| PRPF4     | 0.212  | 0.1847  | 2.4429 | 0.03548 | 0.109 | -4.07 | -0.934  | none       |
| F10       | 0.205  | 0.1963  | 2.4424 | 0.03551 | 0.109 | -4.07 | 0.43733 | none       |
| EXOSC10   | 0.674  | 0.6603  | 2.4423 | 0.03551 | 0.109 | -4.07 | -0.8904 | none       |
| NEXN      | 0.351  | 0.2378  | 2.4421 | 0.03553 | 0.109 | -4.07 | -0.6934 | none       |
| SRFBP1    | 0.496  | 0.4759  | 2.4419 | 0.03554 | 0.109 | -4.07 | -0.4899 | none       |
| TECPR1    | 0.493  | 0.4682  | 2.4418 | 0.03555 | 0.109 | -4.07 | -0.7073 | none       |
| DCDC1     | 0.268  | 0.2019  | 2.4413 | 0.03557 | 0.109 | -4.07 | -1.3381 | none       |
| ACTA2     | 0.367  | 0.264   | 2.4413 | 0.03557 | 0.109 | -4.07 | -1.0878 | none       |
| GOSR2     | 0.297  | 0.2063  | 2.4412 | 0.03558 | 0.109 | -4.07 | -0.0543 | none       |
| KIDINS220 | 0.614  | 0.6268  | 2.4402 | 0.03564 | 0.109 | -4.08 | -0.7498 | none       |
| TMEM265   | 0.317  | 0.2821  | 2.44   | 0.03565 | 0.109 | -4.08 | -0.2633 | none       |
| UBAP2     | 0.525  | 0.4769  | 2.4398 | 0.03566 | 0.109 | -4.08 | -0.5727 | none       |
| SLC18A1   | 0.242  | 0.2149  | 2.4397 | 0.03567 | 0.109 | -4.08 | 0.22271 | none       |
| ANKFY1    | 0.493  | 0.4773  | 2.4391 | 0.03571 | 0.109 | -4.08 | -0.8079 | none       |
| SBNO2     | 0.446  | 0.4396  | 2.4385 | 0.03574 | 0.109 | -4.08 | -0.4173 | none       |
| SLC1A5    | -0.25  | -0.2095 | -2.438 | 0.03576 | 0.109 | -4.08 | 1.89479 | none       |
| SIRT3     | 0.396  | 0.3091  | 2.438  | 0.03577 | 0.109 | -4.08 | -1.0267 | none       |
| COA6      | -0.425 | -0.425  | -2.437 | 0.03583 | 0.109 | -4.08 | 1.73256 | none       |
| B3GNTL1   | 0.42   | 0.3399  | 2.437  | 0.03583 | 0.109 | -4.08 | -0.1428 | none       |
| RCN3      | 0.32   | 0.2536  | 2.4369 | 0.03584 | 0.109 | -4.08 | -1.1386 | none       |
| HNF4G     | 0.871  | 0.636   | 2.4367 | 0.03585 | 0.109 | -4.08 | -0.9476 | none       |
| KANK3     | 0.325  | 0.2543  | 2.4366 | 0.03586 | 0.109 | -4.08 | -0.4487 | none       |
| LASP1     | 0.324  | 0.2672  | 2.4364 | 0.03587 | 0.109 | -4.08 | -0.0653 | none       |
| SLC44A2   | 0.377  | 0.2526  | 2.4363 | 0.03588 | 0.109 | -4.08 | -0.7221 | none       |
| COQ10B    | 0.249  | 0.0913  | 2.436  | 0.0359  | 0.109 | -4.08 | -0.21   | none       |
| PHYKPL    | 0.247  | 0.1851  | 2.4334 | 0.03605 | 0.11  | -4.09 | 0.036   | none       |
| UQCRFS1   | -0.415 | -0.3923 | -2.433 | 0.03606 | 0.11  | -4.09 | 2.03752 | none       |
| CCT8      | -0.248 | -0.1826 | -2.433 | 0.03607 | 0.11  | -4.09 | 2.18123 | AA-related |
| LRRC47    | 0.294  | 0.2545  | 2.4331 | 0.03607 | 0.11  | -4.09 | -0.401  | none       |
| DPP6      | 0.204  | 0.1537  | 2.433  | 0.03608 | 0.11  | -4.09 | -1.0571 | none       |
| GLI4      | 0.384  | 0.2548  | 2.4328 | 0.03609 | 0.11  | -4.09 | 0.16239 | none       |
| ABHD18    | 0.3    | 0.1512  | 2.4323 | 0.03612 | 0.11  | -4.09 | -1.1272 | none       |
| UBTD1     | -0.395 | -0.3132 | -2.432 | 0.03614 | 0.11  | -4.09 | 0.77582 | none       |
| HAUS2     | 0.299  | 0.1761  | 2.4312 | 0.03619 | 0.11  | -4.09 | -1.082  | none       |
| CHCHD4    | -0.271 | -0.2619 | -2.431 | 0.03622 | 0.11  | -4.09 | 2.26083 | AA-related |
| RAP2B     | 0.216  | 0.0884  | 2.4307 | 0.03622 | 0.11  | -4.09 | 0.17105 | none       |
| USP28     | 0.419  | 0.3474  | 2.4306 | 0.03623 | 0.11  | -4.09 | 0.40531 | none       |
| INSR      | 0.354  | 0.2277  | 2.4302 | 0.03624 | 0.11  | -4.09 | -0.8719 | none       |
| NHSL2     | 0.192  | 0.157   | 2.4302 | 0.03625 | 0.11  | -4.09 | -0.8924 | none       |

|          |        |         |        |         |       |       |         |            |
|----------|--------|---------|--------|---------|-------|-------|---------|------------|
| NDUFAB1  | -0.4   | -0.3961 | -2.43  | 0.03628 | 0.11  | -4.09 | 1.83869 | none       |
| MCCC1    | 0.268  | 0.2129  | 2.4297 | 0.03628 | 0.11  | -4.09 | -0.5339 | none       |
| ZNF384   | 0.594  | 0.572   | 2.4293 | 0.0363  | 0.11  | -4.09 | -0.857  | none       |
| YIPF3    | 0.369  | 0.2205  | 2.4288 | 0.03633 | 0.11  | -4.09 | -0.6338 | none       |
| FNBP4    | 0.621  | 0.5865  | 2.4287 | 0.03634 | 0.11  | -4.09 | -0.203  | none       |
| SLC41A1  | 0.237  | 0.2592  | 2.4284 | 0.03636 | 0.11  | -4.1  | -0.4907 | none       |
| STOML2   | -0.324 | -0.2954 | -2.428 | 0.03641 | 0.111 | -4.1  | 2.48889 | AA-related |
| RAB19    | 0.746  | 0.5805  | 2.4275 | 0.03641 | 0.111 | -4.1  | -1.2175 | none       |
| RBAK     | 0.621  | 0.5508  | 2.4275 | 0.03641 | 0.111 | -4.1  | -1.0836 | none       |
| CHRNA2   | 0.34   | 0.2936  | 2.4271 | 0.03644 | 0.111 | -4.1  | 0.06722 | none       |
| PIGL     | 0.368  | 0.2867  | 2.4268 | 0.03645 | 0.111 | -4.1  | -1.3573 | none       |
| BORCS7-A | -0.181 | -0.1813 | -2.427 | 0.03647 | 0.111 | -4.1  | 0.6785  | none       |
| OVGP1    | 0.362  | 0.3129  | 2.4262 | 0.03649 | 0.111 | -4.1  | -0.5822 | none       |
| FMNL2    | 0.458  | 0.3844  | 2.426  | 0.03651 | 0.111 | -4.1  | -0.0067 | none       |
| NFX1     | 0.602  | 0.5886  | 2.426  | 0.03651 | 0.111 | -4.1  | -1.0595 | none       |
| IQGAP2   | 0.882  | 0.7995  | 2.4259 | 0.03651 | 0.111 | -4.1  | -0.9845 | none       |
| RCC1     | 0.268  | 0.2432  | 2.4257 | 0.03652 | 0.111 | -4.1  | 0.3354  | none       |
| PIK3C2A  | 0.693  | 0.7099  | 2.4253 | 0.03655 | 0.111 | -4.1  | -0.0157 | none       |
| ARL3     | -0.277 | -0.2612 | -2.425 | 0.03655 | 0.111 | -4.1  | 1.36561 | none       |
| LSM1     | -0.341 | -0.337  | -2.425 | 0.03656 | 0.111 | -4.1  | 1.02289 | none       |
| CHMP4A   | 0.362  | 0.3271  | 2.4251 | 0.03656 | 0.111 | -4.1  | -1.3328 | none       |
| ZNF134   | 0.388  | 0.3021  | 2.4248 | 0.03658 | 0.111 | -4.1  | -0.4968 | none       |
| MTRNR2L1 | -0.392 | -0.3427 | -2.425 | 0.0366  | 0.111 | -4.1  | 0.89187 | none       |
| TACC1    | 0.514  | 0.4994  | 2.4244 | 0.0366  | 0.111 | -4.1  | -0.0539 | none       |
| TRIP10   | 0.284  | 0.3122  | 2.4236 | 0.03665 | 0.111 | -4.1  | -0.4097 | none       |
| SFXN2    | 0.274  | 0.1899  | 2.4236 | 0.03666 | 0.111 | -4.1  | -0.0343 | none       |
| PRKCE    | 0.541  | 0.5004  | 2.4232 | 0.03668 | 0.111 | -4.1  | -0.9168 | none       |
| PIAS2    | 0.362  | 0.2648  | 2.4229 | 0.0367  | 0.111 | -4.1  | 0.32182 | none       |
| TFAP4    | 0.412  | 0.4158  | 2.4228 | 0.0367  | 0.111 | -4.1  | -0.2396 | none       |
| LAMP1    | 0.337  | 0.2687  | 2.4224 | 0.03673 | 0.111 | -4.11 | -1.1695 | none       |
| WDR45B   | 0.218  | 0.1061  | 2.4221 | 0.03675 | 0.111 | -4.11 | -0.2759 | none       |
| RBX1     | -0.392 | -0.3903 | -2.421 | 0.03678 | 0.111 | -4.11 | 1.58599 | none       |
| TPH2     | 0.399  | 0.3141  | 2.4214 | 0.03679 | 0.111 | -4.11 | -0.7546 | none       |
| MOSPD3   | 0.284  | 0.1774  | 2.4211 | 0.03681 | 0.111 | -4.11 | -0.4102 | none       |
| WDR89    | 0.207  | 0.1095  | 2.421  | 0.03682 | 0.111 | -4.11 | -0.5359 | none       |
| SCYL1    | 0.406  | 0.4045  | 2.42   | 0.03688 | 0.111 | -4.11 | -0.1248 | none       |
| AKT1S1   | 0.522  | 0.403   | 2.4199 | 0.03689 | 0.111 | -4.11 | -1.1841 | none       |
| CD81     | -0.378 | -0.2882 | -2.42  | 0.03691 | 0.111 | -4.11 | 0.98785 | none       |
| CENPN    | -0.205 | -0.1683 | -2.419 | 0.03691 | 0.111 | -4.11 | 1.12526 | none       |
| FMNL1    | 0.599  | 0.6307  | 2.4194 | 0.03692 | 0.111 | -4.11 | -0.9847 | none       |

|          |        |         |        |         |       |       |         |            |
|----------|--------|---------|--------|---------|-------|-------|---------|------------|
| IRF5     | 0.465  | 0.3133  | 2.4189 | 0.03694 | 0.111 | -4.11 | -0.9581 | none       |
| SRSF6    | 0.579  | 0.5588  | 2.4184 | 0.03698 | 0.112 | -4.11 | -1.104  | none       |
| CTNNB1   | 0.283  | 0.2868  | 2.4183 | 0.03699 | 0.112 | -4.11 | -0.735  | none       |
| NF1      | 0.594  | 0.5815  | 2.4181 | 0.03699 | 0.112 | -4.11 | -0.781  | none       |
| JAZF1    | 0.389  | 0.2885  | 2.4179 | 0.03701 | 0.112 | -4.11 | -0.5991 | none       |
| CD83     | -0.235 | -0.1726 | -2.418 | 0.03702 | 0.112 | -4.11 | 2.59559 | AA-related |
| NCOA6    | 0.599  | 0.6069  | 2.4173 | 0.03704 | 0.112 | -4.11 | -0.9774 | none       |
| SEC11C   | -0.348 | -0.3773 | -2.417 | 0.03706 | 0.112 | -4.11 | 1.34324 | none       |
| CBX2     | 0.289  | 0.3139  | 2.4159 | 0.03713 | 0.112 | -4.12 | -0.2713 | none       |
| SCYL3    | 0.297  | 0.2299  | 2.415  | 0.03719 | 0.112 | -4.12 | -1.0665 | none       |
| SLC26A2  | 0.397  | 0.3229  | 2.4149 | 0.03719 | 0.112 | -4.12 | -1.2217 | none       |
| ZC3H12D  | 0.619  | 0.6689  | 2.4145 | 0.03722 | 0.112 | -4.12 | -0.4444 | none       |
| RPS27A   | -0.443 | -0.4651 | -2.414 | 0.03724 | 0.112 | -4.12 | 1.84806 | none       |
| OLFM2    | 0.33   | 0.2361  | 2.4142 | 0.03724 | 0.112 | -4.12 | -0.9588 | none       |
| ELAC1    | 0.257  | 0.1875  | 2.4136 | 0.03728 | 0.112 | -4.12 | -0.2384 | none       |
| CLIP3    | 0.518  | 0.5157  | 2.4133 | 0.03729 | 0.112 | -4.12 | 0.05481 | none       |
| SUPT16H  | 0.742  | 0.7506  | 2.4129 | 0.03732 | 0.112 | -4.12 | -0.8666 | none       |
| AKAP13   | 0.633  | 0.6147  | 2.4127 | 0.03734 | 0.112 | -4.12 | -0.8261 | none       |
| ZSCAN21  | 0.328  | 0.2135  | 2.4119 | 0.03739 | 0.112 | -4.12 | -0.562  | none       |
| CLSPN    | 0.713  | 0.7257  | 2.4107 | 0.03746 | 0.113 | -4.12 | -1.014  | none       |
| SFXN4    | -0.272 | -0.2757 | -2.411 | 0.03746 | 0.113 | -4.12 | 1.83069 | none       |
| PTPN20   | 0.32   | 0.239   | 2.4091 | 0.03756 | 0.113 | -4.13 | -0.7508 | none       |
| DHX35    | 0.226  | 0.2107  | 2.4089 | 0.03757 | 0.113 | -4.13 | 0.14996 | none       |
| C2ORF69  | 0.279  | 0.2159  | 2.4087 | 0.03759 | 0.113 | -4.13 | 1.06411 | none       |
| GSR      | 0.458  | 0.428   | 2.4082 | 0.03762 | 0.113 | -4.13 | -0.721  | none       |
| SERHL2   | 0.422  | 0.2586  | 2.4082 | 0.03762 | 0.113 | -4.13 | -0.9664 | none       |
| CTIF     | 0.35   | 0.288   | 2.4081 | 0.03762 | 0.113 | -4.13 | -0.521  | none       |
| PRKCSH   | 0.534  | 0.5501  | 2.4075 | 0.03766 | 0.113 | -4.13 | -0.6029 | none       |
| KIZ      | 0.407  | 0.3653  | 2.4075 | 0.03766 | 0.113 | -4.13 | -0.6064 | none       |
| ANKRD29  | 0.213  | 0.1649  | 2.4075 | 0.03766 | 0.113 | -4.13 | -0.3005 | none       |
| MRPS2    | -0.254 | -0.19   | -2.407 | 0.03769 | 0.113 | -4.13 | 1.921   | none       |
| SIX4     | 0.217  | 0.182   | 2.4065 | 0.03772 | 0.113 | -4.13 | -1.0041 | none       |
| CELA3B   | 0.529  | 0.2694  | 2.4063 | 0.03774 | 0.113 | -4.13 | -1.1584 | none       |
| PHF19    | -0.266 | -0.2141 | -2.406 | 0.03775 | 0.113 | -4.13 | 2.25199 | AA-related |
| ZC3H18   | 0.762  | 0.824   | 2.4061 | 0.03775 | 0.113 | -4.13 | -0.4284 | none       |
| PIGW     | 0.343  | 0.2095  | 2.4054 | 0.03779 | 0.113 | -4.13 | 0.20203 | none       |
| RPA4     | -0.19  | -0.1284 | -2.405 | 0.03783 | 0.113 | -4.13 | -0.1138 | none       |
| C1ORF100 | 0.354  | 0.2799  | 2.4049 | 0.03783 | 0.113 | -4.13 | -0.8191 | none       |
| DZIP3    | 0.453  | 0.3687  | 2.4038 | 0.0379  | 0.114 | -4.13 | -0.7345 | none       |
| DDX60L   | 0.549  | 0.4723  | 2.4037 | 0.03791 | 0.114 | -4.14 | -1.4173 | none       |



|          |        |         |        |         |       |       |         |            |
|----------|--------|---------|--------|---------|-------|-------|---------|------------|
| WBP2     | 0.229  | 0.1843  | 2.4032 | 0.03793 | 0.114 | -4.14 | -0.0411 | none       |
| BCKDHB   | 0.279  | 0.1481  | 2.4026 | 0.03798 | 0.114 | -4.14 | -0.2678 | none       |
| IMMP2L   | 0.517  | 0.32    | 2.4018 | 0.03803 | 0.114 | -4.14 | -0.9317 | none       |
| SCRN2    | 0.338  | 0.2882  | 2.4017 | 0.03803 | 0.114 | -4.14 | -0.6964 | none       |
| TRO      | -0.28  | -0.213  | -2.401 | 0.03805 | 0.114 | -4.14 | 1.52361 | none       |
| CDRT4    | 0.363  | 0.2549  | 2.4014 | 0.03805 | 0.114 | -4.14 | -0.5709 | none       |
| MAPKAP1  | 0.377  | 0.3549  | 2.4009 | 0.03808 | 0.114 | -4.14 | -0.8737 | none       |
| KCNE1    | 0.276  | 0.1563  | 2.3997 | 0.03816 | 0.114 | -4.14 | -1.0838 | none       |
| EEF1G    | -0.271 | -0.2476 | -2.4   | 0.03817 | 0.114 | -4.14 | 0.70757 | none       |
| NOTCH3   | 0.561  | 0.4397  | 2.3995 | 0.03818 | 0.114 | -4.14 | 0.11729 | none       |
| TBC1D25  | 0.378  | 0.2608  | 2.3988 | 0.03822 | 0.114 | -4.14 | -0.8049 | none       |
| DDX39A   | -0.212 | -0.1294 | -2.399 | 0.03822 | 0.114 | -4.14 | 1.66807 | none       |
| GOLGA4   | 0.39   | 0.4239  | 2.3987 | 0.03822 | 0.114 | -4.14 | -0.0786 | none       |
| ZNF622   | -0.195 | -0.1128 | -2.399 | 0.03824 | 0.114 | -4.14 | 1.7575  | none       |
| TAX1BP3  | -0.308 | -0.2896 | -2.398 | 0.03825 | 0.114 | -4.14 | 1.761   | none       |
| EVC      | 0.292  | 0.2445  | 2.3974 | 0.03831 | 0.114 | -4.15 | -0.8746 | none       |
| PRRC2A   | 0.833  | 0.7263  | 2.3972 | 0.03832 | 0.115 | -4.15 | -1.1943 | none       |
| ITPRIPL1 | 0.251  | 0.1809  | 2.3969 | 0.03834 | 0.115 | -4.15 | -0.5797 | none       |
| TMBIM6   | -0.418 | -0.4185 | -2.397 | 0.03834 | 0.115 | -4.15 | 2.29402 | AA-related |
| THOC1    | 0.477  | 0.4332  | 2.3963 | 0.03838 | 0.115 | -4.15 | 0.08044 | none       |
| JUN      | 0.363  | 0.4     | 2.396  | 0.0384  | 0.115 | -4.15 | 0.66921 | none       |
| CDK1     | -0.394 | -0.3524 | -2.396 | 0.03842 | 0.115 | -4.15 | 1.96737 | none       |
| CCDC117  | 0.403  | 0.2734  | 2.3955 | 0.03843 | 0.115 | -4.15 | 0.28487 | none       |
| PRG4     | 0.497  | 0.4729  | 2.3953 | 0.03845 | 0.115 | -4.15 | -0.3601 | none       |
| FBXW2    | 0.21   | 0.1456  | 2.395  | 0.03846 | 0.115 | -4.15 | -0.9588 | none       |
| THNSL2   | 0.377  | 0.2733  | 2.3947 | 0.03848 | 0.115 | -4.15 | -0.9139 | none       |
| PIKFYVE  | 0.561  | 0.6033  | 2.3947 | 0.03848 | 0.115 | -4.15 | -0.2075 | none       |
| ANGPTL4  | 0.528  | 0.4259  | 2.3941 | 0.03852 | 0.115 | -4.15 | -1.0445 | none       |
| FDX2     | 0.41   | 0.3283  | 2.3929 | 0.0386  | 0.115 | -4.15 | -0.5473 | none       |
| SUN3     | 0.635  | 0.4703  | 2.3922 | 0.03865 | 0.115 | -4.15 | -1.3165 | none       |
| IGF2R    | 0.693  | 0.7863  | 2.3921 | 0.03866 | 0.115 | -4.15 | -0.3976 | none       |
| CCZ1     | -0.235 | -0.219  | -2.392 | 0.03866 | 0.115 | -4.15 | 1.30118 | none       |
| MTCP1    | -0.813 | -0.7288 | -2.392 | 0.03867 | 0.115 | -4.15 | 1.54589 | none       |
| MSANTD3  | 0.286  | 0.2773  | 2.3918 | 0.03867 | 0.115 | -4.15 | -0.9563 | none       |
| SRSF3    | -0.328 | -0.316  | -2.392 | 0.03868 | 0.115 | -4.15 | 1.61559 | none       |
| TNPO1    | 0.24   | 0.1717  | 2.3916 | 0.03868 | 0.115 | -4.15 | -0.254  | none       |
| POLR1B   | 0.298  | 0.2659  | 2.3915 | 0.03869 | 0.115 | -4.15 | 0.15815 | none       |
| CDC25A   | 0.234  | 0.2736  | 2.3914 | 0.0387  | 0.115 | -4.16 | -0.5821 | none       |
| PBOV1    | 0.208  | 0.1491  | 2.3903 | 0.03877 | 0.115 | -4.16 | -0.4887 | none       |
| RPL17    | -0.353 | -0.3622 | -2.39  | 0.03877 | 0.115 | -4.16 | 2.04426 | none       |

|           |        |         |        |         |       |       |         |      |
|-----------|--------|---------|--------|---------|-------|-------|---------|------|
| TNKS1BP1  | 0.436  | 0.442   | 2.3896 | 0.03882 | 0.115 | -4.16 | -0.117  | none |
| MAPK8     | 0.419  | 0.2577  | 2.3893 | 0.03884 | 0.115 | -4.16 | -0.5102 | none |
| WRN       | 0.504  | 0.4688  | 2.3892 | 0.03884 | 0.115 | -4.16 | -0.6101 | none |
| EFHC1     | 0.392  | 0.2849  | 2.3892 | 0.03884 | 0.115 | -4.16 | -1.3679 | none |
| SDCBP     | -0.369 | -0.3731 | -2.389 | 0.03885 | 0.115 | -4.16 | 1.77346 | none |
| ATAD3C    | 0.624  | 0.5218  | 2.389  | 0.03886 | 0.115 | -4.16 | -0.9056 | none |
| NAE1      | 0.197  | 0.095   | 2.3889 | 0.03886 | 0.115 | -4.16 | -0.1888 | none |
| AVL9      | 0.27   | 0.207   | 2.3889 | 0.03886 | 0.115 | -4.16 | -1.2464 | none |
| NEDD4L    | 0.488  | 0.3999  | 2.3888 | 0.03887 | 0.115 | -4.16 | -0.892  | none |
| BHLHB9    | 0.265  | 0.171   | 2.3886 | 0.03888 | 0.116 | -4.16 | -0.4904 | none |
| SP4       | 0.423  | 0.3515  | 2.3883 | 0.0389  | 0.116 | -4.16 | -0.9461 | none |
| SLC2A10   | 0.362  | 0.2566  | 2.3871 | 0.03898 | 0.116 | -4.16 | -0.8705 | none |
| SOCS3     | 0.193  | 0.181   | 2.3868 | 0.039   | 0.116 | -4.16 | 0.66836 | none |
| PRC1      | 0.413  | 0.3879  | 2.3866 | 0.03901 | 0.116 | -4.16 | -0.7189 | none |
| AMZ2      | 0.193  | 0.1453  | 2.3865 | 0.03902 | 0.116 | -4.16 | 0.68627 | none |
| TMA16     | 0.255  | 0.1319  | 2.3865 | 0.03902 | 0.116 | -4.16 | -0.9205 | none |
| SRA1      | -0.333 | -0.2938 | -2.386 | 0.03904 | 0.116 | -4.16 | 1.43095 | none |
| ST3GAL6   | 0.444  | 0.3231  | 2.3859 | 0.03906 | 0.116 | -4.16 | -0.9747 | none |
| THOC7     | -0.285 | -0.3081 | -2.386 | 0.03908 | 0.116 | -4.16 | 1.75662 | none |
| HIST2H2BI | 0.327  | 0.3811  | 2.3845 | 0.03915 | 0.116 | -4.17 | 0.27605 | none |
| MED20     | 0.29   | 0.1727  | 2.3843 | 0.03916 | 0.116 | -4.17 | -1.0222 | none |
| PPARGC1A  | 0.433  | 0.3354  | 2.3838 | 0.0392  | 0.116 | -4.17 | 1.049   | none |
| SLFNL1    | 0.275  | 0.2823  | 2.3828 | 0.03926 | 0.116 | -4.17 | -0.4336 | none |
| KCTD3     | 0.578  | 0.4068  | 2.3827 | 0.03927 | 0.116 | -4.17 | -1.0076 | none |
| SYNE1     | 0.553  | 0.5155  | 2.3827 | 0.03927 | 0.116 | -4.17 | -1.0616 | none |
| ITGAE     | -0.348 | -0.345  | -2.382 | 0.03929 | 0.116 | -4.17 | 1.34284 | none |
| CNN2      | 0.283  | 0.1816  | 2.3822 | 0.0393  | 0.116 | -4.17 | -0.2593 | none |
| CR2       | -0.312 | -0.2906 | -2.382 | 0.03931 | 0.116 | -4.17 | 0.39531 | none |
| DUS4L     | 0.269  | 0.2238  | 2.3814 | 0.03936 | 0.117 | -4.17 | 1.42903 | none |
| NRG2      | -0.195 | -0.1501 | -2.381 | 0.03937 | 0.117 | -4.17 | 0.20422 | none |
| LAMTOR2   | -0.189 | -0.1355 | -2.381 | 0.03938 | 0.117 | -4.17 | 0.95839 | none |
| MXD1      | 0.293  | 0.2385  | 2.3804 | 0.03942 | 0.117 | -4.17 | 0.59638 | none |
| HPS6      | -0.223 | -0.1474 | -2.38  | 0.03944 | 0.117 | -4.17 | 1.38152 | none |
| OTUD5     | 0.487  | 0.4137  | 2.3801 | 0.03944 | 0.117 | -4.17 | -1.0275 | none |
| ACVR2B    | 0.209  | 0.1954  | 2.38   | 0.03945 | 0.117 | -4.17 | -0.7015 | none |
| FAM20B    | 0.45   | 0.3789  | 2.379  | 0.03952 | 0.117 | -4.17 | -1.2954 | none |
| ADAM12    | 0.238  | 0.194   | 2.3787 | 0.03954 | 0.117 | -4.18 | -0.1435 | none |
| SLC39A3   | 0.311  | 0.1745  | 2.3785 | 0.03955 | 0.117 | -4.18 | -0.6363 | none |
| LYN       | 0.311  | 0.2233  | 2.3784 | 0.03955 | 0.117 | -4.18 | -0.4705 | none |
| GDI1      | 0.313  | 0.2792  | 2.3778 | 0.0396  | 0.117 | -4.18 | -0.302  | none |

|          |        |         |        |         |       |       |         |            |
|----------|--------|---------|--------|---------|-------|-------|---------|------------|
| NCOR2    | 0.572  | 0.6329  | 2.3777 | 0.0396  | 0.117 | -4.18 | -0.7997 | none       |
| ZNRF3    | 0.291  | 0.2382  | 2.3771 | 0.03964 | 0.117 | -4.18 | -1.3896 | none       |
| NELL2    | 0.672  | 0.449   | 2.3769 | 0.03965 | 0.117 | -4.18 | -0.7809 | none       |
| FCGBP    | 0.415  | 0.3432  | 2.3768 | 0.03966 | 0.117 | -4.18 | 0.70356 | none       |
| COMMD3   | -0.326 | -0.353  | -2.377 | 0.03966 | 0.117 | -4.18 | 1.47217 | none       |
| PSMG4    | 0.441  | 0.2508  | 2.3759 | 0.03972 | 0.117 | -4.18 | -0.7077 | none       |
| SPTAN1   | 0.752  | 0.8613  | 2.3759 | 0.03972 | 0.117 | -4.18 | -0.5289 | none       |
| TSNAX    | 0.249  | 0.1057  | 2.3746 | 0.03981 | 0.117 | -4.18 | -0.5348 | none       |
| SH3BP1   | 0.45   | 0.4356  | 2.3745 | 0.03981 | 0.117 | -4.18 | -0.4036 | none       |
| GON7     | 1.084  | 0.9419  | 2.3743 | 0.03983 | 0.118 | -4.18 | 0.55958 | none       |
| SUPT4H1  | -0.408 | -0.443  | -2.374 | 0.03986 | 0.118 | -4.18 | 1.65275 | none       |
| CNTNAP2  | 0.618  | 0.5297  | 2.3735 | 0.03988 | 0.118 | -4.18 | -0.5533 | none       |
| H1FO     | 0.301  | 0.2802  | 2.373  | 0.03991 | 0.118 | -4.18 | 0.3095  | none       |
| NRDC     | 0.384  | 0.3502  | 2.3718 | 0.04    | 0.118 | -4.19 | -0.1072 | none       |
| C12ORF45 | 0.34   | 0.1883  | 2.3715 | 0.04002 | 0.118 | -4.19 | -0.9753 | none       |
| PEX12    | 0.22   | 0.1544  | 2.3701 | 0.04012 | 0.118 | -4.19 | -1.0796 | none       |
| TMEM229  | 0.251  | 0.2036  | 2.3697 | 0.04014 | 0.118 | -4.19 | -0.4632 | none       |
| FILIP1   | 0.186  | 0.1386  | 2.3695 | 0.04015 | 0.118 | -4.19 | -1.2926 | none       |
| GALNT15  | 0.534  | 0.3809  | 2.3694 | 0.04016 | 0.118 | -4.19 | -1.105  | none       |
| ATP1B1   | 0.272  | 0.2583  | 2.3681 | 0.04025 | 0.119 | -4.19 | -0.4202 | none       |
| HEMGN    | 0.286  | 0.231   | 2.3681 | 0.04025 | 0.119 | -4.19 | -1.4258 | none       |
| IL18BP   | 0.451  | 0.3872  | 2.3672 | 0.04031 | 0.119 | -4.19 | -0.6472 | none       |
| HBQ1     | 0.355  | 0.4039  | 2.367  | 0.04033 | 0.119 | -4.19 | 1.48792 | none       |
| SSBP1    | -0.311 | -0.3084 | -2.367 | 0.04033 | 0.119 | -4.19 | 1.65143 | none       |
| RNF113A  | -0.222 | -0.2242 | -2.367 | 0.04035 | 0.119 | -4.19 | 2.35228 | AA-related |
| TPT1     | -0.452 | -0.4656 | -2.367 | 0.04035 | 0.119 | -4.19 | 1.54772 | none       |
| SSR2     | -0.376 | -0.3993 | -2.366 | 0.04038 | 0.119 | -4.2  | 2.2508  | AA-related |
| ASNA1    | -0.318 | -0.264  | -2.366 | 0.04038 | 0.119 | -4.2  | 1.15927 | none       |
| INO80D   | 0.28   | 0.2453  | 2.3661 | 0.04038 | 0.119 | -4.2  | -0.9885 | none       |
| ST8SIA1  | 0.37   | 0.2396  | 2.3661 | 0.04038 | 0.119 | -4.2  | -0.5565 | none       |
| PLEKHA1  | 0.364  | 0.2404  | 2.3651 | 0.04045 | 0.119 | -4.2  | -0.9451 | none       |
| PPWD1    | 0.34   | 0.2696  | 2.3649 | 0.04046 | 0.119 | -4.2  | -0.8714 | none       |
| ZNF91    | 0.673  | 0.5421  | 2.3643 | 0.04051 | 0.119 | -4.2  | -0.8529 | none       |
| ZNF322   | 0.427  | 0.4406  | 2.3643 | 0.04051 | 0.119 | -4.2  | 0.27924 | none       |
| TAF5L    | 0.295  | 0.2565  | 2.3634 | 0.04057 | 0.119 | -4.2  | -1.0431 | none       |
| WFDC2    | -0.273 | -0.2265 | -2.363 | 0.0406  | 0.119 | -4.2  | 1.09138 | none       |
| MMACHC   | 0.402  | 0.3277  | 2.3627 | 0.04062 | 0.119 | -4.2  | -1.079  | none       |
| KRBA2    | 0.363  | 0.2248  | 2.3623 | 0.04064 | 0.119 | -4.2  | -1.2538 | none       |
| LNX2     | 0.233  | 0.1476  | 2.3622 | 0.04065 | 0.119 | -4.2  | -1.2993 | none       |
| ARHGAP1  | 0.315  | 0.4152  | 2.3618 | 0.04068 | 0.119 | -4.2  | 1.06275 | none       |

|          |        |         |        |         |       |       |         |            |
|----------|--------|---------|--------|---------|-------|-------|---------|------------|
| IGF1R    | 0.485  | 0.5221  | 2.3617 | 0.04069 | 0.119 | -4.2  | -0.282  | none       |
| ECE1     | 0.737  | 0.7523  | 2.3612 | 0.04072 | 0.119 | -4.2  | -0.2593 | none       |
| NANOGNE  | 0.591  | 0.4622  | 2.3611 | 0.04072 | 0.119 | -4.2  | -0.3512 | none       |
| ZCCHC2   | 0.48   | 0.4641  | 2.3611 | 0.04072 | 0.119 | -4.2  | -0.3243 | none       |
| B4GALT2  | 0.186  | 0.1919  | 2.3607 | 0.04076 | 0.12  | -4.2  | -0.1663 | none       |
| SLC24A2  | 0.201  | 0.144   | 2.36   | 0.0408  | 0.12  | -4.21 | -1.3723 | none       |
| ZFP28    | 0.456  | 0.383   | 2.3598 | 0.04081 | 0.12  | -4.21 | 0.28081 | none       |
| NR1H3    | 0.353  | 0.2053  | 2.3596 | 0.04083 | 0.12  | -4.21 | -1.0458 | none       |
| PRRG2    | -0.258 | -0.2113 | -2.359 | 0.04089 | 0.12  | -4.21 | 1.40989 | none       |
| CEACAM4  | 0.286  | 0.1844  | 2.3584 | 0.04091 | 0.12  | -4.21 | -1.1258 | none       |
| IGSF9B   | -0.289 | -0.1448 | -2.358 | 0.04091 | 0.12  | -4.21 | 0.83338 | none       |
| MMS22L   | 0.31   | 0.1969  | 2.3583 | 0.04092 | 0.12  | -4.21 | -1.2584 | none       |
| UGT2B7   | 0.408  | 0.2877  | 2.3582 | 0.04092 | 0.12  | -4.21 | -0.6027 | none       |
| HOMEZ    | 0.325  | 0.2686  | 2.3581 | 0.04093 | 0.12  | -4.21 | 0.53439 | none       |
| KLHDC8B  | -0.333 | -0.2603 | -2.358 | 0.04094 | 0.12  | -4.21 | 0.9794  | none       |
| DIABLO   | 0.286  | 0.1428  | 2.3579 | 0.04094 | 0.12  | -4.21 | -0.9426 | none       |
| CTSS     | 0.237  | 0.1049  | 2.3571 | 0.041   | 0.12  | -4.21 | -0.3628 | none       |
| ZNF644   | 0.47   | 0.496   | 2.3562 | 0.04106 | 0.12  | -4.21 | -0.2709 | none       |
| UQCRCQ   | -0.357 | -0.3485 | -2.356 | 0.04108 | 0.12  | -4.21 | 1.48604 | none       |
| PMM2     | 0.354  | 0.3346  | 2.3559 | 0.04108 | 0.12  | -4.21 | -0.3134 | none       |
| SPATA5L1 | 0.273  | 0.2551  | 2.3548 | 0.04116 | 0.12  | -4.21 | 0.18222 | none       |
| SND1     | 0.386  | 0.3594  | 2.3546 | 0.04117 | 0.12  | -4.21 | 0.02285 | none       |
| EPC2     | 0.474  | 0.4255  | 2.3544 | 0.04118 | 0.12  | -4.21 | -0.3929 | none       |
| ATP8A1   | 0.339  | 0.3453  | 2.3542 | 0.0412  | 0.12  | -4.21 | 0.32446 | none       |
| MGAT4A   | 0.326  | 0.1708  | 2.354  | 0.04121 | 0.12  | -4.21 | -0.1739 | none       |
| TRAPPC1  | -0.186 | -0.1573 | -2.354 | 0.04122 | 0.12  | -4.22 | 2.29541 | AA-related |
| USP48    | 0.351  | 0.3453  | 2.3536 | 0.04125 | 0.12  | -4.22 | 0.29191 | none       |
| MANF     | -0.291 | -0.2282 | -2.353 | 0.0413  | 0.121 | -4.22 | 1.29602 | none       |
| PYGB     | 0.267  | 0.2785  | 2.3527 | 0.0413  | 0.121 | -4.22 | 0.13907 | none       |
| RPL12    | -0.385 | -0.4073 | -2.353 | 0.04131 | 0.121 | -4.22 | 2.11179 | AA-related |
| IKBKG    | 0.357  | 0.3284  | 2.3521 | 0.04135 | 0.121 | -4.22 | -0.1305 | none       |
| MAP3K14  | 0.487  | 0.4532  | 2.352  | 0.04136 | 0.121 | -4.22 | -0.4804 | none       |
| DGCR8    | 0.441  | 0.491   | 2.3519 | 0.04136 | 0.121 | -4.22 | -0.8876 | none       |
| TWISTNB  | -0.408 | -0.3291 | -2.352 | 0.04137 | 0.121 | -4.22 | 1.72728 | none       |
| CD99     | -0.303 | -0.3082 | -2.352 | 0.04138 | 0.121 | -4.22 | 1.85659 | none       |
| TMA7     | -0.31  | -0.2967 | -2.351 | 0.04145 | 0.121 | -4.22 | 0.95459 | none       |
| PROSER1  | 0.31   | 0.3112  | 2.35   | 0.04149 | 0.121 | -4.22 | -0.7278 | none       |
| NOD1     | 0.317  | 0.2581  | 2.35   | 0.04149 | 0.121 | -4.22 | 0.35846 | none       |
| ZNF177   | -0.267 | -0.2358 | -2.35  | 0.04151 | 0.121 | -4.22 | 1.57403 | none       |
| TAS2R5   | 0.293  | 0.2437  | 2.3494 | 0.04153 | 0.121 | -4.22 | -0.6659 | none       |

|          |        |         |        |         |       |       |         |      |
|----------|--------|---------|--------|---------|-------|-------|---------|------|
| METAP2   | 0.372  | 0.3194  | 2.3491 | 0.04156 | 0.121 | -4.22 | -0.314  | none |
| MIP      | -0.296 | -0.2389 | -2.349 | 0.04156 | 0.121 | -4.22 | 0.59734 | none |
| YLPM1    | 0.695  | 0.7153  | 2.349  | 0.04156 | 0.121 | -4.22 | -0.662  | none |
| COX8A    | -0.467 | -0.4496 | -2.349 | 0.04157 | 0.121 | -4.22 | 1.94743 | none |
| TNNT3    | 0.385  | 0.2938  | 2.3486 | 0.04159 | 0.121 | -4.22 | -0.7914 | none |
| SAP30    | -0.4   | -0.3398 | -2.348 | 0.04163 | 0.121 | -4.22 | 1.6637  | none |
| LEPROT   | 0.465  | 0.2862  | 2.3478 | 0.04164 | 0.121 | -4.22 | -0.1857 | none |
| GTSF1    | -0.26  | -0.2839 | -2.348 | 0.04166 | 0.121 | -4.23 | 1.37479 | none |
| ZNF562   | 0.429  | 0.3806  | 2.3469 | 0.04171 | 0.121 | -4.23 | -1.3874 | none |
| CALML6   | -0.154 | -0.1015 | -2.347 | 0.04173 | 0.121 | -4.23 | 1.21453 | none |
| SVBP     | 0.26   | 0.1197  | 2.3464 | 0.04175 | 0.121 | -4.23 | 0.88493 | none |
| MTCH2    | -0.371 | -0.4034 | -2.346 | 0.04176 | 0.121 | -4.23 | 1.68397 | none |
| FHOD1    | 0.431  | 0.4407  | 2.346  | 0.04177 | 0.121 | -4.23 | -0.5982 | none |
| STYX     | 0.36   | 0.1804  | 2.346  | 0.04177 | 0.121 | -4.23 | -0.7527 | none |
| RPL35A   | -0.406 | -0.4403 | -2.346 | 0.04179 | 0.121 | -4.23 | 2.07965 | none |
| ABL2     | 0.639  | 0.6149  | 2.3458 | 0.04179 | 0.121 | -4.23 | -1.3006 | none |
| RDM1     | -0.448 | -0.4056 | -2.346 | 0.04179 | 0.121 | -4.23 | 1.1848  | none |
| MRPS10   | 0.209  | 0.0833  | 2.3454 | 0.04182 | 0.122 | -4.23 | -0.381  | none |
| KCTD2    | 0.392  | 0.4145  | 2.3451 | 0.04183 | 0.122 | -4.23 | -0.7899 | none |
| SFSWAP   | 0.587  | 0.5899  | 2.345  | 0.04184 | 0.122 | -4.23 | -0.9806 | none |
| LCA5L    | 0.483  | 0.3872  | 2.3444 | 0.04188 | 0.122 | -4.23 | -1.2809 | none |
| SNX20    | 0.433  | 0.4347  | 2.3439 | 0.04192 | 0.122 | -4.23 | 0.48926 | none |
| TLK1     | 0.637  | 0.599   | 2.3435 | 0.04195 | 0.122 | -4.23 | -0.891  | none |
| BCAS4    | 0.387  | 0.2543  | 2.3433 | 0.04197 | 0.122 | -4.23 | -0.0182 | none |
| STEAP1B  | 0.26   | 0.2167  | 2.3429 | 0.04199 | 0.122 | -4.23 | -1.209  | none |
| PRR11    | 0.901  | 0.9327  | 2.3426 | 0.04201 | 0.122 | -4.23 | -0.8555 | none |
| EIF5AL1  | -0.327 | -0.2268 | -2.342 | 0.04205 | 0.122 | -4.23 | 0.39023 | none |
| CARD6    | 0.208  | 0.1582  | 2.3417 | 0.04208 | 0.122 | -4.23 | -1.4711 | none |
| KBTBD3   | -0.547 | -0.4914 | -2.342 | 0.04209 | 0.122 | -4.23 | 1.24224 | none |
| C1ORF53  | 0.48   | 0.3653  | 2.3412 | 0.04211 | 0.122 | -4.24 | 0.87904 | none |
| ARL8A    | 0.414  | 0.3454  | 2.341  | 0.04212 | 0.122 | -4.24 | 0.6251  | none |
| CEP120   | 0.432  | 0.4119  | 2.3405 | 0.04216 | 0.122 | -4.24 | -0.2564 | none |
| CSNK1G1  | 0.557  | 0.4674  | 2.3401 | 0.04219 | 0.122 | -4.24 | -1.3401 | none |
| CRYBG3   | 0.388  | 0.4575  | 2.34   | 0.0422  | 0.122 | -4.24 | -0.4716 | none |
| C17ORF50 | 0.301  | 0.2393  | 2.3397 | 0.04222 | 0.122 | -4.24 | -0.2323 | none |
| FCF1     | 0.435  | 0.3335  | 2.3395 | 0.04224 | 0.122 | -4.24 | -0.846  | none |
| PHF20L1  | 0.439  | 0.456   | 2.3391 | 0.04226 | 0.122 | -4.24 | -0.5808 | none |
| C2ORF66  | 0.193  | 0.1339  | 2.3386 | 0.0423  | 0.122 | -4.24 | -0.6341 | none |
| DHX15    | 0.193  | 0.1173  | 2.3382 | 0.04233 | 0.123 | -4.24 | 0.14207 | none |
| SRD5A1   | 0.262  | 0.1532  | 2.3378 | 0.04235 | 0.123 | -4.24 | -0.0286 | none |

|         |        |         |        |         |       |       |         |            |
|---------|--------|---------|--------|---------|-------|-------|---------|------------|
| KLHL20  | -0.313 | -0.2489 | -2.338 | 0.04238 | 0.123 | -4.24 | 1.47217 | none       |
| KLF7    | 0.471  | 0.4239  | 2.3375 | 0.04238 | 0.123 | -4.24 | -0.4336 | none       |
| PHB2    | -0.282 | -0.2355 | -2.337 | 0.04244 | 0.123 | -4.24 | 2.29572 | AA-related |
| CD69    | -0.42  | -0.4215 | -2.336 | 0.04248 | 0.123 | -4.24 | 2.16656 | AA-related |
| ERV3-1  | 0.542  | 0.5276  | 2.3357 | 0.0425  | 0.123 | -4.24 | 0.03132 | none       |
| AGAP5   | 0.331  | 0.2972  | 2.3356 | 0.04251 | 0.123 | -4.24 | -0.2263 | none       |
| PM20D1  | 0.501  | 0.4297  | 2.3349 | 0.04256 | 0.123 | -4.25 | -1.175  | none       |
| PRPF8   | 0.84   | 0.8565  | 2.3347 | 0.04258 | 0.123 | -4.25 | -0.5407 | none       |
| MRPL15  | -0.26  | -0.2647 | -2.334 | 0.04259 | 0.123 | -4.25 | 1.91069 | none       |
| USP12   | -0.337 | -0.3045 | -2.334 | 0.04263 | 0.123 | -4.25 | 1.93513 | none       |
| RAD18   | 0.379  | 0.352   | 2.3337 | 0.04265 | 0.123 | -4.25 | -0.0319 | none       |
| SWAP70  | 0.461  | 0.4037  | 2.3336 | 0.04266 | 0.123 | -4.25 | -0.8178 | none       |
| GJA9    | 0.193  | 0.1544  | 2.3331 | 0.04269 | 0.123 | -4.25 | -1.1858 | none       |
| LITAF   | -0.241 | -0.2681 | -2.333 | 0.04272 | 0.123 | -4.25 | 1.76514 | none       |
| DNM1L   | 0.396  | 0.3506  | 2.332  | 0.04277 | 0.123 | -4.25 | -0.0777 | none       |
| MRPS23  | -0.309 | -0.3293 | -2.332 | 0.04279 | 0.124 | -4.25 | 0.2299  | none       |
| PSD4    | 0.522  | 0.5617  | 2.3314 | 0.04281 | 0.124 | -4.25 | -0.6228 | none       |
| CLOCK   | 0.356  | 0.3713  | 2.331  | 0.04284 | 0.124 | -4.25 | -0.5917 | none       |
| UBE2T   | -0.356 | -0.3618 | -2.331 | 0.04286 | 0.124 | -4.25 | 1.51408 | none       |
| ZNF2    | 0.205  | 0.1077  | 2.3306 | 0.04287 | 0.124 | -4.25 | -0.7748 | none       |
| DENND2D | -0.206 | -0.1991 | -2.33  | 0.04288 | 0.124 | -4.25 | 2.15668 | AA-related |
| ADAP1   | -0.493 | -0.3771 | -2.33  | 0.0429  | 0.124 | -4.25 | 1.95833 | none       |
| OCIAD2  | -0.275 | -0.3078 | -2.33  | 0.04293 | 0.124 | -4.25 | -0.1169 | none       |
| PLEKHB1 | 0.307  | 0.2833  | 2.3298 | 0.04293 | 0.124 | -4.25 | 0.06298 | none       |
| EPB41L2 | 0.753  | 0.8101  | 2.3298 | 0.04293 | 0.124 | -4.25 | -0.6191 | none       |
| POTEC   | 0.253  | 0.1792  | 2.3297 | 0.04294 | 0.124 | -4.25 | -1.234  | none       |
| SCMH1   | 0.482  | 0.488   | 2.3293 | 0.04296 | 0.124 | -4.25 | -0.2847 | none       |
| CETN3   | -0.554 | -0.4944 | -2.329 | 0.04299 | 0.124 | -4.26 | 2.32789 | AA-related |
| TNIP2   | 0.243  | 0.2804  | 2.3287 | 0.04301 | 0.124 | -4.26 | 0.017   | none       |
| TSR3    | -0.267 | -0.2203 | -2.328 | 0.04303 | 0.124 | -4.26 | 0.96883 | none       |
| UNC5CL  | 0.233  | 0.2287  | 2.3283 | 0.04303 | 0.124 | -4.26 | -0.5938 | none       |
| PRRC2B  | 0.693  | 0.8022  | 2.3283 | 0.04304 | 0.124 | -4.26 | -0.6377 | none       |
| ZNF44   | 0.34   | 0.2656  | 2.3282 | 0.04304 | 0.124 | -4.26 | -0.9563 | none       |
| MYO1D   | 0.464  | 0.3983  | 2.3272 | 0.04312 | 0.124 | -4.26 | -0.338  | none       |
| KRT86   | -0.237 | -0.2316 | -2.326 | 0.04319 | 0.124 | -4.26 | 1.32035 | none       |
| SPATA25 | -0.283 | -0.166  | -2.326 | 0.0432  | 0.124 | -4.26 | 2.23454 | AA-related |
| NPC1L1  | 0.19   | 0.1312  | 2.3257 | 0.04323 | 0.124 | -4.26 | -1.2932 | none       |
| IGF2BP3 | 0.335  | 0.247   | 2.3254 | 0.04325 | 0.124 | -4.26 | -0.7125 | none       |
| SPTY2D1 | 0.508  | 0.5174  | 2.3253 | 0.04325 | 0.124 | -4.26 | -1.1063 | none       |
| PMVK    | -0.298 | -0.2747 | -2.324 | 0.04333 | 0.125 | -4.26 | 0.92783 | none       |

|          |        |         |        |         |       |       |         |            |
|----------|--------|---------|--------|---------|-------|-------|---------|------------|
| STAB1    | -0.491 | -0.3635 | -2.324 | 0.04335 | 0.125 | -4.26 | 0.26248 | none       |
| PCDHA5   | 0.154  | 0.1097  | 2.3239 | 0.04336 | 0.125 | -4.26 | -1.1537 | none       |
| LAMTOR1  | -0.323 | -0.3062 | -2.324 | 0.04336 | 0.125 | -4.26 | 1.68373 | none       |
| MFSD11   | 0.346  | 0.1614  | 2.3237 | 0.04337 | 0.125 | -4.26 | 0.90491 | none       |
| CCDC50   | 0.45   | 0.357   | 2.3237 | 0.04337 | 0.125 | -4.26 | 0.16949 | none       |
| NGRN     | 0.229  | 0.1475  | 2.3236 | 0.04337 | 0.125 | -4.26 | -0.9715 | none       |
| C15ORF48 | -0.552 | -0.5719 | -2.323 | 0.04346 | 0.125 | -4.27 | 1.02141 | none       |
| RPL29    | -0.283 | -0.2788 | -2.322 | 0.04348 | 0.125 | -4.27 | 1.98119 | none       |
| LCN10    | -0.461 | -0.452  | -2.322 | 0.04353 | 0.125 | -4.27 | 1.28444 | none       |
| RORC     | 0.347  | 0.3244  | 2.3209 | 0.04358 | 0.125 | -4.27 | -1.2534 | none       |
| GTF3C4   | 0.313  | 0.2634  | 2.3208 | 0.04359 | 0.125 | -4.27 | -1.2465 | none       |
| ZBTB16   | 0.285  | 0.1829  | 2.3204 | 0.04361 | 0.125 | -4.27 | -1.2819 | none       |
| CHAF1A   | 0.718  | 0.8172  | 2.3201 | 0.04364 | 0.125 | -4.27 | -0.7039 | none       |
| ITGAX    | 0.534  | 0.4436  | 2.3195 | 0.04368 | 0.125 | -4.27 | -1.1215 | none       |
| PCSK5    | 0.558  | 0.5229  | 2.319  | 0.04371 | 0.125 | -4.27 | -0.0315 | none       |
| TMEM168  | 0.481  | 0.3507  | 2.3179 | 0.04379 | 0.126 | -4.27 | -0.9259 | none       |
| RPS17    | -0.442 | -0.4609 | -2.318 | 0.04382 | 0.126 | -4.27 | 2.18977 | AA-related |
| PPM1L    | 0.393  | 0.3011  | 2.3171 | 0.04386 | 0.126 | -4.27 | 0.077   | none       |
| FAM19A5  | -0.277 | -0.2176 | -2.317 | 0.04387 | 0.126 | -4.27 | 1.02254 | none       |
| SLFN11   | 0.531  | 0.4937  | 2.3168 | 0.04387 | 0.126 | -4.27 | -0.3159 | none       |
| UBL5     | -0.357 | -0.3689 | -2.317 | 0.04389 | 0.126 | -4.27 | 1.794   | none       |
| PYROXD1  | 0.404  | 0.2775  | 2.3166 | 0.04389 | 0.126 | -4.27 | -0.4137 | none       |
| RRAGC    | 0.237  | 0.1347  | 2.3147 | 0.04403 | 0.126 | -4.28 | -0.1869 | none       |
| CD86     | 0.276  | 0.2024  | 2.3146 | 0.04404 | 0.126 | -4.28 | 0.14936 | none       |
| CXXC1    | 0.402  | 0.3323  | 2.3144 | 0.04405 | 0.126 | -4.28 | -0.4959 | none       |
| DDI2     | 0.654  | 0.6585  | 2.3142 | 0.04407 | 0.126 | -4.28 | -0.3958 | none       |
| RPL23A   | -0.359 | -0.3808 | -2.314 | 0.04409 | 0.126 | -4.28 | 2.01977 | none       |
| SLC17A5  | 0.29   | 0.1309  | 2.3134 | 0.04413 | 0.126 | -4.28 | -0.8327 | none       |
| OSBPL2   | 0.361  | 0.31    | 2.312  | 0.04423 | 0.127 | -4.28 | -0.741  | none       |
| FREM2    | 0.217  | 0.1581  | 2.3106 | 0.04433 | 0.127 | -4.28 | -0.847  | none       |
| MT-ND4L  | 0.572  | 0.5939  | 2.3105 | 0.04434 | 0.127 | -4.28 | -0.4981 | none       |
| B2M      | -0.368 | -0.398  | -2.31  | 0.04441 | 0.127 | -4.29 | 1.66944 | none       |
| STX12    | -0.359 | -0.3113 | -2.31  | 0.04442 | 0.127 | -4.29 | 1.283   | none       |
| CD48     | -0.525 | -0.5547 | -2.309 | 0.04443 | 0.127 | -4.29 | 1.78837 | none       |
| NRN1     | -0.278 | -0.2647 | -2.309 | 0.04444 | 0.127 | -4.29 | 1.92254 | none       |
| AMBRA1   | 0.619  | 0.5639  | 2.3089 | 0.04446 | 0.127 | -4.29 | -1.2374 | none       |
| TTC36    | -0.278 | -0.2313 | -2.309 | 0.04448 | 0.127 | -4.29 | 1.73331 | none       |
| FSTL1    | 0.217  | 0.2306  | 2.3084 | 0.0445  | 0.127 | -4.29 | 0.90055 | none       |
| DLGAP2   | 0.28   | 0.2877  | 2.308  | 0.04453 | 0.127 | -4.29 | 0.94274 | none       |
| TMEM217  | 0.336  | 0.331   | 2.3076 | 0.04456 | 0.127 | -4.29 | 0.38995 | none       |

|          |        |         |        |         |       |       |         |            |
|----------|--------|---------|--------|---------|-------|-------|---------|------------|
| NPFFR2   | 0.159  | 0.1002  | 2.3074 | 0.04458 | 0.127 | -4.29 | -1.0935 | none       |
| NDUFB11  | -0.44  | -0.4258 | -2.307 | 0.04458 | 0.127 | -4.29 | 2.46859 | AA-related |
| EFNB1    | 0.294  | 0.2669  | 2.3072 | 0.04459 | 0.127 | -4.29 | 0.02049 | none       |
| AC240274 | 0.364  | 0.2985  | 2.3071 | 0.0446  | 0.127 | -4.29 | -0.7017 | none       |
| ACTR3B   | 0.267  | 0.1873  | 2.3071 | 0.0446  | 0.127 | -4.29 | -0.6971 | none       |
| FAM83E   | 0.606  | 0.5796  | 2.3065 | 0.04464 | 0.127 | -4.29 | 1.01796 | none       |
| LSM14A   | 0.583  | 0.4743  | 2.3063 | 0.04466 | 0.127 | -4.29 | -0.2382 | none       |
| PELP1    | 0.404  | 0.4156  | 2.3063 | 0.04466 | 0.127 | -4.29 | -0.6822 | none       |
| NKPD1    | 0.233  | 0.1682  | 2.3058 | 0.0447  | 0.127 | -4.29 | -0.9215 | none       |
| PNPLA6   | 0.45   | 0.4253  | 2.3058 | 0.0447  | 0.127 | -4.29 | -0.1424 | none       |
| UPK1A    | 0.459  | 0.3293  | 2.3057 | 0.0447  | 0.127 | -4.29 | -1.2767 | none       |
| TSPAN31  | 0.431  | 0.1575  | 2.3051 | 0.04475 | 0.128 | -4.29 | -0.6214 | none       |
| TTC7A    | 0.318  | 0.3507  | 2.304  | 0.04483 | 0.128 | -4.29 | -0.8087 | none       |
| RPL11    | -0.367 | -0.3925 | -2.304 | 0.04485 | 0.128 | -4.3  | 2.14877 | AA-related |
| SLC12A7  | 0.527  | 0.5443  | 2.3026 | 0.04493 | 0.128 | -4.3  | 0.05634 | none       |
| ZNF404   | 0.398  | 0.3195  | 2.3024 | 0.04495 | 0.128 | -4.3  | -0.8315 | none       |
| GABPB1   | 0.234  | 0.1218  | 2.3022 | 0.04497 | 0.128 | -4.3  | -0.7525 | none       |
| EDF1     | -0.227 | -0.1598 | -2.302 | 0.04501 | 0.128 | -4.3  | 1.87658 | none       |
| ERCC6    | 0.53   | 0.5283  | 2.301  | 0.04506 | 0.128 | -4.3  | 0.10929 | none       |
| MAGOH    | -0.241 | -0.2552 | -2.301 | 0.04508 | 0.128 | -4.3  | 1.27157 | none       |
| RCOR1    | 0.741  | 0.6752  | 2.2998 | 0.04515 | 0.128 | -4.3  | -0.7236 | none       |
| CDC123   | -0.292 | -0.2607 | -2.299 | 0.04517 | 0.129 | -4.3  | 1.06113 | none       |
| IER3     | 0.979  | 0.7517  | 2.2991 | 0.0452  | 0.129 | -4.3  | -1.1868 | none       |
| TMIE     | 0.291  | 0.203   | 2.2988 | 0.04523 | 0.129 | -4.3  | -0.4598 | none       |
| TTC21B   | 0.409  | 0.3673  | 2.2987 | 0.04523 | 0.129 | -4.3  | -0.7742 | none       |
| CCDC180  | 0.297  | 0.1967  | 2.2985 | 0.04525 | 0.129 | -4.3  | -1.1552 | none       |
| LMAN1L   | 0.391  | 0.2895  | 2.2983 | 0.04526 | 0.129 | -4.3  | 1.01191 | none       |
| DCAF15   | 0.374  | 0.3988  | 2.298  | 0.04529 | 0.129 | -4.3  | 0.25564 | none       |
| INTS6    | 0.576  | 0.5177  | 2.2978 | 0.0453  | 0.129 | -4.3  | -0.3122 | none       |
| RHNO1    | 0.283  | 0.1582  | 2.2972 | 0.04535 | 0.129 | -4.31 | -1.0183 | none       |
| TMEM136  | 0.305  | 0.1882  | 2.2969 | 0.04537 | 0.129 | -4.31 | -0.0792 | none       |
| CAMK4    | 0.285  | 0.1892  | 2.2967 | 0.04538 | 0.129 | -4.31 | -0.0805 | none       |
| ZNF226   | 0.512  | 0.3527  | 2.2962 | 0.04542 | 0.129 | -4.31 | -0.9128 | none       |
| UQCRB    | -0.318 | -0.3411 | -2.295 | 0.04548 | 0.129 | -4.31 | 1.67846 | none       |
| NARS     | 0.265  | 0.2396  | 2.2951 | 0.04551 | 0.129 | -4.31 | 0.38499 | none       |
| BCR      | 0.578  | 0.5983  | 2.295  | 0.04551 | 0.129 | -4.31 | -0.4059 | none       |
| TJAP1    | 0.364  | 0.3456  | 2.295  | 0.04551 | 0.129 | -4.31 | -1.0106 | none       |
| MLF2     | -0.262 | -0.1964 | -2.295 | 0.04552 | 0.129 | -4.31 | 1.41537 | none       |
| SCTR     | 0.311  | 0.2834  | 2.2948 | 0.04553 | 0.129 | -4.31 | -0.0461 | none       |
| SKA3     | 0.311  | 0.2182  | 2.2945 | 0.04555 | 0.129 | -4.31 | -0.3534 | none       |



|           |        |         |        |         |       |       |         |      |
|-----------|--------|---------|--------|---------|-------|-------|---------|------|
| ZGLP1     | -0.262 | -0.2052 | -2.294 | 0.04556 | 0.129 | -4.31 | 0.34635 | none |
| CLEC19A   | 0.31   | 0.2528  | 2.2943 | 0.04557 | 0.129 | -4.31 | -1.003  | none |
| FBXO10    | 0.42   | 0.4788  | 2.2937 | 0.04561 | 0.129 | -4.31 | 0.40548 | none |
| GNPTAB    | 0.616  | 0.6434  | 2.2932 | 0.04565 | 0.129 | -4.31 | 0.21222 | none |
| SAP30L    | -0.561 | -0.3515 | -2.293 | 0.04569 | 0.129 | -4.31 | 1.34641 | none |
| ALOX5AP   | -0.575 | -0.6532 | -2.293 | 0.0457  | 0.129 | -4.31 | 1.44181 | none |
| NSUN4     | 0.226  | 0.1391  | 2.2922 | 0.04573 | 0.13  | -4.31 | -0.9685 | none |
| TULP1     | 0.285  | 0.2678  | 2.291  | 0.04582 | 0.13  | -4.32 | -0.4496 | none |
| SLC4A1AP  | 0.54   | 0.5405  | 2.2908 | 0.04584 | 0.13  | -4.32 | -0.5039 | none |
| GTF2H1    | 0.545  | 0.5311  | 2.2905 | 0.04586 | 0.13  | -4.32 | -0.572  | none |
| LY6G5C    | 0.496  | 0.1655  | 2.2901 | 0.04589 | 0.13  | -4.32 | -0.3458 | none |
| SRRM2     | 0.576  | 0.6879  | 2.2901 | 0.04589 | 0.13  | -4.32 | -0.4187 | none |
| RARRES3   | -0.411 | -0.5046 | -2.29  | 0.04591 | 0.13  | -4.32 | 1.35517 | none |
| RASGRF1   | 0.28   | 0.1652  | 2.2898 | 0.04591 | 0.13  | -4.32 | -1.1894 | none |
| VPS33B    | 0.379  | 0.248   | 2.2888 | 0.04599 | 0.13  | -4.32 | -1.207  | none |
| PAXBP1    | 0.603  | 0.5533  | 2.2881 | 0.04605 | 0.13  | -4.32 | -0.9101 | none |
| RPL27     | -0.434 | -0.444  | -2.288 | 0.04605 | 0.13  | -4.32 | 1.43587 | none |
| ZBTB33    | -0.243 | -0.1649 | -2.288 | 0.04608 | 0.13  | -4.32 | 2.06762 | none |
| GLRX      | -0.316 | -0.3811 | -2.288 | 0.04609 | 0.13  | -4.32 | 1.23497 | none |
| KAT2B     | 0.502  | 0.5097  | 2.2875 | 0.04609 | 0.13  | -4.32 | -0.83   | none |
| PLD3      | 0.313  | 0.3072  | 2.2864 | 0.04618 | 0.131 | -4.32 | -1.0069 | none |
| TAF1D     | 0.545  | 0.4435  | 2.2862 | 0.04619 | 0.131 | -4.32 | -1.0973 | none |
| FAM135B   | 0.545  | 0.3474  | 2.2861 | 0.0462  | 0.131 | -4.32 | -1.0905 | none |
| ATP6V0E1  | -0.366 | -0.4037 | -2.286 | 0.04621 | 0.131 | -4.32 | 1.74027 | none |
| SLC38A1   | 0.199  | 0.1523  | 2.2854 | 0.04626 | 0.131 | -4.32 | -0.3845 | none |
| RC3H2     | 0.369  | 0.382   | 2.2851 | 0.04628 | 0.131 | -4.32 | -0.0116 | none |
| EIF4ENIF1 | 0.482  | 0.5014  | 2.2849 | 0.04629 | 0.131 | -4.33 | -0.4929 | none |
| PPRC1     | 0.511  | 0.5791  | 2.2849 | 0.04629 | 0.131 | -4.33 | -0.1978 | none |
| ZNF286A   | 0.363  | 0.3458  | 2.2848 | 0.0463  | 0.131 | -4.33 | 0.04248 | none |
| CIZ1      | 0.66   | 0.7972  | 2.2843 | 0.04634 | 0.131 | -4.33 | -0.2512 | none |
| PAMR1     | 0.16   | 0.0961  | 2.2842 | 0.04635 | 0.131 | -4.33 | -1.2401 | none |
| ROCK2     | 0.58   | 0.6035  | 2.2839 | 0.04637 | 0.131 | -4.33 | -0.8693 | none |
| LATS1     | 0.457  | 0.4615  | 2.2828 | 0.04646 | 0.131 | -4.33 | -0.94   | none |
| VDAC2     | -0.258 | -0.2449 | -2.283 | 0.04646 | 0.131 | -4.33 | 1.82438 | none |
| PPA1      | -0.269 | -0.2938 | -2.283 | 0.04646 | 0.131 | -4.33 | 1.58217 | none |
| NUTF2     | -0.337 | -0.3447 | -2.282 | 0.04648 | 0.131 | -4.33 | 1.78654 | none |
| CPSF2     | 0.385  | 0.34    | 2.2823 | 0.04649 | 0.131 | -4.33 | -1.4069 | none |
| KCTD17    | -0.532 | -0.3528 | -2.282 | 0.04652 | 0.131 | -4.33 | 1.01692 | none |
| OR4K2     | 0.226  | 0.1654  | 2.281  | 0.0466  | 0.131 | -4.33 | -0.9166 | none |
| OAZ3      | 0.353  | 0.2469  | 2.2805 | 0.04664 | 0.131 | -4.33 | -0.1078 | none |

|          |        |         |        |         |       |       |         |            |
|----------|--------|---------|--------|---------|-------|-------|---------|------------|
| C8ORF58  | -0.324 | -0.2423 | -2.28  | 0.04667 | 0.131 | -4.33 | 2.18293 | AA-related |
| JRK      | 0.311  | 0.3472  | 2.2801 | 0.04667 | 0.131 | -4.33 | -0.1412 | none       |
| SLC25A13 | 0.212  | 0.1301  | 2.2798 | 0.04669 | 0.131 | -4.33 | -0.2125 | none       |
| PARVB    | 0.27   | 0.232   | 2.2795 | 0.04671 | 0.132 | -4.33 | -0.5943 | none       |
| TEX14    | 0.18   | 0.1701  | 2.2794 | 0.04672 | 0.132 | -4.33 | 0.74825 | none       |
| LAX1     | 0.604  | 0.6055  | 2.2792 | 0.04674 | 0.132 | -4.33 | -0.9277 | none       |
| RIPK2    | 0.242  | 0.2222  | 2.2791 | 0.04675 | 0.132 | -4.33 | -0.1937 | none       |
| HRH1     | 0.287  | 0.2529  | 2.2786 | 0.04678 | 0.132 | -4.34 | -0.8663 | none       |
| CCDC127  | 0.533  | 0.5036  | 2.2785 | 0.0468  | 0.132 | -4.34 | 0.01795 | none       |
| CLEC2D   | 0.338  | 0.2661  | 2.2784 | 0.0468  | 0.132 | -4.34 | -1.1251 | none       |
| PPID     | 0.214  | 0.1523  | 2.2783 | 0.04681 | 0.132 | -4.34 | -1.1089 | none       |
| ZNF33A   | 0.503  | 0.4619  | 2.2782 | 0.04682 | 0.132 | -4.34 | -1.0096 | none       |
| UBE2V2   | 0.223  | 0.1697  | 2.2781 | 0.04683 | 0.132 | -4.34 | -1.1424 | none       |
| CEP95    | 0.521  | 0.4637  | 2.278  | 0.04683 | 0.132 | -4.34 | -1.2236 | none       |
| PSMD10   | -0.323 | -0.298  | -2.278 | 0.04683 | 0.132 | -4.34 | 1.58402 | none       |
| GCNT2    | 0.706  | 0.5528  | 2.278  | 0.04683 | 0.132 | -4.34 | -1.2436 | none       |
| ZNF287   | 0.38   | 0.3863  | 2.2779 | 0.04684 | 0.132 | -4.34 | 0.21342 | none       |
| ATG12    | 0.269  | 0.1326  | 2.2777 | 0.04686 | 0.132 | -4.34 | -0.9952 | none       |
| WDR35    | 0.291  | 0.2722  | 2.2777 | 0.04686 | 0.132 | -4.34 | -1.161  | none       |
| AKR1C1   | 0.466  | 0.244   | 2.2775 | 0.04687 | 0.132 | -4.34 | -0.806  | none       |
| TSGA10IP | 0.313  | 0.285   | 2.277  | 0.04691 | 0.132 | -4.34 | -0.8502 | none       |
| RIF1     | 0.756  | 0.7955  | 2.2769 | 0.04691 | 0.132 | -4.34 | -0.1135 | none       |
| ARHGEF1  | 0.397  | 0.3958  | 2.2766 | 0.04694 | 0.132 | -4.34 | -0.2016 | none       |
| PAXIP1   | 0.434  | 0.4245  | 2.2761 | 0.04698 | 0.132 | -4.34 | -0.8554 | none       |
| CIT      | 0.413  | 0.4394  | 2.276  | 0.04699 | 0.132 | -4.34 | -0.6897 | none       |
| FLT3LG   | 0.363  | 0.2331  | 2.2756 | 0.04702 | 0.132 | -4.34 | -1.01   | none       |
| CCND2    | 0.272  | 0.2558  | 2.2743 | 0.04713 | 0.132 | -4.34 | -0.1692 | none       |
| CYP3A7   | -0.273 | -0.2353 | -2.274 | 0.04715 | 0.132 | -4.34 | 1.93614 | none       |
| ARHGAP2  | 0.682  | 0.6866  | 2.2734 | 0.0472  | 0.132 | -4.34 | -0.9505 | none       |
| SETD5    | 0.56   | 0.6327  | 2.2733 | 0.04721 | 0.132 | -4.34 | -0.0862 | none       |
| ARHGEF2  | 0.421  | 0.4755  | 2.2732 | 0.04721 | 0.132 | -4.34 | -0.3122 | none       |
| PRKG2    | 0.314  | 0.2347  | 2.2732 | 0.04721 | 0.132 | -4.34 | -0.2091 | none       |
| TAPBP    | 0.488  | 0.5102  | 2.2731 | 0.04722 | 0.132 | -4.34 | 1.35147 | none       |
| GCFC2    | 0.219  | 0.1883  | 2.2724 | 0.04727 | 0.132 | -4.34 | -0.2028 | none       |
| SNRNP20C | 0.543  | 0.5684  | 2.2724 | 0.04728 | 0.132 | -4.35 | -0.805  | none       |
| SYBU     | 0.2    | 0.1557  | 2.2722 | 0.04729 | 0.132 | -4.35 | -1.3847 | none       |
| MAPK11   | -0.225 | -0.1053 | -2.272 | 0.04731 | 0.132 | -4.35 | 1.05848 | none       |
| PARP9    | 0.373  | 0.3335  | 2.2715 | 0.04735 | 0.133 | -4.35 | -0.4977 | none       |
| JRKL     | 0.223  | 0.19    | 2.2712 | 0.04737 | 0.133 | -4.35 | 0.50541 | none       |
| SNRNP48  | -0.433 | -0.3226 | -2.271 | 0.04739 | 0.133 | -4.35 | 2.05542 | none       |

|          |        |         |        |         |       |       |         |      |
|----------|--------|---------|--------|---------|-------|-------|---------|------|
| C2ORF81  | 0.32   | 0.2076  | 2.2708 | 0.0474  | 0.133 | -4.35 | -0.1974 | none |
| ACAD9    | 0.259  | 0.2351  | 2.2706 | 0.04742 | 0.133 | -4.35 | 0.13857 | none |
| DNAJC13  | 0.723  | 0.7164  | 2.2704 | 0.04743 | 0.133 | -4.35 | -0.871  | none |
| RALGPS1  | 0.374  | 0.2498  | 2.2704 | 0.04744 | 0.133 | -4.35 | -0.0256 | none |
| IL33     | -0.175 | -0.0372 | -2.27  | 0.04745 | 0.133 | -4.35 | 0.86454 | none |
| GCSAM    | -0.179 | -0.1643 | -2.27  | 0.04745 | 0.133 | -4.35 | 0.79419 | none |
| CDK11A   | 0.497  | 0.5038  | 2.2702 | 0.04745 | 0.133 | -4.35 | -0.6063 | none |
| KAT5     | 0.374  | 0.3589  | 2.27   | 0.04746 | 0.133 | -4.35 | -0.6932 | none |
| GNPAT    | -0.191 | -0.1676 | -2.269 | 0.04751 | 0.133 | -4.35 | 1.74804 | none |
| EFCAB10  | 0.316  | 0.2142  | 2.2692 | 0.04753 | 0.133 | -4.35 | -0.3218 | none |
| RNF6     | 0.554  | 0.512   | 2.2691 | 0.04754 | 0.133 | -4.35 | -0.4431 | none |
| PLCG1    | 0.555  | 0.5968  | 2.2684 | 0.0476  | 0.133 | -4.35 | -0.3748 | none |
| SREBF2   | 0.47   | 0.5472  | 2.2682 | 0.04761 | 0.133 | -4.35 | 0.36208 | none |
| MVB12A   | 0.356  | 0.2402  | 2.2677 | 0.04765 | 0.133 | -4.35 | -0.5977 | none |
| IRX5     | 0.238  | 0.2102  | 2.2674 | 0.04768 | 0.133 | -4.35 | 0.42933 | none |
| KCNT1    | 0.426  | 0.2735  | 2.2673 | 0.04768 | 0.133 | -4.35 | 0.05188 | none |
| LINGO4   | 0.165  | 0.1376  | 2.2667 | 0.04773 | 0.133 | -4.35 | -0.5289 | none |
| DNHD1    | 0.368  | 0.3902  | 2.2666 | 0.04774 | 0.133 | -4.35 | -0.4672 | none |
| RASA4    | 0.495  | 0.4632  | 2.2666 | 0.04774 | 0.133 | -4.35 | -1.0763 | none |
| SERPINH1 | 0.395  | 0.3744  | 2.2666 | 0.04774 | 0.133 | -4.35 | -0.7077 | none |
| RPS11    | -0.406 | -0.4204 | -2.266 | 0.04776 | 0.133 | -4.35 | 1.54988 | none |
| FAM98A   | 0.357  | 0.332   | 2.2662 | 0.04777 | 0.133 | -4.35 | -0.5402 | none |
| TMEM161  | 0.501  | 0.3967  | 2.2658 | 0.0478  | 0.133 | -4.36 | -0.8238 | none |
| CCDC28A  | -0.246 | -0.2739 | -2.265 | 0.04785 | 0.133 | -4.36 | 0.95363 | none |
| HADH     | -0.221 | -0.2176 | -2.265 | 0.04789 | 0.133 | -4.36 | 1.62977 | none |
| SH3BGRL3 | -0.288 | -0.2728 | -2.264 | 0.04792 | 0.134 | -4.36 | 1.61905 | none |
| SLC16A10 | 0.464  | 0.2901  | 2.2642 | 0.04793 | 0.134 | -4.36 | -0.9982 | none |
| BTBD11   | 0.281  | 0.2217  | 2.2637 | 0.04797 | 0.134 | -4.36 | -1.0129 | none |
| ANKZF1   | 0.38   | 0.3512  | 2.2627 | 0.04805 | 0.134 | -4.36 | -0.9459 | none |
| IRAK3    | 0.274  | 0.2061  | 2.2624 | 0.04807 | 0.134 | -4.36 | -0.6312 | none |
| LCN12    | 0.329  | 0.1693  | 2.2624 | 0.04808 | 0.134 | -4.36 | 1.21385 | none |
| ZNF395   | 0.32   | 0.2951  | 2.2621 | 0.0481  | 0.134 | -4.36 | -0.045  | none |
| NBPF14   | 0.432  | 0.4727  | 2.2618 | 0.04812 | 0.134 | -4.36 | -0.3496 | none |
| ATOX1    | -0.275 | -0.283  | -2.261 | 0.04817 | 0.134 | -4.36 | 1.97404 | none |
| AC129492 | 0.391  | 0.2907  | 2.2611 | 0.04818 | 0.134 | -4.36 | -0.825  | none |
| GZMH     | -0.311 | -0.1905 | -2.261 | 0.04821 | 0.134 | -4.36 | 1.81884 | none |
| CD68     | 0.334  | 0.2568  | 2.2604 | 0.04824 | 0.134 | -4.36 | -0.9552 | none |
| BACH2    | 0.356  | 0.3988  | 2.2603 | 0.04824 | 0.134 | -4.36 | 0.06656 | none |
| TAF3     | 0.595  | 0.666   | 2.2598 | 0.04829 | 0.134 | -4.37 | -1.0229 | none |
| C1GALT1C | -0.244 | -0.2834 | -2.259 | 0.04831 | 0.134 | -4.37 | 0.88864 | none |

|          |        |         |        |         |       |       |         |      |
|----------|--------|---------|--------|---------|-------|-------|---------|------|
| FAM155A  | 0.167  | 0.1211  | 2.2587 | 0.04838 | 0.134 | -4.37 | -1.3455 | none |
| FAM32A   | 0.261  | 0.2069  | 2.2586 | 0.04838 | 0.134 | -4.37 | -1.3329 | none |
| IQCB1    | 0.271  | 0.1777  | 2.2585 | 0.04839 | 0.134 | -4.37 | -0.5081 | none |
| FBXL14   | -0.276 | -0.1656 | -2.258 | 0.04844 | 0.135 | -4.37 | 1.8118  | none |
| ITGB7    | -0.301 | -0.2704 | -2.258 | 0.04845 | 0.135 | -4.37 | 1.22012 | none |
| WDR33    | 0.351  | 0.2757  | 2.2577 | 0.04846 | 0.135 | -4.37 | -0.249  | none |
| DAD1     | -0.394 | -0.4063 | -2.258 | 0.04847 | 0.135 | -4.37 | 1.73605 | none |
| BCL10    | 0.256  | 0.0927  | 2.2568 | 0.04852 | 0.135 | -4.37 | -1.2258 | none |
| HACD1    | 0.318  | 0.2157  | 2.2568 | 0.04853 | 0.135 | -4.37 | 0.5597  | none |
| DNMT1    | 0.789  | 0.8312  | 2.2565 | 0.04855 | 0.135 | -4.37 | -0.7101 | none |
| GATAD2B  | 0.752  | 0.7205  | 2.2562 | 0.04858 | 0.135 | -4.37 | -0.199  | none |
| CHMP3    | -0.259 | -0.2802 | -2.256 | 0.04859 | 0.135 | -4.37 | 0.59797 | none |
| ANKK1    | -0.193 | -0.1856 | -2.256 | 0.04863 | 0.135 | -4.37 | 0.06743 | none |
| DIDO1    | 0.32   | 0.3597  | 2.254  | 0.04875 | 0.135 | -4.37 | -0.0576 | none |
| SPRY4    | -0.259 | -0.2054 | -2.254 | 0.04877 | 0.135 | -4.37 | 0.86393 | none |
| FRAT1    | -0.223 | -0.1759 | -2.254 | 0.04877 | 0.135 | -4.37 | 0.83633 | none |
| GSTA4    | -0.531 | -0.4749 | -2.254 | 0.04879 | 0.135 | -4.37 | 2.02489 | none |
| TAOK3    | 0.716  | 0.6989  | 2.2533 | 0.04881 | 0.135 | -4.38 | -0.9193 | none |
| FAM209A  | 0.31   | 0.2839  | 2.2527 | 0.04886 | 0.135 | -4.38 | 0.02313 | none |
| ASPHD2   | -0.194 | -0.1156 | -2.252 | 0.04891 | 0.136 | -4.38 | 0.99364 | none |
| SLC22A31 | 0.291  | 0.2555  | 2.2511 | 0.04899 | 0.136 | -4.38 | 0.84284 | none |
| INO80    | 0.546  | 0.6142  | 2.2509 | 0.04901 | 0.136 | -4.38 | -0.4259 | none |
| RPL38    | -0.437 | -0.456  | -2.251 | 0.04901 | 0.136 | -4.38 | 1.48837 | none |
| CDK12    | 0.82   | 0.888   | 2.2502 | 0.04907 | 0.136 | -4.38 | -0.866  | none |
| CTU2     | -0.257 | -0.2    | -2.25  | 0.04907 | 0.136 | -4.38 | 0.45889 | none |
| STAG1    | 0.561  | 0.465   | 2.249  | 0.04917 | 0.136 | -4.38 | -0.8895 | none |
| ZFYVE21  | 0.285  | 0.1774  | 2.2487 | 0.04919 | 0.136 | -4.38 | -0.9098 | none |
| ETAA1    | 0.416  | 0.4114  | 2.2487 | 0.04919 | 0.136 | -4.38 | -0.7946 | none |
| C11ORF21 | 0.482  | 0.4126  | 2.2485 | 0.04921 | 0.136 | -4.38 | 0.03483 | none |
| GMCL1    | 0.197  | 0.1448  | 2.2485 | 0.04921 | 0.136 | -4.38 | -0.9168 | none |
| SCARF2   | 0.235  | 0.2073  | 2.2485 | 0.04921 | 0.136 | -4.38 | -1.0789 | none |
| DLGAP1   | 0.738  | 0.5794  | 2.2481 | 0.04924 | 0.136 | -4.38 | -0.7413 | none |
| HMGB2    | -0.2   | -0.1311 | -2.247 | 0.0493  | 0.136 | -4.38 | 0.80545 | none |
| OR2M3    | 0.169  | 0.1353  | 2.2468 | 0.04934 | 0.136 | -4.39 | -1.0122 | none |
| SPATA5   | 0.363  | 0.3269  | 2.2468 | 0.04934 | 0.136 | -4.39 | -0.8848 | none |
| BPTF     | 0.745  | 0.7741  | 2.2465 | 0.04937 | 0.136 | -4.39 | -0.9219 | none |
| UBE2A    | 0.276  | 0.1019  | 2.2463 | 0.04939 | 0.136 | -4.39 | -0.5362 | none |
| ARAP1    | 0.459  | 0.485   | 2.2456 | 0.04945 | 0.137 | -4.39 | -0.673  | none |
| CGB5     | 0.35   | 0.3007  | 2.2456 | 0.04945 | 0.137 | -4.39 | 0.22393 | none |
| IGLL1    | -0.234 | -0.1578 | -2.245 | 0.04948 | 0.137 | -4.39 | 1.28261 | none |

|                      |        |         |        |         |       |       |         |            |
|----------------------|--------|---------|--------|---------|-------|-------|---------|------------|
| RPL37                | -0.426 | -0.4313 | -2.245 | 0.04948 | 0.137 | -4.39 | 1.0285  | none       |
| ARHGAP4 <sup>!</sup> | 0.441  | 0.4716  | 2.245  | 0.04949 | 0.137 | -4.39 | 0.05421 | none       |
| LACTB2               | -0.348 | -0.3252 | -2.244 | 0.04956 | 0.137 | -4.39 | 1.77859 | none       |
| HCN1                 | 0.178  | 0.1295  | 2.2439 | 0.04959 | 0.137 | -4.39 | 0.11626 | none       |
| ZNF547               | 0.589  | 0.4574  | 2.2438 | 0.04959 | 0.137 | -4.39 | -0.84   | none       |
| SGTA                 | 0.291  | 0.2625  | 2.2429 | 0.04967 | 0.137 | -4.39 | -1.1161 | none       |
| MGAT3                | 0.286  | 0.1548  | 2.2427 | 0.04969 | 0.137 | -4.39 | -0.4054 | none       |
| MGAT4C               | 0.177  | 0.1346  | 2.2423 | 0.04972 | 0.137 | -4.39 | -0.7897 | none       |
| SLC25A28             | 0.423  | 0.3953  | 2.2423 | 0.04972 | 0.137 | -4.39 | -0.147  | none       |
| RTEL1                | 0.517  | 0.5174  | 2.2419 | 0.04975 | 0.137 | -4.39 | -0.768  | none       |
| UBE2L3               | -0.157 | -0.1411 | -2.242 | 0.04976 | 0.137 | -4.39 | 0.50333 | none       |
| SRRM1                | 0.791  | 0.826   | 2.2413 | 0.0498  | 0.137 | -4.39 | -0.7741 | none       |
| SNU13                | -0.348 | -0.3362 | -2.241 | 0.04985 | 0.137 | -4.4  | 2.05858 | none       |
| THAP12               | 0.213  | 0.1637  | 2.2407 | 0.04986 | 0.137 | -4.4  | 0.75159 | none       |
| RBM4                 | 0.342  | 0.1854  | 2.2404 | 0.04988 | 0.137 | -4.4  | -0.7694 | none       |
| PPP1R11              | -0.542 | -0.5153 | -2.24  | 0.04988 | 0.137 | -4.4  | 1.48913 | none       |
| HSPB6                | -0.253 | -0.2383 | -2.24  | 0.04992 | 0.137 | -4.4  | 2.05245 | none       |
| SCN2B                | 0.251  | 0.1928  | 2.2399 | 0.04992 | 0.137 | -4.4  | -1.1571 | none       |
| BBC3                 | -0.25  | -0.1486 | -2.24  | 0.04992 | 0.137 | -4.4  | 1.97594 | none       |
| GARNL3               | 0.368  | 0.311   | 2.2397 | 0.04994 | 0.137 | -4.4  | 0.31431 | none       |
| LSM2                 | -0.558 | -0.5689 | -2.239 | 0.04999 | 0.138 | -4.4  | 2.03818 | none       |
| GIT2                 | 0.387  | 0.3668  | 2.2387 | 0.05002 | 0.138 | -4.4  | 0.12884 | none       |
| SLC44A4              | 0.203  | 0.1377  | 2.2385 | 0.05004 | 0.138 | -4.4  | -0.9486 | none       |
| ARHGEF37             | 0.669  | 0.5119  | 2.2384 | 0.05005 | 0.138 | -4.4  | -0.2718 | none       |
| RB1CC1               | 0.78   | 0.739   | 2.2376 | 0.05012 | 0.138 | -4.4  | -0.4107 | none       |
| TOM1L1               | 0.801  | 0.6877  | 2.2376 | 0.05012 | 0.138 | -4.4  | -1.0057 | none       |
| MYO9B                | 0.652  | 0.7497  | 2.2375 | 0.05012 | 0.138 | -4.4  | -0.7184 | none       |
| PCMT1                | -0.28  | -0.2752 | -2.237 | 0.05016 | 0.138 | -4.4  | 1.49921 | none       |
| 2-Mar                | 0.32   | 0.1716  | 2.237  | 0.05016 | 0.138 | -4.4  | -0.6192 | none       |
| NUAK2                | 0.399  | 0.3206  | 2.2369 | 0.05018 | 0.138 | -4.4  | -0.4956 | none       |
| NIPAL2               | 0.513  | 0.4709  | 2.2359 | 0.05025 | 0.138 | -4.4  | 0.22424 | none       |
| LARS                 | 0.476  | 0.389   | 2.2359 | 0.05026 | 0.138 | -4.4  | -1.1247 | none       |
| CGRRF1               | 0.371  | 0.2171  | 2.2354 | 0.0503  | 0.138 | -4.4  | -0.017  | none       |
| RBM44                | 0.159  | 0.1063  | 2.2354 | 0.0503  | 0.138 | -4.4  | -0.4434 | none       |
| ZNF879               | 0.367  | 0.3233  | 2.2349 | 0.05034 | 0.138 | -4.4  | 0.06989 | none       |
| WDR66                | 0.534  | 0.2973  | 2.2348 | 0.05035 | 0.138 | -4.4  | -1.0526 | none       |
| JAKMIP2              | 0.396  | 0.3497  | 2.234  | 0.05042 | 0.138 | -4.41 | -1.0111 | none       |
| EIF1                 | -0.294 | -0.2832 | -2.233 | 0.05049 | 0.139 | -4.41 | 2.20311 | AA-related |
| EPHB1                | -0.269 | -0.1958 | -2.233 | 0.05051 | 0.139 | -4.41 | 0.53566 | none       |
| CD63                 | -0.485 | -0.4778 | -2.233 | 0.05053 | 0.139 | -4.41 | 1.95637 | none       |

|          |        |         |        |         |       |       |         |      |
|----------|--------|---------|--------|---------|-------|-------|---------|------|
| FYTTD1   | 0.259  | 0.1654  | 2.2319 | 0.05059 | 0.139 | -4.41 | -0.6457 | none |
| RADIL    | 0.268  | 0.211   | 2.2311 | 0.05066 | 0.139 | -4.41 | -1.0509 | none |
| TIAM1    | 0.373  | 0.3608  | 2.2306 | 0.05071 | 0.139 | -4.41 | -0.1734 | none |
| CCL3L1   | 0.33   | 0.2535  | 2.2305 | 0.05071 | 0.139 | -4.41 | -0.483  | none |
| MRPL12   | -0.233 | -0.1805 | -2.231 | 0.05071 | 0.139 | -4.41 | 1.80947 | none |
| APOA2    | 0.335  | 0.2141  | 2.2303 | 0.05073 | 0.139 | -4.41 | -1.171  | none |
| ZMAT1    | 0.264  | 0.179   | 2.2301 | 0.05075 | 0.139 | -4.41 | -1.1123 | none |
| CHID1    | 0.198  | 0.1513  | 2.2291 | 0.05083 | 0.139 | -4.41 | 0.00898 | none |
| CBX1     | 0.425  | 0.4055  | 2.2284 | 0.0509  | 0.139 | -4.41 | -0.2704 | none |
| GDI2     | -0.197 | -0.2227 | -2.227 | 0.051   | 0.14  | -4.42 | 1.4341  | none |
| POLG     | 0.472  | 0.5864  | 2.2271 | 0.05101 | 0.14  | -4.42 | 0.85772 | none |
| FMN2     | 0.21   | 0.1507  | 2.2269 | 0.05102 | 0.14  | -4.42 | -1.3561 | none |
| EIF2S1   | -0.379 | -0.2919 | -2.227 | 0.05104 | 0.14  | -4.42 | 1.72691 | none |
| ZNF827   | 0.609  | 0.5773  | 2.2259 | 0.05111 | 0.14  | -4.42 | -0.8422 | none |
| ETV1     | 0.325  | 0.2756  | 2.2251 | 0.05118 | 0.14  | -4.42 | 0.49054 | none |
| HOMER2   | 0.568  | 0.558   | 2.225  | 0.05118 | 0.14  | -4.42 | 0.04145 | none |
| FBXO9    | 0.365  | 0.2861  | 2.2245 | 0.05122 | 0.14  | -4.42 | -0.8914 | none |
| SMAD4    | 0.223  | 0.1758  | 2.2243 | 0.05124 | 0.14  | -4.42 | 0.88021 | none |
| CD70     | 0.36   | 0.2058  | 2.2243 | 0.05124 | 0.14  | -4.42 | -0.4521 | none |
| PRPF38B  | 0.544  | 0.6022  | 2.2241 | 0.05126 | 0.14  | -4.42 | -0.4242 | none |
| MANEA    | 0.164  | 0.0606  | 2.224  | 0.05127 | 0.14  | -4.42 | 1.10803 | none |
| GRHL1    | 0.334  | 0.2647  | 2.2238 | 0.05129 | 0.14  | -4.42 | -0.1768 | none |
| CC2D1A   | 0.566  | 0.5999  | 2.2237 | 0.0513  | 0.14  | -4.42 | -1.065  | none |
| CDC20    | -0.26  | -0.2001 | -2.223 | 0.05135 | 0.14  | -4.42 | 1.85394 | none |
| ZFP37    | 0.273  | 0.1889  | 2.2231 | 0.05135 | 0.14  | -4.42 | -0.6505 | none |
| CYP24A1  | 0.424  | 0.4091  | 2.2229 | 0.05136 | 0.14  | -4.42 | 1.4577  | none |
| C11ORF88 | 0.287  | 0.1633  | 2.2229 | 0.05137 | 0.14  | -4.42 | -0.5738 | none |
| ARMC6    | 0.254  | 0.1761  | 2.2226 | 0.05139 | 0.14  | -4.42 | 0.05932 | none |
| HSPE1    | -0.303 | -0.2945 | -2.222 | 0.05142 | 0.14  | -4.42 | 2.01868 | none |
| RMND5A   | 0.334  | 0.2719  | 2.2206 | 0.05156 | 0.141 | -4.43 | -0.8254 | none |
| APOL3    | 0.385  | 0.3578  | 2.2205 | 0.05157 | 0.141 | -4.43 | -0.2726 | none |
| ARHGAP17 | 0.652  | 0.6682  | 2.2199 | 0.05162 | 0.141 | -4.43 | 0.03365 | none |
| PSMB3    | -0.365 | -0.3462 | -2.22  | 0.05164 | 0.141 | -4.43 | 1.75987 | none |
| FAM169A  | 0.442  | 0.3619  | 2.2195 | 0.05166 | 0.141 | -4.43 | 0.22005 | none |
| ZSCAN4   | 0.262  | 0.1914  | 2.2192 | 0.05168 | 0.141 | -4.43 | -1.4252 | none |
| DUS3L    | 0.224  | 0.1812  | 2.2189 | 0.05171 | 0.141 | -4.43 | 0.10018 | none |
| RNASEK   | -0.422 | -0.4236 | -2.219 | 0.05172 | 0.141 | -4.43 | 2.07841 | none |
| NEK11    | -0.213 | -0.1797 | -2.217 | 0.05186 | 0.141 | -4.43 | 1.0309  | none |
| SLC5A1   | 0.178  | 0.1383  | 2.2171 | 0.05186 | 0.141 | -4.43 | -1.0596 | none |
| FASN     | 0.435  | 0.5677  | 2.217  | 0.05187 | 0.141 | -4.43 | -0.0873 | none |

|          |        |         |        |         |       |       |         |            |
|----------|--------|---------|--------|---------|-------|-------|---------|------------|
| SERPIND1 | 0.166  | 0.1125  | 2.2166 | 0.05191 | 0.142 | -4.43 | -0.5639 | none       |
| NRK      | 0.161  | 0.1057  | 2.2161 | 0.05195 | 0.142 | -4.43 | -1.3177 | none       |
| SLC35F2  | 0.293  | 0.2027  | 2.216  | 0.05196 | 0.142 | -4.43 | -1.2177 | none       |
| CAND1    | 0.295  | 0.2815  | 2.2156 | 0.052   | 0.142 | -4.43 | -0.358  | none       |
| APPL1    | 0.222  | 0.1023  | 2.2151 | 0.05204 | 0.142 | -4.44 | 0.49672 | none       |
| TMEM139  | 0.294  | 0.2818  | 2.2149 | 0.05206 | 0.142 | -4.44 | -1.2825 | none       |
| ACAP2    | 0.352  | 0.3437  | 2.2146 | 0.05208 | 0.142 | -4.44 | 0.2294  | none       |
| ATP13A5  | 0.446  | 0.3201  | 2.2146 | 0.05208 | 0.142 | -4.44 | -0.8482 | none       |
| CDK5RAP3 | 0.233  | 0.2297  | 2.2143 | 0.05211 | 0.142 | -4.44 | -1.0816 | none       |
| BCKDHA   | 0.258  | 0.227   | 2.2143 | 0.05211 | 0.142 | -4.44 | 0.1799  | none       |
| DNAJB1   | 0.261  | 0.1851  | 2.2133 | 0.05219 | 0.142 | -4.44 | -1.2616 | none       |
| TMEM59   | -0.343 | -0.4002 | -2.213 | 0.0522  | 0.142 | -4.44 | 0.88809 | none       |
| ABCA3    | 0.356  | 0.272   | 2.213  | 0.05222 | 0.142 | -4.44 | -1.0246 | none       |
| DOCK4    | 0.333  | 0.2369  | 2.213  | 0.05222 | 0.142 | -4.44 | -0.6817 | none       |
| ARHGEF18 | 0.661  | 0.6241  | 2.2127 | 0.05225 | 0.142 | -4.44 | -0.9187 | none       |
| SIGLECL1 | -0.163 | -0.1392 | -2.212 | 0.05227 | 0.142 | -4.44 | 0.6297  | none       |
| AGER     | 0.199  | 0.1886  | 2.2124 | 0.05228 | 0.142 | -4.44 | 0.71271 | none       |
| HNF1B    | 0.261  | 0.1789  | 2.2122 | 0.05229 | 0.142 | -4.44 | -1.0813 | none       |
| DYNC1H1  | 0.772  | 0.8132  | 2.212  | 0.05231 | 0.142 | -4.44 | -0.5656 | none       |
| TTC14    | 0.434  | 0.4358  | 2.2106 | 0.05243 | 0.142 | -4.44 | 0.33201 | none       |
| CABIN1   | 0.566  | 0.649   | 2.2105 | 0.05244 | 0.142 | -4.44 | -0.7997 | none       |
| SYK      | 0.234  | 0.1727  | 2.2104 | 0.05245 | 0.142 | -4.44 | -1.1411 | none       |
| EHD4     | 0.408  | 0.4065  | 2.2103 | 0.05246 | 0.142 | -4.44 | -0.6461 | none       |
| NPAT     | 0.559  | 0.5458  | 2.2102 | 0.05247 | 0.142 | -4.44 | -0.9155 | none       |
| ADAM15   | 0.2    | 0.1728  | 2.2094 | 0.05254 | 0.143 | -4.44 | 0.51709 | none       |
| ZSWIM8   | 0.46   | 0.4878  | 2.2092 | 0.05256 | 0.143 | -4.44 | -1.0706 | none       |
| TPRG1L   | 0.305  | 0.1808  | 2.2091 | 0.05257 | 0.143 | -4.45 | -0.9866 | none       |
| TRUB2    | 0.262  | 0.2196  | 2.209  | 0.05257 | 0.143 | -4.45 | 0.53988 | none       |
| GOPC     | 0.213  | 0.2136  | 2.2081 | 0.05265 | 0.143 | -4.45 | 0.67205 | none       |
| EIF3M    | -0.277 | -0.2756 | -2.207 | 0.05275 | 0.143 | -4.45 | 0.95509 | none       |
| TMEM56   | 0.189  | 0.1391  | 2.2069 | 0.05276 | 0.143 | -4.45 | -1.2472 | none       |
| MT1G     | -0.466 | -0.2217 | -2.207 | 0.05279 | 0.143 | -4.45 | 0.73975 | none       |
| SLC22A1  | 0.337  | 0.3301  | 2.2063 | 0.05281 | 0.143 | -4.45 | 0.12821 | none       |
| MT2A     | -0.339 | -0.3389 | -2.206 | 0.05284 | 0.143 | -4.45 | 2.12749 | AA-related |
| TP73     | 0.443  | 0.3706  | 2.2057 | 0.05286 | 0.143 | -4.45 | -1.201  | none       |
| SLC7A13  | 0.288  | 0.1832  | 2.2057 | 0.05286 | 0.143 | -4.45 | -1.3652 | none       |
| SLC35A3  | 0.33   | 0.2099  | 2.2057 | 0.05286 | 0.143 | -4.45 | -0.3827 | none       |
| FAM163A  | 0.215  | 0.1837  | 2.2056 | 0.05287 | 0.143 | -4.45 | -0.6675 | none       |
| PINK1    | 0.298  | 0.272   | 2.2056 | 0.05287 | 0.143 | -4.45 | -0.4004 | none       |
| CCDC28B  | 0.428  | 0.3342  | 2.2049 | 0.05293 | 0.143 | -4.45 | 0.11074 | none       |

|           |        |         |        |         |       |       |         |            |
|-----------|--------|---------|--------|---------|-------|-------|---------|------------|
| PCOLCE2   | 0.413  | 0.3645  | 2.2046 | 0.05296 | 0.143 | -4.45 | 0.42784 | none       |
| SYT17     | 0.26   | 0.2046  | 2.2046 | 0.05296 | 0.143 | -4.45 | -1.1525 | none       |
| CFAP157   | 0.311  | 0.2769  | 2.2041 | 0.05301 | 0.144 | -4.45 | 1.28997 | none       |
| FADS3     | 0.381  | 0.3462  | 2.2029 | 0.05311 | 0.144 | -4.45 | 0.30657 | none       |
| PSEN2     | 0.208  | 0.2025  | 2.2028 | 0.05312 | 0.144 | -4.45 | -0.0096 | none       |
| ZNF316    | 0.597  | 0.5684  | 2.2027 | 0.05313 | 0.144 | -4.46 | -1.185  | none       |
| ABHD14A-  | 0.509  | 0.4331  | 2.2025 | 0.05315 | 0.144 | -4.46 | -0.2559 | none       |
| WDR88     | 0.333  | 0.2353  | 2.2015 | 0.05323 | 0.144 | -4.46 | -0.9126 | none       |
| BRD7      | 0.635  | 0.6249  | 2.2014 | 0.05324 | 0.144 | -4.46 | -0.7473 | none       |
| SFPQ      | 0.407  | 0.4118  | 2.2014 | 0.05325 | 0.144 | -4.46 | -0.4573 | none       |
| SMCR8     | 0.381  | 0.3817  | 2.2011 | 0.05328 | 0.144 | -4.46 | -0.7217 | none       |
| GABRG3    | 0.242  | 0.144   | 2.1991 | 0.05345 | 0.145 | -4.46 | -1.3496 | none       |
| S100A10   | -0.297 | -0.3147 | -2.199 | 0.05346 | 0.145 | -4.46 | 1.75423 | none       |
| SLC35B4   | 0.243  | 0.1723  | 2.1986 | 0.0535  | 0.145 | -4.46 | -0.354  | none       |
| IL9       | -0.359 | -0.2143 | -2.198 | 0.05351 | 0.145 | -4.46 | 1.43522 | none       |
| BTAFF1    | 0.422  | 0.4629  | 2.1984 | 0.05351 | 0.145 | -4.46 | -0.1286 | none       |
| PARP14    | 0.691  | 0.6829  | 2.1984 | 0.05351 | 0.145 | -4.46 | -0.7621 | none       |
| LYRM9     | 0.701  | 0.5435  | 2.1981 | 0.05354 | 0.145 | -4.46 | -0.9275 | none       |
| URI1      | 0.479  | 0.3792  | 2.198  | 0.05355 | 0.145 | -4.46 | -0.5814 | none       |
| TRMT10C   | -0.213 | -0.1576 | -2.198 | 0.05358 | 0.145 | -4.46 | 2.17653 | AA-related |
| NIPSNAP3  | -0.266 | -0.3208 | -2.198 | 0.05359 | 0.145 | -4.46 | 2.103   | AA-related |
| XPA       | 0.377  | 0.3056  | 2.1975 | 0.05359 | 0.145 | -4.46 | 0.37656 | none       |
| RBM26     | 0.642  | 0.6761  | 2.1968 | 0.05366 | 0.145 | -4.46 | -0.6657 | none       |
| PMPCA     | 0.216  | 0.2155  | 2.1967 | 0.05366 | 0.145 | -4.46 | -0.8413 | none       |
| RPL17-C18 | -0.244 | -0.2759 | -2.197 | 0.05367 | 0.145 | -4.46 | 0.21127 | none       |
| RPS6      | -0.219 | -0.2015 | -2.195 | 0.05379 | 0.145 | -4.47 | 2.01699 | none       |
| MRPS36    | -0.281 | -0.3558 | -2.195 | 0.05379 | 0.145 | -4.47 | 0.3627  | none       |
| F2R       | 0.312  | 0.2006  | 2.1952 | 0.0538  | 0.145 | -4.47 | 0.44046 | none       |
| OPRK1     | 0.216  | 0.137   | 2.1951 | 0.05381 | 0.145 | -4.47 | -0.827  | none       |
| VWA5A     | -0.18  | -0.1661 | -2.195 | 0.05382 | 0.145 | -4.47 | 1.10506 | none       |
| OR4K17    | 0.2    | 0.1314  | 2.1947 | 0.05384 | 0.145 | -4.47 | -1.4084 | none       |
| NOS3      | 0.318  | 0.3287  | 2.1943 | 0.05388 | 0.145 | -4.47 | 0.99925 | none       |
| KIR3DX1   | -0.228 | -0.165  | -2.194 | 0.05395 | 0.145 | -4.47 | 1.26451 | none       |
| C14ORF11  | -0.278 | -0.2783 | -2.194 | 0.05395 | 0.145 | -4.47 | 1.44167 | none       |
| ENY2      | -0.255 | -0.2461 | -2.193 | 0.054   | 0.145 | -4.47 | 1.17486 | none       |
| HIGD2A    | -0.265 | -0.2981 | -2.193 | 0.054   | 0.145 | -4.47 | 1.08232 | none       |
| TTC13     | 0.559  | 0.5129  | 2.1926 | 0.05404 | 0.145 | -4.47 | -0.6739 | none       |
| NDUFB9    | -0.429 | -0.4346 | -2.192 | 0.05405 | 0.145 | -4.47 | 1.73273 | none       |
| MTFR1L    | 0.198  | 0.111   | 2.1925 | 0.05405 | 0.145 | -4.47 | 0.44034 | none       |
| APOL1     | 0.587  | 0.5898  | 2.1919 | 0.0541  | 0.146 | -4.47 | -0.8454 | none       |



|          |        |         |        |         |       |       |         |            |
|----------|--------|---------|--------|---------|-------|-------|---------|------------|
| LAP3     | -0.211 | -0.1759 | -2.192 | 0.0541  | 0.146 | -4.47 | 1.76098 | none       |
| BRF1     | 0.333  | 0.358   | 2.1918 | 0.05411 | 0.146 | -4.47 | -0.7668 | none       |
| CCDC102B | 0.328  | 0.1874  | 2.1916 | 0.05412 | 0.146 | -4.47 | -0.8101 | none       |
| ASTE1    | 0.261  | 0.1991  | 2.1915 | 0.05413 | 0.146 | -4.47 | -0.3903 | none       |
| ADHFE1   | 0.608  | 0.4782  | 2.1915 | 0.05413 | 0.146 | -4.47 | -0.9519 | none       |
| PRKD2    | 0.356  | 0.3865  | 2.1912 | 0.05416 | 0.146 | -4.47 | -0.6559 | none       |
| OST4     | -0.383 | -0.4139 | -2.191 | 0.05421 | 0.146 | -4.47 | 1.76196 | none       |
| IFT172   | 0.342  | 0.2712  | 2.1899 | 0.05428 | 0.146 | -4.48 | -0.347  | none       |
| USP38    | 0.203  | 0.1432  | 2.189  | 0.05436 | 0.146 | -4.48 | 1.73283 | none       |
| COPA     | 0.31   | 0.2902  | 2.189  | 0.05436 | 0.146 | -4.48 | -0.7307 | none       |
| PDPR     | 0.341  | 0.3303  | 2.1884 | 0.05442 | 0.146 | -4.48 | -0.4892 | none       |
| MRAS     | 0.385  | 0.1851  | 2.1875 | 0.0545  | 0.146 | -4.48 | -1.0893 | none       |
| TMEM131  | 0.627  | 0.7251  | 2.1874 | 0.05451 | 0.146 | -4.48 | 0.40533 | none       |
| NCALD    | 0.431  | 0.2719  | 2.1871 | 0.05453 | 0.146 | -4.48 | -1.1788 | none       |
| UTY      | 0.349  | 0.2863  | 2.187  | 0.05454 | 0.146 | -4.48 | -0.6147 | none       |
| IDS      | 0.229  | 0.0906  | 2.187  | 0.05455 | 0.146 | -4.48 | 0.15062 | none       |
| MRPL54   | -0.296 | -0.2611 | -2.187 | 0.05456 | 0.146 | -4.48 | 2.18505 | AA-related |
| KCNH5    | 0.22   | 0.1742  | 2.1867 | 0.05457 | 0.146 | -4.48 | -0.1677 | none       |
| TF       | 0.421  | 0.2867  | 2.1866 | 0.05458 | 0.146 | -4.48 | -0.6385 | none       |
| CHKA     | 0.344  | 0.2744  | 2.1864 | 0.0546  | 0.146 | -4.48 | -0.1355 | none       |
| ELAC2    | 0.385  | 0.4096  | 2.1861 | 0.05463 | 0.147 | -4.48 | -0.8056 | none       |
| CD3D     | -0.401 | -0.4448 | -2.186 | 0.05463 | 0.147 | -4.48 | 1.62654 | none       |
| DRC7     | 0.204  | 0.1739  | 2.1848 | 0.05474 | 0.147 | -4.48 | -0.9566 | none       |
| GTPBP6   | 0.167  | 0.1408  | 2.1846 | 0.05476 | 0.147 | -4.48 | -0.4868 | none       |
| STK16    | -0.375 | -0.351  | -2.184 | 0.05483 | 0.147 | -4.48 | 1.77877 | none       |
| GGA3     | 0.433  | 0.459   | 2.1833 | 0.05488 | 0.147 | -4.49 | -0.5652 | none       |
| CPED1    | 0.263  | 0.2023  | 2.1833 | 0.05488 | 0.147 | -4.49 | -0.0428 | none       |
| ARID4B   | 0.572  | 0.632   | 2.1831 | 0.0549  | 0.147 | -4.49 | -0.2165 | none       |
| UBA52    | -0.336 | -0.3459 | -2.183 | 0.05494 | 0.147 | -4.49 | 1.83709 | none       |
| ELK3     | 0.496  | 0.469   | 2.1824 | 0.05496 | 0.147 | -4.49 | -0.9205 | none       |
| MIER3    | -0.287 | -0.2812 | -2.182 | 0.055   | 0.147 | -4.49 | 0.76087 | none       |
| C11ORF65 | 0.372  | 0.4219  | 2.1814 | 0.05505 | 0.147 | -4.49 | 0.80989 | none       |
| ATL3     | 0.223  | 0.0243  | 2.181  | 0.05509 | 0.148 | -4.49 | 0.20958 | none       |
| WDR91    | 0.458  | 0.3955  | 2.1807 | 0.05512 | 0.148 | -4.49 | -0.9413 | none       |
| RPL13A   | -0.333 | -0.3208 | -2.18  | 0.05516 | 0.148 | -4.49 | 1.65322 | none       |
| PTGER4   | 0.248  | 0.2395  | 2.1795 | 0.05523 | 0.148 | -4.49 | 1.35589 | none       |
| ENOSF1   | 0.363  | 0.3281  | 2.179  | 0.05527 | 0.148 | -4.49 | -0.0942 | none       |
| CES4A    | 0.319  | 0.2412  | 2.1787 | 0.0553  | 0.148 | -4.49 | -0.4434 | none       |
| GABRA6   | 0.411  | 0.3153  | 2.1785 | 0.05532 | 0.148 | -4.49 | 0.11635 | none       |
| SEC11A   | -0.349 | -0.3998 | -2.178 | 0.05534 | 0.148 | -4.49 | 1.77045 | none       |

|          |        |         |        |         |       |       |         |            |
|----------|--------|---------|--------|---------|-------|-------|---------|------------|
| NFATC1   | 0.344  | 0.3086  | 2.178  | 0.05537 | 0.148 | -4.49 | 0.14872 | none       |
| TAZ      | 0.22   | 0.1601  | 2.1779 | 0.05538 | 0.148 | -4.49 | 0.75776 | none       |
| GCSH     | 0.231  | 0.1253  | 2.1778 | 0.05539 | 0.148 | -4.49 | 0.09191 | none       |
| CNTD1    | 0.341  | 0.2622  | 2.1778 | 0.05539 | 0.148 | -4.49 | -0.4316 | none       |
| CCDC137  | 0.453  | 0.5297  | 2.1776 | 0.05541 | 0.148 | -4.49 | -0.3652 | none       |
| RARA     | 0.378  | 0.3517  | 2.1755 | 0.0556  | 0.149 | -4.5  | -0.6238 | none       |
| SNX19    | 0.462  | 0.4599  | 2.1741 | 0.05573 | 0.149 | -4.5  | -0.2324 | none       |
| RPUSD1   | 0.219  | 0.1966  | 2.174  | 0.05574 | 0.149 | -4.5  | 0.85241 | none       |
| ALPK1    | 0.578  | 0.3913  | 2.1737 | 0.05577 | 0.149 | -4.5  | -0.9071 | none       |
| MYB      | 0.481  | 0.5094  | 2.1736 | 0.05577 | 0.149 | -4.5  | -0.6831 | none       |
| CENPE    | 0.282  | 0.1901  | 2.1735 | 0.05578 | 0.149 | -4.5  | 0.02051 | none       |
| FUBP3    | 0.42   | 0.3753  | 2.1732 | 0.05582 | 0.149 | -4.5  | -0.9422 | none       |
| IQGAP1   | 0.765  | 0.7932  | 2.173  | 0.05583 | 0.149 | -4.5  | -0.9274 | none       |
| PAX1     | 0.378  | 0.2967  | 2.1729 | 0.05585 | 0.149 | -4.5  | 0.24585 | none       |
| PTPN11   | 0.571  | 0.6096  | 2.1715 | 0.05598 | 0.149 | -4.5  | -0.4973 | none       |
| GPR26    | 0.153  | 0.1064  | 2.1714 | 0.05599 | 0.149 | -4.5  | -1.2235 | none       |
| AGA      | -0.541 | -0.4909 | -2.171 | 0.05601 | 0.149 | -4.5  | 1.74018 | none       |
| RPS10    | -0.43  | -0.4368 | -2.171 | 0.05602 | 0.149 | -4.5  | 1.48129 | none       |
| PLSCR1   | -0.743 | -0.6423 | -2.171 | 0.05603 | 0.149 | -4.51 | 2.15406 | AA-related |
| LRRC43   | 0.42   | 0.3738  | 2.1707 | 0.05605 | 0.149 | -4.51 | -0.6386 | none       |
| IMPDH2   | -0.222 | -0.1699 | -2.17  | 0.05611 | 0.15  | -4.51 | 2.21283 | AA-related |
| SPATA3   | 0.262  | 0.2862  | 2.1695 | 0.05616 | 0.15  | -4.51 | 0.01167 | none       |
| CFL2     | 0.326  | 0.1781  | 2.1694 | 0.05617 | 0.15  | -4.51 | -0.1246 | none       |
| SULT6B1  | -0.491 | -0.3835 | -2.169 | 0.0562  | 0.15  | -4.51 | 2.07141 | none       |
| MPPED1   | 0.26   | 0.1955  | 2.1682 | 0.05629 | 0.15  | -4.51 | -0.334  | none       |
| IMP3     | -0.327 | -0.3211 | -2.168 | 0.05631 | 0.15  | -4.51 | 2.47358 | AA-related |
| ZNF133   | 0.335  | 0.2941  | 2.1676 | 0.05634 | 0.15  | -4.51 | -1.0429 | none       |
| RPL37A   | -0.443 | -0.4608 | -2.168 | 0.05635 | 0.15  | -4.51 | 1.44832 | none       |
| ERVK3-1  | -0.178 | -0.1495 | -2.167 | 0.05635 | 0.15  | -4.51 | 0.7819  | none       |
| APBA1    | 0.238  | 0.1955  | 2.1674 | 0.05636 | 0.15  | -4.51 | -1.295  | none       |
| DCUN1D4  | 0.424  | 0.2931  | 2.1673 | 0.05637 | 0.15  | -4.51 | -0.0605 | none       |
| SEC22B   | 0.201  | 0.0835  | 2.1671 | 0.05639 | 0.15  | -4.51 | -0.9293 | none       |
| EGR3     | 0.252  | 0.2823  | 2.1669 | 0.05641 | 0.15  | -4.51 | -0.5817 | none       |
| RACK1    | -0.36  | -0.3708 | -2.167 | 0.05642 | 0.15  | -4.51 | 1.93437 | none       |
| HGS      | 0.468  | 0.5322  | 2.1662 | 0.05647 | 0.15  | -4.51 | -0.3573 | none       |
| HIST1H4G | 0.467  | 0.467   | 2.1661 | 0.05648 | 0.15  | -4.51 | 1.10751 | none       |
| DCAF4    | 0.364  | 0.2995  | 2.1657 | 0.05652 | 0.15  | -4.51 | -0.8578 | none       |
| UGT2A1   | 0.323  | 0.2539  | 2.165  | 0.05659 | 0.15  | -4.51 | -1.0008 | none       |
| DPF3     | 0.278  | 0.3119  | 2.1646 | 0.05662 | 0.151 | -4.51 | -0.1838 | none       |
| CREBBP   | 0.542  | 0.6435  | 2.1644 | 0.05664 | 0.151 | -4.52 | -0.398  | none       |

|          |        |         |        |         |       |       |         |            |
|----------|--------|---------|--------|---------|-------|-------|---------|------------|
| SCNM1    | 0.242  | 0.1466  | 2.1643 | 0.05665 | 0.151 | -4.52 | -0.8243 | none       |
| GP1BA    | 0.262  | 0.1725  | 2.1641 | 0.05667 | 0.151 | -4.52 | -0.8313 | none       |
| KCNK12   | -0.161 | -0.1335 | -2.164 | 0.05671 | 0.151 | -4.52 | 1.84419 | none       |
| SNX30    | 0.334  | 0.3007  | 2.1633 | 0.05674 | 0.151 | -4.52 | -0.8904 | none       |
| TRAF4    | -0.362 | -0.19   | -2.163 | 0.05676 | 0.151 | -4.52 | 1.57006 | none       |
| RPS6KA2  | 0.225  | 0.2359  | 2.1622 | 0.05685 | 0.151 | -4.52 | 0.77052 | none       |
| KRT7     | -0.544 | -0.3943 | -2.162 | 0.05687 | 0.151 | -4.52 | #####   | none       |
| INPP5D   | 0.487  | 0.4919  | 2.1619 | 0.05688 | 0.151 | -4.52 | -0.5628 | none       |
| ZNF583   | 0.515  | 0.3415  | 2.1617 | 0.05689 | 0.151 | -4.52 | -0.836  | none       |
| SPX      | 0.171  | 0.1585  | 2.1613 | 0.05693 | 0.151 | -4.52 | 0.89985 | none       |
| CYTH1    | 0.328  | 0.3447  | 2.1611 | 0.05695 | 0.151 | -4.52 | -0.3347 | none       |
| CDC45    | -0.252 | -0.2375 | -2.16  | 0.05707 | 0.151 | -4.52 | 2.26225 | AA-related |
| SOX11    | 0.169  | 0.1216  | 2.1598 | 0.05707 | 0.151 | -4.52 | -1.106  | none       |
| C4ORF33  | 0.456  | 0.2627  | 2.1598 | 0.05708 | 0.151 | -4.52 | -0.446  | none       |
| EEF1B2   | -0.361 | -0.39   | -2.16  | 0.05709 | 0.151 | -4.52 | 1.48566 | none       |
| C6ORF136 | -0.945 | -0.8351 | -2.159 | 0.05715 | 0.152 | -4.52 | 1.0346  | none       |
| RPTOR    | 0.608  | 0.6475  | 2.1589 | 0.05717 | 0.152 | -4.52 | -1.1596 | none       |
| ZMYM5    | 0.393  | 0.2626  | 2.1574 | 0.05731 | 0.152 | -4.53 | -0.5027 | none       |
| FBL      | -0.228 | -0.198  | -2.157 | 0.05738 | 0.152 | -4.53 | 2.22328 | AA-related |
| ELMO2    | 0.38   | 0.3588  | 2.1565 | 0.0574  | 0.152 | -4.53 | -0.7548 | none       |
| RPL27A   | -0.464 | -0.5001 | -2.156 | 0.05741 | 0.152 | -4.53 | 1.29722 | none       |
| GPATCH2  | 0.289  | 0.2245  | 2.1563 | 0.05741 | 0.152 | -4.53 | -0.3082 | none       |
| FAM3D    | 0.196  | 0.1956  | 2.1559 | 0.05745 | 0.152 | -4.53 | -0.5356 | none       |
| LPAR3    | 0.236  | 0.1194  | 2.1556 | 0.05748 | 0.152 | -4.53 | -0.6698 | none       |
| ATP2B3   | -0.193 | -0.147  | -2.155 | 0.05751 | 0.152 | -4.53 | 0.55353 | none       |
| NRSN1    | 0.318  | 0.1993  | 2.155  | 0.05753 | 0.152 | -4.53 | -0.8653 | none       |
| ROMO1    | -0.444 | -0.4258 | -2.155 | 0.05756 | 0.152 | -4.53 | 1.80376 | none       |
| SKAP2    | 0.352  | 0.3669  | 2.1545 | 0.05758 | 0.152 | -4.53 | -0.035  | none       |
| NR1H2    | 0.236  | 0.176   | 2.1542 | 0.05761 | 0.152 | -4.53 | -1.4014 | none       |
| GSTM1    | 0.229  | 0.1346  | 2.1541 | 0.05763 | 0.152 | -4.53 | -0.2825 | none       |
| FCHSD1   | 0.421  | 0.4408  | 2.1541 | 0.05763 | 0.152 | -4.53 | -0.7679 | none       |
| TEX35    | 0.44   | 0.3884  | 2.1531 | 0.05772 | 0.153 | -4.53 | -0.8091 | none       |
| ANKRD20A | 0.188  | 0.1571  | 2.1529 | 0.05774 | 0.153 | -4.53 | -0.8586 | none       |
| KCTD13   | 0.284  | 0.2599  | 2.1528 | 0.05774 | 0.153 | -4.53 | -0.7384 | none       |
| RNF166   | 0.251  | 0.2234  | 2.1526 | 0.05776 | 0.153 | -4.53 | 1.07208 | none       |
| PEF1     | -0.265 | -0.2665 | -2.152 | 0.05779 | 0.153 | -4.53 | 2.07731 | none       |
| RNF125   | 0.507  | 0.4378  | 2.1523 | 0.0578  | 0.153 | -4.53 | -1.0735 | none       |
| SNRPD2   | -0.226 | -0.198  | -2.152 | 0.05783 | 0.153 | -4.53 | 0.82923 | none       |
| SNED1    | 0.456  | 0.3631  | 2.1518 | 0.05784 | 0.153 | -4.53 | -0.0948 | none       |
| FOLR3    | 0.357  | 0.2832  | 2.1517 | 0.05785 | 0.153 | -4.53 | -0.5748 | none       |

|          |        |         |        |         |       |       |         |            |
|----------|--------|---------|--------|---------|-------|-------|---------|------------|
| LTK      | -0.198 | -0.1539 | -2.152 | 0.05785 | 0.153 | -4.53 | 0.185   | none       |
| TIAL1    | 0.236  | 0.1104  | 2.1512 | 0.0579  | 0.153 | -4.54 | -0.8694 | none       |
| SLC7A14  | 0.642  | 0.4423  | 2.151  | 0.05792 | 0.153 | -4.54 | -0.85   | none       |
| PML      | 0.399  | 0.4015  | 2.1507 | 0.05795 | 0.153 | -4.54 | -0.2156 | none       |
| DENND4A  | 0.647  | 0.5884  | 2.1506 | 0.05796 | 0.153 | -4.54 | -0.6308 | none       |
| C17ORF53 | 0.315  | 0.3337  | 2.1505 | 0.05797 | 0.153 | -4.54 | 0.52435 | none       |
| HCST     | -0.306 | -0.3214 | -2.15  | 0.05797 | 0.153 | -4.54 | 1.71992 | none       |
| TM9SF3   | 0.339  | 0.2463  | 2.1504 | 0.05797 | 0.153 | -4.54 | 1.0456  | none       |
| LNPEP    | 0.276  | 0.1984  | 2.1497 | 0.05805 | 0.153 | -4.54 | 0.65061 | none       |
| SFT2D2   | 0.336  | 0.1976  | 2.1495 | 0.05807 | 0.153 | -4.54 | -0.6356 | none       |
| VPS29    | -0.288 | -0.3213 | -2.149 | 0.05809 | 0.153 | -4.54 | 0.73014 | none       |
| BLOC1S4  | -0.342 | -0.2251 | -2.149 | 0.05813 | 0.153 | -4.54 | 0.91389 | none       |
| CBR1     | -0.244 | -0.2247 | -2.149 | 0.05814 | 0.153 | -4.54 | 2.16765 | AA-related |
| DISP3    | 0.235  | 0.2005  | 2.1484 | 0.05817 | 0.153 | -4.54 | -1.1804 | none       |
| SRI      | -0.326 | -0.3369 | -2.148 | 0.05818 | 0.153 | -4.54 | 1.46925 | none       |
| COMMD6   | -0.452 | -0.4547 | -2.148 | 0.0582  | 0.153 | -4.54 | 2.13066 | AA-related |
| ZFYVE28  | 0.311  | 0.2333  | 2.148  | 0.05821 | 0.153 | -4.54 | -0.2824 | none       |
| NCF2     | 0.521  | 0.4411  | 2.1478 | 0.05823 | 0.153 | -4.54 | -0.8528 | none       |
| SLC27A2  | -0.273 | -0.2291 | -2.148 | 0.05823 | 0.153 | -4.54 | 0.81369 | none       |
| KIAA2026 | -0.331 | -0.1869 | -2.147 | 0.05828 | 0.153 | -4.54 | 1.37131 | none       |
| ADAMTS6  | 0.196  | 0.1743  | 2.1473 | 0.05828 | 0.153 | -4.54 | -0.4077 | none       |
| BFSP1    | 0.195  | 0.1793  | 2.1472 | 0.05829 | 0.153 | -4.54 | -0.4682 | none       |
| PTPN18   | 0.545  | 0.5542  | 2.1467 | 0.05834 | 0.154 | -4.54 | -0.4995 | none       |
| PPP2R3C  | 0.211  | 0.1419  | 2.1466 | 0.05835 | 0.154 | -4.54 | 0.49237 | none       |
| HYAL4    | 0.504  | 0.3323  | 2.1465 | 0.05836 | 0.154 | -4.54 | -0.6496 | none       |
| ZBTB37   | 0.286  | 0.2248  | 2.1462 | 0.05839 | 0.154 | -4.54 | -0.0605 | none       |
| POLR2D   | 0.184  | 0.135   | 2.1451 | 0.0585  | 0.154 | -4.55 | -1.3576 | none       |
| CALCB    | -0.249 | -0.2674 | -2.145 | 0.05852 | 0.154 | -4.55 | 0.07782 | none       |
| ALMS1    | 0.443  | 0.4904  | 2.1436 | 0.05864 | 0.154 | -4.55 | -0.2328 | none       |
| MORN2    | -0.513 | -0.5876 | -2.144 | 0.05864 | 0.154 | -4.55 | 0.9337  | none       |
| SPIN4    | 0.213  | 0.1517  | 2.1435 | 0.05865 | 0.154 | -4.55 | -0.6256 | none       |
| TMEM38B  | -0.321 | -0.3341 | -2.143 | 0.05867 | 0.154 | -4.55 | 0.68823 | none       |
| MAP4     | 0.692  | 0.7765  | 2.1432 | 0.05868 | 0.154 | -4.55 | -0.4265 | none       |
| ZNF841   | 0.547  | 0.4367  | 2.143  | 0.0587  | 0.154 | -4.55 | 0.10635 | none       |
| RPS6KA4  | 0.233  | 0.2346  | 2.1428 | 0.05871 | 0.154 | -4.55 | -0.9364 | none       |
| ARL5A    | 0.311  | 0.194   | 2.1427 | 0.05873 | 0.154 | -4.55 | 0.17974 | none       |
| LMX1B    | 0.246  | 0.1612  | 2.1424 | 0.05875 | 0.154 | -4.55 | -1.2058 | none       |
| S100A5   | -0.385 | -0.2699 | -2.142 | 0.05878 | 0.154 | -4.55 | 0.74118 | none       |
| OCEL1    | 0.351  | 0.1537  | 2.1419 | 0.0588  | 0.154 | -4.55 | -0.6597 | none       |
| LDAH     | 0.325  | 0.2651  | 2.1417 | 0.05883 | 0.154 | -4.55 | -0.8479 | none       |

|         |        |         |        |         |       |       |         |      |
|---------|--------|---------|--------|---------|-------|-------|---------|------|
| UBA1    | 0.287  | 0.2807  | 2.1416 | 0.05884 | 0.154 | -4.55 | -0.8034 | none |
| PCSK4   | -0.295 | -0.2525 | -2.141 | 0.05893 | 0.155 | -4.55 | 0.77695 | none |
| RAB11B  | 0.295  | 0.2119  | 2.1405 | 0.05895 | 0.155 | -4.55 | -0.2469 | none |
| ADD1    | 0.366  | 0.3675  | 2.1401 | 0.05898 | 0.155 | -4.55 | -0.9735 | none |
| ARGLU1  | 0.306  | 0.2779  | 2.1398 | 0.05901 | 0.155 | -4.55 | 0.35732 | none |
| MUC13   | 0.263  | 0.2698  | 2.1391 | 0.05909 | 0.155 | -4.55 | -0.6999 | none |
| SAT1    | -0.193 | -0.1995 | -2.139 | 0.05909 | 0.155 | -4.55 | 0.11322 | none |
| HUS1B   | -0.165 | -0.1136 | -2.139 | 0.0591  | 0.155 | -4.55 | 1.2031  | none |
| LHFPL4  | 0.335  | 0.332   | 2.1385 | 0.05915 | 0.155 | -4.56 | 0.56722 | none |
| PAK1    | 0.365  | 0.3655  | 2.1381 | 0.05918 | 0.155 | -4.56 | -0.0982 | none |
| ZNF444  | 0.443  | 0.3542  | 2.1375 | 0.05924 | 0.155 | -4.56 | -0.902  | none |
| PDGFA   | 0.416  | 0.4263  | 2.1367 | 0.05932 | 0.155 | -4.56 | -0.1762 | none |
| GNB1    | 0.264  | 0.2365  | 2.1366 | 0.05933 | 0.155 | -4.56 | -0.3322 | none |
| CRLS1   | 0.3    | 0.2349  | 2.1364 | 0.05935 | 0.155 | -4.56 | -0.1194 | none |
| ALS2CL  | 0.291  | 0.2547  | 2.1364 | 0.05935 | 0.155 | -4.56 | 0.08944 | none |
| PDPN    | 0.244  | 0.1419  | 2.1362 | 0.05936 | 0.155 | -4.56 | -0.4731 | none |
| ZNF165  | 0.422  | 0.3928  | 2.1358 | 0.05941 | 0.156 | -4.56 | -0.6932 | none |
| LPGAT1  | 0.213  | 0.1499  | 2.1354 | 0.05945 | 0.156 | -4.56 | 0.27467 | none |
| ZKSCAN2 | 0.324  | 0.2902  | 2.1352 | 0.05947 | 0.156 | -4.56 | -1.0345 | none |
| GNA12   | -0.198 | -0.0273 | -2.135 | 0.05951 | 0.156 | -4.56 | 0.79085 | none |
| SHBG    | -0.645 | -0.5008 | -2.134 | 0.05955 | 0.156 | -4.56 | 0.71545 | none |
| RDH10   | 0.279  | 0.1334  | 2.1343 | 0.05956 | 0.156 | -4.56 | -1.0721 | none |
| UTP11   | 0.196  | 0.1699  | 2.1339 | 0.0596  | 0.156 | -4.56 | -0.7117 | none |
| HIKESHI | -0.502 | -0.5219 | -2.134 | 0.05964 | 0.156 | -4.56 | 1.59739 | none |
| GOLIM4  | 0.334  | 0.3989  | 2.1334 | 0.05965 | 0.156 | -4.56 | -0.0568 | none |
| ST3GAL1 | 0.306  | 0.3107  | 2.1333 | 0.05966 | 0.156 | -4.56 | 0.53799 | none |
| ACAP1   | 0.24   | 0.1741  | 2.1327 | 0.05972 | 0.156 | -4.56 | -0.6402 | none |
| FAAP100 | 0.283  | 0.2777  | 2.1324 | 0.05974 | 0.156 | -4.57 | 0.21087 | none |
| GYPC    | -0.317 | -0.2879 | -2.132 | 0.05978 | 0.156 | -4.57 | 1.03672 | none |
| TSSK3   | 0.294  | 0.239   | 2.1317 | 0.05982 | 0.156 | -4.57 | -0.4438 | none |
| CLINT1  | 0.384  | 0.3876  | 2.1315 | 0.05984 | 0.156 | -4.57 | -0.2494 | none |
| RAB8B   | -0.293 | -0.3167 | -2.131 | 0.0599  | 0.156 | -4.57 | 0.6769  | none |
| APIP    | -0.368 | -0.3743 | -2.131 | 0.05991 | 0.156 | -4.57 | 1.22795 | none |
| BAZ2A   | 0.575  | 0.5885  | 2.1307 | 0.05991 | 0.156 | -4.57 | -0.4376 | none |
| MYO9A   | 0.662  | 0.5958  | 2.1305 | 0.05993 | 0.156 | -4.57 | 0.03445 | none |
| SLC46A1 | 0.67   | 0.5445  | 2.1299 | 0.05999 | 0.157 | -4.57 | -1.1189 | none |
| CEACAM8 | 0.332  | 0.218   | 2.1299 | 0.06    | 0.157 | -4.57 | -0.9278 | none |
| ADAR    | 0.729  | 0.7471  | 2.1297 | 0.06001 | 0.157 | -4.57 | -0.7898 | none |
| IMPG2   | 0.232  | 0.1726  | 2.1294 | 0.06004 | 0.157 | -4.57 | -1.1861 | none |
| GPR160  | 0.268  | 0.1696  | 2.1289 | 0.06009 | 0.157 | -4.57 | -0.5951 | none |

|          |        |         |        |         |       |       |         |            |
|----------|--------|---------|--------|---------|-------|-------|---------|------------|
| TRAP1    | 0.225  | 0.2008  | 2.1288 | 0.06011 | 0.157 | -4.57 | -0.2798 | none       |
| CKLF     | -0.377 | -0.3952 | -2.129 | 0.06012 | 0.157 | -4.57 | 0.95216 | none       |
| NMRK2    | 0.191  | 0.191   | 2.1284 | 0.06014 | 0.157 | -4.57 | 1.38882 | none       |
| PPM1B    | 0.3    | 0.2195  | 2.1284 | 0.06015 | 0.157 | -4.57 | -0.1212 | none       |
| GFM2     | 0.36   | 0.2536  | 2.1282 | 0.06016 | 0.157 | -4.57 | 0.56695 | none       |
| MORN5    | 0.355  | 0.3947  | 2.1279 | 0.06019 | 0.157 | -4.57 | 0.12302 | none       |
| ERBIN    | 0.6    | 0.6531  | 2.1278 | 0.06021 | 0.157 | -4.57 | 0.1944  | none       |
| MBD1     | 0.349  | 0.3778  | 2.1277 | 0.06022 | 0.157 | -4.57 | 0.25639 | none       |
| TMEM129  | 0.211  | 0.236   | 2.1276 | 0.06023 | 0.157 | -4.57 | -1.0288 | none       |
| HLA-DOB  | 0.217  | 0.202   | 2.1275 | 0.06023 | 0.157 | -4.57 | 0.3002  | none       |
| GOT1     | -0.197 | -0.1864 | -2.127 | 0.06025 | 0.157 | -4.57 | 1.28349 | none       |
| MDH1     | -0.212 | -0.2067 | -2.127 | 0.06029 | 0.157 | -4.57 | 0.45269 | none       |
| SLC9A9   | -0.385 | -0.5018 | -2.126 | 0.06036 | 0.157 | -4.57 | 0.6018  | none       |
| TGFBR3   | 0.338  | 0.293   | 2.1262 | 0.06036 | 0.157 | -4.57 | 1.22098 | none       |
| QSOX2    | 0.396  | 0.3643  | 2.1261 | 0.06037 | 0.157 | -4.57 | -1.1345 | none       |
| NCSTN    | 0.22   | 0.1444  | 2.126  | 0.06038 | 0.157 | -4.57 | -0.7779 | none       |
| SEL1L    | 0.419  | 0.3743  | 2.1258 | 0.0604  | 0.157 | -4.58 | -0.4991 | none       |
| CPNE8    | 0.404  | 0.3131  | 2.1257 | 0.06041 | 0.157 | -4.58 | -1.168  | none       |
| RPL7     | -0.24  | -0.2363 | -2.126 | 0.06043 | 0.157 | -4.58 | 1.77237 | none       |
| PXMP4    | 0.36   | 0.2004  | 2.1255 | 0.06044 | 0.157 | -4.58 | -0.2192 | none       |
| MSLN     | -0.222 | -0.1381 | -2.125 | 0.06049 | 0.157 | -4.58 | 0.70739 | none       |
| LRRC42   | -0.189 | -0.0902 | -2.125 | 0.06052 | 0.157 | -4.58 | 2.47487 | AA-related |
| F11R     | 0.381  | 0.2379  | 2.1244 | 0.06055 | 0.157 | -4.58 | -0.8956 | none       |
| NDUFC2   | -0.42  | -0.402  | -2.124 | 0.06055 | 0.157 | -4.58 | 1.72285 | none       |
| SLC13A2  | -0.189 | -0.132  | -2.124 | 0.06057 | 0.157 | -4.58 | 0.7205  | none       |
| SCML4    | 0.302  | 0.2435  | 2.1242 | 0.06057 | 0.157 | -4.58 | 0.04249 | none       |
| BRMS1L   | -0.247 | -0.2527 | -2.124 | 0.06061 | 0.157 | -4.58 | 0.7189  | none       |
| ZNF286B  | 0.503  | 0.491   | 2.1233 | 0.06066 | 0.158 | -4.58 | -0.8805 | none       |
| TMEM87A  | 0.201  | 0.0706  | 2.123  | 0.06069 | 0.158 | -4.58 | 0.30893 | none       |
| OPTC     | 0.182  | 0.1824  | 2.1227 | 0.06072 | 0.158 | -4.58 | 0.87864 | none       |
| TRIM33   | 0.524  | 0.5041  | 2.1224 | 0.06075 | 0.158 | -4.58 | -0.2667 | none       |
| RPL10A   | -0.299 | -0.2918 | -2.122 | 0.06077 | 0.158 | -4.58 | 2.04521 | none       |
| FBXO5    | 0.198  | 0.1753  | 2.122  | 0.06079 | 0.158 | -4.58 | -0.1322 | none       |
| PANK1    | 0.412  | 0.2961  | 2.1217 | 0.06082 | 0.158 | -4.58 | 0.0406  | none       |
| PFDN4    | -0.246 | -0.3225 | -2.122 | 0.06082 | 0.158 | -4.58 | 0.92347 | none       |
| SMARCD2  | -0.215 | -0.105  | -2.121 | 0.06093 | 0.158 | -4.58 | 1.52237 | none       |
| MFSD2B   | 0.211  | 0.1664  | 2.1204 | 0.06095 | 0.158 | -4.58 | -1.0926 | none       |
| ARHGEF4C | 0.221  | 0.1822  | 2.1203 | 0.06096 | 0.158 | -4.58 | -1.1152 | none       |
| UCK2     | -0.241 | -0.1048 | -2.12  | 0.06098 | 0.158 | -4.58 | 0.82849 | none       |
| E2F6     | 0.26   | 0.1831  | 2.1199 | 0.061   | 0.158 | -4.58 | 0.9591  | none       |

|          |        |         |        |         |       |       |         |      |
|----------|--------|---------|--------|---------|-------|-------|---------|------|
| MYBL1    | 0.266  | 0.2275  | 2.1199 | 0.061   | 0.158 | -4.58 | 0.34426 | none |
| ZNF213   | 0.318  | 0.323   | 2.1195 | 0.06105 | 0.158 | -4.59 | 0.82633 | none |
| NHLRC2   | 0.263  | 0.1862  | 2.1186 | 0.06113 | 0.158 | -4.59 | -0.6539 | none |
| SMIM2    | 0.358  | 0.2897  | 2.1186 | 0.06114 | 0.158 | -4.59 | 0.02598 | none |
| AFF1     | 0.556  | 0.5699  | 2.1182 | 0.06117 | 0.158 | -4.59 | -0.5864 | none |
| RPS8     | -0.281 | -0.2832 | -2.118 | 0.06118 | 0.158 | -4.59 | 1.74349 | none |
| CPEB1    | 0.273  | 0.2346  | 2.1181 | 0.06118 | 0.158 | -4.59 | -0.8127 | none |
| SERPINI2 | 0.34   | 0.2471  | 2.1181 | 0.06119 | 0.158 | -4.59 | -0.5524 | none |
| EBP      | -0.285 | -0.281  | -2.118 | 0.06123 | 0.159 | -4.59 | 1.03087 | none |
| PMEPA1   | 0.312  | 0.2776  | 2.1175 | 0.06124 | 0.159 | -4.59 | 0.60112 | none |
| CMKLR1   | 0.314  | 0.2772  | 2.1174 | 0.06126 | 0.159 | -4.59 | 0.94506 | none |
| DAW1     | 0.308  | 0.1924  | 2.1174 | 0.06126 | 0.159 | -4.59 | -0.0219 | none |
| GMEB2    | 0.271  | 0.2654  | 2.1173 | 0.06126 | 0.159 | -4.59 | -0.5073 | none |
| GFOD2    | 0.318  | 0.2132  | 2.1159 | 0.06141 | 0.159 | -4.59 | -1.168  | none |
| NRN1L    | 0.238  | 0.2492  | 2.1156 | 0.06144 | 0.159 | -4.59 | -0.0366 | none |
| FLOT1    | -0.478 | -0.2959 | -2.115 | 0.06155 | 0.159 | -4.59 | 1.93451 | none |
| DSC2     | 0.268  | 0.1919  | 2.1143 | 0.06158 | 0.159 | -4.59 | -1.0206 | none |
| KIF15    | 0.439  | 0.5193  | 2.1138 | 0.06162 | 0.159 | -4.59 | -0.1485 | none |
| CALN1    | 0.214  | 0.1968  | 2.1138 | 0.06162 | 0.159 | -4.59 | 0.4143  | none |
| RBM41    | 0.471  | 0.4064  | 2.1136 | 0.06165 | 0.159 | -4.59 | -0.4086 | none |
| TMEM127  | 0.311  | 0.2236  | 2.1132 | 0.06168 | 0.159 | -4.59 | -0.4001 | none |
| CKB      | -0.56  | -0.5385 | -2.113 | 0.06169 | 0.159 | -4.6  | 0.15246 | none |
| SEH1L    | 0.295  | 0.1556  | 2.113  | 0.0617  | 0.159 | -4.6  | -0.3188 | none |
| EIF2AK1  | 0.37   | 0.3246  | 2.1118 | 0.06183 | 0.16  | -4.6  | 0.22443 | none |
| RFX1     | 0.628  | 0.6047  | 2.1114 | 0.06187 | 0.16  | -4.6  | -1.0916 | none |
| ERCC5    | 0.62   | 0.6322  | 2.1114 | 0.06187 | 0.16  | -4.6  | -0.6544 | none |
| HYDIN    | 0.565  | 0.4576  | 2.1107 | 0.06194 | 0.16  | -4.6  | -1.0902 | none |
| ARL17A   | 0.308  | 0.3099  | 2.1105 | 0.06196 | 0.16  | -4.6  | -0.7095 | none |
| SVEP1    | 0.162  | 0.1196  | 2.1099 | 0.06202 | 0.16  | -4.6  | -1.3851 | none |
| DHFR2    | 0.376  | 0.2846  | 2.1096 | 0.06205 | 0.16  | -4.6  | -1.1603 | none |
| MSX1     | 0.163  | 0.1827  | 2.1094 | 0.06207 | 0.16  | -4.6  | 0.75046 | none |
| SH3BP2   | 0.286  | 0.3429  | 2.1088 | 0.06214 | 0.16  | -4.6  | -0.0501 | none |
| HAGH     | 0.357  | 0.2348  | 2.1083 | 0.06219 | 0.16  | -4.6  | -0.7654 | none |
| PCM1     | 0.799  | 0.8494  | 2.1082 | 0.0622  | 0.16  | -4.6  | -0.5681 | none |
| PURB     | 0.372  | 0.3411  | 2.1078 | 0.06224 | 0.16  | -4.6  | -0.9425 | none |
| EEA1     | 0.438  | 0.4896  | 2.1077 | 0.06225 | 0.161 | -4.6  | -0.7671 | none |
| NEDD8    | -0.232 | -0.2262 | -2.107 | 0.06229 | 0.161 | -4.6  | 0.94845 | none |
| NPIPA8   | 0.455  | 0.3903  | 2.1071 | 0.06232 | 0.161 | -4.6  | -0.9807 | none |
| XCL2     | -0.338 | -0.2626 | -2.107 | 0.06234 | 0.161 | -4.6  | 0.49524 | none |
| TMEM163  | -0.149 | -0.121  | -2.107 | 0.06236 | 0.161 | -4.6  | 0.05229 | none |

|           |        |         |        |         |       |       |         |            |
|-----------|--------|---------|--------|---------|-------|-------|---------|------------|
| SORCS2    | -0.338 | -0.2488 | -2.107 | 0.06237 | 0.161 | -4.61 | 1.24618 | none       |
| OMA1      | 0.227  | 0.0675  | 2.1066 | 0.06237 | 0.161 | -4.61 | 0.22648 | none       |
| RPL26     | -0.313 | -0.3479 | -2.107 | 0.06237 | 0.161 | -4.61 | 1.44013 | none       |
| LRCOL1    | 0.316  | 0.2347  | 2.1065 | 0.06238 | 0.161 | -4.61 | 0.35996 | none       |
| CLTA      | -0.26  | -0.2386 | -2.106 | 0.0624  | 0.161 | -4.61 | 2.10395 | AA-related |
| GLO1      | -0.239 | -0.2746 | -2.106 | 0.0624  | 0.161 | -4.61 | 1.2974  | none       |
| CREBZF    | 0.216  | 0.2269  | 2.1062 | 0.06241 | 0.161 | -4.61 | 0.03819 | none       |
| IQGAP3    | 0.224  | 0.213   | 2.1059 | 0.06244 | 0.161 | -4.61 | -1.0067 | none       |
| ATP6V1A   | 0.183  | 0.0943  | 2.1058 | 0.06244 | 0.161 | -4.61 | -0.5644 | none       |
| TUBB3     | 0.321  | 0.2359  | 2.1057 | 0.06245 | 0.161 | -4.61 | -0.7659 | none       |
| ERLIN1    | -0.222 | -0.1578 | -2.106 | 0.06247 | 0.161 | -4.61 | 2.34133 | AA-related |
| S100A6    | -0.422 | -0.4318 | -2.105 | 0.06249 | 0.161 | -4.61 | 1.80985 | none       |
| SYCE2     | 0.493  | 0.2785  | 2.1054 | 0.06249 | 0.161 | -4.61 | 0.0988  | none       |
| RPL39     | -0.543 | -0.6106 | -2.104 | 0.06266 | 0.161 | -4.61 | 1.97363 | none       |
| DNAJB13   | 0.457  | 0.3581  | 2.1035 | 0.06269 | 0.161 | -4.61 | -1.3004 | none       |
| DPYD      | 0.25   | 0.1943  | 2.1028 | 0.06276 | 0.161 | -4.61 | 0.19732 | none       |
| IGSF22    | 0.218  | 0.1379  | 2.1027 | 0.06277 | 0.161 | -4.61 | 0.3916  | none       |
| ARL6IP1   | -0.318 | -0.3579 | -2.102 | 0.06283 | 0.161 | -4.61 | 1.9152  | none       |
| AGRN      | 0.351  | 0.2839  | 2.102  | 0.06284 | 0.161 | -4.61 | -0.8785 | none       |
| GPR3      | 0.275  | 0.2027  | 2.1017 | 0.06287 | 0.162 | -4.61 | -0.3484 | none       |
| THOC2     | 0.621  | 0.6926  | 2.1017 | 0.06288 | 0.162 | -4.61 | -0.2841 | none       |
| ZNF174    | 0.241  | 0.1859  | 2.1014 | 0.06291 | 0.162 | -4.61 | -1.0946 | none       |
| PAAF1     | 0.271  | 0.1171  | 2.101  | 0.06294 | 0.162 | -4.61 | -0.6523 | none       |
| DAZAP1    | 0.299  | 0.3162  | 2.101  | 0.06295 | 0.162 | -4.61 | -0.9127 | none       |
| NOTCH1    | 0.484  | 0.5438  | 2.1007 | 0.06298 | 0.162 | -4.61 | -0.7581 | none       |
| TUB       | 0.213  | 0.2049  | 2.1005 | 0.063   | 0.162 | -4.61 | -0.1497 | none       |
| CD80      | 0.383  | 0.217   | 2.0996 | 0.0631  | 0.162 | -4.62 | 0.23039 | none       |
| CTNND2    | -0.256 | -0.2053 | -2.099 | 0.06311 | 0.162 | -4.62 | 2.22677 | AA-related |
| TMBIM4    | -0.327 | -0.3772 | -2.099 | 0.06314 | 0.162 | -4.62 | 1.12894 | none       |
| MAL2      | -0.254 | -0.2632 | -2.099 | 0.06315 | 0.162 | -4.62 | 1.59001 | none       |
| GATC      | 0.352  | 0.3104  | 2.099  | 0.06315 | 0.162 | -4.62 | -1.2109 | none       |
| CAPN3     | 0.362  | 0.3144  | 2.099  | 0.06316 | 0.162 | -4.62 | 0.50215 | none       |
| IRF2BP2   | 0.334  | 0.2701  | 2.0984 | 0.06322 | 0.162 | -4.62 | -1.0636 | none       |
| ATP2C1    | 0.242  | 0.1645  | 2.0983 | 0.06324 | 0.162 | -4.62 | 0.56782 | none       |
| AL354822. | 0.24   | 0.2111  | 2.0981 | 0.06326 | 0.162 | -4.62 | -1.4135 | none       |
| NLE1      | 0.233  | 0.2407  | 2.097  | 0.06337 | 0.162 | -4.62 | 0.68911 | none       |
| GEN1      | 0.485  | 0.5526  | 2.0964 | 0.06343 | 0.163 | -4.62 | 0.64337 | none       |
| MBLAC2    | 0.234  | 0.2026  | 2.0964 | 0.06343 | 0.163 | -4.62 | 0.36678 | none       |
| C1ORF54   | 0.474  | 0.3855  | 2.0961 | 0.06346 | 0.163 | -4.62 | -0.558  | none       |
| CCDC114   | 0.312  | 0.2817  | 2.0959 | 0.06348 | 0.163 | -4.62 | -0.7244 | none       |



|          |        |         |        |         |       |       |         |      |
|----------|--------|---------|--------|---------|-------|-------|---------|------|
| FBXL5    | -0.297 | -0.3067 | -2.096 | 0.06348 | 0.163 | -4.62 | 1.33421 | none |
| S100A4   | -0.642 | -0.7168 | -2.096 | 0.0635  | 0.163 | -4.62 | 1.6017  | none |
| SLC41A2  | 0.259  | 0.1335  | 2.0953 | 0.06355 | 0.163 | -4.62 | -0.4411 | none |
| SHCBP1   | 0.254  | 0.1962  | 2.0949 | 0.06359 | 0.163 | -4.62 | -0.4068 | none |
| NDUFV2   | -0.287 | -0.2926 | -2.095 | 0.0636  | 0.163 | -4.62 | 0.47728 | none |
| P4HA2    | 0.632  | 0.5536  | 2.0944 | 0.06364 | 0.163 | -4.62 | -0.9712 | none |
| CYP1B1   | -0.307 | -0.2418 | -2.094 | 0.06367 | 0.163 | -4.62 | 0.13729 | none |
| CDC16    | 0.26   | 0.2095  | 2.0939 | 0.0637  | 0.163 | -4.62 | 0.15703 | none |
| KCNA3    | 0.271  | 0.2293  | 2.0935 | 0.06374 | 0.163 | -4.63 | 0.00855 | none |
| HNRNPC   | -0.176 | -0.1434 | -2.093 | 0.06374 | 0.163 | -4.63 | 1.17381 | none |
| RPLP0    | -0.333 | -0.3277 | -2.093 | 0.06375 | 0.163 | -4.63 | 1.07481 | none |
| RHOJ     | 0.225  | 0.1604  | 2.0929 | 0.0638  | 0.163 | -4.63 | -0.9907 | none |
| RDH12    | 0.33   | 0.2542  | 2.0919 | 0.06391 | 0.163 | -4.63 | -1.1136 | none |
| MED23    | 0.397  | 0.3181  | 2.0917 | 0.06393 | 0.163 | -4.63 | -0.8213 | none |
| KMT2B    | 0.449  | 0.5554  | 2.0911 | 0.064   | 0.164 | -4.63 | 0.06542 | none |
| DNMT3A   | 0.306  | 0.3194  | 2.0911 | 0.064   | 0.164 | -4.63 | -0.0301 | none |
| BCAN     | 0.522  | 0.4571  | 2.0909 | 0.06401 | 0.164 | -4.63 | 0.71275 | none |
| GPR4     | 0.235  | 0.1534  | 2.0904 | 0.06406 | 0.164 | -4.63 | -1.4157 | none |
| PRRG1    | 0.236  | 0.1824  | 2.0904 | 0.06407 | 0.164 | -4.63 | -0.5597 | none |
| MCM8     | 0.438  | 0.4406  | 2.0901 | 0.0641  | 0.164 | -4.63 | -1.0777 | none |
| EXOC3L1  | -0.172 | -0.1683 | -2.09  | 0.0641  | 0.164 | -4.63 | -0.2289 | none |
| OSBPL3   | 0.357  | 0.3278  | 2.0894 | 0.06417 | 0.164 | -4.63 | -0.8218 | none |
| RBPJL    | -0.189 | -0.1245 | -2.089 | 0.06418 | 0.164 | -4.63 | 0.25699 | none |
| SEMA4G   | 0.239  | 0.2506  | 2.0892 | 0.06419 | 0.164 | -4.63 | 1.29656 | none |
| AGMO     | 0.497  | 0.3185  | 2.089  | 0.06422 | 0.164 | -4.63 | -1.1602 | none |
| COX5A    | -0.296 | -0.2925 | -2.088 | 0.06428 | 0.164 | -4.63 | 1.77543 | none |
| DONSON   | 0.393  | 0.3159  | 2.0879 | 0.06433 | 0.164 | -4.63 | 0.34288 | none |
| KRTCAP2  | -0.472 | -0.4931 | -2.088 | 0.06436 | 0.164 | -4.63 | 1.5658  | none |
| ASIC4    | 0.151  | 0.1207  | 2.0876 | 0.06436 | 0.164 | -4.63 | -1.1571 | none |
| MRPL33   | -0.32  | -0.3306 | -2.088 | 0.06437 | 0.164 | -4.63 | 1.21277 | none |
| ZNF491   | 0.28   | 0.1888  | 2.0875 | 0.06438 | 0.164 | -4.63 | 0.07178 | none |
| TMIGD3   | -0.258 | -0.2526 | -2.087 | 0.06442 | 0.164 | -4.64 | 0.54856 | none |
| FHOD3    | 0.284  | 0.2096  | 2.0865 | 0.06448 | 0.164 | -4.64 | -1.014  | none |
| NDN      | -0.225 | -0.1769 | -2.086 | 0.06449 | 0.164 | -4.64 | 1.48309 | none |
| HEATR3   | 0.455  | 0.4594  | 2.0864 | 0.0645  | 0.164 | -4.64 | 0.12676 | none |
| MAK      | 0.254  | 0.2416  | 2.0858 | 0.06456 | 0.164 | -4.64 | -0.6478 | none |
| FKBP1A   | -0.292 | -0.2949 | -2.086 | 0.06458 | 0.164 | -4.64 | 1.94065 | none |
| PDS5A    | 0.455  | 0.4471  | 2.0851 | 0.06463 | 0.165 | -4.64 | -0.8863 | none |
| DHH      | 0.241  | 0.1679  | 2.0849 | 0.06465 | 0.165 | -4.64 | -1.2552 | none |
| ADAMTSL1 | 0.268  | 0.189   | 2.0849 | 0.06465 | 0.165 | -4.64 | -1.4607 | none |

|                      |        |         |        |         |       |       |         |            |
|----------------------|--------|---------|--------|---------|-------|-------|---------|------------|
| CAB39L               | 0.294  | 0.1647  | 2.0849 | 0.06465 | 0.165 | -4.64 | -0.1794 | none       |
| C1ORF194             | 0.218  | 0.1793  | 2.0847 | 0.06467 | 0.165 | -4.64 | 0.82531 | none       |
| CEP152               | 0.685  | 0.5625  | 2.0846 | 0.06469 | 0.165 | -4.64 | -0.9776 | none       |
| INCENP               | 0.498  | 0.6415  | 2.0844 | 0.06471 | 0.165 | -4.64 | -0.1942 | none       |
| PKN2                 | 0.447  | 0.4223  | 2.0843 | 0.06472 | 0.165 | -4.64 | -0.8098 | none       |
| FOXO1                | 0.396  | 0.3379  | 2.0841 | 0.06474 | 0.165 | -4.64 | -0.3727 | none       |
| RPS20                | -0.456 | -0.4816 | -2.084 | 0.06479 | 0.165 | -4.64 | 1.06939 | none       |
| MSRB3                | 0.581  | 0.3108  | 2.0833 | 0.06483 | 0.165 | -4.64 | -1.0118 | none       |
| CHMP2B               | -0.289 | -0.251  | -2.083 | 0.06489 | 0.165 | -4.64 | 1.37117 | none       |
| SRSF10               | 0.173  | 0.0871  | 2.0825 | 0.06491 | 0.165 | -4.64 | -0.0836 | none       |
| CDHR2                | 0.254  | 0.2214  | 2.0823 | 0.06493 | 0.165 | -4.64 | 0.3994  | none       |
| RAP1A                | -0.283 | -0.3049 | -2.082 | 0.06493 | 0.165 | -4.64 | 1.38843 | none       |
| GALNT11              | 0.217  | 0.1713  | 2.0822 | 0.06494 | 0.165 | -4.64 | 0.6371  | none       |
| ZIK1                 | 0.212  | 0.1334  | 2.0816 | 0.06501 | 0.165 | -4.64 | 0.54842 | none       |
| PPP1R36              | 0.261  | 0.1327  | 2.0815 | 0.06502 | 0.165 | -4.64 | -0.5348 | none       |
| PSMA3                | -0.289 | -0.3288 | -2.081 | 0.06512 | 0.165 | -4.65 | 1.03407 | none       |
| TMEM206              | -0.457 | -0.3571 | -2.08  | 0.06513 | 0.165 | -4.65 | 2.07118 | none       |
| TCHP                 | 0.543  | 0.5523  | 2.0804 | 0.06514 | 0.165 | -4.65 | -0.8535 | none       |
| NLRP11               | 0.276  | 0.2064  | 2.0804 | 0.06514 | 0.165 | -4.65 | -1.2603 | none       |
| CREB5                | 0.493  | 0.3602  | 2.0799 | 0.06519 | 0.165 | -4.65 | -1.1756 | none       |
| ZBTB38               | 0.631  | 0.6312  | 2.0798 | 0.06521 | 0.165 | -4.65 | 0.11609 | none       |
| ING4                 | -0.356 | -0.3375 | -2.08  | 0.06522 | 0.165 | -4.65 | 0.18386 | none       |
| METTL3               | 0.229  | 0.1675  | 2.0794 | 0.06524 | 0.165 | -4.65 | -0.6322 | none       |
| TMEM50A              | -0.337 | -0.3808 | -2.079 | 0.06524 | 0.165 | -4.65 | 1.06339 | none       |
| NDUFA12              | -0.251 | -0.2602 | -2.079 | 0.06526 | 0.165 | -4.65 | 0.15961 | none       |
| GCH1                 | -0.313 | -0.3127 | -2.079 | 0.06526 | 0.165 | -4.65 | 1.7481  | none       |
| TCEA1                | -0.191 | -0.1797 | -2.079 | 0.06528 | 0.166 | -4.65 | 1.7279  | none       |
| ERVMER3 <sup>d</sup> | 0.344  | 0.2537  | 2.0789 | 0.0653  | 0.166 | -4.65 | 0.71737 | none       |
| CLC                  | -0.29  | -0.3936 | -2.079 | 0.06531 | 0.166 | -4.65 | 0.17406 | none       |
| HECTD3               | 0.311  | 0.3145  | 2.0785 | 0.06534 | 0.166 | -4.65 | 0.31412 | none       |
| POLR2J               | -0.3   | -0.2676 | -2.079 | 0.06534 | 0.166 | -4.65 | 2.20959 | AA-related |
| IFIH1                | 0.558  | 0.5877  | 2.0783 | 0.06536 | 0.166 | -4.65 | -0.0593 | none       |
| POLR1E               | 0.298  | 0.3157  | 2.0769 | 0.06552 | 0.166 | -4.65 | -0.3654 | none       |
| ZNF92                | 0.397  | 0.3501  | 2.0765 | 0.06556 | 0.166 | -4.65 | -0.0747 | none       |
| SAR1B                | 0.269  | 0.0802  | 2.0763 | 0.06558 | 0.166 | -4.65 | -0.6236 | none       |
| TRAF2                | 0.254  | 0.2407  | 2.0763 | 0.06558 | 0.166 | -4.65 | -0.9203 | none       |
| INPP4A               | 0.383  | 0.3495  | 2.0761 | 0.0656  | 0.166 | -4.65 | -0.423  | none       |
| CXORF21              | 0.182  | 0.1125  | 2.0755 | 0.06567 | 0.166 | -4.65 | 0.14826 | none       |
| ERAS                 | 0.161  | 0.1661  | 2.0754 | 0.06568 | 0.166 | -4.65 | 0.05986 | none       |
| RNF111               | 0.667  | 0.5871  | 2.0749 | 0.06573 | 0.166 | -4.65 | -0.6494 | none       |

|          |        |         |        |         |       |       |         |      |
|----------|--------|---------|--------|---------|-------|-------|---------|------|
| SNTG2    | 0.487  | 0.3627  | 2.0747 | 0.06576 | 0.166 | -4.65 | -1.186  | none |
| PELI1    | 0.3    | 0.174   | 2.0746 | 0.06577 | 0.166 | -4.65 | -0.1336 | none |
| UBE2Q1   | -0.309 | -0.1658 | -2.074 | 0.06588 | 0.167 | -4.66 | 1.53623 | none |
| F7       | 0.305  | 0.3024  | 2.0735 | 0.06589 | 0.167 | -4.66 | -0.2873 | none |
| MAST2    | 0.397  | 0.4272  | 2.073  | 0.06594 | 0.167 | -4.66 | -0.2375 | none |
| KLF4     | 0.316  | 0.2227  | 2.0729 | 0.06596 | 0.167 | -4.66 | -0.8173 | none |
| CDC40    | 0.703  | 0.5402  | 2.0719 | 0.06606 | 0.167 | -4.66 | -0.8025 | none |
| PATE2    | 0.351  | 0.2451  | 2.0719 | 0.06607 | 0.167 | -4.66 | -1.3521 | none |
| FAM102B  | 0.222  | 0.2298  | 2.0717 | 0.06609 | 0.167 | -4.66 | 0.21674 | none |
| GDNF     | 0.181  | 0.1292  | 2.0713 | 0.06613 | 0.167 | -4.66 | -1.0683 | none |
| SSR4     | -0.449 | -0.4552 | -2.071 | 0.06613 | 0.167 | -4.66 | 1.4453  | none |
| STAU1    | 0.408  | 0.4292  | 2.0712 | 0.06614 | 0.167 | -4.66 | -0.9117 | none |
| SSX5     | -0.459 | -0.3761 | -2.071 | 0.06616 | 0.167 | -4.66 | 1.67207 | none |
| CCL27    | 0.225  | 0.221   | 2.0707 | 0.06619 | 0.167 | -4.66 | 0.10719 | none |
| SCAF11   | 0.563  | 0.6212  | 2.0706 | 0.06621 | 0.167 | -4.66 | -0.5828 | none |
| PCF11    | 0.416  | 0.419   | 2.0701 | 0.06626 | 0.167 | -4.66 | -0.3504 | none |
| KLHL21   | 0.238  | 0.2237  | 2.0697 | 0.06631 | 0.167 | -4.66 | -0.3737 | none |
| XIRP1    | 0.567  | 0.7489  | 2.0694 | 0.06634 | 0.167 | -4.66 | -0.4769 | none |
| GDPD2    | 0.219  | 0.1729  | 2.0688 | 0.0664  | 0.168 | -4.66 | 0.26649 | none |
| DOHH     | 0.267  | 0.2676  | 2.068  | 0.06649 | 0.168 | -4.66 | 0.20489 | none |
| IL3RA    | -0.208 | -0.2335 | -2.068 | 0.06652 | 0.168 | -4.67 | 1.27494 | none |
| PCGF1    | 0.264  | 0.1878  | 2.0677 | 0.06653 | 0.168 | -4.67 | -0.5447 | none |
| MTR      | 0.638  | 0.6441  | 2.0676 | 0.06653 | 0.168 | -4.67 | -0.4813 | none |
| SPEN     | 0.594  | 0.7684  | 2.0676 | 0.06654 | 0.168 | -4.67 | -0.4606 | none |
| ERVV-2   | 0.249  | 0.1888  | 2.067  | 0.0666  | 0.168 | -4.67 | -0.8816 | none |
| FAM89B   | -0.451 | -0.3482 | -2.067 | 0.06661 | 0.168 | -4.67 | 1.99656 | none |
| CYSLTR2  | -0.334 | -0.2595 | -2.067 | 0.06664 | 0.168 | -4.67 | 0.23564 | none |
| TMEM11   | -0.207 | -0.1813 | -2.067 | 0.06665 | 0.168 | -4.67 | 1.54342 | none |
| HLA-DPA1 | 0.26   | 0.1452  | 2.0665 | 0.06666 | 0.168 | -4.67 | -0.6282 | none |
| RPL35    | -0.312 | -0.2942 | -2.066 | 0.06672 | 0.168 | -4.67 | 0.75998 | none |
| BIRC3    | 0.365  | 0.3689  | 2.0658 | 0.06674 | 0.168 | -4.67 | -0.9341 | none |
| RNF216   | 0.429  | 0.4759  | 2.0655 | 0.06677 | 0.168 | -4.67 | -0.7071 | none |
| OGFOD2   | 0.291  | 0.2507  | 2.0652 | 0.0668  | 0.168 | -4.67 | -1.0305 | none |
| PTRH1    | 0.322  | 0.1959  | 2.0651 | 0.06681 | 0.168 | -4.67 | -0.9683 | none |
| MAGEA4   | -0.184 | -0.1632 | -2.065 | 0.06682 | 0.168 | -4.67 | 1.69427 | none |
| RPL28    | -0.414 | -0.4412 | -2.065 | 0.06686 | 0.168 | -4.67 | 2.08357 | none |
| SP110    | 0.68   | 0.707   | 2.0641 | 0.06693 | 0.168 | -4.67 | -0.274  | none |
| IK       | 0.626  | 0.6112  | 2.064  | 0.06694 | 0.168 | -4.67 | -0.5784 | none |
| MYO18A   | 0.506  | 0.557   | 2.0636 | 0.06698 | 0.168 | -4.67 | -0.3198 | none |
| N6AMT1   | -0.286 | -0.3303 | -2.063 | 0.06699 | 0.169 | -4.67 | 1.54196 | none |

|           |        |         |        |         |       |       |         |            |
|-----------|--------|---------|--------|---------|-------|-------|---------|------------|
| IST1      | 0.183  | 0.1028  | 2.0634 | 0.067   | 0.169 | -4.67 | -0.7255 | none       |
| TUBB2A    | 0.314  | 0.2013  | 2.063  | 0.06705 | 0.169 | -4.67 | -0.0762 | none       |
| AK4       | -0.309 | -0.2215 | -2.063 | 0.06708 | 0.169 | -4.67 | 1.70516 | none       |
| SVIL      | 0.741  | 0.7229  | 2.0626 | 0.06709 | 0.169 | -4.67 | 0.12413 | none       |
| TMEM258   | -0.41  | -0.4069 | -2.062 | 0.06714 | 0.169 | -4.67 | 1.41791 | none       |
| PODXL     | 0.313  | 0.2751  | 2.0619 | 0.06717 | 0.169 | -4.67 | 1.3517  | none       |
| PEBP1     | -0.189 | -0.1612 | -2.061 | 0.06722 | 0.169 | -4.67 | 2.03455 | none       |
| WNT10B    | -0.209 | -0.1896 | -2.06  | 0.06733 | 0.169 | -4.68 | 1.82699 | none       |
| UNC13D    | 0.33   | 0.3355  | 2.0601 | 0.06737 | 0.169 | -4.68 | -0.15   | none       |
| FAM126A   | -0.213 | -0.2369 | -2.06  | 0.06741 | 0.169 | -4.68 | 1.3547  | none       |
| CRYBB3    | 0.26   | 0.2712  | 2.0591 | 0.06748 | 0.169 | -4.68 | 0.65427 | none       |
| TXNDC17   | -0.354 | -0.3411 | -2.059 | 0.0675  | 0.169 | -4.68 | 1.56954 | none       |
| TAF4      | -0.548 | -0.3963 | -2.058 | 0.06756 | 0.17  | -4.68 | 0.78324 | none       |
| RBMX      | 0.216  | 0.179   | 2.0579 | 0.06762 | 0.17  | -4.68 | 0.83223 | none       |
| HKDC1     | 0.184  | 0.1887  | 2.0571 | 0.0677  | 0.17  | -4.68 | -0.4808 | none       |
| IFT140    | 0.527  | 0.4543  | 2.0571 | 0.0677  | 0.17  | -4.68 | -0.3164 | none       |
| SERF2     | -0.287 | -0.2628 | -2.056 | 0.06777 | 0.17  | -4.68 | 0.77846 | none       |
| RBP1      | 0.475  | 0.3505  | 2.0563 | 0.06779 | 0.17  | -4.68 | -0.1908 | none       |
| DUOX2     | -0.224 | -0.1662 | -2.055 | 0.06791 | 0.17  | -4.68 | 0.50322 | none       |
| ADAT3     | 0.203  | 0.1159  | 2.0552 | 0.06792 | 0.17  | -4.68 | 0.28232 | none       |
| ANKRD33E  | 0.275  | 0.3429  | 2.0552 | 0.06792 | 0.17  | -4.68 | 0.05776 | none       |
| NCR3      | -1.015 | -0.8317 | -2.055 | 0.06794 | 0.17  | -4.68 | 2.39725 | AA-related |
| FH        | -0.151 | -0.1433 | -2.055 | 0.06796 | 0.17  | -4.68 | 2.12034 | AA-related |
| MDN1      | 0.54   | 0.5918  | 2.0538 | 0.06807 | 0.171 | -4.69 | 0.01914 | none       |
| KLHL35    | 0.313  | 0.1558  | 2.0538 | 0.06807 | 0.171 | -4.69 | -0.7702 | none       |
| ASB14     | -0.135 | -0.0572 | -2.054 | 0.06809 | 0.171 | -4.69 | 1.29654 | none       |
| HSD17B10  | -0.232 | -0.2219 | -2.054 | 0.06809 | 0.171 | -4.69 | 2.03025 | none       |
| UBASH3A   | 0.234  | 0.1955  | 2.0533 | 0.06813 | 0.171 | -4.69 | -0.176  | none       |
| SLC6A11   | 0.204  | 0.1649  | 2.0532 | 0.06814 | 0.171 | -4.69 | 1.14947 | none       |
| TUBG2     | 0.19   | 0.2362  | 2.0531 | 0.06816 | 0.171 | -4.69 | 0.50005 | none       |
| AC023491  | 0.247  | 0.1585  | 2.0528 | 0.06819 | 0.171 | -4.69 | -0.3892 | none       |
| SAP130    | 0.572  | 0.5895  | 2.0523 | 0.06825 | 0.171 | -4.69 | -0.2619 | none       |
| LZTS1     | 0.193  | 0.1707  | 2.0516 | 0.06833 | 0.171 | -4.69 | -0.5991 | none       |
| TMTC3     | 0.27   | 0.2679  | 2.051  | 0.06839 | 0.171 | -4.69 | -0.747  | none       |
| TNFRSF10I | 0.211  | 0.1707  | 2.051  | 0.0684  | 0.171 | -4.69 | 1.26964 | none       |
| RAG1      | -0.276 | -0.2323 | -2.051 | 0.06845 | 0.171 | -4.69 | -0.3741 | none       |
| HEPH      | -0.15  | -0.1406 | -2.05  | 0.0685  | 0.171 | -4.69 | 1.52926 | none       |
| ATP6V0E2  | -0.157 | -0.1724 | -2.05  | 0.06853 | 0.171 | -4.69 | 1.88746 | none       |
| ACSM2B    | 0.503  | 0.3953  | 2.0497 | 0.06854 | 0.171 | -4.69 | 0.36021 | none       |
| FAM86C1   | 0.253  | 0.2358  | 2.0494 | 0.06858 | 0.171 | -4.69 | -0.0111 | none       |

|          |        |         |        |         |       |       |         |            |
|----------|--------|---------|--------|---------|-------|-------|---------|------------|
| ZNF32    | -0.208 | -0.2072 | -2.049 | 0.06858 | 0.171 | -4.69 | 2.42846 | AA-related |
| PGBD5    | 0.195  | 0.1168  | 2.0492 | 0.0686  | 0.171 | -4.69 | -0.6537 | none       |
| CKS1B    | -0.263 | -0.2738 | -2.049 | 0.06864 | 0.172 | -4.69 | 1.79771 | none       |
| DCTD     | -0.21  | -0.1919 | -2.048 | 0.06868 | 0.172 | -4.69 | 2.40391 | AA-related |
| UXT      | -0.401 | -0.4243 | -2.048 | 0.06869 | 0.172 | -4.69 | 1.84449 | none       |
| OARD1    | -0.213 | -0.222  | -2.048 | 0.06876 | 0.172 | -4.7  | 0.95157 | none       |
| GIN1     | 0.415  | 0.3013  | 2.0473 | 0.06881 | 0.172 | -4.7  | 0.12187 | none       |
| PARP11   | 0.205  | 0.0891  | 2.0472 | 0.06882 | 0.172 | -4.7  | -0.4333 | none       |
| DGCR2    | 0.325  | 0.3114  | 2.0472 | 0.06882 | 0.172 | -4.7  | 0.73923 | none       |
| RAVER1   | 0.381  | 0.3668  | 2.0469 | 0.06886 | 0.172 | -4.7  | 0.21596 | none       |
| ATF6     | 0.296  | 0.2563  | 2.0459 | 0.06897 | 0.172 | -4.7  | -0.509  | none       |
| KIF23    | 0.559  | 0.5333  | 2.0452 | 0.06906 | 0.172 | -4.7  | -0.5487 | none       |
| ZEB1     | 0.639  | 0.6831  | 2.0451 | 0.06906 | 0.172 | -4.7  | -0.6024 | none       |
| ICA1     | 0.284  | 0.2006  | 2.0448 | 0.06909 | 0.172 | -4.7  | -0.2375 | none       |
| EFNA4    | -0.226 | -0.2638 | -2.045 | 0.06911 | 0.172 | -4.7  | 1.05635 | none       |
| TFF2     | 0.391  | 0.3994  | 2.0446 | 0.06912 | 0.172 | -4.7  | -0.0312 | none       |
| TAP1     | -0.298 | -0.2678 | -2.045 | 0.06912 | 0.172 | -4.7  | 1.77166 | none       |
| COQ8A    | 0.25   | 0.2389  | 2.0443 | 0.06916 | 0.172 | -4.7  | 0.21582 | none       |
| RP9      | -0.27  | -0.1055 | -2.044 | 0.06924 | 0.173 | -4.7  | 1.01511 | none       |
| RPS28    | -0.49  | -0.522  | -2.043 | 0.06925 | 0.173 | -4.7  | 1.86863 | none       |
| CUL4A    | 0.21   | 0.2213  | 2.0434 | 0.06925 | 0.173 | -4.7  | 0.68849 | none       |
| GIMAP5   | -0.193 | -0.2178 | -2.043 | 0.06926 | 0.173 | -4.7  | 0.44916 | none       |
| MEI1     | 0.504  | 0.2941  | 2.0422 | 0.06939 | 0.173 | -4.7  | -0.6933 | none       |
| GOLGA6L6 | 0.364  | 0.2514  | 2.0421 | 0.0694  | 0.173 | -4.7  | -0.6303 | none       |
| KRTAP4-7 | 0.19   | 0.1515  | 2.0419 | 0.06943 | 0.173 | -4.7  | -0.6791 | none       |
| MMP15    | 0.249  | 0.2534  | 2.0419 | 0.06944 | 0.173 | -4.7  | 1.09527 | none       |
| RNF130   | 0.195  | 0.1507  | 2.0415 | 0.06947 | 0.173 | -4.71 | -0.0554 | none       |
| RPL23    | -0.378 | -0.4057 | -2.041 | 0.06951 | 0.173 | -4.71 | 1.48084 | none       |
| CENPH    | 0.315  | 0.1974  | 2.0412 | 0.06951 | 0.173 | -4.71 | -0.4321 | none       |
| SUN2     | 0.312  | 0.3505  | 2.041  | 0.06954 | 0.173 | -4.71 | -0.6406 | none       |
| CAPN15   | 0.364  | 0.4649  | 2.0395 | 0.0697  | 0.173 | -4.71 | -0.2323 | none       |
| KPTN     | 0.464  | 0.4283  | 2.0392 | 0.06974 | 0.174 | -4.71 | -0.1193 | none       |
| PPIH     | -0.302 | -0.3125 | -2.039 | 0.06976 | 0.174 | -4.71 | 1.54974 | none       |
| PPM1N    | 0.517  | 0.3081  | 2.0377 | 0.06991 | 0.174 | -4.71 | -0.8557 | none       |
| ZNF304   | 0.158  | 0.1171  | 2.0369 | 0.07001 | 0.174 | -4.71 | 0.53582 | none       |
| RAB20    | -0.375 | -0.3453 | -2.037 | 0.07005 | 0.174 | -4.71 | 1.55407 | none       |
| GINS2    | -0.202 | -0.1707 | -2.036 | 0.07007 | 0.174 | -4.71 | 1.47064 | none       |
| GUCD1    | 0.285  | 0.2946  | 2.0359 | 0.07012 | 0.174 | -4.71 | -0.5572 | none       |
| CCDC175  | 0.471  | 0.3851  | 2.0359 | 0.07012 | 0.174 | -4.71 | 0.08509 | none       |
| RPL32    | -0.351 | -0.3743 | -2.036 | 0.07014 | 0.174 | -4.71 | 2.26519 | AA-related |

|          |        |         |        |         |       |       |         |            |
|----------|--------|---------|--------|---------|-------|-------|---------|------------|
| NUDT15   | 0.285  | 0.1407  | 2.0357 | 0.07015 | 0.174 | -4.71 | -0.1337 | none       |
| GOLGA6L4 | 0.455  | 0.3877  | 2.0355 | 0.07017 | 0.174 | -4.71 | -0.5784 | none       |
| ANKRD27  | 0.585  | 0.6067  | 2.035  | 0.07022 | 0.174 | -4.72 | -0.1492 | none       |
| MIEF1    | 0.209  | 0.2046  | 2.0348 | 0.07025 | 0.175 | -4.72 | 0.14336 | none       |
| VRK2     | 0.364  | 0.359   | 2.0347 | 0.07026 | 0.175 | -4.72 | -0.3375 | none       |
| RSRC1    | 0.444  | 0.3848  | 2.0343 | 0.07031 | 0.175 | -4.72 | -0.6485 | none       |
| RALB     | 0.24   | 0.1128  | 2.0337 | 0.07037 | 0.175 | -4.72 | -0.7248 | none       |
| ANKRD18E | 0.432  | 0.2956  | 2.0335 | 0.07041 | 0.175 | -4.72 | -0.7636 | none       |
| ZIC4     | 0.223  | 0.2226  | 2.0335 | 0.07041 | 0.175 | -4.72 | 0.08485 | none       |
| ZKSCAN5  | 0.447  | 0.4484  | 2.0334 | 0.07041 | 0.175 | -4.72 | -0.9196 | none       |
| RPS13    | -0.408 | -0.4482 | -2.033 | 0.07043 | 0.175 | -4.72 | 1.36386 | none       |
| GPX2     | 0.385  | 0.2346  | 2.0326 | 0.07051 | 0.175 | -4.72 | -1.0476 | none       |
| SCGB3A1  | -0.518 | -0.4601 | -2.033 | 0.07052 | 0.175 | -4.72 | 2.27702 | AA-related |
| VAMP2    | 0.22   | 0.158   | 2.0325 | 0.07052 | 0.175 | -4.72 | -0.3086 | none       |
| NBPF1    | 0.339  | 0.3175  | 2.032  | 0.07057 | 0.175 | -4.72 | -0.4532 | none       |
| HSD17B7  | -0.264 | -0.2406 | -2.032 | 0.07059 | 0.175 | -4.72 | 0.74455 | none       |
| MVP      | 0.352  | 0.3497  | 2.0316 | 0.07062 | 0.175 | -4.72 | -0.9865 | none       |
| CSNK2A2  | 0.448  | 0.4477  | 2.0315 | 0.07063 | 0.175 | -4.72 | -0.9599 | none       |
| BCL7B    | 0.313  | 0.2049  | 2.0307 | 0.07073 | 0.175 | -4.72 | -0.6581 | none       |
| TBC1D19  | 0.261  | 0.0949  | 2.0306 | 0.07074 | 0.175 | -4.72 | -0.2224 | none       |
| GPR61    | -0.239 | -0.1483 | -2.031 | 0.07075 | 0.175 | -4.72 | 2.2177  | AA-related |
| TUBA1A   | -0.278 | -0.3729 | -2.031 | 0.07075 | 0.175 | -4.72 | 1.07845 | none       |
| SLC2A6   | 0.253  | 0.2065  | 2.03   | 0.07081 | 0.175 | -4.72 | 0.64197 | none       |
| GPR182   | 0.274  | 0.2507  | 2.0299 | 0.07083 | 0.175 | -4.72 | 0.04892 | none       |
| SRRM5    | 0.165  | 0.1482  | 2.0295 | 0.07087 | 0.175 | -4.72 | -1.3125 | none       |
| REEP5    | -0.278 | -0.3024 | -2.03  | 0.07087 | 0.175 | -4.72 | 1.39639 | none       |
| PDCD6IP  | 0.36   | 0.324   | 2.0295 | 0.07087 | 0.175 | -4.72 | 0.32275 | none       |
| SPATA9   | -0.167 | -0.1591 | -2.029 | 0.07093 | 0.176 | -4.72 | -0.2759 | none       |
| NPIP7    | 0.214  | 0.1779  | 2.0289 | 0.07094 | 0.176 | -4.72 | 0.89348 | none       |
| COX19    | 0.296  | 0.2361  | 2.0286 | 0.07097 | 0.176 | -4.73 | -0.2992 | none       |
| UBASH3B  | 0.264  | 0.278   | 2.0283 | 0.07101 | 0.176 | -4.73 | 0.79109 | none       |
| NFATC3   | 0.305  | 0.2922  | 2.0281 | 0.07103 | 0.176 | -4.73 | -0.3278 | none       |
| OR52K1   | 0.18   | 0.1424  | 2.0279 | 0.07105 | 0.176 | -4.73 | -1.0896 | none       |
| HOOK1    | 0.53   | 0.4449  | 2.0279 | 0.07106 | 0.176 | -4.73 | -0.3153 | none       |
| BTN2A1   | 0.263  | 0.2344  | 2.0277 | 0.07108 | 0.176 | -4.73 | -0.1264 | none       |
| RPS4Y2   | 0.251  | 0.1947  | 2.0276 | 0.07109 | 0.176 | -4.73 | -1.297  | none       |
| DLGAP4   | 0.569  | 0.6064  | 2.0261 | 0.07127 | 0.176 | -4.73 | -0.1571 | none       |
| RPS12    | -0.495 | -0.549  | -2.026 | 0.07128 | 0.176 | -4.73 | 1.89743 | none       |
| PDCD5    | -0.157 | -0.1354 | -2.026 | 0.07128 | 0.176 | -4.73 | 1.81052 | none       |
| SLC39A9  | -0.249 | -0.2287 | -2.026 | 0.07132 | 0.176 | -4.73 | 1.99065 | none       |

|          |        |         |        |         |       |       |         |            |
|----------|--------|---------|--------|---------|-------|-------|---------|------------|
| CLIC4    | -0.302 | -0.231  | -2.025 | 0.07139 | 0.176 | -4.73 | 0.916   | none       |
| STRIP1   | 0.229  | 0.2547  | 2.0251 | 0.07139 | 0.176 | -4.73 | -0.6214 | none       |
| RNF121   | 0.286  | 0.2023  | 2.0249 | 0.07141 | 0.176 | -4.73 | -0.392  | none       |
| INPP5J   | -0.16  | -0.1064 | -2.024 | 0.07146 | 0.176 | -4.73 | 0.22784 | none       |
| LAPTM5   | -0.198 | -0.1948 | -2.024 | 0.07152 | 0.177 | -4.73 | 1.70339 | none       |
| SH3GLB1  | -0.344 | -0.2602 | -2.023 | 0.07164 | 0.177 | -4.73 | 2.32764 | AA-related |
| IFITM3   | 0.249  | 0.146   | 2.0229 | 0.07164 | 0.177 | -4.73 | -0.7449 | none       |
| TEN1     | 0.416  | 0.3321  | 2.0228 | 0.07165 | 0.177 | -4.73 | -0.7714 | none       |
| ROR2     | -0.275 | -0.2721 | -2.023 | 0.07166 | 0.177 | -4.73 | 0.09323 | none       |
| CALM2    | -0.233 | -0.25   | -2.023 | 0.07168 | 0.177 | -4.73 | 1.4569  | none       |
| CCER2    | -0.176 | -0.1134 | -2.023 | 0.07169 | 0.177 | -4.73 | 0.637   | none       |
| SRP68    | 0.359  | 0.3739  | 2.0225 | 0.07169 | 0.177 | -4.73 | -0.0616 | none       |
| PARP10   | 0.195  | 0.1584  | 2.0225 | 0.0717  | 0.177 | -4.73 | 0.9961  | none       |
| GAR1     | 0.223  | 0.178   | 2.0223 | 0.07172 | 0.177 | -4.73 | 0.31187 | none       |
| KIF3A    | 0.402  | 0.3342  | 2.0221 | 0.07174 | 0.177 | -4.73 | -0.3289 | none       |
| SLC25A43 | 0.273  | 0.2181  | 2.0219 | 0.07176 | 0.177 | -4.74 | 0.036   | none       |
| DENND1B  | 0.16   | 0.1395  | 2.0209 | 0.07188 | 0.177 | -4.74 | 0.22619 | none       |
| SH2B3    | 0.402  | 0.4196  | 2.0208 | 0.0719  | 0.177 | -4.74 | -0.0292 | none       |
| C19ORF66 | 0.205  | 0.1502  | 2.0202 | 0.07196 | 0.177 | -4.74 | 0.41747 | none       |
| RAB6B    | 0.177  | 0.1583  | 2.0198 | 0.07201 | 0.177 | -4.74 | -0.61   | none       |
| APOL6    | 0.591  | 0.5866  | 2.0195 | 0.07205 | 0.177 | -4.74 | -0.77   | none       |
| TMCO3    | 0.358  | 0.2211  | 2.0193 | 0.07207 | 0.178 | -4.74 | -0.4933 | none       |
| RPS4X    | -0.332 | -0.3423 | -2.019 | 0.07209 | 0.178 | -4.74 | 2.12062 | AA-related |
| TXNIP    | -0.306 | -0.3229 | -2.019 | 0.07214 | 0.178 | -4.74 | 0.73858 | none       |
| GOLT1B   | -0.462 | -0.4705 | -2.018 | 0.07217 | 0.178 | -4.74 | 1.16655 | none       |
| MVD      | 0.208  | 0.2038  | 2.0181 | 0.07221 | 0.178 | -4.74 | -0.4401 | none       |
| PRAC1    | -0.301 | -0.2406 | -2.018 | 0.07224 | 0.178 | -4.74 | 2.01689 | none       |
| DHDDS    | 0.181  | 0.173   | 2.0178 | 0.07225 | 0.178 | -4.74 | -0.8886 | none       |
| NFKBIA   | -0.267 | -0.1503 | -2.017 | 0.0723  | 0.178 | -4.74 | 1.40545 | none       |
| UNC119   | -0.182 | -0.1656 | -2.017 | 0.07231 | 0.178 | -4.74 | 1.28102 | none       |
| NDUFA11  | -0.41  | -0.4118 | -2.017 | 0.07233 | 0.178 | -4.74 | 1.96207 | none       |
| PNPLA8   | 0.449  | 0.4005  | 2.0171 | 0.07234 | 0.178 | -4.74 | -0.4817 | none       |
| USF2     | 0.35   | 0.3367  | 2.0169 | 0.07236 | 0.178 | -4.74 | -0.4848 | none       |
| SEBOX    | 0.269  | 0.2764  | 2.0169 | 0.07236 | 0.178 | -4.74 | 0.99877 | none       |
| ORM1     | 0.298  | 0.2314  | 2.0167 | 0.07238 | 0.178 | -4.74 | 0.37999 | none       |
| CYB5R3   | 0.273  | 0.2739  | 2.0166 | 0.07239 | 0.178 | -4.74 | -0.3797 | none       |
| C19ORF53 | -0.193 | -0.154  | -2.017 | 0.0724  | 0.178 | -4.74 | 0.46643 | none       |
| FKBPL    | -0.153 | -0.1034 | -2.017 | 0.0724  | 0.178 | -4.74 | 0.55885 | none       |
| TNK2     | 0.368  | 0.4618  | 2.0163 | 0.07243 | 0.178 | -4.74 | -0.2719 | none       |
| NT5C2    | 0.305  | 0.2262  | 2.0163 | 0.07243 | 0.178 | -4.74 | -0.9698 | none       |

|          |        |         |        |         |       |       |         |            |
|----------|--------|---------|--------|---------|-------|-------|---------|------------|
| GPAT4    | 0.239  | 0.1908  | 2.0159 | 0.07248 | 0.178 | -4.74 | 0.19476 | none       |
| DHPS     | 0.173  | 0.105   | 2.0159 | 0.07248 | 0.178 | -4.74 | 0.18568 | none       |
| EXOC7    | 0.404  | 0.4339  | 2.0151 | 0.07258 | 0.178 | -4.75 | -0.1836 | none       |
| DMXL2    | 0.355  | 0.315   | 2.015  | 0.07259 | 0.178 | -4.75 | -0.7133 | none       |
| PRMT7    | 0.214  | 0.2215  | 2.0149 | 0.0726  | 0.178 | -4.75 | -0.7926 | none       |
| ELP6     | 0.267  | 0.17    | 2.0149 | 0.0726  | 0.178 | -4.75 | -0.7409 | none       |
| ZNF862   | 0.279  | 0.2882  | 2.0147 | 0.07262 | 0.178 | -4.75 | 0.79504 | none       |
| MGLL     | 0.316  | 0.2759  | 2.0147 | 0.07262 | 0.178 | -4.75 | -0.4707 | none       |
| AHI1     | 0.525  | 0.541   | 2.0139 | 0.07272 | 0.178 | -4.75 | -0.8905 | none       |
| PHLDB3   | 0.415  | 0.3718  | 2.0136 | 0.07275 | 0.178 | -4.75 | -0.7266 | none       |
| RAD23A   | 0.231  | 0.2174  | 2.0136 | 0.07275 | 0.178 | -4.75 | -1.254  | none       |
| E2F5     | 0.209  | 0.0712  | 2.0135 | 0.07276 | 0.178 | -4.75 | -0.3999 | none       |
| TBC1D22B | 0.172  | 0.1675  | 2.0131 | 0.07282 | 0.179 | -4.75 | -0.3924 | none       |
| C10ORF67 | 0.263  | 0.1975  | 2.013  | 0.07282 | 0.179 | -4.75 | -1.2628 | none       |
| PMS1     | 0.239  | 0.2159  | 2.013  | 0.07283 | 0.179 | -4.75 | -0.5261 | none       |
| RFXAP    | 0.25   | 0.1377  | 2.0129 | 0.07283 | 0.179 | -4.75 | -0.4528 | none       |
| GEMIN5   | 0.462  | 0.5312  | 2.0119 | 0.07296 | 0.179 | -4.75 | 0.30493 | none       |
| MTTP     | -0.208 | -0.17   | -2.012 | 0.07296 | 0.179 | -4.75 | 1.16327 | none       |
| ZNF439   | 0.354  | 0.2615  | 2.0115 | 0.073   | 0.179 | -4.75 | -1.1967 | none       |
| NR3C2    | -0.333 | -0.1787 | -2.011 | 0.07301 | 0.179 | -4.75 | 1.21182 | none       |
| RABL6    | 0.45   | 0.4943  | 2.0114 | 0.07301 | 0.179 | -4.75 | -0.443  | none       |
| PHACTR2  | 0.725  | 0.7693  | 2.0112 | 0.07304 | 0.179 | -4.75 | -0.5649 | none       |
| RAB32    | -0.223 | -0.2238 | -2.01  | 0.07317 | 0.179 | -4.75 | 0.71154 | none       |
| CLDND2   | -0.335 | -0.2728 | -2.01  | 0.07323 | 0.179 | -4.75 | 1.14982 | none       |
| CEP85    | 0.306  | 0.3127  | 2.0089 | 0.07332 | 0.179 | -4.76 | -0.5502 | none       |
| FAU      | -0.396 | -0.4222 | -2.008 | 0.0734  | 0.18  | -4.76 | 2.26514 | AA-related |
| HAND2    | 0.256  | 0.1943  | 2.0078 | 0.07345 | 0.18  | -4.76 | -0.6799 | none       |
| SNRPE    | -0.288 | -0.3401 | -2.008 | 0.07349 | 0.18  | -4.76 | 1.18545 | none       |
| MT1B     | -0.282 | -0.282  | -2.007 | 0.07349 | 0.18  | -4.76 | -0.1514 | none       |
| SPIN2A   | 0.169  | 0.1058  | 2.0065 | 0.07361 | 0.18  | -4.76 | -0.0376 | none       |
| IL2RG    | -0.248 | -0.2158 | -2.006 | 0.07364 | 0.18  | -4.76 | 1.49555 | none       |
| URM1     | -0.317 | -0.2199 | -2.006 | 0.07365 | 0.18  | -4.76 | 2.41789 | AA-related |
| DAO      | 0.239  | 0.2392  | 2.0055 | 0.07373 | 0.18  | -4.76 | -0.3603 | none       |
| SMC5     | 0.705  | 0.7091  | 2.0055 | 0.07373 | 0.18  | -4.76 | -0.2613 | none       |
| FCGR1B   | 0.159  | 0.1671  | 2.0054 | 0.07374 | 0.18  | -4.76 | 0.60808 | none       |
| GNG5     | -0.279 | -0.2934 | -2.005 | 0.07375 | 0.18  | -4.76 | 1.46912 | none       |
| CFAP77   | 0.271  | 0.1937  | 2.0053 | 0.07376 | 0.18  | -4.76 | -0.7837 | none       |
| GGH      | -0.297 | -0.3324 | -2.005 | 0.07376 | 0.18  | -4.76 | 1.47758 | none       |
| EXOC4    | 0.32   | 0.3725  | 2.0049 | 0.07381 | 0.18  | -4.76 | 0.3196  | none       |
| C1QTNF3  | 0.41   | 0.3105  | 2.0045 | 0.07385 | 0.18  | -4.76 | 0.48363 | none       |



|           |        |         |        |         |       |       |         |            |
|-----------|--------|---------|--------|---------|-------|-------|---------|------------|
| ZNF668    | 0.228  | 0.2448  | 2.0044 | 0.07387 | 0.18  | -4.76 | -0.4922 | none       |
| BPHL      | 0.268  | 0.193   | 2.0041 | 0.0739  | 0.18  | -4.76 | -1.2461 | none       |
| RPLP2     | -0.435 | -0.4532 | -2.004 | 0.07392 | 0.18  | -4.76 | 1.76891 | none       |
| ERICH5    | -0.233 | -0.1551 | -2.004 | 0.07395 | 0.181 | -4.76 | 0.94479 | none       |
| LINGO1    | -0.221 | -0.1583 | -2.004 | 0.07395 | 0.181 | -4.76 | 0.83893 | none       |
| SBNO1     | 0.482  | 0.5016  | 2.0035 | 0.07398 | 0.181 | -4.76 | -1.0095 | none       |
| NUP205    | 0.419  | 0.3275  | 2.0034 | 0.07399 | 0.181 | -4.76 | -1.1803 | none       |
| HBA2      | -0.264 | -0.1529 | -2.003 | 0.074   | 0.181 | -4.76 | 1.24251 | none       |
| WDR78     | 0.355  | 0.2256  | 2.0033 | 0.074   | 0.181 | -4.76 | -0.9644 | none       |
| NBPF20    | 0.383  | 0.4053  | 2.003  | 0.07403 | 0.181 | -4.76 | -0.7407 | none       |
| MLKL      | 0.515  | 0.4694  | 2.0029 | 0.07405 | 0.181 | -4.76 | -0.5785 | none       |
| C12ORF29  | -0.191 | -0.1833 | -2.003 | 0.07408 | 0.181 | -4.76 | 1.45314 | none       |
| SIAH1     | 0.292  | 0.255   | 2.0027 | 0.07408 | 0.181 | -4.76 | -0.3805 | none       |
| MRPL11    | -0.304 | -0.3105 | -2.002 | 0.07413 | 0.181 | -4.77 | 1.3649  | none       |
| PRKD1     | 0.215  | 0.1869  | 2.0021 | 0.07415 | 0.181 | -4.77 | -0.9261 | none       |
| AP2S1     | -0.299 | -0.2828 | -2.002 | 0.07416 | 0.181 | -4.77 | 1.38425 | none       |
| TYROBP    | -0.648 | -0.7062 | -2.002 | 0.07417 | 0.181 | -4.77 | 1.94398 | none       |
| SRRT      | 0.456  | 0.5112  | 2.0017 | 0.07419 | 0.181 | -4.77 | -0.0449 | none       |
| LRSAM1    | 0.345  | 0.343   | 2.0015 | 0.07422 | 0.181 | -4.77 | -0.7769 | none       |
| SCRN3     | 0.241  | 0.2171  | 2.0015 | 0.07422 | 0.181 | -4.77 | 0.34267 | none       |
| IL6ST     | 0.486  | 0.3995  | 2.0015 | 0.07423 | 0.181 | -4.77 | -1.3208 | none       |
| TSTD3     | 0.242  | 0.1315  | 2.0014 | 0.07423 | 0.181 | -4.77 | -1.0729 | none       |
| F8        | -0.179 | -0.1585 | -2.001 | 0.07428 | 0.181 | -4.77 | 0.50879 | none       |
| PAPOLA    | 0.202  | 0.1914  | 2.0009 | 0.07429 | 0.181 | -4.77 | 0.40007 | none       |
| DDX60     | 0.242  | 0.1183  | 2.0006 | 0.07433 | 0.181 | -4.77 | -0.7577 | none       |
| KXD1      | 0.242  | 0.1947  | 2.0006 | 0.07433 | 0.181 | -4.77 | -1.0091 | none       |
| MRGPRX3   | 0.141  | 0.1015  | 2.0006 | 0.07433 | 0.181 | -4.77 | -1.0309 | none       |
| COL19A1   | 0.334  | 0.3385  | 2.0003 | 0.07437 | 0.181 | -4.77 | 1.01062 | none       |
| TBC1D3B   | 0.619  | 0.5956  | 1.9999 | 0.07441 | 0.181 | -4.77 | -0.5888 | none       |
| KRTAP19-4 | 0.283  | 0.2834  | 1.9999 | 0.07441 | 0.181 | -4.77 | 0.87693 | none       |
| GNG3      | 0.349  | 0.2957  | 1.9995 | 0.07446 | 0.181 | -4.77 | -0.4963 | none       |
| MSH3      | 0.504  | 0.4799  | 1.9994 | 0.07448 | 0.181 | -4.77 | -0.0124 | none       |
| NAXD      | 0.205  | 0.1715  | 1.9992 | 0.0745  | 0.181 | -4.77 | -0.7338 | none       |
| LGI4      | -0.225 | -0.1757 | -1.999 | 0.07451 | 0.181 | -4.77 | 0.32059 | none       |
| HIST1H2AI | -0.739 | -0.6492 | -1.999 | 0.07453 | 0.181 | -4.77 | 1.15254 | none       |
| KNSTRN    | 0.233  | 0.2112  | 1.9989 | 0.07453 | 0.181 | -4.77 | -1.1735 | none       |
| LSM6      | -0.315 | -0.3502 | -1.999 | 0.07456 | 0.181 | -4.77 | 1.45931 | none       |
| GPX4      | -0.26  | -0.2232 | -1.999 | 0.07458 | 0.181 | -4.77 | 2.54987 | AA-related |
| LAMTOR3   | -0.406 | -0.4517 | -1.998 | 0.0746  | 0.181 | -4.77 | 1.75589 | none       |
| PTCH2     | 0.181  | 0.1425  | 1.998  | 0.07465 | 0.181 | -4.77 | 0.43836 | none       |

|         |        |         |        |         |       |       |         |      |
|---------|--------|---------|--------|---------|-------|-------|---------|------|
| MTRNR2L | -0.195 | -0.1704 | -1.998 | 0.07469 | 0.181 | -4.77 | 1.47144 | none |
| MRPL13  | -0.294 | -0.288  | -1.998 | 0.07471 | 0.181 | -4.77 | 1.14459 | none |
| ZCCHC10 | 0.353  | 0.2454  | 1.9975 | 0.07471 | 0.181 | -4.77 | -0.9333 | none |
| DHRS11  | 0.243  | 0.2319  | 1.9974 | 0.07472 | 0.181 | -4.77 | -0.2382 | none |
| PRDM9   | -0.229 | -0.256  | -1.997 | 0.07475 | 0.181 | -4.77 | 1.67459 | none |
| PSMB4   | -0.34  | -0.3256 | -1.997 | 0.07481 | 0.182 | -4.77 | 0.30128 | none |
| TCP1    | -0.195 | -0.173  | -1.996 | 0.07484 | 0.182 | -4.77 | 1.97392 | none |
| GMPR2   | 0.329  | 0.2395  | 1.9962 | 0.07487 | 0.182 | -4.77 | 0.72704 | none |
| SLC7A1  | 0.277  | 0.3472  | 1.9962 | 0.07488 | 0.182 | -4.77 | 0.07222 | none |
| CHMP2A  | -0.175 | -0.1684 | -1.996 | 0.07496 | 0.182 | -4.78 | 1.21313 | none |
| LIN7B   | 0.383  | 0.266   | 1.9951 | 0.075   | 0.182 | -4.78 | -0.6445 | none |
| PPFIA4  | 0.613  | 0.5592  | 1.9949 | 0.07504 | 0.182 | -4.78 | -1.0031 | none |
| FGF2    | 0.157  | 0.1088  | 1.9948 | 0.07504 | 0.182 | -4.78 | -1.3369 | none |
| ING1    | 0.418  | 0.2989  | 1.9945 | 0.07509 | 0.182 | -4.78 | -0.7274 | none |
| TCAP    | 0.339  | 0.2204  | 1.994  | 0.07514 | 0.182 | -4.78 | -0.2222 | none |
| ENOX2   | 0.579  | 0.4881  | 1.994  | 0.07514 | 0.182 | -4.78 | -0.38   | none |
| PSME4   | 0.472  | 0.4133  | 1.9937 | 0.07519 | 0.182 | -4.78 | -1.0667 | none |
| RER1    | -0.259 | -0.2355 | -1.993 | 0.07522 | 0.182 | -4.78 | 1.07863 | none |
| LRR1    | -0.301 | -0.3493 | -1.993 | 0.07522 | 0.182 | -4.78 | 0.92338 | none |
| ARID5B  | 0.518  | 0.5509  | 1.9931 | 0.07525 | 0.182 | -4.78 | -0.9443 | none |
| RASL11B | 0.233  | 0.2061  | 1.993  | 0.07527 | 0.182 | -4.78 | -0.8808 | none |
| WNT4    | 0.31   | 0.2808  | 1.9923 | 0.07535 | 0.182 | -4.78 | -0.9542 | none |
| IGFBP4  | -0.209 | -0.1742 | -1.992 | 0.07538 | 0.182 | -4.78 | 1.10288 | none |
| MORC2   | 0.412  | 0.468   | 1.9918 | 0.07542 | 0.183 | -4.78 | -0.4083 | none |
| CHML    | 0.462  | 0.4673  | 1.9914 | 0.07547 | 0.183 | -4.78 | -0.958  | none |
| TTC26   | 0.305  | 0.1809  | 1.9911 | 0.0755  | 0.183 | -4.78 | 0.18587 | none |
| MRPL35  | -0.282 | -0.3002 | -1.99  | 0.07559 | 0.183 | -4.78 | 1.05457 | none |
| TRIM37  | 0.452  | 0.4083  | 1.9899 | 0.07565 | 0.183 | -4.78 | 0.63988 | none |
| ADGRA2  | 0.199  | 0.1728  | 1.9894 | 0.07572 | 0.183 | -4.78 | -1.0013 | none |
| GADL1   | 0.276  | 0.2164  | 1.989  | 0.07577 | 0.183 | -4.79 | -1.1488 | none |
| YIPF6   | 0.283  | 0.1116  | 1.9887 | 0.07581 | 0.183 | -4.79 | -0.9347 | none |
| MRPL18  | -0.305 | -0.3024 | -1.988 | 0.07584 | 0.183 | -4.79 | 1.19736 | none |
| RGS1    | -0.318 | -0.34   | -1.988 | 0.07587 | 0.183 | -4.79 | 0.81108 | none |
| TNP1    | 0.246  | 0.251   | 1.9871 | 0.076   | 0.184 | -4.79 | 0.82459 | none |
| CYSRT1  | 0.311  | 0.1899  | 1.9863 | 0.07611 | 0.184 | -4.79 | 0.09401 | none |
| PIGK    | -0.324 | -0.3726 | -1.986 | 0.07611 | 0.184 | -4.79 | 1.70261 | none |
| NUP153  | 0.413  | 0.4491  | 1.9857 | 0.07618 | 0.184 | -4.79 | 0.56862 | none |
| ACSF3   | 0.263  | 0.227   | 1.9855 | 0.0762  | 0.184 | -4.79 | 0.13216 | none |
| APEX1   | -0.184 | -0.1533 | -1.985 | 0.07626 | 0.184 | -4.79 | 1.74106 | none |
| RPS5    | -0.421 | -0.4587 | -1.984 | 0.07638 | 0.184 | -4.79 | 1.9676  | none |

|          |        |         |        |         |       |       |         |      |
|----------|--------|---------|--------|---------|-------|-------|---------|------|
| TRMT2A   | 0.237  | 0.2362  | 1.9836 | 0.07644 | 0.184 | -4.79 | 0.0333  | none |
| HBB      | -0.328 | -0.2801 | -1.984 | 0.07645 | 0.184 | -4.79 | 0.71207 | none |
| CD24     | 0.162  | 0.1415  | 1.9835 | 0.07645 | 0.184 | -4.79 | -0.9932 | none |
| ABHD17B  | 0.261  | 0.1603  | 1.9835 | 0.07645 | 0.184 | -4.79 | 0.29545 | none |
| PIBF1    | 0.438  | 0.5183  | 1.9834 | 0.07647 | 0.185 | -4.79 | 0.50593 | none |
| UQCC3    | 0.306  | 0.2044  | 1.9833 | 0.07647 | 0.185 | -4.79 | -0.6849 | none |
| SULT1A1  | 0.237  | 0.2254  | 1.9825 | 0.07659 | 0.185 | -4.8  | -0.1232 | none |
| MNAT1    | -0.216 | -0.2276 | -1.982 | 0.07662 | 0.185 | -4.8  | 1.98596 | none |
| CPD      | 0.461  | 0.3917  | 1.9821 | 0.07663 | 0.185 | -4.8  | -0.6391 | none |
| CCT5     | -0.169 | -0.1288 | -1.982 | 0.07664 | 0.185 | -4.8  | 0.64314 | none |
| ATG9B    | 0.259  | 0.1965  | 1.9819 | 0.07666 | 0.185 | -4.8  | 0.31172 | none |
| ACTR3    | -0.16  | -0.1599 | -1.982 | 0.0767  | 0.185 | -4.8  | 1.63773 | none |
| OR5A2    | 0.138  | 0.1153  | 1.9815 | 0.07671 | 0.185 | -4.8  | -0.8185 | none |
| RUSC2    | -0.191 | -0.0754 | -1.981 | 0.07673 | 0.185 | -4.8  | 1.93818 | none |
| ZNF740   | 0.322  | 0.3371  | 1.9813 | 0.07674 | 0.185 | -4.8  | 0.49944 | none |
| NEFH     | 0.438  | 0.5248  | 1.981  | 0.07677 | 0.185 | -4.8  | 0.47838 | none |
| OTOG     | 0.343  | 0.2617  | 1.9809 | 0.07678 | 0.185 | -4.8  | -0.1763 | none |
| ITPR3    | 0.411  | 0.4905  | 1.9806 | 0.07683 | 0.185 | -4.8  | -0.4315 | none |
| SNX16    | -0.281 | -0.2273 | -1.981 | 0.07683 | 0.185 | -4.8  | 1.26224 | none |
| AC096949 | 0.468  | 0.3121  | 1.9802 | 0.07688 | 0.185 | -4.8  | 0.10073 | none |
| LDLRAD4  | 0.198  | 0.2028  | 1.9798 | 0.07693 | 0.185 | -4.8  | -0.2717 | none |
| MORF4L1  | 0.213  | 0.1319  | 1.9795 | 0.07696 | 0.185 | -4.8  | -1.1375 | none |
| ADAMTS1  | 0.198  | 0.1519  | 1.979  | 0.07703 | 0.185 | -4.8  | -0.3501 | none |
| GGNBP2   | 0.379  | 0.3936  | 1.9785 | 0.07708 | 0.185 | -4.8  | -0.0664 | none |
| PRDX3    | -0.31  | -0.305  | -1.978 | 0.07718 | 0.186 | -4.8  | 1.01874 | none |
| GRIPAP1  | 0.613  | 0.6041  | 1.9763 | 0.07737 | 0.186 | -4.8  | -0.981  | none |
| CST6     | -0.309 | -0.2894 | -1.976 | 0.07737 | 0.186 | -4.8  | 1.13039 | none |
| RPS2     | -0.356 | -0.3009 | -1.976 | 0.07739 | 0.186 | -4.8  | 0.91914 | none |
| RNF165   | 0.265  | 0.1905  | 1.9761 | 0.0774  | 0.186 | -4.8  | -0.6061 | none |
| EIF4G3   | 0.606  | 0.6618  | 1.9758 | 0.07743 | 0.186 | -4.81 | -0.6443 | none |
| TBC1D10B | 0.228  | 0.2278  | 1.9758 | 0.07743 | 0.186 | -4.81 | -0.3954 | none |
| GPX1     | -0.246 | -0.2182 | -1.975 | 0.07748 | 0.186 | -4.81 | 1.59328 | none |
| IQCE     | 0.304  | 0.3313  | 1.9754 | 0.07748 | 0.186 | -4.81 | 0.49459 | none |
| API5     | 0.3    | 0.2755  | 1.9754 | 0.07749 | 0.186 | -4.81 | -0.0641 | none |
| ILF2     | -0.169 | -0.1426 | -1.975 | 0.07752 | 0.186 | -4.81 | 1.25289 | none |
| LSS      | 0.241  | 0.251   | 1.9748 | 0.07755 | 0.186 | -4.81 | 0.44265 | none |
| KLF13    | 0.29   | 0.2603  | 1.9746 | 0.07758 | 0.186 | -4.81 | 0.39165 | none |
| RCBTB1   | 0.211  | 0.1184  | 1.9741 | 0.07764 | 0.186 | -4.81 | 0.1233  | none |
| CAPZA2   | 0.203  | 0.0393  | 1.974  | 0.07766 | 0.186 | -4.81 | -0.7364 | none |
| TMCO1    | -0.283 | -0.3236 | -1.974 | 0.07766 | 0.186 | -4.81 | 1.76691 | none |

|          |        |         |        |         |       |       |         |      |
|----------|--------|---------|--------|---------|-------|-------|---------|------|
| LSM3     | -0.259 | -0.2606 | -1.974 | 0.07768 | 0.186 | -4.81 | 0.64555 | none |
| ARFGEF1  | 0.489  | 0.5143  | 1.9731 | 0.07777 | 0.187 | -4.81 | -0.5066 | none |
| SLC25A3  | -0.267 | -0.2733 | -1.973 | 0.07783 | 0.187 | -4.81 | 1.77375 | none |
| AL513122 | -0.125 | -0.0813 | -1.973 | 0.07784 | 0.187 | -4.81 | 0.19337 | none |
| PPP3CC   | 0.275  | 0.1644  | 1.9724 | 0.07786 | 0.187 | -4.81 | 0.2351  | none |
| RTCA     | 0.172  | 0.0395  | 1.9724 | 0.07787 | 0.187 | -4.81 | -0.0385 | none |
| SZRD1    | 0.169  | 0.1819  | 1.9722 | 0.07789 | 0.187 | -4.81 | -0.3846 | none |
| ODF3B    | 0.274  | 0.1296  | 1.9721 | 0.07791 | 0.187 | -4.81 | 0.58951 | none |
| DGUOK    | -0.251 | -0.2753 | -1.972 | 0.07791 | 0.187 | -4.81 | 1.99656 | none |
| GPR6     | 0.189  | 0.0926  | 1.9717 | 0.07795 | 0.187 | -4.81 | -0.708  | none |
| RAB17    | 0.231  | 0.2268  | 1.9716 | 0.07797 | 0.187 | -4.81 | 0.26526 | none |
| SEZ6     | 0.395  | 0.3397  | 1.9716 | 0.07797 | 0.187 | -4.81 | -0.8152 | none |
| APH1A    | -0.342 | -0.3602 | -1.971 | 0.07799 | 0.187 | -4.81 | 1.95879 | none |
| PRRG3    | 0.265  | 0.2206  | 1.9714 | 0.07799 | 0.187 | -4.81 | -0.722  | none |
| MANBA    | 0.198  | 0.1257  | 1.9704 | 0.07812 | 0.187 | -4.81 | 0.52519 | none |
| ZNF577   | 0.214  | 0.1269  | 1.9702 | 0.07814 | 0.187 | -4.81 | -0.5004 | none |
| BEND7    | 0.462  | 0.3487  | 1.9695 | 0.07823 | 0.187 | -4.81 | -0.0625 | none |
| TRMT112  | -0.307 | -0.3065 | -1.969 | 0.07828 | 0.187 | -4.82 | 1.64625 | none |
| PHGR1    | -0.278 | -0.2188 | -1.969 | 0.07828 | 0.187 | -4.82 | 0.5042  | none |
| PTBP2    | 0.287  | 0.2154  | 1.9682 | 0.0784  | 0.188 | -4.82 | 0.19605 | none |
| POLR1D   | -0.318 | -0.3295 | -1.968 | 0.07846 | 0.188 | -4.82 | 1.91451 | none |
| RAB1B    | -0.254 | -0.1899 | -1.966 | 0.07867 | 0.188 | -4.82 | 1.42115 | none |
| GNL3     | 0.363  | 0.367   | 1.9659 | 0.07869 | 0.188 | -4.82 | 0.1748  | none |
| HIST1H3B | -0.514 | -0.491  | -1.966 | 0.07872 | 0.188 | -4.82 | 0.8431  | none |
| RIMS1    | 0.205  | 0.1433  | 1.9657 | 0.07873 | 0.188 | -4.82 | -0.8782 | none |
| MYEOV    | 0.486  | 0.332   | 1.9656 | 0.07874 | 0.188 | -4.82 | -0.496  | none |
| AEBP1    | 0.389  | 0.4456  | 1.9656 | 0.07874 | 0.188 | -4.82 | 0.26253 | none |
| ZNF530   | 0.401  | 0.3345  | 1.9651 | 0.0788  | 0.188 | -4.82 | 0.19717 | none |
| TADA2B   | 0.326  | 0.2714  | 1.9644 | 0.0789  | 0.189 | -4.82 | -0.9972 | none |
| TMEM184  | 0.199  | 0.1307  | 1.9637 | 0.07898 | 0.189 | -4.82 | -0.7013 | none |
| SDC3     | 0.195  | 0.1287  | 1.9633 | 0.07904 | 0.189 | -4.82 | -1.2285 | none |
| SARS2    | 0.175  | 0.1289  | 1.9623 | 0.07917 | 0.189 | -4.83 | 0.90264 | none |
| LMTK2    | 0.479  | 0.5208  | 1.9623 | 0.07917 | 0.189 | -4.83 | -0.6294 | none |
| ZNF285   | 0.269  | 0.2169  | 1.9608 | 0.07936 | 0.19  | -4.83 | -0.1695 | none |
| OBSL1    | 0.208  | 0.1387  | 1.96   | 0.07947 | 0.19  | -4.83 | -0.9645 | none |
| ZNF613   | 0.672  | 0.5582  | 1.9599 | 0.07948 | 0.19  | -4.83 | -1.1936 | none |
| GBGT1    | 0.378  | 0.2161  | 1.9599 | 0.07949 | 0.19  | -4.83 | -1.1196 | none |
| SSX2     | 0.169  | 0.1624  | 1.9596 | 0.07951 | 0.19  | -4.83 | -0.6965 | none |
| SEMA7A   | 0.386  | 0.3348  | 1.958  | 0.07973 | 0.19  | -4.83 | -0.2271 | none |
| LIMK2    | 0.243  | 0.2884  | 1.9578 | 0.07975 | 0.19  | -4.83 | 0.08188 | none |

|            |        |         |        |         |       |       |         |      |
|------------|--------|---------|--------|---------|-------|-------|---------|------|
| SCAF1      | 0.662  | 0.7183  | 1.9578 | 0.07976 | 0.19  | -4.83 | -0.6739 | none |
| GRM5       | 0.218  | 0.1569  | 1.9572 | 0.07983 | 0.191 | -4.83 | 0.0141  | none |
| H3F3B      | -0.246 | -0.1932 | -1.957 | 0.07986 | 0.191 | -4.83 | 0.22374 | none |
| RPS29      | -0.553 | -0.6013 | -1.957 | 0.07988 | 0.191 | -4.83 | 1.19948 | none |
| ITIH2      | -0.256 | -0.2337 | -1.957 | 0.07989 | 0.191 | -4.83 | 0.01395 | none |
| FLYWCH2    | 0.218  | 0.2001  | 1.9567 | 0.0799  | 0.191 | -4.83 | 0.16526 | none |
| DLX3       | 0.208  | 0.1595  | 1.9567 | 0.0799  | 0.191 | -4.83 | 1.54237 | none |
| GOLGA8Q    | 0.23   | 0.1747  | 1.9564 | 0.07993 | 0.191 | -4.83 | 0.41493 | none |
| IQCJ-SCHIF | 0.378  | 0.4043  | 1.9562 | 0.07996 | 0.191 | -4.83 | -0.2815 | none |
| ZNF599     | 0.281  | 0.1403  | 1.9559 | 0.08    | 0.191 | -4.84 | -0.7717 | none |
| TBL1XR1    | 0.255  | 0.1569  | 1.9553 | 0.08008 | 0.191 | -4.84 | -0.945  | none |
| SORCS1     | -0.231 | -0.1805 | -1.955 | 0.08009 | 0.191 | -4.84 | -0.1214 | none |
| SETBP1     | 0.237  | 0.2321  | 1.9548 | 0.08015 | 0.191 | -4.84 | -0.061  | none |
| PRR29      | 0.22   | 0.2286  | 1.9544 | 0.0802  | 0.191 | -4.84 | -1.0851 | none |
| PRCD       | 0.241  | 0.2751  | 1.9542 | 0.08023 | 0.191 | -4.84 | 0.71319 | none |
| C1ORF141   | 0.434  | 0.3413  | 1.9542 | 0.08023 | 0.191 | -4.84 | 0.09852 | none |
| ZG16       | 0.219  | 0.1749  | 1.9537 | 0.0803  | 0.191 | -4.84 | -0.7023 | none |
| MEA1       | -0.21  | -0.2033 | -1.954 | 0.0803  | 0.191 | -4.84 | 1.58213 | none |
| C3ORF52    | 0.18   | 0.1262  | 1.9535 | 0.08032 | 0.191 | -4.84 | 0.56696 | none |
| RPS21      | -0.423 | -0.4554 | -1.953 | 0.08034 | 0.191 | -4.84 | 1.72949 | none |
| AGFG2      | 0.288  | 0.2372  | 1.9533 | 0.08035 | 0.191 | -4.84 | -0.2591 | none |
| FLT4       | -0.248 | -0.1234 | -1.953 | 0.08036 | 0.191 | -4.84 | 1.17546 | none |
| IGF1       | 0.326  | 0.2872  | 1.9522 | 0.08049 | 0.192 | -4.84 | -0.4551 | none |
| ACTC1      | -0.266 | -0.1757 | -1.952 | 0.08049 | 0.192 | -4.84 | 1.54978 | none |
| SFTPC      | -0.283 | -0.1715 | -1.952 | 0.0805  | 0.192 | -4.84 | 0.05698 | none |
| DYNAP      | -0.155 | -0.0946 | -1.952 | 0.08052 | 0.192 | -4.84 | -0.2389 | none |
| PVR        | 0.368  | 0.3916  | 1.9519 | 0.08053 | 0.192 | -4.84 | -0.0593 | none |
| CYP2R1     | -0.507 | -0.3856 | -1.952 | 0.08058 | 0.192 | -4.84 | 2.03199 | none |
| SFT2D1     | -0.337 | -0.3884 | -1.951 | 0.08065 | 0.192 | -4.84 | 1.12033 | none |
| FABP6      | -0.351 | -0.3037 | -1.951 | 0.08066 | 0.192 | -4.84 | 1.34779 | none |
| IFNL2      | -0.168 | -0.1529 | -1.951 | 0.08069 | 0.192 | -4.84 | 1.84221 | none |
| TMEM170    | 0.145  | 0.0993  | 1.9502 | 0.08075 | 0.192 | -4.84 | -0.8839 | none |
| TSR2       | 0.214  | 0.2023  | 1.9501 | 0.08077 | 0.192 | -4.84 | -1.2386 | none |
| DYNLT1     | -0.306 | -0.3713 | -1.95  | 0.08079 | 0.192 | -4.84 | 1.45182 | none |
| ZMIZ1      | 0.505  | 0.5885  | 1.9499 | 0.0808  | 0.192 | -4.84 | -0.6361 | none |
| RPS16      | -0.402 | -0.4249 | -1.95  | 0.0808  | 0.192 | -4.84 | 1.4165  | none |
| HIGD1B     | 0.505  | 0.3593  | 1.9496 | 0.08083 | 0.192 | -4.84 | -0.9985 | none |
| DCAKD      | 0.204  | 0.1415  | 1.9495 | 0.08085 | 0.192 | -4.84 | -0.5408 | none |
| CDNF       | 0.226  | 0.1517  | 1.9493 | 0.08088 | 0.192 | -4.85 | -0.0733 | none |
| NUDT4      | 0.208  | 0.1457  | 1.9491 | 0.0809  | 0.192 | -4.85 | -0.3839 | none |

|           |        |         |        |         |       |       |         |      |
|-----------|--------|---------|--------|---------|-------|-------|---------|------|
| MIF       | -0.352 | -0.317  | -1.949 | 0.08094 | 0.192 | -4.85 | 1.463   | none |
| ARCN1     | 0.231  | 0.1725  | 1.9485 | 0.08098 | 0.192 | -4.85 | 0.07625 | none |
| GPN3      | 0.251  | 0.1194  | 1.9477 | 0.08108 | 0.192 | -4.85 | -0.2997 | none |
| KLHDC3    | -0.319 | -0.3386 | -1.947 | 0.08114 | 0.193 | -4.85 | 1.30857 | none |
| PPP1R12A  | 0.731  | 0.773   | 1.9471 | 0.08117 | 0.193 | -4.85 | -0.2361 | none |
| CD300LF   | 0.196  | 0.1462  | 1.947  | 0.08118 | 0.193 | -4.85 | -0.3268 | none |
| SFT2D3    | 0.388  | 0.2588  | 1.9461 | 0.08129 | 0.193 | -4.85 | -0.9201 | none |
| JPH4      | 0.21   | 0.1502  | 1.9459 | 0.08133 | 0.193 | -4.85 | -0.0113 | none |
| ZMYM2     | 0.466  | 0.459   | 1.9456 | 0.08137 | 0.193 | -4.85 | -0.0408 | none |
| 11-Sep    | -0.245 | -0.1015 | -1.946 | 0.08137 | 0.193 | -4.85 | 1.24096 | none |
| M6PR      | -0.229 | -0.2357 | -1.945 | 0.08139 | 0.193 | -4.85 | 1.68184 | none |
| DNTTIP1   | 0.141  | 0.1426  | 1.9447 | 0.08149 | 0.193 | -4.85 | 0.66929 | none |
| UBE2R2    | -0.155 | -0.1278 | -1.944 | 0.08156 | 0.193 | -4.85 | 1.07594 | none |
| HDAC5     | 0.356  | 0.2726  | 1.9437 | 0.08162 | 0.193 | -4.85 | -0.9923 | none |
| RIN1      | 0.529  | 0.4861  | 1.9435 | 0.08165 | 0.193 | -4.85 | -0.6532 | none |
| PSMD5     | 0.151  | 0.1384  | 1.9434 | 0.08166 | 0.193 | -4.85 | -0.054  | none |
| KRT14     | 0.19   | 0.1996  | 1.9434 | 0.08167 | 0.193 | -4.85 | 1.15997 | none |
| KIF4A     | 0.66   | 0.6968  | 1.9429 | 0.08172 | 0.193 | -4.85 | -0.2691 | none |
| TEAD2     | -0.174 | -0.1588 | -1.943 | 0.08174 | 0.193 | -4.86 | 0.30584 | none |
| GLIPR1    | -0.406 | -0.4837 | -1.943 | 0.08175 | 0.193 | -4.86 | 1.82812 | none |
| CSRP2     | 0.266  | 0.1952  | 1.9427 | 0.08175 | 0.193 | -4.86 | -1.1578 | none |
| CABP5     | 0.24   | 0.24    | 1.9426 | 0.08176 | 0.193 | -4.86 | 0.56439 | none |
| CCNT1     | 0.414  | 0.3428  | 1.9426 | 0.08177 | 0.193 | -4.86 | -0.1958 | none |
| FAM162A   | -0.264 | -0.2763 | -1.942 | 0.08179 | 0.193 | -4.86 | 1.39837 | none |
| PTGDR2    | 0.141  | 0.0919  | 1.9424 | 0.08179 | 0.193 | -4.86 | -1.1921 | none |
| PLEKHG4   | 0.215  | 0.2421  | 1.9418 | 0.08188 | 0.194 | -4.86 | 0.76827 | none |
| HR        | -0.25  | -0.147  | -1.942 | 0.08191 | 0.194 | -4.86 | -0.2544 | none |
| KIF11     | 0.608  | 0.628   | 1.9413 | 0.08194 | 0.194 | -4.86 | -0.5215 | none |
| KIAA1211l | 0.262  | 0.2747  | 1.9402 | 0.08209 | 0.194 | -4.86 | 0.6937  | none |
| LAIR2     | 0.711  | 0.4966  | 1.94   | 0.08211 | 0.194 | -4.86 | 0.07514 | none |
| ZC3H7A    | 0.348  | 0.3368  | 1.9397 | 0.08216 | 0.194 | -4.86 | -0.8127 | none |
| HELQ      | -0.332 | -0.2639 | -1.939 | 0.08223 | 0.194 | -4.86 | 0.19945 | none |
| IRF8      | 0.268  | 0.2339  | 1.9389 | 0.08226 | 0.194 | -4.86 | -0.5398 | none |
| C11ORF68  | 0.307  | 0.1392  | 1.9387 | 0.0823  | 0.194 | -4.86 | -1.1727 | none |
| NOXA1     | -0.145 | -0.1095 | -1.938 | 0.08233 | 0.194 | -4.86 | 0.31713 | none |
| SLC12A6   | 0.476  | 0.473   | 1.9381 | 0.08238 | 0.195 | -4.86 | -0.9473 | none |
| NAT1      | 0.266  | 0.0486  | 1.9379 | 0.0824  | 0.195 | -4.86 | 0.01905 | none |
| NT5DC1    | 0.275  | 0.1294  | 1.9379 | 0.08241 | 0.195 | -4.86 | 0.30921 | none |
| PDS5B     | 0.582  | 0.5925  | 1.9377 | 0.08243 | 0.195 | -4.86 | -0.207  | none |
| ZNF182    | 0.298  | 0.3186  | 1.9376 | 0.08244 | 0.195 | -4.86 | -0.8197 | none |

|          |        |         |        |         |       |       |         |            |
|----------|--------|---------|--------|---------|-------|-------|---------|------------|
| SCGB1D2  | 0.266  | 0.2657  | 1.9375 | 0.08245 | 0.195 | -4.86 | 1.00034 | none       |
| SKA1     | 0.49   | 0.4303  | 1.9375 | 0.08246 | 0.195 | -4.86 | -0.1928 | none       |
| NECAP1   | 0.285  | 0.1575  | 1.9375 | 0.08246 | 0.195 | -4.86 | -0.2713 | none       |
| NDUFC1   | -0.329 | -0.34   | -1.937 | 0.08247 | 0.195 | -4.86 | 1.52596 | none       |
| INO80B-W | -0.25  | -0.3339 | -1.937 | 0.08249 | 0.195 | -4.86 | 0.75644 | none       |
| BTN3A2   | 0.391  | 0.3432  | 1.9371 | 0.08251 | 0.195 | -4.86 | -0.6206 | none       |
| MTG1     | 0.193  | 0.157   | 1.9371 | 0.08251 | 0.195 | -4.86 | -0.3059 | none       |
| MCC      | 0.322  | 0.2817  | 1.937  | 0.08252 | 0.195 | -4.86 | -0.6483 | none       |
| ZNF831   | 0.173  | 0.1788  | 1.9369 | 0.08254 | 0.195 | -4.86 | -0.3137 | none       |
| OR7C2    | 0.17   | 0.145   | 1.9368 | 0.08255 | 0.195 | -4.86 | -0.3257 | none       |
| SLC22A11 | 0.336  | 0.2442  | 1.9366 | 0.08258 | 0.195 | -4.86 | -0.1166 | none       |
| GALNT1   | 0.194  | 0.1702  | 1.9364 | 0.0826  | 0.195 | -4.86 | 0.09305 | none       |
| RHOT1    | 0.382  | 0.3133  | 1.9362 | 0.08263 | 0.195 | -4.86 | -0.5811 | none       |
| ASNSD1   | -0.196 | -0.1967 | -1.936 | 0.08264 | 0.195 | -4.86 | 1.52749 | none       |
| EVI5L    | 0.278  | 0.2283  | 1.9355 | 0.08273 | 0.195 | -4.87 | -0.9597 | none       |
| ITPR2    | 0.575  | 0.6501  | 1.9352 | 0.08277 | 0.195 | -4.87 | -0.2632 | none       |
| GABBR1   | -0.206 | -0.1389 | -1.935 | 0.08279 | 0.195 | -4.87 | 0.24789 | none       |
| SPATA45  | -0.247 | -0.2996 | -1.935 | 0.08282 | 0.195 | -4.87 | -0.4168 | none       |
| ABCA2    | 0.432  | 0.4242  | 1.9346 | 0.08284 | 0.195 | -4.87 | -0.4243 | none       |
| OOEP     | 0.316  | 0.1984  | 1.9343 | 0.08289 | 0.195 | -4.87 | -0.1275 | none       |
| FKBP5    | 0.326  | 0.3259  | 1.9341 | 0.08291 | 0.195 | -4.87 | 0.18893 | none       |
| ZBP1     | 0.316  | 0.2168  | 1.9335 | 0.08299 | 0.195 | -4.87 | -0.5049 | none       |
| PLEKHF1  | 0.182  | 0.1504  | 1.9333 | 0.08303 | 0.195 | -4.87 | 0.56425 | none       |
| NOP2     | 0.418  | 0.4853  | 1.9332 | 0.08304 | 0.195 | -4.87 | 0.12913 | none       |
| YWHAE    | -0.189 | -0.1542 | -1.933 | 0.08304 | 0.195 | -4.87 | 0.26249 | none       |
| RPA3     | -0.455 | -0.5149 | -1.932 | 0.08314 | 0.196 | -4.87 | 1.32091 | none       |
| AGO2     | 0.302  | 0.3543  | 1.9321 | 0.08319 | 0.196 | -4.87 | 0.27768 | none       |
| EPM2A    | 0.154  | 0.1127  | 1.932  | 0.0832  | 0.196 | -4.87 | -0.9014 | none       |
| GALNT6   | 0.493  | 0.5167  | 1.9314 | 0.08328 | 0.196 | -4.87 | -0.6576 | none       |
| ANO9     | 0.235  | 0.2681  | 1.9306 | 0.08339 | 0.196 | -4.87 | 0.22865 | none       |
| C2ORF68  | 0.318  | 0.2107  | 1.9304 | 0.08342 | 0.196 | -4.87 | -0.9574 | none       |
| NAPG     | -0.194 | -0.1822 | -1.93  | 0.08343 | 0.196 | -4.87 | 1.09504 | none       |
| SNAPIN   | -0.214 | -0.2381 | -1.93  | 0.08349 | 0.196 | -4.87 | 2.31416 | AA-related |
| ZNF500   | 0.323  | 0.3216  | 1.9298 | 0.0835  | 0.196 | -4.87 | -0.4919 | none       |
| RIBC1    | -0.335 | -0.1945 | -1.93  | 0.08351 | 0.196 | -4.87 | 1.19374 | none       |
| STRC     | 0.231  | 0.2161  | 1.9292 | 0.08359 | 0.196 | -4.88 | -0.3373 | none       |
| CEP128   | 0.357  | 0.3359  | 1.9289 | 0.08363 | 0.196 | -4.88 | -0.275  | none       |
| SLITRK2  | 0.152  | 0.1029  | 1.9287 | 0.08365 | 0.196 | -4.88 | -1.2355 | none       |
| CLK1     | 0.209  | 0.2015  | 1.9287 | 0.08365 | 0.196 | -4.88 | 0.39109 | none       |
| WDR47    | 0.178  | 0.1929  | 1.9285 | 0.08369 | 0.196 | -4.88 | -0.4545 | none       |

|          |        |         |        |         |       |       |         |            |
|----------|--------|---------|--------|---------|-------|-------|---------|------------|
| ASTL     | -0.201 | -0.1572 | -1.928 | 0.08372 | 0.197 | -4.88 | 1.9907  | none       |
| RNASEH2C | -0.406 | -0.3676 | -1.928 | 0.08377 | 0.197 | -4.88 | 2.04649 | none       |
| SUPT5H   | 0.449  | 0.4706  | 1.9266 | 0.08394 | 0.197 | -4.88 | -0.5162 | none       |
| FCRL1    | 0.322  | 0.2483  | 1.9264 | 0.08396 | 0.197 | -4.88 | -0.2313 | none       |
| THEM5    | -0.483 | -0.2635 | -1.926 | 0.08397 | 0.197 | -4.88 | 1.59352 | none       |
| LRP2     | 0.198  | 0.1924  | 1.9263 | 0.08399 | 0.197 | -4.88 | 0.48378 | none       |
| PCP2     | -0.304 | -0.2324 | -1.926 | 0.08401 | 0.197 | -4.88 | 1.07521 | none       |
| CSGALNAC | 0.199  | 0.1739  | 1.926  | 0.08402 | 0.197 | -4.88 | -0.3792 | none       |
| SLC16A2  | 0.156  | 0.1154  | 1.926  | 0.08402 | 0.197 | -4.88 | -1.353  | none       |
| RRP1     | 0.286  | 0.3306  | 1.9256 | 0.08408 | 0.197 | -4.88 | 0.12343 | none       |
| ITM2A    | -0.293 | -0.3757 | -1.926 | 0.08408 | 0.197 | -4.88 | 1.25182 | none       |
| PTPRB    | 0.326  | 0.2299  | 1.9255 | 0.08409 | 0.197 | -4.88 | -1.3892 | none       |
| SNRPN    | -0.232 | -0.2628 | -1.925 | 0.08414 | 0.197 | -4.88 | 2.23552 | AA-related |
| PPP4R2   | 0.312  | 0.2812  | 1.925  | 0.08416 | 0.197 | -4.88 | -1.1492 | none       |
| TAF13    | 0.373  | 0.4118  | 1.9247 | 0.08421 | 0.197 | -4.88 | -0.5157 | none       |
| IKBIP    | 0.329  | 0.2826  | 1.9246 | 0.08421 | 0.197 | -4.88 | -0.7103 | none       |
| RPL10    | -0.335 | -0.3565 | -1.925 | 0.08422 | 0.197 | -4.88 | 2.08177 | none       |
| CENPVL1  | 0.136  | 0.1055  | 1.9245 | 0.08424 | 0.197 | -4.88 | -0.3228 | none       |
| CENPVL2  | 0.136  | 0.1055  | 1.9245 | 0.08424 | 0.197 | -4.88 | -0.3228 | none       |
| TDP2     | -0.29  | -0.2829 | -1.924 | 0.08425 | 0.197 | -4.88 | 1.70706 | none       |
| RGS6     | -0.271 | -0.2176 | -1.924 | 0.08428 | 0.197 | -4.88 | 1.8267  | none       |
| GGCT     | -0.134 | -0.1005 | -1.924 | 0.0843  | 0.197 | -4.88 | 0.76315 | none       |
| CLCNKA   | 0.189  | 0.189   | 1.924  | 0.0843  | 0.197 | -4.88 | 0.55525 | none       |
| SMPD1    | -0.262 | -0.2445 | -1.924 | 0.08432 | 0.197 | -4.88 | -0.0737 | none       |
| TGFBR1   | 0.174  | 0.0935  | 1.9232 | 0.08441 | 0.197 | -4.88 | 1.00557 | none       |
| CAPRIN1  | 0.354  | 0.358   | 1.9227 | 0.08448 | 0.198 | -4.89 | 0.64313 | none       |
| SMG6     | 0.29   | 0.2725  | 1.9225 | 0.0845  | 0.198 | -4.89 | 0.03867 | none       |
| SNRNP40  | -0.164 | -0.148  | -1.922 | 0.08451 | 0.198 | -4.89 | 0.05821 | none       |
| CEP290   | -0.317 | -0.2711 | -1.922 | 0.08452 | 0.198 | -4.89 | 1.70678 | none       |
| WIPF1    | 0.328  | 0.3036  | 1.9223 | 0.08453 | 0.198 | -4.89 | -0.6303 | none       |
| RAB30    | 0.402  | 0.2513  | 1.9218 | 0.0846  | 0.198 | -4.89 | -0.6053 | none       |
| KCTD7    | 0.28   | 0.2283  | 1.9216 | 0.08463 | 0.198 | -4.89 | 0.61865 | none       |
| CALCOCO1 | 0.476  | 0.4306  | 1.9214 | 0.08465 | 0.198 | -4.89 | -1.3942 | none       |
| CD38     | -0.264 | -0.288  | -1.921 | 0.08467 | 0.198 | -4.89 | 2.00681 | none       |
| NELFE    | -0.155 | -0.123  | -1.921 | 0.08467 | 0.198 | -4.89 | 1.94655 | none       |
| JAG2     | 0.339  | 0.3093  | 1.9202 | 0.08482 | 0.198 | -4.89 | 0.77115 | none       |
| ATXN7L3B | 0.177  | 0.124   | 1.92   | 0.08485 | 0.198 | -4.89 | 0.49501 | none       |
| PRTFDC1  | -0.247 | -0.2124 | -1.92  | 0.08487 | 0.198 | -4.89 | 0.07047 | none       |
| EIF1AX   | -0.153 | -0.1193 | -1.919 | 0.08494 | 0.198 | -4.89 | 1.13298 | none       |
| PRTG     | -0.225 | -0.175  | -1.919 | 0.08494 | 0.198 | -4.89 | 0.60489 | none       |



|         |        |         |        |         |       |       |         |            |
|---------|--------|---------|--------|---------|-------|-------|---------|------------|
| SULT1E1 | 0.191  | 0.1809  | 1.9193 | 0.08495 | 0.198 | -4.89 | 1.12657 | none       |
| ALDH3A1 | 0.405  | 0.4143  | 1.9192 | 0.08497 | 0.198 | -4.89 | -0.2545 | none       |
| SPATA8  | 0.344  | 0.2291  | 1.9185 | 0.08506 | 0.198 | -4.89 | -0.9201 | none       |
| SUFU    | 0.274  | 0.2982  | 1.9184 | 0.08507 | 0.198 | -4.89 | -1.1325 | none       |
| C5ORF24 | 0.313  | 0.3439  | 1.9184 | 0.08507 | 0.198 | -4.89 | 0.89652 | none       |
| CEP55   | 0.497  | 0.4654  | 1.9184 | 0.08508 | 0.198 | -4.89 | -1.0519 | none       |
| DDX59   | 0.314  | 0.2887  | 1.9183 | 0.08509 | 0.198 | -4.89 | 1.03413 | none       |
| ADGRD1  | 0.207  | 0.2124  | 1.9182 | 0.0851  | 0.198 | -4.89 | -0.4331 | none       |
| SLMAP   | 0.559  | 0.5647  | 1.9182 | 0.0851  | 0.198 | -4.89 | 0.3609  | none       |
| MAPKBP1 | 0.315  | 0.318   | 1.9177 | 0.08517 | 0.199 | -4.89 | -0.6698 | none       |
| TJP3    | 0.367  | 0.2475  | 1.9176 | 0.08518 | 0.199 | -4.89 | -0.0951 | none       |
| NDST4   | 0.213  | 0.1418  | 1.9173 | 0.08523 | 0.199 | -4.89 | -0.2241 | none       |
| LRRC75A | -0.326 | -0.3677 | -1.917 | 0.08524 | 0.199 | -4.89 | 1.23406 | none       |
| AFF4    | 0.664  | 0.6627  | 1.9171 | 0.08525 | 0.199 | -4.89 | -0.8473 | none       |
| SLC35B1 | -0.321 | -0.3272 | -1.917 | 0.08526 | 0.199 | -4.89 | 1.51691 | none       |
| FBXO2   | 0.394  | 0.3555  | 1.9168 | 0.0853  | 0.199 | -4.89 | -0.3605 | none       |
| RPS15A  | -0.428 | -0.4993 | -1.917 | 0.08534 | 0.199 | -4.89 | 2.01025 | none       |
| SMIM11A | 0.287  | 0.1237  | 1.9163 | 0.08537 | 0.199 | -4.89 | 0.55511 | none       |
| RNF24   | 0.263  | 0.2081  | 1.9159 | 0.08542 | 0.199 | -4.9  | -0.4162 | none       |
| MYO7B   | -0.231 | -0.1937 | -1.916 | 0.08543 | 0.199 | -4.9  | 2.337   | AA-related |
| UBR2    | 0.366  | 0.3458  | 1.9159 | 0.08543 | 0.199 | -4.9  | -0.7066 | none       |
| GLA     | -0.29  | -0.3305 | -1.916 | 0.08547 | 0.199 | -4.9  | 1.31708 | none       |
| ACVR1C  | 0.139  | 0.1261  | 1.9154 | 0.0855  | 0.199 | -4.9  | -0.2929 | none       |
| PIM3    | -0.25  | -0.1857 | -1.915 | 0.08553 | 0.199 | -4.9  | 0.55224 | none       |
| SPIN2B  | 0.398  | 0.2801  | 1.9148 | 0.08558 | 0.199 | -4.9  | -0.6053 | none       |
| NUP62   | 0.44   | 0.4917  | 1.9146 | 0.0856  | 0.199 | -4.9  | -0.6558 | none       |
| TDRD1   | 0.205  | 0.1883  | 1.9145 | 0.08563 | 0.199 | -4.9  | -0.7146 | none       |
| HIC2    | 0.198  | 0.2137  | 1.9143 | 0.08565 | 0.199 | -4.9  | -0.2961 | none       |
| MOSPD1  | 0.306  | 0.1299  | 1.9142 | 0.08566 | 0.199 | -4.9  | 0.31218 | none       |
| VWA8    | 0.494  | 0.4192  | 1.9139 | 0.0857  | 0.199 | -4.9  | 1.18655 | none       |
| SYCE1L  | -0.351 | -0.2475 | -1.914 | 0.08572 | 0.199 | -4.9  | 0.76568 | none       |
| ARHGAP3 | 0.481  | 0.4774  | 1.9124 | 0.08591 | 0.2   | -4.9  | -0.8334 | none       |
| DCAF6   | 0.338  | 0.2804  | 1.9118 | 0.086   | 0.2   | -4.9  | -0.0254 | none       |
| STX3    | 0.37   | 0.2899  | 1.9117 | 0.08601 | 0.2   | -4.9  | -0.7094 | none       |
| ZBTB40  | 0.409  | 0.4365  | 1.9117 | 0.08601 | 0.2   | -4.9  | -0.1767 | none       |
| KIF21B  | 0.49   | 0.5937  | 1.9117 | 0.08602 | 0.2   | -4.9  | -0.3611 | none       |
| PXYLP1  | 0.406  | 0.2101  | 1.9115 | 0.08605 | 0.2   | -4.9  | -0.5884 | none       |
| HSPB9   | 0.203  | 0.1744  | 1.9109 | 0.08613 | 0.2   | -4.9  | -1.0318 | none       |
| PCDHB2  | 0.352  | 0.2597  | 1.9108 | 0.08615 | 0.2   | -4.9  | -1.2798 | none       |
| RAB40C  | 0.263  | 0.2498  | 1.9107 | 0.08616 | 0.2   | -4.9  | 0.27851 | none       |

|          |        |         |        |         |       |       |         |            |
|----------|--------|---------|--------|---------|-------|-------|---------|------------|
| KIAA1549 | 0.178  | 0.1574  | 1.9106 | 0.08617 | 0.2   | -4.9  | -1.0247 | none       |
| ZNF10    | 0.313  | 0.2455  | 1.9106 | 0.08617 | 0.2   | -4.9  | 0.72671 | none       |
| ZFY      | 0.266  | 0.2279  | 1.9106 | 0.08617 | 0.2   | -4.9  | -1.2669 | none       |
| KIAA1210 | 0.169  | 0.12    | 1.9103 | 0.08621 | 0.2   | -4.9  | -1.3647 | none       |
| TEP1     | 0.465  | 0.5591  | 1.9103 | 0.08621 | 0.2   | -4.9  | -0.1493 | none       |
| SSX1     | -0.19  | -0.1816 | -1.91  | 0.08623 | 0.2   | -4.9  | 0.89986 | none       |
| TMTC2    | 0.177  | 0.1428  | 1.9102 | 0.08623 | 0.2   | -4.9  | -0.3813 | none       |
| APOH     | 0.761  | 0.4526  | 1.91   | 0.08626 | 0.2   | -4.9  | -0.9593 | none       |
| ACTR1A   | -0.168 | -0.1132 | -1.91  | 0.08626 | 0.2   | -4.9  | 1.01629 | none       |
| SORCS3   | -0.224 | -0.2243 | -1.91  | 0.08626 | 0.2   | -4.9  | 1.51352 | none       |
| IDH1     | -0.216 | -0.2658 | -1.91  | 0.08627 | 0.2   | -4.9  | 0.50195 | none       |
| PWP2     | 0.494  | 0.4583  | 1.9081 | 0.08651 | 0.2   | -4.91 | -0.0598 | none       |
| LONP2    | 0.302  | 0.3485  | 1.9081 | 0.08653 | 0.2   | -4.91 | -0.4481 | none       |
| AHCY     | -0.206 | -0.1783 | -1.908 | 0.08653 | 0.2   | -4.91 | 2.48093 | AA-related |
| MRPL58   | -0.201 | -0.2    | -1.908 | 0.08655 | 0.2   | -4.91 | 1.99611 | none       |
| CNPPD1   | 0.168  | 0.1553  | 1.9079 | 0.08655 | 0.2   | -4.91 | 0.22532 | none       |
| RPUSD2   | 0.223  | 0.2151  | 1.9079 | 0.08655 | 0.2   | -4.91 | -0.6534 | none       |
| CACNA2D  | 0.384  | 0.3092  | 1.9078 | 0.08656 | 0.2   | -4.91 | -1.1828 | none       |
| SERPINB7 | -0.23  | -0.2299 | -1.908 | 0.08658 | 0.201 | -4.91 | 1.65197 | none       |
| MRPL41   | -0.331 | -0.2908 | -1.908 | 0.0866  | 0.201 | -4.91 | 1.31077 | none       |
| ANK1     | 0.251  | 0.3385  | 1.9074 | 0.08662 | 0.201 | -4.91 | -0.0553 | none       |
| RTN4RL2  | 0.265  | 0.1943  | 1.9073 | 0.08664 | 0.201 | -4.91 | 0.61214 | none       |
| DHX57    | 0.368  | 0.3782  | 1.9064 | 0.08676 | 0.201 | -4.91 | -1.0223 | none       |
| MISP3    | -0.155 | -0.1722 | -1.906 | 0.08686 | 0.201 | -4.91 | 1.78611 | none       |
| INTS9    | 0.3    | 0.2555  | 1.9054 | 0.0869  | 0.201 | -4.91 | -0.4045 | none       |
| NMRAL1   | 0.242  | 0.1403  | 1.9049 | 0.08698 | 0.201 | -4.91 | -0.1076 | none       |
| DCTPP1   | -0.307 | -0.2793 | -1.905 | 0.08699 | 0.201 | -4.91 | 1.19517 | none       |
| RPS3A    | -0.256 | -0.2606 | -1.905 | 0.08701 | 0.201 | -4.91 | 0.53306 | none       |
| TMEM87B  | -0.33  | -0.281  | -1.904 | 0.08712 | 0.201 | -4.91 | 1.64213 | none       |
| SLC35G2  | 0.193  | 0.0673  | 1.9038 | 0.08713 | 0.201 | -4.91 | -0.0103 | none       |
| ZNF777   | 0.347  | 0.4123  | 1.9035 | 0.08717 | 0.202 | -4.91 | -0.3332 | none       |
| CTTNBP2  | 0.362  | 0.2362  | 1.9035 | 0.08718 | 0.202 | -4.91 | -1.3693 | none       |
| AKR1B1   | 0.192  | 0.084   | 1.9028 | 0.08728 | 0.202 | -4.91 | -0.0963 | none       |
| BANF2    | 0.219  | 0.1572  | 1.9024 | 0.08733 | 0.202 | -4.92 | 0.80366 | none       |
| EMC7     | -0.337 | -0.3414 | -1.902 | 0.08735 | 0.202 | -4.92 | 1.35126 | none       |
| CDC42    | -0.313 | -0.3818 | -1.902 | 0.08737 | 0.202 | -4.92 | 0.56091 | none       |
| GPKOW    | 0.252  | 0.3007  | 1.9021 | 0.08737 | 0.202 | -4.92 | -0.6205 | none       |
| TRIP12   | 0.66   | 0.725   | 1.9017 | 0.08743 | 0.202 | -4.92 | -0.449  | none       |
| CD6      | 0.236  | 0.2031  | 1.9016 | 0.08745 | 0.202 | -4.92 | -0.3119 | none       |
| LUC7L2   | 0.344  | 0.4183  | 1.9016 | 0.08745 | 0.202 | -4.92 | 0.27759 | none       |

|          |        |         |        |         |       |       |         |            |
|----------|--------|---------|--------|---------|-------|-------|---------|------------|
| ZNF770   | -0.263 | -0.2514 | -1.902 | 0.08745 | 0.202 | -4.92 | 1.49254 | none       |
| SLC23A2  | 0.234  | 0.2221  | 1.9015 | 0.08746 | 0.202 | -4.92 | 0.72713 | none       |
| FOPNL    | -0.272 | -0.2436 | -1.901 | 0.08749 | 0.202 | -4.92 | 0.89087 | none       |
| ZNF76    | 0.299  | 0.3248  | 1.9011 | 0.08752 | 0.202 | -4.92 | -0.3282 | none       |
| CDC42EP3 | 0.345  | 0.2845  | 1.9008 | 0.08756 | 0.202 | -4.92 | -1.0623 | none       |
| PAIP2B   | 0.146  | 0.094   | 1.9008 | 0.08756 | 0.202 | -4.92 | -1.2358 | none       |
| ZC3H3    | 0.283  | 0.2693  | 1.9004 | 0.08761 | 0.202 | -4.92 | -0.3629 | none       |
| ITFG1    | 0.194  | 0.1594  | 1.9001 | 0.08766 | 0.202 | -4.92 | -0.4608 | none       |
| LYST     | 0.269  | 0.1409  | 1.9    | 0.08768 | 0.202 | -4.92 | -0.5447 | none       |
| CGA      | 0.385  | 0.2552  | 1.8998 | 0.0877  | 0.202 | -4.92 | -0.107  | none       |
| FBRS     | 0.403  | 0.4658  | 1.8997 | 0.08771 | 0.202 | -4.92 | -0.0142 | none       |
| SPSB4    | 0.278  | 0.2137  | 1.8997 | 0.08772 | 0.202 | -4.92 | 0.41917 | none       |
| PARG     | 0.504  | 0.5148  | 1.8997 | 0.08772 | 0.202 | -4.92 | -0.28   | none       |
| PDE4D    | 0.234  | 0.1925  | 1.8995 | 0.08775 | 0.202 | -4.92 | -0.4037 | none       |
| ACO2     | 0.322  | 0.3415  | 1.8994 | 0.08776 | 0.202 | -4.92 | -0.2397 | none       |
| NUP85    | 0.201  | 0.1539  | 1.8991 | 0.0878  | 0.202 | -4.92 | -0.7868 | none       |
| ZNF790   | 0.309  | 0.2503  | 1.899  | 0.08782 | 0.202 | -4.92 | -0.6164 | none       |
| CRTC1    | 0.329  | 0.4029  | 1.8989 | 0.08783 | 0.202 | -4.92 | -0.4756 | none       |
| TMEM52   | 0.309  | 0.1704  | 1.8989 | 0.08784 | 0.202 | -4.92 | -0.9151 | none       |
| COMMD4   | 0.284  | 0.1646  | 1.8988 | 0.08784 | 0.202 | -4.92 | -0.8199 | none       |
| RNF19A   | 0.477  | 0.4147  | 1.8987 | 0.08786 | 0.202 | -4.92 | -0.8392 | none       |
| LIN54    | 0.492  | 0.444   | 1.8985 | 0.08789 | 0.202 | -4.92 | -0.6975 | none       |
| GAGE12B  | -1.164 | -0.8074 | -1.898 | 0.08793 | 0.202 | -4.92 | 2.14239 | AA-related |
| UBE2I    | -0.217 | -0.2033 | -1.898 | 0.08795 | 0.202 | -4.92 | 1.66439 | none       |
| PLD2     | 0.462  | 0.3492  | 1.8974 | 0.08804 | 0.203 | -4.92 | -1.0551 | none       |
| TBC1D2   | 0.264  | 0.2474  | 1.8972 | 0.08808 | 0.203 | -4.92 | 0.51838 | none       |
| RAB9A    | -0.334 | -0.2708 | -1.897 | 0.08808 | 0.203 | -4.92 | 1.90755 | none       |
| REST     | 0.699  | 0.657   | 1.8969 | 0.08812 | 0.203 | -4.92 | -0.6427 | none       |
| TMEM33   | 0.332  | 0.1617  | 1.8968 | 0.08813 | 0.203 | -4.92 | -0.7812 | none       |
| SACS     | 0.422  | 0.4403  | 1.8966 | 0.08817 | 0.203 | -4.92 | 0.59195 | none       |
| PCBP3    | 0.389  | 0.3816  | 1.8965 | 0.08818 | 0.203 | -4.92 | 0.2658  | none       |
| GID8     | -0.181 | -0.1011 | -1.896 | 0.08819 | 0.203 | -4.92 | 2.18408 | AA-related |
| CNN3     | 0.307  | 0.2393  | 1.896  | 0.08825 | 0.203 | -4.92 | -0.0462 | none       |
| SMN2     | 0.697  | 0.4613  | 1.8958 | 0.08828 | 0.203 | -4.93 | -0.5636 | none       |
| PADI2    | 0.168  | 0.1217  | 1.8956 | 0.08831 | 0.203 | -4.93 | -1.0781 | none       |
| SLC22A17 | 0.425  | 0.3773  | 1.8955 | 0.08832 | 0.203 | -4.93 | -0.1129 | none       |
| RBM19    | 0.68   | 0.8063  | 1.8955 | 0.08832 | 0.203 | -4.93 | -0.4893 | none       |
| GCKR     | 0.312  | 0.3227  | 1.8955 | 0.08833 | 0.203 | -4.93 | -0.3923 | none       |
| RGS12    | 0.339  | 0.2725  | 1.8951 | 0.08837 | 0.203 | -4.93 | -0.9957 | none       |
| HIST1H3I | -1.116 | -0.9245 | -1.895 | 0.08843 | 0.203 | -4.93 | 0.86908 | none       |

|          |        |         |        |         |       |       |         |            |
|----------|--------|---------|--------|---------|-------|-------|---------|------------|
| GPR37L1  | 0.221  | 0.1501  | 1.8944 | 0.08848 | 0.203 | -4.93 | -1.3644 | none       |
| HMG1     | -0.155 | -0.1223 | -1.894 | 0.08851 | 0.203 | -4.93 | 1.89373 | none       |
| NAA40    | 0.238  | 0.1825  | 1.8937 | 0.08859 | 0.203 | -4.93 | -0.7221 | none       |
| WAC      | 0.436  | 0.4337  | 1.8936 | 0.08859 | 0.203 | -4.93 | -0.4073 | none       |
| MIS18BP1 | 0.604  | 0.6779  | 1.8933 | 0.08863 | 0.203 | -4.93 | -0.5498 | none       |
| TBCB     | 0.234  | 0.1351  | 1.8933 | 0.08864 | 0.203 | -4.93 | -0.5216 | none       |
| ZMYM3    | 0.283  | 0.3268  | 1.8932 | 0.08865 | 0.203 | -4.93 | 0.40247 | none       |
| UACA     | 0.292  | 0.2071  | 1.8931 | 0.08866 | 0.203 | -4.93 | 0.59992 | none       |
| IQCF2    | 0.355  | 0.2341  | 1.8931 | 0.08867 | 0.203 | -4.93 | -0.9413 | none       |
| OXNAD1   | -0.25  | -0.197  | -1.893 | 0.0887  | 0.203 | -4.93 | 2.05005 | none       |
| LNP1     | -0.233 | -0.295  | -1.892 | 0.08877 | 0.204 | -4.93 | 1.034   | none       |
| RNF167   | -0.178 | -0.1806 | -1.892 | 0.08882 | 0.204 | -4.93 | 0.92426 | none       |
| CDK19    | 0.377  | 0.3276  | 1.892  | 0.08883 | 0.204 | -4.93 | -1.125  | none       |
| WDR6     | 0.179  | 0.1937  | 1.8919 | 0.08884 | 0.204 | -4.93 | 0.64966 | none       |
| STAG3    | 0.253  | 0.188   | 1.8916 | 0.08888 | 0.204 | -4.93 | 0.98613 | none       |
| EXOC3    | 0.329  | 0.3333  | 1.8916 | 0.08889 | 0.204 | -4.93 | -0.0601 | none       |
| GPATCH11 | 0.315  | 0.2831  | 1.8913 | 0.08892 | 0.204 | -4.93 | -0.7418 | none       |
| DSN1     | 0.185  | 0.0709  | 1.8911 | 0.08895 | 0.204 | -4.93 | -0.164  | none       |
| ZBTB25   | 0.217  | 0.1799  | 1.8908 | 0.089   | 0.204 | -4.93 | -0.3101 | none       |
| KCNJ13   | 0.47   | 0.3936  | 1.8898 | 0.08915 | 0.204 | -4.93 | -0.9125 | none       |
| KLHL33   | 0.155  | 0.1162  | 1.8897 | 0.08916 | 0.204 | -4.93 | 0.1446  | none       |
| RAB23    | -0.243 | -0.2029 | -1.889 | 0.08927 | 0.204 | -4.94 | 1.20071 | none       |
| MYO1C    | 0.369  | 0.406   | 1.8888 | 0.08929 | 0.204 | -4.94 | -0.6152 | none       |
| KTN1     | 0.648  | 0.7172  | 1.8884 | 0.08935 | 0.205 | -4.94 | 0.21473 | none       |
| MRM1     | 0.274  | 0.2899  | 1.8883 | 0.08936 | 0.205 | -4.94 | 0.73808 | none       |
| PKN3     | 0.191  | 0.2244  | 1.8872 | 0.08952 | 0.205 | -4.94 | 0.73462 | none       |
| CHI3L2   | -0.385 | -0.3704 | -1.887 | 0.08955 | 0.205 | -4.94 | 0.09508 | none       |
| FAR1     | 0.418  | 0.3148  | 1.887  | 0.08956 | 0.205 | -4.94 | -0.3529 | none       |
| PLXNC1   | 0.586  | 0.5248  | 1.8869 | 0.08957 | 0.205 | -4.94 | -0.7277 | none       |
| CCDC152  | 0.274  | 0.2215  | 1.8865 | 0.08963 | 0.205 | -4.94 | -0.9423 | none       |
| PPDPF    | 0.34   | 0.2418  | 1.8862 | 0.08967 | 0.205 | -4.94 | -0.333  | none       |
| NDUFS4   | -0.309 | -0.3898 | -1.886 | 0.08969 | 0.205 | -4.94 | 0.46399 | none       |
| CHD8     | 0.532  | 0.5933  | 1.8856 | 0.08976 | 0.205 | -4.94 | -0.6501 | none       |
| DOLPP1   | 0.173  | 0.1597  | 1.8851 | 0.08983 | 0.205 | -4.94 | -0.4031 | none       |
| SETD2    | 0.558  | 0.6504  | 1.8849 | 0.08986 | 0.205 | -4.94 | -0.0247 | none       |
| TRPC3    | 0.227  | 0.1474  | 1.8848 | 0.08987 | 0.205 | -4.94 | -1.2522 | none       |
| CD55     | 0.18   | 0.0811  | 1.8847 | 0.08989 | 0.205 | -4.94 | -0.7788 | none       |
| ELK1     | -0.247 | -0.2152 | -1.885 | 0.08989 | 0.205 | -4.94 | 2.31183 | AA-related |
| P2RY14   | -0.247 | -0.267  | -1.884 | 0.08996 | 0.205 | -4.94 | 0.32043 | none       |
| SETD1B   | 0.422  | 0.4764  | 1.884  | 0.08999 | 0.206 | -4.94 | -0.4365 | none       |

|           |        |         |        |         |       |       |         |            |
|-----------|--------|---------|--------|---------|-------|-------|---------|------------|
| SERPINB1  | 0.15   | 0.0485  | 1.8835 | 0.09007 | 0.206 | -4.94 | 0.28588 | none       |
| CERS1     | 0.217  | 0.1643  | 1.8832 | 0.0901  | 0.206 | -4.94 | -0.387  | none       |
| KIAA0825  | 0.202  | 0.1593  | 1.8827 | 0.09018 | 0.206 | -4.94 | -0.6417 | none       |
| SEC63     | 0.427  | 0.4944  | 1.8825 | 0.09022 | 0.206 | -4.94 | -0.5929 | none       |
| IL22      | -0.357 | -0.2621 | -1.882 | 0.09024 | 0.206 | -4.95 | 1.18411 | none       |
| RNASEK-C  | -0.371 | -0.3735 | -1.882 | 0.09026 | 0.206 | -4.95 | -0.5086 | none       |
| GIMAP6    | -0.18  | -0.2029 | -1.881 | 0.09036 | 0.206 | -4.95 | 1.8041  | none       |
| RGS11     | 0.213  | 0.1166  | 1.8815 | 0.09036 | 0.206 | -4.95 | 0.4077  | none       |
| HERPUD1   | 0.149  | 0.0877  | 1.8814 | 0.09038 | 0.206 | -4.95 | -0.9397 | none       |
| ETNK1     | 0.294  | 0.2038  | 1.8813 | 0.09038 | 0.206 | -4.95 | -0.6047 | none       |
| PPP1R13B  | 0.487  | 0.4279  | 1.881  | 0.09044 | 0.206 | -4.95 | -0.9299 | none       |
| EDEM1     | 0.212  | 0.2116  | 1.8808 | 0.09047 | 0.206 | -4.95 | -0.7451 | none       |
| HHIP      | 0.328  | 0.2471  | 1.8802 | 0.09055 | 0.206 | -4.95 | -0.019  | none       |
| FGD3      | 0.444  | 0.4369  | 1.88   | 0.09058 | 0.207 | -4.95 | -0.4562 | none       |
| UBE2F-SCI | 0.207  | 0.2525  | 1.8799 | 0.09059 | 0.207 | -4.95 | -0.4125 | none       |
| ZNF555    | 0.365  | 0.3321  | 1.8795 | 0.09066 | 0.207 | -4.95 | -0.3944 | none       |
| TTPA      | 0.14   | 0.1184  | 1.8794 | 0.09067 | 0.207 | -4.95 | -0.6178 | none       |
| GTF3C1    | 0.437  | 0.5024  | 1.8791 | 0.09071 | 0.207 | -4.95 | -0.4674 | none       |
| IFI6      | -0.363 | -0.4298 | -1.879 | 0.09076 | 0.207 | -4.95 | 0.99915 | none       |
| C1QBP     | -0.298 | -0.2668 | -1.879 | 0.09079 | 0.207 | -4.95 | 1.42553 | none       |
| PDZD8     | 0.483  | 0.4739  | 1.8782 | 0.09085 | 0.207 | -4.95 | -0.9939 | none       |
| C14ORF13  | 0.238  | 0.1997  | 1.8774 | 0.09097 | 0.207 | -4.95 | -0.2781 | none       |
| PAQR4     | -0.164 | -0.0427 | -1.877 | 0.09098 | 0.207 | -4.95 | 1.59318 | none       |
| SLC25A4   | -0.243 | -0.2334 | -1.877 | 0.09103 | 0.207 | -4.95 | 2.22516 | AA-related |
| CASP6     | 0.249  | 0.1429  | 1.8767 | 0.09106 | 0.207 | -4.95 | -0.5697 | none       |
| NFKB2     | 0.37   | 0.4017  | 1.8765 | 0.0911  | 0.207 | -4.95 | -0.9917 | none       |
| SLC7A5    | -0.176 | -0.0522 | -1.876 | 0.09112 | 0.207 | -4.95 | 0.93593 | none       |
| LY6K      | 0.281  | 0.2235  | 1.8763 | 0.09112 | 0.207 | -4.95 | -1.2576 | none       |
| PRODH     | 0.333  | 0.2642  | 1.8762 | 0.09114 | 0.207 | -4.95 | -1.0997 | none       |
| NUBP1     | -0.142 | -0.0867 | -1.875 | 0.09128 | 0.208 | -4.96 | 0.27799 | none       |
| TM4SF5    | -0.153 | -0.085  | -1.875 | 0.09136 | 0.208 | -4.96 | 0.67925 | none       |
| CRYBB1    | -0.293 | -0.2029 | -1.875 | 0.09137 | 0.208 | -4.96 | 0.59095 | none       |
| ANXA5     | -0.187 | -0.2247 | -1.875 | 0.09137 | 0.208 | -4.96 | 1.66709 | none       |
| PSAT1     | -0.191 | -0.2297 | -1.875 | 0.09139 | 0.208 | -4.96 | 1.55352 | none       |
| SETX      | 0.589  | 0.6591  | 1.8745 | 0.09139 | 0.208 | -4.96 | -0.2117 | none       |
| AGR3      | 0.217  | 0.2171  | 1.8743 | 0.09142 | 0.208 | -4.96 | 0.94619 | none       |
| RPL6      | -0.192 | -0.1124 | -1.874 | 0.09143 | 0.208 | -4.96 | 2.14451 | AA-related |
| CALM1     | -0.262 | -0.1899 | -1.873 | 0.09157 | 0.208 | -4.96 | 0.99037 | none       |
| TIGD5     | 0.154  | 0.1212  | 1.8733 | 0.09157 | 0.208 | -4.96 | -1.1976 | none       |
| RECQL4    | 0.406  | 0.4647  | 1.873  | 0.09162 | 0.208 | -4.96 | -0.0798 | none       |

|           |        |         |        |         |       |       |         |      |
|-----------|--------|---------|--------|---------|-------|-------|---------|------|
| SEMA3A    | -0.398 | -0.2692 | -1.873 | 0.09164 | 0.208 | -4.96 | 1.10395 | none |
| DMXL1     | 0.406  | 0.4135  | 1.8728 | 0.09165 | 0.208 | -4.96 | -0.131  | none |
| PGF       | 0.183  | 0.1182  | 1.8726 | 0.09168 | 0.208 | -4.96 | -0.6483 | none |
| RGL2      | 0.216  | 0.1875  | 1.8724 | 0.0917  | 0.208 | -4.96 | 0.46647 | none |
| CENPC     | 0.502  | 0.4632  | 1.8722 | 0.09174 | 0.208 | -4.96 | -0.2112 | none |
| BCL2L2-PA | -0.343 | -0.3541 | -1.872 | 0.09177 | 0.208 | -4.96 | 0.97302 | none |
| WTAP      | 0.156  | 0.0926  | 1.8713 | 0.09188 | 0.209 | -4.96 | -0.0297 | none |
| MYCBP2    | 0.543  | 0.5903  | 1.8712 | 0.09188 | 0.209 | -4.96 | -0.4069 | none |
| ASPN      | -0.125 | -0.0855 | -1.871 | 0.09191 | 0.209 | -4.96 | 0.99173 | none |
| EPO       | 0.18   | 0.1346  | 1.8708 | 0.09195 | 0.209 | -4.96 | -0.3859 | none |
| ZNF350    | 0.293  | 0.1879  | 1.8707 | 0.09196 | 0.209 | -4.96 | -0.8339 | none |
| YARS2     | 0.164  | 0.102   | 1.8706 | 0.09198 | 0.209 | -4.96 | 0.83596 | none |
| MAFF      | 0.291  | 0.2914  | 1.8699 | 0.09208 | 0.209 | -4.96 | -0.0822 | none |
| KLF5      | 0.298  | 0.3906  | 1.8697 | 0.09212 | 0.209 | -4.96 | -0.3332 | none |
| TBC1D2B   | 0.362  | 0.2837  | 1.8696 | 0.09213 | 0.209 | -4.96 | 0.19404 | none |
| DEAF1     | 0.334  | 0.3313  | 1.8694 | 0.09216 | 0.209 | -4.96 | -0.2803 | none |
| WBP2NL    | 0.417  | 0.2371  | 1.8691 | 0.09221 | 0.209 | -4.96 | -1.1171 | none |
| NFRKB     | 0.442  | 0.5382  | 1.8689 | 0.09223 | 0.209 | -4.96 | -0.2294 | none |
| FAM72B    | 0.386  | 0.3825  | 1.8681 | 0.09234 | 0.209 | -4.97 | -0.9937 | none |
| STK4      | 0.449  | 0.4244  | 1.868  | 0.09237 | 0.209 | -4.97 | -0.2784 | none |
| SLX4IP    | 0.274  | 0.2309  | 1.8678 | 0.0924  | 0.209 | -4.97 | -1.1245 | none |
| SECISBP2  | 0.455  | 0.4775  | 1.8676 | 0.09242 | 0.209 | -4.97 | -0.5193 | none |
| COA3      | -0.244 | -0.2689 | -1.868 | 0.09243 | 0.209 | -4.97 | 0.41757 | none |
| COL4A2    | 0.284  | 0.2699  | 1.8676 | 0.09243 | 0.209 | -4.97 | -0.5279 | none |
| FARP2     | 0.444  | 0.4754  | 1.867  | 0.09251 | 0.209 | -4.97 | -1.0789 | none |
| VWC2      | 0.145  | 0.1138  | 1.8667 | 0.09257 | 0.21  | -4.97 | -1.2093 | none |
| CTLA4     | -0.186 | -0.1468 | -1.866 | 0.0926  | 0.21  | -4.97 | 0.80358 | none |
| LAG3      | 0.327  | 0.3974  | 1.8664 | 0.09261 | 0.21  | -4.97 | -0.1787 | none |
| NXT1      | -0.307 | -0.2626 | -1.865 | 0.09275 | 0.21  | -4.97 | 1.49183 | none |
| RNF25     | 0.35   | 0.3268  | 1.8654 | 0.09276 | 0.21  | -4.97 | -1.2061 | none |
| NROB1     | -0.279 | -0.2322 | -1.865 | 0.09277 | 0.21  | -4.97 | 0.88317 | none |
| TAS2R38   | 0.213  | 0.1506  | 1.8651 | 0.0928  | 0.21  | -4.97 | -0.7915 | none |
| RASSF2    | 0.346  | 0.3089  | 1.8649 | 0.09284 | 0.21  | -4.97 | -1.0529 | none |
| PCDH15    | 0.161  | 0.1064  | 1.8648 | 0.09285 | 0.21  | -4.97 | -0.1864 | none |
| GRAMD4    | 0.371  | 0.4347  | 1.8646 | 0.09288 | 0.21  | -4.97 | -0.4909 | none |
| BABAM1    | 0.208  | 0.1     | 1.8643 | 0.09292 | 0.21  | -4.97 | -0.3614 | none |
| MT-ND4    | 0.485  | 0.5272  | 1.8642 | 0.09294 | 0.21  | -4.97 | -0.2379 | none |
| NOC3L     | 0.443  | 0.4588  | 1.8642 | 0.09295 | 0.21  | -4.97 | -0.0657 | none |
| ZNF800    | 0.553  | 0.4942  | 1.8637 | 0.09301 | 0.21  | -4.97 | 0.40577 | none |
| PI4KA     | 0.457  | 0.5223  | 1.8637 | 0.09302 | 0.21  | -4.97 | 0.01984 | none |

|           |        |         |        |         |       |       |         |            |
|-----------|--------|---------|--------|---------|-------|-------|---------|------------|
| RNF175    | 0.33   | 0.1756  | 1.8637 | 0.09302 | 0.21  | -4.97 | -0.1758 | none       |
| AC005042  | 0.263  | 0.1644  | 1.8634 | 0.09307 | 0.21  | -4.97 | -0.1272 | none       |
| GPR21     | 0.19   | 0.1175  | 1.8632 | 0.09309 | 0.21  | -4.97 | -0.6288 | none       |
| ZNF682    | 0.326  | 0.1476  | 1.8631 | 0.0931  | 0.21  | -4.97 | 0.38149 | none       |
| TCOF1     | 0.6    | 0.7349  | 1.8631 | 0.0931  | 0.21  | -4.97 | -0.3121 | none       |
| AC008074  | -0.369 | -0.3159 | -1.863 | 0.09312 | 0.21  | -4.97 | 0.09796 | none       |
| GDPD5     | 0.392  | 0.4326  | 1.8626 | 0.09319 | 0.21  | -4.97 | -0.4023 | none       |
| YIPF7     | -0.249 | -0.169  | -1.862 | 0.09322 | 0.21  | -4.97 | 0.51509 | none       |
| EFHD1     | 0.721  | 0.6555  | 1.8622 | 0.09324 | 0.21  | -4.97 | -0.9059 | none       |
| TAF7L     | 0.152  | 0.1007  | 1.862  | 0.09327 | 0.21  | -4.98 | 0.50266 | none       |
| B9D1      | -0.227 | -0.1707 | -1.862 | 0.0933  | 0.211 | -4.98 | 2.18656 | AA-related |
| TMPO      | 0.384  | 0.4272  | 1.8615 | 0.09335 | 0.211 | -4.98 | 0.52334 | none       |
| NEURL3    | 0.201  | 0.2138  | 1.8614 | 0.09336 | 0.211 | -4.98 | -0.4565 | none       |
| TRIAP1    | -0.249 | -0.2794 | -1.861 | 0.09342 | 0.211 | -4.98 | 1.89655 | none       |
| NUDT10    | -0.189 | -0.1426 | -1.861 | 0.09342 | 0.211 | -4.98 | 1.73877 | none       |
| GTF2A2    | -0.283 | -0.3203 | -1.861 | 0.09347 | 0.211 | -4.98 | 1.13344 | none       |
| VMP1      | 0.227  | 0.1279  | 1.8607 | 0.09347 | 0.211 | -4.98 | -0.7781 | none       |
| CUTA      | -0.358 | -0.3884 | -1.861 | 0.09348 | 0.211 | -4.98 | 2.1523  | AA-related |
| KRTAP12-3 | -0.264 | -0.1763 | -1.86  | 0.09356 | 0.211 | -4.98 | 0.47004 | none       |
| BGN       | 0.466  | 0.3174  | 1.8601 | 0.09357 | 0.211 | -4.98 | -0.8092 | none       |
| ZNF575    | 0.292  | 0.2651  | 1.86   | 0.09357 | 0.211 | -4.98 | -0.2809 | none       |
| EXOG      | 0.265  | 0.1376  | 1.8599 | 0.09359 | 0.211 | -4.98 | 0.32134 | none       |
| FAH       | -0.188 | -0.1856 | -1.86  | 0.09362 | 0.211 | -4.98 | 0.55835 | none       |
| ACTN1     | 0.443  | 0.4693  | 1.8597 | 0.09362 | 0.211 | -4.98 | 0.28629 | none       |
| RPL18     | -0.321 | -0.3409 | -1.859 | 0.09372 | 0.211 | -4.98 | 0.90502 | none       |
| TTYH1     | 0.301  | 0.1987  | 1.859  | 0.09373 | 0.211 | -4.98 | 0.7979  | none       |
| RBP5      | 0.375  | 0.3538  | 1.8586 | 0.09379 | 0.211 | -4.98 | -0.76   | none       |
| TDP1      | 0.322  | 0.2536  | 1.8586 | 0.09379 | 0.211 | -4.98 | -1.0148 | none       |
| DPH7      | 0.27   | 0.2081  | 1.8583 | 0.09383 | 0.211 | -4.98 | 0.10867 | none       |
| KNL1      | 0.643  | 0.726   | 1.8582 | 0.09384 | 0.211 | -4.98 | 0.42253 | none       |
| NUDT17    | -0.304 | -0.2862 | -1.858 | 0.09389 | 0.211 | -4.98 | 2.20161 | AA-related |
| NPC2      | -0.394 | -0.4006 | -1.858 | 0.09393 | 0.211 | -4.98 | 0.56984 | none       |
| FAM120B   | 0.261  | 0.2717  | 1.8576 | 0.09395 | 0.211 | -4.98 | -0.416  | none       |
| ASCC1     | -0.219 | -0.2739 | -1.857 | 0.09403 | 0.212 | -4.98 | -0.1022 | none       |
| ZP1       | -0.195 | -0.1337 | -1.857 | 0.09405 | 0.212 | -4.98 | -0.5076 | none       |
| CRYAB     | 0.265  | 0.1986  | 1.8561 | 0.09417 | 0.212 | -4.98 | -0.1293 | none       |
| RPL8      | -0.283 | -0.2692 | -1.856 | 0.09418 | 0.212 | -4.98 | 1.95631 | none       |
| CIB1      | -0.27  | -0.2548 | -1.856 | 0.09419 | 0.212 | -4.98 | 1.16014 | none       |
| NPIP9     | -0.201 | -0.1517 | -1.856 | 0.09421 | 0.212 | -4.98 | 1.04469 | none       |
| KYAT3     | -0.198 | -0.1912 | -1.856 | 0.09424 | 0.212 | -4.98 | 2.28409 | AA-related |

|          |        |         |        |         |       |       |         |      |
|----------|--------|---------|--------|---------|-------|-------|---------|------|
| HDLBP    | 0.664  | 0.7592  | 1.8556 | 0.09424 | 0.212 | -4.98 | -0.7252 | none |
| SELP     | 0.207  | 0.145   | 1.8555 | 0.09426 | 0.212 | -4.98 | 0.28182 | none |
| SDC4     | -0.228 | -0.1933 | -1.855 | 0.09431 | 0.212 | -4.99 | -0.0375 | none |
| STX5     | 0.235  | 0.1253  | 1.8549 | 0.09436 | 0.212 | -4.99 | -0.5863 | none |
| CEP164   | 0.369  | 0.3849  | 1.8544 | 0.09443 | 0.212 | -4.99 | 0.22433 | none |
| QRICH2   | 0.246  | 0.2032  | 1.8541 | 0.09448 | 0.212 | -4.99 | 0.45378 | none |
| TMPRSS11 | -0.351 | -0.2389 | -1.854 | 0.09448 | 0.212 | -4.99 | 0.90439 | none |
| GAK      | 0.416  | 0.4588  | 1.8528 | 0.09468 | 0.213 | -4.99 | -0.1541 | none |
| ANAPC13  | -0.325 | -0.3379 | -1.853 | 0.09471 | 0.213 | -4.99 | 1.96416 | none |
| MPZL3    | 0.245  | 0.1095  | 1.8525 | 0.09472 | 0.213 | -4.99 | -1.1102 | none |
| CT47A12  | -0.173 | -0.1631 | -1.853 | 0.09472 | 0.213 | -4.99 | -0.2612 | none |
| HS3ST2   | 0.273  | 0.1934  | 1.8523 | 0.09475 | 0.213 | -4.99 | -1.2006 | none |
| CARD9    | 0.284  | 0.2738  | 1.8523 | 0.09475 | 0.213 | -4.99 | -0.355  | none |
| RPL31    | -0.355 | -0.4119 | -1.852 | 0.09479 | 0.213 | -4.99 | 1.64318 | none |
| RPS27L   | -0.337 | -0.4159 | -1.852 | 0.09487 | 0.213 | -4.99 | 1.05374 | none |
| TERF1    | 0.327  | 0.2504  | 1.8511 | 0.09493 | 0.213 | -4.99 | -0.0504 | none |
| ACYP2    | 0.373  | 0.2184  | 1.8511 | 0.09495 | 0.213 | -4.99 | -0.5309 | none |
| RPS25    | -0.328 | -0.3682 | -1.851 | 0.09496 | 0.213 | -4.99 | 1.14876 | none |
| ZSCAN9   | 0.155  | 0.1056  | 1.8507 | 0.09499 | 0.213 | -4.99 | 0.53358 | none |
| GPD1L    | 0.245  | 0.2029  | 1.8502 | 0.09507 | 0.213 | -4.99 | 0.07011 | none |
| FGF6     | -0.233 | -0.1576 | -1.85  | 0.09509 | 0.213 | -4.99 | 1.71112 | none |
| NARF     | 0.292  | 0.1769  | 1.8501 | 0.0951  | 0.213 | -4.99 | -0.4726 | none |
| PARVA    | 0.413  | 0.3379  | 1.8499 | 0.09512 | 0.213 | -4.99 | -0.0661 | none |
| OR51L1   | 0.168  | 0.1183  | 1.8498 | 0.09513 | 0.213 | -4.99 | -1.0685 | none |
| MAP3K9   | 0.256  | 0.26    | 1.8495 | 0.09519 | 0.213 | -4.99 | -1.0561 | none |
| ATP2B1   | 0.413  | 0.4665  | 1.8493 | 0.09522 | 0.213 | -4.99 | -0.7381 | none |
| HS6ST1   | 0.435  | 0.5093  | 1.8491 | 0.09525 | 0.213 | -4.99 | -0.4774 | none |
| AKAP1    | 0.43   | 0.4347  | 1.8485 | 0.09534 | 0.213 | -5    | -0.6304 | none |
| DNAJC3   | 0.399  | 0.3774  | 1.8484 | 0.09535 | 0.213 | -5    | -1.2396 | none |
| ST6GALNA | 0.485  | 0.4543  | 1.848  | 0.09541 | 0.214 | -5    | -0.0136 | none |
| ANKRD44  | 0.372  | 0.3063  | 1.8479 | 0.09544 | 0.214 | -5    | -1.0257 | none |
| S100Z    | -0.24  | -0.2226 | -1.848 | 0.09545 | 0.214 | -5    | 1.58536 | none |
| COPS9    | -0.355 | -0.3486 | -1.847 | 0.09562 | 0.214 | -5    | 1.00982 | none |
| SGSM1    | 0.345  | 0.2394  | 1.8466 | 0.09563 | 0.214 | -5    | -0.0199 | none |
| MEGF8    | 0.279  | 0.2686  | 1.8463 | 0.09568 | 0.214 | -5    | -1.116  | none |
| MAPK8IP3 | 0.371  | 0.4541  | 1.846  | 0.09572 | 0.214 | -5    | -0.0688 | none |
| LRRC3    | 0.183  | 0.121   | 1.8459 | 0.09574 | 0.214 | -5    | -1.0676 | none |
| SPI1     | -0.154 | -0.1291 | -1.846 | 0.09575 | 0.214 | -5    | 0.7773  | none |
| SF3B1    | 0.374  | 0.3356  | 1.8457 | 0.09577 | 0.214 | -5    | -0.619  | none |
| HIVEP3   | 0.436  | 0.5942  | 1.8457 | 0.09578 | 0.214 | -5    | -0.5768 | none |



|         |        |         |        |         |       |       |         |            |
|---------|--------|---------|--------|---------|-------|-------|---------|------------|
| PTGES2  | 0.159  | 0.1721  | 1.8454 | 0.09582 | 0.214 | -5    | 0.21886 | none       |
| LAMB3   | 0.2    | 0.1718  | 1.8454 | 0.09582 | 0.214 | -5    | -0.0902 | none       |
| MEX3C   | 0.153  | 0.1185  | 1.8445 | 0.09595 | 0.214 | -5    | -0.1375 | none       |
| RPLP1   | -0.34  | -0.3598 | -1.844 | 0.09597 | 0.214 | -5    | 1.86529 | none       |
| TMTC1   | 0.142  | 0.1203  | 1.8444 | 0.09598 | 0.214 | -5    | -0.6325 | none       |
| FZD4    | 0.134  | 0.0933  | 1.8441 | 0.09602 | 0.215 | -5    | -1.2499 | none       |
| JAK1    | 0.512  | 0.5875  | 1.8434 | 0.09613 | 0.215 | -5    | 0.48527 | none       |
| RPL36   | -0.29  | -0.2882 | -1.843 | 0.09618 | 0.215 | -5    | 1.76492 | none       |
| RPL30   | -0.341 | -0.4087 | -1.843 | 0.09618 | 0.215 | -5    | 1.55266 | none       |
| SF3B5   | -0.3   | -0.3179 | -1.843 | 0.09623 | 0.215 | -5    | 1.2139  | none       |
| SLC6A7  | 0.156  | 0.1562  | 1.8426 | 0.09625 | 0.215 | -5    | 1.01859 | none       |
| SEC13   | -0.144 | -0.1162 | -1.842 | 0.09631 | 0.215 | -5    | 2.22001 | AA-related |
| ACAT2   | -0.262 | -0.2505 | -1.842 | 0.09632 | 0.215 | -5    | 0.76925 | none       |
| BHLHE40 | 0.343  | 0.4044  | 1.8412 | 0.09647 | 0.215 | -5.01 | -0.6291 | none       |
| CHODL   | 0.169  | 0.1539  | 1.8406 | 0.09657 | 0.215 | -5.01 | -1.1172 | none       |
| POLR2F  | -0.319 | -0.3689 | -1.84  | 0.09661 | 0.216 | -5.01 | 0.92638 | none       |
| MASP2   | 0.36   | 0.2827  | 1.84   | 0.09666 | 0.216 | -5.01 | -0.8    | none       |
| NUDCD3  | 0.199  | 0.1606  | 1.8396 | 0.09673 | 0.216 | -5.01 | 0.11346 | none       |
| AIG1    | 0.497  | 0.3014  | 1.8395 | 0.09674 | 0.216 | -5.01 | -0.9998 | none       |
| C6      | -0.188 | -0.1465 | -1.839 | 0.09676 | 0.216 | -5.01 | -0.1108 | none       |
| CPLX4   | 0.156  | 0.1177  | 1.8394 | 0.09676 | 0.216 | -5.01 | -1.1243 | none       |
| G2E3    | 0.221  | 0.1247  | 1.839  | 0.09682 | 0.216 | -5.01 | -0.8211 | none       |
| PPP6R1  | 0.382  | 0.406   | 1.8387 | 0.09687 | 0.216 | -5.01 | -0.494  | none       |
| NGLY1   | 0.139  | 0.069   | 1.8383 | 0.09693 | 0.216 | -5.01 | 0.49421 | none       |
| AMY2A   | -0.167 | -0.1403 | -1.838 | 0.09695 | 0.216 | -5.01 | 1.35324 | none       |
| IDH3G   | -0.16  | -0.1172 | -1.838 | 0.09698 | 0.216 | -5.01 | 1.07896 | none       |
| NFE2L3  | 0.353  | 0.3893  | 1.838  | 0.09698 | 0.216 | -5.01 | -0.6172 | none       |
| RPS3    | -0.372 | -0.3962 | -1.838 | 0.09703 | 0.216 | -5.01 | 0.9619  | none       |
| PRPF40B | 0.342  | 0.3817  | 1.8373 | 0.09709 | 0.216 | -5.01 | -1.0909 | none       |
| TMEM211 | -0.162 | -0.1479 | -1.837 | 0.09715 | 0.216 | -5.01 | -0.0217 | none       |
| ADAM10  | 0.406  | 0.3973  | 1.8364 | 0.09723 | 0.217 | -5.01 | -0.1378 | none       |
| TXNRD1  | 0.147  | 0.0826  | 1.8362 | 0.09725 | 0.217 | -5.01 | 0.23374 | none       |
| MAGOHB  | -0.371 | -0.3728 | -1.836 | 0.09729 | 0.217 | -5.01 | 1.18547 | none       |
| RNF112  | 0.212  | 0.1478  | 1.8358 | 0.09732 | 0.217 | -5.01 | 0.1841  | none       |
| DIS3L2  | 0.471  | 0.4297  | 1.8354 | 0.09739 | 0.217 | -5.01 | -0.7858 | none       |
| PIGU    | -0.432 | -0.3873 | -1.835 | 0.09751 | 0.217 | -5.02 | 2.22944 | AA-related |
| MAN2B1  | 0.318  | 0.2788  | 1.8346 | 0.09752 | 0.217 | -5.02 | -0.1922 | none       |
| FRY     | -0.412 | -0.3047 | -1.834 | 0.09767 | 0.217 | -5.02 | 0.63239 | none       |
| RPP40   | -0.359 | -0.3569 | -1.833 | 0.0977  | 0.217 | -5.02 | 1.9077  | none       |
| INPP5A  | 0.304  | 0.2996  | 1.8331 | 0.09775 | 0.217 | -5.02 | 0.54467 | none       |

|          |        |         |        |         |       |       |         |            |
|----------|--------|---------|--------|---------|-------|-------|---------|------------|
| TYW1B    | 0.334  | 0.2429  | 1.833  | 0.09776 | 0.217 | -5.02 | -0.5077 | none       |
| CACNA2D1 | 0.169  | 0.1408  | 1.8323 | 0.09788 | 0.218 | -5.02 | 0.17358 | none       |
| VAMP1    | 0.229  | 0.2013  | 1.8321 | 0.09791 | 0.218 | -5.02 | 0.0906  | none       |
| PAK4     | 0.428  | 0.4129  | 1.8314 | 0.09802 | 0.218 | -5.02 | -0.3892 | none       |
| RIC8B    | 0.364  | 0.3353  | 1.8314 | 0.09803 | 0.218 | -5.02 | -0.2104 | none       |
| PGR      | -0.179 | -0.1225 | -1.83  | 0.09822 | 0.218 | -5.02 | 0.82582 | none       |
| ECI2     | -0.217 | -0.2269 | -1.83  | 0.09822 | 0.218 | -5.02 | 0.91644 | none       |
| TERB2    | 0.632  | 0.5536  | 1.8297 | 0.09829 | 0.218 | -5.02 | 1.17226 | none       |
| TAL2     | 0.185  | 0.1475  | 1.8296 | 0.0983  | 0.218 | -5.02 | 0.69671 | none       |
| CENPW    | -0.338 | -0.3477 | -1.829 | 0.09834 | 0.218 | -5.02 | 2.0921  | AA-related |
| ARMCX6   | -0.188 | -0.1571 | -1.829 | 0.09834 | 0.218 | -5.02 | 1.55829 | none       |
| ELOVL5   | -0.266 | -0.293  | -1.829 | 0.09839 | 0.218 | -5.02 | 1.90952 | none       |
| PLEC     | 0.423  | 0.5051  | 1.829  | 0.0984  | 0.218 | -5.02 | -0.0132 | none       |
| PHF21A   | 0.361  | 0.454   | 1.8288 | 0.09844 | 0.219 | -5.02 | 0.42875 | none       |
| CACNA1E  | 0.255  | 0.1715  | 1.8286 | 0.09846 | 0.219 | -5.02 | -0.1459 | none       |
| CCDC85C  | 0.229  | 0.1404  | 1.8283 | 0.09851 | 0.219 | -5.02 | -0.3051 | none       |
| TP53I3   | -0.22  | -0.1929 | -1.828 | 0.09851 | 0.219 | -5.02 | 1.9929  | none       |
| SCGB1D4  | 0.2    | 0.1998  | 1.8277 | 0.0986  | 0.219 | -5.03 | 1.07091 | none       |
| PLAUR    | 0.26   | 0.1903  | 1.8272 | 0.09869 | 0.219 | -5.03 | -0.8034 | none       |
| OR52N4   | 0.277  | 0.1596  | 1.827  | 0.09873 | 0.219 | -5.03 | -0.7787 | none       |
| TBC1D14  | 0.301  | 0.3433  | 1.8262 | 0.09885 | 0.219 | -5.03 | -0.227  | none       |
| DCTN1    | 0.485  | 0.554   | 1.826  | 0.09889 | 0.219 | -5.03 | 0.11525 | none       |
| MRPS28   | 0.287  | 0.1104  | 1.8255 | 0.09896 | 0.219 | -5.03 | -0.9965 | none       |
| YAP1     | 0.202  | 0.204   | 1.8251 | 0.09903 | 0.22  | -5.03 | 0.18148 | none       |
| HNRNPH1  | 0.343  | 0.3983  | 1.825  | 0.09905 | 0.22  | -5.03 | -0.7496 | none       |
| ZNF692   | 0.296  | 0.3523  | 1.8246 | 0.09911 | 0.22  | -5.03 | -0.1856 | none       |
| SMYD5    | 0.21   | 0.1784  | 1.824  | 0.0992  | 0.22  | -5.03 | -0.0769 | none       |
| PCDHGA9  | 0.142  | 0.1458  | 1.8234 | 0.0993  | 0.22  | -5.03 | 0.75431 | none       |
| PRRC1    | 0.336  | 0.2283  | 1.8233 | 0.09931 | 0.22  | -5.03 | -0.6564 | none       |
| AMOTL2   | -0.208 | -0.1654 | -1.823 | 0.09933 | 0.22  | -5.03 | -0.157  | none       |
| CLDN9    | 0.148  | 0.0958  | 1.8225 | 0.09945 | 0.22  | -5.03 | 0.18068 | none       |
| TNFRSF25 | 0.296  | 0.2035  | 1.8223 | 0.09947 | 0.22  | -5.03 | -0.7989 | none       |
| SNAI3    | 0.194  | 0.1007  | 1.8223 | 0.09948 | 0.22  | -5.03 | -0.1904 | none       |
| LMAN2L   | -0.338 | -0.3347 | -1.822 | 0.09949 | 0.22  | -5.03 | 1.77547 | none       |
| RWDD1    | -0.175 | -0.1647 | -1.822 | 0.09949 | 0.22  | -5.03 | 1.50151 | none       |
| ITGA4    | 0.291  | 0.2958  | 1.8221 | 0.0995  | 0.22  | -5.03 | 0.93796 | none       |
| FBXO40   | 0.207  | 0.153   | 1.8219 | 0.09954 | 0.22  | -5.03 | -0.2505 | none       |
| ERBB3    | 0.54   | 0.3551  | 1.8216 | 0.09959 | 0.22  | -5.03 | -0.6028 | none       |
| CDK5     | -0.265 | -0.2711 | -1.821 | 0.09964 | 0.22  | -5.03 | 0.86676 | none       |
| CLPTM1   | 0.2    | 0.2082  | 1.8212 | 0.09965 | 0.22  | -5.03 | 0.78396 | none       |

|          |        |         |        |         |       |       |         |      |
|----------|--------|---------|--------|---------|-------|-------|---------|------|
| RNF41    | 0.278  | 0.1532  | 1.8211 | 0.09966 | 0.22  | -5.04 | -0.3036 | none |
| ODF3     | 0.28   | 0.1946  | 1.8208 | 0.09971 | 0.221 | -5.04 | -0.4359 | none |
| ZBTB24   | 0.331  | 0.3468  | 1.8208 | 0.09971 | 0.221 | -5.04 | -0.9913 | none |
| KIAA1755 | 0.151  | 0.1139  | 1.8206 | 0.09974 | 0.221 | -5.04 | -0.8873 | none |
| GRHL2    | -0.168 | -0.1265 | -1.821 | 0.09976 | 0.221 | -5.04 | -0.4503 | none |
| PLEKHA4  | 0.323  | 0.2229  | 1.8199 | 0.09986 | 0.221 | -5.04 | -0.4871 | none |
| TRAPPC12 | -0.365 | -0.134  | -1.82  | 0.09987 | 0.221 | -5.04 | 1.14554 | none |
| DNAJC27  | 0.318  | 0.3597  | 1.8194 | 0.09994 | 0.221 | -5.04 | 1.38717 | none |
| KIAA0391 | -0.202 | -0.2418 | -1.819 | 0.09995 | 0.221 | -5.04 | 0.99795 | none |
| POLN     | 0.425  | 0.271   | 1.8191 | 0.09999 | 0.221 | -5.04 | -0.935  | none |
| CHD9     | 0.289  | 0.3141  | 1.8185 | 0.10009 | 0.221 | -5.04 | 0.13648 | none |
| FAM20C   | -0.132 | -0.1245 | -1.818 | 0.10015 | 0.221 | -5.04 | -0.1307 | none |
| TBC1D7   | 0.281  | 0.1744  | 1.818  | 0.10016 | 0.221 | -5.04 | -0.3232 | none |
| RGL4     | 0.423  | 0.2226  | 1.8177 | 0.10022 | 0.221 | -5.04 | 0.10895 | none |
| TIMM13   | -0.236 | -0.2126 | -1.817 | 0.10025 | 0.221 | -5.04 | 1.22443 | none |
| GNPNAT1  | 0.213  | 0.0825  | 1.8173 | 0.10028 | 0.221 | -5.04 | 0.64515 | none |
| APOBR    | 0.346  | 0.3536  | 1.817  | 0.10034 | 0.221 | -5.04 | -0.5621 | none |
| VWA1     | 0.271  | 0.2935  | 1.8169 | 0.10035 | 0.221 | -5.04 | -0.0576 | none |
| ATP10D   | 0.491  | 0.3829  | 1.8167 | 0.10037 | 0.222 | -5.04 | -0.5423 | none |
| SHMT1    | 0.189  | 0.1224  | 1.8163 | 0.10045 | 0.222 | -5.04 | -0.3966 | none |
| RANBP1   | -0.153 | -0.0432 | -1.816 | 0.10045 | 0.222 | -5.04 | 0.30885 | none |
| BEX1     | -0.183 | -0.1503 | -1.816 | 0.10057 | 0.222 | -5.04 | 0.5215  | none |
| GKAP1    | 0.646  | 0.4339  | 1.8154 | 0.10059 | 0.222 | -5.04 | -0.6227 | none |
| MAGI1    | 0.169  | 0.1699  | 1.8153 | 0.10061 | 0.222 | -5.04 | -0.2342 | none |
| AGAP4    | 0.724  | 0.6722  | 1.8153 | 0.10061 | 0.222 | -5.04 | -0.5423 | none |
| NNAT     | -0.181 | -0.1337 | -1.815 | 0.10066 | 0.222 | -5.04 | 0.73771 | none |
| NGEF     | 0.202  | 0.1429  | 1.8144 | 0.10076 | 0.222 | -5.04 | 0.14946 | none |
| CCDC189  | -0.153 | -0.1345 | -1.814 | 0.10078 | 0.222 | -5.05 | 0.32545 | none |
| UBE2Z    | 0.361  | 0.2968  | 1.8142 | 0.10079 | 0.222 | -5.05 | 0.31777 | none |
| APOBEC2  | 0.354  | 0.2075  | 1.8141 | 0.1008  | 0.222 | -5.05 | -0.9435 | none |
| ENPP2    | 0.164  | 0.1459  | 1.8141 | 0.10081 | 0.222 | -5.05 | 0.72161 | none |
| PRDM11   | 0.177  | 0.1461  | 1.8139 | 0.10084 | 0.222 | -5.05 | -0.4399 | none |
| AMHR2    | 0.24   | 0.2413  | 1.8134 | 0.10092 | 0.222 | -5.05 | -0.868  | none |
| CYP21A2  | 0.235  | 0.1823  | 1.8134 | 0.10092 | 0.222 | -5.05 | -0.3118 | none |
| UBXN8    | 0.203  | 0.0616  | 1.8133 | 0.10093 | 0.222 | -5.05 | -0.5247 | none |
| NDUFA13  | -0.293 | -0.2771 | -1.813 | 0.10099 | 0.222 | -5.05 | 0.708   | none |
| LIN28B   | 0.338  | 0.2199  | 1.8128 | 0.10102 | 0.222 | -5.05 | -0.9111 | none |
| ZNF337   | 0.301  | 0.2883  | 1.8127 | 0.10104 | 0.222 | -5.05 | -1.0176 | none |
| BTBD3    | -0.204 | -0.219  | -1.813 | 0.10104 | 0.222 | -5.05 | 0.35159 | none |
| NRL      | 0.158  | 0.1265  | 1.8126 | 0.10105 | 0.222 | -5.05 | -0.6253 | none |

|          |        |         |        |         |       |       |         |      |
|----------|--------|---------|--------|---------|-------|-------|---------|------|
| LSR      | 0.337  | 0.1965  | 1.8121 | 0.10113 | 0.223 | -5.05 | -0.6348 | none |
| ARL6IP4  | -0.165 | -0.102  | -1.812 | 0.10113 | 0.223 | -5.05 | 1.24011 | none |
| REG4     | -0.204 | -0.2188 | -1.812 | 0.10117 | 0.223 | -5.05 | 1.33829 | none |
| GMNN     | -0.156 | -0.1713 | -1.812 | 0.10121 | 0.223 | -5.05 | 1.34051 | none |
| CIB2     | 0.555  | 0.2759  | 1.8106 | 0.10137 | 0.223 | -5.05 | -0.4832 | none |
| SPPL2B   | 0.231  | 0.2608  | 1.8105 | 0.10139 | 0.223 | -5.05 | 1.17878 | none |
| NUDCD2   | -0.273 | -0.2955 | -1.81  | 0.10143 | 0.223 | -5.05 | 1.29534 | none |
| JMJD8    | 0.244  | 0.2603  | 1.8098 | 0.1015  | 0.223 | -5.05 | -0.2722 | none |
| CXORF40A | -0.227 | -0.2111 | -1.81  | 0.10154 | 0.223 | -5.05 | 1.31166 | none |
| SMS      | -0.129 | -0.1285 | -1.809 | 0.10158 | 0.223 | -5.05 | 1.6192  | none |
| JMY      | 0.264  | 0.2805  | 1.8093 | 0.10159 | 0.223 | -5.05 | -0.545  | none |
| STK40    | 0.229  | 0.2546  | 1.809  | 0.10164 | 0.223 | -5.05 | 0.09168 | none |
| THPO     | -0.494 | -0.3729 | -1.809 | 0.10167 | 0.223 | -5.05 | 0.41223 | none |
| TMEM208  | -0.348 | -0.3621 | -1.809 | 0.10167 | 0.223 | -5.05 | 1.62837 | none |
| MAMDC4   | 0.224  | 0.2367  | 1.8088 | 0.10168 | 0.223 | -5.05 | -0.7916 | none |
| ARPC1A   | -0.169 | -0.1746 | -1.809 | 0.10169 | 0.223 | -5.05 | 1.22473 | none |
| ARHGAP5  | 0.425  | 0.3983  | 1.8086 | 0.1017  | 0.223 | -5.05 | 0.34016 | none |
| SH3GLB2  | 0.225  | 0.2537  | 1.808  | 0.10181 | 0.224 | -5.05 | 0.40458 | none |
| LBHD1    | 0.259  | 0.1948  | 1.808  | 0.10181 | 0.224 | -5.05 | -0.6412 | none |
| ZFYVE1   | 0.2    | 0.2148  | 1.8078 | 0.10183 | 0.224 | -5.05 | 0.67749 | none |
| PRSS21   | 0.377  | 0.3002  | 1.8076 | 0.10187 | 0.224 | -5.05 | -0.6423 | none |
| TGIF1    | 0.218  | 0.1685  | 1.8074 | 0.1019  | 0.224 | -5.05 | -0.4278 | none |
| TBCC     | 0.206  | 0.1655  | 1.8068 | 0.102   | 0.224 | -5.06 | -0.9794 | none |
| AC021106 | 0.301  | 0.3111  | 1.8066 | 0.10204 | 0.224 | -5.06 | -0.038  | none |
| PLCB2    | 0.452  | 0.3959  | 1.8066 | 0.10204 | 0.224 | -5.06 | -0.3983 | none |
| OSBPL11  | 0.329  | 0.3842  | 1.8061 | 0.10212 | 0.224 | -5.06 | 0.50071 | none |
| SDR39U1  | 0.163  | 0.1114  | 1.8059 | 0.10215 | 0.224 | -5.06 | 0.74519 | none |
| SSPO     | 0.369  | 0.3599  | 1.8055 | 0.10221 | 0.224 | -5.06 | -0.5364 | none |
| TMEM201  | 0.182  | 0.1589  | 1.8055 | 0.10222 | 0.224 | -5.06 | 0.47462 | none |
| XCL1     | -0.199 | -0.2073 | -1.805 | 0.10225 | 0.224 | -5.06 | 0.23006 | none |
| FNDC5    | 0.274  | 0.198   | 1.8052 | 0.10226 | 0.224 | -5.06 | 0.41627 | none |
| C9ORF153 | 0.182  | 0.168   | 1.805  | 0.10229 | 0.224 | -5.06 | -0.6039 | none |
| FAM71F1  | 0.212  | 0.2116  | 1.8046 | 0.10236 | 0.224 | -5.06 | -0.2744 | none |
| PDGFC    | 0.208  | 0.1648  | 1.8045 | 0.10238 | 0.224 | -5.06 | -0.7504 | none |
| AMER2    | 0.119  | 0.0932  | 1.8043 | 0.10242 | 0.224 | -5.06 | -0.1509 | none |
| ZSCAN30  | 0.304  | 0.3715  | 1.8036 | 0.10253 | 0.225 | -5.06 | -0.5131 | none |
| HFM1     | -0.235 | -0.16   | -1.804 | 0.10253 | 0.225 | -5.06 | -0.129  | none |
| PRDX4    | -0.336 | -0.3478 | -1.804 | 0.10254 | 0.225 | -5.06 | 1.02433 | none |
| SOX12    | 0.162  | 0.1615  | 1.8032 | 0.1026  | 0.225 | -5.06 | -1.1058 | none |
| ALDH9A1  | -0.187 | -0.2073 | -1.803 | 0.10263 | 0.225 | -5.06 | 1.08192 | none |

|          |        |         |        |         |       |       |         |      |
|----------|--------|---------|--------|---------|-------|-------|---------|------|
| HOXB2    | 0.187  | 0.1459  | 1.803  | 0.10263 | 0.225 | -5.06 | 0.64454 | none |
| FKBP15   | 0.325  | 0.3746  | 1.8029 | 0.10265 | 0.225 | -5.06 | 0.22543 | none |
| PRCP     | 0.308  | 0.1467  | 1.8028 | 0.10267 | 0.225 | -5.06 | -0.8327 | none |
| CLEC4E   | 0.151  | 0.1049  | 1.8026 | 0.10269 | 0.225 | -5.06 | 0.58634 | none |
| PEX13    | 0.218  | 0.0856  | 1.8023 | 0.10274 | 0.225 | -5.06 | -0.2754 | none |
| OLA1     | -0.158 | -0.1931 | -1.802 | 0.10276 | 0.225 | -5.06 | 1.84557 | none |
| ZDHHC14  | 0.303  | 0.1882  | 1.802  | 0.10279 | 0.225 | -5.06 | 0.1746  | none |
| SLC30A1  | 0.187  | 0.1396  | 1.8018 | 0.10283 | 0.225 | -5.06 | 0.10571 | none |
| GAL3ST4  | 0.225  | 0.1323  | 1.8017 | 0.10284 | 0.225 | -5.06 | -0.3645 | none |
| PWP1     | -0.151 | -0.1467 | -1.802 | 0.10287 | 0.225 | -5.06 | 1.07526 | none |
| RFT1     | -0.252 | -0.2721 | -1.801 | 0.103   | 0.225 | -5.06 | 0.73777 | none |
| HIST1H4A | -0.333 | -0.2942 | -1.801 | 0.10301 | 0.225 | -5.06 | 0.77133 | none |
| MATR3    | 0.362  | 0.3337  | 1.8    | 0.10312 | 0.225 | -5.07 | 0.095   | none |
| RFC4     | -0.157 | -0.1337 | -1.8   | 0.10321 | 0.226 | -5.07 | 1.28758 | none |
| CIAO1    | -0.166 | -0.1011 | -1.799 | 0.10336 | 0.226 | -5.07 | 0.89947 | none |
| ATXN10   | -0.137 | -0.126  | -1.798 | 0.10347 | 0.226 | -5.07 | 1.38022 | none |
| PCED1A   | 0.358  | 0.2212  | 1.7972 | 0.10359 | 0.226 | -5.07 | 0.88946 | none |
| PLCXD2   | 0.187  | 0.1668  | 1.797  | 0.10363 | 0.226 | -5.07 | -1.1824 | none |
| C16ORF74 | 0.225  | 0.2032  | 1.7966 | 0.1037  | 0.226 | -5.07 | -0.4072 | none |
| EPHA1    | 0.274  | 0.1509  | 1.7963 | 0.10374 | 0.227 | -5.07 | -1.2271 | none |
| ISYNA1   | -0.197 | -0.1688 | -1.796 | 0.10378 | 0.227 | -5.07 | 1.70452 | none |
| TIMELESS | 0.306  | 0.3556  | 1.796  | 0.10379 | 0.227 | -5.07 | -0.0365 | none |
| MOXD1    | 0.194  | 0.1725  | 1.796  | 0.10379 | 0.227 | -5.07 | 0.44894 | none |
| WDR44    | 0.285  | 0.3408  | 1.796  | 0.1038  | 0.227 | -5.07 | 0.53308 | none |
| CCDC106  | -0.26  | -0.1524 | -1.796 | 0.10382 | 0.227 | -5.07 | 1.6528  | none |
| LZTR1    | 0.243  | 0.2675  | 1.7958 | 0.10383 | 0.227 | -5.07 | 0.04756 | none |
| TRDMT1   | -0.283 | -0.3133 | -1.796 | 0.10385 | 0.227 | -5.07 | -0.0286 | none |
| TUT1     | 0.199  | 0.1959  | 1.7955 | 0.10387 | 0.227 | -5.07 | 0.19857 | none |
| MBTPS2   | 0.265  | 0.1547  | 1.7955 | 0.10388 | 0.227 | -5.07 | -0.839  | none |
| NRXN1    | 0.294  | 0.2551  | 1.7954 | 0.1039  | 0.227 | -5.07 | -0.1581 | none |
| SH3BP4   | 0.262  | 0.2718  | 1.7952 | 0.10392 | 0.227 | -5.07 | -0.0851 | none |
| CLP1     | -0.256 | -0.2329 | -1.795 | 0.10393 | 0.227 | -5.07 | 2.04744 | none |
| TEX11    | 0.216  | 0.1571  | 1.7948 | 0.10399 | 0.227 | -5.07 | 0.1012  | none |
| TXNL1    | -0.189 | -0.2203 | -1.793 | 0.10424 | 0.227 | -5.08 | 1.59193 | none |
| TBC1D3L  | 0.342  | 0.3553  | 1.7933 | 0.10424 | 0.227 | -5.08 | -0.3168 | none |
| AQR      | 0.337  | 0.3054  | 1.793  | 0.10429 | 0.227 | -5.08 | -0.8192 | none |
| COX7B    | -0.272 | -0.3329 | -1.793 | 0.1043  | 0.227 | -5.08 | 1.48988 | none |
| CHD6     | 0.395  | 0.3644  | 1.793  | 0.1043  | 0.227 | -5.08 | -0.6742 | none |
| CD84     | 0.397  | 0.3281  | 1.7929 | 0.10431 | 0.227 | -5.08 | -0.9783 | none |
| PIEZO1   | 0.513  | 0.6148  | 1.7929 | 0.10432 | 0.227 | -5.08 | -0.3754 | none |

|         |        |         |        |         |       |       |         |      |
|---------|--------|---------|--------|---------|-------|-------|---------|------|
| RNF19B  | 0.176  | 0.1652  | 1.7927 | 0.10435 | 0.227 | -5.08 | 0.11962 | none |
| PTH1R   | 0.151  | 0.1401  | 1.7927 | 0.10435 | 0.227 | -5.08 | 0.40905 | none |
| PEX7    | 0.366  | 0.1611  | 1.7921 | 0.10444 | 0.227 | -5.08 | -0.6027 | none |
| UNC45A  | 0.277  | 0.2916  | 1.7921 | 0.10444 | 0.227 | -5.08 | -0.4553 | none |
| TTI1    | 0.18   | 0.2445  | 1.792  | 0.10446 | 0.227 | -5.08 | -0.2314 | none |
| STOML1  | 0.221  | 0.2027  | 1.7916 | 0.10453 | 0.228 | -5.08 | 0.08465 | none |
| TWF2    | -0.188 | -0.1564 | -1.791 | 0.10459 | 0.228 | -5.08 | 1.86596 | none |
| SYT11   | 0.282  | 0.2734  | 1.7908 | 0.10466 | 0.228 | -5.08 | -0.6322 | none |
| FGF7    | 0.176  | 0.1274  | 1.7906 | 0.1047  | 0.228 | -5.08 | -0.746  | none |
| MKS1    | -0.202 | -0.1665 | -1.791 | 0.10471 | 0.228 | -5.08 | 0.96835 | none |
| MSL3    | 0.206  | 0.1268  | 1.7897 | 0.10486 | 0.228 | -5.08 | -1.063  | none |
| ANGEL1  | 0.196  | 0.1165  | 1.7896 | 0.10487 | 0.228 | -5.08 | -0.5519 | none |
| KCTD12  | 0.155  | 0.171   | 1.7889 | 0.10499 | 0.228 | -5.08 | -0.0424 | none |
| F11     | -0.16  | -0.1312 | -1.789 | 0.10499 | 0.228 | -5.08 | 0.50993 | none |
| SBF1    | 0.335  | 0.3914  | 1.7889 | 0.10499 | 0.228 | -5.08 | -0.1664 | none |
| NSMCE3  | 0.183  | 0.1269  | 1.7887 | 0.10502 | 0.228 | -5.08 | -1.2423 | none |
| HEG1    | 0.265  | 0.3305  | 1.7885 | 0.10505 | 0.228 | -5.08 | 0.91916 | none |
| HJURP   | 0.321  | 0.3306  | 1.7883 | 0.10509 | 0.228 | -5.08 | 0.3918  | none |
| PTGDS   | 0.358  | 0.2757  | 1.7881 | 0.10512 | 0.228 | -5.08 | 0.08212 | none |
| PNOC    | 0.356  | 0.2912  | 1.7872 | 0.10527 | 0.229 | -5.08 | 0.71987 | none |
| KIF3C   | -0.295 | -0.1563 | -1.787 | 0.10539 | 0.229 | -5.09 | 0.71336 | none |
| BLZF1   | 0.391  | 0.313   | 1.7863 | 0.10543 | 0.229 | -5.09 | -0.0889 | none |
| ZDHHC1  | 0.148  | 0.2051  | 1.7862 | 0.10545 | 0.229 | -5.09 | 0.86579 | none |
| SETD4   | 0.388  | 0.241   | 1.7861 | 0.10546 | 0.229 | -5.09 | -0.274  | none |
| CCDC88B | 0.567  | 0.6289  | 1.7859 | 0.1055  | 0.229 | -5.09 | -0.4599 | none |
| MTRNR2L | -0.19  | -0.1851 | -1.786 | 0.10551 | 0.229 | -5.09 | 1.16715 | none |
| PDIA6   | -0.186 | -0.1698 | -1.786 | 0.10556 | 0.229 | -5.09 | 1.45473 | none |
| PRR12   | 0.351  | 0.4017  | 1.7852 | 0.10561 | 0.229 | -5.09 | -0.1077 | none |
| ANKRD53 | -0.263 | -0.3146 | -1.785 | 0.10561 | 0.229 | -5.09 | 0.6135  | none |
| ZNF420  | 0.337  | 0.1345  | 1.785  | 0.10565 | 0.229 | -5.09 | -0.1308 | none |
| KCTD9   | 0.184  | 0.1095  | 1.7849 | 0.10566 | 0.229 | -5.09 | -1.0406 | none |
| DNMT3L  | -0.15  | -0.0997 | -1.785 | 0.10569 | 0.229 | -5.09 | -0.1475 | none |
| RPL36A  | -0.298 | -0.3305 | -1.784 | 0.10585 | 0.23  | -5.09 | 1.22179 | none |
| FGFR2   | 0.374  | 0.2366  | 1.7832 | 0.10595 | 0.23  | -5.09 | -0.6963 | none |
| PPP3CB  | -0.394 | -0.3805 | -1.783 | 0.10601 | 0.23  | -5.09 | 1.68152 | none |
| MRPL43  | -0.271 | -0.2606 | -1.783 | 0.10604 | 0.23  | -5.09 | 1.4427  | none |
| RNF114  | 0.325  | 0.2095  | 1.782  | 0.10616 | 0.23  | -5.09 | -0.7085 | none |
| REN     | 0.132  | 0.1319  | 1.782  | 0.10616 | 0.23  | -5.09 | 0.75649 | none |
| ISCU    | -0.222 | -0.2085 | -1.781 | 0.10626 | 0.23  | -5.09 | 1.82684 | none |
| KISS1R  | -0.193 | -0.1316 | -1.781 | 0.10633 | 0.23  | -5.09 | 0.71241 | none |

|          |        |         |        |         |       |       |         |            |
|----------|--------|---------|--------|---------|-------|-------|---------|------------|
| LDB2     | 0.184  | 0.1861  | 1.7809 | 0.10635 | 0.23  | -5.09 | 0.97429 | none       |
| OR2J3    | 0.141  | 0.0963  | 1.7808 | 0.10637 | 0.23  | -5.09 | -1.5539 | OA-related |
| RPS15    | -0.328 | -0.3307 | -1.781 | 0.10637 | 0.23  | -5.09 | 2.2341  | AA-related |
| OSR2     | -0.224 | -0.1965 | -1.78  | 0.10644 | 0.231 | -5.09 | 2.00256 | none       |
| RASGRP2  | 0.374  | 0.2659  | 1.7795 | 0.10659 | 0.231 | -5.1  | 0.89894 | none       |
| GAL      | 0.308  | 0.3316  | 1.7795 | 0.1066  | 0.231 | -5.1  | 1.67067 | none       |
| KMT2C    | 0.392  | 0.5318  | 1.7793 | 0.10662 | 0.231 | -5.1  | -0.5526 | none       |
| ZCCHC17  | -0.187 | -0.2188 | -1.779 | 0.10663 | 0.231 | -5.1  | 0.78159 | none       |
| RET      | 0.15   | 0.1977  | 1.779  | 0.10668 | 0.231 | -5.1  | 0.65381 | none       |
| SURF4    | -0.236 | -0.231  | -1.779 | 0.1067  | 0.231 | -5.1  | 2.09788 | AA-related |
| COPS6    | 0.208  | 0.136   | 1.7787 | 0.10673 | 0.231 | -5.1  | -0.8837 | none       |
| SLC6A13  | -0.336 | -0.3341 | -1.778 | 0.10683 | 0.231 | -5.1  | 1.15831 | none       |
| PANX2    | 0.253  | 0.2441  | 1.7773 | 0.10696 | 0.231 | -5.1  | -1.269  | none       |
| ZMAT2    | -0.195 | -0.1643 | -1.777 | 0.10698 | 0.231 | -5.1  | 2.08511 | none       |
| THOP1    | 0.26   | 0.308   | 1.7771 | 0.107   | 0.231 | -5.1  | -0.2452 | none       |
| SLTM     | 0.496  | 0.6022  | 1.7769 | 0.10704 | 0.231 | -5.1  | 0.05052 | none       |
| ACTG2    | 0.246  | 0.0763  | 1.7765 | 0.10711 | 0.232 | -5.1  | 0.0424  | none       |
| DGAT2L6  | -0.16  | -0.1553 | -1.776 | 0.10712 | 0.232 | -5.1  | 1.34828 | none       |
| RTF1     | 0.495  | 0.484   | 1.7764 | 0.10713 | 0.232 | -5.1  | -0.6813 | none       |
| TYMP     | 0.278  | 0.226   | 1.7762 | 0.10716 | 0.232 | -5.1  | -0.1043 | none       |
| NSMCE1   | 0.236  | 0.0768  | 1.7759 | 0.10722 | 0.232 | -5.1  | -0.2351 | none       |
| SCN4B    | 0.174  | 0.129   | 1.7754 | 0.10729 | 0.232 | -5.1  | 0.06303 | none       |
| RTP3     | -0.179 | -0.1793 | -1.775 | 0.10734 | 0.232 | -5.1  | 0.8507  | none       |
| UHRF1    | 0.506  | 0.5775  | 1.7749 | 0.10738 | 0.232 | -5.1  | 0.29336 | none       |
| IGBP1    | -0.222 | -0.2079 | -1.775 | 0.1074  | 0.232 | -5.1  | 1.14314 | none       |
| FAM200B  | 0.375  | 0.1538  | 1.7748 | 0.1074  | 0.232 | -5.1  | 0.22895 | none       |
| GGTLC2   | 0.258  | 0.265   | 1.7746 | 0.10743 | 0.232 | -5.1  | 1.58762 | none       |
| CDK2     | -0.197 | -0.2004 | -1.774 | 0.10751 | 0.232 | -5.1  | 2.09478 | AA-related |
| RPS19    | -0.256 | -0.228  | -1.774 | 0.10754 | 0.232 | -5.1  | 0.98425 | none       |
| CEP250   | 0.378  | 0.4211  | 1.7739 | 0.10755 | 0.232 | -5.1  | 0.18069 | none       |
| SLPI     | -0.213 | -0.1422 | -1.774 | 0.10756 | 0.232 | -5.1  | 1.24897 | none       |
| RHBDF1   | -0.226 | -0.1569 | -1.774 | 0.10761 | 0.232 | -5.1  | 0.17075 | none       |
| XKR8     | 0.266  | 0.1241  | 1.773  | 0.10771 | 0.232 | -5.1  | -0.7451 | none       |
| PSD      | 0.211  | 0.1377  | 1.773  | 0.10772 | 0.232 | -5.1  | 1.36275 | none       |
| OTX1     | -0.161 | -0.1412 | -1.773 | 0.10774 | 0.232 | -5.1  | -0.1018 | none       |
| TGFBRAP1 | 0.319  | 0.3704  | 1.7727 | 0.10776 | 0.232 | -5.11 | -0.2057 | none       |
| HRAS     | 0.155  | 0.1501  | 1.7726 | 0.10779 | 0.232 | -5.11 | -0.2508 | none       |
| NACC1    | -0.332 | -0.2081 | -1.772 | 0.10781 | 0.232 | -5.11 | 1.39217 | none       |
| TIMM10   | -0.309 | -0.3294 | -1.772 | 0.10797 | 0.233 | -5.11 | 1.01645 | none       |
| IL10RA   | 0.365  | 0.3311  | 1.7715 | 0.10797 | 0.233 | -5.11 | -0.1904 | none       |

|          |        |         |        |         |       |       |         |            |
|----------|--------|---------|--------|---------|-------|-------|---------|------------|
| TEX264   | -0.288 | -0.2701 | -1.771 | 0.10798 | 0.233 | -5.11 | 1.7018  | none       |
| MRPS33   | 0.25   | 0.0842  | 1.7714 | 0.10798 | 0.233 | -5.11 | -0.8738 | none       |
| UROD     | -0.229 | -0.1933 | -1.771 | 0.108   | 0.233 | -5.11 | 2.21448 | AA-related |
| MB       | 0.549  | 0.4659  | 1.7711 | 0.10805 | 0.233 | -5.11 | -0.292  | none       |
| PRKCB    | 0.34   | 0.3885  | 1.771  | 0.10805 | 0.233 | -5.11 | 0.72747 | none       |
| PLCD1    | 0.338  | 0.2606  | 1.7709 | 0.10807 | 0.233 | -5.11 | -0.7285 | none       |
| RNASE7   | -0.242 | -0.2037 | -1.771 | 0.10814 | 0.233 | -5.11 | 1.25473 | none       |
| MGAT1    | -0.209 | -0.2122 | -1.77  | 0.10823 | 0.233 | -5.11 | 1.97408 | none       |
| PIK3R5   | 0.415  | 0.4128  | 1.7697 | 0.10828 | 0.233 | -5.11 | 0.19409 | none       |
| BAG3     | 0.351  | 0.411   | 1.7694 | 0.10833 | 0.233 | -5.11 | -0.2634 | none       |
| PIP5K1B  | 0.173  | 0.1383  | 1.7692 | 0.10836 | 0.233 | -5.11 | -0.3791 | none       |
| LY9      | 0.305  | 0.133   | 1.7692 | 0.10838 | 0.233 | -5.11 | -0.7295 | none       |
| DRAM2    | -0.335 | -0.3532 | -1.768 | 0.1085  | 0.234 | -5.11 | 1.21324 | none       |
| FLNB     | 0.576  | 0.5772  | 1.7679 | 0.1086  | 0.234 | -5.11 | -0.3986 | none       |
| HIBCH    | 0.168  | 0.0987  | 1.7678 | 0.10862 | 0.234 | -5.11 | 0.53997 | none       |
| PARBP    | 0.296  | 0.1905  | 1.7677 | 0.10864 | 0.234 | -5.11 | -0.49   | none       |
| RPL41    | -0.341 | -0.3877 | -1.767 | 0.10872 | 0.234 | -5.11 | 2.1759  | AA-related |
| CTBP1    | 0.22   | 0.2786  | 1.7672 | 0.10873 | 0.234 | -5.11 | -0.195  | none       |
| ERP27    | 0.328  | 0.2715  | 1.7671 | 0.10874 | 0.234 | -5.11 | -0.8554 | none       |
| YPEL5    | -0.242 | -0.2677 | -1.767 | 0.10875 | 0.234 | -5.11 | 1.77329 | none       |
| TNFRSF12 | 0.386  | 0.3273  | 1.7666 | 0.10882 | 0.234 | -5.11 | -0.1531 | none       |
| TMEM86B  | 0.339  | 0.3377  | 1.7665 | 0.10883 | 0.234 | -5.11 | -0.9608 | none       |
| HCFC1    | 0.532  | 0.6722  | 1.7662 | 0.1089  | 0.234 | -5.11 | -0.0993 | none       |
| KCTD15   | -0.243 | -0.1581 | -1.766 | 0.10891 | 0.234 | -5.11 | 1.19645 | none       |
| SPON1    | -0.181 | -0.1439 | -1.766 | 0.10893 | 0.234 | -5.11 | 0.17318 | none       |
| CMPK1    | -0.186 | -0.2143 | -1.766 | 0.10896 | 0.234 | -5.12 | 1.99098 | none       |
| SNRPG    | -0.292 | -0.3149 | -1.766 | 0.10901 | 0.234 | -5.12 | 0.94955 | none       |
| IL23R    | 0.322  | 0.2673  | 1.7652 | 0.10907 | 0.234 | -5.12 | -0.6349 | none       |
| PTPRO    | -0.175 | -0.1556 | -1.765 | 0.10909 | 0.234 | -5.12 | 1.92345 | none       |
| PSTK     | 0.311  | 0.2629  | 1.7651 | 0.10909 | 0.234 | -5.12 | -0.8415 | none       |
| CHCHD7   | -0.261 | -0.2958 | -1.765 | 0.10912 | 0.234 | -5.12 | 1.08775 | none       |
| CCL14    | -0.183 | -0.1292 | -1.764 | 0.10926 | 0.235 | -5.12 | 0.72952 | none       |
| PGAP3    | 0.221  | 0.186   | 1.7634 | 0.10938 | 0.235 | -5.12 | 1.01615 | none       |
| FAM229A  | -0.266 | -0.2148 | -1.763 | 0.10938 | 0.235 | -5.12 | 0.70377 | none       |
| VRTN     | -0.17  | -0.1291 | -1.763 | 0.10952 | 0.235 | -5.12 | 0.2379  | none       |
| NAT9     | 0.258  | 0.2287  | 1.7623 | 0.10959 | 0.235 | -5.12 | -0.272  | none       |
| PBK      | -0.332 | -0.311  | -1.762 | 0.10961 | 0.235 | -5.12 | 2.06613 | none       |
| STX11    | 0.134  | 0.1344  | 1.7621 | 0.10962 | 0.235 | -5.12 | 0.40145 | none       |
| BCL9L    | 0.546  | 0.6091  | 1.762  | 0.10963 | 0.235 | -5.12 | -0.5194 | none       |
| KIF14    | 0.475  | 0.5296  | 1.7613 | 0.10976 | 0.235 | -5.12 | -0.1056 | none       |



|          |        |         |        |         |       |       |         |            |
|----------|--------|---------|--------|---------|-------|-------|---------|------------|
| FBXO11   | 0.465  | 0.4529  | 1.7607 | 0.10986 | 0.236 | -5.12 | -0.7017 | none       |
| ECSCR    | -0.248 | -0.2495 | -1.761 | 0.10989 | 0.236 | -5.12 | -0.561  | none       |
| IVNS1ABP | 0.126  | 0.1182  | 1.7603 | 0.10993 | 0.236 | -5.12 | 0.30383 | none       |
| KRBA1    | 0.264  | 0.3149  | 1.7597 | 0.11003 | 0.236 | -5.12 | 0.33906 | none       |
| CFH      | 0.287  | 0.1817  | 1.7595 | 0.11007 | 0.236 | -5.12 | -0.832  | none       |
| TRIM62   | 0.39   | 0.3019  | 1.7593 | 0.11011 | 0.236 | -5.12 | -0.4767 | none       |
| MAP7     | 0.356  | 0.457   | 1.7592 | 0.11013 | 0.236 | -5.12 | -0.2268 | none       |
| AASS     | 0.29   | 0.2571  | 1.7585 | 0.11024 | 0.236 | -5.13 | -1.0893 | none       |
| AGTPBP1  | 0.269  | 0.2552  | 1.7585 | 0.11025 | 0.236 | -5.13 | 0.63401 | none       |
| PRDM4    | 0.305  | 0.3673  | 1.7579 | 0.11035 | 0.236 | -5.13 | 0.59274 | none       |
| SLC28A3  | -0.253 | -0.1552 | -1.758 | 0.11037 | 0.236 | -5.13 | 0.5414  | none       |
| ZNF280B  | 0.207  | 0.173   | 1.7575 | 0.11043 | 0.237 | -5.13 | 0.15294 | none       |
| 5-Mar    | -0.571 | -0.4693 | -1.757 | 0.11045 | 0.237 | -5.13 | 2.20606 | AA-related |
| JMJD1C   | 0.487  | 0.5668  | 1.7573 | 0.11046 | 0.237 | -5.13 | -0.2005 | none       |
| TOMM7    | -0.343 | -0.3805 | -1.757 | 0.1105  | 0.237 | -5.13 | 0.73533 | none       |
| SPTBN4   | 0.201  | 0.1806  | 1.7569 | 0.11052 | 0.237 | -5.13 | -0.6729 | none       |
| SLC6A12  | 0.272  | 0.221   | 1.7567 | 0.11057 | 0.237 | -5.13 | 0.05647 | none       |
| MUL1     | -0.184 | -0.1674 | -1.757 | 0.11057 | 0.237 | -5.13 | 1.11437 | none       |
| PPP1R35  | -0.436 | -0.4337 | -1.756 | 0.11065 | 0.237 | -5.13 | 0.98412 | none       |
| IL13     | -0.291 | -0.2104 | -1.756 | 0.11065 | 0.237 | -5.13 | 0.85546 | none       |
| COPB1    | 0.187  | 0.0785  | 1.756  | 0.11069 | 0.237 | -5.13 | 0.9123  | none       |
| GINM1    | 0.204  | 0.0959  | 1.7559 | 0.11071 | 0.237 | -5.13 | -0.6817 | none       |
| DNAH2    | 0.243  | 0.1432  | 1.7555 | 0.11077 | 0.237 | -5.13 | -1.0823 | none       |
| BPGM     | -0.182 | -0.2047 | -1.755 | 0.11079 | 0.237 | -5.13 | 0.32611 | none       |
| ANO8     | -0.148 | -0.0938 | -1.755 | 0.11081 | 0.237 | -5.13 | -0.1456 | none       |
| SLC22A8  | 0.164  | 0.1644  | 1.7551 | 0.11086 | 0.237 | -5.13 | 1.02679 | none       |
| ADGRE5   | 0.342  | 0.2721  | 1.7549 | 0.11088 | 0.237 | -5.13 | -0.6744 | none       |
| ARG2     | -0.35  | -0.2743 | -1.755 | 0.11093 | 0.237 | -5.13 | 2.1524  | AA-related |
| STYXL1   | -0.163 | -0.2269 | -1.755 | 0.11095 | 0.237 | -5.13 | 0.18904 | none       |
| THUMPD1  | 0.315  | 0.3089  | 1.7544 | 0.11099 | 0.237 | -5.13 | -0.416  | none       |
| MTFP1    | -0.231 | -0.1838 | -1.754 | 0.11099 | 0.237 | -5.13 | 1.64871 | none       |
| RPL26L1  | 0.218  | 0.0669  | 1.7542 | 0.11102 | 0.237 | -5.13 | -0.2342 | none       |
| MRPL37   | -0.245 | -0.2083 | -1.754 | 0.11106 | 0.237 | -5.13 | 0.90883 | none       |
| SPEG     | 0.157  | 0.0634  | 1.7539 | 0.11107 | 0.237 | -5.13 | -0.4519 | none       |
| SHD      | 0.296  | 0.231   | 1.7537 | 0.1111  | 0.237 | -5.13 | 0.40111 | none       |
| B4GALT5  | 0.166  | 0.1466  | 1.7522 | 0.11137 | 0.238 | -5.13 | -0.9673 | none       |
| ITGAV    | 0.301  | 0.385   | 1.7522 | 0.11138 | 0.238 | -5.13 | -0.5518 | none       |
| RRN3     | 0.173  | 0.1452  | 1.7521 | 0.11139 | 0.238 | -5.13 | -0.2947 | none       |
| STX17    | 0.237  | 0.1915  | 1.7514 | 0.11152 | 0.238 | -5.14 | 1.01099 | none       |
| WDHD1    | 0.389  | 0.4047  | 1.7512 | 0.11155 | 0.238 | -5.14 | -0.0838 | none       |

|          |        |         |        |         |       |       |         |            |
|----------|--------|---------|--------|---------|-------|-------|---------|------------|
| YES1     | 0.34   | 0.2982  | 1.7511 | 0.11156 | 0.238 | -5.14 | 0.18293 | none       |
| ZFC3H1   | 0.439  | 0.4797  | 1.751  | 0.11159 | 0.238 | -5.14 | -0.5919 | none       |
| HMX1     | -0.164 | -0.1261 | -1.751 | 0.11166 | 0.238 | -5.14 | 1.20213 | none       |
| KATNAL1  | 0.142  | 0.0713  | 1.7501 | 0.11174 | 0.238 | -5.14 | -0.2733 | none       |
| GSTK1    | -0.225 | -0.2346 | -1.75  | 0.11175 | 0.238 | -5.14 | 1.06192 | none       |
| ZDHHC22  | -0.165 | -0.1508 | -1.75  | 0.11179 | 0.238 | -5.14 | 1.36672 | none       |
| INTS5    | -0.301 | -0.3051 | -1.75  | 0.11179 | 0.238 | -5.14 | 2.1559  | AA-related |
| CYP4F22  | -0.124 | -0.0905 | -1.75  | 0.11183 | 0.238 | -5.14 | 1.65279 | none       |
| CCDC6    | 0.372  | 0.3759  | 1.7496 | 0.11184 | 0.238 | -5.14 | -0.0792 | none       |
| MED12    | 0.346  | 0.3781  | 1.7495 | 0.11186 | 0.238 | -5.14 | -0.5182 | none       |
| PITPNM1  | 0.364  | 0.4214  | 1.7492 | 0.1119  | 0.238 | -5.14 | -0.729  | none       |
| PRDM10   | 0.274  | 0.2934  | 1.749  | 0.11194 | 0.239 | -5.14 | 0.15396 | none       |
| RELL2    | 0.199  | 0.2157  | 1.7488 | 0.11197 | 0.239 | -5.14 | 0.30135 | none       |
| MT1X     | -0.377 | -0.3739 | -1.749 | 0.11203 | 0.239 | -5.14 | 2.28873 | AA-related |
| PPP1R9A  | 0.14   | 0.1155  | 1.7484 | 0.11205 | 0.239 | -5.14 | -1.4172 | none       |
| GPA33    | 0.29   | 0.1499  | 1.7483 | 0.11206 | 0.239 | -5.14 | 1.04376 | none       |
| BTK      | -0.315 | -0.1952 | -1.748 | 0.11206 | 0.239 | -5.14 | 0.77171 | none       |
| DPY30    | -0.254 | -0.2949 | -1.748 | 0.11212 | 0.239 | -5.14 | 1.31371 | none       |
| DDA1     | -0.221 | -0.1732 | -1.748 | 0.11213 | 0.239 | -5.14 | 0.65841 | none       |
| TCERG1   | 0.541  | 0.6372  | 1.7479 | 0.11214 | 0.239 | -5.14 | 0.14584 | none       |
| ASXL2    | 0.539  | 0.5781  | 1.7479 | 0.11214 | 0.239 | -5.14 | -0.4851 | none       |
| SLC25A26 | 0.228  | 0.1026  | 1.7478 | 0.11217 | 0.239 | -5.14 | -0.2307 | none       |
| BLVRA    | -0.264 | -0.2241 | -1.747 | 0.11222 | 0.239 | -5.14 | 1.96939 | none       |
| DDR1     | 0.376  | 0.3256  | 1.7474 | 0.11223 | 0.239 | -5.14 | -0.3436 | none       |
| POLR2L   | -0.234 | -0.2269 | -1.747 | 0.11228 | 0.239 | -5.14 | 0.68096 | none       |
| ATXN2L   | 0.406  | 0.4462  | 1.747  | 0.11231 | 0.239 | -5.14 | -0.4838 | none       |
| BCDIN3D  | 0.24   | 0.1519  | 1.7466 | 0.11238 | 0.239 | -5.14 | -0.098  | none       |
| DCST2    | -0.159 | -0.1039 | -1.746 | 0.11241 | 0.239 | -5.14 | 1.97408 | none       |
| ANKRD1   | -0.119 | -0.0834 | -1.746 | 0.11242 | 0.239 | -5.14 | 0.81131 | none       |
| FAM72D   | -0.372 | -0.2358 | -1.746 | 0.11246 | 0.239 | -5.14 | 0.53665 | none       |
| KMT5A    | 0.352  | 0.4289  | 1.7461 | 0.11246 | 0.239 | -5.14 | -0.3667 | none       |
| SNAPC5   | 0.205  | 0.1166  | 1.746  | 0.11248 | 0.239 | -5.14 | -0.294  | none       |
| POLR3K   | 0.21   | 0.1127  | 1.7456 | 0.11255 | 0.239 | -5.14 | -0.9709 | none       |
| CDCA5    | -0.163 | -0.1214 | -1.746 | 0.11257 | 0.239 | -5.14 | 2.08448 | none       |
| UTP6     | 0.137  | 0.0795  | 1.7454 | 0.11258 | 0.239 | -5.14 | 0.60106 | none       |
| MRPL28   | -0.199 | -0.1637 | -1.745 | 0.11265 | 0.239 | -5.14 | 1.34256 | none       |
| CLEC18C  | -0.214 | -0.1323 | -1.744 | 0.11279 | 0.24  | -5.15 | -0.1931 | none       |
| PACRGL   | 0.511  | 0.3789  | 1.7443 | 0.1128  | 0.24  | -5.15 | 0.15433 | none       |
| IL3      | 0.321  | 0.4617  | 1.7441 | 0.11283 | 0.24  | -5.15 | 0.63795 | none       |
| ANKRD28  | 0.447  | 0.4811  | 1.744  | 0.11284 | 0.24  | -5.15 | 0.40238 | none       |

|           |        |         |        |         |       |       |         |      |
|-----------|--------|---------|--------|---------|-------|-------|---------|------|
| PRKACB    | -0.225 | -0.248  | -1.744 | 0.11286 | 0.24  | -5.15 | 1.28377 | none |
| RELB      | 0.207  | 0.1914  | 1.7435 | 0.11293 | 0.24  | -5.15 | 0.04734 | none |
| ETV6      | 0.352  | 0.3654  | 1.743  | 0.11303 | 0.24  | -5.15 | -1.0489 | none |
| COL20A1   | 0.187  | 0.1637  | 1.7427 | 0.11308 | 0.24  | -5.15 | 0.68625 | none |
| RAX       | -0.183 | -0.1686 | -1.743 | 0.11311 | 0.24  | -5.15 | 1.31308 | none |
| VPS13C    | 0.361  | 0.3108  | 1.7423 | 0.11315 | 0.24  | -5.15 | -0.7409 | none |
| SF3B4     | 0.168  | 0.1871  | 1.7419 | 0.11322 | 0.24  | -5.15 | 0.33597 | none |
| NIT2      | -0.222 | -0.218  | -1.742 | 0.11323 | 0.24  | -5.15 | 1.2059  | none |
| SPATA13   | 0.339  | 0.3538  | 1.7416 | 0.11327 | 0.24  | -5.15 | -0.645  | none |
| STIP1     | 0.507  | 0.5694  | 1.7415 | 0.11329 | 0.24  | -5.15 | -0.4568 | none |
| ASRGL1    | 0.33   | 0.2809  | 1.7415 | 0.1133  | 0.24  | -5.15 | -0.1542 | none |
| NDUFS2    | -0.152 | -0.1488 | -1.741 | 0.11343 | 0.24  | -5.15 | 1.24691 | none |
| TMEM18    | -0.234 | -0.2313 | -1.74  | 0.11362 | 0.241 | -5.15 | 1.88612 | none |
| ZNF700    | 0.3    | 0.269   | 1.7395 | 0.11366 | 0.241 | -5.15 | -0.0884 | none |
| ZFP62     | 0.322  | 0.3084  | 1.7393 | 0.11369 | 0.241 | -5.15 | 0.93931 | none |
| COLQ      | 0.213  | 0.1787  | 1.7393 | 0.1137  | 0.241 | -5.15 | -0.1192 | none |
| AC233755  | -0.516 | -0.4828 | -1.739 | 0.11373 | 0.241 | -5.15 | 0.83202 | none |
| KSR2      | 0.127  | 0.1107  | 1.7386 | 0.11383 | 0.241 | -5.15 | -1.2832 | none |
| SPATC1    | 0.169  | 0.1298  | 1.7379 | 0.11394 | 0.241 | -5.15 | -0.1969 | none |
| FAM186B   | -0.137 | -0.0736 | -1.738 | 0.11398 | 0.241 | -5.16 | 0.87241 | none |
| CBLN3     | -0.184 | -0.0662 | -1.738 | 0.114   | 0.241 | -5.16 | 0.27652 | none |
| SOS2      | 0.252  | 0.2215  | 1.7373 | 0.11406 | 0.242 | -5.16 | -0.4368 | none |
| PYCR1     | 0.163  | 0.1385  | 1.7369 | 0.11414 | 0.242 | -5.16 | -0.0901 | none |
| GPR35     | 0.251  | 0.2531  | 1.7356 | 0.11437 | 0.242 | -5.16 | -0.2066 | none |
| GCHFR     | -0.304 | -0.2818 | -1.735 | 0.11441 | 0.242 | -5.16 | 0.7918  | none |
| SS18L1    | 0.25   | 0.3187  | 1.7354 | 0.11441 | 0.242 | -5.16 | -0.4137 | none |
| LTBP3     | 0.366  | 0.296   | 1.7352 | 0.11444 | 0.242 | -5.16 | -0.8274 | none |
| KIF5C     | 0.229  | 0.2752  | 1.735  | 0.11448 | 0.242 | -5.16 | -0.0953 | none |
| NKAPL     | 0.149  | 0.1207  | 1.735  | 0.11448 | 0.242 | -5.16 | -0.6686 | none |
| TRIM38    | 0.286  | 0.2682  | 1.7348 | 0.11452 | 0.242 | -5.16 | -0.9075 | none |
| OVOL3     | -0.201 | -0.1472 | -1.734 | 0.11464 | 0.242 | -5.16 | 1.67977 | none |
| UBE2N     | -0.269 | -0.2883 | -1.734 | 0.11467 | 0.242 | -5.16 | 1.05874 | none |
| BMP4      | 0.205  | 0.1358  | 1.734  | 0.11467 | 0.242 | -5.16 | -0.2226 | none |
| PRX       | 0.225  | 0.1998  | 1.7337 | 0.11473 | 0.243 | -5.16 | -0.1444 | none |
| DDO       | -0.13  | -0.0877 | -1.734 | 0.11474 | 0.243 | -5.16 | 0.45659 | none |
| COMMD7    | -0.22  | -0.1986 | -1.733 | 0.11486 | 0.243 | -5.16 | 1.24719 | none |
| NCBP2-AS1 | 0.208  | 0.1602  | 1.7328 | 0.11488 | 0.243 | -5.16 | -0.475  | none |
| MYO1H     | 0.234  | 0.2884  | 1.7325 | 0.11494 | 0.243 | -5.16 | 0.64996 | none |
| TMEM71    | 0.347  | 0.2039  | 1.7324 | 0.11496 | 0.243 | -5.16 | -0.832  | none |
| NPAS2     | 0.3    | 0.2291  | 1.7324 | 0.11496 | 0.243 | -5.16 | -0.9638 | none |

|          |        |         |        |         |       |       |         |            |
|----------|--------|---------|--------|---------|-------|-------|---------|------------|
| NPIPA7   | 0.806  | 0.6313  | 1.7323 | 0.11497 | 0.243 | -5.16 | -0.1604 | none       |
| ARHGAP1C | 0.243  | 0.2894  | 1.732  | 0.11503 | 0.243 | -5.16 | 0.29802 | none       |
| IFT81    | 0.422  | 0.3101  | 1.7318 | 0.11507 | 0.243 | -5.16 | -0.7412 | none       |
| RPS18    | -0.335 | -0.3786 | -1.732 | 0.11507 | 0.243 | -5.16 | 1.92288 | none       |
| COX15    | 0.177  | 0.1125  | 1.7317 | 0.11509 | 0.243 | -5.16 | -0.7192 | none       |
| INS      | -0.196 | -0.1304 | -1.732 | 0.1151  | 0.243 | -5.16 | -0.0086 | none       |
| C17ORF49 | -0.267 | -0.2568 | -1.732 | 0.11511 | 0.243 | -5.16 | 1.70626 | none       |
| VPS13A   | 0.588  | 0.5863  | 1.7307 | 0.11527 | 0.243 | -5.17 | -0.8485 | none       |
| PDE6B    | 0.317  | 0.2006  | 1.7306 | 0.11528 | 0.243 | -5.17 | 0.60921 | none       |
| MTMR9    | 0.149  | 0.1242  | 1.7303 | 0.11534 | 0.243 | -5.17 | 0.12676 | none       |
| HAPLN1   | 0.439  | 0.2825  | 1.7302 | 0.11537 | 0.243 | -5.17 | -0.8921 | none       |
| CDK6     | 0.163  | 0.1849  | 1.73   | 0.11541 | 0.243 | -5.17 | 0.79354 | none       |
| SLC2A7   | -0.127 | -0.1092 | -1.73  | 0.11545 | 0.244 | -5.17 | 2.3646  | AA-related |
| HNRNPA0  | -0.15  | -0.1422 | -1.729 | 0.11549 | 0.244 | -5.17 | 1.27637 | none       |
| RBL1     | 0.311  | 0.3279  | 1.7294 | 0.11552 | 0.244 | -5.17 | -0.0802 | none       |
| CRB3     | -0.275 | -0.1633 | -1.729 | 0.11553 | 0.244 | -5.17 | 1.75797 | none       |
| OPTN     | 0.427  | 0.4459  | 1.7292 | 0.11555 | 0.244 | -5.17 | -0.3807 | none       |
| HK2      | 0.383  | 0.4763  | 1.7283 | 0.11571 | 0.244 | -5.17 | 0.3627  | none       |
| PLOD2    | 0.161  | 0.1495  | 1.7281 | 0.11575 | 0.244 | -5.17 | -0.1163 | none       |
| TEN1-CDK | 0.287  | 0.2518  | 1.7279 | 0.11579 | 0.244 | -5.17 | -0.6774 | none       |
| CNIH4    | -0.349 | -0.4019 | -1.728 | 0.11581 | 0.244 | -5.17 | 0.95088 | none       |
| UBALD2   | -0.414 | -0.3557 | -1.728 | 0.11583 | 0.244 | -5.17 | 1.47827 | none       |
| ANAPC15  | 0.132  | 0.1069  | 1.7273 | 0.1159  | 0.244 | -5.17 | -0.1272 | none       |
| MAGIX    | 0.339  | 0.2155  | 1.7272 | 0.11592 | 0.244 | -5.17 | -0.4802 | none       |
| CCHCR1   | 0.228  | 0.1823  | 1.7271 | 0.11593 | 0.244 | -5.17 | -0.4545 | none       |
| SPAG5    | 0.564  | 0.6495  | 1.7267 | 0.11601 | 0.244 | -5.17 | -0.4638 | none       |
| ABO      | 0.255  | 0.2195  | 1.7265 | 0.11605 | 0.244 | -5.17 | -0.7861 | none       |
| USP8     | 0.617  | 0.6032  | 1.7264 | 0.11606 | 0.244 | -5.17 | -0.3935 | none       |
| ANKRD36  | 0.298  | 0.1441  | 1.7261 | 0.11612 | 0.244 | -5.17 | -0.5754 | none       |
| POLRMT   | -0.305 | -0.1352 | -1.726 | 0.11613 | 0.244 | -5.17 | 1.09007 | none       |
| OTP      | 0.135  | 0.1363  | 1.7252 | 0.11629 | 0.245 | -5.17 | 0.96251 | none       |
| GOLGA6B  | 0.358  | 0.2276  | 1.7251 | 0.1163  | 0.245 | -5.17 | -0.3459 | none       |
| PCK2     | 0.148  | 0.1028  | 1.7243 | 0.11646 | 0.245 | -5.17 | -0.3886 | none       |
| PSG1     | 0.184  | 0.2087  | 1.724  | 0.11651 | 0.245 | -5.17 | -0.4702 | none       |
| CTPS1    | 0.124  | 0.1104  | 1.724  | 0.11652 | 0.245 | -5.17 | 0.04143 | none       |
| PPA2     | -0.183 | -0.2228 | -1.723 | 0.11661 | 0.245 | -5.18 | 1.1201  | none       |
| TMEM43   | 0.198  | 0.1998  | 1.7234 | 0.11662 | 0.245 | -5.18 | 0.14946 | none       |
| IP6K1    | -0.224 | -0.1896 | -1.723 | 0.11665 | 0.245 | -5.18 | 1.58736 | none       |
| HIST2H2A | -0.593 | -0.6505 | -1.723 | 0.11678 | 0.246 | -5.18 | 0.65201 | none       |
| PDCD10   | -0.22  | -0.2339 | -1.722 | 0.11685 | 0.246 | -5.18 | 1.1103  | none       |

|          |        |         |        |         |       |       |         |            |
|----------|--------|---------|--------|---------|-------|-------|---------|------------|
| IL1RN    | -0.308 | -0.2444 | -1.722 | 0.11692 | 0.246 | -5.18 | 1.36114 | none       |
| PEX3     | -0.224 | -0.1892 | -1.722 | 0.11693 | 0.246 | -5.18 | 1.10138 | none       |
| SNAP23   | 0.246  | 0.0907  | 1.7217 | 0.11694 | 0.246 | -5.18 | 0.24469 | none       |
| ALOX15B  | 0.242  | 0.1593  | 1.7217 | 0.11694 | 0.246 | -5.18 | -1.0055 | none       |
| LMNB1    | 0.418  | 0.5126  | 1.7217 | 0.11694 | 0.246 | -5.18 | 0.6444  | none       |
| USP46    | 0.37   | 0.1964  | 1.7214 | 0.11699 | 0.246 | -5.18 | -0.9955 | none       |
| POGLUT1  | 0.176  | 0.169   | 1.7213 | 0.11702 | 0.246 | -5.18 | -0.7126 | none       |
| PXDC1    | -0.169 | -0.1669 | -1.721 | 0.11709 | 0.246 | -5.18 | 0.02749 | none       |
| CTDSPL   | 0.605  | 0.4101  | 1.7204 | 0.11718 | 0.246 | -5.18 | -0.2419 | none       |
| MRPL27   | -0.208 | -0.1959 | -1.72  | 0.11721 | 0.246 | -5.18 | 0.83386 | none       |
| ANKRD61  | 0.128  | 0.1443  | 1.7199 | 0.11728 | 0.246 | -5.18 | -0.1234 | none       |
| CRIP2    | -0.295 | -0.1946 | -1.72  | 0.11732 | 0.246 | -5.18 | 1.8286  | none       |
| CCNH     | -0.215 | -0.216  | -1.72  | 0.11732 | 0.246 | -5.18 | 2.08239 | none       |
| ARHGDI1  | 0.189  | 0.2081  | 1.7195 | 0.11735 | 0.246 | -5.18 | 0.99908 | none       |
| GPRC5B   | -0.176 | -0.1468 | -1.72  | 0.11735 | 0.246 | -5.18 | 1.58652 | none       |
| PRKAA2   | 0.122  | 0.0824  | 1.7192 | 0.1174  | 0.246 | -5.18 | -1.2447 | none       |
| SSX7     | 0.199  | 0.1158  | 1.7174 | 0.11774 | 0.247 | -5.18 | -1.0749 | none       |
| SYN3     | 0.408  | 0.34    | 1.7168 | 0.11787 | 0.247 | -5.19 | -0.5525 | none       |
| CBY3     | 0.145  | 0.1452  | 1.7166 | 0.11789 | 0.247 | -5.19 | -0.3557 | none       |
| MDK      | -0.158 | -0.102  | -1.717 | 0.1179  | 0.247 | -5.19 | -0.1812 | none       |
| PSMD11   | -0.159 | -0.0865 | -1.716 | 0.11796 | 0.247 | -5.19 | 0.36268 | none       |
| KIF17    | 0.325  | 0.2418  | 1.7161 | 0.11799 | 0.247 | -5.19 | 0.21639 | none       |
| C18ORF54 | 0.233  | 0.2531  | 1.716  | 0.11801 | 0.247 | -5.19 | 0.47363 | none       |
| DCTN2    | 0.211  | 0.1628  | 1.7156 | 0.11809 | 0.248 | -5.19 | 0.61924 | none       |
| GHRHR    | 0.244  | 0.2376  | 1.7155 | 0.11811 | 0.248 | -5.19 | -0.5038 | none       |
| MYPOP    | 0.149  | 0.1764  | 1.7153 | 0.11813 | 0.248 | -5.19 | 0.13752 | none       |
| HSD3B7   | 0.235  | 0.1572  | 1.7151 | 0.11818 | 0.248 | -5.19 | -0.2512 | none       |
| LTBP2    | -0.171 | -0.1538 | -1.715 | 0.11821 | 0.248 | -5.19 | 1.0703  | none       |
| MIA      | 0.464  | 0.382   | 1.7147 | 0.11826 | 0.248 | -5.19 | -1.0047 | none       |
| PSG6     | -0.168 | -0.0989 | -1.714 | 0.1183  | 0.248 | -5.19 | 2.19802 | AA-related |
| NECAP2   | -0.189 | -0.2034 | -1.714 | 0.1184  | 0.248 | -5.19 | 1.14324 | none       |
| SLC4A10  | -0.183 | -0.0962 | -1.714 | 0.11846 | 0.248 | -5.19 | 2.36738 | AA-related |
| ZNF335   | 0.369  | 0.4417  | 1.7129 | 0.1186  | 0.248 | -5.19 | -0.6581 | none       |
| JUNB     | -0.108 | -0.0499 | -1.713 | 0.1186  | 0.248 | -5.19 | 1.57848 | none       |
| ARHGAP11 | 0.238  | 0.2009  | 1.7128 | 0.11862 | 0.248 | -5.19 | 1.20964 | none       |
| PRDM1    | 0.381  | 0.4341  | 1.7127 | 0.11863 | 0.248 | -5.19 | -0.7132 | none       |
| TFB2M    | -0.331 | -0.3053 | -1.712 | 0.11867 | 0.248 | -5.19 | 1.79267 | none       |
| NFYC     | 0.243  | 0.1908  | 1.7124 | 0.11868 | 0.248 | -5.19 | -0.7654 | none       |
| PHF14    | 0.476  | 0.4749  | 1.7119 | 0.11878 | 0.248 | -5.19 | 0.08977 | none       |
| SERTAD1  | -0.221 | -0.1924 | -1.712 | 0.11881 | 0.249 | -5.19 | 1.23729 | none       |

|          |        |         |        |         |       |       |         |            |
|----------|--------|---------|--------|---------|-------|-------|---------|------------|
| NCAPD2   | 0.444  | 0.4901  | 1.7117 | 0.11882 | 0.249 | -5.19 | -0.3695 | none       |
| P2RY10   | -0.252 | -0.2905 | -1.712 | 0.11885 | 0.249 | -5.19 | 2.11196 | AA-related |
| UBL7     | -0.203 | -0.1922 | -1.711 | 0.1189  | 0.249 | -5.19 | 1.8725  | none       |
| FBXO22   | 0.299  | 0.089   | 1.7112 | 0.11892 | 0.249 | -5.19 | -0.5795 | none       |
| ADPRM    | 0.262  | 0.0799  | 1.7108 | 0.11899 | 0.249 | -5.19 | 0.68775 | none       |
| DDX27    | 0.492  | 0.6103  | 1.7107 | 0.11901 | 0.249 | -5.19 | -0.4555 | none       |
| CLHC1    | 0.323  | 0.2509  | 1.7103 | 0.11909 | 0.249 | -5.19 | -0.6383 | none       |
| TINAGL1  | 0.246  | 0.1969  | 1.71   | 0.11915 | 0.249 | -5.19 | -0.9571 | none       |
| SATB1    | 0.32   | 0.3474  | 1.7098 | 0.11918 | 0.249 | -5.19 | -0.0431 | none       |
| RPS26    | -0.339 | -0.3601 | -1.709 | 0.11927 | 0.249 | -5.2  | 1.99767 | none       |
| HPGD     | 0.175  | 0.0276  | 1.7092 | 0.1193  | 0.249 | -5.2  | 0.84064 | none       |
| DAZAP2   | -0.213 | -0.2541 | -1.709 | 0.11943 | 0.249 | -5.2  | 0.60293 | none       |
| ADAMTSL4 | 0.212  | 0.1757  | 1.7084 | 0.11944 | 0.249 | -5.2  | -0.8315 | none       |
| FOXR1    | -0.209 | -0.1759 | -1.708 | 0.11945 | 0.249 | -5.2  | 0.89101 | none       |
| CXCL8    | -0.559 | -0.4937 | -1.708 | 0.11953 | 0.25  | -5.2  | 0.99565 | none       |
| FIBCD1   | 0.23   | 0.1869  | 1.7079 | 0.11954 | 0.25  | -5.2  | -0.1852 | none       |
| CSK      | -0.198 | -0.1205 | -1.708 | 0.11962 | 0.25  | -5.2  | 1.67592 | none       |
| PRIM2    | 0.368  | 0.2028  | 1.7069 | 0.11973 | 0.25  | -5.2  | -0.2909 | none       |
| HNRNPUL1 | 0.652  | 0.7313  | 1.706  | 0.1199  | 0.25  | -5.2  | 0.03093 | none       |
| ATF4     | -0.175 | -0.0758 | -1.706 | 0.11995 | 0.25  | -5.2  | 1.52463 | none       |
| LCA5     | 0.156  | 0.1039  | 1.7055 | 0.12    | 0.25  | -5.2  | -0.9755 | none       |
| MRPL49   | 0.253  | 0.1558  | 1.7045 | 0.1202  | 0.251 | -5.2  | -1.1534 | none       |
| ZFP91    | 0.231  | 0.2437  | 1.7043 | 0.12024 | 0.251 | -5.2  | 0.22324 | none       |
| SNX5     | 0.165  | 0.1481  | 1.7042 | 0.12025 | 0.251 | -5.2  | -0.9376 | none       |
| COQ2     | 0.278  | 0.206   | 1.7042 | 0.12026 | 0.251 | -5.2  | 0.73775 | none       |
| USP11    | 0.254  | 0.2055  | 1.7041 | 0.12026 | 0.251 | -5.2  | 0.04538 | none       |
| ARHGAP11 | 0.486  | 0.5791  | 1.7039 | 0.12031 | 0.251 | -5.2  | 0.81292 | none       |
| DIS3     | 0.359  | 0.4135  | 1.7034 | 0.1204  | 0.251 | -5.2  | -0.0877 | none       |
| MLEC     | 0.358  | 0.3534  | 1.7033 | 0.12042 | 0.251 | -5.2  | 0.1328  | none       |
| C8ORF74  | 0.32   | 0.2408  | 1.7028 | 0.12051 | 0.251 | -5.2  | -0.7238 | none       |
| KIAA1671 | 0.276  | 0.256   | 1.7027 | 0.12054 | 0.251 | -5.2  | -0.384  | none       |
| GPR63    | 0.151  | 0.0969  | 1.7027 | 0.12054 | 0.251 | -5.2  | 0.24285 | none       |
| DUSP6    | -0.185 | -0.0599 | -1.702 | 0.12063 | 0.251 | -5.21 | 1.5779  | none       |
| CNIH2    | 0.369  | 0.3048  | 1.7021 | 0.12065 | 0.251 | -5.21 | -0.4575 | none       |
| NUDT16L1 | -0.224 | -0.2029 | -1.701 | 0.12083 | 0.252 | -5.21 | 2.0547  | none       |
| RNF122   | -0.142 | -0.1268 | -1.701 | 0.12084 | 0.252 | -5.21 | 1.22138 | none       |
| LRRC56   | 0.26   | 0.1423  | 1.7011 | 0.12084 | 0.252 | -5.21 | -1.0847 | none       |
| SMC1A    | 0.653  | 0.7491  | 1.7005 | 0.12095 | 0.252 | -5.21 | 0.21109 | none       |
| THBS3    | 0.278  | 0.2226  | 1.6999 | 0.12108 | 0.252 | -5.21 | -0.531  | none       |
| HIST1H4H | 0.178  | -0.0244 | 1.6996 | 0.12113 | 0.252 | -5.21 | -0.5885 | none       |

|          |        |         |        |         |       |       |         |            |
|----------|--------|---------|--------|---------|-------|-------|---------|------------|
| KIF12    | 0.187  | 0.152   | 1.6996 | 0.12114 | 0.252 | -5.21 | 0.72857 | none       |
| CHURC1   | -0.259 | -0.3237 | -1.699 | 0.12118 | 0.252 | -5.21 | 0.71614 | none       |
| PABPC1L  | 0.25   | 0.2615  | 1.6992 | 0.12122 | 0.252 | -5.21 | -0.6154 | none       |
| SEPHS1   | 0.255  | 0.2189  | 1.6987 | 0.12131 | 0.252 | -5.21 | -0.6453 | none       |
| EPX      | 0.144  | 0.1009  | 1.6985 | 0.12134 | 0.252 | -5.21 | -1.323  | none       |
| GM2A     | 0.142  | 0.0644  | 1.6984 | 0.12137 | 0.252 | -5.21 | -0.7036 | none       |
| ZNF460   | 0.225  | 0.1954  | 1.698  | 0.12144 | 0.253 | -5.21 | -0.7466 | none       |
| MRPS34   | -0.169 | -0.1103 | -1.698 | 0.12147 | 0.253 | -5.21 | 1.91033 | none       |
| NOC4L    | -0.155 | -0.1243 | -1.698 | 0.12152 | 0.253 | -5.21 | 1.92078 | none       |
| MRPL19   | -0.19  | -0.1662 | -1.697 | 0.1217  | 0.253 | -5.21 | 2.1971  | AA-related |
| GCG      | 0.191  | 0.1275  | 1.6964 | 0.12175 | 0.253 | -5.21 | -0.6396 | none       |
| UFSP1    | 0.25   | 0.1293  | 1.6956 | 0.1219  | 0.253 | -5.21 | 0.09701 | none       |
| STAB2    | -0.375 | -0.2263 | -1.695 | 0.12194 | 0.253 | -5.22 | 1.12791 | none       |
| HADHB    | -0.145 | -0.1793 | -1.695 | 0.12194 | 0.253 | -5.22 | 1.27333 | none       |
| ARHGEF25 | 0.248  | 0.2539  | 1.695  | 0.12203 | 0.253 | -5.22 | 1.33643 | none       |
| HIST1H4J | -0.526 | -0.4882 | -1.695 | 0.12204 | 0.253 | -5.22 | 0.22845 | none       |
| AKR1A1   | 0.238  | 0.1155  | 1.6949 | 0.12205 | 0.253 | -5.22 | -0.285  | none       |
| DOCK9    | 0.504  | 0.6702  | 1.6948 | 0.12206 | 0.253 | -5.22 | #####   | none       |
| APELA    | 0.591  | 0.4685  | 1.6948 | 0.12206 | 0.253 | -5.22 | -1.0839 | none       |
| DEF6     | 0.329  | 0.3712  | 1.6948 | 0.12206 | 0.253 | -5.22 | 0.64408 | none       |
| SOCS4    | -0.364 | -0.2748 | -1.694 | 0.12223 | 0.254 | -5.22 | 1.94928 | none       |
| MORN1    | 0.361  | 0.3101  | 1.6937 | 0.12228 | 0.254 | -5.22 | -0.585  | none       |
| GTPBP10  | 0.247  | 0.1295  | 1.6933 | 0.12235 | 0.254 | -5.22 | 0.48601 | none       |
| SNX33    | 0.194  | 0.2072  | 1.6933 | 0.12236 | 0.254 | -5.22 | -0.3875 | none       |
| NIF3L1   | -0.214 | -0.2479 | -1.693 | 0.12238 | 0.254 | -5.22 | 1.60239 | none       |
| ZNF410   | 0.191  | 0.0712  | 1.6925 | 0.1225  | 0.254 | -5.22 | -0.2722 | none       |
| PPP2R3B  | 0.229  | 0.2027  | 1.6923 | 0.12254 | 0.254 | -5.22 | -0.8472 | none       |
| ZNF454   | 0.203  | 0.1204  | 1.6913 | 0.12274 | 0.255 | -5.22 | -0.3864 | none       |
| PELI2    | 0.21   | 0.162   | 1.6913 | 0.12274 | 0.255 | -5.22 | -0.2963 | none       |
| SLC38A10 | 0.156  | 0.1547  | 1.6913 | 0.12275 | 0.255 | -5.22 | -0.2405 | none       |
| NFKBIZ   | 0.46   | 0.5545  | 1.691  | 0.1228  | 0.255 | -5.22 | 0.21086 | none       |
| ARID5A   | 0.244  | 0.2766  | 1.691  | 0.12281 | 0.255 | -5.22 | 0.13374 | none       |
| TM4SF4   | -0.161 | -0.112  | -1.691 | 0.12288 | 0.255 | -5.22 | -0.6168 | none       |
| C1ORF162 | 0.276  | 0.1546  | 1.69   | 0.123   | 0.255 | -5.22 | -0.3319 | none       |
| ETV4     | 0.417  | 0.3466  | 1.6899 | 0.12301 | 0.255 | -5.22 | -0.4697 | none       |
| MTHFD2   | -0.146 | -0.1226 | -1.69  | 0.12308 | 0.255 | -5.22 | 1.56648 | none       |
| SMIM19   | -0.231 | -0.3156 | -1.689 | 0.12316 | 0.255 | -5.22 | 0.50026 | none       |
| CENPM    | -0.281 | -0.263  | -1.689 | 0.12321 | 0.255 | -5.22 | 1.21233 | none       |
| CNPY2    | 0.241  | 0.1108  | 1.6887 | 0.12325 | 0.255 | -5.22 | -0.7539 | none       |
| PPP6R3   | 0.396  | 0.4365  | 1.6886 | 0.12328 | 0.255 | -5.22 | -0.883  | none       |

|          |        |         |        |         |       |       |         |      |
|----------|--------|---------|--------|---------|-------|-------|---------|------|
| CNIH1    | -0.349 | -0.4113 | -1.688 | 0.12333 | 0.255 | -5.23 | 1.65801 | none |
| RANBP10  | 0.277  | 0.3852  | 1.6882 | 0.12334 | 0.255 | -5.23 | 0.28177 | none |
| ZMIZ2    | 0.446  | 0.4655  | 1.6882 | 0.12335 | 0.255 | -5.23 | -0.3607 | none |
| ERCC6L   | 0.433  | 0.4689  | 1.688  | 0.12338 | 0.255 | -5.23 | -0.6395 | none |
| NMT1     | 0.246  | 0.2297  | 1.6876 | 0.12346 | 0.256 | -5.23 | 0.77751 | none |
| MVK      | 0.141  | 0.13    | 1.6869 | 0.1236  | 0.256 | -5.23 | -0.6198 | none |
| TMEM184  | 0.511  | 0.51    | 1.6861 | 0.12376 | 0.256 | -5.23 | 0.16875 | none |
| GEMIN4   | 0.188  | 0.1635  | 1.685  | 0.12399 | 0.257 | -5.23 | 0.61281 | none |
| ATP1A1   | 0.329  | 0.3343  | 1.6848 | 0.12402 | 0.257 | -5.23 | -0.201  | none |
| ZC2HC1A  | -0.191 | -0.2255 | -1.685 | 0.12403 | 0.257 | -5.23 | 0.06559 | none |
| GGN      | 0.356  | 0.2596  | 1.6846 | 0.12406 | 0.257 | -5.23 | -0.1185 | none |
| HBM      | -0.179 | -0.1194 | -1.684 | 0.12418 | 0.257 | -5.23 | 1.24897 | none |
| USP32    | 0.42   | 0.4816  | 1.6839 | 0.12419 | 0.257 | -5.23 | -0.023  | none |
| LEMD2    | 0.288  | 0.2529  | 1.6836 | 0.12426 | 0.257 | -5.23 | -0.3458 | none |
| PHAX     | 0.411  | 0.4356  | 1.6835 | 0.12428 | 0.257 | -5.23 | -0.8225 | none |
| ZNF653   | 0.34   | 0.2988  | 1.6832 | 0.12432 | 0.257 | -5.23 | -0.6612 | none |
| C6ORF58  | 0.124  | 0.1569  | 1.6827 | 0.12444 | 0.257 | -5.23 | -0.8067 | none |
| NSMAF    | 0.245  | 0.2372  | 1.6824 | 0.12449 | 0.257 | -5.23 | -0.7712 | none |
| ELOVL6   | 0.523  | 0.5016  | 1.6823 | 0.1245  | 0.257 | -5.23 | -0.5305 | none |
| ZBTB49   | 0.357  | 0.3168  | 1.6822 | 0.12452 | 0.257 | -5.23 | 0.53239 | none |
| NTMT1    | -0.244 | -0.2042 | -1.682 | 0.12459 | 0.257 | -5.23 | 1.13798 | none |
| RGS20    | -0.225 | -0.1407 | -1.682 | 0.12461 | 0.257 | -5.23 | -0.3422 | none |
| USP31    | 0.15   | 0.1471  | 1.6818 | 0.12462 | 0.257 | -5.23 | -0.0423 | none |
| JMJD4    | 0.174  | 0.1313  | 1.6815 | 0.12467 | 0.257 | -5.23 | -0.4266 | none |
| NAT16    | 0.213  | 0.141   | 1.6815 | 0.12467 | 0.257 | -5.23 | 0.04378 | none |
| GABRR1   | 0.223  | 0.205   | 1.6811 | 0.12474 | 0.258 | -5.24 | -0.4809 | none |
| UBE2E3   | -0.145 | -0.1288 | -1.68  | 0.12499 | 0.258 | -5.24 | 1.19065 | none |
| ENKD1    | 0.395  | 0.3854  | 1.6798 | 0.125   | 0.258 | -5.24 | -0.5918 | none |
| COX7C    | -0.267 | -0.3044 | -1.68  | 0.125   | 0.258 | -5.24 | 1.49214 | none |
| METRNL   | -0.244 | -0.1896 | -1.68  | 0.12503 | 0.258 | -5.24 | 1.45784 | none |
| TRIM2    | 0.354  | 0.3343  | 1.6797 | 0.12503 | 0.258 | -5.24 | 0.88544 | none |
| ESYT1    | 0.147  | 0.1322  | 1.6795 | 0.12506 | 0.258 | -5.24 | 1.02114 | none |
| MICU2    | 0.247  | 0.1921  | 1.6794 | 0.12508 | 0.258 | -5.24 | 0.85881 | none |
| PRAMEF1  | 0.203  | 0.1629  | 1.6794 | 0.12508 | 0.258 | -5.24 | 0.30873 | none |
| COL24A1  | 0.224  | 0.2268  | 1.6792 | 0.12512 | 0.258 | -5.24 | 1.36184 | none |
| VMA21    | -0.3   | -0.3063 | -1.679 | 0.12514 | 0.258 | -5.24 | 1.51273 | none |
| CXORF51A | -0.199 | -0.1683 | -1.679 | 0.12514 | 0.258 | -5.24 | 1.76991 | none |
| HLA-DMB  | 0.154  | 0.1374  | 1.6791 | 0.12514 | 0.258 | -5.24 | 0.45786 | none |
| AC141272 | -0.177 | -0.1183 | -1.679 | 0.12516 | 0.258 | -5.24 | 1.24897 | none |
| RETNLB   | 0.171  | 0.1211  | 1.679  | 0.12517 | 0.258 | -5.24 | 0.18447 | none |



|          |        |         |        |         |       |       |         |      |
|----------|--------|---------|--------|---------|-------|-------|---------|------|
| SLC34A1  | 0.114  | 0.1333  | 1.6789 | 0.12518 | 0.258 | -5.24 | -0.7854 | none |
| BMF      | 0.368  | 0.3517  | 1.6789 | 0.12518 | 0.258 | -5.24 | 0.40435 | none |
| METTL8   | 0.254  | 0.1762  | 1.6789 | 0.12519 | 0.258 | -5.24 | 0.344   | none |
| CDC34    | 0.325  | 0.2259  | 1.6788 | 0.12521 | 0.258 | -5.24 | -0.6257 | none |
| PATL1    | 0.341  | 0.3989  | 1.6787 | 0.12522 | 0.258 | -5.24 | -0.1651 | none |
| OSTF1    | -0.117 | -0.1441 | -1.679 | 0.12525 | 0.258 | -5.24 | 1.31305 | none |
| STAR     | 0.223  | 0.115   | 1.6783 | 0.1253  | 0.258 | -5.24 | 0.42243 | none |
| OPN5     | 0.207  | 0.1472  | 1.6783 | 0.12531 | 0.258 | -5.24 | -1.2028 | none |
| PSMD7    | -0.115 | -0.075  | -1.678 | 0.12535 | 0.258 | -5.24 | -0.1349 | none |
| CHD3     | 0.688  | 0.7847  | 1.6779 | 0.12538 | 0.258 | -5.24 | -0.5293 | none |
| TBX21    | 0.225  | 0.286   | 1.6779 | 0.12538 | 0.258 | -5.24 | -0.5626 | none |
| HNRNPF   | -0.206 | -0.2068 | -1.678 | 0.1254  | 0.258 | -5.24 | 1.82385 | none |
| C18ORF21 | -0.347 | -0.2749 | -1.678 | 0.12545 | 0.258 | -5.24 | 1.78205 | none |
| DES      | 0.251  | 0.2549  | 1.6775 | 0.12547 | 0.258 | -5.24 | -0.32   | none |
| RNPEP    | 0.127  | 0.1219  | 1.6768 | 0.12561 | 0.258 | -5.24 | 0.10144 | none |
| HMGN3    | -0.147 | -0.1795 | -1.676 | 0.12568 | 0.259 | -5.24 | 0.55    | none |
| ERGIC2   | -0.235 | -0.1997 | -1.676 | 0.12578 | 0.259 | -5.24 | 1.6728  | none |
| SMTN     | 0.377  | 0.3519  | 1.6758 | 0.12581 | 0.259 | -5.24 | -0.1732 | none |
| BET1L    | 0.197  | 0.2398  | 1.6757 | 0.12582 | 0.259 | -5.24 | 1.1053  | none |
| CORO1A   | -0.164 | -0.1306 | -1.676 | 0.12584 | 0.259 | -5.24 | 1.43635 | none |
| NAA11    | 0.204  | 0.1356  | 1.6754 | 0.12588 | 0.259 | -5.24 | -1.155  | none |
| NT5C1A   | -0.168 | -0.1273 | -1.675 | 0.1259  | 0.259 | -5.24 | 2.04812 | none |
| PTGER2   | 0.176  | 0.0638  | 1.6751 | 0.12594 | 0.259 | -5.24 | 0.67806 | none |
| WFDC3    | 0.591  | 0.3985  | 1.6737 | 0.12622 | 0.259 | -5.25 | -0.7499 | none |
| HS3ST3A1 | 0.298  | 0.3046  | 1.6736 | 0.12624 | 0.259 | -5.25 | -0.679  | none |
| ST6GALNA | 0.167  | 0.1256  | 1.6732 | 0.12632 | 0.26  | -5.25 | 0.18521 | none |
| SUPT6H   | 0.567  | 0.7103  | 1.6726 | 0.12645 | 0.26  | -5.25 | -0.5052 | none |
| RPS19BP1 | -0.137 | -0.0595 | -1.672 | 0.12647 | 0.26  | -5.25 | 1.37993 | none |
| PDCD2L   | -0.367 | -0.3795 | -1.672 | 0.12651 | 0.26  | -5.25 | 1.11627 | none |
| KITLG    | 0.128  | 0.1621  | 1.6718 | 0.12661 | 0.26  | -5.25 | -0.5724 | none |
| HIC1     | 0.343  | 0.2812  | 1.6717 | 0.12662 | 0.26  | -5.25 | -0.8682 | none |
| SOX15    | 0.183  | 0.2149  | 1.6716 | 0.12665 | 0.26  | -5.25 | 0.44248 | none |
| FUS      | 0.223  | 0.2434  | 1.6711 | 0.12675 | 0.26  | -5.25 | -0.0239 | none |
| SLC24A1  | 0.616  | 0.5913  | 1.671  | 0.12677 | 0.26  | -5.25 | -0.7592 | none |
| BCL2L13  | 0.172  | 0.0869  | 1.6706 | 0.12684 | 0.26  | -5.25 | -1.2194 | none |
| B3GALT2  | 0.165  | 0.1177  | 1.6706 | 0.12684 | 0.26  | -5.25 | -0.8527 | none |
| TCEAL8   | -0.305 | -0.2798 | -1.67  | 0.12692 | 0.26  | -5.25 | 1.77877 | none |
| RPL4     | -0.162 | -0.0966 | -1.67  | 0.12697 | 0.26  | -5.25 | 1.69024 | none |
| ZGPAT    | 0.19   | 0.2037  | 1.67   | 0.12697 | 0.26  | -5.25 | -0.7016 | none |
| IL1RL2   | -0.215 | -0.1791 | -1.669 | 0.12709 | 0.261 | -5.25 | -0.0587 | none |

|         |        |         |        |         |       |       |         |      |
|---------|--------|---------|--------|---------|-------|-------|---------|------|
| STK26   | 0.149  | 0.1076  | 1.6693 | 0.1271  | 0.261 | -5.25 | 1.05724 | none |
| IGFBP2  | 0.261  | 0.1999  | 1.6691 | 0.12714 | 0.261 | -5.25 | 0.02834 | none |
| TRIM3   | 0.234  | 0.1929  | 1.669  | 0.12717 | 0.261 | -5.25 | 0.18623 | none |
| TTC6    | 0.464  | 0.3956  | 1.6688 | 0.1272  | 0.261 | -5.25 | -0.8227 | none |
| KRT77   | 0.247  | 0.159   | 1.6686 | 0.12725 | 0.261 | -5.25 | -1.295  | none |
| SLC6A18 | -0.129 | -0.1009 | -1.668 | 0.12728 | 0.261 | -5.25 | 0.08072 | none |
| NEDD9   | 0.371  | 0.4111  | 1.668  | 0.12737 | 0.261 | -5.25 | -0.2194 | none |
| CYSTM1  | 0.343  | 0.2206  | 1.6676 | 0.12744 | 0.261 | -5.25 | -0.3017 | none |
| BOLA2B  | -0.339 | -0.3543 | -1.668 | 0.12746 | 0.261 | -5.25 | 1.24999 | none |
| BLM     | 0.415  | 0.5004  | 1.666  | 0.12777 | 0.262 | -5.26 | 0.05369 | none |
| BOLA2   | -0.322 | -0.3028 | -1.666 | 0.12778 | 0.262 | -5.26 | 0.89827 | none |
| MON1A   | 0.261  | 0.2084  | 1.6658 | 0.12782 | 0.262 | -5.26 | -0.7138 | none |
| ZFYVE9  | 0.156  | 0.1485  | 1.6655 | 0.12787 | 0.262 | -5.26 | -0.5222 | none |
| RAB13   | 0.325  | 0.2268  | 1.6651 | 0.12795 | 0.262 | -5.26 | -1.1291 | none |
| ADAM9   | 0.262  | 0.2653  | 1.665  | 0.12797 | 0.262 | -5.26 | 0.35627 | none |
| STK32C  | 0.244  | 0.2331  | 1.6649 | 0.128   | 0.262 | -5.26 | 0.34071 | none |
| SSH1    | 0.512  | 0.525   | 1.6642 | 0.12813 | 0.262 | -5.26 | -0.3009 | none |
| ARF1    | -0.163 | -0.1305 | -1.664 | 0.12821 | 0.262 | -5.26 | 1.53534 | none |
| TXLNB   | 0.207  | 0.1754  | 1.6638 | 0.12822 | 0.262 | -5.26 | -0.1474 | none |
| TRAPPC4 | 0.233  | 0.0925  | 1.6638 | 0.12822 | 0.262 | -5.26 | -0.847  | none |
| PPAT    | 0.213  | 0.211   | 1.6635 | 0.12829 | 0.262 | -5.26 | -0.1084 | none |
| BCLAF1  | 0.658  | 0.7598  | 1.6634 | 0.12829 | 0.262 | -5.26 | -0.1862 | none |
| ZFR     | 0.381  | 0.4232  | 1.6632 | 0.12833 | 0.262 | -5.26 | -0.2474 | none |
| FAT3    | 0.215  | 0.171   | 1.663  | 0.12839 | 0.263 | -5.26 | -0.2741 | none |
| C5ORF63 | 0.223  | 0.1104  | 1.6628 | 0.12841 | 0.263 | -5.26 | 0.05278 | none |
| LAMA5   | 0.288  | 0.2368  | 1.6626 | 0.12846 | 0.263 | -5.26 | -0.3521 | none |
| ZBTB4   | 0.214  | 0.2265  | 1.6626 | 0.12847 | 0.263 | -5.26 | -0.425  | none |
| BRD4    | 0.556  | 0.6729  | 1.6625 | 0.12849 | 0.263 | -5.26 | 0.29201 | none |
| C7ORF26 | 0.432  | 0.3564  | 1.6623 | 0.12851 | 0.263 | -5.26 | -1.0884 | none |
| NFYA    | 0.3    | 0.3092  | 1.6622 | 0.12854 | 0.263 | -5.26 | -0.4721 | none |
| LRBA    | 0.277  | 0.2523  | 1.662  | 0.12859 | 0.263 | -5.26 | 0.20541 | none |
| NRP1    | 0.415  | 0.4624  | 1.6616 | 0.12866 | 0.263 | -5.26 | -0.3752 | none |
| NDUFB8  | -0.222 | -0.2078 | -1.661 | 0.12876 | 0.263 | -5.26 | -0.058  | none |
| DBNDD1  | 0.239  | 0.2074  | 1.6609 | 0.12881 | 0.263 | -5.26 | 0.21661 | none |
| TMEM39B | 0.255  | 0.1828  | 1.6607 | 0.12885 | 0.263 | -5.26 | -0.1744 | none |
| TM9SF4  | 0.18   | 0.2065  | 1.6601 | 0.12898 | 0.263 | -5.26 | 0.07511 | none |
| MBD6    | 0.355  | 0.4236  | 1.6599 | 0.12901 | 0.263 | -5.26 | 0.90756 | none |
| CD1E    | -0.205 | -0.1747 | -1.66  | 0.12902 | 0.263 | -5.26 | 0.93543 | none |
| IL4     | -0.448 | -0.4373 | -1.66  | 0.12903 | 0.263 | -5.26 | 1.30889 | none |
| GLIS3   | 0.422  | 0.3476  | 1.6597 | 0.12905 | 0.263 | -5.27 | -1.0438 | none |

|          |        |         |        |         |       |       |         |            |
|----------|--------|---------|--------|---------|-------|-------|---------|------------|
| CD9      | -0.386 | -0.3256 | -1.66  | 0.12909 | 0.263 | -5.27 | 2.17402 | AA-related |
| ABHD3    | 0.193  | 0.07    | 1.6593 | 0.12913 | 0.264 | -5.27 | 0.57044 | none       |
| RETN     | -0.172 | -0.1144 | -1.659 | 0.12914 | 0.264 | -5.27 | 0.65738 | none       |
| RASA3    | 0.278  | 0.2796  | 1.6591 | 0.12916 | 0.264 | -5.27 | 0.42069 | none       |
| TMEM8A   | 0.148  | 0.1458  | 1.6591 | 0.12917 | 0.264 | -5.27 | -0.4087 | none       |
| OTC      | -0.172 | -0.1145 | -1.659 | 0.12921 | 0.264 | -5.27 | -0.1926 | none       |
| SEMA4D   | 0.445  | 0.5067  | 1.6589 | 0.12921 | 0.264 | -5.27 | -0.8613 | none       |
| IDH2     | -0.256 | -0.223  | -1.659 | 0.12927 | 0.264 | -5.27 | 2.08407 | none       |
| PC       | 0.274  | 0.3313  | 1.6586 | 0.12928 | 0.264 | -5.27 | 0.324   | none       |
| MYL12A   | -0.187 | -0.2541 | -1.659 | 0.12929 | 0.264 | -5.27 | 0.71871 | none       |
| UBLCP1   | -0.193 | -0.1641 | -1.658 | 0.1293  | 0.264 | -5.27 | 2.15085 | AA-related |
| NBL1     | -0.243 | -0.207  | -1.658 | 0.12934 | 0.264 | -5.27 | -0.0537 | none       |
| CHMP6    | -0.152 | -0.0775 | -1.658 | 0.12937 | 0.264 | -5.27 | 1.70688 | none       |
| SPRN     | 0.203  | 0.1282  | 1.6576 | 0.12949 | 0.264 | -5.27 | -1.2542 | none       |
| THAP4    | 0.206  | 0.2494  | 1.6572 | 0.12957 | 0.264 | -5.27 | -0.3115 | none       |
| CEP295   | 0.412  | 0.4069  | 1.657  | 0.1296  | 0.264 | -5.27 | -0.1356 | none       |
| BAG2     | 0.114  | 0.0551  | 1.6569 | 0.12963 | 0.264 | -5.27 | 0.53549 | none       |
| USP34    | 0.41   | 0.4196  | 1.6567 | 0.12967 | 0.264 | -5.27 | -0.5719 | none       |
| FN3KRP   | 0.203  | 0.1541  | 1.6566 | 0.12969 | 0.264 | -5.27 | -0.5582 | none       |
| KRT5     | -0.177 | -0.1567 | -1.655 | 0.12991 | 0.265 | -5.27 | 0.70152 | none       |
| RALGDS   | 0.343  | 0.419   | 1.6549 | 0.13004 | 0.265 | -5.27 | -0.0506 | none       |
| EIF4EBP3 | -0.62  | -0.524  | -1.655 | 0.1301  | 0.265 | -5.27 | 0.48719 | none       |
| S1PR5    | 0.303  | 0.2149  | 1.6539 | 0.13025 | 0.265 | -5.27 | 0.07663 | none       |
| CNP      | 0.26   | 0.2386  | 1.6534 | 0.13034 | 0.265 | -5.27 | -0.7404 | none       |
| CDK4     | -0.211 | -0.218  | -1.652 | 0.13054 | 0.266 | -5.28 | 1.3517  | none       |
| UPF1     | 0.492  | 0.61    | 1.652  | 0.13064 | 0.266 | -5.28 | -0.1872 | none       |
| HUWE1    | 0.493  | 0.6418  | 1.6517 | 0.1307  | 0.266 | -5.28 | -0.6889 | none       |
| PSORS1C1 | -0.147 | -0.1006 | -1.651 | 0.13077 | 0.266 | -5.28 | 0.9826  | none       |
| NHLH1    | 0.129  | 0.1143  | 1.6509 | 0.13085 | 0.266 | -5.28 | -0.7888 | none       |
| TSKU     | 0.158  | 0.0988  | 1.6507 | 0.13091 | 0.266 | -5.28 | 0.28329 | none       |
| MAP7D3   | 0.471  | 0.5007  | 1.6502 | 0.131   | 0.266 | -5.28 | -0.7725 | none       |
| TOPORS   | 0.399  | 0.4563  | 1.6501 | 0.13103 | 0.266 | -5.28 | 0.07854 | none       |
| NDUFB3   | -0.217 | -0.2579 | -1.65  | 0.13112 | 0.267 | -5.28 | 0.89413 | none       |
| PRELID1  | -0.173 | -0.1346 | -1.649 | 0.13115 | 0.267 | -5.28 | 1.59035 | none       |
| SLFN5    | 0.418  | 0.4495  | 1.6493 | 0.13118 | 0.267 | -5.28 | 0.38667 | none       |
| TRAPPC3  | -0.208 | -0.2202 | -1.649 | 0.13133 | 0.267 | -5.28 | 1.36396 | none       |
| EP400    | 0.442  | 0.5607  | 1.6483 | 0.13139 | 0.267 | -5.28 | -0.378  | none       |
| ARL4A    | -0.235 | -0.1931 | -1.648 | 0.13151 | 0.267 | -5.28 | 1.68763 | none       |
| SLC39A8  | 0.212  | 0.1214  | 1.6474 | 0.13159 | 0.267 | -5.28 | 1.41367 | none       |
| PSMC5    | -0.137 | -0.094  | -1.647 | 0.13167 | 0.267 | -5.28 | 1.3159  | none       |

|         |        |         |        |         |       |       |         |      |
|---------|--------|---------|--------|---------|-------|-------|---------|------|
| CXCR5   | 0.342  | 0.4212  | 1.6469 | 0.13168 | 0.267 | -5.28 | -0.5403 | none |
| HABP4   | 0.271  | 0.249   | 1.6466 | 0.13176 | 0.268 | -5.28 | -0.9719 | none |
| TBKBP1  | 0.246  | 0.2607  | 1.6462 | 0.13183 | 0.268 | -5.28 | -0.5564 | none |
| HAX1    | -0.303 | -0.3585 | -1.646 | 0.13187 | 0.268 | -5.28 | 1.74946 | none |
| NDUFAF7 | -0.171 | -0.2007 | -1.646 | 0.13194 | 0.268 | -5.28 | 1.12183 | none |
| NPEPL1  | 0.17   | 0.134   | 1.6456 | 0.13196 | 0.268 | -5.28 | 0.1314  | none |
| DMRT1   | 0.21   | 0.1237  | 1.6455 | 0.13199 | 0.268 | -5.28 | -1.2437 | none |
| RFX4    | 0.136  | 0.0893  | 1.6453 | 0.13203 | 0.268 | -5.29 | -0.4127 | none |
| SYPL2   | 0.14   | 0.1297  | 1.6453 | 0.13203 | 0.268 | -5.29 | 0.2591  | none |
| MRPL20  | -0.215 | -0.2434 | -1.645 | 0.13206 | 0.268 | -5.29 | 0.49796 | none |
| ZNF488  | -0.112 | -0.0674 | -1.645 | 0.13209 | 0.268 | -5.29 | 0.24113 | none |
| SSTR3   | 0.205  | 0.227   | 1.6449 | 0.1321  | 0.268 | -5.29 | 1.02329 | none |
| F9      | -0.137 | -0.0997 | -1.645 | 0.13212 | 0.268 | -5.29 | 1.84901 | none |
| ALAD    | 0.211  | 0.2266  | 1.6448 | 0.13213 | 0.268 | -5.29 | -0.2133 | none |
| TSPAN2  | -0.154 | -0.1509 | -1.645 | 0.13217 | 0.268 | -5.29 | 0.71973 | none |
| NPM2    | 0.375  | 0.2428  | 1.6443 | 0.13222 | 0.268 | -5.29 | -1.2131 | none |
| DNAJC21 | 0.508  | 0.5558  | 1.6442 | 0.13225 | 0.268 | -5.29 | -0.3866 | none |
| SCD     | 0.242  | 0.3586  | 1.644  | 0.1323  | 0.268 | -5.29 | 0.02055 | none |
| GADD45G | 0.371  | 0.3868  | 1.644  | 0.1323  | 0.268 | -5.29 | -0.8704 | none |
| DTHD1   | -0.159 | -0.1144 | -1.644 | 0.13231 | 0.268 | -5.29 | 0.28288 | none |
| CERS4   | 0.216  | 0.1439  | 1.6435 | 0.1324  | 0.268 | -5.29 | 0.53471 | none |
| HIPK3   | 0.167  | 0.1473  | 1.6434 | 0.13242 | 0.268 | -5.29 | 0.41982 | none |
| NAA30   | 0.212  | 0.1054  | 1.6432 | 0.13245 | 0.268 | -5.29 | 0.02687 | none |
| CPSF4L  | 0.202  | 0.1816  | 1.6432 | 0.13246 | 0.268 | -5.29 | 0.69015 | none |
| ZDHHC20 | 0.293  | 0.2699  | 1.6427 | 0.13257 | 0.268 | -5.29 | 0.28333 | none |
| TMCO2   | 0.213  | 0.1093  | 1.6423 | 0.13264 | 0.269 | -5.29 | -0.5344 | none |
| GHITM   | -0.183 | -0.2003 | -1.642 | 0.13272 | 0.269 | -5.29 | 0.64216 | none |
| AGPAT3  | 0.373  | 0.3461  | 1.6416 | 0.13279 | 0.269 | -5.29 | -1.0347 | none |
| ACOT1   | 0.333  | 0.2814  | 1.6416 | 0.13279 | 0.269 | -5.29 | -0.0252 | none |
| EFL1    | 0.448  | 0.4366  | 1.6414 | 0.13283 | 0.269 | -5.29 | -0.1867 | none |
| KLK5    | -0.145 | -0.1309 | -1.641 | 0.13293 | 0.269 | -5.29 | 1.33192 | none |
| SSX2B   | 0.208  | 0.1823  | 1.6408 | 0.13297 | 0.269 | -5.29 | 0.89495 | none |
| WARS    | 0.202  | 0.1892  | 1.6403 | 0.13306 | 0.269 | -5.29 | 0.09051 | none |
| CT45A7  | -0.166 | -0.1108 | -1.64  | 0.13311 | 0.269 | -5.29 | 0.23066 | none |
| ZNF654  | 0.245  | 0.2577  | 1.6399 | 0.13314 | 0.269 | -5.29 | 0.16739 | none |
| PCP4L1  | 0.131  | 0.1261  | 1.6398 | 0.13318 | 0.269 | -5.29 | -0.0239 | none |
| ZNF571  | 0.271  | 0.2466  | 1.6397 | 0.13319 | 0.269 | -5.29 | -0.0606 | none |
| GANC    | 0.26   | 0.2433  | 1.6396 | 0.13322 | 0.269 | -5.29 | -0.7825 | none |
| NACC2   | 0.191  | 0.206   | 1.6396 | 0.13322 | 0.269 | -5.29 | -0.6585 | none |
| SYT6    | -0.16  | -0.148  | -1.639 | 0.13333 | 0.27  | -5.29 | 1.04285 | none |

|          |        |         |        |         |       |       |         |            |
|----------|--------|---------|--------|---------|-------|-------|---------|------------|
| CNOT3    | 0.434  | 0.4978  | 1.639  | 0.13334 | 0.27  | -5.29 | 0.0222  | none       |
| IQCF1    | 0.31   | 0.2252  | 1.639  | 0.13335 | 0.27  | -5.29 | -1.0159 | none       |
| TLL11    | -0.207 | -0.1396 | -1.639 | 0.13339 | 0.27  | -5.29 | -0.4446 | none       |
| KIAA1614 | 0.429  | 0.3975  | 1.638  | 0.13355 | 0.27  | -5.3  | 0.1093  | none       |
| TMEM256  | -0.317 | -0.383  | -1.638 | 0.1336  | 0.27  | -5.3  | 1.87655 | none       |
| EIF3D    | -0.16  | -0.098  | -1.637 | 0.13371 | 0.27  | -5.3  | 1.96197 | none       |
| RBBP7    | -0.124 | -0.138  | -1.637 | 0.13374 | 0.27  | -5.3  | 1.20004 | none       |
| AP3B1    | 0.435  | 0.4411  | 1.6371 | 0.13374 | 0.27  | -5.3  | -0.5653 | none       |
| ESAM     | 0.223  | 0.1284  | 1.637  | 0.13376 | 0.27  | -5.3  | -0.5414 | none       |
| CHPF2    | 0.178  | 0.1244  | 1.6367 | 0.13383 | 0.27  | -5.3  | 0.6502  | none       |
| RIN3     | 0.366  | 0.4192  | 1.6366 | 0.13385 | 0.27  | -5.3  | -0.3288 | none       |
| PHF12    | 0.494  | 0.5409  | 1.6362 | 0.13392 | 0.27  | -5.3  | -0.7945 | none       |
| ETFB     | -0.165 | -0.1252 | -1.636 | 0.13398 | 0.27  | -5.3  | 0.37807 | none       |
| POU2F2   | 0.432  | 0.549   | 1.6357 | 0.13404 | 0.271 | -5.3  | 0.54629 | none       |
| ZBTB39   | 0.167  | 0.1958  | 1.6355 | 0.13408 | 0.271 | -5.3  | -0.4175 | none       |
| PLXNA4   | 0.166  | 0.1578  | 1.6352 | 0.13414 | 0.271 | -5.3  | 0.51548 | none       |
| SPANXN5  | 0.113  | 0.1128  | 1.6346 | 0.13427 | 0.271 | -5.3  | -0.0749 | none       |
| QDPR     | -0.212 | -0.1888 | -1.634 | 0.13447 | 0.271 | -5.3  | 2.16259 | AA-related |
| CYB561A3 | 0.278  | 0.0916  | 1.6328 | 0.13465 | 0.272 | -5.3  | -0.1754 | none       |
| OPA1     | 0.47   | 0.4969  | 1.6322 | 0.13479 | 0.272 | -5.3  | 0.15643 | none       |
| FOSL2    | 0.335  | 0.3367  | 1.6321 | 0.13481 | 0.272 | -5.3  | -0.8341 | none       |
| PIP4K2C  | 0.129  | 0.084   | 1.6317 | 0.13488 | 0.272 | -5.3  | -0.1493 | none       |
| SLC36A3  | 0.161  | 0.0915  | 1.6316 | 0.1349  | 0.272 | -5.3  | -0.9085 | none       |
| HORMAD2  | 0.171  | 0.1651  | 1.6316 | 0.13491 | 0.272 | -5.3  | -0.1003 | none       |
| USP16    | 0.561  | 0.5407  | 1.6315 | 0.13492 | 0.272 | -5.3  | 0.4405  | none       |
| JAKMIP1  | 0.253  | 0.2627  | 1.6314 | 0.13494 | 0.272 | -5.3  | 0.79704 | none       |
| TLL1     | 0.186  | 0.1222  | 1.6312 | 0.135   | 0.272 | -5.3  | 0.65544 | none       |
| SDHC     | -0.275 | -0.3161 | -1.631 | 0.13503 | 0.272 | -5.3  | 0.97954 | none       |
| BEX4     | -0.14  | -0.1459 | -1.631 | 0.13504 | 0.272 | -5.3  | 2.0962  | AA-related |
| HMGXB3   | 0.277  | 0.3633  | 1.6309 | 0.13506 | 0.272 | -5.3  | 0.35387 | none       |
| CBX4     | 0.337  | 0.3301  | 1.6308 | 0.13507 | 0.272 | -5.31 | 0.23708 | none       |
| CREB3    | -0.137 | -0.1044 | -1.631 | 0.13507 | 0.272 | -5.31 | 1.68206 | none       |
| ZNF780A  | 0.259  | 0.2548  | 1.6306 | 0.13513 | 0.272 | -5.31 | 0.7339  | none       |
| HLA-DMA  | 0.435  | 0.3132  | 1.6304 | 0.13516 | 0.272 | -5.31 | 0.10301 | none       |
| SMDT1    | -0.26  | -0.2608 | -1.63  | 0.13519 | 0.272 | -5.31 | 1.64246 | none       |
| LANCL2   | -0.223 | -0.1622 | -1.63  | 0.13522 | 0.272 | -5.31 | -0.34   | none       |
| NDUFA4L2 | -0.296 | -0.1499 | -1.63  | 0.13526 | 0.272 | -5.31 | 1.06953 | none       |
| CLEC4A   | -0.394 | -0.287  | -1.63  | 0.13527 | 0.272 | -5.31 | 1.34232 | none       |
| AHSA1    | 0.144  | 0.1127  | 1.6293 | 0.13539 | 0.272 | -5.31 | -0.7087 | none       |
| LIG4     | 0.251  | 0.1868  | 1.629  | 0.13546 | 0.273 | -5.31 | 0.18379 | none       |

|          |        |         |        |         |       |       |         |            |
|----------|--------|---------|--------|---------|-------|-------|---------|------------|
| UQCR11   | -0.255 | -0.2674 | -1.628 | 0.13558 | 0.273 | -5.31 | 1.65658 | none       |
| FANCG    | 0.169  | 0.1552  | 1.6282 | 0.13563 | 0.273 | -5.31 | 0.12795 | none       |
| EIF3K    | -0.27  | -0.314  | -1.628 | 0.13563 | 0.273 | -5.31 | 1.37061 | none       |
| TWIST1   | 0.217  | 0.2105  | 1.6279 | 0.13569 | 0.273 | -5.31 | -0.8942 | none       |
| HAVCR2   | 0.188  | 0.0729  | 1.6278 | 0.13572 | 0.273 | -5.31 | -0.6712 | none       |
| ATP6V0B  | -0.347 | -0.3591 | -1.628 | 0.13573 | 0.273 | -5.31 | 1.44922 | none       |
| HOXC9    | 0.15   | 0.1519  | 1.6267 | 0.13594 | 0.273 | -5.31 | 0.66468 | none       |
| LARP1    | 0.523  | 0.6134  | 1.6266 | 0.13597 | 0.273 | -5.31 | -0.3104 | none       |
| SNW1     | 0.382  | 0.4182  | 1.6265 | 0.136   | 0.273 | -5.31 | -0.3863 | none       |
| ITSN2    | 0.454  | 0.5084  | 1.6263 | 0.13603 | 0.273 | -5.31 | -0.539  | none       |
| ARL4D    | 0.235  | 0.1661  | 1.6262 | 0.13606 | 0.273 | -5.31 | -0.3572 | none       |
| C12ORF57 | -0.287 | -0.3371 | -1.626 | 0.13608 | 0.273 | -5.31 | 0.83769 | none       |
| RNASE4   | -0.279 | -0.2579 | -1.626 | 0.13617 | 0.274 | -5.31 | 1.87438 | none       |
| TAB3     | 0.273  | 0.2959  | 1.6253 | 0.13626 | 0.274 | -5.31 | -0.2896 | none       |
| SLA2     | 0.153  | 0.1187  | 1.6244 | 0.13644 | 0.274 | -5.31 | -0.6271 | none       |
| C1QTNF9E | -0.256 | -0.2677 | -1.623 | 0.13669 | 0.274 | -5.32 | 1.01171 | none       |
| MCMDC2   | 0.141  | 0.0577  | 1.6233 | 0.13669 | 0.274 | -5.32 | 0.03875 | none       |
| RASA2    | 0.369  | 0.2879  | 1.6232 | 0.13671 | 0.274 | -5.32 | 0.23688 | none       |
| NCOA2    | -0.15  | -0.0879 | -1.622 | 0.13694 | 0.275 | -5.32 | 0.14789 | none       |
| ERAL1    | -0.141 | -0.0895 | -1.622 | 0.13699 | 0.275 | -5.32 | 2.50097 | AA-related |
| ARSF     | 0.113  | 0.0826  | 1.6218 | 0.137   | 0.275 | -5.32 | 0       | none       |
| SRSF1    | -0.163 | -0.1544 | -1.622 | 0.13703 | 0.275 | -5.32 | 1.72986 | none       |
| USP44    | 0.163  | 0.1483  | 1.6215 | 0.13707 | 0.275 | -5.32 | 0.00486 | none       |
| SP1      | 0.365  | 0.3272  | 1.6214 | 0.13709 | 0.275 | -5.32 | 0.66329 | none       |
| SLC45A3  | -0.125 | -0.1055 | -1.621 | 0.13713 | 0.275 | -5.32 | 0.51562 | none       |
| FZR1     | 0.356  | 0.3902  | 1.6211 | 0.13716 | 0.275 | -5.32 | -0.2391 | none       |
| ACTL10   | -0.149 | -0.1522 | -1.621 | 0.13724 | 0.275 | -5.32 | -0.1459 | none       |
| PRR14L   | 0.428  | 0.4754  | 1.6206 | 0.13726 | 0.275 | -5.32 | 0.07914 | none       |
| PKD2L1   | 0.15   | 0.1071  | 1.6205 | 0.13729 | 0.275 | -5.32 | -0.7868 | none       |
| PDCD11   | 0.366  | 0.4593  | 1.6198 | 0.13743 | 0.276 | -5.32 | 0.15002 | none       |
| NUCB1    | 0.262  | 0.3007  | 1.6196 | 0.13747 | 0.276 | -5.32 | -0.9136 | none       |
| ZNF326   | 0.28   | 0.2888  | 1.6196 | 0.13748 | 0.276 | -5.32 | -0.3195 | none       |
| CLK3     | 0.22   | 0.2623  | 1.6193 | 0.13754 | 0.276 | -5.32 | -0.1598 | none       |
| MUC12    | 0.321  | 0.3451  | 1.6193 | 0.13754 | 0.276 | -5.32 | 0.36148 | none       |
| ZCCHC7   | 0.256  | 0.17    | 1.6191 | 0.13759 | 0.276 | -5.32 | -0.1512 | none       |
| TMED1    | 0.136  | 0.119   | 1.6189 | 0.13763 | 0.276 | -5.32 | -0.1259 | none       |
| TRIM63   | 0.211  | 0.1942  | 1.6184 | 0.13773 | 0.276 | -5.32 | 1.15769 | none       |
| ANGPTL2  | -0.18  | -0.1151 | -1.618 | 0.13774 | 0.276 | -5.32 | -0.5916 | none       |
| MCL1     | 0.16   | 0.1277  | 1.6183 | 0.13775 | 0.276 | -5.32 | 0.24624 | none       |
| MMP19    | 0.218  | 0.2226  | 1.6181 | 0.1378  | 0.276 | -5.32 | 1.10671 | none       |

|           |        |         |        |         |       |       |         |            |
|-----------|--------|---------|--------|---------|-------|-------|---------|------------|
| CALCA     | -0.181 | -0.1898 | -1.618 | 0.1378  | 0.276 | -5.32 | 0.08974 | none       |
| CCDC187   | 0.126  | 0.1024  | 1.6179 | 0.13785 | 0.276 | -5.32 | -1.2454 | none       |
| MYO18B    | 0.206  | 0.1817  | 1.6179 | 0.13785 | 0.276 | -5.32 | -0.9864 | none       |
| ATG101    | -0.244 | -0.2342 | -1.618 | 0.13786 | 0.276 | -5.32 | 1.21412 | none       |
| NPAS1     | -0.227 | -0.2079 | -1.618 | 0.13793 | 0.276 | -5.32 | 0.0819  | none       |
| SHISA8    | -0.193 | -0.1066 | -1.617 | 0.13798 | 0.276 | -5.32 | 0.58692 | none       |
| DDX43     | 0.296  | 0.1509  | 1.6172 | 0.13799 | 0.276 | -5.32 | -0.1723 | none       |
| COPS5     | -0.135 | -0.1719 | -1.617 | 0.13801 | 0.276 | -5.32 | 1.68977 | none       |
| MPDZ      | -0.12  | -0.0853 | -1.617 | 0.1381  | 0.276 | -5.32 | 0.80752 | none       |
| ASIP      | 0.155  | 0.17    | 1.6167 | 0.13811 | 0.276 | -5.32 | -0.5444 | none       |
| CNNM4     | -0.181 | -0.0743 | -1.616 | 0.13818 | 0.276 | -5.32 | 1.8767  | none       |
| NBAS      | 0.415  | 0.3951  | 1.6161 | 0.13824 | 0.276 | -5.33 | -0.3572 | none       |
| AC007326  | 0.168  | 0.2214  | 1.6159 | 0.13828 | 0.276 | -5.33 | 1.1581  | none       |
| DNAH7     | 0.291  | 0.2901  | 1.6158 | 0.13831 | 0.277 | -5.33 | -0.1987 | none       |
| TMED3     | -0.222 | -0.184  | -1.616 | 0.13834 | 0.277 | -5.33 | 1.64956 | none       |
| RAVER2    | 0.129  | 0.0916  | 1.6154 | 0.13839 | 0.277 | -5.33 | -0.6347 | none       |
| SLC20A1   | 0.154  | 0.1112  | 1.615  | 0.13847 | 0.277 | -5.33 | 0.65781 | none       |
| SNX31     | 0.673  | 0.4812  | 1.6149 | 0.1385  | 0.277 | -5.33 | -1.0186 | none       |
| SLC35F4   | 0.218  | 0.2392  | 1.6137 | 0.13875 | 0.277 | -5.33 | 0.04258 | none       |
| FAM216B   | 0.123  | 0.0932  | 1.6136 | 0.13878 | 0.277 | -5.33 | -1.2576 | none       |
| FXVD6-FXY | -0.159 | -0.1061 | -1.613 | 0.13886 | 0.277 | -5.33 | 0.86195 | none       |
| MPP2      | 0.125  | 0.0933  | 1.6121 | 0.13911 | 0.278 | -5.33 | -0.007  | none       |
| VMO1      | -0.135 | -0.1376 | -1.611 | 0.13931 | 0.278 | -5.33 | -0.1619 | none       |
| DDRKG1    | 0.202  | 0.217   | 1.6108 | 0.13938 | 0.278 | -5.33 | 0.35925 | none       |
| OXA1L     | 0.15   | 0.0821  | 1.6107 | 0.13941 | 0.278 | -5.33 | 0.1467  | none       |
| KRCC1     | -0.283 | -0.2658 | -1.611 | 0.13943 | 0.278 | -5.33 | 2.18614 | AA-related |
| COQ3      | 0.247  | 0.134   | 1.6102 | 0.13951 | 0.278 | -5.33 | -0.6183 | none       |
| OR13C5    | -0.136 | -0.0999 | -1.61  | 0.13952 | 0.278 | -5.33 | 0.87773 | none       |
| RAPSN     | 0.246  | 0.1628  | 1.6094 | 0.13969 | 0.279 | -5.33 | -0.7329 | none       |
| TMEM121   | 0.174  | 0.1704  | 1.6087 | 0.13986 | 0.279 | -5.34 | -0.0484 | none       |
| TXLNA     | 0.367  | 0.4495  | 1.6083 | 0.13994 | 0.279 | -5.34 | -0.5461 | none       |
| NME4      | 0.18   | 0.0711  | 1.6082 | 0.13997 | 0.279 | -5.34 | 0.40889 | none       |
| UBAP1     | 0.125  | 0.0929  | 1.6081 | 0.13998 | 0.279 | -5.34 | -1.0656 | none       |
| DOCK11    | 0.548  | 0.5055  | 1.6081 | 0.13999 | 0.279 | -5.34 | -0.2294 | none       |
| TLN2      | 0.523  | 0.5858  | 1.6077 | 0.14007 | 0.279 | -5.34 | 0.04354 | none       |
| TMEM125   | -0.159 | -0.1335 | -1.607 | 0.14017 | 0.28  | -5.34 | -0.1476 | none       |
| SLC41A3   | 0.231  | 0.1248  | 1.6071 | 0.1402  | 0.28  | -5.34 | -0.7185 | none       |
| RHEB      | -0.185 | -0.2013 | -1.607 | 0.14021 | 0.28  | -5.34 | 0.75727 | none       |
| ABT1      | -0.168 | -0.144  | -1.607 | 0.14023 | 0.28  | -5.34 | 0.9625  | none       |
| MC2R      | 0.109  | 0.0804  | 1.6069 | 0.14025 | 0.28  | -5.34 | 0.14857 | none       |

|          |        |         |        |         |       |       |         |      |
|----------|--------|---------|--------|---------|-------|-------|---------|------|
| MTA1     | 0.432  | 0.5349  | 1.6063 | 0.14037 | 0.28  | -5.34 | -0.4944 | none |
| SMARCA5  | 0.513  | 0.5967  | 1.6062 | 0.1404  | 0.28  | -5.34 | -0.2089 | none |
| UBQLN1   | 0.261  | 0.2798  | 1.6048 | 0.14071 | 0.28  | -5.34 | 0.24789 | none |
| MBP      | 0.175  | 0.1114  | 1.6047 | 0.14074 | 0.28  | -5.34 | -0.0284 | none |
| LGALS14  | -0.174 | -0.2068 | -1.605 | 0.14074 | 0.28  | -5.34 | 1.25013 | none |
| ZSCAN5C  | 0.191  | 0.1292  | 1.6044 | 0.14081 | 0.28  | -5.34 | -0.9346 | none |
| SPHK2    | 0.144  | 0.1085  | 1.6038 | 0.14093 | 0.281 | -5.34 | -0.8446 | none |
| SLC25A5  | -0.221 | -0.213  | -1.604 | 0.14099 | 0.281 | -5.34 | 0.25591 | none |
| NOM1     | 0.431  | 0.4767  | 1.6033 | 0.14103 | 0.281 | -5.34 | -0.4756 | none |
| PI4KB    | 0.169  | 0.1702  | 1.6031 | 0.14109 | 0.281 | -5.34 | 0.57065 | none |
| HIST3H3  | 0.3    | 0.237   | 1.6027 | 0.14118 | 0.281 | -5.34 | -1.2638 | none |
| KCNN4    | 0.163  | 0.2246  | 1.6027 | 0.14118 | 0.281 | -5.34 | 0.2878  | none |
| ZNF720   | -0.38  | -0.3292 | -1.603 | 0.14119 | 0.281 | -5.34 | 0.16935 | none |
| KAZN     | 0.132  | 0.0784  | 1.6026 | 0.1412  | 0.281 | -5.34 | -0.5414 | none |
| GABRE    | -0.117 | -0.0797 | -1.602 | 0.14127 | 0.281 | -5.34 | -0.3036 | none |
| SLC30A10 | 0.124  | 0.0917  | 1.6018 | 0.14138 | 0.281 | -5.34 | -0.7064 | none |
| VBP1     | -0.217 | -0.2387 | -1.601 | 0.14156 | 0.282 | -5.35 | 1.51693 | none |
| BZW1     | -0.18  | -0.1827 | -1.601 | 0.14164 | 0.282 | -5.35 | 1.25506 | none |
| AP001888 | 0.151  | 0.1512  | 1.6004 | 0.14169 | 0.282 | -5.35 | -0.4344 | none |
| NELFCD   | 0.13   | 0.1011  | 1.6001 | 0.14174 | 0.282 | -5.35 | 0.34425 | none |
| MED27    | 0.238  | 0.1003  | 1.6    | 0.14178 | 0.282 | -5.35 | -0.3034 | none |
| APEX2    | 0.145  | 0.1577  | 1.6    | 0.14178 | 0.282 | -5.35 | -0.8226 | none |
| SRBD1    | 0.213  | 0.1765  | 1.599  | 0.142   | 0.282 | -5.35 | 0.15591 | none |
| NDUFS8   | 0.253  | 0.1481  | 1.5983 | 0.14216 | 0.283 | -5.35 | -0.8587 | none |
| COQ9     | 0.147  | 0.1535  | 1.5981 | 0.14219 | 0.283 | -5.35 | 0.16853 | none |
| FYN      | -0.372 | -0.2154 | -1.598 | 0.14226 | 0.283 | -5.35 | 1.61899 | none |
| RRBP1    | 0.432  | 0.5506  | 1.5974 | 0.14234 | 0.283 | -5.35 | -0.1784 | none |
| TMEM106  | -0.186 | -0.1918 | -1.596 | 0.14256 | 0.283 | -5.35 | 1.96214 | none |
| TNFRSF4  | -0.198 | -0.1626 | -1.596 | 0.14259 | 0.283 | -5.35 | 1.3063  | none |
| DPPA2    | 0.167  | 0.1208  | 1.5962 | 0.14262 | 0.283 | -5.35 | -0.8497 | none |
| GPM6B    | 0.21   | 0.1456  | 1.596  | 0.14267 | 0.283 | -5.35 | -0.9967 | none |
| ZNF398   | 0.304  | 0.332   | 1.5957 | 0.14274 | 0.283 | -5.35 | -0.232  | none |
| PSENE1   | -0.199 | -0.2815 | -1.596 | 0.14275 | 0.283 | -5.35 | 1.66201 | none |
| TMEM198  | 0.265  | 0.1983  | 1.5953 | 0.14281 | 0.284 | -5.35 | -0.4046 | none |
| ZFX      | 0.337  | 0.3195  | 1.5947 | 0.14295 | 0.284 | -5.35 | 0.26833 | none |
| NUDT14   | 0.291  | 0.1291  | 1.5947 | 0.14295 | 0.284 | -5.35 | -0.28   | none |
| PARD6A   | -0.276 | -0.2603 | -1.595 | 0.14299 | 0.284 | -5.35 | 1.75543 | none |
| R3HCC1   | -0.15  | -0.115  | -1.594 | 0.143   | 0.284 | -5.35 | 0.88453 | none |
| MRPL34   | -0.249 | -0.2137 | -1.594 | 0.14301 | 0.284 | -5.35 | 1.8276  | none |
| LHPP     | 0.203  | 0.2109  | 1.5939 | 0.14314 | 0.284 | -5.36 | -0.3795 | none |



|          |        |         |        |         |       |       |         |      |
|----------|--------|---------|--------|---------|-------|-------|---------|------|
| PIH1D1   | -0.184 | -0.1936 | -1.593 | 0.14326 | 0.284 | -5.36 | 0.37071 | none |
| ZHX2     | 0.323  | 0.3743  | 1.5932 | 0.14329 | 0.284 | -5.36 | -0.2336 | none |
| LARP4    | 0.285  | 0.2924  | 1.593  | 0.14332 | 0.284 | -5.36 | -0.7864 | none |
| MFSD4A   | 0.224  | 0.1161  | 1.5929 | 0.14336 | 0.284 | -5.36 | -0.6379 | none |
| MT-ND2   | 0.309  | 0.2781  | 1.5925 | 0.14344 | 0.284 | -5.36 | 0.01004 | none |
| HIPK1    | 0.226  | 0.2318  | 1.5923 | 0.14348 | 0.284 | -5.36 | 0.23928 | none |
| KLHL7    | 0.263  | 0.1698  | 1.5922 | 0.1435  | 0.284 | -5.36 | -0.4102 | none |
| BLOC1S5  | 0.252  | 0.1432  | 1.592  | 0.14356 | 0.285 | -5.36 | 0.53705 | none |
| C10ORF90 | -0.154 | -0.1399 | -1.592 | 0.14358 | 0.285 | -5.36 | 0.49803 | none |
| RIIAD1   | 0.283  | 0.2928  | 1.5916 | 0.14364 | 0.285 | -5.36 | 0.02034 | none |
| TUBA4B   | 0.147  | 0.0241  | 1.5911 | 0.14375 | 0.285 | -5.36 | -0.8766 | none |
| C4ORF3   | -0.228 | -0.2705 | -1.591 | 0.14376 | 0.285 | -5.36 | 1.43519 | none |
| EMX1     | 0.199  | 0.1893  | 1.5908 | 0.14383 | 0.285 | -5.36 | 0.7682  | none |
| ATP9A    | 0.186  | 0.2023  | 1.5908 | 0.14383 | 0.285 | -5.36 | 0.18918 | none |
| ZBTB17   | 0.275  | 0.3539  | 1.5907 | 0.14384 | 0.285 | -5.36 | -0.3155 | none |
| TMEM97   | 0.159  | 0.0943  | 1.5903 | 0.14394 | 0.285 | -5.36 | -0.1969 | none |
| CHAC1    | -0.23  | -0.1982 | -1.59  | 0.14408 | 0.285 | -5.36 | 1.25261 | none |
| DBP      | 0.358  | 0.1957  | 1.5896 | 0.14409 | 0.285 | -5.36 | -0.905  | none |
| FAM200A  | 0.162  | 0.1026  | 1.5893 | 0.14416 | 0.285 | -5.36 | -0.5338 | none |
| ZNF787   | -0.279 | -0.1806 | -1.588 | 0.14435 | 0.286 | -5.36 | 1.48057 | none |
| LIN7C    | 0.255  | 0.1494  | 1.5884 | 0.14436 | 0.286 | -5.36 | -0.5532 | none |
| EIF4G2   | 0.333  | 0.3774  | 1.5882 | 0.14442 | 0.286 | -5.36 | -0.1573 | none |
| AKAP8    | 0.309  | 0.3982  | 1.5878 | 0.1445  | 0.286 | -5.36 | -0.0322 | none |
| SSPN     | 0.222  | 0.1917  | 1.5872 | 0.14464 | 0.286 | -5.36 | -1.1733 | none |
| SHISA4   | 0.127  | 0.1205  | 1.5869 | 0.1447  | 0.286 | -5.36 | 0.46856 | none |
| RAX2     | 0.165  | 0.1118  | 1.5869 | 0.14471 | 0.286 | -5.37 | -1.0876 | none |
| MAML2    | 0.301  | 0.3498  | 1.5867 | 0.14475 | 0.286 | -5.37 | -0.1396 | none |
| SMAD3    | -0.277 | -0.2024 | -1.587 | 0.14478 | 0.286 | -5.37 | 0.59551 | none |
| TTL5     | 0.366  | 0.4188  | 1.5863 | 0.14483 | 0.286 | -5.37 | -0.0122 | none |
| KIF16B   | 0.309  | 0.3703  | 1.5862 | 0.14487 | 0.286 | -5.37 | -0.0972 | none |
| OLFM1    | 0.15   | 0.1122  | 1.586  | 0.14492 | 0.286 | -5.37 | 1.27165 | none |
| CLDN7    | 0.346  | 0.2172  | 1.586  | 0.14492 | 0.286 | -5.37 | -0.5601 | none |
| SART1    | 0.511  | 0.5562  | 1.5853 | 0.14506 | 0.287 | -5.37 | -0.8253 | none |
| NEK6     | -0.177 | -0.1079 | -1.585 | 0.1451  | 0.287 | -5.37 | 1.54266 | none |
| GTF3C6   | -0.145 | -0.1335 | -1.585 | 0.14513 | 0.287 | -5.37 | 0.18504 | none |
| NAT8     | -0.152 | -0.1014 | -1.585 | 0.14523 | 0.287 | -5.37 | 0.86195 | none |
| ANP32E   | 0.282  | 0.2696  | 1.5846 | 0.14524 | 0.287 | -5.37 | -0.9754 | none |
| DIP2B    | 0.31   | 0.2818  | 1.5844 | 0.14528 | 0.287 | -5.37 | -1.0537 | none |
| METTL25  | 0.29   | 0.2203  | 1.5842 | 0.14532 | 0.287 | -5.37 | 0.39005 | none |
| ZNF146   | 0.479  | 0.5423  | 1.5835 | 0.14547 | 0.287 | -5.37 | 0.18638 | none |

|          |        |         |        |         |       |       |         |            |
|----------|--------|---------|--------|---------|-------|-------|---------|------------|
| AC010655 | -0.152 | -0.1012 | -1.583 | 0.14551 | 0.287 | -5.37 | 1.24897 | none       |
| SPATA18  | -0.153 | -0.159  | -1.583 | 0.14551 | 0.287 | -5.37 | 1.98912 | none       |
| FAM76B   | 0.273  | 0.2125  | 1.5833 | 0.14552 | 0.287 | -5.37 | -0.2879 | none       |
| SYT8     | -0.196 | -0.1637 | -1.583 | 0.14552 | 0.287 | -5.37 | 1.00409 | none       |
| DERL3    | -0.157 | -0.0677 | -1.583 | 0.14553 | 0.287 | -5.37 | 1.20935 | none       |
| GALNT8   | -0.106 | -0.0659 | -1.583 | 0.14557 | 0.287 | -5.37 | 1.43205 | none       |
| LAMA1    | 0.13   | 0.0786  | 1.583  | 0.14558 | 0.287 | -5.37 | -1.2269 | none       |
| ANXA2    | -0.135 | -0.1293 | -1.583 | 0.14559 | 0.287 | -5.37 | 1.26573 | none       |
| RIPPLY2  | -0.13  | -0.0629 | -1.583 | 0.14561 | 0.287 | -5.37 | 0.99292 | none       |
| EIF2AK2  | 0.337  | 0.3145  | 1.5826 | 0.14568 | 0.287 | -5.37 | -0.2056 | none       |
| MS4A5    | 0.4    | 0.2808  | 1.5826 | 0.14569 | 0.287 | -5.37 | -0.4236 | none       |
| CCNF     | 0.275  | 0.3224  | 1.5825 | 0.1457  | 0.287 | -5.37 | -0.1808 | none       |
| NPTN     | 0.174  | 0.1473  | 1.582  | 0.14583 | 0.288 | -5.37 | -0.5878 | none       |
| TNKS2    | 0.178  | 0.1687  | 1.5818 | 0.14588 | 0.288 | -5.37 | -0.1639 | none       |
| TSPAN18  | 0.152  | 0.1497  | 1.5817 | 0.14589 | 0.288 | -5.37 | -0.1511 | none       |
| AHCYL2   | -0.144 | -0.1074 | -1.582 | 0.1459  | 0.288 | -5.37 | 1.22514 | none       |
| NKAIN4   | -0.16  | -0.1341 | -1.581 | 0.14595 | 0.288 | -5.37 | -0.1935 | none       |
| TMCC2    | 0.222  | 0.224   | 1.5812 | 0.146   | 0.288 | -5.37 | -0.5208 | none       |
| SGTB     | 0.229  | 0.2478  | 1.5809 | 0.14606 | 0.288 | -5.37 | 0.4387  | none       |
| PDE5A    | 0.238  | 0.152   | 1.5808 | 0.14609 | 0.288 | -5.37 | 0.01674 | none       |
| CPLX2    | -0.27  | -0.1489 | -1.58  | 0.14623 | 0.288 | -5.37 | 0.26856 | none       |
| CRYL1    | -0.209 | -0.203  | -1.58  | 0.14625 | 0.288 | -5.37 | 0.71818 | none       |
| SLC5A12  | -0.11  | -0.069  | -1.58  | 0.14625 | 0.288 | -5.37 | 2.29375 | AA-related |
| STEAP3   | 0.166  | 0.1471  | 1.5801 | 0.14625 | 0.288 | -5.37 | -0.4597 | none       |
| KLF16    | -0.171 | -0.1131 | -1.58  | 0.14632 | 0.288 | -5.37 | 1.83943 | none       |
| RCL1     | 0.168  | 0.1038  | 1.5797 | 0.14633 | 0.288 | -5.37 | 0.56993 | none       |
| BATF     | -0.138 | -0.062  | -1.58  | 0.14635 | 0.288 | -5.37 | 0.51719 | none       |
| PLEKHF2  | 0.147  | 0.0549  | 1.5794 | 0.14642 | 0.288 | -5.38 | 0.13324 | none       |
| GRB7     | 0.195  | 0.1178  | 1.5793 | 0.14642 | 0.288 | -5.38 | 0.03098 | none       |
| SORBS2   | 0.248  | 0.1618  | 1.5792 | 0.14647 | 0.288 | -5.38 | -0.7844 | none       |
| USP5     | 0.257  | 0.3032  | 1.5789 | 0.14653 | 0.288 | -5.38 | -0.4304 | none       |
| DCAF5    | 0.268  | 0.3279  | 1.5787 | 0.14658 | 0.288 | -5.38 | -0.6179 | none       |
| CWC25    | 0.306  | 0.3072  | 1.5785 | 0.14661 | 0.288 | -5.38 | -0.2399 | none       |
| QSER1    | 0.403  | 0.4993  | 1.5783 | 0.14666 | 0.288 | -5.38 | 0.23719 | none       |
| SLC30A3  | 0.227  | 0.1543  | 1.5779 | 0.14675 | 0.289 | -5.38 | -0.3447 | none       |
| MMD      | 0.305  | 0.216   | 1.5778 | 0.14678 | 0.289 | -5.38 | 0.77584 | none       |
| NIFK     | -0.143 | -0.1644 | -1.578 | 0.14679 | 0.289 | -5.38 | 0.76593 | none       |
| VWF      | 0.183  | 0.1542  | 1.5773 | 0.14689 | 0.289 | -5.38 | -0.2083 | none       |
| BRD1     | 0.345  | 0.4371  | 1.5773 | 0.1469  | 0.289 | -5.38 | 0.14689 | none       |
| LRRC3C   | 0.246  | 0.1503  | 1.5771 | 0.14694 | 0.289 | -5.38 | -1.1999 | none       |

|           |        |         |        |         |       |       |         |            |
|-----------|--------|---------|--------|---------|-------|-------|---------|------------|
| GTF2A1    | -0.179 | -0.1996 | -1.577 | 0.14697 | 0.289 | -5.38 | 1.31625 | none       |
| ST8SIA3   | -0.151 | -0.1257 | -1.577 | 0.147   | 0.289 | -5.38 | 0.2123  | none       |
| ANGPTL6   | 0.225  | 0.2082  | 1.5768 | 0.14702 | 0.289 | -5.38 | -0.1974 | none       |
| METTTL11B | -0.15  | -0.1002 | -1.576 | 0.14712 | 0.289 | -5.38 | 0.63037 | none       |
| PLA1A     | -0.217 | -0.0791 | -1.576 | 0.14721 | 0.289 | -5.38 | -0.1225 | none       |
| ATP6V1H   | -0.201 | -0.1841 | -1.576 | 0.14724 | 0.289 | -5.38 | 1.66374 | none       |
| NCOA5     | -0.144 | -0.0938 | -1.576 | 0.14725 | 0.289 | -5.38 | -0.011  | none       |
| BRAP      | 0.35   | 0.4165  | 1.5755 | 0.1473  | 0.289 | -5.38 | -0.598  | none       |
| GRK2      | 0.258  | 0.2934  | 1.5747 | 0.14748 | 0.29  | -5.38 | -0.1911 | none       |
| STEAP1    | -0.182 | -0.2059 | -1.574 | 0.14754 | 0.29  | -5.38 | 0.6842  | none       |
| L3HYPDH   | 0.19   | 0.1677  | 1.5741 | 0.14764 | 0.29  | -5.38 | 0.34144 | none       |
| TM6SF1    | 0.158  | 0.0648  | 1.5735 | 0.14778 | 0.29  | -5.38 | 0.57502 | none       |
| SLC2A4RG  | 0.235  | 0.1763  | 1.571  | 0.14834 | 0.291 | -5.39 | 0.46743 | none       |
| KRTAP2-4  | 0.118  | 0.0996  | 1.571  | 0.14835 | 0.291 | -5.39 | -0.062  | none       |
| NLK       | -0.224 | -0.2437 | -1.571 | 0.14838 | 0.291 | -5.39 | 0.40893 | none       |
| FAM19A1   | 0.18   | 0.1088  | 1.5706 | 0.14843 | 0.291 | -5.39 | -1.1259 | none       |
| CYP20A1   | 0.216  | 0.01    | 1.5704 | 0.14849 | 0.291 | -5.39 | -0.5046 | none       |
| NKD1      | 0.181  | 0.1105  | 1.5701 | 0.14854 | 0.291 | -5.39 | -0.8569 | none       |
| MPV17L    | 0.21   | 0.0854  | 1.5699 | 0.14859 | 0.291 | -5.39 | 0.20845 | none       |
| USP25     | 0.372  | 0.3666  | 1.5698 | 0.14861 | 0.291 | -5.39 | 0.22775 | none       |
| SEC16A    | 0.4    | 0.5182  | 1.5698 | 0.14862 | 0.291 | -5.39 | -0.3492 | none       |
| PLA2G4D   | -0.189 | -0.11   | -1.57  | 0.14864 | 0.291 | -5.39 | 1.77994 | none       |
| ENHO      | -0.158 | -0.1312 | -1.569 | 0.14872 | 0.291 | -5.39 | 0.26761 | none       |
| POLD1     | 0.209  | 0.2538  | 1.5694 | 0.14872 | 0.291 | -5.39 | 0.35459 | none       |
| CCDC34    | 0.376  | 0.4267  | 1.5693 | 0.14873 | 0.291 | -5.39 | 0.17074 | none       |
| SLC35A4   | 0.144  | 0.1529  | 1.5692 | 0.14876 | 0.291 | -5.39 | 0.64136 | none       |
| ARHGAP29  | 0.21   | 0.2004  | 1.5691 | 0.14879 | 0.292 | -5.39 | -0.5879 | none       |
| PCMTD1    | 0.188  | 0.0746  | 1.5687 | 0.14887 | 0.292 | -5.39 | 0.13388 | none       |
| ANKRD26   | 0.35   | 0.3194  | 1.5686 | 0.14891 | 0.292 | -5.39 | 0.15086 | none       |
| DBNDD2    | -0.241 | -0.3297 | -1.569 | 0.14891 | 0.292 | -5.39 | 0.30885 | none       |
| CCDC124   | 0.246  | 0.2896  | 1.5684 | 0.14895 | 0.292 | -5.39 | -0.6974 | none       |
| FANCD2O1  | 0.85   | 0.6029  | 1.5673 | 0.1492  | 0.292 | -5.39 | -0.8921 | none       |
| ERP29     | 0.183  | 0.1184  | 1.5669 | 0.1493  | 0.292 | -5.39 | -0.9134 | none       |
| SP2       | 0.561  | 0.5539  | 1.5668 | 0.14932 | 0.292 | -5.39 | -0.658  | none       |
| ZNF250    | 0.246  | 0.2224  | 1.5668 | 0.14933 | 0.292 | -5.39 | 0.30118 | none       |
| S100A16   | 0.137  | 0.1389  | 1.5667 | 0.14934 | 0.292 | -5.39 | 0.60516 | none       |
| RAB5C     | 0.193  | 0.0932  | 1.5667 | 0.14934 | 0.292 | -5.39 | -0.0333 | none       |
| MAP3K5    | 0.388  | 0.4468  | 1.5667 | 0.14934 | 0.292 | -5.39 | 0.11564 | none       |
| SPDYE16   | -1.397 | -1.0166 | -1.567 | 0.14938 | 0.292 | -5.39 | 2.2645  | AA-related |
| ARSA      | 0.22   | 0.0854  | 1.5661 | 0.14948 | 0.292 | -5.39 | -0.0239 | none       |

|           |        |         |        |         |       |       |         |            |
|-----------|--------|---------|--------|---------|-------|-------|---------|------------|
| KEAP1     | 0.271  | 0.2476  | 1.566  | 0.1495  | 0.292 | -5.39 | -0.2277 | none       |
| AKR1E2    | 0.544  | 0.5015  | 1.5657 | 0.14957 | 0.293 | -5.39 | 0.83035 | none       |
| CNTN5     | 0.146  | 0.0995  | 1.5657 | 0.14958 | 0.293 | -5.39 | -1.3245 | none       |
| GABARAPI  | -0.217 | -0.2041 | -1.566 | 0.1496  | 0.293 | -5.39 | -0.2262 | none       |
| SPACA4    | -0.106 | -0.0917 | -1.565 | 0.14967 | 0.293 | -5.39 | -0.5051 | none       |
| C19ORF71  | -0.204 | -0.0856 | -1.565 | 0.14969 | 0.293 | -5.39 | 0.00963 | none       |
| GFOD1     | 0.217  | 0.2178  | 1.5652 | 0.14969 | 0.293 | -5.39 | -0.3837 | none       |
| KPNB1     | 0.526  | 0.652   | 1.5633 | 0.15013 | 0.293 | -5.4  | -0.582  | none       |
| GBF1      | 0.412  | 0.5475  | 1.5631 | 0.15018 | 0.293 | -5.4  | -0.3233 | none       |
| TTK       | 0.35   | 0.3163  | 1.5629 | 0.15023 | 0.294 | -5.4  | -0.309  | none       |
| RABGEF1   | 0.186  | 0.1643  | 1.5628 | 0.15025 | 0.294 | -5.4  | -0.5003 | none       |
| ADAM22    | 0.234  | 0.1775  | 1.5627 | 0.15027 | 0.294 | -5.4  | 0.04994 | none       |
| GSTT2B    | 0.148  | 0.1179  | 1.5626 | 0.1503  | 0.294 | -5.4  | 0.05897 | none       |
| LPAR6     | 0.213  | 0.1423  | 1.5622 | 0.15039 | 0.294 | -5.4  | -0.3728 | none       |
| SIT1      | -0.217 | -0.2152 | -1.562 | 0.1504  | 0.294 | -5.4  | 2.10714 | AA-related |
| PJA1      | -0.174 | -0.102  | -1.562 | 0.15052 | 0.294 | -5.4  | 1.38251 | none       |
| PITX1     | -0.162 | -0.1513 | -1.561 | 0.15057 | 0.294 | -5.4  | -0.1636 | none       |
| PPP1R3F   | -0.351 | -0.298  | -1.561 | 0.15059 | 0.294 | -5.4  | 0.80279 | none       |
| PLEKHS1   | 0.232  | 0.1336  | 1.5611 | 0.15065 | 0.294 | -5.4  | -1.1914 | none       |
| CEP57     | 0.301  | 0.2847  | 1.5609 | 0.15069 | 0.294 | -5.4  | 0.42851 | none       |
| TNFRSF10I | 0.159  | 0.221   | 1.5603 | 0.15084 | 0.294 | -5.4  | 0.68927 | none       |
| PRKDC     | 0.489  | 0.5712  | 1.5601 | 0.15089 | 0.294 | -5.4  | -0.0681 | none       |
| CORO7     | 0.294  | 0.2729  | 1.5591 | 0.15113 | 0.295 | -5.4  | -0.4557 | none       |
| CCDC183   | -0.31  | -0.2039 | -1.559 | 0.15113 | 0.295 | -5.4  | 1.10098 | none       |
| BCOR      | 0.348  | 0.5057  | 1.559  | 0.15115 | 0.295 | -5.4  | -0.6071 | none       |
| RPL18A    | -0.273 | -0.2798 | -1.559 | 0.15123 | 0.295 | -5.4  | 0.76148 | none       |
| KCNK1     | -0.2   | -0.21   | -1.558 | 0.15128 | 0.295 | -5.4  | 1.94844 | none       |
| AKAP14    | 0.487  | 0.2853  | 1.5583 | 0.15131 | 0.295 | -5.4  | -0.5179 | none       |
| KCNMB2    | 0.15   | 0.1692  | 1.5581 | 0.15136 | 0.295 | -5.4  | 0.2893  | none       |
| NTAN1     | 0.243  | 0.062   | 1.5577 | 0.15144 | 0.295 | -5.4  | -0.7509 | none       |
| PSMF1     | -0.123 | -0.115  | -1.557 | 0.15162 | 0.296 | -5.41 | 1.32348 | none       |
| DNMBP     | 0.272  | 0.2672  | 1.5564 | 0.15176 | 0.296 | -5.41 | -0.8568 | none       |
| PLK1      | -0.156 | -0.086  | -1.556 | 0.15177 | 0.296 | -5.41 | 0.7551  | none       |
| MRPL24    | -0.17  | -0.1391 | -1.556 | 0.1518  | 0.296 | -5.41 | 0.86255 | none       |
| FLRT2     | 0.248  | 0.1517  | 1.5559 | 0.15186 | 0.296 | -5.41 | -0.9284 | none       |
| SLFN12    | -0.172 | -0.1288 | -1.556 | 0.15194 | 0.296 | -5.41 | 1.68333 | none       |
| MTMR7     | 0.209  | 0.1218  | 1.5556 | 0.15194 | 0.296 | -5.41 | -0.8387 | none       |
| GNG8      | -0.58  | -0.3462 | -1.555 | 0.15207 | 0.296 | -5.41 | 2.09782 | AA-related |
| KIAA1324I | 0.459  | 0.3875  | 1.5548 | 0.15213 | 0.296 | -5.41 | -0.6985 | none       |
| CIC       | 0.387  | 0.4714  | 1.5544 | 0.15222 | 0.296 | -5.41 | -0.2187 | none       |

|          |        |         |        |         |       |       |         |      |
|----------|--------|---------|--------|---------|-------|-------|---------|------|
| ALAS2    | -0.139 | -0.112  | -1.554 | 0.1523  | 0.297 | -5.41 | -0.1996 | none |
| RIPK3    | 0.203  | 0.1862  | 1.5539 | 0.15235 | 0.297 | -5.41 | 0.57027 | none |
| SVOPL    | 0.152  | 0.156   | 1.5538 | 0.15237 | 0.297 | -5.41 | 0.66656 | none |
| PI4K2A   | -0.119 | -0.0441 | -1.554 | 0.15239 | 0.297 | -5.41 | 0.32248 | none |
| DDX58    | 0.203  | 0.1536  | 1.5535 | 0.15245 | 0.297 | -5.41 | 0.96759 | none |
| NECTIN3  | -0.26  | -0.2605 | -1.553 | 0.15249 | 0.297 | -5.41 | 1.94519 | none |
| PGBD1    | -0.168 | -0.096  | -1.552 | 0.15268 | 0.297 | -5.41 | 0.93417 | none |
| EMC10    | 0.219  | 0.0735  | 1.5524 | 0.15271 | 0.297 | -5.41 | -0.2103 | none |
| NHLRC4   | -0.172 | -0.1251 | -1.552 | 0.15284 | 0.297 | -5.41 | 1.38071 | none |
| RCCD1    | 0.192  | 0.072   | 1.5515 | 0.15292 | 0.297 | -5.41 | 0.62863 | none |
| UBA5     | 0.157  | 0.1563  | 1.5508 | 0.15308 | 0.298 | -5.41 | 0.62305 | none |
| LAMTOR5  | -0.216 | -0.242  | -1.551 | 0.1531  | 0.298 | -5.41 | 1.0979  | none |
| NOG      | 0.28   | 0.1764  | 1.5507 | 0.1531  | 0.298 | -5.41 | -0.6919 | none |
| WEE2     | 0.167  | 0.1923  | 1.5506 | 0.15313 | 0.298 | -5.41 | 0.77004 | none |
| PLEKHA8  | 0.23   | 0.2131  | 1.5504 | 0.15318 | 0.298 | -5.41 | -1.2176 | none |
| TMEM82   | -0.132 | -0.1321 | -1.55  | 0.15325 | 0.298 | -5.41 | 1.17573 | none |
| FARS2    | 0.144  | 0.0814  | 1.5499 | 0.15329 | 0.298 | -5.41 | 0.9347  | none |
| UQCC2    | -0.265 | -0.2321 | -1.55  | 0.15334 | 0.298 | -5.42 | 1.36637 | none |
| GRINA    | 0.188  | 0.1943  | 1.5496 | 0.15335 | 0.298 | -5.42 | -0.3589 | none |
| H2BFM    | 0.333  | 0.2508  | 1.5494 | 0.15341 | 0.298 | -5.42 | -0.7757 | none |
| LOXHD1   | 0.256  | 0.1717  | 1.5481 | 0.15373 | 0.299 | -5.42 | -0.1874 | none |
| UCP3     | 0.189  | 0.1533  | 1.548  | 0.15375 | 0.299 | -5.42 | -0.174  | none |
| PRKAR1B  | 0.147  | 0.145   | 1.5479 | 0.15376 | 0.299 | -5.42 | -0.6293 | none |
| ATF1     | 0.231  | 0.1417  | 1.5478 | 0.1538  | 0.299 | -5.42 | 1.48494 | none |
| NTRK1    | 0.231  | 0.2245  | 1.5477 | 0.15382 | 0.299 | -5.42 | 0.66292 | none |
| SRP72    | 0.366  | 0.3948  | 1.5471 | 0.15396 | 0.299 | -5.42 | 0.27428 | none |
| ZNF672   | 0.16   | 0.1441  | 1.5471 | 0.15397 | 0.299 | -5.42 | 0.72566 | none |
| NOMO3    | 0.209  | 0.193   | 1.5464 | 0.15414 | 0.299 | -5.42 | -0.7286 | none |
| DAPP1    | 0.207  | 0.1821  | 1.5454 | 0.15437 | 0.3   | -5.42 | -0.8999 | none |
| ANAPC2   | 0.243  | 0.281   | 1.5454 | 0.15438 | 0.3   | -5.42 | -0.5049 | none |
| KCNQ5    | -0.146 | -0.0387 | -1.545 | 0.15451 | 0.3   | -5.42 | 0.68108 | none |
| KNDC1    | 0.222  | 0.2304  | 1.5447 | 0.15453 | 0.3   | -5.42 | 1.08084 | none |
| TOMM20L  | 0.431  | 0.3168  | 1.5442 | 0.15465 | 0.3   | -5.42 | -0.7156 | none |
| ATF5     | -0.312 | -0.127  | -1.544 | 0.15465 | 0.3   | -5.42 | 1.7454  | none |
| PIK3IP1  | 0.169  | 0.1287  | 1.5437 | 0.15479 | 0.3   | -5.42 | 0.16926 | none |
| HIST1H3G | -0.175 | -0.1612 | -1.543 | 0.15492 | 0.3   | -5.42 | -0.1712 | none |
| STRN     | 0.256  | 0.301   | 1.5427 | 0.15501 | 0.301 | -5.42 | 0.82444 | none |
| S1PR4    | -0.192 | -0.2089 | -1.543 | 0.15503 | 0.301 | -5.42 | 0.65629 | none |
| DNAH11   | 0.45   | 0.5441  | 1.5423 | 0.15512 | 0.301 | -5.43 | -0.4364 | none |
| GNPDA1   | -0.187 | -0.1878 | -1.542 | 0.15527 | 0.301 | -5.43 | 1.54118 | none |

|          |        |         |        |         |       |       |         |            |
|----------|--------|---------|--------|---------|-------|-------|---------|------------|
| SCGB1A1  | -0.372 | -0.2949 | -1.542 | 0.1553  | 0.301 | -5.43 | 1.99986 | none       |
| SKIL     | 0.317  | 0.3386  | 1.5412 | 0.15537 | 0.301 | -5.43 | -0.6793 | none       |
| PPAN     | 0.201  | 0.2916  | 1.5408 | 0.15548 | 0.301 | -5.43 | -0.2186 | none       |
| RNF40    | 0.52   | 0.5806  | 1.5406 | 0.15553 | 0.301 | -5.43 | 0.06265 | none       |
| HIGD1C   | -0.228 | -0.2627 | -1.541 | 0.15554 | 0.301 | -5.43 | 0.05513 | none       |
| HMGCL    | 0.179  | 0.1093  | 1.5403 | 0.15561 | 0.301 | -5.43 | -0.8207 | none       |
| AKAP2    | 0.35   | 0.3945  | 1.5402 | 0.15561 | 0.301 | -5.43 | 0.4692  | none       |
| NDST2    | 0.221  | 0.2019  | 1.5402 | 0.15561 | 0.301 | -5.43 | -0.4762 | none       |
| C5ORF38  | 0.195  | 0.1304  | 1.5402 | 0.15561 | 0.301 | -5.43 | -0.3495 | none       |
| GNRH1    | 0.237  | 0.232   | 1.5396 | 0.15575 | 0.302 | -5.43 | 0.55469 | none       |
| GCDH     | 0.147  | 0.136   | 1.5394 | 0.1558  | 0.302 | -5.43 | 0.18651 | none       |
| HSPE1-MC | -0.395 | -0.4384 | -1.539 | 0.15583 | 0.302 | -5.43 | 1.76372 | none       |
| COX7A2L  | -0.275 | -0.3056 | -1.539 | 0.15585 | 0.302 | -5.43 | 1.24584 | none       |
| SH2D3C   | 0.297  | 0.3539  | 1.5392 | 0.15587 | 0.302 | -5.43 | -0.7169 | none       |
| MMP25    | 0.246  | 0.1928  | 1.5391 | 0.15589 | 0.302 | -5.43 | -0.4044 | none       |
| ADPGK    | 0.167  | 0.1023  | 1.5388 | 0.15597 | 0.302 | -5.43 | 0.79095 | none       |
| HS1BP3   | 0.2    | 0.1576  | 1.5386 | 0.15599 | 0.302 | -5.43 | 1.09155 | none       |
| MYO1G    | 0.291  | 0.3018  | 1.5381 | 0.15611 | 0.302 | -5.43 | -0.1672 | none       |
| SQLE     | 0.179  | 0.1443  | 1.5375 | 0.15628 | 0.302 | -5.43 | 0.52537 | none       |
| LEKR1    | -0.278 | -0.3409 | -1.537 | 0.15637 | 0.302 | -5.43 | 1.52853 | none       |
| ANAPC11  | -0.28  | -0.2638 | -1.537 | 0.15639 | 0.302 | -5.43 | 1.41718 | none       |
| KRT72    | 0.223  | 0.1741  | 1.5368 | 0.15643 | 0.302 | -5.43 | -1.0803 | none       |
| FN1      | 0.327  | 0.217   | 1.5367 | 0.15646 | 0.302 | -5.43 | -0.828  | none       |
| RNF215   | 0.168  | 0.2123  | 1.5359 | 0.15665 | 0.303 | -5.43 | -0.3016 | none       |
| ACAA2    | -0.196 | -0.1509 | -1.536 | 0.15667 | 0.303 | -5.43 | 2.44305 | AA-related |
| PGRMC2   | 0.267  | 0.1812  | 1.5357 | 0.1567  | 0.303 | -5.43 | -0.4541 | none       |
| SOCS1    | -0.224 | -0.1958 | -1.535 | 0.15684 | 0.303 | -5.43 | 0.96286 | none       |
| ZDHHC5   | 0.214  | 0.271   | 1.5348 | 0.15693 | 0.303 | -5.43 | 0.02557 | none       |
| CEP85L   | 0.196  | 0.2079  | 1.5347 | 0.15696 | 0.303 | -5.44 | -0.425  | none       |
| C2ORF49  | -0.199 | -0.1752 | -1.534 | 0.15705 | 0.303 | -5.44 | 0.47001 | none       |
| ALG10B   | 0.378  | 0.2495  | 1.5342 | 0.15707 | 0.303 | -5.44 | 0.03545 | none       |
| AAGAB    | -0.245 | -0.2402 | -1.534 | 0.15708 | 0.303 | -5.44 | 1.9938  | none       |
| FRG2C    | -0.131 | -0.1051 | -1.534 | 0.1571  | 0.303 | -5.44 | 0.59826 | none       |
| TOMM20   | -0.249 | -0.2964 | -1.534 | 0.15713 | 0.303 | -5.44 | 1.52292 | none       |
| TMEM203  | 0.31   | 0.2487  | 1.5336 | 0.15721 | 0.304 | -5.44 | 0.13822 | none       |
| FEM1B    | 0.314  | 0.1505  | 1.5335 | 0.15725 | 0.304 | -5.44 | -0.268  | none       |
| LRP4     | 0.252  | 0.265   | 1.5333 | 0.15728 | 0.304 | -5.44 | 0.5888  | none       |
| AREG     | -0.146 | -0.1051 | -1.533 | 0.15733 | 0.304 | -5.44 | 1.9519  | none       |
| NTN1     | -0.147 | -0.1386 | -1.533 | 0.15746 | 0.304 | -5.44 | 1.24347 | none       |
| AGRP     | 0.283  | 0.2077  | 1.5324 | 0.1575  | 0.304 | -5.44 | 0.13814 | none       |

|          |        |         |        |         |       |       |         |      |
|----------|--------|---------|--------|---------|-------|-------|---------|------|
| TBC1D31  | 0.298  | 0.1985  | 1.5324 | 0.15751 | 0.304 | -5.44 | -0.6646 | none |
| MATN4    | 0.14   | 0.1353  | 1.5321 | 0.15758 | 0.304 | -5.44 | 0.77575 | none |
| SMARCA2  | 0.369  | 0.4723  | 1.532  | 0.1576  | 0.304 | -5.44 | 0.32155 | none |
| HIST1H1B | -0.19  | -0.0768 | -1.532 | 0.15763 | 0.304 | -5.44 | 1.97538 | none |
| POT1     | -0.223 | -0.214  | -1.532 | 0.15766 | 0.304 | -5.44 | -0.0271 | none |
| GPRIN3   | 0.419  | 0.4535  | 1.5317 | 0.15768 | 0.304 | -5.44 | -0.1849 | none |
| CEP192   | 0.314  | 0.3864  | 1.5316 | 0.15771 | 0.304 | -5.44 | -0.3834 | none |
| S100A7A  | 0.17   | 0.1805  | 1.5314 | 0.15775 | 0.304 | -5.44 | -0.7173 | none |
| EXOC8    | 0.245  | 0.259   | 1.5314 | 0.15775 | 0.304 | -5.44 | -0.6746 | none |
| RPN2     | -0.15  | -0.1042 | -1.531 | 0.15775 | 0.304 | -5.44 | 1.59377 | none |
| NAGS     | -0.146 | -0.1344 | -1.531 | 0.15787 | 0.304 | -5.44 | 1.39832 | none |
| NAGLU    | 0.225  | 0.148   | 1.5305 | 0.15798 | 0.304 | -5.44 | -0.3939 | none |
| STAMBPL1 | 0.174  | 0.2099  | 1.53   | 0.15808 | 0.305 | -5.44 | 0.01703 | none |
| ITGB1BP1 | -0.171 | -0.1844 | -1.53  | 0.1581  | 0.305 | -5.44 | 1.25782 | none |
| MMP12    | -0.135 | -0.1375 | -1.53  | 0.15821 | 0.305 | -5.44 | 0.67564 | none |
| VPS37A   | 0.177  | 0.1688  | 1.5289 | 0.15837 | 0.305 | -5.44 | 0.77533 | none |
| KLC1     | 0.352  | 0.4337  | 1.5284 | 0.15848 | 0.305 | -5.44 | -0.26   | none |
| ECEL1    | -0.104 | -0.0843 | -1.528 | 0.15848 | 0.305 | -5.44 | 0.78088 | none |
| FPGT-TNN | 0.275  | 0.2617  | 1.5283 | 0.15851 | 0.305 | -5.44 | -0.0507 | none |
| PPCDC    | 0.201  | 0.223   | 1.5272 | 0.15878 | 0.306 | -5.45 | 1.03767 | none |
| TMEM219  | -0.303 | -0.3401 | -1.527 | 0.15879 | 0.306 | -5.45 | 1.76115 | none |
| UBL3     | 0.137  | 0.0883  | 1.5266 | 0.15894 | 0.306 | -5.45 | 0.27538 | none |
| JARID2   | 0.368  | 0.4736  | 1.5263 | 0.15899 | 0.306 | -5.45 | 0.07078 | none |
| DSCC1    | -0.166 | -0.1437 | -1.526 | 0.15915 | 0.306 | -5.45 | 1.72749 | none |
| CDYL     | 0.309  | 0.3642  | 1.5255 | 0.15919 | 0.306 | -5.45 | -1.0492 | none |
| AURKAIP1 | -0.211 | -0.1736 | -1.525 | 0.15925 | 0.306 | -5.45 | 1.00398 | none |
| DNAJC17  | -0.211 | -0.1493 | -1.525 | 0.15926 | 0.306 | -5.45 | -0.0147 | none |
| PIGQ     | 0.2    | 0.1799  | 1.5252 | 0.15926 | 0.306 | -5.45 | -0.4449 | none |
| CHST14   | -0.168 | -0.1359 | -1.525 | 0.15934 | 0.306 | -5.45 | 1.37781 | none |
| OTUD3    | 0.292  | 0.3159  | 1.5249 | 0.15935 | 0.306 | -5.45 | -0.5563 | none |
| RSPH1    | 0.203  | 0.1292  | 1.5247 | 0.15941 | 0.306 | -5.45 | 0.38271 | none |
| FKBP1B   | -0.154 | -0.1141 | -1.524 | 0.15967 | 0.307 | -5.45 | 0.99094 | none |
| ARHGAP4  | 0.21   | 0.2366  | 1.5235 | 0.1597  | 0.307 | -5.45 | 0.1923  | none |
| CTNS     | 0.134  | 0.0861  | 1.5232 | 0.15976 | 0.307 | -5.45 | 0.38451 | none |
| DNAJB5   | 0.21   | 0.2018  | 1.5232 | 0.15976 | 0.307 | -5.45 | 0.61171 | none |
| FOLR2    | -0.174 | -0.0873 | -1.523 | 0.15978 | 0.307 | -5.45 | 0.31145 | none |
| TNNC2    | 0.287  | 0.1827  | 1.5228 | 0.15986 | 0.307 | -5.45 | -0.5504 | none |
| GRIN3A   | -0.155 | -0.1274 | -1.522 | 0.16    | 0.307 | -5.45 | 1.89958 | none |
| PPP2R5A  | 0.147  | 0.1093  | 1.5221 | 0.16005 | 0.307 | -5.45 | -0.4668 | none |
| PACSIN3  | -0.264 | -0.2313 | -1.522 | 0.16012 | 0.308 | -5.45 | 0.88471 | none |

|           |        |         |        |         |       |       |         |      |
|-----------|--------|---------|--------|---------|-------|-------|---------|------|
| PIK3R3    | 0.2    | 0.0916  | 1.5211 | 0.16028 | 0.308 | -5.45 | 0.42701 | none |
| CBSL      | 0.241  | 0.2462  | 1.521  | 0.16031 | 0.308 | -5.45 | 1.06255 | none |
| AGBL5     | 0.231  | 0.228   | 1.5207 | 0.16039 | 0.308 | -5.45 | -0.6014 | none |
| RRP15     | -0.165 | -0.1257 | -1.52  | 0.1605  | 0.308 | -5.45 | 0.91727 | none |
| PDE7A     | 0.181  | 0.1718  | 1.5202 | 0.16051 | 0.308 | -5.45 | -0.6403 | none |
| LMO2      | -0.162 | -0.1047 | -1.52  | 0.16057 | 0.308 | -5.45 | 0.19882 | none |
| TMEM155   | 0.182  | 0.1738  | 1.5197 | 0.16063 | 0.308 | -5.46 | 0.00161 | none |
| KIAA0355  | 0.415  | 0.3912  | 1.5196 | 0.16067 | 0.308 | -5.46 | -0.7932 | none |
| YWHAQ     | -0.199 | -0.1737 | -1.52  | 0.16067 | 0.308 | -5.46 | 1.03412 | none |
| MLANA     | 0.384  | 0.3187  | 1.5195 | 0.16069 | 0.308 | -5.46 | -0.9035 | none |
| ABHD16B   | 0.212  | 0.1941  | 1.5193 | 0.16073 | 0.308 | -5.46 | 0.5708  | none |
| MAGED1    | 0.241  | 0.2457  | 1.5192 | 0.16076 | 0.308 | -5.46 | -0.2843 | none |
| CYFIP1    | 0.215  | 0.2752  | 1.5182 | 0.161   | 0.309 | -5.46 | -0.3029 | none |
| HIST1H2BI | -0.354 | -0.3517 | -1.518 | 0.1611  | 0.309 | -5.46 | 0.83973 | none |
| TM2D3     | -0.176 | -0.1935 | -1.518 | 0.16116 | 0.309 | -5.46 | 1.48543 | none |
| VASP      | 0.168  | 0.1084  | 1.5175 | 0.16119 | 0.309 | -5.46 | -0.9316 | none |
| PINX1     | -0.252 | -0.0497 | -1.517 | 0.16128 | 0.309 | -5.46 | 1.6541  | none |
| TTC17     | 0.341  | 0.3869  | 1.5169 | 0.16134 | 0.309 | -5.46 | -0.352  | none |
| TOPBP1    | 0.542  | 0.6068  | 1.5165 | 0.16143 | 0.309 | -5.46 | 0.09827 | none |
| CCNB1     | -0.149 | -0.1368 | -1.516 | 0.16146 | 0.309 | -5.46 | 0.28197 | none |
| KLK15     | 0.212  | 0.1586  | 1.5163 | 0.16148 | 0.309 | -5.46 | 0.74326 | none |
| CAPN11    | 0.116  | 0.1245  | 1.5161 | 0.16152 | 0.309 | -5.46 | -0.6293 | none |
| KRT85     | 0.167  | 0.1079  | 1.5161 | 0.16152 | 0.309 | -5.46 | -0.8096 | none |
| NOP14     | 0.563  | 0.7127  | 1.5159 | 0.16157 | 0.309 | -5.46 | 0.14573 | none |
| OGDHL     | -0.244 | -0.2426 | -1.516 | 0.16166 | 0.31  | -5.46 | 0.30767 | none |
| RPS6KB2   | -0.178 | -0.1546 | -1.515 | 0.16176 | 0.31  | -5.46 | 1.76447 | none |
| NDUFB7    | -0.247 | -0.2528 | -1.515 | 0.16176 | 0.31  | -5.46 | 1.49253 | none |
| CELSR3    | 0.273  | 0.319   | 1.5145 | 0.16192 | 0.31  | -5.46 | -0.5688 | none |
| VTA1      | -0.133 | -0.1547 | -1.514 | 0.16198 | 0.31  | -5.46 | 0.74204 | none |
| CFAP100   | 0.402  | 0.3464  | 1.5142 | 0.162   | 0.31  | -5.46 | 0.29247 | none |
| SLC16A6   | 0.228  | 0.0975  | 1.514  | 0.16205 | 0.31  | -5.46 | -0.4597 | none |
| ST7       | 0.169  | 0.1108  | 1.5139 | 0.16208 | 0.31  | -5.46 | -0.7294 | none |
| TENM4     | 0.15   | 0.1368  | 1.5138 | 0.16209 | 0.31  | -5.46 | 0.9154  | none |
| DIAPH1    | 0.333  | 0.3792  | 1.5138 | 0.1621  | 0.31  | -5.46 | -0.7298 | none |
| MRPS15    | -0.18  | -0.1854 | -1.514 | 0.16212 | 0.31  | -5.46 | 0.81487 | none |
| TIPIN     | 0.168  | 0.0736  | 1.5136 | 0.16215 | 0.31  | -5.46 | 0.3681  | none |
| PPIL4     | 0.256  | 0.2604  | 1.5134 | 0.16219 | 0.31  | -5.46 | 0.1496  | none |
| SAFB      | 0.452  | 0.5565  | 1.5131 | 0.16227 | 0.31  | -5.46 | -0.2519 | none |
| GTF2H2C   | 0.452  | 0.2333  | 1.5131 | 0.16227 | 0.31  | -5.46 | -0.6895 | none |
| SUCLG1    | -0.157 | -0.2056 | -1.513 | 0.16227 | 0.31  | -5.46 | 0.32778 | none |



|           |        |         |        |         |       |       |         |            |
|-----------|--------|---------|--------|---------|-------|-------|---------|------------|
| POLE2     | 0.279  | 0.103   | 1.5127 | 0.16238 | 0.31  | -5.46 | -0.2574 | none       |
| PDGFRB    | -0.174 | -0.149  | -1.513 | 0.16241 | 0.31  | -5.46 | -0.2555 | none       |
| DCP1A     | 0.223  | 0.244   | 1.5123 | 0.16249 | 0.311 | -5.46 | 0.27539 | none       |
| PABPC1L2  | 0.114  | 0.0908  | 1.5121 | 0.16254 | 0.311 | -5.47 | 0.88165 | none       |
| MRPS18A   | -0.141 | -0.1511 | -1.512 | 0.16257 | 0.311 | -5.47 | 1.5181  | none       |
| KLHL3     | -0.289 | -0.2181 | -1.511 | 0.1627  | 0.311 | -5.47 | 0.0197  | none       |
| MAPRE1    | -0.151 | -0.1641 | -1.511 | 0.16276 | 0.311 | -5.47 | 0.88942 | none       |
| FNDC8     | 0.165  | 0.1408  | 1.5107 | 0.16289 | 0.311 | -5.47 | 0.56387 | none       |
| TNF       | 0.721  | 0.6417  | 1.5103 | 0.16297 | 0.311 | -5.47 | 0.79868 | none       |
| KMO       | 0.289  | 0.2443  | 1.5096 | 0.16315 | 0.312 | -5.47 | 0.00365 | none       |
| FUT7      | 0.208  | 0.0798  | 1.5094 | 0.16321 | 0.312 | -5.47 | -0.6571 | none       |
| PARP4     | 0.339  | 0.3667  | 1.5093 | 0.16324 | 0.312 | -5.47 | -0.314  | none       |
| RPL13     | -0.242 | -0.2414 | -1.509 | 0.16329 | 0.312 | -5.47 | 1.60768 | none       |
| GPR1      | 0.158  | 0.1144  | 1.5088 | 0.16335 | 0.312 | -5.47 | 0.1628  | none       |
| MROH7-T1  | -0.361 | -0.2935 | -1.508 | 0.16345 | 0.312 | -5.47 | 1.50043 | none       |
| MALSU1    | -0.261 | -0.2457 | -1.508 | 0.16349 | 0.312 | -5.47 | 1.00488 | none       |
| NEK7      | 0.218  | 0.1516  | 1.5081 | 0.16353 | 0.312 | -5.47 | 0.6487  | none       |
| BTD       | -0.246 | -0.3098 | -1.508 | 0.1636  | 0.312 | -5.47 | 1.81904 | none       |
| IFNG      | -0.282 | -0.1905 | -1.507 | 0.1637  | 0.312 | -5.47 | 1.85424 | none       |
| FBXO7     | -0.202 | -0.2154 | -1.507 | 0.16373 | 0.312 | -5.47 | 2.22898 | AA-related |
| SPATC1L   | 0.134  | 0.0937  | 1.5072 | 0.16377 | 0.312 | -5.47 | 0.39013 | none       |
| NSUN7     | 0.219  | 0.2115  | 1.5071 | 0.16379 | 0.312 | -5.47 | -0.4016 | none       |
| PKD2      | 0.313  | 0.277   | 1.5067 | 0.16389 | 0.313 | -5.47 | -0.926  | none       |
| DNAJC2    | 0.366  | 0.4777  | 1.5065 | 0.16394 | 0.313 | -5.47 | -0.0749 | none       |
| AIMP2     | -0.194 | -0.2243 | -1.506 | 0.16394 | 0.313 | -5.47 | 1.39834 | none       |
| DTD1      | -0.136 | -0.1549 | -1.506 | 0.16395 | 0.313 | -5.47 | 0.91891 | none       |
| ARF6      | 0.181  | 0.1204  | 1.5064 | 0.16396 | 0.313 | -5.47 | -0.9667 | none       |
| GRIN2C    | -0.168 | -0.1332 | -1.506 | 0.16397 | 0.313 | -5.47 | 1.11577 | none       |
| GPR75-ASI | -0.295 | -0.1622 | -1.506 | 0.16402 | 0.313 | -5.47 | 0.36498 | none       |
| NOLC1     | 0.595  | 0.7087  | 1.5056 | 0.16415 | 0.313 | -5.47 | -0.1608 | none       |
| CCDC141   | 0.244  | 0.2444  | 1.5056 | 0.16416 | 0.313 | -5.47 | -0.3381 | none       |
| SERBP1    | -0.15  | -0.0571 | -1.506 | 0.16418 | 0.313 | -5.47 | 1.6944  | none       |
| TXN2      | -0.148 | -0.1411 | -1.506 | 0.16418 | 0.313 | -5.47 | 1.18619 | none       |
| ZDHHC7    | 0.407  | 0.5002  | 1.5053 | 0.16423 | 0.313 | -5.47 | 0.62806 | none       |
| TCAF1     | 0.347  | 0.4039  | 1.5053 | 0.16425 | 0.313 | -5.47 | -0.0499 | none       |
| DPM2      | -0.123 | -0.0796 | -1.505 | 0.16429 | 0.313 | -5.47 | 0.47134 | none       |
| MRPS30    | 0.117  | 0.076   | 1.5051 | 0.16429 | 0.313 | -5.47 | -0.8658 | none       |
| GPM6A     | 0.207  | 0.1378  | 1.5047 | 0.16439 | 0.313 | -5.47 | -0.1292 | none       |
| CALB2     | 0.13   | 0.1296  | 1.5045 | 0.16443 | 0.313 | -5.47 | 0.80662 | none       |
| SFR1      | 0.208  | 0.1102  | 1.5042 | 0.16452 | 0.313 | -5.48 | -0.6456 | none       |

|           |        |         |        |         |       |       |         |      |
|-----------|--------|---------|--------|---------|-------|-------|---------|------|
| TMEM237   | -0.167 | -0.1858 | -1.504 | 0.16459 | 0.313 | -5.48 | 0.76346 | none |
| COX6A1    | -0.185 | -0.2054 | -1.504 | 0.16463 | 0.313 | -5.48 | 1.85654 | none |
| GLB1L2    | 0.258  | 0.2546  | 1.5037 | 0.16463 | 0.313 | -5.48 | 0.57756 | none |
| AGPS      | 0.227  | 0.1871  | 1.5037 | 0.16464 | 0.313 | -5.48 | -0.5611 | none |
| TPM4      | 0.257  | 0.2296  | 1.5036 | 0.16467 | 0.313 | -5.48 | -0.3479 | none |
| GATB      | -0.137 | -0.0645 | -1.503 | 0.16474 | 0.313 | -5.48 | 1.10957 | none |
| CADM1     | 0.42   | 0.3451  | 1.5028 | 0.16487 | 0.314 | -5.48 | -1.1046 | none |
| MXI1      | 0.257  | 0.2329  | 1.5028 | 0.16487 | 0.314 | -5.48 | 1.01788 | none |
| LSG1      | 0.359  | 0.3895  | 1.5026 | 0.16493 | 0.314 | -5.48 | -0.5254 | none |
| HIST1H2BI | 0.194  | 0.015   | 1.5024 | 0.16497 | 0.314 | -5.48 | -0.5787 | none |
| RASSF3    | 0.18   | 0.1126  | 1.502  | 0.16507 | 0.314 | -5.48 | 1.09267 | none |
| MED29     | 0.23   | 0.217   | 1.5017 | 0.16515 | 0.314 | -5.48 | -0.8599 | none |
| EIF1B     | -0.215 | -0.2848 | -1.501 | 0.16524 | 0.314 | -5.48 | 1.70033 | none |
| FGFBP3    | 0.127  | 0.1007  | 1.501  | 0.16534 | 0.314 | -5.48 | 1.21869 | none |
| SLC10A7   | 0.158  | 0.0928  | 1.5009 | 0.16535 | 0.314 | -5.48 | -0.3499 | none |
| HIST1H3F  | -0.434 | -0.4803 | -1.501 | 0.16537 | 0.314 | -5.48 | 1.72867 | none |
| PHKG2     | 0.167  | 0.1552  | 1.5008 | 0.16538 | 0.314 | -5.48 | -0.2936 | none |
| TRMU      | 0.142  | 0.163   | 1.5003 | 0.16551 | 0.314 | -5.48 | -0.17   | none |
| SERPING1  | 0.137  | 0.1458  | 1.5    | 0.16557 | 0.314 | -5.48 | 1.46374 | none |
| OCM       | -0.18  | -0.1691 | -1.5   | 0.16558 | 0.314 | -5.48 | 1.6827  | none |
| MYOZ1     | 0.142  | 0.0927  | 1.5    | 0.16559 | 0.314 | -5.48 | -1.264  | none |
| SLC30A9   | -0.115 | -0.1106 | -1.5   | 0.1656  | 0.314 | -5.48 | 1.92307 | none |
| PROC      | -0.187 | -0.1314 | -1.5   | 0.16561 | 0.314 | -5.48 | 0.78772 | none |
| UBQLNL    | 0.122  | 0.0892  | 1.4999 | 0.16562 | 0.314 | -5.48 | -0.5937 | none |
| APPL2     | 0.299  | 0.3664  | 1.4997 | 0.16566 | 0.314 | -5.48 | 0.2402  | none |
| CYP4F2    | -0.178 | -0.1392 | -1.499 | 0.16584 | 0.315 | -5.48 | -0.1178 | none |
| SHH       | -0.162 | -0.1677 | -1.499 | 0.1659  | 0.315 | -5.48 | 1.20019 | none |
| TMEM35A   | 0.125  | 0.1245  | 1.4982 | 0.16604 | 0.315 | -5.48 | 0.31786 | none |
| TADA1     | -0.174 | -0.1937 | -1.498 | 0.16616 | 0.315 | -5.48 | 0.59329 | none |
| NOL8      | 0.429  | 0.498   | 1.4975 | 0.16622 | 0.315 | -5.48 | -0.5386 | none |
| SLC2A3    | 0.17   | 0.0859  | 1.4975 | 0.16623 | 0.315 | -5.48 | 0.23888 | none |
| CDKN3     | -0.234 | -0.2809 | -1.497 | 0.1663  | 0.315 | -5.48 | 0.45602 | none |
| RTKN      | 0.204  | 0.1707  | 1.4968 | 0.16639 | 0.316 | -5.49 | -0.6066 | none |
| PRH1      | 0.352  | 0.245   | 1.4966 | 0.16646 | 0.316 | -5.49 | 0.12211 | none |
| PLK2      | 0.22   | 0.3072  | 1.4964 | 0.1665  | 0.316 | -5.49 | 1.37889 | none |
| OR6C76    | 0.127  | 0.1273  | 1.4959 | 0.16663 | 0.316 | -5.49 | -0.0353 | none |
| POC1B-GA  | -0.2   | -0.191  | -1.496 | 0.16672 | 0.316 | -5.49 | 1.09506 | none |
| HRK       | 0.176  | 0.0884  | 1.4952 | 0.16682 | 0.316 | -5.49 | 0.04965 | none |
| NUDT12    | 0.166  | 0.1208  | 1.495  | 0.16685 | 0.316 | -5.49 | 0.26709 | none |
| SLC37A1   | -0.258 | -0.1548 | -1.495 | 0.16687 | 0.316 | -5.49 | 1.07739 | none |

|          |        |         |        |         |       |       |         |      |
|----------|--------|---------|--------|---------|-------|-------|---------|------|
| ULBP1    | 0.104  | 0.0723  | 1.4949 | 0.16689 | 0.316 | -5.49 | -0.5767 | none |
| AHCYL1   | 0.21   | 0.1815  | 1.4947 | 0.16694 | 0.316 | -5.49 | -0.4109 | none |
| CYP26B1  | 0.13   | 0.1305  | 1.4945 | 0.16698 | 0.316 | -5.49 | -0.5049 | none |
| ERMP1    | -0.133 | -0.1034 | -1.495 | 0.16699 | 0.316 | -5.49 | 1.52215 | none |
| KRI1     | 0.423  | 0.5234  | 1.4942 | 0.16707 | 0.316 | -5.49 | -0.2659 | none |
| SFMBT2   | 0.272  | 0.2782  | 1.4931 | 0.16734 | 0.317 | -5.49 | 0.0069  | none |
| BEST3    | -0.309 | -0.2211 | -1.492 | 0.16759 | 0.317 | -5.49 | 1.11096 | none |
| PPP5C    | 0.209  | 0.2415  | 1.4917 | 0.1677  | 0.317 | -5.49 | 0.18845 | none |
| ZNF184   | 0.23   | 0.2008  | 1.4915 | 0.16777 | 0.318 | -5.49 | -0.2845 | none |
| DHRS4L2  | -0.15  | -0.1806 | -1.491 | 0.16785 | 0.318 | -5.49 | 0.75731 | none |
| PARP3    | 0.283  | 0.2834  | 1.4907 | 0.16796 | 0.318 | -5.49 | -0.0805 | none |
| CCR7     | 0.171  | 0.1682  | 1.4906 | 0.168   | 0.318 | -5.49 | -0.046  | none |
| MT1F     | -0.373 | -0.4121 | -1.49  | 0.16802 | 0.318 | -5.49 | 1.0846  | none |
| TLR2     | 0.175  | 0.1543  | 1.4903 | 0.16807 | 0.318 | -5.49 | 0.2516  | none |
| ATP6V1G2 | 0.162  | 0.1293  | 1.4897 | 0.16823 | 0.318 | -5.49 | -0.5088 | none |
| ANAPC16  | 0.182  | 0.0303  | 1.4895 | 0.16829 | 0.318 | -5.49 | -0.0925 | none |
| NDE1     | 0.449  | 0.4658  | 1.489  | 0.16841 | 0.318 | -5.5  | 0.0346  | none |
| MTO1     | 0.221  | 0.1578  | 1.489  | 0.16842 | 0.318 | -5.5  | -0.9232 | none |
| C5ORF34  | -0.174 | -0.1522 | -1.487 | 0.16881 | 0.319 | -5.5  | 1.66666 | none |
| ATRX     | 0.445  | 0.5526  | 1.4872 | 0.16888 | 0.319 | -5.5  | -0.1329 | none |
| MSH2     | 0.257  | 0.2542  | 1.487  | 0.16892 | 0.319 | -5.5  | 1.19553 | none |
| HIST1H2A | 0.508  | 0.3782  | 1.4869 | 0.16894 | 0.319 | -5.5  | 0.5601  | none |
| ILDR2    | 0.207  | 0.2043  | 1.4869 | 0.16895 | 0.319 | -5.5  | 0.77043 | none |
| OR1Q1    | 0.119  | 0.0968  | 1.4867 | 0.16901 | 0.319 | -5.5  | 0.59825 | none |
| PSRC1    | -0.222 | -0.1314 | -1.487 | 0.16905 | 0.319 | -5.5  | 0.64618 | none |
| FHL1     | 0.198  | 0.1254  | 1.4857 | 0.16926 | 0.32  | -5.5  | 0.97195 | none |
| SPRED1   | 0.232  | 0.1809  | 1.4851 | 0.16941 | 0.32  | -5.5  | -0.3481 | none |
| SPIN1    | 0.166  | 0.0502  | 1.485  | 0.16944 | 0.32  | -5.5  | 0.06565 | none |
| TRMT1L   | 0.234  | 0.2631  | 1.4847 | 0.16952 | 0.32  | -5.5  | -0.0658 | none |
| KLF9     | 0.168  | 0.1388  | 1.4846 | 0.16955 | 0.32  | -5.5  | -0.4528 | none |
| HRASLS   | -0.17  | -0.1958 | -1.484 | 0.16981 | 0.321 | -5.5  | 1.68861 | none |
| CNIH3    | 0.179  | 0.1566  | 1.4831 | 0.16993 | 0.321 | -5.5  | -0.4124 | none |
| MRPL45   | -0.518 | -0.3775 | -1.483 | 0.17007 | 0.321 | -5.5  | 0.33533 | none |
| CLEC3B   | -0.123 | -0.0901 | -1.482 | 0.17013 | 0.321 | -5.5  | 1.03225 | none |
| BICD1    | 0.241  | 0.2665  | 1.4822 | 0.17018 | 0.321 | -5.5  | 0.34532 | none |
| PPP2R2B  | 0.221  | 0.168   | 1.4822 | 0.17018 | 0.321 | -5.5  | -0.6243 | none |
| TBC1D10A | -0.156 | -0.1456 | -1.482 | 0.1702  | 0.321 | -5.5  | 2.07367 | none |
| KLHL12   | -0.12  | -0.1205 | -1.482 | 0.17027 | 0.321 | -5.5  | 1.86251 | none |
| FUCA1    | -0.159 | -0.14   | -1.482 | 0.17029 | 0.321 | -5.5  | 0.47888 | none |
| MT-CO1   | 0.142  | 0.1079  | 1.4817 | 0.17031 | 0.321 | -5.5  | 0.65161 | none |

|         |        |         |        |         |       |       |         |      |
|---------|--------|---------|--------|---------|-------|-------|---------|------|
| DNAI2   | -0.096 | -0.0682 | -1.482 | 0.17035 | 0.321 | -5.51 | 1.88228 | none |
| APRT    | -0.227 | -0.2249 | -1.481 | 0.17039 | 0.321 | -5.51 | 2.00154 | none |
| SPANXN3 | 0.135  | 0.0901  | 1.4814 | 0.17039 | 0.321 | -5.51 | 0.20876 | none |
| PWWP2B  | 0.164  | 0.1346  | 1.4812 | 0.17042 | 0.321 | -5.51 | -1.1408 | none |
| MPHOSPH | 0.447  | 0.4965  | 1.481  | 0.17049 | 0.321 | -5.51 | -0.6169 | none |
| UNC93B1 | 0.25   | 0.1751  | 1.4798 | 0.17079 | 0.322 | -5.51 | 0.10283 | none |
| CCNA2   | -0.157 | -0.1644 | -1.48  | 0.17081 | 0.322 | -5.51 | 1.6836  | none |
| BRD3    | 0.287  | 0.2701  | 1.4797 | 0.17082 | 0.322 | -5.51 | -0.7407 | none |
| STON2   | 0.263  | 0.2385  | 1.4796 | 0.17085 | 0.322 | -5.51 | -0.9818 | none |
| HSPB7   | -0.155 | -0.1173 | -1.48  | 0.17086 | 0.322 | -5.51 | 1.09674 | none |
| BAK1    | -0.159 | -0.1775 | -1.479 | 0.17089 | 0.322 | -5.51 | 1.8048  | none |
| GLIPR2  | -0.162 | -0.2097 | -1.479 | 0.17099 | 0.322 | -5.51 | 0.25158 | none |
| KLK6    | -0.117 | -0.0868 | -1.479 | 0.17102 | 0.322 | -5.51 | 0.49785 | none |
| PDAP1   | 0.27   | 0.3285  | 1.4784 | 0.17118 | 0.322 | -5.51 | 0.09268 | none |
| NOSIP   | -0.167 | -0.1511 | -1.477 | 0.17141 | 0.323 | -5.51 | 1.54993 | none |
| POTEG   | 0.177  | 0.1456  | 1.477  | 0.17155 | 0.323 | -5.51 | -0.9753 | none |
| LRP1    | 0.235  | 0.1743  | 1.4766 | 0.17165 | 0.323 | -5.51 | -0.766  | none |
| VPS25   | -0.199 | -0.219  | -1.476 | 0.17167 | 0.323 | -5.51 | 1.32198 | none |
| ZNF80   | 0.182  | 0.1309  | 1.476  | 0.17178 | 0.323 | -5.51 | 0.94554 | none |
| GPR143  | -0.118 | -0.0928 | -1.476 | 0.17189 | 0.323 | -5.51 | -0.0779 | none |
| MAP2K1  | -0.19  | -0.1419 | -1.476 | 0.17191 | 0.323 | -5.51 | 1.28497 | none |
| PIGX    | 0.289  | 0.164   | 1.4756 | 0.17191 | 0.323 | -5.51 | -0.7389 | none |
| WBP4    | -0.224 | -0.1139 | -1.475 | 0.172   | 0.324 | -5.51 | 1.90607 | none |
| GNB1L   | -0.207 | -0.2187 | -1.475 | 0.17218 | 0.324 | -5.51 | 1.33022 | none |
| TMEM126 | -0.25  | -0.3221 | -1.475 | 0.17218 | 0.324 | -5.51 | 0.66063 | none |
| GPATCH4 | 0.409  | 0.5637  | 1.4744 | 0.17221 | 0.324 | -5.51 | -0.6047 | none |
| GADD45G | -0.183 | -0.1683 | -1.474 | 0.17224 | 0.324 | -5.51 | 0.93179 | none |
| PGM2    | -0.14  | -0.1053 | -1.473 | 0.17259 | 0.325 | -5.52 | 1.91224 | none |
| POM121  | 0.328  | 0.4009  | 1.4729 | 0.17262 | 0.325 | -5.52 | -0.5199 | none |
| FAM131B | -0.134 | -0.1145 | -1.473 | 0.17263 | 0.325 | -5.52 | 0.24012 | none |
| KCNK7   | 0.22   | 0.2378  | 1.4724 | 0.17274 | 0.325 | -5.52 | 0.94567 | none |
| ZNF30   | 0.264  | 0.2533  | 1.472  | 0.17284 | 0.325 | -5.52 | 0.89373 | none |
| NSF     | 0.148  | 0.1405  | 1.4719 | 0.17289 | 0.325 | -5.52 | -0.5803 | none |
| SLC18B1 | 0.262  | 0.1476  | 1.4718 | 0.1729  | 0.325 | -5.52 | 0.81543 | none |
| CHAC2   | -0.367 | -0.3465 | -1.472 | 0.1729  | 0.325 | -5.52 | 0.98174 | none |
| YTHDF2  | 0.177  | 0.1859  | 1.4716 | 0.17295 | 0.325 | -5.52 | 0.74591 | none |
| ZFP1    | 0.132  | 0.1682  | 1.4716 | 0.17295 | 0.325 | -5.52 | 1.4641  | none |
| VPS37C  | -0.249 | -0.1434 | -1.471 | 0.17316 | 0.325 | -5.52 | 1.53036 | none |
| PITPNB  | 0.2    | 0.1663  | 1.4708 | 0.17317 | 0.325 | -5.52 | 0.33325 | none |
| SKAP1   | -0.124 | -0.1021 | -1.471 | 0.17317 | 0.325 | -5.52 | 1.01384 | none |

|          |        |         |        |         |       |       |         |            |
|----------|--------|---------|--------|---------|-------|-------|---------|------------|
| EIF1AY   | 0.241  | 0.1385  | 1.4702 | 0.17333 | 0.325 | -5.52 | -0.2173 | none       |
| KARS     | -0.125 | -0.1054 | -1.47  | 0.17334 | 0.325 | -5.52 | 1.17782 | none       |
| SNX7     | 0.358  | 0.2166  | 1.47   | 0.17338 | 0.326 | -5.52 | -0.8132 | none       |
| EXOC6B   | 0.349  | 0.3191  | 1.4699 | 0.17341 | 0.326 | -5.52 | -0.9402 | none       |
| HLA-A    | 0.138  | 0.0159  | 1.4698 | 0.17343 | 0.326 | -5.52 | 0.06733 | none       |
| EAF1     | 0.156  | 0.0949  | 1.4696 | 0.17349 | 0.326 | -5.52 | -1.0284 | none       |
| WDR11    | 0.234  | 0.1963  | 1.4696 | 0.17349 | 0.326 | -5.52 | -0.8047 | none       |
| NKAIN1   | -0.246 | -0.2187 | -1.469 | 0.17356 | 0.326 | -5.52 | 2.00384 | none       |
| IL1RL1   | -0.26  | -0.1774 | -1.469 | 0.17358 | 0.326 | -5.52 | 2.11452 | AA-related |
| CD164    | -0.168 | -0.1574 | -1.469 | 0.17363 | 0.326 | -5.52 | 1.34529 | none       |
| PNISR    | 0.297  | 0.3037  | 1.4689 | 0.17367 | 0.326 | -5.52 | 0.57652 | none       |
| NXPH1    | -0.134 | -0.1345 | -1.469 | 0.1737  | 0.326 | -5.52 | 1.93047 | none       |
| LCN8     | 0.177  | 0.1392  | 1.4688 | 0.17371 | 0.326 | -5.52 | 0.25834 | none       |
| CHPF     | 0.125  | 0.117   | 1.4683 | 0.17383 | 0.326 | -5.52 | 0.63789 | none       |
| GET4     | -0.154 | -0.1006 | -1.468 | 0.17384 | 0.326 | -5.52 | 1.44592 | none       |
| EPRS     | 0.513  | 0.5787  | 1.4681 | 0.17388 | 0.326 | -5.52 | -0.1688 | none       |
| TIMP2    | 0.214  | 0.1935  | 1.4678 | 0.17398 | 0.326 | -5.52 | -0.5035 | none       |
| RABGGTA  | -0.173 | -0.1199 | -1.468 | 0.17399 | 0.326 | -5.52 | 0.9111  | none       |
| FSTL4    | 0.358  | 0.2687  | 1.4672 | 0.17412 | 0.326 | -5.52 | 0.00207 | none       |
| ALS2     | 0.228  | 0.2068  | 1.4669 | 0.1742  | 0.326 | -5.52 | 0.45775 | none       |
| RNF8     | 0.247  | 0.263   | 1.4669 | 0.17422 | 0.326 | -5.52 | 0.10744 | none       |
| PHC2     | -0.292 | -0.2276 | -1.467 | 0.17428 | 0.326 | -5.52 | 0.39158 | none       |
| ANKS1A   | 0.203  | 0.2796  | 1.4666 | 0.17429 | 0.326 | -5.52 | -0.2085 | none       |
| MPZL1    | 0.148  | 0.0853  | 1.4665 | 0.17432 | 0.326 | -5.52 | 0.33272 | none       |
| NTF3     | -0.131 | -0.1313 | -1.466 | 0.17436 | 0.327 | -5.52 | 1.92427 | none       |
| INA      | 0.141  | 0.1434  | 1.466  | 0.17444 | 0.327 | -5.53 | 0.33708 | none       |
| FDXR     | 0.221  | 0.1807  | 1.4659 | 0.17446 | 0.327 | -5.53 | -0.9591 | none       |
| IPO4     | 0.191  | 0.1866  | 1.4653 | 0.17464 | 0.327 | -5.53 | -0.5916 | none       |
| CAPN1    | 0.168  | 0.118   | 1.4652 | 0.17464 | 0.327 | -5.53 | 0.00281 | none       |
| SLC17A3  | -0.153 | -0.0972 | -1.465 | 0.17465 | 0.327 | -5.53 | 0.04485 | none       |
| RNF180   | 0.231  | 0.2028  | 1.4652 | 0.17467 | 0.327 | -5.53 | -0.1493 | none       |
| PSG11    | 0.224  | 0.1961  | 1.4651 | 0.17469 | 0.327 | -5.53 | -0.6603 | none       |
| NECTIN4  | 0.123  | 0.0883  | 1.4649 | 0.17473 | 0.327 | -5.53 | -1.0449 | none       |
| MUC2     | -0.159 | -0.1058 | -1.464 | 0.17485 | 0.327 | -5.53 | 0.96489 | none       |
| SLC4A9   | 0.13   | 0.1269  | 1.4643 | 0.17489 | 0.327 | -5.53 | -0.3392 | none       |
| GAPT     | 0.19   | 0.1704  | 1.464  | 0.17498 | 0.327 | -5.53 | -0.2087 | none       |
| VSTM1    | -0.128 | -0.0853 | -1.464 | 0.175   | 0.327 | -5.53 | 0.35444 | none       |
| ZDHHC11E | -0.2   | -0.225  | -1.464 | 0.17504 | 0.327 | -5.53 | 1.36071 | none       |
| AC007325 | -0.23  | -0.2    | -1.463 | 0.17521 | 0.328 | -5.53 | 0.65628 | none       |
| IL1R2    | -0.163 | -0.1431 | -1.463 | 0.17526 | 0.328 | -5.53 | 2.00444 | none       |

|           |        |         |        |         |       |       |         |      |
|-----------|--------|---------|--------|---------|-------|-------|---------|------|
| LMBRD2    | -0.213 | -0.2073 | -1.463 | 0.17533 | 0.328 | -5.53 | 0.00281 | none |
| OR7G1     | -0.114 | -0.0646 | -1.462 | 0.17549 | 0.328 | -5.53 | 1.0039  | none |
| UBE3D     | 0.259  | 0.1042  | 1.4621 | 0.1755  | 0.328 | -5.53 | -0.7217 | none |
| ELF1      | 0.171  | 0.1563  | 1.4618 | 0.17555 | 0.328 | -5.53 | -0.2233 | none |
| ZMYND8    | 0.397  | 0.4418  | 1.4612 | 0.17572 | 0.328 | -5.53 | -0.8633 | none |
| RAB11FIP4 | 0.432  | 0.3359  | 1.4609 | 0.1758  | 0.328 | -5.53 | -0.5212 | none |
| HIST1H4F  | 0.546  | 0.552   | 1.4607 | 0.17587 | 0.329 | -5.53 | -0.3194 | none |
| OR2A1     | 0.117  | 0.0873  | 1.4605 | 0.17592 | 0.329 | -5.53 | -0.0287 | none |
| BIN2      | 0.45   | 0.4726  | 1.4605 | 0.17593 | 0.329 | -5.53 | -0.3343 | none |
| TRAFD1    | 0.195  | 0.0963  | 1.4601 | 0.17603 | 0.329 | -5.53 | -0.8077 | none |
| LDOC1     | -0.313 | -0.2411 | -1.46  | 0.17615 | 0.329 | -5.53 | 1.84563 | none |
| RBM34     | 0.292  | 0.305   | 1.4593 | 0.17623 | 0.329 | -5.53 | -0.2823 | none |
| LRRC14    | 0.242  | 0.1837  | 1.4593 | 0.17624 | 0.329 | -5.53 | -0.2672 | none |
| PPFIBP1   | 0.349  | 0.3298  | 1.4592 | 0.17627 | 0.329 | -5.53 | -0.0747 | none |
| ZBED3     | 0.121  | 0.1123  | 1.459  | 0.17632 | 0.329 | -5.53 | -0.3827 | none |
| PAOX      | -0.285 | -0.2139 | -1.459 | 0.17639 | 0.329 | -5.53 | 1.04402 | none |
| NIPBL     | 0.386  | 0.52    | 1.4586 | 0.17643 | 0.329 | -5.53 | -0.1671 | none |
| CDK2AP1   | 0.193  | 0.113   | 1.4586 | 0.17643 | 0.329 | -5.53 | -0.1849 | none |
| PRPF6     | 0.367  | 0.445   | 1.4585 | 0.17644 | 0.329 | -5.53 | -0.2306 | none |
| MMP9      | -0.131 | -0.0933 | -1.458 | 0.17646 | 0.329 | -5.53 | 0.38347 | none |
| HPCAL4    | 0.155  | 0.1325  | 1.4571 | 0.17682 | 0.33  | -5.54 | -0.1174 | none |
| AQP7      | 0.558  | 0.4532  | 1.4569 | 0.17689 | 0.33  | -5.54 | -0.8697 | none |
| PARS2     | -0.126 | -0.0567 | -1.457 | 0.17694 | 0.33  | -5.54 | 1.54435 | none |
| DTNB      | -0.18  | -0.0429 | -1.457 | 0.17697 | 0.33  | -5.54 | 1.40236 | none |
| RLN3      | -0.121 | -0.0866 | -1.457 | 0.17697 | 0.33  | -5.54 | 1.41439 | none |
| SLC6A8    | 0.486  | 0.2867  | 1.4562 | 0.17707 | 0.33  | -5.54 | -0.4919 | none |
| CDK11B    | 0.386  | 0.4611  | 1.4559 | 0.17716 | 0.33  | -5.54 | -0.465  | none |
| ETHE1     | -0.239 | -0.2657 | -1.456 | 0.17718 | 0.33  | -5.54 | 1.32708 | none |
| ZNF705B   | 0.121  | 0.1211  | 1.4557 | 0.17721 | 0.33  | -5.54 | 1.0648  | none |
| FAM217B   | 0.144  | 0.1352  | 1.4548 | 0.17746 | 0.331 | -5.54 | 0.52224 | none |
| EXT1      | 0.236  | 0.2189  | 1.4546 | 0.1775  | 0.331 | -5.54 | -0.1226 | none |
| EMC6      | -0.239 | -0.2237 | -1.455 | 0.17751 | 0.331 | -5.54 | 2.00071 | none |
| RNASET2   | 0.16   | 0.0623  | 1.4536 | 0.17779 | 0.331 | -5.54 | 0.35075 | none |
| TRMT11    | -0.154 | -0.1473 | -1.454 | 0.17779 | 0.331 | -5.54 | 1.43823 | none |
| ETV3      | 0.148  | 0.1376  | 1.4534 | 0.17783 | 0.331 | -5.54 | -0.7862 | none |
| ADAM28    | 0.119  | 0.115   | 1.4529 | 0.17795 | 0.331 | -5.54 | 1.4224  | none |
| GPRIN1    | 0.211  | 0.2628  | 1.4526 | 0.17805 | 0.332 | -5.54 | 0.13615 | none |
| DAAM1     | 0.359  | 0.3285  | 1.4521 | 0.17817 | 0.332 | -5.54 | -0.5498 | none |
| MRPL14    | -0.241 | -0.2507 | -1.452 | 0.1783  | 0.332 | -5.54 | 0.80972 | none |
| IMMT      | 0.403  | 0.4459  | 1.4511 | 0.17845 | 0.332 | -5.54 | 0.2414  | none |

|          |        |         |        |         |       |       |         |            |
|----------|--------|---------|--------|---------|-------|-------|---------|------------|
| EIF4G1   | 0.476  | 0.6511  | 1.4511 | 0.17846 | 0.332 | -5.54 | -0.3864 | none       |
| RAB28    | -0.135 | -0.187  | -1.451 | 0.17853 | 0.332 | -5.54 | -0.1388 | none       |
| CRAMP1   | 0.301  | 0.3396  | 1.4506 | 0.17859 | 0.332 | -5.55 | -0.2439 | none       |
| UROS     | 0.197  | 0.1347  | 1.4502 | 0.1787  | 0.332 | -5.55 | -0.0946 | none       |
| ZFPL1    | -0.299 | -0.1652 | -1.449 | 0.1789  | 0.333 | -5.55 | 1.56761 | none       |
| PRR7     | -0.158 | -0.1413 | -1.449 | 0.17891 | 0.333 | -5.55 | 1.7178  | none       |
| TAP2     | 0.346  | 0.3096  | 1.4494 | 0.17891 | 0.333 | -5.55 | 0.31043 | none       |
| KATNA1   | -0.177 | -0.1419 | -1.449 | 0.17904 | 0.333 | -5.55 | 1.36189 | none       |
| ARL14EP  | -0.191 | -0.1552 | -1.449 | 0.17904 | 0.333 | -5.55 | 2.18701 | AA-related |
| TRAPPC2B | 0.215  | 0.0327  | 1.4487 | 0.1791  | 0.333 | -5.55 | -0.8145 | none       |
| SH3BP5L  | -0.239 | -0.0705 | -1.449 | 0.1791  | 0.333 | -5.55 | 1.81721 | none       |
| FAM207A  | 0.139  | 0.1546  | 1.4483 | 0.1792  | 0.333 | -5.55 | 0.6316  | none       |
| CNBD2    | 0.312  | 0.1442  | 1.4483 | 0.17923 | 0.333 | -5.55 | -0.813  | none       |
| C9ORF40  | -0.274 | -0.2082 | -1.448 | 0.17925 | 0.333 | -5.55 | 2.02704 | none       |
| EPN1     | 0.191  | 0.1761  | 1.4482 | 0.17926 | 0.333 | -5.55 | 0.26159 | none       |
| GRB14    | -0.12  | -0.1204 | -1.447 | 0.17955 | 0.334 | -5.55 | 1.36588 | none       |
| CABP2    | -0.114 | -0.0886 | -1.447 | 0.1796  | 0.334 | -5.55 | 0.83869 | none       |
| NRCAM    | 0.183  | 0.2165  | 1.4468 | 0.17964 | 0.334 | -5.55 | 0.01377 | none       |
| RCAN3    | 0.177  | 0.084   | 1.4465 | 0.1797  | 0.334 | -5.55 | -0.3316 | none       |
| TFB1M    | 0.162  | 0.0662  | 1.446  | 0.17983 | 0.334 | -5.55 | -0.5295 | none       |
| DDX54    | 0.386  | 0.4544  | 1.446  | 0.17984 | 0.334 | -5.55 | -0.5504 | none       |
| SAMD13   | -0.141 | -0.1036 | -1.446 | 0.17984 | 0.334 | -5.55 | -0.3773 | none       |
| NPR1     | 0.123  | 0.1281  | 1.446  | 0.17985 | 0.334 | -5.55 | -0.7533 | none       |
| ZSWIM6   | 0.219  | 0.2482  | 1.4459 | 0.17988 | 0.334 | -5.55 | 0.12849 | none       |
| FOXD4    | 0.13   | 0.0969  | 1.4458 | 0.17989 | 0.334 | -5.55 | -1.1597 | none       |
| RERE     | 0.502  | 0.5715  | 1.4458 | 0.17991 | 0.334 | -5.55 | -0.612  | none       |
| ARMCX3   | 0.141  | 0.0757  | 1.4457 | 0.17993 | 0.334 | -5.55 | 0.72218 | none       |
| OR8G1    | 0.122  | 0.093   | 1.4456 | 0.17995 | 0.334 | -5.55 | -1.259  | none       |
| AGAP2    | 0.424  | 0.5133  | 1.4449 | 0.18014 | 0.334 | -5.55 | 0.02899 | none       |
| AHRR     | 0.309  | 0.2556  | 1.4448 | 0.18018 | 0.334 | -5.55 | -0.5327 | none       |
| TSHZ1    | 0.277  | 0.306   | 1.4448 | 0.18018 | 0.334 | -5.55 | -0.3271 | none       |
| SCNN1D   | -0.153 | -0.1493 | -1.445 | 0.18025 | 0.334 | -5.55 | 0.28512 | none       |
| HK1      | 0.232  | 0.2792  | 1.4443 | 0.18032 | 0.334 | -5.55 | 0.54166 | none       |
| SAYSD1   | 0.171  | 0.066   | 1.4436 | 0.18051 | 0.335 | -5.55 | 0.05822 | none       |
| NEURL4   | 0.345  | 0.3963  | 1.4435 | 0.18052 | 0.335 | -5.55 | -0.5803 | none       |
| CLPSL1   | -0.132 | -0.1119 | -1.444 | 0.18052 | 0.335 | -5.55 | -0.5689 | none       |
| TP53TG3D | 0.162  | 0.1064  | 1.4434 | 0.18056 | 0.335 | -5.55 | 0.34025 | none       |
| TMX2-CTN | -0.104 | -0.1385 | -1.443 | 0.18058 | 0.335 | -5.55 | 0.57316 | none       |
| ZFHX2    | 0.272  | 0.2754  | 1.4433 | 0.18059 | 0.335 | -5.55 | -0.4398 | none       |
| UMODL1   | -0.128 | -0.1231 | -1.443 | 0.18067 | 0.335 | -5.55 | 0.13477 | none       |

|          |        |         |        |         |       |       |         |      |
|----------|--------|---------|--------|---------|-------|-------|---------|------|
| KLF12    | 0.244  | 0.295   | 1.4429 | 0.18068 | 0.335 | -5.55 | 0.41099 | none |
| SAMM50   | -0.157 | -0.1944 | -1.443 | 0.18073 | 0.335 | -5.56 | 0.6537  | none |
| PPP2CA   | -0.176 | -0.1371 | -1.443 | 0.18079 | 0.335 | -5.56 | 1.90332 | none |
| ESRRB    | 0.169  | 0.1288  | 1.4425 | 0.1808  | 0.335 | -5.56 | -1.0807 | none |
| NEO1     | 0.688  | 0.4944  | 1.4423 | 0.18085 | 0.335 | -5.56 | 0.16371 | none |
| NDUFB1   | -0.261 | -0.3203 | -1.442 | 0.18092 | 0.335 | -5.56 | 0.78451 | none |
| LCN6     | -0.124 | -0.0827 | -1.441 | 0.18112 | 0.335 | -5.56 | 0.86893 | none |
| SLC36A1  | 0.294  | 0.3491  | 1.4412 | 0.18115 | 0.335 | -5.56 | 1.07086 | none |
| GAS2L1   | 0.134  | 0.1434  | 1.4409 | 0.18125 | 0.336 | -5.56 | 0.34856 | none |
| GEMIN6   | 0.235  | 0.0634  | 1.4405 | 0.18135 | 0.336 | -5.56 | -0.7592 | none |
| ANKHD1-E | 0.382  | 0.3981  | 1.4404 | 0.18138 | 0.336 | -5.56 | -0.4426 | none |
| ADAMTS1  | 0.202  | 0.1396  | 1.4404 | 0.18139 | 0.336 | -5.56 | -0.6428 | none |
| SMG5     | 0.293  | 0.4144  | 1.4403 | 0.18142 | 0.336 | -5.56 | 0.86172 | none |
| TMEM235  | 0.159  | 0.1561  | 1.44   | 0.1815  | 0.336 | -5.56 | 0.5237  | none |
| LUZP2    | 0.123  | 0.0707  | 1.4398 | 0.18156 | 0.336 | -5.56 | -0.5713 | none |
| KIF9     | 0.315  | 0.1985  | 1.4392 | 0.18172 | 0.336 | -5.56 | 0.88866 | none |
| SERPINI1 | 0.376  | 0.2315  | 1.4388 | 0.18184 | 0.336 | -5.56 | -0.6614 | none |
| 3-Sep    | -0.138 | -0.0764 | -1.439 | 0.18186 | 0.336 | -5.56 | 0.93965 | none |
| ITGB3    | 0.141  | 0.0992  | 1.4383 | 0.18197 | 0.337 | -5.56 | -1.2899 | none |
| LCN9     | 0.137  | 0.1374  | 1.4382 | 0.18198 | 0.337 | -5.56 | 0.7069  | none |
| HHIPL1   | 0.141  | 0.1222  | 1.4382 | 0.18199 | 0.337 | -5.56 | -0.6795 | none |
| GJB7     | 0.321  | 0.2714  | 1.438  | 0.18205 | 0.337 | -5.56 | -0.0951 | none |
| KAT2A    | 0.265  | 0.2815  | 1.4377 | 0.18213 | 0.337 | -5.56 | -0.3437 | none |
| BUB1     | 0.285  | 0.3198  | 1.4375 | 0.18217 | 0.337 | -5.56 | 0.54107 | none |
| ICAM3    | -0.167 | -0.1918 | -1.437 | 0.18245 | 0.337 | -5.56 | 1.99788 | none |
| YTHDC1   | 0.38   | 0.4903  | 1.4365 | 0.18245 | 0.337 | -5.56 | 0.59176 | none |
| SNRPD3   | -0.167 | -0.1501 | -1.436 | 0.18257 | 0.337 | -5.56 | 0.17173 | none |
| ENPP6    | 0.134  | 0.092   | 1.4355 | 0.18273 | 0.338 | -5.56 | -0.7377 | none |
| MYH9     | 0.493  | 0.6438  | 1.4354 | 0.18276 | 0.338 | -5.56 | -0.2555 | none |
| NET1     | 0.164  | 0.1638  | 1.4351 | 0.18284 | 0.338 | -5.56 | -0.3626 | none |
| SNTB1    | 0.231  | 0.2634  | 1.4351 | 0.18284 | 0.338 | -5.56 | -0.0668 | none |
| ZNF565   | 0.124  | 0.1192  | 1.4342 | 0.1831  | 0.338 | -5.57 | -0.123  | none |
| ZNF14    | 0.228  | 0.2403  | 1.4342 | 0.18311 | 0.338 | -5.57 | -0.2351 | none |
| SPTLC2   | 0.203  | 0.151   | 1.4337 | 0.18323 | 0.338 | -5.57 | 0.98819 | none |
| KIF13B   | 0.402  | 0.4249  | 1.4335 | 0.1833  | 0.338 | -5.57 | 0.46236 | none |
| C4ORF45  | 0.154  | 0.1346  | 1.4332 | 0.18339 | 0.339 | -5.57 | 0.67903 | none |
| SAMD10   | 0.207  | 0.1432  | 1.4329 | 0.18345 | 0.339 | -5.57 | 0.38319 | none |
| DALRD3   | 0.206  | 0.1031  | 1.4329 | 0.18347 | 0.339 | -5.57 | 0.87298 | none |
| BRSK2    | 0.273  | 0.2299  | 1.4321 | 0.18368 | 0.339 | -5.57 | -0.5711 | none |
| UBE4A    | 0.231  | 0.2407  | 1.4316 | 0.18382 | 0.339 | -5.57 | -0.0425 | none |



|          |        |         |        |         |       |       |         |      |
|----------|--------|---------|--------|---------|-------|-------|---------|------|
| SUV39H2  | 0.223  | 0.0931  | 1.4306 | 0.18409 | 0.34  | -5.57 | -0.2291 | none |
| NDFIP1   | -0.193 | -0.2401 | -1.43  | 0.18426 | 0.34  | -5.57 | 0.81322 | none |
| DSC1     | 0.104  | 0.0832  | 1.4298 | 0.18432 | 0.34  | -5.57 | -0.3511 | none |
| EIF2AK3  | 0.212  | 0.2287  | 1.4298 | 0.18433 | 0.34  | -5.57 | -0.5566 | none |
| KRT6A    | -0.244 | -0.2245 | -1.43  | 0.18438 | 0.34  | -5.57 | 0.22449 | none |
| NDUFA9   | -0.219 | -0.235  | -1.429 | 0.18446 | 0.34  | -5.57 | 0.04156 | none |
| CTNNA2   | 0.153  | 0.1537  | 1.429  | 0.18456 | 0.34  | -5.57 | -0.5508 | none |
| TMEM221  | 0.303  | 0.2444  | 1.429  | 0.18456 | 0.34  | -5.57 | -0.8086 | none |
| ASPM     | 0.394  | 0.4959  | 1.4289 | 0.18459 | 0.34  | -5.57 | 0.23943 | none |
| TEX38    | -0.138 | -0.0912 | -1.428 | 0.18471 | 0.34  | -5.57 | 0.31088 | none |
| PTP4A2   | 0.119  | 0.0176  | 1.4283 | 0.18473 | 0.34  | -5.57 | 0.6178  | none |
| STK35    | 0.184  | 0.237   | 1.4283 | 0.18474 | 0.34  | -5.57 | -0.0082 | none |
| CACNG5   | 0.13   | 0.1297  | 1.4282 | 0.18478 | 0.34  | -5.57 | 1.17005 | none |
| FBXO34   | 0.309  | 0.3165  | 1.4277 | 0.1849  | 0.341 | -5.57 | -0.1991 | none |
| FCHSD2   | 0.283  | 0.2948  | 1.4274 | 0.185   | 0.341 | -5.57 | 0.96267 | none |
| NNMT     | -0.129 | -0.0996 | -1.427 | 0.18513 | 0.341 | -5.58 | 0.27456 | none |
| PIP4K2A  | 0.275  | 0.3007  | 1.4269 | 0.18513 | 0.341 | -5.58 | -0.9943 | none |
| HSD17B14 | 0.262  | 0.2055  | 1.4266 | 0.18521 | 0.341 | -5.58 | -0.3507 | none |
| NHS      | 0.276  | 0.3633  | 1.4264 | 0.18529 | 0.341 | -5.58 | 0.99864 | none |
| DET1     | 0.256  | 0.1514  | 1.425  | 0.18568 | 0.342 | -5.58 | -0.2971 | none |
| TRMT1    | 0.123  | 0.1491  | 1.4248 | 0.18572 | 0.342 | -5.58 | 0.49513 | none |
| PCP4     | -0.125 | -0.1247 | -1.425 | 0.1858  | 0.342 | -5.58 | 1.04028 | none |
| SLC9A8   | 0.185  | 0.1988  | 1.4242 | 0.1859  | 0.342 | -5.58 | -0.9473 | none |
| TPO      | 0.1    | 0.0763  | 1.4239 | 0.18597 | 0.342 | -5.58 | -0.4985 | none |
| ACAN     | 0.122  | 0.0965  | 1.4239 | 0.18599 | 0.342 | -5.58 | -0.0843 | none |
| RGS19    | -0.169 | -0.1971 | -1.424 | 0.18603 | 0.342 | -5.58 | 1.06986 | none |
| MT-ND6   | 0.452  | 0.4907  | 1.4237 | 0.18603 | 0.342 | -5.58 | -0.2514 | none |
| NMU      | 0.35   | 0.1898  | 1.4236 | 0.18607 | 0.342 | -5.58 | 0.4515  | none |
| HSF5     | -0.155 | -0.1539 | -1.423 | 0.18609 | 0.342 | -5.58 | 1.19339 | none |
| ASCL3    | 0.125  | 0.0831  | 1.4235 | 0.18611 | 0.342 | -5.58 | 1.11751 | none |
| WNT5A    | 0.276  | 0.2761  | 1.4234 | 0.18611 | 0.342 | -5.58 | 1.11927 | none |
| CEBPB    | -0.115 | -0.0688 | -1.423 | 0.18611 | 0.342 | -5.58 | 0.75461 | none |
| VDR      | 0.33   | 0.4479  | 1.4234 | 0.18612 | 0.342 | -5.58 | 0.38143 | none |
| ATP23    | 0.233  | 0.1794  | 1.4231 | 0.18619 | 0.342 | -5.58 | -0.0703 | none |
| CTNNAL1  | 0.162  | 0.1574  | 1.423  | 0.18623 | 0.342 | -5.58 | 0.99033 | none |
| PGAP1    | 0.166  | 0.1058  | 1.4228 | 0.18629 | 0.342 | -5.58 | -0.1929 | none |
| CPSF1    | 0.246  | 0.3142  | 1.4227 | 0.18631 | 0.342 | -5.58 | 0.15665 | none |
| PREP     | 0.174  | 0.1718  | 1.4227 | 0.18631 | 0.342 | -5.58 | 0.75697 | none |
| PARVG    | -0.127 | -0.0584 | -1.423 | 0.18631 | 0.342 | -5.58 | 1.56015 | none |
| KCNA5    | 0.135  | 0.0867  | 1.4226 | 0.18634 | 0.342 | -5.58 | -1.0658 | none |

|          |        |         |        |         |       |       |         |            |
|----------|--------|---------|--------|---------|-------|-------|---------|------------|
| RGS22    | 0.166  | 0.1166  | 1.4225 | 0.18636 | 0.342 | -5.58 | 0.43535 | none       |
| TFEC     | -0.168 | -0.0904 | -1.423 | 0.18636 | 0.342 | -5.58 | 0.87259 | none       |
| ARHGAP35 | 0.37   | 0.519   | 1.4225 | 0.18637 | 0.342 | -5.58 | -0.1056 | none       |
| PTPN7    | 0.214  | 0.2818  | 1.4225 | 0.18639 | 0.342 | -5.58 | -0.0287 | none       |
| ANKRD12  | 0.201  | 0.2274  | 1.4224 | 0.1864  | 0.342 | -5.58 | -0.0836 | none       |
| RANBP6   | 0.211  | 0.1597  | 1.4223 | 0.18644 | 0.342 | -5.58 | 0.32611 | none       |
| IMPAD1   | 0.305  | 0.1823  | 1.4222 | 0.18646 | 0.342 | -5.58 | -0.7993 | none       |
| CCNE1    | 0.214  | 0.1913  | 1.4221 | 0.18649 | 0.342 | -5.58 | 0.07754 | none       |
| KIAA1586 | 0.327  | 0.2741  | 1.422  | 0.18652 | 0.342 | -5.58 | -0.1325 | none       |
| F12      | 0.407  | 0.3098  | 1.4216 | 0.18662 | 0.342 | -5.58 | -0.0543 | none       |
| SH3KBP1  | 0.42   | 0.5022  | 1.421  | 0.1868  | 0.343 | -5.58 | 0.57178 | none       |
| NME7     | 0.213  | 0.0552  | 1.421  | 0.18681 | 0.343 | -5.58 | -0.432  | none       |
| NDUFA10  | -0.103 | -0.0537 | -1.421 | 0.18687 | 0.343 | -5.58 | 1.68996 | none       |
| AREL1    | 0.208  | 0.1611  | 1.4206 | 0.1869  | 0.343 | -5.58 | -1.2668 | none       |
| BAHD1    | 0.311  | 0.341   | 1.4206 | 0.18691 | 0.343 | -5.58 | 0.42194 | none       |
| MT-ATP8  | 0.382  | 0.3601  | 1.4205 | 0.18693 | 0.343 | -5.58 | 0.35852 | none       |
| AARS     | 0.25   | 0.2927  | 1.4204 | 0.18697 | 0.343 | -5.58 | 0.3369  | none       |
| NAGPA    | 0.153  | 0.1155  | 1.4202 | 0.18702 | 0.343 | -5.58 | -0.0766 | none       |
| ZNF781   | 0.504  | 0.5076  | 1.4202 | 0.18702 | 0.343 | -5.58 | -0.4497 | none       |
| DCAF12   | 0.147  | 0.0593  | 1.4202 | 0.18703 | 0.343 | -5.58 | 1.02301 | none       |
| SOGA3    | 0.158  | 0.1932  | 1.4201 | 0.18704 | 0.343 | -5.58 | -0.3399 | none       |
| SMCO4    | -0.243 | -0.2006 | -1.42  | 0.18707 | 0.343 | -5.58 | 1.67563 | none       |
| TRIM49D2 | -0.126 | -0.1347 | -1.42  | 0.18718 | 0.343 | -5.58 | 0.81413 | none       |
| RPL39L   | -0.238 | -0.2992 | -1.42  | 0.1872  | 0.343 | -5.58 | 1.48546 | none       |
| ZNF626   | 0.205  | 0.0791  | 1.4195 | 0.18722 | 0.343 | -5.58 | 0.19679 | none       |
| TRA2B    | -0.157 | -0.1808 | -1.419 | 0.18731 | 0.343 | -5.59 | 2.11396 | AA-related |
| IGFL1    | -0.113 | -0.113  | -1.419 | 0.18732 | 0.343 | -5.59 | -0.2788 | none       |
| LUZP1    | 0.416  | 0.4876  | 1.4191 | 0.18735 | 0.343 | -5.59 | -0.2283 | none       |
| SLC25A27 | 0.334  | 0.2569  | 1.4191 | 0.18735 | 0.343 | -5.59 | -0.4242 | none       |
| MYL6B    | 0.174  | 0.1064  | 1.419  | 0.18737 | 0.343 | -5.59 | 0.44476 | none       |
| CEMP1    | 0.397  | 0.2825  | 1.4186 | 0.18747 | 0.343 | -5.59 | 0.2999  | none       |
| GOT1L1   | 0.16   | 0.1746  | 1.4186 | 0.18748 | 0.343 | -5.59 | -0.0275 | none       |
| ERRFI1   | -0.157 | -0.1447 | -1.419 | 0.18749 | 0.343 | -5.59 | 1.4724  | none       |
| BRIX1    | 0.174  | 0.1698  | 1.4183 | 0.18757 | 0.343 | -5.59 | -0.7288 | none       |
| IL5RA    | 0.152  | 0.1368  | 1.4182 | 0.18759 | 0.343 | -5.59 | -1.1164 | none       |
| TREH     | 0.231  | 0.2308  | 1.4182 | 0.1876  | 0.343 | -5.59 | 0.43847 | none       |
| VRK1     | -0.146 | -0.1268 | -1.418 | 0.18761 | 0.343 | -5.59 | 1.40319 | none       |
| HDX      | -0.221 | -0.1821 | -1.418 | 0.18761 | 0.343 | -5.59 | 1.32715 | none       |
| EVA1A    | 0.143  | 0.1514  | 1.4178 | 0.18769 | 0.343 | -5.59 | 0.5925  | none       |
| ZNF792   | 0.125  | 0.1449  | 1.4175 | 0.18779 | 0.343 | -5.59 | 1.47722 | none       |

|           |        |         |        |         |       |       |         |            |
|-----------|--------|---------|--------|---------|-------|-------|---------|------------|
| CDKN1C    | -0.153 | -0.1802 | -1.418 | 0.18779 | 0.343 | -5.59 | 1.44231 | none       |
| HDAC2     | -0.182 | -0.0991 | -1.417 | 0.1879  | 0.344 | -5.59 | 2.00813 | none       |
| KIF24     | 0.246  | 0.2706  | 1.4171 | 0.18791 | 0.344 | -5.59 | -0.4051 | none       |
| EEF2KMT   | 0.25   | 0.2102  | 1.4171 | 0.18792 | 0.344 | -5.59 | 0.16104 | none       |
| ZBTB41    | 0.217  | 0.2227  | 1.417  | 0.18792 | 0.344 | -5.59 | 0.55922 | none       |
| ATP1B3    | -0.127 | -0.1372 | -1.416 | 0.18814 | 0.344 | -5.59 | 1.05854 | none       |
| BEST4     | 0.148  | 0.1248  | 1.4161 | 0.18818 | 0.344 | -5.59 | 0.72592 | none       |
| COL6A2    | 0.42   | 0.3584  | 1.416  | 0.1882  | 0.344 | -5.59 | -0.6089 | none       |
| PCED1B    | 0.213  | 0.1731  | 1.4158 | 0.18828 | 0.344 | -5.59 | -0.458  | none       |
| OR5H14    | 0.105  | 0.0782  | 1.4157 | 0.18831 | 0.344 | -5.59 | -0.4496 | none       |
| BICD2     | 0.354  | 0.4706  | 1.4156 | 0.18834 | 0.344 | -5.59 | 0.07054 | none       |
| MYOF      | 0.435  | 0.5631  | 1.4154 | 0.18838 | 0.344 | -5.59 | 0.07046 | none       |
| PLA2G2A   | -0.179 | -0.12   | -1.415 | 0.18847 | 0.344 | -5.59 | 1.0021  | none       |
| SYCP2L    | -0.288 | -0.2266 | -1.415 | 0.18848 | 0.344 | -5.59 | 1.52929 | none       |
| CEND1     | 0.359  | 0.3908  | 1.415  | 0.1885  | 0.344 | -5.59 | 1.06506 | none       |
| ACAP3     | 0.323  | 0.2907  | 1.4141 | 0.18877 | 0.345 | -5.59 | -0.1777 | none       |
| PGLYRP3   | -0.116 | -0.0829 | -1.414 | 0.18887 | 0.345 | -5.59 | 0.94332 | none       |
| KCNH2     | 0.124  | 0.1063  | 1.4133 | 0.189   | 0.345 | -5.59 | -0.1468 | none       |
| KCNJ2     | -0.099 | -0.0796 | -1.413 | 0.18902 | 0.345 | -5.59 | 2.30605 | AA-related |
| REG1B     | 0.169  | 0.1691  | 1.4131 | 0.18904 | 0.345 | -5.59 | -0.5233 | none       |
| TIGIT     | -0.175 | -0.238  | -1.413 | 0.18908 | 0.345 | -5.59 | 1.49783 | none       |
| STK32A    | 0.116  | 0.0976  | 1.413  | 0.18908 | 0.345 | -5.59 | -0.9077 | none       |
| AFF2      | 0.144  | 0.1138  | 1.4127 | 0.18914 | 0.345 | -5.59 | -1.1666 | none       |
| RNF170    | 0.221  | 0.0701  | 1.4125 | 0.18923 | 0.345 | -5.59 | 0.07265 | none       |
| PON1      | 0.29   | 0.1818  | 1.4122 | 0.1893  | 0.345 | -5.59 | -0.6391 | none       |
| KRTAP13-3 | 0.116  | 0.116   | 1.4121 | 0.18933 | 0.345 | -5.59 | 0.86214 | none       |
| FXD4      | -0.125 | -0.0795 | -1.412 | 0.1894  | 0.345 | -5.59 | 1.2992  | none       |
| GPN2      | 0.179  | 0.0935  | 1.4116 | 0.18947 | 0.346 | -5.59 | 0.73087 | none       |
| HLF       | 0.194  | 0.1047  | 1.4111 | 0.18961 | 0.346 | -5.6  | 0.44903 | none       |
| AK8       | -0.364 | -0.328  | -1.411 | 0.18961 | 0.346 | -5.6  | 0.8354  | none       |
| GRK3      | 0.277  | 0.2781  | 1.4111 | 0.18961 | 0.346 | -5.6  | -0.4221 | none       |
| MAPKAPK1  | -0.124 | -0.0171 | -1.411 | 0.18971 | 0.346 | -5.6  | 1.72055 | none       |
| HNRNPU    | 0.496  | 0.6282  | 1.4105 | 0.18978 | 0.346 | -5.6  | -0.1074 | none       |
| C1ORF21   | -0.223 | -0.2203 | -1.41  | 0.18979 | 0.346 | -5.6  | 1.7252  | none       |
| AUH       | 0.109  | 0.1192  | 1.4099 | 0.18996 | 0.346 | -5.6  | 1.7425  | none       |
| OR10V1    | 0.112  | 0.0862  | 1.4098 | 0.19    | 0.346 | -5.6  | 1.2838  | none       |
| CEP104    | 0.389  | 0.3631  | 1.4097 | 0.19002 | 0.346 | -5.6  | -0.6758 | none       |
| LYSMD3    | 0.172  | 0.048   | 1.4094 | 0.1901  | 0.346 | -5.6  | 1.26126 | none       |
| GPRC5C    | -0.174 | -0.119  | -1.409 | 0.19012 | 0.346 | -5.6  | 0.31139 | none       |
| CRISPLD1  | -0.123 | -0.1273 | -1.409 | 0.19013 | 0.346 | -5.6  | 2.06316 | none       |

|           |        |         |        |         |       |       |         |            |
|-----------|--------|---------|--------|---------|-------|-------|---------|------------|
| OC90      | 0.124  | 0.082   | 1.409  | 0.19023 | 0.346 | -5.6  | -0.5465 | none       |
| NEMP2     | 0.15   | 0.0917  | 1.4089 | 0.19024 | 0.346 | -5.6  | 0.68727 | none       |
| HTR3A     | -0.107 | -0.0972 | -1.409 | 0.19033 | 0.346 | -5.6  | 2.13398 | AA-related |
| THUMPD2   | 0.155  | 0.153   | 1.4086 | 0.19033 | 0.346 | -5.6  | 1.00681 | none       |
| MCM7      | -0.119 | -0.0673 | -1.409 | 0.19033 | 0.346 | -5.6  | 1.4246  | none       |
| CDRT15    | 0.343  | 0.3586  | 1.4086 | 0.19034 | 0.346 | -5.6  | -0.6679 | none       |
| ADAM17    | 0.308  | 0.238   | 1.4085 | 0.19035 | 0.346 | -5.6  | -0.4085 | none       |
| PAK2      | 0.156  | 0.1315  | 1.4085 | 0.19036 | 0.346 | -5.6  | -0.2391 | none       |
| TNRC6C    | 0.231  | 0.2244  | 1.4084 | 0.19039 | 0.346 | -5.6  | 0.22388 | none       |
| VPS4A     | 0.187  | 0.2296  | 1.4083 | 0.1904  | 0.346 | -5.6  | 1.40818 | none       |
| SPIDR     | 0.172  | 0.118   | 1.4082 | 0.19045 | 0.346 | -5.6  | -0.4478 | none       |
| KRTAP10-1 | -0.119 | -0.0791 | -1.408 | 0.19054 | 0.347 | -5.6  | 1.67587 | none       |
| EFCAB6    | 0.304  | 0.2373  | 1.4078 | 0.19058 | 0.347 | -5.6  | 0.10699 | none       |
| RAB4B     | 0.185  | 0.0682  | 1.4074 | 0.19068 | 0.347 | -5.6  | -0.4761 | none       |
| CES2      | 0.212  | 0.2863  | 1.4065 | 0.19093 | 0.347 | -5.6  | -0.1496 | none       |
| GP6       | 0.171  | 0.1064  | 1.4065 | 0.19093 | 0.347 | -5.6  | -1.0196 | none       |
| RPS14     | -0.291 | -0.3262 | -1.406 | 0.19108 | 0.347 | -5.6  | 0.86495 | none       |
| RBKS      | -0.256 | -0.2577 | -1.406 | 0.19119 | 0.348 | -5.6  | 1.26617 | none       |
| CSE1L     | 0.136  | 0.1286  | 1.4055 | 0.19122 | 0.348 | -5.6  | 0.47939 | none       |
| S100B     | 0.145  | 0.0692  | 1.4051 | 0.19134 | 0.348 | -5.6  | -0.3195 | none       |
| IL4I1     | -0.196 | -0.0301 | -1.405 | 0.19139 | 0.348 | -5.6  | 1.0505  | none       |
| EEFSEC    | 0.209  | 0.2715  | 1.4049 | 0.19141 | 0.348 | -5.6  | 1.15261 | none       |
| ARHGEF28  | 0.416  | 0.4087  | 1.4045 | 0.19152 | 0.348 | -5.6  | 0.52441 | none       |
| BCL3      | 0.178  | 0.1724  | 1.404  | 0.19166 | 0.348 | -5.6  | -0.3083 | none       |
| ERCC6L2   | 0.386  | 0.4871  | 1.4038 | 0.19173 | 0.348 | -5.6  | 0.0467  | none       |
| CATSPER1  | -0.133 | -0.1035 | -1.404 | 0.19176 | 0.348 | -5.6  | 1.11599 | none       |
| SIRPB1    | -0.201 | -0.1755 | -1.404 | 0.19177 | 0.348 | -5.6  | 0.00469 | none       |
| NTF4      | 0.141  | 0.1413  | 1.4035 | 0.19179 | 0.348 | -5.6  | 0.24563 | none       |
| PLEKHA6   | -0.141 | -0.1389 | -1.403 | 0.19187 | 0.348 | -5.61 | 2.03013 | none       |
| TMEM134   | 0.234  | 0.1436  | 1.4033 | 0.19187 | 0.348 | -5.61 | -0.0538 | none       |
| FFAR3     | -0.095 | -0.0733 | -1.403 | 0.19194 | 0.348 | -5.61 | 0.89399 | none       |
| IER5L     | -0.112 | -0.1084 | -1.403 | 0.19195 | 0.348 | -5.61 | 0.68661 | none       |
| KPNA6     | 0.141  | 0.0982  | 1.403  | 0.19196 | 0.348 | -5.61 | -0.1812 | none       |
| UPK3B     | -0.139 | -0.0836 | -1.403 | 0.19207 | 0.349 | -5.61 | 1.22049 | none       |
| WNT8B     | -0.096 | -0.0735 | -1.402 | 0.19214 | 0.349 | -5.61 | 1.2281  | none       |
| ZBTB44    | 0.185  | 0.1768  | 1.4019 | 0.19226 | 0.349 | -5.61 | -0.5892 | none       |
| SERF1A    | 0.378  | 0.3578  | 1.4014 | 0.19242 | 0.349 | -5.61 | 0.93592 | none       |
| HBG1      | 0.223  | 0.1677  | 1.4011 | 0.19249 | 0.349 | -5.61 | -0.7374 | none       |
| TSSK6     | -0.117 | -0.031  | -1.401 | 0.19255 | 0.349 | -5.61 | 0.40205 | none       |
| CD28      | -0.117 | -0.1151 | -1.401 | 0.19264 | 0.349 | -5.61 | 1.20557 | none       |

|          |        |         |        |         |       |       |         |            |
|----------|--------|---------|--------|---------|-------|-------|---------|------------|
| ZBTB6    | -0.123 | -0.1366 | -1.4   | 0.19273 | 0.349 | -5.61 | 0.64104 | none       |
| GIGYF1   | 0.259  | 0.2139  | 1.3999 | 0.19284 | 0.35  | -5.61 | -0.5905 | none       |
| USP47    | 0.353  | 0.4502  | 1.3999 | 0.19284 | 0.35  | -5.61 | 0.66471 | none       |
| PPP1R15A | 0.281  | 0.324   | 1.3997 | 0.19289 | 0.35  | -5.61 | -0.8759 | none       |
| CELA3A   | 0.113  | 0.1133  | 1.3996 | 0.19293 | 0.35  | -5.61 | 1.67968 | none       |
| NME5     | 0.135  | 0.1084  | 1.3989 | 0.19312 | 0.35  | -5.61 | 0.40814 | none       |
| PIN4     | 0.222  | 0.1061  | 1.3986 | 0.19322 | 0.35  | -5.61 | -0.7445 | none       |
| RAD52    | 0.28   | 0.3121  | 1.3986 | 0.19323 | 0.35  | -5.61 | -0.3825 | none       |
| FNBP1    | 0.42   | 0.5034  | 1.3981 | 0.19336 | 0.35  | -5.61 | -0.5215 | none       |
| PTAR1    | -0.185 | -0.086  | -1.398 | 0.19349 | 0.351 | -5.61 | 1.93693 | none       |
| WIPF3    | 0.178  | 0.1083  | 1.3973 | 0.1936  | 0.351 | -5.61 | -1.3523 | none       |
| GSN      | 0.373  | 0.2661  | 1.3972 | 0.19364 | 0.351 | -5.61 | -0.3995 | none       |
| ATP11B   | 0.239  | 0.2704  | 1.3968 | 0.19376 | 0.351 | -5.61 | -0.8924 | none       |
| ANKDD1B  | 0.132  | 0.1322  | 1.3967 | 0.19378 | 0.351 | -5.61 | 0.76294 | none       |
| CD1B     | -0.093 | -0.0939 | -1.397 | 0.19379 | 0.351 | -5.61 | 1.01106 | none       |
| REXO4    | 0.3    | 0.3594  | 1.3957 | 0.19407 | 0.351 | -5.61 | -0.1109 | none       |
| TCIRG1   | 0.125  | 0.1317  | 1.3956 | 0.19411 | 0.351 | -5.61 | 1.38573 | none       |
| H2AFX    | -0.135 | -0.1053 | -1.396 | 0.19413 | 0.351 | -5.61 | 1.05761 | none       |
| MSN      | 0.265  | 0.3032  | 1.3955 | 0.19414 | 0.351 | -5.61 | 0.08916 | none       |
| HLA-DRA  | -0.198 | -0.1418 | -1.395 | 0.19421 | 0.351 | -5.62 | -0.1084 | none       |
| CAP2     | 0.136  | 0.1005  | 1.395  | 0.19428 | 0.352 | -5.62 | 0.42222 | none       |
| TMEM165  | 0.183  | 0.1184  | 1.395  | 0.19429 | 0.352 | -5.62 | 0.98551 | none       |
| CDC42BPB | 0.155  | 0.2407  | 1.3947 | 0.19436 | 0.352 | -5.62 | 1.3493  | none       |
| PUDP     | -0.224 | -0.2898 | -1.394 | 0.19461 | 0.352 | -5.62 | 1.75625 | none       |
| UBE2Q2   | -0.223 | -0.2011 | -1.394 | 0.19461 | 0.352 | -5.62 | 0.99529 | none       |
| GCN1     | 0.368  | 0.4612  | 1.3937 | 0.19465 | 0.352 | -5.62 | 0.29102 | none       |
| TMCO4    | 0.212  | 0.1425  | 1.3936 | 0.19469 | 0.352 | -5.62 | -0.5121 | none       |
| NRBP2    | 0.119  | 0.1118  | 1.3935 | 0.19472 | 0.352 | -5.62 | -0.5289 | none       |
| PROK2    | -0.215 | -0.2446 | -1.393 | 0.19479 | 0.352 | -5.62 | 0.56697 | none       |
| PET117   | -0.373 | -0.2246 | -1.393 | 0.19484 | 0.352 | -5.62 | 1.88904 | none       |
| OR6M1    | -0.141 | -0.0963 | -1.393 | 0.19488 | 0.352 | -5.62 | 1.29587 | none       |
| ABHD6    | 0.374  | 0.3078  | 1.3928 | 0.19491 | 0.352 | -5.62 | -0.4538 | none       |
| GDPD4    | -0.172 | -0.0363 | -1.393 | 0.19493 | 0.352 | -5.62 | -0.045  | none       |
| PPP6C    | -0.184 | -0.2118 | -1.392 | 0.19515 | 0.353 | -5.62 | 1.8931  | none       |
| WDR3     | 0.104  | 0.1015  | 1.3915 | 0.19529 | 0.353 | -5.62 | -0.032  | none       |
| FOXP3    | 0.333  | 0.4273  | 1.3914 | 0.19534 | 0.353 | -5.62 | -0.651  | none       |
| TPR      | 0.248  | 0.1987  | 1.3912 | 0.19539 | 0.353 | -5.62 | -0.5276 | none       |
| MTCL1    | -0.292 | -0.2822 | -1.391 | 0.19541 | 0.353 | -5.62 | -0.211  | none       |
| EMG1     | -0.179 | -0.2075 | -1.391 | 0.1955  | 0.353 | -5.62 | 2.19655 | AA-related |
| HINT2    | -0.194 | -0.1846 | -1.391 | 0.19551 | 0.353 | -5.62 | 1.49791 | none       |

|          |        |         |        |         |       |       |         |            |
|----------|--------|---------|--------|---------|-------|-------|---------|------------|
| APOC4    | 0.423  | 0.3698  | 1.3905 | 0.1956  | 0.353 | -5.62 | -0.7055 | none       |
| SMYD2    | 0.121  | 0.0637  | 1.3903 | 0.19566 | 0.353 | -5.62 | 0.12868 | none       |
| GPAT2    | 0.187  | 0.1911  | 1.3902 | 0.19567 | 0.353 | -5.62 | -0.415  | none       |
| RSC1A1   | 0.351  | 0.4464  | 1.3902 | 0.19568 | 0.353 | -5.62 | 1.34575 | none       |
| ABCG2    | 0.244  | 0.1518  | 1.3901 | 0.19571 | 0.353 | -5.62 | -0.394  | none       |
| PPP4R3A  | 0.284  | 0.3658  | 1.39   | 0.19575 | 0.353 | -5.62 | 0.38542 | none       |
| DRP2     | 0.116  | 0.1267  | 1.3899 | 0.19578 | 0.353 | -5.62 | 0.497   | none       |
| NLRP7    | 0.124  | 0.0994  | 1.3895 | 0.1959  | 0.353 | -5.62 | -1.062  | none       |
| MOV10    | 0.258  | 0.238   | 1.3889 | 0.19606 | 0.354 | -5.62 | -0.3921 | none       |
| RSBN1    | 0.256  | 0.189   | 1.3889 | 0.19607 | 0.354 | -5.62 | -0.3636 | none       |
| NIPAL1   | 0.202  | 0.1694  | 1.3884 | 0.1962  | 0.354 | -5.62 | -0.161  | none       |
| LRRN3    | -0.329 | -0.2347 | -1.388 | 0.19621 | 0.354 | -5.62 | 1.41089 | none       |
| ERICH2   | 0.184  | 0.2016  | 1.3883 | 0.19624 | 0.354 | -5.62 | 1.50707 | none       |
| RELT     | 0.156  | 0.1766  | 1.3882 | 0.19627 | 0.354 | -5.62 | 0.11865 | none       |
| LYRM1    | 0.198  | 0.1233  | 1.388  | 0.19633 | 0.354 | -5.62 | -0.1158 | none       |
| GIPC2    | -0.133 | -0.1632 | -1.388 | 0.19636 | 0.354 | -5.62 | 1.15935 | none       |
| MAD2L1BI | -0.174 | -0.1759 | -1.388 | 0.19645 | 0.354 | -5.62 | 2.28616 | AA-related |
| STYK1    | 0.315  | 0.2799  | 1.3871 | 0.1966  | 0.354 | -5.63 | 0.99621 | none       |
| EIF3A    | 0.477  | 0.6077  | 1.3866 | 0.19673 | 0.355 | -5.63 | 0.05341 | none       |
| ZBTB7C   | -0.137 | -0.145  | -1.386 | 0.19683 | 0.355 | -5.63 | 0.83513 | none       |
| VCPIP1   | 0.248  | 0.2436  | 1.3862 | 0.19685 | 0.355 | -5.63 | -0.0411 | none       |
| FAM47C   | 0.102  | 0.0775  | 1.3862 | 0.19687 | 0.355 | -5.63 | -1.1738 | none       |
| SNX3     | -0.172 | -0.2156 | -1.386 | 0.19689 | 0.355 | -5.63 | 0.84667 | none       |
| PFDN2    | -0.17  | -0.1059 | -1.386 | 0.19689 | 0.355 | -5.63 | 0.6002  | none       |
| SLC17A2  | 0.112  | 0.0782  | 1.386  | 0.19692 | 0.355 | -5.63 | -0.7929 | none       |
| MTRF1L   | 0.246  | 0.2777  | 1.3858 | 0.19698 | 0.355 | -5.63 | 1.15185 | none       |
| C19ORF57 | 0.183  | 0.2421  | 1.3857 | 0.197   | 0.355 | -5.63 | 0.32113 | none       |
| MAN1B1   | 0.254  | 0.2108  | 1.3855 | 0.19708 | 0.355 | -5.63 | -0.608  | none       |
| WDFY4    | -0.144 | -0.1102 | -1.385 | 0.19716 | 0.355 | -5.63 | 0.59437 | none       |
| IL1B     | -0.134 | -0.0307 | -1.385 | 0.19717 | 0.355 | -5.63 | 0.33249 | none       |
| RAD50    | 0.398  | 0.4981  | 1.3851 | 0.19718 | 0.355 | -5.63 | -0.1719 | none       |
| SIPA1L2  | 0.321  | 0.2142  | 1.3847 | 0.1973  | 0.355 | -5.63 | 0.49537 | none       |
| VPS13D   | 0.314  | 0.3828  | 1.3846 | 0.19734 | 0.355 | -5.63 | 0.31674 | none       |
| C1R      | 0.245  | 0.2137  | 1.3845 | 0.19736 | 0.355 | -5.63 | 0.55649 | none       |
| GNL1     | -0.152 | -0.1293 | -1.384 | 0.19749 | 0.355 | -5.63 | 0.16412 | none       |
| ABHD10   | -0.166 | -0.1773 | -1.384 | 0.1975  | 0.355 | -5.63 | 1.41553 | none       |
| TOR1A    | 0.139  | 0.0618  | 1.3838 | 0.19756 | 0.355 | -5.63 | -0.1485 | none       |
| CSRNP2   | 0.123  | 0.1456  | 1.3836 | 0.19764 | 0.355 | -5.63 | 0.71164 | none       |
| P3H3     | 0.423  | 0.3083  | 1.3834 | 0.19769 | 0.355 | -5.63 | -1.0084 | none       |
| IDH3B    | -0.119 | -0.1001 | -1.383 | 0.19772 | 0.355 | -5.63 | -0.3095 | none       |

|          |        |         |        |         |       |       |         |      |
|----------|--------|---------|--------|---------|-------|-------|---------|------|
| MYL3     | 0.133  | 0.1326  | 1.3833 | 0.19772 | 0.355 | -5.63 | 1.64295 | none |
| CHURC1-F | -1.09  | -0.931  | -1.383 | 0.19772 | 0.355 | -5.63 | 1.63039 | none |
| CUL1     | 0.334  | 0.3983  | 1.3833 | 0.19773 | 0.355 | -5.63 | 0.28977 | none |
| DHX38    | 0.377  | 0.4639  | 1.3832 | 0.19774 | 0.355 | -5.63 | -0.3167 | none |
| VANGL1   | 0.177  | 0.108   | 1.383  | 0.19781 | 0.355 | -5.63 | 1.50149 | none |
| SRRM3    | 0.198  | 0.1977  | 1.3829 | 0.19784 | 0.356 | -5.63 | -0.4836 | none |
| ZNF853   | 0.098  | 0.1095  | 1.3825 | 0.19794 | 0.356 | -5.63 | -0.0191 | none |
| FAM53B   | 0.191  | 0.2586  | 1.3824 | 0.19798 | 0.356 | -5.63 | 0.2214  | none |
| ZNF680   | 0.301  | 0.2629  | 1.3822 | 0.19806 | 0.356 | -5.63 | 1.03778 | none |
| COPZ1    | -0.169 | -0.2434 | -1.382 | 0.19814 | 0.356 | -5.63 | 1.81404 | none |
| TRMT44   | 0.256  | 0.3461  | 1.3818 | 0.19816 | 0.356 | -5.63 | 0.0623  | none |
| PATL2    | 0.18   | 0.1095  | 1.3815 | 0.19824 | 0.356 | -5.63 | 0.11926 | none |
| ULK1     | 0.173  | 0.1218  | 1.3815 | 0.19825 | 0.356 | -5.63 | -0.8272 | none |
| TMEM230  | 0.197  | 0.0235  | 1.3812 | 0.19834 | 0.356 | -5.63 | -0.2021 | none |
| C15ORF62 | 0.148  | 0.1852  | 1.3812 | 0.19834 | 0.356 | -5.63 | 0.75952 | none |
| THADA    | 0.135  | 0.1826  | 1.3812 | 0.19835 | 0.356 | -5.63 | 0.55974 | none |
| ACE2     | -0.115 | -0.0764 | -1.381 | 0.19839 | 0.356 | -5.63 | 1.06169 | none |
| ZNF569   | 0.308  | 0.2845  | 1.3807 | 0.19848 | 0.356 | -5.63 | 0.69584 | none |
| PTPN1    | 0.215  | 0.272   | 1.3802 | 0.19865 | 0.356 | -5.63 | -0.0654 | none |
| AP1S2    | -0.123 | -0.1332 | -1.38  | 0.19869 | 0.356 | -5.63 | 1.67776 | none |
| REC114   | 0.12   | 0.0865  | 1.38   | 0.19869 | 0.356 | -5.63 | 0.26663 | none |
| BBOF1    | -0.277 | -0.2071 | -1.38  | 0.19878 | 0.357 | -5.63 | 0.29956 | none |
| MAGED4B  | -0.307 | -0.3192 | -1.379 | 0.19887 | 0.357 | -5.63 | 1.99708 | none |
| DSCAML1  | -0.102 | -0.0879 | -1.379 | 0.19899 | 0.357 | -5.64 | 0.98639 | none |
| TUBA3E   | 0.139  | 0.0976  | 1.3787 | 0.19907 | 0.357 | -5.64 | 1.06436 | none |
| SEMA3F   | 0.227  | 0.1158  | 1.3785 | 0.19916 | 0.357 | -5.64 | 0.24954 | none |
| OAS1     | 0.164  | 0.0905  | 1.378  | 0.1993  | 0.357 | -5.64 | -0.604  | none |
| SMARCE1  | 0.303  | 0.334   | 1.3778 | 0.19936 | 0.357 | -5.64 | -0.2077 | none |
| EXOSC8   | -0.148 | -0.1309 | -1.378 | 0.19941 | 0.357 | -5.64 | 0.75509 | none |
| SPTBN1   | 0.462  | 0.6228  | 1.3775 | 0.19943 | 0.357 | -5.64 | -0.1095 | none |
| LAPTM4A  | -0.19  | -0.26   | -1.377 | 0.19948 | 0.358 | -5.64 | 1.37884 | none |
| DHX8     | 0.496  | 0.5155  | 1.3765 | 0.19974 | 0.358 | -5.64 | 0.82463 | none |
| MTX2     | -0.189 | -0.2141 | -1.376 | 0.19987 | 0.358 | -5.64 | 0.95053 | none |
| LRCH4    | -0.156 | -0.0555 | -1.376 | 0.1999  | 0.358 | -5.64 | 1.23536 | none |
| PTEN     | 0.345  | 0.3578  | 1.3759 | 0.19992 | 0.358 | -5.64 | -0.4116 | none |
| RNASE6   | 0.13   | 0.1502  | 1.3759 | 0.19993 | 0.358 | -5.64 | 0.88503 | none |
| UGCG     | 0.172  | 0.1415  | 1.3758 | 0.19995 | 0.358 | -5.64 | 0.65081 | none |
| KNOP1    | 0.353  | 0.3764  | 1.3757 | 0.19999 | 0.358 | -5.64 | -0.7083 | none |
| MPZL2    | -0.169 | -0.1969 | -1.376 | 0.20002 | 0.358 | -5.64 | 1.03547 | none |
| OTUB2    | -0.177 | -0.1681 | -1.376 | 0.20003 | 0.358 | -5.64 | 1.55217 | none |

|         |        |         |        |         |       |       |         |      |
|---------|--------|---------|--------|---------|-------|-------|---------|------|
| TMOD1   | -0.118 | -0.0741 | -1.375 | 0.20006 | 0.358 | -5.64 | 1.04203 | none |
| RHCE    | 0.127  | 0.1306  | 1.3752 | 0.20014 | 0.358 | -5.64 | 0.22265 | none |
| ATP2B4  | 0.383  | 0.3757  | 1.3752 | 0.20015 | 0.358 | -5.64 | -0.0277 | none |
| ADAM11  | -0.18  | -0.1636 | -1.375 | 0.20018 | 0.358 | -5.64 | 2.03456 | none |
| HDAC11  | 0.262  | 0.187   | 1.375  | 0.2002  | 0.358 | -5.64 | 0.55837 | none |
| GPRASP1 | 0.21   | 0.1732  | 1.3749 | 0.20023 | 0.358 | -5.64 | 0.18292 | none |
| RNF214  | -0.198 | -0.0476 | -1.375 | 0.20026 | 0.358 | -5.64 | 1.64226 | none |
| NUFIP2  | 0.286  | 0.3349  | 1.3746 | 0.20031 | 0.358 | -5.64 | -0.7949 | none |
| SMARCC1 | 0.406  | 0.4905  | 1.3746 | 0.20032 | 0.358 | -5.64 | -0.2173 | none |
| KLRG2   | 0.211  | 0.1637  | 1.3742 | 0.20045 | 0.359 | -5.64 | -0.6087 | none |
| ATOH8   | 0.154  | 0.1454  | 1.374  | 0.20049 | 0.359 | -5.64 | -0.5928 | none |
| METTL4  | -0.332 | -0.399  | -1.373 | 0.20067 | 0.359 | -5.64 | 0.85215 | none |
| PTCH1   | 0.357  | 0.3255  | 1.3733 | 0.2007  | 0.359 | -5.64 | -0.2994 | none |
| NPAS4   | 0.18   | 0.2057  | 1.3731 | 0.20076 | 0.359 | -5.64 | -0.3527 | none |
| DYSF    | 0.147  | 0.1916  | 1.3727 | 0.20088 | 0.359 | -5.64 | -0.2852 | none |
| ADNP    | 0.343  | 0.3871  | 1.3726 | 0.2009  | 0.359 | -5.64 | -0.446  | none |
| ST6GAL1 | 0.113  | -0.0061 | 1.3725 | 0.20095 | 0.359 | -5.64 | -0.6921 | none |
| TBC1D3C | 0.253  | 0.262   | 1.3724 | 0.20099 | 0.359 | -5.64 | 1.21861 | none |
| SMCO2   | 0.126  | 0.1274  | 1.3724 | 0.20099 | 0.359 | -5.64 | -0.8396 | none |
| CCDC25  | -0.121 | -0.0963 | -1.372 | 0.20103 | 0.359 | -5.64 | 1.81606 | none |
| MAGEH1  | -0.197 | -0.1964 | -1.372 | 0.20104 | 0.359 | -5.64 | 1.77697 | none |
| GLB1    | 0.152  | 0.0371  | 1.3719 | 0.20114 | 0.359 | -5.64 | 0.18363 | none |
| BMP2K   | 0.227  | 0.1877  | 1.3714 | 0.20128 | 0.359 | -5.64 | 0.65266 | none |
| CCDC22  | 0.189  | 0.1666  | 1.3714 | 0.20128 | 0.359 | -5.64 | 0.62332 | none |
| CETN2   | -0.256 | -0.2572 | -1.371 | 0.20129 | 0.359 | -5.64 | 1.8451  | none |
| TESK2   | -0.153 | -0.1022 | -1.371 | 0.20131 | 0.359 | -5.65 | 0.30328 | none |
| DNTTIP2 | 0.495  | 0.6215  | 1.3712 | 0.20134 | 0.359 | -5.65 | 0.04931 | none |
| TUFM    | -0.127 | -0.0804 | -1.371 | 0.20144 | 0.36  | -5.65 | 1.57    | none |
| PRPSAP1 | 0.174  | 0.1379  | 1.3707 | 0.20148 | 0.36  | -5.65 | -0.1272 | none |
| LMF2    | -0.14  | -0.133  | -1.371 | 0.20153 | 0.36  | -5.65 | 1.08542 | none |
| FAM173A | 0.293  | 0.2266  | 1.3706 | 0.20153 | 0.36  | -5.65 | 1.02733 | none |
| CNNM1   | 0.121  | 0.1303  | 1.3703 | 0.20159 | 0.36  | -5.65 | -0.7421 | none |
| PEA15   | 0.242  | 0.3254  | 1.3703 | 0.2016  | 0.36  | -5.65 | 0.02833 | none |
| CEP97   | 0.339  | 0.3086  | 1.3701 | 0.20168 | 0.36  | -5.65 | -0.3764 | none |
| RBM14   | 0.121  | 0.0953  | 1.37   | 0.2017  | 0.36  | -5.65 | 0.16686 | none |
| GANAB   | 0.186  | 0.1715  | 1.3697 | 0.2018  | 0.36  | -5.65 | -0.3986 | none |
| RBM24   | 0.125  | 0.1515  | 1.3695 | 0.20185 | 0.36  | -5.65 | 0.8345  | none |
| TRIM24  | 0.399  | 0.4866  | 1.3691 | 0.20197 | 0.36  | -5.65 | 0.33521 | none |
| MEF2C   | -0.398 | -0.3587 | -1.369 | 0.20198 | 0.36  | -5.65 | 1.27254 | none |
| LPCAT4  | 0.242  | 0.2239  | 1.3691 | 0.20198 | 0.36  | -5.65 | -0.557  | none |



|          |        |         |        |         |       |       |         |      |
|----------|--------|---------|--------|---------|-------|-------|---------|------|
| DENND6B  | 0.235  | 0.1929  | 1.369  | 0.20199 | 0.36  | -5.65 | -0.0793 | none |
| PLCG2    | 0.306  | 0.3213  | 1.3685 | 0.20214 | 0.36  | -5.65 | -0.019  | none |
| DEXI     | 0.206  | 0.2128  | 1.368  | 0.20232 | 0.361 | -5.65 | 1.74513 | none |
| CHRD2    | 0.09   | 0.0892  | 1.3678 | 0.20238 | 0.361 | -5.65 | -0.8356 | none |
| CAPSL    | 0.135  | 0.1351  | 1.3677 | 0.20239 | 0.361 | -5.65 | 1.27608 | none |
| NAPEPLD  | 0.163  | 0.1931  | 1.3675 | 0.20244 | 0.361 | -5.65 | -0.4272 | none |
| MASTL    | 0.208  | 0.2101  | 1.3669 | 0.20263 | 0.361 | -5.65 | 0.25101 | none |
| SCGB1C1  | 0.138  | 0.1384  | 1.3666 | 0.20272 | 0.361 | -5.65 | 1.04011 | none |
| LRP10    | 0.101  | 0.0614  | 1.3666 | 0.20274 | 0.361 | -5.65 | -0.3684 | none |
| TMEM74B  | 0.315  | 0.215   | 1.3665 | 0.20275 | 0.361 | -5.65 | -0.901  | none |
| BARX1    | -0.149 | -0.1123 | -1.366 | 0.20278 | 0.361 | -5.65 | 0.82041 | none |
| ABHD8    | -0.184 | -0.1119 | -1.366 | 0.20287 | 0.361 | -5.65 | 1.09133 | none |
| ZNF251   | 0.182  | 0.1531  | 1.3661 | 0.20289 | 0.361 | -5.65 | -0.2535 | none |
| OR2M7    | -0.112 | -0.0749 | -1.366 | 0.20299 | 0.361 | -5.65 | 0.86195 | none |
| OR7G3    | -0.112 | -0.0749 | -1.366 | 0.20299 | 0.361 | -5.65 | 1.39014 | none |
| BSCL2    | 0.258  | 0.1164  | 1.3655 | 0.20305 | 0.361 | -5.65 | -0.4077 | none |
| C19ORF48 | 0.124  | 0.1295  | 1.3653 | 0.20313 | 0.362 | -5.65 | -1.0653 | none |
| CEP41    | 0.128  | 0.0908  | 1.3651 | 0.20318 | 0.362 | -5.65 | -1.1168 | none |
| ARMT1    | 0.139  | 0.0685  | 1.3648 | 0.20327 | 0.362 | -5.65 | 0.6948  | none |
| CARS     | -0.246 | -0.138  | -1.364 | 0.20339 | 0.362 | -5.65 | 1.74175 | none |
| OFCC1    | 0.25   | 0.1968  | 1.3642 | 0.20346 | 0.362 | -5.65 | -0.9503 | none |
| PPP6R2   | 0.281  | 0.3345  | 1.3642 | 0.20346 | 0.362 | -5.65 | 0.58835 | none |
| TMEM173  | 0.136  | 0.0764  | 1.3641 | 0.20349 | 0.362 | -5.65 | -1.0757 | none |
| CYP4F12  | 0.208  | 0.143   | 1.3636 | 0.20365 | 0.362 | -5.65 | -0.9757 | none |
| TCF20    | 0.177  | 0.2293  | 1.3635 | 0.20367 | 0.362 | -5.65 | -0.1272 | none |
| JTB      | -0.229 | -0.2279 | -1.363 | 0.20374 | 0.362 | -5.65 | 1.12433 | none |
| AXIN1    | 0.323  | 0.3381  | 1.3629 | 0.20384 | 0.362 | -5.66 | -1.0148 | none |
| MRPS18B  | 0.15   | 0.0581  | 1.3627 | 0.2039  | 0.362 | -5.66 | -0.7927 | none |
| GPD2     | -0.153 | -0.0904 | -1.362 | 0.204   | 0.363 | -5.66 | 0.78374 | none |
| MEIKIN   | -0.25  | -0.2382 | -1.362 | 0.2041  | 0.363 | -5.66 | 0.9378  | none |
| TIMM9    | -0.218 | -0.2516 | -1.362 | 0.2041  | 0.363 | -5.66 | 0.90454 | none |
| PSMD1    | 0.3    | 0.3425  | 1.362  | 0.20413 | 0.363 | -5.66 | 0.25871 | none |
| SLC39A6  | 0.204  | 0.2017  | 1.3614 | 0.2043  | 0.363 | -5.66 | 0.30899 | none |
| FOXO4    | 0.286  | 0.2657  | 1.3613 | 0.20433 | 0.363 | -5.66 | -0.8507 | none |
| TIMM50   | 0.171  | 0.099   | 1.3612 | 0.20438 | 0.363 | -5.66 | -0.7582 | none |
| IRF4     | 0.278  | 0.3228  | 1.3608 | 0.20449 | 0.363 | -5.66 | -0.7843 | none |
| PEX11B   | -0.177 | -0.2186 | -1.361 | 0.2045  | 0.363 | -5.66 | 1.34529 | none |
| SREBF1   | 0.166  | 0.2648  | 1.3608 | 0.2045  | 0.363 | -5.66 | -0.6112 | none |
| PNPLA4   | -0.306 | -0.2878 | -1.361 | 0.20452 | 0.363 | -5.66 | 0.8446  | none |
| TREM1    | -0.131 | -0.1102 | -1.361 | 0.20457 | 0.363 | -5.66 | 1.45407 | none |

|          |        |         |        |         |       |       |         |            |
|----------|--------|---------|--------|---------|-------|-------|---------|------------|
| BSPRY    | 0.157  | 0.1304  | 1.3602 | 0.20467 | 0.363 | -5.66 | 0.66977 | none       |
| DKKL1    | 0.131  | 0.1307  | 1.3599 | 0.20476 | 0.363 | -5.66 | -0.6614 | none       |
| ANP32B   | -0.137 | -0.0516 | -1.36  | 0.20477 | 0.363 | -5.66 | 1.65203 | none       |
| P4HB     | -0.141 | -0.0844 | -1.359 | 0.20495 | 0.364 | -5.66 | 1.68334 | none       |
| NKX6-2   | -0.146 | -0.0864 | -1.359 | 0.20502 | 0.364 | -5.66 | 2.26338 | AA-related |
| LIPT2    | -0.195 | -0.1336 | -1.359 | 0.20505 | 0.364 | -5.66 | 1.54292 | none       |
| NCOA4    | 0.114  | 0.0621  | 1.3585 | 0.2052  | 0.364 | -5.66 | 0.67982 | none       |
| NAF1     | 0.232  | 0.1851  | 1.3585 | 0.20521 | 0.364 | -5.66 | 0.21824 | none       |
| GYG1     | 0.155  | 0.0288  | 1.3583 | 0.20524 | 0.364 | -5.66 | 0.32873 | none       |
| ST20-MTH | 0.509  | 0.4032  | 1.358  | 0.20535 | 0.364 | -5.66 | -0.6676 | none       |
| SMC4     | 0.52   | 0.6967  | 1.3578 | 0.20541 | 0.364 | -5.66 | -0.1209 | none       |
| EGLN1    | 0.164  | 0.1058  | 1.3578 | 0.20542 | 0.364 | -5.66 | -0.4781 | none       |
| TRA2A    | 0.136  | 0.0793  | 1.3577 | 0.20545 | 0.364 | -5.66 | -0.385  | none       |
| PPM1J    | -0.115 | -0.0549 | -1.357 | 0.20566 | 0.365 | -5.66 | 0.97409 | none       |
| MEF2D    | 0.207  | 0.1958  | 1.3569 | 0.20568 | 0.365 | -5.66 | -0.336  | none       |
| CRACR2A  | 0.221  | 0.3332  | 1.3568 | 0.20571 | 0.365 | -5.66 | 0.41926 | none       |
| DPYSL4   | 0.16   | 0.1805  | 1.3568 | 0.20572 | 0.365 | -5.66 | 0.2219  | none       |
| PHOSPHO  | -0.166 | -0.1451 | -1.356 | 0.20583 | 0.365 | -5.66 | 0.85053 | none       |
| ZNF41    | 0.275  | 0.3661  | 1.3562 | 0.20589 | 0.365 | -5.66 | 0.2997  | none       |
| FOXA1    | 0.13   | 0.176   | 1.356  | 0.20597 | 0.365 | -5.66 | 0.12838 | none       |
| CCDC134  | 0.15   | 0.1297  | 1.3553 | 0.20617 | 0.365 | -5.66 | 0.45159 | none       |
| MPP1     | 0.133  | 0.1335  | 1.3552 | 0.2062  | 0.365 | -5.66 | 0.34223 | none       |
| HEBP1    | 0.16   | 0.1453  | 1.3551 | 0.20625 | 0.365 | -5.67 | 1.12054 | none       |
| POLR3F   | -0.262 | -0.2362 | -1.355 | 0.20634 | 0.365 | -5.67 | 1.01058 | none       |
| SPOPL    | -0.227 | -0.1919 | -1.355 | 0.20639 | 0.365 | -5.67 | 0.2005  | none       |
| SPAG1    | 0.344  | 0.2672  | 1.3544 | 0.20647 | 0.366 | -5.67 | -0.8675 | none       |
| GRIA4    | -0.184 | -0.146  | -1.354 | 0.20647 | 0.366 | -5.67 | 1.37981 | none       |
| REPIN1   | 0.172  | 0.2039  | 1.3542 | 0.20652 | 0.366 | -5.67 | #####   | none       |
| MDH2     | -0.117 | -0.0963 | -1.354 | 0.20654 | 0.366 | -5.67 | 1.79169 | none       |
| GPR89B   | -0.31  | -0.2629 | -1.354 | 0.20659 | 0.366 | -5.67 | 2.09272 | AA-related |
| GCA      | 0.186  | 0.0239  | 1.3539 | 0.20662 | 0.366 | -5.67 | 0.35601 | none       |
| TEX30    | -0.242 | -0.2748 | -1.354 | 0.20669 | 0.366 | -5.67 | 0.84732 | none       |
| C1QA     | -0.111 | -0.0737 | -1.354 | 0.20672 | 0.366 | -5.67 | -0.029  | none       |
| RNFT1    | -0.292 | -0.3377 | -1.353 | 0.20675 | 0.366 | -5.67 | 1.40775 | none       |
| IFI27L2  | -0.262 | -0.2506 | -1.353 | 0.20678 | 0.366 | -5.67 | 1.59715 | none       |
| SLC25A38 | -0.152 | -0.127  | -1.353 | 0.20683 | 0.366 | -5.67 | 1.08497 | none       |
| CENPF    | 0.202  | 0.3272  | 1.3531 | 0.20685 | 0.366 | -5.67 | 0.1286  | none       |
| KCNK16   | -0.108 | -0.0877 | -1.353 | 0.20688 | 0.366 | -5.67 | 0.7405  | none       |
| ELMO3    | 0.172  | 0.2064  | 1.3525 | 0.20704 | 0.366 | -5.67 | 0.04998 | none       |
| PAQR6    | 0.142  | 0.1134  | 1.352  | 0.20718 | 0.366 | -5.67 | -0.2669 | none       |

|          |        |         |        |         |       |       |         |      |
|----------|--------|---------|--------|---------|-------|-------|---------|------|
| REEP3    | 0.192  | 0.0624  | 1.3519 | 0.20724 | 0.366 | -5.67 | -0.9083 | none |
| CDK18    | 0.439  | 0.391   | 1.3512 | 0.20743 | 0.367 | -5.67 | -0.1997 | none |
| CEP131   | 0.281  | 0.285   | 1.3511 | 0.20747 | 0.367 | -5.67 | -0.7835 | none |
| KIF5B    | 0.468  | 0.5793  | 1.3506 | 0.20761 | 0.367 | -5.67 | 0.19187 | none |
| TCTE3    | 0.093  | 0.0651  | 1.3504 | 0.20768 | 0.367 | -5.67 | -0.4132 | none |
| TOMM5    | -0.187 | -0.208  | -1.35  | 0.20769 | 0.367 | -5.67 | 0.40623 | none |
| ETNK2    | 0.276  | 0.272   | 1.3504 | 0.2077  | 0.367 | -5.67 | -0.5767 | none |
| CBFB     | 0.191  | 0.1271  | 1.3503 | 0.20771 | 0.367 | -5.67 | -0.2851 | none |
| NLRC4    | -0.095 | -0.069  | -1.35  | 0.20779 | 0.367 | -5.67 | 1.663   | none |
| ADCY10   | 0.141  | 0.0974  | 1.3496 | 0.20795 | 0.367 | -5.67 | -0.7117 | none |
| ZNF202   | 0.227  | 0.2489  | 1.3494 | 0.20799 | 0.367 | -5.67 | 0.74046 | none |
| IQCA1    | 0.12   | 0.1154  | 1.3493 | 0.20801 | 0.367 | -5.67 | 0.28803 | none |
| ATP10A   | 0.408  | 0.3789  | 1.349  | 0.20812 | 0.367 | -5.67 | -0.4104 | none |
| PRMT1    | 0.148  | 0.0883  | 1.3489 | 0.20814 | 0.367 | -5.67 | -0.6261 | none |
| C1ORF131 | 0.187  | 0.195   | 1.3489 | 0.20814 | 0.367 | -5.67 | -0.6899 | none |
| CBLN2    | -0.127 | -0.1268 | -1.349 | 0.20819 | 0.367 | -5.67 | 0.14088 | none |
| PLVAP    | 0.173  | 0.1594  | 1.3487 | 0.2082  | 0.367 | -5.67 | -0.8096 | none |
| MTERF3   | 0.176  | 0.1061  | 1.3484 | 0.20832 | 0.368 | -5.67 | -0.4812 | none |
| MYO5C    | 0.18   | 0.0884  | 1.3476 | 0.20856 | 0.368 | -5.67 | 0.80926 | none |
| PDRG1    | -0.115 | -0.0565 | -1.347 | 0.20865 | 0.368 | -5.67 | 1.43956 | none |
| GALNS    | 0.165  | 0.114   | 1.3473 | 0.20866 | 0.368 | -5.67 | -0.4658 | none |
| LDLRAP1  | 0.133  | 0.0781  | 1.346  | 0.20906 | 0.369 | -5.68 | -0.5125 | none |
| ZDHHC19  | -0.114 | -0.085  | -1.346 | 0.20906 | 0.369 | -5.68 | 0.84676 | none |
| CNRIP1   | 0.104  | 0.0968  | 1.3457 | 0.20916 | 0.369 | -5.68 | -0.2304 | none |
| RFX6     | -0.105 | -0.0725 | -1.345 | 0.20944 | 0.369 | -5.68 | 0.8909  | none |
| TMEM242  | 0.1    | 0.095   | 1.3443 | 0.20958 | 0.37  | -5.68 | -0.0972 | none |
| POF1B    | -0.092 | -0.0732 | -1.344 | 0.20962 | 0.37  | -5.68 | 0.72809 | none |
| KRTAP4-3 | -0.109 | -0.0728 | -1.344 | 0.20968 | 0.37  | -5.68 | 0.86195 | none |
| MFHAS1   | 0.192  | 0.2128  | 1.3436 | 0.20981 | 0.37  | -5.68 | 0.80585 | none |
| TTYH2    | 0.269  | 0.1665  | 1.3435 | 0.20983 | 0.37  | -5.68 | -0.1108 | none |
| CYP2C9   | 0.196  | 0.1363  | 1.3432 | 0.20992 | 0.37  | -5.68 | -0.5916 | none |
| NLRX1    | 0.331  | 0.3037  | 1.3432 | 0.20993 | 0.37  | -5.68 | -0.4861 | none |
| XRCC3    | 0.167  | 0.1657  | 1.3431 | 0.20997 | 0.37  | -5.68 | -0.3724 | none |
| PATE1    | 0.148  | 0.1587  | 1.3429 | 0.21001 | 0.37  | -5.68 | 0.23544 | none |
| DIO2     | 0.19   | 0.238   | 1.3428 | 0.21004 | 0.37  | -5.68 | 0.90001 | none |
| FANK1    | 0.217  | 0.0826  | 1.3426 | 0.21012 | 0.37  | -5.68 | -1.0008 | none |
| PDZD4    | 0.126  | 0.136   | 1.3418 | 0.21035 | 0.37  | -5.68 | 0.38524 | none |
| TECR     | -0.143 | -0.1813 | -1.342 | 0.21035 | 0.37  | -5.68 | 1.75867 | none |
| CAMP     | 0.107  | 0.1067  | 1.3418 | 0.21037 | 0.37  | -5.68 | -0.7439 | none |
| NAA10    | -0.124 | -0.0714 | -1.342 | 0.21039 | 0.37  | -5.68 | 1.90188 | none |

|         |        |         |        |         |       |       |         |            |
|---------|--------|---------|--------|---------|-------|-------|---------|------------|
| NXNL1   | 0.262  | 0.2007  | 1.3417 | 0.2104  | 0.37  | -5.68 | 0.30997 | none       |
| ZNF281  | 0.336  | 0.3375  | 1.3413 | 0.21051 | 0.371 | -5.68 | 0.5609  | none       |
| MSC     | 0.237  | 0.2603  | 1.3413 | 0.21052 | 0.371 | -5.68 | 1.5101  | none       |
| ZNF443  | -0.195 | -0.1323 | -1.341 | 0.21063 | 0.371 | -5.68 | 1.82823 | none       |
| CBWD3   | -0.208 | -0.2538 | -1.341 | 0.21064 | 0.371 | -5.68 | -0.1705 | none       |
| EIF3L   | -0.105 | -0.1135 | -1.341 | 0.21066 | 0.371 | -5.68 | 1.69793 | none       |
| XCR1    | 0.73   | 0.5515  | 1.3405 | 0.21078 | 0.371 | -5.68 | 0.24042 | none       |
| U2SURP  | 0.336  | 0.4381  | 1.34   | 0.21093 | 0.371 | -5.68 | -0.3047 | none       |
| ICK     | 0.258  | 0.2865  | 1.3397 | 0.21103 | 0.371 | -5.68 | 0.31446 | none       |
| C6ORF62 | 0.181  | 0.171   | 1.3394 | 0.2111  | 0.371 | -5.68 | -0.8722 | none       |
| DLEC1   | 0.373  | 0.293   | 1.3393 | 0.21114 | 0.371 | -5.68 | -0.713  | none       |
| SECTM1  | -0.36  | -0.1848 | -1.339 | 0.21114 | 0.371 | -5.68 | 0.88415 | none       |
| GRAMD1B | 0.291  | 0.3909  | 1.3392 | 0.21116 | 0.371 | -5.68 | -0.3248 | none       |
| BCKDK   | -0.151 | -0.1068 | -1.339 | 0.21122 | 0.371 | -5.68 | 1.81757 | none       |
| FIGN    | -0.105 | -0.0851 | -1.339 | 0.21122 | 0.371 | -5.68 | 2.13142 | AA-related |
| SMIM24  | -0.25  | -0.2279 | -1.339 | 0.21122 | 0.371 | -5.68 | 1.63391 | none       |
| IFITM2  | 0.123  | 0.0576  | 1.3385 | 0.2114  | 0.372 | -5.69 | 0.1     | none       |
| USP2    | 0.21   | 0.2276  | 1.338  | 0.21155 | 0.372 | -5.69 | 0.02054 | none       |
| ST20    | 0.276  | 0.1528  | 1.338  | 0.21155 | 0.372 | -5.69 | 0.17519 | none       |
| RRP1B   | 0.337  | 0.4661  | 1.338  | 0.21155 | 0.372 | -5.69 | 0.35753 | none       |
| USP45   | 0.254  | 0.1359  | 1.3372 | 0.2118  | 0.372 | -5.69 | -0.2525 | none       |
| PHB     | -0.138 | -0.1133 | -1.337 | 0.21189 | 0.372 | -5.69 | 0.6655  | none       |
| CSHL1   | 0.112  | 0.1116  | 1.3367 | 0.21196 | 0.372 | -5.69 | 0.20808 | none       |
| MYBBP1A | 0.314  | 0.42    | 1.3367 | 0.21197 | 0.372 | -5.69 | -0.1223 | none       |
| PSMA6   | -0.166 | -0.2145 | -1.337 | 0.21199 | 0.372 | -5.69 | 0.89078 | none       |
| MAGEF1  | -0.15  | -0.0566 | -1.337 | 0.21199 | 0.372 | -5.69 | 1.31783 | none       |
| COLCA2  | -0.1   | -0.082  | -1.337 | 0.21202 | 0.372 | -5.69 | 1.59588 | none       |
| RRP7A   | -0.146 | -0.0449 | -1.336 | 0.2121  | 0.372 | -5.69 | 0.04505 | none       |
| ANKRD52 | 0.439  | 0.5082  | 1.3357 | 0.21227 | 0.373 | -5.69 | -0.1201 | none       |
| VWDE    | -0.119 | -0.0795 | -1.336 | 0.21227 | 0.373 | -5.69 | 1.90725 | none       |
| PLA2G4B | 0.229  | 0.199   | 1.3352 | 0.21244 | 0.373 | -5.69 | -0.6131 | none       |
| ADGRE1  | -0.213 | -0.2305 | -1.335 | 0.21246 | 0.373 | -5.69 | 0.7833  | none       |
| FBXO25  | -0.156 | -0.185  | -1.335 | 0.21251 | 0.373 | -5.69 | 1.40839 | none       |
| ZNF280C | 0.262  | 0.2346  | 1.335  | 0.21251 | 0.373 | -5.69 | -0.525  | none       |
| PLEKHG5 | 0.241  | 0.1711  | 1.3349 | 0.21254 | 0.373 | -5.69 | -1.0223 | none       |
| CAAP1   | 0.201  | 0.1697  | 1.3348 | 0.21257 | 0.373 | -5.69 | 0.44424 | none       |
| ACTN2   | -0.182 | -0.2294 | -1.335 | 0.21264 | 0.373 | -5.69 | 0.21121 | none       |
| TLN1    | 0.481  | 0.6297  | 1.3343 | 0.2127  | 0.373 | -5.69 | -0.5042 | none       |
| CAPZB   | -0.135 | -0.0679 | -1.334 | 0.21279 | 0.373 | -5.69 | 1.83818 | none       |
| CCAR2   | 0.207  | 0.2393  | 1.3341 | 0.2128  | 0.373 | -5.69 | 0.14629 | none       |

|          |        |         |        |         |       |       |         |            |
|----------|--------|---------|--------|---------|-------|-------|---------|------------|
| NR4A3    | 0.223  | 0.2658  | 1.333  | 0.21314 | 0.374 | -5.69 | -0.4799 | none       |
| ZNF71    | 0.126  | 0.1039  | 1.3329 | 0.21317 | 0.374 | -5.69 | 0.30209 | none       |
| E2F4     | 0.119  | 0.1482  | 1.3326 | 0.21324 | 0.374 | -5.69 | 0.33776 | none       |
| TACO1    | 0.124  | 0.0657  | 1.3325 | 0.21327 | 0.374 | -5.69 | 1.00818 | none       |
| CYP3A4   | 0.156  | 0.1185  | 1.3324 | 0.2133  | 0.374 | -5.69 | 0.51041 | none       |
| FAM118B  | -0.344 | -0.3037 | -1.332 | 0.21334 | 0.374 | -5.69 | 2.13181 | AA-related |
| SSR3     | -0.241 | -0.3105 | -1.332 | 0.21341 | 0.374 | -5.69 | 1.14385 | none       |
| GOLGA8N  | 0.122  | 0.1348  | 1.3321 | 0.21343 | 0.374 | -5.69 | -0.0099 | none       |
| AC011043 | 0.11   | 0.0831  | 1.3318 | 0.21351 | 0.374 | -5.69 | -0.0687 | none       |
| AC011841 | 0.11   | 0.0831  | 1.3318 | 0.21351 | 0.374 | -5.69 | -0.0687 | none       |
| KIAA0930 | 0.324  | 0.3218  | 1.3318 | 0.21352 | 0.374 | -5.69 | 0.51889 | none       |
| SIK3     | 0.299  | 0.2475  | 1.3318 | 0.21352 | 0.374 | -5.69 | -0.7342 | none       |
| RBM3     | -0.193 | -0.2652 | -1.331 | 0.21364 | 0.374 | -5.69 | 0.81708 | none       |
| PCDHA11  | 0.112  | 0.1185  | 1.3313 | 0.21366 | 0.374 | -5.69 | -0.2036 | none       |
| MOG      | 0.37   | 0.2893  | 1.3313 | 0.21368 | 0.374 | -5.69 | 1.00811 | none       |
| FGF3     | -0.096 | -0.0729 | -1.331 | 0.21373 | 0.374 | -5.69 | 0.0339  | none       |
| TEX29    | 0.242  | 0.1626  | 1.3308 | 0.21384 | 0.374 | -5.69 | -0.566  | none       |
| CDC5L    | 0.353  | 0.3805  | 1.3306 | 0.2139  | 0.374 | -5.69 | -0.1871 | none       |
| C22ORF31 | 0.147  | 0.1038  | 1.3304 | 0.21396 | 0.374 | -5.7  | -0.1693 | none       |
| ZNF362   | 0.321  | 0.3432  | 1.33   | 0.21407 | 0.375 | -5.7  | 0.6951  | none       |
| CHAT     | -0.095 | -0.091  | -1.33  | 0.21417 | 0.375 | -5.7  | 1.80806 | none       |
| ZNF784   | 0.1    | 0.1131  | 1.3297 | 0.21419 | 0.375 | -5.7  | 0.90507 | none       |
| OCIAD1   | 0.146  | 0.066   | 1.3295 | 0.21423 | 0.375 | -5.7  | -0.3728 | none       |
| COX5B    | -0.215 | -0.2465 | -1.329 | 0.21438 | 0.375 | -5.7  | 0.90216 | none       |
| TAF1C    | 0.165  | 0.1715  | 1.3288 | 0.21445 | 0.375 | -5.7  | 0.09505 | none       |
| ACY1     | 0.19   | 0.1204  | 1.3285 | 0.21456 | 0.375 | -5.7  | 0.25487 | none       |
| TAX1BP1  | 0.496  | 0.5792  | 1.3285 | 0.21457 | 0.375 | -5.7  | -0.0301 | none       |
| CA9      | 0.209  | 0.1266  | 1.3283 | 0.21462 | 0.375 | -5.7  | 0.91896 | none       |
| EPHX1    | -0.224 | -0.1986 | -1.328 | 0.21479 | 0.375 | -5.7  | 0.18548 | none       |
| ZNF709   | 0.171  | 0.1725  | 1.3277 | 0.21481 | 0.375 | -5.7  | 1.49993 | none       |
| PRR4     | -0.31  | -0.232  | -1.327 | 0.21494 | 0.376 | -5.7  | 1.5613  | none       |
| STARD4   | -0.199 | -0.2402 | -1.327 | 0.21498 | 0.376 | -5.7  | -0.1193 | none       |
| FNDC3B   | 0.269  | 0.2238  | 1.3271 | 0.215   | 0.376 | -5.7  | -0.3269 | none       |
| PLPPR2   | 0.122  | -0.0194 | 1.327  | 0.21504 | 0.376 | -5.7  | -0.639  | none       |
| ITM2B    | -0.196 | -0.2788 | -1.327 | 0.21506 | 0.376 | -5.7  | 1.09639 | none       |
| ACTL6A   | -0.124 | -0.1576 | -1.327 | 0.21514 | 0.376 | -5.7  | 0.7015  | none       |
| CYP2U1   | 0.126  | 0.0724  | 1.3261 | 0.21531 | 0.376 | -5.7  | -0.1171 | none       |
| ZSCAN31  | -0.24  | -0.2381 | -1.326 | 0.21534 | 0.376 | -5.7  | 0.35409 | none       |
| NXF2B    | -0.101 | -0.0801 | -1.326 | 0.21534 | 0.376 | -5.7  | 1.3115  | none       |
| LENEP    | -0.12  | -0.0692 | -1.326 | 0.21547 | 0.376 | -5.7  | 1.07509 | none       |

|          |        |         |        |         |       |       |         |      |
|----------|--------|---------|--------|---------|-------|-------|---------|------|
| ODF3L2   | 0.173  | 0.1938  | 1.3255 | 0.2155  | 0.376 | -5.7  | 0.43568 | none |
| MROH6    | 0.116  | 0.1493  | 1.3252 | 0.21561 | 0.376 | -5.7  | 1.02596 | none |
| ARHGEF5  | 0.323  | 0.2235  | 1.3251 | 0.21563 | 0.376 | -5.7  | -0.8953 | none |
| SDC2     | 0.163  | 0.1538  | 1.3248 | 0.21573 | 0.377 | -5.7  | 0.50579 | none |
| POLR2I   | -0.205 | -0.2154 | -1.325 | 0.21581 | 0.377 | -5.7  | 0.37588 | none |
| ACYP1    | 0.193  | 0.139   | 1.3241 | 0.21594 | 0.377 | -5.7  | -0.2174 | none |
| PYY      | 0.119  | 0.1219  | 1.3241 | 0.21596 | 0.377 | -5.7  | 0.35764 | none |
| GJA1     | 0.094  | 0.0836  | 1.3241 | 0.21597 | 0.377 | -5.7  | -0.005  | none |
| PORCN    | 0.289  | 0.1854  | 1.3239 | 0.21602 | 0.377 | -5.7  | 0.20879 | none |
| RASGEF1C | -0.246 | -0.1718 | -1.323 | 0.2163  | 0.377 | -5.7  | 1.92758 | none |
| PHKA1    | 0.173  | 0.2437  | 1.3229 | 0.21636 | 0.377 | -5.7  | 0.63155 | none |
| SNX32    | -0.123 | -0.0202 | -1.323 | 0.2164  | 0.377 | -5.7  | 1.02741 | none |
| PFDN5    | -0.177 | -0.2312 | -1.322 | 0.21657 | 0.378 | -5.71 | 0.97732 | none |
| CABP7    | -0.109 | -0.0728 | -1.322 | 0.21658 | 0.378 | -5.71 | 1.56517 | none |
| CPNE9    | 0.172  | 0.1799  | 1.3216 | 0.21675 | 0.378 | -5.71 | 0.365   | none |
| MFNG     | -0.143 | -0.1101 | -1.322 | 0.21679 | 0.378 | -5.71 | 1.47435 | none |
| DLX4     | -0.129 | -0.1269 | -1.321 | 0.2169  | 0.378 | -5.71 | 1.46844 | none |
| BTG2     | -0.143 | -0.0873 | -1.321 | 0.21708 | 0.378 | -5.71 | 1.33754 | none |
| MRPS14   | -0.166 | -0.2162 | -1.32  | 0.21713 | 0.378 | -5.71 | 1.34971 | none |
| CFAP20   | -0.121 | -0.1484 | -1.32  | 0.21715 | 0.378 | -5.71 | 1.27241 | none |
| UPF3B    | 0.33   | 0.4047  | 1.3201 | 0.21725 | 0.379 | -5.71 | -0.1283 | none |
| PLK4     | 0.37   | 0.3286  | 1.32   | 0.21728 | 0.379 | -5.71 | -0.8891 | none |
| PSMB6    | -0.21  | -0.2281 | -1.32  | 0.21735 | 0.379 | -5.71 | 0.17873 | none |
| GYG2     | -0.099 | -0.0697 | -1.32  | 0.21738 | 0.379 | -5.71 | 0.55601 | none |
| SYNGR4   | 0.184  | 0.2247  | 1.319  | 0.2176  | 0.379 | -5.71 | 0.40947 | none |
| TSEN34   | 0.267  | 0.1246  | 1.3188 | 0.21765 | 0.379 | -5.71 | 0.33111 | none |
| TPSG1    | -0.121 | -0.1205 | -1.319 | 0.21769 | 0.379 | -5.71 | 0.71194 | none |
| RASGRP1  | 0.279  | 0.3359  | 1.3185 | 0.21774 | 0.379 | -5.71 | 0.05802 | none |
| LRP5L    | 0.146  | 0.1532  | 1.3183 | 0.21782 | 0.379 | -5.71 | -0.5823 | none |
| SLC52A2  | -0.181 | -0.1656 | -1.318 | 0.21787 | 0.379 | -5.71 | 0.96825 | none |
| HM13     | 0.118  | 0.0878  | 1.3178 | 0.21799 | 0.379 | -5.71 | -1.1285 | none |
| PRKAG3   | -0.141 | -0.1235 | -1.318 | 0.21806 | 0.379 | -5.71 | -0.251  | none |
| FLII     | 0.339  | 0.3832  | 1.3172 | 0.21818 | 0.38  | -5.71 | 0.24005 | none |
| AHNAK    | 0.321  | 0.4298  | 1.3171 | 0.21822 | 0.38  | -5.71 | -0.3669 | none |
| MS4A6A   | -0.232 | -0.1866 | -1.317 | 0.21832 | 0.38  | -5.71 | 1.76788 | none |
| A3GALT2  | -0.112 | -0.1122 | -1.316 | 0.21843 | 0.38  | -5.71 | 1.38436 | none |
| MARS     | 0.108  | 0.0832  | 1.3164 | 0.21843 | 0.38  | -5.71 | 0.40403 | none |
| RNF186   | 0.106  | 0.1063  | 1.3164 | 0.21844 | 0.38  | -5.71 | -0.143  | none |
| CD14     | 0.163  | 0.1128  | 1.3164 | 0.21844 | 0.38  | -5.71 | 1.36652 | none |
| GJB5     | 0.093  | 0.0763  | 1.3162 | 0.21851 | 0.38  | -5.71 | -1.0813 | none |

|          |        |         |        |         |       |       |         |            |
|----------|--------|---------|--------|---------|-------|-------|---------|------------|
| GZMA     | -0.261 | -0.2816 | -1.316 | 0.21855 | 0.38  | -5.71 | 1.8467  | none       |
| ZNF699   | 0.157  | 0.1473  | 1.3158 | 0.21864 | 0.38  | -5.71 | -0.547  | none       |
| ELOVL1   | -0.149 | -0.1774 | -1.316 | 0.21868 | 0.38  | -5.71 | 1.09265 | none       |
| ADCK5    | 0.185  | 0.1262  | 1.3156 | 0.2187  | 0.38  | -5.71 | -0.9075 | none       |
| ATP6V1F  | -0.179 | -0.2263 | -1.315 | 0.2188  | 0.38  | -5.71 | 1.68228 | none       |
| PTPMT1   | -0.153 | -0.1303 | -1.315 | 0.21883 | 0.38  | -5.71 | 2.25217 | AA-related |
| EVPL     | 0.31   | 0.3266  | 1.315  | 0.21887 | 0.38  | -5.71 | 0.90527 | none       |
| CUL5     | 0.235  | 0.2462  | 1.3149 | 0.21891 | 0.38  | -5.71 | 1.01116 | none       |
| RIOK2    | 0.141  | 0.0719  | 1.3148 | 0.21893 | 0.38  | -5.71 | -0.2548 | none       |
| MS4A4A   | 0.203  | 0.1398  | 1.3148 | 0.21895 | 0.38  | -5.71 | -1.0358 | none       |
| SLC19A1  | 0.13   | 0.0963  | 1.3148 | 0.21895 | 0.38  | -5.71 | 1.38314 | none       |
| PLXNB3   | -0.095 | -0.0929 | -1.314 | 0.21922 | 0.381 | -5.71 | 0.08636 | none       |
| MAT2B    | -0.141 | -0.1906 | -1.314 | 0.21937 | 0.381 | -5.72 | 0.82015 | none       |
| ZNF585A  | 0.201  | 0.0743  | 1.3134 | 0.2194  | 0.381 | -5.72 | -0.5857 | none       |
| KCTD8    | 0.129  | 0.0774  | 1.3134 | 0.21941 | 0.381 | -5.72 | -1.1473 | none       |
| ANKRD55  | 0.229  | 0.1201  | 1.3131 | 0.21949 | 0.381 | -5.72 | -0.5999 | none       |
| CCDC93   | 0.298  | 0.3392  | 1.3129 | 0.21955 | 0.381 | -5.72 | -0.422  | none       |
| TMEM106  | -0.144 | -0.1556 | -1.313 | 0.21963 | 0.381 | -5.72 | 1.31645 | none       |
| ACR      | 0.121  | 0.121   | 1.3125 | 0.21971 | 0.381 | -5.72 | 1.2947  | none       |
| ZNF17    | 0.253  | 0.1814  | 1.3122 | 0.21981 | 0.381 | -5.72 | -0.7042 | none       |
| DHX29    | 0.345  | 0.3839  | 1.312  | 0.21987 | 0.381 | -5.72 | -0.1883 | none       |
| C15ORF61 | 0.25   | 0.1765  | 1.3119 | 0.21988 | 0.381 | -5.72 | -0.2919 | none       |
| RPN1     | -0.129 | -0.134  | -1.312 | 0.21992 | 0.381 | -5.72 | 1.54426 | none       |
| CHMP4B   | 0.214  | 0.2886  | 1.3117 | 0.21994 | 0.381 | -5.72 | -0.7384 | none       |
| WWC3     | 0.239  | 0.2598  | 1.3117 | 0.21996 | 0.381 | -5.72 | -0.0763 | none       |
| ZNF268   | 0.288  | 0.2413  | 1.311  | 0.22017 | 0.382 | -5.72 | -0.6697 | none       |
| TUBB6    | 0.229  | 0.1755  | 1.3103 | 0.22039 | 0.382 | -5.72 | -0.4046 | none       |
| ARL5B    | 0.1    | 0.0216  | 1.3103 | 0.2204  | 0.382 | -5.72 | 0.76314 | none       |
| PKP3     | -0.258 | -0.1927 | -1.31  | 0.22047 | 0.382 | -5.72 | -0.3148 | none       |
| ACRBP    | 0.428  | 0.2963  | 1.31   | 0.22051 | 0.382 | -5.72 | -0.2065 | none       |
| CASP4    | -0.144 | -0.1372 | -1.31  | 0.22057 | 0.382 | -5.72 | 0.03796 | none       |
| KDM5D    | 0.262  | 0.2455  | 1.3096 | 0.22063 | 0.382 | -5.72 | 0.02957 | none       |
| WRB      | -0.194 | -0.2317 | -1.309 | 0.2207  | 0.382 | -5.72 | 0.75971 | none       |
| EBF1     | 0.151  | 0.1147  | 1.3086 | 0.22096 | 0.383 | -5.72 | -0.8127 | none       |
| ZBED6CL  | 0.14   | 0.2376  | 1.3085 | 0.22099 | 0.383 | -5.72 | 0.41737 | none       |
| MGAT5B   | 0.102  | 0.0603  | 1.3083 | 0.22107 | 0.383 | -5.72 | -0.8939 | none       |
| TRADD    | 0.125  | 0.0912  | 1.3081 | 0.22114 | 0.383 | -5.72 | 0.81239 | none       |
| MEOX1    | 0.133  | 0.0348  | 1.3074 | 0.22136 | 0.383 | -5.72 | 0.26653 | none       |
| QPCT     | -0.3   | -0.332  | -1.307 | 0.2216  | 0.384 | -5.72 | -0.1681 | none       |
| MORF4L2  | 0.145  | 0.0547  | 1.3065 | 0.22165 | 0.384 | -5.72 | 0.10599 | none       |

|           |        |         |        |         |       |       |         |      |
|-----------|--------|---------|--------|---------|-------|-------|---------|------|
| RAB11FIP2 | 0.278  | 0.2244  | 1.3063 | 0.22171 | 0.384 | -5.72 | 0.24801 | none |
| ZBBX      | 0.122  | 0.0755  | 1.3062 | 0.22175 | 0.384 | -5.72 | 0.29973 | none |
| CD2       | -0.124 | -0.0661 | -1.306 | 0.22177 | 0.384 | -5.72 | 0.96041 | none |
| TTC12     | 0.289  | 0.2677  | 1.3061 | 0.22177 | 0.384 | -5.72 | -0.9349 | none |
| POTEJ     | 0.107  | 0.071   | 1.3057 | 0.22189 | 0.384 | -5.72 | 0.07437 | none |
| ZXDA      | -0.098 | -0.0678 | -1.306 | 0.2219  | 0.384 | -5.72 | 0.79104 | none |
| TSPYL4    | -0.16  | -0.1119 | -1.306 | 0.22194 | 0.384 | -5.73 | 1.80174 | none |
| COX11     | 0.203  | 0.0938  | 1.3052 | 0.22208 | 0.384 | -5.73 | -0.368  | none |
| GTF2F2    | -0.131 | -0.0715 | -1.305 | 0.22209 | 0.384 | -5.73 | 1.10561 | none |
| ILF3      | 0.387  | 0.4912  | 1.3048 | 0.22219 | 0.384 | -5.73 | 0.21972 | none |
| PPP1R12C  | -0.291 | -0.1318 | -1.305 | 0.22221 | 0.384 | -5.73 | 0.5323  | none |
| LSM10     | -0.183 | -0.2009 | -1.305 | 0.22226 | 0.384 | -5.73 | 1.77018 | none |
| RLIM      | 0.245  | 0.2312  | 1.3046 | 0.22227 | 0.384 | -5.73 | -0.3417 | none |
| PPM1G     | 0.185  | 0.2023  | 1.304  | 0.22245 | 0.385 | -5.73 | 0.45209 | none |
| TMEM81    | -0.261 | -0.1965 | -1.304 | 0.2225  | 0.385 | -5.73 | 0.3529  | none |
| ITPKC     | 0.204  | 0.2756  | 1.3038 | 0.22254 | 0.385 | -5.73 | 0.18588 | none |
| AKNA      | 0.433  | 0.5603  | 1.3036 | 0.22258 | 0.385 | -5.73 | -0.1033 | none |
| METTL1    | 0.105  | 0.1078  | 1.3036 | 0.22261 | 0.385 | -5.73 | 0.22455 | none |
| PANK4     | 0.253  | 0.2668  | 1.3031 | 0.22277 | 0.385 | -5.73 | -0.4564 | none |
| CLDN19    | 0.123  | 0.0917  | 1.3027 | 0.22287 | 0.385 | -5.73 | -1.014  | none |
| IL15RA    | 0.145  | 0.1407  | 1.3025 | 0.22297 | 0.385 | -5.73 | 0.51156 | none |
| PSMD2     | 0.155  | 0.2068  | 1.3023 | 0.22302 | 0.385 | -5.73 | 0.55475 | none |
| DNAJC15   | -0.254 | -0.2758 | -1.302 | 0.22316 | 0.386 | -5.73 | 1.95209 | none |
| FAM71E2   | -0.09  | -0.0703 | -1.301 | 0.22329 | 0.386 | -5.73 | 0       | none |
| FUT3      | 0.194  | 0.2698  | 1.3014 | 0.22333 | 0.386 | -5.73 | 0.56081 | none |
| CPXM2     | -0.175 | -0.1634 | -1.301 | 0.22334 | 0.386 | -5.73 | 0.60301 | none |
| NID2      | 0.38   | 0.1985  | 1.3013 | 0.22335 | 0.386 | -5.73 | -0.0039 | none |
| RBM47     | 0.247  | 0.1622  | 1.301  | 0.22345 | 0.386 | -5.73 | -0.0776 | none |
| MYO1B     | 0.295  | 0.3372  | 1.3008 | 0.2235  | 0.386 | -5.73 | -0.6477 | none |
| JAM2      | 0.283  | 0.1901  | 1.3006 | 0.22358 | 0.386 | -5.73 | -0.8861 | none |
| ACTRT2    | 0.092  | 0.0758  | 1.3006 | 0.22359 | 0.386 | -5.73 | -0.5539 | none |
| ATP6AP2   | 0.133  | 0.029   | 1.3003 | 0.22367 | 0.386 | -5.73 | -0.4269 | none |
| CPB2      | 0.143  | 0.1038  | 1.3002 | 0.22372 | 0.386 | -5.73 | -0.4564 | none |
| DNAJB7    | 0.118  | 0.0961  | 1.2999 | 0.22382 | 0.386 | -5.73 | -0.4001 | none |
| OR10S1    | -0.105 | -0.0878 | -1.3   | 0.22388 | 0.386 | -5.73 | 1.8745  | none |
| PRR14     | 0.217  | 0.2408  | 1.2991 | 0.22406 | 0.387 | -5.73 | 0.85663 | none |
| CNTD2     | -0.109 | -0.1037 | -1.299 | 0.22413 | 0.387 | -5.73 | 1.24883 | none |
| PHOX2A    | 0.113  | 0.1127  | 1.2984 | 0.22431 | 0.387 | -5.73 | -0.7616 | none |
| RTN3      | -0.132 | -0.173  | -1.298 | 0.22437 | 0.387 | -5.73 | 1.76699 | none |
| LRRC20    | 0.145  | 0.1872  | 1.2979 | 0.22446 | 0.387 | -5.73 | 0.72578 | none |



|          |        |         |        |         |       |       |         |            |
|----------|--------|---------|--------|---------|-------|-------|---------|------------|
| PHF2     | 0.296  | 0.3895  | 1.2978 | 0.2245  | 0.387 | -5.73 | -0.3375 | none       |
| OR2A12   | 0.156  | 0.0959  | 1.2975 | 0.2246  | 0.387 | -5.73 | -0.6044 | none       |
| MRPL32   | -0.155 | -0.1678 | -1.297 | 0.22478 | 0.388 | -5.74 | 0.40101 | none       |
| SRSF5    | 0.112  | 0.0997  | 1.2967 | 0.22488 | 0.388 | -5.74 | 0.61478 | none       |
| DLX2     | 0.1    | 0.0754  | 1.2966 | 0.22489 | 0.388 | -5.74 | -0.1272 | none       |
| PDE1A    | 0.106  | 0.1044  | 1.2964 | 0.22495 | 0.388 | -5.74 | -0.5637 | none       |
| HUS1     | 0.16   | 0.0718  | 1.2964 | 0.22497 | 0.388 | -5.74 | 0.54409 | none       |
| LLGL2    | 0.227  | 0.2007  | 1.2962 | 0.22502 | 0.388 | -5.74 | -0.3666 | none       |
| NIPSNAP3 | -0.137 | -0.1249 | -1.296 | 0.22504 | 0.388 | -5.74 | 1.1013  | none       |
| TARBP1   | 0.232  | 0.2302  | 1.296  | 0.22509 | 0.388 | -5.74 | -1.1503 | none       |
| IL16     | -0.166 | -0.0801 | -1.296 | 0.22509 | 0.388 | -5.74 | 0.69524 | none       |
| ZRANB1   | 0.164  | 0.1481  | 1.2957 | 0.2252  | 0.388 | -5.74 | -0.4098 | none       |
| CCDC74B  | 0.297  | 0.2378  | 1.2956 | 0.22523 | 0.388 | -5.74 | -0.517  | none       |
| UNG      | -0.132 | -0.141  | -1.295 | 0.22538 | 0.388 | -5.74 | 2.18956 | AA-related |
| H2AFB2   | -0.188 | -0.1769 | -1.295 | 0.22539 | 0.388 | -5.74 | 0.03723 | none       |
| PABPC3   | 0.094  | 0.0546  | 1.2948 | 0.22548 | 0.388 | -5.74 | -1.009  | none       |
| INTS10   | 0.11   | 0.1116  | 1.2941 | 0.22572 | 0.389 | -5.74 | -0.0779 | none       |
| DNAJC19  | -0.216 | -0.2757 | -1.294 | 0.2258  | 0.389 | -5.74 | 1.31783 | none       |
| SOX5     | -0.129 | -0.1245 | -1.294 | 0.22582 | 0.389 | -5.74 | -0.6509 | none       |
| WNK3     | 0.108  | 0.0505  | 1.2935 | 0.22592 | 0.389 | -5.74 | -1.0884 | none       |
| CLEC2L   | 0.122  | 0.0921  | 1.2932 | 0.22602 | 0.389 | -5.74 | -0.2994 | none       |
| TLE4     | 0.261  | 0.2919  | 1.2923 | 0.22632 | 0.389 | -5.74 | -0.2966 | none       |
| PSMD6    | -0.096 | -0.0969 | -1.292 | 0.22633 | 0.389 | -5.74 | 0.71507 | none       |
| BOP1     | 0.129  | 0.1534  | 1.2923 | 0.22634 | 0.389 | -5.74 | #####   | none       |
| POLD3    | 0.311  | 0.4445  | 1.2915 | 0.2266  | 0.39  | -5.74 | 0.05243 | none       |
| SIVA1    | -0.271 | -0.2909 | -1.291 | 0.22672 | 0.39  | -5.74 | 1.55354 | none       |
| MYBPC3   | 0.088  | 0.0826  | 1.2911 | 0.22673 | 0.39  | -5.74 | -0.9267 | none       |
| ATP11C   | 0.222  | 0.2465  | 1.2907 | 0.22685 | 0.39  | -5.74 | 0.17106 | none       |
| HBG2     | 0.193  | 0.2398  | 1.2906 | 0.22688 | 0.39  | -5.74 | 0.79074 | none       |
| ADPRHL1  | 0.188  | 0.1403  | 1.2906 | 0.2269  | 0.39  | -5.74 | -0.1499 | none       |
| MOGS     | 0.216  | 0.1496  | 1.2903 | 0.227   | 0.39  | -5.74 | -0.7848 | none       |
| COL13A1  | -0.088 | -0.0641 | -1.29  | 0.22703 | 0.39  | -5.74 | -0.6211 | none       |
| ABCB8    | 0.148  | 0.1522  | 1.2898 | 0.22714 | 0.39  | -5.74 | 1.06189 | none       |
| MDC1     | 0.369  | 0.5214  | 1.2897 | 0.22718 | 0.39  | -5.74 | 0.04603 | none       |
| NDUFS6   | -0.197 | -0.1695 | -1.289 | 0.22726 | 0.391 | -5.74 | 0.16516 | none       |
| UBTF     | 0.394  | 0.5281  | 1.2894 | 0.22729 | 0.391 | -5.74 | 0.11595 | none       |
| OCLM     | 0.251  | 0.2298  | 1.2893 | 0.22733 | 0.391 | -5.74 | 0.16612 | none       |
| H3F3C    | 0.211  | 0.165   | 1.2893 | 0.22733 | 0.391 | -5.74 | -0.5702 | none       |
| TRPS1    | 0.264  | 0.3806  | 1.2892 | 0.22735 | 0.391 | -5.74 | 0.02625 | none       |
| FBP1     | -0.291 | -0.2451 | -1.289 | 0.22738 | 0.391 | -5.74 | 1.68197 | none       |

|          |        |         |        |         |       |       |         |      |
|----------|--------|---------|--------|---------|-------|-------|---------|------|
| DPH3     | -0.228 | -0.2563 | -1.289 | 0.22738 | 0.391 | -5.74 | 1.29421 | none |
| WDR86    | 0.102  | 0.1277  | 1.2889 | 0.22745 | 0.391 | -5.74 | 0.27224 | none |
| ITIH6    | -0.102 | -0.0683 | -1.289 | 0.2275  | 0.391 | -5.75 | 1.63349 | none |
| PDK2     | 0.155  | 0.156   | 1.2888 | 0.2275  | 0.391 | -5.75 | 0.3974  | none |
| LY6G5B   | 0.66   | 0.6103  | 1.2886 | 0.22756 | 0.391 | -5.75 | 0.08317 | none |
| CCNO     | -0.102 | -0.0994 | -1.288 | 0.2277  | 0.391 | -5.75 | 0.99885 | none |
| FBXL17   | 0.17   | 0.1021  | 1.2879 | 0.2278  | 0.391 | -5.75 | 0.96938 | none |
| PCDHGB5  | -0.087 | -0.0682 | -1.288 | 0.22784 | 0.391 | -5.75 | 1.11272 | none |
| LRRC28   | 0.142  | -0.0147 | 1.2876 | 0.22788 | 0.391 | -5.75 | -0.1352 | none |
| CMIP     | 0.255  | 0.3624  | 1.2869 | 0.22813 | 0.391 | -5.75 | 0.02418 | none |
| CASKIN1  | 0.133  | 0.1476  | 1.2864 | 0.22829 | 0.392 | -5.75 | 1.56865 | none |
| DOK1     | -0.128 | -0.0406 | -1.286 | 0.22836 | 0.392 | -5.75 | 1.57079 | none |
| FAM45A   | 0.175  | 0.0587  | 1.2862 | 0.22836 | 0.392 | -5.75 | -0.4824 | none |
| CD99L2   | 0.112  | 0.0834  | 1.2861 | 0.2284  | 0.392 | -5.75 | 0.56987 | none |
| AKR1C4   | 0.105  | 0.0733  | 1.2857 | 0.22853 | 0.392 | -5.75 | 0.74411 | none |
| PPFIA3   | -0.101 | -0.0541 | -1.286 | 0.22855 | 0.392 | -5.75 | 1.53961 | none |
| C16ORF91 | -0.19  | -0.1251 | -1.286 | 0.22857 | 0.392 | -5.75 | 0.97524 | none |
| TMEM37   | -0.152 | -0.1175 | -1.285 | 0.2286  | 0.392 | -5.75 | 0.92103 | none |
| ELP5     | -0.21  | -0.266  | -1.285 | 0.22867 | 0.392 | -5.75 | 1.01938 | none |
| ADRM1    | -0.129 | -0.0653 | -1.285 | 0.2287  | 0.392 | -5.75 | 0.66817 | none |
| DPYSL3   | -0.184 | -0.1428 | -1.285 | 0.22875 | 0.392 | -5.75 | -0.2685 | none |
| PRELID3B | -0.183 | -0.2058 | -1.285 | 0.22878 | 0.392 | -5.75 | 1.50013 | none |
| EMC8     | 0.185  | 0.0889  | 1.2846 | 0.2289  | 0.392 | -5.75 | 0.78858 | none |
| MED12L   | 0.244  | 0.2584  | 1.2845 | 0.22894 | 0.392 | -5.75 | -0.0094 | none |
| RNASEH2E | -0.117 | -0.1571 | -1.284 | 0.22902 | 0.392 | -5.75 | 1.07883 | none |
| S1PR1    | -0.132 | -0.1579 | -1.284 | 0.22908 | 0.392 | -5.75 | 0.03711 | none |
| IARS2    | 0.141  | 0.1801  | 1.284  | 0.2291  | 0.392 | -5.75 | 0.9071  | none |
| TFE3     | 0.219  | 0.2595  | 1.2836 | 0.22922 | 0.393 | -5.75 | 0.12411 | none |
| KIAA0753 | 0.339  | 0.3662  | 1.2836 | 0.22922 | 0.393 | -5.75 | 0.40733 | none |
| SH3BGRL  | -0.144 | -0.1724 | -1.284 | 0.22926 | 0.393 | -5.75 | 1.54205 | none |
| CDKN2D   | -0.159 | -0.0935 | -1.284 | 0.22926 | 0.393 | -5.75 | 1.32276 | none |
| BNIP3    | -0.139 | -0.1147 | -1.283 | 0.22946 | 0.393 | -5.75 | 1.31986 | none |
| SMAP2    | -0.09  | -0.0507 | -1.283 | 0.22956 | 0.393 | -5.75 | 0.74369 | none |
| SLC25A25 | 0.13   | 0.1556  | 1.2826 | 0.22958 | 0.393 | -5.75 | 1.30882 | none |
| RPF1     | 0.105  | 0.0502  | 1.2824 | 0.22965 | 0.393 | -5.75 | -0.2036 | none |
| DQX1     | -0.226 | -0.2093 | -1.282 | 0.22966 | 0.393 | -5.75 | 1.64358 | none |
| COQ8B    | 0.147  | 0.1239  | 1.2823 | 0.22966 | 0.393 | -5.75 | 1.0327  | none |
| USF1     | 0.398  | 0.4582  | 1.2818 | 0.22984 | 0.393 | -5.75 | -0.4607 | none |
| SOX30    | -0.104 | -0.0638 | -1.282 | 0.22991 | 0.393 | -5.75 | -0.1653 | none |
| GCNT1    | 0.2    | 0.1734  | 1.2815 | 0.22993 | 0.393 | -5.75 | 0.11264 | none |

|          |        |         |        |         |       |       |         |      |
|----------|--------|---------|--------|---------|-------|-------|---------|------|
| OXTR     | -0.147 | -0.1437 | -1.281 | 0.22998 | 0.393 | -5.75 | 0.74759 | none |
| ZDHHC23  | 0.12   | 0.1349  | 1.2813 | 0.23001 | 0.393 | -5.75 | -1.0003 | none |
| PEX2     | -0.23  | -0.2509 | -1.281 | 0.23011 | 0.394 | -5.75 | 1.4776  | none |
| SRSF11   | 0.22   | 0.2457  | 1.2809 | 0.23015 | 0.394 | -5.75 | 0.15121 | none |
| CD93     | 0.106  | 0.116   | 1.2808 | 0.23017 | 0.394 | -5.75 | -0.6613 | none |
| RPS9     | -0.281 | -0.2337 | -1.28  | 0.23058 | 0.394 | -5.76 | 0.26967 | none |
| MTHFS    | -0.144 | -0.1642 | -1.279 | 0.23061 | 0.394 | -5.76 | 1.22717 | none |
| POMGNT2  | -0.111 | -0.0416 | -1.279 | 0.23075 | 0.394 | -5.76 | 1.16635 | none |
| KANK1    | 0.258  | 0.1971  | 1.2789 | 0.23081 | 0.394 | -5.76 | -0.1526 | none |
| NGFR     | 0.109  | 0.0912  | 1.2786 | 0.23091 | 0.395 | -5.76 | 0.67844 | none |
| NCR3LG1  | 0.099  | 0.0961  | 1.2783 | 0.23101 | 0.395 | -5.76 | -0.0438 | none |
| TBC1D3D  | -0.167 | -0.0537 | -1.278 | 0.23109 | 0.395 | -5.76 | 0.85261 | none |
| HEY1     | -0.086 | -0.0471 | -1.278 | 0.23113 | 0.395 | -5.76 | 1.42796 | none |
| HSPD1    | -0.132 | -0.0528 | -1.278 | 0.23122 | 0.395 | -5.76 | 1.75892 | none |
| UBAC1    | 0.122  | 0.1296  | 1.2776 | 0.23125 | 0.395 | -5.76 | 0.45314 | none |
| APLF     | -0.113 | 0.0067  | -1.277 | 0.23132 | 0.395 | -5.76 | 1.56616 | none |
| DNM3     | -0.177 | -0.1298 | -1.277 | 0.23138 | 0.395 | -5.76 | 1.65123 | none |
| ZFP69    | 0.16   | 0.116   | 1.2772 | 0.23139 | 0.395 | -5.76 | -0.8495 | none |
| METTL26  | -0.166 | -0.1537 | -1.277 | 0.23162 | 0.395 | -5.76 | 1.43277 | none |
| ALKBH8   | 0.171  | 0.1554  | 1.2764 | 0.23166 | 0.395 | -5.76 | 1.02612 | none |
| TSPAN13  | -0.173 | -0.1668 | -1.276 | 0.23186 | 0.396 | -5.76 | 2.02059 | none |
| IFT27    | -0.196 | -0.2284 | -1.276 | 0.23196 | 0.396 | -5.76 | 0.63974 | none |
| MAD2L1   | -0.202 | -0.2304 | -1.275 | 0.23202 | 0.396 | -5.76 | 0.82457 | none |
| SQSTM1   | -0.125 | -0.1291 | -1.275 | 0.23218 | 0.396 | -5.76 | 1.5937  | none |
| TOM1L2   | 0.17   | 0.2328  | 1.2749 | 0.23218 | 0.396 | -5.76 | -0.045  | none |
| YME1L1   | -0.207 | -0.1388 | -1.275 | 0.23228 | 0.396 | -5.76 | 0.55919 | none |
| KRTAP3-1 | -0.134 | -0.1279 | -1.274 | 0.23232 | 0.396 | -5.76 | 1.11089 | none |
| NCKAP1   | 0.225  | 0.1595  | 1.2744 | 0.23233 | 0.396 | -5.76 | -0.5519 | none |
| PRRC2C   | 0.428  | 0.591   | 1.2743 | 0.23236 | 0.396 | -5.76 | 0.03982 | none |
| H2AFB3   | -0.1   | -0.0666 | -1.274 | 0.2325  | 0.397 | -5.76 | 1.24898 | none |
| MAF1     | 0.102  | 0.0952  | 1.2736 | 0.23263 | 0.397 | -5.76 | 0.97225 | none |
| C9ORF24  | 0.18   | 0.162   | 1.2733 | 0.23271 | 0.397 | -5.76 | 0.7926  | none |
| TC2N     | 0.169  | 0.0527  | 1.2733 | 0.23273 | 0.397 | -5.76 | 1.22308 | none |
| RPL21    | -0.148 | -0.1595 | -1.273 | 0.23277 | 0.397 | -5.76 | 0.83259 | none |
| BAZ1B    | 0.474  | 0.6436  | 1.2728 | 0.23287 | 0.397 | -5.76 | -0.0797 | none |
| MRAP     | -0.175 | -0.1048 | -1.273 | 0.23289 | 0.397 | -5.76 | 0.91002 | none |
| ZNF277   | 0.167  | 0.0587  | 1.2728 | 0.23289 | 0.397 | -5.76 | 0.39506 | none |
| TRIM25   | 0.186  | 0.2479  | 1.2725 | 0.23297 | 0.397 | -5.76 | -0.2725 | none |
| MTHFSD   | 0.191  | 0.166   | 1.2723 | 0.23307 | 0.397 | -5.76 | -0.1637 | none |
| VSIG2    | 0.148  | 0.0659  | 1.2722 | 0.23308 | 0.397 | -5.76 | -0.4505 | none |

|          |        |         |        |         |       |       |         |      |
|----------|--------|---------|--------|---------|-------|-------|---------|------|
| KRT74    | 0.111  | 0.1148  | 1.2718 | 0.23322 | 0.397 | -5.77 | -0.3854 | none |
| LRRC41   | 0.158  | 0.12    | 1.2712 | 0.23342 | 0.398 | -5.77 | -0.6777 | none |
| TP53BP1  | 0.574  | 0.6738  | 1.2707 | 0.23361 | 0.398 | -5.77 | -0.1815 | none |
| MTCH1    | -0.17  | -0.1221 | -1.271 | 0.23366 | 0.398 | -5.77 | 1.18887 | none |
| SIGLEC12 | 0.161  | 0.2108  | 1.2704 | 0.23368 | 0.398 | -5.77 | -0.4921 | none |
| RAB3A    | 0.324  | 0.1838  | 1.27   | 0.23385 | 0.398 | -5.77 | -0.28   | none |
| SEC23IP  | 0.236  | 0.2113  | 1.2698 | 0.2339  | 0.398 | -5.77 | 0.65899 | none |
| MRT04    | 0.198  | 0.2146  | 1.2698 | 0.2339  | 0.398 | -5.77 | -0.0492 | none |
| GGT7     | -0.231 | -0.173  | -1.27  | 0.23393 | 0.398 | -5.77 | 1.38746 | none |
| C19ORF81 | 0.185  | 0.0709  | 1.2693 | 0.23409 | 0.398 | -5.77 | -0.5077 | none |
| INO80E   | -0.19  | -0.1195 | -1.269 | 0.23411 | 0.398 | -5.77 | 1.86998 | none |
| GGT2     | -0.102 | -0.0653 | -1.269 | 0.2342  | 0.399 | -5.77 | 1.57462 | none |
| CCT8L2   | -0.082 | -0.0533 | -1.269 | 0.23428 | 0.399 | -5.77 | 1.01512 | none |
| FCN3     | 0.137  | 0.1372  | 1.2684 | 0.23439 | 0.399 | -5.77 | 0.8562  | none |
| ACHE     | -0.144 | -0.0819 | -1.268 | 0.23456 | 0.399 | -5.77 | 1.29094 | none |
| VAX1     | 0.083  | 0.0868  | 1.2678 | 0.2346  | 0.399 | -5.77 | -0.5032 | none |
| CD96     | 0.186  | 0.026   | 1.2676 | 0.23467 | 0.399 | -5.77 | -0.6883 | none |
| LRP5     | -0.395 | -0.1284 | -1.267 | 0.23481 | 0.399 | -5.77 | 0.62209 | none |
| PIK3AP1  | -0.212 | -0.1255 | -1.267 | 0.23481 | 0.399 | -5.77 | 1.12504 | none |
| OSGEP    | 0.147  | 0.0287  | 1.2668 | 0.23493 | 0.399 | -5.77 | -0.6634 | none |
| HAPLN2   | 0.1    | 0.1005  | 1.2667 | 0.23497 | 0.399 | -5.77 | 1.23506 | none |
| RGS13    | 0.087  | 0.0692  | 1.2666 | 0.23498 | 0.399 | -5.77 | -0.2094 | none |
| NCBP1    | 0.179  | 0.1236  | 1.2666 | 0.235   | 0.399 | -5.77 | -0.436  | none |
| SCAMP1   | 0.159  | 0.0333  | 1.2665 | 0.23502 | 0.399 | -5.77 | -0.232  | none |
| ZNF302   | 0.134  | 0.0286  | 1.2661 | 0.23516 | 0.4   | -5.77 | 0.95662 | none |
| ANO6     | 0.242  | 0.2136  | 1.2661 | 0.23516 | 0.4   | -5.77 | -0.9002 | none |
| SNX25    | 0.235  | 0.2744  | 1.2658 | 0.23527 | 0.4   | -5.77 | 0.02697 | none |
| IRF7     | -0.537 | -0.3862 | -1.266 | 0.23533 | 0.4   | -5.77 | 2.01348 | none |
| MCHR2    | -0.091 | -0.069  | -1.266 | 0.23535 | 0.4   | -5.77 | 1.31599 | none |
| SMOC2    | 0.134  | 0.1225  | 1.2654 | 0.23542 | 0.4   | -5.77 | 0.47927 | none |
| KLHL42   | 0.17   | 0.1998  | 1.2652 | 0.23548 | 0.4   | -5.77 | 0.57049 | none |
| DNAJB12  | 0.201  | 0.2577  | 1.265  | 0.23554 | 0.4   | -5.77 | -0.2872 | none |
| TMEM214  | -0.169 | 0.021   | -1.265 | 0.23554 | 0.4   | -5.77 | 0.43598 | none |
| PTPRM    | 0.251  | 0.2425  | 1.265  | 0.23556 | 0.4   | -5.77 | 0.48634 | none |
| TMEM115  | 0.131  | 0.1016  | 1.2649 | 0.23558 | 0.4   | -5.77 | 1.09847 | none |
| WBP11    | 0.237  | 0.2546  | 1.2647 | 0.23566 | 0.4   | -5.77 | -0.3907 | none |
| LTA      | -0.236 | -0.2283 | -1.265 | 0.2357  | 0.4   | -5.77 | 1.46341 | none |
| SYN2     | -0.137 | -0.1102 | -1.264 | 0.2358  | 0.4   | -5.77 | 1.61144 | none |
| SCO2     | -0.245 | -0.2284 | -1.264 | 0.23585 | 0.4   | -5.77 | 1.72266 | none |
| TRIB1    | 0.133  | 0.1346  | 1.2641 | 0.23586 | 0.4   | -5.77 | 0.43914 | none |

|          |        |         |        |         |       |       |         |            |
|----------|--------|---------|--------|---------|-------|-------|---------|------------|
| CLDN25   | 0.097  | 0.0966  | 1.264  | 0.23589 | 0.4   | -5.77 | 1.06121 | none       |
| INAFM1   | 0.166  | 0.1649  | 1.2639 | 0.23593 | 0.4   | -5.77 | 1.34849 | none       |
| CCDC12   | 0.124  | 0.1096  | 1.2633 | 0.23614 | 0.401 | -5.78 | -0.51   | none       |
| MRPL39   | -0.142 | -0.2038 | -1.263 | 0.23625 | 0.401 | -5.78 | 1.79476 | none       |
| CRAT     | 0.333  | 0.277   | 1.2627 | 0.23633 | 0.401 | -5.78 | 0.09166 | none       |
| DESI2    | -0.239 | -0.2345 | -1.262 | 0.23643 | 0.401 | -5.78 | 1.21677 | none       |
| GABARAPI | -0.206 | -0.2818 | -1.262 | 0.23655 | 0.401 | -5.78 | 1.0019  | none       |
| COPG1    | 0.274  | 0.3513  | 1.2619 | 0.23662 | 0.401 | -5.78 | -0.0195 | none       |
| PDIA2    | 0.098  | 0.0982  | 1.2613 | 0.23682 | 0.402 | -5.78 | 0.6961  | none       |
| RIT1     | -0.161 | -0.2015 | -1.261 | 0.23687 | 0.402 | -5.78 | 1.84404 | none       |
| IFNK     | 0.105  | 0.1055  | 1.2611 | 0.23688 | 0.402 | -5.78 | 0.5892  | none       |
| ANO2     | -0.159 | -0.1585 | -1.261 | 0.2369  | 0.402 | -5.78 | 1.78783 | none       |
| MARK2    | 0.514  | 0.5903  | 1.2608 | 0.23699 | 0.402 | -5.78 | 0.49004 | none       |
| CMA1     | 0.141  | 0.1609  | 1.2608 | 0.237   | 0.402 | -5.78 | 1.86153 | none       |
| ZDHHC8   | 0.173  | 0.2289  | 1.2607 | 0.23703 | 0.402 | -5.78 | -0.4859 | none       |
| PITPNM3  | -0.092 | -0.0581 | -1.261 | 0.23709 | 0.402 | -5.78 | 1.65401 | none       |
| DDC      | -0.153 | -0.1551 | -1.26  | 0.23712 | 0.402 | -5.78 | 0.81648 | none       |
| ERICH1   | 0.21   | 0.2709  | 1.2603 | 0.23715 | 0.402 | -5.78 | -0.5339 | none       |
| CORO1B   | -0.183 | -0.1598 | -1.259 | 0.23768 | 0.403 | -5.78 | 1.08185 | none       |
| EID2     | 0.133  | 0.0695  | 1.2587 | 0.23772 | 0.403 | -5.78 | -0.7414 | none       |
| NFIA     | -0.183 | -0.1679 | -1.259 | 0.23773 | 0.403 | -5.78 | 1.16719 | none       |
| DENND5A  | 0.171  | 0.1846  | 1.2584 | 0.23782 | 0.403 | -5.78 | 0.58197 | none       |
| RRAGB    | 0.284  | 0.1979  | 1.2582 | 0.23789 | 0.403 | -5.78 | -0.1557 | none       |
| HES3     | -0.095 | -0.0653 | -1.258 | 0.23803 | 0.403 | -5.78 | 2.16608 | AA-related |
| GLI1     | -0.208 | -0.1715 | -1.258 | 0.23804 | 0.403 | -5.78 | 1.65401 | none       |
| ACLY     | 0.245  | 0.3142  | 1.2577 | 0.23806 | 0.403 | -5.78 | 0.17235 | none       |
| GNG10    | -0.219 | -0.2757 | -1.258 | 0.23808 | 0.403 | -5.78 | 0.58754 | none       |
| SSTR4    | -0.094 | -0.0939 | -1.258 | 0.23812 | 0.403 | -5.78 | 0.79024 | none       |
| GPR15    | -0.19  | -0.2735 | -1.258 | 0.23813 | 0.403 | -5.78 | 0.25162 | none       |
| PER3     | -0.189 | -0.1086 | -1.257 | 0.23814 | 0.403 | -5.78 | 0.71464 | none       |
| IFNW1    | 0.161  | 0.1022  | 1.2574 | 0.23818 | 0.403 | -5.78 | -1.0198 | none       |
| ACOT7    | -0.138 | -0.0818 | -1.257 | 0.23825 | 0.403 | -5.78 | 1.91109 | none       |
| ZNF219   | 0.33   | 0.2742  | 1.2569 | 0.23833 | 0.403 | -5.78 | 0.63673 | none       |
| TCTE1    | 0.109  | 0.09    | 1.2566 | 0.23843 | 0.403 | -5.78 | -0.2133 | none       |
| DUSP26   | 0.122  | 0.1234  | 1.2564 | 0.23851 | 0.403 | -5.78 | -0.3012 | none       |
| S100A3   | 0.137  | 0.1315  | 1.2563 | 0.23856 | 0.403 | -5.78 | 0.83308 | none       |
| DPCD     | 0.193  | 0.157   | 1.2561 | 0.23863 | 0.403 | -5.78 | -0.8262 | none       |
| PRDX5    | -0.178 | -0.1914 | -1.256 | 0.23864 | 0.403 | -5.78 | -0.1253 | none       |
| CHMP1A   | -0.14  | -0.1201 | -1.256 | 0.23872 | 0.404 | -5.78 | 1.59614 | none       |
| METAP1   | -0.207 | -0.1999 | -1.255 | 0.23883 | 0.404 | -5.78 | 1.87847 | none       |

|          |        |         |        |         |       |       |         |            |
|----------|--------|---------|--------|---------|-------|-------|---------|------------|
| C11ORF91 | -0.205 | -0.2155 | -1.255 | 0.23885 | 0.404 | -5.78 | 0.70019 | none       |
| ANGPTL8  | -0.108 | -0.1186 | -1.255 | 0.23886 | 0.404 | -5.78 | 1.72802 | none       |
| SLC1A7   | 0.091  | 0.0927  | 1.2554 | 0.23887 | 0.404 | -5.78 | 0.40323 | none       |
| ZBTB1    | 0.169  | 0.162   | 1.2554 | 0.23888 | 0.404 | -5.78 | 0.65562 | none       |
| SLC25A6  | -0.155 | -0.1652 | -1.255 | 0.23889 | 0.404 | -5.78 | 1.58917 | none       |
| TRAPPC2L | -0.18  | -0.2307 | -1.255 | 0.23893 | 0.404 | -5.78 | 0.54233 | none       |
| UNC5A    | -0.086 | -0.0572 | -1.255 | 0.23895 | 0.404 | -5.78 | 0.5047  | none       |
| PROM1    | -0.118 | -0.0935 | -1.255 | 0.23902 | 0.404 | -5.78 | 1.31906 | none       |
| TRIM29   | 0.168  | 0.1495  | 1.2548 | 0.23908 | 0.404 | -5.79 | -0.8094 | none       |
| COX7A1   | -0.184 | -0.2019 | -1.254 | 0.23929 | 0.404 | -5.79 | 0.81395 | none       |
| GIMAP1   | 0.21   | 0.1412  | 1.2539 | 0.23937 | 0.404 | -5.79 | -0.1481 | none       |
| HIBADH   | -0.146 | -0.1104 | -1.254 | 0.23946 | 0.404 | -5.79 | 1.66934 | none       |
| PNMT     | 0.098  | 0.106   | 1.2536 | 0.23948 | 0.404 | -5.79 | -0.0135 | none       |
| TMEM205  | -0.229 | -0.2688 | -1.253 | 0.23956 | 0.404 | -5.79 | 0.74208 | none       |
| RHBDD2   | -0.152 | -0.154  | -1.253 | 0.23962 | 0.404 | -5.79 | 1.352   | none       |
| GFRA2    | 0.114  | 0.1233  | 1.2526 | 0.23983 | 0.405 | -5.79 | -0.8507 | none       |
| CHST3    | 0.172  | 0.2692  | 1.2526 | 0.23984 | 0.405 | -5.79 | 0.25872 | none       |
| PRSS22   | 0.142  | 0.1557  | 1.2525 | 0.23987 | 0.405 | -5.79 | 1.33988 | none       |
| UMPS     | -0.126 | -0.1193 | -1.252 | 0.23993 | 0.405 | -5.79 | 0.40411 | none       |
| UBE2Q2L  | -0.318 | -0.2774 | -1.252 | 0.23998 | 0.405 | -5.79 | 0.00709 | none       |
| AFDN     | 0.342  | 0.4371  | 1.2521 | 0.24001 | 0.405 | -5.79 | -0.1523 | none       |
| GPR132   | 0.323  | 0.4249  | 1.2514 | 0.24025 | 0.405 | -5.79 | 0.23099 | none       |
| TELO2    | 0.144  | 0.2074  | 1.2512 | 0.24033 | 0.405 | -5.79 | 0.60842 | none       |
| FOXA3    | -0.138 | -0.1449 | -1.251 | 0.24039 | 0.405 | -5.79 | 0.07943 | none       |
| ZNFX1    | 0.366  | 0.4376  | 1.2494 | 0.24097 | 0.406 | -5.79 | -0.0132 | none       |
| SNCA     | -0.181 | -0.1114 | -1.249 | 0.24097 | 0.406 | -5.79 | 0.53066 | none       |
| PCDH7    | 0.16   | 0.1559  | 1.2492 | 0.24103 | 0.406 | -5.79 | -0.61   | none       |
| AGAP1    | 0.205  | 0.2207  | 1.2491 | 0.24107 | 0.406 | -5.79 | 0.49139 | none       |
| MRPL40   | 0.136  | 0.0524  | 1.2487 | 0.24122 | 0.407 | -5.79 | -0.7913 | none       |
| WRNIP1   | -0.143 | -0.0589 | -1.249 | 0.24124 | 0.407 | -5.79 | 1.26394 | none       |
| BEX5     | -1.1   | -1.0204 | -1.248 | 0.2413  | 0.407 | -5.79 | 2.15724 | AA-related |
| ZIC1     | 0.152  | 0.1694  | 1.2483 | 0.24135 | 0.407 | -5.79 | 0.33514 | none       |
| JAM3     | -0.105 | -0.0182 | -1.248 | 0.24136 | 0.407 | -5.79 | 1.18421 | none       |
| MLX      | 0.147  | 0.0492  | 1.2483 | 0.24136 | 0.407 | -5.79 | -0.5419 | none       |
| NDUFA6   | -0.262 | -0.254  | -1.248 | 0.24143 | 0.407 | -5.79 | 0.52389 | none       |
| DSP      | -0.094 | -0.0724 | -1.248 | 0.24146 | 0.407 | -5.79 | 0.04228 | none       |
| POFUT1   | 0.108  | 0.0807  | 1.2479 | 0.24148 | 0.407 | -5.79 | -0.4893 | none       |
| NLRP6    | 0.117  | 0.1128  | 1.2479 | 0.24148 | 0.407 | -5.79 | -0.66   | none       |
| CYHR1    | 0.106  | 0.1361  | 1.2477 | 0.24154 | 0.407 | -5.79 | 0.39083 | none       |
| ADH1A    | 0.151  | 0.151   | 1.2474 | 0.24166 | 0.407 | -5.79 | 1.40909 | none       |

|          |        |         |        |         |       |       |         |      |
|----------|--------|---------|--------|---------|-------|-------|---------|------|
| TBP      | 0.132  | 0.0755  | 1.2468 | 0.24187 | 0.407 | -5.79 | -0.4535 | none |
| AMMECR1  | 0.103  | 0.1173  | 1.2467 | 0.2419  | 0.407 | -5.79 | 0.36028 | none |
| EIF4H    | -0.099 | -0.0709 | -1.247 | 0.24193 | 0.407 | -5.79 | 1.05207 | none |
| SLC6A16  | 0.525  | 0.4533  | 1.2463 | 0.24203 | 0.407 | -5.79 | 0.67315 | none |
| OGG1     | 0.126  | 0.0863  | 1.2463 | 0.24205 | 0.407 | -5.79 | 1.0092  | none |
| TTLL4    | 0.228  | 0.2299  | 1.2463 | 0.24205 | 0.407 | -5.79 | -0.7289 | none |
| RAB36    | 0.115  | 0.1201  | 1.2459 | 0.24219 | 0.407 | -5.8  | -0.1364 | none |
| COPS8    | -0.135 | -0.1569 | -1.246 | 0.24221 | 0.407 | -5.8  | 1.78698 | none |
| SLIRP    | -0.212 | -0.2889 | -1.245 | 0.24243 | 0.408 | -5.8  | 0.82437 | none |
| ATMIN    | 0.148  | 0.1966  | 1.2451 | 0.24248 | 0.408 | -5.8  | -0.3391 | none |
| ARMS2    | 0.111  | 0.1107  | 1.245  | 0.24251 | 0.408 | -5.8  | 1.82213 | none |
| STAR3NL  | 0.185  | 0.0607  | 1.2447 | 0.24261 | 0.408 | -5.8  | 0.16512 | none |
| ATP6V1B1 | 0.198  | 0.1984  | 1.2446 | 0.24264 | 0.408 | -5.8  | 1.02907 | none |
| FOXO4L4  | -0.078 | -0.0508 | -1.244 | 0.24283 | 0.408 | -5.8  | -0.0151 | none |
| CARNMT1  | 0.215  | 0.1973  | 1.2439 | 0.24289 | 0.408 | -5.8  | 0.44356 | none |
| CCDC97   | 0.161  | 0.1485  | 1.2431 | 0.24316 | 0.409 | -5.8  | -0.9961 | none |
| MOGAT2   | 0.121  | 0.0812  | 1.2426 | 0.24335 | 0.409 | -5.8  | -1.3106 | none |
| LIG1     | 0.306  | 0.4272  | 1.2426 | 0.24336 | 0.409 | -5.8  | 0.32818 | none |
| PHLDB2   | 0.174  | 0.087   | 1.2426 | 0.24336 | 0.409 | -5.8  | 0.13694 | none |
| ZBTB26   | 0.253  | 0.1824  | 1.2425 | 0.24337 | 0.409 | -5.8  | 0.00596 | none |
| STRAP    | -0.141 | -0.1785 | -1.242 | 0.24344 | 0.409 | -5.8  | 0.43689 | none |
| PPIF     | -0.123 | -0.0815 | -1.242 | 0.24345 | 0.409 | -5.8  | 1.28995 | none |
| B3GNT3   | 0.108  | 0.097   | 1.2423 | 0.24347 | 0.409 | -5.8  | -0.1679 | none |
| CHRNA10  | 0.14   | 0.1291  | 1.2421 | 0.24351 | 0.409 | -5.8  | -0.1142 | none |
| FNDC9    | 0.23   | 0.2299  | 1.242  | 0.24356 | 0.409 | -5.8  | -0.8402 | none |
| RSRC2    | 0.401  | 0.4463  | 1.2418 | 0.24364 | 0.409 | -5.8  | -0.2015 | none |
| SLC39A1  | -0.129 | -0.0806 | -1.242 | 0.24369 | 0.409 | -5.8  | 1.52075 | none |
| ZP2      | 0.143  | 0.0839  | 1.2415 | 0.24373 | 0.409 | -5.8  | -0.6305 | none |
| HNRNPR   | 0.153  | 0.1629  | 1.2412 | 0.24384 | 0.409 | -5.8  | 0.32767 | none |
| CCDC86   | 0.275  | 0.3538  | 1.241  | 0.24391 | 0.409 | -5.8  | 0.24979 | none |
| FGD6     | 0.281  | 0.1929  | 1.241  | 0.24392 | 0.409 | -5.8  | -0.0108 | none |
| TYSND1   | 0.116  | 0.1008  | 1.2408 | 0.24399 | 0.409 | -5.8  | 0.94138 | none |
| CEP170B  | 0.225  | 0.2867  | 1.2407 | 0.24401 | 0.409 | -5.8  | -0.9598 | none |
| EVI2A    | -0.156 | -0.2317 | -1.241 | 0.24405 | 0.409 | -5.8  | 0.95806 | none |
| CASP14   | 0.331  | 0.2342  | 1.2404 | 0.24411 | 0.41  | -5.8  | -0.8144 | none |
| DLGAP3   | -0.092 | -0.0431 | -1.24  | 0.2443  | 0.41  | -5.8  | -0.3886 | none |
| PSMC6    | 0.101  | 0.0021  | 1.2398 | 0.24434 | 0.41  | -5.8  | 0.70086 | none |
| ACRV1    | -0.193 | -0.1115 | -1.24  | 0.24439 | 0.41  | -5.8  | 0.48149 | none |
| CBR3     | -0.169 | -0.1868 | -1.239 | 0.24451 | 0.41  | -5.8  | 1.24585 | none |
| SNX13    | 0.226  | 0.2411  | 1.2392 | 0.24455 | 0.41  | -5.8  | -0.0921 | none |

|           |        |         |        |         |       |       |         |      |
|-----------|--------|---------|--------|---------|-------|-------|---------|------|
| RHOBTB2   | 0.168  | 0.2521  | 1.2391 | 0.24458 | 0.41  | -5.8  | 0.45464 | none |
| MRPL55    | 0.181  | 0.1353  | 1.2391 | 0.24459 | 0.41  | -5.8  | -0.0123 | none |
| ATR       | 0.271  | 0.2787  | 1.2389 | 0.24466 | 0.41  | -5.8  | 0.61315 | none |
| CYP3A7-C1 | 0.098  | 0.0858  | 1.2379 | 0.245   | 0.411 | -5.8  | -0.6407 | none |
| ZNF775    | 0.132  | 0.1225  | 1.2377 | 0.24507 | 0.411 | -5.8  | -0.5181 | none |
| BAD       | -0.227 | -0.2241 | -1.237 | 0.24529 | 0.411 | -5.81 | 1.64628 | none |
| EWSR1     | 0.226  | 0.3007  | 1.2369 | 0.24536 | 0.411 | -5.81 | -0.4506 | none |
| USP36     | 0.267  | 0.365   | 1.2362 | 0.2456  | 0.411 | -5.81 | -0.3877 | none |
| MAFG      | 0.215  | 0.1792  | 1.2362 | 0.24562 | 0.411 | -5.81 | -0.548  | none |
| TBRG1     | 0.145  | 0.13    | 1.2359 | 0.24572 | 0.412 | -5.81 | 0.0318  | none |
| RPS27     | -0.26  | -0.3529 | -1.236 | 0.24574 | 0.412 | -5.81 | 1.2086  | none |
| UTP14A    | 0.437  | 0.5372  | 1.2355 | 0.24586 | 0.412 | -5.81 | 0.18796 | none |
| SCAPER    | 0.318  | 0.4063  | 1.2351 | 0.24599 | 0.412 | -5.81 | 0.12166 | none |
| TAC3      | 0.119  | 0.1368  | 1.2349 | 0.24606 | 0.412 | -5.81 | 0.91188 | none |
| ZBTB10    | 0.126  | 0.1208  | 1.2347 | 0.24616 | 0.412 | -5.81 | -0.9829 | none |
| OVCH1     | -0.132 | -0.1319 | -1.234 | 0.24631 | 0.412 | -5.81 | 1.37371 | none |
| CWC22     | 0.375  | 0.4414  | 1.234  | 0.24639 | 0.412 | -5.81 | 0.31714 | none |
| DMRT3     | 0.123  | 0.1296  | 1.2332 | 0.24668 | 0.413 | -5.81 | 1.42669 | none |
| ACAT1     | 0.141  | 0.1148  | 1.233  | 0.24675 | 0.413 | -5.81 | -0.1341 | none |
| TBC1D3    | 0.21   | 0.2226  | 1.2329 | 0.24677 | 0.413 | -5.81 | 0.09037 | none |
| ANKH      | 0.152  | 0.1546  | 1.2329 | 0.24679 | 0.413 | -5.81 | 0.73768 | none |
| RBPMS     | -0.133 | -0.0923 | -1.233 | 0.24689 | 0.413 | -5.81 | -0.6725 | none |
| TMEM132   | 0.089  | 0.0892  | 1.2325 | 0.24694 | 0.413 | -5.81 | -0.9319 | none |
| LGALS9C   | 0.155  | 0.1653  | 1.232  | 0.24711 | 0.413 | -5.81 | 0.60229 | none |
| MLLT3     | 0.323  | 0.3117  | 1.2312 | 0.24738 | 0.414 | -5.81 | 0.21284 | none |
| SLAMF7    | 0.154  | 0.1422  | 1.231  | 0.24746 | 0.414 | -5.81 | 0.84628 | none |
| CD3E      | -0.095 | -0.0689 | -1.23  | 0.24765 | 0.414 | -5.81 | 0.61668 | none |
| CCT3      | -0.111 | -0.0557 | -1.23  | 0.24767 | 0.414 | -5.81 | 1.47565 | none |
| HPCA      | -0.238 | -0.1788 | -1.23  | 0.24773 | 0.414 | -5.81 | 0.75152 | none |
| EML4      | 0.287  | 0.3361  | 1.2298 | 0.2479  | 0.414 | -5.81 | 0.97623 | none |
| RILP      | -0.219 | -0.1239 | -1.23  | 0.24794 | 0.414 | -5.81 | 1.76248 | none |
| GTF2B     | -0.18  | -0.2354 | -1.229 | 0.24802 | 0.415 | -5.81 | 1.69086 | none |
| 7-Mar     | 0.124  | 0.0527  | 1.229  | 0.24819 | 0.415 | -5.81 | -0.0067 | none |
| RSPO2     | -0.103 | -0.0644 | -1.229 | 0.24828 | 0.415 | -5.82 | 0.4238  | none |
| SERTAD3   | -0.106 | -0.1635 | -1.229 | 0.24828 | 0.415 | -5.82 | 0.53549 | none |
| KNCN      | 0.112  | 0.1159  | 1.2287 | 0.2483  | 0.415 | -5.82 | 0.57257 | none |
| KRT4      | 0.193  | 0.1935  | 1.2285 | 0.24835 | 0.415 | -5.82 | 1.21354 | none |
| HENMT1    | 0.121  | 0.0135  | 1.2285 | 0.24837 | 0.415 | -5.82 | 0.60693 | none |
| POTEH     | 0.189  | 0.1049  | 1.2284 | 0.2484  | 0.415 | -5.82 | -0.6518 | none |
| XRCC4     | -0.257 | -0.2467 | -1.228 | 0.24844 | 0.415 | -5.82 | 0.72226 | none |



|          |        |         |        |         |       |       |         |      |
|----------|--------|---------|--------|---------|-------|-------|---------|------|
| ATG3     | -0.099 | -0.0947 | -1.228 | 0.24845 | 0.415 | -5.82 | 1.89567 | none |
| TGFA     | -0.145 | -0.1264 | -1.228 | 0.24851 | 0.415 | -5.82 | 0.1144  | none |
| SYPL1    | -0.186 | -0.2629 | -1.228 | 0.24856 | 0.415 | -5.82 | 1.43767 | none |
| SH3PXD2A | 0.218  | 0.2671  | 1.2278 | 0.24861 | 0.415 | -5.82 | -0.122  | none |
| BAG6     | 0.332  | 0.4036  | 1.2274 | 0.24875 | 0.415 | -5.82 | 0.10107 | none |
| C5ORF51  | 0.16   | 0.0123  | 1.2272 | 0.24881 | 0.415 | -5.82 | -0.1715 | none |
| PEX10    | 0.178  | 0.0789  | 1.2269 | 0.24895 | 0.415 | -5.82 | -0.1748 | none |
| SLC25A18 | 0.103  | 0.1056  | 1.2269 | 0.24895 | 0.415 | -5.82 | -0.6156 | none |
| DHRS2    | -0.162 | -0.0502 | -1.227 | 0.24901 | 0.415 | -5.82 | 0.78893 | none |
| CALR     | -0.145 | -0.087  | -1.226 | 0.24909 | 0.416 | -5.82 | 1.08997 | none |
| TESPA1   | 0.29   | 0.3266  | 1.2264 | 0.24913 | 0.416 | -5.82 | -0.2375 | none |
| STX4     | 0.201  | 0.2226  | 1.2263 | 0.24914 | 0.416 | -5.82 | -1.1619 | none |
| RPRD2    | 0.333  | 0.3914  | 1.2262 | 0.24918 | 0.416 | -5.82 | 0.53668 | none |
| TMEM190  | -0.125 | -0.1437 | -1.226 | 0.24919 | 0.416 | -5.82 | -0.0744 | none |
| C11ORF86 | -0.118 | -0.0745 | -1.226 | 0.24922 | 0.416 | -5.82 | 0.41824 | none |
| ANKFN1   | -0.178 | -0.0703 | -1.226 | 0.24924 | 0.416 | -5.82 | 0.60525 | none |
| TOP1MT   | 0.188  | 0.2856  | 1.2258 | 0.24934 | 0.416 | -5.82 | -0.389  | none |
| ADCY3    | -0.165 | 0.0283  | -1.226 | 0.24935 | 0.416 | -5.82 | 0.27263 | none |
| C18ORF25 | 0.135  | 0.0617  | 1.2256 | 0.2494  | 0.416 | -5.82 | 0.3041  | none |
| DRAP1    | 0.211  | 0.1898  | 1.2255 | 0.24945 | 0.416 | -5.82 | 0.49734 | none |
| BTG3     | -0.107 | -0.1102 | -1.225 | 0.24946 | 0.416 | -5.82 | 0.99812 | none |
| B4GALNT1 | 0.101  | 0.031   | 1.2252 | 0.24956 | 0.416 | -5.82 | 0.96956 | none |
| TMC4     | 0.095  | 0.0946  | 1.225  | 0.24962 | 0.416 | -5.82 | -0.5691 | none |
| NEPRO    | -0.11  | -0.0938 | -1.224 | 0.24983 | 0.416 | -5.82 | 1.08583 | none |
| DNAH10   | 0.101  | 0.0958  | 1.2241 | 0.24994 | 0.416 | -5.82 | 0.08783 | none |
| PGPEP1   | 0.133  | #####   | 1.224  | 0.24997 | 0.416 | -5.82 | -0.4894 | none |
| KIF3B    | 0.33   | 0.4113  | 1.2238 | 0.25005 | 0.416 | -5.82 | -0.4557 | none |
| BLVRB    | -0.188 | -0.18   | -1.224 | 0.25008 | 0.416 | -5.82 | 1.48334 | none |
| ZNRF2    | 0.197  | 0.1537  | 1.2237 | 0.25009 | 0.416 | -5.82 | 0.93778 | none |
| S100A9   | -0.133 | -0.1102 | -1.224 | 0.25013 | 0.417 | -5.82 | -0.3165 | none |
| DCAF1    | 0.156  | 0.1796  | 1.2233 | 0.25023 | 0.417 | -5.82 | -0.3322 | none |
| ZFP36L2  | 0.14   | 0.1304  | 1.2231 | 0.25031 | 0.417 | -5.82 | -0.3473 | none |
| UBE2D3   | -0.164 | -0.2034 | -1.223 | 0.25034 | 0.417 | -5.82 | 1.36651 | none |
| PANK2    | 0.208  | 0.1611  | 1.2228 | 0.2504  | 0.417 | -5.82 | 1.13316 | none |
| RPL10L   | 0.257  | 0.1312  | 1.2227 | 0.25044 | 0.417 | -5.82 | -0.6996 | none |
| POC1B    | 0.131  | 0.103   | 1.2224 | 0.25055 | 0.417 | -5.82 | 1.368   | none |
| NPR2     | 0.328  | 0.2764  | 1.2222 | 0.25061 | 0.417 | -5.82 | -0.459  | none |
| GRAP     | 0.227  | 0.1905  | 1.2221 | 0.25065 | 0.417 | -5.82 | 0.54412 | none |
| MSANTD4  | 0.201  | 0.1369  | 1.2221 | 0.25066 | 0.417 | -5.82 | -0.0259 | none |
| MMP7     | 0.151  | 0.0862  | 1.2221 | 0.25066 | 0.417 | -5.82 | 0.65484 | none |

|          |        |         |        |         |       |       |         |      |
|----------|--------|---------|--------|---------|-------|-------|---------|------|
| HIST1H3H | 0.211  | 0.1008  | 1.2212 | 0.25098 | 0.417 | -5.82 | -0.5777 | none |
| MPHOSPH  | 0.425  | 0.482   | 1.2212 | 0.25099 | 0.417 | -5.82 | 0.15908 | none |
| PLEKHG6  | 0.237  | 0.1953  | 1.2212 | 0.25099 | 0.417 | -5.82 | -0.3167 | none |
| DEFB103A | 0.095  | 0.0788  | 1.2209 | 0.25108 | 0.417 | -5.82 | 0.85479 | none |
| DEFB103B | 0.095  | 0.0788  | 1.2209 | 0.25108 | 0.417 | -5.82 | 0.85479 | none |
| RAB3GAP1 | 0.212  | 0.1895  | 1.2209 | 0.2511  | 0.417 | -5.82 | -0.2032 | none |
| PRDM8    | 0.126  | 0.1615  | 1.2207 | 0.25115 | 0.418 | -5.82 | 1.24004 | none |
| SAP30BP  | 0.148  | 0.1621  | 1.2206 | 0.25122 | 0.418 | -5.82 | -0.0018 | none |
| PIM2     | -0.138 | -0.1458 | -1.22  | 0.25127 | 0.418 | -5.82 | 1.98585 | none |
| POLR3E   | 0.199  | 0.2153  | 1.2203 | 0.25132 | 0.418 | -5.82 | -0.3308 | none |
| GTF2F1   | 0.412  | 0.5169  | 1.2202 | 0.25136 | 0.418 | -5.82 | -0.0938 | none |
| TRPM5    | 0.096  | 0.0764  | 1.2201 | 0.25138 | 0.418 | -5.82 | -0.9812 | none |
| DCTN3    | -0.174 | -0.2142 | -1.22  | 0.25143 | 0.418 | -5.83 | 0.14409 | none |
| RPIA     | -0.117 | -0.0844 | -1.22  | 0.25149 | 0.418 | -5.83 | 1.75981 | none |
| TMEM63C  | 0.159  | 0.1818  | 1.2198 | 0.2515  | 0.418 | -5.83 | 0.60832 | none |
| DOCK2    | 0.351  | 0.5073  | 1.2193 | 0.25167 | 0.418 | -5.83 | -0.1783 | none |
| POLA2    | 0.152  | 0.1508  | 1.2192 | 0.25173 | 0.418 | -5.83 | -0.4461 | none |
| MTFR2    | -0.192 | -0.2421 | -1.219 | 0.25181 | 0.418 | -5.83 | 0.98942 | none |
| DNAJC9   | -0.161 | -0.1394 | -1.219 | 0.25181 | 0.418 | -5.83 | 1.57424 | none |
| MKI67    | 0.423  | 0.614   | 1.2187 | 0.25191 | 0.418 | -5.83 | -0.0576 | none |
| GAPDHS   | 0.244  | 0.286   | 1.2185 | 0.25196 | 0.418 | -5.83 | 1.68195 | none |
| TTC32    | 0.258  | 0.2109  | 1.2185 | 0.25199 | 0.418 | -5.83 | 0.24701 | none |
| COMMD8   | -0.138 | -0.1957 | -1.218 | 0.25199 | 0.418 | -5.83 | 1.18219 | none |
| DHRS4    | 0.154  | 0.1061  | 1.2184 | 0.252   | 0.418 | -5.83 | 0.58021 | none |
| UCHL3    | -0.15  | -0.1897 | -1.218 | 0.25202 | 0.418 | -5.83 | 0.64508 | none |
| RNF14    | 0.154  | 0.0485  | 1.2183 | 0.25205 | 0.418 | -5.83 | -0.4799 | none |
| UNK      | 0.173  | 0.1221  | 1.2181 | 0.2521  | 0.418 | -5.83 | -0.5781 | none |
| CPO      | -0.091 | -0.0667 | -1.218 | 0.25212 | 0.418 | -5.83 | 2.08514 | none |
| EMB      | 0.203  | 0.1319  | 1.2181 | 0.25213 | 0.418 | -5.83 | 1.32578 | none |
| H1FX     | 0.085  | 0.0928  | 1.218  | 0.25216 | 0.418 | -5.83 | 0.13876 | none |
| ZNF25    | 0.279  | 0.274   | 1.2171 | 0.25248 | 0.419 | -5.83 | -0.1785 | none |
| CAV1     | -0.1   | -0.0821 | -1.217 | 0.25249 | 0.419 | -5.83 | 0.96891 | none |
| SLC5A6   | 0.171  | 0.1152  | 1.2169 | 0.25255 | 0.419 | -5.83 | 0.99168 | none |
| CIRBP    | 0.157  | 0.1314  | 1.2162 | 0.25279 | 0.419 | -5.83 | 0.95224 | none |
| C8ORF59  | -0.196 | -0.2911 | -1.216 | 0.25293 | 0.419 | -5.83 | 0.6828  | none |
| COQ4     | 0.171  | 0.095   | 1.2158 | 0.25295 | 0.419 | -5.83 | -0.334  | none |
| RAB5A    | 0.119  | 0.0863  | 1.2157 | 0.25299 | 0.419 | -5.83 | 0.58244 | none |
| GLT8D2   | 0.243  | 0.1788  | 1.2156 | 0.25301 | 0.419 | -5.83 | 1.05848 | none |
| FGF12    | -0.27  | -0.1988 | -1.215 | 0.25338 | 0.42  | -5.83 | 1.62093 | none |
| PCDH1    | -0.12  | -0.0874 | -1.214 | 0.25347 | 0.42  | -5.83 | 0.86643 | none |

|          |        |         |        |         |       |       |         |      |
|----------|--------|---------|--------|---------|-------|-------|---------|------|
| CCDC121  | -0.125 | -0.0871 | -1.214 | 0.2535  | 0.42  | -5.83 | 1.33964 | none |
| GIMAP1-G | -0.352 | -0.2209 | -1.214 | 0.25358 | 0.42  | -5.83 | 1.52512 | none |
| AGPAT1   | 0.217  | 0.0246  | 1.2139 | 0.25364 | 0.42  | -5.83 | -0.061  | none |
| PRSS3    | 0.146  | 0.1352  | 1.2138 | 0.25368 | 0.42  | -5.83 | -0.5756 | none |
| PIGY     | 0.379  | 0.5059  | 1.2137 | 0.25373 | 0.42  | -5.83 | -0.1427 | none |
| KCNQ4    | -0.081 | -0.039  | -1.213 | 0.25386 | 0.42  | -5.83 | 0.06021 | none |
| VNN3     | -0.118 | -0.087  | -1.213 | 0.25391 | 0.42  | -5.83 | 0.1691  | none |
| OPRL1    | 0.094  | 0.0624  | 1.213  | 0.25395 | 0.42  | -5.83 | 0.21225 | none |
| C4A      | 0.312  | 0.2228  | 1.2129 | 0.25401 | 0.421 | -5.83 | 0.92463 | none |
| EIF3B    | 0.214  | 0.2897  | 1.2125 | 0.25416 | 0.421 | -5.83 | -0.3697 | none |
| ZNF217   | 0.389  | 0.4046  | 1.2123 | 0.25424 | 0.421 | -5.83 | -0.2522 | none |
| VSTM2B   | 0.079  | 0.08    | 1.2122 | 0.25425 | 0.421 | -5.83 | 0       | none |
| CYP27A1  | -0.104 | -0.0815 | -1.212 | 0.25427 | 0.421 | -5.83 | 1.57104 | none |
| CPVL     | 0.262  | 0.2144  | 1.2121 | 0.2543  | 0.421 | -5.83 | -0.7828 | none |
| RHOQ     | 0.182  | 0.2186  | 1.212  | 0.25434 | 0.421 | -5.83 | -0.3592 | none |
| MROH2A   | 0.139  | 0.1399  | 1.2115 | 0.25453 | 0.421 | -5.83 | 1.63779 | none |
| GAREM2   | 0.115  | 0.1076  | 1.2115 | 0.25453 | 0.421 | -5.83 | 0.0677  | none |
| RAD51B   | 0.218  | 0.1547  | 1.2115 | 0.25453 | 0.421 | -5.83 | -0.7059 | none |
| WNK1     | 0.455  | 0.5913  | 1.2114 | 0.25456 | 0.421 | -5.83 | -0.3333 | none |
| TNS1     | 0.196  | 0.2032  | 1.2112 | 0.25464 | 0.421 | -5.84 | 0.57872 | none |
| ENPEP    | -0.131 | -0.1397 | -1.211 | 0.25469 | 0.421 | -5.84 | 0.46044 | none |
| ARPC1B   | -0.136 | -0.0832 | -1.211 | 0.25477 | 0.421 | -5.84 | 0.97807 | none |
| INPPL1   | 0.24   | 0.3497  | 1.2106 | 0.25484 | 0.421 | -5.84 | 0.52861 | none |
| PROX1    | 0.255  | 0.2596  | 1.2106 | 0.25486 | 0.421 | -5.84 | -0.7883 | none |
| IQCH     | 0.144  | 0.0985  | 1.2105 | 0.25488 | 0.421 | -5.84 | -0.2284 | none |
| CKAP5    | 0.49   | 0.6483  | 1.2105 | 0.2549  | 0.421 | -5.84 | -0.195  | none |
| WDR60    | -0.192 | -0.1076 | -1.21  | 0.25492 | 0.421 | -5.84 | 1.25927 | none |
| TOLLIP   | 0.152  | 0.1294  | 1.2101 | 0.25504 | 0.421 | -5.84 | 0.15678 | none |
| DIMT1    | 0.152  | 0.0258  | 1.21   | 0.25505 | 0.421 | -5.84 | 0.74561 | none |
| ASB13    | -0.158 | -0.1196 | -1.21  | 0.25509 | 0.421 | -5.84 | 1.79431 | none |
| TMEM167  | -0.2   | -0.275  | -1.21  | 0.2551  | 0.421 | -5.84 | 0.71763 | none |
| CRNKL1   | 0.173  | 0.0887  | 1.2096 | 0.25521 | 0.422 | -5.84 | -0.3487 | none |
| TMEM150  | 0.2    | 0.1085  | 1.2096 | 0.25523 | 0.422 | -5.84 | -0.0436 | none |
| MXRA8    | 0.22   | 0.1899  | 1.2096 | 0.25523 | 0.422 | -5.84 | 0.19935 | none |
| MT3      | -0.218 | -0.2197 | -1.21  | 0.25525 | 0.422 | -5.84 | 1.13212 | none |
| LAMB2    | 0.224  | 0.3107  | 1.2094 | 0.25528 | 0.422 | -5.84 | 0.12605 | none |
| IL17RB   | 0.105  | 0.1178  | 1.209  | 0.25544 | 0.422 | -5.84 | 1.1035  | none |
| SF1      | 0.23   | 0.2729  | 1.2089 | 0.25548 | 0.422 | -5.84 | 0.11336 | none |
| WDR4     | 0.11   | 0.0815  | 1.2086 | 0.25557 | 0.422 | -5.84 | 0.19293 | none |
| PSMC2    | -0.102 | -0.1129 | -1.208 | 0.25564 | 0.422 | -5.84 | 1.97531 | none |

|           |        |         |        |         |       |       |         |            |
|-----------|--------|---------|--------|---------|-------|-------|---------|------------|
| C17ORF78  | 0.107  | 0.0937  | 1.2084 | 0.25566 | 0.422 | -5.84 | -0.1957 | none       |
| NMNAT2    | -0.149 | -0.1327 | -1.208 | 0.25585 | 0.422 | -5.84 | 2.11599 | AA-related |
| SLC29A3   | 0.192  | 0.1405  | 1.2078 | 0.25587 | 0.422 | -5.84 | -0.8579 | none       |
| MAP4K4    | 0.362  | 0.4309  | 1.2075 | 0.25599 | 0.422 | -5.84 | -0.5104 | none       |
| C1QTNF4   | -0.085 | -0.0761 | -1.207 | 0.25601 | 0.422 | -5.84 | 2.31129 | AA-related |
| IKBKE     | 0.138  | 0.116   | 1.2074 | 0.25601 | 0.422 | -5.84 | 0.52291 | none       |
| FAM177B   | -0.092 | -0.0606 | -1.207 | 0.2561  | 0.422 | -5.84 | 1.37395 | none       |
| LARP1B    | 0.132  | 0.1247  | 1.2072 | 0.2561  | 0.422 | -5.84 | -0.465  | none       |
| ULK3      | 0.132  | 0.156   | 1.2071 | 0.25614 | 0.422 | -5.84 | 0.66262 | none       |
| SPATS1    | -0.135 | -0.1268 | -1.207 | 0.25619 | 0.422 | -5.84 | 1.32606 | none       |
| PANX3     | 0.117  | 0.0778  | 1.2068 | 0.25623 | 0.422 | -5.84 | -1.2762 | none       |
| FTCDNL1   | -0.275 | -0.2256 | -1.206 | 0.25642 | 0.423 | -5.84 | 1.92309 | none       |
| KLK9      | -0.092 | -0.0612 | -1.206 | 0.25643 | 0.423 | -5.84 | 0.86195 | none       |
| FOXH1     | -0.111 | -0.0657 | -1.206 | 0.25643 | 0.423 | -5.84 | 1.02853 | none       |
| MED26     | 0.213  | 0.2922  | 1.2062 | 0.25647 | 0.423 | -5.84 | -0.2306 | none       |
| PSMA8     | -0.191 | -0.1708 | -1.206 | 0.25652 | 0.423 | -5.84 | 1.4096  | none       |
| FAM217A   | 0.244  | 0.3351  | 1.2052 | 0.25682 | 0.423 | -5.84 | 0.29132 | none       |
| TMCC1     | 0.272  | 0.3038  | 1.2052 | 0.25684 | 0.423 | -5.84 | -0.0888 | none       |
| RHOG      | -0.146 | -0.1359 | -1.205 | 0.25692 | 0.423 | -5.84 | 1.80811 | none       |
| TMEM179   | -0.247 | -0.2842 | -1.205 | 0.25696 | 0.423 | -5.84 | 1.84028 | none       |
| RTN4IP1   | 0.122  | -0.0121 | 1.2047 | 0.25701 | 0.423 | -5.84 | -0.2637 | none       |
| BEND4     | -0.128 | -0.1358 | -1.205 | 0.25701 | 0.423 | -5.84 | 1.48484 | none       |
| FAM136A   | 0.09   | 0.0452  | 1.2045 | 0.25709 | 0.423 | -5.84 | -0.4923 | none       |
| ZNF35     | -0.149 | -0.0753 | -1.204 | 0.25711 | 0.423 | -5.84 | 1.9149  | none       |
| PRR22     | 0.181  | 0.166   | 1.2041 | 0.25724 | 0.423 | -5.84 | 0.42332 | none       |
| CHRNE     | 0.176  | 0.1556  | 1.2041 | 0.25725 | 0.423 | -5.84 | 0.0824  | none       |
| YWHAH     | -0.081 | -0.0394 | -1.204 | 0.25726 | 0.423 | -5.84 | 1.11962 | none       |
| HIST1H2BI | 0.357  | 0.1008  | 1.204  | 0.25726 | 0.423 | -5.84 | -0.3727 | none       |
| PTRH2     | -0.116 | -0.1238 | -1.204 | 0.25727 | 0.423 | -5.84 | 0.38349 | none       |
| C11ORF45  | -0.171 | -0.1493 | -1.204 | 0.25742 | 0.424 | -5.84 | 1.63328 | none       |
| SPAG17    | 0.187  | 0.1956  | 1.2036 | 0.25742 | 0.424 | -5.84 | 1.1623  | none       |
| IL9R      | -0.236 | -0.2696 | -1.204 | 0.25746 | 0.424 | -5.84 | 1.01086 | none       |
| NCR2      | -0.12  | -0.1283 | -1.203 | 0.25751 | 0.424 | -5.84 | 0.17126 | none       |
| UPK1B     | 0.222  | 0.2031  | 1.2033 | 0.25753 | 0.424 | -5.84 | 0.01473 | none       |
| RNF181    | -0.2   | -0.2222 | -1.203 | 0.25758 | 0.424 | -5.84 | 0.63138 | none       |
| RSL1D1    | 0.504  | 0.6478  | 1.203  | 0.25763 | 0.424 | -5.84 | -0.077  | none       |
| C2CD4C    | -0.077 | -0.051  | -1.203 | 0.25773 | 0.424 | -5.84 | 1.60727 | none       |
| DCSTAMP   | 0.112  | 0.1342  | 1.2028 | 0.25774 | 0.424 | -5.84 | -0.793  | none       |
| ADAMTS1   | -0.128 | -0.1607 | -1.203 | 0.25777 | 0.424 | -5.84 | 1.06185 | none       |
| COCH      | 0.101  | 0.0228  | 1.2016 | 0.25817 | 0.424 | -5.85 | 0.67004 | none       |

|           |        |         |        |         |       |       |         |      |
|-----------|--------|---------|--------|---------|-------|-------|---------|------|
| OCSTAMP   | -0.094 | -0.0658 | -1.202 | 0.25818 | 0.424 | -5.85 | 1.24697 | none |
| THBS4     | 0.303  | 0.1983  | 1.2014 | 0.25824 | 0.424 | -5.85 | -1.0264 | none |
| KIF20A    | -0.27  | -0.0621 | -1.201 | 0.25834 | 0.425 | -5.85 | 1.66792 | none |
| LYPD6B    | -0.179 | -0.1395 | -1.201 | 0.25839 | 0.425 | -5.85 | 0.04119 | none |
| GNAT1     | -0.135 | -0.1257 | -1.201 | 0.25842 | 0.425 | -5.85 | 1.77766 | none |
| SPNS3     | -0.173 | -0.1756 | -1.2   | 0.25859 | 0.425 | -5.85 | 1.51279 | none |
| PAPPA     | -0.148 | -0.1334 | -1.2   | 0.25865 | 0.425 | -5.85 | 1.60951 | none |
| TRIM35    | 0.184  | 0.2434  | 1.1985 | 0.25929 | 0.426 | -5.85 | 1.19462 | none |
| BRCC3     | 0.347  | 0.4486  | 1.1978 | 0.25959 | 0.426 | -5.85 | -0.4266 | none |
| GUSB      | 0.136  | 0.0629  | 1.1973 | 0.25975 | 0.427 | -5.85 | 0.32691 | none |
| VAMP7     | -0.148 | -0.2204 | -1.197 | 0.25984 | 0.427 | -5.85 | 0.91334 | none |
| RNF182    | 0.101  | 0.0923  | 1.1969 | 0.25992 | 0.427 | -5.85 | -0.741  | none |
| CKAP2L    | 0.329  | 0.4017  | 1.1968 | 0.25995 | 0.427 | -5.85 | -0.2026 | none |
| RNF103-CI | -0.244 | -0.3204 | -1.197 | 0.25998 | 0.427 | -5.85 | 0.51447 | none |
| LRRC10    | 0.106  | 0.0875  | 1.1966 | 0.26001 | 0.427 | -5.85 | 0.75148 | none |
| IRF2BPL   | 0.242  | 0.2832  | 1.1959 | 0.26027 | 0.427 | -5.85 | -0.3386 | none |
| PPP1R3D   | -0.121 | -0.0901 | -1.196 | 0.26029 | 0.427 | -5.85 | 1.47094 | none |
| MRPL50    | -0.201 | -0.2248 | -1.196 | 0.2603  | 0.427 | -5.85 | 0.41034 | none |
| RABL3     | -0.128 | -0.1376 | -1.196 | 0.26034 | 0.427 | -5.85 | 0.34268 | none |
| OAZ2      | -0.143 | -0.2083 | -1.195 | 0.26054 | 0.428 | -5.85 | -0.0227 | none |
| ELMO1     | 0.18   | 0.1798  | 1.1951 | 0.26059 | 0.428 | -5.85 | -0.0721 | none |
| WFDC12    | 0.215  | 0.1287  | 1.1945 | 0.2608  | 0.428 | -5.85 | -0.9845 | none |
| KLHL17    | 0.321  | 0.3453  | 1.1943 | 0.26089 | 0.428 | -5.85 | -0.8495 | none |
| RACGAP1   | 0.105  | 0.0655  | 1.1942 | 0.26091 | 0.428 | -5.85 | 0.38627 | none |
| P2RY6     | 0.139  | 0.1448  | 1.1941 | 0.26093 | 0.428 | -5.85 | 0.19538 | none |
| BID       | 0.16   | 0.067   | 1.1938 | 0.26107 | 0.428 | -5.85 | -0.2692 | none |
| SAMD8     | 0.184  | 0.0976  | 1.1935 | 0.26119 | 0.428 | -5.86 | 0.01411 | none |
| TGS1      | 0.277  | 0.3379  | 1.1933 | 0.26125 | 0.428 | -5.86 | 0.52371 | none |
| LRRC8A    | 0.237  | 0.3321  | 1.1933 | 0.26125 | 0.428 | -5.86 | -0.0529 | none |
| ACTR8     | 0.158  | 0.1367  | 1.1931 | 0.26133 | 0.428 | -5.86 | 0.59993 | none |
| RGN       | -0.101 | -0.0681 | -1.193 | 0.26136 | 0.428 | -5.86 | 1.62648 | none |
| NPY1R     | 0.094  | 0.0947  | 1.1929 | 0.26139 | 0.428 | -5.86 | 0.71364 | none |
| NMI       | 0.201  | 0.0921  | 1.1922 | 0.26165 | 0.429 | -5.86 | -0.6768 | none |
| NDUFB2    | -0.202 | -0.2269 | -1.192 | 0.26172 | 0.429 | -5.86 | 0.61833 | none |
| UFM1      | -0.16  | -0.1386 | -1.192 | 0.26178 | 0.429 | -5.86 | 1.60037 | none |
| HIST1H2AI | 0.355  | 0.2747  | 1.1918 | 0.26181 | 0.429 | -5.86 | 0.80256 | none |
| NABP1     | 0.184  | 0.1322  | 1.1915 | 0.26191 | 0.429 | -5.86 | -0.5722 | none |
| MFSD9     | 0.158  | 0.0693  | 1.1915 | 0.26193 | 0.429 | -5.86 | 0.23295 | none |
| FAM124B   | 0.148  | 0.0967  | 1.1915 | 0.26193 | 0.429 | -5.86 | 0.34537 | none |
| GMIP      | 0.21   | 0.3039  | 1.1909 | 0.26216 | 0.429 | -5.86 | 0.80588 | none |

|          |        |         |        |         |       |       |         |            |
|----------|--------|---------|--------|---------|-------|-------|---------|------------|
| RIPK1    | 0.269  | 0.2921  | 1.1908 | 0.26217 | 0.429 | -5.86 | 0.10812 | none       |
| GSTZ1    | -0.15  | -0.1269 | -1.191 | 0.2622  | 0.429 | -5.86 | 0.91169 | none       |
| SNAI2    | -0.102 | -0.0974 | -1.191 | 0.26222 | 0.429 | -5.86 | 1.26543 | none       |
| SNAP91   | -0.12  | -0.112  | -1.19  | 0.26234 | 0.429 | -5.86 | -0.1319 | none       |
| PHF5A    | -0.151 | -0.1949 | -1.19  | 0.26236 | 0.429 | -5.86 | -0.2325 | none       |
| 2-Mar    | -0.097 | -0.0998 | -1.19  | 0.26237 | 0.429 | -5.86 | -0.601  | none       |
| DPEP2    | 0.164  | 0.093   | 1.1901 | 0.26243 | 0.429 | -5.86 | -0.144  | none       |
| CCER1    | 0.089  | 0.0623  | 1.1901 | 0.26244 | 0.429 | -5.86 | -0.9612 | none       |
| UBE2W    | 0.211  | 0.0036  | 1.1899 | 0.26252 | 0.43  | -5.86 | -0.3059 | none       |
| FKBP7    | 0.2    | 0.1078  | 1.1892 | 0.26279 | 0.43  | -5.86 | 1.48625 | none       |
| ILDR1    | 0.113  | 0.1056  | 1.1891 | 0.26282 | 0.43  | -5.86 | 0.98807 | none       |
| AC016734 | 0.242  | 0.2423  | 1.1891 | 0.26283 | 0.43  | -5.86 | -0.2407 | none       |
| IRF2     | -0.097 | -0.0842 | -1.188 | 0.2631  | 0.43  | -5.86 | 2.12091 | AA-related |
| FAM71A   | -0.081 | -0.0653 | -1.188 | 0.26329 | 0.431 | -5.86 | 1.44676 | none       |
| GOLGA6L5 | 0.148  | 0.1208  | 1.1875 | 0.26344 | 0.431 | -5.86 | -0.3837 | none       |
| RNF113B  | 0.087  | 0.0686  | 1.1874 | 0.26345 | 0.431 | -5.86 | 0       | none       |
| IRS1     | -0.137 | -0.0741 | -1.187 | 0.26346 | 0.431 | -5.86 | 0.19106 | none       |
| TVP23B   | -0.147 | -0.2383 | -1.187 | 0.2635  | 0.431 | -5.86 | 0.41961 | none       |
| WRAP73   | -0.115 | -0.0812 | -1.187 | 0.2635  | 0.431 | -5.86 | 1.27868 | none       |
| C2ORF42  | -0.214 | -0.1255 | -1.187 | 0.26375 | 0.431 | -5.86 | 0.75064 | none       |
| TMEM51   | 0.106  | 0.1015  | 1.1862 | 0.26391 | 0.431 | -5.86 | 1.54144 | none       |
| LYPD8    | -0.095 | -0.0947 | -1.186 | 0.26399 | 0.431 | -5.86 | 0.68574 | none       |
| CHERP    | 0.281  | 0.3845  | 1.1853 | 0.26426 | 0.432 | -5.86 | -0.0684 | none       |
| DRD4     | -0.213 | -0.1748 | -1.185 | 0.2644  | 0.432 | -5.86 | 0.42575 | none       |
| HAGHL    | 0.291  | 0.1985  | 1.1848 | 0.26444 | 0.432 | -5.86 | -0.3621 | none       |
| PRDM6    | -0.084 | -0.0567 | -1.185 | 0.26447 | 0.432 | -5.86 | 1.04178 | none       |
| CRADD    | -0.229 | -0.2737 | -1.185 | 0.26447 | 0.432 | -5.86 | 0.9084  | none       |
| KCNMA1   | 0.162  | 0.1875  | 1.1846 | 0.26453 | 0.432 | -5.87 | 0.22206 | none       |
| EPHB6    | 0.286  | 0.2358  | 1.1843 | 0.26461 | 0.432 | -5.87 | 0.51033 | none       |
| FUBP1    | 0.249  | 0.2908  | 1.1842 | 0.26468 | 0.432 | -5.87 | -0.1565 | none       |
| HTR4     | 0.093  | 0.1046  | 1.1841 | 0.26469 | 0.432 | -5.87 | -0.8317 | none       |
| UBE2J2   | 0.147  | 0.1094  | 1.1839 | 0.26476 | 0.432 | -5.87 | -0.7987 | none       |
| AP5B1    | 0.106  | 0.1086  | 1.1837 | 0.26484 | 0.432 | -5.87 | -0.2546 | none       |
| IRX2     | 0.084  | 0.0886  | 1.1835 | 0.26494 | 0.432 | -5.87 | -0.4808 | none       |
| SPATA2L  | 0.096  | 0.0301  | 1.1833 | 0.26499 | 0.433 | -5.87 | 0.39875 | none       |
| NRXN3    | 0.152  | 0.1164  | 1.1833 | 0.26502 | 0.433 | -5.87 | -0.4206 | none       |
| ANK2     | 0.229  | 0.2077  | 1.1829 | 0.26517 | 0.433 | -5.87 | 0.21154 | none       |
| RAB39A   | 0.161  | 0.1036  | 1.1825 | 0.2653  | 0.433 | -5.87 | -0.5929 | none       |
| NAP1L4   | 0.153  | 0.1512  | 1.1825 | 0.26532 | 0.433 | -5.87 | 0.3661  | none       |
| THRAP3   | 0.401  | 0.5279  | 1.1822 | 0.26541 | 0.433 | -5.87 | -0.1122 | none       |

|          |        |         |        |         |       |       |         |      |
|----------|--------|---------|--------|---------|-------|-------|---------|------|
| GOLGA7B  | -0.087 | -0.0638 | -1.182 | 0.26546 | 0.433 | -5.87 | 1.46065 | none |
| MPC2     | -0.195 | -0.2142 | -1.181 | 0.26571 | 0.433 | -5.87 | 0.38336 | none |
| DDX3Y    | 0.105  | 0.1281  | 1.1814 | 0.26573 | 0.433 | -5.87 | 1.17436 | none |
| SPDL1    | 0.345  | 0.4078  | 1.1811 | 0.26585 | 0.434 | -5.87 | 0.78169 | none |
| GUK1     | -0.175 | -0.1754 | -1.181 | 0.26587 | 0.434 | -5.87 | 1.51532 | none |
| PLCL1    | 0.176  | 0.1866  | 1.1809 | 0.2659  | 0.434 | -5.87 | -0.1288 | none |
| HTATIP2  | -0.142 | -0.2059 | -1.181 | 0.26596 | 0.434 | -5.87 | 1.21671 | none |
| RAC1     | -0.225 | -0.208  | -1.181 | 0.26603 | 0.434 | -5.87 | 0.9442  | none |
| CCNY     | -0.14  | -0.2059 | -1.181 | 0.26605 | 0.434 | -5.87 | 0.48163 | none |
| SCGB2B2  | 0.172  | 0.1442  | 1.1795 | 0.26645 | 0.434 | -5.87 | -0.0963 | none |
| POLE4    | -0.149 | -0.1803 | -1.179 | 0.26648 | 0.434 | -5.87 | 2.08849 | none |
| MAP3K6   | -0.295 | -0.2802 | -1.179 | 0.26652 | 0.434 | -5.87 | 0.50824 | none |
| SESN3    | 0.181  | 0.091   | 1.1793 | 0.26654 | 0.434 | -5.87 | 0.8737  | none |
| BEX2     | -0.28  | -0.3981 | -1.179 | 0.26655 | 0.434 | -5.87 | 0.61848 | none |
| MAGEA9B  | -0.086 | -0.0596 | -1.179 | 0.26656 | 0.434 | -5.87 | -0.5771 | none |
| GPRASP2  | 0.127  | 0.1048  | 1.1788 | 0.26671 | 0.434 | -5.87 | -0.4525 | none |
| ARL4C    | -0.177 | -0.1596 | -1.179 | 0.26678 | 0.435 | -5.87 | 1.71145 | none |
| IL6      | 0.133  | 0.1249  | 1.1779 | 0.26704 | 0.435 | -5.87 | -0.8494 | none |
| FURIN    | 0.228  | 0.3143  | 1.1778 | 0.26708 | 0.435 | -5.87 | -0.2226 | none |
| DUPD1    | 0.09   | 0.068   | 1.1778 | 0.26709 | 0.435 | -5.87 | 0.10136 | none |
| WIF1     | 0.13   | 0.1387  | 1.1775 | 0.26721 | 0.435 | -5.87 | 0.53554 | none |
| GDAP1L1  | -0.12  | -0.0972 | -1.177 | 0.26725 | 0.435 | -5.87 | 0.20605 | none |
| CYP1A1   | -0.15  | -0.1104 | -1.177 | 0.26735 | 0.435 | -5.87 | 0.4653  | none |
| SLC25A39 | -0.168 | -0.1651 | -1.177 | 0.26737 | 0.435 | -5.87 | 1.55347 | none |
| GTF2H5   | -0.219 | -0.2548 | -1.177 | 0.26743 | 0.435 | -5.87 | 0.97159 | none |
| ADH7     | 0.181  | 0.194   | 1.1762 | 0.26772 | 0.436 | -5.87 | 0.89896 | none |
| PNMA3    | 0.164  | 0.106   | 1.1757 | 0.26791 | 0.436 | -5.88 | -0.4134 | none |
| ASCC3    | 0.302  | 0.3732  | 1.1752 | 0.26806 | 0.436 | -5.88 | 0.27604 | none |
| CRIP1    | -0.21  | -0.3164 | -1.175 | 0.26811 | 0.436 | -5.88 | 1.31614 | none |
| WWTR1    | 0.184  | 0.1265  | 1.1749 | 0.26819 | 0.436 | -5.88 | -0.2689 | none |
| PLAT     | 0.207  | 0.2259  | 1.1748 | 0.26822 | 0.436 | -5.88 | -0.5785 | none |
| EID3     | 0.202  | 0.1643  | 1.1748 | 0.26824 | 0.436 | -5.88 | 0.43995 | none |
| GRIP2    | -0.078 | -0.0598 | -1.173 | 0.26896 | 0.437 | -5.88 | -0.155  | none |
| SURF6    | 0.29   | 0.3592  | 1.1719 | 0.26933 | 0.438 | -5.88 | -0.293  | none |
| SIGLEC14 | 0.093  | 0.058   | 1.1718 | 0.26936 | 0.438 | -5.88 | 0.78112 | none |
| SP5      | -0.096 | -0.0564 | -1.172 | 0.2694  | 0.438 | -5.88 | 1.11127 | none |
| SUMO1    | -0.115 | -0.1667 | -1.172 | 0.26941 | 0.438 | -5.88 | 0.45164 | none |
| NADSYN1  | 0.107  | 0.1035  | 1.1717 | 0.26943 | 0.438 | -5.88 | -0.8031 | none |
| CCDC186  | 0.314  | 0.3152  | 1.1716 | 0.26945 | 0.438 | -5.88 | -0.1418 | none |
| GLRX3    | 0.102  | 0.0065  | 1.1711 | 0.26964 | 0.438 | -5.88 | -0.3929 | none |

|         |        |         |        |         |       |       |         |      |
|---------|--------|---------|--------|---------|-------|-------|---------|------|
| NAA20   | -0.14  | -0.1868 | -1.171 | 0.26978 | 0.438 | -5.88 | 0.89231 | none |
| TCF24   | -0.134 | -0.1064 | -1.17  | 0.26993 | 0.439 | -5.88 | 0.85401 | none |
| OXER1   | 0.117  | 0.0839  | 1.1702 | 0.26998 | 0.439 | -5.88 | 0.34923 | none |
| AIFM1   | 0.122  | 0.08    | 1.1702 | 0.26998 | 0.439 | -5.88 | -0.1821 | none |
| TAMM41  | 0.094  | -0.0033 | 1.1701 | 0.27003 | 0.439 | -5.88 | -0.6643 | none |
| NME8    | -0.131 | -0.1395 | -1.169 | 0.27032 | 0.439 | -5.88 | -0.2082 | none |
| TBATA   | -0.08  | -0.0738 | -1.169 | 0.27037 | 0.439 | -5.88 | 1.67922 | none |
| ROBO4   | -0.078 | -0.046  | -1.169 | 0.27039 | 0.439 | -5.88 | 0.64386 | none |
| KCNN3   | 0.092  | 0.0518  | 1.169  | 0.27046 | 0.439 | -5.88 | 0.46316 | none |
| MAFK    | 0.158  | 0.2235  | 1.1687 | 0.27057 | 0.439 | -5.88 | -0.4312 | none |
| TTI2    | -0.133 | -0.1472 | -1.168 | 0.27085 | 0.44  | -5.88 | 0.27743 | none |
| KLHL23  | 0.131  | 0.1336  | 1.1679 | 0.27088 | 0.44  | -5.88 | -0.2161 | none |
| EPB41L5 | -0.218 | -0.2363 | -1.168 | 0.27102 | 0.44  | -5.88 | 0.4057  | none |
| UQCRC1  | -0.126 | -0.1105 | -1.167 | 0.27118 | 0.44  | -5.88 | 0.94804 | none |
| COL9A3  | 0.329  | 0.3116  | 1.167  | 0.27122 | 0.44  | -5.88 | -0.0426 | none |
| GOS2    | 0.163  | 0.1442  | 1.1669 | 0.27124 | 0.44  | -5.88 | -0.4439 | none |
| FAR2    | -0.244 | -0.3057 | -1.166 | 0.27145 | 0.44  | -5.89 | 0.26737 | none |
| SERP1   | -0.176 | -0.2012 | -1.166 | 0.27149 | 0.44  | -5.89 | 0.92044 | none |
| CAMKK1  | -0.099 | -0.025  | -1.166 | 0.27179 | 0.441 | -5.89 | 1.39527 | none |
| VASH1   | 0.214  | 0.1872  | 1.1654 | 0.27185 | 0.441 | -5.89 | 0.26635 | none |
| TEAD4   | 0.119  | 0.1748  | 1.1652 | 0.27192 | 0.441 | -5.89 | 1.89686 | none |
| KRT19   | 0.092  | 0.0884  | 1.1651 | 0.27194 | 0.441 | -5.89 | -0.0282 | none |
| ORMDL3  | 0.202  | 0.2027  | 1.165  | 0.272   | 0.441 | -5.89 | -0.5312 | none |
| MARK4   | 0.264  | 0.3503  | 1.1648 | 0.27208 | 0.441 | -5.89 | -0.3357 | none |
| OR2A4   | -0.093 | -0.0692 | -1.165 | 0.27208 | 0.441 | -5.89 | 0.31285 | none |
| TFAM    | -0.088 | -0.0974 | -1.165 | 0.2721  | 0.441 | -5.89 | 1.89986 | none |
| SYN1    | -0.101 | -0.0786 | -1.164 | 0.27224 | 0.441 | -5.89 | 1.29738 | none |
| NFATC2  | 0.259  | 0.3269  | 1.1642 | 0.2723  | 0.441 | -5.89 | -0.2426 | none |
| ZCCHC24 | 0.095  | 0.1092  | 1.164  | 0.27236 | 0.441 | -5.89 | 1.00548 | none |
| AMPD2   | 0.109  | 0.1717  | 1.1634 | 0.2726  | 0.442 | -5.89 | 1.08642 | none |
| HMHB1   | 0.2    | 0.2078  | 1.1629 | 0.27281 | 0.442 | -5.89 | 1.23597 | none |
| MAP4K2  | 0.117  | 0.2011  | 1.1627 | 0.27288 | 0.442 | -5.89 | 0.42989 | none |
| DPM1    | -0.154 | -0.2388 | -1.162 | 0.27307 | 0.442 | -5.89 | 0.7847  | none |
| MICU3   | -0.173 | -0.0768 | -1.162 | 0.27312 | 0.442 | -5.89 | 1.6303  | none |
| CTSE    | 0.136  | 0.1373  | 1.1617 | 0.27327 | 0.443 | -5.89 | 0.48971 | none |
| OSR1    | 0.129  | 0.092   | 1.1616 | 0.27333 | 0.443 | -5.89 | -0.9842 | none |
| KLHDC8A | 0.096  | 0.0965  | 1.1614 | 0.2734  | 0.443 | -5.89 | -0.5242 | none |
| SLC9C2  | -0.206 | -0.2058 | -1.161 | 0.27341 | 0.443 | -5.89 | 0.51327 | none |
| SLC31A2 | -0.217 | -0.3077 | -1.161 | 0.27344 | 0.443 | -5.89 | 0.08206 | none |
| NAGK    | 0.148  | 0.0789  | 1.1606 | 0.27371 | 0.443 | -5.89 | -0.3155 | none |



|          |        |         |        |         |       |       |         |      |
|----------|--------|---------|--------|---------|-------|-------|---------|------|
| P2RX5    | 0.181  | 0.2248  | 1.1603 | 0.2738  | 0.443 | -5.89 | 0.28198 | none |
| GJA4     | -0.094 | -0.0819 | -1.16  | 0.27386 | 0.443 | -5.89 | 1.57402 | none |
| OASL     | -0.164 | -0.118  | -1.16  | 0.27391 | 0.443 | -5.89 | 1.29139 | none |
| TRUB1    | -0.249 | -0.1648 | -1.16  | 0.27399 | 0.443 | -5.89 | 1.57184 | none |
| MT-ND5   | 0.37   | 0.4642  | 1.1596 | 0.27407 | 0.443 | -5.89 | -0.2419 | none |
| KRTAP4-9 | 0.168  | 0.1619  | 1.1593 | 0.2742  | 0.444 | -5.89 | 1.29901 | none |
| CCDC144N | -0.168 | -0.0761 | -1.159 | 0.27421 | 0.444 | -5.89 | 0.48543 | none |
| TP53BP2  | 0.322  | 0.4066  | 1.1587 | 0.27442 | 0.444 | -5.89 | -0.3276 | none |
| MYO15B   | 0.215  | 0.169   | 1.1582 | 0.27462 | 0.444 | -5.89 | 0.28663 | none |
| PLXNA3   | 0.23   | 0.2608  | 1.1581 | 0.27468 | 0.444 | -5.89 | -0.4568 | none |
| CYP4A22  | 0.089  | 0.0809  | 1.158  | 0.27469 | 0.444 | -5.89 | -1.0473 | none |
| OSBPL10  | 0.29   | 0.2521  | 1.1575 | 0.27489 | 0.445 | -5.9  | -0.0741 | none |
| DGCR6    | 0.376  | 0.3036  | 1.1573 | 0.27496 | 0.445 | -5.9  | -0.4297 | none |
| CHST10   | 0.202  | 0.2765  | 1.157  | 0.27508 | 0.445 | -5.9  | 0.18629 | none |
| SRPX     | 0.085  | 0.0603  | 1.157  | 0.27511 | 0.445 | -5.9  | 0.78011 | none |
| CNTF     | 0.095  | 0.1234  | 1.1569 | 0.27513 | 0.445 | -5.9  | -0.4192 | none |
| DIAPH2   | 0.191  | 0.2383  | 1.1568 | 0.27516 | 0.445 | -5.9  | -0.0416 | none |
| PTMS     | 0.217  | 0.1263  | 1.1564 | 0.27533 | 0.445 | -5.9  | -0.8719 | none |
| CLEC18A  | 0.081  | 0.0843  | 1.1561 | 0.27543 | 0.445 | -5.9  | -0.3653 | none |
| TRIM34   | 0.21   | 0.0273  | 1.1561 | 0.27546 | 0.445 | -5.9  | -0.7121 | none |
| PAGE2B   | -0.146 | -0.1531 | -1.156 | 0.27551 | 0.445 | -5.9  | 0.93899 | none |
| FCAMR    | -0.091 | -0.0825 | -1.156 | 0.27552 | 0.445 | -5.9  | 0.24837 | none |
| TNNI2    | -0.1   | -0.1133 | -1.156 | 0.27555 | 0.445 | -5.9  | -0.1499 | none |
| FZD6     | 0.164  | 0.0764  | 1.1557 | 0.2756  | 0.445 | -5.9  | -0.4789 | none |
| TNFAIP3  | 0.26   | 0.3699  | 1.1554 | 0.27572 | 0.445 | -5.9  | 0.34152 | none |
| GALNT18  | 0.136  | 0.1752  | 1.1553 | 0.27577 | 0.445 | -5.9  | 1.43611 | none |
| CHRN3    | 0.13   | 0.0786  | 1.155  | 0.27588 | 0.445 | -5.9  | 0.98785 | none |
| TEX13C   | 0.085  | 0.0598  | 1.1544 | 0.27611 | 0.446 | -5.9  | -1.247  | none |
| CTRL     | 0.276  | 0.2924  | 1.1543 | 0.27614 | 0.446 | -5.9  | -0.6269 | none |
| UBE2B    | -0.183 | -0.2595 | -1.154 | 0.27627 | 0.446 | -5.9  | 1.20877 | none |
| CUZD1    | 0.112  | 0.0892  | 1.1538 | 0.27633 | 0.446 | -5.9  | -0.5526 | none |
| GIT1     | 0.297  | 0.4232  | 1.1533 | 0.27656 | 0.446 | -5.9  | -0.4462 | none |
| MBOAT1   | -0.11  | -0.1232 | -1.153 | 0.27657 | 0.446 | -5.9  | 1.07664 | none |
| GAL3ST3  | 0.118  | 0.1059  | 1.153  | 0.27665 | 0.446 | -5.9  | -0.8618 | none |
| TIMM21   | 0.144  | 0.0814  | 1.1526 | 0.27683 | 0.447 | -5.9  | -0.3339 | none |
| KDEL2    | -0.178 | -0.2293 | -1.152 | 0.27687 | 0.447 | -5.9  | 1.57122 | none |
| IGSF23   | -0.123 | -0.1319 | -1.152 | 0.27703 | 0.447 | -5.9  | 1.09881 | none |
| HS3ST5   | 0.165  | 0.1647  | 1.1518 | 0.27713 | 0.447 | -5.9  | 0.48003 | none |
| CUEDC2   | 0.1    | 0.1074  | 1.1516 | 0.27719 | 0.447 | -5.9  | -0.9704 | none |
| ALDH1A2  | 0.193  | 0.1711  | 1.1516 | 0.27721 | 0.447 | -5.9  | -0.9229 | none |

|         |        |         |        |         |       |       |         |      |
|---------|--------|---------|--------|---------|-------|-------|---------|------|
| PXT1    | 0.114  | 0.0687  | 1.1516 | 0.27722 | 0.447 | -5.9  | 0.07266 | none |
| FBXO8   | -0.235 | -0.2937 | -1.151 | 0.27728 | 0.447 | -5.9  | 1.16667 | none |
| FMR1    | 0.278  | 0.3328  | 1.1511 | 0.27738 | 0.447 | -5.9  | 0.39611 | none |
| TRHDE   | -0.123 | -0.103  | -1.151 | 0.27741 | 0.447 | -5.9  | 2.0499  | none |
| TMTC4   | 0.21   | 0.2338  | 1.151  | 0.27744 | 0.447 | -5.9  | 1.11599 | none |
| CMC2    | -0.153 | -0.1973 | -1.151 | 0.27747 | 0.447 | -5.9  | 1.36067 | none |
| GOT2    | 0.108  | 0.0705  | 1.1506 | 0.27759 | 0.447 | -5.9  | 1.12822 | none |
| UBE2K   | 0.092  | 0.0305  | 1.1505 | 0.27765 | 0.447 | -5.9  | -0.4293 | none |
| TNP2    | 0.099  | 0.1089  | 1.1501 | 0.27778 | 0.448 | -5.9  | 1.11911 | none |
| BTBD6   | -0.154 | -0.1289 | -1.149 | 0.27809 | 0.448 | -5.9  | 0.45349 | none |
| ZNF267  | 0.208  | 0.2085  | 1.149  | 0.27822 | 0.448 | -5.9  | 0.57948 | none |
| PBX2    | 0.137  | 0.1051  | 1.149  | 0.27824 | 0.448 | -5.9  | -0.3968 | none |
| RPL34   | -0.211 | -0.2745 | -1.149 | 0.27834 | 0.448 | -5.9  | 0.75859 | none |
| THAP1   | 0.196  | 0.1977  | 1.1484 | 0.27846 | 0.448 | -5.91 | 0.54365 | none |
| CSNK1A1 | 0.11   | 0.094   | 1.1483 | 0.27851 | 0.449 | -5.91 | 0.61367 | none |
| CXCL1   | -0.116 | -0.1295 | -1.148 | 0.27855 | 0.449 | -5.91 | 1.42844 | none |
| CDK20   | -0.201 | -0.1277 | -1.148 | 0.27856 | 0.449 | -5.91 | 1.76809 | none |
| KHDC1   | 0.254  | 0.0651  | 1.148  | 0.27862 | 0.449 | -5.91 | -0.2249 | none |
| CCL25   | 0.104  | 0.1706  | 1.1478 | 0.27868 | 0.449 | -5.91 | 0.9886  | none |
| NAXE    | -0.188 | -0.2069 | -1.148 | 0.27869 | 0.449 | -5.91 | 0.50202 | none |
| MUC6    | 0.093  | 0.0832  | 1.1476 | 0.27877 | 0.449 | -5.91 | -0.3951 | none |
| ENTPD7  | 0.176  | 0.1716  | 1.1475 | 0.2788  | 0.449 | -5.91 | -0.209  | none |
| PRPF4B  | 0.443  | 0.5452  | 1.1475 | 0.27881 | 0.449 | -5.91 | -0.1559 | none |
| RHBDL1  | 0.109  | 0.0935  | 1.1471 | 0.27896 | 0.449 | -5.91 | 1.66228 | none |
| AQP10   | 0.123  | 0.1302  | 1.1468 | 0.27908 | 0.449 | -5.91 | -0.273  | none |
| EFNA5   | -0.105 | -0.0814 | -1.147 | 0.27915 | 0.449 | -5.91 | 0.45808 | none |
| SPAG11B | 0.119  | 0.1188  | 1.1465 | 0.27919 | 0.449 | -5.91 | 0.77714 | none |
| GEM     | -0.286 | -0.1676 | -1.146 | 0.27922 | 0.449 | -5.91 | 1.27786 | none |
| ANAPC4  | 0.113  | 0.0603  | 1.1464 | 0.27923 | 0.449 | -5.91 | -0.5272 | none |
| NR1D1   | 0.16   | 0.2082  | 1.1453 | 0.27967 | 0.45  | -5.91 | -0.2609 | none |
| BDH1    | 0.232  | 0.2026  | 1.1448 | 0.27988 | 0.45  | -5.91 | 0.21983 | none |
| GHSR    | 0.151  | 0.0741  | 1.1445 | 0.27998 | 0.45  | -5.91 | -0.5485 | none |
| NPBWR2  | 0.084  | 0.0591  | 1.1445 | 0.27999 | 0.45  | -5.91 | 0       | none |
| DHX9    | 0.198  | 0.2726  | 1.1442 | 0.28012 | 0.45  | -5.91 | 0.33181 | none |
| CCDC38  | 0.174  | 0.0562  | 1.1441 | 0.28015 | 0.45  | -5.91 | -1.1181 | none |
| ACTL6B  | -0.241 | -0.2407 | -1.144 | 0.28025 | 0.45  | -5.91 | 1.31926 | none |
| MMGT1   | -0.189 | -0.2297 | -1.144 | 0.28029 | 0.45  | -5.91 | 1.47106 | none |
| SGK1    | 0.142  | 0.0665  | 1.1435 | 0.28041 | 0.451 | -5.91 | 0.29934 | none |
| REEP6   | 0.249  | 0.2092  | 1.1432 | 0.28051 | 0.451 | -5.91 | -0.2921 | none |
| MKLN1   | 0.133  | 0.1611  | 1.143  | 0.2806  | 0.451 | -5.91 | 0.74161 | none |

|           |        |         |        |         |       |       |         |      |
|-----------|--------|---------|--------|---------|-------|-------|---------|------|
| CRIP3     | -0.211 | -0.1448 | -1.143 | 0.28069 | 0.451 | -5.91 | 0.39343 | none |
| PERP      | -0.149 | -0.1912 | -1.143 | 0.28078 | 0.451 | -5.91 | 1.57301 | none |
| HGD       | -0.217 | -0.1909 | -1.142 | 0.28081 | 0.451 | -5.91 | 1.63813 | none |
| AC011043  | 0.162  | 0.0782  | 1.1424 | 0.28084 | 0.451 | -5.91 | -0.0989 | none |
| ZBTB7B    | 0.167  | 0.2417  | 1.1423 | 0.28088 | 0.451 | -5.91 | 0.74801 | none |
| ZNHIT3    | 0.135  | -0.0441 | 1.1417 | 0.2811  | 0.451 | -5.91 | -0.0694 | none |
| HAUS4     | -0.144 | -0.1371 | -1.141 | 0.28124 | 0.452 | -5.91 | 1.96136 | none |
| SRSF2     | -0.156 | -0.1702 | -1.141 | 0.28147 | 0.452 | -5.91 | 1.86099 | none |
| PPP3CA    | 0.177  | 0.1428  | 1.1407 | 0.28151 | 0.452 | -5.91 | -0.3725 | none |
| IFNL3     | 0.093  | 0.1251  | 1.1405 | 0.28157 | 0.452 | -5.91 | -0.1543 | none |
| MYOCD     | -0.082 | -0.0571 | -1.14  | 0.2816  | 0.452 | -5.91 | -0.3269 | none |
| CDK5RAP1  | 0.095  | 0.0258  | 1.1403 | 0.28165 | 0.452 | -5.91 | -0.5649 | none |
| SLC25A46  | 0.151  | 0.0707  | 1.1403 | 0.28166 | 0.452 | -5.91 | 0.5433  | none |
| TAS2R50   | -0.077 | -0.0699 | -1.14  | 0.28172 | 0.452 | -5.91 | 0       | none |
| PRSS37    | 0.086  | 0.0842  | 1.1399 | 0.2818  | 0.452 | -5.91 | 1.40684 | none |
| SLC1A1    | 0.176  | 0.2017  | 1.1399 | 0.28183 | 0.452 | -5.91 | 1.17776 | none |
| SPINT1    | 0.168  | 0.2022  | 1.1398 | 0.28187 | 0.452 | -5.91 | 0.5544  | none |
| CKAP4     | 0.209  | 0.2354  | 1.1398 | 0.28187 | 0.452 | -5.91 | -0.5873 | none |
| CCND3     | -0.118 | -0.1249 | -1.14  | 0.28187 | 0.452 | -5.91 | 2.06309 | none |
| HTRA2     | -0.127 | -0.1073 | -1.139 | 0.28201 | 0.452 | -5.91 | 1.83902 | none |
| ABCD2     | -0.105 | -0.0757 | -1.139 | 0.28206 | 0.452 | -5.91 | 1.45999 | none |
| EZR       | 0.244  | 0.3124  | 1.1389 | 0.28221 | 0.452 | -5.92 | 0.04057 | none |
| USP15     | 0.235  | 0.2458  | 1.1385 | 0.28239 | 0.453 | -5.92 | -0.5681 | none |
| SHTN1     | 0.231  | 0.1936  | 1.1384 | 0.28243 | 0.453 | -5.92 | 0.2456  | none |
| CCDC15    | 0.179  | 0.1907  | 1.1382 | 0.28248 | 0.453 | -5.92 | -0.7771 | none |
| GTPBP4    | 0.186  | 0.206   | 1.138  | 0.28256 | 0.453 | -5.92 | 0.23128 | none |
| GPB1      | -0.155 | -0.0914 | -1.138 | 0.28258 | 0.453 | -5.92 | 1.79988 | none |
| TMED10    | -0.143 | -0.1767 | -1.138 | 0.28266 | 0.453 | -5.92 | -0.2093 | none |
| HIST1H2AI | -0.248 | -0.2237 | -1.138 | 0.28276 | 0.453 | -5.92 | 1.55807 | none |
| PHF21B    | 0.182  | 0.1465  | 1.1372 | 0.28287 | 0.453 | -5.92 | -0.4275 | none |
| ZMYM4     | 0.372  | 0.4937  | 1.137  | 0.28297 | 0.453 | -5.92 | 0.95223 | none |
| CAMKV     | 0.096  | 0.0688  | 1.1369 | 0.283   | 0.453 | -5.92 | -0.8744 | none |
| TSPAN14   | 0.125  | 0.0617  | 1.1365 | 0.28316 | 0.454 | -5.92 | 0.12001 | none |
| SKIV2L    | -0.267 | -0.264  | -1.136 | 0.28329 | 0.454 | -5.92 | 1.28873 | none |
| KLRF1     | -0.137 | -0.1156 | -1.136 | 0.2833  | 0.454 | -5.92 | 0.61342 | none |
| TSSK2     | -0.122 | -0.1202 | -1.136 | 0.28333 | 0.454 | -5.92 | 0.24163 | none |
| ATG4B     | 0.132  | 0.1265  | 1.1359 | 0.28341 | 0.454 | -5.92 | 0.76648 | none |
| PCNX3     | 0.241  | 0.348   | 1.1357 | 0.2835  | 0.454 | -5.92 | -0.4365 | none |
| TMEM117   | 0.238  | 0.1779  | 1.1355 | 0.28355 | 0.454 | -5.92 | -0.4363 | none |
| A1BG      | 0.26   | 0.1102  | 1.1355 | 0.28357 | 0.454 | -5.92 | -0.7324 | none |

|           |        |         |        |         |       |       |         |            |
|-----------|--------|---------|--------|---------|-------|-------|---------|------------|
| CDH23     | 0.182  | 0.1396  | 1.1354 | 0.2836  | 0.454 | -5.92 | -0.1388 | none       |
| R3HDML    | 0.121  | 0.0959  | 1.1348 | 0.28386 | 0.454 | -5.92 | -0.928  | none       |
| REEP1     | 0.104  | 0.1208  | 1.1344 | 0.28401 | 0.454 | -5.92 | 0.41097 | none       |
| MOB2      | 0.246  | 0.2434  | 1.1339 | 0.28419 | 0.455 | -5.92 | 0.73956 | none       |
| SNX8      | 0.138  | 0.1054  | 1.1339 | 0.2842  | 0.455 | -5.92 | 0.80815 | none       |
| KRTAP21-3 | 0.231  | 0.2315  | 1.1338 | 0.28426 | 0.455 | -5.92 | 0.66005 | none       |
| DKK3      | 0.09   | 0.0881  | 1.1337 | 0.28427 | 0.455 | -5.92 | 1.52019 | none       |
| C6ORF47   | 0.225  | 0.1608  | 1.1337 | 0.28428 | 0.455 | -5.92 | -0.6994 | none       |
| ZCWPW1    | 0.113  | 0.1017  | 1.1337 | 0.2843  | 0.455 | -5.92 | 0.35312 | none       |
| CEP78     | 0.177  | 0.2298  | 1.1335 | 0.28435 | 0.455 | -5.92 | 0.33673 | none       |
| FOXB1     | 0.142  | 0.1518  | 1.1335 | 0.28436 | 0.455 | -5.92 | -0.146  | none       |
| PPP1R14A  | -0.145 | -0.1582 | -1.133 | 0.28437 | 0.455 | -5.92 | 0.45078 | none       |
| SLC16A13  | -0.115 | -0.0577 | -1.133 | 0.28454 | 0.455 | -5.92 | 2.04542 | none       |
| PIGH      | 0.138  | 0.0588  | 1.1324 | 0.28479 | 0.455 | -5.92 | -0.0611 | none       |
| ZMYND10   | -0.19  | -0.1328 | -1.132 | 0.28483 | 0.455 | -5.92 | 1.026   | none       |
| C19ORF38  | -0.164 | -0.1776 | -1.132 | 0.28485 | 0.455 | -5.92 | 0.74151 | none       |
| SNX14     | 0.183  | 0.0965  | 1.1322 | 0.28487 | 0.455 | -5.92 | 1.29336 | none       |
| ZNF143    | 0.205  | 0.2124  | 1.1319 | 0.28499 | 0.455 | -5.92 | -0.4507 | none       |
| NT5C3A    | 0.163  | 0.0208  | 1.1317 | 0.28508 | 0.455 | -5.92 | 0.29786 | none       |
| OR4C3     | -0.081 | -0.081  | -1.132 | 0.28508 | 0.455 | -5.92 | 1.63945 | none       |
| FGFRL1    | 0.185  | 0.201   | 1.1317 | 0.28508 | 0.455 | -5.92 | 0.19477 | none       |
| MT1E      | -0.241 | -0.2438 | -1.131 | 0.28532 | 0.456 | -5.92 | 1.65293 | none       |
| ABR       | 0.5    | 0.3389  | 1.1306 | 0.28553 | 0.456 | -5.92 | -0.9425 | none       |
| LOXL1     | 0.25   | 0.2564  | 1.1304 | 0.28562 | 0.456 | -5.92 | 0.97923 | none       |
| STARD13   | -0.09  | -0.0698 | -1.13  | 0.28563 | 0.456 | -5.92 | -0.4192 | none       |
| SLC39A7   | -0.268 | -0.1438 | -1.13  | 0.28571 | 0.456 | -5.92 | 1.01817 | none       |
| P2RY11    | 0.248  | 0.2869  | 1.1301 | 0.28572 | 0.456 | -5.92 | -0.6146 | none       |
| CPEB3     | 0.093  | 0.085   | 1.13   | 0.28575 | 0.456 | -5.92 | -0.6614 | none       |
| DNAJC1    | 0.333  | 0.3895  | 1.1299 | 0.28582 | 0.456 | -5.93 | 0.70979 | none       |
| FOXN2     | -0.204 | -0.1431 | -1.13  | 0.28585 | 0.456 | -5.93 | 2.2156  | AA-related |
| ARPP19    | 0.17   | 0.0781  | 1.1297 | 0.28591 | 0.456 | -5.93 | -0.9672 | none       |
| LCE1E     | -0.187 | -0.1877 | -1.129 | 0.28602 | 0.456 | -5.93 | 0.88699 | none       |
| RNF208    | 0.194  | 0.171   | 1.1293 | 0.28606 | 0.456 | -5.93 | -0.4871 | none       |
| MDP1      | -0.194 | -0.2145 | -1.129 | 0.28609 | 0.456 | -5.93 | 0.64959 | none       |
| VIM       | -0.159 | -0.1423 | -1.129 | 0.28621 | 0.457 | -5.93 | 1.05541 | none       |
| FAM25C    | -0.208 | -0.2083 | -1.129 | 0.28629 | 0.457 | -5.93 | 1.9054  | none       |
| MTMR14    | 0.118  | 0.0499  | 1.1286 | 0.28632 | 0.457 | -5.93 | -0.0935 | none       |
| SEL1L2    | -0.155 | -0.1768 | -1.128 | 0.2864  | 0.457 | -5.93 | 0.69722 | none       |
| RPP25     | 0.1    | 0.1292  | 1.1282 | 0.2865  | 0.457 | -5.93 | 1.13186 | none       |
| SDR9C7    | 0.082  | 0.0824  | 1.128  | 0.28656 | 0.457 | -5.93 | -0.7589 | none       |

|          |        |         |        |         |       |       |         |      |
|----------|--------|---------|--------|---------|-------|-------|---------|------|
| MEAF6    | -0.133 | -0.1621 | -1.128 | 0.2866  | 0.457 | -5.93 | 2.00981 | none |
| TMED9    | -0.132 | -0.0959 | -1.128 | 0.28673 | 0.457 | -5.93 | 1.01031 | none |
| RTKN2    | 0.124  | 0.007   | 1.1276 | 0.28674 | 0.457 | -5.93 | 0.10412 | none |
| CHGA     | 0.126  | 0.15    | 1.1275 | 0.28679 | 0.457 | -5.93 | 0.83816 | none |
| MYO7A    | -0.338 | -0.2935 | -1.127 | 0.28687 | 0.457 | -5.93 | -0.4529 | none |
| ABI3BP   | 0.304  | 0.2629  | 1.1272 | 0.28691 | 0.457 | -5.93 | -0.1567 | none |
| MPP3     | -0.132 | -0.1137 | -1.127 | 0.28696 | 0.457 | -5.93 | 1.57831 | none |
| RALYL    | -0.194 | -0.1947 | -1.127 | 0.287   | 0.457 | -5.93 | -0.1806 | none |
| KCNAB2   | 0.192  | 0.2748  | 1.1269 | 0.28703 | 0.457 | -5.93 | 0.74744 | none |
| DOK5     | 0.17   | 0.045   | 1.1268 | 0.28705 | 0.457 | -5.93 | 0.27963 | none |
| PPP1R7   | 0.195  | 0.2025  | 1.1266 | 0.28715 | 0.457 | -5.93 | -0.8181 | none |
| HLA-DQB1 | 0.134  | 0.0628  | 1.1266 | 0.28715 | 0.457 | -5.93 | 0.32075 | none |
| FAXC     | 0.125  | 0.079   | 1.1265 | 0.28719 | 0.457 | -5.93 | -0.8507 | none |
| AKAP8L   | 0.237  | 0.36    | 1.1262 | 0.28728 | 0.457 | -5.93 | -0.0384 | none |
| LAS1L    | 0.151  | 0.2112  | 1.1261 | 0.28732 | 0.457 | -5.93 | 0.09312 | none |
| PRSS45   | -0.091 | -0.0803 | -1.126 | 0.28753 | 0.458 | -5.93 | 0.34552 | none |
| LTN1     | 0.183  | 0.1771  | 1.1255 | 0.28757 | 0.458 | -5.93 | 1.20516 | none |
| CASP8AP2 | 0.301  | 0.3386  | 1.1252 | 0.2877  | 0.458 | -5.93 | 0.06758 | none |
| TMEM110  | 0.146  | 0.0722  | 1.1251 | 0.28774 | 0.458 | -5.93 | 1.05873 | none |
| XXYLT1   | 0.181  | 0.2173  | 1.1248 | 0.28784 | 0.458 | -5.93 | 0.89108 | none |
| MAGED4   | -0.152 | -0.0393 | -1.125 | 0.28797 | 0.458 | -5.93 | 1.25099 | none |
| MRPS7    | -0.115 | -0.1087 | -1.124 | 0.28804 | 0.458 | -5.93 | 0.10657 | none |
| ORC1     | 0.204  | 0.2411  | 1.1243 | 0.28808 | 0.458 | -5.93 | 0.0836  | none |
| LONRF1   | 0.157  | 0.1208  | 1.1234 | 0.28844 | 0.459 | -5.93 | -0.7947 | none |
| PHIP     | 0.275  | 0.3199  | 1.1226 | 0.28876 | 0.459 | -5.93 | 0.31777 | none |
| ZBED6    | 0.208  | 0.2731  | 1.1223 | 0.28886 | 0.459 | -5.93 | -0.2543 | none |
| AC008622 | 0.21   | 0.2104  | 1.1222 | 0.28892 | 0.46  | -5.93 | 1.19688 | none |
| GNRH2    | 0.108  | 0.1264  | 1.1219 | 0.28903 | 0.46  | -5.93 | 0.09752 | none |
| LGR4     | 0.093  | 0.0545  | 1.1218 | 0.28906 | 0.46  | -5.93 | 1.18659 | none |
| IRF1     | 0.14   | 0.1067  | 1.1214 | 0.28923 | 0.46  | -5.93 | -0.093  | none |
| USP18    | -0.131 | -0.1686 | -1.121 | 0.2893  | 0.46  | -5.93 | 1.04487 | none |
| FUNDC1   | 0.121  | 0.0277  | 1.1209 | 0.28944 | 0.46  | -5.93 | 0.88443 | none |
| SGMS1    | 0.169  | 0.1103  | 1.1205 | 0.28961 | 0.46  | -5.94 | -0.2557 | none |
| FLNA     | 0.361  | 0.5643  | 1.1204 | 0.28966 | 0.46  | -5.94 | -0.0349 | none |
| ERMARD   | 0.283  | 0.2794  | 1.1202 | 0.28972 | 0.46  | -5.94 | -0.2325 | none |
| PRKCI    | 0.157  | 0.1236  | 1.1202 | 0.28974 | 0.46  | -5.94 | 1.24566 | none |
| RLN2     | -0.296 | -0.2856 | -1.12  | 0.28978 | 0.46  | -5.94 | 1.63853 | none |
| IL2      | -0.212 | -0.2432 | -1.12  | 0.28984 | 0.46  | -5.94 | 0.88602 | none |
| OSER1    | 0.076  | -0.0032 | 1.1198 | 0.28986 | 0.46  | -5.94 | -0.2013 | none |
| CCDC96   | 0.111  | 0.1123  | 1.1197 | 0.28991 | 0.46  | -5.94 | 0.20499 | none |

|           |        |         |        |         |       |       |         |      |
|-----------|--------|---------|--------|---------|-------|-------|---------|------|
| CIDEC     | 0.101  | 0.0971  | 1.1197 | 0.28994 | 0.46  | -5.94 | 0.60614 | none |
| SAC3D1    | -0.166 | -0.1672 | -1.12  | 0.28995 | 0.46  | -5.94 | -0.2121 | none |
| TMEM54    | 0.104  | 0.18    | 1.1196 | 0.28996 | 0.46  | -5.94 | 1.11078 | none |
| CAPS2     | -0.163 | -0.171  | -1.12  | 0.28996 | 0.46  | -5.94 | 0.88294 | none |
| IFITM1    | -0.185 | -0.283  | -1.12  | 0.28999 | 0.46  | -5.94 | 0.94325 | none |
| OVOL1     | -0.08  | -0.0516 | -1.119 | 0.29002 | 0.46  | -5.94 | -0.768  | none |
| CTR9      | 0.29   | 0.3419  | 1.1188 | 0.2903  | 0.461 | -5.94 | 0.18128 | none |
| SIM1      | 0.085  | 0.0725  | 1.1187 | 0.29031 | 0.461 | -5.94 | -0.2329 | none |
| DDX5      | 0.153  | 0.1921  | 1.1185 | 0.29039 | 0.461 | -5.94 | 1.32188 | none |
| ARHGEF19  | 0.131  | 0.1353  | 1.1185 | 0.29041 | 0.461 | -5.94 | 0.28923 | none |
| ASMTL     | 0.138  | 0.1288  | 1.1171 | 0.29097 | 0.462 | -5.94 | 0.05406 | none |
| RBM11     | 0.137  | 0.0801  | 1.117  | 0.29101 | 0.462 | -5.94 | 0.19912 | none |
| KCNS3     | -0.133 | -0.1373 | -1.117 | 0.29101 | 0.462 | -5.94 | 0.50269 | none |
| CNBP      | -0.093 | -0.0859 | -1.116 | 0.29123 | 0.462 | -5.94 | 1.07005 | none |
| FAM25G    | -0.19  | -0.1897 | -1.116 | 0.29128 | 0.462 | -5.94 | 0.38565 | none |
| CDC42BPA  | 0.133  | 0.1411  | 1.1162 | 0.29136 | 0.462 | -5.94 | 0.55659 | none |
| SLC8A2    | 0.215  | 0.228   | 1.1159 | 0.29145 | 0.462 | -5.94 | 0.0079  | none |
| MMP28     | 0.088  | 0.085   | 1.1159 | 0.29148 | 0.462 | -5.94 | 0.05739 | none |
| OCM2      | 0.2    | 0.2002  | 1.1154 | 0.29166 | 0.462 | -5.94 | -0.7522 | none |
| HPF1      | -0.118 | -0.1608 | -1.115 | 0.29169 | 0.462 | -5.94 | -0.0523 | none |
| DEFB128   | -0.188 | -0.1881 | -1.115 | 0.29177 | 0.463 | -5.94 | 1.03077 | none |
| CHM       | 0.197  | 0.1876  | 1.115  | 0.29182 | 0.463 | -5.94 | 0.40297 | none |
| ANO4      | -0.122 | -0.0654 | -1.115 | 0.29185 | 0.463 | -5.94 | 1.36794 | none |
| EDDM3B    | 0.081  | 0.0814  | 1.1146 | 0.29199 | 0.463 | -5.94 | -0.7502 | none |
| MDH1B     | -0.113 | -0.0672 | -1.115 | 0.29201 | 0.463 | -5.94 | 0.16016 | none |
| TRAIP     | 0.266  | 0.2681  | 1.1144 | 0.29207 | 0.463 | -5.94 | 0.18733 | none |
| CYCS      | -0.158 | -0.1788 | -1.114 | 0.29207 | 0.463 | -5.94 | 1.81729 | none |
| TMEM26    | -0.102 | -0.1019 | -1.114 | 0.29209 | 0.463 | -5.94 | 1.94783 | none |
| HIST1H2BC | -0.189 | -0.2523 | -1.114 | 0.29212 | 0.463 | -5.94 | 0.55986 | none |
| HIGD1A    | -0.152 | -0.2179 | -1.114 | 0.2922  | 0.463 | -5.94 | 0.79229 | none |
| ADNP2     | 0.089  | 0.0808  | 1.1141 | 0.29221 | 0.463 | -5.94 | 0.67942 | none |
| ZCCHC3    | 0.133  | 0.064   | 1.1141 | 0.29222 | 0.463 | -5.94 | 0.00151 | none |
| SCARA5    | 0.079  | 0.0786  | 1.1139 | 0.29228 | 0.463 | -5.94 | 0.80665 | none |
| ESCO2     | 0.267  | 0.2697  | 1.1138 | 0.29233 | 0.463 | -5.94 | 0.58941 | none |
| HOXB3     | 0.284  | 0.3094  | 1.1136 | 0.29239 | 0.463 | -5.94 | 0.44552 | none |
| RIMKLA    | 0.163  | 0.0778  | 1.1136 | 0.2924  | 0.463 | -5.94 | 0.61047 | none |
| SRPK2     | -0.156 | -0.0856 | -1.113 | 0.29254 | 0.463 | -5.94 | 0.12557 | none |
| MMAA      | -0.334 | -0.2912 | -1.113 | 0.2927  | 0.463 | -5.94 | 1.27436 | none |
| PPP1R10   | 0.556  | 0.5382  | 1.1128 | 0.29272 | 0.463 | -5.94 | 0.46168 | none |
| PALLD     | -0.25  | -0.073  | -1.113 | 0.2928  | 0.463 | -5.94 | 0.12811 | none |

|         |        |         |        |         |       |       |         |      |
|---------|--------|---------|--------|---------|-------|-------|---------|------|
| ZNF48   | 0.168  | 0.2185  | 1.1125 | 0.29283 | 0.463 | -5.94 | 0.44481 | none |
| C2ORF72 | -0.111 | -0.1125 | -1.112 | 0.2931  | 0.464 | -5.94 | 1.58819 | none |
| BMS1    | 0.327  | 0.4751  | 1.1118 | 0.29315 | 0.464 | -5.94 | -0.0188 | none |
| LYL1    | 0.14   | 0.1249  | 1.1114 | 0.29331 | 0.464 | -5.94 | -0.1492 | none |
| NSUN5   | -0.121 | -0.09   | -1.111 | 0.29335 | 0.464 | -5.95 | 1.32223 | none |
| NOA1    | -0.09  | -0.0478 | -1.111 | 0.29342 | 0.464 | -5.95 | 0.82414 | none |
| FAM19A3 | 0.08   | 0.0875  | 1.111  | 0.29349 | 0.464 | -5.95 | -0.355  | none |
| LEMD1   | 0.104  | 0.0997  | 1.1108 | 0.29357 | 0.464 | -5.95 | -0.0738 | none |
| KIF21A  | 0.3    | 0.4631  | 1.1106 | 0.29364 | 0.464 | -5.95 | 0.08296 | none |
| PRKAR2B | 0.082  | 0.0589  | 1.1103 | 0.29376 | 0.464 | -5.95 | -0.4987 | none |
| DNAJA1  | -0.123 | -0.0818 | -1.11  | 0.29395 | 0.465 | -5.95 | 1.42125 | none |
| DYNC1I2 | -0.136 | -0.1023 | -1.11  | 0.29405 | 0.465 | -5.95 | 1.35964 | none |
| OR8D1   | -0.086 | -0.0477 | -1.11  | 0.29408 | 0.465 | -5.95 | 0.22522 | none |
| TAC1    | 0.096  | 0.1282  | 1.1095 | 0.29409 | 0.465 | -5.95 | 0.11709 | none |
| EEF1D   | -0.136 | -0.0928 | -1.109 | 0.29411 | 0.465 | -5.95 | 0.95845 | none |
| ZNF232  | 0.149  | 0.1496  | 1.1094 | 0.29412 | 0.465 | -5.95 | -0.143  | none |
| LTC4S   | -0.113 | -0.1196 | -1.109 | 0.29424 | 0.465 | -5.95 | 0.23576 | none |
| DCP1B   | 0.165  | 0.1544  | 1.1089 | 0.29432 | 0.465 | -5.95 | 0.89724 | none |
| IGSF10  | 0.114  | 0.1144  | 1.1089 | 0.29434 | 0.465 | -5.95 | 1.42493 | none |
| MRPL36  | -0.137 | -0.1381 | -1.109 | 0.29434 | 0.465 | -5.95 | 1.00354 | none |
| SPINK2  | 0.232  | 0.161   | 1.1087 | 0.29439 | 0.465 | -5.95 | 0.70457 | none |
| PDHA1   | 0.094  | 0.1254  | 1.1082 | 0.29461 | 0.465 | -5.95 | 1.0324  | none |
| LBR     | 0.138  | 0.0567  | 1.1082 | 0.29463 | 0.465 | -5.95 | 0.94694 | none |
| PIP4K2B | 0.179  | 0.1832  | 1.1077 | 0.29482 | 0.466 | -5.95 | -0.201  | none |
| FAM83H  | 0.221  | 0.1442  | 1.1075 | 0.29491 | 0.466 | -5.95 | -0.8581 | none |
| FAS     | 0.112  | 0.0567  | 1.1073 | 0.29498 | 0.466 | -5.95 | 0.37022 | none |
| MKKS    | -0.152 | -0.1329 | -1.107 | 0.2952  | 0.466 | -5.95 | 1.18528 | none |
| ALOX5   | -0.084 | -0.0947 | -1.106 | 0.29535 | 0.466 | -5.95 | -0.0359 | none |
| ZNF436  | 0.085  | 0.0961  | 1.1059 | 0.29554 | 0.466 | -5.95 | -0.3281 | none |
| SLC2A9  | 0.179  | 0.2726  | 1.1059 | 0.29555 | 0.466 | -5.95 | 0.82954 | none |
| RAET1L  | 0.102  | 0.1016  | 1.1059 | 0.29558 | 0.466 | -5.95 | -0.2435 | none |
| C7ORF31 | -0.154 | -0.1006 | -1.106 | 0.29559 | 0.466 | -5.95 | 1.29966 | none |
| EFNA1   | 0.157  | 0.1473  | 1.1051 | 0.29588 | 0.467 | -5.95 | 0.03763 | none |
| SPANXN2 | -0.1   | -0.0927 | -1.105 | 0.29605 | 0.467 | -5.95 | 1.00702 | none |
| TMEM42  | 0.181  | 0.1256  | 1.1047 | 0.29607 | 0.467 | -5.95 | 1.14656 | none |
| RWDD4   | -0.133 | -0.0916 | -1.105 | 0.29608 | 0.467 | -5.95 | 0.27365 | none |
| PEG10   | -0.095 | -0.0648 | -1.104 | 0.29618 | 0.467 | -5.95 | 1.50828 | none |
| B4GAT1  | -0.161 | -0.1117 | -1.104 | 0.29638 | 0.467 | -5.95 | 1.72701 | none |
| KTI12   | 0.116  | 0.0772  | 1.1039 | 0.29638 | 0.467 | -5.95 | -0.4158 | none |
| SLC38A9 | -0.244 | -0.2348 | -1.104 | 0.29639 | 0.467 | -5.95 | 1.04754 | none |

|           |        |         |        |         |       |       |         |      |
|-----------|--------|---------|--------|---------|-------|-------|---------|------|
| PRR15L    | 0.081  | 0.0831  | 1.1039 | 0.29639 | 0.467 | -5.95 | -0.3156 | none |
| AIFM3     | -0.09  | -0.0252 | -1.104 | 0.29642 | 0.467 | -5.95 | 0.58156 | none |
| KLHDC9    | -0.208 | -0.2018 | -1.104 | 0.29644 | 0.467 | -5.95 | 0.76012 | none |
| GALM      | 0.151  | 0.1384  | 1.1036 | 0.29652 | 0.467 | -5.95 | -0.7363 | none |
| SREK1IP1  | 0.2    | 0.1252  | 1.1035 | 0.29654 | 0.467 | -5.95 | 0.27296 | none |
| CNOT7     | -0.146 | -0.1613 | -1.104 | 0.29655 | 0.467 | -5.95 | 1.98457 | none |
| GNAS      | 0.3    | 0.4004  | 1.1034 | 0.29659 | 0.467 | -5.95 | -0.6888 | none |
| APOBEC4   | 0.107  | 0.1072  | 1.1029 | 0.29678 | 0.468 | -5.95 | 0.68084 | none |
| FOXL2     | 0.082  | 0.0557  | 1.1026 | 0.29691 | 0.468 | -5.95 | -1.215  | none |
| AC110602  | -0.198 | -0.1134 | -1.102 | 0.29697 | 0.468 | -5.95 | 1.44705 | none |
| GPCPD1    | 0.27   | 0.2536  | 1.1025 | 0.29698 | 0.468 | -5.95 | -0.6468 | none |
| PROB1     | 0.173  | 0.2227  | 1.1024 | 0.29702 | 0.468 | -5.95 | -0.653  | none |
| TBC1D3I   | -0.193 | -0.1878 | -1.102 | 0.29702 | 0.468 | -5.95 | 0.51185 | none |
| THAP2     | 0.174  | 0.1306  | 1.1024 | 0.29702 | 0.468 | -5.95 | 1.27073 | none |
| CDC25B    | 0.136  | 0.0982  | 1.1023 | 0.29704 | 0.468 | -5.95 | -0.6496 | none |
| GSG1L     | 0.09   | 0.043   | 1.102  | 0.29716 | 0.468 | -5.95 | -0.6895 | none |
| MRPL57    | 0.152  | 0.0759  | 1.1017 | 0.29731 | 0.468 | -5.96 | -0.5118 | none |
| USP50     | -0.085 | -0.051  | -1.102 | 0.29731 | 0.468 | -5.96 | -0.4621 | none |
| NCDN      | 0.131  | 0.2117  | 1.1017 | 0.29731 | 0.468 | -5.96 | 0.79097 | none |
| SYF2      | 0.135  | 0.1054  | 1.1014 | 0.2974  | 0.468 | -5.96 | -0.8216 | none |
| ZNF484    | 0.156  | 0.1652  | 1.1011 | 0.29756 | 0.468 | -5.96 | -0.7463 | none |
| MMD2      | 0.137  | 0.1367  | 1.101  | 0.29759 | 0.468 | -5.96 | 0.91134 | none |
| KIAA1217  | 0.114  | 0.1205  | 1.101  | 0.29761 | 0.468 | -5.96 | 1.26087 | none |
| ROM1      | 0.46   | 0.3253  | 1.1007 | 0.2977  | 0.468 | -5.96 | -0.7027 | none |
| TNR       | 0.079  | 0.0503  | 1.1003 | 0.29787 | 0.469 | -5.96 | 0       | none |
| OR8S1     | -0.079 | -0.0775 | -1.1   | 0.29791 | 0.469 | -5.96 | -0.1107 | none |
| MSANTD2   | -0.108 | -0.1195 | -1.1   | 0.29794 | 0.469 | -5.96 | 1.59791 | none |
| UBE2M     | -0.158 | -0.1215 | -1.1   | 0.29813 | 0.469 | -5.96 | 1.0626  | none |
| ZNF705A   | -0.128 | -0.1399 | -1.1   | 0.29819 | 0.469 | -5.96 | 1.48163 | none |
| TIMM10B   | 0.09   | 0.0341  | 1.0995 | 0.29823 | 0.469 | -5.96 | -0.0553 | none |
| NOL12     | 0.127  | 0.1597  | 1.0992 | 0.29835 | 0.469 | -5.96 | -0.0688 | none |
| CAMSAP2   | 0.187  | 0.248   | 1.099  | 0.29842 | 0.469 | -5.96 | -0.4662 | none |
| DCD       | 0.207  | 0.1059  | 1.0989 | 0.29845 | 0.469 | -5.96 | -0.6041 | none |
| PHLDA3    | 0.182  | 0.1623  | 1.0988 | 0.29851 | 0.469 | -5.96 | -0.552  | none |
| AL356585. | -0.08  | -0.0757 | -1.099 | 0.2986  | 0.469 | -5.96 | 1.61434 | none |
| HSP90AB1  | -0.14  | -0.0342 | -1.099 | 0.29861 | 0.469 | -5.96 | 1.78357 | none |
| ACTL8     | -0.083 | -0.0962 | -1.098 | 0.29869 | 0.469 | -5.96 | 1.42652 | none |
| FZD7      | 0.073  | 0.0387  | 1.0982 | 0.29874 | 0.469 | -5.96 | -0.8559 | none |
| LIPF      | -0.169 | -0.169  | -1.098 | 0.29875 | 0.469 | -5.96 | 0.82838 | none |
| DUSP15    | -0.114 | -0.0948 | -1.098 | 0.29875 | 0.469 | -5.96 | 0.87388 | none |



|           |        |         |        |         |       |       |         |            |
|-----------|--------|---------|--------|---------|-------|-------|---------|------------|
| NECAB2    | -0.157 | -0.133  | -1.098 | 0.29879 | 0.469 | -5.96 | 0.47239 | none       |
| FAM214B   | 0.106  | 0.0966  | 1.0978 | 0.29893 | 0.469 | -5.96 | -0.0648 | none       |
| CKMT1B    | 0.112  | 0.111   | 1.0978 | 0.29893 | 0.469 | -5.96 | -0.0328 | none       |
| C1QTNF3-  | 0.094  | 0.0636  | 1.0977 | 0.29894 | 0.469 | -5.96 | 0.18261 | none       |
| RBM33     | 0.171  | 0.2535  | 1.0977 | 0.29895 | 0.469 | -5.96 | 0.77978 | none       |
| TECPR2    | 0.195  | 0.2431  | 1.0976 | 0.29898 | 0.469 | -5.96 | 0.6444  | none       |
| CCDC149   | 0.16   | 0.0955  | 1.0976 | 0.29898 | 0.469 | -5.96 | -0.8416 | none       |
| P2RY8     | 0.211  | 0.2342  | 1.0975 | 0.29904 | 0.469 | -5.96 | 0.18081 | none       |
| BBS5      | 0.232  | 0.2739  | 1.0974 | 0.29909 | 0.469 | -5.96 | -0.0262 | none       |
| HLA-DRB5  | -0.104 | -0.0894 | -1.097 | 0.29913 | 0.469 | -5.96 | 1.07978 | none       |
| FAM168B   | 0.102  | 0.117   | 1.0971 | 0.2992  | 0.469 | -5.96 | 0.52782 | none       |
| C5ORF67   | 0.131  | 0.1354  | 1.0971 | 0.29921 | 0.469 | -5.96 | -0.0563 | none       |
| COL21A1   | -0.08  | -0.0533 | -1.097 | 0.29929 | 0.469 | -5.96 | -0.2506 | none       |
| IDI2      | -0.084 | -0.0446 | -1.097 | 0.2993  | 0.469 | -5.96 | 2.09167 | AA-related |
| DGKG      | -0.238 | -0.194  | -1.097 | 0.29931 | 0.469 | -5.96 | 1.44392 | none       |
| ARFGAP1   | 0.134  | 0.1715  | 1.0967 | 0.29937 | 0.47  | -5.96 | 0.9951  | none       |
| PDGFRA    | 0.317  | 0.3476  | 1.0967 | 0.29938 | 0.47  | -5.96 | -0.0261 | none       |
| WDR77     | -0.149 | -0.1275 | -1.097 | 0.29945 | 0.47  | -5.96 | 1.85127 | none       |
| BPIFB4    | -0.101 | -0.1013 | -1.096 | 0.29946 | 0.47  | -5.96 | 1.76804 | none       |
| SH2D5     | -0.104 | -0.0961 | -1.096 | 0.2996  | 0.47  | -5.96 | 0.33608 | none       |
| CNFN      | -0.085 | -0.0629 | -1.096 | 0.29965 | 0.47  | -5.96 | 0.53257 | none       |
| SPINT4    | 0.177  | 0.1765  | 1.096  | 0.29967 | 0.47  | -5.96 | 1.19688 | none       |
| IMPACT    | 0.118  | 0.0688  | 1.0959 | 0.29971 | 0.47  | -5.96 | -0.2846 | none       |
| DDX52     | 0.215  | 0.1882  | 1.0957 | 0.29979 | 0.47  | -5.96 | 0.25178 | none       |
| SENP3-EIF | 0.16   | 0.2053  | 1.0954 | 0.29991 | 0.47  | -5.96 | 0.18584 | none       |
| EPS8L3    | -0.114 | -0.1082 | -1.095 | 0.29995 | 0.47  | -5.96 | -0.3991 | none       |
| NLRP3     | 0.13   | 0.0989  | 1.0953 | 0.29996 | 0.47  | -5.96 | 0.81164 | none       |
| DHX36     | 0.243  | 0.2538  | 1.0951 | 0.30003 | 0.47  | -5.96 | -0.074  | none       |
| EGR2      | 0.128  | 0.2002  | 1.095  | 0.3001  | 0.47  | -5.96 | 0.38029 | none       |
| SEMA3G    | 0.139  | 0.1329  | 1.0947 | 0.30021 | 0.47  | -5.96 | -1.177  | none       |
| PTPRC     | 0.289  | 0.359   | 1.0944 | 0.30033 | 0.47  | -5.96 | 0.31892 | none       |
| RAB41     | -0.149 | -0.1082 | -1.094 | 0.30038 | 0.47  | -5.96 | 1.38746 | none       |
| HEXB      | -0.154 | -0.198  | -1.094 | 0.30046 | 0.471 | -5.96 | 2.0378  | none       |
| ZBED4     | 0.159  | 0.2258  | 1.0938 | 0.30057 | 0.471 | -5.96 | -0.5732 | none       |
| SCML2     | 0.235  | 0.1787  | 1.0936 | 0.30066 | 0.471 | -5.96 | -0.9295 | none       |
| ANXA10    | 0.099  | 0.1081  | 1.0929 | 0.30094 | 0.471 | -5.96 | 0.84925 | none       |
| RAD51D    | 0.157  | 0.1363  | 1.0928 | 0.301   | 0.471 | -5.96 | -0.6458 | none       |
| CAPNS1    | 0.157  | 0.1119  | 1.0926 | 0.30108 | 0.471 | -5.96 | -0.8047 | none       |
| FGFBP2    | 0.11   | 0.1119  | 1.0926 | 0.3011  | 0.471 | -5.96 | 1.14804 | none       |
| SCAND1    | -0.17  | -0.2195 | -1.092 | 0.30118 | 0.471 | -5.97 | 1.56751 | none       |

|            |        |         |        |         |       |       |         |      |
|------------|--------|---------|--------|---------|-------|-------|---------|------|
| WDCP       | -0.173 | -0.1286 | -1.092 | 0.30132 | 0.471 | -5.97 | 0.31273 | none |
| TRMT10A    | -0.209 | -0.205  | -1.092 | 0.30153 | 0.472 | -5.97 | 0.17476 | none |
| LACC1      | 0.136  | 0.1581  | 1.0915 | 0.30153 | 0.472 | -5.97 | 0.00761 | none |
| MMP13      | 0.09   | 0.0657  | 1.0913 | 0.30161 | 0.472 | -5.97 | -0.6001 | none |
| HSDL1      | 0.133  | 0.0409  | 1.091  | 0.30177 | 0.472 | -5.97 | 0.5869  | none |
| IL18R1     | 0.202  | 0.2424  | 1.0909 | 0.30178 | 0.472 | -5.97 | 0.18526 | none |
| FNDC1      | -0.079 | -0.0839 | -1.091 | 0.30184 | 0.472 | -5.97 | -0.0473 | none |
| ANKRD20A   | 0.164  | 0.1278  | 1.0908 | 0.30185 | 0.472 | -5.97 | 0.64284 | none |
| MFN2       | 0.135  | 0.2032  | 1.0907 | 0.30187 | 0.472 | -5.97 | 0.61451 | none |
| CD274      | -0.169 | -0.1726 | -1.091 | 0.30189 | 0.472 | -5.97 | 0.56538 | none |
| CPB1       | 0.783  | 0.7166  | 1.0902 | 0.30209 | 0.472 | -5.97 | -0.2537 | none |
| VKORC1     | -0.179 | -0.2094 | -1.09  | 0.30219 | 0.472 | -5.97 | 0.88039 | none |
| PMCH       | -0.138 | -0.1998 | -1.09  | 0.30235 | 0.473 | -5.97 | 0.71898 | none |
| EBAG9      | -0.102 | -0.123  | -1.09  | 0.30235 | 0.473 | -5.97 | 1.71014 | none |
| NXT2       | -0.171 | -0.2216 | -1.089 | 0.30259 | 0.473 | -5.97 | 1.20103 | none |
| COPZ2      | -0.204 | -0.1959 | -1.089 | 0.30264 | 0.473 | -5.97 | 0.17845 | none |
| TASP1      | -0.111 | -0.0986 | -1.089 | 0.30266 | 0.473 | -5.97 | -0.3773 | none |
| ACY3       | -0.095 | -0.085  | -1.089 | 0.30276 | 0.473 | -5.97 | 0.57399 | none |
| USP13      | 0.196  | 0.2213  | 1.0879 | 0.30304 | 0.473 | -5.97 | 0.6019  | none |
| OLFML3     | 0.087  | 0.076   | 1.0875 | 0.30322 | 0.474 | -5.97 | -0.9506 | none |
| ENPP4      | 0.168  | 0.104   | 1.0871 | 0.30339 | 0.474 | -5.97 | -0.1898 | none |
| CLN8       | 0.17   | 0.1265  | 1.087  | 0.30344 | 0.474 | -5.97 | 0.99749 | none |
| ART5       | -0.089 | -0.08   | -1.087 | 0.30356 | 0.474 | -5.97 | -0.5832 | none |
| TBL3       | 0.122  | 0.1728  | 1.0867 | 0.30357 | 0.474 | -5.97 | 0.38247 | none |
| DEFB115    | 0.167  | 0.1673  | 1.0865 | 0.30364 | 0.474 | -5.97 | 0.44852 | none |
| MYNN       | 0.127  | 0.0854  | 1.0864 | 0.30368 | 0.474 | -5.97 | -0.3699 | none |
| ZNF559-ZNF | 0.243  | 0.2188  | 1.0862 | 0.30378 | 0.474 | -5.97 | 1.55737 | none |
| KHDRBS1    | 0.144  | 0.187   | 1.0858 | 0.30393 | 0.474 | -5.97 | 0.28446 | none |
| PQLC2L     | -0.078 | -0.0782 | -1.086 | 0.30402 | 0.474 | -5.97 | -0.3985 | none |
| HNRNPLL    | -0.1   | -0.0766 | -1.085 | 0.3041  | 0.475 | -5.97 | 1.17516 | none |
| KLHL18     | 0.14   | 0.1682  | 1.0853 | 0.30415 | 0.475 | -5.97 | 0.53656 | none |
| CDC14A     | 0.167  | 0.1696  | 1.0852 | 0.30417 | 0.475 | -5.97 | 0.66136 | none |
| HDAC7      | 0.181  | 0.2674  | 1.0852 | 0.30418 | 0.475 | -5.97 | -0.3565 | none |
| LIPA       | 0.1    | -0.0035 | 1.0848 | 0.30436 | 0.475 | -5.97 | -0.4962 | none |
| SAP25      | 0.272  | 0.2493  | 1.0846 | 0.30445 | 0.475 | -5.97 | -0.4762 | none |
| PNLIP      | 0.085  | 0.0848  | 1.0845 | 0.30447 | 0.475 | -5.97 | 1.28988 | none |
| VPREB3     | -0.097 | -0.086  | -1.084 | 0.30454 | 0.475 | -5.97 | 0.67267 | none |
| GPBAR1     | 0.086  | 0.0766  | 1.0842 | 0.30461 | 0.475 | -5.97 | -0.5706 | none |
| CCSER1     | 0.175  | 0.1784  | 1.0839 | 0.30474 | 0.475 | -5.97 | -0.4746 | none |
| PODXL2     | 0.117  | 0.1265  | 1.0835 | 0.30489 | 0.475 | -5.97 | 0.91244 | none |

|          |        |         |        |         |       |       |         |      |
|----------|--------|---------|--------|---------|-------|-------|---------|------|
| OR5M3    | -0.077 | -0.0528 | -1.083 | 0.30513 | 0.476 | -5.97 | 1.75388 | none |
| 5-Sep    | -0.251 | -0.0778 | -1.083 | 0.30518 | 0.476 | -5.97 | 0.00795 | none |
| ZNF28    | 0.194  | 0.1003  | 1.0826 | 0.3053  | 0.476 | -5.98 | 0.88794 | none |
| MZT1     | -0.206 | -0.2588 | -1.083 | 0.3053  | 0.476 | -5.98 | 1.25297 | none |
| C20ORF27 | -0.146 | -0.1391 | -1.082 | 0.30534 | 0.476 | -5.98 | 1.80044 | none |
| C8B      | 0.164  | 0.1636  | 1.0823 | 0.3054  | 0.476 | -5.98 | 1.02049 | none |
| TCF19    | -0.347 | -0.2095 | -1.082 | 0.30545 | 0.476 | -5.98 | 1.63335 | none |
| AP3D1    | 0.347  | 0.5407  | 1.082  | 0.30552 | 0.476 | -5.98 | -0.2789 | none |
| MFAP3L   | 0.154  | 0.1689  | 1.0806 | 0.30613 | 0.477 | -5.98 | 0.37969 | none |
| GALNT12  | -0.149 | -0.1658 | -1.08  | 0.30632 | 0.477 | -5.98 | 0.64095 | none |
| AGR2     | 0.13   | 0.078   | 1.08   | 0.3064  | 0.477 | -5.98 | 0.42263 | none |
| ASPDH    | -0.136 | -0.0901 | -1.08  | 0.30642 | 0.477 | -5.98 | 0.24702 | none |
| TMEM56-I | -0.088 | -0.0097 | -1.08  | 0.30647 | 0.477 | -5.98 | -0.0445 | none |
| MEMO1    | -0.122 | -0.1506 | -1.08  | 0.30648 | 0.477 | -5.98 | 1.46397 | none |
| KRTDAP   | -0.153 | -0.153  | -1.08  | 0.30656 | 0.477 | -5.98 | 0.21342 | none |
| PCDHGC4  | -0.098 | -0.1018 | -1.079 | 0.3067  | 0.477 | -5.98 | 1.73467 | none |
| C1ORF43  | -0.146 | -0.2149 | -1.079 | 0.30674 | 0.477 | -5.98 | 1.38779 | none |
| HMBS     | -0.155 | -0.1403 | -1.079 | 0.30686 | 0.478 | -5.98 | 1.64107 | none |
| ACP1     | -0.123 | -0.1439 | -1.079 | 0.30698 | 0.478 | -5.98 | 0.09469 | none |
| PLAC8L1  | 0.166  | 0.1009  | 1.0785 | 0.30702 | 0.478 | -5.98 | 0.56752 | none |
| ISL1     | 0.077  | 0.0787  | 1.0783 | 0.3071  | 0.478 | -5.98 | -0.8379 | none |
| CEBPZ    | 0.274  | 0.3322  | 1.0782 | 0.30716 | 0.478 | -5.98 | 0.17166 | none |
| C1ORF146 | -0.189 | -0.1692 | -1.078 | 0.30717 | 0.478 | -5.98 | 0.64183 | none |
| TRAM1    | -0.154 | -0.2124 | -1.078 | 0.30732 | 0.478 | -5.98 | 1.48442 | none |
| AKAP17A  | 0.297  | 0.4461  | 1.0776 | 0.3074  | 0.478 | -5.98 | 0.51255 | none |
| CC2D2B   | 0.301  | 0.2655  | 1.0774 | 0.30748 | 0.478 | -5.98 | 0.60171 | none |
| EIF4B    | 0.189  | 0.235   | 1.0773 | 0.30754 | 0.478 | -5.98 | -0.0362 | none |
| ONECUT2  | 0.11   | 0.1058  | 1.0772 | 0.30755 | 0.478 | -5.98 | 0.58568 | none |
| MIB1     | 0.134  | 0.1355  | 1.0771 | 0.30759 | 0.478 | -5.98 | 0.0097  | none |
| ARL13B   | 0.247  | 0.2425  | 1.077  | 0.30763 | 0.478 | -5.98 | 0.51965 | none |
| FAM220A  | 0.367  | 0.2554  | 1.0769 | 0.30772 | 0.478 | -5.98 | 0.37774 | none |
| TBPL2    | 0.199  | 0.15    | 1.0768 | 0.30775 | 0.478 | -5.98 | -0.6727 | none |
| SALL1    | -0.112 | -0.1066 | -1.077 | 0.30777 | 0.478 | -5.98 | 1.03887 | none |
| DNAJB9   | -0.174 | -0.2073 | -1.077 | 0.30782 | 0.478 | -5.98 | 1.08886 | none |
| COX17    | -0.18  | -0.2009 | -1.076 | 0.30796 | 0.479 | -5.98 | 0.35642 | none |
| 1-Mar    | 0.189  | 0.1125  | 1.0759 | 0.3081  | 0.479 | -5.98 | -0.6713 | none |
| AHCTF1   | 0.494  | 0.5556  | 1.0758 | 0.30818 | 0.479 | -5.98 | -0.5756 | none |
| ZNF688   | 0.162  | 0.1118  | 1.0756 | 0.30824 | 0.479 | -5.98 | -0.0829 | none |
| CMAS     | -0.099 | -0.0594 | -1.076 | 0.30825 | 0.479 | -5.98 | 1.22498 | none |
| COL23A1  | -0.081 | -0.0542 | -1.075 | 0.30831 | 0.479 | -5.98 | 1.99598 | none |

|          |        |         |        |         |       |       |         |            |
|----------|--------|---------|--------|---------|-------|-------|---------|------------|
| AP1B1    | 0.232  | 0.3296  | 1.0754 | 0.30834 | 0.479 | -5.98 | 0.56094 | none       |
| TSPY2    | 0.158  | 0.1578  | 1.0752 | 0.3084  | 0.479 | -5.98 | -0.2399 | none       |
| FAM71E1  | -0.125 | -0.1166 | -1.075 | 0.30851 | 0.479 | -5.98 | 1.70359 | none       |
| LILRB2   | 0.119  | 0.1231  | 1.0747 | 0.30864 | 0.479 | -5.98 | 0.59894 | none       |
| CARHSP1  | 0.184  | 0.083   | 1.074  | 0.30892 | 0.48  | -5.98 | -0.482  | none       |
| GPR33    | 0.081  | 0.0806  | 1.074  | 0.30894 | 0.48  | -5.98 | 1.07626 | none       |
| ZNF513   | 0.185  | 0.1654  | 1.0739 | 0.30897 | 0.48  | -5.98 | -0.2325 | none       |
| USP17L4  | 0.079  | 0.0527  | 1.0736 | 0.30909 | 0.48  | -5.98 | 0.10877 | none       |
| CLSTN1   | 0.294  | 0.4187  | 1.0735 | 0.30914 | 0.48  | -5.98 | -0.3251 | none       |
| XRCC6    | -0.116 | -0.0423 | -1.073 | 0.30924 | 0.48  | -5.98 | 1.53386 | none       |
| GTF3C5   | 0.132  | 0.1464  | 1.0732 | 0.30926 | 0.48  | -5.98 | 1.18921 | none       |
| KDM4A    | 0.261  | 0.3308  | 1.0732 | 0.30928 | 0.48  | -5.99 | -0.3384 | none       |
| ITIH3    | -0.207 | -0.1754 | -1.073 | 0.30931 | 0.48  | -5.99 | 0.62808 | none       |
| RFPL3    | -0.103 | -0.0876 | -1.073 | 0.30932 | 0.48  | -5.99 | 0.4433  | none       |
| BCAP29   | 0.104  | 0.0389  | 1.0727 | 0.30949 | 0.48  | -5.99 | 0.16221 | none       |
| YPEL4    | 0.084  | 0.0862  | 1.0727 | 0.3095  | 0.48  | -5.99 | 0.2166  | none       |
| IFRD2    | -0.119 | -0.0743 | -1.073 | 0.3095  | 0.48  | -5.99 | 2.02546 | none       |
| AC136616 | 0.156  | 0.1556  | 1.0725 | 0.30958 | 0.48  | -5.99 | 1.4938  | none       |
| CD244    | -0.116 | -0.1345 | -1.072 | 0.30973 | 0.48  | -5.99 | 1.11964 | none       |
| CCRL2    | -0.14  | -0.1488 | -1.072 | 0.30978 | 0.48  | -5.99 | 0.22462 | none       |
| KIF18A   | 0.305  | 0.3623  | 1.0719 | 0.30981 | 0.48  | -5.99 | -0.1735 | none       |
| CCR1     | -0.104 | -0.1457 | -1.072 | 0.30989 | 0.48  | -5.99 | 0.14924 | none       |
| FMO4     | -0.211 | -0.1297 | -1.072 | 0.3099  | 0.48  | -5.99 | 0.82041 | none       |
| ZNF721   | 0.214  | 0.1876  | 1.0717 | 0.30991 | 0.48  | -5.99 | 0.09288 | none       |
| ENO4     | 0.077  | 0.0551  | 1.0714 | 0.31005 | 0.48  | -5.99 | 0.71267 | none       |
| DEFB106A | 0.155  | 0.1548  | 1.0714 | 0.31005 | 0.48  | -5.99 | 0.44852 | none       |
| SPANXB1  | 0.155  | 0.1547  | 1.0712 | 0.31012 | 0.481 | -5.99 | 0.66005 | none       |
| DCLK3    | 0.137  | 0.1365  | 1.0706 | 0.31038 | 0.481 | -5.99 | 1.22583 | none       |
| ZNF416   | -0.114 | -0.1039 | -1.07  | 0.31064 | 0.481 | -5.99 | 2.12563 | AA-related |
| NBPF6    | 0.116  | 0.0743  | 1.0697 | 0.31078 | 0.481 | -5.99 | -0.0169 | none       |
| EDARADD  | 0.216  | 0.21    | 1.0694 | 0.31089 | 0.482 | -5.99 | -0.5762 | none       |
| CYP2E1   | 0.14   | 0.0944  | 1.0694 | 0.31091 | 0.482 | -5.99 | -0.4791 | none       |
| GPRC5D   | 0.299  | 0.2035  | 1.0693 | 0.31094 | 0.482 | -5.99 | -0.9537 | none       |
| PTF1A    | 0.153  | 0.1532  | 1.0692 | 0.31096 | 0.482 | -5.99 | 1.19688 | none       |
| SF3B2    | 0.233  | 0.3695  | 1.0691 | 0.31104 | 0.482 | -5.99 | -0.1476 | none       |
| FAM160A  | 0.136  | 0.1629  | 1.069  | 0.31107 | 0.482 | -5.99 | -0.1004 | none       |
| GSX2     | -0.145 | -0.1454 | -1.069 | 0.31109 | 0.482 | -5.99 | 0.57507 | none       |
| GTF2A1L  | 0.153  | 0.1528  | 1.0687 | 0.31118 | 0.482 | -5.99 | 0.87018 | none       |
| CKAP2    | 0.341  | 0.4197  | 1.0683 | 0.31138 | 0.482 | -5.99 | 0.20086 | none       |
| AKR7A2   | -0.149 | -0.1613 | -1.068 | 0.31147 | 0.482 | -5.99 | 1.43261 | none       |

|          |        |         |        |         |       |       |         |      |
|----------|--------|---------|--------|---------|-------|-------|---------|------|
| MFSD3    | 0.116  | 0.089   | 1.0679 | 0.31152 | 0.482 | -5.99 | 0.99589 | none |
| PPL      | -0.212 | -0.1373 | -1.068 | 0.31156 | 0.482 | -5.99 | 0.98531 | none |
| RRM1     | 0.163  | 0.1668  | 1.0676 | 0.31165 | 0.482 | -5.99 | 0.18335 | none |
| CYP2D6   | 0.126  | 0.0966  | 1.0673 | 0.31178 | 0.482 | -5.99 | 0.15169 | none |
| TPST2    | -0.095 | -0.1148 | -1.067 | 0.31195 | 0.483 | -5.99 | 1.95643 | none |
| LRRC17   | 0.078  | 0.0896  | 1.0669 | 0.31196 | 0.483 | -5.99 | 1.91741 | none |
| RBCK1    | 0.094  | 0.0749  | 1.0666 | 0.31208 | 0.483 | -5.99 | -0.6169 | none |
| CCDC103  | 0.203  | 0.149   | 1.0666 | 0.31209 | 0.483 | -5.99 | -0.3341 | none |
| SMG9     | 0.175  | 0.3031  | 1.0665 | 0.31215 | 0.483 | -5.99 | -0.394  | none |
| SLC16A5  | 0.405  | 0.3396  | 1.0664 | 0.31217 | 0.483 | -5.99 | -0.74   | none |
| HIST1H2B | -0.143 | -0.1434 | -1.066 | 0.31242 | 0.483 | -5.99 | 1.9054  | none |
| FAM111A  | 0.246  | 0.2629  | 1.0658 | 0.31244 | 0.483 | -5.99 | 0.33192 | none |
| ANKMY2   | -0.172 | -0.0696 | -1.066 | 0.31246 | 0.483 | -5.99 | 1.72633 | none |
| BGLAP    | -0.267 | -0.1541 | -1.065 | 0.31263 | 0.483 | -5.99 | 0.98708 | none |
| CCDC63   | -0.123 | -0.1112 | -1.064 | 0.31305 | 0.484 | -5.99 | -0.2931 | none |
| PLGRKT   | -0.16  | -0.2145 | -1.064 | 0.31312 | 0.484 | -5.99 | 0.92525 | none |
| GOLGA8M  | -0.142 | -0.1418 | -1.063 | 0.31348 | 0.484 | -6    | 1.9054  | none |
| CCDC78   | 0.117  | 0.1277  | 1.0633 | 0.31353 | 0.484 | -6    | 0.49487 | none |
| TIPARP   | -0.163 | -0.1728 | -1.063 | 0.31359 | 0.484 | -6    | 2.01804 | none |
| SYCE3    | -0.17  | -0.1039 | -1.063 | 0.31372 | 0.485 | -6    | 0.56238 | none |
| TNNI3K   | 0.139  | 0.1403  | 1.0625 | 0.31388 | 0.485 | -6    | -0.7364 | none |
| PSG7     | -0.166 | -0.0849 | -1.062 | 0.31391 | 0.485 | -6    | 0.1833  | none |
| LENG8    | -0.353 | -0.0805 | -1.062 | 0.31397 | 0.485 | -6    | 1.22896 | none |
| FAIM     | 0.14   | 0.0543  | 1.0622 | 0.31401 | 0.485 | -6    | 0.77318 | none |
| SCML1    | -0.19  | -0.1734 | -1.062 | 0.31413 | 0.485 | -6    | 0.89019 | none |
| TTC39A   | 0.213  | 0.1198  | 1.0618 | 0.31417 | 0.485 | -6    | -0.1308 | none |
| PVRIG    | -0.111 | -0.1238 | -1.062 | 0.31424 | 0.485 | -6    | 0.7644  | none |
| MYH6     | -0.072 | -0.0671 | -1.062 | 0.31427 | 0.485 | -6    | 1.22307 | none |
| CDC14B   | 0.235  | 0.1407  | 1.0612 | 0.31442 | 0.485 | -6    | -0.3818 | none |
| TGFB2    | 0.13   | 0.1335  | 1.0608 | 0.31458 | 0.486 | -6    | 0.1498  | none |
| SIRPD    | -0.088 | -0.0533 | -1.061 | 0.31465 | 0.486 | -6    | -0.2604 | none |
| ULBP2    | 0.172  | 0.1378  | 1.0606 | 0.31466 | 0.486 | -6    | 0.1682  | none |
| TSC22D4  | -0.09  | 0.0089  | -1.06  | 0.31476 | 0.486 | -6    | 1.10669 | none |
| GPC3     | -0.132 | -0.166  | -1.06  | 0.31481 | 0.486 | -6    | 0.79609 | none |
| WARS2    | -0.147 | -0.1066 | -1.06  | 0.31488 | 0.486 | -6    | 1.58239 | none |
| AQP4     | 0.147  | 0.1468  | 1.06   | 0.31492 | 0.486 | -6    | -0.3407 | none |
| TRIB2    | 0.145  | 0.0311  | 1.0599 | 0.31497 | 0.486 | -6    | -0.9286 | none |
| GPX6     | 0.11   | 0.1205  | 1.0599 | 0.315   | 0.486 | -6    | 0.327   | none |
| FLNC     | -0.148 | -0.1437 | -1.059 | 0.31533 | 0.486 | -6    | 0.91949 | none |
| NDUFB5   | -0.171 | -0.2807 | -1.059 | 0.31538 | 0.486 | -6    | 1.32062 | none |

|           |        |         |        |         |       |       |         |      |
|-----------|--------|---------|--------|---------|-------|-------|---------|------|
| TPST1     | 0.211  | 0.1414  | 1.0589 | 0.31543 | 0.486 | -6    | 1.77561 | none |
| AMOTL1    | -0.09  | -0.0572 | -1.059 | 0.31547 | 0.486 | -6    | -0.5832 | none |
| PHF8      | 0.19   | 0.315   | 1.0586 | 0.31557 | 0.486 | -6    | 0.63146 | none |
| SPTA1     | -0.079 | -0.0721 | -1.058 | 0.31578 | 0.487 | -6    | 0.52786 | none |
| SPATA7    | 0.284  | 0.2468  | 1.058  | 0.31582 | 0.487 | -6    | -0.7479 | none |
| WDR74     | 0.078  | 0.0983  | 1.0578 | 0.3159  | 0.487 | -6    | 1.40667 | none |
| TPCN2     | 0.103  | 0.0655  | 1.057  | 0.31624 | 0.487 | -6    | -0.4678 | none |
| CITED4    | -0.096 | -0.0907 | -1.057 | 0.31624 | 0.487 | -6    | 1.0209  | none |
| DYRK1B    | 0.133  | 0.1603  | 1.057  | 0.31625 | 0.487 | -6    | -0.074  | none |
| WDR53     | 0.158  | 0.1206  | 1.0569 | 0.31627 | 0.487 | -6    | 0.30669 | none |
| CXCL3     | -0.1   | -0.0791 | -1.057 | 0.31634 | 0.487 | -6    | 2.08918 | none |
| AIRE      | 0.137  | 0.107   | 1.0566 | 0.31642 | 0.487 | -6    | -0.4882 | none |
| SEZ6L     | -0.099 | -0.0977 | -1.057 | 0.31645 | 0.487 | -6    | 1.51812 | none |
| SSC4D     | 0.13   | 0.0961  | 1.0565 | 0.31647 | 0.487 | -6    | 1.06049 | none |
| ACOX3     | 0.085  | 0.1173  | 1.0563 | 0.31656 | 0.487 | -6    | 0.44887 | none |
| SLF1      | 0.168  | 0.1372  | 1.0559 | 0.31672 | 0.488 | -6    | -0.6    | none |
| PRLH      | 0.144  | 0.144   | 1.0558 | 0.31675 | 0.488 | -6    | 1.19688 | none |
| DEPDC7    | 0.104  | 0.0585  | 1.0555 | 0.31688 | 0.488 | -6    | -0.0535 | none |
| PAK3      | 0.158  | 0.0834  | 1.0552 | 0.31702 | 0.488 | -6    | -0.4309 | none |
| C10ORF55  | 0.085  | 0.0882  | 1.055  | 0.31711 | 0.488 | -6    | 0.13565 | none |
| LRMP      | 0.21   | 0.1218  | 1.055  | 0.31712 | 0.488 | -6    | 0.07225 | none |
| ABL1      | 0.239  | 0.4283  | 1.0547 | 0.31722 | 0.488 | -6    | 0.52698 | none |
| LKAAEAR1  | 0.075  | 0.0756  | 1.0547 | 0.31724 | 0.488 | -6    | 0.67078 | none |
| BHLHE41   | 0.115  | 0.121   | 1.0547 | 0.31725 | 0.488 | -6    | -0.7042 | none |
| KRTAP19-1 | -0.136 | -0.1361 | -1.054 | 0.31758 | 0.489 | -6    | 1.9054  | none |
| PRICKLE4  | 0.235  | 0.1895  | 1.0537 | 0.31768 | 0.489 | -6.01 | -1.1891 | none |
| MAP1LC3B  | -0.192 | -0.1715 | -1.054 | 0.31773 | 0.489 | -6.01 | 0.47518 | none |
| NUCKS1    | 0.221  | 0.2528  | 1.0536 | 0.31773 | 0.489 | -6.01 | -0.4605 | none |
| LHFPL2    | -0.171 | -0.0687 | -1.053 | 0.31779 | 0.489 | -6.01 | 1.17288 | none |
| E2F8      | 0.217  | 0.2691  | 1.0534 | 0.31782 | 0.489 | -6.01 | -0.1194 | none |
| HIST1H4C  | -0.328 | -0.2681 | -1.053 | 0.31789 | 0.489 | -6.01 | 1.13426 | none |
| GTSE1     | 0.157  | 0.1852  | 1.053  | 0.31797 | 0.489 | -6.01 | -0.6196 | none |
| LRIT1     | 0.084  | 0.0843  | 1.0529 | 0.31803 | 0.489 | -6.01 | 0.75515 | none |
| SPRR1A    | 0.142  | 0.142   | 1.0526 | 0.31814 | 0.489 | -6.01 | 1.19688 | none |
| C12ORF56  | -0.109 | -0.0841 | -1.053 | 0.3182  | 0.489 | -6.01 | 1.4843  | none |
| HNRNPAB   | -0.116 | -0.024  | -1.052 | 0.31825 | 0.489 | -6.01 | 0.68576 | none |
| RBM12     | 0.113  | 0.1273  | 1.0523 | 0.31828 | 0.489 | -6.01 | -0.2172 | none |
| NFXL1     | 0.198  | 0.2061  | 1.0522 | 0.31833 | 0.489 | -6.01 | 0.10146 | none |
| SYDE1     | -0.163 | -0.0818 | -1.052 | 0.31833 | 0.489 | -6.01 | 0.20251 | none |
| BAG4      | 0.212  | 0.1837  | 1.052  | 0.31841 | 0.489 | -6.01 | -0.4847 | none |

|           |        |         |        |         |       |       |         |      |
|-----------|--------|---------|--------|---------|-------|-------|---------|------|
| CFAP61    | -0.136 | -0.0649 | -1.052 | 0.31861 | 0.489 | -6.01 | -0.0342 | none |
| LCE3D     | 0.141  | 0.1413  | 1.0515 | 0.31862 | 0.489 | -6.01 | 1.19688 | none |
| MLST8     | 0.13   | 0.0963  | 1.0511 | 0.3188  | 0.49  | -6.01 | -0.0313 | none |
| WDR75     | 0.136  | 0.1102  | 1.0511 | 0.31882 | 0.49  | -6.01 | 1.28576 | none |
| CPTP      | 0.152  | 0.1426  | 1.0509 | 0.3189  | 0.49  | -6.01 | 0.14772 | none |
| RABIF     | -0.137 | -0.1756 | -1.051 | 0.31891 | 0.49  | -6.01 | 0.8865  | none |
| RAD17     | 0.304  | 0.1689  | 1.0506 | 0.31901 | 0.49  | -6.01 | -0.9524 | none |
| IFIT5     | 0.103  | 0.0514  | 1.0506 | 0.31904 | 0.49  | -6.01 | 1.08178 | none |
| APOA5     | -0.082 | -0.0586 | -1.05  | 0.31908 | 0.49  | -6.01 | 0.66201 | none |
| GPIHBP1   | 0.069  | 0.0689  | 1.0503 | 0.31915 | 0.49  | -6.01 | 0.65061 | none |
| MRPL4     | 0.11   | 0.0819  | 1.05   | 0.3193  | 0.49  | -6.01 | -0.3319 | none |
| METTL18   | -0.12  | -0.164  | -1.05  | 0.31932 | 0.49  | -6.01 | 0.99819 | none |
| MSLNL     | -0.072 | -0.034  | -1.05  | 0.31936 | 0.49  | -6.01 | 1.95957 | none |
| DEFB107A  | -0.092 | -0.0519 | -1.05  | 0.31943 | 0.49  | -6.01 | 0.17954 | none |
| DEFB107B  | -0.092 | -0.0519 | -1.05  | 0.31943 | 0.49  | -6.01 | 0.17954 | none |
| NXF3      | 0.078  | 0.1083  | 1.0497 | 0.31943 | 0.49  | -6.01 | -0.58   | none |
| GRHL3     | -0.115 | -0.1258 | -1.049 | 0.31956 | 0.49  | -6.01 | 0.63837 | none |
| KRTAP22-1 | 0.14   | 0.14    | 1.0493 | 0.31958 | 0.49  | -6.01 | -0.511  | none |
| GNB2      | -0.231 | -0.1954 | -1.049 | 0.31979 | 0.49  | -6.01 | 0.94654 | none |
| HSD17B12  | 0.162  | 0.0506  | 1.0488 | 0.31981 | 0.49  | -6.01 | -0.3017 | none |
| DEFB123   | 0.14   | 0.1397  | 1.0488 | 0.31983 | 0.49  | -6.01 | 0.44852 | none |
| FABP12    | -0.075 | -0.0502 | -1.049 | 0.31992 | 0.49  | -6.01 | 1.24897 | none |
| HEPACAM   | -0.08  | -0.0708 | -1.049 | 0.31994 | 0.49  | -6.01 | 0.49575 | none |
| ZNF24     | -0.147 | -0.0967 | -1.048 | 0.31995 | 0.49  | -6.01 | 1.85106 | none |
| RLF       | 0.265  | 0.3404  | 1.0485 | 0.31997 | 0.49  | -6.01 | 0.08349 | none |
| SLC6A15   | 0.098  | 0.1018  | 1.0482 | 0.32006 | 0.491 | -6.01 | 0.63154 | none |
| UCHL1     | 0.213  | 0.2672  | 1.0482 | 0.32006 | 0.491 | -6.01 | 0.46696 | none |
| BATF2     | 0.083  | 0.0722  | 1.0482 | 0.32008 | 0.491 | -6.01 | 0.16655 | none |
| C1GALT1   | 0.127  | 0.0839  | 1.0481 | 0.32011 | 0.491 | -6.01 | 0.63999 | none |
| SPRR3     | -0.133 | -0.1328 | -1.048 | 0.32019 | 0.491 | -6.01 | 1.55345 | none |
| PHOX2B    | -0.174 | -0.1736 | -1.048 | 0.32019 | 0.491 | -6.01 | 1.57654 | none |
| NUDT6     | 0.121  | 0.0666  | 1.0475 | 0.32037 | 0.491 | -6.01 | -0.186  | none |
| BCL11B    | 0.194  | 0.1774  | 1.0473 | 0.32046 | 0.491 | -6.01 | 0.08143 | none |
| RFX7      | 0.28   | 0.3695  | 1.0472 | 0.32052 | 0.491 | -6.01 | -0.2526 | none |
| CFAP65    | -0.098 | -0.0547 | -1.046 | 0.32087 | 0.491 | -6.01 | 1.06404 | none |
| CRIM1     | 0.236  | 0.3139  | 1.0463 | 0.32091 | 0.491 | -6.01 | 0.67161 | none |
| CRYM      | -0.078 | -0.0474 | -1.046 | 0.32093 | 0.491 | -6.01 | 1.34597 | none |
| STK39     | -0.162 | -0.0575 | -1.046 | 0.32116 | 0.492 | -6.01 | 0.12207 | none |
| DNAJC6    | -0.124 | -0.0135 | -1.046 | 0.32119 | 0.492 | -6.01 | 1.68465 | none |
| C2CD5     | 0.241  | 0.2151  | 1.0457 | 0.32119 | 0.492 | -6.01 | -0.3825 | none |

|           |        |         |        |         |       |       |         |      |
|-----------|--------|---------|--------|---------|-------|-------|---------|------|
| DYNC1LI1  | -0.134 | -0.0759 | -1.045 | 0.32127 | 0.492 | -6.01 | 1.98195 | none |
| TRHR      | 0.076  | 0.0758  | 1.0453 | 0.32136 | 0.492 | -6.01 | 0.54573 | none |
| INF2      | 0.139  | 0.2045  | 1.0451 | 0.32144 | 0.492 | -6.01 | 0.2081  | none |
| ANXA1     | 0.126  | 0.062   | 1.0449 | 0.32151 | 0.492 | -6.01 | 1.528   | none |
| CACNA1I   | 0.159  | 0.161   | 1.0448 | 0.32155 | 0.492 | -6.01 | -0.6978 | none |
| KIF26B    | -0.084 | -0.0723 | -1.045 | 0.32158 | 0.492 | -6.01 | -0.3803 | none |
| ZNF837    | 0.101  | 0.118   | 1.0447 | 0.3216  | 0.492 | -6.01 | 0.69791 | none |
| TAF10     | -0.124 | -0.0826 | -1.045 | 0.32164 | 0.492 | -6.01 | 1.7523  | none |
| MTPN      | -0.144 | -0.1946 | -1.045 | 0.32169 | 0.492 | -6.01 | 1.23771 | none |
| PAFAH1B3  | -0.136 | -0.1646 | -1.044 | 0.32176 | 0.492 | -6.01 | 0.09084 | none |
| HNRNPCL4  | 0.081  | 0.0701  | 1.0441 | 0.32188 | 0.492 | -6.01 | 0.09135 | none |
| TMEM240   | 0.088  | 0.1004  | 1.044  | 0.32194 | 0.492 | -6.01 | 0.85572 | none |
| JAK2      | 0.209  | 0.3249  | 1.0438 | 0.32202 | 0.492 | -6.02 | 0.83136 | none |
| CDK8      | 0.12   | 0.0883  | 1.0436 | 0.32211 | 0.492 | -6.02 | 1.05444 | none |
| PLIN1     | 0.137  | 0.1526  | 1.0434 | 0.32217 | 0.493 | -6.02 | 0.86691 | none |
| ADAMTS7   | -0.123 | -0.0673 | -1.043 | 0.32223 | 0.493 | -6.02 | -0.2733 | none |
| FOXO2     | 0.077  | 0.0938  | 1.0431 | 0.32233 | 0.493 | -6.02 | -0.3531 | none |
| CSTF1     | 0.093  | -0.0246 | 1.0429 | 0.3224  | 0.493 | -6.02 | -0.2962 | none |
| BBS4      | 0.294  | 0.2735  | 1.0429 | 0.32242 | 0.493 | -6.02 | -0.5029 | none |
| ZNF140    | 0.128  | 0.1078  | 1.0426 | 0.32252 | 0.493 | -6.02 | 0.262   | none |
| HEBP2     | 0.127  | 0.084   | 1.0425 | 0.32258 | 0.493 | -6.02 | 1.52875 | none |
| TET2      | 0.378  | 0.4822  | 1.0423 | 0.32265 | 0.493 | -6.02 | 0.55382 | none |
| MROH9     | -0.071 | -0.0556 | -1.042 | 0.32265 | 0.493 | -6.02 | 0       | none |
| PPP1R17   | 0.087  | 0.0873  | 1.0423 | 0.32266 | 0.493 | -6.02 | -0.7793 | none |
| 3-Mar     | 0.19   | 0.1202  | 1.0421 | 0.32277 | 0.493 | -6.02 | -0.4345 | none |
| SPIC      | -0.075 | -0.0497 | -1.042 | 0.32281 | 0.493 | -6.02 | 0.24793 | none |
| IER5      | -0.12  | -0.06   | -1.041 | 0.32307 | 0.493 | -6.02 | 0.1799  | none |
| KRTAP22-2 | 0.135  | 0.1352  | 1.041  | 0.32324 | 0.494 | -6.02 | 1.19688 | none |
| PCDHAC2   | -0.129 | -0.1292 | -1.041 | 0.32324 | 0.494 | -6.02 | 1.05226 | none |
| MRPL9     | -0.104 | -0.1319 | -1.041 | 0.32328 | 0.494 | -6.02 | 0.6579  | none |
| KCNJ9     | -0.069 | -0.0416 | -1.041 | 0.32328 | 0.494 | -6.02 | -0.0653 | none |
| POSTN     | -0.125 | -0.1257 | -1.04  | 0.32358 | 0.494 | -6.02 | 1.53529 | none |
| AVPI1     | -0.085 | 0.0049  | -1.04  | 0.32368 | 0.494 | -6.02 | 0.83059 | none |
| GSAP      | 0.137  | 0.1241  | 1.0399 | 0.32373 | 0.494 | -6.02 | 1.26372 | none |
| HHIPL2    | 0.135  | 0.1171  | 1.0398 | 0.32377 | 0.494 | -6.02 | 0.72611 | none |
| FANCB     | 0.114  | 0.1197  | 1.0396 | 0.32388 | 0.494 | -6.02 | 0.91092 | none |
| TPM3      | -0.094 | -0.0447 | -1.039 | 0.32391 | 0.494 | -6.02 | 0.26797 | none |
| DNAJB6    | 0.102  | 0.0801  | 1.0392 | 0.32402 | 0.494 | -6.02 | 0.1424  | none |
| ADIG      | -0.128 | -0.1282 | -1.039 | 0.32413 | 0.494 | -6.02 | 0.88916 | none |
| MRPL53    | -0.149 | -0.1655 | -1.039 | 0.32421 | 0.495 | -6.02 | 1.55349 | none |



|          |        |         |        |         |       |       |         |      |
|----------|--------|---------|--------|---------|-------|-------|---------|------|
| MUC3A    | 0.098  | 0.0768  | 1.0387 | 0.32427 | 0.495 | -6.02 | 1.09553 | none |
| ZNF502   | -0.081 | -0.06   | -1.038 | 0.3244  | 0.495 | -6.02 | 0.34409 | none |
| CTSH     | -0.2   | -0.1757 | -1.038 | 0.32445 | 0.495 | -6.02 | 1.32482 | none |
| TNFSF11  | 0.17   | 0.0961  | 1.038  | 0.32455 | 0.495 | -6.02 | 0.17586 | none |
| MBD3L2   | 0.134  | 0.1336  | 1.038  | 0.32456 | 0.495 | -6.02 | -0.7798 | none |
| FAM13C   | 0.085  | 0.0854  | 1.0376 | 0.32474 | 0.495 | -6.02 | -0.4811 | none |
| COL5A3   | 0.09   | 0.1294  | 1.0375 | 0.3248  | 0.495 | -6.02 | 0.26707 | none |
| ARHGAP4  | 0.081  | 0.0586  | 1.0374 | 0.32483 | 0.495 | -6.02 | -1.247  | none |
| MED16    | 0.164  | 0.1621  | 1.0373 | 0.32487 | 0.495 | -6.02 | 0.38135 | none |
| TNFRSF18 | -0.11  | -0.0985 | -1.037 | 0.32496 | 0.495 | -6.02 | 1.12138 | none |
| KDF1     | 0.107  | 0.0817  | 1.0367 | 0.32513 | 0.495 | -6.02 | -1.1139 | none |
| SLC25A52 | 0.111  | 0.1411  | 1.0367 | 0.32514 | 0.495 | -6.02 | 1.23816 | none |
| HIPK2    | 0.265  | 0.3921  | 1.0366 | 0.32517 | 0.495 | -6.02 | -0.3283 | none |
| RNF38    | 0.128  | 0.0851  | 1.0362 | 0.32538 | 0.496 | -6.02 | -0.3896 | none |
| CPSF6    | 0.118  | 0.1403  | 1.0361 | 0.32539 | 0.496 | -6.02 | -0.0537 | none |
| MFSD10   | -0.121 | -0.1344 | -1.036 | 0.32539 | 0.496 | -6.02 | 1.6341  | none |
| CCR8     | 0.289  | 0.3772  | 1.0361 | 0.32543 | 0.496 | -6.02 | -0.0813 | none |
| PPFIBP2  | 0.327  | 0.4001  | 1.036  | 0.32544 | 0.496 | -6.02 | -0.2093 | none |
| PCBP2    | -0.084 | -0.1065 | -1.036 | 0.32556 | 0.496 | -6.02 | 1.70848 | none |
| NYNRIN   | -0.081 | -0.0852 | -1.036 | 0.32567 | 0.496 | -6.02 | -0.7074 | none |
| TRPM1    | -0.094 | -0.0825 | -1.035 | 0.32595 | 0.496 | -6.02 | -0.4408 | none |
| ZNF142   | 0.278  | 0.437   | 1.0348 | 0.326   | 0.496 | -6.02 | 0.24207 | none |
| TMEM88   | -0.153 | -0.1198 | -1.035 | 0.326   | 0.496 | -6.02 | 0.8529  | none |
| TNIP1    | 0.252  | 0.3847  | 1.0346 | 0.32607 | 0.496 | -6.02 | 0.44634 | none |
| TOP1     | 0.417  | 0.5821  | 1.0345 | 0.3261  | 0.496 | -6.02 | -0.0929 | none |
| ABCA4    | 0.146  | 0.1554  | 1.0344 | 0.32614 | 0.496 | -6.02 | 0.58594 | none |
| NSFL1C   | 0.094  | 0.1031  | 1.0344 | 0.32617 | 0.496 | -6.02 | -0.7243 | none |
| MYF6     | 0.073  | 0.0552  | 1.0343 | 0.3262  | 0.496 | -6.02 | 0.38883 | none |
| OR5K3    | 0.075  | 0.0501  | 1.0341 | 0.32631 | 0.496 | -6.02 | 0.20876 | none |
| AP1S1    | -0.145 | -0.1689 | -1.034 | 0.32646 | 0.497 | -6.03 | 0.39214 | none |
| ZNF510   | 0.269  | 0.3743  | 1.0337 | 0.32648 | 0.497 | -6.03 | 1.21274 | none |
| HLA-DRB1 | -0.125 | -0.1338 | -1.033 | 0.32658 | 0.497 | -6.03 | 0.89155 | none |
| ACTR5    | -0.158 | -0.0772 | -1.033 | 0.32672 | 0.497 | -6.03 | 1.85054 | none |
| RNASEH1  | 0.124  | 0.1021  | 1.0331 | 0.32675 | 0.497 | -6.03 | -0.3566 | none |
| FXYD1    | -0.125 | -0.1662 | -1.033 | 0.3269  | 0.497 | -6.03 | 0.3438  | none |
| THY1     | 0.111  | 0.1812  | 1.0326 | 0.32695 | 0.497 | -6.03 | 0.80369 | none |
| IGDCC4   | 0.071  | 0.0805  | 1.0326 | 0.32696 | 0.497 | -6.03 | -0.4963 | none |
| GPR146   | 0.284  | 0.2051  | 1.0323 | 0.32708 | 0.497 | -6.03 | 0.53184 | none |
| TSR1     | 0.147  | 0.1746  | 1.0323 | 0.32711 | 0.497 | -6.03 | 0.4892  | none |
| DCPS     | -0.134 | -0.1095 | -1.032 | 0.32713 | 0.497 | -6.03 | 1.65028 | none |

|         |        |         |        |         |       |       |         |      |
|---------|--------|---------|--------|---------|-------|-------|---------|------|
| RSL24D1 | -0.132 | -0.1652 | -1.032 | 0.32713 | 0.497 | -6.03 | 0.35563 | none |
| ZMYND11 | 0.197  | 0.2336  | 1.0318 | 0.3273  | 0.497 | -6.03 | 0.45336 | none |
| SRP54   | -0.106 | -0.0838 | -1.031 | 0.32745 | 0.498 | -6.03 | 1.34856 | none |
| DOK7    | 0.098  | 0.0727  | 1.031  | 0.32766 | 0.498 | -6.03 | -0.6189 | none |
| YPEL1   | 0.156  | 0.0853  | 1.031  | 0.32769 | 0.498 | -6.03 | 0.24165 | none |
| NUS1    | 0.115  | 0.0737  | 1.0309 | 0.32773 | 0.498 | -6.03 | 0.33245 | none |
| TMEM61  | -0.086 | -0.0768 | -1.031 | 0.32774 | 0.498 | -6.03 | 2.03347 | none |
| FBXL6   | -0.128 | -0.0464 | -1.031 | 0.32776 | 0.498 | -6.03 | 0.84675 | none |
| GNG12   | 0.1    | 0.1036  | 1.0305 | 0.32788 | 0.498 | -6.03 | 1.2488  | none |
| NRTN    | 0.105  | 0.0628  | 1.0305 | 0.32788 | 0.498 | -6.03 | -0.7194 | none |
| RING1   | -0.097 | -0.0378 | -1.03  | 0.3279  | 0.498 | -6.03 | 1.30127 | none |
| RIMS4   | 0.082  | 0.0832  | 1.0303 | 0.328   | 0.498 | -6.03 | 0.74543 | none |
| RAB24   | 0.112  | 0.0947  | 1.0301 | 0.3281  | 0.498 | -6.03 | -0.0665 | none |
| NME1-NM | 0.113  | 0.0359  | 1.03   | 0.32812 | 0.498 | -6.03 | -0.2809 | none |
| CBLN1   | 0.098  | 0.0729  | 1.0299 | 0.32815 | 0.498 | -6.03 | 1.46465 | none |
| LYG2    | 0.23   | 0.1656  | 1.0296 | 0.3283  | 0.498 | -6.03 | -0.7097 | none |
| PLAC1   | -0.245 | -0.2436 | -1.029 | 0.32848 | 0.498 | -6.03 | 0.48123 | none |
| EVC2    | 0.079  | 0.0972  | 1.0291 | 0.32851 | 0.498 | -6.03 | 0.62064 | none |
| KALRN   | 0.202  | 0.1526  | 1.0291 | 0.32854 | 0.498 | -6.03 | -0.9369 | none |
| PNPLA7  | 0.085  | 0.0728  | 1.0289 | 0.32859 | 0.499 | -6.03 | -0.1125 | none |
| GABRA4  | 0.109  | 0.109   | 1.0287 | 0.32872 | 0.499 | -6.03 | 0.4387  | none |
| HEXIM1  | 0.202  | 0.2698  | 1.0283 | 0.32889 | 0.499 | -6.03 | 0.57111 | none |
| ZNF761  | 0.248  | 0.2961  | 1.0283 | 0.3289  | 0.499 | -6.03 | 0.62771 | none |
| KIF20B  | 0.33   | 0.4025  | 1.028  | 0.32899 | 0.499 | -6.03 | -0.3423 | none |
| FDPS    | -0.11  | -0.1158 | -1.028 | 0.329   | 0.499 | -6.03 | 0.59289 | none |
| MAF     | 0.164  | 0.2085  | 1.028  | 0.32903 | 0.499 | -6.03 | -0.2359 | none |
| MMP21   | 0.096  | 0.1204  | 1.0272 | 0.32936 | 0.499 | -6.03 | 0.58728 | none |
| GALNT3  | 0.144  | 0.1412  | 1.0266 | 0.32963 | 0.5   | -6.03 | -0.1168 | none |
| AKR7A3  | 0.083  | 0.0969  | 1.0266 | 0.32966 | 0.5   | -6.03 | 1.13938 | none |
| UBB     | -0.123 | -0.1417 | -1.026 | 0.32978 | 0.5   | -6.03 | 0.84143 | none |
| TMF1    | 0.229  | 0.2638  | 1.0254 | 0.33018 | 0.5   | -6.03 | -0.2869 | none |
| CD47    | -0.129 | -0.1737 | -1.025 | 0.33023 | 0.5   | -6.03 | 1.37377 | none |
| LYZL1   | 0.127  | 0.127   | 1.025  | 0.33034 | 0.501 | -6.03 | 0.7508  | none |
| ENPP3   | -0.1   | -0.0643 | -1.025 | 0.33051 | 0.501 | -6.03 | 0.57792 | none |
| MTMR1   | 0.165  | 0.1944  | 1.0247 | 0.33051 | 0.501 | -6.03 | -0.5619 | none |
| TSC22D1 | 0.115  | 0.1382  | 1.0247 | 0.33051 | 0.501 | -6.03 | -0.1671 | none |
| MESP1   | -0.206 | -0.1777 | -1.024 | 0.33064 | 0.501 | -6.03 | 0.90511 | none |
| CASP7   | 0.103  | 0.117   | 1.0244 | 0.33065 | 0.501 | -6.03 | 0.78685 | none |
| EPHA2   | -0.133 | -0.0418 | -1.024 | 0.33081 | 0.501 | -6.04 | 0.58    | none |
| ZBED8   | -0.096 | -0.091  | -1.024 | 0.33086 | 0.501 | -6.04 | 0.20017 | none |

|           |        |         |        |         |       |       |         |      |
|-----------|--------|---------|--------|---------|-------|-------|---------|------|
| TMEM53    | 0.161  | 0.156   | 1.0235 | 0.33102 | 0.501 | -6.04 | 0.73519 | none |
| IL5       | -0.196 | -0.0504 | -1.024 | 0.33103 | 0.501 | -6.04 | 0.64862 | none |
| TBRG4     | 0.12   | 0.1075  | 1.0234 | 0.33107 | 0.501 | -6.04 | 0.2658  | none |
| ACTR1B    | 0.12   | 0.1216  | 1.0225 | 0.33148 | 0.502 | -6.04 | 1.32834 | none |
| PPP1R2    | -0.11  | -0.1394 | -1.022 | 0.33156 | 0.502 | -6.04 | 1.49132 | none |
| PA2G4     | -0.128 | -0.031  | -1.022 | 0.33169 | 0.502 | -6.04 | 1.59566 | none |
| AATK      | -0.111 | -0.1007 | -1.022 | 0.33169 | 0.502 | -6.04 | 1.49902 | none |
| CCDC153   | 0.102  | 0.1242  | 1.022  | 0.33171 | 0.502 | -6.04 | 0.91733 | none |
| UBE2F     | 0.121  | 0.0329  | 1.0217 | 0.33185 | 0.502 | -6.04 | -0.4992 | none |
| BNIP1     | -0.097 | -0.1146 | -1.021 | 0.33193 | 0.502 | -6.04 | 0.9937  | none |
| SIRT7     | 0.189  | 0.1699  | 1.0214 | 0.33195 | 0.502 | -6.04 | -0.6933 | none |
| SRPK1     | 0.107  | 0.0884  | 1.0214 | 0.33196 | 0.502 | -6.04 | -0.3412 | none |
| AMFR      | 0.239  | 0.1675  | 1.0214 | 0.33199 | 0.502 | -6.04 | 0.86259 | none |
| SHC3      | -0.104 | -0.1017 | -1.021 | 0.33205 | 0.502 | -6.04 | 0.83391 | none |
| EIF2B2    | -0.075 | -0.071  | -1.021 | 0.33213 | 0.502 | -6.04 | 1.33052 | none |
| CT62      | -0.071 | -0.0502 | -1.021 | 0.33226 | 0.502 | -6.04 | 2.06384 | none |
| LYPD4     | 0.082  | 0.0573  | 1.0208 | 0.33227 | 0.502 | -6.04 | -1.1505 | none |
| AC241377  | 0.125  | 0.125   | 1.0206 | 0.33232 | 0.502 | -6.04 | -0.5847 | none |
| SLC22A23  | 0.096  | 0.0935  | 1.0204 | 0.3324  | 0.503 | -6.04 | 1.24376 | none |
| MCM10     | 0.301  | 0.4231  | 1.0204 | 0.33243 | 0.503 | -6.04 | 0.6824  | none |
| ASAH2     | 0.189  | -0.0014 | 1.0202 | 0.33251 | 0.503 | -6.04 | -0.5143 | none |
| RPL3      | -0.101 | -0.0371 | -1.02  | 0.33255 | 0.503 | -6.04 | 0.60208 | none |
| GDF3      | -0.082 | -0.0596 | -1.02  | 0.3326  | 0.503 | -6.04 | 1.19215 | none |
| NREP      | 0.217  | 0.2426  | 1.02   | 0.33261 | 0.503 | -6.04 | -0.1497 | none |
| HIST1H3E  | 0.237  | 0.129   | 1.0198 | 0.3327  | 0.503 | -6.04 | -0.8045 | none |
| TMEM60    | -0.178 | -0.2624 | -1.02  | 0.33279 | 0.503 | -6.04 | 1.65819 | none |
| MEPCE     | -0.147 | -0.014  | -1.019 | 0.33287 | 0.503 | -6.04 | 0.23544 | none |
| AMER1     | 0.099  | 0.1346  | 1.0194 | 0.33289 | 0.503 | -6.04 | 0.55482 | none |
| PYROXD2   | 0.326  | 0.2232  | 1.0194 | 0.3329  | 0.503 | -6.04 | -0.4427 | none |
| AAR2      | -0.078 | -0.0555 | -1.019 | 0.333   | 0.503 | -6.04 | 1.24309 | none |
| ARHGAP23  | 0.177  | 0.2029  | 1.0191 | 0.33303 | 0.503 | -6.04 | 0.89552 | none |
| LY75-CD3C | 0.162  | 0.2066  | 1.019  | 0.33304 | 0.503 | -6.04 | 0.29233 | none |
| TEX43     | 0.124  | 0.1242  | 1.019  | 0.33305 | 0.503 | -6.04 | 1.66721 | none |
| MFAP2     | 0.116  | 0.1177  | 1.019  | 0.33307 | 0.503 | -6.04 | 1.21943 | none |
| DERL1     | -0.151 | -0.2307 | -1.019 | 0.33307 | 0.503 | -6.04 | 0.00733 | none |
| C2ORF70   | -0.103 | -0.1012 | -1.019 | 0.33322 | 0.503 | -6.04 | -0.4792 | none |
| LRTM1     | -0.086 | -0.0845 | -1.019 | 0.33323 | 0.503 | -6.04 | 1.32879 | none |
| SERP2     | -0.124 | -0.1054 | -1.019 | 0.33327 | 0.503 | -6.04 | 0.36887 | none |
| VPS41     | 0.132  | 0.062   | 1.018  | 0.33351 | 0.503 | -6.04 | 0.63943 | none |
| TRIM21    | -0.102 | -0.0866 | -1.018 | 0.33358 | 0.503 | -6.04 | 1.32425 | none |

|          |        |         |        |         |       |       |         |            |
|----------|--------|---------|--------|---------|-------|-------|---------|------------|
| GDAP2    | 0.13   | 0.0261  | 1.0175 | 0.33371 | 0.504 | -6.04 | 0.84997 | none       |
| TFG      | 0.078  | 0.0668  | 1.0175 | 0.33375 | 0.504 | -6.04 | 0.73868 | none       |
| COPS4    | -0.107 | -0.1202 | -1.017 | 0.33377 | 0.504 | -6.04 | 0.70865 | none       |
| MYOT     | 0.245  | 0.0888  | 1.0173 | 0.33381 | 0.504 | -6.04 | -0.9719 | none       |
| ATP6V0C  | 0.12   | 0.0291  | 1.0172 | 0.33387 | 0.504 | -6.04 | -0.2716 | none       |
| NFU1     | -0.208 | -0.2879 | -1.017 | 0.33397 | 0.504 | -6.04 | 0.64922 | none       |
| IDI1     | -0.125 | -0.1187 | -1.017 | 0.33398 | 0.504 | -6.04 | 2.14599 | AA-related |
| CHORDC1  | 0.093  | 0.0438  | 1.0165 | 0.3342  | 0.504 | -6.04 | -0.949  | none       |
| BHLHA15  | 0.113  | 0.0755  | 1.0164 | 0.33423 | 0.504 | -6.04 | 1.49017 | none       |
| NANOS3   | 0.188  | 0.1058  | 1.0163 | 0.33426 | 0.504 | -6.04 | 1.50487 | none       |
| SPRY1    | 0.141  | 0.1518  | 1.0162 | 0.33433 | 0.504 | -6.04 | 0.84474 | none       |
| ERCC2    | 0.174  | 0.1649  | 1.0161 | 0.33439 | 0.504 | -6.04 | -0.1661 | none       |
| WDR25    | 0.18   | 0.079   | 1.016  | 0.33439 | 0.504 | -6.04 | -0.8226 | none       |
| GNPDA2   | 0.111  | -0.0145 | 1.016  | 0.3344  | 0.504 | -6.04 | 1.45839 | none       |
| TMEM14B  | -0.181 | -0.2801 | -1.016 | 0.33443 | 0.504 | -6.04 | 0.79536 | none       |
| PPIL2    | 0.202  | 0.2903  | 1.0159 | 0.33446 | 0.504 | -6.04 | 0.83598 | none       |
| FECH     | 0.089  | 0.0724  | 1.0156 | 0.33461 | 0.504 | -6.04 | 1.55203 | none       |
| CD44     | 0.079  | 0.0162  | 1.0156 | 0.33461 | 0.504 | -6.04 | 0.03875 | none       |
| TAGLN    | 0.196  | 0.2315  | 1.0154 | 0.33469 | 0.504 | -6.04 | 1.01772 | none       |
| ZBTB2    | 0.185  | 0.2488  | 1.0154 | 0.33469 | 0.504 | -6.04 | 0.33641 | none       |
| CTSV     | 0.106  | 0.0065  | 1.0148 | 0.33497 | 0.505 | -6.04 | -0.5079 | none       |
| ADCY4    | -0.092 | -0.0628 | -1.015 | 0.33501 | 0.505 | -6.04 | 0.95898 | none       |
| SELPLG   | 0.231  | 0.24    | 1.0147 | 0.33501 | 0.505 | -6.04 | 0.12154 | none       |
| ATP2A3   | 0.166  | 0.2312  | 1.0143 | 0.33518 | 0.505 | -6.04 | -0.0074 | none       |
| ZNF518B  | 0.236  | 0.2011  | 1.0141 | 0.33527 | 0.505 | -6.04 | 0.07849 | none       |
| HSPA1B   | 0.301  | 0.2598  | 1.0141 | 0.33529 | 0.505 | -6.04 | 0.56569 | none       |
| MT-ATP6  | 0.22   | 0.2462  | 1.014  | 0.33532 | 0.505 | -6.04 | 0.4636  | none       |
| TXNDC2   | -0.071 | -0.0498 | -1.014 | 0.33532 | 0.505 | -6.04 | 1.06194 | none       |
| RYR1     | -0.205 | -0.0316 | -1.014 | 0.33534 | 0.505 | -6.05 | 0.32883 | none       |
| MDGA1    | 0.238  | 0.1943  | 1.0139 | 0.33536 | 0.505 | -6.05 | -0.6505 | none       |
| C1ORF127 | -0.15  | -0.138  | -1.014 | 0.33553 | 0.505 | -6.05 | 1.204   | none       |
| CALY     | -0.077 | -0.0784 | -1.013 | 0.33556 | 0.505 | -6.05 | -0.7692 | none       |
| ABCF1    | 0.455  | 0.5335  | 1.0134 | 0.33558 | 0.505 | -6.05 | -0.9732 | none       |
| S100A12  | -0.117 | -0.1168 | -1.013 | 0.33559 | 0.505 | -6.05 | 0.88916 | none       |
| CD4      | 0.202  | 0.2632  | 1.0134 | 0.3356  | 0.505 | -6.05 | -0.343  | none       |
| DOK3     | -0.119 | 0.0614  | -1.013 | 0.33571 | 0.505 | -6.05 | 0.91709 | none       |
| CDC42EP2 | 0.152  | 0.1677  | 1.0129 | 0.33583 | 0.505 | -6.05 | 0.40971 | none       |
| TTC3     | 0.312  | 0.3823  | 1.0124 | 0.33604 | 0.505 | -6.05 | 0.52317 | none       |
| PRPS1    | -0.132 | -0.1403 | -1.012 | 0.3362  | 0.506 | -6.05 | 1.72646 | none       |
| LY6G6E   | 0.127  | 0.0837  | 1.012  | 0.33623 | 0.506 | -6.05 | 0.80262 | none       |

|          |        |         |        |         |       |       |         |      |
|----------|--------|---------|--------|---------|-------|-------|---------|------|
| STAT4    | 0.203  | 0.1883  | 1.0116 | 0.33642 | 0.506 | -6.05 | 0.11462 | none |
| KEL      | -0.088 | -0.0642 | -1.011 | 0.33653 | 0.506 | -6.05 | 0.82374 | none |
| ZSCAN23  | -0.109 | -0.0438 | -1.011 | 0.33661 | 0.506 | -6.05 | 1.49365 | none |
| MAL      | -0.191 | -0.2827 | -1.011 | 0.3368  | 0.506 | -6.05 | 1.079   | none |
| TRIM49D1 | 0.079  | 0.0817  | 1.0105 | 0.33693 | 0.506 | -6.05 | -0.6216 | none |
| CMTM5    | 0.081  | 0.0815  | 1.0104 | 0.33698 | 0.506 | -6.05 | 1.43614 | none |
| SKOR2    | -0.104 | -0.1094 | -1.01  | 0.337   | 0.506 | -6.05 | -0.3543 | none |
| ACTR2    | 0.094  | 0.0428  | 1.0101 | 0.33711 | 0.507 | -6.05 | 0.25406 | none |
| SLAMF1   | 0.17   | 0.2018  | 1.0098 | 0.33722 | 0.507 | -6.05 | -0.3595 | none |
| GAGE2A   | -0.173 | -0.1674 | -1.01  | 0.33723 | 0.507 | -6.05 | 0.52517 | none |
| MSRA     | 0.228  | 0.234   | 1.0097 | 0.33729 | 0.507 | -6.05 | 0.79717 | none |
| NKX6-3   | 0.07   | 0.0735  | 1.0096 | 0.33732 | 0.507 | -6.05 | -0.4771 | none |
| MT1M     | -0.115 | -0.1151 | -1.009 | 0.33746 | 0.507 | -6.05 | 1.9054  | none |
| ZNF155   | 0.279  | 0.2681  | 1.0092 | 0.33749 | 0.507 | -6.05 | -0.1324 | none |
| ZNF746   | 0.174  | 0.273   | 1.0092 | 0.33751 | 0.507 | -6.05 | 1.02559 | none |
| SYNGR3   | 0.292  | 0.2647  | 1.0091 | 0.33755 | 0.507 | -6.05 | -0.0984 | none |
| TBX5     | 0.071  | 0.0715  | 1.0089 | 0.33765 | 0.507 | -6.05 | 0.76095 | none |
| NCEH1    | 0.103  | 0.0107  | 1.0089 | 0.33765 | 0.507 | -6.05 | -0.7349 | none |
| GALNT14  | 0.159  | 0.1158  | 1.0088 | 0.33767 | 0.507 | -6.05 | -0.9004 | none |
| SLC22A3  | 0.079  | 0.0531  | 1.0084 | 0.33785 | 0.507 | -6.05 | 0.7242  | none |
| FAHD2A   | 0.1    | 0.0443  | 1.0079 | 0.33812 | 0.507 | -6.05 | -0.4977 | none |
| DNAJC10  | -0.132 | -0.033  | -1.008 | 0.33815 | 0.507 | -6.05 | 0.93809 | none |
| CA1      | 0.249  | 0.169   | 1.0075 | 0.33826 | 0.507 | -6.05 | -0.6213 | none |
| UGT2B10  | -0.066 | -0.0456 | -1.007 | 0.33828 | 0.507 | -6.05 | 0       | none |
| JADE2    | 0.25   | 0.33    | 1.0075 | 0.33829 | 0.507 | -6.05 | 0.32031 | none |
| MDFIC    | 0.139  | 0.0632  | 1.0075 | 0.33829 | 0.507 | -6.05 | -0.5075 | none |
| DLGAP5   | 0.384  | 0.4825  | 1.0073 | 0.33838 | 0.507 | -6.05 | -0.112  | none |
| C5ORF46  | 0.119  | 0.1191  | 1.0073 | 0.33838 | 0.507 | -6.05 | -0.4058 | none |
| TRANK1   | -0.152 | -0.0331 | -1.007 | 0.33842 | 0.507 | -6.05 | 0.90637 | none |
| TOMM70   | 0.151  | 0.194   | 1.0071 | 0.33845 | 0.507 | -6.05 | 0.95621 | none |
| RUSC1    | -0.102 | -0.0801 | -1.007 | 0.33848 | 0.507 | -6.05 | 1.97173 | none |
| FAM50B   | -0.093 | -0.0672 | -1.007 | 0.3385  | 0.507 | -6.05 | 1.441   | none |
| PDE8B    | 0.122  | 0.1332  | 1.007  | 0.3385  | 0.507 | -6.05 | -0.3063 | none |
| LPCAT1   | 0.123  | 0.1738  | 1.0068 | 0.33858 | 0.507 | -6.05 | 0.11841 | none |
| STON1-GT | 0.127  | 0.1268  | 1.0067 | 0.33862 | 0.507 | -6.05 | 1.24571 | none |
| CDC6     | 0.155  | 0.1858  | 1.0067 | 0.33865 | 0.507 | -6.05 | 0.50984 | none |
| FA2H     | -0.244 | -0.1082 | -1.007 | 0.33866 | 0.507 | -6.05 | 1.73456 | none |
| GOLGA7   | -0.14  | -0.1947 | -1.007 | 0.33867 | 0.507 | -6.05 | 1.30333 | none |
| HEYL     | -0.078 | -0.0467 | -1.007 | 0.33867 | 0.507 | -6.05 | 0.90179 | none |
| TUSC1    | -0.073 | -0.0661 | -1.006 | 0.3391  | 0.508 | -6.05 | 1.8667  | none |

|          |        |         |        |         |       |       |         |      |
|----------|--------|---------|--------|---------|-------|-------|---------|------|
| ZNF514   | 0.155  | 0.1228  | 1.0056 | 0.33914 | 0.508 | -6.05 | -0.2524 | none |
| RFPL2    | 0.084  | 0.0807  | 1.0055 | 0.33919 | 0.508 | -6.05 | -0.6256 | none |
| TTC31    | 0.11   | 0.1236  | 1.0054 | 0.33922 | 0.508 | -6.05 | 1.22381 | none |
| TTC33    | -0.177 | -0.2093 | -1.005 | 0.33923 | 0.508 | -6.05 | 1.27824 | none |
| TTC8     | 0.192  | 0.1962  | 1.0053 | 0.33927 | 0.508 | -6.05 | -0.3051 | none |
| NDUFC2-K | -1.413 | -1.1234 | -1.005 | 0.33932 | 0.508 | -6.05 | 2.04631 | none |
| TBX10    | 0.07   | 0.0713  | 1.0052 | 0.33934 | 0.508 | -6.05 | 0       | none |
| FKBP1C   | 0.091  | 0.1004  | 1.005  | 0.33944 | 0.508 | -6.05 | -0.4638 | none |
| LRFN4    | 0.125  | 0.0696  | 1.0049 | 0.33948 | 0.508 | -6.05 | 0.70321 | none |
| TCEAL9   | -0.168 | -0.087  | -1.005 | 0.33961 | 0.508 | -6.05 | 1.98692 | none |
| DYNC1LI2 | 0.116  | 0.1763  | 1.0045 | 0.33964 | 0.508 | -6.05 | 1.02691 | none |
| TMEM263  | 0.108  | -0.0029 | 1.0041 | 0.33985 | 0.509 | -6.05 | -0.2332 | none |
| GRIK1    | 0.086  | 0.0555  | 1.004  | 0.33986 | 0.509 | -6.05 | 0.08617 | none |
| CRYBA2   | 0.094  | 0.0664  | 1.0037 | 0.34    | 0.509 | -6.06 | 1.6563  | none |
| CERS2    | -0.119 | -0.1516 | -1.004 | 0.34002 | 0.509 | -6.06 | 0.91743 | none |
| TAS2R40  | -0.074 | -0.0634 | -1.004 | 0.34003 | 0.509 | -6.06 | 0       | none |
| GLI2     | 0.073  | 0.0807  | 1.0034 | 0.34015 | 0.509 | -6.06 | 1.31073 | none |
| ISL2     | -0.091 | -0.0865 | -1.003 | 0.34034 | 0.509 | -6.06 | 1.67951 | none |
| ASPRV1   | -0.094 | -0.0678 | -1.003 | 0.34034 | 0.509 | -6.06 | 0.46299 | none |
| CWF19L2  | 0.27   | 0.3217  | 1.0028 | 0.34041 | 0.509 | -6.06 | -0.4056 | none |
| HNRNPA1  | 0.131  | 0.1953  | 1.0028 | 0.34044 | 0.509 | -6.06 | 0.54655 | none |
| HSPA13   | 0.12   | 0.0057  | 1.0026 | 0.34054 | 0.509 | -6.06 | 0.08529 | none |
| RBM25    | 0.307  | 0.4423  | 1.0025 | 0.34056 | 0.509 | -6.06 | 0.19668 | none |
| FZD3     | 0.226  | 0.1094  | 1.0025 | 0.34057 | 0.509 | -6.06 | 0.3198  | none |
| TJP1     | 0.135  | 0.1501  | 1.0025 | 0.34058 | 0.509 | -6.06 | -0.6082 | none |
| ARF4     | -0.172 | -0.262  | -1.002 | 0.34067 | 0.509 | -6.06 | 0.76075 | none |
| ACTN4    | 0.344  | 0.4662  | 1.0022 | 0.34072 | 0.509 | -6.06 | 0.24171 | none |
| IGSF9    | -0.082 | -0.0651 | -1.002 | 0.34079 | 0.509 | -6.06 | 0.99267 | none |
| KIF1A    | 0.195  | 0.1573  | 1.0019 | 0.34086 | 0.509 | -6.06 | -0.668  | none |
| POLR2K   | -0.174 | -0.2525 | -1.002 | 0.3409  | 0.509 | -6.06 | 0.21078 | none |
| METTL5   | -0.112 | -0.1771 | -1.002 | 0.34093 | 0.509 | -6.06 | 0.63566 | none |
| DGKZ     | 0.167  | 0.1718  | 1.0017 | 0.34094 | 0.509 | -6.06 | -0.2041 | none |
| SLC35A5  | 0.182  | 0.0324  | 1.0015 | 0.34102 | 0.509 | -6.06 | 0.30551 | none |
| FOXI1    | 0.067  | 0.0672  | 1.0013 | 0.3411  | 0.509 | -6.06 | -0.0401 | none |
| RNF20    | 0.319  | 0.4287  | 1.0013 | 0.3411  | 0.509 | -6.06 | 0.03719 | none |
| LRRCC1   | 0.228  | 0.2998  | 1.0013 | 0.34113 | 0.509 | -6.06 | 0.58388 | none |
| PYCARD   | -0.207 | -0.286  | -1.001 | 0.34116 | 0.509 | -6.06 | 0.34611 | none |
| PPM1D    | 0.108  | 0.0676  | 1.0005 | 0.34148 | 0.51  | -6.06 | 0.67785 | none |
| GLUD1    | 0.119  | 0.1222  | 1.0003 | 0.34159 | 0.51  | -6.06 | 0.08558 | none |
| E2F7     | -0.151 | -0.0091 | -1     | 0.34161 | 0.51  | -6.06 | 1.56495 | none |

|           |        |         |        |         |       |       |         |      |
|-----------|--------|---------|--------|---------|-------|-------|---------|------|
| AP3S1     | -0.119 | -0.1726 | -1     | 0.34172 | 0.51  | -6.06 | 0.68519 | none |
| RASGRF2   | -0.098 | -0.0555 | -1     | 0.34188 | 0.51  | -6.06 | 1.15187 | none |
| TICRR     | 0.23   | 0.337   | 0.9995 | 0.34193 | 0.51  | -6.06 | -0.5478 | none |
| TTC27     | 0.1    | 0.0275  | 0.9995 | 0.34194 | 0.51  | -6.06 | -0.2834 | none |
| TSPY8     | -0.111 | -0.1114 | -0.999 | 0.34198 | 0.51  | -6.06 | 0.12942 | none |
| LMBRD1    | 0.144  | -0.0178 | 0.9993 | 0.34202 | 0.51  | -6.06 | 0.19731 | none |
| SLC7A8    | 0.183  | 0.1848  | 0.9993 | 0.34203 | 0.51  | -6.06 | 0.85799 | none |
| NENF      | -0.187 | -0.1806 | -0.999 | 0.34213 | 0.51  | -6.06 | -0.0302 | none |
| AMPD1     | 0.072  | 0.0733  | 0.999  | 0.34219 | 0.51  | -6.06 | 1.16625 | none |
| C19ORF67  | -0.109 | -0.0529 | -0.998 | 0.34255 | 0.511 | -6.06 | -0.3199 | none |
| SPINK8    | 0.115  | 0.1153  | 0.9979 | 0.3427  | 0.511 | -6.06 | 0.51333 | none |
| KCNK4     | -0.12  | -0.0803 | -0.998 | 0.34281 | 0.511 | -6.06 | 0.83625 | none |
| KRTAP12-2 | 0.115  | 0.1151  | 0.9973 | 0.34297 | 0.511 | -6.06 | -0.1375 | none |
| SPRED2    | 0.135  | 0.1428  | 0.9972 | 0.34298 | 0.511 | -6.06 | 0.06742 | none |
| GTSF1L    | 0.135  | 0.1174  | 0.9972 | 0.34298 | 0.511 | -6.06 | 0.17453 | none |
| VEGFB     | 0.132  | 0.1243  | 0.9969 | 0.34316 | 0.512 | -6.06 | 0.25496 | none |
| CYC1      | -0.161 | -0.1613 | -0.996 | 0.34339 | 0.512 | -6.06 | 0.64848 | none |
| SH3RF2    | 0.118  | 0.0792  | 0.9963 | 0.34342 | 0.512 | -6.06 | -0.0521 | none |
| WNT1      | 0.073  | 0.0494  | 0.9962 | 0.34344 | 0.512 | -6.06 | 0.00644 | none |
| TXLNG     | 0.242  | 0.3272  | 0.9962 | 0.34346 | 0.512 | -6.06 | 0.43209 | none |
| SPOUT1    | 0.125  | 0.172   | 0.9961 | 0.34353 | 0.512 | -6.06 | -0.568  | none |
| SMPDL3B   | 0.177  | 0.1437  | 0.9959 | 0.34359 | 0.512 | -6.06 | -0.756  | none |
| U2AF1     | 0.21   | 0.1821  | 0.9958 | 0.34365 | 0.512 | -6.06 | 0.24589 | none |
| PSORS1C2  | -0.07  | -0.0469 | -0.996 | 0.34371 | 0.512 | -6.06 | 0       | none |
| ARHGEF10  | -0.101 | -0.1013 | -0.996 | 0.34378 | 0.512 | -6.06 | -0.1743 | none |
| ADGRL1    | -0.174 | 0.0202  | -0.995 | 0.34379 | 0.512 | -6.06 | -0.0392 | none |
| DUSP5     | -0.116 | -0.1086 | -0.995 | 0.344   | 0.512 | -6.06 | -0.3764 | none |
| FSCN3     | -0.125 | -0.0523 | -0.995 | 0.34401 | 0.512 | -6.06 | 0.14825 | none |
| PTP4A1    | -0.132 | -0.1545 | -0.994 | 0.34436 | 0.513 | -6.06 | 1.18125 | none |
| UBXN4     | 0.171  | 0.2054  | 0.9936 | 0.34469 | 0.513 | -6.07 | 0.5248  | none |
| TSHZ3     | -0.095 | 0.0122  | -0.993 | 0.34484 | 0.513 | -6.07 | -0.3155 | none |
| HNRNPDL   | -0.101 | -0.0616 | -0.993 | 0.34488 | 0.513 | -6.07 | 1.8843  | none |
| NUTM2E    | -0.069 | -0.0507 | -0.993 | 0.34513 | 0.514 | -6.07 | 0.58425 | none |
| PLEKHN1   | -0.232 | -0.1197 | -0.992 | 0.34522 | 0.514 | -6.07 | 1.97458 | none |
| COL18A1   | 0.211  | 0.2689  | 0.9922 | 0.34531 | 0.514 | -6.07 | 0.26205 | none |
| CCDC188   | -0.069 | -0.0467 | -0.992 | 0.34534 | 0.514 | -6.07 | 0       | none |
| AIF1      | 0.35   | 0.2787  | 0.9921 | 0.34536 | 0.514 | -6.07 | -0.1773 | none |
| ACTRT3    | -0.12  | -0.0864 | -0.992 | 0.34544 | 0.514 | -6.07 | 1.05807 | none |
| CDH22     | -0.069 | -0.0567 | -0.992 | 0.34551 | 0.514 | -6.07 | -0.4876 | none |
| PAX5      | -0.253 | -0.1815 | -0.992 | 0.34557 | 0.514 | -6.07 | 0.24573 | none |

|          |        |         |        |         |       |       |         |      |
|----------|--------|---------|--------|---------|-------|-------|---------|------|
| SCGB1D1  | 0.113  | 0.1129  | 0.9916 | 0.34561 | 0.514 | -6.07 | -0.5846 | none |
| BBS12    | 0.116  | 0.0856  | 0.9915 | 0.34565 | 0.514 | -6.07 | 0.30907 | none |
| TRIP13   | 0.079  | 0.0618  | 0.991  | 0.34587 | 0.514 | -6.07 | 0.36485 | none |
| VWA5B2   | -0.132 | -0.1229 | -0.991 | 0.34602 | 0.515 | -6.07 | 0.72391 | none |
| ZSWIM4   | 0.146  | 0.2252  | 0.9906 | 0.34607 | 0.515 | -6.07 | 0.17181 | none |
| DNAAF3   | -0.123 | -0.0855 | -0.991 | 0.34608 | 0.515 | -6.07 | 0.26112 | none |
| OS9      | 0.197  | 0.2703  | 0.9901 | 0.34631 | 0.515 | -6.07 | -0.1961 | none |
| CCDC70   | 0.136  | 0.122   | 0.99   | 0.34632 | 0.515 | -6.07 | 0.52546 | none |
| KCNV2    | -0.077 | -0.0392 | -0.99  | 0.34635 | 0.515 | -6.07 | 1.36394 | none |
| S100G    | 0.112  | 0.1122  | 0.9898 | 0.34643 | 0.515 | -6.07 | 0.38115 | none |
| ACOT6    | -0.113 | -0.0557 | -0.989 | 0.34661 | 0.515 | -6.07 | 0.92929 | none |
| DSE      | 0.144  | 0.1341  | 0.9891 | 0.34675 | 0.515 | -6.07 | -0.931  | none |
| ARHGAP24 | 0.08   | 0.0809  | 0.9891 | 0.34676 | 0.515 | -6.07 | 0.32509 | none |
| PPFIA2   | 0.094  | 0.0942  | 0.989  | 0.34679 | 0.515 | -6.07 | 1.66596 | none |
| BCO1     | 0.077  | 0.0781  | 0.989  | 0.34679 | 0.515 | -6.07 | -0.8465 | none |
| LCN2     | -0.108 | -0.1077 | -0.989 | 0.34682 | 0.515 | -6.07 | 0.93889 | none |
| C2       | 0.147  | 0.0683  | 0.9886 | 0.34696 | 0.515 | -6.07 | -0.8743 | none |
| TPTE2    | 0.09   | 0.0787  | 0.9885 | 0.34705 | 0.516 | -6.07 | -1.0165 | none |
| CBX8     | 0.193  | 0.2271  | 0.9882 | 0.34717 | 0.516 | -6.07 | -0.6615 | none |
| SYS1     | -0.205 | -0.2116 | -0.988 | 0.34725 | 0.516 | -6.07 | 1.02799 | none |
| TAF15    | 0.318  | 0.4576  | 0.9879 | 0.3473  | 0.516 | -6.07 | -0.1179 | none |
| ECM2     | 0.14   | 0.1007  | 0.9876 | 0.34743 | 0.516 | -6.07 | -0.1255 | none |
| CHL1     | 0.108  | 0.1121  | 0.9876 | 0.34745 | 0.516 | -6.07 | 1.15842 | none |
| KRT78    | -0.124 | -0.1141 | -0.987 | 0.34754 | 0.516 | -6.07 | 1.63323 | none |
| MYOC     | -0.074 | -0.0677 | -0.987 | 0.34761 | 0.516 | -6.07 | 1.12074 | none |
| MAMSTR   | -0.131 | -0.0995 | -0.987 | 0.34764 | 0.516 | -6.07 | 1.93831 | none |
| PIGS     | 0.114  | 0.0285  | 0.9869 | 0.34778 | 0.516 | -6.07 | -0.1952 | none |
| CHST8    | 0.068  | 0.0683  | 0.9867 | 0.34786 | 0.516 | -6.07 | 0.5601  | none |
| STXBP1   | -0.164 | -0.0482 | -0.987 | 0.34787 | 0.516 | -6.07 | 1.38006 | none |
| C9       | 0.084  | 0.0841  | 0.9865 | 0.34795 | 0.516 | -6.07 | 1.06079 | none |
| RBM27    | 0.234  | 0.3059  | 0.9864 | 0.34802 | 0.516 | -6.07 | 0.24328 | none |
| NUTM2F   | 0.077  | 0.0542  | 0.9861 | 0.34816 | 0.517 | -6.07 | 0.35145 | none |
| DEFB110  | 0.111  | 0.1109  | 0.986  | 0.34819 | 0.517 | -6.07 | 1.19688 | none |
| SH3PXD2B | 0.067  | 0.0714  | 0.9859 | 0.34823 | 0.517 | -6.07 | -0.8862 | none |
| CUL3     | 0.25   | 0.3086  | 0.9856 | 0.34839 | 0.517 | -6.07 | 0.12287 | none |
| IGFBP5   | -0.085 | -0.0889 | -0.985 | 0.34852 | 0.517 | -6.07 | 1.97304 | none |
| RASSF5   | 0.157  | 0.2194  | 0.9852 | 0.34855 | 0.517 | -6.07 | 0.90268 | none |
| SP140    | 0.15   | 0.2038  | 0.9852 | 0.34858 | 0.517 | -6.07 | -0.1612 | none |
| DRG1     | -0.11  | -0.1414 | -0.985 | 0.34874 | 0.517 | -6.07 | 0.9055  | none |
| SLC37A4  | 0.16   | 0.0704  | 0.9848 | 0.34875 | 0.517 | -6.07 | 0.30667 | none |



|          |        |         |        |         |       |       |         |      |
|----------|--------|---------|--------|---------|-------|-------|---------|------|
| COL5A1   | 0.114  | 0.1401  | 0.9844 | 0.34894 | 0.517 | -6.07 | 0.0189  | none |
| ARHGEF6  | 0.201  | 0.2259  | 0.9843 | 0.34899 | 0.517 | -6.07 | 0.1517  | none |
| FCRLA    | 0.076  | 0.0848  | 0.9839 | 0.34919 | 0.518 | -6.07 | 0.36921 | none |
| LRRTM3   | -0.117 | -0.1174 | -0.984 | 0.34927 | 0.518 | -6.07 | 0.43974 | none |
| ALDH18A1 | -0.169 | -0.0738 | -0.984 | 0.34929 | 0.518 | -6.07 | 1.58638 | none |
| PIK3C2G  | 0.126  | 0.1321  | 0.9835 | 0.34934 | 0.518 | -6.07 | 0.98959 | none |
| CCT6A    | -0.099 | -0.0664 | -0.983 | 0.34936 | 0.518 | -6.07 | 1.88172 | none |
| RAB8A    | 0.179  | 0.25    | 0.9833 | 0.34948 | 0.518 | -6.08 | -0.0176 | none |
| ARL6IP5  | 0.11   | 0.0392  | 0.9829 | 0.34963 | 0.518 | -6.08 | -0.268  | none |
| BORCS6   | -0.078 | -0.0857 | -0.983 | 0.34965 | 0.518 | -6.08 | 1.0152  | none |
| GREB1L   | 0.123  | 0.135   | 0.9828 | 0.3497  | 0.518 | -6.08 | -0.7429 | none |
| PATE4    | 0.072  | 0.0551  | 0.9827 | 0.34975 | 0.518 | -6.08 | 0.55179 | none |
| LRRC4C   | 0.209  | 0.1121  | 0.9826 | 0.3498  | 0.518 | -6.08 | -0.2293 | none |
| ZRANB2   | 0.1    | 0.1024  | 0.9824 | 0.34987 | 0.518 | -6.08 | 1.17112 | none |
| TRERF1   | 0.129  | 0.1866  | 0.9824 | 0.3499  | 0.518 | -6.08 | -0.5199 | none |
| LYG1     | 0.114  | 0.0554  | 0.9823 | 0.34992 | 0.518 | -6.08 | 0.83335 | none |
| YRDC     | -0.156 | -0.1503 | -0.982 | 0.34997 | 0.518 | -6.08 | 0.15771 | none |
| SOCS5    | 0.094  | 0.0564  | 0.982  | 0.35006 | 0.518 | -6.08 | -1.1653 | none |
| AP5M1    | 0.188  | 0.0678  | 0.982  | 0.35007 | 0.518 | -6.08 | 0.54057 | none |
| MT1A     | -0.119 | -0.1202 | -0.982 | 0.3503  | 0.518 | -6.08 | 0.08613 | none |
| RAB25    | 0.276  | 0.1804  | 0.9814 | 0.35035 | 0.518 | -6.08 | -0.5593 | none |
| PGC      | -0.253 | -0.1717 | -0.981 | 0.35042 | 0.519 | -6.08 | 0.45535 | none |
| ACSBG1   | 0.323  | 0.4276  | 0.9811 | 0.35049 | 0.519 | -6.08 | 0.41208 | none |
| ILK      | -0.091 | -0.0872 | -0.981 | 0.35058 | 0.519 | -6.08 | 0.64563 | none |
| KRT18    | 0.17   | 0.1448  | 0.9805 | 0.35077 | 0.519 | -6.08 | -0.7479 | none |
| FEM1C    | 0.093  | 0.0447  | 0.9803 | 0.35086 | 0.519 | -6.08 | 0.83461 | none |
| MINK1    | 0.258  | 0.359   | 0.9803 | 0.35088 | 0.519 | -6.08 | -0.1117 | none |
| C12ORF42 | 0.346  | 0.2355  | 0.9802 | 0.3509  | 0.519 | -6.08 | 0.29562 | none |
| OR14I1   | 0.069  | 0.0689  | 0.9802 | 0.3509  | 0.519 | -6.08 | 0.60476 | none |
| NRGN     | 0.108  | 0.1388  | 0.9801 | 0.35095 | 0.519 | -6.08 | 0.91475 | none |
| ZNF507   | 0.209  | 0.2888  | 0.98   | 0.35099 | 0.519 | -6.08 | -0.1064 | none |
| PPIC     | 0.071  | 0.0516  | 0.98   | 0.35102 | 0.519 | -6.08 | 0.07846 | none |
| ZNF683   | 0.311  | 0.1771  | 0.9799 | 0.35103 | 0.519 | -6.08 | -0.1749 | none |
| CRABP1   | -0.091 | -0.0971 | -0.98  | 0.35108 | 0.519 | -6.08 | 1.99808 | none |
| GFRA3    | 0.068  | 0.0713  | 0.9798 | 0.35109 | 0.519 | -6.08 | -0.291  | none |
| FTMT     | 0.069  | 0.0685  | 0.9797 | 0.35113 | 0.519 | -6.08 | -0.8746 | none |
| FAM120A  | 0.215  | 0.292   | 0.9797 | 0.35116 | 0.519 | -6.08 | -0.1738 | none |
| SLC38A2  | -0.098 | -0.1632 | -0.98  | 0.35116 | 0.519 | -6.08 | 0.6388  | none |
| PNN      | 0.274  | 0.4287  | 0.9796 | 0.35119 | 0.519 | -6.08 | 0.3455  | none |
| PRR13    | -0.098 | -0.1315 | -0.979 | 0.35126 | 0.519 | -6.08 | 0.70301 | none |

|           |        |         |        |         |       |       |         |      |
|-----------|--------|---------|--------|---------|-------|-------|---------|------|
| GPHB5     | 0.109  | 0.1085  | 0.9794 | 0.3513  | 0.519 | -6.08 | 1.19688 | none |
| UBE2J1    | -0.078 | -0.0664 | -0.979 | 0.35142 | 0.519 | -6.08 | 0.99225 | none |
| DLX1      | 0.086  | 0.0846  | 0.9789 | 0.35154 | 0.519 | -6.08 | -0.5588 | none |
| XAGE1A    | 0.108  | 0.1082  | 0.9785 | 0.35172 | 0.519 | -6.08 | -0.7569 | none |
| CDHR5     | -0.072 | -0.0451 | -0.978 | 0.35183 | 0.52  | -6.08 | 0.94955 | none |
| POP4      | -0.109 | -0.0882 | -0.978 | 0.35195 | 0.52  | -6.08 | 1.63879 | none |
| KCNIP4    | -0.088 | -0.0729 | -0.978 | 0.35197 | 0.52  | -6.08 | 1.16316 | none |
| PCBP4     | 0.217  | 0.2561  | 0.9775 | 0.35218 | 0.52  | -6.08 | 0.33577 | none |
| MIEN1     | -0.149 | -0.1877 | -0.977 | 0.35228 | 0.52  | -6.08 | 1.22792 | none |
| FUCA2     | -0.11  | -0.1421 | -0.977 | 0.35231 | 0.52  | -6.08 | 0.15935 | none |
| GLS2      | -0.153 | -0.0817 | -0.977 | 0.3526  | 0.52  | -6.08 | 1.12991 | none |
| C11ORF40  | -0.083 | -0.0892 | -0.976 | 0.35287 | 0.521 | -6.08 | 1.79234 | none |
| HIST1H2AI | 0.175  | 0.082   | 0.9757 | 0.35302 | 0.521 | -6.08 | 1.1358  | none |
| EIF5B     | 0.359  | 0.5285  | 0.9756 | 0.35305 | 0.521 | -6.08 | -0.0221 | none |
| PKIA      | 0.13   | 0.1066  | 0.9756 | 0.35305 | 0.521 | -6.08 | 1.11434 | none |
| HAAO      | 0.123  | 0.1143  | 0.9756 | 0.35307 | 0.521 | -6.08 | -0.2546 | none |
| SEMA6C    | 0.103  | 0.1329  | 0.9751 | 0.35332 | 0.521 | -6.08 | -0.3831 | none |
| KCTD14    | -0.082 | -0.1003 | -0.975 | 0.35351 | 0.521 | -6.08 | 0.04134 | none |
| POR       | 0.222  | 0.1938  | 0.9745 | 0.35358 | 0.521 | -6.08 | -0.357  | none |
| NOMO2     | -0.16  | -0.0495 | -0.974 | 0.35375 | 0.522 | -6.08 | 0.46203 | none |
| LIMA1     | 0.295  | 0.3512  | 0.9741 | 0.35379 | 0.522 | -6.08 | 0.29265 | none |
| OSTN      | 0.107  | 0.1067  | 0.9739 | 0.35386 | 0.522 | -6.08 | -0.714  | none |
| AGT       | -0.094 | -0.1073 | -0.974 | 0.35404 | 0.522 | -6.08 | 1.11903 | none |
| RIT2      | 0.071  | 0.0914  | 0.9732 | 0.35423 | 0.522 | -6.08 | 0.79603 | none |
| SERINC1   | 0.12   | -0.0076 | 0.9731 | 0.35427 | 0.522 | -6.08 | -0.1371 | none |
| THTPA     | 0.12   | 0.0536  | 0.973  | 0.35429 | 0.522 | -6.08 | 0.73997 | none |
| NT5DC2    | 0.143  | 0.1834  | 0.9727 | 0.35443 | 0.522 | -6.09 | -0.2123 | none |
| LILRA4    | 0.106  | 0.1062  | 0.9726 | 0.35447 | 0.522 | -6.09 | -0.3748 | none |
| CCSER2    | 0.231  | 0.3188  | 0.9726 | 0.35448 | 0.522 | -6.09 | 0.86103 | none |
| OR4B1     | 0.106  | 0.1062  | 0.9725 | 0.35452 | 0.522 | -6.09 | 0.861   | none |
| RBMX2     | 0.116  | 0.1466  | 0.9721 | 0.35472 | 0.523 | -6.09 | 1.01719 | none |
| NPSR1     | -0.071 | -0.0633 | -0.972 | 0.35477 | 0.523 | -6.09 | -0.6262 | none |
| ATP6V1D   | 0.129  | 0.0486  | 0.972  | 0.35477 | 0.523 | -6.09 | -0.4436 | none |
| SBDS      | 0.08   | 0.0925  | 0.9717 | 0.35493 | 0.523 | -6.09 | 0.86417 | none |
| ALG3      | -0.116 | -0.1067 | -0.972 | 0.35493 | 0.523 | -6.09 | 0.77049 | none |
| BLNK      | -0.071 | -0.0689 | -0.972 | 0.35494 | 0.523 | -6.09 | 1.90337 | none |
| IFITM5    | -0.119 | -0.1167 | -0.971 | 0.3553  | 0.523 | -6.09 | 1.82983 | none |
| CXORF67   | -0.071 | -0.0411 | -0.971 | 0.35531 | 0.523 | -6.09 | 1.65861 | none |
| GPR62     | -0.067 | -0.0593 | -0.971 | 0.35532 | 0.523 | -6.09 | 0       | none |
| MTRNR2L1  | -0.084 | -0.1068 | -0.971 | 0.35537 | 0.523 | -6.09 | 0.9992  | none |

|          |        |         |        |         |       |       |         |      |
|----------|--------|---------|--------|---------|-------|-------|---------|------|
| COX7A2   | -0.143 | -0.2211 | -0.971 | 0.35545 | 0.523 | -6.09 | 0.24967 | none |
| TCP11    | 0.111  | 0.1231  | 0.9705 | 0.3555  | 0.523 | -6.09 | 0.76994 | none |
| TNFSF12  | 0.276  | 0.0944  | 0.9703 | 0.35559 | 0.523 | -6.09 | -0.4952 | none |
| ZNF222   | -0.13  | -0.0789 | -0.97  | 0.35565 | 0.523 | -6.09 | 1.91062 | none |
| AMDHD2   | 0.185  | 0.0924  | 0.9698 | 0.3558  | 0.524 | -6.09 | -0.1844 | none |
| COL22A1  | 0.105  | 0.1053  | 0.9698 | 0.3558  | 0.524 | -6.09 | -0.8743 | none |
| GIMAP4   | -0.123 | -0.1413 | -0.97  | 0.35581 | 0.524 | -6.09 | 0.57354 | none |
| FERMT1   | 0.112  | 0.1233  | 0.9687 | 0.35635 | 0.524 | -6.09 | -0.8655 | none |
| OXGR1    | -0.071 | -0.0709 | -0.968 | 0.35645 | 0.524 | -6.09 | 1.38879 | none |
| ZFAT     | 0.177  | 0.2318  | 0.968  | 0.35667 | 0.525 | -6.09 | -0.2391 | none |
| AC145212 | 0.135  | 0.1565  | 0.9678 | 0.35678 | 0.525 | -6.09 | -0.1623 | none |
| TTC24    | 0.192  | 0.1716  | 0.9674 | 0.35695 | 0.525 | -6.09 | -0.2149 | none |
| MCAT     | 0.088  | 0.1214  | 0.9674 | 0.35696 | 0.525 | -6.09 | 1.32267 | none |
| CEP295NL | -0.144 | -0.0904 | -0.967 | 0.357   | 0.525 | -6.09 | 1.59751 | none |
| PDLIM2   | 0.127  | 0.0805  | 0.967  | 0.35714 | 0.525 | -6.09 | -0.0113 | none |
| FBXO21   | 0.157  | 0.1321  | 0.9667 | 0.3573  | 0.525 | -6.09 | 0.39725 | none |
| SMIM13   | 0.14   | 0.0664  | 0.9665 | 0.35737 | 0.525 | -6.09 | -0.0589 | none |
| JMJD7    | -0.318 | -0.2655 | -0.966 | 0.35749 | 0.525 | -6.09 | 0.9203  | none |
| HPS1     | 0.117  | 0.0753  | 0.9659 | 0.35766 | 0.526 | -6.09 | 0.90776 | none |
| COQ7     | 0.138  | 0.0776  | 0.9658 | 0.35771 | 0.526 | -6.09 | -0.2757 | none |
| FAM122A  | 0.092  | 0.0255  | 0.9656 | 0.35782 | 0.526 | -6.09 | 0.40998 | none |
| HYAL3    | -0.188 | -0.1282 | -0.965 | 0.35808 | 0.526 | -6.09 | 1.60398 | none |
| NAB2     | 0.1    | 0.1231  | 0.9649 | 0.35814 | 0.526 | -6.09 | 1.05044 | none |
| HMOX2    | 0.119  | 0.1496  | 0.9647 | 0.35822 | 0.526 | -6.09 | -0.1149 | none |
| SLC7A6OS | 0.216  | 0.1957  | 0.9641 | 0.35852 | 0.527 | -6.09 | 0.58487 | none |
| NBEA     | 0.073  | 0.052   | 0.9641 | 0.35853 | 0.527 | -6.09 | -1.0415 | none |
| YIPF2    | 0.165  | 0.0953  | 0.964  | 0.35855 | 0.527 | -6.09 | -0.7065 | none |
| NFE2L1   | 0.3    | 0.4024  | 0.964  | 0.35857 | 0.527 | -6.09 | 0.71314 | none |
| BOLA1    | 0.157  | 0.0783  | 0.9635 | 0.35883 | 0.527 | -6.09 | 0.23558 | none |
| MRPS24   | -0.156 | -0.1797 | -0.963 | 0.35884 | 0.527 | -6.09 | 0.76265 | none |
| FIG4     | -0.14  | -0.1577 | -0.963 | 0.35895 | 0.527 | -6.09 | 0.59777 | none |
| TNPO2    | 0.159  | 0.2769  | 0.9631 | 0.359   | 0.527 | -6.09 | -0.4243 | none |
| NPTXR    | 0.09   | 0.0802  | 0.9628 | 0.35912 | 0.527 | -6.09 | -0.5491 | none |
| SLAMF8   | -0.146 | -0.1769 | -0.963 | 0.35918 | 0.527 | -6.09 | 1.49394 | none |
| RNF13    | -0.209 | -0.2339 | -0.963 | 0.35921 | 0.527 | -6.09 | 1.32105 | none |
| RBBP6    | -0.156 | -0.1025 | -0.962 | 0.35946 | 0.528 | -6.1  | 1.00855 | none |
| POLR2C   | 0.149  | 0.0283  | 0.9621 | 0.35946 | 0.528 | -6.1  | 0.2095  | none |
| NUDT11   | -0.134 | -0.1493 | -0.962 | 0.35953 | 0.528 | -6.1  | 1.42214 | none |
| ADGRF3   | 0.231  | 0.2393  | 0.9619 | 0.35957 | 0.528 | -6.1  | 0.10194 | none |
| SLK      | 0.242  | 0.4454  | 0.9619 | 0.35958 | 0.528 | -6.1  | 0.39528 | none |

|          |        |         |        |         |       |      |         |      |
|----------|--------|---------|--------|---------|-------|------|---------|------|
| RBFA     | -0.089 | -0.069  | -0.962 | 0.35968 | 0.528 | -6.1 | 1.76154 | none |
| C9ORF116 | -0.231 | -0.162  | -0.962 | 0.35968 | 0.528 | -6.1 | 0.6458  | none |
| NOXRED1  | -0.1   | -0.0835 | -0.961 | 0.35979 | 0.528 | -6.1 | 0.01936 | none |
| EME1     | -0.239 | -0.0364 | -0.961 | 0.35979 | 0.528 | -6.1 | 1.4751  | none |
| CXORF51B | 0.103  | 0.1026  | 0.9613 | 0.35988 | 0.528 | -6.1 | 0.66005 | none |
| LRRC63   | 0.076  | 0.08    | 0.9611 | 0.35994 | 0.528 | -6.1 | 1.3432  | none |
| FBXO33   | 0.082  | 0.032   | 0.9611 | 0.35996 | 0.528 | -6.1 | 0.8386  | none |
| OR5B3    | -0.066 | -0.047  | -0.961 | 0.36    | 0.528 | -6.1 | 0       | none |
| TMEM14C  | -0.144 | -0.2121 | -0.961 | 0.36002 | 0.528 | -6.1 | 0.63522 | none |
| SELL     | -0.107 | -0.1164 | -0.961 | 0.36003 | 0.528 | -6.1 | 1.69334 | none |
| WFDC10A  | 0.102  | 0.1025  | 0.9608 | 0.36008 | 0.528 | -6.1 | 0.44852 | none |
| ASB4     | 0.074  | 0.0841  | 0.9604 | 0.36026 | 0.528 | -6.1 | -0.4354 | none |
| CITED1   | 0.268  | 0.088   | 0.96   | 0.36046 | 0.528 | -6.1 | -0.2395 | none |
| RNF151   | 0.195  | 0.1486  | 0.9599 | 0.36055 | 0.528 | -6.1 | -1.0507 | none |
| GAST     | -0.099 | -0.0986 | -0.96  | 0.36063 | 0.528 | -6.1 | -0.2316 | none |
| RNF212B  | -0.171 | -0.0984 | -0.96  | 0.36069 | 0.528 | -6.1 | 1.17209 | none |
| TAS2R19  | -0.08  | -0.0452 | -0.959 | 0.36099 | 0.529 | -6.1 | 0.68906 | none |
| ERLEC1   | 0.147  | 0.1261  | 0.9587 | 0.36109 | 0.529 | -6.1 | -0.6641 | none |
| GAS8     | 0.262  | 0.2641  | 0.9587 | 0.36109 | 0.529 | -6.1 | 0.16708 | none |
| FANCM    | 0.211  | 0.2309  | 0.9585 | 0.3612  | 0.529 | -6.1 | -0.5681 | none |
| RMI1     | -0.094 | -0.1327 | -0.958 | 0.36126 | 0.529 | -6.1 | 0.96889 | none |
| TAGLN3   | -0.105 | -0.1137 | -0.958 | 0.36127 | 0.529 | -6.1 | -0.6876 | none |
| MFRP     | -0.123 | -0.0793 | -0.958 | 0.36134 | 0.529 | -6.1 | 0.00804 | none |
| RAD51AP1 | -0.13  | -0.1114 | -0.958 | 0.3614  | 0.529 | -6.1 | 0.24235 | none |
| ICE1     | 0.256  | 0.3607  | 0.958  | 0.36142 | 0.529 | -6.1 | 0.24872 | none |
| ANKRD6   | -0.157 | -0.0772 | -0.958 | 0.3616  | 0.529 | -6.1 | 0.81832 | none |
| ITGB1BP2 | -0.161 | -0.0426 | -0.958 | 0.36163 | 0.529 | -6.1 | 1.38224 | none |
| MNX1     | 0.136  | 0.2089  | 0.9576 | 0.36164 | 0.529 | -6.1 | 0.74043 | none |
| HMGCS2   | 0.135  | 0.1175  | 0.9576 | 0.36165 | 0.529 | -6.1 | 0.49376 | none |
| IFT43    | -0.174 | -0.1073 | -0.957 | 0.36176 | 0.529 | -6.1 | 0.9846  | none |
| ZNF330   | -0.116 | -0.1457 | -0.957 | 0.36178 | 0.529 | -6.1 | 1.29873 | none |
| SCYL2    | 0.122  | 0.0969  | 0.9572 | 0.36183 | 0.529 | -6.1 | 0.70617 | none |
| CUL4B    | 0.146  | 0.1611  | 0.9572 | 0.36183 | 0.529 | -6.1 | 0.55831 | none |
| AGO1     | 0.153  | 0.2046  | 0.9569 | 0.36197 | 0.529 | -6.1 | -0.7447 | none |
| SPRR4    | 0.101  | 0.1012  | 0.9567 | 0.36206 | 0.53  | -6.1 | -0.4    | none |
| PITX2    | 0.073  | 0.0669  | 0.9563 | 0.36224 | 0.53  | -6.1 | -0.7671 | none |
| COL12A1  | -0.08  | -0.0418 | -0.956 | 0.36234 | 0.53  | -6.1 | 0.3882  | none |
| ANKRD24  | -0.076 | -0.0286 | -0.956 | 0.3624  | 0.53  | -6.1 | 1.4464  | none |
| CNTRL    | 0.17   | 0.297   | 0.9559 | 0.36242 | 0.53  | -6.1 | 0.12119 | none |
| PLPP4    | 0.121  | 0.1181  | 0.9559 | 0.36244 | 0.53  | -6.1 | 1.18623 | none |

|          |        |         |        |         |       |       |         |      |
|----------|--------|---------|--------|---------|-------|-------|---------|------|
| PLCD4    | 0.264  | 0.3388  | 0.9558 | 0.3625  | 0.53  | -6.1  | 0.06877 | none |
| AKT1     | 0.126  | 0.1372  | 0.9558 | 0.36251 | 0.53  | -6.1  | -0.0941 | none |
| ACP5     | -0.179 | -0.1792 | -0.956 | 0.36255 | 0.53  | -6.1  | 1.64971 | none |
| TPPP2    | -0.097 | -0.0974 | -0.955 | 0.36274 | 0.53  | -6.1  | 0.79493 | none |
| SYCP2    | 0.139  | 0.0715  | 0.9552 | 0.36279 | 0.53  | -6.1  | -0.5016 | none |
| NOXO1    | 0.182  | 0.1685  | 0.955  | 0.36288 | 0.53  | -6.1  | 0.95464 | none |
| TEKT3    | 0.231  | 0.1922  | 0.9546 | 0.36305 | 0.53  | -6.1  | 0.72399 | none |
| CMC4     | 0.218  | 0.1479  | 0.9545 | 0.36314 | 0.531 | -6.1  | 0.61117 | none |
| KLF11    | -0.066 | -0.0154 | -0.954 | 0.36317 | 0.531 | -6.1  | 0.58261 | none |
| TPM2     | 0.194  | 0.1314  | 0.9543 | 0.36322 | 0.531 | -6.1  | -0.8337 | none |
| AQP2     | 0.079  | 0.083   | 0.9543 | 0.36323 | 0.531 | -6.1  | 0.36474 | none |
| TFAP2A   | 0.096  | 0.113   | 0.9541 | 0.36332 | 0.531 | -6.1  | 0.92157 | none |
| ATG4A    | -0.134 | -0.112  | -0.954 | 0.36335 | 0.531 | -6.1  | 1.97407 | none |
| TMEM102  | -0.087 | -0.0577 | -0.954 | 0.36335 | 0.531 | -6.1  | 1.01121 | none |
| TMPRSS5  | 0.136  | 0.156   | 0.9533 | 0.3637  | 0.531 | -6.1  | 1.55781 | none |
| HSPH1    | 0.343  | 0.5105  | 0.9532 | 0.36373 | 0.531 | -6.1  | 0.61306 | none |
| ZNF865   | 0.13   | 0.2099  | 0.953  | 0.36383 | 0.531 | -6.1  | -0.2756 | none |
| SPINK7   | -0.066 | -0.0443 | -0.953 | 0.36394 | 0.531 | -6.1  | -0.6074 | none |
| RAB18    | -0.144 | -0.1919 | -0.953 | 0.36398 | 0.531 | -6.1  | 1.53765 | none |
| OR13J1   | -0.065 | -0.0509 | -0.953 | 0.36404 | 0.531 | -6.1  | 0.12838 | none |
| CUX2     | 0.085  | 0.0964  | 0.9524 | 0.36412 | 0.531 | -6.1  | -0.2278 | none |
| SPARCL1  | 0.069  | 0.0863  | 0.9524 | 0.36412 | 0.531 | -6.1  | -0.3358 | none |
| C4ORF47  | -0.132 | -0.1542 | -0.952 | 0.36417 | 0.531 | -6.1  | 1.20884 | none |
| GRIK3    | 0.105  | 0.1084  | 0.9522 | 0.36422 | 0.531 | -6.1  | -0.4514 | none |
| FTSJ3    | 0.248  | 0.3852  | 0.9521 | 0.36427 | 0.531 | -6.1  | 0.23759 | none |
| TNFSF13B | -0.174 | -0.1116 | -0.952 | 0.36434 | 0.531 | -6.1  | 1.25253 | none |
| CPNE2    | 0.11   | 0.0554  | 0.9518 | 0.36441 | 0.532 | -6.1  | 1.393   | none |
| MSH5-SAP | 0.075  | 0.0853  | 0.9515 | 0.36458 | 0.532 | -6.11 | 0.78767 | none |
| LRRK2    | 0.135  | 0.1346  | 0.951  | 0.36481 | 0.532 | -6.11 | 1.21341 | none |
| RTN4RL1  | 0.082  | 0.0674  | 0.9506 | 0.36497 | 0.532 | -6.11 | -0.5447 | none |
| SYTL3    | -0.157 | -0.0546 | -0.951 | 0.365   | 0.532 | -6.11 | 1.35389 | none |
| RANGRF   | -0.175 | -0.2005 | -0.951 | 0.36501 | 0.532 | -6.11 | 0.96847 | none |
| SCAF4    | 0.279  | 0.4163  | 0.9505 | 0.36505 | 0.532 | -6.11 | 0.79817 | none |
| GPR107   | 0.081  | 0.1206  | 0.9496 | 0.36547 | 0.533 | -6.11 | 0.77381 | none |
| PPP2R2A  | 0.103  | 0.1026  | 0.9494 | 0.36558 | 0.533 | -6.11 | 0.00194 | none |
| EIF5     | 0.144  | 0.2126  | 0.9493 | 0.36561 | 0.533 | -6.11 | -0.1389 | none |
| VPS16    | 0.107  | 0.1678  | 0.9491 | 0.36573 | 0.533 | -6.11 | 0.84428 | none |
| EXO5     | -0.099 | -0.1685 | -0.949 | 0.3658  | 0.533 | -6.11 | -0.6852 | none |
| GPR17    | 0.116  | 0.116   | 0.9485 | 0.36599 | 0.533 | -6.11 | 1.01342 | none |
| MAGEE1   | 0.112  | 0.1189  | 0.9483 | 0.36612 | 0.533 | -6.11 | -0.1542 | none |

|           |        |         |        |         |       |       |         |            |
|-----------|--------|---------|--------|---------|-------|-------|---------|------------|
| MT-ND3    | -0.148 | -0.1861 | -0.948 | 0.36623 | 0.534 | -6.11 | 0.69041 | none       |
| TSPO      | -0.136 | -0.1451 | -0.947 | 0.36667 | 0.534 | -6.11 | 0.88127 | none       |
| STPG3     | -0.123 | -0.1035 | -0.947 | 0.36668 | 0.534 | -6.11 | 1.64791 | none       |
| MTDH      | 0.241  | 0.3264  | 0.9466 | 0.36693 | 0.534 | -6.11 | 0.53604 | none       |
| CYP39A1   | 0.082  | 0.0812  | 0.9466 | 0.36694 | 0.534 | -6.11 | 0.74491 | none       |
| MRPL3     | -0.093 | -0.1336 | -0.946 | 0.36708 | 0.535 | -6.11 | 1.12175 | none       |
| RABGGTB   | -0.123 | -0.1908 | -0.946 | 0.36709 | 0.535 | -6.11 | 0.23467 | none       |
| CPOX      | -0.173 | -0.1339 | -0.946 | 0.36715 | 0.535 | -6.11 | 1.02009 | none       |
| HOXB6     | 0.079  | 0.0571  | 0.946  | 0.36721 | 0.535 | -6.11 | 0.35788 | none       |
| SIGMAR1   | 0.096  | 0.0768  | 0.9459 | 0.36725 | 0.535 | -6.11 | 0.61041 | none       |
| NCAPD3    | 0.192  | 0.2811  | 0.9459 | 0.36726 | 0.535 | -6.11 | 0.95982 | none       |
| DCT       | -0.06  | -0.0343 | -0.946 | 0.36735 | 0.535 | -6.11 | 0       | none       |
| PAGR1     | -0.073 | -0.0882 | -0.946 | 0.36745 | 0.535 | -6.11 | 1.47899 | none       |
| KIAA1147  | 0.126  | 0.1641  | 0.9452 | 0.36759 | 0.535 | -6.11 | 0.24487 | none       |
| STS       | 0.093  | 0.1166  | 0.9451 | 0.36766 | 0.535 | -6.11 | 0.19953 | none       |
| ARPP21    | -0.182 | -0.0756 | -0.945 | 0.36786 | 0.535 | -6.11 | 0.41796 | none       |
| GALK1     | -0.168 | -0.189  | -0.944 | 0.36798 | 0.535 | -6.11 | 0.80055 | none       |
| KIAA0556  | 0.209  | 0.2109  | 0.9443 | 0.36804 | 0.535 | -6.11 | -0.8035 | none       |
| GAMT      | -0.115 | -0.1407 | -0.944 | 0.36823 | 0.536 | -6.11 | 0.71002 | none       |
| PSG2      | 0.308  | 0.261   | 0.9439 | 0.36824 | 0.536 | -6.11 | 0.62269 | none       |
| PLCL2     | 0.147  | 0.2018  | 0.9438 | 0.36829 | 0.536 | -6.11 | 0.22687 | none       |
| FLOT2     | -0.12  | -0.1321 | -0.944 | 0.36835 | 0.536 | -6.11 | 1.68054 | none       |
| TACC3     | 0.227  | 0.3297  | 0.9434 | 0.36847 | 0.536 | -6.11 | -0.0164 | none       |
| CCL3      | -0.526 | -0.1277 | -0.943 | 0.36859 | 0.536 | -6.11 | 0.65427 | none       |
| FBXO28    | 0.118  | 0.1116  | 0.9432 | 0.36859 | 0.536 | -6.11 | -0.118  | none       |
| EEF2K     | -0.249 | -0.1392 | -0.943 | 0.36869 | 0.536 | -6.11 | -0.6134 | none       |
| CRYBB2    | 0.092  | 0.093   | 0.9428 | 0.36879 | 0.536 | -6.11 | 0.46526 | none       |
| KCNE2     | 0.075  | 0.0825  | 0.9427 | 0.36882 | 0.536 | -6.11 | 0.88671 | none       |
| MSMB      | -0.094 | -0.0938 | -0.942 | 0.36912 | 0.536 | -6.11 | 1.23273 | none       |
| PRAMEF2C  | -0.094 | -0.0938 | -0.942 | 0.36914 | 0.536 | -6.11 | 0.85875 | none       |
| MEIS2     | -0.102 | -0.0788 | -0.942 | 0.3693  | 0.537 | -6.11 | 0.90863 | none       |
| APCDD1L   | -0.081 | -0.0535 | -0.942 | 0.36936 | 0.537 | -6.11 | 1.08564 | none       |
| POLI      | 0.14   | 0.1175  | 0.9413 | 0.36949 | 0.537 | -6.11 | 0.17005 | none       |
| KAZALD1   | -0.072 | -0.0884 | -0.941 | 0.36962 | 0.537 | -6.12 | 1.80404 | none       |
| ZDHHC12   | -0.12  | -0.0863 | -0.941 | 0.36971 | 0.537 | -6.12 | 2.24396 | AA-related |
| PDSS2     | 0.131  | 0.0565  | 0.9406 | 0.36982 | 0.537 | -6.12 | -0.4698 | none       |
| CCSAP     | 0.139  | 0.1493  | 0.9405 | 0.3699  | 0.537 | -6.12 | 0.31584 | none       |
| TRPC5     | 0.065  | 0.0384  | 0.9402 | 0.37004 | 0.537 | -6.12 | -0.7667 | none       |
| CCT6B     | 0.108  | 0.0615  | 0.9401 | 0.37009 | 0.537 | -6.12 | -0.6194 | none       |
| EPPIN-WFI | -0.064 | -0.0465 | -0.94  | 0.37009 | 0.537 | -6.12 | 1.0871  | none       |

|          |        |         |        |         |       |       |         |      |
|----------|--------|---------|--------|---------|-------|-------|---------|------|
| SNAPC4   | 0.228  | 0.3066  | 0.9399 | 0.37018 | 0.537 | -6.12 | 0.25407 | none |
| ZNF764   | 0.089  | 0.0389  | 0.9398 | 0.37023 | 0.537 | -6.12 | 0.35391 | none |
| ORMDL2   | -0.221 | -0.3399 | -0.94  | 0.37026 | 0.537 | -6.12 | 0.9472  | none |
| NUDT1    | -0.119 | -0.1847 | -0.94  | 0.37027 | 0.537 | -6.12 | 0.16236 | none |
| CLEC12A  | 0.083  | 0.0248  | 0.9396 | 0.37035 | 0.538 | -6.12 | -0.4366 | none |
| RPS6KA1  | -0.088 | -0.025  | -0.939 | 0.37041 | 0.538 | -6.12 | 1.40482 | none |
| AC022210 | -0.173 | -0.0973 | -0.939 | 0.37054 | 0.538 | -6.12 | 0.92351 | none |
| WWC2     | 0.105  | 0.0912  | 0.9392 | 0.37055 | 0.538 | -6.12 | 0.06    | none |
| OR4N5    | -0.065 | -0.0435 | -0.939 | 0.37058 | 0.538 | -6.12 | 0       | none |
| MYEF2    | 0.209  | 0.1114  | 0.9391 | 0.3706  | 0.538 | -6.12 | -0.7558 | none |
| BOK      | 0.084  | 0.0757  | 0.9388 | 0.37074 | 0.538 | -6.12 | 0.37749 | none |
| SEC14L5  | -0.062 | -0.0344 | -0.939 | 0.37077 | 0.538 | -6.12 | 0.96085 | none |
| GABBR2   | 0.11   | 0.0877  | 0.9384 | 0.37093 | 0.538 | -6.12 | -0.0776 | none |
| SLC1A3   | -0.103 | -0.0804 | -0.938 | 0.37096 | 0.538 | -6.12 | 1.02978 | none |
| CTXN1    | -0.072 | -0.0956 | -0.938 | 0.37108 | 0.538 | -6.12 | 0.93162 | none |
| PLD5     | 0.067  | 0.0426  | 0.9379 | 0.37115 | 0.538 | -6.12 | 1.6923  | none |
| FAM71D   | -0.186 | 0.0157  | -0.937 | 0.37138 | 0.538 | -6.12 | 0.01789 | none |
| MYD88    | -0.094 | -0.1023 | -0.937 | 0.37143 | 0.538 | -6.12 | 0.8347  | none |
| AC006445 | 0.439  | 0.2772  | 0.9373 | 0.37145 | 0.538 | -6.12 | 0.47873 | none |
| CENPJ    | 0.22   | 0.3381  | 0.937  | 0.37159 | 0.539 | -6.12 | 0.55494 | none |
| CRYGC    | -0.092 | -0.0925 | -0.937 | 0.37171 | 0.539 | -6.12 | 1.9054  | none |
| DNAL4    | -0.167 | -0.1632 | -0.937 | 0.37179 | 0.539 | -6.12 | 0.81817 | none |
| MRPS11   | -0.077 | -0.0711 | -0.937 | 0.3718  | 0.539 | -6.12 | -0.2083 | none |
| PCDHGC5  | 0.067  | 0.0668  | 0.9365 | 0.37183 | 0.539 | -6.12 | -0.3646 | none |
| CHRN2    | 0.16   | 0.1537  | 0.9364 | 0.37189 | 0.539 | -6.12 | -0.2365 | none |
| APMAP    | -0.104 | -0.1375 | -0.936 | 0.37204 | 0.539 | -6.12 | 1.29681 | none |
| ENDOD1   | -0.084 | -0.0344 | -0.936 | 0.37213 | 0.539 | -6.12 | 1.6292  | none |
| SARS     | -0.067 | -0.0483 | -0.936 | 0.37213 | 0.539 | -6.12 | 0.29505 | none |
| CLRN1    | 0.081  | 0.0424  | 0.9357 | 0.37226 | 0.539 | -6.12 | -0.6057 | none |
| CDIPT    | -0.113 | -0.137  | -0.935 | 0.37234 | 0.539 | -6.12 | 0.52984 | none |
| ANKAR    | -0.164 | -0.0969 | -0.935 | 0.37235 | 0.539 | -6.12 | 0.20801 | none |
| CABLES2  | 0.165  | 0.2449  | 0.9354 | 0.37237 | 0.539 | -6.12 | 0.7047  | none |
| TNFRSF1B | 0.134  | 0.166   | 0.9352 | 0.37249 | 0.539 | -6.12 | 0.32632 | none |
| HTATSF1  | 0.223  | 0.3261  | 0.935  | 0.37259 | 0.539 | -6.12 | 0.68512 | none |
| GNA15    | -0.099 | -0.0995 | -0.935 | 0.37265 | 0.539 | -6.12 | 1.05058 | none |
| FLI1     | 0.16   | 0.169   | 0.9349 | 0.37265 | 0.539 | -6.12 | -0.8754 | none |
| LILRB3   | 0.13   | 0.0601  | 0.9347 | 0.37275 | 0.54  | -6.12 | 1.28775 | none |
| MAP3K7   | 0.129  | 0.1651  | 0.9346 | 0.37278 | 0.54  | -6.12 | 0.64501 | none |
| CNTFR    | -0.069 | -0.0426 | -0.934 | 0.37289 | 0.54  | -6.12 | 0.75286 | none |
| NPIPA3   | 0.127  | 0.1281  | 0.9344 | 0.37289 | 0.54  | -6.12 | 1.47931 | none |

|          |        |         |        |         |       |       |         |      |
|----------|--------|---------|--------|---------|-------|-------|---------|------|
| FAM24A   | -0.092 | -0.0918 | -0.934 | 0.3731  | 0.54  | -6.12 | -0.5011 | none |
| HSPB8    | -0.079 | -0.0394 | -0.933 | 0.37335 | 0.54  | -6.12 | -0.0323 | none |
| CXORF49  | 0.102  | 0.1144  | 0.9333 | 0.3734  | 0.54  | -6.12 | 1.11704 | none |
| CXORF49B | 0.102  | 0.1144  | 0.9333 | 0.3734  | 0.54  | -6.12 | 1.11704 | none |
| MED7     | 0.12   | 0.0653  | 0.9331 | 0.37352 | 0.54  | -6.12 | -0.3731 | none |
| MAP10    | -0.097 | -0.0359 | -0.933 | 0.37356 | 0.54  | -6.12 | 0.77295 | none |
| POFUT2   | -0.18  | -0.1287 | -0.933 | 0.37363 | 0.54  | -6.12 | 0.17041 | none |
| RAB3C    | 0.089  | 0.0873  | 0.9328 | 0.37366 | 0.54  | -6.12 | 1.75078 | none |
| CAPN14   | -0.066 | -0.0461 | -0.933 | 0.37376 | 0.54  | -6.12 | 0       | none |
| TBC1D10C | -0.102 | -0.1062 | -0.933 | 0.37379 | 0.54  | -6.12 | 0.41133 | none |
| GABPA    | 0.142  | 0.1558  | 0.9325 | 0.3738  | 0.54  | -6.12 | -0.2592 | none |
| SLC45A2  | -0.103 | -0.1029 | -0.932 | 0.37388 | 0.54  | -6.12 | 1.17337 | none |
| CTSZ     | -0.087 | -0.0319 | -0.932 | 0.37391 | 0.54  | -6.12 | 1.58549 | none |
| STPG2    | -0.064 | -0.0412 | -0.932 | 0.37397 | 0.54  | -6.12 | 1.64801 | none |
| CAT      | 0.083  | -0.0179 | 0.9321 | 0.374   | 0.54  | -6.12 | -0.6442 | none |
| OR1D2    | 0.096  | 0.0921  | 0.9321 | 0.37402 | 0.54  | -6.12 | 0.24304 | none |
| SLBP     | 0.113  | 0.1361  | 0.9319 | 0.37408 | 0.541 | -6.12 | 1.38233 | none |
| TMEM238  | -0.115 | -0.1382 | -0.932 | 0.37418 | 0.541 | -6.12 | 0.51224 | none |
| FBXO30   | 0.092  | 0.0464  | 0.9312 | 0.37443 | 0.541 | -6.12 | 0.75165 | none |
| ITM2C    | -0.085 | -0.1357 | -0.931 | 0.37446 | 0.541 | -6.12 | 0.74437 | none |
| P2RX2    | 0.093  | 0.0611  | 0.9311 | 0.37451 | 0.541 | -6.12 | -0.1898 | none |
| BBOX1    | 0.094  | 0.094   | 0.9309 | 0.37461 | 0.541 | -6.12 | -0.8888 | none |
| RBM15    | 0.093  | 0.1173  | 0.9308 | 0.37466 | 0.541 | -6.12 | 0.37795 | none |
| ALG9     | 0.133  | 0.0022  | 0.9305 | 0.37479 | 0.541 | -6.12 | 0.53439 | none |
| JPH1     | 0.088  | 0.1177  | 0.9304 | 0.37483 | 0.541 | -6.12 | -0.0316 | none |
| PRR23A   | 0.094  | 0.0939  | 0.9304 | 0.37485 | 0.541 | -6.12 | 0.99131 | none |
| SNAPC2   | -0.099 | -0.0797 | -0.93  | 0.3749  | 0.541 | -6.13 | 0.39253 | none |
| C22ORF42 | 0.084  | 0.0912  | 0.9303 | 0.37491 | 0.541 | -6.13 | 0.59266 | none |
| ZNF598   | 0.18   | 0.3178  | 0.9296 | 0.37523 | 0.542 | -6.13 | 0.18608 | none |
| MIGA2    | 0.129  | 0.1063  | 0.9295 | 0.3753  | 0.542 | -6.13 | 0.44386 | none |
| PDLIM4   | 0.152  | 0.1676  | 0.9293 | 0.37538 | 0.542 | -6.13 | 0.88628 | none |
| STMN3    | 0.114  | 0.0741  | 0.9292 | 0.37542 | 0.542 | -6.13 | -0.3813 | none |
| OSBPL5   | -0.089 | -0.0483 | -0.929 | 0.37569 | 0.542 | -6.13 | 0.70259 | none |
| CXORF66  | 0.066  | 0.0663  | 0.9282 | 0.37592 | 0.542 | -6.13 | -0.129  | none |
| CBWD5    | 0.09   | 0.011   | 0.928  | 0.37603 | 0.542 | -6.13 | 0.1967  | none |
| RNGTT    | 0.143  | 0.1031  | 0.9279 | 0.37607 | 0.543 | -6.13 | -0.8002 | none |
| CFAP52   | 0.3    | 0.2763  | 0.9278 | 0.37615 | 0.543 | -6.13 | 0.4904  | none |
| GRIN1    | 0.115  | 0.1171  | 0.9275 | 0.37628 | 0.543 | -6.13 | 0.35447 | none |
| ENTPD6   | 0.171  | 0.1205  | 0.9275 | 0.37628 | 0.543 | -6.13 | 0.33997 | none |
| NOL10    | 0.22   | 0.2662  | 0.9273 | 0.37639 | 0.543 | -6.13 | -0.0143 | none |



|          |        |         |        |         |       |       |         |      |
|----------|--------|---------|--------|---------|-------|-------|---------|------|
| HIST1H3C | 0.483  | 0.2801  | 0.9272 | 0.37642 | 0.543 | -6.13 | -0.1693 | none |
| NOP56    | 0.16   | 0.2861  | 0.9271 | 0.37645 | 0.543 | -6.13 | 0.51476 | none |
| MYCL     | 0.079  | 0.0926  | 0.9271 | 0.37646 | 0.543 | -6.13 | 0.52499 | none |
| COX4I2   | 0.093  | 0.093   | 0.9271 | 0.37647 | 0.543 | -6.13 | 1.19688 | none |
| ISX      | 0.068  | 0.0423  | 0.927  | 0.3765  | 0.543 | -6.13 | -1.317  | none |
| MYLPF    | 0.333  | 0.2159  | 0.9269 | 0.37656 | 0.543 | -6.13 | -0.182  | none |
| UPK2     | 0.078  | 0.0974  | 0.9258 | 0.3771  | 0.543 | -6.13 | 1.5828  | none |
| OR1J2    | -0.064 | -0.0427 | -0.926 | 0.37719 | 0.544 | -6.13 | 0.49761 | none |
| PMEL     | 0.163  | 0.2582  | 0.9256 | 0.37722 | 0.544 | -6.13 | 1.22934 | none |
| GRAMD1C  | 0.143  | 0.1598  | 0.9255 | 0.37724 | 0.544 | -6.13 | 0.02599 | none |
| MTUS1    | 0.358  | 0.4025  | 0.9252 | 0.37742 | 0.544 | -6.13 | 0.79564 | none |
| NOS2     | 0.068  | 0.0524  | 0.9249 | 0.37755 | 0.544 | -6.13 | -0.5364 | none |
| CYBA     | -0.188 | -0.2404 | -0.925 | 0.37769 | 0.544 | -6.13 | 0.28056 | none |
| FBLN7    | -0.112 | -0.0903 | -0.925 | 0.3777  | 0.544 | -6.13 | 1.42536 | none |
| LINS1    | 0.096  | 0.0955  | 0.9246 | 0.3777  | 0.544 | -6.13 | 0.32117 | none |
| GRIA2    | -0.088 | -0.0884 | -0.924 | 0.37779 | 0.544 | -6.13 | 1.58675 | none |
| ARHGEF33 | -0.192 | -0.1457 | -0.924 | 0.37805 | 0.544 | -6.13 | 0.35461 | none |
| MMP3     | 0.09   | 0.0902  | 0.9239 | 0.37807 | 0.544 | -6.13 | 0.04014 | none |
| ITGB2    | -0.099 | -0.0403 | -0.924 | 0.3781  | 0.544 | -6.13 | 0.97685 | none |
| TMEM255  | 0.072  | 0.0744  | 0.9236 | 0.37819 | 0.544 | -6.13 | 0.21466 | none |
| CLIC3    | -0.202 | -0.1523 | -0.923 | 0.37845 | 0.545 | -6.13 | 1.64428 | none |
| PPP1R1B  | 0.093  | 0.0817  | 0.923  | 0.37851 | 0.545 | -6.13 | -0.1276 | none |
| AOC3     | 0.172  | 0.1941  | 0.9225 | 0.37874 | 0.545 | -6.13 | -0.3458 | none |
| FAM204A  | 0.079  | 0.0389  | 0.9224 | 0.37877 | 0.545 | -6.13 | 0.17839 | none |
| C20ORF14 | 0.092  | 0.0918  | 0.9223 | 0.37887 | 0.545 | -6.13 | 0.54171 | none |
| SERPINA6 | 0.068  | 0.066   | 0.9215 | 0.37923 | 0.546 | -6.13 | 1.52692 | none |
| SLC25A12 | 0.111  | 0.0587  | 0.9211 | 0.37942 | 0.546 | -6.13 | 0.1067  | none |
| AC015688 | -0.089 | -0.0887 | -0.921 | 0.37944 | 0.546 | -6.13 | 0.92737 | none |
| TSPAN4   | 0.174  | 0.2355  | 0.9211 | 0.37945 | 0.546 | -6.13 | -0.1908 | none |
| MRFAP1   | -0.096 | -0.1061 | -0.921 | 0.37947 | 0.546 | -6.13 | 0.64748 | none |
| SRR      | 0.098  | -0.0107 | 0.9204 | 0.37977 | 0.546 | -6.13 | -0.3196 | none |
| ATXN7L2  | 0.129  | 0.2307  | 0.9202 | 0.37986 | 0.546 | -6.13 | -0.4545 | none |
| ACTR6    | 0.181  | 0.0822  | 0.9202 | 0.37987 | 0.546 | -6.13 | 0.60302 | none |
| SLC39A2  | 0.154  | 0.0787  | 0.9195 | 0.38024 | 0.547 | -6.13 | -0.4938 | none |
| GSPT2    | 0.122  | 0.1643  | 0.919  | 0.3805  | 0.547 | -6.14 | -0.4318 | none |
| POTEF    | 0.116  | 0.0911  | 0.9188 | 0.3806  | 0.547 | -6.14 | -0.2479 | none |
| KHK      | 0.086  | 0.0703  | 0.9186 | 0.38068 | 0.547 | -6.14 | 1.14526 | none |
| RFX3     | 0.205  | 0.2726  | 0.9181 | 0.38093 | 0.548 | -6.14 | -0.5658 | none |
| MATN3    | 0.101  | 0.1005  | 0.9179 | 0.38104 | 0.548 | -6.14 | -0.7204 | none |
| PKP1     | 0.072  | 0.0762  | 0.9179 | 0.38105 | 0.548 | -6.14 | -0.6636 | none |

|           |        |         |        |         |       |       |         |      |
|-----------|--------|---------|--------|---------|-------|-------|---------|------|
| ENDOG     | -0.162 | -0.148  | -0.918 | 0.38107 | 0.548 | -6.14 | 0.95275 | none |
| TOB2      | 0.11   | 0.1648  | 0.9177 | 0.38111 | 0.548 | -6.14 | 0.71713 | none |
| ACADS     | 0.111  | 0.0929  | 0.9172 | 0.38139 | 0.548 | -6.14 | 0.66368 | none |
| CHKB      | 0.108  | 0.1024  | 0.917  | 0.38146 | 0.548 | -6.14 | 0.6287  | none |
| GPR108    | -0.098 | -0.0613 | -0.917 | 0.3817  | 0.548 | -6.14 | 0.29607 | none |
| UBE3B     | 0.099  | 0.0456  | 0.9164 | 0.38179 | 0.548 | -6.14 | 0.09373 | none |
| STRA8     | -0.063 | -0.0429 | -0.916 | 0.38184 | 0.548 | -6.14 | 1.88681 | none |
| TSC22D3   | 0.256  | 0.1455  | 0.9159 | 0.38202 | 0.549 | -6.14 | 0.25675 | none |
| COL2A1    | -0.086 | -0.0991 | -0.916 | 0.38214 | 0.549 | -6.14 | 0.23047 | none |
| ARF5      | -0.138 | -0.1629 | -0.915 | 0.38223 | 0.549 | -6.14 | 1.53276 | none |
| ZFHX4     | -0.182 | -0.1806 | -0.915 | 0.38238 | 0.549 | -6.14 | 1.40875 | none |
| TOP2A     | 0.323  | 0.476   | 0.9151 | 0.38241 | 0.549 | -6.14 | 0.28544 | none |
| SCRN1     | -0.116 | -0.0528 | -0.915 | 0.38258 | 0.549 | -6.14 | 0.27899 | none |
| ZC3H12A   | 0.186  | 0.2877  | 0.9148 | 0.38259 | 0.549 | -6.14 | 0.35558 | none |
| TSKS      | 0.179  | 0.1323  | 0.9141 | 0.3829  | 0.55  | -6.14 | 0.36152 | none |
| OR52W1    | 0.078  | 0.0817  | 0.9139 | 0.38302 | 0.55  | -6.14 | 0.93667 | none |
| PTPRH     | 0.091  | 0.0648  | 0.9134 | 0.38327 | 0.55  | -6.14 | 0.22636 | none |
| ADAMTSL1  | 0.179  | 0.1609  | 0.9129 | 0.38352 | 0.55  | -6.14 | -0.121  | none |
| PAQR9     | 0.073  | 0.0785  | 0.9129 | 0.38352 | 0.55  | -6.14 | -0.76   | none |
| PAX2      | 0.086  | 0.0915  | 0.9126 | 0.38366 | 0.55  | -6.14 | 1.0248  | none |
| BPI       | -0.071 | -0.0652 | -0.913 | 0.38368 | 0.55  | -6.14 | 1.10458 | none |
| MOB3C     | 0.098  | 0.1519  | 0.9125 | 0.38374 | 0.55  | -6.14 | -0.3759 | none |
| RBM17     | 0.127  | 0.2074  | 0.9124 | 0.38377 | 0.55  | -6.14 | -0.0631 | none |
| HAUS6     | 0.21   | 0.2456  | 0.9119 | 0.38405 | 0.551 | -6.14 | 0.72788 | none |
| RGS8      | -0.113 | -0.1149 | -0.912 | 0.38412 | 0.551 | -6.14 | 0.04322 | none |
| CLCN4     | -0.064 | -0.0413 | -0.912 | 0.38415 | 0.551 | -6.14 | 1.43582 | none |
| TTC9C     | -0.121 | -0.1633 | -0.912 | 0.38421 | 0.551 | -6.14 | 1.84487 | none |
| CLEC5A    | -0.063 | -0.0419 | -0.911 | 0.38427 | 0.551 | -6.14 | -0.7456 | none |
| HIST1H2AI | -0.173 | -0.2509 | -0.911 | 0.38447 | 0.551 | -6.14 | 0.32053 | none |
| CCDC107   | -0.103 | -0.1219 | -0.911 | 0.38465 | 0.551 | -6.14 | 1.78212 | none |
| GIP       | 0.089  | 0.089   | 0.9106 | 0.38467 | 0.551 | -6.14 | 0.83946 | none |
| MRGPRE    | 0.064  | 0.0471  | 0.9101 | 0.38492 | 0.552 | -6.14 | -1.2832 | none |
| OTUD7A    | 0.155  | 0.1653  | 0.9101 | 0.38495 | 0.552 | -6.14 | 0.9063  | none |
| TMEM30A   | 0.118  | 0.0682  | 0.91   | 0.38496 | 0.552 | -6.14 | 1.18465 | none |
| OLFML1    | 0.061  | 0.0426  | 0.9099 | 0.38502 | 0.552 | -6.14 | 0.47524 | none |
| F2RL1     | 0.101  | 0.022   | 0.9098 | 0.38507 | 0.552 | -6.14 | 0.22653 | none |
| PLB1      | -0.119 | -0.165  | -0.909 | 0.38527 | 0.552 | -6.14 | 1.67372 | none |
| CYP11A1   | 0.153  | 0.1177  | 0.909  | 0.38547 | 0.552 | -6.14 | -0.3246 | none |
| NKX2-6    | 0.088  | 0.0885  | 0.9086 | 0.3857  | 0.552 | -6.14 | -0.71   | none |
| PPP1R8    | 0.159  | 0.0871  | 0.9084 | 0.38576 | 0.553 | -6.15 | -0.2836 | none |

|           |        |         |        |         |       |       |         |      |
|-----------|--------|---------|--------|---------|-------|-------|---------|------|
| FSIP1     | 0.076  | 0.0288  | 0.9082 | 0.38587 | 0.553 | -6.15 | 0.02324 | none |
| RPL9      | -0.165 | -0.2445 | -0.908 | 0.3859  | 0.553 | -6.15 | 0.82223 | none |
| DRICH1    | 0.081  | 0.0451  | 0.908  | 0.38598 | 0.553 | -6.15 | 0.98676 | none |
| NFKB1     | 0.176  | 0.2769  | 0.9078 | 0.38608 | 0.553 | -6.15 | -0.0887 | none |
| LRRC45    | 0.135  | 0.1805  | 0.9077 | 0.38614 | 0.553 | -6.15 | -0.0385 | none |
| FAM86B2   | 0.263  | 0.1904  | 0.9074 | 0.38629 | 0.553 | -6.15 | 0.74523 | none |
| GCGR      | -0.077 | -0.056  | -0.907 | 0.38629 | 0.553 | -6.15 | 1.34322 | none |
| CMTR2     | 0.139  | 0.0791  | 0.9073 | 0.38635 | 0.553 | -6.15 | 0.72713 | none |
| NYX       | -0.081 | -0.0556 | -0.907 | 0.38637 | 0.553 | -6.15 | 0.88075 | none |
| CSRNP3    | -0.108 | -0.1076 | -0.906 | 0.38682 | 0.554 | -6.15 | -0.2684 | none |
| PUM3      | 0.218  | 0.3324  | 0.9062 | 0.38691 | 0.554 | -6.15 | 0.49596 | none |
| ARL2-SNX: | 0.075  | 0.0803  | 0.9055 | 0.38725 | 0.554 | -6.15 | 0.46135 | none |
| CCL26     | -0.085 | -0.0851 | -0.905 | 0.3874  | 0.554 | -6.15 | -0.2281 | none |
| TMEM35B   | -0.122 | -0.234  | -0.905 | 0.38751 | 0.554 | -6.15 | 1.21771 | none |
| HHLA1     | 0.161  | 0.1824  | 0.9048 | 0.38758 | 0.554 | -6.15 | 0.11558 | none |
| LTB       | 0.143  | 0.1342  | 0.9046 | 0.3877  | 0.555 | -6.15 | 0.25319 | none |
| QSOX1     | -0.092 | -0.0331 | -0.904 | 0.3878  | 0.555 | -6.15 | 1.36941 | none |
| EPHX3     | 0.064  | 0.0721  | 0.9042 | 0.38789 | 0.555 | -6.15 | 0.58211 | none |
| NIP7      | 0.097  | -0.0031 | 0.9038 | 0.38809 | 0.555 | -6.15 | -0.9283 | none |
| IL23A     | -0.08  | -0.0303 | -0.903 | 0.38829 | 0.555 | -6.15 | 0.62411 | none |
| ZNF706    | -0.126 | -0.1736 | -0.903 | 0.38837 | 0.555 | -6.15 | 0.30656 | none |
| ANXA9     | 0.102  | 0.1483  | 0.9032 | 0.38841 | 0.555 | -6.15 | -0.2037 | none |
| UGT1A7    | 0.075  | 0.0809  | 0.903  | 0.38852 | 0.555 | -6.15 | 0.84138 | none |
| IFI16     | 0.313  | 0.4087  | 0.9028 | 0.38859 | 0.555 | -6.15 | 0.48107 | none |
| PPP2R1B   | 0.239  | 0.1137  | 0.9027 | 0.38863 | 0.555 | -6.15 | -0.8067 | none |
| SORBS3    | 0.114  | 0.0803  | 0.9026 | 0.38869 | 0.555 | -6.15 | 0.56721 | none |
| HTRA1     | 0.062  | 0.0645  | 0.9024 | 0.38882 | 0.556 | -6.15 | 1.2718  | none |
| GOLGA6A   | 0.062  | 0.0644  | 0.9014 | 0.3893  | 0.556 | -6.15 | -0.1228 | none |
| TMX4      | 0.168  | 0.0687  | 0.9011 | 0.38946 | 0.556 | -6.15 | 1.12528 | none |
| PDCD6     | -0.109 | -0.1183 | -0.901 | 0.38967 | 0.557 | -6.15 | 0.55982 | none |
| CYB561D2  | -0.129 | -0.1236 | -0.9   | 0.38992 | 0.557 | -6.15 | 0.59615 | none |
| ZFAND6    | -0.137 | -0.2027 | -0.9   | 0.38995 | 0.557 | -6.15 | 0.84663 | none |
| VCP       | -0.098 | -0.0529 | -0.9   | 0.38997 | 0.557 | -6.15 | 1.47558 | none |
| REG1A     | 0.086  | 0.0865  | 0.8998 | 0.39013 | 0.557 | -6.15 | 0.28046 | none |
| MT-ND1    | 0.164  | 0.1871  | 0.8996 | 0.39021 | 0.557 | -6.15 | 0.18992 | none |
| ORAI3     | 0.089  | 0.0741  | 0.8991 | 0.39049 | 0.558 | -6.15 | -0.2725 | none |
| IFITM10   | 0.086  | 0.1184  | 0.8989 | 0.39055 | 0.558 | -6.15 | 0.92068 | none |
| NAALAD2   | 0.065  | 0.0748  | 0.8984 | 0.39081 | 0.558 | -6.15 | 0.75975 | none |
| B4GALNT4  | -0.116 | -0.0986 | -0.898 | 0.39103 | 0.558 | -6.15 | 1.87243 | none |
| RBP2      | 0.096  | 0.094   | 0.8979 | 0.39107 | 0.558 | -6.15 | 0.44088 | none |

|          |        |         |        |         |       |       |         |      |
|----------|--------|---------|--------|---------|-------|-------|---------|------|
| RFPL1    | -0.069 | -0.0048 | -0.898 | 0.3911  | 0.558 | -6.15 | 0.13082 | none |
| PLAC8    | -0.154 | -0.2306 | -0.898 | 0.39124 | 0.558 | -6.15 | 0.51917 | none |
| FRG1     | -0.096 | -0.0852 | -0.898 | 0.39127 | 0.558 | -6.15 | 0.71692 | none |
| ADAMTSL1 | -0.071 | -0.0726 | -0.897 | 0.3914  | 0.558 | -6.16 | 0.71239 | none |
| IFI27L1  | -0.204 | -0.2233 | -0.897 | 0.39142 | 0.558 | -6.16 | 0.12348 | none |
| IRX1     | -0.063 | -0.0547 | -0.897 | 0.39143 | 0.558 | -6.16 | 0       | none |
| DUSP13   | -0.091 | -0.0978 | -0.897 | 0.39148 | 0.558 | -6.16 | 0.60746 | none |
| SLC15A2  | 0.121  | 0.0759  | 0.897  | 0.39154 | 0.559 | -6.16 | 0.47448 | none |
| CPNE1    | 0.08   | 0.0501  | 0.8968 | 0.39163 | 0.559 | -6.16 | -0.8242 | none |
| TMX2     | -0.117 | -0.1477 | -0.897 | 0.39164 | 0.559 | -6.16 | 1.79856 | none |
| CARD17   | 0.178  | -0.0592 | 0.8966 | 0.39172 | 0.559 | -6.16 | 0.57062 | none |
| C20ORF96 | -0.161 | -0.0892 | -0.896 | 0.39182 | 0.559 | -6.16 | 1.85057 | none |
| ARHGEF9  | 0.219  | 0.2795  | 0.8964 | 0.39182 | 0.559 | -6.16 | -0.4517 | none |
| ASB1     | 0.181  | 0.1294  | 0.8963 | 0.3919  | 0.559 | -6.16 | 0.28787 | none |
| COL16A1  | 0.121  | 0.1585  | 0.8959 | 0.3921  | 0.559 | -6.16 | -0.582  | none |
| GBP1     | 0.235  | 0.2744  | 0.8954 | 0.39234 | 0.559 | -6.16 | 0.36649 | none |
| TRNP1    | 0.075  | 0.0719  | 0.8953 | 0.39241 | 0.559 | -6.16 | -0.5868 | none |
| LHX6     | 0.266  | 0.2132  | 0.8951 | 0.39249 | 0.559 | -6.16 | -0.8792 | none |
| ARL6IP6  | -0.182 | -0.2235 | -0.895 | 0.39262 | 0.56  | -6.16 | 1.11681 | none |
| CFHR3    | 0.08   | 0.0692  | 0.8946 | 0.39275 | 0.56  | -6.16 | 0.88077 | none |
| ZNF618   | 0.068  | 0.0731  | 0.8944 | 0.39286 | 0.56  | -6.16 | 0.46139 | none |
| CA11     | 0.099  | 0.1472  | 0.8941 | 0.39299 | 0.56  | -6.16 | 0.52765 | none |
| PDC      | -0.063 | -0.0545 | -0.894 | 0.39299 | 0.56  | -6.16 | 0       | none |
| AURKC    | 0.126  | 0.1322  | 0.8938 | 0.39316 | 0.56  | -6.16 | 0.26524 | none |
| BBX      | 0.226  | 0.3093  | 0.8937 | 0.3932  | 0.56  | -6.16 | 0.18089 | none |
| SARNP    | -0.074 | -0.0577 | -0.894 | 0.39323 | 0.56  | -6.16 | -0.0493 | none |
| DDIT3    | 0.188  | 0.149   | 0.8937 | 0.39324 | 0.56  | -6.16 | 0.09244 | none |
| ECHDC3   | 0.155  | 0.115   | 0.8936 | 0.39329 | 0.56  | -6.16 | 1.2043  | none |
| SCGN     | 0.088  | 0.0876  | 0.8935 | 0.39331 | 0.56  | -6.16 | 1.07554 | none |
| FEV      | -0.106 | -0.0831 | -0.894 | 0.39331 | 0.56  | -6.16 | -0.134  | none |
| CXADR    | 0.157  | 0.1679  | 0.8935 | 0.39332 | 0.56  | -6.16 | -0.0063 | none |
| MYCBP    | -0.179 | -0.1369 | -0.893 | 0.39337 | 0.56  | -6.16 | 1.43901 | none |
| PRAMEF14 | 0.088  | 0.0867  | 0.8934 | 0.39339 | 0.56  | -6.16 | 0.00397 | none |
| IKZF4    | 0.14   | 0.1266  | 0.8931 | 0.39354 | 0.56  | -6.16 | -0.5744 | none |
| PTRHD1   | -0.16  | -0.2037 | -0.893 | 0.39368 | 0.56  | -6.16 | 0.46235 | none |
| CDK5R1   | -0.081 | -0.0815 | -0.892 | 0.39387 | 0.561 | -6.16 | -0.1611 | none |
| PTK2B    | 0.154  | 0.2138  | 0.892  | 0.39409 | 0.561 | -6.16 | -0.2574 | none |
| FAM114A1 | -0.114 | -0.0879 | -0.892 | 0.39418 | 0.561 | -6.16 | 0.42727 | none |
| EFR3A    | 0.125  | 0.0619  | 0.8917 | 0.39421 | 0.561 | -6.16 | 0.46834 | none |
| GPC1     | -0.162 | -0.0734 | -0.892 | 0.39429 | 0.561 | -6.16 | 0.29118 | none |

|          |        |         |        |         |       |       |         |            |
|----------|--------|---------|--------|---------|-------|-------|---------|------------|
| UPRT     | -0.131 | -0.1252 | -0.891 | 0.39439 | 0.561 | -6.16 | 1.32833 | none       |
| CDC7     | 0.159  | 0.03    | 0.8913 | 0.39445 | 0.561 | -6.16 | -0.7909 | none       |
| STX19    | 0.063  | 0.0437  | 0.8912 | 0.39449 | 0.561 | -6.16 | 1.02951 | none       |
| PYM1     | -0.074 | -0.0107 | -0.891 | 0.39454 | 0.561 | -6.16 | 0.231   | none       |
| CXCL6    | -0.082 | -0.0821 | -0.891 | 0.39454 | 0.561 | -6.16 | 1.9054  | none       |
| SMPD4    | 0.115  | 0.2007  | 0.8911 | 0.39455 | 0.561 | -6.16 | 0.88259 | none       |
| TRPV2    | 0.121  | 0.0853  | 0.8909 | 0.39465 | 0.561 | -6.16 | -0.6036 | none       |
| ACKR3    | -0.164 | -0.1159 | -0.891 | 0.39473 | 0.561 | -6.16 | 1.51076 | none       |
| TNFSF9   | -0.133 | -0.1561 | -0.891 | 0.3948  | 0.561 | -6.16 | 0.87372 | none       |
| SMARCAD  | 0.169  | 0.2103  | 0.8904 | 0.39489 | 0.561 | -6.16 | 0.11419 | none       |
| RASL11A  | -0.207 | -0.2861 | -0.89  | 0.39495 | 0.561 | -6.16 | -0.1838 | none       |
| NEBL     | 0.2    | 0.3134  | 0.8902 | 0.395   | 0.561 | -6.16 | -0.0285 | none       |
| HAUS7    | 0.14   | 0.0948  | 0.8902 | 0.39501 | 0.561 | -6.16 | -0.9935 | none       |
| ZFR2     | 0.16   | 0.0697  | 0.8902 | 0.39502 | 0.561 | -6.16 | 0.13799 | none       |
| AC118758 | -0.314 | -0.1932 | -0.89  | 0.39505 | 0.561 | -6.16 | 1.83154 | none       |
| EDN3     | 0.06   | 0.0599  | 0.8899 | 0.39515 | 0.561 | -6.16 | 1.4015  | none       |
| FNBP1L   | 0.117  | 0.1688  | 0.8897 | 0.39525 | 0.561 | -6.16 | 0.64734 | none       |
| CSF1R    | 0.204  | 0.215   | 0.8896 | 0.3953  | 0.562 | -6.16 | -0.6402 | none       |
| NTHL1    | -0.088 | -0.0758 | -0.889 | 0.39542 | 0.562 | -6.16 | 0.54549 | none       |
| CCR2     | -0.116 | -0.1022 | -0.889 | 0.39565 | 0.562 | -6.16 | 0.58695 | none       |
| PHF24    | 0.083  | 0.0887  | 0.8885 | 0.39587 | 0.562 | -6.16 | 1.40049 | none       |
| LRIG3    | 0.084  | 0.0885  | 0.8883 | 0.39596 | 0.562 | -6.16 | -0.6186 | none       |
| CHAD     | -0.068 | -0.0373 | -0.888 | 0.396   | 0.562 | -6.16 | 0.85085 | none       |
| RAI2     | -0.105 | -0.0598 | -0.888 | 0.39601 | 0.562 | -6.16 | 0.79909 | none       |
| MZB1     | 0.115  | 0.0528  | 0.8881 | 0.39607 | 0.562 | -6.16 | 0.03253 | none       |
| LINGO3   | -0.093 | -0.0398 | -0.888 | 0.39629 | 0.563 | -6.16 | 1.71951 | none       |
| PRMT6    | 0.09   | 0.0353  | 0.8875 | 0.39638 | 0.563 | -6.16 | -0.1005 | none       |
| PPTC7    | 0.076  | 0.0132  | 0.8873 | 0.39649 | 0.563 | -6.16 | 0.0855  | none       |
| UGP2     | -0.064 | -0.0791 | -0.887 | 0.39655 | 0.563 | -6.16 | 1.35243 | none       |
| TMEM86A  | -0.127 | -0.1009 | -0.887 | 0.39656 | 0.563 | -6.16 | -0.3577 | none       |
| LRIT2    | 0.061  | 0.061   | 0.8871 | 0.39657 | 0.563 | -6.16 | 0.99008 | none       |
| SNPH     | 0.11   | 0.1201  | 0.8867 | 0.3968  | 0.563 | -6.16 | 0.10348 | none       |
| POLA1    | 0.26   | 0.3504  | 0.8867 | 0.3968  | 0.563 | -6.16 | 0.46997 | none       |
| CPNE6    | -0.081 | -0.0604 | -0.887 | 0.39687 | 0.563 | -6.16 | 2.2982  | AA-related |
| CHRND    | -0.058 | -0.0342 | -0.886 | 0.39703 | 0.563 | -6.16 | 0       | none       |
| PPIE     | 0.078  | 0.0408  | 0.8862 | 0.39705 | 0.563 | -6.16 | -0.5122 | none       |
| ZNF592   | 0.228  | 0.3563  | 0.886  | 0.39713 | 0.563 | -6.17 | -0.3539 | none       |
| PTPRCAP  | -0.132 | -0.1706 | -0.886 | 0.39721 | 0.563 | -6.17 | 1.41237 | none       |
| CCR9     | -0.073 | -0.0768 | -0.886 | 0.39723 | 0.563 | -6.17 | 1.2634  | none       |
| LYPD2    | -0.061 | -0.0404 | -0.886 | 0.39735 | 0.563 | -6.17 | 0       | none       |

|         |        |         |        |         |       |       |         |            |
|---------|--------|---------|--------|---------|-------|-------|---------|------------|
| NACA2   | 0.168  | 0.1375  | 0.8854 | 0.39744 | 0.563 | -6.17 | 1.25226 | none       |
| HAL     | -0.134 | -0.0411 | -0.885 | 0.39745 | 0.563 | -6.17 | 0.46421 | none       |
| TGDS    | -0.105 | -0.1469 | -0.885 | 0.39753 | 0.564 | -6.17 | 1.18174 | none       |
| TMEM196 | 0.081  | 0.083   | 0.8852 | 0.39758 | 0.564 | -6.17 | 1.29681 | none       |
| MAT2A   | -0.094 | -0.0696 | -0.885 | 0.39762 | 0.564 | -6.17 | 0.71372 | none       |
| JAGN1   | -0.139 | -0.1803 | -0.885 | 0.39791 | 0.564 | -6.17 | 1.67914 | none       |
| HORMAD1 | -0.129 | -0.0983 | -0.884 | 0.398   | 0.564 | -6.17 | 0.61052 | none       |
| SPANXC  | -0.167 | -0.1562 | -0.884 | 0.39801 | 0.564 | -6.17 | 0.35013 | none       |
| MTUS2   | -0.108 | -0.0837 | -0.884 | 0.39812 | 0.564 | -6.17 | 1.6632  | none       |
| PPP2R5B | 0.129  | 0.1606  | 0.8841 | 0.39813 | 0.564 | -6.17 | -0.0481 | none       |
| STARD5  | -0.221 | -0.1074 | -0.884 | 0.39813 | 0.564 | -6.17 | 1.40177 | none       |
| TULP3   | 0.161  | 0.147   | 0.8839 | 0.39824 | 0.564 | -6.17 | 0.39195 | none       |
| TYRP1   | -0.081 | -0.0806 | -0.883 | 0.39847 | 0.564 | -6.17 | 1.14241 | none       |
| FAM83A  | -0.21  | -0.2304 | -0.883 | 0.39879 | 0.565 | -6.17 | 0.52485 | none       |
| ADIPOR2 | 0.132  | 0.1268  | 0.8827 | 0.39884 | 0.565 | -6.17 | -0.4067 | none       |
| ID1     | -0.118 | -0.1022 | -0.883 | 0.39893 | 0.565 | -6.17 | 1.43431 | none       |
| HOXC10  | 0.083  | 0.0827  | 0.8825 | 0.39895 | 0.565 | -6.17 | 0.63623 | none       |
| ABHD14A | 0.135  | -0.0031 | 0.8825 | 0.39896 | 0.565 | -6.17 | 0.46321 | none       |
| CCL13   | -0.08  | -0.0804 | -0.882 | 0.39897 | 0.565 | -6.17 | 1.9054  | none       |
| ATAD3B  | 0.12   | 0.1819  | 0.8824 | 0.39898 | 0.565 | -6.17 | 0.20447 | none       |
| ODF4    | 0.06   | 0.0604  | 0.8823 | 0.39903 | 0.565 | -6.17 | 1.54859 | none       |
| LAT     | -0.105 | -0.0991 | -0.882 | 0.39905 | 0.565 | -6.17 | 0.44139 | none       |
| BCL2    | -0.107 | -0.0655 | -0.882 | 0.39909 | 0.565 | -6.17 | 1.00333 | none       |
| SMARCD1 | -0.167 | -0.1568 | -0.882 | 0.39913 | 0.565 | -6.17 | 0.56381 | none       |
| ASIC1   | 0.151  | 0.1742  | 0.882  | 0.39921 | 0.565 | -6.17 | 1.0464  | none       |
| PAF1    | 0.16   | 0.2407  | 0.882  | 0.39921 | 0.565 | -6.17 | 0.61562 | none       |
| TRIM54  | -0.071 | -0.0359 | -0.882 | 0.39923 | 0.565 | -6.17 | 0.11852 | none       |
| IL20RA  | 0.083  | 0.0825  | 0.8816 | 0.39942 | 0.565 | -6.17 | -0.8671 | none       |
| CCDC116 | 0.106  | 0.0987  | 0.8815 | 0.39947 | 0.565 | -6.17 | -0.6504 | none       |
| VAPA    | -0.109 | -0.1305 | -0.881 | 0.39961 | 0.565 | -6.17 | 1.37446 | none       |
| MEX3D   | 0.096  | 0.1402  | 0.8812 | 0.39961 | 0.565 | -6.17 | 0.54302 | none       |
| ADGRE3  | -0.112 | -0.1124 | -0.881 | 0.39971 | 0.565 | -6.17 | 2.15035 | AA-related |
| METTL17 | 0.095  | 0.0686  | 0.8808 | 0.39984 | 0.565 | -6.17 | 0.64788 | none       |
| TRIM17  | -0.059 | -0.0271 | -0.881 | 0.39984 | 0.565 | -6.17 | 1.07357 | none       |
| AKAP3   | -0.116 | -0.0323 | -0.881 | 0.39995 | 0.565 | -6.17 | 0.39782 | none       |
| HTR1A   | -0.08  | -0.0797 | -0.879 | 0.40064 | 0.566 | -6.17 | 2.05429 | none       |
| KRT1    | 0.09   | 0.0978  | 0.8787 | 0.40089 | 0.567 | -6.17 | 1.64245 | none       |
| IFT46   | 0.101  | 0.0271  | 0.8786 | 0.40096 | 0.567 | -6.17 | 1.23215 | none       |
| IGSF11  | -0.16  | -0.1311 | -0.878 | 0.40103 | 0.567 | -6.17 | -0.4135 | none       |
| DKK2    | 0.061  | 0.0552  | 0.8783 | 0.40109 | 0.567 | -6.17 | 0       | none       |

|          |        |         |        |         |       |       |         |            |
|----------|--------|---------|--------|---------|-------|-------|---------|------------|
| GJB6     | 0.152  | 0.1048  | 0.8781 | 0.40122 | 0.567 | -6.17 | 0.87636 | none       |
| SYNDIG1L | 0.063  | 0.0746  | 0.8781 | 0.40124 | 0.567 | -6.17 | -0.7199 | none       |
| BMX      | 0.082  | 0.0817  | 0.8779 | 0.40131 | 0.567 | -6.17 | 1.19688 | none       |
| POGK     | 0.125  | 0.1655  | 0.8778 | 0.40138 | 0.567 | -6.17 | 1.02123 | none       |
| SPDYE6   | 0.239  | 0.2685  | 0.8774 | 0.40159 | 0.567 | -6.17 | 0.60262 | none       |
| AC107081 | 0.088  | 0.1175  | 0.8773 | 0.40162 | 0.567 | -6.17 | 0.40726 | none       |
| ANKRD13E | 0.229  | 0.2751  | 0.8773 | 0.40163 | 0.567 | -6.17 | -0.0013 | none       |
| GORASP1  | 0.083  | 0.1677  | 0.8772 | 0.40169 | 0.567 | -6.17 | 0.72794 | none       |
| C19ORF12 | 0.065  | 0.0249  | 0.8771 | 0.40171 | 0.567 | -6.17 | 0.04813 | none       |
| UBN1     | 0.205  | 0.335   | 0.8771 | 0.40173 | 0.567 | -6.17 | 0.24407 | none       |
| GK       | 0.079  | 0.0064  | 0.8769 | 0.40181 | 0.567 | -6.17 | -0.0473 | none       |
| TRIT1    | -0.128 | -0.0923 | -0.877 | 0.40188 | 0.567 | -6.17 | 0.32361 | none       |
| ZNF534   | 0.117  | 0.0683  | 0.8766 | 0.40198 | 0.567 | -6.17 | -0.3451 | none       |
| CCDC102A | -0.122 | -0.0247 | -0.877 | 0.40201 | 0.567 | -6.17 | 0.88333 | none       |
| CXCL17   | 0.108  | 0.0777  | 0.8765 | 0.40206 | 0.567 | -6.17 | 0.03167 | none       |
| NEUROD2  | 0.148  | 0.0794  | 0.8764 | 0.40209 | 0.567 | -6.17 | -0.0697 | none       |
| HCRT     | 0.134  | 0.0938  | 0.8763 | 0.40215 | 0.567 | -6.17 | 0.50621 | none       |
| OR11L1   | -0.079 | -0.0791 | -0.876 | 0.4023  | 0.568 | -6.17 | 0.64435 | none       |
| EMC9     | 0.166  | 0.0948  | 0.8758 | 0.4024  | 0.568 | -6.17 | -0.8112 | none       |
| OR56A3   | -0.067 | -0.0556 | -0.876 | 0.40248 | 0.568 | -6.17 | 0.81278 | none       |
| GOLGA6L1 | 0.082  | 0.0549  | 0.8755 | 0.40254 | 0.568 | -6.17 | 0.28888 | none       |
| KIN      | 0.094  | 0.0571  | 0.8753 | 0.40267 | 0.568 | -6.17 | 0.6775  | none       |
| SPOCK1   | 0.103  | 0.1684  | 0.8749 | 0.40285 | 0.568 | -6.17 | -0.2214 | none       |
| CCNA1    | -0.073 | -0.0667 | -0.874 | 0.40346 | 0.569 | -6.18 | 0.88832 | none       |
| CCL11    | -0.079 | -0.0787 | -0.874 | 0.40353 | 0.569 | -6.18 | 2.13744 | AA-related |
| TMPRSS2  | -0.155 | -0.1266 | -0.874 | 0.40354 | 0.569 | -6.18 | 2.08895 | none       |
| ARAP3    | -0.089 | -0.0534 | -0.874 | 0.40357 | 0.569 | -6.18 | -0.1791 | none       |
| TMEM147  | -0.157 | -0.1698 | -0.873 | 0.40368 | 0.569 | -6.18 | 1.43293 | none       |
| PLAA     | -0.104 | -0.045  | -0.873 | 0.40377 | 0.569 | -6.18 | 1.98196 | none       |
| TRPC5OS  | -0.069 | -0.0658 | -0.873 | 0.4039  | 0.569 | -6.18 | 1.9792  | none       |
| DCXR     | -0.096 | -0.112  | -0.873 | 0.40403 | 0.569 | -6.18 | 1.53633 | none       |
| PGA4     | 0.076  | 0.1187  | 0.8727 | 0.40403 | 0.569 | -6.18 | -0.3144 | none       |
| TSC22D2  | 0.183  | 0.225   | 0.8726 | 0.40406 | 0.569 | -6.18 | 0.47002 | none       |
| SSBP4    | -0.145 | -0.1169 | -0.872 | 0.40412 | 0.569 | -6.18 | 0.63529 | none       |
| KRT10    | -0.093 | -0.0778 | -0.872 | 0.40415 | 0.569 | -6.18 | 1.22987 | none       |
| OXR1     | 0.157  | 0.2241  | 0.8722 | 0.40426 | 0.57  | -6.18 | -0.0343 | none       |
| ANTXR1   | 0.107  | 0.1122  | 0.872  | 0.40439 | 0.57  | -6.18 | 0.63746 | none       |
| MBLAC1   | 0.12   | 0.0047  | 0.8715 | 0.40466 | 0.57  | -6.18 | 0.00662 | none       |
| SLC5A2   | 0.136  | 0.1009  | 0.8714 | 0.4047  | 0.57  | -6.18 | 1.32434 | none       |
| AL513523 | -0.059 | -0.0311 | -0.871 | 0.40475 | 0.57  | -6.18 | 1.61352 | none       |

|          |        |         |        |         |       |       |         |      |
|----------|--------|---------|--------|---------|-------|-------|---------|------|
| GAGE10   | 0.08   | 0.0804  | 0.8712 | 0.40479 | 0.57  | -6.18 | 1.52574 | none |
| PRL      | -0.08  | -0.0516 | -0.871 | 0.40485 | 0.57  | -6.18 | -0.4674 | none |
| SERINC4  | -0.102 | -0.0745 | -0.871 | 0.40487 | 0.57  | -6.18 | 1.1658  | none |
| CT45A6   | 0.08   | 0.0803  | 0.8708 | 0.40499 | 0.57  | -6.18 | 1.00727 | none |
| KRT27    | 0.08   | 0.0803  | 0.8708 | 0.40499 | 0.57  | -6.18 | 1.19688 | none |
| OR3A1    | 0.11   | 0.0952  | 0.8707 | 0.40504 | 0.57  | -6.18 | -0.7339 | none |
| MPC1     | -0.174 | -0.2508 | -0.87  | 0.40525 | 0.57  | -6.18 | 0.39964 | none |
| ISOC1    | -0.121 | -0.124  | -0.87  | 0.40528 | 0.57  | -6.18 | 0.60313 | none |
| CYP19A1  | -0.199 | -0.227  | -0.87  | 0.40531 | 0.57  | -6.18 | -0.447  | none |
| PSME3    | -0.125 | -0.1066 | -0.87  | 0.4054  | 0.57  | -6.18 | 1.16847 | none |
| EVX1     | 0.091  | 0.1037  | 0.869  | 0.40594 | 0.571 | -6.18 | -0.8091 | none |
| ALG13    | -0.149 | -0.2459 | -0.868 | 0.40622 | 0.572 | -6.18 | 0.33939 | none |
| GLYATL1  | 0.168  | 0.0761  | 0.8683 | 0.40628 | 0.572 | -6.18 | -0.2654 | none |
| FMR1NB   | -0.1   | -0.0898 | -0.868 | 0.40653 | 0.572 | -6.18 | 1.29506 | none |
| USP17L7  | 0.059  | 0.0418  | 0.8678 | 0.40656 | 0.572 | -6.18 | 0       | none |
| SETD1A   | 0.223  | 0.384   | 0.8677 | 0.40658 | 0.572 | -6.18 | 0.07955 | none |
| C1QTNF7  | 0.065  | 0.0684  | 0.8674 | 0.40677 | 0.572 | -6.18 | 1.10778 | none |
| TPPP3    | -0.104 | -0.0355 | -0.867 | 0.40686 | 0.572 | -6.18 | 0.58715 | none |
| XPNPEP2  | -0.067 | -0.0438 | -0.867 | 0.40691 | 0.572 | -6.18 | 0.61382 | none |
| PCBD1    | -0.154 | -0.1475 | -0.867 | 0.40694 | 0.572 | -6.18 | 1.37026 | none |
| FDCSP    | -0.077 | -0.0773 | -0.867 | 0.40722 | 0.573 | -6.18 | 1.9054  | none |
| OAT      | 0.085  | -0.034  | 0.8664 | 0.40729 | 0.573 | -6.18 | 0.23808 | none |
| VAV2     | 0.138  | 0.2173  | 0.8663 | 0.40731 | 0.573 | -6.18 | -0.2444 | none |
| APOC3    | 0.079  | 0.0802  | 0.8662 | 0.4074  | 0.573 | -6.18 | 0.8025  | none |
| POLR3G   | -0.145 | -0.1053 | -0.866 | 0.40756 | 0.573 | -6.18 | 1.06982 | none |
| ARMC1    | -0.133 | -0.1681 | -0.866 | 0.40757 | 0.573 | -6.18 | 0.52924 | none |
| SDAD1    | 0.264  | 0.3041  | 0.8653 | 0.40787 | 0.573 | -6.18 | -0.2936 | none |
| CKMT2    | 0.245  | 0.1941  | 0.8651 | 0.40797 | 0.573 | -6.18 | -0.8787 | none |
| PIANP    | -0.065 | -0.0392 | -0.865 | 0.40801 | 0.573 | -6.18 | 1.37377 | none |
| IGSF3    | 0.124  | 0.1135  | 0.8648 | 0.40813 | 0.573 | -6.18 | -0.0899 | none |
| PRPF40A  | 0.238  | 0.3508  | 0.8647 | 0.40818 | 0.573 | -6.18 | 0.47809 | none |
| LGALS9   | -0.178 | -0.2069 | -0.865 | 0.40826 | 0.573 | -6.18 | 0.61491 | none |
| HIST1H3J | -0.3   | -0.3381 | -0.864 | 0.40832 | 0.573 | -6.18 | 1.5622  | none |
| TG       | -0.123 | -0.0504 | -0.864 | 0.40835 | 0.573 | -6.18 | 0.27824 | none |
| NUDT18   | -0.118 | -0.1113 | -0.864 | 0.4084  | 0.574 | -6.18 | 0.4842  | none |
| PPT1     | -0.13  | -0.1493 | -0.864 | 0.40853 | 0.574 | -6.18 | 1.34765 | none |
| GSTM2    | 0.126  | 0.0473  | 0.8637 | 0.40867 | 0.574 | -6.18 | -0.6188 | none |
| LEFTY1   | -0.147 | -0.0822 | -0.864 | 0.40868 | 0.574 | -6.18 | 0.59395 | none |
| GAB4     | -0.062 | -0.0615 | -0.864 | 0.40872 | 0.574 | -6.18 | 0.57238 | none |
| GUCA2B   | 0.079  | 0.0789  | 0.8636 | 0.40873 | 0.574 | -6.18 | 0.44852 | none |



|           |        |         |        |         |       |       |         |      |
|-----------|--------|---------|--------|---------|-------|-------|---------|------|
| CADM4     | -0.084 | -0.083  | -0.864 | 0.40879 | 0.574 | -6.18 | 0.95784 | none |
| KIAA0040  | 0.147  | 0.1931  | 0.8635 | 0.40881 | 0.574 | -6.18 | 0.03906 | none |
| GYS1      | 0.133  | 0.2297  | 0.8635 | 0.40882 | 0.574 | -6.18 | 0.92698 | none |
| CPA6      | 0.062  | 0.062   | 0.8633 | 0.40888 | 0.574 | -6.18 | 0.76829 | none |
| HOXA11    | 0.062  | 0.0622  | 0.8633 | 0.40892 | 0.574 | -6.18 | 0       | none |
| HIST1H2AI | -0.195 | -0.1816 | -0.863 | 0.40893 | 0.574 | -6.18 | 1.42628 | none |
| S100P     | 0.169  | 0.0317  | 0.8632 | 0.40898 | 0.574 | -6.19 | 1.28066 | none |
| INTS7     | 0.109  | 0.0755  | 0.8631 | 0.40899 | 0.574 | -6.19 | -0.2639 | none |
| HMOX1     | 0.082  | 0.0871  | 0.8631 | 0.40902 | 0.574 | -6.19 | 0.55482 | none |
| IL21      | -0.158 | -0.167  | -0.863 | 0.40918 | 0.574 | -6.19 | 1.4096  | none |
| A1CF      | 0.078  | 0.0499  | 0.8627 | 0.40921 | 0.574 | -6.19 | 0.12959 | none |
| TST       | -0.267 | -0.2897 | -0.863 | 0.40926 | 0.574 | -6.19 | 1.94894 | none |
| NSMCE2    | 0.111  | 0.0496  | 0.8626 | 0.40928 | 0.574 | -6.19 | -0.428  | none |
| SLX1B     | 0.115  | 0.0024  | 0.8624 | 0.40938 | 0.574 | -6.19 | -0.8176 | none |
| RRS1      | 0.129  | 0.174   | 0.862  | 0.4096  | 0.574 | -6.19 | 0.52336 | none |
| IQCF5     | 0.079  | 0.0785  | 0.8618 | 0.40967 | 0.574 | -6.19 | -0.9162 | none |
| BCL6      | 0.169  | 0.2535  | 0.8618 | 0.40969 | 0.574 | -6.19 | -0.3477 | none |
| CBX6      | 0.17   | 0.3205  | 0.8615 | 0.40985 | 0.574 | -6.19 | -0.4196 | none |
| CDRT1     | 0.113  | 0.1244  | 0.8611 | 0.41008 | 0.575 | -6.19 | -0.1255 | none |
| LGALS13   | 0.078  | 0.0784  | 0.861  | 0.41009 | 0.575 | -6.19 | 0.66005 | none |
| SPIRE1    | -0.12  | -0.018  | -0.861 | 0.41015 | 0.575 | -6.19 | -0.0632 | none |
| FIGNL1    | -0.126 | -0.102  | -0.861 | 0.4103  | 0.575 | -6.19 | -0.0854 | none |
| SLC25A19  | -0.085 | -0.0516 | -0.86  | 0.41039 | 0.575 | -6.19 | 0.69729 | none |
| NOP58     | 0.185  | 0.2487  | 0.8603 | 0.41049 | 0.575 | -6.19 | 0.53492 | none |
| ALDOC     | -0.111 | -0.0792 | -0.86  | 0.41062 | 0.575 | -6.19 | 0.90752 | none |
| USO1      | 0.167  | 0.1956  | 0.8599 | 0.41066 | 0.575 | -6.19 | 0.7035  | none |
| SUSD3     | 0.095  | 0.0419  | 0.8598 | 0.41074 | 0.575 | -6.19 | 0.08007 | none |
| NFIL3     | -0.085 | -0.0142 | -0.86  | 0.41076 | 0.575 | -6.19 | 1.69043 | none |
| YIF1A     | -0.147 | -0.1908 | -0.86  | 0.41077 | 0.575 | -6.19 | 0.62849 | none |
| EMSY      | 0.138  | 0.2427  | 0.8595 | 0.41087 | 0.575 | -6.19 | 0.55793 | none |
| KDM3A     | 0.213  | 0.2821  | 0.8591 | 0.41113 | 0.576 | -6.19 | -0.7291 | none |
| GAS2L2    | -0.059 | -0.0488 | -0.859 | 0.41122 | 0.576 | -6.19 | 1.29326 | none |
| FGR       | 0.106  | 0.1276  | 0.8587 | 0.41129 | 0.576 | -6.19 | 0.21867 | none |
| FBXW7     | 0.243  | 0.3539  | 0.8584 | 0.41148 | 0.576 | -6.19 | 0.84091 | none |
| TMEM70    | -0.125 | -0.144  | -0.858 | 0.41152 | 0.576 | -6.19 | 1.35697 | none |
| NT5C      | 0.09   | 0.0571  | 0.8582 | 0.41156 | 0.576 | -6.19 | 1.41802 | none |
| TMPRSS4   | 0.172  | 0.0819  | 0.8578 | 0.41179 | 0.576 | -6.19 | -0.5486 | none |
| PDLIM7    | 0.096  | 0.1394  | 0.8577 | 0.41186 | 0.576 | -6.19 | 0.14681 | none |
| MALT1     | 0.184  | 0.1054  | 0.8576 | 0.41189 | 0.576 | -6.19 | 0.01033 | none |
| SLC12A5   | -0.283 | -0.2133 | -0.858 | 0.41191 | 0.576 | -6.19 | 0.85946 | none |

|          |        |         |        |         |       |       |         |      |
|----------|--------|---------|--------|---------|-------|-------|---------|------|
| PLA2G1B  | -0.111 | -0.104  | -0.857 | 0.41195 | 0.576 | -6.19 | 0.62456 | none |
| ADAD1    | -0.101 | -0.1014 | -0.857 | 0.41201 | 0.576 | -6.19 | 0.63836 | none |
| HOXA7    | 0.091  | 0.0946  | 0.8568 | 0.41229 | 0.577 | -6.19 | -0.3275 | none |
| PKDCC    | 0.171  | 0.1707  | 0.8568 | 0.41232 | 0.577 | -6.19 | 0.57062 | none |
| HIST2H2A | -0.539 | -0.4339 | -0.857 | 0.41233 | 0.577 | -6.19 | 1.24856 | none |
| EXOSC9   | -0.126 | -0.0859 | -0.857 | 0.4124  | 0.577 | -6.19 | 0.70195 | none |
| GRK5     | 0.173  | 0.2413  | 0.8564 | 0.41254 | 0.577 | -6.19 | -0.3017 | none |
| OR52K2   | 0.058  | 0.0582  | 0.8563 | 0.41257 | 0.577 | -6.19 | 0.59355 | none |
| SPAG6    | 0.081  | 0.0786  | 0.856  | 0.41273 | 0.577 | -6.19 | 0.44486 | none |
| FABP1    | -0.113 | -0.1237 | -0.856 | 0.41274 | 0.577 | -6.19 | -0.0121 | none |
| FRMD6    | -0.138 | -0.132  | -0.856 | 0.41291 | 0.577 | -6.19 | 1.63002 | none |
| NPHP3-AC | 0.07   | 0.0928  | 0.8556 | 0.41293 | 0.577 | -6.19 | 0.32129 | none |
| CLDN3    | -0.071 | -0.0546 | -0.856 | 0.41296 | 0.577 | -6.19 | 0.33276 | none |
| TRAT1    | -0.127 | -0.2378 | -0.855 | 0.41305 | 0.577 | -6.19 | 0.7302  | none |
| LIMS2    | 0.109  | 0.0935  | 0.8554 | 0.41305 | 0.577 | -6.19 | -0.5724 | none |
| ADARB1   | 0.273  | 0.24    | 0.8552 | 0.41317 | 0.577 | -6.19 | -0.1539 | none |
| GBX1     | 0.071  | 0.0801  | 0.855  | 0.41327 | 0.577 | -6.19 | 0.24643 | none |
| SULT4A1  | 0.106  | 0.114   | 0.8549 | 0.41329 | 0.577 | -6.19 | -0.624  | none |
| SP100    | 0.15   | 0.1812  | 0.8549 | 0.41331 | 0.577 | -6.19 | 0.29251 | none |
| TPTE     | -0.07  | -0.0696 | -0.855 | 0.41347 | 0.578 | -6.19 | 1.1485  | none |
| MAX      | -0.098 | -0.1467 | -0.855 | 0.4135  | 0.578 | -6.19 | -0.0712 | none |
| STXBP4   | 0.144  | 0.0477  | 0.8544 | 0.41359 | 0.578 | -6.19 | 0.17394 | none |
| RBBP8    | 0.295  | 0.4172  | 0.8542 | 0.41368 | 0.578 | -6.19 | 0.42608 | none |
| HSPB11   | -0.124 | -0.2253 | -0.854 | 0.41391 | 0.578 | -6.19 | 0.36776 | none |
| LCP2     | 0.168  | 0.1923  | 0.8537 | 0.41396 | 0.578 | -6.19 | -0.8116 | none |
| DLL3     | -0.143 | -0.1036 | -0.854 | 0.414   | 0.578 | -6.19 | 1.79883 | none |
| SRSF4    | 0.17   | 0.2516  | 0.8531 | 0.41426 | 0.578 | -6.19 | 1.00272 | none |
| ING3     | 0.105  | 0.0899  | 0.853  | 0.4143  | 0.578 | -6.19 | 0.4272  | none |
| LSM7     | 0.14   | 0.078   | 0.852  | 0.41482 | 0.579 | -6.19 | -0.5989 | none |
| KIF5A    | 0.071  | 0.0654  | 0.852  | 0.41483 | 0.579 | -6.19 | 0.52389 | none |
| LAMA4    | -0.127 | -0.0873 | -0.852 | 0.41496 | 0.579 | -6.19 | 0.94734 | none |
| TMPRSS11 | -0.062 | -0.0643 | -0.852 | 0.41511 | 0.579 | -6.2  | 0       | none |
| MRPL52   | -0.127 | -0.1546 | -0.851 | 0.41522 | 0.579 | -6.2  | 1.20722 | none |
| BCL2L12  | -0.132 | -0.1382 | -0.851 | 0.41537 | 0.58  | -6.2  | 1.08948 | none |
| MAOB     | -0.128 | -0.0883 | -0.851 | 0.41548 | 0.58  | -6.2  | 0.21675 | none |
| PRPF18   | -0.109 | -0.1369 | -0.851 | 0.41562 | 0.58  | -6.2  | 0.45293 | none |
| SDHA     | 0.09   | 0.105   | 0.8503 | 0.41573 | 0.58  | -6.2  | 0.87324 | none |
| MXD4     | -0.083 | -0.0736 | -0.85  | 0.4159  | 0.58  | -6.2  | 0.72365 | none |
| FOLH1    | 0.058  | 0.039   | 0.85   | 0.41592 | 0.58  | -6.2  | -0.3176 | none |
| GGTLC1   | 0.062  | 0.0337  | 0.8496 | 0.41611 | 0.58  | -6.2  | 0.20297 | none |

|           |        |         |        |         |       |      |         |      |
|-----------|--------|---------|--------|---------|-------|------|---------|------|
| KRTAP19-1 | -0.074 | -0.0743 | -0.849 | 0.41617 | 0.58  | -6.2 | 2.06233 | none |
| HTT       | 0.244  | 0.2985  | 0.8492 | 0.41633 | 0.58  | -6.2 | 0.93788 | none |
| TUBGCP3   | 0.096  | 0.0985  | 0.8492 | 0.41633 | 0.58  | -6.2 | 1.69208 | none |
| TMEM109   | -0.102 | -0.0772 | -0.849 | 0.41633 | 0.58  | -6.2 | 1.09979 | none |
| MEIOB     | 0.064  | 0.0638  | 0.849  | 0.41645 | 0.58  | -6.2 | 1.23395 | none |
| IQCA1L    | 0.086  | 0.0995  | 0.8486 | 0.41663 | 0.581 | -6.2 | -0.0882 | none |
| C17ORF58  | -0.172 | -0.0798 | -0.849 | 0.41663 | 0.581 | -6.2 | 1.12499 | none |
| GALNT2    | 0.133  | 0.168   | 0.8486 | 0.41664 | 0.581 | -6.2 | 0.35039 | none |
| ANKRD36E  | 0.138  | 0.0348  | 0.8485 | 0.41671 | 0.581 | -6.2 | 0.11074 | none |
| BRWD3     | 0.176  | 0.2666  | 0.8481 | 0.41693 | 0.581 | -6.2 | 0.77058 | none |
| LDHC      | 0.151  | 0.0298  | 0.8474 | 0.4173  | 0.581 | -6.2 | -0.7064 | none |
| ERICH4    | 0.076  | 0.0757  | 0.8468 | 0.41761 | 0.582 | -6.2 | -0.4532 | none |
| SLC28A1   | -0.09  | -0.0981 | -0.847 | 0.41767 | 0.582 | -6.2 | -0.2481 | none |
| DRG2      | 0.072  | 0.0801  | 0.8466 | 0.41769 | 0.582 | -6.2 | 1.22965 | none |
| GH2       | -0.074 | -0.0738 | -0.847 | 0.41771 | 0.582 | -6.2 | 0.54647 | none |
| ARMCX4    | -0.126 | -0.1275 | -0.846 | 0.41782 | 0.582 | -6.2 | 0.61106 | none |
| PSKH2     | 0.076  | 0.0756  | 0.8463 | 0.41784 | 0.582 | -6.2 | 0.20449 | none |
| ZNF282    | -0.136 | 0.0561  | -0.846 | 0.41807 | 0.582 | -6.2 | 0.87759 | none |
| TFPT      | -0.142 | -0.1015 | -0.846 | 0.41811 | 0.582 | -6.2 | 0.89575 | none |
| LEF1      | 0.108  | 0.0853  | 0.8455 | 0.41828 | 0.582 | -6.2 | 0.828   | none |
| CWH43     | 0.11   | 0.1178  | 0.8454 | 0.41835 | 0.582 | -6.2 | 0.44006 | none |
| DLL1      | 0.083  | 0.1135  | 0.8452 | 0.41844 | 0.582 | -6.2 | -0.2292 | none |
| KLHL15    | 0.074  | 0.0043  | 0.8451 | 0.41852 | 0.583 | -6.2 | -0.1547 | none |
| CACNG7    | 0.092  | 0.0342  | 0.845  | 0.41857 | 0.583 | -6.2 | 0.1585  | none |
| SPATA20   | 0.104  | 0.1306  | 0.8448 | 0.41869 | 0.583 | -6.2 | 1.14419 | none |
| DACT1     | 0.061  | 0.0364  | 0.8447 | 0.41874 | 0.583 | -6.2 | 1.22627 | none |
| DYDC2     | 0.11   | 0.0661  | 0.8446 | 0.41877 | 0.583 | -6.2 | -0.7302 | none |
| MYC       | 0.113  | 0.1986  | 0.8445 | 0.41881 | 0.583 | -6.2 | 1.02606 | none |
| ALG10     | -0.141 | -0.1585 | -0.844 | 0.41898 | 0.583 | -6.2 | 1.66887 | none |
| TNFSF12-T | -0.094 | -0.1153 | -0.844 | 0.4191  | 0.583 | -6.2 | 1.12064 | none |
| THBS1     | 0.095  | 0.1041  | 0.8439 | 0.41912 | 0.583 | -6.2 | 0.65511 | none |
| SLC9B2    | 0.084  | 0.0461  | 0.8439 | 0.41913 | 0.583 | -6.2 | -0.2132 | none |
| CXCL13    | -0.153 | -0.1642 | -0.844 | 0.41931 | 0.583 | -6.2 | 0.50744 | none |
| TAS2R14   | -0.061 | -0.0507 | -0.843 | 0.41936 | 0.583 | -6.2 | 1.65485 | none |
| TUBAL3    | -0.072 | -0.0598 | -0.843 | 0.41937 | 0.583 | -6.2 | 0.10949 | none |
| ARHGAP3C  | 0.191  | 0.2771  | 0.8435 | 0.41937 | 0.583 | -6.2 | 0.44409 | none |
| SSU72     | -0.082 | -0.1147 | -0.843 | 0.41938 | 0.583 | -6.2 | 0.18389 | none |
| NSA2      | 0.125  | 0.0744  | 0.8435 | 0.41938 | 0.583 | -6.2 | -0.6973 | none |
| MS4A6E    | 0.075  | 0.0751  | 0.8435 | 0.41938 | 0.583 | -6.2 | 0.66005 | none |
| NDUFAF2   | 0.203  | 0.1287  | 0.8434 | 0.41943 | 0.583 | -6.2 | -0.0458 | none |

|          |        |         |        |         |       |       |         |      |
|----------|--------|---------|--------|---------|-------|-------|---------|------|
| KRT16    | 0.1    | 0.1108  | 0.8433 | 0.41945 | 0.583 | -6.2  | 0.16877 | none |
| KCNC4    | 0.251  | 0.1805  | 0.8433 | 0.41947 | 0.583 | -6.2  | 0.41535 | none |
| CHRM1    | 0.071  | 0.0792  | 0.8431 | 0.41959 | 0.583 | -6.2  | 0.56499 | none |
| IL15     | -0.075 | -0.0077 | -0.843 | 0.41965 | 0.583 | -6.2  | 1.59178 | none |
| OR9I1    | 0.059  | 0.0594  | 0.8428 | 0.41971 | 0.583 | -6.2  | -0.2365 | none |
| ACD      | 0.094  | 0.1124  | 0.8426 | 0.41983 | 0.583 | -6.2  | -0.0765 | none |
| FSTL5    | 0.089  | 0.0829  | 0.8423 | 0.41999 | 0.583 | -6.2  | 1.15012 | none |
| F5       | 0.323  | 0.5375  | 0.842  | 0.42013 | 0.583 | -6.2  | 0.31248 | none |
| PKLR     | 0.058  | 0.0582  | 0.842  | 0.42014 | 0.583 | -6.2  | 0       | none |
| WDR81    | 0.135  | 0.2339  | 0.842  | 0.42018 | 0.583 | -6.2  | 0.39984 | none |
| PID1     | 0.208  | 0.1519  | 0.8419 | 0.4202  | 0.583 | -6.2  | 1.46357 | none |
| LRRC9    | 0.07   | 0.0721  | 0.8415 | 0.42043 | 0.584 | -6.2  | -0.6112 | none |
| CRYBA1   | 0.083  | 0.0822  | 0.8415 | 0.42044 | 0.584 | -6.2  | 1.28545 | none |
| SLC25A11 | -0.106 | -0.0845 | -0.841 | 0.42045 | 0.584 | -6.2  | 1.37057 | none |
| EMP3     | -0.116 | -0.1568 | -0.841 | 0.42063 | 0.584 | -6.2  | 1.4972  | none |
| INSRR    | 0.062  | 0.0542  | 0.8409 | 0.42075 | 0.584 | -6.2  | -1.0215 | none |
| WDR63    | 0.075  | 0.0748  | 0.8408 | 0.42078 | 0.584 | -6.2  | -0.8743 | none |
| TMEM151  | 0.061  | 0.0608  | 0.8408 | 0.4208  | 0.584 | -6.2  | 0.15445 | none |
| C10ORF12 | 0.075  | 0.0746  | 0.8406 | 0.42092 | 0.584 | -6.2  | -0.4083 | none |
| ZNF207   | -0.082 | -0.0927 | -0.84  | 0.421   | 0.584 | -6.2  | 1.98633 | none |
| STXBP2   | 0.115  | 0.1382  | 0.8403 | 0.42105 | 0.584 | -6.2  | -0.2775 | none |
| ILVBL    | -0.126 | -0.1371 | -0.84  | 0.42131 | 0.584 | -6.21 | 0.85497 | none |
| SFRP2    | -0.058 | -0.0552 | -0.84  | 0.42132 | 0.584 | -6.21 | 0.05211 | none |
| SLC26A10 | -0.116 | -0.1164 | -0.84  | 0.42136 | 0.584 | -6.21 | 0.41959 | none |
| SYT1     | -0.078 | -0.0779 | -0.84  | 0.42138 | 0.584 | -6.21 | 0.53951 | none |
| JMJD6    | -0.101 | 0.0017  | -0.84  | 0.42143 | 0.584 | -6.21 | 1.65039 | none |
| ADGRF2   | 0.071  | 0.0508  | 0.8395 | 0.42151 | 0.584 | -6.21 | -1.1142 | none |
| TPD52L2  | -0.059 | -0.0151 | -0.839 | 0.42152 | 0.584 | -6.21 | 0.81304 | none |
| DPEP3    | 0.068  | 0.0817  | 0.8393 | 0.42157 | 0.584 | -6.21 | 0.56527 | none |
| CD40LG   | -0.109 | -0.1053 | -0.839 | 0.42158 | 0.584 | -6.21 | 0.17888 | none |
| CXCL10   | 0.086  | 0.0981  | 0.8393 | 0.42159 | 0.584 | -6.21 | 0.92767 | none |
| TMEM100  | 0.074  | 0.0743  | 0.8391 | 0.42169 | 0.585 | -6.21 | -0.5512 | none |
| LHX5     | -0.073 | -0.0732 | -0.839 | 0.42171 | 0.585 | -6.21 | 0.94872 | none |
| AKR1C2   | 0.142  | 0.0912  | 0.839  | 0.42176 | 0.585 | -6.21 | -0.11   | none |
| GLRX2    | -0.142 | -0.183  | -0.839 | 0.42178 | 0.585 | -6.21 | 0.54592 | none |
| PAGE2    | 0.074  | 0.0743  | 0.8389 | 0.4218  | 0.585 | -6.21 | 1.19688 | none |
| FIBIN    | 0.057  | 0.057   | 0.8387 | 0.4219  | 0.585 | -6.21 | 0       | none |
| PRSS57   | 0.069  | 0.0402  | 0.8386 | 0.42197 | 0.585 | -6.21 | -0.5976 | none |
| OR2T10   | -0.057 | -0.0379 | -0.839 | 0.422   | 0.585 | -6.21 | 0.311   | none |
| ACTR10   | 0.142  | 0.022   | 0.8383 | 0.42214 | 0.585 | -6.21 | -0.7482 | none |

|           |        |         |        |         |       |       |         |            |
|-----------|--------|---------|--------|---------|-------|-------|---------|------------|
| KRT13     | -0.07  | -0.0704 | -0.838 | 0.42216 | 0.585 | -6.21 | 1.54273 | none       |
| FAM72C    | 0.227  | 0.237   | 0.8381 | 0.42222 | 0.585 | -6.21 | 1.12447 | none       |
| PLAU      | 0.07   | 0.1398  | 0.8379 | 0.42236 | 0.585 | -6.21 | 0.06148 | none       |
| C11ORF53  | -0.059 | -0.0504 | -0.838 | 0.42237 | 0.585 | -6.21 | 0       | none       |
| HIST1H2AI | -0.119 | -0.123  | -0.838 | 0.4224  | 0.585 | -6.21 | 1.26822 | none       |
| LYSMD2    | 0.165  | 0.1473  | 0.8377 | 0.42244 | 0.585 | -6.21 | 0.60821 | none       |
| CLPS      | -0.291 | -0.2615 | -0.838 | 0.42253 | 0.585 | -6.21 | 2.16009 | AA-related |
| KIF7      | 0.125  | 0.1404  | 0.8375 | 0.42256 | 0.585 | -6.21 | 1.07954 | none       |
| SUSD4     | 0.147  | 0.0767  | 0.8374 | 0.42259 | 0.585 | -6.21 | 0.20577 | none       |
| RESP18    | -0.057 | -0.0378 | -0.837 | 0.42259 | 0.585 | -6.21 | 0       | none       |
| FBXL16    | 0.089  | 0.1183  | 0.8374 | 0.42262 | 0.585 | -6.21 | 0.11337 | none       |
| DMRTC2    | 0.125  | 0.1248  | 0.8372 | 0.42272 | 0.585 | -6.21 | -0.0128 | none       |
| TNFAIP6   | -0.126 | -0.0369 | -0.837 | 0.4228  | 0.585 | -6.21 | 0.74295 | none       |
| MED21     | -0.144 | -0.2475 | -0.837 | 0.42293 | 0.585 | -6.21 | -0.275  | none       |
| BCL2L2    | 0.079  | 0.0815  | 0.8364 | 0.42314 | 0.585 | -6.21 | -0.2218 | none       |
| FKBP8     | -0.107 | -0.0249 | -0.836 | 0.42328 | 0.586 | -6.21 | 0.1474  | none       |
| ADAMTS1   | -0.089 | -0.0373 | -0.836 | 0.42352 | 0.586 | -6.21 | 0.63198 | none       |
| TGFBI     | 0.076  | 0.0737  | 0.8354 | 0.42366 | 0.586 | -6.21 | -0.3877 | none       |
| DRD2      | -0.129 | -0.1242 | -0.835 | 0.42373 | 0.586 | -6.21 | -0.6467 | none       |
| TAF5      | 0.097  | 0.1399  | 0.8352 | 0.42378 | 0.586 | -6.21 | 0.17213 | none       |
| WDR43     | 0.179  | 0.2598  | 0.8349 | 0.42396 | 0.586 | -6.21 | 0.4082  | none       |
| ACSM6     | 0.108  | 0.0797  | 0.8348 | 0.42402 | 0.586 | -6.21 | 0.06393 | none       |
| TBC1D13   | 0.093  | 0.1133  | 0.8346 | 0.42411 | 0.586 | -6.21 | 0.72896 | none       |
| TTC4      | -0.07  | -0.0578 | -0.835 | 0.42412 | 0.586 | -6.21 | 0.3885  | none       |
| KRTAP5-1  | -0.164 | -0.047  | -0.834 | 0.42448 | 0.587 | -6.21 | 0.64607 | none       |
| SUGT1     | -0.063 | -0.0729 | -0.834 | 0.42452 | 0.587 | -6.21 | 0.75911 | none       |
| CMTM6     | -0.109 | -0.1907 | -0.834 | 0.42459 | 0.587 | -6.21 | 1.34791 | none       |
| KRTAP8-1  | 0.073  | 0.0734  | 0.8337 | 0.42461 | 0.587 | -6.21 | 1.19688 | none       |
| HMGB4     | -0.072 | -0.0715 | -0.833 | 0.42481 | 0.587 | -6.21 | 0.86537 | none       |
| OR1S2     | -0.072 | -0.0715 | -0.833 | 0.42485 | 0.587 | -6.21 | -0.3212 | none       |
| ZNF365    | 0.108  | 0.1     | 0.8331 | 0.42493 | 0.587 | -6.21 | 1.67828 | none       |
| TNNI3     | -0.068 | -0.0675 | -0.833 | 0.42501 | 0.587 | -6.21 | 1.15491 | none       |
| FBXW9     | -0.083 | -0.042  | -0.833 | 0.42504 | 0.587 | -6.21 | 1.54048 | none       |
| GPR162    | -0.056 | -0.0384 | -0.833 | 0.42509 | 0.587 | -6.21 | 1.49424 | none       |
| KLF15     | -0.081 | -0.0851 | -0.833 | 0.42511 | 0.587 | -6.21 | -0.3472 | none       |
| DAPK1     | -0.171 | -0.0946 | -0.833 | 0.42516 | 0.587 | -6.21 | 0.63592 | none       |
| CCL2      | -0.07  | -0.0932 | -0.832 | 0.42526 | 0.587 | -6.21 | 0.88525 | none       |
| FGA       | -0.092 | -0.1005 | -0.832 | 0.42564 | 0.588 | -6.21 | 0.71948 | none       |
| OR5B21    | -0.114 | -0.08   | -0.831 | 0.42591 | 0.588 | -6.21 | -0.5298 | none       |
| MPC1L     | -0.065 | -0.0683 | -0.831 | 0.42592 | 0.588 | -6.21 | 1.5055  | none       |

|          |        |         |        |         |       |       |         |      |
|----------|--------|---------|--------|---------|-------|-------|---------|------|
| PARP1    | 0.225  | 0.3826  | 0.8309 | 0.42608 | 0.588 | -6.21 | 0.32191 | none |
| CPEB4    | 0.192  | 0.1784  | 0.8309 | 0.42611 | 0.588 | -6.21 | 0.41587 | none |
| XPNPEP1  | 0.088  | 0.1245  | 0.8307 | 0.4262  | 0.588 | -6.21 | 0.42783 | none |
| ASGR2    | -0.1   | -0.0563 | -0.831 | 0.4262  | 0.588 | -6.21 | 1.45651 | none |
| ZNF576   | 0.118  | 0.0314  | 0.8304 | 0.42635 | 0.588 | -6.21 | -0.0103 | none |
| CRTAC1   | 0.101  | 0.1009  | 0.8301 | 0.42651 | 0.589 | -6.21 | 0.13446 | none |
| SWI5     | -0.113 | -0.1083 | -0.83  | 0.42664 | 0.589 | -6.21 | 1.10291 | none |
| XAGE1B   | -0.071 | -0.071  | -0.83  | 0.42664 | 0.589 | -6.21 | -0.1025 | none |
| JPH3     | -0.071 | -0.076  | -0.83  | 0.42671 | 0.589 | -6.21 | -0.194  | none |
| HDDC2    | 0.072  | 0.0426  | 0.8295 | 0.42686 | 0.589 | -6.21 | -0.8884 | none |
| PSG9     | -0.056 | -0.0558 | -0.829 | 0.42688 | 0.589 | -6.21 | -0.271  | none |
| MTM1     | -0.165 | -0.1516 | -0.829 | 0.42698 | 0.589 | -6.21 | 0.85614 | none |
| U2AF2    | -0.112 | -0.0256 | -0.829 | 0.42704 | 0.589 | -6.21 | 0.09909 | none |
| FANCF    | 0.064  | 0.0065  | 0.8291 | 0.4271  | 0.589 | -6.21 | 0.12751 | none |
| FASTKD3  | -0.133 | -0.2023 | -0.829 | 0.42721 | 0.589 | -6.21 | 0.80695 | none |
| AQP3     | -0.127 | -0.1809 | -0.829 | 0.42727 | 0.589 | -6.21 | 1.75153 | none |
| MS4A8    | 0.083  | 0.0827  | 0.8285 | 0.42739 | 0.589 | -6.21 | -0.0605 | none |
| CPN2     | 0.061  | 0.0618  | 0.8285 | 0.42739 | 0.589 | -6.21 | 1.39219 | none |
| IGFBP1   | -0.127 | -0.1545 | -0.828 | 0.42739 | 0.589 | -6.21 | 0.37427 | none |
| HMGNA4   | 0.099  | -0.016  | 0.8283 | 0.42752 | 0.589 | -6.21 | 0.8431  | none |
| CACNA1B  | -0.094 | -0.0946 | -0.828 | 0.42762 | 0.589 | -6.21 | 0.40959 | none |
| PNLDC1   | -0.081 | -0.0386 | -0.828 | 0.42767 | 0.589 | -6.22 | 0.80142 | none |
| COPE     | -0.09  | -0.0511 | -0.828 | 0.42782 | 0.59  | -6.22 | 0.33683 | none |
| ZNF658   | -0.216 | -0.0843 | -0.828 | 0.42787 | 0.59  | -6.22 | 0.50457 | none |
| SSR1     | 0.084  | -0.0194 | 0.8273 | 0.42802 | 0.59  | -6.22 | -0.4987 | none |
| BMI1     | 0.139  | 0.0891  | 0.8269 | 0.42826 | 0.59  | -6.22 | -0.5928 | none |
| RHOXF1   | -0.069 | -0.0704 | -0.827 | 0.42831 | 0.59  | -6.22 | 0.88887 | none |
| TK2      | -0.075 | -0.067  | -0.827 | 0.42832 | 0.59  | -6.22 | 0.89034 | none |
| PSAP     | -0.086 | -0.1044 | -0.827 | 0.4284  | 0.59  | -6.22 | 1.21503 | none |
| BEX3     | -0.156 | -0.1704 | -0.827 | 0.42841 | 0.59  | -6.22 | 0.40882 | none |
| TMEM14A  | -0.153 | -0.2578 | -0.827 | 0.42845 | 0.59  | -6.22 | 0.89367 | none |
| TEX26    | -0.07  | -0.0703 | -0.826 | 0.42866 | 0.59  | -6.22 | 0.88916 | none |
| FAM89A   | -0.139 | -0.1306 | -0.826 | 0.42869 | 0.59  | -6.22 | -0.1694 | none |
| CARNS1   | 0.14   | 0.1183  | 0.826  | 0.42873 | 0.59  | -6.22 | 0.00443 | none |
| SEC16B   | -0.055 | -0.0309 | -0.826 | 0.42878 | 0.59  | -6.22 | -0.2364 | none |
| CDCA4    | -0.125 | -0.0645 | -0.826 | 0.42886 | 0.59  | -6.22 | 1.96944 | none |
| KHSRP    | 0.176  | 0.2597  | 0.8253 | 0.42914 | 0.591 | -6.22 | 0.37302 | none |
| SERPINF2 | 0.074  | 0.0781  | 0.8248 | 0.4294  | 0.591 | -6.22 | 1.29741 | none |
| SLC18A3  | -0.057 | -0.0389 | -0.825 | 0.42948 | 0.591 | -6.22 | 0.03385 | none |
| FICD     | 0.131  | 0.1816  | 0.8246 | 0.42952 | 0.591 | -6.22 | 0.46424 | none |

|          |        |         |        |         |       |       |         |            |
|----------|--------|---------|--------|---------|-------|-------|---------|------------|
| NUDT21   | 0.115  | -0.0202 | 0.8243 | 0.42968 | 0.591 | -6.22 | 0.51329 | none       |
| MCF2     | -0.062 | -0.0422 | -0.824 | 0.42973 | 0.591 | -6.22 | -0.442  | none       |
| PLXNA1   | -0.166 | #####   | -0.824 | 0.42997 | 0.592 | -6.22 | 0.88062 | none       |
| DIRAS3   | -0.071 | -0.0263 | -0.824 | 0.43    | 0.592 | -6.22 | 1.59485 | none       |
| TIMM17B  | 0.133  | 0.0256  | 0.8237 | 0.43    | 0.592 | -6.22 | -0.3681 | none       |
| RAD54B   | -0.144 | -0.0888 | -0.824 | 0.43006 | 0.592 | -6.22 | 0.3674  | none       |
| TREML4   | 0.078  | 0.0757  | 0.8229 | 0.43042 | 0.592 | -6.22 | 1.62775 | none       |
| USP17L20 | 0.08   | 0.084   | 0.8225 | 0.43065 | 0.592 | -6.22 | 1.41237 | none       |
| DLAT     | -0.14  | -0.0631 | -0.822 | 0.43091 | 0.593 | -6.22 | 2.06144 | none       |
| PPIAL4C  | -0.105 | -0.1296 | -0.822 | 0.43102 | 0.593 | -6.22 | 0.84053 | none       |
| TMED5    | 0.122  | 0.0476  | 0.8215 | 0.43119 | 0.593 | -6.22 | 1.09899 | none       |
| STK38    | 0.11   | 0.1259  | 0.8212 | 0.43131 | 0.593 | -6.22 | 1.22498 | none       |
| YIPF1    | -0.112 | -0.1297 | -0.821 | 0.43132 | 0.593 | -6.22 | 0.29825 | none       |
| NKX2-1   | 0.07   | 0.0666  | 0.821  | 0.43144 | 0.593 | -6.22 | 0.5764  | none       |
| STAC     | 0.113  | 0.1169  | 0.821  | 0.43148 | 0.593 | -6.22 | 0.37861 | none       |
| ACVR2A   | 0.216  | 0.1665  | 0.8209 | 0.43153 | 0.593 | -6.22 | -0.765  | none       |
| SLX1A    | 0.149  | 0.0729  | 0.8207 | 0.43161 | 0.593 | -6.22 | 0.33332 | none       |
| TP53TG3C | -0.059 | -0.0349 | -0.821 | 0.43169 | 0.593 | -6.22 | 1.27997 | none       |
| CKLF-CMT | 0.24   | 0.2298  | 0.8202 | 0.43189 | 0.593 | -6.22 | 0.36639 | none       |
| RGS9BP   | 0.056  | 0.0443  | 0.8201 | 0.43191 | 0.593 | -6.22 | -1.1162 | none       |
| AGAP3    | 0.116  | 0.2738  | 0.8199 | 0.43203 | 0.594 | -6.22 | 0.59389 | none       |
| DRD5     | 0.057  | 0.039   | 0.8196 | 0.43219 | 0.594 | -6.22 | 1.5649  | none       |
| ASIC2    | -0.096 | -0.0742 | -0.819 | 0.4323  | 0.594 | -6.22 | 0.07474 | none       |
| ZDHC16   | -0.114 | -0.1383 | -0.819 | 0.4325  | 0.594 | -6.22 | 1.53243 | none       |
| WASF2    | 0.118  | 0.1778  | 0.819  | 0.43256 | 0.594 | -6.22 | -0.1071 | none       |
| CIB4     | 0.071  | 0.0709  | 0.8189 | 0.43261 | 0.594 | -6.22 | -0.6397 | none       |
| TIGD2    | 0.094  | 0.0444  | 0.8185 | 0.43278 | 0.594 | -6.22 | 1.17142 | none       |
| RNF138   | -0.25  | -0.2441 | -0.818 | 0.43282 | 0.594 | -6.22 | 1.8461  | none       |
| AL513523 | 0.062  | 0.0632  | 0.8183 | 0.4329  | 0.594 | -6.22 | -0.0092 | none       |
| MALRD1   | -0.07  | -0.0682 | -0.818 | 0.43297 | 0.594 | -6.22 | 2.10187 | AA-related |
| DCLRE1B  | 0.086  | 0.0616  | 0.8176 | 0.43327 | 0.595 | -6.22 | 1.39292 | none       |
| CELA1    | 0.069  | 0.0707  | 0.8176 | 0.43328 | 0.595 | -6.22 | -0.6538 | none       |
| SNAP25   | -0.07  | -0.0698 | -0.817 | 0.43342 | 0.595 | -6.22 | 2.14624 | AA-related |
| HNRNPUL1 | 0.182  | 0.258   | 0.8174 | 0.43342 | 0.595 | -6.22 | 0.56954 | none       |
| LRP6     | -0.115 | 0.0109  | -0.817 | 0.43352 | 0.595 | -6.22 | -0.0296 | none       |
| CXORF65  | 0.134  | 0.2413  | 0.8171 | 0.43357 | 0.595 | -6.22 | 0.78536 | none       |
| TFCP2    | 0.125  | 0.1554  | 0.8168 | 0.43373 | 0.595 | -6.22 | -0.0153 | none       |
| LRRC75B  | 0.092  | 0.1451  | 0.8166 | 0.43383 | 0.595 | -6.22 | 1.20164 | none       |
| AUP1     | -0.106 | -0.0796 | -0.817 | 0.43389 | 0.595 | -6.22 | 0.43033 | none       |
| MYL7     | 0.092  | 0.086   | 0.8157 | 0.43431 | 0.596 | -6.23 | 0.32408 | none       |

|         |        |         |        |         |       |       |         |      |
|---------|--------|---------|--------|---------|-------|-------|---------|------|
| PIGC    | -0.107 | -0.1691 | -0.815 | 0.43448 | 0.596 | -6.23 | 1.20797 | none |
| ANXA8L1 | 0.06   | 0.0669  | 0.8153 | 0.43453 | 0.596 | -6.23 | -0.0602 | none |
| LENG9   | 0.102  | 0.0796  | 0.8153 | 0.43457 | 0.596 | -6.23 | 0.30813 | none |
| LGALS12 | 0.064  | 0.0388  | 0.8147 | 0.43486 | 0.596 | -6.23 | -0.9235 | none |
| FMO1    | 0.069  | 0.075   | 0.8144 | 0.43506 | 0.597 | -6.23 | -0.6417 | none |
| OR10J5  | -0.068 | -0.0684 | -0.814 | 0.43519 | 0.597 | -6.23 | 0.47745 | none |
| TMC3    | 0.067  | 0.0515  | 0.8137 | 0.4354  | 0.597 | -6.23 | -0.6032 | none |
| CREBL2  | -0.079 | -0.1134 | -0.813 | 0.43559 | 0.597 | -6.23 | 1.27258 | none |
| SSH3    | 0.111  | 0.1488  | 0.8128 | 0.43592 | 0.598 | -6.23 | 0.50861 | none |
| STIM2   | 0.164  | 0.192   | 0.8125 | 0.43609 | 0.598 | -6.23 | 0.79499 | none |
| ZC3H11A | 0.206  | 0.2963  | 0.8124 | 0.43613 | 0.598 | -6.23 | -0.1239 | none |
| MET     | 0.149  | 0.1275  | 0.8123 | 0.43621 | 0.598 | -6.23 | -0.2525 | none |
| ITGBL1  | 0.08   | 0.0838  | 0.8119 | 0.43639 | 0.598 | -6.23 | 1.30831 | none |
| MAOA    | 0.105  | 0.1579  | 0.8118 | 0.43645 | 0.598 | -6.23 | 0.44433 | none |
| BHLHE23 | -0.055 | -0.0364 | -0.811 | 0.43709 | 0.599 | -6.23 | 0       | none |
| FST     | 0.08   | 0.083   | 0.8104 | 0.43722 | 0.599 | -6.23 | -0.5016 | none |
| GDF9    | 0.14   | 0.0838  | 0.8103 | 0.43728 | 0.599 | -6.23 | -0.3939 | none |
| EHD3    | 0.088  | 0.0882  | 0.8102 | 0.43733 | 0.599 | -6.23 | 0.41456 | none |
| RIC1    | 0.12   | 0.1552  | 0.8099 | 0.43751 | 0.599 | -6.23 | -0.086  | none |
| KCNIP3  | -0.097 | -0.0789 | -0.81  | 0.4377  | 0.599 | -6.23 | 1.57578 | none |
| TSLP    | 0.055  | 0.0563  | 0.8092 | 0.43789 | 0.6   | -6.23 | -0.4061 | none |
| CCDC160 | -0.068 | -0.0567 | -0.809 | 0.43792 | 0.6   | -6.23 | 0.2096  | none |
| PARL    | -0.096 | -0.0948 | -0.809 | 0.43793 | 0.6   | -6.23 | 0.49258 | none |
| UBE2H   | 0.188  | 0.1194  | 0.8089 | 0.43808 | 0.6   | -6.23 | -0.1209 | none |
| ZW10    | -0.08  | -0.0432 | -0.808 | 0.43829 | 0.6   | -6.23 | 1.53464 | none |
| IMPDH1  | 0.077  | 0.1209  | 0.8078 | 0.43868 | 0.601 | -6.23 | 0.58356 | none |
| ALCAM   | 0.198  | 0.2856  | 0.8076 | 0.43879 | 0.601 | -6.23 | -0.3397 | none |
| TOB1    | 0.076  | 0.019   | 0.8075 | 0.43884 | 0.601 | -6.23 | -1.0309 | none |
| SPTLC3  | 0.145  | 0.1742  | 0.8073 | 0.43894 | 0.601 | -6.23 | 0.25676 | none |
| ZNF704  | 0.101  | 0.1004  | 0.8071 | 0.43906 | 0.601 | -6.23 | -0.6482 | none |
| PLN     | -0.054 | -0.0406 | -0.807 | 0.43931 | 0.601 | -6.23 | 1.77964 | none |
| CD109   | 0.128  | 0.0645  | 0.8066 | 0.43932 | 0.601 | -6.23 | -0.4654 | none |
| LRRC39  | -0.06  | -0.0538 | -0.807 | 0.43932 | 0.601 | -6.23 | 0.31497 | none |
| POP7    | -0.101 | -0.0943 | -0.806 | 0.43942 | 0.601 | -6.23 | 0.64345 | none |
| ITPA    | -0.091 | -0.0953 | -0.806 | 0.43945 | 0.601 | -6.23 | 0.70392 | none |
| CYGB    | 0.084  | 0.1034  | 0.8063 | 0.43948 | 0.601 | -6.23 | 1.39319 | none |
| HBE1    | 0.069  | 0.0688  | 0.8058 | 0.43975 | 0.601 | -6.23 | -0.3054 | none |
| VPS35   | 0.077  | 0.0283  | 0.8057 | 0.4398  | 0.601 | -6.23 | 0.67499 | none |
| ZNHIT1  | -0.123 | -0.1638 | -0.806 | 0.43988 | 0.602 | -6.23 | 1.27754 | none |
| RUNX1T1 | -0.067 | -0.065  | -0.805 | 0.44011 | 0.602 | -6.23 | 1.7084  | none |



|           |        |         |        |         |       |       |         |            |
|-----------|--------|---------|--------|---------|-------|-------|---------|------------|
| SF3A1     | 0.2    | 0.3537  | 0.8051 | 0.44014 | 0.602 | -6.23 | 0.86163 | none       |
| MINPP1    | -0.095 | -0.0821 | -0.805 | 0.4402  | 0.602 | -6.23 | 2.1967  | AA-related |
| NRM       | 0.091  | 0.0585  | 0.8049 | 0.44023 | 0.602 | -6.23 | 0.39288 | none       |
| ZNF324B   | 0.104  | 0.1939  | 0.8048 | 0.44031 | 0.602 | -6.23 | 1.63124 | none       |
| C1QTNF5   | 0.069  | 0.0686  | 0.8047 | 0.44036 | 0.602 | -6.23 | 0.24127 | none       |
| PDCD4     | 0.118  | 0.0925  | 0.8044 | 0.44052 | 0.602 | -6.23 | 0.62486 | none       |
| GLI3      | -0.118 | -0.1174 | -0.804 | 0.44054 | 0.602 | -6.23 | -0.4616 | none       |
| LRRRC23   | 0.234  | 0.1277  | 0.8042 | 0.44062 | 0.602 | -6.23 | -0.3394 | none       |
| MYRFL     | 0.059  | 0.06    | 0.8039 | 0.44082 | 0.602 | -6.23 | -0.7584 | none       |
| TLR1      | -0.129 | -0.0887 | -0.804 | 0.44086 | 0.602 | -6.23 | 0.43771 | none       |
| RHOBTB1   | -0.072 | -0.0911 | -0.804 | 0.44088 | 0.602 | -6.24 | 0.7922  | none       |
| CLEC4D    | 0.069  | 0.0685  | 0.8037 | 0.44089 | 0.602 | -6.24 | 1.19405 | none       |
| SMYD3     | 0.128  | 0.1293  | 0.8036 | 0.44096 | 0.602 | -6.24 | 0.88771 | none       |
| PAH       | 0.098  | 0.151   | 0.8035 | 0.44103 | 0.602 | -6.24 | -0.2084 | none       |
| BTG1      | 0.1    | 0.0573  | 0.803  | 0.44127 | 0.603 | -6.24 | -0.7139 | none       |
| WAS       | 0.121  | 0.0974  | 0.8029 | 0.44138 | 0.603 | -6.24 | -0.2052 | none       |
| ZYX       | -0.084 | -0.0567 | -0.803 | 0.44144 | 0.603 | -6.24 | 0.36924 | none       |
| MLLT1     | 0.202  | 0.3428  | 0.8026 | 0.44149 | 0.603 | -6.24 | -0.0674 | none       |
| CAMLG     | -0.102 | -0.1557 | -0.802 | 0.44174 | 0.603 | -6.24 | 1.10051 | none       |
| KRTAP10-1 | -0.054 | -0.0359 | -0.802 | 0.44182 | 0.603 | -6.24 | 0       | none       |
| SLC27A6   | 0.061  | 0.0664  | 0.8019 | 0.44188 | 0.603 | -6.24 | 0       | none       |
| MANBAL    | 0.081  | 0.0434  | 0.8019 | 0.4419  | 0.603 | -6.24 | 0.04138 | none       |
| ANKRD2    | -0.066 | -0.0149 | -0.802 | 0.4419  | 0.603 | -6.24 | 0.12555 | none       |
| RAPGEF1   | 0.2    | 0.3652  | 0.8019 | 0.44192 | 0.603 | -6.24 | 0.0042  | none       |
| ARHGAP33  | 0.106  | 0.0669  | 0.8018 | 0.44195 | 0.603 | -6.24 | 0.35199 | none       |
| ASB15     | -0.068 | -0.0671 | -0.802 | 0.44202 | 0.603 | -6.24 | 1.83911 | none       |
| CRYGB     | -0.067 | -0.0665 | -0.802 | 0.44205 | 0.603 | -6.24 | 1.9054  | none       |
| TTC37     | 0.272  | 0.3316  | 0.8016 | 0.44207 | 0.603 | -6.24 | 0.28181 | none       |
| SERGEF    | -0.109 | -0.14   | -0.802 | 0.44212 | 0.603 | -6.24 | 1.09497 | none       |
| FAIM2     | 0.191  | 0.1787  | 0.8013 | 0.44224 | 0.603 | -6.24 | 0.43205 | none       |
| COMMD3-1  | -0.1   | -0.0995 | -0.801 | 0.44232 | 0.603 | -6.24 | 0.9439  | none       |
| PLPP1     | 0.117  | 0.0618  | 0.8011 | 0.44235 | 0.603 | -6.24 | 0.47981 | none       |
| NFIX      | 0.074  | 0.1018  | 0.8008 | 0.4425  | 0.603 | -6.24 | -0.2694 | none       |
| GLRX5     | -0.135 | -0.1455 | -0.801 | 0.44253 | 0.603 | -6.24 | 0.79736 | none       |
| PPY       | 0.144  | 0.0712  | 0.8007 | 0.44256 | 0.603 | -6.24 | -0.1477 | none       |
| GOLGA8J   | 0.098  | 0.061   | 0.8006 | 0.44262 | 0.603 | -6.24 | -0.6537 | none       |
| APOBEC3F  | -0.157 | -0.1336 | -0.8   | 0.44296 | 0.604 | -6.24 | 0.82868 | none       |
| SLC35G5   | -0.06  | -0.0134 | -0.799 | 0.44334 | 0.604 | -6.24 | 1.64961 | none       |
| HIST3H2A  | -0.12  | -0.0897 | -0.799 | 0.44337 | 0.604 | -6.24 | 1.40935 | none       |
| CANT1     | 0.167  | 0.1494  | 0.7991 | 0.44344 | 0.604 | -6.24 | -0.6028 | none       |

|           |        |         |        |         |       |       |         |      |
|-----------|--------|---------|--------|---------|-------|-------|---------|------|
| KRTAP12-1 | 0.068  | 0.0677  | 0.7991 | 0.44345 | 0.604 | -6.24 | 1.19688 | none |
| ADGB      | 0.086  | 0.067   | 0.7991 | 0.44346 | 0.604 | -6.24 | 0.06546 | none |
| AMTN      | -0.066 | -0.0662 | -0.799 | 0.44351 | 0.604 | -6.24 | 0.88916 | none |
| IFNA13    | -0.066 | -0.0661 | -0.799 | 0.44362 | 0.604 | -6.24 | 1.9054  | none |
| TSSK1B    | 0.06   | 0.0477  | 0.7987 | 0.44365 | 0.604 | -6.24 | -0.3303 | none |
| NR5A1     | -0.057 | -0.0291 | -0.799 | 0.4437  | 0.604 | -6.24 | -0.2196 | none |
| KLHL34    | 0.08   | 0.041   | 0.7985 | 0.44377 | 0.604 | -6.24 | 0.77154 | none |
| MYL5      | 0.122  | -0.0099 | 0.7983 | 0.4439  | 0.605 | -6.24 | -0.0684 | none |
| MRPS9     | -0.122 | -0.0357 | -0.798 | 0.44403 | 0.605 | -6.24 | 1.77435 | none |
| OR2T27    | 0.054  | 0.0362  | 0.798  | 0.44404 | 0.605 | -6.24 | 0       | none |
| UBC       | 0.183  | 0.2199  | 0.798  | 0.44407 | 0.605 | -6.24 | -0.07   | none |
| COA7      | 0.118  | 0.1496  | 0.7977 | 0.4442  | 0.605 | -6.24 | -0.3249 | none |
| EFHD2     | -0.077 | -0.0168 | -0.797 | 0.44434 | 0.605 | -6.24 | 0.58182 | none |
| MCEMP1    | -0.066 | -0.0659 | -0.797 | 0.44441 | 0.605 | -6.24 | 0.1193  | none |
| GLRB      | -0.068 | -0.067  | -0.797 | 0.44448 | 0.605 | -6.24 | 0.88257 | none |
| SPPL2A    | -0.119 | -0.1701 | -0.797 | 0.4445  | 0.605 | -6.24 | 1.55117 | none |
| KCNQ1     | 0.088  | 0.0544  | 0.7972 | 0.4445  | 0.605 | -6.24 | -0.8441 | none |
| SLC35F3   | -0.084 | -0.1205 | -0.797 | 0.44454 | 0.605 | -6.24 | 1.41126 | none |
| EXOSC7    | -0.1   | -0.1507 | -0.797 | 0.44454 | 0.605 | -6.24 | 1.37365 | none |
| ATP4A     | -0.079 | -0.0241 | -0.797 | 0.44455 | 0.605 | -6.24 | -0.0531 | none |
| PDE6D     | 0.096  | 0.0409  | 0.7971 | 0.44456 | 0.605 | -6.24 | -0.6741 | none |
| KRTAP1-4  | -0.066 | -0.0659 | -0.797 | 0.44461 | 0.605 | -6.24 | -0.2536 | none |
| VDAC1     | -0.065 | -0.0955 | -0.797 | 0.44462 | 0.605 | -6.24 | 1.48922 | none |
| SFTPA1    | -0.189 | -0.1809 | -0.797 | 0.44463 | 0.605 | -6.24 | 0.84644 | none |
| HCRTR1    | -0.063 | -0.0339 | -0.797 | 0.44479 | 0.605 | -6.24 | 0.18079 | none |
| TDRP      | -0.119 | -0.1075 | -0.796 | 0.44506 | 0.605 | -6.24 | 1.69978 | none |
| IGFBP6    | -0.16  | -0.0628 | -0.796 | 0.44529 | 0.606 | -6.24 | 1.92487 | none |
| NFKBIL1   | 0.23   | 0.1921  | 0.7956 | 0.44539 | 0.606 | -6.24 | 0.33715 | none |
| OR13F1    | -0.066 | -0.0657 | -0.796 | 0.44539 | 0.606 | -6.24 | 0.47965 | none |
| PTS       | -0.137 | -0.2002 | -0.795 | 0.44569 | 0.606 | -6.24 | 0.70802 | none |
| SLC7A4    | -0.055 | -0.0467 | -0.795 | 0.4458  | 0.606 | -6.24 | -0.5825 | none |
| TIMM8B    | -0.127 | -0.1477 | -0.795 | 0.44587 | 0.606 | -6.24 | -0.0363 | none |
| PLET1     | 0.055  | 0.0353  | 0.7947 | 0.44588 | 0.606 | -6.24 | 0       | none |
| MED14     | 0.211  | 0.2972  | 0.7946 | 0.44594 | 0.606 | -6.24 | -0.1502 | none |
| DDX41     | 0.167  | 0.2461  | 0.7946 | 0.44595 | 0.606 | -6.24 | 0.38735 | none |
| OR10G7    | 0.067  | 0.067   | 0.7945 | 0.44597 | 0.606 | -6.24 | 1.01178 | none |
| CCDC91    | 0.179  | 0.23    | 0.7945 | 0.44601 | 0.606 | -6.24 | -0.4673 | none |
| EPB41L3   | -0.148 | -0.1176 | -0.794 | 0.44602 | 0.606 | -6.24 | -0.3824 | none |
| SLC22A7   | 0.066  | 0.0782  | 0.7943 | 0.4461  | 0.606 | -6.24 | 1.68334 | none |
| PTGER1    | -0.058 | -0.0497 | -0.794 | 0.44613 | 0.606 | -6.24 | 0.2674  | none |

|          |        |         |        |         |       |       |         |      |
|----------|--------|---------|--------|---------|-------|-------|---------|------|
| LRRC71   | 0.065  | 0.0662  | 0.7942 | 0.44614 | 0.606 | -6.24 | 0.55263 | none |
| M1AP     | 0.097  | 0.0051  | 0.7942 | 0.44617 | 0.606 | -6.24 | -0.4912 | none |
| RECQL    | 0.136  | 0.1511  | 0.794  | 0.44625 | 0.606 | -6.24 | 0.80958 | none |
| LYZL4    | -0.065 | -0.0654 | -0.794 | 0.44626 | 0.606 | -6.24 | -0.2672 | none |
| ZNF597   | 0.064  | 0.0436  | 0.794  | 0.44627 | 0.606 | -6.24 | -0.5664 | none |
| ELAVL3   | -0.075 | -0.0379 | -0.794 | 0.44639 | 0.606 | -6.24 | -0.3877 | none |
| OR6P1    | 0.067  | 0.0669  | 0.7937 | 0.44646 | 0.606 | -6.24 | 1.44028 | none |
| MCTP2    | -0.127 | -0.1237 | -0.793 | 0.44656 | 0.606 | -6.24 | 0.01867 | none |
| KCNE5    | 0.054  | 0.0726  | 0.7929 | 0.44687 | 0.607 | -6.24 | 0.20361 | none |
| GRIA3    | -0.061 | -0.0344 | -0.793 | 0.44689 | 0.607 | -6.24 | 1.31688 | none |
| NBPF26   | -0.163 | 0.0301  | -0.792 | 0.44712 | 0.607 | -6.24 | 0.93903 | none |
| PLPPR5   | 0.078  | 0.0783  | 0.7923 | 0.44719 | 0.607 | -6.24 | 1.24893 | none |
| SARM1    | 0.113  | 0.1652  | 0.7922 | 0.44729 | 0.607 | -6.24 | 0.90502 | none |
| DEPDC1B  | 0.092  | 0.0306  | 0.792  | 0.44738 | 0.607 | -6.24 | 0.25499 | none |
| GRIN2B   | -0.174 | -0.0399 | -0.792 | 0.44755 | 0.607 | -6.24 | 1.5264  | none |
| EFCAB14  | 0.148  | 0.2221  | 0.7916 | 0.44759 | 0.607 | -6.24 | 0.58589 | none |
| C4ORF51  | 0.166  | 0.1671  | 0.7914 | 0.44769 | 0.607 | -6.24 | 1.06812 | none |
| REC8     | 0.08   | 0.0728  | 0.7914 | 0.44773 | 0.607 | -6.25 | -0.4077 | none |
| NDUFA2   | -0.133 | -0.1869 | -0.791 | 0.44793 | 0.608 | -6.25 | 1.36181 | none |
| MLC1     | -0.109 | -0.068  | -0.791 | 0.44805 | 0.608 | -6.25 | 0.57463 | none |
| YBX2     | 0.066  | 0.0801  | 0.7906 | 0.44816 | 0.608 | -6.25 | 0.91664 | none |
| KLHL13   | 0.078  | 0.0845  | 0.7902 | 0.44838 | 0.608 | -6.25 | 1.1652  | none |
| NCAN     | 0.074  | 0.0779  | 0.7902 | 0.44841 | 0.608 | -6.25 | 1       | none |
| MPP6     | 0.148  | 0.1821  | 0.7901 | 0.44843 | 0.608 | -6.25 | 1.10494 | none |
| CCDC169  | 0.086  | 0.1113  | 0.79   | 0.44851 | 0.608 | -6.25 | -0.2181 | none |
| RNLS     | 0.197  | 0.1136  | 0.7898 | 0.44863 | 0.608 | -6.25 | -0.001  | none |
| RASAL1   | -0.095 | -0.0468 | -0.79  | 0.44864 | 0.608 | -6.25 | 1.63283 | none |
| ZNF479   | 0.056  | 0.0557  | 0.7897 | 0.44868 | 0.608 | -6.25 | 0.98551 | none |
| EXOSC5   | -0.085 | -0.0858 | -0.789 | 0.44888 | 0.608 | -6.25 | 0.86873 | none |
| RIMBP3   | -0.066 | -0.0342 | -0.789 | 0.44889 | 0.608 | -6.25 | 1.00751 | none |
| HSPA5    | 0.103  | 0.1717  | 0.7893 | 0.44891 | 0.608 | -6.25 | 0.54534 | none |
| SAPCD1   | -0.105 | -0.1027 | -0.789 | 0.44898 | 0.608 | -6.25 | 0.57659 | none |
| PGA5     | -0.065 | -0.0647 | -0.789 | 0.44901 | 0.608 | -6.25 | 0.21041 | none |
| SERPINB1 | 0.053  | 0.0531  | 0.7891 | 0.44902 | 0.608 | -6.25 | -0.5163 | none |
| SARAF    | -0.122 | -0.2167 | -0.789 | 0.44906 | 0.608 | -6.25 | 0.928   | none |
| PDLIM1   | 0.098  | 0.1064  | 0.7888 | 0.44917 | 0.608 | -6.25 | -0.1172 | none |
| EIF2B1   | 0.068  | 0.0652  | 0.7888 | 0.44917 | 0.608 | -6.25 | 0.06499 | none |
| POTEE    | -0.069 | -0.0406 | -0.789 | 0.44933 | 0.609 | -6.25 | 1.85224 | none |
| MGAM     | 0.08   | 0.0803  | 0.7884 | 0.44936 | 0.609 | -6.25 | -0.6101 | none |
| RDH11    | 0.107  | 0.1212  | 0.7884 | 0.44938 | 0.609 | -6.25 | 0.65031 | none |

|          |        |         |        |         |       |       |         |      |
|----------|--------|---------|--------|---------|-------|-------|---------|------|
| CELF2    | 0.11   | 0.116   | 0.7879 | 0.44965 | 0.609 | -6.25 | 0.65486 | none |
| PIGP     | -0.135 | -0.2214 | -0.788 | 0.44976 | 0.609 | -6.25 | 0.87041 | none |
| PTPRN    | -0.138 | -0.0627 | -0.788 | 0.44983 | 0.609 | -6.25 | 0.91296 | none |
| MRPL44   | 0.07   | -0.0527 | 0.7874 | 0.44993 | 0.609 | -6.25 | 0.52355 | none |
| SIGLEC9  | 0.094  | 0.0835  | 0.7873 | 0.44998 | 0.609 | -6.25 | 1.11401 | none |
| PDP1     | 0.187  | 0.1507  | 0.7873 | 0.45    | 0.609 | -6.25 | 0.05142 | none |
| ARAP2    | 0.2    | 0.2132  | 0.7872 | 0.45003 | 0.609 | -6.25 | 0.16708 | none |
| DKK1     | 0.085  | 0.0905  | 0.7872 | 0.45004 | 0.609 | -6.25 | 1.1712  | none |
| CAMK2N1  | 0.087  | 0.0752  | 0.787  | 0.45016 | 0.609 | -6.25 | 0.71638 | none |
| MICAL1   | 0.186  | 0.285   | 0.7868 | 0.45026 | 0.609 | -6.25 | 0.6877  | none |
| REXO2    | 0.068  | 0.0286  | 0.7862 | 0.45062 | 0.61  | -6.25 | 1.43489 | none |
| CNGA4    | 0.054  | 0.0556  | 0.786  | 0.4507  | 0.61  | -6.25 | -0.7226 | none |
| PRAMEF19 | 0.068  | 0.0683  | 0.7858 | 0.45083 | 0.61  | -6.25 | 1.29653 | none |
| GUCA1C   | -0.086 | -0.0856 | -0.786 | 0.45085 | 0.61  | -6.25 | -0.0019 | none |
| TAPBPL   | -0.069 | -0.0285 | -0.786 | 0.45092 | 0.61  | -6.25 | 0.60941 | none |
| CDK16    | 0.154  | 0.3059  | 0.7855 | 0.45102 | 0.61  | -6.25 | 0.95208 | none |
| GTF3A    | -0.067 | -0.0517 | -0.785 | 0.45109 | 0.61  | -6.25 | 1.60759 | none |
| MEP1A    | -0.052 | -0.0293 | -0.785 | 0.45112 | 0.61  | -6.25 | 0       | none |
| NAT2     | -0.064 | -0.0641 | -0.785 | 0.45137 | 0.61  | -6.25 | 1.9054  | none |
| HTR1E    | -0.052 | -0.0519 | -0.785 | 0.45148 | 0.61  | -6.25 | 0       | none |
| SMIM12   | -0.114 | -0.1749 | -0.784 | 0.45157 | 0.611 | -6.25 | 0.71855 | none |
| RBAK-RBA | 0.077  | 0.0376  | 0.7842 | 0.45173 | 0.611 | -6.25 | 0.67452 | none |
| EAF2     | 0.109  | 0.0161  | 0.7842 | 0.45173 | 0.611 | -6.25 | -0.7194 | none |
| HHAT     | -0.065 | -0.0428 | -0.784 | 0.45179 | 0.611 | -6.25 | 1.36904 | none |
| ORAI1    | 0.118  | 0.0438  | 0.784  | 0.45184 | 0.611 | -6.25 | -0.0863 | none |
| CCDC42   | 0.076  | 0.0414  | 0.7839 | 0.45191 | 0.611 | -6.25 | 1.03004 | none |
| QRFP     | 0.054  | 0.0673  | 0.7839 | 0.45191 | 0.611 | -6.25 | -0.9455 | none |
| ATG4D    | 0.14   | 0.1341  | 0.7837 | 0.452   | 0.611 | -6.25 | -0.9201 | none |
| PTPRR    | 0.061  | 0.0634  | 0.7837 | 0.45203 | 0.611 | -6.25 | 0.31829 | none |
| TH       | -0.103 | -0.0645 | -0.783 | 0.45216 | 0.611 | -6.25 | 1.78675 | none |
| CCDC92   | 0.242  | 0.2511  | 0.7834 | 0.45216 | 0.611 | -6.25 | 0.17146 | none |
| HES7     | -0.061 | -0.0768 | -0.783 | 0.45221 | 0.611 | -6.25 | 1.6718  | none |
| VIPAS39  | 0.062  | 0.059   | 0.7833 | 0.45222 | 0.611 | -6.25 | -0.6255 | none |
| HIST1H1A | -0.13  | -0.1618 | -0.783 | 0.45223 | 0.611 | -6.25 | 0.51258 | none |
| RMDN3    | -0.063 | 0.0184  | -0.783 | 0.45231 | 0.611 | -6.25 | 1.3124  | none |
| AIMP1    | -0.113 | -0.1328 | -0.783 | 0.4524  | 0.611 | -6.25 | 1.20453 | none |
| SULT1A2  | 0.074  | 0.0887  | 0.783  | 0.45243 | 0.611 | -6.25 | -0.9603 | none |
| ZNF497   | 0.077  | 0.0396  | 0.7829 | 0.45246 | 0.611 | -6.25 | -0.7128 | none |
| KRT222   | -0.063 | -0.0305 | -0.783 | 0.45259 | 0.611 | -6.25 | 1.00369 | none |
| TRAF3IP3 | 0.149  | 0.1845  | 0.7826 | 0.45265 | 0.611 | -6.25 | -0.1942 | none |

|          |        |         |        |         |       |       |         |      |
|----------|--------|---------|--------|---------|-------|-------|---------|------|
| GABRB3   | 0.177  | 0.0543  | 0.7825 | 0.45266 | 0.611 | -6.25 | -0.8358 | none |
| BRD2     | 0.188  | 0.3635  | 0.7819 | 0.453   | 0.611 | -6.25 | 0.06534 | none |
| HCCS     | -0.106 | -0.1333 | -0.782 | 0.45305 | 0.611 | -6.25 | 1.69139 | none |
| SLC6A17  | -0.079 | -0.061  | -0.782 | 0.45321 | 0.612 | -6.25 | 1.24072 | none |
| C20ORF19 | 0.1    | 0.1302  | 0.7814 | 0.45332 | 0.612 | -6.25 | -0.0231 | none |
| EGFR     | -0.076 | -0.0704 | -0.781 | 0.4534  | 0.612 | -6.25 | 1.25002 | none |
| PACS2    | 0.147  | 0.2217  | 0.7811 | 0.45349 | 0.612 | -6.25 | -0.0837 | none |
| GPR87    | -0.097 | -0.1122 | -0.781 | 0.45352 | 0.612 | -6.25 | 1.1952  | none |
| BRPF1    | 0.224  | 0.3603  | 0.7807 | 0.45371 | 0.612 | -6.25 | -0.2553 | none |
| C5ORF52  | 0.088  | 0.1017  | 0.7804 | 0.45387 | 0.612 | -6.25 | -0.0304 | none |
| BEND6    | 0.056  | 0.0543  | 0.7804 | 0.45388 | 0.612 | -6.25 | -0.8686 | none |
| ASB5     | -0.063 | -0.0634 | -0.78  | 0.45398 | 0.612 | -6.25 | 1.96868 | none |
| CSRP1    | -0.08  | -0.0668 | -0.78  | 0.45412 | 0.612 | -6.25 | 1.56543 | none |
| C17ORF10 | 0.064  | 0.0566  | 0.7799 | 0.45417 | 0.612 | -6.25 | 1.5569  | none |
| BRPF3    | 0.169  | 0.2478  | 0.7798 | 0.45419 | 0.612 | -6.25 | -0.452  | none |
| CCDC140  | 0.065  | 0.0648  | 0.7798 | 0.45419 | 0.612 | -6.25 | -0.9329 | none |
| ZSCAN26  | 0.177  | 0.193   | 0.7798 | 0.45421 | 0.612 | -6.25 | 0.25366 | none |
| TLX3     | -0.061 | -0.0517 | -0.779 | 0.45458 | 0.613 | -6.25 | 0.52268 | none |
| KLHL28   | 0.117  | 0.0291  | 0.779  | 0.45464 | 0.613 | -6.25 | 0.61147 | none |
| OR52B2   | 0.062  | 0.0721  | 0.7789 | 0.45471 | 0.613 | -6.25 | 0.86922 | none |
| USPL1    | 0.143  | 0.1774  | 0.7787 | 0.45482 | 0.613 | -6.26 | 0.39802 | none |
| RNF5     | -0.126 | -0.2026 | -0.779 | 0.45484 | 0.613 | -6.26 | 0.98498 | none |
| CXCR6    | -0.099 | -0.1579 | -0.778 | 0.45498 | 0.613 | -6.26 | 1.08963 | none |
| CDH9     | 0.121  | 0.1255  | 0.7783 | 0.45502 | 0.613 | -6.26 | 0.97741 | none |
| NOVA1    | -0.069 | -0.0603 | -0.778 | 0.45504 | 0.613 | -6.26 | 0.82445 | none |
| CASKIN2  | -0.164 | -0.1036 | -0.778 | 0.45506 | 0.613 | -6.26 | 1.41356 | none |
| KLHL32   | -0.069 | -0.0457 | -0.778 | 0.45517 | 0.613 | -6.26 | 1.80086 | none |
| DEFB108B | 0.065  | 0.0645  | 0.7779 | 0.45525 | 0.613 | -6.26 | 1.19688 | none |
| ABCA10   | -0.118 | -0.0711 | -0.778 | 0.45528 | 0.613 | -6.26 | 1.29987 | none |
| DOK2     | -0.084 | -0.0514 | -0.778 | 0.45532 | 0.613 | -6.26 | 0.60787 | none |
| ZSWIM3   | -0.101 | -0.1085 | -0.778 | 0.45533 | 0.613 | -6.26 | 0.55491 | none |
| MATN1    | 0.116  | 0.0841  | 0.7777 | 0.45537 | 0.613 | -6.26 | -0.1621 | none |
| CACUL1   | 0.107  | 0.1434  | 0.7775 | 0.45549 | 0.613 | -6.26 | -0.5758 | none |
| HES4     | -0.06  | -0.0802 | -0.777 | 0.45558 | 0.613 | -6.26 | 0.79957 | none |
| HAT1     | 0.075  | 0.001   | 0.7773 | 0.45562 | 0.613 | -6.26 | -0.0713 | none |
| GRIN2A   | -0.095 | -0.0934 | -0.777 | 0.45566 | 0.613 | -6.26 | -0.234  | none |
| AC213203 | -0.209 | -0.2095 | -0.777 | 0.45569 | 0.613 | -6.26 | 1.08356 | none |
| GRHPR    | 0.113  | 0.0688  | 0.7771 | 0.45569 | 0.613 | -6.26 | -0.2606 | none |
| H2AFV    | -0.075 | -0.112  | -0.777 | 0.45578 | 0.613 | -6.26 | 0.22152 | none |
| DNLZ     | -0.109 | -0.1037 | -0.777 | 0.45583 | 0.613 | -6.26 | 0.54465 | none |

|                      |        |         |        |         |       |       |         |      |
|----------------------|--------|---------|--------|---------|-------|-------|---------|------|
| PLXNA2               | 0.062  | 0.0825  | 0.7766 | 0.456   | 0.614 | -6.26 | -0.4259 | none |
| CADM3                | -0.062 | -0.0563 | -0.777 | 0.45601 | 0.614 | -6.26 | 1.45123 | none |
| SYNGR1               | 0.094  | 0.082   | 0.776  | 0.45631 | 0.614 | -6.26 | -0.1039 | none |
| GCNT7                | -0.13  | -0.0896 | -0.776 | 0.4564  | 0.614 | -6.26 | 1.33487 | none |
| CLDN14               | 0.066  | 0.0638  | 0.7758 | 0.45643 | 0.614 | -6.26 | 0.62521 | none |
| UTRN                 | 0.158  | 0.2565  | 0.7756 | 0.45655 | 0.614 | -6.26 | -0.3069 | none |
| FABP7                | 0.05   | 0.0213  | 0.7754 | 0.45667 | 0.614 | -6.26 | 0.11438 | none |
| NDUFB10              | -0.101 | -0.1045 | -0.775 | 0.45681 | 0.614 | -6.26 | 1.12511 | none |
| RNASE8               | 0.064  | 0.0641  | 0.7751 | 0.45684 | 0.614 | -6.26 | 0.1843  | none |
| TTF2                 | 0.241  | 0.3762  | 0.7751 | 0.45685 | 0.614 | -6.26 | 0.2071  | none |
| ANTXRL               | 0.297  | 0.1566  | 0.7751 | 0.45685 | 0.614 | -6.26 | 0.33061 | none |
| DPH2                 | 0.077  | 0.0662  | 0.7747 | 0.4571  | 0.614 | -6.26 | 0.61697 | none |
| C16ORF46             | 0.076  | 0.0763  | 0.7745 | 0.45717 | 0.615 | -6.26 | 1.15822 | none |
| CLECL1               | -0.176 | -0.1744 | -0.774 | 0.45722 | 0.615 | -6.26 | 1.21298 | none |
| NPR3                 | -0.06  | -0.0118 | -0.774 | 0.45726 | 0.615 | -6.26 | 1.26874 | none |
| SERPINC1             | 0.058  | 0.0676  | 0.7742 | 0.45733 | 0.615 | -6.26 | 1.35416 | none |
| DPPA5                | -0.063 | -0.0626 | -0.774 | 0.45736 | 0.615 | -6.26 | 1.9054  | none |
| VPS52                | 0.212  | 0.1119  | 0.7741 | 0.4574  | 0.615 | -6.26 | 0.54487 | none |
| HRH2                 | 0.131  | 0.2341  | 0.7739 | 0.45752 | 0.615 | -6.26 | 0.62772 | none |
| NT5C1B               | 0.123  | 0.1508  | 0.7739 | 0.45753 | 0.615 | -6.26 | 0.27373 | none |
| PRAMEF2 <sup>5</sup> | 0.053  | 0.0359  | 0.7738 | 0.45757 | 0.615 | -6.26 | 0       | none |
| PIGZ                 | -0.06  | -0.0326 | -0.774 | 0.45758 | 0.615 | -6.26 | 0.85343 | none |
| FBXL15               | 0.117  | 0.0802  | 0.7737 | 0.45764 | 0.615 | -6.26 | 0.58292 | none |
| MYO16                | -0.067 | -0.0834 | -0.774 | 0.45769 | 0.615 | -6.26 | 1.09756 | none |
| DNPEP                | 0.107  | 0.0715  | 0.7735 | 0.45774 | 0.615 | -6.26 | -0.564  | none |
| OTX2                 | 0.061  | 0.0672  | 0.7735 | 0.45774 | 0.615 | -6.26 | 0.91633 | none |
| RIC3                 | 0.226  | 0.1902  | 0.7735 | 0.45775 | 0.615 | -6.26 | 1.07586 | none |
| MDFI                 | 0.071  | 0.0939  | 0.7725 | 0.45831 | 0.615 | -6.26 | 1.3695  | none |
| LACRT                | 0.064  | 0.0637  | 0.7723 | 0.4584  | 0.615 | -6.26 | 1.19688 | none |
| RPF2                 | 0.095  | 0.0603  | 0.7723 | 0.4584  | 0.615 | -6.26 | -0.137  | none |
| MEGF10               | -0.086 | -0.0867 | -0.772 | 0.45872 | 0.616 | -6.26 | 0.63464 | none |
| GNL2                 | 0.233  | 0.3422  | 0.7715 | 0.45887 | 0.616 | -6.26 | 0.31328 | none |
| DTX3                 | 0.158  | 0.1719  | 0.7715 | 0.45888 | 0.616 | -6.26 | 0.2242  | none |
| ARHGAP4 <sup>4</sup> | 0.083  | 0.0324  | 0.7711 | 0.4591  | 0.616 | -6.26 | -0.8042 | none |
| BMP7                 | 0.127  | 0.1774  | 0.7708 | 0.45929 | 0.616 | -6.26 | 0.58749 | none |
| TP53INP2             | 0.081  | 0.1197  | 0.7704 | 0.45949 | 0.617 | -6.26 | 0.14209 | none |
| SERPINB4             | 0.063  | 0.0634  | 0.7704 | 0.45952 | 0.617 | -6.26 | 0.36521 | none |
| HIST1H1E             | -0.151 | 0.0209  | -0.77  | 0.45956 | 0.617 | -6.26 | 2.0461  | none |
| HIST1H2BI            | 0.148  | 0.0337  | 0.7702 | 0.45961 | 0.617 | -6.26 | -0.5664 | none |
| SPTBN5               | 0.054  | 0.054   | 0.7699 | 0.4598  | 0.617 | -6.26 | -0.0482 | none |

|          |        |         |        |         |       |       |         |            |
|----------|--------|---------|--------|---------|-------|-------|---------|------------|
| VOPP1    | 0.088  | 0.0237  | 0.7696 | 0.45994 | 0.617 | -6.26 | 1.13094 | none       |
| ONECUT1  | -0.068 | -0.0593 | -0.77  | 0.46    | 0.617 | -6.26 | -0.1836 | none       |
| PTPRQ    | 0.066  | 0.0669  | 0.7695 | 0.46    | 0.617 | -6.26 | -0.2605 | none       |
| C1ORF74  | -0.073 | -0.0766 | -0.769 | 0.46016 | 0.617 | -6.26 | 1.18791 | none       |
| GPR19    | -0.122 | -0.1928 | -0.769 | 0.46024 | 0.617 | -6.26 | 1.03158 | none       |
| RBM22    | 0.075  | 0.065   | 0.7688 | 0.4604  | 0.617 | -6.26 | 0.70639 | none       |
| PAX4     | 0.073  | 0.091   | 0.7685 | 0.46056 | 0.617 | -6.26 | 0.08219 | none       |
| PCDHA13  | -0.054 | -0.0391 | -0.768 | 0.46067 | 0.618 | -6.26 | 0       | none       |
| THAP8    | -0.182 | -0.1376 | -0.768 | 0.46074 | 0.618 | -6.26 | 0.06673 | none       |
| FIS1     | -0.136 | -0.1871 | -0.768 | 0.46078 | 0.618 | -6.26 | 1.06212 | none       |
| EIF4EBP1 | -0.09  | -0.0395 | -0.768 | 0.46102 | 0.618 | -6.26 | 0.32532 | none       |
| PLA2G2F  | 0.054  | 0.0498  | 0.7677 | 0.46104 | 0.618 | -6.26 | 0       | none       |
| CTAGE4   | -0.054 | -0.0667 | -0.767 | 0.46122 | 0.618 | -6.26 | 1.16849 | none       |
| FXYD2    | 0.274  | 0.1531  | 0.767  | 0.4614  | 0.618 | -6.26 | -0.3674 | none       |
| H2AFJ    | -0.112 | -0.1723 | -0.767 | 0.46158 | 0.618 | -6.26 | 0.4989  | none       |
| HACL1    | -0.077 | -0.1332 | -0.767 | 0.46171 | 0.619 | -6.26 | 0.83652 | none       |
| GJD3     | -0.058 | -0.0635 | -0.766 | 0.46173 | 0.619 | -6.26 | 1.50067 | none       |
| STAT1    | 0.112  | 0.1351  | 0.7664 | 0.46178 | 0.619 | -6.26 | 0.33524 | none       |
| SLC27A3  | 0.129  | 0.181   | 0.7661 | 0.46196 | 0.619 | -6.27 | 0.01677 | none       |
| PSMB10   | -0.123 | -0.1568 | -0.766 | 0.46202 | 0.619 | -6.27 | 1.46803 | none       |
| ENDOU    | -0.108 | -0.074  | -0.765 | 0.46232 | 0.619 | -6.27 | 1.12799 | none       |
| SFTA3    | -0.091 | -0.0591 | -0.765 | 0.46232 | 0.619 | -6.27 | 0.67467 | none       |
| BAIAP2L2 | -0.058 | -0.0441 | -0.765 | 0.46235 | 0.619 | -6.27 | 1.61804 | none       |
| LIME1    | -0.119 | -0.2753 | -0.765 | 0.46246 | 0.619 | -6.27 | 0.32842 | none       |
| COTL1    | -0.114 | -0.1393 | -0.765 | 0.46247 | 0.619 | -6.27 | 0.24338 | none       |
| PCYOX1L  | 0.093  | 0.0889  | 0.7651 | 0.46251 | 0.619 | -6.27 | 0.95635 | none       |
| ARHGAP19 | -0.167 | -0.0507 | -0.765 | 0.46254 | 0.619 | -6.27 | 1.27732 | none       |
| SLC4A2   | -0.097 | -0.0456 | -0.765 | 0.46276 | 0.619 | -6.27 | 1.02244 | none       |
| FBXO17   | 0.067  | 0.0394  | 0.7645 | 0.46282 | 0.619 | -6.27 | -0.4265 | none       |
| LRP12    | 0.099  | 0.1206  | 0.7645 | 0.46285 | 0.619 | -6.27 | 0.21218 | none       |
| B9D2     | 0.17   | 0.0864  | 0.7645 | 0.46287 | 0.619 | -6.27 | -0.6012 | none       |
| TMEM187  | 0.156  | 0.0625  | 0.7644 | 0.46288 | 0.619 | -6.27 | -0.1663 | none       |
| GALE     | 0.065  | 0.0358  | 0.7642 | 0.46301 | 0.619 | -6.27 | 0.5802  | none       |
| NOL4     | 0.063  | 0.0626  | 0.7641 | 0.46305 | 0.619 | -6.27 | -0.6951 | none       |
| CEACAM3  | 0.085  | 0.1002  | 0.7638 | 0.46326 | 0.62  | -6.27 | -0.6509 | none       |
| PMF1-BGL | -0.124 | -0.1779 | -0.764 | 0.46329 | 0.62  | -6.27 | 0.36722 | none       |
| LDHD     | 0.114  | 0.0848  | 0.7635 | 0.46342 | 0.62  | -6.27 | -0.3273 | none       |
| CSH2     | 0.064  | 0.0632  | 0.7634 | 0.46345 | 0.62  | -6.27 | 0.92852 | none       |
| TTC34    | 0.049  | 0.0281  | 0.7627 | 0.46385 | 0.62  | -6.27 | 0       | none       |
| C6ORF120 | -0.067 | -0.0508 | -0.763 | 0.46395 | 0.62  | -6.27 | 2.15265 | AA-related |

|           |        |         |        |         |       |       |         |      |
|-----------|--------|---------|--------|---------|-------|-------|---------|------|
| SV2B      | 0.091  | 0.0352  | 0.7624 | 0.46402 | 0.62  | -6.27 | -0.799  | none |
| GPR55     | 0.142  | 0.0851  | 0.7621 | 0.4642  | 0.621 | -6.27 | 0.38007 | none |
| SDHAF2    | 0.114  | 0.0395  | 0.7616 | 0.46451 | 0.621 | -6.27 | 0.11805 | none |
| SYNGR2    | -0.125 | -0.1514 | -0.761 | 0.46461 | 0.621 | -6.27 | 0.62172 | none |
| SAMD1     | 0.091  | 0.1603  | 0.761  | 0.46483 | 0.621 | -6.27 | 0.94222 | none |
| SEMA6D    | 0.053  | 0.0521  | 0.7609 | 0.4649  | 0.621 | -6.27 | -0.4481 | none |
| HIST1H2BJ | 0.142  | 0.077   | 0.7609 | 0.46491 | 0.621 | -6.27 | 0.22092 | none |
| COMMD5    | -0.1   | -0.0647 | -0.76  | 0.46516 | 0.622 | -6.27 | 1.28255 | none |
| KRTCAP3   | -0.098 | 0.0328  | -0.76  | 0.46518 | 0.622 | -6.27 | 1.44919 | none |
| EDDM3A    | 0.062  | 0.062   | 0.7604 | 0.46519 | 0.622 | -6.27 | 1.19688 | none |
| MAD2L2    | -0.075 | -0.0733 | -0.76  | 0.46543 | 0.622 | -6.27 | 0.95532 | none |
| AASDH     | -0.151 | -0.1336 | -0.76  | 0.46546 | 0.622 | -6.27 | 1.28499 | none |
| ELL3      | 0.109  | 0.0517  | 0.7593 | 0.4658  | 0.622 | -6.27 | -0.9494 | none |
| PARD3     | 0.112  | 0.1461  | 0.7592 | 0.46589 | 0.622 | -6.27 | -0.2576 | none |
| MFSD6L    | -0.048 | -0.0277 | -0.759 | 0.46592 | 0.622 | -6.27 | 1.30958 | none |
| CA4       | -0.057 | -0.0087 | -0.759 | 0.46592 | 0.622 | -6.27 | 2.09051 | none |
| NCS1      | -0.064 | -0.0323 | -0.759 | 0.46601 | 0.622 | -6.27 | 0.1194  | none |
| DLX5      | 0.051  | 0.0509  | 0.7588 | 0.46609 | 0.622 | -6.27 | 0       | none |
| OR4M2     | -0.074 | -0.0312 | -0.758 | 0.46635 | 0.623 | -6.27 | 1.48825 | none |
| PLEK      | 0.132  | 0.0745  | 0.7582 | 0.46645 | 0.623 | -6.27 | -0.681  | none |
| SPARC     | 0.096  | 0.0645  | 0.758  | 0.46653 | 0.623 | -6.27 | 1.42914 | none |
| EBLN2     | 0.078  | 0.0533  | 0.7577 | 0.46675 | 0.623 | -6.27 | 0.56527 | none |
| SH3GL2    | -0.052 | -0.0419 | -0.757 | 0.46688 | 0.623 | -6.27 | 1.12675 | none |
| ZNF878    | -0.062 | -0.0053 | -0.757 | 0.46694 | 0.623 | -6.27 | 0.84291 | none |
| UTP3      | 0.155  | 0.2538  | 0.7573 | 0.46694 | 0.623 | -6.27 | 0.01549 | none |
| CEL       | 0.057  | 0.0651  | 0.7573 | 0.46695 | 0.623 | -6.27 | -0.5147 | none |
| ABHD12    | 0.119  | 0.1138  | 0.7572 | 0.467   | 0.623 | -6.27 | -0.2367 | none |
| GEMIN8    | -0.058 | -0.0619 | -0.757 | 0.46701 | 0.623 | -6.27 | 0.78034 | none |
| PPIG      | 0.198  | 0.3056  | 0.7569 | 0.46717 | 0.623 | -6.27 | 0.36561 | none |
| TGM6      | -0.087 | -0.0967 | -0.756 | 0.46748 | 0.624 | -6.27 | 1.34552 | none |
| TMEM72    | 0.066  | 0.0862  | 0.7561 | 0.46763 | 0.624 | -6.27 | 1.40251 | none |
| TMEM126   | -0.093 | -0.1345 | -0.756 | 0.4677  | 0.624 | -6.27 | 0.37966 | none |
| SYT7      | -0.081 | -0.042  | -0.756 | 0.46774 | 0.624 | -6.27 | -0.0546 | none |
| BICC1     | -0.066 | -0.0687 | -0.756 | 0.46781 | 0.624 | -6.27 | 1.81406 | none |
| MGMT      | -0.101 | -0.0941 | -0.756 | 0.46785 | 0.624 | -6.27 | 1.6285  | none |
| OR4C13    | -0.06  | -0.06   | -0.755 | 0.46831 | 0.624 | -6.27 | -0.2807 | none |
| DOCK10    | 0.224  | 0.3265  | 0.7549 | 0.46833 | 0.624 | -6.27 | -0.3037 | none |
| MEDAG     | -0.078 | -0.0779 | -0.755 | 0.46837 | 0.624 | -6.27 | 1.94317 | none |
| PTPRA     | 0.196  | 0.2714  | 0.7546 | 0.46852 | 0.625 | -6.27 | 0.39051 | none |
| OR4D11    | 0.061  | 0.0612  | 0.7545 | 0.46857 | 0.625 | -6.27 | 0.84279 | none |



|          |        |         |        |         |       |       |         |      |
|----------|--------|---------|--------|---------|-------|-------|---------|------|
| FSCN2    | 0.065  | 0.0797  | 0.7543 | 0.46866 | 0.625 | -6.27 | 0.37922 | none |
| NAT14    | 0.175  | 0.1411  | 0.7543 | 0.46869 | 0.625 | -6.27 | 0.37437 | none |
| HSPB3    | -0.06  | -0.0599 | -0.754 | 0.4687  | 0.625 | -6.27 | 1.9054  | none |
| DNAJC4   | 0.102  | 0.0648  | 0.7542 | 0.46872 | 0.625 | -6.27 | 0.56901 | none |
| ITPRIP   | 0.13   | 0.2157  | 0.7541 | 0.46876 | 0.625 | -6.27 | 0.6142  | none |
| TMSB15A  | -0.112 | -0.1114 | -0.754 | 0.46882 | 0.625 | -6.27 | 0.23288 | none |
| TPSAB1   | -0.069 | -0.0321 | -0.754 | 0.46884 | 0.625 | -6.27 | 1.12912 | none |
| PSMG3    | -0.113 | -0.1241 | -0.754 | 0.469   | 0.625 | -6.27 | -0.3287 | none |
| FAM222A  | -0.084 | -0.0307 | -0.753 | 0.46919 | 0.625 | -6.27 | 0.31072 | none |
| COX8C    | -0.061 | -0.0607 | -0.753 | 0.46925 | 0.625 | -6.27 | 0.5687  | none |
| CORO7-PA | -0.081 | -0.0515 | -0.753 | 0.46933 | 0.625 | -6.28 | 0.58415 | none |
| RTN4     | 0.069  | 0.0452  | 0.7531 | 0.46934 | 0.625 | -6.28 | -0.1379 | none |
| TOX2     | 0.139  | 0.2181  | 0.753  | 0.46943 | 0.625 | -6.28 | 0.036   | none |
| CEBPG    | 0.06   | 0.0809  | 0.753  | 0.46944 | 0.625 | -6.28 | 0.56824 | none |
| TUBA8    | 0.166  | 0.0968  | 0.7529 | 0.46947 | 0.625 | -6.28 | -0.1974 | none |
| CFAP43   | -0.056 | -0.0277 | -0.753 | 0.46947 | 0.625 | -6.28 | -0.3015 | none |
| SLC22A14 | 0.077  | 0.0812  | 0.7529 | 0.4695  | 0.625 | -6.28 | 0.02849 | none |
| MAGEA2   | -0.06  | -0.0597 | -0.753 | 0.46966 | 0.625 | -6.28 | 1.75405 | none |
| OR2M5    | 0.061  | 0.0609  | 0.7525 | 0.46972 | 0.625 | -6.28 | 1.19688 | none |
| PLCH2    | 0.175  | 0.1222  | 0.7524 | 0.46976 | 0.625 | -6.28 | -0.2078 | none |
| SMAD6    | 0.055  | 0.0564  | 0.7517 | 0.47016 | 0.626 | -6.28 | -0.348  | none |
| DYNC2H1  | -0.051 | -0.0262 | -0.752 | 0.47024 | 0.626 | -6.28 | 0.58259 | none |
| CAPN13   | 0.082  | 0.0822  | 0.7509 | 0.47063 | 0.626 | -6.28 | 1.58251 | none |
| TRIM67   | 0.053  | 0.0409  | 0.7508 | 0.47067 | 0.626 | -6.28 | 0.04936 | none |
| ARFRP1   | 0.065  | 0.0748  | 0.7507 | 0.47072 | 0.626 | -6.28 | 0.80529 | none |
| PQLC3    | 0.101  | -0.073  | 0.7504 | 0.47088 | 0.626 | -6.28 | 0.4934  | none |
| EPHB3    | 0.088  | 0.0991  | 0.7504 | 0.4709  | 0.626 | -6.28 | 0.46418 | none |
| ZNF354C  | 0.087  | 0.1368  | 0.7501 | 0.4711  | 0.627 | -6.28 | 0.73509 | none |
| PITRM1   | 0.17   | 0.2455  | 0.7499 | 0.47117 | 0.627 | -6.28 | 0.97518 | none |
| MTSS1L   | -0.188 | -0.1922 | -0.75  | 0.47123 | 0.627 | -6.28 | 1.28226 | none |
| FCN2     | 0.061  | 0.0606  | 0.7498 | 0.47124 | 0.627 | -6.28 | 0.98208 | none |
| CDC37    | 0.145  | 0.2296  | 0.7495 | 0.47143 | 0.627 | -6.28 | 0.17455 | none |
| NAA50    | 0.102  | 0.0783  | 0.7494 | 0.47146 | 0.627 | -6.28 | 0.86787 | none |
| CHIA     | -0.06  | -0.0602 | -0.749 | 0.47164 | 0.627 | -6.28 | 1.98404 | none |
| SLC38A8  | 0.179  | 0.0888  | 0.749  | 0.4717  | 0.627 | -6.28 | -0.2752 | none |
| BANK1    | 0.268  | 0.2068  | 0.749  | 0.47171 | 0.627 | -6.28 | 0.77135 | none |
| C10ORF62 | -0.065 | -0.0498 | -0.749 | 0.47184 | 0.627 | -6.28 | -0.4463 | none |
| KRT17    | 0.123  | 0.0394  | 0.7488 | 0.47185 | 0.627 | -6.28 | 0.08768 | none |
| GNA13    | 0.071  | 0.0246  | 0.7486 | 0.47196 | 0.627 | -6.28 | 0.77123 | none |
| GCSAML   | 0.092  | 0.0933  | 0.7483 | 0.47209 | 0.627 | -6.28 | -0.332  | none |

|          |        |         |        |         |       |       |         |      |
|----------|--------|---------|--------|---------|-------|-------|---------|------|
| TUBA3D   | -0.107 | -0.1044 | -0.748 | 0.47221 | 0.627 | -6.28 | 0.75953 | none |
| TSPY3    | 0.055  | 0.0599  | 0.748  | 0.47227 | 0.627 | -6.28 | 1.13029 | none |
| FBXO39   | -0.076 | -0.0555 | -0.748 | 0.47231 | 0.627 | -6.28 | 1.9354  | none |
| HMGB3    | -0.105 | -0.1346 | -0.748 | 0.47232 | 0.627 | -6.28 | 0.18816 | none |
| RIMBP2   | 0.071  | 0.0837  | 0.7474 | 0.47262 | 0.628 | -6.28 | -0.385  | none |
| SLC4A3   | -0.068 | -0.0425 | -0.747 | 0.47268 | 0.628 | -6.28 | 0.37443 | none |
| DHX32    | 0.105  | 0.1807  | 0.7469 | 0.47293 | 0.628 | -6.28 | 1.23549 | none |
| BTN3A3   | 0.082  | -0.0081 | 0.7466 | 0.47309 | 0.628 | -6.28 | 0.64354 | none |
| NCAPG    | 0.131  | 0.1635  | 0.7466 | 0.47311 | 0.628 | -6.28 | 0.59747 | none |
| PTHLH    | -0.11  | -0.0735 | -0.746 | 0.47322 | 0.628 | -6.28 | 0.6519  | none |
| SLU7     | 0.233  | 0.3531  | 0.7464 | 0.47322 | 0.628 | -6.28 | 0.48322 | none |
| LDLRAD1  | 0.053  | 0.054   | 0.7464 | 0.47322 | 0.628 | -6.28 | -0.0731 | none |
| IGLON5   | 0.052  | 0.0532  | 0.7462 | 0.47332 | 0.628 | -6.28 | -0.5149 | none |
| YPEL3    | -0.115 | -0.1311 | -0.746 | 0.47337 | 0.628 | -6.28 | -0.4618 | none |
| KATNAL2  | 0.16   | 0.1995  | 0.7459 | 0.47351 | 0.628 | -6.28 | 1.15425 | none |
| DDT      | -0.12  | -0.1613 | -0.745 | 0.47383 | 0.629 | -6.28 | 1.46118 | none |
| RASSF7   | -0.076 | -0.0834 | -0.745 | 0.47397 | 0.629 | -6.28 | 2.08997 | none |
| RBM10    | 0.18   | 0.304   | 0.745  | 0.47402 | 0.629 | -6.28 | 0.37807 | none |
| TYMS     | -0.093 | -0.0391 | -0.744 | 0.47446 | 0.629 | -6.28 | 1.59861 | none |
| FERD3L   | 0.06   | 0.0598  | 0.7441 | 0.47454 | 0.63  | -6.28 | 1.19688 | none |
| LSAMP    | -0.157 | -0.1162 | -0.744 | 0.47457 | 0.63  | -6.28 | 0.63393 | none |
| CST1     | 0.065  | 0.0654  | 0.7439 | 0.47466 | 0.63  | -6.28 | -0.0788 | none |
| SLC35A2  | -0.145 | -0.1524 | -0.744 | 0.47468 | 0.63  | -6.28 | 1.2532  | none |
| FKBP2    | -0.069 | -0.0091 | -0.744 | 0.47483 | 0.63  | -6.28 | 0.97608 | none |
| CX3CR1   | -0.073 | -0.0481 | -0.744 | 0.47487 | 0.63  | -6.28 | 0.00898 | none |
| DXO      | -0.214 | -0.1215 | -0.743 | 0.47502 | 0.63  | -6.28 | 0.69809 | none |
| GRASP    | -0.166 | -0.1563 | -0.743 | 0.47503 | 0.63  | -6.28 | 0.06022 | none |
| RAB3GAP2 | 0.167  | 0.2052  | 0.7432 | 0.47508 | 0.63  | -6.28 | 0.21529 | none |
| ABCA12   | 0.07   | 0.0785  | 0.7431 | 0.4751  | 0.63  | -6.28 | 1.19418 | none |
| IL1RAP   | 0.111  | 0.1591  | 0.7431 | 0.47513 | 0.63  | -6.28 | -0.153  | none |
| ACTL7A   | -0.059 | -0.0363 | -0.743 | 0.47527 | 0.63  | -6.28 | 0.04755 | none |
| CLEC4G   | -0.054 | -0.0297 | -0.743 | 0.4753  | 0.63  | -6.28 | 1.04562 | none |
| SSRP1    | 0.161  | 0.2588  | 0.7428 | 0.4753  | 0.63  | -6.28 | 0.36494 | none |
| PLA2G12B | 0.083  | 0.0321  | 0.7426 | 0.47542 | 0.63  | -6.28 | 0.883   | none |
| SOD3     | -0.058 | -0.0584 | -0.743 | 0.47543 | 0.63  | -6.28 | 2.02693 | none |
| FBXO32   | 0.126  | 0.1643  | 0.7425 | 0.47546 | 0.63  | -6.28 | 0.88932 | none |
| DNALI1   | -0.055 | -0.0474 | -0.742 | 0.47557 | 0.63  | -6.28 | 0.41893 | none |
| RAB43    | 0.113  | 0.1099  | 0.7421 | 0.47569 | 0.63  | -6.28 | -0.1867 | none |
| ZBTB48   | 0.16   | 0.1665  | 0.742  | 0.47574 | 0.63  | -6.28 | -0.3758 | none |
| TOP2B    | 0.273  | 0.3763  | 0.7417 | 0.47592 | 0.63  | -6.28 | 0.13894 | none |

|          |        |         |        |         |       |       |         |      |
|----------|--------|---------|--------|---------|-------|-------|---------|------|
| ATG16L1  | 0.084  | 0.1174  | 0.7416 | 0.47601 | 0.63  | -6.28 | 0.79843 | none |
| PPM1H    | 0.053  | 0.0621  | 0.7415 | 0.47606 | 0.63  | -6.28 | 0.09451 | none |
| DTWD1    | 0.088  | 0.0552  | 0.7411 | 0.47629 | 0.631 | -6.28 | 0.637   | none |
| VEGFC    | 0.055  | 0.0583  | 0.741  | 0.47635 | 0.631 | -6.28 | 1.453   | none |
| TCEA2    | -0.077 | -0.0244 | -0.741 | 0.47635 | 0.631 | -6.28 | 0.49628 | none |
| RNPEPL1  | 0.131  | 0.1516  | 0.7405 | 0.47665 | 0.631 | -6.28 | 0.34465 | none |
| IL11RA   | 0.12   | 0.1295  | 0.7404 | 0.47666 | 0.631 | -6.28 | 0.00851 | none |
| CXCR4    | -0.099 | -0.2083 | -0.74  | 0.47679 | 0.631 | -6.28 | 1.20528 | none |
| TRAF7    | -0.072 | 0.0073  | -0.74  | 0.47697 | 0.631 | -6.29 | 0.72025 | none |
| STX6     | 0.106  | 0.1862  | 0.7396 | 0.47714 | 0.631 | -6.29 | 0.26267 | none |
| NOP16    | -0.079 | -0.0834 | -0.739 | 0.47732 | 0.632 | -6.29 | 0.08472 | none |
| SLC35B3  | -0.142 | -0.2207 | -0.739 | 0.47737 | 0.632 | -6.29 | 1.03131 | none |
| YKT6     | -0.083 | -0.0215 | -0.739 | 0.4774  | 0.632 | -6.29 | 0.95087 | none |
| DTX4     | 0.134  | 0.1243  | 0.739  | 0.47746 | 0.632 | -6.29 | -0.5547 | none |
| TMEM164  | -0.137 | -0.035  | -0.739 | 0.47754 | 0.632 | -6.29 | -0.0301 | none |
| KRTAP9-8 | 0.059  | 0.0591  | 0.7388 | 0.47763 | 0.632 | -6.29 | -0.5246 | none |
| PTP4A3   | -0.101 | -0.1018 | -0.739 | 0.47763 | 0.632 | -6.29 | 1.20197 | none |
| PGLYRP1  | -0.079 | -0.0531 | -0.739 | 0.47764 | 0.632 | -6.29 | -0.1957 | none |
| PPP1R12B | 0.167  | 0.1718  | 0.7386 | 0.4777  | 0.632 | -6.29 | -0.5858 | none |
| PGM5     | 0.105  | 0.1329  | 0.7385 | 0.47777 | 0.632 | -6.29 | -0.3023 | none |
| FAM107A  | 0.049  | 0.0546  | 0.7382 | 0.47793 | 0.632 | -6.29 | -0.6434 | none |
| FBLN5    | 0.08   | 0.0188  | 0.7382 | 0.47793 | 0.632 | -6.29 | -0.1967 | none |
| MTMR6    | 0.109  | 0.0641  | 0.7379 | 0.4781  | 0.632 | -6.29 | 1.40532 | none |
| IL7      | -0.12  | -0.2215 | -0.737 | 0.47844 | 0.632 | -6.29 | -0.1736 | none |
| LGI3     | 0.05   | 0.053   | 0.7369 | 0.47868 | 0.633 | -6.29 | -0.8506 | none |
| MYBPC2   | 0.116  | 0.1205  | 0.7369 | 0.47873 | 0.633 | -6.29 | 0.9051  | none |
| RAB2A    | 0.062  | 0.0384  | 0.7367 | 0.47882 | 0.633 | -6.29 | 0.59749 | none |
| CGB7     | -0.049 | -0.031  | -0.737 | 0.47885 | 0.633 | -6.29 | 0       | none |
| SMPDL3A  | -0.088 | -0.0454 | -0.737 | 0.47889 | 0.633 | -6.29 | 0.57936 | none |
| GLUD2    | -0.049 | -0.0482 | -0.736 | 0.47899 | 0.633 | -6.29 | 0.70545 | none |
| C6ORF226 | -0.167 | -0.1271 | -0.736 | 0.47899 | 0.633 | -6.29 | 1.34741 | none |
| NAA38    | -0.129 | -0.1733 | -0.736 | 0.47899 | 0.633 | -6.29 | 0.53054 | none |
| MRPS25   | -0.083 | -0.0714 | -0.736 | 0.47901 | 0.633 | -6.29 | 0.0067  | none |
| RIPK4    | -0.05  | -0.033  | -0.736 | 0.4791  | 0.633 | -6.29 | 0.21716 | none |
| MGAT5    | 0.149  | 0.19    | 0.7361 | 0.47916 | 0.633 | -6.29 | 0.66354 | none |
| ASAP1    | -0.19  | 0.011   | -0.736 | 0.4793  | 0.633 | -6.29 | -0.0165 | none |
| LNX1     | 0.143  | 0.1128  | 0.7357 | 0.4794  | 0.633 | -6.29 | 0.98842 | none |
| CLEC9A   | 0.059  | 0.0587  | 0.7357 | 0.47942 | 0.633 | -6.29 | 1.2124  | none |
| LST1     | -0.151 | -0.2936 | -0.735 | 0.47955 | 0.633 | -6.29 | 1.15711 | none |
| FAM24B   | 0.124  | 0.0909  | 0.7354 | 0.47956 | 0.633 | -6.29 | 0.0546  | none |

|          |        |         |        |         |       |       |         |            |
|----------|--------|---------|--------|---------|-------|-------|---------|------------|
| MST1R    | -0.087 | -0.0132 | -0.735 | 0.47969 | 0.633 | -6.29 | 0.08133 | none       |
| GPR52    | -0.049 | -0.0306 | -0.735 | 0.47981 | 0.633 | -6.29 | 2.25038 | AA-related |
| KCNC3    | 0.058  | 0.094   | 0.735  | 0.47981 | 0.633 | -6.29 | 0.54314 | none       |
| FLVCR2   | 0.112  | 0.0962  | 0.7349 | 0.47989 | 0.633 | -6.29 | 0.97361 | none       |
| RBM42    | -0.064 | -0.0269 | -0.735 | 0.48005 | 0.634 | -6.29 | 0.52099 | none       |
| OR52D1   | -0.057 | -0.0574 | -0.735 | 0.48005 | 0.634 | -6.29 | 1.9054  | none       |
| ELF4     | 0.093  | 0.1193  | 0.7346 | 0.48007 | 0.634 | -6.29 | 0.58143 | none       |
| FGF23    | 0.095  | 0.0607  | 0.7345 | 0.48012 | 0.634 | -6.29 | -0.1772 | none       |
| FBLN2    | -0.123 | -0.0334 | -0.734 | 0.48024 | 0.634 | -6.29 | -0.3839 | none       |
| PRPF31   | 0.096  | 0.1633  | 0.7342 | 0.48027 | 0.634 | -6.29 | 0.54348 | none       |
| SSC5D    | 0.062  | 0.0898  | 0.734  | 0.48038 | 0.634 | -6.29 | 1.59834 | none       |
| XPC      | 0.134  | 0.2637  | 0.7336 | 0.48063 | 0.634 | -6.29 | 0.24447 | none       |
| MCTP1    | -0.092 | -0.0494 | -0.733 | 0.48077 | 0.634 | -6.29 | -0.2425 | none       |
| EFCC1    | -0.049 | -0.0242 | -0.733 | 0.48084 | 0.634 | -6.29 | 0       | none       |
| ZNF239   | -0.079 | -0.0745 | -0.733 | 0.48091 | 0.634 | -6.29 | 0.21068 | none       |
| NQO2     | 0.087  | -0.0014 | 0.733  | 0.48098 | 0.634 | -6.29 | -0.1438 | none       |
| ADAM8    | 0.087  | 0.1764  | 0.7329 | 0.48102 | 0.634 | -6.29 | 1.31558 | none       |
| PRF1     | 0.072  | 0.0811  | 0.7328 | 0.4811  | 0.634 | -6.29 | -0.2251 | none       |
| TRPM2    | 0.085  | 0.0939  | 0.7325 | 0.48128 | 0.635 | -6.29 | 0.15241 | none       |
| ADCY1    | -0.083 | -0.0555 | -0.732 | 0.48144 | 0.635 | -6.29 | 0.2631  | none       |
| KBTBD11  | 0.107  | 0.1427  | 0.732  | 0.48155 | 0.635 | -6.29 | 0.30114 | none       |
| RAB34    | -0.129 | -0.1754 | -0.732 | 0.48173 | 0.635 | -6.29 | 0.54646 | none       |
| TEKT2    | 0.085  | 0.0414  | 0.7317 | 0.48175 | 0.635 | -6.29 | -0.9254 | none       |
| USP1     | 0.162  | 0.2339  | 0.7315 | 0.48184 | 0.635 | -6.29 | 0.70035 | none       |
| SPEF1    | 0.054  | 0.0619  | 0.7315 | 0.48184 | 0.635 | -6.29 | -0.0862 | none       |
| ARHGAP21 | 0.177  | 0.2168  | 0.7311 | 0.48208 | 0.635 | -6.29 | -0.1437 | none       |
| SLC9A5   | 0.099  | 0.114   | 0.731  | 0.48215 | 0.635 | -6.29 | 0.59526 | none       |
| CDCA7L   | -0.097 | -0.0333 | -0.731 | 0.48216 | 0.635 | -6.29 | 2.09793 | AA-related |
| UTP18    | -0.064 | -0.0343 | -0.731 | 0.48235 | 0.635 | -6.29 | 1.99077 | none       |
| FAM228A  | 0.076  | 0.0784  | 0.7305 | 0.48241 | 0.635 | -6.29 | 0.08996 | none       |
| WNT8A    | -0.049 | -0.0494 | -0.731 | 0.48242 | 0.635 | -6.29 | -0.2181 | none       |
| CTSL     | -0.124 | -0.0858 | -0.73  | 0.48257 | 0.636 | -6.29 | 1.27315 | none       |
| PSMD12   | 0.083  | 0.1113  | 0.7302 | 0.4826  | 0.636 | -6.29 | 0.21092 | none       |
| GADD45B  | -0.19  | 0.0073  | -0.73  | 0.48281 | 0.636 | -6.29 | 1.89098 | none       |
| TIMD4    | 0.121  | 0.0235  | 0.7298 | 0.48286 | 0.636 | -6.29 | -0.0253 | none       |
| FBXL4    | 0.077  | -0.0167 | 0.7295 | 0.48302 | 0.636 | -6.29 | 0.44963 | none       |
| IL27     | -0.062 | -0.0171 | -0.729 | 0.48318 | 0.636 | -6.29 | 0.33711 | none       |
| TSPAN32  | 0.226  | 0.1214  | 0.729  | 0.4833  | 0.636 | -6.29 | 0.08057 | none       |
| BORA     | -0.131 | -0.1159 | -0.729 | 0.48333 | 0.636 | -6.29 | 1.1274  | none       |
| MAP3K8   | 0.086  | 0.0345  | 0.729  | 0.48333 | 0.636 | -6.29 | -0.6545 | none       |

|          |        |         |        |         |       |       |         |      |
|----------|--------|---------|--------|---------|-------|-------|---------|------|
| DAXX     | -0.245 | 0.0319  | -0.728 | 0.4837  | 0.637 | -6.29 | 0.4282  | none |
| ALKBH5   | 0.071  | 0.1004  | 0.728  | 0.48388 | 0.637 | -6.29 | 0.65908 | none |
| C5ORF15  | -0.117 | -0.1659 | -0.728 | 0.48395 | 0.637 | -6.29 | 0.5445  | none |
| CLCNKB   | -0.08  | -0.0799 | -0.728 | 0.48403 | 0.637 | -6.29 | -0.2456 | none |
| CHCHD5   | 0.143  | 0.0883  | 0.7277 | 0.48409 | 0.637 | -6.29 | -0.4345 | none |
| MRFAP1L1 | -0.059 | -0.1142 | -0.727 | 0.48429 | 0.637 | -6.29 | 0.4767  | none |
| EPOR     | -0.095 | -0.1074 | -0.727 | 0.48448 | 0.637 | -6.29 | 0.43055 | none |
| MMP2     | 0.062  | 0.0708  | 0.727  | 0.48448 | 0.637 | -6.29 | -0.5022 | none |
| TANK     | -0.134 | -0.0677 | -0.727 | 0.4847  | 0.638 | -6.3  | 1.54945 | none |
| PPP1CC   | 0.077  | -0.0192 | 0.7258 | 0.4852  | 0.638 | -6.3  | -0.0201 | none |
| RXRA     | 0.085  | 0.1373  | 0.7255 | 0.48533 | 0.638 | -6.3  | 0.30825 | none |
| SH3RF1   | 0.147  | 0.1812  | 0.7254 | 0.48543 | 0.638 | -6.3  | -0.5279 | none |
| IPO9     | 0.154  | 0.1893  | 0.7253 | 0.48547 | 0.638 | -6.3  | 0.58715 | none |
| CBARP    | -0.055 | -0.0345 | -0.725 | 0.48588 | 0.639 | -6.3  | 1.42756 | none |
| GNA14    | 0.062  | 0.0569  | 0.7246 | 0.48589 | 0.639 | -6.3  | 1.08718 | none |
| ANKRD63  | 0.055  | 0.0567  | 0.7244 | 0.48602 | 0.639 | -6.3  | 0.62656 | none |
| DLD      | -0.073 | -0.09   | -0.724 | 0.48618 | 0.639 | -6.3  | 0.77286 | none |
| TRPT1    | -0.111 | -0.1731 | -0.724 | 0.48619 | 0.639 | -6.3  | 1.00933 | none |
| NR3C1    | 0.101  | 0.115   | 0.7238 | 0.48635 | 0.639 | -6.3  | -0.1846 | none |
| SDR42E1  | -0.072 | -0.0778 | -0.724 | 0.4864  | 0.639 | -6.3  | -0.41   | none |
| TPRG1    | 0.202  | 0.036   | 0.7237 | 0.48641 | 0.639 | -6.3  | -0.7991 | none |
| SMC3     | 0.268  | 0.4291  | 0.7237 | 0.48641 | 0.639 | -6.3  | 0.41847 | none |
| CDR2L    | -0.077 | 0.0114  | -0.723 | 0.48654 | 0.639 | -6.3  | -0.0192 | none |
| FIZ1     | 0.135  | 0.1429  | 0.7232 | 0.48673 | 0.639 | -6.3  | 0.37516 | none |
| SHISA5   | 0.072  | 0.0119  | 0.7231 | 0.48676 | 0.639 | -6.3  | -0.4449 | none |
| LCN1     | 0.057  | 0.0571  | 0.7229 | 0.48688 | 0.64  | -6.3  | 0.44852 | none |
| FGG      | -0.071 | -0.0854 | -0.723 | 0.48689 | 0.64  | -6.3  | 0.56939 | none |
| LMCD1    | -0.081 | -0.0642 | -0.722 | 0.48727 | 0.64  | -6.3  | -0.2905 | none |
| LRRN4    | 0.069  | 0.0786  | 0.7221 | 0.48734 | 0.64  | -6.3  | -0.9418 | none |
| NKG7     | 0.182  | 0.0774  | 0.7221 | 0.48735 | 0.64  | -6.3  | 0.48655 | none |
| SDC1     | -0.052 | -0.052  | -0.722 | 0.48759 | 0.64  | -6.3  | 0.08681 | none |
| MICB     | -0.127 | -0.0458 | -0.722 | 0.48765 | 0.64  | -6.3  | 0.16539 | none |
| RANBP17  | -0.118 | -0.1342 | -0.721 | 0.48783 | 0.64  | -6.3  | 0.63478 | none |
| CDH24    | -0.054 | -0.0478 | -0.721 | 0.48805 | 0.641 | -6.3  | 0.32273 | none |
| GSC      | -0.053 | -0.0551 | -0.721 | 0.48816 | 0.641 | -6.3  | 0       | none |
| FMN1     | 0.062  | 0.026   | 0.7207 | 0.48817 | 0.641 | -6.3  | -0.8786 | none |
| SNX6     | 0.066  | 0.0043  | 0.7207 | 0.48817 | 0.641 | -6.3  | 0.76761 | none |
| IFT52    | 0.087  | -0.0532 | 0.7202 | 0.48849 | 0.641 | -6.3  | 0.17396 | none |
| FBXL19   | 0.188  | 0.2944  | 0.7201 | 0.48851 | 0.641 | -6.3  | 0.49924 | none |
| HMGXB4   | 0.12   | 0.1697  | 0.7201 | 0.48853 | 0.641 | -6.3  | 0.77531 | none |

|          |        |         |        |         |       |       |         |      |
|----------|--------|---------|--------|---------|-------|-------|---------|------|
| UPF2     | 0.203  | 0.2741  | 0.7197 | 0.48874 | 0.641 | -6.3  | -0.2147 | none |
| ADIPOR1  | -0.094 | -0.1265 | -0.72  | 0.4888  | 0.641 | -6.3  | 0.23871 | none |
| PPP1R26  | -0.113 | -0.0327 | -0.719 | 0.48907 | 0.642 | -6.3  | 0.34642 | none |
| RGS7BP   | 0.057  | 0.0566  | 0.7191 | 0.48911 | 0.642 | -6.3  | 1.16258 | none |
| HIST1H1T | -0.055 | -0.0555 | -0.719 | 0.4893  | 0.642 | -6.3  | -0.3521 | none |
| INSL5    | -0.055 | -0.0555 | -0.719 | 0.48932 | 0.642 | -6.3  | 1.9054  | none |
| FAHD2B   | -0.119 | -0.0421 | -0.719 | 0.48932 | 0.642 | -6.3  | 1.49957 | none |
| GPR148   | 0.062  | 0.0438  | 0.7187 | 0.48933 | 0.642 | -6.3  | 0.67502 | none |
| GBP2     | 0.195  | 0.28    | 0.7187 | 0.48937 | 0.642 | -6.3  | 0.851   | none |
| GBP5     | 0.16   | 0.184   | 0.7184 | 0.48955 | 0.642 | -6.3  | 0.7275  | none |
| BCL7C    | 0.084  | 0.0458  | 0.7183 | 0.48958 | 0.642 | -6.3  | -0.6513 | none |
| MAP1LC3A | 0.108  | -0.0064 | 0.718  | 0.48977 | 0.642 | -6.3  | -0.1745 | none |
| SRMS     | 0.055  | 0.0388  | 0.7179 | 0.4898  | 0.642 | -6.3  | 0       | none |
| PHLDA2   | 0.106  | 0.152   | 0.7179 | 0.48982 | 0.642 | -6.3  | 1.44226 | none |
| OSTC     | -0.116 | -0.2358 | -0.718 | 0.48982 | 0.642 | -6.3  | 0.4089  | none |
| SMIM15   | -0.096 | -0.1083 | -0.718 | 0.48986 | 0.642 | -6.3  | 1.83371 | none |
| UXS1     | 0.078  | 0.0915  | 0.7166 | 0.49058 | 0.643 | -6.3  | -0.6552 | none |
| SMIM18   | -0.367 | -0.288  | -0.716 | 0.49073 | 0.643 | -6.3  | 1.70328 | none |
| OTUD6B   | 0.158  | 0.1308  | 0.7161 | 0.4909  | 0.643 | -6.3  | -0.0808 | none |
| IL12A    | 0.157  | 0.1758  | 0.716  | 0.49097 | 0.643 | -6.3  | 0.68817 | none |
| SLC22A18 | -0.149 | -0.3053 | -0.716 | 0.491   | 0.643 | -6.3  | 0.36134 | none |
| CCDC115  | 0.107  | 0.0049  | 0.7159 | 0.49103 | 0.643 | -6.3  | 0.08179 | none |
| ANKRD31  | 0.05   | 0.0402  | 0.7158 | 0.49108 | 0.643 | -6.3  | -0.7578 | none |
| TLE1     | -0.095 | -0.0877 | -0.716 | 0.49121 | 0.643 | -6.3  | -0.2579 | none |
| ALDH3B2  | -0.096 | -0.0508 | -0.715 | 0.49135 | 0.643 | -6.3  | 0.47464 | none |
| C6ORF201 | -0.208 | -0.1228 | -0.715 | 0.49149 | 0.644 | -6.3  | 1.61679 | none |
| ADPRHL2  | -0.077 | -0.037  | -0.715 | 0.49155 | 0.644 | -6.3  | 0.82948 | none |
| DNER     | 0.068  | 0.0488  | 0.7149 | 0.49161 | 0.644 | -6.3  | 0.86371 | none |
| CTSF     | -0.08  | -0.0846 | -0.715 | 0.49164 | 0.644 | -6.3  | 1.76422 | none |
| ING2     | 0.11   | 0.1094  | 0.7148 | 0.49166 | 0.644 | -6.3  | 1.38101 | none |
| PGGT1B   | -0.165 | -0.1424 | -0.715 | 0.4918  | 0.644 | -6.3  | 0.55976 | none |
| HIST1H3A | 0.216  | 0.2178  | 0.7144 | 0.49188 | 0.644 | -6.3  | 0.3258  | none |
| PIGM     | 0.067  | 0.0164  | 0.7139 | 0.49219 | 0.644 | -6.3  | -0.7157 | none |
| CD300C   | 0.082  | 0.1416  | 0.7139 | 0.49221 | 0.644 | -6.3  | 0.51352 | none |
| GRM1     | 0.053  | 0.022   | 0.7132 | 0.49259 | 0.645 | -6.31 | -0.614  | none |
| SNX24    | -0.12  | -0.0979 | -0.713 | 0.49265 | 0.645 | -6.31 | 0.07572 | none |
| OR4Q3    | 0.1    | 0.0819  | 0.7131 | 0.49267 | 0.645 | -6.31 | -0.2337 | none |
| TMEM171  | 0.049  | 0.0647  | 0.7131 | 0.49267 | 0.645 | -6.31 | 0.07128 | none |
| MAZ      | -0.048 | -0.0145 | -0.713 | 0.49268 | 0.645 | -6.31 | 1.58169 | none |
| XPO7     | 0.15   | 0.2382  | 0.7128 | 0.49284 | 0.645 | -6.31 | 0.4544  | none |

|           |        |         |        |         |       |       |         |      |
|-----------|--------|---------|--------|---------|-------|-------|---------|------|
| AIDA      | 0.058  | 0.0252  | 0.7127 | 0.49287 | 0.645 | -6.31 | 0.59135 | none |
| OIT3      | -0.059 | -0.0591 | -0.713 | 0.49288 | 0.645 | -6.31 | 0.74937 | none |
| DNAH1     | 0.096  | 0.1974  | 0.7125 | 0.493   | 0.645 | -6.31 | 1.54026 | none |
| HARS      | 0.08   | 0.0792  | 0.712  | 0.49329 | 0.645 | -6.31 | 0.07937 | none |
| PDCL3     | -0.064 | -0.0887 | -0.712 | 0.49346 | 0.645 | -6.31 | -0.5849 | none |
| ARRDC4    | 0.051  | 0.0475  | 0.7117 | 0.49348 | 0.645 | -6.31 | 1.18718 | none |
| WDYHV1    | -0.094 | -0.1665 | -0.712 | 0.49348 | 0.645 | -6.31 | 0.80654 | none |
| FAM174A   | -0.123 | -0.117  | -0.711 | 0.49376 | 0.645 | -6.31 | 1.61181 | none |
| GJC3      | -0.05  | -0.065  | -0.711 | 0.49384 | 0.646 | -6.31 | 1.65341 | none |
| FCRL4     | 0.06   | 0.0764  | 0.7111 | 0.49385 | 0.646 | -6.31 | -0.1498 | none |
| ITGA9     | 0.08   | 0.0989  | 0.7109 | 0.49399 | 0.646 | -6.31 | 0.42551 | none |
| SDF2L1    | -0.088 | -0.0976 | -0.711 | 0.49412 | 0.646 | -6.31 | 0.50497 | none |
| PLEKHO2   | 0.068  | 0.0382  | 0.7104 | 0.49426 | 0.646 | -6.31 | 0.36955 | none |
| BATF3     | -0.122 | -0.1414 | -0.71  | 0.49445 | 0.646 | -6.31 | 1.1065  | none |
| RDH14     | -0.091 | -0.0644 | -0.71  | 0.49464 | 0.646 | -6.31 | 1.92763 | none |
| PPP1R3C   | 0.065  | 0.0152  | 0.7097 | 0.49467 | 0.646 | -6.31 | -0.8385 | none |
| UAP1      | 0.102  | 0.0231  | 0.7094 | 0.49485 | 0.646 | -6.31 | 0.45737 | none |
| OR4A16    | 0.055  | 0.0554  | 0.7094 | 0.49487 | 0.646 | -6.31 | 0.66005 | none |
| RPL36A-HI | -0.157 | -0.1395 | -0.709 | 0.49488 | 0.646 | -6.31 | 1.41152 | none |
| GPR65     | 0.071  | -0.0575 | 0.709  | 0.49507 | 0.647 | -6.31 | -0.032  | none |
| BRAT1     | 0.05   | 0.0649  | 0.7087 | 0.49524 | 0.647 | -6.31 | 0.62442 | none |
| MYBPH     | 0.046  | 0.0511  | 0.7085 | 0.49537 | 0.647 | -6.31 | 0       | none |
| CD74      | 0.131  | 0.1558  | 0.7083 | 0.49548 | 0.647 | -6.31 | 0.34875 | none |
| PPP1CB    | 0.093  | 0.0108  | 0.7082 | 0.49555 | 0.647 | -6.31 | -0.681  | none |
| OR52B6    | 0.055  | 0.0553  | 0.7082 | 0.49556 | 0.647 | -6.31 | -0.5265 | none |
| C20ORF17  | 0.099  | 0.0988  | 0.7076 | 0.49591 | 0.647 | -6.31 | 0.67856 | none |
| ZNF485    | 0.114  | 0.1303  | 0.7075 | 0.49599 | 0.647 | -6.31 | 0.01106 | none |
| SREK1     | 0.178  | 0.2913  | 0.7074 | 0.49601 | 0.647 | -6.31 | -0.2886 | none |
| SMR3B     | 0.055  | 0.0552  | 0.7074 | 0.49604 | 0.647 | -6.31 | 0.08915 | none |
| VHLL      | 0.055  | 0.0552  | 0.7074 | 0.49604 | 0.647 | -6.31 | -0.7211 | none |
| SS18L2    | -0.102 | -0.1974 | -0.707 | 0.49611 | 0.647 | -6.31 | 0.1322  | none |
| SLC3A2    | -0.066 | -0.006  | -0.707 | 0.49638 | 0.648 | -6.31 | 0.84603 | none |
| DKK4      | 0.05   | 0.0547  | 0.7067 | 0.49647 | 0.648 | -6.31 | 1.58387 | none |
| CBFA2T3   | 0.078  | 0.1232  | 0.7066 | 0.49649 | 0.648 | -6.31 | -0.7356 | none |
| MPZ       | -0.08  | -0.0203 | -0.707 | 0.49653 | 0.648 | -6.31 | 1.57719 | none |
| SRSF9     | -0.09  | -0.0611 | -0.707 | 0.49654 | 0.648 | -6.31 | 0.3103  | none |
| C11ORF71  | 0.135  | 0.0598  | 0.706  | 0.49686 | 0.648 | -6.31 | 0.15593 | none |
| APOBEC3E  | -0.137 | -0.0677 | -0.706 | 0.497   | 0.648 | -6.31 | 1.37454 | none |
| OR2Z1     | -0.056 | -0.0171 | -0.706 | 0.49701 | 0.648 | -6.31 | 0.10458 | none |
| TXNDC15   | 0.087  | -0.0384 | 0.7058 | 0.49701 | 0.648 | -6.31 | -0.7707 | none |

|           |        |         |        |         |       |       |         |            |
|-----------|--------|---------|--------|---------|-------|-------|---------|------------|
| TFPI2     | 0.052  | 0.0546  | 0.7058 | 0.49702 | 0.648 | -6.31 | -0.8452 | none       |
| TVP23C-CI | 0.213  | 0.0833  | 0.7056 | 0.49709 | 0.648 | -6.31 | 0.18226 | none       |
| KRBOX4    | 0.132  | 0.1178  | 0.7056 | 0.49709 | 0.648 | -6.31 | 0.06928 | none       |
| SLC38A4   | -0.053 | -0.0536 | -0.706 | 0.49709 | 0.648 | -6.31 | 0.5382  | none       |
| C19ORF24  | -0.144 | -0.0917 | -0.706 | 0.49714 | 0.648 | -6.31 | 1.29642 | none       |
| TNFRSF8   | 0.093  | 0.1689  | 0.7053 | 0.49727 | 0.648 | -6.31 | 0.08581 | none       |
| ITLN2     | -0.054 | -0.0539 | -0.705 | 0.49728 | 0.648 | -6.31 | -0.7212 | none       |
| LIG3      | 0.097  | 0.2006  | 0.7051 | 0.49742 | 0.648 | -6.31 | 1.3002  | none       |
| NUP54     | 0.096  | 0.0257  | 0.7049 | 0.49753 | 0.648 | -6.31 | -0.6411 | none       |
| DEFA6     | 0.055  | 0.0548  | 0.7042 | 0.49792 | 0.649 | -6.31 | 0.66005 | none       |
| KDR       | -0.074 | -0.0511 | -0.704 | 0.49808 | 0.649 | -6.31 | 0.0539  | none       |
| NPRL2     | -0.065 | -0.0987 | -0.704 | 0.49832 | 0.649 | -6.31 | 1.23873 | none       |
| SRD5A3    | 0.098  | 0.0022  | 0.7035 | 0.49834 | 0.649 | -6.31 | 1.01971 | none       |
| SLC35G6   | 0.052  | 0.0374  | 0.7035 | 0.49838 | 0.649 | -6.31 | 0.97443 | none       |
| COX14     | -0.115 | -0.1732 | -0.703 | 0.4984  | 0.649 | -6.31 | 0.89668 | none       |
| UBR7      | -0.069 | -0.0678 | -0.703 | 0.4985  | 0.649 | -6.31 | 1.69837 | none       |
| OBSCN     | 0.106  | 0.1426  | 0.7033 | 0.4985  | 0.649 | -6.31 | -0.6322 | none       |
| DHX16     | 0.136  | 0.2582  | 0.7027 | 0.49886 | 0.65  | -6.31 | 0.79826 | none       |
| ATP12A    | 0.047  | 0.0473  | 0.7025 | 0.49895 | 0.65  | -6.31 | 0.46778 | none       |
| CBY1      | 0.104  | 0.069   | 0.7025 | 0.49898 | 0.65  | -6.31 | 0.9977  | none       |
| DCP2      | 0.179  | 0.1014  | 0.7024 | 0.49904 | 0.65  | -6.31 | 0.49758 | none       |
| SENP3     | -0.084 | 0.0102  | -0.702 | 0.49904 | 0.65  | -6.31 | 0.61259 | none       |
| SPAG8     | 0.089  | 0.0865  | 0.7021 | 0.4992  | 0.65  | -6.31 | 0.97526 | none       |
| MCCD1     | 0.055  | 0.0545  | 0.7019 | 0.4993  | 0.65  | -6.31 | 0.66005 | none       |
| GPS1      | 0.095  | 0.0818  | 0.7019 | 0.49933 | 0.65  | -6.31 | -0.4148 | none       |
| KRT2      | 0.062  | 0.069   | 0.7016 | 0.49947 | 0.65  | -6.31 | 0.48712 | none       |
| SEC61A1   | 0.073  | 0.0521  | 0.7016 | 0.49949 | 0.65  | -6.31 | 1.08782 | none       |
| SLC43A3   | -0.084 | 0.0074  | -0.701 | 0.49958 | 0.65  | -6.31 | 1.0456  | none       |
| ANGPTL7   | -0.055 | -0.057  | -0.701 | 0.49992 | 0.65  | -6.31 | 1.14986 | none       |
| ATXN7L3   | -0.074 | 0.0238  | -0.701 | 0.49997 | 0.65  | -6.31 | 1.42989 | none       |
| LECT2     | -0.107 | -0.0803 | -0.701 | 0.49999 | 0.65  | -6.31 | 0.00909 | none       |
| BSPH1     | 0.056  | 0.056   | 0.7007 | 0.50003 | 0.65  | -6.31 | -0.1117 | none       |
| PRR26     | 0.051  | 0.021   | 0.7006 | 0.5001  | 0.65  | -6.31 | -0.1462 | none       |
| GBE1      | -0.147 | -0.1113 | -0.7   | 0.50017 | 0.65  | -6.31 | 2.14384 | AA-related |
| ADORA2B   | -0.073 | -0.071  | -0.7   | 0.50018 | 0.65  | -6.31 | 0.12115 | none       |
| CNOT8     | -0.062 | -0.1149 | -0.7   | 0.50021 | 0.65  | -6.31 | 0.20466 | none       |
| TOMM34    | 0.095  | 0.1565  | 0.7004 | 0.50023 | 0.65  | -6.31 | -0.1258 | none       |
| TIFA      | 0.09   | -0.0211 | 0.7    | 0.50046 | 0.651 | -6.31 | 1.39403 | none       |
| AGBL2     | 0.115  | 0.0854  | 0.6998 | 0.50053 | 0.651 | -6.31 | -0.0649 | none       |
| NKRF      | 0.127  | 0.2081  | 0.6997 | 0.50061 | 0.651 | -6.31 | 1.15101 | none       |



|          |        |         |        |         |       |       |         |      |
|----------|--------|---------|--------|---------|-------|-------|---------|------|
| SPATA32  | 0.164  | 0.1356  | 0.6997 | 0.50061 | 0.651 | -6.31 | -0.048  | none |
| KLF2     | -0.189 | -0.275  | -0.7   | 0.50069 | 0.651 | -6.31 | 0.06724 | none |
| ZNF695   | 0.125  | 0.117   | 0.6995 | 0.50075 | 0.651 | -6.32 | 1.32841 | none |
| UBQLN4   | 0.112  | 0.1666  | 0.6994 | 0.50079 | 0.651 | -6.32 | 0.04161 | none |
| MBNL2    | 0.099  | 0.1332  | 0.6992 | 0.5009  | 0.651 | -6.32 | 0.43693 | none |
| ADAMTS1  | 0.054  | 0.0542  | 0.6992 | 0.50092 | 0.651 | -6.32 | 1.19688 | none |
| RCC2     | 0.079  | 0.1416  | 0.6991 | 0.50099 | 0.651 | -6.32 | -0.379  | none |
| C6ORF223 | 0.052  | 0.0075  | 0.6984 | 0.50143 | 0.651 | -6.32 | -0.507  | none |
| SMAD7    | 0.107  | 0.1626  | 0.6983 | 0.50149 | 0.651 | -6.32 | 0.47313 | none |
| ABI1     | -0.076 | -0.1488 | -0.698 | 0.5015  | 0.651 | -6.32 | 1.15941 | none |
| CYB5A    | -0.095 | -0.1874 | -0.698 | 0.50151 | 0.651 | -6.32 | 0.48546 | none |
| PIK3R6   | -0.06  | -0.0273 | -0.698 | 0.50172 | 0.652 | -6.32 | 1.47315 | none |
| TATDN1   | 0.102  | -0.0284 | 0.6978 | 0.50176 | 0.652 | -6.32 | 0.46979 | none |
| MEGF6    | -0.106 | -0.0419 | -0.698 | 0.50177 | 0.652 | -6.32 | 0.75355 | none |
| C19ORF73 | -0.104 | #####   | -0.698 | 0.50179 | 0.652 | -6.32 | 0.42971 | none |
| ADGRB1   | 0.086  | 0.0949  | 0.6976 | 0.50185 | 0.652 | -6.32 | 0.90835 | none |
| E4F1     | -0.12  | 0.0467  | -0.698 | 0.50187 | 0.652 | -6.32 | 1.46018 | none |
| NR2C2AP  | -0.086 | -0.0732 | -0.698 | 0.5019  | 0.652 | -6.32 | 0.62666 | none |
| USP30    | 0.132  | 0.08    | 0.6975 | 0.50191 | 0.652 | -6.32 | 0.96463 | none |
| OR56A5   | -0.053 | -0.053  | -0.697 | 0.5021  | 0.652 | -6.32 | 1.85525 | none |
| INO80B   | -0.148 | -0.0184 | -0.697 | 0.50233 | 0.652 | -6.32 | 1.29619 | none |
| CLDN10   | 0.049  | 0.0482  | 0.6967 | 0.5024  | 0.652 | -6.32 | 1.49129 | none |
| DDAH2    | -0.147 | -0.1559 | -0.697 | 0.5024  | 0.652 | -6.32 | 0.7959  | none |
| MAD1L1   | 0.086  | 0.0455  | 0.6966 | 0.5025  | 0.652 | -6.32 | -0.6499 | none |
| CAPG     | 0.086  | 0.0757  | 0.6957 | 0.50301 | 0.653 | -6.32 | 1.09877 | none |
| KCNE1B   | -0.079 | -0.0533 | -0.696 | 0.5031  | 0.653 | -6.32 | 1.28781 | none |
| NUDCD1   | -0.101 | -0.1163 | -0.695 | 0.50316 | 0.653 | -6.32 | 1.24507 | none |
| BRF2     | -0.112 | -0.0353 | -0.695 | 0.50327 | 0.653 | -6.32 | 0.91954 | none |
| CCDC136  | 0.289  | 0.2177  | 0.6952 | 0.5033  | 0.653 | -6.32 | -0.8542 | none |
| OSBP     | 0.139  | 0.1925  | 0.6952 | 0.50333 | 0.653 | -6.32 | -0.0755 | none |
| FOLR1    | -0.077 | -0.0601 | -0.695 | 0.50336 | 0.653 | -6.32 | 1.05875 | none |
| INVS     | 0.114  | 0.1714  | 0.6948 | 0.50356 | 0.653 | -6.32 | 0.91129 | none |
| GNB3     | 0.171  | 0.1006  | 0.6948 | 0.50356 | 0.653 | -6.32 | -0.1138 | none |
| STOX2    | 0.052  | 0.0559  | 0.6947 | 0.50359 | 0.653 | -6.32 | 0.70046 | none |
| DIXDC1   | 0.191  | 0.3294  | 0.6947 | 0.50359 | 0.653 | -6.32 | -0.4064 | none |
| COL4A6   | 0.052  | 0.051   | 0.6946 | 0.50365 | 0.653 | -6.32 | -0.7515 | none |
| C10ORF14 | 0.054  | 0.0536  | 0.6943 | 0.50387 | 0.653 | -6.32 | -0.665  | none |
| LIPM     | 0.052  | 0.0532  | 0.694  | 0.50401 | 0.653 | -6.32 | 0.53627 | none |
| EDC4     | 0.132  | 0.2509  | 0.6937 | 0.50419 | 0.654 | -6.32 | 0.6643  | none |
| CDHR1    | -0.09  | -0.0597 | -0.694 | 0.50426 | 0.654 | -6.32 | -0.0878 | none |

|          |        |         |        |         |       |       |         |      |
|----------|--------|---------|--------|---------|-------|-------|---------|------|
| GRK6     | 0.081  | 0.1251  | 0.6935 | 0.50432 | 0.654 | -6.32 | -0.314  | none |
| GJA5     | -0.053 | -0.0535 | -0.693 | 0.50435 | 0.654 | -6.32 | 0.83551 | none |
| FAM162B  | 0.054  | 0.0535  | 0.6935 | 0.50436 | 0.654 | -6.32 | -0.5288 | none |
| EGLN3    | 0.125  | 0.0252  | 0.6933 | 0.50445 | 0.654 | -6.32 | 0.17957 | none |
| ACOT9    | 0.081  | -0.0174 | 0.6932 | 0.50453 | 0.654 | -6.32 | -0.1539 | none |
| PERM1    | -0.083 | -0.0133 | -0.693 | 0.5046  | 0.654 | -6.32 | 1.16565 | none |
| AL049872 | -0.233 | -0.2243 | -0.693 | 0.50476 | 0.654 | -6.32 | 1.10672 | none |
| CORO6    | -0.121 | -0.0632 | -0.693 | 0.50487 | 0.654 | -6.32 | 1.28857 | none |
| LAMC1    | 0.079  | 0.0762  | 0.6926 | 0.50488 | 0.654 | -6.32 | -0.527  | none |
| CPSF7    | 0.078  | 0.1206  | 0.6915 | 0.50553 | 0.655 | -6.32 | -0.1449 | none |
| SGSM3    | 0.065  | 0.0563  | 0.6914 | 0.50559 | 0.655 | -6.32 | 0.63858 | none |
| FASTKD2  | 0.077  | 0.0311  | 0.6907 | 0.506   | 0.655 | -6.32 | 1.17327 | none |
| POLD2    | -0.078 | -0.0344 | -0.69  | 0.50629 | 0.656 | -6.32 | 0.8678  | none |
| TBCD     | 0.133  | 0.1607  | 0.69   | 0.50641 | 0.656 | -6.32 | 1.13916 | none |
| SLC35G4  | 0.054  | 0.0537  | 0.6896 | 0.50671 | 0.656 | -6.32 | -0.8278 | none |
| CST9L    | 0.053  | 0.053   | 0.6894 | 0.50678 | 0.656 | -6.32 | 1.19688 | none |
| SMIM20   | -0.121 | -0.1231 | -0.689 | 0.50683 | 0.656 | -6.32 | 1.50234 | none |
| TPK1     | 0.094  | 0.0361  | 0.6893 | 0.50687 | 0.656 | -6.32 | 1.35785 | none |
| CEMIP    | 0.083  | 0.1062  | 0.6892 | 0.50695 | 0.656 | -6.32 | -0.8169 | none |
| C2CD4B   | -0.058 | -0.0471 | -0.689 | 0.50704 | 0.656 | -6.32 | 0.22443 | none |
| KLK8     | -0.121 | -0.1205 | -0.689 | 0.5071  | 0.656 | -6.32 | 0.28585 | none |
| AGPAT2   | 0.099  | 0.054   | 0.6889 | 0.50712 | 0.656 | -6.32 | -0.053  | none |
| RAP2A    | 0.053  | 0.0694  | 0.6886 | 0.5073  | 0.656 | -6.32 | 0.87589 | none |
| PVALB    | 0.05   | 0.0436  | 0.6877 | 0.5078  | 0.657 | -6.32 | 0.61885 | none |
| MS4A3    | 0.048  | 0.0613  | 0.6876 | 0.50791 | 0.657 | -6.32 | 1.93555 | none |
| IRF6     | -0.08  | -0.0574 | -0.687 | 0.50804 | 0.657 | -6.32 | -0.1306 | none |
| CALHM1   | -0.049 | -0.0368 | -0.687 | 0.50816 | 0.657 | -6.32 | -0.1361 | none |
| RBM38    | -0.088 | -0.0479 | -0.687 | 0.50852 | 0.658 | -6.32 | -0.1485 | none |
| CCL20    | 0.153  | 0.0248  | 0.6864 | 0.50863 | 0.658 | -6.32 | 0.76134 | none |
| TRIM32   | 0.069  | 0.0179  | 0.6863 | 0.50867 | 0.658 | -6.32 | 0.0975  | none |
| NRBF2    | -0.087 | -0.049  | -0.686 | 0.50872 | 0.658 | -6.32 | 0.56392 | none |
| GOLGA8F  | 0.045  | 0.055   | 0.6859 | 0.50889 | 0.658 | -6.32 | -0.076  | none |
| DLG2     | -0.098 | -0.0667 | -0.686 | 0.50894 | 0.658 | -6.32 | 1.34994 | none |
| CYP4F11  | -0.051 | -0.0314 | -0.686 | 0.50905 | 0.658 | -6.32 | 0.67906 | none |
| SASS6    | 0.127  | 0.1844  | 0.6856 | 0.50907 | 0.658 | -6.32 | 0.42254 | none |
| KIFAP3   | -0.075 | -0.099  | -0.686 | 0.50911 | 0.658 | -6.32 | 1.54262 | none |
| PTBP1    | 0.082  | 0.1662  | 0.6856 | 0.50911 | 0.658 | -6.32 | 1.46179 | none |
| NXF5     | 0.053  | 0.065   | 0.6854 | 0.50919 | 0.658 | -6.33 | 0.66409 | none |
| BDH2     | 0.135  | 0.019   | 0.6849 | 0.5095  | 0.658 | -6.33 | 0.41451 | none |
| CHST15   | 0.073  | 0.1006  | 0.6849 | 0.5095  | 0.658 | -6.33 | 1.36879 | none |

|          |        |         |        |         |       |       |         |      |
|----------|--------|---------|--------|---------|-------|-------|---------|------|
| SUV39H1  | -0.062 | 0.0103  | -0.685 | 0.50961 | 0.658 | -6.33 | 1.25136 | none |
| DRD3     | -0.048 | -0.0524 | -0.685 | 0.50965 | 0.658 | -6.33 | 1.48116 | none |
| IFNGR2   | -0.108 | -0.1261 | -0.684 | 0.50979 | 0.659 | -6.33 | 0.47372 | none |
| CSDE1    | 0.091  | 0.0954  | 0.6844 | 0.5098  | 0.659 | -6.33 | 1.08289 | none |
| CASZ1    | 0.075  | 0.0477  | 0.684  | 0.51006 | 0.659 | -6.33 | 0.76241 | none |
| SNX17    | -0.086 | -0.1024 | -0.684 | 0.5101  | 0.659 | -6.33 | 0.49164 | none |
| WDR87    | 0.062  | 0.0625  | 0.6839 | 0.51013 | 0.659 | -6.33 | -0.7553 | none |
| TUBB     | -0.066 | -0.039  | -0.684 | 0.51019 | 0.659 | -6.33 | 1.39929 | none |
| AGTR1    | -0.051 | -0.0515 | -0.684 | 0.51021 | 0.659 | -6.33 | 0       | none |
| CACNA1G  | 0.124  | 0.1027  | 0.6829 | 0.51073 | 0.659 | -6.33 | 0.48119 | none |
| EXO1     | 0.136  | 0.1816  | 0.6827 | 0.51083 | 0.659 | -6.33 | 0.06219 | none |
| ITPKA    | -0.073 | -0.0261 | -0.683 | 0.51086 | 0.659 | -6.33 | 1.31552 | none |
| ABTB1    | 0.068  | 0.0204  | 0.6827 | 0.51086 | 0.659 | -6.33 | -0.4539 | none |
| A2M      | -0.21  | -0.2045 | -0.683 | 0.51095 | 0.659 | -6.33 | 0.42102 | none |
| THBS2    | 0.108  | 0.0926  | 0.6821 | 0.51121 | 0.66  | -6.33 | -0.1409 | none |
| CASD1    | -0.161 | -0.1643 | -0.682 | 0.51142 | 0.66  | -6.33 | 1.27678 | none |
| CDO1     | 0.053  | 0.0529  | 0.6816 | 0.51148 | 0.66  | -6.33 | 0.02895 | none |
| IGFBP3   | 0.14   | 0.1174  | 0.6815 | 0.51159 | 0.66  | -6.33 | -0.1291 | none |
| COBL     | 0.064  | 0.0599  | 0.6812 | 0.51175 | 0.66  | -6.33 | 0.5923  | none |
| OR51F2   | 0.052  | 0.0521  | 0.6812 | 0.51178 | 0.66  | -6.33 | 0.66005 | none |
| SMIM3    | -0.092 | -0.1536 | -0.681 | 0.51199 | 0.66  | -6.33 | 0.13819 | none |
| FAAP20   | 0.107  | 0.0768  | 0.6804 | 0.51223 | 0.661 | -6.33 | -0.7704 | none |
| NEK3     | -0.105 | -0.1012 | -0.68  | 0.51227 | 0.661 | -6.33 | 0.14409 | none |
| CPSF3    | -0.061 | -0.065  | -0.68  | 0.51243 | 0.661 | -6.33 | 0.20185 | none |
| FAM219B  | 0.089  | 0.0966  | 0.6801 | 0.51244 | 0.661 | -6.33 | 0.23664 | none |
| ALG12    | -0.133 | -0.079  | -0.68  | 0.51244 | 0.661 | -6.33 | 0.50005 | none |
| ANKRD23  | -0.083 | -0.0543 | -0.68  | 0.51245 | 0.661 | -6.33 | 0.10641 | none |
| SIX5     | -0.063 | -0.0012 | -0.679 | 0.51292 | 0.661 | -6.33 | 0.96595 | none |
| ZNF638   | 0.113  | 0.183   | 0.679  | 0.51305 | 0.661 | -6.33 | 0.86022 | none |
| TRIM77   | 0.052  | 0.0518  | 0.6786 | 0.51335 | 0.662 | -6.33 | 0.89752 | none |
| KRT73    | 0.049  | 0.0571  | 0.678  | 0.5137  | 0.662 | -6.33 | 0.26433 | none |
| KRTAP1-3 | -0.051 | -0.0507 | -0.677 | 0.51415 | 0.663 | -6.33 | 1.9054  | none |
| AJAP1    | 0.049  | 0.0596  | 0.6764 | 0.51468 | 0.663 | -6.33 | -0.3595 | none |
| STX18    | 0.148  | 0.1633  | 0.6763 | 0.51474 | 0.663 | -6.33 | 1.14371 | none |
| TGFB111  | 0.126  | 0.1097  | 0.676  | 0.5149  | 0.663 | -6.33 | 0.02796 | none |
| SLC34A2  | 0.181  | 0.169   | 0.676  | 0.5149  | 0.663 | -6.33 | 0.46888 | none |
| HLX      | -0.051 | 0.003   | -0.676 | 0.51498 | 0.664 | -6.33 | 1.46011 | none |
| DPP3     | 0.073  | 0.0752  | 0.6757 | 0.51506 | 0.664 | -6.33 | 0.37497 | none |
| MMP8     | 0.071  | 0.0642  | 0.6757 | 0.51511 | 0.664 | -6.33 | 0.05616 | none |
| PPP4R1   | 0.101  | 0.0783  | 0.6753 | 0.51535 | 0.664 | -6.33 | -0.8322 | none |

|           |        |         |        |         |       |       |          |      |
|-----------|--------|---------|--------|---------|-------|-------|----------|------|
| SURF2     | 0.093  | 0.1121  | 0.6753 | 0.51536 | 0.664 | -6.33 | 0.30584  | none |
| IGFBP7    | 0.086  | 0.053   | 0.6751 | 0.51543 | 0.664 | -6.33 | -0.7284  | none |
| MZF1      | 0.082  | 0.0865  | 0.6747 | 0.51569 | 0.664 | -6.33 | 0.95641  | none |
| MRPS12    | -0.092 | -0.0968 | -0.674 | 0.51582 | 0.664 | -6.33 | 0.79505  | none |
| OSBPL8    | 0.155  | 0.26    | 0.6744 | 0.51589 | 0.664 | -6.33 | 0.35902  | none |
| SAMD9     | 0.192  | 0.3011  | 0.6736 | 0.51634 | 0.665 | -6.33 | 0.58483  | none |
| STK11IP   | 0.096  | 0.1494  | 0.6734 | 0.51647 | 0.665 | -6.33 | 0.71915  | none |
| IQSEC1    | 0.179  | 0.2823  | 0.6734 | 0.51647 | 0.665 | -6.33 | -0.1041  | none |
| EBNA1BP2  | -0.061 | -0.0192 | -0.673 | 0.51666 | 0.665 | -6.33 | 2.90E-04 | none |
| TKTL1     | -0.161 | -0.1371 | -0.673 | 0.5167  | 0.665 | -6.33 | 1.72842  | none |
| DPEP1     | 0.095  | 0.1573  | 0.6729 | 0.51678 | 0.665 | -6.33 | 0.13819  | none |
| ALOX12    | -0.062 | 0.0677  | -0.673 | 0.51679 | 0.665 | -6.33 | 0.23409  | none |
| C8ORF88   | -0.115 | -0.077  | -0.673 | 0.5169  | 0.665 | -6.33 | 1.86027  | none |
| PAGE4     | 0.06   | 0.056   | 0.6726 | 0.51699 | 0.665 | -6.33 | 1.6921   | none |
| SLC22A16  | -0.054 | -0.0759 | -0.672 | 0.51743 | 0.666 | -6.33 | -0.3688  | none |
| ARHGEF11  | 0.111  | 0.113   | 0.6717 | 0.51753 | 0.666 | -6.33 | 0.22716  | none |
| C6ORF48   | 0.076  | 0.0713  | 0.6716 | 0.51761 | 0.666 | -6.33 | 0.10419  | none |
| BTNL2     | 0.066  | 0.0664  | 0.6715 | 0.51762 | 0.666 | -6.33 | 1.13082  | none |
| HIST1H2BI | 0.11   | 0.0127  | 0.6714 | 0.51771 | 0.666 | -6.33 | 0.38804  | none |
| SESTD1    | 0.202  | 0.2849  | 0.6713 | 0.51774 | 0.666 | -6.33 | 0.07479  | none |
| PPP1R42   | 0.175  | 0.1162  | 0.6713 | 0.51777 | 0.666 | -6.33 | 1.18614  | none |
| TREML2    | 0.101  | 0.1559  | 0.6713 | 0.51777 | 0.666 | -6.33 | -0.2247  | none |
| HNRNPA3   | 0.097  | 0.1008  | 0.6712 | 0.51782 | 0.666 | -6.34 | 0.65435  | none |
| METTL23   | -0.09  | -0.1556 | -0.671 | 0.518   | 0.666 | -6.34 | 0.79794  | none |
| RHBDL3    | 0.064  | 0.068   | 0.6708 | 0.51808 | 0.666 | -6.34 | 1.17066  | none |
| HIST1H2BI | -0.165 | -0.1612 | -0.671 | 0.51815 | 0.666 | -6.34 | 1.07102  | none |
| ORM2      | -0.062 | -0.0685 | -0.671 | 0.5182  | 0.666 | -6.34 | 0.64577  | none |
| SLC10A1   | -0.055 | -0.0366 | -0.67  | 0.51851 | 0.667 | -6.34 | 1.53032  | none |
| RNF17     | 0.056  | 0.0442  | 0.6691 | 0.51909 | 0.667 | -6.34 | -0.5722  | none |
| ALOX12B   | 0.106  | 0.0966  | 0.6688 | 0.51931 | 0.667 | -6.34 | -0.6714  | none |
| PNMA1     | 0.072  | 0.056   | 0.6687 | 0.51933 | 0.667 | -6.34 | 0.45013  | none |
| PDYN      | 0.181  | 0.1814  | 0.6683 | 0.51959 | 0.668 | -6.34 | 0.86642  | none |
| OR6C68    | -0.05  | -0.0498 | -0.668 | 0.5197  | 0.668 | -6.34 | -0.2081  | none |
| PANX1     | 0.078  | 0.0939  | 0.6679 | 0.51984 | 0.668 | -6.34 | 0.50638  | none |
| XG        | -0.05  | -0.0497 | -0.668 | 0.51986 | 0.668 | -6.34 | 1.9054   | none |
| SCAMP3    | -0.072 | -0.0659 | -0.667 | 0.52012 | 0.668 | -6.34 | -0.0329  | none |
| MUCL1     | 0.047  | 0.0567  | 0.6674 | 0.52013 | 0.668 | -6.34 | 0.55246  | none |
| H2BFS     | -0.088 | -0.1357 | -0.667 | 0.52015 | 0.668 | -6.34 | 1.0612   | none |
| MKRN2OS   | 0.094  | 0.1222  | 0.6673 | 0.52022 | 0.668 | -6.34 | 3.63E-04 | none |
| GPAM      | 0.12   | 0.1236  | 0.6666 | 0.52062 | 0.669 | -6.34 | 0.75113  | none |

|           |        |         |        |         |       |       |         |      |
|-----------|--------|---------|--------|---------|-------|-------|---------|------|
| RDH8      | 0.179  | 0.193   | 0.6665 | 0.52069 | 0.669 | -6.34 | 0.44928 | none |
| TAF6L     | -0.114 | -0.0212 | -0.666 | 0.52073 | 0.669 | -6.34 | -0.1453 | none |
| CXORF40B  | -0.074 | -0.1052 | -0.666 | 0.52074 | 0.669 | -6.34 | 1.19158 | none |
| BEGAIN    | 0.104  | 0.2011  | 0.6659 | 0.52105 | 0.669 | -6.34 | 1.04173 | none |
| FSD1L     | -0.081 | -0.0212 | -0.666 | 0.52107 | 0.669 | -6.34 | -0.0956 | none |
| TCEA3     | 0.108  | 0.0747  | 0.6657 | 0.52117 | 0.669 | -6.34 | -0.1183 | none |
| RFC5      | -0.078 | -0.106  | -0.665 | 0.52135 | 0.669 | -6.34 | 1.67155 | none |
| LEPROTL1  | 0.11   | -0.0711 | 0.6653 | 0.52142 | 0.669 | -6.34 | -0.2325 | none |
| ISM2      | -0.05  | -0.0488 | -0.665 | 0.52146 | 0.669 | -6.34 | -0.4142 | none |
| ALG5      | -0.091 | -0.1803 | -0.665 | 0.5216  | 0.669 | -6.34 | 0.22795 | none |
| IWS1      | 0.214  | 0.3951  | 0.6648 | 0.52173 | 0.669 | -6.34 | 0.23733 | none |
| WASF3     | 0.051  | 0.054   | 0.6647 | 0.5218  | 0.67  | -6.34 | 0.87432 | none |
| ME3       | 0.143  | 0.1344  | 0.6645 | 0.52193 | 0.67  | -6.34 | 0.43042 | none |
| EIF3C     | 0.202  | 0.3651  | 0.6644 | 0.52201 | 0.67  | -6.34 | 0.73601 | none |
| FEZF2     | -0.048 | -0.0499 | -0.664 | 0.52201 | 0.67  | -6.34 | 0       | none |
| OR4A15    | -0.049 | -0.0493 | -0.664 | 0.52211 | 0.67  | -6.34 | 0.88916 | none |
| OAS2      | 0.126  | 0.1679  | 0.664  | 0.52225 | 0.67  | -6.34 | 0.14395 | none |
| KCNJ8     | -0.053 | -0.0504 | -0.664 | 0.52239 | 0.67  | -6.34 | 1.97179 | none |
| P2RY12    | -0.047 | -0.0256 | -0.663 | 0.5226  | 0.67  | -6.34 | 0       | none |
| HIST2H2AI | 0.088  | 0.0891  | 0.6634 | 0.5226  | 0.67  | -6.34 | -0.4419 | none |
| HDHD3     | 0.08   | 0.0446  | 0.6632 | 0.52271 | 0.67  | -6.34 | 1.17218 | none |
| CKM       | 0.048  | 0.053   | 0.6625 | 0.52315 | 0.671 | -6.34 | -0.9827 | none |
| MRPL46    | 0.072  | 0.015   | 0.6622 | 0.52331 | 0.671 | -6.34 | -0.155  | none |
| ME1       | -0.048 | -0.0423 | -0.662 | 0.52332 | 0.671 | -6.34 | 1.99806 | none |
| CLTB      | -0.051 | -0.0131 | -0.662 | 0.52333 | 0.671 | -6.34 | -0.2438 | none |
| ZNF772    | 0.089  | -0.0282 | 0.6622 | 0.52334 | 0.671 | -6.34 | -0.9777 | none |
| CST11     | -0.065 | -0.0869 | -0.662 | 0.52335 | 0.671 | -6.34 | -0.4838 | none |
| ZADH2     | 0.117  | 0.0785  | 0.6621 | 0.52337 | 0.671 | -6.34 | 0.80753 | none |
| TMEM92    | 0.045  | 0.0502  | 0.6621 | 0.52338 | 0.671 | -6.34 | -0.4713 | none |
| LPIN2     | 0.126  | 0.1264  | 0.6621 | 0.52341 | 0.671 | -6.34 | -0.3623 | none |
| S100A1    | -0.111 | -0.0956 | -0.662 | 0.52362 | 0.671 | -6.34 | 0.68479 | none |
| CTAGE15   | 0.053  | 0.0433  | 0.6612 | 0.52396 | 0.671 | -6.34 | 0.84605 | none |
| FAM171A   | -0.048 | -0.0429 | -0.661 | 0.524   | 0.671 | -6.34 | 1.25377 | none |
| IGFN1     | 0.049  | 0.0533  | 0.661  | 0.52408 | 0.671 | -6.34 | 1.33707 | none |
| APOBEC3C  | 0.111  | 0.1428  | 0.6607 | 0.52427 | 0.671 | -6.34 | 0.12614 | none |
| IMPA1     | -0.093 | -0.1654 | -0.661 | 0.52432 | 0.671 | -6.34 | 1.03003 | none |
| B3GNT4    | 0.143  | 0.1508  | 0.6606 | 0.52432 | 0.671 | -6.34 | 0.08709 | none |
| HOMER1    | 0.183  | 0.2877  | 0.6604 | 0.52446 | 0.672 | -6.34 | 0.64332 | none |
| GSTM5     | 0.081  | 0.0727  | 0.6601 | 0.5246  | 0.672 | -6.34 | -0.6114 | none |
| CACNA1H   | -0.048 | -0.0686 | -0.66  | 0.52466 | 0.672 | -6.34 | 1.64765 | none |

|          |        |         |        |         |       |       |         |      |
|----------|--------|---------|--------|---------|-------|-------|---------|------|
| CACNG2   | 0.051  | 0.0489  | 0.6594 | 0.52503 | 0.672 | -6.34 | -0.6729 | none |
| EQTN     | 0.05   | 0.0496  | 0.6587 | 0.52548 | 0.673 | -6.34 | 1.66579 | none |
| EGFL8    | 0.085  | 0.0928  | 0.6585 | 0.5256  | 0.673 | -6.34 | 1.17298 | none |
| LY6G6C   | 0.052  | 0.0503  | 0.6584 | 0.52569 | 0.673 | -6.34 | 1.32715 | none |
| GSTA5    | 0.05   | 0.0495  | 0.6583 | 0.52574 | 0.673 | -6.34 | 0.66005 | none |
| ZBTB43   | 0.129  | 0.0898  | 0.6581 | 0.52583 | 0.673 | -6.34 | -0.5486 | none |
| PIP5K1C  | -0.138 | 0.0252  | -0.658 | 0.52583 | 0.673 | -6.34 | 0.97375 | none |
| CSF3     | -0.054 | -0.0818 | -0.658 | 0.52587 | 0.673 | -6.34 | -0.4937 | none |
| STUM     | -0.078 | -0.1105 | -0.658 | 0.5259  | 0.673 | -6.34 | 0.35201 | none |
| OR6C3    | 0.049  | 0.0495  | 0.658  | 0.5259  | 0.673 | -6.34 | 1.19688 | none |
| FAM92B   | 0.073  | 0.0391  | 0.6579 | 0.52595 | 0.673 | -6.34 | -0.739  | none |
| ALOX15   | 0.092  | 0.0458  | 0.6579 | 0.52597 | 0.673 | -6.34 | -0.3607 | none |
| AHSG     | -0.095 | -0.1199 | -0.658 | 0.52617 | 0.673 | -6.34 | 0.04013 | none |
| GPD1     | -0.09  | -0.0499 | -0.657 | 0.5263  | 0.673 | -6.34 | 1.47593 | none |
| TMPRSS9  | 0.061  | 0.0655  | 0.6572 | 0.52638 | 0.673 | -6.34 | 1.61723 | none |
| KRTAP4-8 | 0.049  | 0.0494  | 0.6572 | 0.52639 | 0.673 | -6.34 | -0.8261 | none |
| HNRNPCL3 | 0.045  | 0.0451  | 0.6572 | 0.5264  | 0.673 | -6.34 | 0       | none |
| ALLC     | 0.051  | 0.0508  | 0.657  | 0.52653 | 0.673 | -6.34 | 0.37625 | none |
| GSTA2    | -0.047 | -0.0485 | -0.657 | 0.52662 | 0.673 | -6.34 | 1.00139 | none |
| PRKAR1A  | 0.087  | 0.05    | 0.6566 | 0.5268  | 0.673 | -6.35 | 1.12652 | none |
| HSPA4    | 0.148  | 0.2372  | 0.6564 | 0.52687 | 0.673 | -6.35 | 0.87415 | none |
| CDKN1B   | -0.139 | -0.15   | -0.656 | 0.5269  | 0.673 | -6.35 | 1.58444 | none |
| ZNF503   | -0.048 | -0.0276 | -0.656 | 0.52692 | 0.673 | -6.35 | 1.95204 | none |
| NAP1L5   | 0.125  | 0.1411  | 0.6563 | 0.52696 | 0.673 | -6.35 | 1.49633 | none |
| PARD3B   | -0.112 | -0.1203 | -0.656 | 0.52706 | 0.674 | -6.35 | 0.30363 | none |
| TDRD6    | -0.051 | -0.0483 | -0.656 | 0.52725 | 0.674 | -6.35 | 0       | none |
| TXNL4B   | 0.099  | 0.0081  | 0.6555 | 0.52746 | 0.674 | -6.35 | -0.5193 | none |
| ZNF408   | 0.078  | 0.0982  | 0.6554 | 0.52754 | 0.674 | -6.35 | 0.12723 | none |
| SMARCA1  | -0.058 | -0.0627 | -0.655 | 0.52762 | 0.674 | -6.35 | 1.71717 | none |
| ABHD14B  | 0.083  | 0.0898  | 0.6552 | 0.52762 | 0.674 | -6.35 | 1.38017 | none |
| LGALS3BP | 0.067  | 0.0425  | 0.6551 | 0.5277  | 0.674 | -6.35 | 0.65375 | none |
| APEH     | 0.094  | 0.0512  | 0.6549 | 0.52782 | 0.674 | -6.35 | 0.02655 | none |
| SH3D21   | 0.133  | 0.1808  | 0.6547 | 0.52794 | 0.674 | -6.35 | -0.0672 | none |
| S100A7   | -0.056 | -0.0516 | -0.654 | 0.52808 | 0.674 | -6.35 | 2.03412 | none |
| DUOXA1   | -0.1   | -0.0675 | -0.654 | 0.52828 | 0.675 | -6.35 | 1.69342 | none |
| TRAPPC11 | -0.069 | -0.0017 | -0.654 | 0.52831 | 0.675 | -6.35 | 1.2574  | none |
| UCN2     | -0.048 | -0.0223 | -0.654 | 0.52841 | 0.675 | -6.35 | 1.10503 | none |
| CYTH3    | 0.159  | 0.0746  | 0.6538 | 0.52852 | 0.675 | -6.35 | -0.5953 | none |
| ERICH6   | -0.046 | -0.048  | -0.653 | 0.52875 | 0.675 | -6.35 | 1.39928 | none |
| FCGR2A   | -0.076 | -0.0773 | -0.653 | 0.52878 | 0.675 | -6.35 | 0.68268 | none |

|          |        |         |        |         |       |       |         |      |
|----------|--------|---------|--------|---------|-------|-------|---------|------|
| DDX21    | 0.175  | 0.2904  | 0.653  | 0.52898 | 0.675 | -6.35 | 0.25631 | none |
| STK36    | 0.089  | 0.2146  | 0.653  | 0.52899 | 0.675 | -6.35 | 0.42774 | none |
| EIF3F    | -0.069 | -0.072  | -0.653 | 0.52915 | 0.675 | -6.35 | -0.1902 | none |
| WDR12    | 0.078  | 0.0522  | 0.6527 | 0.52918 | 0.675 | -6.35 | 0.29297 | none |
| AC136612 | -0.048 | -0.0239 | -0.653 | 0.5293  | 0.675 | -6.35 | 0.89723 | none |
| ISOC2    | -0.081 | -0.0759 | -0.652 | 0.52944 | 0.676 | -6.35 | 1.55494 | none |
| DUS1L    | 0.114  | 0.1475  | 0.6522 | 0.52951 | 0.676 | -6.35 | 0.01709 | none |
| C10ORF88 | -0.088 | -0.172  | -0.652 | 0.5296  | 0.676 | -6.35 | 0.7983  | none |
| ZNF275   | -0.062 | -0.0594 | -0.652 | 0.5299  | 0.676 | -6.35 | 1.53165 | none |
| TSTD2    | 0.122  | 0.1022  | 0.6515 | 0.52993 | 0.676 | -6.35 | -0.3428 | none |
| H2AFY    | -0.059 | 0.0044  | -0.651 | 0.52993 | 0.676 | -6.35 | 0.99464 | none |
| IFNGR1   | 0.092  | 0.0152  | 0.6514 | 0.53    | 0.676 | -6.35 | 0.2976  | none |
| EXOSC4   | -0.086 | -0.0989 | -0.651 | 0.53006 | 0.676 | -6.35 | 0.1476  | none |
| TMEM244  | -0.069 | -0.1206 | -0.651 | 0.5301  | 0.676 | -6.35 | 0.29349 | none |
| PCOLCE   | 0.093  | 0.009   | 0.651  | 0.53021 | 0.676 | -6.35 | -0.7549 | none |
| NEIL2    | 0.059  | 0.0201  | 0.651  | 0.53025 | 0.676 | -6.35 | -0.3021 | none |
| FAF2     | -0.11  | -0.0778 | -0.651 | 0.5303  | 0.676 | -6.35 | 1.27355 | none |
| CLLU1OS  | -0.052 | -0.0492 | -0.651 | 0.53036 | 0.676 | -6.35 | -0.1742 | none |
| FAM166B  | 0.087  | 0.0464  | 0.6504 | 0.53062 | 0.676 | -6.35 | 0.23975 | none |
| ALG6     | 0.071  | -0.029  | 0.6501 | 0.5308  | 0.677 | -6.35 | 0.85034 | none |
| SMIM4    | 0.201  | 0.0145  | 0.65   | 0.53083 | 0.677 | -6.35 | -0.2159 | none |
| PABPC1   | 0.137  | 0.2053  | 0.6499 | 0.53092 | 0.677 | -6.35 | 0.55131 | none |
| C3ORF84  | 0.07   | 0.1024  | 0.6495 | 0.53116 | 0.677 | -6.35 | 0.91166 | none |
| ALK      | -0.074 | -0.0277 | -0.649 | 0.53116 | 0.677 | -6.35 | -0.2885 | none |
| CATSPER2 | -0.065 | -0.0281 | -0.649 | 0.53119 | 0.677 | -6.35 | 0.6138  | none |
| NCL      | 0.238  | 0.4354  | 0.6487 | 0.53163 | 0.677 | -6.35 | 0.28302 | none |
| TMEM9B   | 0.072  | -0.0346 | 0.6486 | 0.53172 | 0.677 | -6.35 | -0.0528 | none |
| B3GLCT   | 0.063  | 0.0439  | 0.6484 | 0.53181 | 0.677 | -6.35 | 0.00751 | none |
| ZDHHC4   | -0.088 | -0.1476 | -0.648 | 0.53183 | 0.677 | -6.35 | 1.29382 | none |
| RMDN2    | 0.121  | 0.1756  | 0.6481 | 0.53203 | 0.678 | -6.35 | 0.75313 | none |
| ACTB     | -0.076 | -0.0394 | -0.648 | 0.53207 | 0.678 | -6.35 | 1.43499 | none |
| MYOM2    | -0.111 | -0.0737 | -0.648 | 0.53231 | 0.678 | -6.35 | 1.52325 | none |
| SERTAD4  | -0.049 | -0.0488 | -0.647 | 0.5325  | 0.678 | -6.35 | 1.19237 | none |
| ANKEF1   | 0.072  | 0.0588  | 0.6459 | 0.5334  | 0.679 | -6.35 | -0.262  | none |
| C19ORF33 | 0.106  | 0.1123  | 0.6459 | 0.53341 | 0.679 | -6.35 | 1.61806 | none |
| ADH5     | -0.075 | -0.1447 | -0.646 | 0.53345 | 0.679 | -6.35 | -0.4052 | none |
| PDZD3    | -0.045 | -0.0251 | -0.646 | 0.53355 | 0.679 | -6.35 | 0.35106 | none |
| CSTF2    | 0.059  | 0.0862  | 0.6455 | 0.53364 | 0.679 | -6.35 | 0.05695 | none |
| LYPLA2   | -0.08  | -0.0704 | -0.645 | 0.5337  | 0.679 | -6.35 | 0.692   | none |
| TTC29    | -0.047 | -0.0474 | -0.645 | 0.53375 | 0.679 | -6.35 | -0.6726 | none |

|          |        |         |        |         |       |       |         |            |
|----------|--------|---------|--------|---------|-------|-------|---------|------------|
| USP17L17 | 0.048  | 0.0481  | 0.645  | 0.53393 | 0.679 | -6.35 | -0.6841 | none       |
| OR2T8    | 0.047  | 0.0481  | 0.645  | 0.53397 | 0.679 | -6.35 | 0       | none       |
| MAP3K1   | 0.136  | 0.1736  | 0.6449 | 0.53399 | 0.679 | -6.35 | 0.67607 | none       |
| SLC9A3   | 0.062  | 0.043   | 0.6445 | 0.53423 | 0.68  | -6.35 | 1.79449 | none       |
| LRRC4B   | -0.062 | -0.0371 | -0.644 | 0.53427 | 0.68  | -6.35 | 1.49857 | none       |
| CLNS1A   | -0.065 | -0.1275 | -0.644 | 0.53431 | 0.68  | -6.35 | 1.25136 | none       |
| SALL4    | 0.085  | 0.0108  | 0.6443 | 0.53442 | 0.68  | -6.35 | 0.64706 | none       |
| MED30    | -0.084 | -0.1408 | -0.644 | 0.53446 | 0.68  | -6.35 | 0.4983  | none       |
| GJB2     | -0.108 | -0.1389 | -0.644 | 0.53448 | 0.68  | -6.35 | 0.41389 | none       |
| MZT2B    | -0.114 | -0.1052 | -0.644 | 0.5347  | 0.68  | -6.35 | 0.03078 | none       |
| HPDL     | -0.086 | -0.019  | -0.644 | 0.53473 | 0.68  | -6.35 | 2.25695 | AA-related |
| PDSS1    | -0.058 | 0.0044  | -0.644 | 0.5348  | 0.68  | -6.35 | 1.42631 | none       |
| TUBA4A   | -0.067 | -0.1484 | -0.643 | 0.53496 | 0.68  | -6.35 | 0.99355 | none       |
| DDN      | 0.052  | 0.0837  | 0.6433 | 0.535   | 0.68  | -6.35 | 0.39219 | none       |
| SPACA5   | -0.093 | -0.09   | -0.643 | 0.53501 | 0.68  | -6.35 | 0.08374 | none       |
| ARL13A   | -0.11  | -0.0798 | -0.643 | 0.53503 | 0.68  | -6.35 | -0.1143 | none       |
| NUFIP1   | 0.084  | 0.1573  | 0.6429 | 0.53526 | 0.68  | -6.35 | 0.26209 | none       |
| TOX      | 0.064  | 0.0717  | 0.6428 | 0.53531 | 0.68  | -6.35 | -0.3856 | none       |
| HBZ      | 0.065  | 0.0579  | 0.6424 | 0.5356  | 0.681 | -6.35 | 0.74388 | none       |
| C2ORF16  | -0.047 | -0.0619 | -0.642 | 0.53575 | 0.681 | -6.35 | 1.03291 | none       |
| HGFAC    | -0.069 | -0.0296 | -0.642 | 0.53595 | 0.681 | -6.36 | 1.03296 | none       |
| AC105052 | 0.07   | 0.0384  | 0.6416 | 0.53607 | 0.681 | -6.36 | 0.03741 | none       |
| CYP2A7   | -0.047 | -0.047  | -0.642 | 0.53611 | 0.681 | -6.36 | 0.7865  | none       |
| GFI1     | 0.104  | 0.1733  | 0.6415 | 0.53611 | 0.681 | -6.36 | -0.6366 | none       |
| CDX2     | -0.044 | -0.0336 | -0.641 | 0.5362  | 0.681 | -6.36 | 0.53669 | none       |
| WDSUB1   | 0.072  | -0.0094 | 0.6413 | 0.53626 | 0.681 | -6.36 | 1.00559 | none       |
| NFATC4   | -0.041 | -0.0183 | -0.641 | 0.53634 | 0.681 | -6.36 | 0.22191 | none       |
| PRSS16   | 0.134  | 0.0459  | 0.641  | 0.53645 | 0.681 | -6.36 | 0.10156 | none       |
| LIFR     | 0.181  | 0.1486  | 0.641  | 0.53646 | 0.681 | -6.36 | -0.127  | none       |
| COA1     | 0.103  | -0.0308 | 0.6409 | 0.5365  | 0.681 | -6.36 | 0.43828 | none       |
| AC004556 | -0.071 | -0.1361 | -0.641 | 0.53662 | 0.681 | -6.36 | 0.77453 | none       |
| CWC15    | 0.067  | 0.0528  | 0.6404 | 0.53682 | 0.682 | -6.36 | 0.42536 | none       |
| PDCL     | 0.084  | 0.0595  | 0.6403 | 0.53686 | 0.682 | -6.36 | 0.3539  | none       |
| NCK1     | -0.073 | -0.1419 | -0.64  | 0.53701 | 0.682 | -6.36 | 1.24065 | none       |
| SLC35D1  | -0.055 | -0.0819 | -0.64  | 0.53707 | 0.682 | -6.36 | 1.15062 | none       |
| CDC42EP4 | 0.082  | 0.1187  | 0.64   | 0.53708 | 0.682 | -6.36 | 1.56669 | none       |
| OXLD1    | 0.083  | 0.0479  | 0.64   | 0.53708 | 0.682 | -6.36 | -0.0146 | none       |
| SIRT1    | -0.121 | -0.0998 | -0.64  | 0.53732 | 0.682 | -6.36 | 1.13575 | none       |
| CUL2     | 0.163  | 0.2176  | 0.6393 | 0.53749 | 0.682 | -6.36 | 0.41828 | none       |
| SERPINE3 | 0.126  | 0.1396  | 0.6393 | 0.53749 | 0.682 | -6.36 | 1.43981 | none       |



|          |        |         |        |         |       |       |         |      |
|----------|--------|---------|--------|---------|-------|-------|---------|------|
| PAIP2    | -0.07  | -0.1588 | -0.639 | 0.53753 | 0.682 | -6.36 | -0.2391 | none |
| PHF23    | -0.091 | -0.043  | -0.639 | 0.53768 | 0.682 | -6.36 | 0.94686 | none |
| AFTPH    | 0.075  | 0.1109  | 0.6389 | 0.53774 | 0.682 | -6.36 | 1.45093 | none |
| MFAP4    | 0.05   | 0.0524  | 0.6388 | 0.5378  | 0.682 | -6.36 | 1.20882 | none |
| PNO1     | 0.087  | 0.0646  | 0.6387 | 0.53788 | 0.682 | -6.36 | 0.15573 | none |
| NCAPH    | 0.12   | 0.2063  | 0.6387 | 0.53789 | 0.682 | -6.36 | 0.75843 | none |
| KCMF1    | 0.073  | -0.0474 | 0.6384 | 0.53803 | 0.682 | -6.36 | 0.31155 | none |
| TMEM179  | 0.055  | 0.066   | 0.6382 | 0.53817 | 0.682 | -6.36 | 0.5441  | none |
| FGB      | -0.053 | -0.0673 | -0.638 | 0.53818 | 0.682 | -6.36 | 1.29809 | none |
| NDUFV1   | 0.077  | 0.0635  | 0.6382 | 0.53819 | 0.682 | -6.36 | 0.7338  | none |
| PCDH12   | -0.057 | -0.0451 | -0.638 | 0.53823 | 0.682 | -6.36 | -0.6937 | none |
| AFAP1L2  | -0.098 | -0.0489 | -0.638 | 0.53824 | 0.682 | -6.36 | 0.0858  | none |
| CDH2     | 0.057  | 0.0548  | 0.6379 | 0.53839 | 0.682 | -6.36 | -0.7311 | none |
| TMEM140  | 0.073  | 0.0531  | 0.6377 | 0.53847 | 0.682 | -6.36 | -0.0044 | none |
| ALG1L2   | -0.176 | -0.0986 | -0.637 | 0.53891 | 0.683 | -6.36 | 0.1229  | none |
| SIGIRR   | -0.137 | -0.2227 | -0.637 | 0.53896 | 0.683 | -6.36 | 0.44521 | none |
| LZTS2    | 0.05   | 0.0281  | 0.6369 | 0.53897 | 0.683 | -6.36 | 0.98908 | none |
| ASIC3    | 0.119  | 0.0621  | 0.6369 | 0.53901 | 0.683 | -6.36 | 1.57364 | none |
| ZNF107   | 0.144  | 0.2703  | 0.6367 | 0.53915 | 0.683 | -6.36 | 0.615   | none |
| USP17L2  | 0.044  | 0.0494  | 0.6364 | 0.53928 | 0.683 | -6.36 | 1.70709 | none |
| SLC5A3   | -0.06  | -0.0807 | -0.636 | 0.53933 | 0.683 | -6.36 | 1.01039 | none |
| INHBC    | -0.044 | -0.0288 | -0.636 | 0.53935 | 0.683 | -6.36 | 0       | none |
| METAP1D  | 0.139  | 0.0988  | 0.6363 | 0.53935 | 0.683 | -6.36 | 0.07416 | none |
| LTA4H    | -0.054 | -0.0814 | -0.636 | 0.53958 | 0.683 | -6.36 | 1.60755 | none |
| GHDC     | 0.102  | 0.1336  | 0.6356 | 0.53979 | 0.684 | -6.36 | 1.66322 | none |
| TMEM204  | -0.047 | -0.0649 | -0.635 | 0.54004 | 0.684 | -6.36 | 0.39474 | none |
| SMO      | 0.07   | 0.065   | 0.6351 | 0.54014 | 0.684 | -6.36 | -0.4911 | none |
| PTX4     | 0.07   | 0.0521  | 0.6351 | 0.54014 | 0.684 | -6.36 | 0.941   | none |
| PUM2     | 0.117  | 0.1007  | 0.6348 | 0.54033 | 0.684 | -6.36 | -0.5692 | none |
| CATSPER3 | -0.078 | -0.0501 | -0.634 | 0.5408  | 0.685 | -6.36 | -0.0028 | none |
| GALNTL5  | -0.078 | -0.0236 | -0.634 | 0.54084 | 0.685 | -6.36 | 1.67783 | none |
| TMEM69   | -0.09  | -0.1715 | -0.634 | 0.54087 | 0.685 | -6.36 | 1.74339 | none |
| CACNA2D4 | -0.088 | -0.1262 | -0.634 | 0.54089 | 0.685 | -6.36 | 0.09197 | none |
| CTSG     | -0.046 | -0.0462 | -0.634 | 0.541   | 0.685 | -6.36 | -0.0349 | none |
| GGACT    | 0.148  | 0.1497  | 0.6336 | 0.54104 | 0.685 | -6.36 | 0.58126 | none |
| OTULIN   | 0.091  | #####   | 0.6336 | 0.54107 | 0.685 | -6.36 | -0.5154 | none |
| CYP4F3   | 0.18   | 0.0255  | 0.6335 | 0.54114 | 0.685 | -6.36 | -1.1849 | none |
| FBXO16   | -0.23  | -0.1152 | -0.633 | 0.54124 | 0.685 | -6.36 | 1.52288 | none |
| RBFOX2   | 0.078  | 0.1375  | 0.6331 | 0.54135 | 0.685 | -6.36 | 0.04169 | none |
| RASL12   | 0.054  | 0.0747  | 0.633  | 0.54142 | 0.685 | -6.36 | 1.47012 | none |

|          |        |         |        |         |       |       |         |      |
|----------|--------|---------|--------|---------|-------|-------|---------|------|
| ZNF511   | -0.104 | -0.1293 | -0.633 | 0.54152 | 0.685 | -6.36 | 1.33047 | none |
| ALB      | -0.169 | -0.2256 | -0.633 | 0.54154 | 0.685 | -6.36 | 0.39065 | none |
| LYSMD4   | 0.118  | 0.179   | 0.6328 | 0.54158 | 0.685 | -6.36 | 0.31466 | none |
| ERCC3    | 0.092  | 0.1856  | 0.6327 | 0.54161 | 0.685 | -6.36 | 0.69883 | none |
| NFIB     | 0.109  | 0.1291  | 0.6325 | 0.54177 | 0.685 | -6.36 | -0.518  | none |
| FAM102A  | 0.076  | 0.0531  | 0.6323 | 0.54189 | 0.685 | -6.36 | -0.5217 | none |
| CHTOP    | 0.049  | 0.0734  | 0.6323 | 0.54189 | 0.685 | -6.36 | -0.5323 | none |
| HSD17B6  | -0.217 | -0.2007 | -0.632 | 0.5421  | 0.685 | -6.36 | 0.45147 | none |
| ADCYAP1F | 0.051  | 0.0506  | 0.6319 | 0.54215 | 0.685 | -6.36 | 0.26365 | none |
| OR6B3    | -0.046 | -0.046  | -0.632 | 0.54216 | 0.685 | -6.36 | -0.4862 | none |
| N4BP3    | 0.05   | 0.0611  | 0.6318 | 0.54218 | 0.685 | -6.36 | 0.17853 | none |
| KAT14    | 0.058  | 0.0359  | 0.6318 | 0.5422  | 0.685 | -6.36 | -0.6097 | none |
| CDYL2    | 0.074  | 0.0842  | 0.6318 | 0.5422  | 0.685 | -6.36 | 1.29884 | none |
| HTR3C    | 0.049  | 0.049   | 0.6318 | 0.54222 | 0.685 | -6.36 | 0.20764 | none |
| CASP3    | -0.077 | -0.1208 | -0.632 | 0.54222 | 0.685 | -6.36 | 1.43466 | none |
| H1FOO    | 0.047  | 0.0467  | 0.6317 | 0.54227 | 0.685 | -6.36 | -0.5168 | none |
| PPM1M    | -0.061 | -0.0228 | -0.632 | 0.54227 | 0.685 | -6.36 | 1.34922 | none |
| CLCF1    | -0.078 | -0.0311 | -0.632 | 0.54231 | 0.685 | -6.36 | 1.13958 | none |
| TRIM64C  | 0.047  | 0.0467  | 0.6314 | 0.54242 | 0.685 | -6.36 | 0       | none |
| FXN      | -0.073 | -0.0752 | -0.631 | 0.5427  | 0.685 | -6.36 | 0.62712 | none |
| SDCBP2   | 0.08   | 0.1485  | 0.631  | 0.54272 | 0.685 | -6.36 | 0.67644 | none |
| JAKMIP3  | 0.044  | 0.0368  | 0.6307 | 0.54286 | 0.686 | -6.36 | -0.7618 | none |
| MVB12B   | 0.123  | 0.0046  | 0.6304 | 0.54305 | 0.686 | -6.36 | -0.8828 | none |
| SLC17A4  | -0.043 | -0.0257 | -0.63  | 0.54306 | 0.686 | -6.36 | 0       | none |
| FP325317 | 0.047  | 0.0466  | 0.6301 | 0.54324 | 0.686 | -6.36 | 0.16654 | none |
| VPS37D   | 0.048  | 0.0549  | 0.6295 | 0.54362 | 0.686 | -6.36 | 0.02191 | none |
| RXFP1    | 0.095  | 0.1964  | 0.6291 | 0.54385 | 0.687 | -6.36 | 1.02363 | none |
| CDKL2    | 0.044  | 0.0614  | 0.6291 | 0.54386 | 0.687 | -6.36 | 1.31296 | none |
| WDR64    | 0.066  | 0.0649  | 0.629  | 0.54391 | 0.687 | -6.36 | -0.8214 | none |
| TSPY10   | 0.046  | 0.0464  | 0.6286 | 0.54422 | 0.687 | -6.36 | 1.39467 | none |
| PKIG     | 0.058  | 0.0485  | 0.6285 | 0.54424 | 0.687 | -6.36 | 0.48469 | none |
| USP17L22 | 0.147  | 0.1427  | 0.6285 | 0.54426 | 0.687 | -6.36 | 1.45888 | none |
| TRIM26   | 0.094  | 0.1584  | 0.6281 | 0.54454 | 0.687 | -6.36 | 1.23047 | none |
| ABHD4    | 0.105  | 0.0375  | 0.6279 | 0.54464 | 0.687 | -6.36 | -1.1452 | none |
| PAPSS1   | -0.055 | -0.093  | -0.627 | 0.54504 | 0.688 | -6.36 | 1.07152 | none |
| GLYAT    | -0.057 | -0.0957 | -0.627 | 0.54516 | 0.688 | -6.36 | -0.0577 | none |
| LRRC38   | -0.042 | -0.025  | -0.627 | 0.54516 | 0.688 | -6.36 | 0       | none |
| SLC10A3  | 0.079  | 0.0684  | 0.6269 | 0.54526 | 0.688 | -6.36 | 0.37208 | none |
| MAPK14   | 0.069  | 0.0493  | 0.6266 | 0.54543 | 0.688 | -6.37 | 0.76575 | none |
| SNX2     | -0.07  | -0.0429 | -0.627 | 0.5455  | 0.688 | -6.37 | 1.66933 | none |

|          |        |         |        |         |       |       |         |      |
|----------|--------|---------|--------|---------|-------|-------|---------|------|
| CCDC73   | -0.043 | -0.0351 | -0.626 | 0.54574 | 0.688 | -6.37 | 0.53341 | none |
| 6-Sep    | 0.136  | 0.1979  | 0.6258 | 0.54593 | 0.688 | -6.37 | 0.54814 | none |
| BMT2     | 0.138  | 0.013   | 0.6258 | 0.54598 | 0.688 | -6.37 | -0.3993 | none |
| THSD7A   | 0.07   | 0.0225  | 0.6255 | 0.54615 | 0.689 | -6.37 | 0.97214 | none |
| SAPCD2   | 0.091  | 0.168   | 0.6252 | 0.54634 | 0.689 | -6.37 | -0.1265 | none |
| MMP23B   | -0.075 | -0.002  | -0.625 | 0.54644 | 0.689 | -6.37 | 1.68567 | none |
| IER3IP1  | 0.112  | -0.0421 | 0.625  | 0.54644 | 0.689 | -6.37 | 0.08571 | none |
| GPHA2    | 0.064  | 0.0914  | 0.625  | 0.54646 | 0.689 | -6.37 | 1.63851 | none |
| MARCKS   | 0.045  | 0.0454  | 0.6249 | 0.54653 | 0.689 | -6.37 | -0.8245 | none |
| MED28    | -0.11  | -0.1836 | -0.625 | 0.54666 | 0.689 | -6.37 | 0.40964 | none |
| BUB3     | -0.056 | -0.0599 | -0.624 | 0.54678 | 0.689 | -6.37 | -0.3245 | none |
| RAB37    | -0.123 | -0.175  | -0.624 | 0.5469  | 0.689 | -6.37 | 1.00927 | none |
| ASB7     | 0.067  | 0.0592  | 0.6243 | 0.54693 | 0.689 | -6.37 | 0.55624 | none |
| ETFA     | -0.059 | -0.1111 | -0.624 | 0.54697 | 0.689 | -6.37 | -0.4527 | none |
| CARTPT   | 0.046  | 0.0459  | 0.6241 | 0.54703 | 0.689 | -6.37 | -0.4725 | none |
| GPR137B  | -0.141 | -0.1912 | -0.624 | 0.54726 | 0.689 | -6.37 | 0.39137 | none |
| SLCO1C1  | 0.109  | 0.1297  | 0.6231 | 0.54763 | 0.69  | -6.37 | 1.36334 | none |
| SHPRH    | 0.135  | 0.1734  | 0.623  | 0.54773 | 0.69  | -6.37 | 0.46318 | none |
| HERC5    | 0.121  | 0.1473  | 0.6229 | 0.54778 | 0.69  | -6.37 | 1.28389 | none |
| CPA2     | -0.046 | -0.013  | -0.623 | 0.54786 | 0.69  | -6.37 | 0.9513  | none |
| SLC25A20 | 0.075  | 0.0663  | 0.6226 | 0.54797 | 0.69  | -6.37 | 0.01096 | none |
| GPSM3    | -0.121 | -0.142  | -0.622 | 0.54815 | 0.69  | -6.37 | 0.62323 | none |
| ROPN1B   | 0.053  | 0.0632  | 0.6221 | 0.54826 | 0.69  | -6.37 | -0.8684 | none |
| NUF2     | 0.118  | 0.1439  | 0.6221 | 0.54829 | 0.69  | -6.37 | 0.78169 | none |
| ZNF433   | 0.13   | 0.1569  | 0.6221 | 0.54829 | 0.69  | -6.37 | -0.0324 | none |
| ALKBH6   | 0.142  | 0.1645  | 0.622  | 0.54837 | 0.69  | -6.37 | 1.22017 | none |
| LANCL1   | 0.113  | #####   | 0.6219 | 0.54839 | 0.69  | -6.37 | -0.2334 | none |
| MGARP    | -0.053 | -0.0329 | -0.622 | 0.54847 | 0.69  | -6.37 | -0.3672 | none |
| RUNX3    | 0.104  | 0.1901  | 0.6216 | 0.54858 | 0.69  | -6.37 | 0.00353 | none |
| PRPS2    | -0.085 | -0.0879 | -0.622 | 0.54859 | 0.69  | -6.37 | 1.60404 | none |
| CDH26    | 0.119  | 0.1587  | 0.6213 | 0.54877 | 0.691 | -6.37 | 0.37986 | none |
| DTL      | 0.064  | 0.0864  | 0.6209 | 0.54905 | 0.691 | -6.37 | 1.16982 | none |
| ALKBH3   | -0.1   | -0.1435 | -0.621 | 0.54908 | 0.691 | -6.37 | -0.2801 | none |
| C22ORF23 | -0.085 | -0.0339 | -0.621 | 0.54912 | 0.691 | -6.37 | 1.06407 | none |
| DMTN     | 0.096  | 0.0991  | 0.6203 | 0.54943 | 0.691 | -6.37 | 0.31726 | none |
| S100A13  | -0.176 | -0.1246 | -0.62  | 0.54954 | 0.691 | -6.37 | 1.85347 | none |
| E2F1     | -0.069 | -0.0173 | -0.62  | 0.54961 | 0.691 | -6.37 | 1.48286 | none |
| FAM129B  | -0.159 | -0.0672 | -0.62  | 0.54965 | 0.691 | -6.37 | -0.1584 | none |
| FAM110C  | 0.092  | 0.0928  | 0.6197 | 0.54977 | 0.691 | -6.37 | 1.82538 | none |
| HOXA1    | -0.053 | -0.012  | -0.619 | 0.55008 | 0.692 | -6.37 | 1.57918 | none |

|          |        |         |        |         |       |       |         |            |
|----------|--------|---------|--------|---------|-------|-------|---------|------------|
| ZG16B    | -0.098 | -0.0868 | -0.619 | 0.5505  | 0.692 | -6.37 | 1.3793  | none       |
| TARS     | -0.086 | -0.0126 | -0.618 | 0.5506  | 0.692 | -6.37 | 1.72907 | none       |
| NACAD    | -0.043 | -0.0352 | -0.618 | 0.55065 | 0.692 | -6.37 | 0       | none       |
| BBS9     | -0.102 | -0.0874 | -0.618 | 0.55068 | 0.692 | -6.37 | 0.47234 | none       |
| OSGIN2   | -0.102 | -0.1405 | -0.618 | 0.55074 | 0.692 | -6.37 | 0.7849  | none       |
| NKX6-1   | 0.045  | 0.0263  | 0.618  | 0.55087 | 0.692 | -6.37 | 1.54885 | none       |
| VTI1B    | 0.061  | 0.0454  | 0.618  | 0.55088 | 0.692 | -6.37 | -0.7703 | none       |
| THRB     | 0.054  | 0.0542  | 0.6179 | 0.55091 | 0.692 | -6.37 | 0.80584 | none       |
| SLC25A29 | -0.124 | -0.1954 | -0.618 | 0.55116 | 0.693 | -6.37 | -0.6686 | none       |
| PNMA6A   | -0.054 | -0.0231 | -0.617 | 0.55124 | 0.693 | -6.37 | 1.2961  | none       |
| SLC44A3  | 0.064  | 0.0576  | 0.6174 | 0.55127 | 0.693 | -6.37 | 1.13399 | none       |
| OR5M11   | -0.045 | -0.0446 | -0.617 | 0.5513  | 0.693 | -6.37 | 1.50474 | none       |
| PAPSS2   | -0.057 | -0.0056 | -0.617 | 0.55131 | 0.693 | -6.37 | 1.08437 | none       |
| TRIM60   | 0.116  | 0.066   | 0.6172 | 0.55138 | 0.693 | -6.37 | -0.761  | none       |
| EPSTI1   | 0.097  | 0.106   | 0.6171 | 0.55142 | 0.693 | -6.37 | 0.34181 | none       |
| MRPS26   | -0.052 | -0.0408 | -0.617 | 0.55143 | 0.693 | -6.37 | 1.03455 | none       |
| OR2AE1   | 0.047  | 0.0455  | 0.617  | 0.55149 | 0.693 | -6.37 | -0.1632 | none       |
| IL17C    | -0.077 | -0.0497 | -0.617 | 0.55156 | 0.693 | -6.37 | 1.15185 | none       |
| WLS      | -0.108 | -0.1342 | -0.617 | 0.55162 | 0.693 | -6.37 | 0.36459 | none       |
| C5ORF22  | 0.092  | 0.0169  | 0.6168 | 0.55166 | 0.693 | -6.37 | 0.20875 | none       |
| LGALS9B  | -0.096 | -0.036  | -0.617 | 0.55179 | 0.693 | -6.37 | 1.18472 | none       |
| SMCP     | 0.045  | 0.0451  | 0.6163 | 0.55194 | 0.693 | -6.37 | -0.846  | none       |
| GOLGA8G  | 0.042  | 0.0478  | 0.6162 | 0.55202 | 0.693 | -6.37 | -0.3005 | none       |
| APOA1    | -0.073 | -0.0656 | -0.616 | 0.55206 | 0.693 | -6.37 | 0.40063 | none       |
| PSG8     | -0.073 | -0.073  | -0.616 | 0.5523  | 0.693 | -6.37 | 2.16217 | AA-related |
| OR6N2    | 0.042  | 0.0423  | 0.6155 | 0.55243 | 0.693 | -6.37 | 1.52134 | none       |
| CBLB     | 0.098  | 0.1262  | 0.6155 | 0.55248 | 0.693 | -6.37 | 0.57386 | none       |
| SSB      | 0.186  | 0.3121  | 0.6152 | 0.55262 | 0.693 | -6.37 | -0.2298 | none       |
| CRYBA4   | -0.068 | -0.0439 | -0.615 | 0.5527  | 0.694 | -6.37 | 1.35065 | none       |
| GRM8     | -0.051 | -0.0511 | -0.615 | 0.55299 | 0.694 | -6.37 | 1.06361 | none       |
| SLC16A1  | 0.063  | 0.0468  | 0.6145 | 0.55306 | 0.694 | -6.37 | 0.02435 | none       |
| PSD2     | -0.042 | -0.0403 | -0.614 | 0.55311 | 0.694 | -6.37 | 0       | none       |
| C22ORF15 | 0.06   | 0.0558  | 0.6144 | 0.55316 | 0.694 | -6.37 | 0.44846 | none       |
| NLGN2    | -0.054 | -0.0068 | -0.614 | 0.55348 | 0.694 | -6.37 | 0.64123 | none       |
| IGF2     | -0.096 | -0.1086 | -0.614 | 0.55349 | 0.694 | -6.37 | -0.3064 | none       |
| DLK1     | -0.07  | -0.0718 | -0.614 | 0.55367 | 0.694 | -6.37 | 1.28421 | none       |
| OR5T2    | -0.042 | -0.0161 | -0.614 | 0.55372 | 0.694 | -6.37 | 0.74998 | none       |
| AC136352 | 0.045  | 0.0448  | 0.6135 | 0.55373 | 0.694 | -6.37 | 0       | none       |
| MANEAL   | 0.062  | 0.0675  | 0.6135 | 0.55373 | 0.694 | -6.37 | 0.66639 | none       |
| DOLK     | 0.084  | 0.0136  | 0.6131 | 0.55398 | 0.695 | -6.37 | -0.4038 | none       |

|          |        |         |        |         |       |       |         |      |
|----------|--------|---------|--------|---------|-------|-------|---------|------|
| TESK1    | 0.077  | 0.1304  | 0.6131 | 0.55399 | 0.695 | -6.37 | -0.5488 | none |
| SRM      | 0.077  | 0.0616  | 0.6124 | 0.55441 | 0.695 | -6.37 | -0.7025 | none |
| TERT     | -0.142 | -0.094  | -0.612 | 0.55462 | 0.695 | -6.37 | -0.107  | none |
| AADA4    | 0.045  | 0.0447  | 0.6119 | 0.55471 | 0.695 | -6.37 | 0       | none |
| HYAL2    | 0.111  | 0.122   | 0.6115 | 0.55498 | 0.696 | -6.37 | 0.05704 | none |
| TET3     | 0.107  | 0.2013  | 0.6115 | 0.555   | 0.696 | -6.37 | 1.32618 | none |
| IKZF5    | 0.155  | 0.1762  | 0.6114 | 0.55506 | 0.696 | -6.37 | 0.6185  | none |
| SIL1     | -0.062 | 0.0044  | -0.611 | 0.55528 | 0.696 | -6.38 | 0.64842 | none |
| CTBS     | -0.075 | -0.1014 | -0.611 | 0.55538 | 0.696 | -6.38 | 0.82354 | none |
| MFSD1    | 0.071  | -0.0014 | 0.6108 | 0.55543 | 0.696 | -6.38 | 0.60715 | none |
| BCL6B    | 0.067  | 0.0983  | 0.6107 | 0.55549 | 0.696 | -6.38 | 1.39544 | none |
| FAM111B  | 0.248  | 0.3706  | 0.6105 | 0.55561 | 0.696 | -6.38 | -0.0785 | none |
| SMIM6    | -0.047 | -0.0376 | -0.61  | 0.55614 | 0.697 | -6.38 | 0.71349 | none |
| ACMSD    | 0.107  | 0.074   | 0.6095 | 0.55624 | 0.697 | -6.38 | -0.6649 | none |
| IFNE     | 0.044  | 0.0444  | 0.6094 | 0.55631 | 0.697 | -6.38 | 0       | none |
| B4GALNT3 | 0.075  | 0.1697  | 0.6092 | 0.55646 | 0.697 | -6.38 | -0.0092 | none |
| ARMCX5   | 0.11   | 0.0626  | 0.6092 | 0.55647 | 0.697 | -6.38 | -0.2119 | none |
| KCNH3    | -0.095 | -0.0158 | -0.609 | 0.5567  | 0.697 | -6.38 | 1.1753  | none |
| CDH16    | -0.069 | -0.061  | -0.609 | 0.55676 | 0.697 | -6.38 | 1.9259  | none |
| TAOK2    | 0.14   | 0.2685  | 0.6082 | 0.55706 | 0.697 | -6.38 | 0.25363 | none |
| C1ORF159 | 0.066  | 0.1009  | 0.6082 | 0.55708 | 0.697 | -6.38 | 0.89495 | none |
| HRASLS5  | -0.047 | -0.0591 | -0.608 | 0.55712 | 0.697 | -6.38 | 1.53994 | none |
| ZNF582   | 0.102  | 0.2125  | 0.6081 | 0.55716 | 0.697 | -6.38 | 1.56403 | none |
| MGAT4D   | 0.078  | 0.0782  | 0.6078 | 0.55737 | 0.697 | -6.38 | 1.05585 | none |
| SAR1A    | 0.081  | 0.003   | 0.6078 | 0.55737 | 0.697 | -6.38 | -0.2911 | none |
| HSD3B2   | 0.044  | 0.0443  | 0.6077 | 0.55739 | 0.697 | -6.38 | 1.68353 | none |
| TRMT13   | 0.101  | 0.0572  | 0.6077 | 0.55742 | 0.697 | -6.38 | 1.03839 | none |
| SLC27A4  | -0.053 | -0.0116 | -0.608 | 0.55743 | 0.697 | -6.38 | 1.42098 | none |
| CGREF1   | 0.092  | 0.2165  | 0.6069 | 0.55794 | 0.698 | -6.38 | 0.43025 | none |
| PRSS55   | 0.05   | 0.036   | 0.6064 | 0.55825 | 0.698 | -6.38 | 0.40683 | none |
| IFNA8    | -0.043 | -0.0435 | -0.606 | 0.55834 | 0.698 | -6.38 | 0       | none |
| INTS12   | -0.076 | -0.0042 | -0.606 | 0.55843 | 0.698 | -6.38 | 0.74468 | none |
| BCL9     | 0.188  | 0.3614  | 0.6059 | 0.55856 | 0.699 | -6.38 | 0.21411 | none |
| CIDEA    | 0.047  | 0.0465  | 0.6055 | 0.5588  | 0.699 | -6.38 | 0.78245 | none |
| ZNHIT2   | -0.069 | -0.0509 | -0.605 | 0.55903 | 0.699 | -6.38 | 0.11418 | none |
| ANP32A   | -0.088 | -0.0085 | -0.605 | 0.55921 | 0.699 | -6.38 | 0.93063 | none |
| FTCD     | -0.07  | -0.0695 | -0.605 | 0.55923 | 0.699 | -6.38 | 1.92315 | none |
| SHB      | 0.044  | 0.058   | 0.6048 | 0.55928 | 0.699 | -6.38 | -0.1555 | none |
| METTL14  | 0.141  | 0.1353  | 0.6042 | 0.55962 | 0.7   | -6.38 | -0.0199 | none |
| DHRS13   | -0.057 | -0.0405 | -0.604 | 0.55968 | 0.7   | -6.38 | 1.20255 | none |

|          |        |         |        |         |       |       |         |      |
|----------|--------|---------|--------|---------|-------|-------|---------|------|
| IL13RA2  | -0.043 | -0.0433 | -0.604 | 0.55969 | 0.7   | -6.38 | 1.51533 | none |
| TRIM15   | -0.043 | -0.0341 | -0.604 | 0.55976 | 0.7   | -6.38 | 0.35918 | none |
| IL2RB    | 0.095  | 0.1388  | 0.604  | 0.55977 | 0.7   | -6.38 | 0.70827 | none |
| MXD3     | 0.072  | 0.0385  | 0.6037 | 0.55993 | 0.7   | -6.38 | 0.6562  | none |
| S100A8   | -0.053 | -0.0706 | -0.604 | 0.55996 | 0.7   | -6.38 | 0.64998 | none |
| CRYAA    | 0.044  | 0.0439  | 0.6035 | 0.56006 | 0.7   | -6.38 | 0       | none |
| GOLGA6D  | -0.043 | -0.0432 | -0.603 | 0.56027 | 0.7   | -6.38 | 1.22662 | none |
| CA2      | -0.086 | 0.0283  | -0.603 | 0.56067 | 0.7   | -6.38 | 1.58245 | none |
| ARID3C   | 0.042  | 0.0313  | 0.6025 | 0.56075 | 0.7   | -6.38 | 0       | none |
| TIGD6    | -0.074 | -0.0309 | -0.602 | 0.56081 | 0.701 | -6.38 | 0.46811 | none |
| HAS1     | -0.051 | -0.0523 | -0.602 | 0.56088 | 0.701 | -6.38 | -0.0212 | none |
| GLUL     | -0.111 | -0.1273 | -0.602 | 0.56099 | 0.701 | -6.38 | 1.46624 | none |
| CHCHD3   | -0.077 | -0.0308 | -0.602 | 0.56103 | 0.701 | -6.38 | 1.61549 | none |
| ACOT8    | -0.074 | -0.1176 | -0.601 | 0.56137 | 0.701 | -6.38 | 0.71967 | none |
| DUSP14   | 0.258  | 0.2485  | 0.6013 | 0.56151 | 0.701 | -6.38 | 0.10592 | none |
| GAB2     | 0.143  | 0.1617  | 0.6012 | 0.56155 | 0.701 | -6.38 | 0.35689 | none |
| CD8B     | -0.074 | -0.0127 | -0.601 | 0.56167 | 0.701 | -6.38 | 0.29113 | none |
| FGF4     | -0.042 | -0.0422 | -0.601 | 0.56171 | 0.701 | -6.38 | 1.1314  | none |
| TEX101   | 0.08   | 0.0619  | 0.6009 | 0.56176 | 0.701 | -6.38 | 0.85941 | none |
| B3GAT2   | 0.041  | 0.0142  | 0.6008 | 0.56179 | 0.701 | -6.38 | 0.54834 | none |
| DAB2     | -0.118 | -0.1048 | -0.601 | 0.5618  | 0.701 | -6.38 | 0.35806 | none |
| LSM14B   | 0.08   | 0.1295  | 0.6006 | 0.56195 | 0.701 | -6.38 | 0.63443 | none |
| ZNF717   | 0.073  | 0.0071  | 0.6002 | 0.56219 | 0.702 | -6.38 | 0.3865  | none |
| ZNF84    | -0.076 | -0.075  | -0.6   | 0.56223 | 0.702 | -6.38 | 0.61269 | none |
| ATF3     | -0.128 | -0.06   | -0.6   | 0.5623  | 0.702 | -6.38 | 1.6849  | none |
| OR1N1    | -0.042 | -0.0431 | -0.6   | 0.56242 | 0.702 | -6.38 | 0       | none |
| THNSL1   | -0.088 | -0.0456 | -0.6   | 0.56256 | 0.702 | -6.38 | 1.79659 | none |
| ASS1     | -0.131 | -0.1577 | -0.6   | 0.56261 | 0.702 | -6.38 | 0.21123 | none |
| CALML4   | 0.072  | 0.1208  | 0.599  | 0.56297 | 0.702 | -6.38 | 0.57716 | none |
| ZNF248   | -0.138 | -0.1165 | -0.599 | 0.56304 | 0.702 | -6.38 | 1.17592 | none |
| MCUB     | 0.106  | 0.0013  | 0.5984 | 0.56334 | 0.703 | -6.38 | 0.41507 | none |
| CST3     | -0.074 | -0.0391 | -0.598 | 0.56381 | 0.703 | -6.38 | 0.89437 | none |
| SERPINA3 | -0.093 | -0.0914 | -0.597 | 0.56399 | 0.703 | -6.38 | 1.07129 | none |
| UST      | 0.166  | 0.155   | 0.5974 | 0.56401 | 0.703 | -6.38 | 0.93241 | none |
| FOS      | 0.112  | 0.0919  | 0.597  | 0.56423 | 0.703 | -6.38 | 0.54091 | none |
| FOXD4L5  | -0.044 | -0.0353 | -0.597 | 0.56433 | 0.704 | -6.38 | 0.39054 | none |
| AGL      | 0.068  | 0.0872  | 0.5968 | 0.56436 | 0.704 | -6.38 | 0.86883 | none |
| PENK     | 0.062  | 0.085   | 0.5966 | 0.5645  | 0.704 | -6.38 | -0.31   | none |
| TAAR2    | -0.043 | -0.0426 | -0.597 | 0.56451 | 0.704 | -6.38 | 0       | none |
| SMIM10   | 0.093  | 0.0936  | 0.5963 | 0.56468 | 0.704 | -6.38 | -0.4119 | none |

|           |        |         |        |         |       |       |         |      |
|-----------|--------|---------|--------|---------|-------|-------|---------|------|
| GRWD1     | 0.063  | 0.0529  | 0.5962 | 0.56474 | 0.704 | -6.38 | -0.0456 | none |
| PRSS54    | -0.049 | -0.0148 | -0.596 | 0.56487 | 0.704 | -6.38 | 1.06067 | none |
| OR4K14    | 0.043  | 0.0431  | 0.5959 | 0.56493 | 0.704 | -6.38 | 0       | none |
| MUS81     | 0.05   | 0.066   | 0.5959 | 0.56495 | 0.704 | -6.38 | -0.408  | none |
| HOXD12    | 0.045  | 0.0455  | 0.5959 | 0.56495 | 0.704 | -6.38 | -0.1265 | none |
| TMEM202   | 0.043  | 0.0431  | 0.5958 | 0.56499 | 0.704 | -6.38 | 0       | none |
| CD177     | 0.057  | 0.0421  | 0.5957 | 0.56508 | 0.704 | -6.38 | -0.9413 | none |
| MTRNR2L   | 0.061  | 0.0587  | 0.5956 | 0.56511 | 0.704 | -6.38 | 0.87654 | none |
| CAV3      | -0.108 | -0.0794 | -0.596 | 0.56516 | 0.704 | -6.38 | 0.4035  | none |
| OGN       | -0.054 | -0.0514 | -0.596 | 0.56517 | 0.704 | -6.38 | -0.1422 | none |
| NOD2      | -0.05  | -0.0224 | -0.595 | 0.56527 | 0.704 | -6.38 | 0.13236 | none |
| ENOPH1    | -0.059 | -0.0881 | -0.595 | 0.56535 | 0.704 | -6.38 | 1.28654 | none |
| EVI2B     | 0.103  | 0.0878  | 0.5951 | 0.56549 | 0.704 | -6.39 | 1.04788 | none |
| ADORA3    | 0.041  | 0.0371  | 0.595  | 0.5655  | 0.704 | -6.39 | 0.68944 | none |
| AOC2      | 0.058  | 0.1143  | 0.5947 | 0.56569 | 0.704 | -6.39 | -0.3066 | none |
| LONRF3    | -0.061 | 0.0225  | -0.595 | 0.56569 | 0.704 | -6.39 | 0.63524 | none |
| LCE5A     | -0.042 | -0.0424 | -0.594 | 0.56591 | 0.704 | -6.39 | 1.04303 | none |
| TREM2     | -0.042 | -0.0424 | -0.594 | 0.56591 | 0.704 | -6.39 | -0.5763 | none |
| GPN1      | -0.053 | -0.097  | -0.594 | 0.56597 | 0.704 | -6.39 | 0.35258 | none |
| PCGF5     | 0.051  | 0.0222  | 0.5942 | 0.56601 | 0.704 | -6.39 | 1.90414 | none |
| WWC1      | 0.118  | 0.1648  | 0.5942 | 0.56604 | 0.704 | -6.39 | 0.84581 | none |
| ANXA8     | 0.055  | 0.0633  | 0.5941 | 0.56611 | 0.704 | -6.39 | 0.02547 | none |
| LMO4      | -0.086 | -0.0919 | -0.594 | 0.56611 | 0.704 | -6.39 | 1.25816 | none |
| SLC25A36  | 0.064  | 0.0147  | 0.594  | 0.56617 | 0.704 | -6.39 | 1.30542 | none |
| NKX2-8    | -0.048 | -0.0251 | -0.594 | 0.56636 | 0.704 | -6.39 | 1.52557 | none |
| RFTN1     | 0.076  | 0.1424  | 0.5937 | 0.56639 | 0.704 | -6.39 | 1.07439 | none |
| ADCY9     | 0.056  | 0.1182  | 0.5937 | 0.56639 | 0.704 | -6.39 | 0.78397 | none |
| PRRX2     | -0.062 | -0.0251 | -0.594 | 0.56644 | 0.704 | -6.39 | 1.11632 | none |
| ABCD3     | 0.06   | 0.08    | 0.5936 | 0.56645 | 0.704 | -6.39 | 1.91909 | none |
| PTPRJ     | 0.183  | 0.2587  | 0.5932 | 0.56668 | 0.705 | -6.39 | -0.1075 | none |
| RNF169    | 0.139  | 0.2695  | 0.5932 | 0.56668 | 0.705 | -6.39 | 0.59505 | none |
| CTNNA3    | -0.054 | -0.0496 | -0.593 | 0.56677 | 0.705 | -6.39 | 1.71784 | none |
| EPB41L1   | -0.126 | -0.1561 | -0.593 | 0.56695 | 0.705 | -6.39 | 0.63463 | none |
| MSRB1     | -0.087 | -0.101  | -0.593 | 0.56705 | 0.705 | -6.39 | 0.8088  | none |
| KRTAP13-4 | 0.043  | 0.0428  | 0.5924 | 0.56719 | 0.705 | -6.39 | -0.832  | none |
| POC5      | -0.1   | -0.1019 | -0.592 | 0.56724 | 0.705 | -6.39 | 0.46696 | none |
| RBMXL3    | 0.046  | 0.0229  | 0.592  | 0.56744 | 0.705 | -6.39 | -0.8884 | none |
| OR6C2     | 0.043  | 0.0427  | 0.5919 | 0.56749 | 0.705 | -6.39 | 0.39601 | none |
| USP17L23  | -0.125 | -0.0498 | -0.592 | 0.56766 | 0.705 | -6.39 | -0.3349 | none |
| MFSD14A   | -0.092 | -0.1197 | -0.592 | 0.56766 | 0.705 | -6.39 | 1.42712 | none |

|          |        |         |        |         |       |       |         |      |
|----------|--------|---------|--------|---------|-------|-------|---------|------|
| TARBP2   | -0.073 | -0.0926 | -0.592 | 0.56768 | 0.705 | -6.39 | 0.64828 | none |
| IZUMO1R  | 0.043  | 0.0427  | 0.5916 | 0.56772 | 0.705 | -6.39 | 0       | none |
| SPECC1L  | 0.195  | 0.3107  | 0.5915 | 0.56777 | 0.705 | -6.39 | 0.5103  | none |
| NLGN3    | 0.073  | 0.0775  | 0.5915 | 0.56778 | 0.705 | -6.39 | -0.0414 | none |
| ARC      | -0.059 | -0.0389 | -0.591 | 0.5678  | 0.705 | -6.39 | 1.2913  | none |
| NR2F2    | 0.074  | 0.0811  | 0.5915 | 0.56781 | 0.705 | -6.39 | 1.01743 | none |
| GAL3ST2  | -0.042 | -0.0421 | -0.591 | 0.56791 | 0.705 | -6.39 | 1.30781 | none |
| OR10J3   | 0.043  | 0.0427  | 0.5913 | 0.56792 | 0.705 | -6.39 | 0       | none |
| MYBL2    | 0.107  | 0.24    | 0.5912 | 0.568   | 0.705 | -6.39 | 0.04325 | none |
| SLIT2    | 0.089  | 0.0887  | 0.5911 | 0.56803 | 0.705 | -6.39 | -0.6813 | none |
| ENPP5    | -0.071 | -0.0653 | -0.591 | 0.56803 | 0.705 | -6.39 | 0.16218 | none |
| DUSP16   | 0.118  | 0.1585  | 0.5907 | 0.56829 | 0.706 | -6.39 | -0.3645 | none |
| TECRL    | 0.113  | 0.1113  | 0.5906 | 0.56836 | 0.706 | -6.39 | 1.65904 | none |
| ABHD5    | 0.056  | -0.033  | 0.5906 | 0.56836 | 0.706 | -6.39 | -0.3024 | none |
| RCOR2    | 0.047  | 0.0474  | 0.5903 | 0.56856 | 0.706 | -6.39 | 1.59297 | none |
| DAOA     | 0.1    | 0.05    | 0.5903 | 0.56857 | 0.706 | -6.39 | -0.4762 | none |
| RIC8A    | -0.07  | -0.0465 | -0.59  | 0.56868 | 0.706 | -6.39 | 1.36103 | none |
| UNCX     | -0.04  | -0.0192 | -0.59  | 0.56884 | 0.706 | -6.39 | 0       | none |
| ACKR4    | 0.042  | 0.0582  | 0.5898 | 0.56889 | 0.706 | -6.39 | 0.99439 | none |
| CDK15    | -0.061 | -0.0668 | -0.59  | 0.56894 | 0.706 | -6.39 | 0.87926 | none |
| PRSS56   | 0.042  | 0.0459  | 0.5896 | 0.569   | 0.706 | -6.39 | 0       | none |
| CCS      | -0.063 | -0.0488 | -0.59  | 0.56905 | 0.706 | -6.39 | 0.09497 | none |
| DTX2     | 0.062  | 0.0349  | 0.5894 | 0.56914 | 0.706 | -6.39 | -0.3719 | none |
| MUC20    | -0.057 | -0.0172 | -0.589 | 0.56918 | 0.706 | -6.39 | 0.90755 | none |
| KRTAP5-6 | 0.042  | 0.0425  | 0.5893 | 0.5692  | 0.706 | -6.39 | -0.5385 | none |
| EXOC3L4  | -0.112 | -0.0795 | -0.589 | 0.56925 | 0.706 | -6.39 | -0.0389 | none |
| BPIFB2   | -0.042 | -0.0512 | -0.589 | 0.5693  | 0.706 | -6.39 | 1.50573 | none |
| PTPDC1   | -0.052 | 0.0194  | -0.589 | 0.5697  | 0.706 | -6.39 | 1.25946 | none |
| CARD10   | -0.072 | -0.0589 | -0.588 | 0.56971 | 0.706 | -6.39 | 0.61124 | none |
| CXCR2    | 0.089  | 0.165   | 0.5884 | 0.56977 | 0.706 | -6.39 | 0.47826 | none |
| SGCA     | -0.063 | -0.0531 | -0.588 | 0.56983 | 0.707 | -6.39 | 1.62983 | none |
| NECTIN2  | -0.067 | -0.0448 | -0.588 | 0.57    | 0.707 | -6.39 | 0.15914 | none |
| OR5F1    | 0.042  | 0.0424  | 0.588  | 0.57001 | 0.707 | -6.39 | -0.599  | none |
| RCVRN    | 0.069  | 0.0661  | 0.5879 | 0.57007 | 0.707 | -6.39 | -0.4249 | none |
| ALDH16A1 | 0.051  | 0.0169  | 0.5879 | 0.5701  | 0.707 | -6.39 | 0.46467 | none |
| ARHGEF3  | 0.103  | 0.0982  | 0.5879 | 0.57011 | 0.707 | -6.39 | 0.43422 | none |
| SLC35B2  | -0.087 | -0.1227 | -0.588 | 0.57018 | 0.707 | -6.39 | 1.27842 | none |
| MAGEB17  | -0.042 | -0.0417 | -0.588 | 0.57018 | 0.707 | -6.39 | 1.52319 | none |
| ENTPD8   | 0.046  | 0.0494  | 0.5877 | 0.57022 | 0.707 | -6.39 | 0.70123 | none |
| CT47A7   | 0.07   | 0.0704  | 0.5876 | 0.57031 | 0.707 | -6.39 | 0.74555 | none |



|           |        |         |        |         |       |       |         |      |
|-----------|--------|---------|--------|---------|-------|-------|---------|------|
| SFRP4     | -0.052 | -0.0296 | -0.588 | 0.57034 | 0.707 | -6.39 | 0.87122 | none |
| SLC25A10  | -0.053 | -0.0149 | -0.587 | 0.57039 | 0.707 | -6.39 | 1.37752 | none |
| LAMTOR4   | -0.075 | -0.0811 | -0.587 | 0.57044 | 0.707 | -6.39 | 0.70824 | none |
| ADAMTS9   | -0.122 | -0.0986 | -0.587 | 0.57046 | 0.707 | -6.39 | 0.17821 | none |
| HIST1H2BI | 0.066  | -0.0477 | 0.5871 | 0.5706  | 0.707 | -6.39 | 0.0832  | none |
| TSPAN1    | -0.092 | -0.0703 | -0.587 | 0.57085 | 0.707 | -6.39 | -0.1632 | none |
| ENTPD2    | -0.075 | -0.0365 | -0.586 | 0.57128 | 0.707 | -6.39 | 0.66473 | none |
| RYBP      | -0.071 | -0.046  | -0.586 | 0.57136 | 0.707 | -6.39 | 1.0421  | none |
| NETO1     | -0.14  | -0.1064 | -0.586 | 0.57136 | 0.707 | -6.39 | 1.63974 | none |
| EPB42     | 0.099  | 0.1013  | 0.5858 | 0.57144 | 0.708 | -6.39 | -0.2802 | none |
| SOCS2     | 0.078  | 0.0204  | 0.5856 | 0.57156 | 0.708 | -6.39 | 0.51279 | none |
| TMEM262   | 0.05   | 0.0882  | 0.5856 | 0.57159 | 0.708 | -6.39 | 0.13256 | none |
| KCTD11    | 0.062  | 0.0782  | 0.5855 | 0.57164 | 0.708 | -6.39 | -0.3184 | none |
| PRSS2     | -0.105 | -0.127  | -0.585 | 0.57169 | 0.708 | -6.39 | 0.77704 | none |
| ETV2      | 0.058  | 0.0346  | 0.5853 | 0.57177 | 0.708 | -6.39 | -0.0248 | none |
| NYAP1     | -0.054 | -0.0585 | -0.585 | 0.57178 | 0.708 | -6.39 | 0.3978  | none |
| BORCS8-IV | 0.119  | 0.1449  | 0.5852 | 0.57184 | 0.708 | -6.39 | 0.90592 | none |
| CCR5      | 0.05   | -0.0268 | 0.5847 | 0.57215 | 0.708 | -6.39 | -0.7586 | none |
| GDF10     | -0.046 | -0.0294 | -0.585 | 0.57215 | 0.708 | -6.39 | 0.84794 | none |
| MAN1A2    | 0.076  | 0.024   | 0.5846 | 0.57221 | 0.708 | -6.39 | 0.06313 | none |
| NINL      | 0.134  | 0.1837  | 0.5846 | 0.57221 | 0.708 | -6.39 | -0.3174 | none |
| WDR37     | 0.072  | 0.1656  | 0.5845 | 0.57229 | 0.708 | -6.39 | -0.4198 | none |
| SLC25A14  | 0.075  | 0.0355  | 0.5844 | 0.57233 | 0.708 | -6.39 | 0.06229 | none |
| MRPS5     | 0.044  | 0.0581  | 0.5843 | 0.57244 | 0.708 | -6.39 | 1.04769 | none |
| FOXS1     | -0.043 | -0.0286 | -0.584 | 0.57244 | 0.708 | -6.39 | 0.81398 | none |
| MBD3L1    | -0.094 | -0.0922 | -0.584 | 0.57246 | 0.708 | -6.39 | 0.25337 | none |
| TMEM223   | 0.095  | 0.054   | 0.5841 | 0.57256 | 0.708 | -6.39 | 0.21738 | none |
| WBP1      | 0.147  | 0.1258  | 0.584  | 0.57262 | 0.708 | -6.39 | 0.36559 | none |
| CABLES1   | -0.118 | -0.2264 | -0.584 | 0.57266 | 0.708 | -6.39 | 0.15989 | none |
| VIPR1     | -0.077 | 0.0081  | -0.584 | 0.57266 | 0.708 | -6.39 | 0.24199 | none |
| FAP       | 0.058  | 0.0624  | 0.5839 | 0.5727  | 0.708 | -6.39 | -0.7832 | none |
| ZFAND5    | 0.076  | 0.124   | 0.5837 | 0.57278 | 0.708 | -6.39 | 1.25581 | none |
| THRSP     | -0.046 | -0.0292 | -0.584 | 0.57287 | 0.708 | -6.39 | 0.34236 | none |
| MAPK15    | -0.048 | 0.0266  | -0.583 | 0.57318 | 0.708 | -6.39 | 0.14309 | none |
| CHRFAM7   | -0.053 | -0.0145 | -0.582 | 0.57367 | 0.709 | -6.39 | 0.10182 | none |
| HMCES     | -0.044 | -0.0603 | -0.582 | 0.5737  | 0.709 | -6.39 | -0.208  | none |
| YAF2      | 0.058  | -0.0217 | 0.5823 | 0.57372 | 0.709 | -6.39 | 0.71366 | none |
| CCDC190   | -0.041 | -0.0412 | -0.582 | 0.57372 | 0.709 | -6.39 | 0.11503 | none |
| GRM4      | 0.081  | 0.0234  | 0.5822 | 0.57375 | 0.709 | -6.39 | -0.2281 | none |
| FUT5      | 0.041  | 0.0419  | 0.5822 | 0.57376 | 0.709 | -6.39 | 0       | none |

|          |        |         |        |         |       |       |         |      |
|----------|--------|---------|--------|---------|-------|-------|---------|------|
| CCNB3    | -0.079 | -0.0827 | -0.582 | 0.5739  | 0.709 | -6.39 | -0.2466 | none |
| ENC1     | -0.061 | -0.0582 | -0.582 | 0.57391 | 0.709 | -6.39 | 1.58472 | none |
| FTSJ1    | -0.058 | -0.0798 | -0.582 | 0.5742  | 0.709 | -6.39 | 0.87777 | none |
| MAPRE3   | 0.045  | 0.05    | 0.5814 | 0.57431 | 0.709 | -6.39 | 0.72538 | none |
| TMED2    | -0.108 | -0.1983 | -0.581 | 0.57441 | 0.709 | -6.39 | 1.18468 | none |
| GRM2     | 0.051  | 0.0832  | 0.581  | 0.57454 | 0.709 | -6.39 | 1.44406 | none |
| LRRC8D   | -0.065 | -0.011  | -0.581 | 0.57483 | 0.71  | -6.39 | 0.6117  | none |
| NBPF4    | 0.04   | 0.042   | 0.5802 | 0.57504 | 0.71  | -6.39 | 0       | none |
| RARRES2  | -0.087 | -0.0396 | -0.58  | 0.57505 | 0.71  | -6.39 | 1.1821  | none |
| LRRC59   | 0.066  | 0.1228  | 0.5798 | 0.57536 | 0.71  | -6.39 | 0.54514 | none |
| SDF2     | 0.07   | -0.0139 | 0.5795 | 0.57553 | 0.71  | -6.39 | -0.3829 | none |
| KBTBD13  | 0.041  | 0.0502  | 0.5793 | 0.57568 | 0.711 | -6.39 | 1.80324 | none |
| RXRG     | -0.043 | -0.041  | -0.579 | 0.57582 | 0.711 | -6.39 | -0.6333 | none |
| RAD51C   | 0.08   | -0.0731 | 0.5788 | 0.57598 | 0.711 | -6.4  | -0.216  | none |
| EXOC6    | 0.111  | 0.1305  | 0.5788 | 0.57598 | 0.711 | -6.4  | 0.45012 | none |
| CD101    | -0.122 | -0.0937 | -0.579 | 0.57612 | 0.711 | -6.4  | 0.1761  | none |
| AKAP12   | 0.061  | 0.1032  | 0.5785 | 0.5762  | 0.711 | -6.4  | 0.41452 | none |
| CDX1     | -0.041 | -0.0409 | -0.578 | 0.5762  | 0.711 | -6.4  | 0       | none |
| GSTA3    | -0.041 | -0.0409 | -0.578 | 0.57635 | 0.711 | -6.4  | 1.00425 | none |
| TRIM4    | -0.079 | -0.067  | -0.578 | 0.57637 | 0.711 | -6.4  | 1.21224 | none |
| ZNF300   | 0.043  | 0.0353  | 0.5777 | 0.5767  | 0.711 | -6.4  | 0.49812 | none |
| SLC39A10 | 0.15   | 0.2101  | 0.5774 | 0.57689 | 0.712 | -6.4  | 1.3306  | none |
| RNF148   | 0.041  | 0.0413  | 0.5769 | 0.57722 | 0.712 | -6.4  | 0       | none |
| DNAJA2   | 0.045  | 0.02    | 0.5767 | 0.57737 | 0.712 | -6.4  | 1.33447 | none |
| RAPGEF4  | 0.08   | 0.0672  | 0.5765 | 0.57748 | 0.712 | -6.4  | 0.10476 | none |
| TMEM63B  | -0.093 | 0.0133  | -0.576 | 0.57787 | 0.713 | -6.4  | 1.22609 | none |
| MND1     | -0.068 | -0.0619 | -0.576 | 0.57803 | 0.713 | -6.4  | 1.00346 | none |
| SMIM1    | -0.09  | -0.0411 | -0.575 | 0.57812 | 0.713 | -6.4  | 1.46679 | none |
| C6ORF89  | -0.093 | -0.0759 | -0.575 | 0.57817 | 0.713 | -6.4  | 0.99553 | none |
| HOXD10   | -0.051 | -0.0509 | -0.575 | 0.57828 | 0.713 | -6.4  | -0.5339 | none |
| IQCD     | -0.043 | -0.0164 | -0.575 | 0.57852 | 0.713 | -6.4  | 0.4781  | none |
| RHOD     | -0.121 | -0.0876 | -0.575 | 0.57872 | 0.713 | -6.4  | 1.93708 | none |
| ASB2     | -0.08  | -0.0147 | -0.574 | 0.57879 | 0.713 | -6.4  | 0.61275 | none |
| C8ORF33  | 0.086  | 0.0591  | 0.5743 | 0.57892 | 0.713 | -6.4  | 0.77267 | none |
| DNAAF2   | 0.063  | 0.0609  | 0.5741 | 0.579   | 0.713 | -6.4  | 0.93509 | none |
| ZNRD1    | -0.212 | -0.3112 | -0.574 | 0.57927 | 0.714 | -6.4  | 1.28622 | none |
| DDX18    | 0.094  | 0.1198  | 0.5731 | 0.57966 | 0.714 | -6.4  | 0.78098 | none |
| COG6     | 0.125  | 0.1685  | 0.5726 | 0.57999 | 0.715 | -6.4  | 1.06036 | none |
| TSPAN9   | 0.069  | 0.0552  | 0.5725 | 0.58006 | 0.715 | -6.4  | -0.7719 | none |
| FGF21    | 0.058  | 0.0577  | 0.5722 | 0.58029 | 0.715 | -6.4  | 0.75344 | none |

|          |        |         |        |         |       |      |         |      |
|----------|--------|---------|--------|---------|-------|------|---------|------|
| AHSP     | 0.049  | 0.0651  | 0.5721 | 0.58035 | 0.715 | -6.4 | -0.7714 | none |
| ARSI     | 0.046  | 0.0455  | 0.5715 | 0.58075 | 0.715 | -6.4 | 0.20959 | none |
| FAM8A1   | 0.05   | 0.0094  | 0.5713 | 0.58084 | 0.715 | -6.4 | 0.38823 | none |
| PCDHB5   | -0.046 | -0.0473 | -0.571 | 0.5809  | 0.715 | -6.4 | -0.0304 | none |
| CD8A     | 0.065  | -0.0013 | 0.5709 | 0.5811  | 0.716 | -6.4 | 0.3318  | none |
| C12ORF74 | 0.04   | 0.0281  | 0.5707 | 0.58124 | 0.716 | -6.4 | -0.1801 | none |
| RMI2     | -0.133 | -0.0858 | -0.571 | 0.58126 | 0.716 | -6.4 | 1.0273  | none |
| BFSP2    | -0.096 | 0.0133  | -0.571 | 0.58127 | 0.716 | -6.4 | 0.45036 | none |
| TMEM248  | 0.058  | 0.0752  | 0.5704 | 0.58141 | 0.716 | -6.4 | 1.56796 | none |
| AP1M2    | 0.229  | 0.1864  | 0.5701 | 0.58163 | 0.716 | -6.4 | -0.5049 | none |
| CAND2    | 0.064  | 0.1367  | 0.5701 | 0.58164 | 0.716 | -6.4 | 0.51799 | none |
| ANKRD30E | 0.095  | -0.0093 | 0.5699 | 0.58178 | 0.716 | -6.4 | -0.0395 | none |
| C10ORF10 | 0.04   | 0.0338  | 0.5698 | 0.58181 | 0.716 | -6.4 | -0.781  | none |
| C5ORF58  | 0.102  | 0.1268  | 0.5695 | 0.58199 | 0.716 | -6.4 | 1.0945  | none |
| BECN2    | 0.038  | 0.0416  | 0.5694 | 0.58206 | 0.716 | -6.4 | 0.77936 | none |
| SCCPDH   | 0.072  | -0.0145 | 0.5694 | 0.5821  | 0.716 | -6.4 | 1.17477 | none |
| RALGAPB  | 0.092  | 0.1504  | 0.5692 | 0.58225 | 0.716 | -6.4 | 0.19725 | none |
| CEP70    | 0.144  | 0.0968  | 0.569  | 0.58234 | 0.716 | -6.4 | -0.1503 | none |
| DUXA     | -0.042 | -0.0265 | -0.569 | 0.58249 | 0.717 | -6.4 | 0.70421 | none |
| RSPRY1   | 0.069  | 0.068   | 0.5685 | 0.58268 | 0.717 | -6.4 | 0.55457 | none |
| TREX1    | -0.064 | -0.0454 | -0.568 | 0.58272 | 0.717 | -6.4 | 1.96592 | none |
| PSG3     | 0.04   | 0.0405  | 0.5682 | 0.58288 | 0.717 | -6.4 | -0.9207 | none |
| MT-CYB   | 0.091  | 0.122   | 0.5679 | 0.58309 | 0.717 | -6.4 | 0.11246 | none |
| PPP1R9B  | 0.145  | 0.2485  | 0.5678 | 0.58312 | 0.717 | -6.4 | 0.04711 | none |
| CSNK1G2  | 0.106  | 0.1979  | 0.5677 | 0.58317 | 0.717 | -6.4 | -0.0283 | none |
| BECN1    | 0.055  | 0.0312  | 0.5677 | 0.5832  | 0.717 | -6.4 | -0.9435 | none |
| GPR174   | -0.078 | -0.1958 | -0.568 | 0.58325 | 0.717 | -6.4 | -0.0278 | none |
| FZD5     | 0.043  | 0.0363  | 0.5676 | 0.58326 | 0.717 | -6.4 | 0.19178 | none |
| PHF20    | 0.078  | 0.0275  | 0.5675 | 0.58336 | 0.717 | -6.4 | 0.04846 | none |
| ZNF679   | 0.04   | 0.0404  | 0.5674 | 0.58337 | 0.717 | -6.4 | 0       | none |
| SNRNP27  | 0.065  | 0.0147  | 0.5671 | 0.58357 | 0.717 | -6.4 | -0.7916 | none |
| ZXDC     | 0.11   | 0.2033  | 0.5667 | 0.58384 | 0.718 | -6.4 | 0.32468 | none |
| PI16     | 0.167  | -0.0342 | 0.5666 | 0.58389 | 0.718 | -6.4 | -0.2486 | none |
| SYVN1    | 0.066  | 0.1515  | 0.5665 | 0.58396 | 0.718 | -6.4 | 0.52892 | none |
| UHRF1BP1 | 0.13   | 0.2102  | 0.5664 | 0.58407 | 0.718 | -6.4 | 1.31296 | none |
| PEX6     | -0.053 | -0.0271 | -0.566 | 0.58411 | 0.718 | -6.4 | 1.12337 | none |
| IL12B    | -0.041 | -0.0188 | -0.566 | 0.58415 | 0.718 | -6.4 | -0.3633 | none |
| TCP11L1  | 0.093  | 0.1219  | 0.5659 | 0.58437 | 0.718 | -6.4 | -0.0998 | none |
| CACNG1   | -0.045 | -0.0304 | -0.566 | 0.58438 | 0.718 | -6.4 | 1.93674 | none |
| TUBB8    | -0.061 | -0.0423 | -0.566 | 0.58444 | 0.718 | -6.4 | 1.20678 | none |

|          |        |         |        |         |       |       |         |            |
|----------|--------|---------|--------|---------|-------|-------|---------|------------|
| WDR54    | 0.116  | -0.002  | 0.5651 | 0.58487 | 0.718 | -6.4  | 0.14372 | none       |
| PDCL2    | -0.04  | -0.0397 | -0.565 | 0.58492 | 0.718 | -6.4  | 0       | none       |
| CLU      | -0.121 | -0.1776 | -0.565 | 0.58505 | 0.718 | -6.4  | -0.1253 | none       |
| BAIAP3   | 0.064  | 0.1179  | 0.5645 | 0.58526 | 0.719 | -6.4  | 1.10706 | none       |
| CCR10    | -0.092 | -0.2294 | -0.565 | 0.58527 | 0.719 | -6.4  | 0.7708  | none       |
| TMEM104  | 0.105  | 0.0844  | 0.5645 | 0.58528 | 0.719 | -6.4  | 0.34048 | none       |
| ZNF735   | 0.042  | 0.0475  | 0.5643 | 0.5854  | 0.719 | -6.4  | 0.70873 | none       |
| MYBPHL   | 0.042  | 0.0531  | 0.5643 | 0.5854  | 0.719 | -6.4  | 0.03576 | none       |
| LXN      | -0.083 | -0.0904 | -0.564 | 0.58546 | 0.719 | -6.4  | 0.11097 | none       |
| CLTCL1   | 0.085  | 0.1017  | 0.5637 | 0.58583 | 0.719 | -6.4  | 0.40271 | none       |
| ACBD6    | -0.045 | 0.0094  | -0.564 | 0.58592 | 0.719 | -6.4  | 2.09406 | AA-related |
| NTPCR    | -0.078 | -0.2102 | -0.563 | 0.586   | 0.719 | -6.4  | 1.28793 | none       |
| XRCC5    | -0.06  | -0.0149 | -0.563 | 0.58601 | 0.719 | -6.4  | 0.17508 | none       |
| MS4A13   | 0.083  | 0.083   | 0.5633 | 0.58608 | 0.719 | -6.4  | -0.4698 | none       |
| HEATR5B  | 0.203  | 0.2313  | 0.5631 | 0.58619 | 0.719 | -6.4  | 1.05239 | none       |
| CTDSP1   | 0.05   | 0.0991  | 0.563  | 0.58625 | 0.719 | -6.4  | 1.01128 | none       |
| METTL9   | -0.089 | -0.152  | -0.563 | 0.58636 | 0.719 | -6.4  | 0.70221 | none       |
| BPY2     | 0.04   | 0.04    | 0.5626 | 0.58655 | 0.719 | -6.4  | -0.841  | none       |
| BPY2B    | 0.04   | 0.04    | 0.5626 | 0.58655 | 0.719 | -6.4  | -0.841  | none       |
| BPY2C    | 0.04   | 0.04    | 0.5626 | 0.58655 | 0.719 | -6.4  | -0.841  | none       |
| DZIP1L   | 0.08   | 0.1196  | 0.5623 | 0.58675 | 0.72  | -6.4  | 0.19136 | none       |
| TNFRSF21 | 0.048  | 0.0658  | 0.562  | 0.58689 | 0.72  | -6.41 | -0.1495 | none       |
| GALNTL6  | 0.039  | 0.0419  | 0.5618 | 0.58708 | 0.72  | -6.41 | 0       | none       |
| ACER2    | 0.052  | 0.0017  | 0.5615 | 0.58723 | 0.72  | -6.41 | -0.2997 | none       |
| TOE1     | -0.052 | 0.0074  | -0.562 | 0.58724 | 0.72  | -6.41 | 1.98229 | none       |
| ATN1     | 0.138  | 0.1949  | 0.5614 | 0.58729 | 0.72  | -6.41 | -0.8366 | none       |
| PDHB     | -0.056 | -0.088  | -0.561 | 0.58745 | 0.72  | -6.41 | 0.69836 | none       |
| ADO      | 0.042  | 0.0246  | 0.5609 | 0.58763 | 0.72  | -6.41 | -0.13   | none       |
| RASSF1   | 0.051  | 0.0825  | 0.5609 | 0.58767 | 0.72  | -6.41 | 1.21146 | none       |
| HNRNPCL2 | -0.047 | -0.0473 | -0.561 | 0.58774 | 0.72  | -6.41 | 0.85531 | none       |
| GZMM     | -0.109 | -0.1623 | -0.561 | 0.58782 | 0.72  | -6.41 | 1.33527 | none       |
| PLXNB2   | 0.06   | 0.0383  | 0.5606 | 0.58786 | 0.72  | -6.41 | -0.3914 | none       |
| FSBP     | 0.087  | 0.0581  | 0.5605 | 0.58789 | 0.72  | -6.41 | 0.07482 | none       |
| RGS5     | 0.082  | -0.0623 | 0.5604 | 0.58795 | 0.72  | -6.41 | 1.47317 | none       |
| ACSBG2   | 0.11   | 0.1011  | 0.5604 | 0.58798 | 0.72  | -6.41 | 1.29656 | none       |
| TRMT61B  | 0.08   | -0.0111 | 0.5604 | 0.58799 | 0.72  | -6.41 | 0.25511 | none       |
| TEX28    | 0.039  | 0.0401  | 0.5603 | 0.58801 | 0.72  | -6.41 | 0.37129 | none       |
| TPPP     | 0.039  | 0.0672  | 0.5602 | 0.5881  | 0.72  | -6.41 | 0.67563 | none       |
| SCGB3A2  | 0.111  | 0.2957  | 0.56   | 0.58821 | 0.72  | -6.41 | 1.12433 | none       |
| PRB4     | 0.04   | 0.0397  | 0.56   | 0.58826 | 0.72  | -6.41 | 0       | none       |

|           |        |         |        |         |       |       |         |      |
|-----------|--------|---------|--------|---------|-------|-------|---------|------|
| INS-IGF2  | 0.04   | 0.04    | 0.5599 | 0.58831 | 0.72  | -6.41 | 1.18529 | none |
| SERF1B    | 0.103  | 0.0235  | 0.5599 | 0.58831 | 0.72  | -6.41 | -0.4596 | none |
| FASTK     | -0.089 | -0.1299 | -0.56  | 0.5884  | 0.72  | -6.41 | 1.54898 | none |
| SGCD      | 0.046  | 0.0454  | 0.5597 | 0.58841 | 0.72  | -6.41 | 0.80964 | none |
| SNRPA1    | -0.041 | -0.0384 | -0.56  | 0.58846 | 0.72  | -6.41 | 0.57242 | none |
| RHCG      | 0.06   | 0.055   | 0.5596 | 0.58851 | 0.72  | -6.41 | 0.91729 | none |
| DNAJC11   | 0.115  | 0.2715  | 0.5596 | 0.58851 | 0.72  | -6.41 | -0.0126 | none |
| C11ORF96  | -0.046 | -0.0318 | -0.559 | 0.58879 | 0.721 | -6.41 | 0.31117 | none |
| GNAI2     | -0.104 | -0.0244 | -0.559 | 0.58886 | 0.721 | -6.41 | 0.54452 | none |
| EED       | 0.066  | 0.0599  | 0.5587 | 0.5891  | 0.721 | -6.41 | -0.2181 | none |
| TNFRSF19  | 0.075  | 0.0749  | 0.5587 | 0.58911 | 0.721 | -6.41 | 0.39695 | none |
| IGSF21    | -0.043 | -0.0175 | -0.559 | 0.58912 | 0.721 | -6.41 | 1.80627 | none |
| HEMK1     | 0.095  | 0.0221  | 0.5585 | 0.58924 | 0.721 | -6.41 | 0.99853 | none |
| MSI1      | -0.045 | -0.0289 | -0.558 | 0.58925 | 0.721 | -6.41 | 0.41234 | none |
| GOLGA1    | -0.105 | -0.0022 | -0.558 | 0.58961 | 0.721 | -6.41 | 1.53715 | none |
| NAB1      | 0.112  | 0.1779  | 0.5579 | 0.58963 | 0.721 | -6.41 | 0.2009  | none |
| OBP2A     | -0.074 | -0.0509 | -0.558 | 0.58963 | 0.721 | -6.41 | 1.56204 | none |
| TRIM39-RI | 0.04   | 0.0395  | 0.5578 | 0.58968 | 0.721 | -6.41 | 0       | none |
| CLDN34    | 0.039  | 0.0395  | 0.5571 | 0.59012 | 0.722 | -6.41 | 0.39591 | none |
| TMEM260   | 0.107  | 0.0671  | 0.557  | 0.5902  | 0.722 | -6.41 | 0.47618 | none |
| KHDC1L    | -0.037 | -0.0159 | -0.557 | 0.59048 | 0.722 | -6.41 | -0.5982 | none |
| STT3A     | 0.066  | -0.0226 | 0.5565 | 0.5905  | 0.722 | -6.41 | 0.73315 | none |
| ADSL      | -0.076 | -0.1631 | -0.556 | 0.59072 | 0.722 | -6.41 | 1.38717 | none |
| PANK3     | 0.076  | 0.1265  | 0.5561 | 0.59081 | 0.722 | -6.41 | -0.0486 | none |
| IL26      | -0.047 | -0.029  | -0.556 | 0.59105 | 0.723 | -6.41 | 1.58142 | none |
| SET       | 0.071  | 0.1063  | 0.5556 | 0.59113 | 0.723 | -6.41 | -0.1888 | none |
| HLA-F     | 0.061  | -0.0661 | 0.5555 | 0.59117 | 0.723 | -6.41 | -0.3434 | none |
| FXYD6     | -0.119 | -0.0642 | -0.555 | 0.59125 | 0.723 | -6.41 | 0.92883 | none |
| SRPRA     | 0.09   | 0.1795  | 0.5552 | 0.59138 | 0.723 | -6.41 | 0.69794 | none |
| MFSD14B   | 0.089  | -0.0083 | 0.5552 | 0.59139 | 0.723 | -6.41 | -0.4007 | none |
| ADRB3     | -0.058 | -0.0481 | -0.555 | 0.59154 | 0.723 | -6.41 | 0.85725 | none |
| PPP1R18   | -0.044 | -0.0728 | -0.555 | 0.59166 | 0.723 | -6.41 | 1.35995 | none |
| EPYC      | 0.04   | 0.0391  | 0.5548 | 0.59166 | 0.723 | -6.41 | -0.7614 | none |
| TMEM267   | 0.104  | -0.0034 | 0.5547 | 0.59169 | 0.723 | -6.41 | 0.78135 | none |
| SULT1C3   | -0.039 | -0.0387 | -0.555 | 0.59173 | 0.723 | -6.41 | 0       | none |
| ATP6V1C1  | -0.069 | -0.1099 | -0.554 | 0.59186 | 0.723 | -6.41 | 0.83296 | none |
| KCNIP1    | -0.038 | -0.0377 | -0.554 | 0.59191 | 0.723 | -6.41 | -0.693  | none |
| GLIPR1L1  | 0.045  | 0.0259  | 0.5544 | 0.59192 | 0.723 | -6.41 | 0.66407 | none |
| ACTRT1    | 0.039  | 0.0392  | 0.5544 | 0.59193 | 0.723 | -6.41 | 0       | none |
| DCAF7     | -0.041 | -0.0642 | -0.554 | 0.59195 | 0.723 | -6.41 | 1.20695 | none |

|               |        |         |        |         |       |       |         |      |
|---------------|--------|---------|--------|---------|-------|-------|---------|------|
| CLTC          | -0.075 | -0.0236 | -0.554 | 0.59212 | 0.723 | -6.41 | 0.02232 | none |
| CCDC174       | 0.132  | 0.2115  | 0.5536 | 0.59247 | 0.723 | -6.41 | 0.62556 | none |
| BNC2          | 0.048  | 0.069   | 0.5532 | 0.59267 | 0.724 | -6.41 | -0.5683 | none |
| ANPEP         | -0.12  | -0.0868 | -0.553 | 0.59302 | 0.724 | -6.41 | 0.31924 | none |
| ABCD1         | 0.087  | 0.1201  | 0.5527 | 0.59304 | 0.724 | -6.41 | 1.394   | none |
| RFC3          | -0.072 | -0.11   | -0.552 | 0.59322 | 0.724 | -6.41 | 1.58732 | none |
| AMIGO3        | -0.053 | -0.0627 | -0.552 | 0.59323 | 0.724 | -6.41 | 0.48259 | none |
| HLA-C         | 0.101  | -0.0113 | 0.5522 | 0.59334 | 0.724 | -6.41 | 0.24808 | none |
| RNH1          | 0.048  | 0.062   | 0.5521 | 0.5934  | 0.724 | -6.41 | 0.73462 | none |
| VAMP3         | -0.055 | -0.0959 | -0.552 | 0.59347 | 0.724 | -6.41 | 0.42722 | none |
| CGB1          | 0.04   | 0.0389  | 0.552  | 0.59349 | 0.724 | -6.41 | 0.54348 | none |
| AXIN2         | 0.068  | 0.0719  | 0.5519 | 0.59357 | 0.724 | -6.41 | -0.4139 | none |
| LAGE3         | 0.088  | 0.0852  | 0.5518 | 0.59363 | 0.724 | -6.41 | 0.83909 | none |
| NAALADL1      | 0.07   | 0.0468  | 0.5518 | 0.59364 | 0.724 | -6.41 | 0.21773 | none |
| PGAM4         | -0.137 | -0.053  | -0.552 | 0.59368 | 0.724 | -6.41 | -0.0808 | none |
| PDIA4         | 0.112  | 0.2263  | 0.5511 | 0.59406 | 0.724 | -6.41 | 0.94296 | none |
| GRAPL         | 0.084  | 0.1696  | 0.551  | 0.59413 | 0.724 | -6.41 | 0.99826 | none |
| OR2T35        | 0.04   | 0.0505  | 0.551  | 0.59415 | 0.724 | -6.41 | 0.65405 | none |
| GPC5          | 0.076  | 0.0417  | 0.5509 | 0.5942  | 0.724 | -6.41 | 0.11779 | none |
| CLDND1        | -0.095 | -0.1645 | -0.551 | 0.59422 | 0.724 | -6.41 | 0.4431  | none |
| FAM122B       | 0.084  | -0.0222 | 0.5509 | 0.59424 | 0.724 | -6.41 | -0.7874 | none |
| VASN          | -0.041 | -0.0388 | -0.551 | 0.59424 | 0.724 | -6.41 | 0.70724 | none |
| C1ORF185      | 0.039  | 0.0389  | 0.5509 | 0.59425 | 0.724 | -6.41 | 0.18059 | none |
| LHFPL3        | 0.037  | 0.0337  | 0.5507 | 0.59432 | 0.724 | -6.41 | -0.7712 | none |
| VAT1L         | 0.052  | 0.055   | 0.5507 | 0.59434 | 0.724 | -6.41 | 1.00246 | none |
| PPCS          | 0.078  | #####   | 0.5505 | 0.5945  | 0.725 | -6.41 | -0.4073 | none |
| PAX3          | 0.059  | 0.0549  | 0.5499 | 0.59488 | 0.725 | -6.41 | -0.7616 | none |
| ELOVL4        | -0.068 | -0.0804 | -0.55  | 0.59504 | 0.725 | -6.41 | 1.06922 | none |
| PLCB3         | 0.104  | 0.2032  | 0.5496 | 0.59506 | 0.725 | -6.41 | -0.2322 | none |
| ZNF625-ZNF626 | 0.077  | 0.0509  | 0.5492 | 0.59536 | 0.725 | -6.41 | 0.61378 | none |
| PIFO          | -0.049 | -0.0497 | -0.549 | 0.59549 | 0.726 | -6.41 | 0.04747 | none |
| BAMBI         | -0.04  | -0.0439 | -0.549 | 0.5955  | 0.726 | -6.41 | 0.38472 | none |
| PNRC1         | 0.075  | -0.0269 | 0.5488 | 0.5956  | 0.726 | -6.41 | 0.13872 | none |
| BHLHA9        | 0.039  | 0.0387  | 0.5488 | 0.59563 | 0.726 | -6.41 | 0.20016 | none |
| EGLN2         | -0.042 | 0.0014  | -0.549 | 0.59567 | 0.726 | -6.41 | 1.10974 | none |
| CSDC2         | -0.08  | -0.0884 | -0.548 | 0.59592 | 0.726 | -6.41 | -0.3203 | none |
| LRIT3         | 0.039  | 0.0261  | 0.5482 | 0.596   | 0.726 | -6.41 | 0       | none |
| CFAP46        | -0.097 | -0.0873 | -0.548 | 0.59609 | 0.726 | -6.41 | 1.95025 | none |
| SPRY2         | 0.041  | 0.0299  | 0.5481 | 0.5961  | 0.726 | -6.41 | -0.4393 | none |
| AGAP9         | -0.061 | -0.0171 | -0.548 | 0.59619 | 0.726 | -6.41 | 0.88322 | none |

|          |        |         |        |         |       |       |         |      |
|----------|--------|---------|--------|---------|-------|-------|---------|------|
| RBM28    | 0.129  | 0.2551  | 0.5477 | 0.59631 | 0.726 | -6.41 | 1.16326 | none |
| ECH1     | 0.053  | 0.0697  | 0.5477 | 0.59635 | 0.726 | -6.41 | -0.1184 | none |
| ATP6V1G3 | 0.05   | 0.0072  | 0.5473 | 0.59658 | 0.726 | -6.41 | 1.44766 | none |
| PDZRN3   | -0.1   | -0.0999 | -0.547 | 0.59661 | 0.726 | -6.41 | 0.05158 | none |
| XKR3     | 0.038  | 0.0386  | 0.5471 | 0.59672 | 0.726 | -6.41 | 0       | none |
| PSCA     | 0.046  | 0.0554  | 0.547  | 0.5968  | 0.726 | -6.41 | -0.321  | none |
| DEFA4    | -0.038 | -0.038  | -0.547 | 0.59699 | 0.727 | -6.41 | -0.0522 | none |
| SEMA5A   | 0.062  | 0.0208  | 0.5466 | 0.59706 | 0.727 | -6.41 | -0.702  | none |
| BCAS2    | -0.044 | -0.0505 | -0.547 | 0.59708 | 0.727 | -6.41 | 0.3495  | none |
| TMEM222  | -0.054 | -0.0352 | -0.546 | 0.59718 | 0.727 | -6.41 | 1.4368  | none |
| CST9     | -0.038 | -0.0262 | -0.546 | 0.59722 | 0.727 | -6.41 | 0       | none |
| LIMD2    | 0.066  | 0.0732  | 0.5462 | 0.5973  | 0.727 | -6.41 | 0.19892 | none |
| AGPAT4   | 0.071  | 0.0755  | 0.5462 | 0.59735 | 0.727 | -6.41 | 1.17786 | none |
| LSM8     | -0.125 | -0.1731 | -0.546 | 0.59751 | 0.727 | -6.41 | 1.02358 | none |
| ZNF768   | 0.07   | 0.1292  | 0.5458 | 0.59757 | 0.727 | -6.41 | 0.86419 | none |
| PRAMEF8  | 0.038  | 0.0386  | 0.5457 | 0.59764 | 0.727 | -6.41 | 0       | none |
| ANLN     | 0.156  | 0.3295  | 0.5455 | 0.59781 | 0.727 | -6.41 | 0.73903 | none |
| LGALS3   | -0.092 | -0.18   | -0.545 | 0.59818 | 0.727 | -6.42 | 1.02702 | none |
| KIAA2013 | -0.082 | -0.0624 | -0.545 | 0.59821 | 0.727 | -6.42 | -0.2427 | none |
| ZNF235   | 0.11   | 0.0679  | 0.5445 | 0.59844 | 0.728 | -6.42 | -0.4391 | none |
| RLBP1    | -0.075 | -0.0571 | -0.544 | 0.59849 | 0.728 | -6.42 | -0.0267 | none |
| FAM110A  | 0.072  | 0.0296  | 0.5444 | 0.59852 | 0.728 | -6.42 | 0.48327 | none |
| PLPPR3   | 0.105  | 0.1002  | 0.544  | 0.59879 | 0.728 | -6.42 | 0.36784 | none |
| TMEM254  | -0.069 | -0.1727 | -0.544 | 0.59883 | 0.728 | -6.42 | 0.61781 | none |
| TPGS2    | -0.063 | -0.0526 | -0.544 | 0.59904 | 0.728 | -6.42 | 0.66671 | none |
| P2RY1    | 0.042  | 0.0564  | 0.5433 | 0.59921 | 0.728 | -6.42 | 0.39563 | none |
| UHMK1    | 0.079  | -0.0264 | 0.5433 | 0.59922 | 0.728 | -6.42 | 1.07828 | none |
| ATP6V0A4 | 0.152  | 0.0542  | 0.5433 | 0.59922 | 0.728 | -6.42 | -0.2773 | none |
| PREB     | 0.059  | 0.0215  | 0.5433 | 0.59925 | 0.728 | -6.42 | 1.15515 | none |
| PSMD4    | 0.051  | 0.0455  | 0.5432 | 0.59931 | 0.728 | -6.42 | -0.8701 | none |
| TAGAP    | 0.07   | 0.0254  | 0.5431 | 0.59936 | 0.728 | -6.42 | 0.39681 | none |
| SESN1    | 0.075  | 0.0423  | 0.543  | 0.59944 | 0.728 | -6.42 | 0.78972 | none |
| GH1      | 0.04   | 0.038   | 0.5428 | 0.59961 | 0.728 | -6.42 | -0.1976 | none |
| LIMCH1   | 0.054  | 0.0519  | 0.5425 | 0.59977 | 0.728 | -6.42 | -0.1492 | none |
| TRPV4    | 0.052  | 0.0644  | 0.5425 | 0.5998  | 0.728 | -6.42 | -0.8484 | none |
| SPZ1     | 0.038  | 0.0381  | 0.5423 | 0.59993 | 0.729 | -6.42 | -0.9277 | none |
| SON      | 0.14   | 0.2536  | 0.542  | 0.60013 | 0.729 | -6.42 | -0.1323 | none |
| NLRP5    | 0.09   | 0.0513  | 0.5417 | 0.60033 | 0.729 | -6.42 | 0.60867 | none |
| POLDIP3  | 0.048  | 0.0532  | 0.5416 | 0.60038 | 0.729 | -6.42 | 1.24716 | none |
| ACACA    | 0.087  | 0.1188  | 0.5416 | 0.6004  | 0.729 | -6.42 | -0.2958 | none |

|          |        |         |        |         |       |       |         |      |
|----------|--------|---------|--------|---------|-------|-------|---------|------|
| CD5L     | 0.041  | 0.0521  | 0.5413 | 0.60055 | 0.729 | -6.42 | 1.84921 | none |
| ENOX1    | -0.048 | -0.0425 | -0.541 | 0.6006  | 0.729 | -6.42 | 0.53781 | none |
| RNF141   | -0.066 | -0.1089 | -0.541 | 0.60102 | 0.73  | -6.42 | 0.65662 | none |
| PSMG1    | -0.051 | -0.1135 | -0.54  | 0.60122 | 0.73  | -6.42 | 0.55057 | none |
| YJEFN3   | 0.068  | 0.1141  | 0.5402 | 0.60132 | 0.73  | -6.42 | -0.3477 | none |
| C1ORF115 | 0.039  | 0.0438  | 0.5401 | 0.60139 | 0.73  | -6.42 | 0.55665 | none |
| XYLT1    | 0.057  | 0.1114  | 0.5399 | 0.60149 | 0.73  | -6.42 | 0.70994 | none |
| FAM53A   | -0.036 | -0.0231 | -0.54  | 0.60164 | 0.73  | -6.42 | 1.14919 | none |
| LATS2    | 0.051  | 0.1006  | 0.5393 | 0.60187 | 0.73  | -6.42 | -0.8133 | none |
| ZNF728   | -0.036 | -0.0157 | -0.539 | 0.60195 | 0.73  | -6.42 | 0.84376 | none |
| OVOL2    | -0.049 | -0.0208 | -0.539 | 0.60224 | 0.731 | -6.42 | -0.4903 | none |
| NOL7     | -0.053 | 0.0044  | -0.539 | 0.60234 | 0.731 | -6.42 | 1.18311 | none |
| OR5J2    | -0.037 | -0.0373 | -0.539 | 0.60235 | 0.731 | -6.42 | -0.2977 | none |
| OR6C70   | -0.037 | -0.0373 | -0.539 | 0.60235 | 0.731 | -6.42 | -0.5817 | none |
| CCL21    | 0.038  | 0.0378  | 0.5385 | 0.60246 | 0.731 | -6.42 | -0.8467 | none |
| AC233755 | 0.045  | 0.0594  | 0.5382 | 0.60265 | 0.731 | -6.42 | 1.19517 | none |
| PRRX1    | -0.062 | -0.0535 | -0.538 | 0.60266 | 0.731 | -6.42 | 0.87027 | none |
| IGHMBP2  | 0.112  | 0.2149  | 0.5378 | 0.60291 | 0.731 | -6.42 | 1.03565 | none |
| CCDC18   | 0.135  | 0.213   | 0.5375 | 0.60308 | 0.731 | -6.42 | 0.76354 | none |
| TEX13A   | 0.038  | 0.0377  | 0.5372 | 0.60327 | 0.731 | -6.42 | 0       | none |
| KLHDC2   | 0.059  | -0.0227 | 0.537  | 0.60345 | 0.731 | -6.42 | 0.9949  | none |
| ACSM1    | -0.037 | -0.0396 | -0.537 | 0.60346 | 0.731 | -6.42 | -0.0859 | none |
| APOB     | 0.054  | 0.0172  | 0.5369 | 0.60346 | 0.731 | -6.42 | -0.2766 | none |
| BRD9     | 0.065  | 0.1298  | 0.5359 | 0.60412 | 0.732 | -6.42 | 0.4818  | none |
| URGCP    | 0.116  | 0.2224  | 0.5359 | 0.60414 | 0.732 | -6.42 | 0.63763 | none |
| ZNF385B  | -0.058 | -0.0239 | -0.536 | 0.60416 | 0.732 | -6.42 | 0.65805 | none |
| METTL24  | -0.048 | -0.0305 | -0.536 | 0.60433 | 0.732 | -6.42 | -0.559  | none |
| CCDC138  | 0.065  | 0.086   | 0.5356 | 0.60436 | 0.732 | -6.42 | 0.38688 | none |
| ZDHHC11  | 0.112  | 0.1557  | 0.5354 | 0.6045  | 0.732 | -6.42 | 1.00466 | none |
| RPH3AL   | 0.129  | 0.0385  | 0.5353 | 0.60458 | 0.732 | -6.42 | -0.4423 | none |
| H1FNT    | 0.064  | 0.0794  | 0.535  | 0.60475 | 0.733 | -6.42 | 0.97052 | none |
| RTN4R    | 0.094  | 0.0339  | 0.5348 | 0.60491 | 0.733 | -6.42 | 0.07208 | none |
| BIRC2    | 0.063  | 0.0219  | 0.5347 | 0.60493 | 0.733 | -6.42 | 0.58682 | none |
| ZNF830   | 0.082  | 0.0991  | 0.5347 | 0.60493 | 0.733 | -6.42 | 0.9556  | none |
| DEPTOR   | -0.043 | -0.0305 | -0.535 | 0.60504 | 0.733 | -6.42 | 0.72538 | none |
| NCBP2L   | 0.037  | 0.0377  | 0.5344 | 0.60518 | 0.733 | -6.42 | 0.72753 | none |
| GRIK5    | -0.039 | -0.0168 | -0.534 | 0.60525 | 0.733 | -6.42 | 1.60311 | none |
| ARL2BP   | 0.087  | 0.0191  | 0.5338 | 0.60552 | 0.733 | -6.42 | 0.22917 | none |
| TEAD1    | -0.04  | -0.0349 | -0.533 | 0.60588 | 0.733 | -6.42 | -0.3773 | none |
| FGFBP1   | 0.037  | 0.0373  | 0.5333 | 0.60589 | 0.733 | -6.42 | 0       | none |



|           |        |         |        |         |       |       |         |      |
|-----------|--------|---------|--------|---------|-------|-------|---------|------|
| FMOD      | -0.048 | -0.0656 | -0.533 | 0.60592 | 0.733 | -6.42 | 0.04663 | none |
| MED9      | 0.046  | 0.0284  | 0.5331 | 0.606   | 0.734 | -6.42 | -0.2655 | none |
| OR2B6     | 0.037  | 0.0384  | 0.5331 | 0.60604 | 0.734 | -6.42 | 0       | none |
| GEMIN7    | 0.051  | -0.0013 | 0.5329 | 0.60617 | 0.734 | -6.42 | -0.8237 | none |
| GPR101    | 0.038  | 0.04    | 0.5327 | 0.60626 | 0.734 | -6.42 | -0.2757 | none |
| RIMKLB    | -0.133 | -0.1335 | -0.533 | 0.6063  | 0.734 | -6.42 | 1.03314 | none |
| TADA3     | 0.082  | 0.1044  | 0.5325 | 0.60642 | 0.734 | -6.42 | -0.0551 | none |
| SPOCK2    | -0.081 | -0.0233 | -0.532 | 0.60705 | 0.734 | -6.42 | 0.93197 | none |
| UGT1A6    | -0.055 | -0.0576 | -0.532 | 0.60706 | 0.734 | -6.42 | 1.20406 | none |
| BTBD17    | 0.037  | 0.0372  | 0.5313 | 0.60719 | 0.735 | -6.42 | -0.3669 | none |
| C7ORF25   | 0.124  | 0.0562  | 0.5313 | 0.60725 | 0.735 | -6.42 | -0.5162 | none |
| SORBS1    | 0.092  | 0.0824  | 0.5309 | 0.60748 | 0.735 | -6.42 | 0.04286 | none |
| SUCLG2    | -0.051 | -0.0429 | -0.531 | 0.60754 | 0.735 | -6.42 | 0.93453 | none |
| MOS       | 0.037  | 0.0371  | 0.5308 | 0.60757 | 0.735 | -6.42 | -0.5995 | none |
| LMAN2     | -0.066 | -0.0623 | -0.53  | 0.60778 | 0.735 | -6.42 | -0.2463 | none |
| GP5       | 0.039  | 0.0408  | 0.5299 | 0.60814 | 0.735 | -6.42 | 0.97646 | none |
| SLC25A35  | -0.17  | -0.1086 | -0.529 | 0.60852 | 0.736 | -6.42 | 0.94345 | none |
| ZFP92     | 0.053  | 0.0938  | 0.5292 | 0.60864 | 0.736 | -6.42 | -0.156  | none |
| YBEY      | -0.071 | -0.1511 | -0.529 | 0.60865 | 0.736 | -6.42 | 0.35093 | none |
| CYBB      | -0.037 | -0.0463 | -0.529 | 0.60884 | 0.736 | -6.42 | 0       | none |
| OR2G2     | -0.036 | -0.0365 | -0.529 | 0.60887 | 0.736 | -6.42 | 0       | none |
| SEMA3E    | -0.212 | -0.1506 | -0.529 | 0.60899 | 0.736 | -6.42 | 1.58348 | none |
| SOWAHD    | 0.04   | 0.0403  | 0.5284 | 0.60913 | 0.736 | -6.42 | -0.2449 | none |
| KRTAP10-8 | 0.043  | 0.015   | 0.5284 | 0.60914 | 0.736 | -6.42 | 1.06669 | none |
| RAB1A     | -0.069 | -0.1286 | -0.528 | 0.60924 | 0.736 | -6.42 | 0.91938 | none |
| OR51H1    | -0.036 | -0.0364 | -0.528 | 0.60931 | 0.736 | -6.42 | 0       | none |
| TCEAL6    | 0.037  | 0.0369  | 0.528  | 0.60944 | 0.736 | -6.42 | -0.1349 | none |
| BFAR      | 0.097  | 0.0176  | 0.5279 | 0.6095  | 0.736 | -6.42 | 0.36482 | none |
| GMPPA     | -0.062 | -0.0711 | -0.528 | 0.60957 | 0.736 | -6.42 | 0.08398 | none |
| TTYH3     | -0.07  | 0.0188  | -0.528 | 0.60969 | 0.737 | -6.42 | 0.97457 | none |
| KRTAP4-5  | 0.037  | 0.0368  | 0.5273 | 0.60987 | 0.737 | -6.42 | 1.61682 | none |
| OGFR      | 0.095  | 0.2171  | 0.5273 | 0.60987 | 0.737 | -6.42 | 0.20554 | none |
| GMPPB     | 0.067  | 0.049   | 0.5273 | 0.6099  | 0.737 | -6.42 | 1.03064 | none |
| C17ORF47  | -0.037 | -0.022  | -0.527 | 0.61015 | 0.737 | -6.43 | 0       | none |
| EPHA8     | -0.037 | -0.019  | -0.527 | 0.6102  | 0.737 | -6.43 | 1.31985 | none |
| CATSPER4  | 0.034  | 0.04    | 0.5268 | 0.61023 | 0.737 | -6.43 | -0.2432 | none |
| ATP6V0D1  | -0.065 | -0.1319 | -0.527 | 0.61026 | 0.737 | -6.43 | 1.15616 | none |
| GATA3     | 0.073  | 0.0919  | 0.5261 | 0.61066 | 0.737 | -6.43 | 0.25681 | none |
| DNASE1L2  | -0.038 | -0.0033 | -0.526 | 0.61071 | 0.737 | -6.43 | 0.20117 | none |
| KLK4      | 0.056  | 0.0797  | 0.5259 | 0.61086 | 0.737 | -6.43 | 0.99901 | none |

|           |        |         |        |         |       |       |         |      |
|-----------|--------|---------|--------|---------|-------|-------|---------|------|
| CCDC173   | 0.042  | 0.0608  | 0.5257 | 0.61097 | 0.737 | -6.43 | 0.75282 | none |
| CHKB-CPT  | 0.117  | 0.0789  | 0.5256 | 0.61105 | 0.738 | -6.43 | -0.0372 | none |
| TMEM234   | -0.096 | -0.0074 | -0.525 | 0.61123 | 0.738 | -6.43 | 0.97226 | none |
| CGB3      | 0.075  | 0.0816  | 0.5252 | 0.6113  | 0.738 | -6.43 | -0.5962 | none |
| RNF187    | 0.045  | 0.0465  | 0.5251 | 0.61136 | 0.738 | -6.43 | 0.51516 | none |
| ARSH      | 0.037  | 0.0366  | 0.5249 | 0.61147 | 0.738 | -6.43 | 0       | none |
| SFRP1     | 0.038  | 0.0487  | 0.5246 | 0.61171 | 0.738 | -6.43 | 0       | none |
| PIK3R4    | -0.082 | 0.0452  | -0.525 | 0.61175 | 0.738 | -6.43 | 1.83515 | none |
| MT-CO2    | 0.053  | 0.0647  | 0.5245 | 0.61175 | 0.738 | -6.43 | 0.47333 | none |
| MARVELD   | -0.072 | -0.0296 | -0.524 | 0.61221 | 0.739 | -6.43 | -0.2336 | none |
| COL6A6    | 0.038  | 0.0385  | 0.5234 | 0.61248 | 0.739 | -6.43 | 0.91899 | none |
| ZSWIM5    | 0.069  | 0.0818  | 0.5233 | 0.61259 | 0.739 | -6.43 | 1.26255 | none |
| CCDC126   | -0.092 | -0.1297 | -0.523 | 0.6126  | 0.739 | -6.43 | -0.3819 | none |
| CD200R1   | 0.045  | 0.004   | 0.5231 | 0.61271 | 0.739 | -6.43 | 0.90692 | none |
| HSD3B1    | 0.091  | 0.1182  | 0.523  | 0.6128  | 0.739 | -6.43 | 1.48764 | none |
| TCF7L2    | -0.175 | -0.1372 | -0.523 | 0.61283 | 0.739 | -6.43 | 0.46187 | none |
| RGSL1     | 0.095  | 0.1239  | 0.5227 | 0.61296 | 0.739 | -6.43 | 0.99497 | none |
| PTGER3    | -0.056 | -0.0845 | -0.523 | 0.613   | 0.739 | -6.43 | 0.47129 | none |
| ZNF469    | 0.035  | 0.0576  | 0.5225 | 0.61309 | 0.739 | -6.43 | -0.0051 | none |
| KRT82     | 0.035  | 0.0411  | 0.5221 | 0.61339 | 0.739 | -6.43 | 0       | none |
| AC104389  | 0.036  | 0.0363  | 0.5217 | 0.61362 | 0.74  | -6.43 | 0       | none |
| BIN3      | -0.071 | -0.0172 | -0.522 | 0.61374 | 0.74  | -6.43 | 1.40544 | none |
| SRRM4     | 0.138  | 0.1169  | 0.5211 | 0.61402 | 0.74  | -6.43 | -0.0022 | none |
| HLA-B     | -0.059 | -0.1202 | -0.521 | 0.61408 | 0.74  | -6.43 | 0.49025 | none |
| OR51T1    | -0.036 | -0.0358 | -0.52  | 0.61452 | 0.74  | -6.43 | 0       | none |
| GP9       | 0.036  | 0.0362  | 0.5204 | 0.61453 | 0.74  | -6.43 | -0.6649 | none |
| LEXM      | -0.039 | -0.0444 | -0.52  | 0.61461 | 0.74  | -6.43 | 1.97131 | none |
| EOMES     | 0.042  | 0.0487  | 0.5202 | 0.61462 | 0.74  | -6.43 | 0.83261 | none |
| OR52E8    | 0.036  | 0.0362  | 0.52   | 0.61479 | 0.741 | -6.43 | 0       | none |
| CCDC17    | -0.09  | 0.0153  | -0.52  | 0.61485 | 0.741 | -6.43 | 1.70873 | none |
| UTS2      | -0.113 | -0.0989 | -0.52  | 0.61485 | 0.741 | -6.43 | 0.89973 | none |
| ZFP91-CN1 | 0.091  | 0.1963  | 0.5197 | 0.61501 | 0.741 | -6.43 | 0.0707  | none |
| CST8      | 0.036  | 0.0361  | 0.5196 | 0.61502 | 0.741 | -6.43 | 0       | none |
| CLEC18B   | 0.121  | 0.1092  | 0.5195 | 0.6151  | 0.741 | -6.43 | 0.99591 | none |
| WDFY1     | 0.051  | 0.1215  | 0.5193 | 0.61525 | 0.741 | -6.43 | 0.60936 | none |
| FOXD4L3   | -0.034 | -0.0116 | -0.519 | 0.61528 | 0.741 | -6.43 | 0       | none |
| KLHL29    | -0.035 | -0.0226 | -0.519 | 0.61541 | 0.741 | -6.43 | 0       | none |
| ITGA8     | -0.072 | -0.0648 | -0.519 | 0.61549 | 0.741 | -6.43 | 1.33749 | none |
| SIGLEC7   | 0.083  | 0.033   | 0.5189 | 0.6155  | 0.741 | -6.43 | 0.89368 | none |
| NEU1      | -0.102 | -0.1368 | -0.519 | 0.61551 | 0.741 | -6.43 | 0.19437 | none |

|           |        |         |        |         |       |       |         |      |
|-----------|--------|---------|--------|---------|-------|-------|---------|------|
| GAS2      | -0.072 | -0.0474 | -0.519 | 0.61557 | 0.741 | -6.43 | -0.1346 | none |
| UCKL1     | 0.053  | 0.0473  | 0.5188 | 0.61559 | 0.741 | -6.43 | 0.355   | none |
| IL12RB2   | 0.11   | 0.1863  | 0.5188 | 0.6156  | 0.741 | -6.43 | -0.0532 | none |
| C15ORF65  | -0.051 | 0.0116  | -0.518 | 0.61613 | 0.741 | -6.43 | 0.60808 | none |
| CT45A2    | 0.036  | 0.036   | 0.5175 | 0.61648 | 0.742 | -6.43 | 1.26503 | none |
| TRIM44    | -0.09  | 0.0249  | -0.517 | 0.61648 | 0.742 | -6.43 | 1.00697 | none |
| PISD      | 0.044  | 0.0922  | 0.5174 | 0.6165  | 0.742 | -6.43 | -0.0582 | none |
| AP2M1     | -0.054 | 0.0107  | -0.517 | 0.61654 | 0.742 | -6.43 | 1.43168 | none |
| IMMP1L    | 0.065  | -0.0779 | 0.5173 | 0.6166  | 0.742 | -6.43 | -0.2789 | none |
| TGFB3     | 0.096  | 0.1011  | 0.5173 | 0.61661 | 0.742 | -6.43 | 0.81479 | none |
| LMNB2     | 0.096  | 0.2022  | 0.5172 | 0.61668 | 0.742 | -6.43 | 0.32229 | none |
| VIP       | 0.041  | 0.0564  | 0.5169 | 0.61687 | 0.742 | -6.43 | -0.0049 | none |
| RIPPLY1   | -0.04  | -0.0146 | -0.517 | 0.61702 | 0.742 | -6.43 | -0.3799 | none |
| ATP6V1G1  | -0.058 | -0.1414 | -0.517 | 0.61706 | 0.742 | -6.43 | -0.3164 | none |
| GATA4     | 0.053  | 0.0534  | 0.5164 | 0.61721 | 0.742 | -6.43 | -0.1723 | none |
| ARNTL     | 0.056  | 0.0704  | 0.5161 | 0.61739 | 0.742 | -6.43 | 0.94594 | none |
| PRTN3     | 0.038  | 0.0486  | 0.516  | 0.61747 | 0.742 | -6.43 | 1.65452 | none |
| LSMEM1    | 0.084  | 0.0651  | 0.5159 | 0.61752 | 0.742 | -6.43 | 0.56936 | none |
| DEGS2     | 0.058  | 0.0522  | 0.5159 | 0.61752 | 0.742 | -6.43 | 1.74492 | none |
| RAB11FIP5 | -0.047 | -0.0074 | -0.516 | 0.61757 | 0.742 | -6.43 | 0.98603 | none |
| TRAK1     | 0.109  | 0.2531  | 0.5157 | 0.61764 | 0.742 | -6.43 | -0.2138 | none |
| CLUH      | 0.129  | 0.2905  | 0.5156 | 0.61772 | 0.742 | -6.43 | -0.2249 | none |
| TRAPPC13  | -0.082 | -0.0534 | -0.516 | 0.61779 | 0.742 | -6.43 | 1.26043 | none |
| AANAT     | 0.083  | 0.0342  | 0.5148 | 0.61829 | 0.743 | -6.43 | -0.1393 | none |
| WNT11     | 0.103  | 0.121   | 0.5147 | 0.61831 | 0.743 | -6.43 | 0.63143 | none |
| LRIG1     | 0.105  | 0.2752  | 0.5147 | 0.61833 | 0.743 | -6.43 | 0.11528 | none |
| ANP32D    | 0.036  | 0.0357  | 0.5147 | 0.61834 | 0.743 | -6.43 | 0.46363 | none |
| SLC10A4   | 0.043  | 0.0582  | 0.5147 | 0.61836 | 0.743 | -6.43 | -0.601  | none |
| MPV17     | 0.064  | -0.02   | 0.5145 | 0.61849 | 0.743 | -6.43 | 0.02488 | none |
| IL19      | -0.039 | -0.0503 | -0.514 | 0.61855 | 0.743 | -6.43 | 1.2551  | none |
| IFNA4     | -0.035 | -0.0352 | -0.514 | 0.61874 | 0.743 | -6.43 | 0       | none |
| FETUB     | 0.036  | 0.0356  | 0.5134 | 0.61924 | 0.744 | -6.43 | -0.7372 | none |
| RS1       | 0.05   | 0.0502  | 0.5133 | 0.61925 | 0.744 | -6.43 | -0.0707 | none |
| OR13C4    | 0.036  | 0.0356  | 0.5133 | 0.61931 | 0.744 | -6.43 | 0       | none |
| ARL8B     | -0.052 | -0.0733 | -0.513 | 0.6195  | 0.744 | -6.43 | 0.68595 | none |
| DACT2     | 0.035  | 0.0178  | 0.5129 | 0.61956 | 0.744 | -6.43 | 0.52905 | none |
| TIMMDC1   | -0.048 | -0.1064 | -0.513 | 0.61973 | 0.744 | -6.43 | 0.21846 | none |
| ATP2B2    | 0.035  | 0.0363  | 0.5124 | 0.61988 | 0.744 | -6.43 | -0.0794 | none |
| ATAD3A    | 0.074  | 0.1726  | 0.5123 | 0.61993 | 0.744 | -6.43 | 0.01303 | none |
| SLA       | 0.09   | 0.1864  | 0.5123 | 0.61995 | 0.744 | -6.43 | -0.4948 | none |

|          |        |         |        |         |       |       |         |      |
|----------|--------|---------|--------|---------|-------|-------|---------|------|
| CCDC181  | 0.038  | 0.0465  | 0.5123 | 0.61996 | 0.744 | -6.43 | 0.32171 | none |
| MADCAM:  | 0.04   | 0.0589  | 0.5121 | 0.62006 | 0.744 | -6.43 | 0.73885 | none |
| MSANTD3  | 0.046  | 0.0541  | 0.5117 | 0.62038 | 0.744 | -6.43 | 1.25279 | none |
| AMPH     | -0.122 | -0.1271 | -0.512 | 0.62039 | 0.744 | -6.43 | 0.75205 | none |
| GRSF1    | -0.049 | -0.051  | -0.512 | 0.62045 | 0.744 | -6.43 | 1.16584 | none |
| ARMCX1   | -0.063 | -0.0388 | -0.511 | 0.62052 | 0.745 | -6.43 | 1.3525  | none |
| SAT2     | -0.076 | -0.112  | -0.511 | 0.62067 | 0.745 | -6.43 | 0.61906 | none |
| RERGL    | -0.039 | -0.023  | -0.511 | 0.62086 | 0.745 | -6.43 | 1.59989 | none |
| ZNF518A  | -0.118 | 0.0048  | -0.511 | 0.62103 | 0.745 | -6.43 | 0.78889 | none |
| GALNT13  | 0.059  | 0.0447  | 0.5107 | 0.62103 | 0.745 | -6.43 | -0.5707 | none |
| ZBTB7A   | 0.113  | 0.269   | 0.5104 | 0.62121 | 0.745 | -6.43 | 0.67358 | none |
| LRRC26   | 0.041  | 0.0273  | 0.51   | 0.62154 | 0.745 | -6.43 | 0.52775 | none |
| CP       | -0.076 | -0.1098 | -0.51  | 0.62162 | 0.745 | -6.43 | 0.24027 | none |
| UNC119B  | 0.069  | 0.0677  | 0.5097 | 0.62174 | 0.746 | -6.43 | 0.12751 | none |
| OR13H1   | 0.035  | 0.0353  | 0.5096 | 0.62179 | 0.746 | -6.43 | 0       | none |
| OR1K1    | 0.04   | 0.0144  | 0.5096 | 0.6218  | 0.746 | -6.43 | 1.08183 | none |
| FASTKD5  | -0.035 | -0.0396 | -0.509 | 0.62206 | 0.746 | -6.43 | 1.08037 | none |
| CACNA1C  | -0.048 | -0.0355 | -0.509 | 0.62216 | 0.746 | -6.43 | 1.84687 | none |
| SLC39A4  | 0.05   | 0.0446  | 0.509  | 0.62216 | 0.746 | -6.43 | -0.2898 | none |
| DDX39B   | -0.069 | -0.0706 | -0.509 | 0.62223 | 0.746 | -6.43 | 1.82217 | none |
| IL36RN   | 0.076  | 0.0884  | 0.5088 | 0.62229 | 0.746 | -6.43 | 0.55974 | none |
| PPP1R1C  | 0.099  | 0.1178  | 0.5086 | 0.62243 | 0.746 | -6.44 | 0.21546 | none |
| FHL3     | 0.056  | 0.1297  | 0.5085 | 0.62249 | 0.746 | -6.44 | 0.6623  | none |
| CHST7    | 0.062  | 0.0753  | 0.5084 | 0.62259 | 0.746 | -6.44 | 0.50134 | none |
| FAM155B  | 0.037  | 0.0609  | 0.5084 | 0.62262 | 0.746 | -6.44 | 0       | none |
| DVL1     | -0.099 | -0.0167 | -0.508 | 0.6227  | 0.746 | -6.44 | 0.8132  | none |
| HCN2     | -0.034 | -0.0207 | -0.508 | 0.62293 | 0.746 | -6.44 | 0       | none |
| DYRK4    | -0.068 | -0.1408 | -0.508 | 0.62302 | 0.746 | -6.44 | 0.75495 | none |
| CD79A    | -0.058 | -0.0495 | -0.508 | 0.62304 | 0.746 | -6.44 | 0.59002 | none |
| MMP26    | -0.035 | -0.0347 | -0.507 | 0.6232  | 0.746 | -6.44 | 0       | none |
| OPN1SW   | 0.05   | 0.0534  | 0.5075 | 0.62321 | 0.746 | -6.44 | -0.7332 | none |
| CDH19    | 0.047  | 0.0376  | 0.5067 | 0.62377 | 0.747 | -6.44 | 0.22565 | none |
| DDX49    | 0.072  | 0.1473  | 0.5064 | 0.62397 | 0.747 | -6.44 | 0.38115 | none |
| CBWD1    | 0.058  | #####   | 0.5063 | 0.62401 | 0.747 | -6.44 | -0.5501 | none |
| TNFSF10  | -0.073 | -0.0767 | -0.506 | 0.62404 | 0.747 | -6.44 | -0.3645 | none |
| ATP6V1E2 | -0.11  | -0.0456 | -0.506 | 0.62405 | 0.747 | -6.44 | 0.87381 | none |
| ZMYND15  | 0.044  | 0.035   | 0.5062 | 0.62406 | 0.747 | -6.44 | 1.36899 | none |
| ZC4H2    | 0.087  | 0.0162  | 0.5061 | 0.62414 | 0.747 | -6.44 | 0.17012 | none |
| HIST2H3D | -0.12  | -0.1344 | -0.506 | 0.62424 | 0.747 | -6.44 | 1.71303 | none |
| IGF2BP2  | 0.077  | 0.0739  | 0.5057 | 0.62439 | 0.747 | -6.44 | 1.71896 | none |

|          |        |         |        |         |       |       |         |      |
|----------|--------|---------|--------|---------|-------|-------|---------|------|
| UCN3     | -0.035 | -0.0345 | -0.506 | 0.62441 | 0.747 | -6.44 | 0       | none |
| MYO3A    | 0.043  | 0.0447  | 0.5056 | 0.62445 | 0.747 | -6.44 | 0.44406 | none |
| C1QC     | 0.035  | 0.0349  | 0.5055 | 0.62453 | 0.747 | -6.44 | -0.6576 | none |
| TTR      | 0.103  | 0.0452  | 0.5052 | 0.62478 | 0.748 | -6.44 | -0.5152 | none |
| CCDC43   | -0.058 | -0.0395 | -0.505 | 0.62509 | 0.748 | -6.44 | 0.71001 | none |
| PXDNL    | -0.037 | -0.0189 | -0.505 | 0.62512 | 0.748 | -6.44 | 0.62377 | none |
| KCNF1    | 0.038  | 0.0462  | 0.5046 | 0.62513 | 0.748 | -6.44 | -0.1667 | none |
| SC5D     | 0.093  | 0.0225  | 0.5045 | 0.62522 | 0.748 | -6.44 | 0.81625 | none |
| CRHBP    | -0.102 | -0.0758 | -0.504 | 0.62526 | 0.748 | -6.44 | 0.1097  | none |
| KY       | 0.057  | 0.0629  | 0.5043 | 0.62538 | 0.748 | -6.44 | 0.87267 | none |
| ATG5     | -0.047 | -0.069  | -0.504 | 0.62549 | 0.748 | -6.44 | 1.61267 | none |
| PSMB11   | -0.034 | -0.016  | -0.504 | 0.62559 | 0.748 | -6.44 | 1.82105 | none |
| COL8A2   | -0.035 | -0.0268 | -0.504 | 0.62562 | 0.748 | -6.44 | 0       | none |
| SBSN     | 0.08   | 0.0796  | 0.5037 | 0.62579 | 0.748 | -6.44 | 0.43345 | none |
| MRPS21   | -0.063 | -0.1139 | -0.504 | 0.62587 | 0.748 | -6.44 | 0.37886 | none |
| PIGV     | -0.073 | -0.1212 | -0.503 | 0.62592 | 0.748 | -6.44 | 1.73766 | none |
| FRS2     | 0.06   | 0.0548  | 0.5035 | 0.62592 | 0.748 | -6.44 | 1.51107 | none |
| POU3F1   | -0.034 | -0.0148 | -0.503 | 0.62593 | 0.748 | -6.44 | 0.54825 | none |
| RBM18    | -0.101 | -0.1276 | -0.503 | 0.62617 | 0.748 | -6.44 | 1.5969  | none |
| C17ORF10 | 0.079  | 0.0147  | 0.503  | 0.62627 | 0.749 | -6.44 | -0.3112 | none |
| ZC2HC1B  | -0.037 | -0.0077 | -0.503 | 0.62644 | 0.749 | -6.44 | -0.2141 | none |
| GSC2     | 0.035  | 0.0274  | 0.5027 | 0.62647 | 0.749 | -6.44 | 0.19512 | none |
| DUSP1    | -0.061 | -0.0669 | -0.503 | 0.62647 | 0.749 | -6.44 | 0.24976 | none |
| OR2A42   | -0.035 | -0.0187 | -0.502 | 0.62706 | 0.749 | -6.44 | 0.98324 | none |
| EPHA3    | 0.036  | 0.0298  | 0.5017 | 0.62713 | 0.749 | -6.44 | 0.37349 | none |
| CEBPD    | -0.037 | -0.0446 | -0.501 | 0.62739 | 0.75  | -6.44 | 1.12509 | none |
| FAM107B  | 0.047  | #####   | 0.5012 | 0.62745 | 0.75  | -6.44 | 0.037   | none |
| MIDN     | 0.088  | 0.1425  | 0.5011 | 0.6275  | 0.75  | -6.44 | -0.0202 | none |
| OSCP1    | 0.127  | 0.0306  | 0.5006 | 0.62784 | 0.75  | -6.44 | 0.86031 | none |
| EIF4A3   | -0.045 | -0.0194 | -0.501 | 0.62785 | 0.75  | -6.44 | 1.71553 | none |
| TMPRSS6  | 0.085  | 0.1037  | 0.5004 | 0.62797 | 0.75  | -6.44 | 0.42319 | none |
| ST13     | -0.047 | -0.0154 | -0.5   | 0.628   | 0.75  | -6.44 | 1.02332 | none |
| RNASE1   | -0.064 | -0.064  | -0.5   | 0.62826 | 0.75  | -6.44 | 0.70485 | none |
| 4-Sep    | 0.097  | 0.0484  | 0.4999 | 0.62833 | 0.75  | -6.44 | -0.5616 | none |
| EPDR1    | -0.057 | -0.0548 | -0.5   | 0.62833 | 0.75  | -6.44 | 0.01656 | none |
| OR6Q1    | -0.034 | -0.0341 | -0.5   | 0.62844 | 0.75  | -6.44 | 0       | none |
| PCID2    | -0.049 | -0.0993 | -0.5   | 0.62851 | 0.75  | -6.44 | 0.29484 | none |
| IAH1     | -0.067 | -0.1395 | -0.5   | 0.62859 | 0.75  | -6.44 | 0.6149  | none |
| MCRS1    | 0.061  | 0.0392  | 0.4992 | 0.6288  | 0.751 | -6.44 | 0.54249 | none |
| EIF3I    | -0.037 | -0.0833 | -0.499 | 0.62896 | 0.751 | -6.44 | 0.46827 | none |

|          |        |         |        |         |       |       |         |      |
|----------|--------|---------|--------|---------|-------|-------|---------|------|
| THSD4    | 0.058  | 0.0173  | 0.4984 | 0.62937 | 0.751 | -6.44 | -0.5852 | none |
| FDX1     | -0.089 | -0.1181 | -0.498 | 0.62943 | 0.751 | -6.44 | 0.99139 | none |
| ICAM5    | 0.043  | 0.0625  | 0.4982 | 0.62953 | 0.751 | -6.44 | 0.60176 | none |
| ELAVL4   | -0.04  | -0.0404 | -0.498 | 0.62953 | 0.751 | -6.44 | 0.34731 | none |
| MRM2     | 0.05   | 0.1086  | 0.498  | 0.62964 | 0.751 | -6.44 | 0.9228  | none |
| ZNF77    | 0.069  | 0.0589  | 0.4977 | 0.62983 | 0.751 | -6.44 | -0.3642 | none |
| CMPK2    | -0.054 | -0.0735 | -0.498 | 0.6299  | 0.751 | -6.44 | 0.24293 | none |
| ST6GALNA | 0.062  | -0.0438 | 0.4974 | 0.63002 | 0.752 | -6.44 | 0.93741 | none |
| NR4A1    | 0.056  | 0.1142  | 0.497  | 0.63029 | 0.752 | -6.44 | 0.17298 | none |
| ADCY5    | -0.095 | -0.0584 | -0.497 | 0.63043 | 0.752 | -6.44 | 1.17116 | none |
| MTMR11   | 0.066  | 0.0193  | 0.4966 | 0.63059 | 0.752 | -6.44 | 1.19734 | none |
| SRP9     | -0.078 | -0.1431 | -0.497 | 0.63062 | 0.752 | -6.44 | 0.18321 | none |
| SNN      | 0.042  | 0.0241  | 0.4964 | 0.63069 | 0.752 | -6.44 | 0.06947 | none |
| ICE2     | 0.088  | 0.0974  | 0.4964 | 0.63069 | 0.752 | -6.44 | 0.65192 | none |
| OR8K5    | 0.034  | 0.0342  | 0.4963 | 0.63076 | 0.752 | -6.44 | 0       | none |
| SLC25A47 | -0.032 | -0.0141 | -0.496 | 0.63081 | 0.752 | -6.44 | -0.2453 | none |
| MRPL23   | -0.088 | -0.0639 | -0.496 | 0.63082 | 0.752 | -6.44 | 0.07118 | none |
| MYL9     | 0.047  | 0.0775  | 0.4962 | 0.63083 | 0.752 | -6.44 | 1.02633 | none |
| LHX9     | -0.079 | -0.0902 | -0.496 | 0.631   | 0.752 | -6.44 | 0.53933 | none |
| THEG     | -0.039 | -0.0096 | -0.496 | 0.63106 | 0.752 | -6.44 | -0.7151 | none |
| IFNA5    | 0.034  | 0.0341  | 0.4956 | 0.63125 | 0.752 | -6.44 | 0       | none |
| KCNIP2   | 0.082  | 0.1305  | 0.4954 | 0.63138 | 0.752 | -6.44 | 0.45998 | none |
| C8G      | 0.133  | 0.1435  | 0.4953 | 0.63148 | 0.752 | -6.44 | -0.3016 | none |
| LARP7    | 0.124  | 0.2699  | 0.4951 | 0.63164 | 0.753 | -6.44 | 0.46819 | none |
| TNFAIP2  | 0.118  | 0.0716  | 0.4947 | 0.6319  | 0.753 | -6.44 | -0.4371 | none |
| PGM3     | 0.11   | 0.1433  | 0.4944 | 0.6321  | 0.753 | -6.44 | 1.47188 | none |
| AMOT     | -0.062 | -0.0561 | -0.494 | 0.63211 | 0.753 | -6.44 | 0.91556 | none |
| C3ORF14  | -0.11  | -0.221  | -0.494 | 0.63229 | 0.753 | -6.44 | 0.19035 | none |
| TBC1D26  | 0.05   | 0.0721  | 0.4939 | 0.63239 | 0.753 | -6.44 | -0.4524 | none |
| VSTM2L   | -0.036 | -0.0486 | -0.494 | 0.63243 | 0.753 | -6.44 | 0.25943 | none |
| RAB3IL1  | -0.079 | -0.0251 | -0.494 | 0.63258 | 0.753 | -6.44 | 0.0091  | none |
| C12ORF54 | 0.068  | 0.0538  | 0.4936 | 0.63264 | 0.753 | -6.44 | 1.28249 | none |
| IFI27    | -0.141 | -0.3015 | -0.493 | 0.63273 | 0.753 | -6.44 | 0.09332 | none |
| LRTM2    | -0.042 | -0.0298 | -0.493 | 0.63288 | 0.754 | -6.44 | 1.57682 | none |
| IL27RA   | 0.078  | 0.159   | 0.4932 | 0.63293 | 0.754 | -6.44 | 1.13807 | none |
| C17ORF67 | -0.066 | -0.0653 | -0.493 | 0.63317 | 0.754 | -6.44 | 0.27086 | none |
| NIT1     | -0.075 | -0.0856 | -0.493 | 0.63323 | 0.754 | -6.44 | 1.43439 | none |
| OR5AC2   | 0.034  | 0.0338  | 0.4923 | 0.63349 | 0.754 | -6.44 | 0       | none |
| OR7A10   | 0.034  | 0.0338  | 0.4923 | 0.63349 | 0.754 | -6.44 | 0       | none |
| CD300LB  | 0.035  | 0.035   | 0.4922 | 0.63354 | 0.754 | -6.44 | 0       | none |

|           |        |         |        |         |       |       |         |      |
|-----------|--------|---------|--------|---------|-------|-------|---------|------|
| CTAG1A    | 0.034  | 0.0338  | 0.4922 | 0.63358 | 0.754 | -6.44 | 0       | none |
| UBL4A     | -0.051 | 0.0106  | -0.492 | 0.63372 | 0.754 | -6.44 | 1.51405 | none |
| LHX3      | -0.037 | -0.0225 | -0.492 | 0.63386 | 0.754 | -6.44 | 0.67306 | none |
| CYP2A6    | 0.034  | 0.0338  | 0.4917 | 0.63392 | 0.754 | -6.44 | -0.7974 | none |
| URAD      | 0.034  | 0.0338  | 0.4917 | 0.63392 | 0.754 | -6.44 | 0       | none |
| DERA      | 0.075  | -0.0614 | 0.4916 | 0.634   | 0.754 | -6.44 | 0.50368 | none |
| RRP9      | -0.052 | 0.0143  | -0.492 | 0.63403 | 0.754 | -6.44 | 1.32206 | none |
| WIPI2     | -0.065 | -0.0473 | -0.491 | 0.63417 | 0.754 | -6.44 | 1.23713 | none |
| DAB1      | -0.049 | -0.0339 | -0.491 | 0.63424 | 0.754 | -6.44 | 0.74991 | none |
| ISCA2     | -0.069 | -0.1013 | -0.491 | 0.63428 | 0.754 | -6.44 | 0.51931 | none |
| HIST1H2BI | 0.119  | 0.144   | 0.4908 | 0.6345  | 0.755 | -6.44 | 0.87311 | none |
| ZNF629    | 0.036  | 0.0771  | 0.4904 | 0.63477 | 0.755 | -6.44 | 0.90355 | none |
| CCL19     | -0.068 | -0.0675 | -0.49  | 0.63493 | 0.755 | -6.44 | 0.76786 | none |
| FAM20A    | 0.046  | 0.06    | 0.4896 | 0.63537 | 0.755 | -6.45 | -0.6685 | none |
| HDAC1     | 0.039  | 0.0319  | 0.4895 | 0.63545 | 0.755 | -6.45 | 0.36332 | none |
| HRCT1     | 0.034  | 0.0336  | 0.4892 | 0.63562 | 0.756 | -6.45 | -0.7237 | none |
| AQP5      | 0.036  | 0.0363  | 0.4886 | 0.636   | 0.756 | -6.45 | 0.62862 | none |
| TULP2     | -0.098 | -0.1345 | -0.489 | 0.63605 | 0.756 | -6.45 | 1.36529 | none |
| OR52J3    | 0.034  | 0.0335  | 0.4886 | 0.63606 | 0.756 | -6.45 | 0       | none |
| HEXA      | -0.063 | -0.0922 | -0.488 | 0.63611 | 0.756 | -6.45 | 0.06814 | none |
| MBOAT2    | 0.067  | #####   | 0.4885 | 0.63613 | 0.756 | -6.45 | 1.03385 | none |
| TP53I13   | 0.041  | 0.0185  | 0.4883 | 0.6362  | 0.756 | -6.45 | 1.33789 | none |
| CTNNBIP1  | -0.143 | -0.2029 | -0.488 | 0.63622 | 0.756 | -6.45 | -0.4949 | none |
| AMN       | -0.041 | -0.0262 | -0.488 | 0.63634 | 0.756 | -6.45 | 0.42002 | none |
| BNIP2     | 0.033  | -0.0201 | 0.4881 | 0.63636 | 0.756 | -6.45 | 0.98994 | none |
| NUDT16    | 0.037  | 0.1226  | 0.4881 | 0.63637 | 0.756 | -6.45 | 0.76992 | none |
| FBXL3     | -0.082 | -0.1264 | -0.488 | 0.63643 | 0.756 | -6.45 | 1.27075 | none |
| SLC5A11   | 0.08   | 0.0639  | 0.488  | 0.63644 | 0.756 | -6.45 | 0.68684 | none |
| NAPA      | 0.066  | 0.0545  | 0.488  | 0.63646 | 0.756 | -6.45 | 0.16604 | none |
| NTSR1     | 0.054  | 0.0923  | 0.4879 | 0.63653 | 0.756 | -6.45 | 0.7771  | none |
| CD320     | -0.059 | -0.0496 | -0.488 | 0.63668 | 0.756 | -6.45 | -0.1478 | none |
| SOX10     | 0.098  | 0.1388  | 0.4876 | 0.63674 | 0.756 | -6.45 | 0.38759 | none |
| DEDD2     | -0.044 | -0.0579 | -0.488 | 0.63677 | 0.756 | -6.45 | 0.39956 | none |
| TMEM144   | 0.051  | 0.0101  | 0.4875 | 0.6368  | 0.756 | -6.45 | 0.45971 | none |
| OTOF      | -0.055 | -0.0309 | -0.487 | 0.63682 | 0.756 | -6.45 | 0.13039 | none |
| KLRF2     | 0.057  | 0.0137  | 0.4874 | 0.63686 | 0.756 | -6.45 | 0.6407  | none |
| IFNA16    | 0.033  | 0.0334  | 0.4866 | 0.6374  | 0.757 | -6.45 | 0       | none |
| OR8H3     | 0.033  | 0.0334  | 0.4866 | 0.6374  | 0.757 | -6.45 | 0       | none |
| GPR39     | 0.04   | 0.0397  | 0.4865 | 0.63744 | 0.757 | -6.45 | 0       | none |
| ZIM2      | 0.033  | 0.0333  | 0.4865 | 0.63744 | 0.757 | -6.45 | -0.8173 | none |

|          |        |         |        |         |       |       |         |            |
|----------|--------|---------|--------|---------|-------|-------|---------|------------|
| GJB1     | 0.088  | 0.1276  | 0.4863 | 0.6376  | 0.757 | -6.45 | 1.26461 | none       |
| THEMIS2  | -0.052 | 0.0039  | -0.486 | 0.63763 | 0.757 | -6.45 | 1.52384 | none       |
| RAPGEF5  | -0.061 | 0.0188  | -0.486 | 0.63783 | 0.757 | -6.45 | -0.0611 | none       |
| C1ORF226 | 0.037  | 0.0413  | 0.4858 | 0.63797 | 0.757 | -6.45 | 1.2349  | none       |
| NXPH4    | 0.047  | 0.07    | 0.4856 | 0.63811 | 0.757 | -6.45 | 0.24266 | none       |
| SEC22C   | 0.099  | -0.0353 | 0.4853 | 0.63826 | 0.757 | -6.45 | -0.3897 | none       |
| FAM86B1  | 0.088  | 0.0898  | 0.4852 | 0.63833 | 0.757 | -6.45 | 0.97119 | none       |
| CHSY1    | 0.117  | 0.154   | 0.4852 | 0.63835 | 0.757 | -6.45 | 0.67972 | none       |
| PRAMEF18 | -0.034 | -0.0209 | -0.485 | 0.63849 | 0.757 | -6.45 | 0       | none       |
| SRP19    | -0.067 | -0.1585 | -0.484 | 0.63898 | 0.758 | -6.45 | 0.4111  | none       |
| MIF4GD   | -0.042 | -0.0845 | -0.484 | 0.63923 | 0.758 | -6.45 | 1.26255 | none       |
| ESPNL    | -0.072 | -0.0418 | -0.484 | 0.63939 | 0.758 | -6.45 | 1.1252  | none       |
| SLAMF9   | 0.055  | 0.0552  | 0.4833 | 0.63966 | 0.758 | -6.45 | 1.21269 | none       |
| DCDC2B   | -0.037 | 0.0123  | -0.483 | 0.63982 | 0.759 | -6.45 | 2.27065 | AA-related |
| AP1AR    | 0.051  | 0.0431  | 0.483  | 0.63984 | 0.759 | -6.45 | 0.47482 | none       |
| DCK      | -0.063 | -0.1476 | -0.483 | 0.63986 | 0.759 | -6.45 | 0.83635 | none       |
| PITX3    | -0.035 | 0.0041  | -0.483 | 0.63987 | 0.759 | -6.45 | 0.22496 | none       |
| IGSF5    | -0.049 | -0.066  | -0.483 | 0.64005 | 0.759 | -6.45 | 1.02673 | none       |
| PROK1    | 0.034  | 0.0327  | 0.4827 | 0.64006 | 0.759 | -6.45 | 0       | none       |
| SLC38A11 | -0.033 | -0.0146 | -0.483 | 0.64011 | 0.759 | -6.45 | 0.7074  | none       |
| DLC1     | 0.033  | 0.0429  | 0.4826 | 0.64013 | 0.759 | -6.45 | -0.1027 | none       |
| DROSHA   | 0.118  | 0.1878  | 0.4819 | 0.64061 | 0.759 | -6.45 | -0.2146 | none       |
| GOLGA8K  | 0.054  | 0.0875  | 0.4816 | 0.64081 | 0.759 | -6.45 | 1.16957 | none       |
| RALY     | -0.053 | #####   | -0.482 | 0.64086 | 0.759 | -6.45 | 1.75401 | none       |
| HNRNPD   | 0.082  | 0.126   | 0.4813 | 0.64101 | 0.759 | -6.45 | -0.2198 | none       |
| MYO5B    | 0.046  | 0.0966  | 0.4811 | 0.64117 | 0.76  | -6.45 | 0.35722 | none       |
| MCEE     | 0.081  | -0.0411 | 0.481  | 0.64124 | 0.76  | -6.45 | 0.45522 | none       |
| MED19    | 0.064  | 0.0494  | 0.4807 | 0.64142 | 0.76  | -6.45 | -0.2241 | none       |
| ZNF812P  | 0.039  | 0.029   | 0.4807 | 0.64145 | 0.76  | -6.45 | -0.4521 | none       |
| NEURL1B  | 0.037  | 0.0415  | 0.4805 | 0.64157 | 0.76  | -6.45 | -0.2035 | none       |
| MARS2    | 0.065  | 0.0139  | 0.4805 | 0.6416  | 0.76  | -6.45 | 1.06531 | none       |
| RHOC     | -0.045 | -0.0951 | -0.48  | 0.64161 | 0.76  | -6.45 | 0.33261 | none       |
| C21ORF91 | -0.058 | -0.1482 | -0.48  | 0.64172 | 0.76  | -6.45 | 1.70358 | none       |
| OR1J1    | -0.039 | -0.0261 | -0.48  | 0.64176 | 0.76  | -6.45 | 1.30508 | none       |
| MAJIN    | -0.037 | -0.0473 | -0.48  | 0.6418  | 0.76  | -6.45 | 1.44693 | none       |
| BX004987 | -0.049 | -0.0014 | -0.48  | 0.6419  | 0.76  | -6.45 | 0.87361 | none       |
| CTSK     | -0.079 | 0.0055  | -0.48  | 0.64208 | 0.76  | -6.45 | 0.33973 | none       |
| CHCHD10  | -0.062 | -0.0836 | -0.48  | 0.64219 | 0.76  | -6.45 | -0.1857 | none       |
| NUDT8    | 0.102  | 0.0572  | 0.4795 | 0.64226 | 0.76  | -6.45 | 0.8273  | none       |
| TENM3    | 0.043  | 0.0523  | 0.4785 | 0.64298 | 0.761 | -6.45 | -0.7298 | none       |



|           |        |         |        |         |       |       |         |            |
|-----------|--------|---------|--------|---------|-------|-------|---------|------------|
| FGF14     | -0.032 | -0.0165 | -0.477 | 0.64365 | 0.762 | -6.45 | 0       | none       |
| RAD1      | 0.056  | -0.0481 | 0.4773 | 0.64377 | 0.762 | -6.45 | 0.42861 | none       |
| PALM3     | 0.053  | 0.0668  | 0.4772 | 0.64387 | 0.762 | -6.45 | 1.18711 | none       |
| CCNI      | 0.044  | -0.014  | 0.4771 | 0.64393 | 0.762 | -6.45 | 1.4007  | none       |
| ITGA5     | 0.058  | 0.1222  | 0.4771 | 0.64393 | 0.762 | -6.45 | -0.2057 | none       |
| OTOP2     | 0.035  | 0.0486  | 0.4768 | 0.6441  | 0.762 | -6.45 | 0.04328 | none       |
| SLC6A19   | -0.035 | -0.0077 | -0.477 | 0.64424 | 0.762 | -6.45 | 0.80117 | none       |
| BACH1     | -0.105 | -0.2168 | -0.476 | 0.64441 | 0.762 | -6.45 | 0.41033 | none       |
| RAP1GAP   | -0.064 | 0.0546  | -0.476 | 0.64441 | 0.762 | -6.45 | 0.21932 | none       |
| MLH3      | 0.094  | 0.2097  | 0.4762 | 0.64454 | 0.762 | -6.45 | 0.74288 | none       |
| PRKRIP1   | 0.055  | 0.1341  | 0.476  | 0.64469 | 0.762 | -6.45 | 0.3876  | none       |
| FLRT1     | -0.05  | -0.0059 | -0.476 | 0.64469 | 0.762 | -6.45 | 0.97617 | none       |
| IL1F10    | -0.038 | -0.0381 | -0.476 | 0.64472 | 0.762 | -6.45 | 1.32395 | none       |
| NDUFS3    | -0.066 | -0.123  | -0.476 | 0.64481 | 0.762 | -6.45 | 0.82702 | none       |
| STXBP5    | 0.095  | 0.1031  | 0.4757 | 0.6449  | 0.762 | -6.45 | 0.68806 | none       |
| SOST      | -0.037 | -0.0367 | -0.476 | 0.64495 | 0.762 | -6.45 | 1.37577 | none       |
| CDC42SE2  | -0.063 | -0.188  | -0.474 | 0.64588 | 0.763 | -6.45 | 0.42385 | none       |
| UFC1      | 0.049  | -0.0251 | 0.474  | 0.64607 | 0.764 | -6.45 | -0.7761 | none       |
| CEPT1     | 0.051  | -0.0278 | 0.4739 | 0.6461  | 0.764 | -6.45 | 0.02407 | none       |
| HOXA3     | -0.091 | -0.0295 | -0.474 | 0.6461  | 0.764 | -6.45 | 1.46401 | none       |
| ELMOD2    | 0.056  | -0.0207 | 0.4732 | 0.64659 | 0.764 | -6.45 | 0.46865 | none       |
| FXYD3     | 0.067  | 0.1191  | 0.4731 | 0.64665 | 0.764 | -6.45 | 1.39231 | none       |
| EEF1E1    | 0.068  | -0.0305 | 0.4731 | 0.64667 | 0.764 | -6.45 | 0.00907 | none       |
| BIVM-ERC1 | -0.035 | -0.0469 | -0.473 | 0.64691 | 0.764 | -6.45 | 0.43137 | none       |
| HMSD      | -0.043 | -0.0458 | -0.473 | 0.64706 | 0.764 | -6.45 | 1.44682 | none       |
| GOLGA8S   | 0.035  | 0.0233  | 0.4723 | 0.64719 | 0.765 | -6.45 | -0.5119 | none       |
| EPN3      | 0.09   | 0.159   | 0.4721 | 0.64734 | 0.765 | -6.45 | 0.40855 | none       |
| CAPZA1    | 0.049  | 0.0226  | 0.4721 | 0.64737 | 0.765 | -6.45 | -0.741  | none       |
| MPST      | 0.072  | 0.0065  | 0.472  | 0.64744 | 0.765 | -6.45 | -0.5272 | none       |
| GDAP1     | -0.099 | 0.0225  | -0.472 | 0.64758 | 0.765 | -6.45 | 2.09141 | none       |
| DIRC1     | -0.05  | 0.0011  | -0.472 | 0.64762 | 0.765 | -6.45 | 0.48557 | none       |
| CXCR1     | 0.04   | 0.0115  | 0.4715 | 0.64775 | 0.765 | -6.45 | 0.31567 | none       |
| RAB9B     | -0.032 | -0.0158 | -0.471 | 0.64782 | 0.765 | -6.45 | 2.1286  | AA-related |
| GALR3     | 0.054  | 0.0073  | 0.4713 | 0.64786 | 0.765 | -6.45 | -0.7543 | none       |
| HIST1H4K  | -0.203 | -0.1789 | -0.471 | 0.64803 | 0.765 | -6.45 | 1.03223 | none       |
| PMF1      | 0.052  | -0.0076 | 0.471  | 0.64808 | 0.765 | -6.45 | -0.6457 | none       |
| IMP4      | -0.052 | 0.0059  | -0.471 | 0.64823 | 0.765 | -6.45 | 0.163   | none       |
| BIN1      | 0.068  | 0.1202  | 0.4707 | 0.64834 | 0.765 | -6.45 | 0.62724 | none       |
| SUSD2     | 0.035  | 0.0089  | 0.4706 | 0.64841 | 0.765 | -6.45 | 0.59553 | none       |
| RIMS3     | 0.039  | 0.0361  | 0.4702 | 0.64864 | 0.766 | -6.45 | 0.11144 | none       |

|          |        |         |        |         |       |       |         |      |
|----------|--------|---------|--------|---------|-------|-------|---------|------|
| G6PD     | 0.1    | 0.1672  | 0.47   | 0.64876 | 0.766 | -6.46 | 0.5921  | none |
| ACTL9    | 0.039  | 0.047   | 0.4699 | 0.64883 | 0.766 | -6.46 | 1.84575 | none |
| AMIGO1   | 0.056  | 0.0959  | 0.4698 | 0.64891 | 0.766 | -6.46 | 1.34778 | none |
| TMEM158  | 0.038  | 0.0287  | 0.4698 | 0.64896 | 0.766 | -6.46 | 0.22101 | none |
| MRPL1    | 0.045  | -0.0426 | 0.4696 | 0.64907 | 0.766 | -6.46 | 0.42586 | none |
| IRX4     | -0.041 | -0.0305 | -0.469 | 0.64938 | 0.766 | -6.46 | 1.45344 | none |
| NDUFAF3  | -0.072 | -0.091  | -0.469 | 0.6494  | 0.766 | -6.46 | 1.60516 | none |
| SRXN1    | -0.088 | 0.0449  | -0.469 | 0.64953 | 0.766 | -6.46 | 0.81096 | none |
| SALL3    | -0.038 | -0.0282 | -0.469 | 0.64961 | 0.766 | -6.46 | -0.2811 | none |
| ATG7     | 0.049  | 0.0295  | 0.4686 | 0.64976 | 0.766 | -6.46 | 0.18183 | none |
| TNFAIP1  | 0.085  | 0.0901  | 0.4681 | 0.6501  | 0.767 | -6.46 | 0.46432 | none |
| PRR5-ARH | 0.059  | 0.0648  | 0.4676 | 0.65046 | 0.767 | -6.46 | 1.49877 | none |
| ANAPC10  | 0.118  | 0.0093  | 0.4676 | 0.65048 | 0.767 | -6.46 | 0.48022 | none |
| FAM104B  | 0.11   | -0.0517 | 0.4675 | 0.65051 | 0.767 | -6.46 | -0.0033 | none |
| CDKN2B   | 0.086  | 0.0132  | 0.4674 | 0.6506  | 0.767 | -6.46 | 0.3259  | none |
| WDR18    | -0.047 | -0.0316 | -0.467 | 0.65061 | 0.767 | -6.46 | 0.75559 | none |
| CILP2    | -0.061 | -0.0445 | -0.467 | 0.65067 | 0.767 | -6.46 | 0.69549 | none |
| ANXA2R   | 0.086  | -0.0512 | 0.467  | 0.65083 | 0.767 | -6.46 | 0.28679 | none |
| SLC4A11  | 0.069  | 0.0808  | 0.4657 | 0.65175 | 0.768 | -6.46 | 1.00656 | none |
| WSCD1    | -0.069 | -0.0124 | -0.466 | 0.65177 | 0.768 | -6.46 | 0.64923 | none |
| C9ORF135 | -0.05  | -0.0843 | -0.465 | 0.652   | 0.768 | -6.46 | -0.56   | none |
| FAM209B  | -0.048 | 0.0418  | -0.465 | 0.65218 | 0.769 | -6.46 | -0.1431 | none |
| OR56B4   | 0.032  | 0.0429  | 0.4649 | 0.65229 | 0.769 | -6.46 | 1.09028 | none |
| LRRIQ4   | 0.033  | 0.0343  | 0.4649 | 0.65231 | 0.769 | -6.46 | 1.20231 | none |
| CCT2     | -0.037 | -0.0509 | -0.465 | 0.65237 | 0.769 | -6.46 | 1.01078 | none |
| LENG1    | 0.032  | 0.0431  | 0.4646 | 0.6525  | 0.769 | -6.46 | 0.44734 | none |
| DUSP12   | -0.06  | -0.0751 | -0.465 | 0.65256 | 0.769 | -6.46 | 1.41755 | none |
| SPESP1   | -0.064 | #####   | -0.464 | 0.65262 | 0.769 | -6.46 | 0.81639 | none |
| ZFP3     | 0.034  | 0.0384  | 0.4642 | 0.65281 | 0.769 | -6.46 | 0.01746 | none |
| TMX1     | -0.069 | -0.1376 | -0.464 | 0.65288 | 0.769 | -6.46 | 0.98836 | none |
| FOSL1    | 0.097  | 0.2073  | 0.4641 | 0.65289 | 0.769 | -6.46 | 0.30969 | none |
| SOHLH2   | -0.034 | -0.0288 | -0.464 | 0.65305 | 0.769 | -6.46 | 1.05188 | none |
| HAS3     | -0.083 | 0.0137  | -0.464 | 0.65323 | 0.769 | -6.46 | 0.51941 | none |
| CT45A5   | 0.034  | 0.0132  | 0.4634 | 0.65333 | 0.769 | -6.46 | -0.2435 | none |
| ABI2     | -0.052 | -0.0649 | -0.462 | 0.65435 | 0.77  | -6.46 | 1.37548 | none |
| EMP1     | -0.08  | 0.0138  | -0.462 | 0.65442 | 0.77  | -6.46 | 0.54481 | none |
| STC1     | 0.031  | 0.0567  | 0.4618 | 0.65443 | 0.77  | -6.46 | 0.07478 | none |
| TOR2A    | 0.046  | 0.0088  | 0.4618 | 0.65445 | 0.77  | -6.46 | 0.6499  | none |
| SSX2IP   | -0.086 | 0.0045  | -0.462 | 0.65446 | 0.77  | -6.46 | 1.40942 | none |
| PPP1R16B | 0.097  | 0.2509  | 0.4613 | 0.6548  | 0.771 | -6.46 | -0.0304 | none |

|          |        |         |        |         |       |       |         |      |
|----------|--------|---------|--------|---------|-------|-------|---------|------|
| ATP8B4   | 0.105  | 0.0068  | 0.4613 | 0.65481 | 0.771 | -6.46 | 0.44161 | none |
| LRCH1    | 0.09   | 0.1788  | 0.4612 | 0.65486 | 0.771 | -6.46 | 0.62547 | none |
| HK3      | 0.095  | 0.0068  | 0.4608 | 0.65512 | 0.771 | -6.46 | 0.36873 | none |
| PAN2     | 0.077  | 0.1058  | 0.4607 | 0.65521 | 0.771 | -6.46 | 0.71183 | none |
| UMAD1    | 0.073  | -0.0285 | 0.4605 | 0.65533 | 0.771 | -6.46 | -0.3821 | none |
| TGM4     | -0.09  | -0.084  | -0.46  | 0.65541 | 0.771 | -6.46 | 0.30141 | none |
| CCDC85B  | -0.075 | -0.0573 | -0.46  | 0.65542 | 0.771 | -6.46 | 0.62872 | none |
| CEP162   | 0.06   | 0.1273  | 0.4602 | 0.65559 | 0.771 | -6.46 | 0.31227 | none |
| KBTBD7   | 0.035  | -0.0198 | 0.4601 | 0.65564 | 0.771 | -6.46 | 0.49808 | none |
| ZNF573   | 0.17   | 0.1053  | 0.46   | 0.65567 | 0.771 | -6.46 | 0.71319 | none |
| RBBP4    | 0.035  | -0.0044 | 0.46   | 0.65573 | 0.771 | -6.46 | 0.2251  | none |
| ETS2     | -0.057 | -0.0404 | -0.46  | 0.65595 | 0.771 | -6.46 | 1.5625  | none |
| CELA2B   | -0.069 | -0.0366 | -0.46  | 0.65602 | 0.771 | -6.46 | 1.17566 | none |
| CCR3     | 0.084  | 0.0407  | 0.4595 | 0.65607 | 0.771 | -6.46 | -0.1981 | none |
| ZNF138   | -0.059 | -0.0611 | -0.459 | 0.65629 | 0.772 | -6.46 | 0.45196 | none |
| MITF     | -0.053 | 0.0597  | -0.459 | 0.65636 | 0.772 | -6.46 | 0.55593 | none |
| TLE6     | 0.088  | 0.128   | 0.4588 | 0.6565  | 0.772 | -6.46 | 0.42228 | none |
| ARHGEF17 | 0.064  | 0.1849  | 0.4581 | 0.65703 | 0.772 | -6.46 | 0.70834 | none |
| F8A3     | -0.055 | -0.0444 | -0.458 | 0.65723 | 0.772 | -6.46 | 0.62078 | none |
| EHBP1L1  | 0.141  | 0.2182  | 0.4578 | 0.65724 | 0.772 | -6.46 | -0.2837 | none |
| SHOX2    | -0.05  | -0.0507 | -0.458 | 0.65743 | 0.773 | -6.46 | 1.61016 | none |
| 10-Mar   | -0.058 | 0.0052  | -0.457 | 0.65745 | 0.773 | -6.46 | -0.0366 | none |
| SCGB2A2  | 0.049  | 0.0878  | 0.4572 | 0.65762 | 0.773 | -6.46 | 1.42595 | none |
| MBD2     | -0.118 | -0.0304 | -0.457 | 0.65776 | 0.773 | -6.46 | 0.55207 | none |
| ZNF501   | 0.039  | 0.0686  | 0.4569 | 0.65784 | 0.773 | -6.46 | -0.1606 | none |
| ZNF607   | -0.036 | 0.0291  | -0.457 | 0.6579  | 0.773 | -6.46 | 0.51288 | none |
| NEU4     | -0.036 | -0.0299 | -0.457 | 0.658   | 0.773 | -6.46 | 1.35031 | none |
| TMPRSS13 | 0.046  | 0.093   | 0.4566 | 0.65806 | 0.773 | -6.46 | 1.26825 | none |
| HEATR5A  | 0.105  | -0.0593 | 0.4566 | 0.65809 | 0.773 | -6.46 | -0.4998 | none |
| SNX18    | -0.062 | -0.0131 | -0.457 | 0.65812 | 0.773 | -6.46 | 0.8941  | none |
| KIF22    | 0.063  | 0.1478  | 0.4562 | 0.6583  | 0.773 | -6.46 | 0.66578 | none |
| EPGN     | 0.04   | 0.0531  | 0.4562 | 0.65832 | 0.773 | -6.46 | 0.70079 | none |
| C11ORF95 | 0.055  | 0.0984  | 0.4561 | 0.6584  | 0.773 | -6.46 | 0.78937 | none |
| POTEB    | 0.061  | 0.0322  | 0.4561 | 0.65842 | 0.773 | -6.46 | -0.1013 | none |
| MPG      | -0.073 | -0.134  | -0.456 | 0.65842 | 0.773 | -6.46 | 0.88452 | none |
| NUP58    | 0.069  | 0.0868  | 0.456  | 0.65844 | 0.773 | -6.46 | 1.03828 | none |
| PARK7    | -0.041 | -0.0737 | -0.456 | 0.65847 | 0.773 | -6.46 | 0.29964 | none |
| PRPH     | 0.039  | 0.0614  | 0.4559 | 0.65856 | 0.773 | -6.46 | -0.2496 | none |
| DUSP9    | 0.031  | 0.0285  | 0.4556 | 0.65877 | 0.773 | -6.46 | 0.39406 | none |
| SSX4     | -0.037 | -0.0215 | -0.455 | 0.65924 | 0.774 | -6.46 | -0.1559 | none |

|         |        |         |        |         |       |       |         |      |
|---------|--------|---------|--------|---------|-------|-------|---------|------|
| SSX4B   | -0.037 | -0.0215 | -0.455 | 0.65924 | 0.774 | -6.46 | -0.1559 | none |
| DYNLRB2 | -0.063 | -0.0751 | -0.455 | 0.65924 | 0.774 | -6.46 | 1.66517 | none |
| CENPQ   | -0.083 | -0.0621 | -0.455 | 0.65936 | 0.774 | -6.46 | 0.62367 | none |
| DUX4    | -0.155 | -0.1084 | -0.454 | 0.65952 | 0.774 | -6.46 | -0.3564 | none |
| GNAZ    | -0.04  | 0.0196  | -0.454 | 0.65965 | 0.774 | -6.46 | -0.2792 | none |
| PRSS8   | 0.067  | 0.0416  | 0.4542 | 0.65972 | 0.774 | -6.46 | -0.1887 | none |
| KLHL41  | 0.076  | 0.1033  | 0.4539 | 0.65991 | 0.774 | -6.46 | 1.54461 | none |
| COA4    | -0.068 | -0.1044 | -0.454 | 0.6601  | 0.774 | -6.46 | 0.82313 | none |
| TOM1    | -0.06  | 0.035   | -0.453 | 0.66038 | 0.775 | -6.46 | 1.2463  | none |
| CCDC71L | -0.084 | -0.0528 | -0.453 | 0.66067 | 0.775 | -6.46 | 1.10855 | none |
| UBP1    | 0.067  | 0.1046  | 0.4528 | 0.66068 | 0.775 | -6.46 | 0.40613 | none |
| NTN4    | 0.074  | 0.0745  | 0.4525 | 0.66088 | 0.775 | -6.46 | -0.5397 | none |
| ZNF319  | -0.113 | -0.0775 | -0.452 | 0.66092 | 0.775 | -6.46 | 1.91799 | none |
| HEXIM2  | 0.066  | 0.1067  | 0.4523 | 0.66106 | 0.775 | -6.46 | 0.47562 | none |
| UTP15   | -0.067 | -0.0928 | -0.452 | 0.66123 | 0.775 | -6.46 | 1.21915 | none |
| SIRPA   | 0.031  | 0.0386  | 0.452  | 0.66124 | 0.775 | -6.46 | 0       | none |
| DUSP22  | -0.066 | -0.0738 | -0.452 | 0.66131 | 0.775 | -6.46 | 0.84492 | none |
| UNC45B  | 0.034  | 0.0257  | 0.4518 | 0.6614  | 0.775 | -6.46 | -0.9308 | none |
| SCUBE1  | 0.092  | 0.0222  | 0.4517 | 0.66146 | 0.775 | -6.46 | 0.07489 | none |
| TRAK2   | 0.09   | 0.1217  | 0.4517 | 0.66149 | 0.775 | -6.46 | 1.2887  | none |
| DDX24   | -0.046 | 0.0323  | -0.451 | 0.66167 | 0.775 | -6.46 | 0.90452 | none |
| ZNF710  | 0.161  | 0.2371  | 0.4509 | 0.66204 | 0.776 | -6.46 | -0.7447 | none |
| KLF10   | 0.038  | 0.0428  | 0.4507 | 0.66215 | 0.776 | -6.46 | 0.338   | none |
| CASP5   | -0.032 | -0.0292 | -0.451 | 0.66221 | 0.776 | -6.46 | -0.6574 | none |
| DCAF13  | -0.051 | -0.0595 | -0.451 | 0.66224 | 0.776 | -6.46 | 0.03884 | none |
| TMED6   | -0.059 | 0.019   | -0.45  | 0.66236 | 0.776 | -6.46 | -0.2099 | none |
| CYTL1   | -0.031 | -0.0307 | -0.45  | 0.66238 | 0.776 | -6.46 | 0       | none |
| ANKRD50 | 0.037  | 0.0457  | 0.4498 | 0.66278 | 0.776 | -6.46 | 0       | none |
| PIN1    | 0.055  | 0.0566  | 0.4496 | 0.66289 | 0.776 | -6.46 | 0.02432 | none |
| LRRTM2  | 0.034  | 0.0194  | 0.4495 | 0.66303 | 0.777 | -6.47 | -0.0544 | none |
| CCDC68  | 0.055  | 0.0436  | 0.4492 | 0.66318 | 0.777 | -6.47 | -0.138  | none |
| TMEM177 | -0.081 | -0.033  | -0.449 | 0.66322 | 0.777 | -6.47 | 1.8566  | none |
| SPDYE4  | -0.061 | -0.0043 | -0.449 | 0.66323 | 0.777 | -6.47 | 0.59543 | none |
| CARD16  | 0.064  | -0.0314 | 0.4491 | 0.66324 | 0.777 | -6.47 | -0.7533 | none |
| PDXP    | -0.094 | -0.0921 | -0.449 | 0.66362 | 0.777 | -6.47 | -0.1562 | none |
| ABCB1   | 0.076  | 0.0719  | 0.4484 | 0.66378 | 0.777 | -6.47 | -0.6406 | none |
| IRX3    | 0.044  | 0.0611  | 0.4483 | 0.6638  | 0.777 | -6.47 | 1.50692 | none |
| FCER1A  | -0.042 | -0.0638 | -0.448 | 0.66382 | 0.777 | -6.47 | 0.79459 | none |
| ANKRD33 | -0.03  | -0.0182 | -0.448 | 0.66409 | 0.777 | -6.47 | 1.68091 | none |
| JOSD2   | 0.063  | 0.0239  | 0.4478 | 0.66415 | 0.777 | -6.47 | -0.6842 | none |

|          |        |         |        |         |       |       |         |      |
|----------|--------|---------|--------|---------|-------|-------|---------|------|
| GPBP1    | 0.096  | 0.1389  | 0.4476 | 0.66432 | 0.777 | -6.47 | 0.7546  | none |
| PDK4     | 0.064  | -0.0061 | 0.4474 | 0.66445 | 0.777 | -6.47 | 1.25775 | none |
| RNF139   | 0.058  | -0.0425 | 0.4473 | 0.66452 | 0.777 | -6.47 | 0.70896 | none |
| SOX4     | 0.083  | 0.056   | 0.4473 | 0.66454 | 0.777 | -6.47 | -0.5426 | none |
| XRCC1    | 0.095  | 0.2096  | 0.4472 | 0.66457 | 0.777 | -6.47 | 0.27306 | none |
| B4GALT3  | -0.067 | -0.096  | -0.447 | 0.66463 | 0.777 | -6.47 | 0.87243 | none |
| EMILIN1  | -0.034 | -0.0207 | -0.447 | 0.66463 | 0.777 | -6.47 | 1.02614 | none |
| EYA4     | 0.047  | 0.0472  | 0.4469 | 0.66477 | 0.778 | -6.47 | 0.75923 | none |
| TSPAN8   | -0.09  | -0.0032 | -0.447 | 0.66495 | 0.778 | -6.47 | 0.2374  | none |
| SIK1     | 0.116  | 0.1532  | 0.4466 | 0.66498 | 0.778 | -6.47 | -0.4537 | none |
| MTF2     | -0.047 | -0.0602 | -0.447 | 0.66507 | 0.778 | -6.47 | 0.25401 | none |
| ID2      | -0.087 | -0.14   | -0.446 | 0.6651  | 0.778 | -6.47 | 0.47915 | none |
| PRSS1    | -0.032 | -0.03   | -0.446 | 0.66513 | 0.778 | -6.47 | 1.54695 | none |
| IGIP     | 0.038  | 0.022   | 0.4463 | 0.66525 | 0.778 | -6.47 | -0.3989 | none |
| SFTPA2   | -0.031 | -0.0063 | -0.446 | 0.66532 | 0.778 | -6.47 | 1.6208  | none |
| CS       | 0.048  | 0.0165  | 0.446  | 0.66544 | 0.778 | -6.47 | 0.35837 | none |
| SPANXA2  | -0.106 | -0.1059 | -0.446 | 0.66549 | 0.778 | -6.47 | 1.55316 | none |
| RAB4B-EG | -0.075 | -0.0358 | -0.446 | 0.66564 | 0.778 | -6.47 | 0.82689 | none |
| NAP1L3   | 0.071  | 0.0853  | 0.4453 | 0.66595 | 0.778 | -6.47 | 0.22661 | none |
| C11ORF74 | -0.072 | -0.1677 | -0.445 | 0.66607 | 0.778 | -6.47 | 0.35944 | none |
| FBXW5    | 0.046  | 0.0703  | 0.4445 | 0.66651 | 0.779 | -6.47 | 0.58486 | none |
| POU4F1   | 0.031  | 0.0334  | 0.4444 | 0.66653 | 0.779 | -6.47 | 0.5276  | none |
| RITA1    | -0.047 | -0.0508 | -0.444 | 0.66661 | 0.779 | -6.47 | 1.77576 | none |
| TCF21    | 0.033  | 0.0422  | 0.4442 | 0.66669 | 0.779 | -6.47 | -0.582  | none |
| NOX1     | -0.07  | -0.0571 | -0.444 | 0.66716 | 0.779 | -6.47 | 0.64185 | none |
| TSSK4    | 0.06   | 0.0688  | 0.4435 | 0.6672  | 0.779 | -6.47 | -0.551  | none |
| C4ORF46  | 0.081  | -0.0137 | 0.4424 | 0.66791 | 0.78  | -6.47 | 0.97108 | none |
| SSNA1    | 0.063  | 0.0496  | 0.4424 | 0.66791 | 0.78  | -6.47 | -0.2314 | none |
| MAP3K4   | 0.119  | 0.1743  | 0.4424 | 0.66797 | 0.78  | -6.47 | 0.9682  | none |
| RGPD3    | -0.03  | -0.0428 | -0.442 | 0.66801 | 0.78  | -6.47 | 1.08499 | none |
| SAMD14   | -0.039 | -0.0296 | -0.442 | 0.66814 | 0.78  | -6.47 | 0.56241 | none |
| PROZ     | -0.066 | -0.0905 | -0.442 | 0.66822 | 0.78  | -6.47 | 0.71417 | none |
| CLPTM1L  | -0.077 | -0.0772 | -0.442 | 0.66831 | 0.78  | -6.47 | 1.35537 | none |
| SYNCRIP  | -0.077 | 0.0316  | -0.442 | 0.66837 | 0.78  | -6.47 | 1.49926 | none |
| SHC4     | -0.093 | 0.0494  | -0.442 | 0.66841 | 0.78  | -6.47 | -0.2596 | none |
| KDM8     | 0.089  | 0.1795  | 0.4416 | 0.66849 | 0.78  | -6.47 | 1.80637 | none |
| MCIDAS   | 0.038  | 0.047   | 0.4415 | 0.66855 | 0.78  | -6.47 | -0.743  | none |
| JDP2     | 0.04   | 0.0591  | 0.4413 | 0.66873 | 0.781 | -6.47 | 0.24022 | none |
| ANKRD17  | 0.126  | 0.3142  | 0.441  | 0.66893 | 0.781 | -6.47 | 0.70322 | none |
| SLC35D2  | -0.052 | -0.1529 | -0.441 | 0.66894 | 0.781 | -6.47 | -0.2327 | none |

|          |        |         |        |         |       |       |         |      |
|----------|--------|---------|--------|---------|-------|-------|---------|------|
| NEFL     | 0.034  | 0.0415  | 0.441  | 0.66894 | 0.781 | -6.47 | -0.6001 | none |
| CELF4    | 0.12   | 0.0949  | 0.4408 | 0.66906 | 0.781 | -6.47 | 0.96521 | none |
| AMZ1     | -0.039 | -0.0118 | -0.441 | 0.6691  | 0.781 | -6.47 | 0.5433  | none |
| MTERF1   | 0.084  | 0.1122  | 0.4406 | 0.66918 | 0.781 | -6.47 | -0.0822 | none |
| MID1     | 0.037  | 0.0154  | 0.4405 | 0.66926 | 0.781 | -6.47 | 0.00492 | none |
| INSM1    | 0.034  | 0.0339  | 0.4404 | 0.66936 | 0.781 | -6.47 | 1.26562 | none |
| BPIFA3   | 0.031  | 0.0507  | 0.44   | 0.66965 | 0.781 | -6.47 | 0.09134 | none |
| USH1G    | -0.033 | -0.0163 | -0.44  | 0.66973 | 0.781 | -6.47 | 0.61422 | none |
| UGT3A1   | -0.053 | -0.0502 | -0.44  | 0.6698  | 0.781 | -6.47 | 0.60896 | none |
| PI4K2B   | -0.065 | -0.058  | -0.439 | 0.67008 | 0.781 | -6.47 | 1.18604 | none |
| PGAP2    | -0.041 | -0.0657 | -0.439 | 0.67016 | 0.781 | -6.47 | 1.46604 | none |
| SCAMP2   | -0.051 | -0.0956 | -0.439 | 0.67017 | 0.781 | -6.47 | 0.52522 | none |
| IL17A    | -0.111 | -0.1392 | -0.439 | 0.67018 | 0.781 | -6.47 | 0.78352 | none |
| HAPLN3   | -0.051 | -0.0781 | -0.439 | 0.6702  | 0.781 | -6.47 | 0.49396 | none |
| LMO1     | -0.055 | -0.0627 | -0.439 | 0.67038 | 0.782 | -6.47 | 0.48313 | none |
| GLTPD2   | 0.039  | 0.0213  | 0.4388 | 0.67043 | 0.782 | -6.47 | 0.52391 | none |
| SLCO1B7  | 0.032  | 0.0429  | 0.4385 | 0.67065 | 0.782 | -6.47 | -0.7347 | none |
| C12ORF73 | 0.084  | -0.0096 | 0.4385 | 0.67069 | 0.782 | -6.47 | -0.2913 | none |
| SCN4A    | 0.037  | 0.0455  | 0.4384 | 0.67075 | 0.782 | -6.47 | 0.89054 | none |
| ADCY6    | 0.076  | 0.0077  | 0.4381 | 0.67096 | 0.782 | -6.47 | -0.046  | none |
| KLHL14   | -0.035 | -0.0343 | -0.438 | 0.67114 | 0.782 | -6.47 | 1.74629 | none |
| LRRC6    | -0.052 | -0.0246 | -0.438 | 0.67116 | 0.782 | -6.47 | 1.87798 | none |
| HES1     | -0.048 | -0.0468 | -0.438 | 0.67124 | 0.782 | -6.47 | 0.92111 | none |
| SDHAF3   | 0.119  | -0.0656 | 0.4375 | 0.67136 | 0.782 | -6.47 | -0.2255 | none |
| RBM15B   | 0.081  | 0.1739  | 0.4373 | 0.67151 | 0.782 | -6.47 | 0.28439 | none |
| NINJ1    | -0.05  | -0.0043 | -0.437 | 0.67161 | 0.782 | -6.47 | 1.5292  | none |
| FEN1     | -0.058 | 0.0456  | -0.437 | 0.67169 | 0.783 | -6.47 | 1.24017 | none |
| ZFAND2A  | 0.058  | 0.0551  | 0.4369 | 0.67178 | 0.783 | -6.47 | 0.85003 | none |
| DTX1     | -0.089 | #####   | -0.437 | 0.67193 | 0.783 | -6.47 | 0.21325 | none |
| NUTM2B   | -0.054 | -0.0083 | -0.437 | 0.67203 | 0.783 | -6.47 | 0.9022  | none |
| CMTM2    | 0.048  | 0.0532  | 0.4362 | 0.67225 | 0.783 | -6.47 | 1.59291 | none |
| RDH5     | -0.175 | -0.0263 | -0.436 | 0.6723  | 0.783 | -6.47 | 0.74276 | none |
| SUSD1    | 0.091  | 0.1198  | 0.4361 | 0.67236 | 0.783 | -6.47 | -0.1491 | none |
| GNGT2    | 0.093  | -0.0256 | 0.4361 | 0.67237 | 0.783 | -6.47 | -0.7799 | none |
| TEKT1    | -0.031 | -0.0312 | -0.436 | 0.67247 | 0.783 | -6.47 | 1.0022  | none |
| CDADC1   | -0.052 | -0.0077 | -0.436 | 0.67248 | 0.783 | -6.47 | 0.94991 | none |
| LILRB4   | 0.088  | 0.0858  | 0.4355 | 0.67279 | 0.783 | -6.47 | 1.41387 | none |
| NUP93    | -0.037 | -0.01   | -0.435 | 0.67279 | 0.783 | -6.47 | 0.34791 | none |
| TKT      | 0.082  | 0.1453  | 0.4354 | 0.67284 | 0.783 | -6.47 | 1.43867 | none |
| GPATCH3  | 0.037  | 0.1037  | 0.4353 | 0.67292 | 0.783 | -6.47 | 1.45837 | none |

|          |        |         |        |         |       |       |         |      |
|----------|--------|---------|--------|---------|-------|-------|---------|------|
| MBD3L3   | 0.034  | 0.0512  | 0.4352 | 0.673   | 0.783 | -6.47 | 1.45851 | none |
| UCHL5    | -0.066 | -0.0398 | -0.435 | 0.67304 | 0.783 | -6.47 | 1.16449 | none |
| PILRA    | -0.038 | 0.0126  | -0.435 | 0.67307 | 0.783 | -6.47 | 0.47402 | none |
| RXRB     | -0.041 | -0.0084 | -0.435 | 0.6731  | 0.783 | -6.47 | 0.60746 | none |
| CDK5RAP2 | 0.11   | 0.1994  | 0.4346 | 0.67344 | 0.784 | -6.47 | 0.01384 | none |
| LCP1     | 0.086  | 0.1479  | 0.4344 | 0.67356 | 0.784 | -6.47 | 0.965   | none |
| TTC23L   | -0.044 | -0.0367 | -0.434 | 0.67366 | 0.784 | -6.47 | 0.80831 | none |
| CGB2     | 0.05   | 0.0882  | 0.4341 | 0.67379 | 0.784 | -6.47 | -0.2302 | none |
| SLC25A48 | -0.035 | -0.0224 | -0.434 | 0.67379 | 0.784 | -6.47 | 0.00775 | none |
| ARHGAP40 | 0.032  | 0.0422  | 0.434  | 0.67381 | 0.784 | -6.47 | 1.58698 | none |
| OR2C1    | -0.036 | -0.0358 | -0.434 | 0.67382 | 0.784 | -6.47 | 0.89247 | none |
| HDAC3    | 0.049  | -0.0074 | 0.4336 | 0.67413 | 0.784 | -6.47 | 0.40325 | none |
| PBXIP1   | 0.079  | 0.1146  | 0.4335 | 0.67417 | 0.784 | -6.47 | -0.149  | none |
| CYB5R2   | -0.053 | -0.0795 | -0.433 | 0.67418 | 0.784 | -6.47 | 0.11044 | none |
| EMILIN2  | 0.061  | 0.0177  | 0.4334 | 0.67425 | 0.784 | -6.47 | -0.597  | none |
| NEFM     | 0.047  | 0.114   | 0.433  | 0.67453 | 0.784 | -6.47 | 0.24466 | none |
| TBC1D28  | 0.072  | 0.0945  | 0.4328 | 0.67463 | 0.784 | -6.47 | -0.1449 | none |
| SLC16A9  | 0.068  | 0.1269  | 0.4328 | 0.67466 | 0.784 | -6.47 | 0.55041 | none |
| CDT1     | 0.054  | 0.0726  | 0.432  | 0.67524 | 0.785 | -6.47 | -0.0525 | none |
| STK17A   | 0.043  | -0.0119 | 0.4317 | 0.67541 | 0.785 | -6.47 | 0.17651 | none |
| COL4A4   | -0.04  | -0.048  | -0.431 | 0.67558 | 0.785 | -6.47 | 0.42003 | none |
| PDE6C    | -0.053 | -0.0076 | -0.431 | 0.67563 | 0.785 | -6.47 | 0.78209 | none |
| YOD1     | 0.037  | 0.0246  | 0.4314 | 0.67566 | 0.785 | -6.47 | 0.42338 | none |
| CRABP2   | -0.088 | -0.1269 | -0.431 | 0.67574 | 0.785 | -6.47 | 0.65373 | none |
| APTX     | -0.044 | -0.0451 | -0.431 | 0.67582 | 0.785 | -6.47 | 0.40792 | none |
| PGLYRP2  | -0.049 | 0.0013  | -0.431 | 0.67585 | 0.785 | -6.47 | -0.1431 | none |
| COPS7A   | 0.04   | 0.0129  | 0.431  | 0.6759  | 0.785 | -6.47 | 0.41367 | none |
| UBE2U    | -0.03  | -0.0302 | -0.431 | 0.67599 | 0.785 | -6.47 | 1.91174 | none |
| SPATA2   | -0.048 | -0.0046 | -0.431 | 0.67608 | 0.785 | -6.47 | 0.9401  | none |
| ZFP36L1  | 0.063  | 0.1368  | 0.4307 | 0.67615 | 0.785 | -6.47 | -0.2685 | none |
| YIF1B    | 0.058  | 0.0064  | 0.4305 | 0.67629 | 0.785 | -6.47 | 0.29417 | none |
| APBB1    | 0.073  | 0.0852  | 0.4303 | 0.67639 | 0.786 | -6.47 | 0.62144 | none |
| NUP35    | 0.066  | -0.0813 | 0.4302 | 0.67646 | 0.786 | -6.47 | 0.09136 | none |
| GJA8     | 0.038  | 0.0384  | 0.43   | 0.67663 | 0.786 | -6.47 | 0.90101 | none |
| EDNRA    | 0.033  | 0.044   | 0.43   | 0.67666 | 0.786 | -6.47 | 1.36389 | none |
| DPAGT1   | 0.039  | -0.0035 | 0.4296 | 0.67692 | 0.786 | -6.47 | 0.73926 | none |
| C4ORF17  | -0.03  | -0.0128 | -0.429 | 0.67699 | 0.786 | -6.47 | 0       | none |
| MAGEA8   | 0.035  | 0.02    | 0.4292 | 0.67718 | 0.786 | -6.47 | -0.3871 | none |
| CPA1     | 0.036  | 0.046   | 0.429  | 0.67736 | 0.786 | -6.47 | 1.3263  | none |
| EN2      | 0.03   | 0.027   | 0.4285 | 0.67768 | 0.787 | -6.47 | 0       | none |

|         |        |         |        |         |       |       |         |      |
|---------|--------|---------|--------|---------|-------|-------|---------|------|
| EGFL6   | -0.039 | -0.0108 | -0.428 | 0.67789 | 0.787 | -6.47 | 1.78453 | none |
| TFAP2D  | 0.035  | 0.035   | 0.4282 | 0.67792 | 0.787 | -6.47 | 1.31366 | none |
| DGKI    | 0.06   | 0.0628  | 0.428  | 0.67802 | 0.787 | -6.48 | -0.4302 | none |
| GRB10   | -0.076 | 0.0371  | -0.428 | 0.67828 | 0.787 | -6.48 | -0.0407 | none |
| PZP     | -0.046 | 0.0079  | -0.427 | 0.67857 | 0.787 | -6.48 | 1.75348 | none |
| NTM     | -0.06  | 0.0213  | -0.427 | 0.67872 | 0.787 | -6.48 | 0.5238  | none |
| FBXO31  | 0.125  | 0.2497  | 0.4268 | 0.6789  | 0.788 | -6.48 | -0.598  | none |
| ATAT1   | -0.053 | -0.0293 | -0.427 | 0.67906 | 0.788 | -6.48 | -0.3271 | none |
| ART1    | 0.036  | 0.0185  | 0.4263 | 0.67923 | 0.788 | -6.48 | -0.7668 | none |
| MAPRE2  | -0.078 | 0.0109  | -0.426 | 0.67925 | 0.788 | -6.48 | 1.05072 | none |
| TNFAIP8 | -0.032 | -0.0844 | -0.426 | 0.67929 | 0.788 | -6.48 | 0.7452  | none |
| SPTSSA  | 0.058  | -0.0889 | 0.4261 | 0.67936 | 0.788 | -6.48 | 0.08651 | none |
| EIF3E   | 0.048  | -0.0478 | 0.426  | 0.67942 | 0.788 | -6.48 | -0.3361 | none |
| ERICH6B | 0.127  | 0.2036  | 0.4254 | 0.67989 | 0.788 | -6.48 | 0.71721 | none |
| PPT2    | 0.106  | 0.0822  | 0.4252 | 0.67999 | 0.788 | -6.48 | 1.23322 | none |
| HTRA3   | -0.029 | -0.0104 | -0.425 | 0.68008 | 0.788 | -6.48 | 0.07215 | none |
| EIF4E2  | -0.062 | -0.0867 | -0.425 | 0.68008 | 0.788 | -6.48 | 0.16722 | none |
| RGL1    | 0.036  | 0.0537  | 0.4249 | 0.6802  | 0.789 | -6.48 | 1.50673 | none |
| MRPL38  | 0.05   | 0.0657  | 0.4248 | 0.68026 | 0.789 | -6.48 | 0.39828 | none |
| PTGFRN  | 0.065  | 0.1253  | 0.4248 | 0.68027 | 0.789 | -6.48 | -0.6356 | none |
| SPATA4  | 0.042  | 0.0271  | 0.4248 | 0.68032 | 0.789 | -6.48 | -0.2038 | none |
| TBC1D1  | 0.058  | 0.0608  | 0.4243 | 0.68062 | 0.789 | -6.48 | -0.6722 | none |
| AQP1    | 0.044  | 0.0327  | 0.4243 | 0.68066 | 0.789 | -6.48 | 0.22162 | none |
| ZNF467  | 0.037  | 0.0319  | 0.4242 | 0.68072 | 0.789 | -6.48 | 0.4356  | none |
| CAMK2N2 | -0.03  | -0.0261 | -0.424 | 0.68111 | 0.789 | -6.48 | 0.36909 | none |
| LHX4    | -0.036 | -0.0252 | -0.423 | 0.68121 | 0.789 | -6.48 | 1.03129 | none |
| TMEM120 | -0.092 | -0.1042 | -0.423 | 0.68138 | 0.789 | -6.48 | 1.27627 | none |
| JCHAIN  | -0.13  | -0.1054 | -0.423 | 0.68138 | 0.789 | -6.48 | 0.92051 | none |
| RCN2    | 0.058  | 0.0467  | 0.423  | 0.68155 | 0.79  | -6.48 | 1.33944 | none |
| HSD17B3 | -0.049 | -0.0152 | -0.423 | 0.68177 | 0.79  | -6.48 | 1.64654 | none |
| TM2D2   | -0.071 | -0.132  | -0.423 | 0.68191 | 0.79  | -6.48 | 1.03389 | none |
| SGPP1   | -0.057 | -0.0973 | -0.422 | 0.68195 | 0.79  | -6.48 | 1.06754 | none |
| SPATA24 | -0.089 | -0.0209 | -0.422 | 0.68209 | 0.79  | -6.48 | 0.92366 | none |
| AURKB   | 0.04   | -0.0268 | 0.4222 | 0.68213 | 0.79  | -6.48 | 0.59081 | none |
| ESF1    | 0.117  | 0.2342  | 0.422  | 0.68224 | 0.79  | -6.48 | 1.27929 | none |
| STMN4   | -0.029 | -0.0269 | -0.422 | 0.68224 | 0.79  | -6.48 | -0.4587 | none |
| SCOC    | -0.06  | -0.1591 | -0.421 | 0.68271 | 0.79  | -6.48 | 0.11771 | none |
| CRIP1   | -0.075 | -0.1333 | -0.421 | 0.68278 | 0.79  | -6.48 | 0.42272 | none |
| GATA2   | -0.066 | -0.0349 | -0.421 | 0.68289 | 0.79  | -6.48 | 0.77675 | none |
| MPPED2  | -0.043 | -0.036  | -0.421 | 0.68292 | 0.79  | -6.48 | -0.0236 | none |



|           |        |         |        |         |       |       |         |      |
|-----------|--------|---------|--------|---------|-------|-------|---------|------|
| OIP5      | -0.059 | -0.1016 | -0.421 | 0.68294 | 0.79  | -6.48 | 0.33961 | none |
| JUP       | -0.054 | -0.0467 | -0.421 | 0.68312 | 0.791 | -6.48 | -0.7193 | none |
| ERG       | 0.03   | 0.0541  | 0.4206 | 0.68326 | 0.791 | -6.48 | -0.8365 | none |
| TERF2IP   | 0.035  | 0.0267  | 0.4198 | 0.68382 | 0.791 | -6.48 | 0.68608 | none |
| CISH      | -0.044 | -0.0566 | -0.42  | 0.68387 | 0.791 | -6.48 | 1.73974 | none |
| KDM7A     | 0.083  | 0.1101  | 0.4197 | 0.68387 | 0.791 | -6.48 | -0.1284 | none |
| PLSCR2    | 0.048  | -0.0039 | 0.4196 | 0.68394 | 0.791 | -6.48 | 0.2184  | none |
| SYCE1     | 0.045  | 0.0919  | 0.4194 | 0.68407 | 0.791 | -6.48 | 0.25377 | none |
| XRN2      | 0.051  | 0.0658  | 0.4194 | 0.68412 | 0.791 | -6.48 | 1.41227 | none |
| PFKL      | 0.045  | 0.0755  | 0.4193 | 0.68418 | 0.791 | -6.48 | 1.1734  | none |
| IL24      | -0.083 | -0.1047 | -0.419 | 0.68432 | 0.792 | -6.48 | -0.2377 | none |
| OPLAH     | -0.067 | -0.0784 | -0.419 | 0.68439 | 0.792 | -6.48 | 1.0576  | none |
| ENGASE    | 0.073  | 0.0736  | 0.4189 | 0.68443 | 0.792 | -6.48 | -0.3679 | none |
| CSNK2B    | 0.085  | -0.0143 | 0.4189 | 0.68447 | 0.792 | -6.48 | -0.0178 | none |
| LNP1      | -0.043 | -0.0187 | -0.419 | 0.68455 | 0.792 | -6.48 | 1.74229 | none |
| UBE2D2    | -0.05  | -0.112  | -0.419 | 0.68467 | 0.792 | -6.48 | 1.3361  | none |
| IP6K3     | 0.029  | 0.036   | 0.4186 | 0.68467 | 0.792 | -6.48 | -0.8455 | none |
| JADE3     | -0.055 | 0.0052  | -0.419 | 0.68473 | 0.792 | -6.48 | 0.86628 | none |
| TAS1R1    | -0.051 | -0.0122 | -0.418 | 0.68477 | 0.792 | -6.48 | 1.24935 | none |
| THEM6     | -0.042 | -0.0624 | -0.418 | 0.68508 | 0.792 | -6.48 | 1.77596 | none |
| DEUP1     | 0.03   | 0.0267  | 0.4179 | 0.68517 | 0.792 | -6.48 | -0.8842 | none |
| ARPC5L    | 0.033  | 0.045   | 0.4179 | 0.68517 | 0.792 | -6.48 | 0.60716 | none |
| AWAT1     | -0.068 | -0.0169 | -0.418 | 0.68519 | 0.792 | -6.48 | 1.7235  | none |
| PPP3R1    | 0.071  | -0.0278 | 0.4178 | 0.68523 | 0.792 | -6.48 | 1.26832 | none |
| GLE1      | 0.086  | 0.1683  | 0.4178 | 0.68526 | 0.792 | -6.48 | 0.97911 | none |
| FNDC10    | 0.036  | -0.0245 | 0.4177 | 0.68533 | 0.792 | -6.48 | 0.35625 | none |
| CIB3      | -0.05  | -0.0022 | -0.417 | 0.68548 | 0.792 | -6.48 | 1.0129  | none |
| SLC22A15  | 0.037  | 0.0471  | 0.4173 | 0.68557 | 0.792 | -6.48 | 1.27404 | none |
| PDE4B     | -0.072 | -0.1417 | -0.417 | 0.68567 | 0.792 | -6.48 | -0.6558 | none |
| KRTAP29-1 | 0.028  | 0.0226  | 0.4172 | 0.68567 | 0.792 | -6.48 | 0       | none |
| SESN2     | -0.049 | #####   | -0.417 | 0.68603 | 0.792 | -6.48 | 1.40997 | none |
| LIM2      | -0.03  | -0.0264 | -0.417 | 0.68612 | 0.792 | -6.48 | -0.1497 | none |
| SIX3      | 0.036  | 0.0041  | 0.4165 | 0.68613 | 0.792 | -6.48 | -0.0156 | none |
| PALM2-AK  | -0.032 | -0.0149 | -0.416 | 0.68617 | 0.792 | -6.48 | 1.15957 | none |
| RDX       | 0.086  | 0.1796  | 0.4162 | 0.68639 | 0.793 | -6.48 | 0.53195 | none |
| ICOS      | -0.052 | -0.0445 | -0.416 | 0.68641 | 0.793 | -6.48 | 0.72846 | none |
| SFTPD     | 0.039  | 0.0747  | 0.416  | 0.68652 | 0.793 | -6.48 | 0.33059 | none |
| PBX4      | -0.069 | 0.0099  | -0.416 | 0.68662 | 0.793 | -6.48 | 0.67073 | none |
| PP2D1     | 0.032  | 0.0446  | 0.4156 | 0.68676 | 0.793 | -6.48 | 0.83987 | none |
| HPGDS     | -0.042 | 0.0239  | -0.415 | 0.68686 | 0.793 | -6.48 | 1.80598 | none |

|          |        |         |        |         |       |       |         |      |
|----------|--------|---------|--------|---------|-------|-------|---------|------|
| LDHAL6B  | -0.035 | -0.0153 | -0.415 | 0.68711 | 0.793 | -6.48 | -0.3836 | none |
| PKMYT1   | 0.04   | 0.05    | 0.415  | 0.6872  | 0.793 | -6.48 | 0.69968 | none |
| ZNF730   | 0.054  | 0.0705  | 0.4149 | 0.68725 | 0.793 | -6.48 | 1.14122 | none |
| REEP4    | -0.046 | -0.071  | -0.415 | 0.68729 | 0.793 | -6.48 | 1.51923 | none |
| PPEF1    | 0.067  | -0.0074 | 0.4149 | 0.68731 | 0.793 | -6.48 | -1.0305 | none |
| CIDEB    | 0.112  | 0.1137  | 0.4147 | 0.68741 | 0.793 | -6.48 | 0.19741 | none |
| TCP10L   | 0.057  | 0.0237  | 0.4145 | 0.68754 | 0.793 | -6.48 | 0.96274 | none |
| TNFSF8   | -0.076 | -0.0327 | -0.414 | 0.68762 | 0.793 | -6.48 | -0.1231 | none |
| LAMP2    | -0.063 | -0.1841 | -0.414 | 0.68764 | 0.793 | -6.48 | 0.52247 | none |
| SLAIN1   | 0.048  | -0.0396 | 0.4144 | 0.68765 | 0.793 | -6.48 | 0.78691 | none |
| B3GAT1   | 0.04   | 0.0181  | 0.4143 | 0.68772 | 0.793 | -6.48 | 0.7154  | none |
| NR2F1    | 0.028  | 0.037   | 0.414  | 0.68796 | 0.794 | -6.48 | -0.7324 | none |
| KCNJ10   | -0.029 | -0.0177 | -0.414 | 0.68824 | 0.794 | -6.48 | 0.79355 | none |
| H2AFB1   | 0.058  | 0.0385  | 0.4135 | 0.68829 | 0.794 | -6.48 | 1.29734 | none |
| LMBR1    | 0.054  | -0.052  | 0.4129 | 0.68866 | 0.794 | -6.48 | 0.35771 | none |
| MYLK2    | 0.029  | 0.0293  | 0.4127 | 0.68884 | 0.794 | -6.48 | -0.2847 | none |
| C1ORF87  | -0.048 | -0.0476 | -0.412 | 0.68906 | 0.795 | -6.48 | -0.1147 | none |
| MMS19    | -0.029 | 0.0093  | -0.412 | 0.68948 | 0.795 | -6.48 | 0.06136 | none |
| TXNL4A   | -0.056 | -0.0442 | -0.411 | 0.68996 | 0.795 | -6.48 | 0.29303 | none |
| CTTN     | 0.092  | 0.1747  | 0.4107 | 0.69024 | 0.796 | -6.48 | -0.5628 | none |
| DHFR     | -0.063 | -0.0277 | -0.41  | 0.69058 | 0.796 | -6.48 | 0.366   | none |
| SLC16A14 | -0.05  | 0.0223  | -0.41  | 0.69063 | 0.796 | -6.48 | 1.53994 | none |
| RAPH1    | 0.058  | 0.0162  | 0.4096 | 0.69102 | 0.796 | -6.48 | 0.04364 | none |
| PXK      | -0.051 | 0.0377  | -0.41  | 0.69103 | 0.796 | -6.48 | 1.23405 | none |
| PAK1IP1  | 0.055  | 0.1024  | 0.409  | 0.69143 | 0.797 | -6.48 | 0.55589 | none |
| ATRN     | 0.064  | 0.154   | 0.4088 | 0.6916  | 0.797 | -6.48 | 0.36039 | none |
| ASAP2    | 0.036  | 0.05    | 0.4087 | 0.69171 | 0.797 | -6.48 | 0.8419  | none |
| NHEJ1    | -0.037 | -0.1271 | -0.409 | 0.69173 | 0.797 | -6.48 | 0.90559 | none |
| SLC22A2  | -0.041 | -0.0677 | -0.409 | 0.69178 | 0.797 | -6.48 | 0.47409 | none |
| CR1L     | 0.03   | 0.0288  | 0.4085 | 0.69185 | 0.797 | -6.48 | -0.035  | none |
| HIST2H2A | -0.285 | -0.1525 | -0.408 | 0.69223 | 0.797 | -6.48 | 0.60113 | none |
| TCHHL1   | -0.027 | -0.0127 | -0.407 | 0.69263 | 0.798 | -6.48 | 0       | none |
| HOXA4    | 0.029  | 0.0472  | 0.4073 | 0.69265 | 0.798 | -6.48 | 0.35721 | none |
| RRAGD    | -0.064 | -0.0807 | -0.407 | 0.69312 | 0.798 | -6.48 | 0.13312 | none |
| CMTM3    | -0.064 | -0.0319 | -0.406 | 0.69327 | 0.798 | -6.48 | 1.20798 | none |
| NUPR2    | -0.059 | -0.1319 | -0.406 | 0.6933  | 0.798 | -6.48 | 1.44797 | none |
| SNRNP70  | 0.078  | 0.1932  | 0.4062 | 0.69349 | 0.798 | -6.48 | 0.5864  | none |
| GNG2     | -0.048 | -0.1223 | -0.406 | 0.6935  | 0.798 | -6.48 | 1.374   | none |
| KLRG1    | -0.067 | -0.1294 | -0.406 | 0.69356 | 0.799 | -6.48 | 0.21487 | none |
| TMED7    | 0.048  | -0.0059 | 0.406  | 0.69361 | 0.799 | -6.48 | 1.53638 | none |

|           |        |         |        |         |       |       |         |      |
|-----------|--------|---------|--------|---------|-------|-------|---------|------|
| KCNV1     | 0.033  | 0.0439  | 0.4057 | 0.6938  | 0.799 | -6.48 | 0.27251 | none |
| TSNAX-DIS | 0.033  | 0.0371  | 0.4056 | 0.69391 | 0.799 | -6.48 | 1.34812 | none |
| TNXB      | 0.049  | 0.0454  | 0.4054 | 0.69404 | 0.799 | -6.49 | 1.13566 | none |
| TRMT6     | -0.064 | 0.0063  | -0.405 | 0.69405 | 0.799 | -6.49 | 0.78209 | none |
| MRPS18C   | 0.062  | -0.0464 | 0.4054 | 0.69405 | 0.799 | -6.49 | -0.4341 | none |
| TEX15     | 0.146  | 0.0961  | 0.4051 | 0.69423 | 0.799 | -6.49 | 0.84519 | none |
| GRN       | -0.046 | -0.0141 | -0.405 | 0.69425 | 0.799 | -6.49 | 0.2719  | none |
| MAPK1     | 0.046  | -0.0068 | 0.405  | 0.69428 | 0.799 | -6.49 | -0.4544 | none |
| PPT2-EGFL | -0.061 | 0.0131  | -0.405 | 0.69437 | 0.799 | -6.49 | 1.89156 | none |
| TRPV6     | -0.05  | 0.0213  | -0.405 | 0.69439 | 0.799 | -6.49 | 1.39011 | none |
| ACAA1     | 0.042  | 0.0106  | 0.4047 | 0.69455 | 0.799 | -6.49 | 0.34932 | none |
| C2CD2     | 0.069  | 0.0361  | 0.4046 | 0.69458 | 0.799 | -6.49 | 0.06263 | none |
| SKP2      | 0.049  | -0.0146 | 0.4044 | 0.69472 | 0.799 | -6.49 | -0.5641 | none |
| VARS      | 0.063  | 0.1112  | 0.4042 | 0.69488 | 0.799 | -6.49 | -0.0169 | none |
| CTPS2     | 0.061  | 0.1053  | 0.404  | 0.695   | 0.799 | -6.49 | 0.79612 | none |
| SLC22A18  | -0.048 | -0.0582 | -0.404 | 0.69518 | 0.799 | -6.49 | -0.4378 | none |
| LMF1      | -0.043 | -0.0669 | -0.403 | 0.69538 | 0.8   | -6.49 | 0.09747 | none |
| CAMK1G    | -0.06  | -0.0915 | -0.403 | 0.69553 | 0.8   | -6.49 | 0.36593 | none |
| NR2E3     | 0.047  | 0.0816  | 0.4026 | 0.69602 | 0.8   | -6.49 | 1.05982 | none |
| RRP8      | -0.04  | 0.0095  | -0.403 | 0.69606 | 0.8   | -6.49 | 1.26422 | none |
| GORASP2   | 0.04   | 0.0684  | 0.4021 | 0.69637 | 0.801 | -6.49 | 0.37312 | none |
| TMEM178   | -0.052 | -0.0122 | -0.402 | 0.69652 | 0.801 | -6.49 | 1.05754 | none |
| PTER      | -0.04  | -0.0487 | -0.402 | 0.69663 | 0.801 | -6.49 | 0.81549 | none |
| GPR68     | -0.059 | -0.0373 | -0.402 | 0.69677 | 0.801 | -6.49 | 0.87387 | none |
| TTL12     | 0.041  | 0.0995  | 0.4014 | 0.69688 | 0.801 | -6.49 | 0.59341 | none |
| MYRIP     | 0.037  | 0.0526  | 0.4014 | 0.69689 | 0.801 | -6.49 | 0.27725 | none |
| RPL36AL   | -0.048 | -0.1055 | -0.401 | 0.69697 | 0.801 | -6.49 | -0.4032 | none |
| SH3BGR    | -0.055 | -0.0808 | -0.401 | 0.69707 | 0.801 | -6.49 | 1.31806 | none |
| MAGED2    | -0.046 | -0.029  | -0.401 | 0.69748 | 0.801 | -6.49 | 0.95495 | none |
| FRMD3     | 0.038  | 0.074   | 0.4005 | 0.6975  | 0.801 | -6.49 | 1.16102 | none |
| SSSCA1    | -0.052 | -0.0506 | -0.4   | 0.69796 | 0.802 | -6.49 | 0.02942 | none |
| MAGEL2    | -0.028 | -0.0095 | -0.4   | 0.69805 | 0.802 | -6.49 | 0       | none |
| AGFG1     | 0.077  | 0.045   | 0.3997 | 0.69809 | 0.802 | -6.49 | -0.2482 | none |
| WNT3      | 0.045  | 0.0689  | 0.3995 | 0.69819 | 0.802 | -6.49 | -0.3454 | none |
| PLTP      | -0.05  | -0.0186 | -0.399 | 0.69831 | 0.802 | -6.49 | 0.87796 | none |
| CFD       | 0.038  | 0.0084  | 0.3992 | 0.69846 | 0.802 | -6.49 | -0.4642 | none |
| ALKBH2    | 0.04   | -0.0256 | 0.3991 | 0.69848 | 0.802 | -6.49 | 0.39987 | none |
| IL2RA     | 0.072  | 0.1911  | 0.399  | 0.69858 | 0.802 | -6.49 | 0.43675 | none |
| FSCN1     | 0.088  | 0.052   | 0.399  | 0.69859 | 0.802 | -6.49 | 1.04187 | none |
| C3ORF38   | -0.06  | -0.0904 | -0.399 | 0.69869 | 0.802 | -6.49 | 0.64192 | none |

|           |        |         |        |         |       |       |         |      |
|-----------|--------|---------|--------|---------|-------|-------|---------|------|
| TCEAL7    | 0.03   | 0.0274  | 0.3988 | 0.69872 | 0.802 | -6.49 | 0.53922 | none |
| PMP22     | -0.071 | -0.0823 | -0.399 | 0.69882 | 0.802 | -6.49 | -0.0268 | none |
| IGSF8     | 0.044  | 0.0014  | 0.3986 | 0.69889 | 0.802 | -6.49 | 0.65027 | none |
| NPM1      | -0.042 | 0.0111  | -0.398 | 0.69893 | 0.802 | -6.49 | 0.00287 | none |
| PPP1R3A   | -0.032 | -0.0316 | -0.398 | 0.69911 | 0.802 | -6.49 | 0.99777 | none |
| CCM2L     | 0.029  | 0.0342  | 0.3968 | 0.70018 | 0.803 | -6.49 | 0       | none |
| GIMAP7    | -0.049 | -0.1091 | -0.397 | 0.7002  | 0.803 | -6.49 | 0.51757 | none |
| GFPT2     | 0.096  | 0.1276  | 0.3967 | 0.70021 | 0.803 | -6.49 | 0.30284 | none |
| CXCL11    | 0.032  | 0.0334  | 0.3967 | 0.70023 | 0.803 | -6.49 | 1.46056 | none |
| SLC38A5   | -0.058 | -0.0702 | -0.397 | 0.70024 | 0.803 | -6.49 | 0.09993 | none |
| HYI       | 0.114  | -0.0245 | 0.3965 | 0.70039 | 0.804 | -6.49 | 0.23552 | none |
| SLC35A1   | -0.034 | -0.1028 | -0.396 | 0.70056 | 0.804 | -6.49 | 1.05002 | none |
| RNF183    | 0.044  | 0.0276  | 0.3958 | 0.70085 | 0.804 | -6.49 | 1.44643 | none |
| STK32B    | 0.03   | 0.0356  | 0.3957 | 0.70093 | 0.804 | -6.49 | 1.92528 | none |
| SH3RF3    | -0.028 | 0.0124  | -0.395 | 0.70114 | 0.804 | -6.49 | 0.49373 | none |
| MEP1B     | 0.036  | 0.0709  | 0.3953 | 0.70119 | 0.804 | -6.49 | 0.6798  | none |
| CTU1      | 0.06   | 0.0349  | 0.3952 | 0.70129 | 0.804 | -6.49 | 0.22503 | none |
| HCLS1     | 0.048  | 0.0689  | 0.395  | 0.70144 | 0.804 | -6.49 | 0.39683 | none |
| TMEM176   | 0.03   | 0.0207  | 0.3949 | 0.70149 | 0.804 | -6.49 | 0.7208  | none |
| PREX1     | 0.064  | 0.1534  | 0.3949 | 0.70151 | 0.804 | -6.49 | 0.56206 | none |
| MCM2      | 0.054  | 0.1341  | 0.3941 | 0.70204 | 0.805 | -6.49 | 0.99155 | none |
| GNAT2     | 0.04   | 0.0434  | 0.3941 | 0.70209 | 0.805 | -6.49 | 0.87947 | none |
| PPP2R1A   | 0.04   | 0.0657  | 0.394  | 0.70216 | 0.805 | -6.49 | 0.97666 | none |
| SLC51B    | 0.032  | 0.0295  | 0.3938 | 0.70226 | 0.805 | -6.49 | 1.17546 | none |
| RTEL1-TNF | 0.035  | 0.08    | 0.3927 | 0.70306 | 0.806 | -6.49 | 0.78577 | none |
| FAM189A   | 0.027  | 0.0429  | 0.3926 | 0.70311 | 0.806 | -6.49 | 0.30738 | none |
| NR112     | 0.04   | 0.0088  | 0.3925 | 0.70319 | 0.806 | -6.49 | 0.12553 | none |
| AC009977  | 0.042  | 0.0328  | 0.3924 | 0.70326 | 0.806 | -6.49 | -0.7269 | none |
| CPA3      | -0.044 | -0.0638 | -0.392 | 0.70369 | 0.806 | -6.49 | 0.52869 | none |
| CENPU     | 0.082  | 0.1331  | 0.3917 | 0.70376 | 0.806 | -6.49 | 0.70724 | none |
| ZBTB18    | 0.035  | 0.0601  | 0.3915 | 0.70394 | 0.807 | -6.49 | 0.01715 | none |
| PYDC1     | -0.091 | -0.1174 | -0.391 | 0.70421 | 0.807 | -6.49 | 1.76417 | none |
| TRIM9     | -0.03  | -0.0357 | -0.391 | 0.70432 | 0.807 | -6.49 | 1.71273 | none |
| BBS10     | -0.031 | -0.0656 | -0.391 | 0.7046  | 0.807 | -6.49 | 0.71084 | none |
| C17ORF64  | -0.033 | -0.0217 | -0.391 | 0.70462 | 0.807 | -6.49 | -0.6339 | none |
| C17ORF97  | 0.041  | 0.0598  | 0.3901 | 0.70493 | 0.807 | -6.49 | 0.56801 | none |
| NROB2     | 0.033  | 0.0431  | 0.39   | 0.70502 | 0.807 | -6.49 | -0.0449 | none |
| ZNF664    | 0.033  | -0.0362 | 0.39   | 0.70502 | 0.807 | -6.49 | -0.2656 | none |
| HPX       | -0.123 | -0.0265 | -0.39  | 0.70511 | 0.807 | -6.49 | 0.15941 | none |
| CBR4      | 0.068  | -0.0363 | 0.3894 | 0.70547 | 0.808 | -6.49 | -0.1687 | none |

|          |        |         |        |         |       |       |         |      |
|----------|--------|---------|--------|---------|-------|-------|---------|------|
| CFAP45   | 0.05   | 0.0766  | 0.3892 | 0.70556 | 0.808 | -6.49 | 0.33533 | none |
| AZI2     | 0.071  | 0.0914  | 0.3891 | 0.70564 | 0.808 | -6.49 | 1.6736  | none |
| CALU     | -0.058 | -0.0458 | -0.389 | 0.70585 | 0.808 | -6.49 | 1.47369 | none |
| PRMT3    | -0.04  | -0.0523 | -0.389 | 0.70594 | 0.808 | -6.49 | 1.87514 | none |
| SLC16A7  | 0.059  | -0.0203 | 0.3885 | 0.70607 | 0.808 | -6.49 | 1.0326  | none |
| RSPH6A   | 0.039  | 0.0066  | 0.3883 | 0.70625 | 0.808 | -6.49 | -1.1285 | none |
| CCDC58   | 0.046  | 0.0131  | 0.3882 | 0.70632 | 0.808 | -6.49 | 0.30574 | none |
| YIPF4    | 0.074  | -0.1003 | 0.388  | 0.70645 | 0.808 | -6.49 | 0.44606 | none |
| INSIG2   | 0.071  | -0.0061 | 0.3879 | 0.70648 | 0.808 | -6.49 | 0.29686 | none |
| USP17L11 | -0.09  | -0.0939 | -0.388 | 0.70651 | 0.808 | -6.49 | 0.77146 | none |
| TEX22    | 0.081  | 0.0586  | 0.3877 | 0.70663 | 0.808 | -6.49 | -0.6422 | none |
| RD3L     | 0.031  | 0.0305  | 0.3877 | 0.70667 | 0.808 | -6.49 | -0.5388 | none |
| CCNI2    | -0.088 | -0.0205 | -0.388 | 0.70677 | 0.809 | -6.49 | 0.41891 | none |
| BAIAP2   | 0.073  | 0.0961  | 0.3871 | 0.70705 | 0.809 | -6.49 | 0.63334 | none |
| TIMM8A   | 0.059  | 0.0303  | 0.3869 | 0.70719 | 0.809 | -6.49 | -0.3698 | none |
| ACER3    | 0.06   | 0.0023  | 0.3867 | 0.70733 | 0.809 | -6.49 | -0.234  | none |
| CHRNA9   | 0.035  | 0.0275  | 0.3864 | 0.70756 | 0.809 | -6.49 | 0.74028 | none |
| PSMC4    | 0.032  | 0.0123  | 0.3864 | 0.70759 | 0.809 | -6.49 | 0.80341 | none |
| MMP10    | 0.036  | 0.0249  | 0.386  | 0.7079  | 0.809 | -6.49 | 1.17321 | none |
| CRLF1    | -0.065 | 0.0243  | -0.386 | 0.70794 | 0.809 | -6.49 | -0.1087 | none |
| ALAS1    | -0.033 | 0.0099  | -0.386 | 0.70801 | 0.81  | -6.49 | 0.65225 | none |
| CLEC2B   | -0.06  | -0.1985 | -0.386 | 0.7081  | 0.81  | -6.49 | 0.83977 | none |
| FGF9     | 0.054  | 0.0143  | 0.385  | 0.70857 | 0.81  | -6.49 | 0.31382 | none |
| PCGF2    | -0.026 | -0.0135 | -0.385 | 0.7086  | 0.81  | -6.49 | 1.51348 | none |
| TRIM39   | 0.055  | 0.0929  | 0.3849 | 0.70863 | 0.81  | -6.49 | 0.54615 | none |
| MAP6     | 0.026  | 0.0271  | 0.3844 | 0.70899 | 0.81  | -6.49 | -0.6441 | none |
| CLEC11A  | 0.059  | 0.0314  | 0.3844 | 0.70899 | 0.81  | -6.49 | 1.21284 | none |
| VPS26A   | -0.064 | -0.0762 | -0.384 | 0.70904 | 0.81  | -6.49 | 1.35033 | none |
| KIFC1    | -0.052 | 0.0312  | -0.384 | 0.70904 | 0.81  | -6.49 | 1.50888 | none |
| EZH2     | 0.063  | 0.1454  | 0.3843 | 0.70908 | 0.81  | -6.49 | 0.56726 | none |
| CTAG2    | -0.032 | -0.0385 | -0.384 | 0.70927 | 0.81  | -6.49 | 1.25984 | none |
| KIRREL2  | -0.028 | 0.0042  | -0.384 | 0.7093  | 0.81  | -6.49 | 0.18413 | none |
| BPIFA1   | -0.04  | -0.0404 | -0.384 | 0.70934 | 0.81  | -6.49 | 0.89019 | none |
| SLC2A1   | -0.045 | -0.049  | -0.384 | 0.70951 | 0.81  | -6.49 | 1.0253  | none |
| PLEKHO1  | -0.084 | -0.0324 | -0.384 | 0.70954 | 0.81  | -6.49 | 0.52638 | none |
| CHP2     | 0.03   | 0.082   | 0.3836 | 0.70956 | 0.81  | -6.49 | 1.98387 | none |
| HBEGF    | -0.055 | 0.0286  | -0.384 | 0.70963 | 0.81  | -6.49 | 1.47719 | none |
| CFP      | 0.044  | 0.0471  | 0.3833 | 0.70979 | 0.811 | -6.49 | 1.42735 | none |
| MMRN1    | -0.027 | -0.0263 | -0.383 | 0.70988 | 0.811 | -6.49 | 0.12253 | none |
| ALG2     | -0.06  | -0.0651 | -0.383 | 0.70988 | 0.811 | -6.49 | 1.35542 | none |

|          |        |         |        |         |       |       |         |      |
|----------|--------|---------|--------|---------|-------|-------|---------|------|
| TLX1     | 0.089  | 0.0886  | 0.3831 | 0.70997 | 0.811 | -6.49 | -0.3767 | none |
| ARMC2    | -0.1   | -0.0399 | -0.383 | 0.71001 | 0.811 | -6.49 | 0.47189 | none |
| AKIRIN2  | -0.039 | -0.084  | -0.383 | 0.71002 | 0.811 | -6.49 | 1.44297 | none |
| ABCG4    | 0.034  | 0.0663  | 0.3828 | 0.71016 | 0.811 | -6.49 | 1.3165  | none |
| CARD11   | 0.126  | 0.3576  | 0.3826 | 0.71031 | 0.811 | -6.49 | 0.36343 | none |
| PACSN1   | 0.058  | 0.0591  | 0.3825 | 0.71035 | 0.811 | -6.49 | 0.1111  | none |
| SLC10A6  | 0.038  | 0.0525  | 0.3825 | 0.71038 | 0.811 | -6.49 | -0.168  | none |
| LLPH     | 0.046  | 0.0412  | 0.3824 | 0.71046 | 0.811 | -6.49 | -0.1187 | none |
| NOTCH2   | 0.083  | 0.1815  | 0.3823 | 0.7105  | 0.811 | -6.49 | -0.2092 | none |
| ARL6     | 0.062  | -0.0233 | 0.3823 | 0.71051 | 0.811 | -6.49 | -0.7312 | none |
| LAMP3    | 0.055  | -0.0059 | 0.3823 | 0.71055 | 0.811 | -6.49 | -0.0036 | none |
| AOX1     | 0.03   | 0.0445  | 0.3822 | 0.71063 | 0.811 | -6.49 | 1.45201 | none |
| HDHD2    | 0.052  | 0.0089  | 0.382  | 0.71077 | 0.811 | -6.49 | 0.98379 | none |
| HNRNPK   | -0.036 | -0.0101 | -0.382 | 0.71079 | 0.811 | -6.49 | 0.10152 | none |
| TUNAR    | 0.03   | 0.0438  | 0.3819 | 0.7108  | 0.811 | -6.49 | -0.2788 | none |
| CNOT6    | -0.041 | -0.0465 | -0.382 | 0.71082 | 0.811 | -6.49 | -0.2621 | none |
| CCK      | 0.026  | 0.0241  | 0.3815 | 0.71108 | 0.811 | -6.5  | -0.6079 | none |
| PDZK1IP1 | -0.034 | -0.0036 | -0.381 | 0.71123 | 0.811 | -6.5  | -0.1396 | none |
| THG1L    | 0.067  | 0.0118  | 0.3812 | 0.7113  | 0.811 | -6.5  | -0.7251 | none |
| BUD13    | 0.049  | 0.0898  | 0.3809 | 0.71156 | 0.811 | -6.5  | 1.13805 | none |
| CCND1    | -0.1   | -0.1158 | -0.381 | 0.7117  | 0.812 | -6.5  | 1.44553 | none |
| MKNK2    | 0.038  | 0.1096  | 0.3805 | 0.71183 | 0.812 | -6.5  | -0.116  | none |
| OTOS     | 0.064  | 0.0642  | 0.38   | 0.7122  | 0.812 | -6.5  | 1.09964 | none |
| ATP2A1   | -0.06  | -0.0523 | -0.38  | 0.71224 | 0.812 | -6.5  | 0.14364 | none |
| PIWIL4   | 0.029  | 0.0374  | 0.3799 | 0.71227 | 0.812 | -6.5  | 1.28511 | none |
| AP3S2    | 0.077  | -0.0024 | 0.3798 | 0.71229 | 0.812 | -6.5  | -0.5013 | none |
| TBX20    | -0.041 | -0.0025 | -0.38  | 0.71237 | 0.812 | -6.5  | 1.04612 | none |
| OR4X1    | 0.04   | 0.0401  | 0.3793 | 0.71267 | 0.812 | -6.5  | -0.0076 | none |
| CSF1     | 0.079  | 0.2404  | 0.3792 | 0.71274 | 0.812 | -6.5  | 0.19541 | none |
| ZBTB46   | 0.041  | 0.1028  | 0.3792 | 0.71277 | 0.812 | -6.5  | 0.82132 | none |
| HEPACAM  | 0.036  | 0.0419  | 0.3791 | 0.71283 | 0.812 | -6.5  | 0.8214  | none |
| RASGEF1A | -0.052 | 0.007   | -0.379 | 0.71287 | 0.812 | -6.5  | -0.0083 | none |
| EFCAB8   | -0.078 | -0.0186 | -0.379 | 0.71288 | 0.812 | -6.5  | 1.02625 | none |
| HGF      | 0.027  | 0.0283  | 0.379  | 0.7129  | 0.812 | -6.5  | -0.4333 | none |
| F8A1     | -0.04  | 0.0283  | -0.378 | 0.71346 | 0.813 | -6.5  | -0.1162 | none |
| RIOK1    | 0.054  | 0.1177  | 0.378  | 0.71362 | 0.813 | -6.5  | 0.46425 | none |
| S100A14  | -0.026 | -0.0348 | -0.378 | 0.71369 | 0.813 | -6.5  | 0       | none |
| IRX6     | -0.026 | -0.0262 | -0.378 | 0.71384 | 0.813 | -6.5  | 0       | none |
| G3BP1    | 0.036  | 0.005   | 0.3774 | 0.71402 | 0.813 | -6.5  | 0.31141 | none |
| CROT     | -0.039 | -0.0625 | -0.377 | 0.71409 | 0.813 | -6.5  | 1.25692 | none |

|          |        |         |        |         |       |      |         |      |
|----------|--------|---------|--------|---------|-------|------|---------|------|
| CCNG1    | 0.044  | -0.0787 | 0.3773 | 0.71412 | 0.813 | -6.5 | 1.29614 | none |
| KRT12    | -0.043 | -0.0815 | -0.377 | 0.71417 | 0.813 | -6.5 | -0.7065 | none |
| OR51B4   | 0.042  | 0.063   | 0.3767 | 0.71451 | 0.814 | -6.5 | -0.1317 | none |
| ORC3     | -0.056 | -0.0419 | -0.376 | 0.71484 | 0.814 | -6.5 | 1.16606 | none |
| TSNAXIP1 | -0.072 | 0.0304  | -0.376 | 0.71503 | 0.814 | -6.5 | 1.27549 | none |
| KIF2C    | -0.048 | 0.0287  | -0.376 | 0.71526 | 0.814 | -6.5 | 0.64869 | none |
| KIF2A    | 0.078  | 0.1417  | 0.3756 | 0.71531 | 0.814 | -6.5 | 0.61501 | none |
| CDKL4    | 0.047  | 0.0254  | 0.3756 | 0.71534 | 0.814 | -6.5 | 1.63253 | none |
| LTF      | 0.074  | 0.0839  | 0.3748 | 0.71593 | 0.815 | -6.5 | -0.6586 | none |
| SERPINE2 | 0.034  | 0.0129  | 0.3746 | 0.71604 | 0.815 | -6.5 | 0.22001 | none |
| PEMT     | 0.055  | 0.0412  | 0.3745 | 0.71613 | 0.815 | -6.5 | 1.12378 | none |
| TPRA1    | -0.042 | -0.0442 | -0.374 | 0.71614 | 0.815 | -6.5 | 0.56278 | none |
| SLC26A6  | 0.037  | 0.0676  | 0.3743 | 0.71628 | 0.815 | -6.5 | 1.94331 | none |
| ZIC2     | 0.066  | 0.0671  | 0.3741 | 0.71641 | 0.815 | -6.5 | 1.22771 | none |
| CD300E   | -0.027 | -0.0177 | -0.374 | 0.71668 | 0.815 | -6.5 | 1.89954 | none |
| GPI      | -0.052 | -0.0077 | -0.374 | 0.71673 | 0.815 | -6.5 | 1.26231 | none |
| ATRAID   | -0.053 | -0.0975 | -0.373 | 0.71688 | 0.815 | -6.5 | 0.16927 | none |
| MAP1LC3E | -0.039 | -0.0747 | -0.373 | 0.71726 | 0.816 | -6.5 | 1.20013 | none |
| TFAP2C   | 0.044  | 0.0566  | 0.3729 | 0.71731 | 0.816 | -6.5 | 0.32553 | none |
| TBC1D5   | 0.113  | 0.1775  | 0.3724 | 0.71762 | 0.816 | -6.5 | 0.32342 | none |
| CTSO     | -0.084 | -0.195  | -0.372 | 0.71779 | 0.816 | -6.5 | 0.47776 | none |
| TOR1B    | 0.046  | 0.0151  | 0.3719 | 0.71803 | 0.817 | -6.5 | 0.7794  | none |
| CEP44    | 0.045  | -0.0712 | 0.3717 | 0.71813 | 0.817 | -6.5 | 0.44251 | none |
| CNOT11   | -0.029 | -0.0408 | -0.371 | 0.71855 | 0.817 | -6.5 | 0.98694 | none |
| TSG101   | 0.042  | 0.024   | 0.3706 | 0.71891 | 0.817 | -6.5 | 0.29952 | none |
| HECTD2   | 0.072  | 0.068   | 0.3705 | 0.71902 | 0.817 | -6.5 | 0.92324 | none |
| TMEM64   | 0.062  | -0.0323 | 0.3702 | 0.71923 | 0.818 | -6.5 | 0.85512 | none |
| DMRTC1   | -0.03  | -0.0325 | -0.37  | 0.71925 | 0.818 | -6.5 | 1.21117 | none |
| BCCIP    | -0.028 | -0.0022 | -0.37  | 0.71954 | 0.818 | -6.5 | 0.58061 | none |
| CCDC13   | 0.134  | 0.1671  | 0.3697 | 0.71962 | 0.818 | -6.5 | 0.37635 | none |
| APOC2    | 0.053  | -0.0129 | 0.3695 | 0.7197  | 0.818 | -6.5 | -0.501  | none |
| MSRB2    | 0.057  | 0.025   | 0.3694 | 0.71978 | 0.818 | -6.5 | 0.01578 | none |
| C1ORF94  | -0.026 | -0.0259 | -0.369 | 0.71982 | 0.818 | -6.5 | 1.85582 | none |
| NANP     | -0.054 | -0.0426 | -0.369 | 0.71991 | 0.818 | -6.5 | 1.33189 | none |
| TRIM8    | 0.077  | 0.1527  | 0.3683 | 0.72057 | 0.819 | -6.5 | 0.18329 | none |
| TEX19    | -0.03  | -0.0254 | -0.368 | 0.72077 | 0.819 | -6.5 | 0.34774 | none |
| B3GALT6  | 0.059  | 0.0536  | 0.3677 | 0.72102 | 0.819 | -6.5 | -0.5827 | none |
| PTDSS1   | -0.052 | -0.1142 | -0.368 | 0.72103 | 0.819 | -6.5 | -0.2083 | none |
| FOXF2    | -0.025 | -0.0238 | -0.367 | 0.72134 | 0.819 | -6.5 | -0.5423 | none |
| TFAP2E   | 0.032  | 0.0564  | 0.3672 | 0.72141 | 0.819 | -6.5 | 1.19666 | none |

|          |        |         |        |         |       |      |         |      |
|----------|--------|---------|--------|---------|-------|------|---------|------|
| BACE2    | 0.056  | 0.0039  | 0.3671 | 0.72145 | 0.819 | -6.5 | 0.13409 | none |
| CHRNA1   | 0.025  | 0.0309  | 0.3671 | 0.72145 | 0.819 | -6.5 | 0       | none |
| MFSD5    | 0.048  | -0.0253 | 0.3669 | 0.72159 | 0.819 | -6.5 | 0.62998 | none |
| OSM      | -0.053 | -0.014  | -0.367 | 0.72188 | 0.82  | -6.5 | 0.85223 | none |
| SPINT2   | -0.067 | -0.0747 | -0.366 | 0.72191 | 0.82  | -6.5 | 1.01313 | none |
| ZBTB9    | -0.107 | -0.1014 | -0.366 | 0.72194 | 0.82  | -6.5 | 0.6226  | none |
| DNAI1    | 0.042  | 0.091   | 0.3662 | 0.72214 | 0.82  | -6.5 | 1.51118 | none |
| TPX2     | 0.131  | 0.3263  | 0.3661 | 0.72218 | 0.82  | -6.5 | 0.52038 | none |
| DPP8     | 0.069  | 0.0942  | 0.3657 | 0.72245 | 0.82  | -6.5 | -0.0669 | none |
| RGPD8    | -0.081 | 0.0767  | -0.366 | 0.72248 | 0.82  | -6.5 | 0.75863 | none |
| FAM160A  | 0.026  | 0.031   | 0.3655 | 0.72264 | 0.82  | -6.5 | 1.81031 | none |
| DUSP23   | -0.064 | -0.0737 | -0.365 | 0.72272 | 0.82  | -6.5 | 0.67544 | none |
| RBMXL1   | 0.059  | 0.0861  | 0.3653 | 0.7228  | 0.82  | -6.5 | 1.02821 | none |
| PRSS48   | -0.039 | -0.0386 | -0.365 | 0.72288 | 0.82  | -6.5 | -0.233  | none |
| PLGLB2   | 0.056  | -0.0182 | 0.3649 | 0.72309 | 0.82  | -6.5 | 0.26226 | none |
| ST6GALNA | 0.029  | 0.0237  | 0.3648 | 0.72312 | 0.82  | -6.5 | -0.6745 | none |
| LPA      | -0.029 | -0.0199 | -0.364 | 0.72339 | 0.821 | -6.5 | 0.92621 | none |
| SLC15A3  | -0.051 | -0.0527 | -0.364 | 0.72341 | 0.821 | -6.5 | 1.18289 | none |
| MEX3B    | 0.027  | 0.05    | 0.3643 | 0.72348 | 0.821 | -6.5 | 1.62487 | none |
| PSMC3IP  | 0.041  | 0.1272  | 0.3643 | 0.7235  | 0.821 | -6.5 | -0.4788 | none |
| PTPRN2   | -0.03  | -0.015  | -0.364 | 0.72358 | 0.821 | -6.5 | 1.30347 | none |
| CENPP    | 0.037  | 0.0313  | 0.3638 | 0.72382 | 0.821 | -6.5 | 0.89907 | none |
| DESI1    | -0.047 | -0.0769 | -0.364 | 0.72385 | 0.821 | -6.5 | 1.01944 | none |
| MECOM    | 0.101  | 0.1451  | 0.3638 | 0.72387 | 0.821 | -6.5 | 0.93268 | none |
| NUAK1    | -0.038 | #####   | -0.364 | 0.72393 | 0.821 | -6.5 | -0.3611 | none |
| CPE      | 0.059  | 0.1016  | 0.3635 | 0.72408 | 0.821 | -6.5 | 0.07411 | none |
| EHD1     | -0.039 | -0.0299 | -0.363 | 0.72414 | 0.821 | -6.5 | 0.99643 | none |
| CEACAM2  | 0.031  | 0.0025  | 0.3626 | 0.72469 | 0.822 | -6.5 | 0.2341  | none |
| MED31    | 0.079  | -0.0424 | 0.3625 | 0.72478 | 0.822 | -6.5 | -0.304  | none |
| CBLC     | 0.029  | 0.0443  | 0.3624 | 0.72486 | 0.822 | -6.5 | 0.91162 | none |
| GUCY2D   | -0.025 | -0.0038 | -0.362 | 0.72492 | 0.822 | -6.5 | 0       | none |
| DMRTC1B  | 0.03   | 0.0193  | 0.3621 | 0.72508 | 0.822 | -6.5 | -0.1068 | none |
| SNAP47   | 0.026  | 0.0225  | 0.3619 | 0.7252  | 0.822 | -6.5 | 0.64466 | none |
| PRRT2    | 0.123  | 0.0522  | 0.3618 | 0.7253  | 0.822 | -6.5 | 0.6186  | none |
| EDN2     | -0.044 | 0.0036  | -0.361 | 0.72561 | 0.822 | -6.5 | 0.18495 | none |
| RARG     | -0.035 | -0.0044 | -0.361 | 0.72569 | 0.822 | -6.5 | 0.88498 | none |
| CISD2    | -0.055 | -0.1035 | -0.361 | 0.72569 | 0.822 | -6.5 | 1.28546 | none |
| SURF1    | -0.054 | -0.0704 | -0.361 | 0.72582 | 0.822 | -6.5 | 0.89663 | none |
| NAPRT    | -0.076 | -0.0905 | -0.361 | 0.72591 | 0.822 | -6.5 | 0.23855 | none |
| CD5      | 0.09   | 0.1835  | 0.3608 | 0.72602 | 0.822 | -6.5 | 0.8014  | none |



|          |        |         |        |         |       |       |         |      |
|----------|--------|---------|--------|---------|-------|-------|---------|------|
| GALT     | 0.039  | 0.0127  | 0.3607 | 0.72607 | 0.822 | -6.5  | 1.20763 | none |
| ADH6     | -0.046 | -0.0653 | -0.361 | 0.72617 | 0.822 | -6.5  | 1.19163 | none |
| STARD7   | 0.041  | -0.0338 | 0.3602 | 0.72648 | 0.823 | -6.5  | 1.20143 | none |
| KCNK15   | -0.03  | -0.0322 | -0.36  | 0.72653 | 0.823 | -6.5  | 1.17693 | none |
| PSMD9    | 0.046  | -0.0176 | 0.3598 | 0.72672 | 0.823 | -6.5  | -0.7583 | none |
| ACOD1    | -0.026 | -0.028  | -0.36  | 0.72674 | 0.823 | -6.5  | 0       | none |
| IL37     | 0.025  | 0.0334  | 0.3596 | 0.72689 | 0.823 | -6.5  | 0       | none |
| STAP1    | -0.068 | -0.0502 | -0.36  | 0.72696 | 0.823 | -6.5  | 1.22086 | none |
| TAF9B    | 0.037  | -0.0167 | 0.359  | 0.72735 | 0.823 | -6.5  | 0.07828 | none |
| EIF2B4   | 0.025  | 0.0587  | 0.3588 | 0.72744 | 0.823 | -6.5  | 1.01206 | none |
| FAM3C    | 0.044  | 0.1094  | 0.3587 | 0.72754 | 0.823 | -6.5  | 0.85188 | none |
| CAMK2B   | 0.066  | 0.0218  | 0.3582 | 0.72788 | 0.824 | -6.5  | 0.23942 | none |
| PROSER2  | -0.03  | -0.0097 | -0.358 | 0.72791 | 0.824 | -6.5  | -0.5517 | none |
| AGPAT5   | -0.07  | -0.0909 | -0.358 | 0.72796 | 0.824 | -6.5  | 0.91318 | none |
| HSFX1    | 0.038  | 0.017   | 0.3581 | 0.72801 | 0.824 | -6.5  | -0.6461 | none |
| ZNF697   | 0.025  | 0.0453  | 0.358  | 0.72806 | 0.824 | -6.5  | 0.50061 | none |
| PSKH1    | 0.052  | 0.1296  | 0.3579 | 0.72812 | 0.824 | -6.5  | 0.78316 | none |
| CNPY3    | -0.042 | -0.0162 | -0.358 | 0.72828 | 0.824 | -6.5  | 0.78379 | none |
| GPR32    | -0.032 | -0.0049 | -0.358 | 0.7283  | 0.824 | -6.5  | 0.21839 | none |
| GPS2     | 0.024  | 0.0633  | 0.3575 | 0.72844 | 0.824 | -6.5  | 0.09315 | none |
| LHX2     | -0.042 | -0.0452 | -0.357 | 0.72893 | 0.825 | -6.5  | 0.87164 | none |
| NEUROD1  | -0.024 | -0.0154 | -0.356 | 0.72914 | 0.825 | -6.5  | 0       | none |
| RABAC1   | 0.068  | -0.0243 | 0.3565 | 0.72917 | 0.825 | -6.5  | 0.48032 | none |
| CHTF18   | 0.064  | 0.162   | 0.3564 | 0.72922 | 0.825 | -6.5  | 0.98374 | none |
| LIPN     | -0.025 | -0.0415 | -0.356 | 0.7295  | 0.825 | -6.51 | 1.49939 | none |
| SLC25A22 | 0.036  | 0.0313  | 0.3558 | 0.72965 | 0.825 | -6.51 | 1.40134 | none |
| SCN5A    | -0.038 | 0.0071  | -0.356 | 0.72965 | 0.825 | -6.51 | 0.83989 | none |
| OPCML    | -0.026 | -0.0254 | -0.356 | 0.72966 | 0.825 | -6.51 | 1.94337 | none |
| GATA1    | -0.025 | -0.0174 | -0.356 | 0.72974 | 0.825 | -6.51 | 1.09507 | none |
| STX10    | 0.056  | -0.0017 | 0.3555 | 0.72988 | 0.825 | -6.51 | 0.10256 | none |
| CENPT    | 0.059  | 0.0617  | 0.3554 | 0.72994 | 0.825 | -6.51 | 0.83614 | none |
| ITLN1    | 0.026  | 0.0507  | 0.355  | 0.73022 | 0.825 | -6.51 | -0.5751 | none |
| EME2     | 0.059  | 0.0923  | 0.3549 | 0.73027 | 0.825 | -6.51 | -0.1221 | none |
| RBM4B    | 0.045  | -0.0011 | 0.3545 | 0.73057 | 0.826 | -6.51 | -0.4536 | none |
| GPR183   | 0.04   | -0.0991 | 0.3544 | 0.73063 | 0.826 | -6.51 | 0.30125 | none |
| BBS7     | 0.052  | 0.008   | 0.3544 | 0.73069 | 0.826 | -6.51 | 0.89662 | none |
| HSPA9    | 0.053  | 0.1374  | 0.3542 | 0.73081 | 0.826 | -6.51 | 1.14557 | none |
| C4B      | 0.106  | 0.0714  | 0.3542 | 0.73082 | 0.826 | -6.51 | 0.36241 | none |
| ADGRG6   | 0.033  | 0.0498  | 0.3541 | 0.73086 | 0.826 | -6.51 | 1.0219  | none |
| HADHA    | -0.068 | 0.0318  | -0.354 | 0.73099 | 0.826 | -6.51 | 1.15739 | none |

|           |        |         |        |         |       |       |         |      |
|-----------|--------|---------|--------|---------|-------|-------|---------|------|
| HSD17B11  | -0.09  | -0.2184 | -0.354 | 0.73102 | 0.826 | -6.51 | 0.64268 | none |
| TM7SF2    | 0.069  | #####   | 0.3536 | 0.73123 | 0.826 | -6.51 | 1.15606 | none |
| DND1      | -0.052 | -0.0681 | -0.354 | 0.7313  | 0.826 | -6.51 | 0.48981 | none |
| WFIKKN1   | -0.024 | -0.0074 | -0.353 | 0.73137 | 0.826 | -6.51 | -0.2294 | none |
| STAMBP    | -0.043 | -0.0309 | -0.353 | 0.73179 | 0.826 | -6.51 | 0.4918  | none |
| EFS       | -0.027 | -0.0221 | -0.353 | 0.73183 | 0.826 | -6.51 | 1.23425 | none |
| RHOV      | 0.026  | 0.0376  | 0.3526 | 0.73199 | 0.827 | -6.51 | 0.23513 | none |
| MAGEA2B   | 0.038  | 0.067   | 0.3524 | 0.7321  | 0.827 | -6.51 | 1.65244 | none |
| PDE9A     | -0.095 | 0.0099  | -0.352 | 0.73219 | 0.827 | -6.51 | 1.64639 | none |
| VWA3A     | -0.033 | -0.0322 | -0.352 | 0.7322  | 0.827 | -6.51 | 0.22359 | none |
| MRPL17    | 0.06   | 0.0129  | 0.3522 | 0.73222 | 0.827 | -6.51 | -0.8312 | none |
| GFER      | 0.054  | 0.0417  | 0.3516 | 0.73271 | 0.827 | -6.51 | 0.70076 | none |
| KIF26A    | 0.025  | 0.0289  | 0.3515 | 0.73275 | 0.827 | -6.51 | 0       | none |
| IFNLR1    | 0.036  | 0.0416  | 0.3515 | 0.73278 | 0.827 | -6.51 | 1.32527 | none |
| 11-Mar    | -0.044 | -0.0164 | -0.351 | 0.73283 | 0.827 | -6.51 | 2.07092 | none |
| SLC8A3    | -0.023 | -0.0192 | -0.351 | 0.7329  | 0.827 | -6.51 | 1.7151  | none |
| TCF3      | 0.066  | 0.1762  | 0.351  | 0.73309 | 0.827 | -6.51 | 0.36234 | none |
| LCK       | -0.032 | -0.0423 | -0.351 | 0.73326 | 0.827 | -6.51 | -0.7312 | none |
| VGF       | -0.025 | -0.0236 | -0.351 | 0.73327 | 0.827 | -6.51 | 1.64073 | none |
| PELI3     | 0.038  | 0.0883  | 0.3507 | 0.73337 | 0.827 | -6.51 | -0.1892 | none |
| MRPS16    | -0.062 | -0.145  | -0.35  | 0.73378 | 0.828 | -6.51 | 0.50907 | none |
| PEX19     | -0.036 | -0.108  | -0.35  | 0.73396 | 0.828 | -6.51 | 1.3372  | none |
| ASB12     | 0.025  | 0.0278  | 0.3496 | 0.73416 | 0.828 | -6.51 | 1.4074  | none |
| ABCB10    | 0.054  | 0.0285  | 0.3495 | 0.73421 | 0.828 | -6.51 | 0.80037 | none |
| ARV1      | 0.063  | -0.0123 | 0.349  | 0.73461 | 0.828 | -6.51 | -0.0584 | none |
| NTN5      | -0.034 | -0.0099 | -0.349 | 0.73462 | 0.828 | -6.51 | -0.1257 | none |
| MIIP      | -0.047 | -0.0861 | -0.349 | 0.73474 | 0.829 | -6.51 | 1.42854 | none |
| NDUFAF5   | -0.048 | -0.0998 | -0.349 | 0.73481 | 0.829 | -6.51 | 0.28252 | none |
| VLDLR     | 0.052  | 0.06    | 0.3484 | 0.73499 | 0.829 | -6.51 | 0.865   | none |
| OR1A2     | -0.026 | -0.0052 | -0.348 | 0.735   | 0.829 | -6.51 | 0.56424 | none |
| AL136097. | 0.025  | 0.0215  | 0.3483 | 0.73508 | 0.829 | -6.51 | 0.59664 | none |
| DTNBP1    | 0.038  | 0.1369  | 0.3483 | 0.73508 | 0.829 | -6.51 | 0.9312  | none |
| PTTG2     | 0.049  | 0.1152  | 0.3483 | 0.73509 | 0.829 | -6.51 | 0.49138 | none |
| TMCO5A    | -0.049 | -0.0491 | -0.348 | 0.73515 | 0.829 | -6.51 | 1.06393 | none |
| NRAS      | -0.06  | -0.0935 | -0.348 | 0.7352  | 0.829 | -6.51 | 0.83143 | none |
| SSUH2     | -0.079 | 0.0172  | -0.348 | 0.73521 | 0.829 | -6.51 | 1.46968 | none |
| GOLGA6L2  | 0.025  | 0.0255  | 0.3481 | 0.73522 | 0.829 | -6.51 | 1.55248 | none |
| MEPE      | -0.025 | -0.0251 | -0.348 | 0.73531 | 0.829 | -6.51 | 0.6513  | none |
| TCTN3     | -0.049 | -0.0522 | -0.348 | 0.73534 | 0.829 | -6.51 | 1.44634 | none |
| NBN       | 0.088  | 0.1834  | 0.3474 | 0.73577 | 0.829 | -6.51 | 0.462   | none |

|           |        |         |        |         |       |       |         |      |
|-----------|--------|---------|--------|---------|-------|-------|---------|------|
| MOCS1     | -0.063 | -0.067  | -0.347 | 0.73582 | 0.829 | -6.51 | 0.11399 | none |
| NT5DC4    | -0.068 | 0.0515  | -0.347 | 0.73588 | 0.829 | -6.51 | 0.55452 | none |
| BET1      | -0.048 | -0.1472 | -0.347 | 0.73592 | 0.829 | -6.51 | 0.85461 | none |
| KRT26     | 0.029  | 0.0289  | 0.347  | 0.736   | 0.829 | -6.51 | -0.1048 | none |
| WNT9A     | 0.028  | 0.0521  | 0.3469 | 0.73607 | 0.829 | -6.51 | -0.0055 | none |
| IL36A     | -0.04  | -0.0251 | -0.347 | 0.73627 | 0.829 | -6.51 | 1.60509 | none |
| MCM6      | -0.05  | 0.0366  | -0.347 | 0.73632 | 0.829 | -6.51 | 0.95408 | none |
| IL36G     | 0.027  | 0.0352  | 0.3466 | 0.73633 | 0.829 | -6.51 | 0.27196 | none |
| MLNR      | 0.026  | 0.0332  | 0.3462 | 0.73663 | 0.829 | -6.51 | -0.6913 | none |
| CTNBL1    | 0.041  | 0.0971  | 0.3462 | 0.73665 | 0.829 | -6.51 | 0.46377 | none |
| ARL15     | -0.032 | -0.1446 | -0.346 | 0.73681 | 0.829 | -6.51 | 0.51448 | none |
| HDAC8     | 0.04   | 0.018   | 0.3459 | 0.73685 | 0.829 | -6.51 | 0.36066 | none |
| CDKL3     | -0.14  | -0.1407 | -0.346 | 0.73685 | 0.829 | -6.51 | 0.85614 | none |
| SERPINB2  | 0.03   | 0.0404  | 0.3455 | 0.73709 | 0.83  | -6.51 | 0.42446 | none |
| FAM110B   | 0.066  | 0.0789  | 0.3453 | 0.73729 | 0.83  | -6.51 | -0.5462 | none |
| TIPRL     | 0.046  | -0.0585 | 0.344  | 0.7382  | 0.831 | -6.51 | -0.2288 | none |
| IGFALS    | 0.061  | 0.0288  | 0.344  | 0.73821 | 0.831 | -6.51 | 1.41899 | none |
| DBF4      | 0.086  | 0.1643  | 0.3439 | 0.73826 | 0.831 | -6.51 | 0.38225 | none |
| HIST1H2BI | 0.073  | 0.041   | 0.3434 | 0.73864 | 0.831 | -6.51 | -0.1677 | none |
| DENND1C   | 0.079  | 0.1785  | 0.3433 | 0.73872 | 0.831 | -6.51 | 0.30214 | none |
| CALM3     | -0.028 | 0.001   | -0.343 | 0.73875 | 0.831 | -6.51 | -0.1459 | none |
| CERK      | -0.031 | -0.0285 | -0.343 | 0.73877 | 0.831 | -6.51 | -0.4474 | none |
| NEURL2    | -0.04  | -0.0658 | -0.343 | 0.73882 | 0.831 | -6.51 | 1.76428 | none |
| LPP       | 0.047  | 0.1267  | 0.3431 | 0.73885 | 0.831 | -6.51 | -0.1524 | none |
| HOXA9     | -0.026 | -0.022  | -0.343 | 0.73894 | 0.831 | -6.51 | 1.59515 | none |
| DPM3      | -0.076 | -0.1657 | -0.343 | 0.73896 | 0.831 | -6.51 | -0.2811 | none |
| RCBTB2    | 0.056  | -0.0453 | 0.343  | 0.73897 | 0.831 | -6.51 | -0.4444 | none |
| NUP62CL   | 0.057  | 0.0818  | 0.3429 | 0.73903 | 0.831 | -6.51 | 0.5339  | none |
| CDK2AP2   | -0.039 | -0.0305 | -0.343 | 0.73909 | 0.831 | -6.51 | 1.38838 | none |
| COMMD1    | -0.054 | -0.1318 | -0.343 | 0.73921 | 0.831 | -6.51 | 0.33558 | none |
| OSGEPL1   | -0.053 | -0.1275 | -0.342 | 0.73947 | 0.831 | -6.51 | 0.30057 | none |
| RUNDC3B   | 0.074  | 0.0172  | 0.3421 | 0.73958 | 0.831 | -6.51 | 0.65126 | none |
| CORT      | 0.034  | 0.039   | 0.3419 | 0.73973 | 0.832 | -6.51 | -0.1174 | none |
| E2F3      | 0.051  | 0.0815  | 0.3419 | 0.73975 | 0.832 | -6.51 | 0.96065 | none |
| REXO1     | -0.076 | 0.0946  | -0.342 | 0.7398  | 0.832 | -6.51 | 0.11158 | none |
| NT5C1B-RI | 0.025  | 0.0197  | 0.3416 | 0.74    | 0.832 | -6.51 | 0.77608 | none |
| CACNA2D   | -0.04  | -0.0604 | -0.341 | 0.74004 | 0.832 | -6.51 | 0.73895 | none |
| TAL1      | 0.032  | 0.0449  | 0.3414 | 0.74013 | 0.832 | -6.51 | 0.57633 | none |
| SCG3      | -0.025 | -0.0179 | -0.341 | 0.74019 | 0.832 | -6.51 | 1.3149  | none |
| ERLIN2    | 0.049  | -0.0484 | 0.3413 | 0.74021 | 0.832 | -6.51 | -0.6924 | none |

|          |        |         |        |         |       |       |         |      |
|----------|--------|---------|--------|---------|-------|-------|---------|------|
| KDM4D    | 0.03   | 0.0739  | 0.3412 | 0.74028 | 0.832 | -6.51 | 0.87949 | none |
| ISG15    | -0.062 | -0.1326 | -0.341 | 0.7406  | 0.832 | -6.51 | 0.03594 | none |
| GPR179   | 0.041  | 0.0325  | 0.3407 | 0.74064 | 0.832 | -6.51 | 0.51427 | none |
| ZNF112   | 0.023  | 0.0228  | 0.3404 | 0.74084 | 0.832 | -6.51 | 0       | none |
| ZNF729   | 0.024  | 0.024   | 0.3402 | 0.74098 | 0.832 | -6.51 | -0.4115 | none |
| MPI      | 0.029  | 0.0805  | 0.3402 | 0.74102 | 0.832 | -6.51 | 0.51297 | none |
| SMIM8    | 0.049  | -0.0653 | 0.3401 | 0.74104 | 0.832 | -6.51 | -0.1997 | none |
| EGR1     | 0.066  | 0.1664  | 0.3399 | 0.7412  | 0.832 | -6.51 | -0.2132 | none |
| RTP4     | -0.044 | -0.0847 | -0.34  | 0.74123 | 0.832 | -6.51 | 1.55055 | none |
| PQBP1    | 0.025  | -0.0095 | 0.3398 | 0.74132 | 0.832 | -6.51 | 0.35226 | none |
| FIBP     | -0.038 | -0.0731 | -0.339 | 0.74183 | 0.833 | -6.51 | 0.09623 | none |
| HRC      | -0.071 | -0.1021 | -0.339 | 0.74196 | 0.833 | -6.51 | 1.71979 | none |
| PRSS51   | 0.026  | 0.0396  | 0.3384 | 0.74229 | 0.833 | -6.51 | -0.0453 | none |
| LAMA3    | -0.045 | -0.0288 | -0.338 | 0.74233 | 0.833 | -6.51 | 0.6074  | none |
| COPS3    | -0.043 | -0.0955 | -0.338 | 0.74262 | 0.834 | -6.51 | 1.04116 | none |
| RALGAPA1 | 0.1    | 0.1255  | 0.3375 | 0.74294 | 0.834 | -6.51 | 0.98021 | none |
| ASF1A    | 0.042  | -0.0691 | 0.3373 | 0.7431  | 0.834 | -6.51 | -0.4223 | none |
| PCDHGB1  | -0.025 | -0.0104 | -0.337 | 0.74327 | 0.834 | -6.51 | 0       | none |
| RNF26    | -0.037 | -0.0387 | -0.337 | 0.74353 | 0.834 | -6.51 | 1.18903 | none |
| SOAT2    | 0.059  | 0.0591  | 0.3366 | 0.74361 | 0.834 | -6.51 | 0.42499 | none |
| CEBPA    | 0.029  | 0.0724  | 0.3366 | 0.74365 | 0.834 | -6.51 | 0.72083 | none |
| SLC43A1  | -0.037 | -0.0181 | -0.336 | 0.7437  | 0.834 | -6.51 | 1.06428 | none |
| SH2D4B   | 0.023  | 0.0292  | 0.3364 | 0.74375 | 0.834 | -6.51 | 0.55562 | none |
| MYBPC1   | -0.026 | -0.0257 | -0.336 | 0.74379 | 0.834 | -6.51 | -0.6861 | none |
| PNPLA2   | -0.043 | -0.0668 | -0.336 | 0.7438  | 0.834 | -6.51 | 0.66398 | none |
| CAPN5    | 0.039  | 0.0068  | 0.3363 | 0.74384 | 0.834 | -6.51 | 0.6104  | none |
| TOMM40L  | -0.038 | 0.0194  | -0.336 | 0.74413 | 0.835 | -6.51 | 0.5596  | none |
| FAM181B  | -0.023 | -0.0064 | -0.336 | 0.7442  | 0.835 | -6.51 | 0.01408 | none |
| PRUNE1   | 0.049  | -0.0237 | 0.3358 | 0.74422 | 0.835 | -6.51 | 0.50934 | none |
| SEC22A   | 0.068  | -0.0499 | 0.3356 | 0.74435 | 0.835 | -6.51 | 0.72197 | none |
| MCM3     | 0.064  | 0.1753  | 0.3352 | 0.74462 | 0.835 | -6.51 | 0.39529 | none |
| PMM1     | 0.046  | 0.0139  | 0.3348 | 0.74496 | 0.835 | -6.51 | 0.08675 | none |
| APOBEC3C | 0.037  | -0.039  | 0.3347 | 0.74498 | 0.835 | -6.51 | 0.46805 | none |
| EXOSC1   | -0.054 | -0.1312 | -0.335 | 0.74508 | 0.835 | -6.51 | 0.72899 | none |
| PPP4R4   | 0.03   | 0.0796  | 0.3342 | 0.74538 | 0.836 | -6.51 | 0.25507 | none |
| ARHGEF16 | 0.029  | 0.0502  | 0.3342 | 0.7454  | 0.836 | -6.51 | -0.1313 | none |
| APBB1IP  | 0.08   | 0.1529  | 0.3341 | 0.74544 | 0.836 | -6.51 | 0.40232 | none |
| INHA     | 0.047  | 0.0477  | 0.3339 | 0.74561 | 0.836 | -6.51 | 1.69179 | none |
| ARHGAP36 | -0.033 | -0.0128 | -0.334 | 0.74564 | 0.836 | -6.51 | -0.7905 | none |
| FAM214A  | 0.081  | 0.2337  | 0.3337 | 0.74573 | 0.836 | -6.51 | 0.76387 | none |

|          |        |         |        |         |       |       |         |      |
|----------|--------|---------|--------|---------|-------|-------|---------|------|
| DEPDC1   | -0.054 | -0.0177 | -0.334 | 0.74577 | 0.836 | -6.51 | 1.407   | none |
| C1ORF105 | 0.076  | 0.0772  | 0.3336 | 0.7458  | 0.836 | -6.51 | 0.78806 | none |
| FAAH2    | 0.051  | 0.0246  | 0.3336 | 0.74583 | 0.836 | -6.51 | -0.0548 | none |
| TMEM189  | 0.041  | 0.0556  | 0.3334 | 0.74593 | 0.836 | -6.51 | 0.76539 | none |
| ZBTB32   | 0.033  | 0.1354  | 0.3334 | 0.74596 | 0.836 | -6.51 | 0.99595 | none |
| CNTN4    | -0.035 | -0.0588 | -0.333 | 0.74599 | 0.836 | -6.51 | -0.3238 | none |
| ARHGAP15 | 0.053  | 0.1131  | 0.3333 | 0.74602 | 0.836 | -6.51 | 0.88377 | none |
| APOL4    | 0.072  | 0.1304  | 0.3332 | 0.74608 | 0.836 | -6.51 | 0.71645 | none |
| COPG2    | 0.045  | 0.057   | 0.3332 | 0.74609 | 0.836 | -6.51 | 0.34377 | none |
| CHRNA4   | -0.152 | -0.1088 | -0.333 | 0.74634 | 0.836 | -6.51 | 1.19438 | none |
| LRRRC74A | -0.049 | -0.0487 | -0.333 | 0.74639 | 0.836 | -6.51 | 0.62735 | none |
| CD72     | 0.031  | 0.0885  | 0.3326 | 0.74652 | 0.836 | -6.51 | -0.1097 | none |
| HERC3    | -0.041 | -0.0824 | -0.332 | 0.74672 | 0.836 | -6.51 | 0.08481 | none |
| ZCRB1    | 0.027  | -0.0191 | 0.3323 | 0.74674 | 0.836 | -6.51 | -0.1015 | none |
| CD247    | -0.026 | -0.0387 | -0.332 | 0.74679 | 0.836 | -6.51 | 1.14536 | none |
| TRIM28   | -0.053 | 0.0769  | -0.332 | 0.74681 | 0.836 | -6.51 | -0.1258 | none |
| ABHD13   | 0.03   | -0.0373 | 0.3322 | 0.74684 | 0.836 | -6.51 | 1.13243 | none |
| ZBTB12   | 0.026  | 0.0501  | 0.3321 | 0.7469  | 0.836 | -6.51 | -0.112  | none |
| SPINK4   | 0.038  | 0.0927  | 0.3321 | 0.74691 | 0.836 | -6.51 | -0.5131 | none |
| LARGE2   | -0.045 | -0.0432 | -0.332 | 0.74729 | 0.836 | -6.51 | 1.5111  | none |
| PLXND1   | 0.046  | 0.0562  | 0.3316 | 0.7473  | 0.836 | -6.51 | 0.18841 | none |
| HHEX     | 0.028  | 0.011   | 0.3315 | 0.74734 | 0.836 | -6.51 | 0.84248 | none |
| KCNQ3    | -0.036 | -0.0472 | -0.331 | 0.74738 | 0.836 | -6.51 | -0.2263 | none |
| TCEAL3   | 0.06   | 0.0805  | 0.3312 | 0.74756 | 0.836 | -6.51 | 0.0505  | none |
| FAM174B  | -0.075 | -0.1035 | -0.331 | 0.74757 | 0.836 | -6.51 | -0.2247 | none |
| RAG2     | -0.028 | -0.0184 | -0.331 | 0.7477  | 0.836 | -6.51 | 1.38788 | none |
| ARHGAP15 | 0.064  | 0.032   | 0.331  | 0.74774 | 0.836 | -6.51 | 0.32897 | none |
| ENPP7    | -0.023 | -0.0121 | -0.331 | 0.74782 | 0.837 | -6.51 | 0.50826 | none |
| CMSS1    | 0.034  | 0.0092  | 0.3307 | 0.74797 | 0.837 | -6.51 | 0.09048 | none |
| THEMIS   | -0.049 | -0.0574 | -0.331 | 0.748   | 0.837 | -6.51 | 0.755   | none |
| HGH1     | -0.036 | 0.0499  | -0.33  | 0.74809 | 0.837 | -6.51 | 0.08832 | none |
| C17ORF80 | -0.085 | -0.0048 | -0.33  | 0.74829 | 0.837 | -6.51 | 1.44645 | none |
| PET100   | 0.075  | -0.0397 | 0.3301 | 0.74837 | 0.837 | -6.51 | -0.1223 | none |
| RANGAP1  | 0.052  | 0.1597  | 0.3301 | 0.74837 | 0.837 | -6.51 | 0.35669 | none |
| SCX      | -0.029 | -0.002  | -0.33  | 0.74839 | 0.837 | -6.51 | 0.8632  | none |
| SUPT3H   | 0.056  | 0.0287  | 0.3297 | 0.74866 | 0.837 | -6.51 | 0.07139 | none |
| NTNG1    | -0.034 | -0.0213 | -0.329 | 0.74883 | 0.837 | -6.51 | -0.1736 | none |
| PSMB9    | -0.038 | -0.0452 | -0.329 | 0.74892 | 0.837 | -6.51 | 1.35844 | none |
| FXR1     | 0.048  | 0.0693  | 0.3293 | 0.74894 | 0.837 | -6.51 | 0.91136 | none |
| TEKT5    | -0.03  | -0.0301 | -0.329 | 0.74914 | 0.837 | -6.51 | -0.2942 | none |

|           |        |         |        |         |       |       |         |      |
|-----------|--------|---------|--------|---------|-------|-------|---------|------|
| CGGBP1    | -0.033 | -0.0977 | -0.329 | 0.7492  | 0.837 | -6.51 | 0.04139 | none |
| TMPPE     | 0.034  | -0.0062 | 0.3282 | 0.74974 | 0.838 | -6.52 | 0.41857 | none |
| RAD21     | 0.051  | 0.1086  | 0.328  | 0.74988 | 0.838 | -6.52 | 0.90759 | none |
| SPRR2D    | -0.035 | -0.0349 | -0.328 | 0.75004 | 0.838 | -6.52 | 1.15163 | none |
| DNMT3B    | 0.029  | 0.0541  | 0.3278 | 0.75004 | 0.838 | -6.52 | 0.16419 | none |
| CRHR2     | 0.033  | 0.0371  | 0.3278 | 0.75004 | 0.838 | -6.52 | 1.08514 | none |
| ANG       | -0.065 | -0.0279 | -0.328 | 0.75014 | 0.838 | -6.52 | 1.44853 | none |
| C1GALT1C  | -0.024 | -0.0285 | -0.327 | 0.75041 | 0.838 | -6.52 | 1.35295 | none |
| SLC25A24  | 0.029  | -0.0562 | 0.327  | 0.75063 | 0.839 | -6.52 | 0.26458 | none |
| GABRA5    | -0.05  | -0.0435 | -0.326 | 0.75104 | 0.839 | -6.52 | 0.02529 | none |
| 7-Sep     | -0.044 | 0.0081  | -0.326 | 0.75116 | 0.839 | -6.52 | 1.29211 | none |
| KIT       | -0.058 | -0.1046 | -0.326 | 0.75141 | 0.839 | -6.52 | 1.08159 | none |
| EEF2      | -0.055 | 0.0027  | -0.326 | 0.75144 | 0.839 | -6.52 | 1.41619 | none |
| CFAP99    | -0.03  | -0.0076 | -0.326 | 0.75171 | 0.839 | -6.52 | 1.2245  | none |
| TSPYL5    | 0.027  | 0.0358  | 0.3251 | 0.75203 | 0.84  | -6.52 | 1.15314 | none |
| ZBTB5     | 0.035  | 0.0506  | 0.3248 | 0.75229 | 0.84  | -6.52 | 0.9879  | none |
| AQP12A    | 0.028  | 0.0536  | 0.3245 | 0.75244 | 0.84  | -6.52 | -0.0381 | none |
| TM9SF1    | -0.034 | -0.0658 | -0.325 | 0.75248 | 0.84  | -6.52 | 0.80049 | none |
| EIF3CL    | 0.091  | 0.0367  | 0.3245 | 0.7525  | 0.84  | -6.52 | 0.33482 | none |
| OMG       | -0.041 | -0.0292 | -0.324 | 0.75253 | 0.84  | -6.52 | 0.0455  | none |
| ADORA2A   | -0.031 | 0.0183  | -0.324 | 0.75256 | 0.84  | -6.52 | 1.36964 | none |
| MCHR1     | -0.025 | -0.0269 | -0.324 | 0.75258 | 0.84  | -6.52 | 0.37772 | none |
| PTGES3L-A | 0.052  | 0.0449  | 0.3244 | 0.75258 | 0.84  | -6.52 | 1.2566  | none |
| NARS2     | 0.058  | 0.0699  | 0.3244 | 0.75258 | 0.84  | -6.52 | 0.681   | none |
| ADM5      | 0.037  | 0.096   | 0.3242 | 0.75273 | 0.84  | -6.52 | 0.55824 | none |
| JAG1      | -0.048 | -0.0137 | -0.324 | 0.75281 | 0.84  | -6.52 | 0.73329 | none |
| NIPA2     | -0.066 | -0.102  | -0.324 | 0.75286 | 0.84  | -6.52 | 1.81819 | none |
| RSU1      | 0.025  | -0.0498 | 0.3239 | 0.75292 | 0.84  | -6.52 | 0.52099 | none |
| CPEB2     | -0.032 | -0.0039 | -0.324 | 0.75306 | 0.84  | -6.52 | 1.48779 | none |
| AFP       | -0.073 | -0.1679 | -0.323 | 0.75354 | 0.841 | -6.52 | 0.3842  | none |
| LPAR5     | 0.036  | 0.0563  | 0.3229 | 0.75366 | 0.841 | -6.52 | 0.27685 | none |
| COL6A1    | -0.064 | -0.0283 | -0.323 | 0.75382 | 0.841 | -6.52 | 0.84741 | none |
| MTERF4    | 0.043  | 0.0018  | 0.3227 | 0.75383 | 0.841 | -6.52 | -0.6166 | none |
| CRHR1     | -0.032 | -0.0175 | -0.323 | 0.75386 | 0.841 | -6.52 | -0.3671 | none |
| ZNF655    | -0.035 | -0.0732 | -0.323 | 0.75394 | 0.841 | -6.52 | 0.758   | none |
| RFXANK    | -0.055 | -0.0692 | -0.322 | 0.75399 | 0.841 | -6.52 | 0.0484  | none |
| SPHK1     | 0.069  | 0.0656  | 0.3219 | 0.75441 | 0.841 | -6.52 | -0.5072 | none |
| SIX2      | 0.027  | 0.0257  | 0.3218 | 0.75448 | 0.841 | -6.52 | 0.72848 | none |
| EBF3      | -0.025 | #####   | -0.322 | 0.75465 | 0.841 | -6.52 | 0.40389 | none |
| CBLL1     | 0.037  | 0.052   | 0.3215 | 0.75466 | 0.841 | -6.52 | -0.637  | none |

|           |        |         |        |         |       |       |         |      |
|-----------|--------|---------|--------|---------|-------|-------|---------|------|
| HMG5      | 0.091  | 0.2022  | 0.3202 | 0.75562 | 0.842 | -6.52 | 0.32596 | none |
| C3ORF18   | 0.038  | 0.0504  | 0.3199 | 0.75585 | 0.842 | -6.52 | 0.20858 | none |
| SSTR5     | -0.025 | -0.0248 | -0.32  | 0.75587 | 0.842 | -6.52 | -0.5284 | none |
| TNFRSF6B  | 0.022  | 0.0036  | 0.3198 | 0.75594 | 0.842 | -6.52 | -0.3315 | none |
| PRIM1     | 0.048  | 0.0074  | 0.3197 | 0.75598 | 0.842 | -6.52 | 1.09572 | none |
| ROPN1     | 0.044  | 0.047   | 0.3188 | 0.75668 | 0.843 | -6.52 | 0.08592 | none |
| TP53I11   | -0.046 | 0.0163  | -0.318 | 0.75703 | 0.844 | -6.52 | 0.21169 | none |
| ITGB5     | -0.045 | -0.0572 | -0.318 | 0.75712 | 0.844 | -6.52 | 0.50309 | none |
| KCNK17    | 0.023  | 0.0285  | 0.3181 | 0.75716 | 0.844 | -6.52 | 0.34895 | none |
| ZP4       | -0.023 | -0.024  | -0.318 | 0.75725 | 0.844 | -6.52 | 0       | none |
| SOAT1     | 0.044  | -0.0876 | 0.3179 | 0.75732 | 0.844 | -6.52 | 0.93231 | none |
| FASLG     | -0.05  | -0.0099 | -0.318 | 0.75737 | 0.844 | -6.52 | 0.74236 | none |
| SYNJ2BP-C | -1.459 | -1.3811 | -0.318 | 0.75739 | 0.844 | -6.52 | 1.99825 | none |
| AQP12B    | 0.027  | 0.0353  | 0.3178 | 0.75743 | 0.844 | -6.52 | -0.3428 | none |
| TPRX1     | 0.023  | 0.0225  | 0.3176 | 0.75753 | 0.844 | -6.52 | 0.94361 | none |
| CCDC184   | -0.023 | -0.0207 | -0.318 | 0.7576  | 0.844 | -6.52 | 0       | none |
| FBLN1     | -0.055 | 0.0426  | -0.317 | 0.75773 | 0.844 | -6.52 | 0.45772 | none |
| SDHD      | 0.045  | -0.0895 | 0.3173 | 0.75778 | 0.844 | -6.52 | 0.38657 | none |
| GIMAP8    | 0.044  | 0.0917  | 0.3172 | 0.75784 | 0.844 | -6.52 | 0.14996 | none |
| TMED7-TIC | -0.041 | #####   | -0.317 | 0.75786 | 0.844 | -6.52 | 1.25722 | none |
| ZKSCAN8   | -0.036 | -0.0228 | -0.317 | 0.75801 | 0.844 | -6.52 | 0.54795 | none |
| ISY1-RAB4 | 0.027  | 0.0187  | 0.3166 | 0.75832 | 0.844 | -6.52 | 0.77651 | none |
| MAP3K3    | -0.065 | 0.0312  | -0.316 | 0.75851 | 0.844 | -6.52 | 0.56759 | none |
| PTH2R     | 0.1    | 0.0497  | 0.3161 | 0.75865 | 0.844 | -6.52 | -0.5654 | none |
| CRYGN     | 0.022  | 0.0159  | 0.3159 | 0.75883 | 0.845 | -6.52 | 1.58362 | none |
| ZDHHC9    | -0.033 | -0.085  | -0.316 | 0.75895 | 0.845 | -6.52 | 0.91796 | none |
| MTRNR2L1  | -0.027 | -0.0649 | -0.316 | 0.75906 | 0.845 | -6.52 | 0.89478 | none |
| HIF1AN    | 0.032  | -0.0013 | 0.3155 | 0.7591  | 0.845 | -6.52 | -0.6392 | none |
| PPP2R5E   | 0.045  | 0.1     | 0.3145 | 0.75981 | 0.845 | -6.52 | 0.94328 | none |
| NCLN      | 0.036  | 0.0756  | 0.3144 | 0.75989 | 0.845 | -6.52 | 1.4587  | none |
| DPP7      | -0.035 | -0.0336 | -0.314 | 0.75992 | 0.845 | -6.52 | 0.84152 | none |
| CASP1     | -0.024 | -0.0707 | -0.314 | 0.76004 | 0.845 | -6.52 | -0.1903 | none |
| DIRAS1    | 0.024  | 0.0134  | 0.3142 | 0.76009 | 0.845 | -6.52 | 1.5413  | none |
| DUSP7     | 0.037  | 0.074   | 0.3139 | 0.76026 | 0.846 | -6.52 | -0.1772 | none |
| BARHL1    | 0.029  | 0.0148  | 0.3137 | 0.76042 | 0.846 | -6.52 | 0.13123 | none |
| CPNE7     | -0.056 | 0.0877  | -0.314 | 0.76055 | 0.846 | -6.52 | 0.79014 | none |
| RCN1      | -0.041 | 0.0032  | -0.313 | 0.76067 | 0.846 | -6.52 | 1.44066 | none |
| COPRS     | -0.069 | -0.1339 | -0.313 | 0.7608  | 0.846 | -6.52 | 0.5892  | none |
| NAALADL2  | -0.042 | -0.0532 | -0.312 | 0.76148 | 0.847 | -6.52 | 1.16088 | none |
| SPAG16    | -0.035 | -0.1411 | -0.312 | 0.76157 | 0.847 | -6.52 | 0.29378 | none |

|          |        |         |        |         |       |       |         |      |
|----------|--------|---------|--------|---------|-------|-------|---------|------|
| CTSD     | -0.031 | -0.0286 | -0.312 | 0.76172 | 0.847 | -6.52 | 1.60635 | none |
| AXDND1   | -0.023 | 0.0061  | -0.312 | 0.76173 | 0.847 | -6.52 | 0.26367 | none |
| DIP2C    | -0.042 | #####   | -0.312 | 0.76192 | 0.847 | -6.52 | 0.96294 | none |
| VAPB     | -0.034 | 0.0194  | -0.312 | 0.76193 | 0.847 | -6.52 | 1.18201 | none |
| ASPHD1   | 0.041  | 0.0539  | 0.3116 | 0.76199 | 0.847 | -6.52 | 1.4184  | none |
| HMCN1    | -0.021 | -0.0153 | -0.311 | 0.76213 | 0.847 | -6.52 | 0       | none |
| KDEL3    | -0.054 | -0.0428 | -0.311 | 0.7623  | 0.847 | -6.52 | 1.29627 | none |
| OTUB1    | -0.037 | -0.0815 | -0.311 | 0.76236 | 0.847 | -6.52 | 0.90309 | none |
| BLK      | -0.053 | -0.118  | -0.311 | 0.76245 | 0.847 | -6.52 | 0.21388 | none |
| BYSL     | 0.032  | 0.051   | 0.3108 | 0.76252 | 0.847 | -6.52 | 0.11234 | none |
| GCOM1    | -0.026 | 0.0099  | -0.311 | 0.76257 | 0.847 | -6.52 | 1.10823 | none |
| NPHP4    | 0.061  | 0.14    | 0.3102 | 0.76299 | 0.848 | -6.52 | 1.50878 | none |
| HSPA14   | -0.026 | -0.0705 | -0.31  | 0.76325 | 0.848 | -6.52 | 0.882   | none |
| HIST1H4L | -0.069 | -0.0928 | -0.309 | 0.76353 | 0.848 | -6.52 | 1.07801 | none |
| EIF3J    | 0.053  | 0.0901  | 0.3094 | 0.76361 | 0.848 | -6.52 | 1.23043 | none |
| SPP1     | 0.065  | 0.0811  | 0.3093 | 0.76364 | 0.848 | -6.52 | 0.01623 | none |
| HSDL2    | 0.029  | -0.0451 | 0.3093 | 0.76364 | 0.848 | -6.52 | 0.31208 | none |
| TMEM141  | 0.046  | 0.0034  | 0.3091 | 0.76379 | 0.848 | -6.52 | -0.3943 | none |
| MRPL42   | -0.044 | -0.087  | -0.309 | 0.76382 | 0.848 | -6.52 | -0.1875 | none |
| CLGN     | -0.026 | -0.0215 | -0.309 | 0.7639  | 0.848 | -6.52 | 1.03387 | none |
| TCP10L2  | 0.045  | 0.0887  | 0.309  | 0.76392 | 0.848 | -6.52 | -0.2044 | none |
| RGS16    | -0.026 | 0.0836  | -0.309 | 0.76395 | 0.848 | -6.52 | 0.42766 | none |
| RYR3     | -0.131 | 0.0602  | -0.309 | 0.76421 | 0.848 | -6.52 | -0.2515 | none |
| VSX2     | 0.023  | 0.0455  | 0.3082 | 0.76451 | 0.849 | -6.52 | 0.42171 | none |
| SLC25A53 | 0.064  | 0.0886  | 0.3079 | 0.76469 | 0.849 | -6.52 | 1.09431 | none |
| ALKBH1   | 0.053  | 0.0397  | 0.3078 | 0.76475 | 0.849 | -6.52 | 0.65508 | none |
| TMEM183  | -0.045 | -0.0815 | -0.308 | 0.76491 | 0.849 | -6.52 | 1.52718 | none |
| TMEM160  | -0.065 | -0.1178 | -0.307 | 0.7652  | 0.849 | -6.52 | 0.95845 | none |
| GIPC3    | -0.022 | -0.0027 | -0.307 | 0.76537 | 0.849 | -6.52 | 0.37463 | none |
| GOLGA6L1 | -0.028 | -0.0124 | -0.307 | 0.76541 | 0.849 | -6.52 | -0.224  | none |
| SPSB3    | -0.041 | -0.0421 | -0.307 | 0.76564 | 0.85  | -6.52 | 0.97475 | none |
| PRSS33   | 0.023  | 0.0231  | 0.3064 | 0.76583 | 0.85  | -6.52 | 1.49167 | none |
| DDR2     | 0.036  | 0.0358  | 0.3062 | 0.76594 | 0.85  | -6.52 | 0.51921 | none |
| CCDC110  | -0.026 | -0.018  | -0.306 | 0.76595 | 0.85  | -6.52 | 1.4035  | none |
| SEPHS2   | -0.025 | -0.0062 | -0.306 | 0.76597 | 0.85  | -6.52 | 1.29045 | none |
| PLEKHM2  | 0.043  | 0.1368  | 0.3061 | 0.76599 | 0.85  | -6.52 | 0.55834 | none |
| CACFD1   | 0.046  | -0.0046 | 0.306  | 0.76613 | 0.85  | -6.52 | 0.89024 | none |
| USP27X   | 0.027  | 0.0578  | 0.3059 | 0.76616 | 0.85  | -6.52 | 0.87022 | none |
| SLC25A1  | -0.031 | 0.0181  | -0.306 | 0.76628 | 0.85  | -6.52 | 0.85451 | none |
| HIST1H1C | -0.035 | -0.0819 | -0.306 | 0.76634 | 0.85  | -6.52 | 1.29914 | none |



|          |        |         |        |         |       |       |         |      |
|----------|--------|---------|--------|---------|-------|-------|---------|------|
| ADGRG5   | -0.038 | -0.066  | -0.306 | 0.76647 | 0.85  | -6.52 | 0.35485 | none |
| ANKRD22  | 0.031  | -0.0119 | 0.3054 | 0.76654 | 0.85  | -6.52 | 0.08772 | none |
| DHRS9    | 0.058  | -0.0122 | 0.3053 | 0.76664 | 0.85  | -6.52 | -0.2946 | none |
| TP53TG5  | -0.045 | -0.0033 | -0.305 | 0.76673 | 0.85  | -6.52 | 1.43444 | none |
| FGFR3    | 0.031  | 0.0756  | 0.3051 | 0.76676 | 0.85  | -6.52 | 0.76987 | none |
| RAB6A    | 0.028  | 0.018   | 0.3048 | 0.76697 | 0.85  | -6.52 | 0.45822 | none |
| HOXA5    | 0.035  | 0.0305  | 0.3046 | 0.7671  | 0.85  | -6.52 | 1.53266 | none |
| PEX14    | -0.044 | -0.0296 | -0.304 | 0.76733 | 0.85  | -6.52 | -0.0391 | none |
| HIST2H4B | 0.076  | 0.0515  | 0.3043 | 0.76735 | 0.85  | -6.52 | 0.70153 | none |
| FCGR2B   | -0.024 | -0.0435 | -0.304 | 0.7674  | 0.85  | -6.52 | 0.77085 | none |
| C9ORF72  | 0.047  | 0.0044  | 0.3041 | 0.76749 | 0.85  | -6.52 | 0.45013 | none |
| MAGEB3   | -0.022 | -0.0047 | -0.304 | 0.76752 | 0.85  | -6.52 | 0.86097 | none |
| CDV3     | 0.053  | 0.1002  | 0.304  | 0.76755 | 0.85  | -6.52 | -0.1094 | none |
| CFAP57   | -0.043 | 0.0102  | -0.304 | 0.76784 | 0.851 | -6.52 | 1.69394 | none |
| PDIA3    | 0.035  | 0.0994  | 0.3033 | 0.76807 | 0.851 | -6.52 | 0.8523  | none |
| PABPN1   | 0.048  | 0.1297  | 0.3032 | 0.76815 | 0.851 | -6.52 | 0.00625 | none |
| CUEDC1   | 0.082  | 0.0843  | 0.303  | 0.76829 | 0.851 | -6.52 | -0.2773 | none |
| HSP90B1  | 0.092  | 0.2386  | 0.3029 | 0.76837 | 0.851 | -6.52 | 0.67897 | none |
| PPM1A    | -0.021 | -0.0057 | -0.303 | 0.7684  | 0.851 | -6.52 | 0.91089 | none |
| PRKCQ    | 0.059  | 0.128   | 0.3027 | 0.76852 | 0.851 | -6.52 | 0.77544 | none |
| DUSP8    | 0.029  | 0.0402  | 0.3027 | 0.76857 | 0.851 | -6.52 | 1.45484 | none |
| LRRC32   | 0.029  | 0.068   | 0.3025 | 0.76866 | 0.851 | -6.52 | 0.083   | none |
| LZTS3    | -0.024 | -0.0206 | -0.302 | 0.76917 | 0.852 | -6.52 | 1.32728 | none |
| CHIC2    | 0.05   | -0.0267 | 0.3012 | 0.76963 | 0.852 | -6.52 | 1.66258 | none |
| CDC37L1  | 0.049  | -0.0377 | 0.3005 | 0.77015 | 0.853 | -6.52 | 0.22332 | none |
| KPNA3    | -0.04  | -0.003  | -0.3   | 0.77061 | 0.853 | -6.52 | 1.1713  | none |
| CCL23    | -0.024 | -0.0316 | -0.299 | 0.77097 | 0.853 | -6.52 | 0.96679 | none |
| ATP4B    | 0.022  | 0.0367  | 0.2994 | 0.77098 | 0.853 | -6.52 | -0.0267 | none |
| TWIST2   | 0.023  | 0.023   | 0.2987 | 0.77153 | 0.854 | -6.53 | 1.8788  | none |
| PRR5L    | 0.052  | 0.0871  | 0.2984 | 0.77173 | 0.854 | -6.53 | 0.88148 | none |
| PMFBP1   | 0.027  | 0.1081  | 0.2981 | 0.77198 | 0.854 | -6.53 | 0.41508 | none |
| CTAG1B   | -0.023 | -0.0268 | -0.298 | 0.77222 | 0.855 | -6.53 | 0       | none |
| GNMT     | -0.021 | -0.0047 | -0.298 | 0.77223 | 0.855 | -6.53 | 0.10379 | none |
| DEDD     | 0.025  | -0.0026 | 0.2975 | 0.7724  | 0.855 | -6.53 | -0.8823 | none |
| MGST3    | 0.049  | -0.0651 | 0.2973 | 0.77252 | 0.855 | -6.53 | 0.73309 | none |
| RAB27B   | -0.022 | -0.0285 | -0.297 | 0.77265 | 0.855 | -6.53 | 0       | none |
| ADH4     | 0.045  | -0.0161 | 0.2968 | 0.77288 | 0.855 | -6.53 | 0.04201 | none |
| CD19     | -0.033 | -0.0714 | -0.297 | 0.77292 | 0.855 | -6.53 | 1.08192 | none |
| POTEI    | 0.023  | 0.0093  | 0.2967 | 0.77299 | 0.855 | -6.53 | -0.0273 | none |
| FCGRT    | 0.048  | -0.113  | 0.2964 | 0.77319 | 0.855 | -6.53 | -0.2772 | none |

|          |        |         |        |         |       |       |         |      |
|----------|--------|---------|--------|---------|-------|-------|---------|------|
| LRRRC61  | -0.03  | #####   | -0.296 | 0.77338 | 0.855 | -6.53 | 1.65892 | none |
| CDS2     | -0.043 | -0.1462 | -0.296 | 0.77361 | 0.856 | -6.53 | 0.43072 | none |
| FADD     | -0.024 | -0.0357 | -0.296 | 0.77377 | 0.856 | -6.53 | 1.14447 | none |
| ECSIT    | -0.041 | -0.0574 | -0.296 | 0.77378 | 0.856 | -6.53 | 1.33981 | none |
| ICAM2    | -0.044 | -0.1186 | -0.296 | 0.77382 | 0.856 | -6.53 | -0.0276 | none |
| PTPRU    | 0.025  | 0.0231  | 0.2953 | 0.77399 | 0.856 | -6.53 | 0.58178 | none |
| NCK2     | 0.031  | 0.0787  | 0.2953 | 0.774   | 0.856 | -6.53 | 1.07839 | none |
| NOP9     | -0.03  | 0.0565  | -0.295 | 0.77407 | 0.856 | -6.53 | 0.10383 | none |
| GPR152   | 0.022  | 0.0148  | 0.2952 | 0.77408 | 0.856 | -6.53 | 0.66047 | none |
| C1QTNF9  | 0.021  | 0.0241  | 0.2952 | 0.7741  | 0.856 | -6.53 | 0       | none |
| UBE2E2   | -0.045 | 0.023   | -0.295 | 0.77423 | 0.856 | -6.53 | 0.06562 | none |
| EFNA3    | -0.029 | 0.0257  | -0.295 | 0.77436 | 0.856 | -6.53 | 0.34174 | none |
| NTNG2    | 0.041  | 0.0885  | 0.2948 | 0.77438 | 0.856 | -6.53 | 0.58478 | none |
| AGBL3    | 0.049  | -0.0352 | 0.2948 | 0.77439 | 0.856 | -6.53 | -0.8944 | none |
| COMTD1   | 0.04   | 0.0137  | 0.2946 | 0.77451 | 0.856 | -6.53 | 1.51451 | none |
| LHFPL1   | 0.03   | -0.0118 | 0.2945 | 0.77463 | 0.856 | -6.53 | 1.59192 | none |
| TIGD3    | -0.03  | -0.0295 | -0.294 | 0.77468 | 0.856 | -6.53 | 0.06198 | none |
| C1QB     | 0.046  | 0.0538  | 0.2944 | 0.77472 | 0.856 | -6.53 | 1.4126  | none |
| ANKRD20A | 0.028  | 0.0258  | 0.2939 | 0.77508 | 0.856 | -6.53 | 1.76792 | none |
| CCDC155  | 0.103  | 0.1656  | 0.2937 | 0.7752  | 0.856 | -6.53 | -0.1422 | none |
| SERPINB8 | -0.054 | -0.0335 | -0.294 | 0.7753  | 0.856 | -6.53 | 0.63551 | none |
| MRGPRF   | -0.041 | #####   | -0.294 | 0.7753  | 0.856 | -6.53 | 1.38705 | none |
| COL5A2   | -0.027 | 0.0114  | -0.294 | 0.77531 | 0.856 | -6.53 | 0.31063 | none |
| CLEC1A   | -0.116 | -0.1554 | -0.293 | 0.77565 | 0.856 | -6.53 | -0.1267 | none |
| YDJC     | -0.035 | -0.0232 | -0.293 | 0.77565 | 0.856 | -6.53 | 1.79539 | none |
| PRSS36   | -0.032 | -0.0418 | -0.293 | 0.77594 | 0.857 | -6.53 | 1.63387 | none |
| C12ORF75 | -0.048 | -0.1201 | -0.293 | 0.77595 | 0.857 | -6.53 | 1.27229 | none |
| PCDHGB2  | -0.022 | -0.023  | -0.292 | 0.77616 | 0.857 | -6.53 | 1.69853 | none |
| DMAP1    | 0.03   | 0.1393  | 0.2923 | 0.77624 | 0.857 | -6.53 | 0.58679 | none |
| SEC62    | 0.06   | 0.055   | 0.2923 | 0.77626 | 0.857 | -6.53 | 0.01659 | none |
| ZNF649   | 0.087  | 0.061   | 0.2922 | 0.77635 | 0.857 | -6.53 | 0.88164 | none |
| KREMEN2  | -0.022 | -0.0094 | -0.292 | 0.77645 | 0.857 | -6.53 | 0.43065 | none |
| CTNND1   | 0.038  | 0.0877  | 0.2919 | 0.77656 | 0.857 | -6.53 | 0.31498 | none |
| EMD      | -0.05  | -0.1477 | -0.292 | 0.77675 | 0.857 | -6.53 | 1.21929 | none |
| ASL      | 0.024  | 0.0503  | 0.2909 | 0.7773  | 0.858 | -6.53 | 0.73113 | none |
| CES1     | 0.054  | 0.0944  | 0.2906 | 0.77753 | 0.858 | -6.53 | 0.02019 | none |
| PRSS50   | 0.025  | 0.0104  | 0.2903 | 0.77772 | 0.858 | -6.53 | -0.2413 | none |
| CFB      | -0.032 | #####   | -0.29  | 0.77785 | 0.858 | -6.53 | 0.42002 | none |
| ORMDL1   | -0.037 | -0.051  | -0.29  | 0.77786 | 0.858 | -6.53 | 1.03495 | none |
| KCTD10   | -0.032 | -0.0459 | -0.29  | 0.77787 | 0.858 | -6.53 | 0.55546 | none |

|          |        |         |        |         |       |       |         |      |
|----------|--------|---------|--------|---------|-------|-------|---------|------|
| CCNE2    | 0.023  | 0.0282  | 0.2901 | 0.77787 | 0.858 | -6.53 | -0.3445 | none |
| ABLIM1   | 0.063  | 0.1038  | 0.2899 | 0.77804 | 0.858 | -6.53 | 0.60262 | none |
| VAT1     | -0.043 | -0.0737 | -0.29  | 0.77814 | 0.858 | -6.53 | 1.12593 | none |
| UBE2V1   | -0.025 | -0.0042 | -0.289 | 0.77835 | 0.858 | -6.53 | 0.88783 | none |
| CPPED1   | 0.023  | -0.0552 | 0.289  | 0.7787  | 0.859 | -6.53 | -0.5492 | none |
| ASB10    | -0.037 | -0.0317 | -0.289 | 0.77872 | 0.859 | -6.53 | 1.8263  | none |
| ST6GALNA | 0.036  | 0.0022  | 0.2888 | 0.77886 | 0.859 | -6.53 | 0.6046  | none |
| ABCG5    | 0.023  | 0.013   | 0.2887 | 0.77888 | 0.859 | -6.53 | -0.2221 | none |
| C6ORF106 | -0.035 | #####   | -0.289 | 0.77896 | 0.859 | -6.53 | 0.88914 | none |
| ALG8     | 0.041  | -0.1066 | 0.2884 | 0.77913 | 0.859 | -6.53 | -0.256  | none |
| GDF2     | 0.02   | 0.025   | 0.2884 | 0.77916 | 0.859 | -6.53 | 0       | none |
| CCL16    | -0.11  | 0.0739  | -0.288 | 0.77923 | 0.859 | -6.53 | 0.45922 | none |
| MT1H     | -0.081 | -0.0969 | -0.288 | 0.77923 | 0.859 | -6.53 | 0.45498 | none |
| DPY19L2  | -0.052 | -0.0206 | -0.288 | 0.7794  | 0.859 | -6.53 | 0.06676 | none |
| AL356585 | 0.03   | 0.0653  | 0.2878 | 0.77955 | 0.859 | -6.53 | 0.48708 | none |
| OR2L5    | -0.02  | -0.0083 | -0.288 | 0.7796  | 0.859 | -6.53 | 0.05088 | none |
| MIS12    | 0.027  | -0.0742 | 0.2875 | 0.77983 | 0.859 | -6.53 | 0.3487  | none |
| FGGY     | 0.05   | -0.0608 | 0.2872 | 0.78002 | 0.859 | -6.53 | -0.3931 | none |
| CBWD2    | -0.029 | -0.038  | -0.287 | 0.78005 | 0.859 | -6.53 | -0.4043 | none |
| MAPKAPK  | -0.027 | -0.0272 | -0.287 | 0.78042 | 0.86  | -6.53 | 1.66354 | none |
| CPA5     | 0.078  | -0.0614 | 0.2866 | 0.78045 | 0.86  | -6.53 | 0.3674  | none |
| MAP1B    | 0.027  | 0.0685  | 0.2861 | 0.78085 | 0.86  | -6.53 | -0.3592 | none |
| EXTL2    | 0.029  | -0.0053 | 0.286  | 0.78089 | 0.86  | -6.53 | 1.73565 | none |
| HSFX2    | 0.025  | 0.0042  | 0.286  | 0.78092 | 0.86  | -6.53 | -0.4876 | none |
| ZNF22    | -0.037 | -0.056  | -0.286 | 0.78095 | 0.86  | -6.53 | 0.15749 | none |
| PRM3     | 0.05   | 0.026   | 0.2859 | 0.78096 | 0.86  | -6.53 | 0.42353 | none |
| SPR      | -0.027 | 0.0843  | -0.286 | 0.78098 | 0.86  | -6.53 | 1.39937 | none |
| PRR20C   | 0.02   | 0.0252  | 0.2858 | 0.78106 | 0.86  | -6.53 | 0       | none |
| HPCAL1   | 0.048  | 0.0658  | 0.2858 | 0.78108 | 0.86  | -6.53 | 1.06631 | none |
| MFSD12   | 0.025  | 0.0275  | 0.2858 | 0.78109 | 0.86  | -6.53 | -0.7835 | none |
| KRAS     | -0.028 | -0.0402 | -0.285 | 0.78157 | 0.86  | -6.53 | 0.96885 | none |
| USH1C    | -0.044 | -0.0436 | -0.285 | 0.78184 | 0.861 | -6.53 | -0.4901 | none |
| CD7      | 0.035  | 0.0308  | 0.2843 | 0.78215 | 0.861 | -6.53 | 0.63329 | none |
| CLUL1    | 0.055  | 0.0512  | 0.2842 | 0.78227 | 0.861 | -6.53 | 1.10951 | none |
| TLDC2    | 0.029  | 0.068   | 0.2841 | 0.78231 | 0.861 | -6.53 | -0.1091 | none |
| SLC45A1  | 0.032  | -0.0054 | 0.2841 | 0.78231 | 0.861 | -6.53 | 0.70559 | none |
| USP17L15 | 0.03   | -0.0115 | 0.2841 | 0.78237 | 0.861 | -6.53 | 0.60174 | none |
| PHEX     | -0.049 | -0.0542 | -0.284 | 0.7824  | 0.861 | -6.53 | 0.70016 | none |
| FJX1     | 0.031  | #####   | 0.2836 | 0.78273 | 0.861 | -6.53 | -0.523  | none |
| TRAPPC5  | -0.057 | -0.1026 | -0.283 | 0.78282 | 0.861 | -6.53 | 0.91268 | none |

|          |        |         |        |         |       |       |         |      |
|----------|--------|---------|--------|---------|-------|-------|---------|------|
| PDCD1    | 0.03   | 0.1361  | 0.2832 | 0.78301 | 0.861 | -6.53 | 0.88565 | none |
| VPS28    | 0.111  | 0.0759  | 0.2832 | 0.78303 | 0.861 | -6.53 | 1.20279 | none |
| TIMM23   | -0.037 | -0.0819 | -0.283 | 0.78314 | 0.861 | -6.53 | -0.2699 | none |
| CYTH2    | -0.021 | -0.0284 | -0.283 | 0.78349 | 0.862 | -6.53 | -0.1474 | none |
| ODF1     | -0.021 | -0.0371 | -0.283 | 0.78351 | 0.862 | -6.53 | 0.54121 | none |
| EHHADH   | 0.045  | 0.09    | 0.2815 | 0.78425 | 0.863 | -6.53 | 0.11335 | none |
| MTRR     | 0.071  | 0.0653  | 0.2815 | 0.78426 | 0.863 | -6.53 | 0.71415 | none |
| RNF126   | -0.024 | 0.0145  | -0.281 | 0.7847  | 0.863 | -6.53 | 0.14672 | none |
| IER2     | -0.026 | 0.0322  | -0.281 | 0.78472 | 0.863 | -6.53 | 0.554   | none |
| SAXO1    | 0.028  | 0.0306  | 0.2802 | 0.7852  | 0.863 | -6.53 | 0.64061 | none |
| TMEM216  | 0.045  | -0.031  | 0.28   | 0.78537 | 0.863 | -6.53 | 0.61567 | none |
| MRGPRG   | -0.023 | #####   | -0.28  | 0.7854  | 0.863 | -6.53 | 0.71676 | none |
| MIPEP    | 0.035  | 0.0252  | 0.2794 | 0.78584 | 0.864 | -6.53 | 1.02119 | none |
| C11ORF24 | -0.034 | 0.0231  | -0.279 | 0.7859  | 0.864 | -6.53 | 1.38628 | none |
| LGALSL   | 0.057  | 0.0577  | 0.2791 | 0.78604 | 0.864 | -6.53 | 0.48943 | none |
| ATP2C2   | 0.034  | 0.0286  | 0.279  | 0.78614 | 0.864 | -6.53 | -0.5282 | none |
| ALDH1A3  | 0.047  | 0.0468  | 0.2789 | 0.78619 | 0.864 | -6.53 | 0.58762 | none |
| PDGFB    | 0.054  | 0.0279  | 0.2787 | 0.78638 | 0.864 | -6.53 | -0.1173 | none |
| KRTAP5-7 | 0.021  | 0.0232  | 0.2787 | 0.78638 | 0.864 | -6.53 | -0.473  | none |
| TSPAN12  | -0.021 | -0.0285 | -0.279 | 0.78639 | 0.864 | -6.53 | -0.2205 | none |
| WDR46    | -0.042 | 0.0117  | -0.278 | 0.78655 | 0.864 | -6.53 | 0.49745 | none |
| GTF2H4   | -0.07  | -0.1908 | -0.278 | 0.78681 | 0.864 | -6.53 | 0.76784 | none |
| ZNF34    | -0.05  | 0.0137  | -0.278 | 0.78697 | 0.865 | -6.53 | 1.32862 | none |
| SACM1L   | 0.042  | -0.002  | 0.2779 | 0.78697 | 0.865 | -6.53 | 0.47179 | none |
| RRAS     | -0.037 | 0.0272  | -0.278 | 0.78707 | 0.865 | -6.53 | 0.35825 | none |
| CHRM3    | -0.065 | -0.0577 | -0.277 | 0.78779 | 0.865 | -6.53 | 0.79636 | none |
| KCNK9    | 0.025  | 0.054   | 0.2766 | 0.78793 | 0.865 | -6.53 | -0.4046 | none |
| SLC6A9   | -0.043 | -0.0268 | -0.276 | 0.78809 | 0.866 | -6.53 | 0.12101 | none |
| TNC      | 0.023  | 0.0118  | 0.2762 | 0.78824 | 0.866 | -6.53 | 0.63819 | none |
| VTCN1    | -0.046 | -0.0501 | -0.276 | 0.78828 | 0.866 | -6.53 | 1.15939 | none |
| TMEM101  | -0.051 | -0.0924 | -0.276 | 0.78836 | 0.866 | -6.53 | -0.2185 | none |
| STC2     | 0.044  | 0.1424  | 0.2756 | 0.78865 | 0.866 | -6.53 | 0.10148 | none |
| TAB1     | -0.05  | 0.0277  | -0.275 | 0.78876 | 0.866 | -6.53 | 1.20635 | none |
| TMEM128  | -0.051 | -0.0912 | -0.275 | 0.78889 | 0.866 | -6.53 | 0.41265 | none |
| CCNDBP1  | 0.031  | -0.0592 | 0.2752 | 0.78899 | 0.866 | -6.53 | 0.37025 | none |
| LPAR1    | -0.021 | -0.0175 | -0.275 | 0.78901 | 0.866 | -6.53 | 0       | none |
| DDX31    | 0.047  | 0.127   | 0.2749 | 0.78921 | 0.866 | -6.53 | 1.15759 | none |
| DDX50    | -0.052 | 0.017   | -0.274 | 0.78964 | 0.867 | -6.53 | 1.2618  | none |
| TM4SF1   | -0.03  | -0.0242 | -0.274 | 0.78965 | 0.867 | -6.53 | -0.4265 | none |
| DAGLA    | 0.02   | 0.0142  | 0.2742 | 0.78972 | 0.867 | -6.53 | 0       | none |

|          |        |         |        |         |       |       |         |      |
|----------|--------|---------|--------|---------|-------|-------|---------|------|
| SPATA19  | -0.035 | -0.0337 | -0.274 | 0.79    | 0.867 | -6.53 | -0.3287 | none |
| PUF60    | -0.051 | 0.0215  | -0.274 | 0.79014 | 0.867 | -6.53 | 0.74296 | none |
| CYP26C1  | 0.019  | 0.0314  | 0.2736 | 0.79015 | 0.867 | -6.53 | 0       | none |
| SIRT6    | 0.026  | 0.0515  | 0.2735 | 0.79022 | 0.867 | -6.53 | 0.55689 | none |
| PCDHGC3  | 0.069  | 0.1303  | 0.2735 | 0.79025 | 0.867 | -6.53 | 1.00022 | none |
| GPR42    | -0.02  | -0.0251 | -0.273 | 0.7903  | 0.867 | -6.53 | 0       | none |
| CA10     | -0.058 | -0.0917 | -0.273 | 0.79051 | 0.867 | -6.53 | 1.32825 | none |
| ZNF428   | 0.04   | 0.0565  | 0.2728 | 0.79078 | 0.867 | -6.53 | -0.0461 | none |
| BSG      | -0.028 | -0.0035 | -0.272 | 0.79118 | 0.868 | -6.53 | 0.10885 | none |
| WDR13    | 0.046  | -0.0042 | 0.2721 | 0.79126 | 0.868 | -6.53 | -0.2444 | none |
| DTYMK    | -0.034 | -0.0405 | -0.272 | 0.79138 | 0.868 | -6.53 | -0.1511 | none |
| PIGF     | -0.064 | -0.1603 | -0.272 | 0.79153 | 0.868 | -6.53 | 1.20935 | none |
| LYPLA1   | 0.037  | -0.0833 | 0.2717 | 0.79155 | 0.868 | -6.53 | -0.0782 | none |
| C16ORF86 | -0.039 | -0.0454 | -0.272 | 0.79155 | 0.868 | -6.53 | 1.05208 | none |
| AGGF1    | 0.062  | 0.1832  | 0.2711 | 0.79202 | 0.868 | -6.53 | 1.46447 | none |
| MBOAT4   | -0.034 | -0.0322 | -0.271 | 0.79208 | 0.868 | -6.53 | 0.78176 | none |
| MRPL22   | 0.035  | -0.0054 | 0.2705 | 0.79244 | 0.869 | -6.53 | -0.5976 | none |
| TRAPPC10 | -0.04  | -0.0207 | -0.27  | 0.79304 | 0.869 | -6.53 | 0.50129 | none |
| TMEM176  | 0.03   | 0.0649  | 0.2691 | 0.79348 | 0.87  | -6.53 | 0.56927 | none |
| ADA      | -0.023 | -0.0373 | -0.269 | 0.7935  | 0.87  | -6.53 | 0.16921 | none |
| CXCL14   | 0.04   | 0.0099  | 0.2688 | 0.79371 | 0.87  | -6.53 | 1.06326 | none |
| GMPS     | 0.038  | 0.0533  | 0.2683 | 0.79409 | 0.87  | -6.53 | 0.94204 | none |
| FAM229B  | 0.054  | -0.0616 | 0.2683 | 0.79411 | 0.87  | -6.53 | -0.2452 | none |
| HLA-DPB1 | 0.062  | -0.0135 | 0.2682 | 0.7942  | 0.87  | -6.53 | -0.0833 | none |
| SEMA4A   | -0.04  | 0.0457  | -0.268 | 0.79425 | 0.87  | -6.53 | 0.19234 | none |
| PLAC9    | 0.049  | 0.1658  | 0.268  | 0.79437 | 0.87  | -6.53 | 0.97637 | none |
| SYT4     | -0.025 | 0.0157  | -0.268 | 0.7946  | 0.87  | -6.53 | -0.03   | none |
| ECI1     | -0.034 | -0.0358 | -0.268 | 0.79461 | 0.87  | -6.53 | 0.17726 | none |
| TLX2     | -0.036 | -0.0579 | -0.267 | 0.79513 | 0.871 | -6.53 | 0.26715 | none |
| MPHOSPH  | -0.044 | -0.1136 | -0.267 | 0.79515 | 0.871 | -6.53 | -0.0725 | none |
| FAM167A  | 0.022  | 0.0433  | 0.2661 | 0.79574 | 0.872 | -6.54 | 0.65695 | none |
| RNASE11  | -0.021 | -0.0209 | -0.266 | 0.79601 | 0.872 | -6.54 | 0.65623 | none |
| PLA2G2E  | 0.02   | 0.0116  | 0.2656 | 0.79613 | 0.872 | -6.54 | 1.20093 | none |
| FMO2     | 0.018  | 0.0269  | 0.2655 | 0.79618 | 0.872 | -6.54 | 1.35013 | none |
| KIF13A   | -0.026 | -0.0293 | -0.265 | 0.79636 | 0.872 | -6.54 | 0.33495 | none |
| KIAA0232 | -0.065 | 0.075   | -0.265 | 0.7964  | 0.872 | -6.54 | 0.0562  | none |
| ZNF671   | 0.024  | 0.0283  | 0.2652 | 0.79641 | 0.872 | -6.54 | 1.37969 | none |
| RAB39B   | -0.035 | -0.0101 | -0.265 | 0.79642 | 0.872 | -6.54 | 1.08212 | none |
| THAP7    | 0.026  | 0.0375  | 0.265  | 0.79659 | 0.872 | -6.54 | 0.93986 | none |
| ADAM19   | -0.06  | 0.0804  | -0.265 | 0.79666 | 0.872 | -6.54 | -0.0325 | none |

|          |        |         |        |         |       |       |         |      |
|----------|--------|---------|--------|---------|-------|-------|---------|------|
| HOXD8    | 0.02   | 0.0357  | 0.2645 | 0.79697 | 0.872 | -6.54 | 0.09219 | none |
| LRP8     | -0.046 | 0.109   | -0.264 | 0.79702 | 0.872 | -6.54 | 1.09731 | none |
| DIO1     | -0.038 | 0.0162  | -0.264 | 0.79725 | 0.872 | -6.54 | 1.58829 | none |
| MAP7D2   | 0.033  | 0.0132  | 0.2641 | 0.79726 | 0.872 | -6.54 | 1.47622 | none |
| PLA2G12A | -0.042 | -0.029  | -0.264 | 0.79747 | 0.873 | -6.54 | 1.51256 | none |
| CCDC80   | 0.031  | 0.017   | 0.2636 | 0.79761 | 0.873 | -6.54 | 0.02518 | none |
| TLR6     | -0.05  | -0.0752 | -0.263 | 0.79776 | 0.873 | -6.54 | -0.129  | none |
| FO538757 | 0.05   | 0.0661  | 0.2634 | 0.79778 | 0.873 | -6.54 | 0.36403 | none |
| GNGT1    | 0.023  | 0.0052  | 0.2631 | 0.79801 | 0.873 | -6.54 | 1.57739 | none |
| MPO      | 0.067  | 0.1121  | 0.263  | 0.79805 | 0.873 | -6.54 | 0.15628 | none |
| UHRF2    | -0.021 | -0.0236 | -0.263 | 0.7981  | 0.873 | -6.54 | 0.30517 | none |
| CHTF8    | -0.026 | -0.0369 | -0.263 | 0.7981  | 0.873 | -6.54 | 1.65356 | none |
| ALYREF   | -0.035 | #####   | -0.263 | 0.79819 | 0.873 | -6.54 | 1.29476 | none |
| SNX4     | -0.025 | -0.0629 | -0.263 | 0.79822 | 0.873 | -6.54 | -0.4303 | none |
| OGFOD3   | 0.033  | 0.0134  | 0.2626 | 0.79836 | 0.873 | -6.54 | 1.48365 | none |
| DDX46    | 0.08   | 0.2075  | 0.2624 | 0.7985  | 0.873 | -6.54 | 0.21036 | none |
| PATE3    | -0.021 | -0.0206 | -0.262 | 0.79862 | 0.873 | -6.54 | 1.81003 | none |
| AL592183 | -0.129 | -0.2012 | -0.262 | 0.79868 | 0.873 | -6.54 | 1.71067 | none |
| USP21    | 0.034  | 0.0109  | 0.2621 | 0.79877 | 0.873 | -6.54 | -0.3127 | none |
| KIAA1522 | 0.021  | 0.0338  | 0.2619 | 0.79891 | 0.873 | -6.54 | 0.86356 | none |
| CKMT1A   | -0.03  | -0.0428 | -0.261 | 0.79946 | 0.874 | -6.54 | -0.8316 | none |
| RAP2C    | -0.049 | -0.0875 | -0.261 | 0.79961 | 0.874 | -6.54 | 0.14359 | none |
| PPME1    | 0.018  | 0.014   | 0.2609 | 0.79962 | 0.874 | -6.54 | 1.09734 | none |
| RNASE2   | -0.028 | -0.0301 | -0.26  | 0.80008 | 0.874 | -6.54 | -0.2729 | none |
| PLEKHJ1  | 0.031  | 0.0176  | 0.2602 | 0.80016 | 0.874 | -6.54 | 0.71952 | none |
| RARB     | 0.027  | 0.0353  | 0.26   | 0.80029 | 0.875 | -6.54 | 1.36669 | none |
| CD58     | -0.034 | -0.1191 | -0.26  | 0.80042 | 0.875 | -6.54 | 0.27948 | none |
| TDRD7    | -0.031 | 0.0307  | -0.26  | 0.80049 | 0.875 | -6.54 | 1.33159 | none |
| OPN4     | -0.016 | 0.0063  | -0.26  | 0.80059 | 0.875 | -6.54 | 0       | none |
| MELTF    | 0.034  | 0.0028  | 0.2596 | 0.80059 | 0.875 | -6.54 | 1.36103 | none |
| SERINC2  | -0.022 | -0.0513 | -0.259 | 0.80079 | 0.875 | -6.54 | -0.1651 | none |
| NDFIP2   | 0.049  | -0.0248 | 0.259  | 0.80107 | 0.875 | -6.54 | 0.71623 | none |
| MRC1     | 0.021  | 0.061   | 0.2583 | 0.80157 | 0.875 | -6.54 | 0.66049 | none |
| TMEM251  | -0.052 | -0.0901 | -0.258 | 0.80178 | 0.876 | -6.54 | 1.04185 | none |
| HS3ST1   | 0.035  | 0.0018  | 0.258  | 0.80179 | 0.876 | -6.54 | -0.6428 | none |
| STXBP6   | -0.02  | -0.0066 | -0.258 | 0.80186 | 0.876 | -6.54 | -0.2193 | none |
| ITCH     | -0.101 | 0.0708  | -0.258 | 0.80201 | 0.876 | -6.54 | 1.05186 | none |
| PUSL1    | -0.032 | -0.0701 | -0.257 | 0.80263 | 0.876 | -6.54 | 1.23767 | none |
| CMTM7    | -0.037 | -0.1019 | -0.257 | 0.80265 | 0.876 | -6.54 | 0.43987 | none |
| HOXD13   | -0.019 | -0.0181 | -0.256 | 0.80303 | 0.877 | -6.54 | 1.32223 | none |

|          |        |         |        |         |       |       |         |      |
|----------|--------|---------|--------|---------|-------|-------|---------|------|
| COG2     | 0.047  | 0.0675  | 0.2562 | 0.80317 | 0.877 | -6.54 | 0.9926  | none |
| AZIN1    | 0.03   | -0.0741 | 0.2562 | 0.80318 | 0.877 | -6.54 | 1.21415 | none |
| ARMC12   | -0.019 | -0.001  | -0.256 | 0.80335 | 0.877 | -6.54 | -0.467  | none |
| CHRD     | 0.031  | 0.0684  | 0.2559 | 0.80339 | 0.877 | -6.54 | 0.10295 | none |
| RWDD3    | -0.03  | -0.1447 | -0.256 | 0.80344 | 0.877 | -6.54 | -0.0078 | none |
| RAP1GDS1 | -0.029 | -0.022  | -0.255 | 0.80401 | 0.877 | -6.54 | 1.47282 | none |
| TKTL2    | 0.018  | 0.0181  | 0.2548 | 0.80423 | 0.878 | -6.54 | 0       | none |
| UPK3A    | 0.025  | 0.025   | 0.2543 | 0.80461 | 0.878 | -6.54 | -0.0099 | none |
| OR52E4   | 0.018  | 0.0138  | 0.2543 | 0.80463 | 0.878 | -6.54 | 0.95298 | none |
| COMMD9   | 0.035  | -0.0325 | 0.2541 | 0.80475 | 0.878 | -6.54 | -0.0914 | none |
| TAS2R3   | 0.017  | 0.0415  | 0.2539 | 0.80486 | 0.878 | -6.54 | -0.4095 | none |
| XAB2     | -0.039 | 0.0832  | -0.254 | 0.80489 | 0.878 | -6.54 | 1.24812 | none |
| MAG      | 0.04   | 0.0359  | 0.2538 | 0.80498 | 0.878 | -6.54 | 0.61175 | none |
| STK19    | 0.097  | 0.2097  | 0.2536 | 0.80509 | 0.878 | -6.54 | 0.87516 | none |
| TRABD2B  | 0.042  | 0.0449  | 0.2534 | 0.80528 | 0.878 | -6.54 | 1.29537 | none |
| SNRPA    | -0.05  | -0.1    | -0.253 | 0.8054  | 0.878 | -6.54 | -0.2875 | none |
| CDCA3    | 0.022  | -0.0165 | 0.2532 | 0.80545 | 0.878 | -6.54 | 0.23904 | none |
| ESRRA    | -0.023 | 0.0316  | -0.253 | 0.80554 | 0.878 | -6.54 | 0.31464 | none |
| CDK7     | -0.104 | -0.2116 | -0.253 | 0.80555 | 0.878 | -6.54 | 0.35631 | none |
| HSP90AA1 | 0.085  | 0.2428  | 0.2527 | 0.80577 | 0.879 | -6.54 | 0.36081 | none |
| SP9      | -0.018 | -0.0176 | -0.253 | 0.80588 | 0.879 | -6.54 | 0       | none |
| AMY2B    | 0.055  | 0.0838  | 0.2526 | 0.80589 | 0.879 | -6.54 | 0.52729 | none |
| MUC4     | 0.02   | 0.0258  | 0.2523 | 0.80608 | 0.879 | -6.54 | 1.50705 | none |
| ZNF852   | 0.023  | 0.0678  | 0.2519 | 0.80639 | 0.879 | -6.54 | 0.97607 | none |
| CD1C     | -0.02  | -0.0246 | -0.252 | 0.80646 | 0.879 | -6.54 | 1.57816 | none |
| C2ORF40  | -0.043 | -0.0484 | -0.251 | 0.8068  | 0.879 | -6.54 | 0.85943 | none |
| SOHLH1   | -0.022 | -0.0122 | -0.251 | 0.80683 | 0.879 | -6.54 | 1.97996 | none |
| DGCR6L   | -0.036 | -0.0669 | -0.251 | 0.80696 | 0.879 | -6.54 | 0.34345 | none |
| PSMC3    | -0.034 | 0.0529  | -0.251 | 0.80711 | 0.879 | -6.54 | -0.2313 | none |
| CTDSP2   | 0.022  | 0.0175  | 0.2509 | 0.80713 | 0.879 | -6.54 | 0.49606 | none |
| EDEM2    | -0.024 | -0.0472 | -0.251 | 0.80719 | 0.879 | -6.54 | 0.1106  | none |
| PTDSS2   | 0.06   | 0.0154  | 0.2507 | 0.8073  | 0.88  | -6.54 | -0.9334 | none |
| DRC1     | 0.042  | 0.0511  | 0.2506 | 0.8074  | 0.88  | -6.54 | 1.22983 | none |
| PCIF1    | 0.023  | 0.0733  | 0.2505 | 0.80745 | 0.88  | -6.54 | -0.1979 | none |
| HYPK     | 0.045  | 0.0363  | 0.2504 | 0.80753 | 0.88  | -6.54 | 0.144   | none |
| C11ORF16 | 0.057  | -0.0419 | 0.2503 | 0.80759 | 0.88  | -6.54 | -0.1377 | none |
| TMEM99   | 0.053  | -0.1069 | 0.2499 | 0.8079  | 0.88  | -6.54 | 0.68859 | none |
| MGAT2    | -0.031 | -0.044  | -0.25  | 0.80799 | 0.88  | -6.54 | 1.07672 | none |
| ADGRB2   | -0.021 | 0.0056  | -0.249 | 0.80831 | 0.88  | -6.54 | -0.0942 | none |
| HMX2     | 0.017  | 0.0218  | 0.2492 | 0.80841 | 0.88  | -6.54 | 0       | none |

|         |        |         |        |         |       |       |         |      |
|---------|--------|---------|--------|---------|-------|-------|---------|------|
| ZNF628  | 0.057  | 0.0733  | 0.2487 | 0.80884 | 0.881 | -6.54 | 0.29985 | none |
| CENPVL3 | -0.016 | -0.0103 | -0.248 | 0.80909 | 0.881 | -6.54 | -0.3239 | none |
| PTOV1   | -0.023 | 0.0561  | -0.248 | 0.80944 | 0.881 | -6.54 | 0.49319 | none |
| SNX9    | -0.054 | 0.1004  | -0.248 | 0.8095  | 0.881 | -6.54 | 0.67332 | none |
| DPPA3   | -0.018 | #####   | -0.248 | 0.80958 | 0.881 | -6.54 | 2.00441 | none |
| ZC3H15  | -0.041 | 0.0497  | -0.248 | 0.80963 | 0.881 | -6.54 | 1.43719 | none |
| MKRN2   | -0.023 | -0.0541 | -0.248 | 0.80967 | 0.881 | -6.54 | 0.24898 | none |
| FAM234A | 0.055  | 0.1313  | 0.2467 | 0.81027 | 0.882 | -6.54 | 0.70792 | none |
| PNPLA5  | 0.025  | 0.0396  | 0.2467 | 0.8103  | 0.882 | -6.54 | 0.88042 | none |
| EMID1   | 0.037  | 0.0231  | 0.2462 | 0.81067 | 0.882 | -6.54 | 0.66061 | none |
| CDKN1A  | 0.027  | 0.0364  | 0.246  | 0.8108  | 0.882 | -6.54 | 0.36949 | none |
| CYP11B2 | -0.018 | -0.0185 | -0.246 | 0.81081 | 0.882 | -6.54 | 0       | none |
| RAB7B   | -0.019 | -0.0181 | -0.246 | 0.81089 | 0.882 | -6.54 | -0.5811 | none |
| CPXM1   | -0.025 | 0.0425  | -0.246 | 0.81112 | 0.882 | -6.54 | 0.44792 | none |
| GSTM4   | -0.034 | -0.0262 | -0.245 | 0.81124 | 0.883 | -6.54 | 1.42489 | none |
| VPS51   | -0.019 | -0.0174 | -0.245 | 0.81127 | 0.883 | -6.54 | 1.10862 | none |
| ABHD17C | -0.034 | -0.0229 | -0.245 | 0.81144 | 0.883 | -6.54 | 0.58268 | none |
| AP1M1   | -0.032 | -0.053  | -0.245 | 0.8116  | 0.883 | -6.54 | 0.93808 | none |
| RIMBP3B | -0.017 | -0.0125 | -0.245 | 0.81173 | 0.883 | -6.54 | 1.53579 | none |
| PCDHB3  | -0.018 | -0.018  | -0.244 | 0.81196 | 0.883 | -6.54 | 0       | none |
| SLN     | -0.024 | -0.0318 | -0.244 | 0.81208 | 0.883 | -6.54 | -0.4182 | none |
| TP53TG3 | -0.018 | -0.0156 | -0.244 | 0.8123  | 0.883 | -6.54 | 0.55338 | none |
| B3GNT7  | 0.022  | 0.0138  | 0.2438 | 0.81248 | 0.883 | -6.54 | -0.6161 | none |
| ZBTB14  | 0.048  | 0.1413  | 0.2437 | 0.81253 | 0.883 | -6.54 | 1.1456  | none |
| GRIN3B  | -0.017 | -0.0051 | -0.243 | 0.81296 | 0.884 | -6.54 | -0.1524 | none |
| RNF34   | -0.02  | -0.0414 | -0.243 | 0.81309 | 0.884 | -6.54 | -0.3299 | none |
| CERS6   | -0.017 | 0.0156  | -0.243 | 0.81309 | 0.884 | -6.54 | 0.89264 | none |
| APBA3   | 0.025  | 0.01    | 0.243  | 0.8131  | 0.884 | -6.54 | 0.66435 | none |
| TM9SF2  | -0.031 | -0.0847 | -0.243 | 0.81315 | 0.884 | -6.54 | 1.22231 | none |
| CLPP    | -0.03  | -0.0675 | -0.243 | 0.81334 | 0.884 | -6.54 | 1.16083 | none |
| RNF225  | -0.023 | -0.0234 | -0.243 | 0.81342 | 0.884 | -6.54 | -0.238  | none |
| PALMD   | 0.024  | 0.0232  | 0.2425 | 0.81345 | 0.884 | -6.54 | 0.17205 | none |
| FAM9A   | 0.018  | 0.0228  | 0.2425 | 0.81347 | 0.884 | -6.54 | 1.15748 | none |
| FAM43A  | 0.034  | -0.0021 | 0.2423 | 0.81362 | 0.884 | -6.54 | -0.231  | none |
| FNIP2   | 0.049  | 0.1452  | 0.2423 | 0.81365 | 0.884 | -6.54 | -0.079  | none |
| FIP1L1  | 0.038  | 0.1265  | 0.2421 | 0.81378 | 0.884 | -6.54 | 1.27353 | none |
| CSRP3   | 0.024  | 0.0306  | 0.241  | 0.81462 | 0.885 | -6.54 | 0.50094 | none |
| STX1A   | 0.06   | 0.2055  | 0.241  | 0.81463 | 0.885 | -6.54 | 0.92737 | none |
| EFEMP1  | 0.024  | 0.0257  | 0.2403 | 0.81513 | 0.885 | -6.54 | 1.56461 | none |
| LFNG    | -0.036 | -0.043  | -0.24  | 0.81548 | 0.886 | -6.54 | -0.131  | none |



|           |        |         |        |         |       |       |         |      |
|-----------|--------|---------|--------|---------|-------|-------|---------|------|
| HIST1H4D  | 0.042  | -0.1228 | 0.2398 | 0.81552 | 0.886 | -6.54 | 0.36302 | none |
| PATZ1     | 0.025  | 0.1053  | 0.2396 | 0.81564 | 0.886 | -6.54 | 0.59899 | none |
| NCF4      | -0.029 | -0.0776 | -0.239 | 0.81584 | 0.886 | -6.54 | 1.49284 | none |
| PLA2G4A   | 0.023  | #####   | 0.2392 | 0.81595 | 0.886 | -6.54 | 0.95701 | none |
| CORO2B    | -0.017 | 0.0121  | -0.239 | 0.81603 | 0.886 | -6.54 | 0.27855 | none |
| C2ORF76   | 0.065  | -0.0351 | 0.239  | 0.8161  | 0.886 | -6.54 | 0.59691 | none |
| TMEM200   | -0.018 | -0.0266 | -0.239 | 0.81617 | 0.886 | -6.54 | 1.47    | none |
| ADRA1D    | -0.017 | -0.0039 | -0.239 | 0.8162  | 0.886 | -6.54 | 1.73185 | none |
| SPAG11A   | 0.018  | 0.0185  | 0.2387 | 0.8163  | 0.886 | -6.54 | 0       | none |
| MST1      | -0.052 | 0.1115  | -0.239 | 0.81644 | 0.886 | -6.54 | 1.7826  | none |
| MCRIP2    | 0.03   | 0.0169  | 0.2382 | 0.81674 | 0.886 | -6.54 | 1.57912 | none |
| NIN       | 0.066  | 0.1892  | 0.2378 | 0.81697 | 0.887 | -6.54 | 0.2731  | none |
| SYS1-DBNI | 0.041  | 0.059   | 0.2378 | 0.817   | 0.887 | -6.54 | 1.62907 | none |
| ADAMTS3   | 0.016  | 0.0104  | 0.2377 | 0.81705 | 0.887 | -6.54 | 0.74034 | none |
| SNX12     | 0.052  | -0.0644 | 0.2377 | 0.81706 | 0.887 | -6.54 | 0.53269 | none |
| ADCK2     | 0.036  | -0.0207 | 0.2375 | 0.81725 | 0.887 | -6.54 | 0.33438 | none |
| CLIC6     | -0.016 | -0.0021 | -0.237 | 0.8175  | 0.887 | -6.54 | 0       | none |
| HIRIP3    | 0.023  | 0.1062  | 0.237  | 0.8176  | 0.887 | -6.54 | -0.1405 | none |
| RASA1     | 0.026  | 0.0425  | 0.2368 | 0.81774 | 0.887 | -6.54 | 0.48449 | none |
| KLHL25    | 0.02   | 0.0601  | 0.2368 | 0.81779 | 0.887 | -6.54 | 1.41135 | none |
| GJC2      | -0.017 | 0.0048  | -0.236 | 0.8183  | 0.888 | -6.54 | -0.1024 | none |
| RNF11     | 0.032  | -0.0217 | 0.236  | 0.81835 | 0.888 | -6.54 | 1.75381 | none |
| BIRC5     | 0.032  | -0.0705 | 0.236  | 0.8184  | 0.888 | -6.54 | -0.1243 | none |
| THAP10    | -0.017 | -0.0167 | -0.236 | 0.8185  | 0.888 | -6.54 | 0       | none |
| SLC20A2   | -0.025 | 0.0346  | -0.236 | 0.81856 | 0.888 | -6.54 | 0.45781 | none |
| COIL      | -0.03  | 0.0195  | -0.236 | 0.81856 | 0.888 | -6.54 | 0.33608 | none |
| RIN2      | -0.028 | -0.0209 | -0.236 | 0.81864 | 0.888 | -6.54 | 0.58323 | none |
| FCRL5     | 0.016  | 0.0289  | 0.2355 | 0.81874 | 0.888 | -6.54 | 0.24864 | none |
| C4ORF48   | -0.065 | -0.0402 | -0.235 | 0.81944 | 0.888 | -6.54 | 0.82792 | none |
| CXCR3     | 0.024  | 0.0175  | 0.2339 | 0.81993 | 0.889 | -6.54 | 0.2112  | none |
| KRR1      | -0.046 | 0.0498  | -0.234 | 0.82012 | 0.889 | -6.54 | 0.83273 | none |
| CCDC192   | -0.089 | -0.0476 | -0.232 | 0.82104 | 0.89  | -6.54 | 0.31255 | none |
| KRT79     | -0.026 | -0.0241 | -0.232 | 0.82108 | 0.89  | -6.54 | 1.75143 | none |
| OR10P1    | 0.03   | 0.0289  | 0.2324 | 0.82109 | 0.89  | -6.54 | 1.01309 | none |
| ATP6V1C2  | -0.035 | 0.002   | -0.232 | 0.82111 | 0.89  | -6.54 | 0.24237 | none |
| FAM57A    | -0.043 | -0.0033 | -0.232 | 0.82125 | 0.89  | -6.54 | 0.94187 | none |
| ZFYVE27   | -0.028 | 0.0377  | -0.232 | 0.82134 | 0.89  | -6.54 | 0.40891 | none |
| SNX10     | -0.023 | -0.0269 | -0.232 | 0.82138 | 0.89  | -6.54 | 1.72062 | none |
| ST14      | 0.02   | 0.042   | 0.2316 | 0.82166 | 0.89  | -6.54 | 0.21232 | none |
| COMMD2    | 0.027  | -0.0577 | 0.2313 | 0.82189 | 0.89  | -6.54 | 0.22496 | none |

|         |        |         |        |         |       |       |         |            |
|---------|--------|---------|--------|---------|-------|-------|---------|------------|
| EVPLL   | 0.024  | 0.0277  | 0.2308 | 0.82229 | 0.891 | -6.54 | 0.99277 | none       |
| DOC2B   | 0.021  | 0.0064  | 0.2307 | 0.82239 | 0.891 | -6.54 | 0.10109 | none       |
| DGAT2   | -0.027 | -0.0117 | -0.23  | 0.82253 | 0.891 | -6.54 | 0.86417 | none       |
| GARS    | -0.034 | 0.029   | -0.23  | 0.82259 | 0.891 | -6.54 | 1.49613 | none       |
| DDX28   | -0.024 | -0.037  | -0.23  | 0.82325 | 0.891 | -6.54 | 1.24879 | none       |
| POLR3H  | -0.026 | -0.0033 | -0.23  | 0.82326 | 0.891 | -6.54 | 0.62753 | none       |
| GSK3A   | 0.041  | 0.0553  | 0.2294 | 0.82337 | 0.891 | -6.54 | 0.91415 | none       |
| ZMYND12 | -0.054 | -0.0591 | -0.229 | 0.8234  | 0.891 | -6.54 | 1.67663 | none       |
| SPRTN   | -0.04  | -0.0103 | -0.229 | 0.82342 | 0.891 | -6.54 | 1.39567 | none       |
| SLC46A3 | -0.027 | -0.0956 | -0.229 | 0.82344 | 0.891 | -6.54 | 0.89464 | none       |
| PDCD2   | -0.03  | -0.0794 | -0.229 | 0.82353 | 0.892 | -6.54 | 1.41465 | none       |
| BRSK1   | -0.039 | -0.0501 | -0.229 | 0.8236  | 0.892 | -6.54 | 0.18812 | none       |
| SPRYD3  | 0.031  | 0.0194  | 0.2289 | 0.82369 | 0.892 | -6.54 | 0.93114 | none       |
| TIGD4   | -0.016 | -0.0019 | -0.229 | 0.82376 | 0.892 | -6.54 | 0.37369 | none       |
| CDCP1   | -0.029 | -0.0328 | -0.229 | 0.82384 | 0.892 | -6.54 | 0.90344 | none       |
| ZACN    | -0.033 | -0.0374 | -0.229 | 0.82385 | 0.892 | -6.55 | 0.66419 | none       |
| POLR2H  | -0.038 | -0.1389 | -0.229 | 0.82392 | 0.892 | -6.55 | 0.42979 | none       |
| TRIM23  | 0.047  | 0.0109  | 0.2286 | 0.82395 | 0.892 | -6.55 | 1.54232 | none       |
| PCDHGA4 | -0.021 | -0.0216 | -0.228 | 0.82416 | 0.892 | -6.55 | 1.53809 | none       |
| ZNF512  | 0.025  | 0.0457  | 0.2282 | 0.82423 | 0.892 | -6.55 | -0.4553 | none       |
| ADPRH   | -0.028 | -0.0526 | -0.228 | 0.82447 | 0.892 | -6.55 | 0.11832 | none       |
| APLN    | 0.015  | 0.0124  | 0.2277 | 0.82463 | 0.892 | -6.55 | 0.82875 | none       |
| CCL4L2  | -0.029 | 0.0437  | -0.228 | 0.82463 | 0.892 | -6.55 | 0.97611 | none       |
| WNT5B   | -0.02  | #####   | -0.228 | 0.82475 | 0.892 | -6.55 | -0.1579 | none       |
| NSDHL   | -0.018 | -0.0344 | -0.227 | 0.82481 | 0.892 | -6.55 | -0.5599 | none       |
| ZNF581  | -0.028 | -0.0883 | -0.227 | 0.82481 | 0.892 | -6.55 | 1.45458 | none       |
| CLIP4   | 0.044  | -0.079  | 0.2274 | 0.82484 | 0.892 | -6.55 | -0.2918 | none       |
| BAALC   | -0.024 | #####   | -0.227 | 0.82515 | 0.892 | -6.55 | -0.0539 | none       |
| NR1H4   | -0.033 | 0.0159  | -0.227 | 0.82524 | 0.892 | -6.55 | 0.89971 | none       |
| ZDHHC2  | -0.037 | -0.0602 | -0.227 | 0.82543 | 0.893 | -6.55 | 0.46172 | none       |
| ILKAP   | 0.025  | #####   | 0.2263 | 0.82569 | 0.893 | -6.55 | 1.06349 | none       |
| SEC14L2 | 0.047  | 0.0806  | 0.2262 | 0.82578 | 0.893 | -6.55 | 0.72697 | none       |
| LAYN    | -0.037 | -0.0306 | -0.226 | 0.82594 | 0.893 | -6.55 | 1.12291 | none       |
| ADRA2B  | -0.016 | -0.0047 | -0.226 | 0.82609 | 0.893 | -6.55 | 0       | none       |
| ASCL2   | 0.02   | 0.0613  | 0.2257 | 0.82612 | 0.893 | -6.55 | 0.03152 | none       |
| ABCC11  | -0.031 | -0.0222 | -0.226 | 0.82614 | 0.893 | -6.55 | 1.40429 | none       |
| THAP11  | -0.02  | -0.0064 | -0.226 | 0.82617 | 0.893 | -6.55 | 2.12486 | AA-related |
| MAML3   | -0.026 | -0.0134 | -0.226 | 0.82624 | 0.893 | -6.55 | 0.77691 | none       |
| HTR3D   | 0.019  | 0.0377  | 0.2253 | 0.82647 | 0.893 | -6.55 | 0.38278 | none       |
| LRRC8C  | -0.032 | 0.0017  | -0.225 | 0.82649 | 0.893 | -6.55 | 1.3156  | none       |

|          |        |         |        |         |       |       |         |      |
|----------|--------|---------|--------|---------|-------|-------|---------|------|
| HOXB4    | -0.021 | 0.0023  | -0.225 | 0.82668 | 0.893 | -6.55 | 1.09163 | none |
| ANKRD49  | -0.034 | -0.102  | -0.225 | 0.82689 | 0.893 | -6.55 | -0.1435 | none |
| ARRDC2   | -0.025 | 0.054   | -0.224 | 0.82705 | 0.894 | -6.55 | 1.00931 | none |
| CDCA2    | 0.062  | 0.2015  | 0.2244 | 0.82713 | 0.894 | -6.55 | 0.7098  | none |
| HIST2H4A | 0.065  | 0.0468  | 0.2243 | 0.82723 | 0.894 | -6.55 | 0.18825 | none |
| IL31     | 0.029  | 0.0883  | 0.2242 | 0.82725 | 0.894 | -6.55 | 1.21639 | none |
| FPGS     | 0.027  | -0.0025 | 0.2239 | 0.82749 | 0.894 | -6.55 | 0.72165 | none |
| HELT     | -0.018 | -0.018  | -0.224 | 0.82751 | 0.894 | -6.55 | 1.29038 | none |
| CD46     | -0.028 | -0.0162 | -0.224 | 0.82758 | 0.894 | -6.55 | 1.68011 | none |
| RABEPK   | 0.031  | -0.0484 | 0.2235 | 0.82779 | 0.894 | -6.55 | -0.0871 | none |
| C1QL1    | -0.015 | -0.0104 | -0.223 | 0.82781 | 0.894 | -6.55 | 0.85138 | none |
| ADGRG7   | 0.016  | 0.0302  | 0.2232 | 0.82803 | 0.894 | -6.55 | 0.10208 | none |
| KHNYN    | 0.035  | 0.1354  | 0.2232 | 0.82806 | 0.894 | -6.55 | -0.1302 | none |
| PHF10    | 0.033  | 0.0663  | 0.223  | 0.82818 | 0.894 | -6.55 | 0.93158 | none |
| SHISA3   | 0.022  | -0.0096 | 0.223  | 0.82818 | 0.894 | -6.55 | 0.51721 | none |
| ATP7B    | -0.034 | -0.0159 | -0.223 | 0.82831 | 0.894 | -6.55 | -0.2021 | none |
| ACVR1B   | -0.024 | 0.071   | -0.223 | 0.82832 | 0.894 | -6.55 | 0.44044 | none |
| HCAR2    | -0.017 | -0.0117 | -0.223 | 0.82835 | 0.894 | -6.55 | 0       | none |
| POPDC2   | -0.044 | -0.0053 | -0.223 | 0.82849 | 0.894 | -6.55 | 1.00427 | none |
| IDUA     | -0.056 | -0.0744 | -0.223 | 0.82852 | 0.894 | -6.55 | -0.0172 | none |
| ARMCX2   | 0.047  | 0.1283  | 0.2225 | 0.82856 | 0.894 | -6.55 | 0.71405 | none |
| PCDHGB3  | -0.015 | -0.014  | -0.222 | 0.82864 | 0.894 | -6.55 | 1.39984 | none |
| PGRMC1   | 0.025  | -0.0122 | 0.2223 | 0.8287  | 0.894 | -6.55 | 0.75014 | none |
| AMH      | 0.023  | 0.0297  | 0.2222 | 0.82875 | 0.894 | -6.55 | 0.62502 | none |
| KLHL4    | -0.015 | 0.002   | -0.222 | 0.82901 | 0.894 | -6.55 | 0.34122 | none |
| LIMS3    | -0.052 | -0.1098 | -0.222 | 0.82911 | 0.894 | -6.55 | -0.5151 | none |
| ALKBH7   | 0.044  | -0.0546 | 0.2216 | 0.82926 | 0.895 | -6.55 | 0.42136 | none |
| VPS26B   | -0.03  | -0.0289 | -0.221 | 0.82938 | 0.895 | -6.55 | -0.0974 | none |
| FBXO4    | -0.054 | -0.0647 | -0.221 | 0.82946 | 0.895 | -6.55 | 0.93927 | none |
| FAM180B  | 0.019  | 0.0203  | 0.2212 | 0.82952 | 0.895 | -6.55 | 0.2135  | none |
| DPH6     | -0.053 | -0.2141 | -0.221 | 0.82961 | 0.895 | -6.55 | -0.1007 | none |
| LVRN     | 0.028  | 0.022   | 0.2211 | 0.82962 | 0.895 | -6.55 | 0.65512 | none |
| LUZP6    | -0.061 | -0.1392 | -0.221 | 0.82989 | 0.895 | -6.55 | -0.3736 | none |
| PLAG1    | 0.029  | 0.0213  | 0.2207 | 0.82993 | 0.895 | -6.55 | 0.29897 | none |
| SOCS6    | -0.024 | -0.024  | -0.22  | 0.83018 | 0.895 | -6.55 | 0.52856 | none |
| BTF3L4   | -0.04  | -0.1456 | -0.22  | 0.83025 | 0.895 | -6.55 | 1.05518 | none |
| FOXA2    | -0.016 | -0.0161 | -0.22  | 0.83031 | 0.895 | -6.55 | 0       | none |
| ZAR1L    | 0.017  | 0.0132  | 0.2198 | 0.83063 | 0.895 | -6.55 | 1.60832 | none |
| SLC5A9   | 0.016  | 0.0181  | 0.2196 | 0.83075 | 0.895 | -6.55 | -0.3929 | none |
| PRODH2   | -0.03  | 0.0381  | -0.22  | 0.83076 | 0.895 | -6.55 | 0.11013 | none |

|           |        |         |        |         |       |       |         |      |
|-----------|--------|---------|--------|---------|-------|-------|---------|------|
| SLC26A9   | -0.024 | -0.0234 | -0.22  | 0.83077 | 0.895 | -6.55 | -0.5473 | none |
| RBBP8NL   | 0.017  | 0.0161  | 0.2195 | 0.83083 | 0.895 | -6.55 | 0.19303 | none |
| NECAB1    | -0.016 | -0.0065 | -0.219 | 0.83095 | 0.895 | -6.55 | -0.1415 | none |
| C4ORF50   | 0.014  | 0.0317  | 0.2192 | 0.83102 | 0.895 | -6.55 | 0.53253 | none |
| PRG2      | -0.024 | 0.0107  | -0.219 | 0.83108 | 0.895 | -6.55 | 0.13637 | none |
| GDE1      | -0.024 | -0.0465 | -0.219 | 0.83128 | 0.896 | -6.55 | 1.3436  | none |
| ZFPM1     | 0.048  | 0.1505  | 0.2186 | 0.8315  | 0.896 | -6.55 | 0.39836 | none |
| DAZL      | -0.017 | -0.0328 | -0.219 | 0.83159 | 0.896 | -6.55 | 1.38822 | none |
| CLCA4     | -0.042 | -0.0416 | -0.218 | 0.8316  | 0.896 | -6.55 | 1.6425  | none |
| MID2      | 0.042  | -0.0045 | 0.2184 | 0.83166 | 0.896 | -6.55 | 0.58471 | none |
| MAP2K5    | -0.032 | -0.0548 | -0.218 | 0.83179 | 0.896 | -6.55 | 0.98151 | none |
| PSTPIP1   | 0.023  | 0.0563  | 0.2181 | 0.8319  | 0.896 | -6.55 | -0.1984 | none |
| RRAD      | 0.038  | 0.0397  | 0.2177 | 0.83219 | 0.896 | -6.55 | 0.34531 | none |
| SRC       | -0.032 | 0.0571  | -0.217 | 0.83235 | 0.896 | -6.55 | 0.80507 | none |
| PGBD2     | 0.023  | 0.0036  | 0.2171 | 0.83268 | 0.897 | -6.55 | -0.1088 | none |
| TDRD10    | 0.045  | 0.0834  | 0.2169 | 0.83282 | 0.897 | -6.55 | 0.68844 | none |
| FAM114A   | -0.039 | -0.0142 | -0.217 | 0.83296 | 0.897 | -6.55 | -0.1643 | none |
| PITPNC1   | 0.035  | 0.0835  | 0.2166 | 0.83302 | 0.897 | -6.55 | 1.25275 | none |
| DLL4      | -0.017 | -0.0166 | -0.216 | 0.83316 | 0.897 | -6.55 | 0.32708 | none |
| DBNL      | 0.019  | 0.0352  | 0.2163 | 0.83329 | 0.897 | -6.55 | 0.0707  | none |
| STARD3    | -0.033 | -0.0628 | -0.216 | 0.83357 | 0.897 | -6.55 | 0.40101 | none |
| RPRM      | -0.018 | -0.0058 | -0.216 | 0.83361 | 0.897 | -6.55 | 1.08454 | none |
| LRRC4     | -0.031 | 0.0079  | -0.216 | 0.83361 | 0.897 | -6.55 | 0.42983 | none |
| HES6      | -0.069 | -0.0087 | -0.216 | 0.83364 | 0.897 | -6.55 | 0.98427 | none |
| RCAN2     | -0.024 | -0.0692 | -0.216 | 0.83368 | 0.897 | -6.55 | 0.38226 | none |
| MS4A1     | 0.036  | 0.0351  | 0.2156 | 0.83377 | 0.897 | -6.55 | 0.93998 | none |
| AAMP      | -0.021 | 0.0061  | -0.215 | 0.83396 | 0.897 | -6.55 | -0.0408 | none |
| LGALS2    | -0.033 | -0.0326 | -0.215 | 0.83403 | 0.897 | -6.55 | -0.4829 | none |
| POLR1C    | 0.02   | -0.0168 | 0.2152 | 0.83411 | 0.897 | -6.55 | -0.2111 | none |
| HIST2H3P5 | 0.02   | 0.0375  | 0.2151 | 0.83416 | 0.897 | -6.55 | 0.7396  | none |
| KLK3      | 0.016  | 0.0157  | 0.215  | 0.83426 | 0.897 | -6.55 | 1.53512 | none |
| IL36B     | 0.018  | 0.0219  | 0.2148 | 0.83438 | 0.897 | -6.55 | -0.089  | none |
| BUB1B-PA  | 0.015  | #####   | 0.2146 | 0.83451 | 0.898 | -6.55 | -0.4229 | none |
| GSDMD     | -0.029 | -0.0664 | -0.214 | 0.83487 | 0.898 | -6.55 | 1.34883 | none |
| ZNF181    | -0.036 | 0.0677  | -0.214 | 0.83495 | 0.898 | -6.55 | 1.43907 | none |
| NUDT22    | 0.032  | -0.0421 | 0.214  | 0.83501 | 0.898 | -6.55 | 0.40103 | none |
| TAF12     | 0.026  | -0.0063 | 0.2139 | 0.83505 | 0.898 | -6.55 | 1.13843 | none |
| PRMT5     | -0.027 | -0.0338 | -0.214 | 0.83525 | 0.898 | -6.55 | 1.09121 | none |
| GPT       | -0.021 | -0.012  | -0.213 | 0.83543 | 0.898 | -6.55 | 0.70926 | none |
| RASD2     | -0.016 | -0.0042 | -0.213 | 0.8357  | 0.898 | -6.55 | 0       | none |

|          |        |         |        |         |       |       |         |      |
|----------|--------|---------|--------|---------|-------|-------|---------|------|
| SLC9A3R1 | 0.022  | 0.0611  | 0.2131 | 0.83571 | 0.898 | -6.55 | -0.0235 | none |
| RGS14    | 0.025  | 0.0744  | 0.2126 | 0.83603 | 0.899 | -6.55 | 0.97308 | none |
| ARMC7    | -0.026 | 0.0216  | -0.212 | 0.83614 | 0.899 | -6.55 | 1.48761 | none |
| RGL3     | -0.053 | 0.0731  | -0.212 | 0.8362  | 0.899 | -6.55 | 1.5866  | none |
| TATDN2   | 0.034  | 0.1522  | 0.2124 | 0.8362  | 0.899 | -6.55 | 1.63721 | none |
| H2AFY2   | 0.028  | 0.0652  | 0.2123 | 0.83629 | 0.899 | -6.55 | 0.75467 | none |
| MESP2    | -0.041 | -0.0301 | -0.212 | 0.83651 | 0.899 | -6.55 | 1.95993 | none |
| FAM49A   | 0.027  | 0.017   | 0.2118 | 0.83667 | 0.899 | -6.55 | 1.25174 | none |
| NME3     | 0.034  | -0.0028 | 0.2117 | 0.83673 | 0.899 | -6.55 | 1.14908 | none |
| CELF6    | -0.02  | -0.0093 | -0.211 | 0.83698 | 0.899 | -6.55 | 1.01496 | none |
| HSPG2    | 0.026  | 0.0703  | 0.2114 | 0.83701 | 0.899 | -6.55 | 1.39957 | none |
| POLR3D   | 0.04   | 0.1609  | 0.2112 | 0.83713 | 0.899 | -6.55 | 0.804   | none |
| TCN2     | -0.025 | #####   | -0.211 | 0.8372  | 0.899 | -6.55 | -0.553  | none |
| AK2      | -0.014 | 0.0097  | -0.211 | 0.83738 | 0.899 | -6.55 | 0.2127  | none |
| OXSM     | 0.031  | -0.032  | 0.2107 | 0.83751 | 0.9   | -6.55 | 0.36404 | none |
| PAX9     | -0.02  | 0.0384  | -0.21  | 0.83782 | 0.9   | -6.55 | 1.14585 | none |
| TRAPPC6B | 0.036  | -0.075  | 0.2103 | 0.83784 | 0.9   | -6.55 | 1.25559 | none |
| MB21D2   | -0.022 | -0.0525 | -0.21  | 0.83788 | 0.9   | -6.55 | 1.0547  | none |
| ETV7     | -0.018 | -0.0274 | -0.21  | 0.83798 | 0.9   | -6.55 | 0.24434 | none |
| GSTM3    | -0.049 | -0.1338 | -0.21  | 0.83802 | 0.9   | -6.55 | 1.16595 | none |
| CDCP2    | 0.014  | 0.0218  | 0.21   | 0.83804 | 0.9   | -6.55 | -0.2615 | none |
| CCDC3    | 0.016  | 0.0286  | 0.21   | 0.83804 | 0.9   | -6.55 | 0.49628 | none |
| RBP4     | -0.023 | -0.0417 | -0.21  | 0.83813 | 0.9   | -6.55 | 0.35894 | none |
| VSIG10L  | 0.024  | 0.0865  | 0.2094 | 0.83845 | 0.9   | -6.55 | 0.45968 | none |
| SLC22A5  | -0.018 | -0.0941 | -0.209 | 0.8385  | 0.9   | -6.55 | -0.4183 | none |
| DYNLL2   | -0.022 | 0.0178  | -0.209 | 0.8385  | 0.9   | -6.55 | 0.53457 | none |
| ZDHHC15  | -0.03  | -0.0376 | -0.209 | 0.83868 | 0.9   | -6.55 | -0.3186 | none |
| SAMSN1   | -0.018 | -0.1158 | -0.209 | 0.8389  | 0.9   | -6.55 | -0.1534 | none |
| KDM1A    | -0.034 | 0.1378  | -0.209 | 0.83897 | 0.9   | -6.55 | 1.34593 | none |
| RAB10    | 0.021  | -0.0094 | 0.2088 | 0.83897 | 0.9   | -6.55 | -0.2186 | none |
| ZFYVE19  | 0.036  | 0.0758  | 0.2085 | 0.83917 | 0.9   | -6.55 | 1.10195 | none |
| NELFB    | -0.025 | 0.0403  | -0.208 | 0.8392  | 0.9   | -6.55 | 0.78426 | none |
| CNOT9    | -0.021 | -0.039  | -0.208 | 0.83922 | 0.9   | -6.55 | -0.5685 | none |
| EGR4     | -0.02  | 0.0244  | -0.208 | 0.83929 | 0.9   | -6.55 | 0.48579 | none |
| FZD2     | 0.015  | 0.0243  | 0.208  | 0.83958 | 0.901 | -6.55 | 1.00831 | none |
| MRPS22   | 0.025  | -0.0504 | 0.2075 | 0.83992 | 0.901 | -6.55 | 0.4121  | none |
| B4GALT7  | 0.027  | 0.0304  | 0.2071 | 0.8402  | 0.901 | -6.55 | 0.09853 | none |
| PTGDR    | 0.025  | 0.0384  | 0.2071 | 0.84022 | 0.901 | -6.55 | 1.10733 | none |
| NRARP    | 0.018  | 0.0271  | 0.207  | 0.84029 | 0.901 | -6.55 | 0.68276 | none |
| KCND1    | 0.025  | 0.0803  | 0.206  | 0.84105 | 0.902 | -6.55 | -0.0432 | none |

|         |        |         |        |         |       |       |         |      |
|---------|--------|---------|--------|---------|-------|-------|---------|------|
| CFAP70  | 0.022  | 0.0108  | 0.206  | 0.84106 | 0.902 | -6.55 | 1.58126 | none |
| KCNK13  | 0.016  | 0.0207  | 0.2058 | 0.84126 | 0.902 | -6.55 | 0.09648 | none |
| RPP30   | -0.025 | -0.1117 | -0.206 | 0.84137 | 0.902 | -6.55 | -0.0662 | none |
| NEMP1   | 0.038  | 0.0407  | 0.2053 | 0.84162 | 0.902 | -6.55 | 1.19771 | none |
| BCL2L1  | 0.026  | 0.0386  | 0.205  | 0.84183 | 0.902 | -6.55 | 0.11688 | none |
| ARRDC1  | -0.024 | -0.0458 | -0.205 | 0.84203 | 0.903 | -6.55 | 1.5542  | none |
| IZUMO4  | 0.059  | -0.0027 | 0.2047 | 0.84205 | 0.903 | -6.55 | 0.27504 | none |
| INPP4B  | 0.048  | 0.055   | 0.2045 | 0.8422  | 0.903 | -6.55 | 0.10445 | none |
| TTC5    | -0.021 | -0.0538 | -0.204 | 0.84225 | 0.903 | -6.55 | 0.21427 | none |
| ODF3L1  | 0.016  | 0.0291  | 0.2043 | 0.84235 | 0.903 | -6.55 | 0.83781 | none |
| PNMA5   | -0.017 | -0.0092 | -0.204 | 0.8424  | 0.903 | -6.55 | 0.13144 | none |
| PAIP1   | -0.025 | -0.0353 | -0.204 | 0.84245 | 0.903 | -6.55 | 1.76816 | none |
| WT1     | 0.025  | 0.0608  | 0.2041 | 0.84248 | 0.903 | -6.55 | 0.50006 | none |
| CYP4A11 | -0.029 | -0.0023 | -0.204 | 0.84253 | 0.903 | -6.55 | 1.84494 | none |
| HDDC3   | 0.027  | 0.0068  | 0.2039 | 0.84264 | 0.903 | -6.55 | 0.78846 | none |
| CCL1    | -0.054 | -0.0884 | -0.204 | 0.84266 | 0.903 | -6.55 | 1.07795 | none |
| P4HA1   | -0.016 | -0.0247 | -0.203 | 0.84317 | 0.903 | -6.55 | 1.47532 | none |
| EGFLAM  | -0.027 | -0.0196 | -0.203 | 0.8433  | 0.903 | -6.55 | -0.3533 | none |
| HNRNPL  | 0.027  | 0.0767  | 0.2026 | 0.84362 | 0.904 | -6.55 | -0.3154 | none |
| ANO1    | 0.035  | 0.0825  | 0.2025 | 0.84377 | 0.904 | -6.55 | 1.13295 | none |
| QRFR    | 0.016  | 0.0173  | 0.202  | 0.84411 | 0.904 | -6.55 | -0.2748 | none |
| LYNX1   | 0.029  | 0.0393  | 0.2019 | 0.84417 | 0.904 | -6.55 | -0.4568 | none |
| EFCAB13 | 0.023  | 0.0078  | 0.2018 | 0.84427 | 0.904 | -6.55 | 0.77566 | none |
| AMD1    | 0.021  | -0.0799 | 0.2017 | 0.84432 | 0.904 | -6.55 | 0.05874 | none |
| PLA2G4F | -0.041 | -0.0738 | -0.202 | 0.84439 | 0.904 | -6.55 | 0.37441 | none |
| SETMAR  | 0.03   | 0.0571  | 0.2009 | 0.84496 | 0.905 | -6.55 | 0.82855 | none |
| SYT16   | 0.037  | 0.0103  | 0.2007 | 0.84511 | 0.905 | -6.55 | 0.24544 | none |
| SCAP    | 0.027  | 0.0998  | 0.2003 | 0.8454  | 0.905 | -6.55 | 0.83806 | none |
| PLAGL2  | 0.02   | 0.093   | 0.2    | 0.84562 | 0.905 | -6.55 | 0.75028 | none |
| LIN37   | -0.027 | 0.0106  | -0.199 | 0.84602 | 0.905 | -6.55 | 0.08439 | none |
| RAB31   | 0.032  | -0.018  | 0.1985 | 0.84677 | 0.906 | -6.55 | 0.54753 | none |
| SH2D2A  | -0.018 | 0.0722  | -0.198 | 0.84698 | 0.906 | -6.55 | 0.53993 | none |
| XKRX    | 0.017  | -0.0132 | 0.1982 | 0.847   | 0.906 | -6.55 | 0.11541 | none |
| FITM1   | 0.014  | 0.0356  | 0.1982 | 0.84702 | 0.906 | -6.55 | 1.64608 | none |
| PCDHA1  | 0.014  | 0.0268  | 0.1981 | 0.84704 | 0.906 | -6.55 | 0       | none |
| DEFB129 | -0.022 | -0.0218 | -0.198 | 0.84712 | 0.906 | -6.55 | 1.19411 | none |
| SLC16A3 | -0.026 | -0.025  | -0.198 | 0.84725 | 0.906 | -6.55 | 0.70894 | none |
| PDE2A   | 0.047  | 0.0742  | 0.1974 | 0.84757 | 0.907 | -6.55 | 1.12653 | none |
| GPR18   | -0.04  | -0.1494 | -0.197 | 0.84782 | 0.907 | -6.55 | 0.31267 | none |
| MAN1A1  | 0.019  | 0.0057  | 0.197  | 0.8479  | 0.907 | -6.55 | 0.88058 | none |

|          |        |         |        |         |       |       |         |      |
|----------|--------|---------|--------|---------|-------|-------|---------|------|
| SERPIN1  | 0.015  | 0.0154  | 0.1968 | 0.84805 | 0.907 | -6.55 | -0.6806 | none |
| KLF1     | -0.013 | -0.014  | -0.197 | 0.84805 | 0.907 | -6.55 | 1.64649 | none |
| SYNJ1    | 0.022  | #####   | 0.1967 | 0.84814 | 0.907 | -6.55 | 0.95356 | none |
| BEND5    | 0.056  | 0.0738  | 0.1965 | 0.84826 | 0.907 | -6.55 | 1.40219 | none |
| LRP3     | -0.031 | 0.0038  | -0.197 | 0.84827 | 0.907 | -6.55 | 0.13915 | none |
| APOBEC1  | -0.018 | -0.0179 | -0.196 | 0.84861 | 0.907 | -6.55 | 0.6787  | none |
| SLC44A1  | -0.017 | -0.0703 | -0.196 | 0.84875 | 0.907 | -6.55 | -0.2123 | none |
| ANKRD65  | 0.018  | 0.045   | 0.1959 | 0.84877 | 0.907 | -6.55 | 1.77624 | none |
| FOXD4L1  | -0.014 | #####   | -0.196 | 0.8489  | 0.907 | -6.55 | 0       | none |
| MAP4K3   | 0.035  | 0.0409  | 0.1956 | 0.84895 | 0.907 | -6.55 | 0.95441 | none |
| TUBB1    | 0.014  | 0.0352  | 0.1955 | 0.84905 | 0.908 | -6.55 | 1.56501 | none |
| TMEM207  | -0.015 | -0.0151 | -0.195 | 0.84907 | 0.908 | -6.55 | -0.2598 | none |
| PFKP     | 0.028  | 0.149   | 0.1954 | 0.84915 | 0.908 | -6.55 | 0.54049 | none |
| NDUFS7   | -0.034 | -0.0581 | -0.195 | 0.84946 | 0.908 | -6.55 | 1.13493 | none |
| UBE2D1   | 0.025  | -0.0207 | 0.1949 | 0.8495  | 0.908 | -6.55 | 1.09984 | none |
| SERPINA9 | 0.02   | 0.029   | 0.1943 | 0.84997 | 0.908 | -6.55 | 1.68678 | none |
| CASP9    | 0.021  | -0.0332 | 0.1943 | 0.85001 | 0.908 | -6.55 | -0.708  | none |
| CDC25C   | -0.034 | -0.0388 | -0.194 | 0.85002 | 0.908 | -6.55 | 0.10872 | none |
| FCMR     | -0.019 | -0.0338 | -0.194 | 0.8501  | 0.908 | -6.55 | 0.38619 | none |
| FNDCC11  | 0.015  | 0.0381  | 0.194  | 0.85019 | 0.908 | -6.55 | 0.19534 | none |
| GRID2IP  | -0.013 | 0.007   | -0.193 | 0.85073 | 0.909 | -6.55 | 0.88273 | none |
| BTBD10   | 0.025  | -0.0152 | 0.1932 | 0.85084 | 0.909 | -6.55 | 0.27381 | none |
| POLR3B   | -0.027 | 0.0321  | -0.193 | 0.85098 | 0.909 | -6.55 | 0.51721 | none |
| CFC1     | -0.03  | -0.0159 | -0.193 | 0.85104 | 0.909 | -6.55 | 0.74998 | none |
| TRPC7    | 0.016  | 0.0159  | 0.1926 | 0.85127 | 0.909 | -6.55 | -0.6239 | none |
| RGPD1    | 0.04   | 0.0356  | 0.1925 | 0.85131 | 0.909 | -6.55 | 0.75276 | none |
| ACBD3    | 0.048  | 0.1611  | 0.1924 | 0.85142 | 0.909 | -6.55 | 0.40717 | none |
| NMB      | 0.037  | 0.0128  | 0.1917 | 0.85196 | 0.91  | -6.55 | 0.33776 | none |
| GRIK4    | 0.033  | 0.0487  | 0.1916 | 0.85205 | 0.91  | -6.55 | 0.19947 | none |
| EBF4     | 0.025  | 0.0504  | 0.1915 | 0.85209 | 0.91  | -6.55 | -0.2379 | none |
| AC005779 | -0.027 | -0.0268 | -0.191 | 0.85232 | 0.91  | -6.55 | 1.59282 | none |
| ANKRD37  | -0.032 | -0.0127 | -0.191 | 0.85235 | 0.91  | -6.55 | 1.4735  | none |
| ANXA7    | -0.02  | -0.11   | -0.191 | 0.85246 | 0.91  | -6.55 | 0.16576 | none |
| RASIP1   | 0.021  | 0.033   | 0.1907 | 0.85267 | 0.91  | -6.55 | 1.24324 | none |
| CYLC2    | 0.059  | 0.1082  | 0.1906 | 0.85278 | 0.91  | -6.55 | -0.6806 | none |
| CSH1     | 0.019  | 0.0403  | 0.1905 | 0.85284 | 0.91  | -6.55 | 0.28062 | none |
| LRPAP1   | -0.028 | 0.0899  | -0.19  | 0.85306 | 0.91  | -6.55 | 0.0981  | none |
| ZBTB34   | 0.015  | 0.0201  | 0.1902 | 0.85308 | 0.91  | -6.55 | -0.1796 | none |
| TTC21A   | 0.059  | 0.1052  | 0.1901 | 0.85321 | 0.91  | -6.55 | -0.2758 | none |
| ZNF516   | 0.022  | 0.0803  | 0.1899 | 0.85335 | 0.91  | -6.55 | 0.9309  | none |

|         |        |         |        |         |       |       |         |      |
|---------|--------|---------|--------|---------|-------|-------|---------|------|
| LRWD1   | 0.019  | 0.0729  | 0.1898 | 0.85339 | 0.91  | -6.55 | 0.533   | none |
| ERF     | -0.048 | 0.0742  | -0.19  | 0.85339 | 0.91  | -6.55 | 0.10883 | none |
| COL9A2  | 0.045  | 0.1331  | 0.1896 | 0.85358 | 0.911 | -6.55 | 1.16846 | none |
| RASD1   | 0.019  | 0.0175  | 0.1895 | 0.85361 | 0.911 | -6.55 | 1.03047 | none |
| RAB7A   | 0.019  | 0.0332  | 0.1895 | 0.85366 | 0.911 | -6.55 | 0.91227 | none |
| TSEN15  | 0.029  | -0.0568 | 0.1893 | 0.8538  | 0.911 | -6.55 | 1.02567 | none |
| IPMK    | 0.014  | -0.026  | 0.1891 | 0.85394 | 0.911 | -6.55 | 0.72342 | none |
| GAD2    | 0.014  | 0.0345  | 0.1891 | 0.85395 | 0.911 | -6.55 | 1.11437 | none |
| OR5C1   | -0.016 | -0.016  | -0.189 | 0.85396 | 0.911 | -6.55 | -0.6121 | none |
| HNRNPH2 | 0.019  | -0.0504 | 0.1891 | 0.85396 | 0.911 | -6.55 | 0.90545 | none |
| MAT1A   | -0.016 | -0.0165 | -0.189 | 0.85427 | 0.911 | -6.55 | -0.1522 | none |
| BNIP3L  | 0.016  | 0.0076  | 0.1887 | 0.85427 | 0.911 | -6.55 | -0.2898 | none |
| GABRR2  | 0.028  | 0.0278  | 0.1883 | 0.85455 | 0.911 | -6.55 | 0.41618 | none |
| B3GALT4 | 0.014  | 0.0161  | 0.1882 | 0.85463 | 0.911 | -6.55 | 0.72654 | none |
| CORO1C  | -0.023 | -0.0124 | -0.188 | 0.85472 | 0.911 | -6.55 | 1.16565 | none |
| NPB     | -0.015 | -0.0267 | -0.188 | 0.85491 | 0.911 | -6.55 | -0.4974 | none |
| NBPF9   | 0.033  | 0.1958  | 0.1876 | 0.85504 | 0.911 | -6.55 | 0.44533 | none |
| TSPAN11 | 0.015  | 0.0215  | 0.1875 | 0.85512 | 0.911 | -6.55 | -0.325  | none |
| MSX2    | -0.013 | -0.0052 | -0.187 | 0.85517 | 0.911 | -6.55 | -0.6895 | none |
| DGKQ    | 0.026  | 0.0578  | 0.1874 | 0.85526 | 0.911 | -6.55 | -0.2384 | none |
| WNK2    | 0.032  | 0.103   | 0.1873 | 0.85533 | 0.911 | -6.55 | 1.0355  | none |
| PCDH8   | -0.013 | -0.0084 | -0.187 | 0.85535 | 0.911 | -6.55 | -0.5515 | none |
| MAP1A   | 0.014  | 0.0589  | 0.1871 | 0.85548 | 0.911 | -6.55 | 0.34781 | none |
| HESX1   | -0.023 | -0.04   | -0.187 | 0.85549 | 0.911 | -6.55 | -0.4067 | none |
| NODAL   | 0.014  | 0.0439  | 0.1869 | 0.85558 | 0.911 | -6.55 | 0.38287 | none |
| USP6    | -0.016 | 0.0317  | -0.187 | 0.85558 | 0.911 | -6.55 | 1.20783 | none |
| 1-Sep   | 0.024  | 0.0643  | 0.1869 | 0.85564 | 0.911 | -6.55 | -0.0203 | none |
| THOC6   | -0.019 | -0.0124 | -0.187 | 0.8559  | 0.912 | -6.55 | 0.48287 | none |
| C1ORF35 | 0.023  | 0.0304  | 0.1865 | 0.85595 | 0.912 | -6.55 | -0.1125 | none |
| MTRNR2L | 0.02   | -0.0078 | 0.1861 | 0.85619 | 0.912 | -6.55 | 0.9718  | none |
| HYPM    | -0.029 | -0.0285 | -0.186 | 0.85661 | 0.912 | -6.55 | 1.20276 | none |
| OXT     | 0.023  | 0.0893  | 0.1855 | 0.85666 | 0.912 | -6.55 | 0.86115 | none |
| FAM83D  | 0.017  | 0.0041  | 0.1854 | 0.85673 | 0.912 | -6.55 | 0.93034 | none |
| SYT10   | 0.012  | 0.0159  | 0.1852 | 0.85694 | 0.912 | -6.55 | 0.77493 | none |
| VTN     | -0.014 | -0.026  | -0.185 | 0.85698 | 0.912 | -6.55 | -0.7647 | none |
| TMEM200 | 0.014  | 0.0161  | 0.1851 | 0.85698 | 0.912 | -6.55 | -0.6503 | none |
| CYB5R4  | -0.037 | -0.099  | -0.185 | 0.8572  | 0.912 | -6.55 | 1.06732 | none |
| FAM50A  | 0.039  | 0.1775  | 0.1846 | 0.85734 | 0.912 | -6.55 | 1.25127 | none |
| TEX10   | 0.02   | -0.011  | 0.1846 | 0.85735 | 0.912 | -6.55 | 1.27186 | none |
| ZFAND1  | -0.028 | -0.14   | -0.184 | 0.85745 | 0.912 | -6.55 | 0.34923 | none |



|          |        |         |        |         |       |       |         |      |
|----------|--------|---------|--------|---------|-------|-------|---------|------|
| UBE2E1   | -0.039 | -0.0778 | -0.184 | 0.85746 | 0.912 | -6.55 | 0.52914 | none |
| TMEM107  | -0.028 | -0.1285 | -0.184 | 0.85751 | 0.912 | -6.55 | 0.63227 | none |
| RCE1     | 0.024  | 0.0333  | 0.1843 | 0.85759 | 0.913 | -6.55 | 1.01189 | none |
| RANBP2   | -0.067 | 0.1971  | -0.184 | 0.85806 | 0.913 | -6.56 | 0.41386 | none |
| AEN      | -0.02  | 0.0593  | -0.184 | 0.8581  | 0.913 | -6.56 | 1.5506  | none |
| GDPD3    | -0.029 | 0.0304  | -0.183 | 0.85825 | 0.913 | -6.56 | 1.11645 | none |
| NUDT13   | 0.065  | 0.0321  | 0.1834 | 0.85828 | 0.913 | -6.56 | 0.40478 | none |
| HDAC10   | 0.02   | 0.0207  | 0.1833 | 0.85837 | 0.913 | -6.56 | 1.29229 | none |
| GCAT     | -0.025 | -0.036  | -0.183 | 0.85844 | 0.913 | -6.56 | 0.94289 | none |
| ADAMTS1  | 0.038  | 0.0538  | 0.1828 | 0.85876 | 0.913 | -6.56 | -0.5788 | none |
| NOB1     | -0.025 | 0.0612  | -0.182 | 0.859   | 0.913 | -6.56 | 1.53438 | none |
| GOLT1A   | -0.023 | -0.0122 | -0.182 | 0.85901 | 0.913 | -6.56 | 0.31731 | none |
| B4GALT6  | 0.02   | 0.0177  | 0.1823 | 0.85909 | 0.913 | -6.56 | -0.5565 | none |
| BUD31    | 0.018  | -0.0244 | 0.1823 | 0.8591  | 0.913 | -6.56 | -0.6192 | none |
| DLEU7    | 0.015  | 0.0113  | 0.1821 | 0.85925 | 0.914 | -6.56 | 0.38296 | none |
| ZAP70    | -0.024 | 0.0121  | -0.181 | 0.86019 | 0.915 | -6.56 | 1.169   | none |
| KCNAB1   | 0.049  | #####   | 0.1806 | 0.8604  | 0.915 | -6.56 | 0.1864  | none |
| TXNDC16  | 0.042  | 0.0114  | 0.1805 | 0.86049 | 0.915 | -6.56 | 0.99161 | none |
| RAET1G   | -0.014 | -0.0184 | -0.18  | 0.86097 | 0.915 | -6.56 | -0.6403 | none |
| FCGR3B   | 0.018  | 0.018   | 0.1792 | 0.86151 | 0.916 | -6.56 | 0.96175 | none |
| TNPO3    | 0.028  | 0.0771  | 0.1788 | 0.86176 | 0.916 | -6.56 | 0.49318 | none |
| DEFB119  | -0.031 | -0.0306 | -0.179 | 0.86182 | 0.916 | -6.56 | 1.20526 | none |
| LRRIQ3   | -0.022 | -0.022  | -0.179 | 0.86186 | 0.916 | -6.56 | 1.48562 | none |
| C16ORF87 | -0.019 | -0.0726 | -0.178 | 0.8622  | 0.916 | -6.56 | -0.0262 | none |
| PHC1     | 0.032  | 0.0682  | 0.1781 | 0.8623  | 0.916 | -6.56 | 0.07239 | none |
| MMP24    | -0.012 | 0.0283  | -0.178 | 0.86252 | 0.916 | -6.56 | 1.23677 | none |
| UBXN2B   | -0.03  | -0.0931 | -0.178 | 0.86257 | 0.916 | -6.56 | 1.08455 | none |
| PIK3CA   | -0.044 | 0.1004  | -0.178 | 0.86265 | 0.916 | -6.56 | 0.86239 | none |
| ZNF263   | 0.035  | 0.1378  | 0.1777 | 0.86266 | 0.916 | -6.56 | -0.1649 | none |
| DDOST    | -0.02  | -0.0782 | -0.176 | 0.86363 | 0.917 | -6.56 | 0.40023 | none |
| PELO     | -0.016 | #####   | -0.176 | 0.8637  | 0.917 | -6.56 | 1.46756 | none |
| CISD3    | 0.029  | 0.028   | 0.1761 | 0.86386 | 0.918 | -6.56 | 0.10289 | none |
| POLR2M   | -0.026 | -0.0534 | -0.176 | 0.86399 | 0.918 | -6.56 | 1.05678 | none |
| C1ORF189 | -0.016 | 0.0132  | -0.176 | 0.86405 | 0.918 | -6.56 | 0.0054  | none |
| TCEAL2   | 0.014  | 0.0165  | 0.1758 | 0.86407 | 0.918 | -6.56 | 0.53536 | none |
| TTC1     | 0.019  | 0.0638  | 0.1752 | 0.86452 | 0.918 | -6.56 | -0.0518 | none |
| PGPEP1L  | -0.019 | 0.0164  | -0.175 | 0.86452 | 0.918 | -6.56 | -0.3845 | none |
| ELOVL3   | -0.013 | 0.0048  | -0.175 | 0.86477 | 0.918 | -6.56 | -0.1428 | none |
| PLPP6    | 0.023  | 0.0152  | 0.1748 | 0.86488 | 0.918 | -6.56 | 0.95615 | none |
| CFAP44   | 0.033  | 0.052   | 0.1746 | 0.86503 | 0.918 | -6.56 | 0.90492 | none |

|          |        |         |        |         |       |       |         |      |
|----------|--------|---------|--------|---------|-------|-------|---------|------|
| GRM3     | -0.012 | 0.0029  | -0.174 | 0.86558 | 0.919 | -6.56 | -0.2622 | none |
| TMEM178  | -0.02  | -0.0025 | -0.173 | 0.86635 | 0.92  | -6.56 | -0.3159 | none |
| BLOC1S2  | 0.02   | -0.0146 | 0.1727 | 0.86648 | 0.92  | -6.56 | -0.1943 | none |
| DYRK2    | 0.028  | -0.0196 | 0.1724 | 0.86669 | 0.92  | -6.56 | 0.46542 | none |
| CYP2S1   | 0.026  | 0.0432  | 0.1721 | 0.86688 | 0.92  | -6.56 | 1.38209 | none |
| CFAP97   | -0.028 | 0.029   | -0.172 | 0.86716 | 0.92  | -6.56 | 1.71537 | none |
| MAPK7    | 0.027  | 0.1259  | 0.1718 | 0.86717 | 0.92  | -6.56 | 0.33457 | none |
| CDH5     | -0.017 | -0.0286 | -0.172 | 0.86737 | 0.92  | -6.56 | 0.66543 | none |
| MYRF     | 0.023  | 0.0189  | 0.1715 | 0.8674  | 0.92  | -6.56 | -0.4668 | none |
| ZNF358   | -0.03  | #####   | -0.171 | 0.86741 | 0.92  | -6.56 | 1.0867  | none |
| CENPB    | -0.022 | #####   | -0.171 | 0.86778 | 0.921 | -6.56 | -0.7112 | none |
| SIKE1    | 0.023  | -0.0898 | 0.1705 | 0.86812 | 0.921 | -6.56 | 0.04324 | none |
| KRT32    | -0.012 | -0.0067 | -0.17  | 0.86814 | 0.921 | -6.56 | 0       | none |
| C8ORF82  | 0.015  | #####   | 0.1704 | 0.86824 | 0.921 | -6.56 | -0.1344 | none |
| IPCEF1   | 0.03   | 0.0063  | 0.1702 | 0.86833 | 0.921 | -6.56 | 0.65913 | none |
| RLN1     | -0.02  | 0.0057  | -0.17  | 0.86836 | 0.921 | -6.56 | 1.22731 | none |
| ADGRG3   | 0.02   | 0.0589  | 0.1702 | 0.86838 | 0.921 | -6.56 | 0.21757 | none |
| HIST1H4B | -0.02  | -0.0397 | -0.17  | 0.86848 | 0.921 | -6.56 | 1.05785 | none |
| RNF123   | 0.034  | 0.0721  | 0.1695 | 0.86893 | 0.921 | -6.56 | 1.28094 | none |
| DUSP11   | 0.019  | -0.082  | 0.1694 | 0.86895 | 0.921 | -6.56 | 0.21781 | none |
| SPANXD   | 0.019  | 0.0464  | 0.1688 | 0.86941 | 0.922 | -6.56 | 0.66625 | none |
| TTC9     | 0.021  | 0.0483  | 0.1687 | 0.86951 | 0.922 | -6.56 | 0.2255  | none |
| SWT1     | -0.027 | 0.009   | -0.168 | 0.8698  | 0.922 | -6.56 | 1.46252 | none |
| SERPINA1 | 0.039  | 0.1184  | 0.1683 | 0.86981 | 0.922 | -6.56 | 0.42341 | none |
| SERTAD2  | 0.025  | 0.0195  | 0.1682 | 0.86987 | 0.922 | -6.56 | 0.5431  | none |
| ARX      | -0.056 | 0.1219  | -0.168 | 0.87002 | 0.922 | -6.56 | 0.53995 | none |
| FAM170A  | -0.013 | -0.0126 | -0.168 | 0.87007 | 0.922 | -6.56 | -0.0315 | none |
| CCL17    | 0.036  | 0.1157  | 0.1679 | 0.87011 | 0.922 | -6.56 | 1.45469 | none |
| YEATS4   | 0.023  | -0.0327 | 0.1672 | 0.87063 | 0.922 | -6.56 | 0.93396 | none |
| AQP11    | -0.029 | -0.0215 | -0.167 | 0.87063 | 0.922 | -6.56 | 0.75649 | none |
| CTDNEP1  | -0.027 | 0.0807  | -0.167 | 0.87073 | 0.922 | -6.56 | 0.2514  | none |
| ANKRD34  | -0.034 | -0.0145 | -0.167 | 0.87081 | 0.922 | -6.56 | 0.66939 | none |
| ACADM    | 0.016  | 0.013   | 0.167  | 0.87084 | 0.922 | -6.56 | 0.34076 | none |
| FAM151A  | 0.014  | 0.0011  | 0.167  | 0.87085 | 0.922 | -6.56 | 1.28052 | none |
| GAD1     | 0.033  | 0.0587  | 0.1668 | 0.87095 | 0.923 | -6.56 | -0.1575 | none |
| FCGR1A   | 0.022  | 0.0355  | 0.1667 | 0.87101 | 0.923 | -6.56 | -0.6786 | none |
| MIOS     | -0.026 | 0.0177  | -0.167 | 0.87112 | 0.923 | -6.56 | 1.53704 | none |
| CALR3    | -0.019 | 0.0087  | -0.166 | 0.87126 | 0.923 | -6.56 | 1.07585 | none |
| PLG      | 0.035  | -0.0146 | 0.1664 | 0.87127 | 0.923 | -6.56 | 0.38145 | none |
| ZNF296   | -0.014 | 0.0366  | -0.166 | 0.87129 | 0.923 | -6.56 | 1.66031 | none |

|          |        |         |        |         |       |       |         |      |
|----------|--------|---------|--------|---------|-------|-------|---------|------|
| SMAP1    | -0.031 | 0.0664  | -0.166 | 0.87133 | 0.923 | -6.56 | 0.96629 | none |
| UCP2     | -0.018 | -0.0365 | -0.166 | 0.87137 | 0.923 | -6.56 | 1.27315 | none |
| LUC7L3   | 0.037  | 0.1424  | 0.1657 | 0.87183 | 0.923 | -6.56 | 0.75    | none |
| NSMF     | -0.037 | 0.1173  | -0.165 | 0.87197 | 0.923 | -6.56 | 0.08578 | none |
| NR4A2    | -0.024 | 0.0806  | -0.165 | 0.87198 | 0.923 | -6.56 | 0.56145 | none |
| EFCAB9   | -0.018 | -0.0184 | -0.165 | 0.87206 | 0.923 | -6.56 | 1.06067 | none |
| AMY1B    | -0.016 | 0.0042  | -0.165 | 0.87258 | 0.924 | -6.56 | 1.7753  | none |
| EIF4E3   | 0.025  | -0.079  | 0.1646 | 0.87267 | 0.924 | -6.56 | 0.1093  | none |
| FCRLB    | -0.015 | -0.0339 | -0.164 | 0.87316 | 0.924 | -6.56 | 1.8424  | none |
| IKZF2    | -0.018 | -0.0387 | -0.164 | 0.87325 | 0.924 | -6.56 | 1.73884 | none |
| STK24    | 0.022  | 0.0184  | 0.1636 | 0.87338 | 0.924 | -6.56 | -0.9254 | none |
| FOXE3    | 0.011  | 0.0218  | 0.1636 | 0.8734  | 0.924 | -6.56 | 0       | none |
| CITED2   | 0.038  | 0.0686  | 0.1634 | 0.87355 | 0.924 | -6.56 | 0.63732 | none |
| PAGE5    | -0.03  | -0.1134 | -0.163 | 0.87359 | 0.924 | -6.56 | 0.90061 | none |
| PCSK1N   | 0.043  | 0.0946  | 0.163  | 0.8739  | 0.924 | -6.56 | -0.5698 | none |
| TCN1     | -0.018 | -0.0116 | -0.163 | 0.87392 | 0.924 | -6.56 | 1.91248 | none |
| CRYZ     | -0.027 | -0.1407 | -0.163 | 0.87395 | 0.924 | -6.56 | 0.05704 | none |
| CAMTA1   | -0.03  | -0.1027 | -0.163 | 0.87397 | 0.924 | -6.56 | -0.0938 | none |
| PFKFB4   | -0.015 | 0.0638  | -0.163 | 0.87425 | 0.925 | -6.56 | 1.35049 | none |
| ROPN1L   | 0.026  | -0.0437 | 0.1624 | 0.87433 | 0.925 | -6.56 | 0.96182 | none |
| EDA2R    | -0.012 | 0.0062  | -0.162 | 0.87449 | 0.925 | -6.56 | 0.01022 | none |
| TTC30B   | -0.011 | -0.0106 | -0.162 | 0.8746  | 0.925 | -6.56 | 0.90941 | none |
| ASXL1    | 0.023  | 0.0669  | 0.162  | 0.87467 | 0.925 | -6.56 | -0.04   | none |
| EFCAB1   | -0.014 | 0.0163  | -0.162 | 0.87467 | 0.925 | -6.56 | 0.70034 | none |
| CYB5B    | -0.018 | -0.0979 | -0.162 | 0.87473 | 0.925 | -6.56 | 0.35687 | none |
| KLK12    | 0.014  | 0.0142  | 0.1614 | 0.87509 | 0.925 | -6.56 | 1.43031 | none |
| NKD2     | -0.014 | 0.0145  | -0.161 | 0.87521 | 0.925 | -6.56 | 0.61505 | none |
| SRSF8    | -0.015 | -0.0647 | -0.161 | 0.87533 | 0.925 | -6.56 | 0.30206 | none |
| A4GNT    | -0.012 | -0.0115 | -0.161 | 0.87548 | 0.925 | -6.56 | 0       | none |
| PTPN5    | 0.013  | 0.0342  | 0.1608 | 0.87554 | 0.925 | -6.56 | 0.55593 | none |
| CLDN1    | -0.023 | 0.0017  | -0.161 | 0.87562 | 0.925 | -6.56 | 1.45492 | none |
| LOXL3    | 0.017  | 0.0724  | 0.1603 | 0.87593 | 0.926 | -6.56 | 0.72445 | none |
| 9-Sep    | 0.031  | 0.1023  | 0.16   | 0.8762  | 0.926 | -6.56 | 0.82847 | none |
| UNC50    | 0.025  | -0.0925 | 0.1599 | 0.87626 | 0.926 | -6.56 | 0.7103  | none |
| ARHGEF35 | -0.018 | -0.0444 | -0.16  | 0.87629 | 0.926 | -6.56 | 0.64452 | none |
| ZNF536   | -0.014 | 0.0111  | -0.16  | 0.87654 | 0.926 | -6.56 | -0.3178 | none |
| TCP10    | 0.015  | 0.0313  | 0.1594 | 0.87661 | 0.926 | -6.56 | -0.5043 | none |
| MMP17    | -0.026 | -0.0343 | -0.159 | 0.87662 | 0.926 | -6.56 | 1.13134 | none |
| SASH3    | 0.027  | 0.1173  | 0.1593 | 0.87671 | 0.926 | -6.56 | 0.67291 | none |
| GPRIN2   | 0.012  | 0.0183  | 0.159  | 0.87693 | 0.926 | -6.56 | 0.28301 | none |

|          |        |         |        |         |       |       |         |      |
|----------|--------|---------|--------|---------|-------|-------|---------|------|
| ASNS     | 0.015  | -0.0743 | 0.1586 | 0.87728 | 0.927 | -6.56 | -0.1192 | none |
| MBD4     | -0.033 | 0.0889  | -0.158 | 0.87733 | 0.927 | -6.56 | 0.90779 | none |
| SRF      | 0.022  | 0.0881  | 0.1577 | 0.87793 | 0.927 | -6.56 | 0.65851 | none |
| LRIF1    | 0.02   | 0.0442  | 0.1574 | 0.87818 | 0.927 | -6.56 | 1.56579 | none |
| COL7A1   | -0.034 | #####   | -0.157 | 0.8783  | 0.927 | -6.56 | 1.49204 | none |
| MRRF     | 0.016  | -0.0308 | 0.1571 | 0.87837 | 0.927 | -6.56 | 1.55653 | none |
| TP53INP1 | 0.013  | -0.0755 | 0.1571 | 0.8784  | 0.927 | -6.56 | 0.47735 | none |
| ZNF438   | -0.02  | 0.0214  | -0.157 | 0.87846 | 0.927 | -6.56 | 1.55501 | none |
| DUSP10   | 0.019  | -0.0082 | 0.157  | 0.87847 | 0.927 | -6.56 | 0.01647 | none |
| TMLHE    | -0.034 | -0.046  | -0.157 | 0.87856 | 0.927 | -6.56 | 1.2342  | none |
| NEDD8-MI | 0.029  | -0.0409 | 0.1569 | 0.87857 | 0.927 | -6.56 | 1.16694 | none |
| USP17L24 | -0.011 | 0.006   | -0.157 | 0.87858 | 0.927 | -6.56 | 0       | none |
| USP17L25 | -0.011 | 0.006   | -0.157 | 0.87858 | 0.927 | -6.56 | 0       | none |
| USP17L26 | -0.011 | 0.006   | -0.157 | 0.87858 | 0.927 | -6.56 | 0       | none |
| ANKS6    | -0.028 | -0.0226 | -0.157 | 0.87876 | 0.927 | -6.56 | 0.88133 | none |
| SLC35C2  | 0.02   | -0.0232 | 0.1566 | 0.87879 | 0.927 | -6.56 | 1.27215 | none |
| TOR1AIP1 | 0.017  | 0.021   | 0.1566 | 0.87881 | 0.927 | -6.56 | 1.04004 | none |
| TTC30A   | -0.011 | -0.0061 | -0.157 | 0.87881 | 0.927 | -6.56 | -0.405  | none |
| SAV1     | -0.027 | -0.0714 | -0.156 | 0.87903 | 0.927 | -6.56 | 0.20789 | none |
| MECR     | 0.017  | 0.0685  | 0.1563 | 0.87904 | 0.927 | -6.56 | -0.117  | none |
| VN1R2    | 0.011  | 0.0263  | 0.1561 | 0.87916 | 0.927 | -6.56 | 1.14937 | none |
| CTRB2    | 0.018  | 0.012   | 0.1561 | 0.87916 | 0.927 | -6.56 | 1.09092 | none |
| NIPAL4   | 0.018  | 0.0297  | 0.1555 | 0.87961 | 0.928 | -6.56 | 1.41951 | none |
| FARSA    | -0.014 | 0.0272  | -0.155 | 0.87983 | 0.928 | -6.56 | 0.7266  | none |
| SETD3    | -0.016 | #####   | -0.155 | 0.88    | 0.928 | -6.56 | 1.20092 | none |
| FGL1     | -0.012 | -0.0168 | -0.155 | 0.88025 | 0.928 | -6.56 | 0.79704 | none |
| NEUROD6  | -0.011 | -0.0108 | -0.155 | 0.88037 | 0.928 | -6.56 | 0       | none |
| PTBP3    | 0.031  | -0.0259 | 0.1545 | 0.8804  | 0.928 | -6.56 | -0.1048 | none |
| C2ORF73  | -0.011 | -0.011  | -0.154 | 0.8808  | 0.929 | -6.56 | 0.50395 | none |
| AATF     | 0.033  | 0.1771  | 0.1539 | 0.88086 | 0.929 | -6.56 | 0.69669 | none |
| FAM104A  | 0.019  | 0.0158  | 0.1538 | 0.88096 | 0.929 | -6.56 | 0.39303 | none |
| SOBP     | 0.013  | 0.0342  | 0.1535 | 0.88117 | 0.929 | -6.56 | 0.90833 | none |
| VSTM2A   | -0.011 | 0.0075  | -0.153 | 0.88119 | 0.929 | -6.56 | 2.02628 | none |
| UBAC2    | 0.019  | -0.077  | 0.1535 | 0.88119 | 0.929 | -6.56 | 0.53957 | none |
| ASXL3    | 0.026  | 0.0173  | 0.1534 | 0.88124 | 0.929 | -6.56 | 0.57908 | none |
| WASF1    | -0.012 | 0.0384  | -0.153 | 0.88128 | 0.929 | -6.56 | 1.69507 | none |
| TLR9     | 0.027  | 0.0178  | 0.1533 | 0.88129 | 0.929 | -6.56 | 0.40344 | none |
| TMSB4Y   | 0.012  | 0.021   | 0.1532 | 0.88141 | 0.929 | -6.56 | 1.25684 | none |
| PTPN13   | 0.012  | 0.0279  | 0.1532 | 0.88143 | 0.929 | -6.56 | 1.24575 | none |
| GOLGA6L2 | 0.023  | 0.0431  | 0.1528 | 0.88171 | 0.929 | -6.56 | -0.8125 | none |

|           |        |         |        |         |       |       |         |      |
|-----------|--------|---------|--------|---------|-------|-------|---------|------|
| BCAT2     | 0.014  | 0.0201  | 0.1523 | 0.88209 | 0.929 | -6.56 | 1.24791 | none |
| OR2V1     | -0.01  | 0.0112  | -0.152 | 0.88237 | 0.93  | -6.56 | 0.71908 | none |
| AMACR     | 0.023  | -0.0024 | 0.1517 | 0.88254 | 0.93  | -6.56 | 0.99302 | none |
| NCAPH2    | 0.014  | 0.0337  | 0.1516 | 0.88263 | 0.93  | -6.56 | 0.02787 | none |
| RPP25L    | 0.023  | -0.0364 | 0.1511 | 0.88298 | 0.93  | -6.56 | 0.60194 | none |
| TUSC2     | -0.024 | -0.0296 | -0.151 | 0.88333 | 0.93  | -6.56 | 0.55846 | none |
| PDZD9     | 0.011  | 0.0107  | 0.1505 | 0.88346 | 0.93  | -6.56 | 1.06477 | none |
| MAP3K2    | 0.032  | 0.1536  | 0.1505 | 0.88348 | 0.93  | -6.56 | 0.47163 | none |
| UBTD2     | -0.015 | -0.0104 | -0.15  | 0.88405 | 0.931 | -6.56 | 0.81601 | none |
| SLC6A5    | 0.014  | 0.0134  | 0.1496 | 0.88414 | 0.931 | -6.56 | -0.3918 | none |
| SERPINE1  | 0.016  | 0.0345  | 0.1494 | 0.88432 | 0.931 | -6.56 | 0.82088 | none |
| CCNG2     | 0.019  | -0.1149 | 0.1494 | 0.88432 | 0.931 | -6.56 | -0.0026 | none |
| GNAO1     | -0.014 | -0.028  | -0.149 | 0.8847  | 0.931 | -6.56 | -0.5972 | none |
| FGF8      | 0.019  | -0.0397 | 0.1488 | 0.88474 | 0.931 | -6.56 | -0.1914 | none |
| CMTM8     | -0.031 | -0.0738 | -0.149 | 0.88482 | 0.931 | -6.56 | 0.72465 | none |
| PSMC1     | 0.019  | 0.0745  | 0.1484 | 0.88505 | 0.932 | -6.56 | -0.5467 | none |
| SGMS2     | 0.034  | 0.0621  | 0.1484 | 0.8851  | 0.932 | -6.56 | 0.38872 | none |
| HSPA12B   | 0.011  | 0.0158  | 0.1482 | 0.88523 | 0.932 | -6.56 | -0.0894 | none |
| HMMR      | 0.058  | 0.2509  | 0.1482 | 0.88523 | 0.932 | -6.56 | 0.73351 | none |
| AP3M2     | 0.022  | -0.0012 | 0.1481 | 0.88533 | 0.932 | -6.56 | 1.44776 | none |
| PLEKHA3   | 0.024  | -0.0665 | 0.1478 | 0.88551 | 0.932 | -6.56 | 0.98127 | none |
| EIF4EBP2  | -0.016 | -0.096  | -0.148 | 0.88551 | 0.932 | -6.56 | 0.17989 | none |
| APOLD1    | 0.022  | 0.0444  | 0.1478 | 0.88552 | 0.932 | -6.56 | 0.32536 | none |
| KRT24     | -0.011 | -0.0052 | -0.148 | 0.88554 | 0.932 | -6.56 | 0.5088  | none |
| HNRNPA2I1 | -0.024 | 0.0519  | -0.147 | 0.88618 | 0.932 | -6.56 | 1.09878 | none |
| SLC7A10   | 0.012  | 0.0116  | 0.1465 | 0.88656 | 0.933 | -6.56 | 0.81301 | none |
| CD59      | 0.015  | -0.0494 | 0.1464 | 0.88661 | 0.933 | -6.56 | -0.3546 | none |
| GGPS1     | 0.017  | -0.0646 | 0.1462 | 0.88675 | 0.933 | -6.56 | -0.1371 | none |
| RXFP4     | -0.013 | 0.0112  | -0.146 | 0.88696 | 0.933 | -6.56 | -0.1907 | none |
| DMRTB1    | 0.013  | 0.0129  | 0.1459 | 0.88701 | 0.933 | -6.56 | 0.48486 | none |
| ZDHHC3    | -0.01  | -0.0087 | -0.146 | 0.88708 | 0.933 | -6.56 | 0.38149 | none |
| ANKRA2    | -0.024 | -0.0889 | -0.146 | 0.88712 | 0.933 | -6.56 | 1.57933 | none |
| CD37      | 0.016  | -0.0544 | 0.1457 | 0.88719 | 0.933 | -6.56 | 1.03445 | none |
| NDRG4     | 0.038  | 0.0623  | 0.1452 | 0.88753 | 0.933 | -6.56 | 0.58092 | none |
| RNF144B   | 0.017  | 0.0457  | 0.1451 | 0.88762 | 0.933 | -6.56 | 1.34143 | none |
| VIPR2     | -0.019 | 0.0032  | -0.145 | 0.88767 | 0.933 | -6.56 | 0.83057 | none |
| CLDN20    | -0.015 | -0.0313 | -0.145 | 0.88793 | 0.933 | -6.56 | -0.5003 | none |
| YY1       | 0.029  | 0.1104  | 0.1447 | 0.88794 | 0.933 | -6.56 | 0.27906 | none |
| ANXA11    | 0.016  | 0.0388  | 0.1445 | 0.88805 | 0.933 | -6.56 | 1.03549 | none |
| C9ORF16   | -0.023 | -0.0493 | -0.144 | 0.8881  | 0.933 | -6.56 | 0.54191 | none |

|           |        |         |        |         |       |       |         |      |
|-----------|--------|---------|--------|---------|-------|-------|---------|------|
| MOB4      | -0.018 | -0.1102 | -0.144 | 0.88831 | 0.934 | -6.56 | 1.28042 | none |
| ATE1      | 0.025  | 0.0731  | 0.1442 | 0.88833 | 0.934 | -6.56 | 0.887   | none |
| FBN3      | -0.011 | 0.013   | -0.144 | 0.88847 | 0.934 | -6.56 | 0.77261 | none |
| ALPK2     | 0.011  | 0.0149  | 0.1439 | 0.88853 | 0.934 | -6.56 | 1.77976 | none |
| ESX1      | -0.014 | -0.0146 | -0.144 | 0.8886  | 0.934 | -6.56 | 1.31701 | none |
| NOTUM     | 0.023  | 0.0028  | 0.1437 | 0.88869 | 0.934 | -6.56 | 0.56429 | none |
| SERPINB1C | -0.019 | -0.0303 | -0.143 | 0.8889  | 0.934 | -6.56 | 0.71766 | none |
| AVPR2     | -0.029 | -0.0092 | -0.143 | 0.88902 | 0.934 | -6.56 | 0.57559 | none |
| TMEM39A   | -0.033 | -0.0522 | -0.143 | 0.88922 | 0.934 | -6.56 | 0.11341 | none |
| HOXB9     | -0.011 | #####   | -0.143 | 0.88952 | 0.934 | -6.56 | -0.105  | none |
| FCGR3A    | -0.01  | 0.003   | -0.143 | 0.88956 | 0.934 | -6.56 | 1.06743 | none |
| HNRNPCL1  | -0.013 | -0.0077 | -0.142 | 0.88963 | 0.934 | -6.56 | 1.9268  | none |
| SCN8A     | -0.019 | 0.0096  | -0.142 | 0.88972 | 0.934 | -6.56 | 1.93924 | none |
| MMEL1     | -0.054 | -0.021  | -0.142 | 0.88987 | 0.934 | -6.56 | -0.0314 | none |
| SCRIB     | 0.025  | 0.1754  | 0.1421 | 0.88989 | 0.934 | -6.56 | 0.04031 | none |
| TUBB2B    | -0.017 | -0.0449 | -0.142 | 0.89003 | 0.934 | -6.56 | 1.25041 | none |
| EIF4A2    | 0.016  | -0.0128 | 0.1418 | 0.89017 | 0.935 | -6.56 | 1.4336  | none |
| FAM171B   | -0.012 | -0.0052 | -0.142 | 0.89018 | 0.935 | -6.56 | 0.42157 | none |
| LRRC70    | -0.019 | 0.0212  | -0.142 | 0.89023 | 0.935 | -6.56 | 0.95656 | none |
| AMDHD1    | -0.041 | 0.0727  | -0.142 | 0.89038 | 0.935 | -6.56 | 0.71786 | none |
| EIF2B3    | 0.009  | -0.0082 | 0.1412 | 0.89062 | 0.935 | -6.56 | 0.18556 | none |
| AC090958  | -0.011 | -0.0149 | -0.141 | 0.89087 | 0.935 | -6.56 | 0.25989 | none |
| MMP14     | 0.036  | 0.1118  | 0.1406 | 0.89106 | 0.935 | -6.56 | 1.03341 | none |
| DR1       | 0.014  | -0.0305 | 0.1406 | 0.8911  | 0.935 | -6.56 | 1.67286 | none |
| CAMSAP3   | -0.035 | 0.0376  | -0.14  | 0.89171 | 0.936 | -6.56 | 0.61935 | none |
| NPTX1     | -0.015 | -0.0314 | -0.139 | 0.89193 | 0.936 | -6.56 | -0.5965 | none |
| IQSEC3    | 0.011  | 0.0375  | 0.1392 | 0.89214 | 0.936 | -6.56 | -0.4981 | none |
| STUB1     | -0.018 | -0.0262 | -0.139 | 0.89232 | 0.936 | -6.56 | 1.34197 | none |
| HOXB13    | -0.016 | 0.0217  | -0.139 | 0.8924  | 0.936 | -6.56 | 0.66617 | none |
| HOXD11    | -0.01  | -0.0097 | -0.139 | 0.89241 | 0.936 | -6.56 | -0.3453 | none |
| ZNF711    | 0.013  | 0.0129  | 0.1388 | 0.89248 | 0.936 | -6.56 | 0.6135  | none |
| ACO1      | 0.012  | 0.0454  | 0.1388 | 0.89249 | 0.936 | -6.56 | 1.22094 | none |
| GPR135    | -0.011 | 0.0232  | -0.139 | 0.8925  | 0.936 | -6.56 | -0.6047 | none |
| C9ORF43   | -0.012 | 0.0222  | -0.139 | 0.89259 | 0.936 | -6.56 | 1.38932 | none |
| GPSM1     | 0.021  | 0.0942  | 0.1384 | 0.89275 | 0.936 | -6.56 | 0.50867 | none |
| OR52L1    | -0.011 | -0.011  | -0.138 | 0.89289 | 0.936 | -6.56 | 0.63284 | none |
| ARL1      | 0.016  | -0.0457 | 0.1382 | 0.89292 | 0.936 | -6.56 | 0.70659 | none |
| TCF15     | 0.01   | 0.0073  | 0.1378 | 0.89323 | 0.937 | -6.56 | 0.32807 | none |
| PCYT2     | 0.011  | 0.0168  | 0.1375 | 0.89347 | 0.937 | -6.56 | -0.5164 | none |
| ADAM21    | 0.011  | -0.0106 | 0.1374 | 0.89354 | 0.937 | -6.56 | 0.71529 | none |

|           |        |         |        |         |       |       |         |      |
|-----------|--------|---------|--------|---------|-------|-------|---------|------|
| FSTL3     | 0.022  | -0.0651 | 0.137  | 0.89381 | 0.937 | -6.56 | 0.1943  | none |
| SYNM      | -0.01  | -0.0227 | -0.137 | 0.89384 | 0.937 | -6.56 | 0.39084 | none |
| PPP2R5D   | 0.026  | 0.1334  | 0.1368 | 0.894   | 0.937 | -6.56 | 0.90782 | none |
| RCHY1     | 0.025  | -0.0631 | 0.1368 | 0.89403 | 0.937 | -6.56 | 1.25478 | none |
| SLCO6A1   | 0.019  | 0.0192  | 0.1367 | 0.89405 | 0.937 | -6.56 | 1.69849 | none |
| DNASE1L1  | -0.032 | -0.0903 | -0.136 | 0.89446 | 0.937 | -6.56 | 0.44678 | none |
| VSX1      | -0.01  | 0.0147  | -0.136 | 0.8945  | 0.937 | -6.56 | 0.53086 | none |
| GPX7      | -0.013 | -0.0407 | -0.136 | 0.89451 | 0.937 | -6.56 | 0.88195 | none |
| HNRNPM    | 0.024  | 0.1218  | 0.1361 | 0.89455 | 0.937 | -6.56 | 0.3978  | none |
| HIST2H2BI | 0.011  | -0.035  | 0.1361 | 0.89458 | 0.937 | -6.56 | -0.1944 | none |
| ZBTB45    | 0.017  | 0.0259  | 0.136  | 0.89464 | 0.937 | -6.56 | 1.42043 | none |
| C7ORF50   | -0.017 | -0.056  | -0.136 | 0.89472 | 0.937 | -6.56 | 0.64592 | none |
| PGP       | 0.022  | 0.0347  | 0.1358 | 0.89474 | 0.937 | -6.56 | 1.01025 | none |
| TMEM259   | -0.021 | 0.0045  | -0.136 | 0.89477 | 0.937 | -6.56 | 0.07661 | none |
| DHCR7     | 0.02   | 0.0711  | 0.1357 | 0.89483 | 0.937 | -6.56 | 0.82112 | none |
| TMBIM1    | -0.019 | -0.079  | -0.136 | 0.8949  | 0.937 | -6.56 | -0.3384 | none |
| IRS4      | 0.009  | 0.0177  | 0.135  | 0.89535 | 0.938 | -6.56 | 0       | none |
| CRY1      | 0.014  | 0.0075  | 0.1345 | 0.89577 | 0.938 | -6.56 | 0.96333 | none |
| OR4N2     | 0.02   | 0.0254  | 0.1344 | 0.89582 | 0.938 | -6.56 | 0.28641 | none |
| KIFC3     | 0.038  | 0.1747  | 0.1343 | 0.89594 | 0.938 | -6.56 | 0.59744 | none |
| LTB4R     | -0.017 | 0.0109  | -0.134 | 0.89597 | 0.938 | -6.56 | 1.09999 | none |
| NDC1      | -0.025 | -0.0692 | -0.134 | 0.89601 | 0.938 | -6.56 | 0.10732 | none |
| TNFRSF14  | -0.015 | -0.0539 | -0.134 | 0.89608 | 0.938 | -6.56 | 0.98228 | none |
| MCRIP1    | -0.022 | -0.0622 | -0.134 | 0.89647 | 0.938 | -6.56 | 0.34152 | none |
| TMEM31    | -0.014 | 0.0111  | -0.133 | 0.89659 | 0.939 | -6.56 | 0.21054 | none |
| IFIT2     | -0.011 | -0.0109 | -0.133 | 0.89669 | 0.939 | -6.56 | 0.39861 | none |
| SUPT7L    | -0.018 | -0.0283 | -0.133 | 0.89672 | 0.939 | -6.56 | 0.11645 | none |
| MASP1     | 0.019  | -0.0458 | 0.1332 | 0.89678 | 0.939 | -6.56 | -0.1001 | none |
| TSPAN16   | -0.01  | 0.0062  | -0.133 | 0.89709 | 0.939 | -6.56 | 0.23067 | none |
| HNRNPH3   | -0.019 | 0.0317  | -0.132 | 0.89739 | 0.939 | -6.56 | 1.28323 | none |
| MYLIP     | 0.013  | 0.0176  | 0.1323 | 0.89744 | 0.939 | -6.56 | 0.09493 | none |
| TGFBR2    | -0.018 | 0.0483  | -0.132 | 0.89744 | 0.939 | -6.56 | 1.05045 | none |
| SYT3      | -0.021 | -0.0318 | -0.132 | 0.89745 | 0.939 | -6.56 | 1.45327 | none |
| YTHDF1    | -0.017 | 0.0505  | -0.132 | 0.89754 | 0.939 | -6.56 | 0.37855 | none |
| ZBTB22    | 0.018  | 0.0145  | 0.1321 | 0.89758 | 0.939 | -6.56 | 0.03646 | none |
| FCRL6     | -0.018 | -0.0321 | -0.132 | 0.89784 | 0.939 | -6.56 | 0.01552 | none |
| RPP21     | -0.044 | -0.1423 | -0.132 | 0.898   | 0.939 | -6.56 | 0.88592 | none |
| MEF2B     | -0.025 | 0.0109  | -0.131 | 0.8981  | 0.939 | -6.56 | 0.68009 | none |
| C9ORF152  | -0.01  | -0.0048 | -0.131 | 0.89813 | 0.939 | -6.56 | 0.90419 | none |
| NDRG1     | -0.013 | 0.0819  | -0.131 | 0.89815 | 0.939 | -6.56 | 0.76351 | none |

|          |        |         |        |         |       |       |         |      |
|----------|--------|---------|--------|---------|-------|-------|---------|------|
| FOXG1    | 0.037  | 0.0359  | 0.1314 | 0.89819 | 0.939 | -6.56 | 0.6081  | none |
| IQCK     | -0.019 | -0.1202 | -0.131 | 0.89876 | 0.94  | -6.56 | -0.0292 | none |
| UNC13B   | 0.023  | 0.0779  | 0.1304 | 0.8989  | 0.94  | -6.56 | 0.87817 | none |
| FABP3    | 0.017  | 0.0703  | 0.1303 | 0.89899 | 0.94  | -6.56 | 1.92109 | none |
| IFFO2    | 0.024  | 0.0774  | 0.1301 | 0.89913 | 0.94  | -6.56 | 1.24341 | none |
| HTR2B    | -0.014 | -0.0546 | -0.13  | 0.89924 | 0.94  | -6.56 | 1.09061 | none |
| HSD11B2  | 0.03   | 0.019   | 0.1299 | 0.89929 | 0.94  | -6.56 | -0.0328 | none |
| FGF1     | 0.016  | 0.0061  | 0.1299 | 0.89931 | 0.94  | -6.56 | -0.5113 | none |
| SLC22A10 | -0.01  | -0.0099 | -0.13  | 0.8996  | 0.94  | -6.56 | 0       | none |
| ST3GAL4  | 0.019  | 0.0532  | 0.1294 | 0.89968 | 0.94  | -6.56 | 0.78761 | none |
| HOXA10   | -0.02  | -0.0049 | -0.129 | 0.89978 | 0.94  | -6.56 | -0.2024 | none |
| SHANK2   | 0.043  | 0.0081  | 0.1291 | 0.89994 | 0.94  | -6.56 | 0.88465 | none |
| REP15    | 0.011  | 0.0528  | 0.1291 | 0.89995 | 0.94  | -6.56 | 1.11564 | none |
| PFKFB1   | 0.014  | 0.0405  | 0.1289 | 0.9001  | 0.941 | -6.56 | 0.84689 | none |
| ARHGAP3  | -0.021 | 0.02    | -0.129 | 0.90016 | 0.941 | -6.56 | 0.6658  | none |
| GLT1D1   | -0.013 | -0.009  | -0.129 | 0.90032 | 0.941 | -6.56 | -0.3491 | none |
| FBXL7    | 0.009  | 0.0196  | 0.1284 | 0.9005  | 0.941 | -6.56 | 0       | none |
| NECTIN1  | 0.029  | 0.0751  | 0.1282 | 0.90059 | 0.941 | -6.56 | 0.70159 | none |
| MAN2A1   | 0.018  | 0.0398  | 0.1279 | 0.90086 | 0.941 | -6.56 | 0.67823 | none |
| ADGRL2   | -0.009 | 0.0113  | -0.128 | 0.90111 | 0.941 | -6.56 | -0.7104 | none |
| SCP2     | -0.018 | -0.1035 | -0.127 | 0.90117 | 0.941 | -6.56 | 0.73472 | none |
| TDG      | 0.014  | -0.0247 | 0.1273 | 0.90134 | 0.941 | -6.56 | 0.58816 | none |
| C15ORF39 | 0.014  | 0.072   | 0.1272 | 0.90139 | 0.941 | -6.56 | 0.56188 | none |
| ABLIM2   | 0.018  | 0.0568  | 0.1268 | 0.90173 | 0.942 | -6.56 | -0.0625 | none |
| ARMC4    | -0.018 | 0.0423  | -0.126 | 0.90201 | 0.942 | -6.56 | 1.28512 | none |
| JSRP1    | -0.023 | -0.0574 | -0.126 | 0.90203 | 0.942 | -6.56 | 1.61748 | none |
| CARD19   | -0.02  | -0.0513 | -0.126 | 0.90243 | 0.942 | -6.56 | 0.86827 | none |
| PRKAB2   | -0.019 | 0.0642  | -0.126 | 0.90246 | 0.942 | -6.56 | 0.92252 | none |
| SIX1     | -0.021 | 0.0137  | -0.126 | 0.90253 | 0.942 | -6.56 | -0.2321 | none |
| PRAMEF1  | -0.009 | 0.0088  | -0.126 | 0.90268 | 0.942 | -6.56 | -0.4924 | none |
| FUOM     | -0.022 | -0.0469 | -0.126 | 0.90269 | 0.942 | -6.56 | -0.1472 | none |
| SKI      | 0.036  | 0.2211  | 0.1253 | 0.90287 | 0.942 | -6.56 | 0.53236 | none |
| EFNA2    | 0.01   | 0.0293  | 0.1253 | 0.90287 | 0.942 | -6.56 | 0.70347 | none |
| FAM163B  | 0.016  | 0.0155  | 0.1251 | 0.90298 | 0.942 | -6.56 | 0.37706 | none |
| HIST1H2A | -0.023 | -0.0708 | -0.125 | 0.90304 | 0.942 | -6.56 | 0.17261 | none |
| SNAI1    | -0.012 | #####   | -0.125 | 0.90316 | 0.942 | -6.56 | 0.45956 | none |
| ATAD1    | -0.014 | -0.1049 | -0.125 | 0.90335 | 0.943 | -6.56 | 1.23016 | none |
| DAB2IP   | -0.019 | -0.0129 | -0.124 | 0.90371 | 0.943 | -6.56 | 0.61822 | none |
| SYNPR    | 0.012  | 0.0414  | 0.1241 | 0.90375 | 0.943 | -6.56 | -0.5576 | none |
| C1ORF112 | -0.019 | -0.0708 | -0.124 | 0.90375 | 0.943 | -6.56 | 0.66292 | none |



|          |        |         |        |         |       |       |         |      |
|----------|--------|---------|--------|---------|-------|-------|---------|------|
| POU2F1   | 0.018  | 0.0637  | 0.1236 | 0.90417 | 0.943 | -6.56 | -0.0991 | none |
| KCNK5    | -0.015 | 0.0927  | -0.123 | 0.90427 | 0.943 | -6.56 | -0.0408 | none |
| ZC2HC1C  | 0.031  | 0.1007  | 0.1233 | 0.9044  | 0.943 | -6.57 | -0.3371 | none |
| DCLRE1A  | -0.015 | 0.0496  | -0.123 | 0.9044  | 0.943 | -6.57 | 0.12474 | none |
| SLC36A4  | 0.022  | -0.1057 | 0.1225 | 0.90499 | 0.944 | -6.57 | 1.35146 | none |
| PAM16    | 0.036  | -0.0572 | 0.1225 | 0.90501 | 0.944 | -6.57 | 0.90952 | none |
| TMIGD1   | 0.009  | 0.0194  | 0.122  | 0.90537 | 0.944 | -6.57 | 1.6907  | none |
| SALL2    | -0.012 | 0.0344  | -0.122 | 0.90538 | 0.944 | -6.57 | 0.75759 | none |
| NUDC     | -0.017 | 0.0835  | -0.122 | 0.90568 | 0.944 | -6.57 | 0.12798 | none |
| LBP      | -0.009 | 0.0201  | -0.122 | 0.9057  | 0.944 | -6.57 | 1.06325 | none |
| GAP43    | -0.01  | -0.0066 | -0.122 | 0.90571 | 0.944 | -6.57 | 0.45885 | none |
| B3GNT9   | -0.011 | -0.0089 | -0.121 | 0.90593 | 0.944 | -6.57 | 0.70296 | none |
| GPR180   | -0.012 | -0.06   | -0.121 | 0.90622 | 0.945 | -6.57 | 0.42243 | none |
| ELOF1    | 0.015  | -0.0599 | 0.1209 | 0.90623 | 0.945 | -6.57 | 0.44602 | none |
| LPCAT2   | -0.02  | -0.162  | -0.121 | 0.90631 | 0.945 | -6.57 | -0.6776 | none |
| CDKN2A   | 0.015  | -0.0387 | 0.1206 | 0.9065  | 0.945 | -6.57 | 0.55055 | none |
| SLC45A4  | -0.016 | 0.0405  | -0.121 | 0.90653 | 0.945 | -6.57 | 0.40541 | none |
| SH3GL3   | 0.02   | 0.0033  | 0.1205 | 0.90655 | 0.945 | -6.57 | 0.52554 | none |
| SMIM10L1 | -0.015 | 0.0582  | -0.12  | 0.9066  | 0.945 | -6.57 | 1.75159 | none |
| ACSL5    | 0.01   | -0.0431 | 0.1202 | 0.90679 | 0.945 | -6.57 | 0.77856 | none |
| RABEP1   | -0.013 | 0.115   | -0.12  | 0.9071  | 0.945 | -6.57 | 1.0376  | none |
| GAGE2E   | -0.02  | -0.025  | -0.12  | 0.90717 | 0.945 | -6.57 | -0.5568 | none |
| MTURN    | -0.016 | -0.0585 | -0.12  | 0.90727 | 0.945 | -6.57 | 0.74324 | none |
| DICER1   | 0.027  | 0.1607  | 0.1194 | 0.9074  | 0.945 | -6.57 | 0.57762 | none |
| AK6      | 0.013  | -0.0562 | 0.1194 | 0.90741 | 0.945 | -6.57 | 0.47857 | none |
| FAM90A1  | -0.012 | -0.0152 | -0.119 | 0.90746 | 0.945 | -6.57 | 0.95781 | none |
| CCNC     | -0.016 | -0.1325 | -0.119 | 0.90758 | 0.945 | -6.57 | 0.85698 | none |
| OR6N1    | -0.016 | -0.0308 | -0.119 | 0.90758 | 0.945 | -6.57 | 0.43091 | none |
| GAS1     | 0.009  | 0.0067  | 0.1191 | 0.90764 | 0.945 | -6.57 | 0       | none |
| VPS72    | 0.014  | -0.0454 | 0.1191 | 0.90765 | 0.945 | -6.57 | 0.34445 | none |
| C17ORF98 | 0.011  | -0.0082 | 0.1189 | 0.90777 | 0.945 | -6.57 | 1.51499 | none |
| TAF7     | 0.016  | -0.0102 | 0.1188 | 0.90787 | 0.945 | -6.57 | 0.92762 | none |
| ALOXE3   | -0.009 | #####   | -0.119 | 0.90798 | 0.945 | -6.57 | 0.01161 | none |
| OR2C3    | 0.008  | 0.0139  | 0.1181 | 0.90841 | 0.946 | -6.57 | -0.6989 | none |
| AGXT2    | 0.01   | 0.0289  | 0.1181 | 0.90843 | 0.946 | -6.57 | 0.83572 | none |
| ACTG1    | -0.016 | -0.1097 | -0.118 | 0.90845 | 0.946 | -6.57 | 1.14398 | none |
| ISG20    | 0.026  | -0.0762 | 0.1176 | 0.90883 | 0.946 | -6.57 | 0.75734 | none |
| TACR1    | 0.017  | 0.0316  | 0.1173 | 0.909   | 0.946 | -6.57 | 1.06981 | none |
| HIRA     | 0.023  | 0.1387  | 0.1171 | 0.90914 | 0.946 | -6.57 | -0.006  | none |
| SLC6A3   | 0.008  | 0.0087  | 0.1171 | 0.9092  | 0.946 | -6.57 | -0.0239 | none |

|          |        |         |        |         |       |       |         |      |
|----------|--------|---------|--------|---------|-------|-------|---------|------|
| F2       | 0.013  | 0.0386  | 0.1169 | 0.9093  | 0.946 | -6.57 | 1.41052 | none |
| MTIF3    | -0.022 | -0.0543 | -0.117 | 0.90955 | 0.946 | -6.57 | 1.63402 | none |
| SUCO     | 0.021  | 0.0553  | 0.1162 | 0.90985 | 0.947 | -6.57 | 0.83249 | none |
| YY2      | -0.01  | 0.0249  | -0.116 | 0.90989 | 0.947 | -6.57 | 0.64892 | none |
| IFI44    | -0.022 | -0.1635 | -0.116 | 0.90994 | 0.947 | -6.57 | -0.0449 | none |
| FBLL1    | -0.01  | 0.0062  | -0.116 | 0.91005 | 0.947 | -6.57 | 0.76875 | none |
| SLC6A20  | 0.018  | -0.0248 | 0.1157 | 0.91023 | 0.947 | -6.57 | -0.2931 | none |
| DNAH12   | 0.008  | 0.0024  | 0.1151 | 0.91071 | 0.947 | -6.57 | -0.3032 | none |
| ARMC5    | -0.01  | 0.0037  | -0.114 | 0.91127 | 0.948 | -6.57 | 0.12166 | none |
| PIM1     | -0.015 | -0.047  | -0.113 | 0.91198 | 0.948 | -6.57 | 1.64221 | none |
| FZD9     | 0.008  | 0.0248  | 0.1131 | 0.91227 | 0.949 | -6.57 | -0.1081 | none |
| SKOR1    | -0.008 | 0.0063  | -0.113 | 0.91232 | 0.949 | -6.57 | 0.02754 | none |
| DDIT4L   | 0.017  | 0.0272  | 0.1129 | 0.91241 | 0.949 | -6.57 | 1.36465 | none |
| C1ORF198 | 0.018  | 0.1217  | 0.1127 | 0.91258 | 0.949 | -6.57 | 0.92593 | none |
| IL10RB   | 0.013  | -0.1146 | 0.1127 | 0.91259 | 0.949 | -6.57 | 0.45796 | none |
| PIK3CG   | -0.021 | -0.0183 | -0.113 | 0.91262 | 0.949 | -6.57 | 0.81814 | none |
| CYP26A1  | 0.008  | 0.0332  | 0.1123 | 0.91289 | 0.949 | -6.57 | -0.5039 | none |
| NCAPG2   | 0.016  | 0.0974  | 0.1123 | 0.91292 | 0.949 | -6.57 | 0.29335 | none |
| PFN2     | 0.029  | 0.0151  | 0.1122 | 0.91295 | 0.949 | -6.57 | 1.05498 | none |
| C2CD4D   | 0.015  | 0.0912  | 0.1122 | 0.91296 | 0.949 | -6.57 | 0.36514 | none |
| MPP7     | 0.023  | -0.0262 | 0.112  | 0.91311 | 0.949 | -6.57 | -0.0074 | none |
| LRRN1    | -0.009 | 0.0266  | -0.112 | 0.91335 | 0.949 | -6.57 | -0.2868 | none |
| SPINK5   | -0.011 | 0.0163  | -0.111 | 0.91362 | 0.949 | -6.57 | 0.62207 | none |
| RASAL3   | 0.021  | 0.1565  | 0.1113 | 0.91364 | 0.949 | -6.57 | 1.02154 | none |
| TLE3     | 0.022  | 0.1451  | 0.111  | 0.91391 | 0.95  | -6.57 | 0.02218 | none |
| UROC1    | 0.009  | 0.0082  | 0.111  | 0.91393 | 0.95  | -6.57 | 1.25704 | none |
| C16ORF71 | -0.014 | -0.0017 | -0.111 | 0.91413 | 0.95  | -6.57 | -0.0855 | none |
| CAP1     | 0.014  | 0.0545  | 0.11   | 0.91463 | 0.95  | -6.57 | 0.82198 | none |
| SH2D7    | 0.007  | 0.0166  | 0.1099 | 0.91474 | 0.95  | -6.57 | -0.5635 | none |
| UBE2G1   | 0.015  | 0.0083  | 0.1096 | 0.91494 | 0.95  | -6.57 | 0.82248 | none |
| GLYCTK   | 0.019  | 0.0569  | 0.1094 | 0.91511 | 0.95  | -6.57 | 1.24332 | none |
| IFIT1    | 0.008  | -0.0064 | 0.1094 | 0.91513 | 0.95  | -6.57 | 0.04988 | none |
| CHIC1    | 0.025  | 0.0031  | 0.1093 | 0.91522 | 0.95  | -6.57 | 1.39798 | none |
| ARFIP2   | 0.011  | 0.0119  | 0.1093 | 0.91524 | 0.95  | -6.57 | 1.62782 | none |
| DDTL     | -0.023 | 0.1093  | -0.109 | 0.91533 | 0.95  | -6.57 | 0.8292  | none |
| LYSMD1   | 0.01   | 0.0563  | 0.1091 | 0.91539 | 0.95  | -6.57 | 1.22506 | none |
| OR1L4    | 0.012  | 0.0118  | 0.1087 | 0.91564 | 0.951 | -6.57 | 1.60326 | none |
| CASQ2    | -0.036 | -0.1091 | -0.109 | 0.91577 | 0.951 | -6.57 | -0.5171 | none |
| WHRN     | -0.014 | 0.0908  | -0.108 | 0.91602 | 0.951 | -6.57 | 0.36337 | none |
| ARG1     | -0.012 | -0.0622 | -0.108 | 0.91653 | 0.951 | -6.57 | 1.39761 | none |

|          |        |         |        |         |       |       |         |            |
|----------|--------|---------|--------|---------|-------|-------|---------|------------|
| NFKBIE   | -0.014 | -0.0077 | -0.107 | 0.91665 | 0.952 | -6.57 | 0.44923 | none       |
| PICALM   | -0.026 | #####   | -0.107 | 0.91676 | 0.952 | -6.57 | 0.88605 | none       |
| PHACTR3  | 0.009  | 0.0094  | 0.1073 | 0.91679 | 0.952 | -6.57 | 1.26592 | none       |
| LSP1     | 0.014  | 0.0852  | 0.107  | 0.91701 | 0.952 | -6.57 | 1.10975 | none       |
| NR1D2    | -0.018 | -0.0543 | -0.107 | 0.9172  | 0.952 | -6.57 | 0.80843 | none       |
| AWAT2    | 0.009  | 0.0273  | 0.1063 | 0.91754 | 0.952 | -6.57 | 0.76342 | none       |
| TSPAN7   | -0.026 | -0.0339 | -0.106 | 0.91758 | 0.952 | -6.57 | 0.2852  | none       |
| ZNF185   | -0.008 | 0.0229  | -0.106 | 0.91768 | 0.952 | -6.57 | 2.01189 | none       |
| ARHGEF7  | 0.03   | 0.203   | 0.1061 | 0.9177  | 0.952 | -6.57 | 0.31661 | none       |
| GOLPH3   | -0.013 | 0.0012  | -0.106 | 0.91798 | 0.952 | -6.57 | 1.0798  | none       |
| CROCC2   | 0.011  | -0.0137 | 0.1056 | 0.91805 | 0.952 | -6.57 | 0.87021 | none       |
| FAM171A: | 0.011  | 0.0865  | 0.1056 | 0.91807 | 0.952 | -6.57 | 0.8858  | none       |
| PSMD3    | 0.011  | 0.0635  | 0.1053 | 0.91833 | 0.952 | -6.57 | 1.34226 | none       |
| LRRC46   | 0.011  | 0.0844  | 0.1052 | 0.91834 | 0.952 | -6.57 | 1.24564 | none       |
| KRTAP5-9 | 0.01   | 0.041   | 0.1051 | 0.91844 | 0.952 | -6.57 | 0.9557  | none       |
| KDSR     | -0.018 | -0.0279 | -0.105 | 0.91847 | 0.952 | -6.57 | 1.04343 | none       |
| RNF32    | 0.015  | 0.0383  | 0.105  | 0.91849 | 0.952 | -6.57 | 0.09668 | none       |
| MPV17L2  | -0.012 | -0.0143 | -0.105 | 0.91853 | 0.952 | -6.57 | 0.26673 | none       |
| PIAS3    | 0.013  | 0.0674  | 0.1049 | 0.91859 | 0.952 | -6.57 | 1.22853 | none       |
| TARM1    | -0.018 | 0.0329  | -0.105 | 0.91863 | 0.952 | -6.57 | -0.1245 | none       |
| TXNDC5   | -0.021 | -0.0677 | -0.105 | 0.91867 | 0.952 | -6.57 | -0.4828 | none       |
| UCK1     | 0.013  | 0.069   | 0.1048 | 0.91872 | 0.952 | -6.57 | -0.1657 | none       |
| ITIH4    | 0.028  | 0.0855  | 0.1047 | 0.91873 | 0.952 | -6.57 | 0.01908 | none       |
| ZCCHC9   | -0.016 | -0.0644 | -0.104 | 0.91893 | 0.953 | -6.57 | 0.94458 | none       |
| GPR75    | 0.014  | 0.0568  | 0.1043 | 0.91906 | 0.953 | -6.57 | 0.22877 | none       |
| ZFAND2B  | -0.011 | -0.031  | -0.104 | 0.91939 | 0.953 | -6.57 | -0.1098 | none       |
| DPP10    | -0.014 | 0.0047  | -0.104 | 0.9196  | 0.953 | -6.57 | 1.48707 | none       |
| PRADC1   | -0.016 | -0.1047 | -0.103 | 0.92007 | 0.953 | -6.57 | 0.37985 | none       |
| YWHAG    | 0.012  | 0.0149  | 0.1027 | 0.92033 | 0.954 | -6.57 | 1.47528 | none       |
| STAT5A   | 0.011  | 0.0951  | 0.1024 | 0.92051 | 0.954 | -6.57 | 1.16382 | none       |
| GMFB     | -0.018 | -0.1147 | -0.102 | 0.92051 | 0.954 | -6.57 | 0.65169 | none       |
| RAC3     | -0.025 | #####   | -0.102 | 0.92061 | 0.954 | -6.57 | 2.12653 | AA-related |
| AGTRAP   | 0.016  | -0.0478 | 0.1023 | 0.92061 | 0.954 | -6.57 | 0.54438 | none       |
| TICAM1   | 0.013  | 0.0895  | 0.1021 | 0.92074 | 0.954 | -6.57 | 1.09433 | none       |
| SCNN1B   | 0.013  | 0.0485  | 0.1021 | 0.92078 | 0.954 | -6.57 | 0.40291 | none       |
| SCG5     | -0.009 | 0.0443  | -0.102 | 0.92088 | 0.954 | -6.57 | 0.64017 | none       |
| IL17B    | 0.017  | 0.0679  | 0.1019 | 0.92091 | 0.954 | -6.57 | 0.02031 | none       |
| CPN1     | -0.011 | -0.0388 | -0.102 | 0.92106 | 0.954 | -6.57 | 0.04383 | none       |
| ABHD17A  | -0.019 | -0.1121 | -0.102 | 0.9212  | 0.954 | -6.57 | 0.28089 | none       |
| UBA2     | 0.009  | 0.0414  | 0.1015 | 0.92125 | 0.954 | -6.57 | -0.6354 | none       |

|         |        |         |        |         |       |       |         |      |
|---------|--------|---------|--------|---------|-------|-------|---------|------|
| NSL1    | -0.009 | -0.1014 | -0.101 | 0.92136 | 0.954 | -6.57 | 1.52178 | none |
| AKR1C3  | -0.018 | -0.0882 | -0.101 | 0.92159 | 0.954 | -6.57 | 0.25914 | none |
| MEX3A   | 0.008  | 0.0267  | 0.1008 | 0.92176 | 0.954 | -6.57 | -0.0533 | none |
| KRT75   | -0.007 | -0.0071 | -0.101 | 0.92196 | 0.954 | -6.57 | 0       | none |
| ZCCHC14 | -0.018 | 0.1307  | -0.1   | 0.92212 | 0.955 | -6.57 | 0.71338 | none |
| DCUN1D1 | -0.007 | -0.0549 | -0.1   | 0.92224 | 0.955 | -6.57 | 0.14977 | none |
| FAM166A | -0.01  | -0.0029 | -0.1   | 0.92235 | 0.955 | -6.57 | 0.39365 | none |
| ZCCHC12 | -0.008 | 0.028   | -0.1   | 0.92244 | 0.955 | -6.57 | 0.03917 | none |
| FRAS1   | -0.007 | 0.0027  | -0.1   | 0.92269 | 0.955 | -6.57 | -0.6442 | none |
| GOLGA5  | -0.023 | 0.0892  | -0.1   | 0.92271 | 0.955 | -6.57 | 0.82353 | none |
| MAPT    | -0.008 | 0.0079  | -0.1   | 0.92274 | 0.955 | -6.57 | -0.2231 | none |
| WDR49   | 0.007  | -0.0091 | 0.0989 | 0.92323 | 0.955 | -6.57 | 0.30003 | none |
| PYGO2   | -0.008 | -0.0164 | -0.099 | 0.92352 | 0.956 | -6.57 | 1.73673 | none |
| UBXN10  | -0.007 | 0.0137  | -0.099 | 0.92354 | 0.956 | -6.57 | 0.31413 | none |
| CMTM1   | 0.025  | 0.1211  | 0.0984 | 0.92367 | 0.956 | -6.57 | 0.02104 | none |
| LSMEM2  | 0.007  | 0.0169  | 0.0982 | 0.92381 | 0.956 | -6.57 | 1.17577 | none |
| VEPH1   | 0.022  | #####   | 0.0976 | 0.92424 | 0.956 | -6.57 | 1.24006 | none |
| MAMDC2  | -0.009 | -0.0114 | -0.097 | 0.92434 | 0.956 | -6.57 | -0.2612 | none |
| SMKR1   | -0.023 | -0.0719 | -0.097 | 0.92435 | 0.956 | -6.57 | 1.59354 | none |
| ZNF462  | -0.008 | -0.0126 | -0.097 | 0.92452 | 0.956 | -6.57 | 0.18109 | none |
| ITGA7   | 0.024  | 0.0659  | 0.097  | 0.92468 | 0.956 | -6.57 | 0.08437 | none |
| SH3D19  | -0.018 | -0.0503 | -0.097 | 0.9247  | 0.956 | -6.57 | 0.17167 | none |
| SLC29A1 | -0.012 | 0.0236  | -0.097 | 0.92503 | 0.957 | -6.57 | 0.4543  | none |
| RSPH14  | 0.012  | 0.0977  | 0.0964 | 0.92519 | 0.957 | -6.57 | 0.13261 | none |
| ADSS    | 0.009  | -0.0063 | 0.0961 | 0.92541 | 0.957 | -6.57 | 1.76384 | none |
| PRSS12  | 0.008  | 0.0151  | 0.0961 | 0.92542 | 0.957 | -6.57 | 0.27288 | none |
| GPR25   | -0.013 | 0.0266  | -0.096 | 0.92543 | 0.957 | -6.57 | 0.13987 | none |
| TEC     | -0.018 | -0.0327 | -0.096 | 0.92548 | 0.957 | -6.57 | 0.44983 | none |
| TCEAL1  | -0.015 | -0.1122 | -0.096 | 0.9256  | 0.957 | -6.57 | -0.0309 | none |
| PURA    | 0.016  | 0.0331  | 0.0958 | 0.92565 | 0.957 | -6.57 | 0.51329 | none |
| ECM1    | -0.016 | -0.0737 | -0.096 | 0.92571 | 0.957 | -6.57 | -0.2028 | none |
| ABCB6   | 0.01   | -0.0573 | 0.0953 | 0.92599 | 0.957 | -6.57 | 0.68802 | none |
| MN1     | -0.007 | -0.0148 | -0.095 | 0.92628 | 0.957 | -6.57 | 1.60331 | none |
| FAM19A2 | -0.03  | -0.0797 | -0.095 | 0.92633 | 0.957 | -6.57 | 0.55411 | none |
| TRAPPC9 | 0.013  | 0.1435  | 0.0946 | 0.92657 | 0.957 | -6.57 | 0.40108 | none |
| RORA    | 0.012  | 0.005   | 0.0944 | 0.92675 | 0.958 | -6.57 | 1.24983 | none |
| PTPN6   | 0.013  | 0.1122  | 0.0941 | 0.92693 | 0.958 | -6.57 | 0.4295  | none |
| MS4A15  | 0.007  | 0.0041  | 0.0936 | 0.92734 | 0.958 | -6.57 | 0.21746 | none |
| YBX1    | 0.019  | 0.1379  | 0.0929 | 0.92791 | 0.959 | -6.57 | -0.2035 | none |
| MAPK13  | -0.009 | -0.0132 | -0.093 | 0.92792 | 0.959 | -6.57 | 0.82661 | none |

|          |        |         |        |         |       |       |         |      |
|----------|--------|---------|--------|---------|-------|-------|---------|------|
| KLHDC7B  | 0.012  | 0.0237  | 0.0926 | 0.92808 | 0.959 | -6.57 | 1.61191 | none |
| THAP3    | -0.015 | 0.0135  | -0.092 | 0.92834 | 0.959 | -6.57 | 1.12104 | none |
| CDK3     | -0.014 | 0.0557  | -0.092 | 0.92843 | 0.959 | -6.57 | 1.19668 | none |
| TRABD    | 0.009  | -0.0131 | 0.092  | 0.92854 | 0.959 | -6.57 | 1.62948 | none |
| MTA2     | 0.018  | 0.0977  | 0.0918 | 0.92876 | 0.959 | -6.57 | 1.13287 | none |
| NCAM1    | -0.018 | 0.0775  | -0.092 | 0.92896 | 0.959 | -6.57 | -0.4201 | none |
| CELSR2   | -0.008 | 0.0248  | -0.091 | 0.929   | 0.959 | -6.57 | 1.33733 | none |
| POLR2E   | 0.012  | 0.045   | 0.0912 | 0.92922 | 0.959 | -6.57 | -0.4423 | none |
| SLC9A3R2 | 0.018  | 0.0059  | 0.091  | 0.92937 | 0.959 | -6.57 | 0.05395 | none |
| LRRC7    | -0.032 | 0.0508  | -0.091 | 0.9294  | 0.959 | -6.57 | 0.54869 | none |
| TBR1     | 0.006  | 0.0167  | 0.0906 | 0.92968 | 0.96  | -6.57 | 0.02522 | none |
| MEST     | -0.022 | -0.1428 | -0.09  | 0.92975 | 0.96  | -6.57 | 1.39642 | none |
| TIA1     | 0.013  | -0.05   | 0.0903 | 0.92992 | 0.96  | -6.57 | -0.1783 | none |
| ATP13A3  | 0.017  | 0.0736  | 0.0901 | 0.93007 | 0.96  | -6.57 | 0.3378  | none |
| KLK1     | -0.01  | -0.0199 | -0.09  | 0.93011 | 0.96  | -6.57 | 0.28496 | none |
| CTAGE8   | -0.008 | 0.0293  | -0.09  | 0.93015 | 0.96  | -6.57 | 0.36431 | none |
| KIAA1143 | 0.013  | 0.0501  | 0.0895 | 0.93053 | 0.96  | -6.57 | -0.5786 | none |
| RAD21L1  | -0.008 | 0.0227  | -0.089 | 0.93063 | 0.96  | -6.57 | -0.3399 | none |
| TSTD1    | 0.018  | -0.0654 | 0.089  | 0.93087 | 0.96  | -6.57 | 0.3694  | none |
| WASL     | 0.009  | 0.0183  | 0.0888 | 0.93107 | 0.96  | -6.57 | 0.92457 | none |
| RPS4Y1   | 0.014  | -0.1107 | 0.0887 | 0.93114 | 0.96  | -6.57 | 0.99107 | none |
| LYAR     | 0.02   | 0.1615  | 0.0887 | 0.93115 | 0.96  | -6.57 | 0.54848 | none |
| DNAJC8   | 0.012  | 0.0765  | 0.0887 | 0.93117 | 0.96  | -6.57 | -0.0666 | none |
| VIT      | -0.008 | 0.0171  | -0.089 | 0.93118 | 0.96  | -6.57 | -0.0843 | none |
| GPR84    | 0.009  | 0.011   | 0.0886 | 0.93119 | 0.96  | -6.57 | -0.201  | none |
| CCL4     | -0.014 | 0.0209  | -0.089 | 0.9312  | 0.96  | -6.57 | 0.50245 | none |
| MPND     | -0.027 | -0.0519 | -0.088 | 0.93142 | 0.961 | -6.57 | -0.6496 | none |
| CLDN24   | 0.007  | 0.0249  | 0.0882 | 0.93154 | 0.961 | -6.57 | 0.99228 | none |
| TMEM199  | 0.011  | -0.0455 | 0.088  | 0.93169 | 0.961 | -6.57 | 1.06063 | none |
| CPNE5    | 0.007  | 0.0027  | 0.0876 | 0.93197 | 0.961 | -6.57 | 0.06927 | none |
| TRMO     | 0.011  | -0.0461 | 0.0874 | 0.93215 | 0.961 | -6.57 | 1.30886 | none |
| LBH      | 0.01   | -0.0258 | 0.0874 | 0.93217 | 0.961 | -6.57 | 0.54016 | none |
| CNTNAP5  | 0.014  | 0.0193  | 0.0873 | 0.93223 | 0.961 | -6.57 | 1.13402 | none |
| ABCC5    | -0.011 | 0.0566  | -0.087 | 0.93227 | 0.961 | -6.57 | -0.2047 | none |
| SLC25A44 | -0.01  | -0.0206 | -0.087 | 0.93227 | 0.961 | -6.57 | 1.18399 | none |
| GABRR3   | 0.006  | -0.001  | 0.0871 | 0.93241 | 0.961 | -6.57 | 1.36185 | none |
| TRPA1    | -0.008 | 0.0132  | -0.087 | 0.93243 | 0.961 | -6.57 | 0.29617 | none |
| CHRM4    | 0.006  | 0.0216  | 0.087  | 0.93244 | 0.961 | -6.57 | -0.0767 | none |
| DPYS     | -0.013 | -0.0086 | -0.087 | 0.93255 | 0.961 | -6.57 | 0.82034 | none |
| MC5R     | -0.007 | 0.0141  | -0.087 | 0.93259 | 0.961 | -6.57 | 0.36216 | none |

|          |        |         |        |         |       |       |         |      |
|----------|--------|---------|--------|---------|-------|-------|---------|------|
| B3GNT2   | 0.013  | 0.0096  | 0.0865 | 0.9328  | 0.961 | -6.57 | 1.59649 | none |
| ZNF189   | -0.011 | 0.0337  | -0.087 | 0.93281 | 0.961 | -6.57 | 0.45885 | none |
| ZNF75D   | 0.014  | 0.0922  | 0.0865 | 0.93282 | 0.961 | -6.57 | 1.87537 | none |
| IGFL3    | 0.009  | 0.0424  | 0.0864 | 0.93288 | 0.961 | -6.57 | 1.23377 | none |
| ARR3     | 0.009  | -0.0132 | 0.0863 | 0.93303 | 0.961 | -6.57 | 1.00829 | none |
| SLAIN2   | -0.017 | 0.0657  | -0.086 | 0.93304 | 0.961 | -6.57 | 0.80921 | none |
| XPR1     | -0.013 | #####   | -0.086 | 0.93309 | 0.961 | -6.57 | 0.53146 | none |
| MFAP1    | -0.017 | 0.078   | -0.086 | 0.9331  | 0.961 | -6.57 | 0.96409 | none |
| FAM206A  | -0.012 | 0.0081  | -0.086 | 0.93328 | 0.961 | -6.57 | 0.00173 | none |
| CEACAM6  | 0.015  | 0.0061  | 0.0856 | 0.93351 | 0.961 | -6.57 | 1.45518 | none |
| CRACR2B  | 0.011  | -0.0142 | 0.0856 | 0.93354 | 0.961 | -6.57 | 1.21105 | none |
| SMN1     | 0.015  | 0.101   | 0.0855 | 0.93359 | 0.961 | -6.57 | 1.82907 | none |
| PTGS2    | 0.011  | 0.0331  | 0.0855 | 0.93361 | 0.961 | -6.57 | 1.15038 | none |
| WFDC5    | 0.009  | 0.0095  | 0.0855 | 0.93364 | 0.961 | -6.57 | 0.66722 | none |
| PPP1R1A  | -0.01  | -0.0074 | -0.085 | 0.93365 | 0.961 | -6.57 | 0.98675 | none |
| NFE2     | -0.009 | -0.0092 | -0.085 | 0.93374 | 0.961 | -6.57 | 0.7272  | none |
| ATOH7    | 0.009  | 0.0086  | 0.0848 | 0.93417 | 0.962 | -6.57 | -0.4546 | none |
| GABRA2   | -0.006 | 0.0037  | -0.084 | 0.93459 | 0.962 | -6.57 | -0.4209 | none |
| UNC5C    | 0.007  | 0.0111  | 0.0842 | 0.93464 | 0.962 | -6.57 | 1.26835 | none |
| MTOR     | 0.021  | 0.2079  | 0.084  | 0.93474 | 0.962 | -6.57 | 0.28918 | none |
| ITGAM    | 0.016  | -0.0397 | 0.0837 | 0.93497 | 0.962 | -6.57 | 0.09707 | none |
| RGS3     | 0.011  | 0.0601  | 0.0837 | 0.93498 | 0.962 | -6.57 | 1.18986 | none |
| GZMK     | -0.01  | -0.0211 | -0.084 | 0.93502 | 0.962 | -6.57 | 0.71141 | none |
| CFAP36   | -0.014 | -0.0346 | -0.083 | 0.93549 | 0.963 | -6.57 | 0.08153 | none |
| KBTBD4   | 0.007  | -0.0578 | 0.0829 | 0.93563 | 0.963 | -6.57 | 0.75971 | none |
| BHMG1    | 0.006  | 0.016   | 0.0828 | 0.93568 | 0.963 | -6.57 | 0.89996 | none |
| COLGALT2 | -0.006 | 0.0272  | -0.083 | 0.93576 | 0.963 | -6.57 | 0.07787 | none |
| MTAP     | 0.007  | 0.0267  | 0.0824 | 0.93601 | 0.963 | -6.57 | 0.77476 | none |
| LCMT1    | -0.017 | -0.1012 | -0.082 | 0.9361  | 0.963 | -6.57 | -0.1379 | none |
| FAM71B   | -0.006 | 0.0047  | -0.082 | 0.93634 | 0.963 | -6.57 | 0.73711 | none |
| TMEM62   | 0.012  | -0.0689 | 0.0817 | 0.93653 | 0.963 | -6.57 | 1.13506 | none |
| C16ORF92 | 0.02   | 0.0203  | 0.0811 | 0.93698 | 0.964 | -6.57 | -0.1693 | none |
| HLA-DQA1 | -0.014 | -0.0804 | -0.081 | 0.93704 | 0.964 | -6.57 | -0.509  | none |
| TNFSF4   | 0.007  | 0.0162  | 0.081  | 0.93712 | 0.964 | -6.57 | 0.39436 | none |
| MICA     | -0.015 | -0.1098 | -0.081 | 0.93722 | 0.964 | -6.57 | 0.00146 | none |
| PIEZO2   | -0.023 | 0.0833  | -0.081 | 0.93727 | 0.964 | -6.57 | 0.23563 | none |
| C5ORF30  | -0.016 | -0.0458 | -0.081 | 0.93748 | 0.964 | -6.57 | 0.8272  | none |
| PLSCR4   | 0.007  | 0.0255  | 0.0804 | 0.93754 | 0.964 | -6.57 | -0.669  | none |
| NEU2     | 0.006  | 0.0146  | 0.0803 | 0.93763 | 0.964 | -6.57 | -0.3711 | none |
| LTV1     | -0.019 | 0.1076  | -0.08  | 0.93781 | 0.964 | -6.57 | 1.11928 | none |

|          |        |         |        |         |       |       |         |      |
|----------|--------|---------|--------|---------|-------|-------|---------|------|
| MTX1     | 0.008  | -0.0137 | 0.0799 | 0.93794 | 0.964 | -6.57 | 0.21069 | none |
| PHRF1    | 0.025  | 0.2105  | 0.0799 | 0.93799 | 0.964 | -6.57 | 0.66121 | none |
| GPR34    | 0.01   | -0.0409 | 0.0797 | 0.93807 | 0.964 | -6.57 | 1.25025 | none |
| NPDC1    | 0.022  | -0.0034 | 0.0795 | 0.93828 | 0.964 | -6.57 | 0.48007 | none |
| TSTA3    | -0.009 | -0.0166 | -0.079 | 0.93865 | 0.965 | -6.57 | 1.58685 | none |
| NOMO1    | 0.021  | 0.1462  | 0.079  | 0.93868 | 0.965 | -6.57 | 0.25217 | none |
| SAMD11   | 0.006  | 0.0216  | 0.0789 | 0.93869 | 0.965 | -6.57 | -0.2607 | none |
| ALG1     | 0.009  | -0.0152 | 0.0789 | 0.93872 | 0.965 | -6.57 | -0.2914 | none |
| CCDC112  | 0.013  | -0.0048 | 0.0788 | 0.93882 | 0.965 | -6.57 | 1.43345 | none |
| COL4A3   | 0.007  | 0.0057  | 0.0784 | 0.93909 | 0.965 | -6.57 | -0.5368 | none |
| OR11H12  | -0.008 | 0.0238  | -0.078 | 0.93914 | 0.965 | -6.57 | 0.32805 | none |
| CPLX1    | 0.007  | -0.0044 | 0.0782 | 0.93927 | 0.965 | -6.57 | 1.15582 | none |
| NR2F6    | 0.016  | 0.0546  | 0.0782 | 0.93928 | 0.965 | -6.57 | 1.01099 | none |
| AC069499 | 0.022  | 0.1449  | 0.0778 | 0.93959 | 0.965 | -6.57 | 0.54886 | none |
| PSMD8    | -0.007 | -0.0457 | -0.077 | 0.94005 | 0.965 | -6.57 | -0.5311 | none |
| CD2AP    | 0.02   | 0.1987  | 0.0768 | 0.94037 | 0.966 | -6.57 | 1.07685 | none |
| DEK      | 0.014  | 0.1044  | 0.0767 | 0.94044 | 0.966 | -6.57 | 1.35698 | none |
| ANXA6    | -0.011 | 0.045   | -0.077 | 0.94048 | 0.966 | -6.57 | 1.07244 | none |
| OR2A7    | 0.007  | 0.065   | 0.0766 | 0.94053 | 0.966 | -6.57 | 0.94039 | none |
| PXMP2    | 0.015  | -0.0231 | 0.0765 | 0.94062 | 0.966 | -6.57 | -0.0433 | none |
| NUTM2G   | -0.008 | 0.0035  | -0.076 | 0.94063 | 0.966 | -6.57 | -0.8736 | none |
| NT5M     | -0.023 | -0.0679 | -0.076 | 0.94073 | 0.966 | -6.57 | -0.268  | none |
| ZNF366   | -0.009 | -0.0337 | -0.076 | 0.94086 | 0.966 | -6.57 | 0.80535 | none |
| TBC1D16  | 0.009  | 0.0497  | 0.0759 | 0.94108 | 0.966 | -6.57 | 0.56431 | none |
| ZC3H12C  | -0.009 | 0.0473  | -0.076 | 0.94127 | 0.966 | -6.57 | 0.72358 | none |
| ABCF2    | 0.013  | 0.1228  | 0.0754 | 0.94145 | 0.966 | -6.57 | 1.28015 | none |
| UBXN1    | -0.008 | -0.0131 | -0.075 | 0.94159 | 0.966 | -6.57 | 0.61725 | none |
| SYCN     | 0.007  | 0.028   | 0.0751 | 0.94166 | 0.966 | -6.57 | 1.46578 | none |
| TAF11    | 0.007  | -0.024  | 0.075  | 0.94174 | 0.966 | -6.57 | 0.82032 | none |
| DKC1     | 0.005  | 0.0112  | 0.0749 | 0.9418  | 0.966 | -6.57 | 0.58128 | none |
| FERMT3   | -0.008 | 0.0612  | -0.075 | 0.94196 | 0.966 | -6.57 | 0.61629 | none |
| PRPF38A  | -0.005 | -0.0669 | -0.074 | 0.94218 | 0.967 | -6.57 | 0.26778 | none |
| POMC     | 0.013  | -0.0222 | 0.0744 | 0.94223 | 0.967 | -6.57 | 0.52158 | none |
| ERGIC3   | -0.01  | -0.0728 | -0.074 | 0.94242 | 0.967 | -6.57 | 0.93119 | none |
| WDR38    | -0.006 | 0.029   | -0.074 | 0.94271 | 0.967 | -6.57 | -0.3059 | none |
| MYSM1    | 0.022  | 0.119   | 0.0737 | 0.94275 | 0.967 | -6.57 | 0.69073 | none |
| KDELC1   | 0.011  | 0.029   | 0.0737 | 0.94278 | 0.967 | -6.57 | 0.2611  | none |
| NUBP2    | 0.01   | -0.0217 | 0.0736 | 0.94285 | 0.967 | -6.57 | 0.4706  | none |
| TRIM27   | -0.041 | 0.0369  | -0.073 | 0.94317 | 0.967 | -6.57 | 1.24359 | none |
| CNGB3    | -0.006 | #####   | -0.073 | 0.94331 | 0.967 | -6.57 | -0.4367 | none |

|           |        |         |        |         |       |       |         |      |
|-----------|--------|---------|--------|---------|-------|-------|---------|------|
| ZNF521    | 0.015  | 0.023   | 0.0726 | 0.94361 | 0.968 | -6.57 | 1.33677 | none |
| GPAA1     | -0.009 | -0.0326 | -0.072 | 0.9437  | 0.968 | -6.57 | 1.64187 | none |
| UNC5B     | -0.005 | 0.0136  | -0.072 | 0.94371 | 0.968 | -6.57 | 0       | none |
| CCNK      | -0.019 | 0.1063  | -0.072 | 0.94393 | 0.968 | -6.57 | 0.99432 | none |
| ZNF782    | 0.01   | 0.0453  | 0.0722 | 0.94394 | 0.968 | -6.57 | -0.1483 | none |
| RFNG      | -0.014 | -0.0555 | -0.072 | 0.94402 | 0.968 | -6.57 | 0.52227 | none |
| RGS2      | 0.012  | -0.0225 | 0.072  | 0.94405 | 0.968 | -6.57 | -0.0422 | none |
| GPR171    | -0.015 | -0.1011 | -0.072 | 0.94407 | 0.968 | -6.57 | -0.1383 | none |
| LYPD3     | 0.009  | -0.0172 | 0.0718 | 0.94426 | 0.968 | -6.57 | 1.58415 | none |
| SUGCT     | 0.007  | #####   | 0.0716 | 0.94435 | 0.968 | -6.57 | 0.75764 | none |
| KLRC1     | 0.01   | 0.0973  | 0.0715 | 0.94447 | 0.968 | -6.57 | 1.15956 | none |
| PYURF     | -0.008 | -0.0682 | -0.071 | 0.94469 | 0.968 | -6.57 | 0.28002 | none |
| RBPJ      | 0.006  | -0.0358 | 0.0711 | 0.94473 | 0.968 | -6.57 | 0.03642 | none |
| CUBN      | -0.008 | -0.0421 | -0.071 | 0.94477 | 0.968 | -6.57 | -0.3811 | none |
| CHUK      | -0.013 | 0.0364  | -0.071 | 0.94494 | 0.968 | -6.57 | 0.85022 | none |
| HSD17B8   | -0.011 | 0.0207  | -0.071 | 0.94494 | 0.968 | -6.57 | 0.64014 | none |
| SMC2      | 0.03   | 0.2871  | 0.0704 | 0.94533 | 0.968 | -6.57 | 0.58617 | none |
| KDELR1    | -0.01  | -0.0463 | -0.07  | 0.94542 | 0.968 | -6.57 | 0.58061 | none |
| C9ORF131  | 0.019  | -0.0131 | 0.0701 | 0.94553 | 0.969 | -6.57 | -0.5496 | none |
| SPC25     | -0.03  | 0.0924  | -0.07  | 0.94574 | 0.969 | -6.57 | 0.33101 | none |
| NKX2-5    | -0.008 | -0.0397 | -0.07  | 0.9458  | 0.969 | -6.57 | 1.59014 | none |
| PITHD1    | 0.008  | -0.0253 | 0.0697 | 0.94587 | 0.969 | -6.57 | 1.45131 | none |
| IL17REL   | 0.005  | 0.01    | 0.0694 | 0.9461  | 0.969 | -6.57 | -0.5592 | none |
| UPP1      | -0.014 | -0.0619 | -0.069 | 0.94616 | 0.969 | -6.57 | 0.0371  | none |
| KIAA0895L | -0.007 | -0.0201 | -0.069 | 0.94629 | 0.969 | -6.57 | -0.4977 | none |
| SYNC      | 0.007  | 0.0464  | 0.0691 | 0.94631 | 0.969 | -6.57 | 0.68058 | none |
| RBM7      | -0.015 | -0.1536 | -0.069 | 0.94647 | 0.969 | -6.57 | 0.29526 | none |
| C11ORF97  | 0.007  | 0.0073  | 0.0687 | 0.94664 | 0.969 | -6.57 | 1.37194 | none |
| KRT36     | 0.005  | 0.0051  | 0.0685 | 0.94675 | 0.969 | -6.57 | 0       | none |
| CAB39     | -0.011 | 0.0609  | -0.069 | 0.94675 | 0.969 | -6.57 | 0.7411  | none |
| GRPEL2    | -0.01  | -0.0471 | -0.069 | 0.94678 | 0.969 | -6.57 | 0.86325 | none |
| KRTAP13-1 | 0.007  | 0.0069  | 0.0683 | 0.94695 | 0.969 | -6.57 | -0.148  | none |
| ARHGAP18  | 0.012  | 0.0451  | 0.068  | 0.94718 | 0.969 | -6.57 | 0.0298  | none |
| ST8SIA2   | -0.005 | 0.0052  | -0.068 | 0.94723 | 0.969 | -6.57 | 0       | none |
| B4GALT1   | 0.008  | 0.0205  | 0.0678 | 0.94733 | 0.969 | -6.57 | -0.3719 | none |
| RNPS1     | -0.006 | 0.0352  | -0.068 | 0.9474  | 0.969 | -6.57 | -0.0224 | none |
| TMUB1     | 0.007  | -0.0102 | 0.0676 | 0.9475  | 0.969 | -6.57 | 0.28728 | none |
| CRYGS     | -0.028 | 0.0586  | -0.067 | 0.94767 | 0.969 | -6.57 | 1.21289 | none |
| NSMCE4A   | 0.007  | -0.0147 | 0.0673 | 0.94769 | 0.969 | -6.57 | 1.05768 | none |
| HPR       | 0.005  | -0.0135 | 0.0672 | 0.94778 | 0.969 | -6.57 | 1.2109  | none |



|           |        |         |        |         |       |       |         |      |
|-----------|--------|---------|--------|---------|-------|-------|---------|------|
| SPA17     | -0.013 | -0.0259 | -0.067 | 0.9478  | 0.969 | -6.57 | -0.3041 | none |
| BRMS1     | -0.006 | #####   | -0.067 | 0.94781 | 0.969 | -6.57 | 0.53643 | none |
| DDX20     | 0.006  | 0.0624  | 0.067  | 0.94793 | 0.97  | -6.57 | 1.67102 | none |
| GMDS      | -0.007 | #####   | -0.067 | 0.94809 | 0.97  | -6.57 | 1.42606 | none |
| ATXN1L    | 0.009  | 0.0221  | 0.0664 | 0.94838 | 0.97  | -6.57 | 1.62094 | none |
| TIMM22    | 0.054  | -0.0467 | 0.0664 | 0.94842 | 0.97  | -6.57 | -0.4594 | none |
| GZF1      | 0.016  | 0.1122  | 0.0663 | 0.94851 | 0.97  | -6.57 | 0.77084 | none |
| C11ORF58  | 0.009  | -0.0759 | 0.0662 | 0.94858 | 0.97  | -6.57 | -0.4708 | none |
| CCDC51    | 0.009  | -0.0198 | 0.066  | 0.94874 | 0.97  | -6.57 | -0.2704 | none |
| LRRC52    | 0.005  | 0.0181  | 0.066  | 0.94876 | 0.97  | -6.57 | 1.24597 | none |
| BLOC1S5-1 | -0.023 | 0.1034  | -0.066 | 0.94888 | 0.97  | -6.57 | 0.84742 | none |
| TSSC4     | -0.006 | 0.0076  | -0.066 | 0.94889 | 0.97  | -6.57 | 0.17893 | none |
| RIBC2     | -0.011 | 0.0865  | -0.066 | 0.94893 | 0.97  | -6.57 | 1.51532 | none |
| FAM185A   | -0.006 | 0.0462  | -0.066 | 0.94898 | 0.97  | -6.57 | 0.90676 | none |
| TSPO2     | 0.008  | 0.0246  | 0.0656 | 0.94905 | 0.97  | -6.57 | 0.37431 | none |
| COL4A5    | 0.009  | 0.0147  | 0.0655 | 0.94913 | 0.97  | -6.57 | -0.0943 | none |
| LRRC30    | 0.006  | 0.0055  | 0.0647 | 0.94974 | 0.971 | -6.57 | -0.2947 | none |
| HMGA1     | -0.006 | 0.0161  | -0.065 | 0.94985 | 0.971 | -6.57 | 1.38879 | none |
| IL17F     | 0.026  | -0.0924 | 0.0641 | 0.95017 | 0.971 | -6.57 | 0.55248 | none |
| PRIMPOL   | -0.008 | -0.0521 | -0.064 | 0.95041 | 0.971 | -6.57 | -0.6641 | none |
| TPRKB     | -0.008 | -0.1076 | -0.064 | 0.95055 | 0.971 | -6.57 | 0.50693 | none |
| RAPGEFL1  | 0.01   | 0.1378  | 0.0636 | 0.95062 | 0.971 | -6.57 | 0.22076 | none |
| SERINC3   | -0.009 | -0.1058 | -0.063 | 0.95067 | 0.971 | -6.57 | 0.94755 | none |
| ESRP2     | 0.012  | 0.0938  | 0.0632 | 0.95089 | 0.971 | -6.57 | 0.86638 | none |
| CXCL2     | -0.006 | 0.0204  | -0.063 | 0.951   | 0.971 | -6.57 | 0.43905 | none |
| WIZ       | 0.012  | 0.1766  | 0.063  | 0.95102 | 0.971 | -6.57 | 0.71903 | none |
| DCUN1D3   | -0.009 | #####   | -0.063 | 0.95129 | 0.972 | -6.57 | 1.68064 | none |
| LMNTD2    | 0.006  | 0.0365  | 0.0626 | 0.95135 | 0.972 | -6.57 | -0.1468 | none |
| FUNDC2    | -0.007 | -0.0801 | -0.062 | 0.95165 | 0.972 | -6.57 | 0.55195 | none |
| FARSB     | 0.007  | 0.0092  | 0.0622 | 0.95167 | 0.972 | -6.57 | 1.0523  | none |
| RNF146    | 0.006  | -0.0215 | 0.0621 | 0.95172 | 0.972 | -6.57 | 0.24965 | none |
| SPACA3    | -0.007 | 0.0196  | -0.062 | 0.95196 | 0.972 | -6.57 | 1.07615 | none |
| HPSE      | 0.008  | -0.1052 | 0.0618 | 0.95196 | 0.972 | -6.57 | 0.41096 | none |
| CIAPIN1   | 0.006  | -0.0304 | 0.0615 | 0.95218 | 0.972 | -6.57 | 0.17196 | none |
| SHARPIN   | 0.007  | 0.0065  | 0.0614 | 0.9523  | 0.972 | -6.57 | -0.024  | none |
| POLDIP2   | 0.007  | #####   | 0.0609 | 0.95266 | 0.972 | -6.57 | 0.88428 | none |
| TEX261    | -0.006 | -0.0013 | -0.061 | 0.95277 | 0.973 | -6.57 | 0.5053  | none |
| SSX3      | -0.007 | 0.0112  | -0.061 | 0.95295 | 0.973 | -6.57 | 0.56893 | none |
| TWF1      | -0.007 | -0.0167 | -0.06  | 0.95322 | 0.973 | -6.57 | 1.5032  | none |
| CA8       | 0.005  | 0.0217  | 0.0601 | 0.95334 | 0.973 | -6.57 | 1.256   | none |

|          |        |         |        |         |       |       |         |      |
|----------|--------|---------|--------|---------|-------|-------|---------|------|
| DNAJC5   | -0.006 | 0.0546  | -0.06  | 0.95353 | 0.973 | -6.57 | 0.88014 | none |
| SEC24A   | 0.006  | 0.0195  | 0.0597 | 0.95362 | 0.973 | -6.57 | 0.84923 | none |
| EIF5A2   | 0.011  | -0.1178 | 0.0597 | 0.95363 | 0.973 | -6.57 | 0.83784 | none |
| MRGBP    | -0.006 | 0.0215  | -0.06  | 0.95364 | 0.973 | -6.57 | 0.7042  | none |
| CACNG6   | 0.005  | 0.0113  | 0.0592 | 0.95402 | 0.973 | -6.57 | 0.26554 | none |
| HDC      | -0.006 | -0.0188 | -0.059 | 0.95415 | 0.973 | -6.57 | 1.6195  | none |
| PPP2R2C  | -0.011 | 0.0072  | -0.059 | 0.95438 | 0.973 | -6.57 | 0.64831 | none |
| TNFRSF9  | -0.007 | 0.0473  | -0.059 | 0.95443 | 0.973 | -6.57 | 0.10587 | none |
| MTF1     | 0.013  | 0.0454  | 0.0586 | 0.95444 | 0.973 | -6.57 | 0.00574 | none |
| CWC27    | -0.015 | 0.0708  | -0.059 | 0.95449 | 0.973 | -6.57 | 1.30395 | none |
| SMPD2    | -0.007 | -0.0747 | -0.058 | 0.95457 | 0.974 | -6.57 | 0.41459 | none |
| MRPL2    | 0.007  | -0.0368 | 0.0584 | 0.95464 | 0.974 | -6.57 | -0.2125 | none |
| C1QL3    | 0.005  | 0.0383  | 0.0581 | 0.95483 | 0.974 | -6.57 | 0.7104  | none |
| MFSD2A   | 0.007  | 0.0131  | 0.0578 | 0.95506 | 0.974 | -6.57 | 0.5431  | none |
| HOXD3    | 0.009  | 0.0399  | 0.0563 | 0.95624 | 0.975 | -6.57 | 0.2307  | none |
| AMY1A    | -0.006 | 0.0133  | -0.056 | 0.95634 | 0.975 | -6.57 | 1.89673 | none |
| TRMT61A  | 0.004  | 0.0554  | 0.0561 | 0.9564  | 0.975 | -6.57 | 0.41957 | none |
| ABCC12   | 0.005  | 0.0519  | 0.0561 | 0.95641 | 0.975 | -6.57 | -0.5518 | none |
| ACTA1    | -0.005 | #####   | -0.056 | 0.95641 | 0.975 | -6.57 | -0.3604 | none |
| ZNF593   | 0.007  | -0.0051 | 0.0554 | 0.95694 | 0.975 | -6.57 | 1.56814 | none |
| PRNP     | 0.005  | -0.0406 | 0.0548 | 0.95744 | 0.976 | -6.57 | 1.24899 | none |
| INIP     | 0.006  | -0.041  | 0.0547 | 0.95752 | 0.976 | -6.57 | -0.6117 | none |
| AES      | 0.01   | 0.0568  | 0.0547 | 0.95753 | 0.976 | -6.57 | 1.09603 | none |
| TMEM9    | 0.009  | -0.073  | 0.0546 | 0.95757 | 0.976 | -6.57 | -0.0396 | none |
| LPL      | -0.006 | 0.0122  | -0.055 | 0.95759 | 0.976 | -6.57 | 0.61384 | none |
| LTBP1    | 0.005  | 0.0328  | 0.0545 | 0.95762 | 0.976 | -6.57 | 0.22779 | none |
| WDR70    | 0.013  | 0.0587  | 0.0543 | 0.95782 | 0.976 | -6.57 | 0.62237 | none |
| TRAF1    | -0.008 | 0.1102  | -0.054 | 0.9579  | 0.976 | -6.57 | 1.36783 | none |
| AK5      | -0.018 | -0.0477 | -0.054 | 0.95794 | 0.976 | -6.57 | 0.65554 | none |
| USP20    | 0.007  | 0.1005  | 0.054  | 0.95804 | 0.976 | -6.57 | -0.003  | none |
| MERTK    | 0.006  | -0.0273 | 0.0539 | 0.95808 | 0.976 | -6.57 | 1.2867  | none |
| AZGP1    | -0.007 | 0.0128  | -0.054 | 0.95816 | 0.976 | -6.57 | 0.0816  | none |
| FRAT2    | -0.008 | -0.0292 | -0.054 | 0.95819 | 0.976 | -6.57 | -0.502  | none |
| SORD     | 0.006  | 0.0132  | 0.0535 | 0.95839 | 0.976 | -6.57 | 1.13224 | none |
| CEACAM1  | -0.004 | 0.0087  | -0.053 | 0.95844 | 0.976 | -6.57 | 1.05833 | none |
| TRIM74   | -0.004 | -0.0045 | -0.053 | 0.95865 | 0.976 | -6.57 | -0.8801 | none |
| ATP6AP1  | 0.006  | -0.0238 | 0.053  | 0.95879 | 0.976 | -6.57 | 0.90592 | none |
| TRAPPC6A | -0.007 | -0.065  | -0.053 | 0.95889 | 0.976 | -6.57 | 1.21548 | none |
| ZNF367   | 0.006  | 0.0427  | 0.0529 | 0.95892 | 0.976 | -6.57 | 0.18393 | none |
| RNMT     | -0.01  | 0.0146  | -0.053 | 0.95893 | 0.976 | -6.57 | 0.07863 | none |

|          |        |         |        |         |       |       |         |      |
|----------|--------|---------|--------|---------|-------|-------|---------|------|
| DDX1     | -0.008 | 0.0565  | -0.053 | 0.95917 | 0.976 | -6.57 | 1.31429 | none |
| PPP1R3E  | -0.007 | -0.0291 | -0.052 | 0.95924 | 0.976 | -6.57 | -0.0294 | none |
| SLC35G1  | -0.01  | -0.0457 | -0.052 | 0.95957 | 0.977 | -6.57 | 0.22408 | none |
| MAPK4    | -0.004 | #####   | -0.052 | 0.95958 | 0.977 | -6.57 | -0.1593 | none |
| BEND3    | 0.008  | 0.111   | 0.0516 | 0.95988 | 0.977 | -6.57 | 0.25606 | none |
| TCTEX1D4 | 0.007  | 0.0198  | 0.0514 | 0.96004 | 0.977 | -6.57 | 0.2484  | none |
| PCNP     | -0.004 | -0.0122 | -0.051 | 0.96012 | 0.977 | -6.57 | -0.8827 | none |
| APOO     | -0.008 | -0.1214 | -0.051 | 0.96051 | 0.977 | -6.57 | 0.11561 | none |
| ALDH3A2  | -0.005 | -0.0485 | -0.051 | 0.96052 | 0.977 | -6.57 | -0.4549 | none |
| LY96     | -0.011 | -0.267  | -0.05  | 0.96087 | 0.978 | -6.57 | 0.01456 | none |
| MAP2K6   | 0.011  | -0.0133 | 0.0503 | 0.96089 | 0.978 | -6.57 | -0.6534 | none |
| JUND     | -0.006 | 0.0161  | -0.05  | 0.96095 | 0.978 | -6.57 | -0.2291 | none |
| APOC4-AP | 0.004  | 0.0152  | 0.0501 | 0.9611  | 0.978 | -6.57 | 0       | none |
| RGPD2    | -0.011 | 0.0243  | -0.05  | 0.96115 | 0.978 | -6.57 | 0.09376 | none |
| HBD      | -0.005 | 0.0105  | -0.05  | 0.96116 | 0.978 | -6.57 | 0.8233  | none |
| PI15     | -0.004 | -0.001  | -0.05  | 0.9612  | 0.978 | -6.57 | 0       | none |
| CCDC82   | -0.011 | -0.0213 | -0.05  | 0.96147 | 0.978 | -6.57 | -0.2567 | none |
| PLAGL1   | 0.007  | 0.0171  | 0.0495 | 0.96154 | 0.978 | -6.57 | -0.2035 | none |
| UBALD1   | -0.011 | 0.0251  | -0.049 | 0.96163 | 0.978 | -6.57 | 0.69634 | none |
| RAI14    | -0.011 | -0.035  | -0.049 | 0.96172 | 0.978 | -6.57 | 1.0389  | none |
| PRMT2    | -0.005 | #####   | -0.049 | 0.96173 | 0.978 | -6.57 | 0.69787 | none |
| ZFP36    | -0.006 | -0.0459 | -0.049 | 0.96178 | 0.978 | -6.57 | 1.288   | none |
| IL1A     | 0.005  | 0.0619  | 0.049  | 0.96192 | 0.978 | -6.57 | -0.0109 | none |
| DNAJB2   | 0.007  | 0.0615  | 0.0488 | 0.96203 | 0.978 | -6.57 | 1.09615 | none |
| PRH2     | 0.004  | 0.0122  | 0.0488 | 0.96205 | 0.978 | -6.57 | 1.18522 | none |
| ITGB4    | 0.013  | -0.061  | 0.0487 | 0.96211 | 0.978 | -6.57 | 0.26494 | none |
| ERICH3   | -0.008 | -0.0126 | -0.049 | 0.96216 | 0.978 | -6.57 | 1.31447 | none |
| MGME1    | 0.005  | 0.0162  | 0.0486 | 0.9622  | 0.978 | -6.57 | 0.37081 | none |
| PPAN-P2R | -0.01  | 0.0851  | -0.048 | 0.9624  | 0.978 | -6.57 | 0.34624 | none |
| ACKR1    | 0.003  | 0.0125  | 0.0484 | 0.96241 | 0.978 | -6.57 | -0.4888 | none |
| TMEM191  | -0.005 | -0.0078 | -0.048 | 0.96242 | 0.978 | -6.57 | -0.2258 | none |
| CPNE3    | -0.005 | -0.0871 | -0.048 | 0.96263 | 0.978 | -6.57 | 0.16209 | none |
| FOXRED1  | -0.005 | -0.0197 | -0.048 | 0.96286 | 0.978 | -6.57 | 0.96559 | none |
| RNPC3    | -0.008 | -0.012  | -0.048 | 0.96288 | 0.978 | -6.57 | 1.31909 | none |
| SH2B2    | 0.012  | 0.15    | 0.0476 | 0.963   | 0.978 | -6.57 | 0.08109 | none |
| WNT6     | 0.005  | 0.0198  | 0.0468 | 0.96362 | 0.979 | -6.57 | -0.3005 | none |
| OR6V1    | -0.003 | 0.0154  | -0.046 | 0.96402 | 0.979 | -6.57 | -0.1122 | none |
| WDR1     | -0.006 | 0.0469  | -0.046 | 0.96404 | 0.979 | -6.57 | 1.07619 | none |
| CD207    | 0.003  | 0.01    | 0.0462 | 0.96406 | 0.979 | -6.57 | 0       | none |
| CYB5R1   | 0.005  | -0.0935 | 0.0461 | 0.96417 | 0.979 | -6.57 | -0.4599 | none |

|          |        |         |        |         |       |       |         |      |
|----------|--------|---------|--------|---------|-------|-------|---------|------|
| RALGAPA2 | -0.008 | 0.0343  | -0.046 | 0.96418 | 0.979 | -6.57 | -0.1939 | none |
| LHB      | 0.009  | 0.024   | 0.046  | 0.96423 | 0.979 | -6.57 | -0.7486 | none |
| FBXO3    | -0.009 | -0.0651 | -0.046 | 0.96437 | 0.979 | -6.57 | -0.4489 | none |
| TSN      | 0.005  | -0.0639 | 0.0454 | 0.96471 | 0.98  | -6.57 | 0.21263 | none |
| TEAD3    | -0.004 | 0.018   | -0.045 | 0.96476 | 0.98  | -6.57 | 1.70801 | none |
| SPCS2    | -0.006 | -0.0674 | -0.045 | 0.96495 | 0.98  | -6.57 | -0.4096 | none |
| BAX      | -0.005 | 0.02    | -0.045 | 0.96498 | 0.98  | -6.57 | 0.56875 | none |
| TREML1   | 0.004  | 0.0303  | 0.045  | 0.96502 | 0.98  | -6.57 | 0.39779 | none |
| TMEM161  | -0.005 | -0.0081 | -0.045 | 0.96502 | 0.98  | -6.57 | 0.67719 | none |
| RNF219   | -0.005 | -0.0216 | -0.045 | 0.96502 | 0.98  | -6.57 | 0.9533  | none |
| CELSR1   | 0.005  | 0.0529  | 0.0448 | 0.96516 | 0.98  | -6.57 | -0.0698 | none |
| SPATA22  | 0.005  | 0.0035  | 0.0448 | 0.96519 | 0.98  | -6.57 | 0.20182 | none |
| FAM47B   | 0.003  | 0.0031  | 0.0448 | 0.9652  | 0.98  | -6.57 | 0       | none |
| KCNS1    | 0.004  | 0.0045  | 0.0447 | 0.96527 | 0.98  | -6.57 | 0.04782 | none |
| CXCL9    | 0.004  | 0.0254  | 0.0445 | 0.96539 | 0.98  | -6.57 | 0.03773 | none |
| FOXE1    | 0.004  | 0.0072  | 0.0445 | 0.96545 | 0.98  | -6.57 | 0.99052 | none |
| WDR5     | 0.004  | 0.0491  | 0.0444 | 0.96553 | 0.98  | -6.57 | 1.61663 | none |
| PTGS1    | -0.004 | 0.0393  | -0.044 | 0.96554 | 0.98  | -6.57 | 0.27175 | none |
| LUZP4    | 0.003  | 0.0133  | 0.0441 | 0.9657  | 0.98  | -6.57 | 0       | none |
| PUS7L    | -0.006 | -0.0481 | -0.044 | 0.96598 | 0.98  | -6.57 | 0.37051 | none |
| TRIM49B  | 0.005  | 0.0075  | 0.0437 | 0.966   | 0.98  | -6.57 | 1.15927 | none |
| CACHD1   | 0.003  | 0.0158  | 0.0437 | 0.96606 | 0.98  | -6.57 | 1.48108 | none |
| EEPD1    | -0.009 | -0.0089 | -0.044 | 0.96608 | 0.98  | -6.57 | 0.50496 | none |
| MAP2     | -0.003 | 0.0036  | -0.044 | 0.96608 | 0.98  | -6.57 | -0.6683 | none |
| TP53RK   | -0.005 | -0.0499 | -0.043 | 0.96641 | 0.98  | -6.57 | 1.19447 | none |
| RYK      | -0.011 | -0.0557 | -0.043 | 0.96657 | 0.98  | -6.57 | 1.01635 | none |
| SLC19A2  | 0.007  | 0.015   | 0.0429 | 0.96663 | 0.98  | -6.57 | 1.37488 | none |
| P2RX1    | 0.004  | 0.0166  | 0.0429 | 0.96666 | 0.98  | -6.57 | 1.3633  | none |
| VSIG4    | -0.003 | 0.0034  | -0.043 | 0.96695 | 0.98  | -6.57 | 0       | none |
| FLAD1    | 0.005  | -0.0121 | 0.0424 | 0.96706 | 0.98  | -6.57 | 0.55    | none |
| AC026348 | -0.005 | -0.0265 | -0.042 | 0.9674  | 0.981 | -6.57 | -0.0662 | none |
| KCNA2    | -0.004 | 0.0443  | -0.042 | 0.96742 | 0.981 | -6.57 | 0.58326 | none |
| HTR5A    | 0.003  | 0.0076  | 0.0416 | 0.96768 | 0.981 | -6.57 | 0       | none |
| KATNB1   | -0.005 | 0.0348  | -0.041 | 0.96778 | 0.981 | -6.57 | 1.3184  | none |
| S100A2   | -0.007 | -0.0118 | -0.041 | 0.96811 | 0.981 | -6.57 | 0.70425 | none |
| DHRS3    | 0.005  | -0.0616 | 0.0409 | 0.96817 | 0.981 | -6.57 | -0.6478 | none |
| IFNAR2   | 0.005  | -0.0817 | 0.0405 | 0.96849 | 0.981 | -6.57 | 0.88523 | none |
| ST6GALNA | 0.005  | 0.0036  | 0.0404 | 0.96858 | 0.981 | -6.57 | -0.6397 | none |
| GNAQ     | -0.005 | -0.0171 | -0.04  | 0.96879 | 0.982 | -6.57 | -0.2599 | none |
| ZNF205   | 0.006  | -0.018  | 0.0401 | 0.96879 | 0.982 | -6.57 | 1.06523 | none |

|          |        |         |        |         |       |       |         |      |
|----------|--------|---------|--------|---------|-------|-------|---------|------|
| FKBP4    | -0.004 | 0.0375  | -0.04  | 0.96881 | 0.982 | -6.57 | 0.42223 | none |
| GALP     | 0.003  | 0.0151  | 0.04   | 0.96892 | 0.982 | -6.57 | -0.314  | none |
| ZFP69B   | -0.004 | 0.0232  | -0.04  | 0.96897 | 0.982 | -6.57 | 1.52245 | none |
| ZMAT5    | 0.007  | -0.0013 | 0.0398 | 0.96906 | 0.982 | -6.57 | 0.60226 | none |
| ARF3     | -0.005 | -0.0128 | -0.04  | 0.96918 | 0.982 | -6.57 | 1.6712  | none |
| MAP3K7CI | 0.006  | -0.0486 | 0.0391 | 0.96964 | 0.982 | -6.57 | -0.7152 | none |
| ARHGAP9  | 0.004  | 0.0385  | 0.039  | 0.9697  | 0.982 | -6.57 | 0.6908  | none |
| RBM45    | 0.006  | 0.0601  | 0.0388 | 0.96987 | 0.982 | -6.57 | -0.1488 | none |
| MTMR8    | 0.006  | 0.0311  | 0.0388 | 0.96987 | 0.982 | -6.57 | 0.64807 | none |
| ALX3     | 0.006  | 0.0771  | 0.0386 | 0.96997 | 0.982 | -6.57 | -0.0409 | none |
| STOX1    | 0.003  | 0.0295  | 0.0379 | 0.97055 | 0.983 | -6.57 | 1.15631 | none |
| LAPTM4B  | 0.005  | -0.0734 | 0.0369 | 0.97132 | 0.983 | -6.57 | 0.71342 | none |
| KRT81    | -0.003 | -0.0075 | -0.037 | 0.97134 | 0.983 | -6.57 | 1.07175 | none |
| RNF7     | -0.006 | -0.0987 | -0.036 | 0.97164 | 0.984 | -6.57 | 0.17984 | none |
| PTPRG    | 0.003  | 0.0151  | 0.0361 | 0.97195 | 0.984 | -6.57 | -0.4389 | none |
| HOXC8    | -0.003 | -0.0118 | -0.036 | 0.97197 | 0.984 | -6.57 | 0       | none |
| FBXO41   | 0.006  | 0.0702  | 0.0357 | 0.97222 | 0.984 | -6.57 | 0.82924 | none |
| ZMAT4    | 0.003  | 0.0223  | 0.0351 | 0.97272 | 0.984 | -6.57 | -0.4176 | none |
| PHPT1    | -0.005 | -0.0216 | -0.035 | 0.97286 | 0.985 | -6.57 | 0.36877 | none |
| LIMS4    | 0.003  | 0.0078  | 0.0349 | 0.97289 | 0.985 | -6.57 | 0.74567 | none |
| ZNF670   | 0.003  | -0.0545 | 0.0346 | 0.97312 | 0.985 | -6.57 | 0.56032 | none |
| IPPK     | 0.003  | 0.016   | 0.0346 | 0.97312 | 0.985 | -6.57 | 1.50997 | none |
| SMG8     | 0.003  | #####   | 0.0345 | 0.97315 | 0.985 | -6.57 | 1.0133  | none |
| CCDC71   | 0.006  | 0.0906  | 0.0342 | 0.97338 | 0.985 | -6.57 | 1.3479  | none |
| TSGA10   | -0.008 | -0.0499 | -0.034 | 0.9734  | 0.985 | -6.57 | 0.52882 | none |
| ANKRD35  | -0.002 | 0.0046  | -0.034 | 0.97378 | 0.985 | -6.57 | 0.71334 | none |
| SPACA1   | 0.002  | 0.014   | 0.0336 | 0.97384 | 0.985 | -6.57 | -0.3129 | none |
| ARMC10   | -0.006 | -0.0252 | -0.033 | 0.97408 | 0.985 | -6.57 | 1.62684 | none |
| NFYB     | -0.006 | -0.062  | -0.033 | 0.97418 | 0.985 | -6.57 | 0.60661 | none |
| UNC13A   | 0.005  | 0.023   | 0.0332 | 0.97419 | 0.985 | -6.57 | -0.0168 | none |
| PEAR1    | 0.003  | 0.0349  | 0.0332 | 0.97419 | 0.985 | -6.57 | -0.2966 | none |
| TMEM89   | 0.007  | 0.0247  | 0.033  | 0.97437 | 0.985 | -6.57 | 0.50904 | none |
| CDKN2AIP | 0.006  | 0.103   | 0.0329 | 0.97443 | 0.985 | -6.57 | 1.8787  | none |
| DNPH1    | 0.005  | -0.0319 | 0.0326 | 0.97469 | 0.986 | -6.57 | -0.3623 | none |
| PDE1C    | -0.003 | -0.01   | -0.032 | 0.97484 | 0.986 | -6.57 | 0.93525 | none |
| PCTP     | 0.004  | -0.0834 | 0.0318 | 0.9753  | 0.986 | -6.57 | 1.4633  | none |
| DPH5     | -0.005 | -0.1631 | -0.032 | 0.97533 | 0.986 | -6.57 | -0.0619 | none |
| DUS2     | 0.003  | 0.0385  | 0.0316 | 0.97544 | 0.986 | -6.57 | 1.07365 | none |
| SDF4     | 0.004  | 0.07    | 0.0315 | 0.97553 | 0.986 | -6.57 | 0.55631 | none |
| RAB4A    | -0.003 | -0.0187 | -0.031 | 0.97591 | 0.986 | -6.57 | 1.26466 | none |

|          |        |         |        |         |       |       |         |      |
|----------|--------|---------|--------|---------|-------|-------|---------|------|
| PPOX     | 0.004  | 0.0169  | 0.0308 | 0.97602 | 0.986 | -6.57 | 0.30789 | none |
| CBX3     | -0.002 | -0.0055 | -0.031 | 0.97605 | 0.986 | -6.57 | 0.23058 | none |
| KRT23    | 0.002  | 0.002   | 0.0308 | 0.97609 | 0.986 | -6.57 | 0       | none |
| ZNF836   | 0.007  | -0.0564 | 0.0307 | 0.97616 | 0.986 | -6.57 | -0.4615 | none |
| CDK14    | 0.005  | 0.0538  | 0.0306 | 0.97617 | 0.986 | -6.57 | -0.3824 | none |
| EXTL1    | 0.004  | 0.0366  | 0.0299 | 0.97677 | 0.987 | -6.57 | -0.1581 | none |
| MKX      | -0.002 | #####   | -0.03  | 0.97696 | 0.987 | -6.57 | 1.21525 | none |
| RGCC     | -0.007 | -0.0495 | -0.029 | 0.97738 | 0.987 | -6.57 | 1.05372 | none |
| KLF6     | -0.004 | -0.015  | -0.029 | 0.97742 | 0.987 | -6.57 | 0.73757 | none |
| KDM6B    | -0.01  | 0.2515  | -0.029 | 0.97746 | 0.987 | -6.57 | 0.88742 | none |
| STRADB   | 0.004  | -0.0275 | 0.029  | 0.97748 | 0.987 | -6.57 | 1.36233 | none |
| CENPA    | 0.006  | -0.0226 | 0.0289 | 0.9775  | 0.987 | -6.57 | -0.0388 | none |
| HIST1H3D | 0.011  | -0.129  | 0.0289 | 0.97756 | 0.987 | -6.57 | 0.54125 | none |
| NPPC     | 0.005  | 0.0027  | 0.0286 | 0.97779 | 0.987 | -6.57 | 1.23962 | none |
| USP51    | -0.004 | 0.0788  | -0.028 | 0.97792 | 0.988 | -6.57 | 1.60104 | none |
| TM6SF2   | 0.003  | 0.0103  | 0.0284 | 0.97796 | 0.988 | -6.57 | -0.1849 | none |
| CHST4    | -0.002 | 0.0091  | -0.028 | 0.97813 | 0.988 | -6.57 | -0.3286 | none |
| ANKRD39  | 0.004  | -0.0434 | 0.0275 | 0.97861 | 0.988 | -6.57 | -0.339  | none |
| SOX8     | -0.002 | -0.0042 | -0.027 | 0.97886 | 0.988 | -6.57 | 1.15341 | none |
| MEIS1    | -0.004 | 0.0081  | -0.027 | 0.9789  | 0.988 | -6.57 | -0.5973 | none |
| DBH      | 0.002  | #####   | 0.027  | 0.97902 | 0.988 | -6.57 | -0.4844 | none |
| MYO1A    | -0.004 | -0.0019 | -0.027 | 0.97907 | 0.988 | -6.57 | 0.54444 | none |
| TXNRD3   | -0.005 | 0.0306  | -0.027 | 0.97917 | 0.988 | -6.57 | 0.40386 | none |
| CLIC5    | 0.006  | 0.1087  | 0.0268 | 0.9792  | 0.988 | -6.57 | 0.51622 | none |
| ZNF229   | 0.003  | 0.0191  | 0.0267 | 0.97924 | 0.988 | -6.57 | 1.27085 | none |
| BOD1     | 0.004  | 0.0404  | 0.0264 | 0.97948 | 0.988 | -6.57 | 1.01438 | none |
| AIP      | 0.003  | 0.0247  | 0.0264 | 0.97949 | 0.988 | -6.57 | -0.1774 | none |
| LDLRAD2  | -0.002 | -0.0034 | -0.026 | 0.9799  | 0.989 | -6.57 | -0.1938 | none |
| AC104581 | 0.003  | 0.0467  | 0.0258 | 0.97995 | 0.989 | -6.57 | 0.67516 | none |
| NANS     | -0.003 | -0.0313 | -0.025 | 0.98018 | 0.989 | -6.57 | 0.83477 | none |
| NDUFAF1  | 0.003  | -0.0904 | 0.0255 | 0.9802  | 0.989 | -6.57 | 0.01378 | none |
| LRRC3B   | -0.004 | -0.0157 | -0.025 | 0.98023 | 0.989 | -6.57 | -0.0305 | none |
| SKA2     | 0.004  | -0.0964 | 0.0253 | 0.98037 | 0.989 | -6.57 | -0.5623 | none |
| LRRC40   | 0.004  | #####   | 0.0252 | 0.9804  | 0.989 | -6.57 | 1.79565 | none |
| SPTBN2   | -0.005 | 0.0415  | -0.025 | 0.98059 | 0.989 | -6.57 | 0.66621 | none |
| NOL4L    | 0.004  | -0.0079 | 0.0248 | 0.98071 | 0.989 | -6.57 | -0.0108 | none |
| SLC7A3   | 0.002  | 0.0031  | 0.0243 | 0.98107 | 0.989 | -6.57 | 0.50031 | none |
| EYA2     | 0.005  | 0.0162  | 0.0242 | 0.9812  | 0.989 | -6.57 | -0.2621 | none |
| CCDC59   | -0.004 | 0.046   | -0.024 | 0.98122 | 0.989 | -6.57 | -0.2668 | none |
| KHDRBS3  | -0.004 | 0.0232  | -0.024 | 0.98124 | 0.989 | -6.57 | 1.7286  | none |

|          |        |         |        |         |       |       |         |      |
|----------|--------|---------|--------|---------|-------|-------|---------|------|
| PHYHIP   | -0.002 | 0.0232  | -0.024 | 0.98135 | 0.989 | -6.57 | 1.15292 | none |
| APOM     | 0.002  | 0.0193  | 0.0239 | 0.98145 | 0.99  | -6.57 | 0.87822 | none |
| TMEM59L  | -0.003 | 0.0277  | -0.024 | 0.98165 | 0.99  | -6.57 | -0.5582 | none |
| ZNF324   | -0.003 | 0.0552  | -0.023 | 0.98196 | 0.99  | -6.57 | 0.46185 | none |
| TICAM2   | 0.002  | -0.0134 | 0.023  | 0.98208 | 0.99  | -6.57 | 0.4743  | none |
| C1ORF52  | -0.004 | -0.1309 | -0.023 | 0.98212 | 0.99  | -6.57 | 1.13734 | none |
| POPDC3   | -0.002 | 0.0065  | -0.023 | 0.98222 | 0.99  | -6.57 | 0.85469 | none |
| DHRS7    | 0.003  | -0.0574 | 0.0228 | 0.98227 | 0.99  | -6.57 | -0.1453 | none |
| PRKACG   | -0.002 | #####   | -0.022 | 0.98254 | 0.99  | -6.57 | 1.53129 | none |
| PTTG1IP  | -0.002 | -0.0519 | -0.022 | 0.9826  | 0.99  | -6.57 | 1.00249 | none |
| NEUROG2  | 0.001  | 0.0133  | 0.0224 | 0.98261 | 0.99  | -6.57 | -0.627  | none |
| DHRS7C   | 0.002  | 0.0017  | 0.0221 | 0.9828  | 0.99  | -6.57 | 1.06571 | none |
| SLC25A17 | -0.003 | -0.1071 | -0.022 | 0.9828  | 0.99  | -6.57 | 0.53927 | none |
| SETD9    | 0.005  | -0.0964 | 0.0221 | 0.98284 | 0.99  | -6.57 | 0.87227 | none |
| ERI2     | -0.004 | 0.032   | -0.022 | 0.98305 | 0.99  | -6.57 | 1.20323 | none |
| ANHX     | 0.002  | 0.0119  | 0.0216 | 0.98318 | 0.99  | -6.57 | -0.5105 | none |
| EXOSC3   | -0.002 | -0.0054 | -0.022 | 0.98325 | 0.99  | -6.57 | -0.5739 | none |
| THSD1    | 0.001  | 0.0146  | 0.0215 | 0.98332 | 0.99  | -6.57 | 1.3234  | none |
| TBPL1    | 0.003  | -0.0716 | 0.0212 | 0.98348 | 0.991 | -6.57 | -0.2419 | none |
| TEF      | 0.002  | -0.0302 | 0.0212 | 0.98355 | 0.991 | -6.57 | 1.02771 | none |
| CLDN6    | 0.002  | 0.0097  | 0.021  | 0.9837  | 0.991 | -6.57 | 0.09199 | none |
| PES1     | -0.003 | 0.1464  | -0.021 | 0.98373 | 0.991 | -6.57 | 1.01639 | none |
| TSPAN33  | -0.003 | -0.0051 | -0.021 | 0.98386 | 0.991 | -6.57 | 1.21903 | none |
| TCTEX1D2 | -0.004 | -0.0611 | -0.021 | 0.98392 | 0.991 | -6.57 | 0.11626 | none |
| CCDC148  | -0.002 | -0.0151 | -0.021 | 0.98395 | 0.991 | -6.57 | 0.35411 | none |
| RSAD1    | 0.002  | 0.0312  | 0.0204 | 0.98411 | 0.991 | -6.57 | 1.36533 | none |
| NRXN2    | -0.003 | -0.0049 | -0.02  | 0.98451 | 0.991 | -6.57 | -0.3386 | none |
| CRMP1    | 0.001  | 0.0112  | 0.0198 | 0.9846  | 0.991 | -6.57 | 0.65707 | none |
| AC109486 | -0.004 | -0.0035 | -0.02  | 0.98478 | 0.991 | -6.57 | 1.60493 | none |
| KLHL10   | 0.003  | 0.0185  | 0.0195 | 0.98484 | 0.991 | -6.57 | 1.34477 | none |
| GYPE     | 0.003  | -0.0547 | 0.0195 | 0.98487 | 0.991 | -6.57 | -0.2754 | none |
| CCDC154  | 0.002  | 0.0705  | 0.0193 | 0.98499 | 0.991 | -6.57 | 1.00899 | none |
| INSIG1   | 0.003  | -0.0249 | 0.0193 | 0.985   | 0.991 | -6.57 | 0.98635 | none |
| CTDP1    | -0.003 | 0.0931  | -0.019 | 0.98502 | 0.991 | -6.57 | 0.13061 | none |
| SF3A3    | 0.002  | 0.0613  | 0.0192 | 0.98511 | 0.991 | -6.57 | 0.22176 | none |
| GPR20    | -0.001 | 0.0109  | -0.019 | 0.98513 | 0.991 | -6.57 | 0       | none |
| ZNF580   | -0.002 | -0.0094 | -0.019 | 0.98528 | 0.991 | -6.57 | 1.02082 | none |
| TRPC4AP  | 0.001  | 0.011   | 0.0188 | 0.98535 | 0.991 | -6.57 | 2.06835 | none |
| NCBP2    | -0.002 | -0.0025 | -0.019 | 0.98538 | 0.991 | -6.57 | 1.14479 | none |
| NUTM2A   | 0.001  | 0.0298  | 0.0184 | 0.98572 | 0.992 | -6.57 | 0.02389 | none |

|          |        |         |        |         |       |       |         |      |
|----------|--------|---------|--------|---------|-------|-------|---------|------|
| GPR158   | 0.001  | 0.0262  | 0.0182 | 0.98587 | 0.992 | -6.57 | 0       | none |
| LGALS16  | -0.002 | -0.0021 | -0.018 | 0.98611 | 0.992 | -6.57 | 1.87736 | none |
| QARS     | -0.002 | 0.0062  | -0.018 | 0.98616 | 0.992 | -6.57 | 0.61049 | none |
| CSTF2T   | -0.002 | 0.0034  | -0.018 | 0.98621 | 0.992 | -6.57 | 1.39177 | none |
| SLC39A11 | 0.002  | -0.0167 | 0.0172 | 0.98664 | 0.992 | -6.57 | 0.25001 | none |
| PEPD     | 0.002  | -0.0371 | 0.0172 | 0.98664 | 0.992 | -6.57 | 1.13989 | none |
| PRMT9    | 0.001  | 0.0134  | 0.0169 | 0.98682 | 0.992 | -6.57 | 1.46307 | none |
| AAAS     | 0.002  | -0.0218 | 0.0169 | 0.98686 | 0.992 | -6.57 | 1.23398 | none |
| GAGE1    | -0.001 | -0.0112 | -0.017 | 0.98692 | 0.992 | -6.57 | -0.7466 | none |
| CMTM4    | -0.003 | -0.0235 | -0.016 | 0.98725 | 0.993 | -6.57 | 0.50732 | none |
| PPP1R32  | 0.004  | 0.075   | 0.0163 | 0.98731 | 0.993 | -6.57 | -0.0491 | none |
| CCL24    | -0.002 | 0.0192  | -0.016 | 0.98733 | 0.993 | -6.57 | 0.97771 | none |
| ACP6     | 0.004  | -0.0467 | 0.0161 | 0.98749 | 0.993 | -6.57 | 0.44135 | none |
| PLRG1    | -0.002 | -0.0279 | -0.016 | 0.98766 | 0.993 | -6.57 | -0.2828 | none |
| AKAP11   | 0.003  | 0.0889  | 0.0151 | 0.98828 | 0.993 | -6.57 | 0.85468 | none |
| ORC5     | -0.002 | -0.0529 | -0.015 | 0.98843 | 0.993 | -6.57 | 0.76213 | none |
| USP43    | -0.001 | 0.034   | -0.015 | 0.98851 | 0.993 | -6.57 | 0.01797 | none |
| NMRK1    | 0.002  | -0.0426 | 0.0147 | 0.98854 | 0.993 | -6.57 | 0.23124 | none |
| LEUTX    | -0.001 | -0.0011 | -0.015 | 0.9886  | 0.993 | -6.57 | 0       | none |
| SMTNL2   | -0.002 | 0.0501  | -0.015 | 0.98866 | 0.993 | -6.57 | 0.66879 | none |
| PMPCB    | 0.002  | -0.0979 | 0.0145 | 0.9887  | 0.993 | -6.57 | 0.69459 | none |
| FAM189A  | -0.004 | 0.0359  | -0.014 | 0.98875 | 0.993 | -6.57 | 1.32176 | none |
| MAP9     | 0.002  | 0.0644  | 0.0144 | 0.98878 | 0.993 | -6.57 | 0.76548 | none |
| DUOXA2   | #####  | 0.0148  | 0.0143 | 0.98886 | 0.993 | -6.57 | 0.38199 | none |
| ANKRD60  | 0.001  | #####   | 0.0142 | 0.98899 | 0.993 | -6.57 | -0.1716 | none |
| CDPF1    | -0.002 | -0.0344 | -0.014 | 0.989   | 0.993 | -6.57 | 1.05521 | none |
| RNASE9   | 0.001  | 0.001   | 0.0138 | 0.98931 | 0.994 | -6.57 | 0       | none |
| TMEM218  | -0.002 | -0.0813 | -0.014 | 0.98944 | 0.994 | -6.57 | 0.35952 | none |
| ZNF512B  | -0.002 | 0.1566  | -0.013 | 0.98999 | 0.994 | -6.57 | 0.71469 | none |
| KLK14    | 0.001  | 0.0054  | 0.0129 | 0.99    | 0.994 | -6.57 | 0.84121 | none |
| CALHM2   | -0.002 | -0.0188 | -0.013 | 0.99009 | 0.994 | -6.57 | 1.52567 | none |
| HACD4    | -0.001 | -0.0816 | -0.013 | 0.99013 | 0.994 | -6.57 | 1.03369 | none |
| RGMB     | -0.002 | -0.0488 | -0.013 | 0.99025 | 0.994 | -6.57 | -0.5163 | none |
| C6ORF52  | 0.002  | -0.0181 | 0.0125 | 0.99029 | 0.994 | -6.57 | 0.60372 | none |
| SDHAF1   | -0.001 | -0.0103 | -0.012 | 0.99045 | 0.994 | -6.57 | 1.12537 | none |
| FOXP2    | 0.006  | -0.0632 | 0.0122 | 0.99048 | 0.994 | -6.57 | -0.2698 | none |
| TRIO     | 0.002  | 0.0847  | 0.0122 | 0.99055 | 0.994 | -6.57 | 0.34107 | none |
| EIF2B5   | 0.001  | 0.052   | 0.0115 | 0.99106 | 0.995 | -6.57 | 0.44911 | none |
| DDX4     | -0.002 | 0.0173  | -0.011 | 0.9911  | 0.995 | -6.57 | 0.23698 | none |
| PIR      | 0.002  | -0.0361 | 0.0114 | 0.99112 | 0.995 | -6.57 | 0.29881 | none |



|          |        |         |        |         |       |       |         |      |
|----------|--------|---------|--------|---------|-------|-------|---------|------|
| PROX2    | -0.002 | 0.0552  | -0.011 | 0.99152 | 0.995 | -6.57 | -0.3411 | none |
| PEX5     | 0.001  | -0.0014 | 0.0105 | 0.99181 | 0.995 | -6.57 | 0.48176 | none |
| SLC17A9  | 0.001  | 0.0504  | 0.01   | 0.99224 | 0.996 | -6.57 | 0.37666 | none |
| YIPF5    | #####  | -0.1108 | -0.01  | 0.99239 | 0.996 | -6.57 | -0.089  | none |
| C19ORF18 | #####  | 0.0078  | -0.01  | 0.99246 | 0.996 | -6.57 | -0.6112 | none |
| DAPK3    | 0.001  | 0.0649  | 0.0096 | 0.99255 | 0.996 | -6.57 | 0.66571 | none |
| EAPP     | 0.001  | -0.0204 | 0.0094 | 0.99272 | 0.996 | -6.57 | 0.92823 | none |
| OR5B17   | #####  |         | -0.009 | 0.99273 | 0.996 | -6.57 | 1.86247 | none |
| VEZF1    | 0.002  | 0.1141  | 0.0092 | 0.99285 | 0.996 | -6.57 | 1.49428 | none |
| IFI44L   | #####  | -0.0432 | -0.009 | 0.99294 | 0.996 | -6.57 | 0.8697  | none |
| LAD1     | -0.001 | -0.0596 | -0.009 | 0.99328 | 0.996 | -6.57 | 0.47547 | none |
| EMC3     | #####  | -0.0597 | 0.0086 | 0.99332 | 0.996 | -6.57 | 0.16298 | none |
| ITGA11   | -0.001 | -0.0433 | -0.009 | 0.99334 | 0.996 | -6.57 | -0.3356 | none |
| SPDYA    | 0.002  | -0.0474 | 0.0085 | 0.9934  | 0.996 | -6.57 | 0.92049 | none |
| TNFRSF11 | -0.001 | 0.0419  | -0.008 | 0.99348 | 0.996 | -6.57 | -0.3877 | none |
| C18ORF32 | 0.001  | -0.078  | 0.0084 | 0.99348 | 0.996 | -6.57 | 0.83993 | none |
| RAB3IP   | 0.001  | 0.003   | 0.0079 | 0.99387 | 0.996 | -6.57 | 0.65787 | none |
| HHATL    | #####  |         | -0.008 | 0.99412 | 0.997 | -6.57 | 0.08831 | none |
| VAMP5    | -0.002 | -0.1049 | -0.008 | 0.99414 | 0.997 | -6.57 | 0.20287 | none |
| USP41    | -0.002 | 0.0383  | -0.007 | 0.99429 | 0.997 | -6.57 | 0.08808 | none |
| BLCAP    | -0.001 | -0.0531 | -0.007 | 0.99458 | 0.997 | -6.57 | 0.51343 | none |
| RAB35    | -0.001 | 0.0035  | -0.007 | 0.99466 | 0.997 | -6.57 | 1.49945 | none |
| ELFN2    | #####  | 0.0228  | 0.0067 | 0.99481 | 0.997 | -6.57 | 0.53584 | none |
| DAP      | #####  | 0.0855  | 0.0067 | 0.99483 | 0.997 | -6.57 | 1.18571 | none |
| TSPAN15  | -0.001 | -0.0167 | -0.007 | 0.99492 | 0.997 | -6.57 | 0.73594 | none |
| SAMD9L   | 0.002  | 0.1398  | 0.0063 | 0.99513 | 0.997 | -6.57 | 0.90948 | none |
| RUBCNL   | #####  | -0.004  | -0.006 | 0.99515 | 0.997 | -6.57 | 0.7253  | none |
| AMBP     | #####  | -0.0114 | 0.0061 | 0.99529 | 0.997 | -6.57 | -0.0655 | none |
| CYP2A13  | #####  | -0.0021 | 0.006  | 0.99533 | 0.997 | -6.57 | 0.52924 | none |
| ACCSL    | #####  | 0.0104  | 0.006  | 0.99533 | 0.997 | -6.57 | 0       | none |
| FGFR1OP2 | #####  | -0.0619 | 0.0059 | 0.99539 | 0.997 | -6.57 | -0.064  | none |
| DLX6     | #####  |         | 0.0059 | 0.99545 | 0.997 | -6.57 | 1.49553 | none |
| CPZ      | #####  |         | 0.0055 | 0.99572 | 0.997 | -6.57 | 0.70486 | none |
| TIMP4    | #####  | -0.0083 | -0.005 | 0.99583 | 0.997 | -6.57 | -0.7972 | none |
| DNAH6    | #####  | -0.0013 | -0.005 | 0.99584 | 0.997 | -6.57 | -0.5819 | none |
| CPNE4    | #####  | 0.0063  | 0.0053 | 0.99584 | 0.997 | -6.57 | -0.3444 | none |
| CES5A    | #####  |         | 0.0053 | 0.99591 | 0.997 | -6.57 | 1.88661 | none |
| ATG4C    | #####  | -0.0506 | -0.005 | 0.99607 | 0.997 | -6.57 | 0.76732 | none |
| POP1     | 0.001  | 0.1284  | 0.0047 | 0.99636 | 0.998 | -6.57 | 1.08876 | none |
| ECE2     | #####  | -0.0015 | -0.005 | 0.99649 | 0.998 | -6.57 | 1.91482 | none |

|           |       |         |        |         |       |       |         |      |
|-----------|-------|---------|--------|---------|-------|-------|---------|------|
| UFL1      | ##### | 0.0777  | -0.004 | 0.9969  | 0.998 | -6.57 | 1.82433 | none |
| RHOH      | ##### | -0.0903 | -0.004 | 0.99706 | 0.998 | -6.57 | 1.52253 | none |
| PDCD1LG2  | ##### | -0.0095 | 0.0033 | 0.9974  | 0.998 | -6.57 | -0.1608 | none |
| LTB4R2    | ##### | 0.0664  | -0.003 | 0.99749 | 0.998 | -6.57 | 1.02443 | none |
| HIST1H2BI | ##### | -0.0378 | -0.003 | 0.99752 | 0.998 | -6.57 | 1.31884 | none |
| FGFR1OP   | ##### | -0.0251 | 0.0031 | 0.99762 | 0.998 | -6.57 | -0.3969 | none |
| NUDT7     | ##### | -0.1301 | 0.003  | 0.9977  | 0.998 | -6.57 | -0.2651 | none |
| ZDHC6     | ##### | -0.0451 | -0.003 | 0.99795 | 0.999 | -6.57 | 1.80803 | none |
| PFN3      | ##### | 0.0217  | -0.003 | 0.99798 | 0.999 | -6.57 | 0.8171  | none |
| SPATA6    | ##### | 0.024   | 0.0025 | 0.99809 | 0.999 | -6.57 | 0.80493 | none |
| TFCP2L1   | ##### | 0.0042  | -0.002 | 0.99813 | 0.999 | -6.57 | -0.3323 | none |
| TRIP6     | ##### | 0.0477  | 0.002  | 0.99844 | 0.999 | -6.57 | 1.0276  | none |
| CFAP53    | ##### | 0.035   | -0.002 | 0.99854 | 0.999 | -6.57 | 0.05329 | none |
| TCEAL4    | ##### | 0.0784  | -0.001 | 0.99889 | 0.999 | -6.57 | 0.94028 | none |
| PLD4      | ##### | -0.0374 | -0.001 | 0.99917 | 0.999 | -6.57 | -0.2756 | none |
| RFK       | ##### | -0.0851 | #####  | 0.99933 | 1     | -6.57 | 0.95739 | none |
| ALPL      | ##### | #####   | #####  | 0.99943 | 1     | -6.57 | 0.531   | none |
| MCM5      | ##### | 0.0697  | #####  | 0.99957 | 1     | -6.57 | 0.52896 | none |
| EGF       | ##### | -0.0099 | #####  | 0.99989 | 1     | -6.57 | 0.90435 | none |
| AC010642  | ##### | 0.0167  | #####  | 0.99996 | 1     | -6.57 | -0.7617 | none |

**Supplementary Table 2. Transcriptomic signature of oleic- vs. arachidonic acid stimuli.** Results of the two analyses described for the bulk RNA data to characterize the differential effect of the two fatty acids. PC1-based analysis determines whether genes belong to the oleic acid module, arachidonic acid module, or none (column “PC1 gene module”) based on PC1 loading described in the text. The other columns describe the results of a limma-based moderated t-test for the intercept of the described linear model (p-values adjusted with the Benjamini-Hochberg procedure).

**Supplementary Table 3. Donor demographics for single cell sequencing of blood and adipose T<sub>regs</sub>.**

|         | Age | Height (cm) | Weight (kg) | BMI   | Gender | Last DMT or steroid                            | Date Collected | Date Sequenced |
|---------|-----|-------------|-------------|-------|--------|------------------------------------------------|----------------|----------------|
| Healthy | 54  | 152.0       | 68.0        | 29.43 | F      | N/A                                            | 3-3-17         | 6-11-18        |
|         | 48  | 157.0       | 55.0        | 22.31 | F      | N/A                                            | 7-21-17        | 2-17-18        |
|         | 46  | 158.0       | 62.0        | 24.84 | F      | N/A                                            | 3-17-17        | 3-5-18         |
|         | 64  | 171.        | 82.0        | 28.04 | M      | N/A                                            | 10-5-16        | 4-25-18        |
|         | 31  | 163.0       | 72.0        | 27.10 | F      | N/A                                            | 10-5-16        | 4-25-18        |
|         | 38  | 155.0       | 57.0        | 23.73 | F      | N/A                                            | 5-19-17        | 3-8-18         |
|         | 23  | 167.0       | 61.0        | 21.87 | F      | N/A                                            | 10-20-16       | 6-8-18         |
|         | 23  | 163.0       | 55.0        | 20.70 | F      | N/A                                            | 10-20-16       | 6-8-18         |
| RRMS    | 47  | 167.0       | 102.0       | 36.57 | F      | No previous history                            | 3-17-17        | 6-11-18        |
|         | 60  | 175.0       | 84.0        | 27.43 | M      | No history since 11-2015                       | 3-17-17        | 6-11-18        |
|         | 57  | 161.0       | 61.0        | 23.53 | F      | DMT Avonex 10-1-05, oral steroids 6-2013       | 3-3-17         | 5-15-18        |
|         | 49  | 172.0       | 91.0        | 30.76 | F      | DMT Tecfidera 9-1-14, oral Prednisone 1-24-17  | 3-3-17         | 5-15-18        |
|         | 52  | 171.0       | 68.0        | 23.26 | F      | DMT Avonex in 2000                             | 3-31-17        | 3-5-18         |
|         | 56  | 178.0       | 99.0        | 31.25 | F      | DMT (Avonex, Copaxone, other) and IVMP in 2004 | 5-11-17        | 6-11-18        |
|         | 35  | 152.0       | 60.0        | 25.97 | F      | DMT Tecfidera 10-2016                          | 5-19-17        | 3-8-18         |
|         | 37  | 152.0       | 86.0        | 37.22 | F      | DMT Tecfidera 5-2015                           | 5-24-17        | 2-27-18        |

**Supplementary Table 3. Donor demographics for mass spectrometry and single cell sequencing of blood and adipose T<sub>regs</sub>.** Age, height, weight, body mass index (BMI), gender, and disease modifying treatment (DMT) information for healthy and MS subjects. Collection and processing dates are also shown. These donors donated both blood and adipose tissue from which T<sub>reg</sub> cells were sorted and single cell sequenced, and blood plasma and fat supernatant were analyzed by mass spectrometry for concentrations of long chain fatty acids.

**Supplementary Table 4. Differentially expressed genes between healthy and MS donors.**

| symbol    | p_val    | avg_logFC | pct.1 | pct.2 | p_val_adj | comparison     |
|-----------|----------|-----------|-------|-------|-----------|----------------|
| PPDPF     | 4.51E-18 | 1.39767   | 0.514 | 0.21  | 7.20E-14  | HC_vs_MS.Trt_F |
| ZFP36     | 6.30E-15 | 1.38737   | 0.673 | 0.41  | 1.01E-10  | HC_vs_MS.Trt_F |
| KPNA5     | 8.25E-15 | 0.65223   | 0.997 | 0.93  | 1.32E-10  | HC_vs_MS.Trt_F |
| CD3G      | 8.43E-15 | -1.0509   | 0.931 | 0.95  | 1.35E-10  | HC_vs_MS.Trt_F |
| SAMD12    | 3.12E-14 | 0.632     | 0.994 | 0.94  | 4.98E-10  | HC_vs_MS.Trt_F |
| MORC4     | 8.59E-14 | 0.46891   | 1     | 0.99  | 1.37E-09  | HC_vs_MS.Trt_F |
| RGPD5     | 1.31E-13 | 0.84279   | 0.919 | 0.8   | 2.08E-09  | HC_vs_MS.Trt_F |
| MTRNR2L8  | 1.31E-13 | 0.43007   | 1     | 0.98  | 2.09E-09  | HC_vs_MS.Trt_F |
| C1orf56   | 5.95E-13 | -0.8723   | 0.78  | 0.84  | 9.50E-09  | HC_vs_MS.Trt_F |
| CFAP54    | 8.58E-13 | 0.66482   | 0.965 | 0.91  | 1.37E-08  | HC_vs_MS.Trt_F |
| MTRNR2L4  | 1.95E-12 | 0.46609   | 0.991 | 0.92  | 3.12E-08  | HC_vs_MS.Trt_F |
| ABLIM3    | 3.31E-12 | 2.48814   | 0.275 | 0.07  | 5.28E-08  | HC_vs_MS.Trt_F |
| MTRNR2L1  | 4.69E-12 | 0.40295   | 1     | 0.98  | 7.48E-08  | HC_vs_MS.Trt_F |
| S100A4    | 1.41E-11 | 0.68977   | 0.757 | 0.55  | 2.25E-07  | HC_vs_MS.Trt_F |
| MTRNR2L12 | 2.03E-11 | 0.35167   | 1     | 1     | 3.25E-07  | HC_vs_MS.Trt_F |
| TAC4      | 2.22E-11 | 0.89018   | 0.754 | 0.56  | 3.55E-07  | HC_vs_MS.Trt_F |
| SPATA4    | 2.62E-11 | 0.74843   | 0.72  | 0.47  | 4.18E-07  | HC_vs_MS.Trt_F |
| PBX1      | 3.70E-11 | 0.85305   | 0.934 | 0.88  | 5.91E-07  | HC_vs_MS.Trt_F |
| CYSLTR1   | 4.89E-11 | 0.57611   | 0.98  | 0.88  | 7.81E-07  | HC_vs_MS.Trt_F |
| YLPM1     | 1.21E-10 | 0.6931    | 0.749 | 0.54  | 1.94E-06  | HC_vs_MS.Trt_F |
| C4orf32   | 1.76E-10 | 0.43457   | 0.994 | 0.97  | 2.81E-06  | HC_vs_MS.Trt_F |
| HNRNPH1   | 1.98E-10 | -0.7629   | 0.991 | 0.99  | 3.16E-06  | HC_vs_MS.Trt_F |
| MYADM     | 4.25E-10 | 0.96205   | 0.867 | 0.72  | 6.79E-06  | HC_vs_MS.Trt_F |
| AHNAK     | 4.38E-10 | 0.7165    | 0.89  | 0.76  | 7.00E-06  | HC_vs_MS.Trt_F |
| LMNA      | 4.84E-10 | 1.13869   | 0.801 | 0.65  | 7.72E-06  | HC_vs_MS.Trt_F |
| BLOC1S6   | 5.57E-10 | 0.58013   | 0.997 | 0.98  | 8.90E-06  | HC_vs_MS.Trt_F |
| C6orf62   | 6.04E-10 | -0.8343   | 0.737 | 0.84  | 9.65E-06  | HC_vs_MS.Trt_F |
| MTRNR2L10 | 8.07E-10 | 0.40013   | 0.98  | 0.89  | 1.29E-05  | HC_vs_MS.Trt_F |
| VIM       | 9.05E-10 | 0.55635   | 0.893 | 0.77  | 1.45E-05  | HC_vs_MS.Trt_F |
| DDX39B    | 1.14E-09 | 0.69991   | 0.783 | 0.57  | 1.83E-05  | HC_vs_MS.Trt_F |
| ZNF331    | 1.34E-09 | 1.37356   | 0.757 | 0.62  | 2.14E-05  | HC_vs_MS.Trt_F |
| RPS14     | 1.45E-09 | -0.5438   | 0.908 | 0.96  | 2.32E-05  | HC_vs_MS.Trt_F |
| MARVELD2  | 1.51E-09 | 0.75116   | 0.725 | 0.54  | 2.41E-05  | HC_vs_MS.Trt_F |
| TNFAIP3   | 1.63E-09 | 0.90209   | 0.633 | 0.42  | 2.61E-05  | HC_vs_MS.Trt_F |
| IDS       | 1.65E-09 | 0.60789   | 0.879 | 0.75  | 2.64E-05  | HC_vs_MS.Trt_F |
| CLDN5     | 1.76E-09 | 0.97152   | 0.208 | 0.05  | 2.81E-05  | HC_vs_MS.Trt_F |
| LENG8     | 2.45E-09 | 0.73209   | 0.777 | 0.58  | 3.92E-05  | HC_vs_MS.Trt_F |
| MTRNR2L6  | 2.96E-09 | 0.39456   | 0.983 | 0.9   | 4.72E-05  | HC_vs_MS.Trt_F |
| TMEM45A   | 3.08E-09 | 0.3743    | 1     | 0.97  | 4.91E-05  | HC_vs_MS.Trt_F |

|             |          |         |       |      |          |                |
|-------------|----------|---------|-------|------|----------|----------------|
| TBC1D8B     | 3.99E-09 | 0.54708 | 0.965 | 0.85 | 6.37E-05 | HC_vs_MS.Trt_F |
| C16orf54    | 6.16E-09 | -1.0807 | 0.737 | 0.8  | 9.84E-05 | HC_vs_MS.Trt_F |
| HACD3       | 6.32E-09 | 0.38235 | 0.821 | 0.67 | 1.01E-04 | HC_vs_MS.Trt_F |
| PCSK5       | 9.86E-09 | 1.06097 | 0.994 | 0.93 | 1.57E-04 | HC_vs_MS.Trt_F |
| EFNA5       | 1.10E-08 | 0.50042 | 0.54  | 0.32 | 1.75E-04 | HC_vs_MS.Trt_F |
| RANBP2      | 1.36E-08 | 0.67177 | 0.592 | 0.35 | 2.16E-04 | HC_vs_MS.Trt_F |
| TMSB4X      | 1.37E-08 | -0.3143 | 0.974 | 1    | 2.18E-04 | HC_vs_MS.Trt_F |
| CTTN        | 1.90E-08 | 0.79778 | 0.295 | 0.11 | 3.03E-04 | HC_vs_MS.Trt_F |
| KIAA1161    | 1.97E-08 | 0.50813 | 0.876 | 0.71 | 3.15E-04 | HC_vs_MS.Trt_F |
| CD69        | 1.99E-08 | 1.02523 | 0.494 | 0.28 | 3.18E-04 | HC_vs_MS.Trt_F |
| RGS1        | 2.29E-08 | 0.73001 | 0.575 | 0.36 | 3.65E-04 | HC_vs_MS.Trt_F |
| RPL3        | 2.44E-08 | -0.4    | 0.936 | 0.96 | 3.90E-04 | HC_vs_MS.Trt_F |
| DNTTIP2     | 2.89E-08 | 0.4512  | 0.96  | 0.88 | 4.61E-04 | HC_vs_MS.Trt_F |
| SULT1B1     | 2.93E-08 | 0.38038 | 0.988 | 0.9  | 4.68E-04 | HC_vs_MS.Trt_F |
| MTRNR2L11   | 3.12E-08 | 0.36627 | 0.974 | 0.89 | 4.98E-04 | HC_vs_MS.Trt_F |
| FGF13       | 3.40E-08 | 0.62617 | 0.968 | 0.92 | 5.43E-04 | HC_vs_MS.Trt_F |
| FSIP2       | 3.65E-08 | 0.53696 | 0.847 | 0.64 | 5.83E-04 | HC_vs_MS.Trt_F |
| PRRG3       | 3.81E-08 | 1.48051 | 0.737 | 0.59 | 6.08E-04 | HC_vs_MS.Trt_F |
| NR4A2       | 3.82E-08 | 0.7098  | 0.607 | 0.4  | 6.10E-04 | HC_vs_MS.Trt_F |
| CSRNP1      | 4.51E-08 | 1.53656 | 0.327 | 0.15 | 7.20E-04 | HC_vs_MS.Trt_F |
| ATXN10      | 6.12E-08 | 0.48979 | 0.587 | 0.36 | 9.77E-04 | HC_vs_MS.Trt_F |
| HLA-A       | 7.95E-08 | 0.43362 | 0.899 | 0.75 | 0.001269 | HC_vs_MS.Trt_F |
| FTH1        | 7.95E-08 | 0.42519 | 0.882 | 0.74 | 0.001271 | HC_vs_MS.Trt_F |
| VWF         | 8.43E-08 | 1.45704 | 0.237 | 0.08 | 0.001346 | HC_vs_MS.Trt_F |
| SAMSN1      | 8.51E-08 | 0.44882 | 0.555 | 0.33 | 0.00136  | HC_vs_MS.Trt_F |
| SPP2        | 8.83E-08 | 0.51831 | 0.809 | 0.63 | 0.00141  | HC_vs_MS.Trt_F |
| SF1         | 1.19E-07 | 0.9421  | 0.604 | 0.42 | 0.001908 | HC_vs_MS.Trt_F |
| CA4         | 1.31E-07 | 0.56693 | 0.211 | 0.07 | 0.002087 | HC_vs_MS.Trt_F |
| MT-CO2      | 1.39E-07 | -0.5155 | 0.983 | 1    | 0.00222  | HC_vs_MS.Trt_F |
| FOS         | 1.43E-07 | 1.15091 | 0.451 | 0.27 | 0.002288 | HC_vs_MS.Trt_F |
| RP11-47I22. | 1.50E-07 | 0.49949 | 0.679 | 0.48 | 0.002393 | HC_vs_MS.Trt_F |
| SLTM        | 1.69E-07 | 0.52324 | 0.471 | 0.27 | 0.0027   | HC_vs_MS.Trt_F |
| SP100       | 1.92E-07 | 0.42329 | 0.986 | 0.89 | 0.003071 | HC_vs_MS.Trt_F |
| SHISA9      | 1.95E-07 | 0.30713 | 0.971 | 0.91 | 0.003117 | HC_vs_MS.Trt_F |
| INTU        | 2.15E-07 | 0.38785 | 0.991 | 0.98 | 0.003429 | HC_vs_MS.Trt_F |
| EPAS1       | 2.49E-07 | 0.76425 | 0.272 | 0.11 | 0.003975 | HC_vs_MS.Trt_F |
| 4-Sep       | 2.50E-07 | 0.54357 | 0.529 | 0.33 | 0.004    | HC_vs_MS.Trt_F |
| MDN1        | 2.85E-07 | 0.85257 | 0.324 | 0.15 | 0.004553 | HC_vs_MS.Trt_F |
| CHMP1B      | 2.89E-07 | 0.39318 | 0.855 | 0.69 | 0.004616 | HC_vs_MS.Trt_F |
| KYNU        | 3.15E-07 | 0.3313  | 0.983 | 0.96 | 0.005038 | HC_vs_MS.Trt_F |

|          |          |         |       |      |          |                |
|----------|----------|---------|-------|------|----------|----------------|
| ITGB3BP  | 3.33E-07 | 0.69368 | 0.78  | 0.67 | 0.005318 | HC_vs_MS.Trt_F |
| UGGT2    | 3.48E-07 | 0.44272 | 0.908 | 0.81 | 0.005557 | HC_vs_MS.Trt_F |
| SET      | 3.48E-07 | -0.7544 | 0.829 | 0.87 | 0.005563 | HC_vs_MS.Trt_F |
| MAPK10   | 3.86E-07 | 0.82169 | 0.332 | 0.16 | 0.006172 | HC_vs_MS.Trt_F |
| NCOR2    | 3.91E-07 | 0.92636 | 0.552 | 0.36 | 0.006248 | HC_vs_MS.Trt_F |
| HSPG2    | 3.92E-07 | 1.4607  | 0.535 | 0.34 | 0.006258 | HC_vs_MS.Trt_F |
| RGPD6    | 3.94E-07 | 0.79423 | 0.685 | 0.52 | 0.006297 | HC_vs_MS.Trt_F |
| RPL34    | 4.04E-07 | -0.5355 | 0.942 | 0.95 | 0.006448 | HC_vs_MS.Trt_F |
| FMNL2    | 4.10E-07 | 0.66786 | 0.347 | 0.17 | 0.006543 | HC_vs_MS.Trt_F |
| SMCHD1   | 4.44E-07 | 0.62513 | 0.789 | 0.61 | 0.007099 | HC_vs_MS.Trt_F |
| CAPZA1   | 5.05E-07 | -0.8277 | 0.818 | 0.86 | 0.008074 | HC_vs_MS.Trt_F |
| TAGLN2   | 5.18E-07 | 0.50487 | 0.653 | 0.47 | 0.008267 | HC_vs_MS.Trt_F |
| SLAMF1   | 5.21E-07 | 0.74902 | 0.405 | 0.22 | 0.008322 | HC_vs_MS.Trt_F |
| TAP2     | 5.82E-07 | 0.31916 | 0.379 | 0.18 | 0.009302 | HC_vs_MS.Trt_F |
| MIPOL1   | 6.00E-07 | 0.35822 | 1     | 0.99 | 0.009579 | HC_vs_MS.Trt_F |
| RAPGEF5  | 8.57E-07 | 1.07041 | 0.101 | 0.01 | 0.013685 | HC_vs_MS.Trt_F |
| CRLS1    | 1.06E-06 | 0.38585 | 0.483 | 0.29 | 0.016867 | HC_vs_MS.Trt_F |
| HLA-B    | 1.10E-06 | 0.43869 | 0.919 | 0.88 | 0.017624 | HC_vs_MS.Trt_F |
| SPARC    | 1.30E-06 | 0.5166  | 0.249 | 0.1  | 0.02072  | HC_vs_MS.Trt_F |
| NEDD4    | 1.39E-06 | 0.47142 | 0.983 | 0.93 | 0.022188 | HC_vs_MS.Trt_F |
| LTBR     | 1.40E-06 | 0.41181 | 0.951 | 0.88 | 0.022377 | HC_vs_MS.Trt_F |
| LGALS3BP | 1.53E-06 | 1.18501 | 0.711 | 0.5  | 0.02441  | HC_vs_MS.Trt_F |
| RPS3A    | 1.56E-06 | -0.434  | 0.882 | 0.92 | 0.02489  | HC_vs_MS.Trt_F |
| C10orf11 | 1.66E-06 | 0.41365 | 0.986 | 0.97 | 0.026472 | HC_vs_MS.Trt_F |
| SLC2A3   | 1.90E-06 | 0.52054 | 0.908 | 0.85 | 0.030377 | HC_vs_MS.Trt_F |
| ARHGAP9  | 2.01E-06 | 0.36953 | 0.624 | 0.46 | 0.032134 | HC_vs_MS.Trt_F |
| XRCC2    | 2.14E-06 | 0.46726 | 0.858 | 0.73 | 0.034235 | HC_vs_MS.Trt_F |
| GNG11    | 2.15E-06 | 0.79775 | 0.136 | 0.03 | 0.03434  | HC_vs_MS.Trt_F |
| LPP      | 2.16E-06 | 0.81429 | 0.988 | 0.96 | 0.034507 | HC_vs_MS.Trt_F |
| ADGRE2   | 2.48E-06 | 0.89021 | 0.855 | 0.72 | 0.039629 | HC_vs_MS.Trt_F |
| SLC25A44 | 2.53E-06 | -0.3452 | 0.754 | 0.59 | 0.040339 | HC_vs_MS.Trt_F |
| GPR146   | 2.57E-06 | 0.63303 | 0.237 | 0.09 | 0.041086 | HC_vs_MS.Trt_F |
| CCNH     | 2.58E-06 | 0.38031 | 0.405 | 0.22 | 0.041263 | HC_vs_MS.Trt_F |
| ACIN1    | 2.67E-06 | 0.79016 | 0.633 | 0.46 | 0.042595 | HC_vs_MS.Trt_F |
| BUB1B    | 2.67E-06 | -0.6924 | 0.448 | 0.27 | 0.042726 | HC_vs_MS.Trt_F |
| KIAA1462 | 2.70E-06 | 0.79406 | 0.39  | 0.22 | 0.043122 | HC_vs_MS.Trt_F |
| LDLRAD4  | 2.82E-06 | 0.78667 | 0.538 | 0.35 | 0.044973 | HC_vs_MS.Trt_F |
| USP36    | 2.84E-06 | 0.63745 | 0.535 | 0.35 | 0.045303 | HC_vs_MS.Trt_F |
| C4orf36  | 2.98E-06 | 0.39958 | 0.908 | 0.82 | 0.047554 | HC_vs_MS.Trt_F |
| EPPIN    | 3.10E-06 | 0.45402 | 0.627 | 0.43 | 0.049478 | HC_vs_MS.Trt_F |

|          |          |         |       |      |          |                |
|----------|----------|---------|-------|------|----------|----------------|
| SRGN     | 3.22E-06 | 0.50072 | 0.642 | 0.47 | 0.051396 | HC_vs_MS.Trt_F |
| ENG      | 3.46E-06 | 0.72706 | 0.205 | 0.08 | 0.055328 | HC_vs_MS.Trt_F |
| RBBP6    | 3.47E-06 | 0.53152 | 0.327 | 0.15 | 0.055363 | HC_vs_MS.Trt_F |
| LRRK1    | 3.50E-06 | 0.4604  | 0.85  | 0.73 | 0.055979 | HC_vs_MS.Trt_F |
| MPZL3    | 3.87E-06 | 0.98561 | 0.743 | 0.63 | 0.06189  | HC_vs_MS.Trt_F |
| FAM213A  | 4.35E-06 | 0.25107 | 0.893 | 0.77 | 0.069551 | HC_vs_MS.Trt_F |
| SLC44A5  | 4.70E-06 | -0.4655 | 0.749 | 0.82 | 0.075127 | HC_vs_MS.Trt_F |
| ANXA1    | 4.91E-06 | 0.93667 | 0.422 | 0.27 | 0.078419 | HC_vs_MS.Trt_F |
| GRB10    | 4.96E-06 | 1.25803 | 0.341 | 0.18 | 0.079196 | HC_vs_MS.Trt_F |
| PARP15   | 6.02E-06 | 0.52331 | 0.942 | 0.85 | 0.096109 | HC_vs_MS.Trt_F |
| ENTPD1   | 6.04E-06 | 0.3018  | 0.971 | 0.94 | 0.096521 | HC_vs_MS.Trt_F |
| TCF4     | 6.43E-06 | 0.40243 | 0.818 | 0.67 | 0.102785 | HC_vs_MS.Trt_F |
| SUPT5H   | 6.94E-06 | 1.09069 | 0.538 | 0.36 | 0.110909 | HC_vs_MS.Trt_F |
| MECP2    | 7.20E-06 | 0.647   | 0.962 | 0.92 | 0.115046 | HC_vs_MS.Trt_F |
| PPP1CB   | 7.36E-06 | -0.9109 | 0.749 | 0.85 | 0.117557 | HC_vs_MS.Trt_F |
| ARHGAP45 | 8.21E-06 | -0.6041 | 0.61  | 0.72 | 0.131183 | HC_vs_MS.Trt_F |
| KLF6     | 9.15E-06 | 0.52982 | 0.798 | 0.68 | 0.146162 | HC_vs_MS.Trt_F |
| TNFSF13B | 9.53E-06 | -0.3068 | 0.642 | 0.45 | 0.152285 | HC_vs_MS.Trt_F |
| APELA    | 9.88E-06 | 0.27529 | 0.431 | 0.26 | 0.157874 | HC_vs_MS.Trt_F |
| TRERF1   | 1.01E-05 | 1.16229 | 0.251 | 0.11 | 0.16141  | HC_vs_MS.Trt_F |
| NAMPT    | 1.02E-05 | 0.69761 | 0.824 | 0.72 | 0.16255  | HC_vs_MS.Trt_F |
| UBC      | 1.02E-05 | 0.50061 | 0.578 | 0.38 | 0.162884 | HC_vs_MS.Trt_F |
| RABGAP1L | 1.03E-05 | 0.5176  | 0.913 | 0.84 | 0.164461 | HC_vs_MS.Trt_F |
| PER1     | 1.06E-05 | 1.13996 | 0.587 | 0.45 | 0.169791 | HC_vs_MS.Trt_F |
| NRBP1    | 1.11E-05 | 0.65105 | 0.668 | 0.5  | 0.177577 | HC_vs_MS.Trt_F |
| PLA2G7   | 1.13E-05 | 0.62962 | 0.647 | 0.48 | 0.180137 | HC_vs_MS.Trt_F |
| SIM1     | 1.16E-05 | -0.8331 | 0.312 | 0.16 | 0.184786 | HC_vs_MS.Trt_F |
| TATDN1   | 1.18E-05 | 1.28813 | 0.783 | 0.64 | 0.188682 | HC_vs_MS.Trt_F |
| TSKU     | 1.27E-05 | 0.72597 | 0.587 | 0.41 | 0.202726 | HC_vs_MS.Trt_F |
| CYB5R4   | 1.28E-05 | 0.44423 | 0.922 | 0.89 | 0.203681 | HC_vs_MS.Trt_F |
| RAB12    | 1.34E-05 | 1.54462 | 0.361 | 0.23 | 0.21412  | HC_vs_MS.Trt_F |
| SFN      | 1.42E-05 | 0.85476 | 0.353 | 0.21 | 0.227472 | HC_vs_MS.Trt_F |
| CRIP2    | 1.44E-05 | 0.40946 | 0.275 | 0.13 | 0.230562 | HC_vs_MS.Trt_F |
| CERCAM   | 1.45E-05 | 0.34971 | 0.988 | 0.97 | 0.232175 | HC_vs_MS.Trt_F |
| REV3L    | 1.47E-05 | 0.5803  | 0.74  | 0.6  | 0.234909 | HC_vs_MS.Trt_F |
| HPGD     | 1.48E-05 | 0.83168 | 0.275 | 0.13 | 0.236926 | HC_vs_MS.Trt_F |
| ROBO1    | 1.60E-05 | -0.2656 | 0.512 | 0.65 | 0.255595 | HC_vs_MS.Trt_F |
| ASTN2    | 1.68E-05 | 0.38864 | 0.977 | 0.87 | 0.269136 | HC_vs_MS.Trt_F |
| NOTCH2NL | 1.69E-05 | 1.28183 | 0.292 | 0.15 | 0.270017 | HC_vs_MS.Trt_F |
| SRRM2    | 1.77E-05 | 0.4522  | 0.754 | 0.61 | 0.282329 | HC_vs_MS.Trt_F |

|            |          |         |       |      |          |                |
|------------|----------|---------|-------|------|----------|----------------|
| PYGL       | 1.80E-05 | 0.54057 | 0.884 | 0.82 | 0.286992 | HC_vs_MS.Trt_F |
| SNRNP70    | 1.83E-05 | 1.06663 | 0.329 | 0.18 | 0.291831 | HC_vs_MS.Trt_F |
| HNRNPC     | 1.90E-05 | 0.30073 | 0.809 | 0.69 | 0.303345 | HC_vs_MS.Trt_F |
| PI4KA      | 1.94E-05 | 0.68604 | 0.373 | 0.22 | 0.309825 | HC_vs_MS.Trt_F |
| TNS1       | 1.95E-05 | 2.1413  | 0.39  | 0.23 | 0.311364 | HC_vs_MS.Trt_F |
| WISP2      | 1.96E-05 | -0.42   | 0.685 | 0.51 | 0.312504 | HC_vs_MS.Trt_F |
| CFAP69     | 2.00E-05 | 0.35998 | 0.873 | 0.75 | 0.319728 | HC_vs_MS.Trt_F |
| BST2       | 2.04E-05 | 0.59272 | 0.309 | 0.16 | 0.325483 | HC_vs_MS.Trt_F |
| FRYL       | 2.07E-05 | 0.49264 | 0.792 | 0.67 | 0.330343 | HC_vs_MS.Trt_F |
| REL        | 2.08E-05 | 0.28813 | 0.983 | 0.96 | 0.33174  | HC_vs_MS.Trt_F |
| MYCBPAP    | 2.08E-05 | 0.28888 | 0.922 | 0.79 | 0.332533 | HC_vs_MS.Trt_F |
| LTBP1      | 2.17E-05 | 0.75673 | 0.107 | 0.02 | 0.34585  | HC_vs_MS.Trt_F |
| FRK        | 2.24E-05 | 0.30463 | 0.997 | 0.98 | 0.357732 | HC_vs_MS.Trt_F |
| SOD2       | 2.29E-05 | 0.27071 | 1     | 1    | 0.365375 | HC_vs_MS.Trt_F |
| TF         | 2.39E-05 | 0.31595 | 0.942 | 0.89 | 0.381825 | HC_vs_MS.Trt_F |
| WNK1       | 2.51E-05 | 0.66007 | 0.613 | 0.46 | 0.400697 | HC_vs_MS.Trt_F |
| VPS13C     | 2.52E-05 | 0.725   | 0.838 | 0.72 | 0.401892 | HC_vs_MS.Trt_F |
| CYP4F11    | 2.63E-05 | 0.32061 | 0.46  | 0.3  | 0.420584 | HC_vs_MS.Trt_F |
| RIMS1      | 2.69E-05 | 0.52826 | 0.361 | 0.21 | 0.430432 | HC_vs_MS.Trt_F |
| MBNL1      | 2.71E-05 | 0.26728 | 0.899 | 0.75 | 0.432485 | HC_vs_MS.Trt_F |
| CATIP      | 2.71E-05 | -0.3282 | 0.882 | 0.89 | 0.432969 | HC_vs_MS.Trt_F |
| ZNF670-ZNF | 2.85E-05 | 0.51463 | 0.671 | 0.51 | 0.455831 | HC_vs_MS.Trt_F |
| PTPN2      | 3.05E-05 | 0.59668 | 0.997 | 0.96 | 0.486402 | HC_vs_MS.Trt_F |
| TTLL5      | 3.10E-05 | 0.51589 | 0.749 | 0.59 | 0.495872 | HC_vs_MS.Trt_F |
| MAML2      | 3.11E-05 | 1.54641 | 0.272 | 0.14 | 0.497368 | HC_vs_MS.Trt_F |
| TSPAN3     | 3.27E-05 | 0.61905 | 0.529 | 0.35 | 0.522271 | HC_vs_MS.Trt_F |
| JAK3       | 3.51E-05 | -0.6274 | 0.731 | 0.81 | 0.560742 | HC_vs_MS.Trt_F |
| PDE4D      | 3.76E-05 | 0.47707 | 0.405 | 0.25 | 0.600095 | HC_vs_MS.Trt_F |
| WTIP       | 3.88E-05 | 0.35429 | 0.986 | 0.94 | 0.620344 | HC_vs_MS.Trt_F |
| BACH2      | 3.97E-05 | 1.13661 | 0.292 | 0.16 | 0.633574 | HC_vs_MS.Trt_F |
| CEP83      | 4.06E-05 | 0.83509 | 0.754 | 0.65 | 0.648773 | HC_vs_MS.Trt_F |
| IFITM3     | 4.15E-05 | 0.79529 | 0.688 | 0.53 | 0.663174 | HC_vs_MS.Trt_F |
| CABIN1     | 4.24E-05 | 0.98019 | 0.37  | 0.22 | 0.677008 | HC_vs_MS.Trt_F |
| PHTF2      | 4.25E-05 | 0.44227 | 0.552 | 0.37 | 0.679578 | HC_vs_MS.Trt_F |
| RBM12      | 4.27E-05 | 0.55281 | 0.289 | 0.15 | 0.682636 | HC_vs_MS.Trt_F |
| RSRP1      | 4.28E-05 | 0.51437 | 0.945 | 0.91 | 0.683871 | HC_vs_MS.Trt_F |
| MT-ND2     | 4.40E-05 | 0.36241 | 0.908 | 0.84 | 0.702733 | HC_vs_MS.Trt_F |
| KAT6A      | 4.54E-05 | 0.3408  | 0.824 | 0.71 | 0.724671 | HC_vs_MS.Trt_F |
| PRRC2C     | 4.57E-05 | 0.30669 | 0.847 | 0.69 | 0.730333 | HC_vs_MS.Trt_F |
| SH2D2A     | 4.68E-05 | 0.91695 | 0.488 | 0.35 | 0.747459 | HC_vs_MS.Trt_F |



|          |          |         |       |      |          |                |
|----------|----------|---------|-------|------|----------|----------------|
| KRAS     | 4.72E-05 | 0.34394 | 0.483 | 0.32 | 0.753406 | HC_vs_MS.Trt_F |
| BVES     | 4.74E-05 | 0.47164 | 0.772 | 0.64 | 0.756661 | HC_vs_MS.Trt_F |
| CCS      | 4.92E-05 | 0.99786 | 0.329 | 0.18 | 0.786236 | HC_vs_MS.Trt_F |
| HLA-DRB5 | 5.01E-05 | -0.8485 | 0.246 | 0.12 | 0.800537 | HC_vs_MS.Trt_F |
| MTM1     | 5.05E-05 | 0.25591 | 0.228 | 0.1  | 0.807393 | HC_vs_MS.Trt_F |
| NEBL     | 5.10E-05 | 0.45564 | 0.37  | 0.22 | 0.814044 | HC_vs_MS.Trt_F |
| EIF5A    | 5.13E-05 | -0.3259 | 0.575 | 0.71 | 0.819951 | HC_vs_MS.Trt_F |
| HIVEP2   | 5.19E-05 | 1.0312  | 0.382 | 0.23 | 0.828936 | HC_vs_MS.Trt_F |
| SYT17    | 5.28E-05 | 0.34664 | 0.439 | 0.28 | 0.842942 | HC_vs_MS.Trt_F |
| ATP10B   | 5.29E-05 | 0.29962 | 0.824 | 0.69 | 0.845492 | HC_vs_MS.Trt_F |
| LFNG     | 5.36E-05 | 0.69286 | 0.344 | 0.2  | 0.856561 | HC_vs_MS.Trt_F |
| NRP1     | 5.43E-05 | -0.4707 | 0.465 | 0.3  | 0.867556 | HC_vs_MS.Trt_F |
| CCDC171  | 5.46E-05 | 1.34007 | 0.569 | 0.41 | 0.872556 | HC_vs_MS.Trt_F |
| ITGB2    | 5.80E-05 | 0.7408  | 0.685 | 0.58 | 0.925855 | HC_vs_MS.Trt_F |
| TCHP     | 5.86E-05 | 0.50703 | 0.613 | 0.45 | 0.93556  | HC_vs_MS.Trt_F |
| MOV10    | 5.89E-05 | 0.68654 | 0.584 | 0.42 | 0.940542 | HC_vs_MS.Trt_F |
| SFT2D2   | 5.95E-05 | 0.45022 | 0.991 | 0.97 | 0.9511   | HC_vs_MS.Trt_F |
| FAM49B   | 6.05E-05 | 0.42869 | 0.986 | 0.96 | 0.96642  | HC_vs_MS.Trt_F |
| ODF2L    | 6.05E-05 | 0.55823 | 0.986 | 0.94 | 0.966537 | HC_vs_MS.Trt_F |
| JMJD1C   | 6.07E-05 | 0.79469 | 0.373 | 0.23 | 0.969039 | HC_vs_MS.Trt_F |
| EREG     | 6.17E-05 | 0.767   | 0.853 | 0.76 | 0.985094 | HC_vs_MS.Trt_F |
| LRRTM4   | 6.30E-05 | 0.41959 | 0.633 | 0.48 | 1        | HC_vs_MS.Trt_F |
| PHKA2    | 6.38E-05 | 0.33623 | 0.734 | 0.6  | 1        | HC_vs_MS.Trt_F |
| SLC9A8   | 6.49E-05 | 0.44541 | 0.26  | 0.13 | 1        | HC_vs_MS.Trt_F |
| IFRD1    | 6.51E-05 | 0.46976 | 0.564 | 0.42 | 1        | HC_vs_MS.Trt_F |
| PDE4B    | 6.53E-05 | 0.69965 | 0.445 | 0.3  | 1        | HC_vs_MS.Trt_F |
| EPHB4    | 6.60E-05 | -0.4298 | 0.751 | 0.81 | 1        | HC_vs_MS.Trt_F |
| BORCS5   | 6.60E-05 | 0.73933 | 0.74  | 0.6  | 1        | HC_vs_MS.Trt_F |
| ABCC9    | 6.75E-05 | 0.30473 | 0.98  | 0.92 | 1        | HC_vs_MS.Trt_F |
| TMEM182  | 7.01E-05 | 0.46933 | 0.78  | 0.66 | 1        | HC_vs_MS.Trt_F |
| KIAA1217 | 7.17E-05 | 0.90823 | 0.165 | 0.07 | 1        | HC_vs_MS.Trt_F |
| SETD1B   | 7.23E-05 | 1.13046 | 0.249 | 0.13 | 1        | HC_vs_MS.Trt_F |
| GPR141   | 7.26E-05 | 0.26296 | 0.598 | 0.44 | 1        | HC_vs_MS.Trt_F |
| TBC1D1   | 7.50E-05 | 0.36381 | 0.688 | 0.52 | 1        | HC_vs_MS.Trt_F |
| ATN1     | 7.79E-05 | 0.61512 | 0.26  | 0.13 | 1        | HC_vs_MS.Trt_F |
| TAF7     | 7.83E-05 | 0.60274 | 0.448 | 0.29 | 1        | HC_vs_MS.Trt_F |
| C12orf50 | 7.90E-05 | 0.2969  | 0.922 | 0.89 | 1        | HC_vs_MS.Trt_F |
| RALGAPB  | 8.09E-05 | 0.31082 | 0.332 | 0.18 | 1        | HC_vs_MS.Trt_F |
| RHOBTB3  | 8.09E-05 | 0.34547 | 0.749 | 0.57 | 1        | HC_vs_MS.Trt_F |
| KATNAL2  | 8.35E-05 | 0.85012 | 0.416 | 0.26 | 1        | HC_vs_MS.Trt_F |

|             |          |         |       |      |   |                |
|-------------|----------|---------|-------|------|---|----------------|
| SF3A1       | 8.42E-05 | 0.84613 | 0.425 | 0.28 | 1 | HC_vs_MS.Trt_F |
| CHTF8       | 8.54E-05 | 0.62168 | 0.301 | 0.16 | 1 | HC_vs_MS.Trt_F |
| PIAS3       | 8.60E-05 | 0.58624 | 0.249 | 0.12 | 1 | HC_vs_MS.Trt_F |
| EIF4G1      | 8.62E-05 | 0.46252 | 0.613 | 0.48 | 1 | HC_vs_MS.Trt_F |
| SLC11A2     | 8.87E-05 | 0.51421 | 0.801 | 0.68 | 1 | HC_vs_MS.Trt_F |
| JUND        | 8.90E-05 | 0.43384 | 0.474 | 0.32 | 1 | HC_vs_MS.Trt_F |
| TMEM43      | 9.14E-05 | 0.72224 | 0.344 | 0.2  | 1 | HC_vs_MS.Trt_F |
| ETFDH       | 9.21E-05 | -0.2561 | 0.74  | 0.62 | 1 | HC_vs_MS.Trt_F |
| ZDHHC13     | 9.25E-05 | -0.796  | 0.803 | 0.66 | 1 | HC_vs_MS.Trt_F |
| KMT2D       | 1.01E-04 | 0.8306  | 0.87  | 0.84 | 1 | HC_vs_MS.Trt_F |
| HTRA4       | 1.01E-04 | 0.36015 | 0.535 | 0.37 | 1 | HC_vs_MS.Trt_F |
| AIF1L       | 1.04E-04 | 0.4886  | 0.11  | 0.03 | 1 | HC_vs_MS.Trt_F |
| RCL1        | 1.06E-04 | 0.39199 | 0.546 | 0.4  | 1 | HC_vs_MS.Trt_F |
| TPP1        | 1.07E-04 | 0.39436 | 0.477 | 0.32 | 1 | HC_vs_MS.Trt_F |
| TMOD3       | 1.10E-04 | 0.2508  | 0.965 | 0.91 | 1 | HC_vs_MS.Trt_F |
| WFDC1       | 1.15E-04 | 0.2883  | 0.835 | 0.76 | 1 | HC_vs_MS.Trt_F |
| KLF7        | 1.15E-04 | -0.5127 | 0.266 | 0.13 | 1 | HC_vs_MS.Trt_F |
| SPATS2L     | 1.17E-04 | 0.29571 | 0.968 | 0.94 | 1 | HC_vs_MS.Trt_F |
| FLVCR1      | 1.17E-04 | 0.86013 | 0.702 | 0.54 | 1 | HC_vs_MS.Trt_F |
| RP11-467J11 | 1.19E-04 | 0.34616 | 0.607 | 0.45 | 1 | HC_vs_MS.Trt_F |
| RPS6        | 1.20E-04 | -0.3134 | 0.919 | 0.93 | 1 | HC_vs_MS.Trt_F |
| HEATR5B     | 1.21E-04 | 0.41448 | 0.523 | 0.35 | 1 | HC_vs_MS.Trt_F |
| NFKBIA      | 1.22E-04 | 0.58816 | 0.468 | 0.31 | 1 | HC_vs_MS.Trt_F |
| ARF6        | 1.22E-04 | -0.8313 | 0.592 | 0.7  | 1 | HC_vs_MS.Trt_F |
| NUPL2       | 1.22E-04 | 0.3104  | 0.991 | 0.96 | 1 | HC_vs_MS.Trt_F |
| PLCB2       | 1.24E-04 | 0.91862 | 0.327 | 0.19 | 1 | HC_vs_MS.Trt_F |
| LIMS3       | 1.24E-04 | 0.26845 | 0.647 | 0.53 | 1 | HC_vs_MS.Trt_F |
| TXNRD1      | 1.24E-04 | 1.31928 | 0.376 | 0.23 | 1 | HC_vs_MS.Trt_F |
| CCR8        | 1.28E-04 | 1.0225  | 0.257 | 0.13 | 1 | HC_vs_MS.Trt_F |
| HSP90B1     | 1.33E-04 | 0.32217 | 0.405 | 0.26 | 1 | HC_vs_MS.Trt_F |
| BAZ2A       | 0.00013  | 0.63117 | 0.731 | 0.59 | 1 | HC_vs_MS.Trt_F |
| TNIK        | 1.33E-04 | 0.63187 | 0.451 | 0.31 | 1 | HC_vs_MS.Trt_F |
| GABARAPL1   | 1.33E-04 | 1.09232 | 0.251 | 0.13 | 1 | HC_vs_MS.Trt_F |
| IRF1        | 1.33E-04 | 0.45607 | 0.922 | 0.85 | 1 | HC_vs_MS.Trt_F |
| H2AFY       | 1.35E-04 | 0.30087 | 0.321 | 0.18 | 1 | HC_vs_MS.Trt_F |
| COL28A1     | 1.36E-04 | 0.47694 | 0.488 | 0.34 | 1 | HC_vs_MS.Trt_F |
| TUBA1B      | 1.37E-04 | 0.25627 | 0.442 | 0.28 | 1 | HC_vs_MS.Trt_F |
| CALD1       | 1.38E-04 | 1.18353 | 0.327 | 0.19 | 1 | HC_vs_MS.Trt_F |
| VNN3        | 1.39E-04 | 0.67349 | 0.477 | 0.32 | 1 | HC_vs_MS.Trt_F |
| GSTO2       | 1.40E-04 | 0.42074 | 0.896 | 0.77 | 1 | HC_vs_MS.Trt_F |

|            |          |         |       |      |   |                |
|------------|----------|---------|-------|------|---|----------------|
| NOTCH2     | 1.42E-04 | 0.92162 | 0.309 | 0.17 | 1 | HC_vs_MS.Trt_F |
| GTPBP1     | 1.51E-04 | 0.65636 | 0.604 | 0.49 | 1 | HC_vs_MS.Trt_F |
| PFKP       | 1.52E-04 | 0.30911 | 0.387 | 0.23 | 1 | HC_vs_MS.Trt_F |
| TTC39C     | 1.55E-04 | -0.9098 | 0.824 | 0.82 | 1 | HC_vs_MS.Trt_F |
| PIP4K2A    | 1.58E-04 | -0.6364 | 0.72  | 0.82 | 1 | HC_vs_MS.Trt_F |
| EHD2       | 1.60E-04 | 0.91774 | 0.884 | 0.8  | 1 | HC_vs_MS.Trt_F |
| RGR        | 1.62E-04 | 0.64853 | 0.529 | 0.35 | 1 | HC_vs_MS.Trt_F |
| SLC30A3    | 1.63E-04 | 0.258   | 0.529 | 0.36 | 1 | HC_vs_MS.Trt_F |
| TUBA1A     | 1.64E-04 | 1.06414 | 0.361 | 0.23 | 1 | HC_vs_MS.Trt_F |
| DDX21      | 1.70E-04 | 0.60735 | 0.393 | 0.25 | 1 | HC_vs_MS.Trt_F |
| NR4A3      | 1.77E-04 | 1.39177 | 0.246 | 0.13 | 1 | HC_vs_MS.Trt_F |
| PACS1      | 1.77E-04 | 0.43457 | 0.853 | 0.79 | 1 | HC_vs_MS.Trt_F |
| RPL6       | 1.82E-04 | -0.3644 | 0.945 | 0.95 | 1 | HC_vs_MS.Trt_F |
| ZSCAN30    | 1.89E-04 | 0.25346 | 0.835 | 0.67 | 1 | HC_vs_MS.Trt_F |
| CREM       | 1.96E-04 | 0.66266 | 0.445 | 0.31 | 1 | HC_vs_MS.Trt_F |
| DAAM1      | 1.97E-04 | -0.3249 | 0.988 | 0.98 | 1 | HC_vs_MS.Trt_F |
| PPP2R1A    | 1.99E-04 | 0.32979 | 0.775 | 0.64 | 1 | HC_vs_MS.Trt_F |
| JAK2       | 2.00E-04 | 0.9393  | 0.303 | 0.17 | 1 | HC_vs_MS.Trt_F |
| ARID1A     | 2.01E-04 | 0.37927 | 0.965 | 0.91 | 1 | HC_vs_MS.Trt_F |
| AF011889.5 | 2.03E-04 | 0.51133 | 0.295 | 0.17 | 1 | HC_vs_MS.Trt_F |
| ACBD6      | 2.03E-04 | 0.54081 | 0.477 | 0.34 | 1 | HC_vs_MS.Trt_F |
| SETD1A     | 2.04E-04 | 1.1601  | 0.168 | 0.07 | 1 | HC_vs_MS.Trt_F |
| VPS36      | 2.04E-04 | 0.31419 | 0.358 | 0.22 | 1 | HC_vs_MS.Trt_F |
| NEGR1      | 2.06E-04 | 0.4599  | 0.873 | 0.76 | 1 | HC_vs_MS.Trt_F |
| SYTL3      | 2.06E-04 | 0.39944 | 0.384 | 0.24 | 1 | HC_vs_MS.Trt_F |
| GDPD5      | 2.08E-04 | 0.91824 | 0.332 | 0.19 | 1 | HC_vs_MS.Trt_F |
| TMED3      | 2.12E-04 | 0.28149 | 0.699 | 0.56 | 1 | HC_vs_MS.Trt_F |
| FER        | 2.16E-04 | 0.71533 | 0.575 | 0.42 | 1 | HC_vs_MS.Trt_F |
| CFAP74     | 2.28E-04 | 0.27812 | 0.882 | 0.8  | 1 | HC_vs_MS.Trt_F |
| MGAT4C     | 2.33E-04 | 0.38551 | 0.835 | 0.72 | 1 | HC_vs_MS.Trt_F |
| CDH8       | 2.36E-04 | 0.67192 | 0.514 | 0.36 | 1 | HC_vs_MS.Trt_F |
| LTBP3      | 2.38E-04 | 0.5087  | 0.757 | 0.62 | 1 | HC_vs_MS.Trt_F |
| SLC38A2    | 2.44E-04 | 0.84139 | 0.425 | 0.28 | 1 | HC_vs_MS.Trt_F |
| EXOSC7     | 2.46E-04 | 0.61785 | 0.552 | 0.4  | 1 | HC_vs_MS.Trt_F |
| IGFBP1     | 2.50E-04 | 0.36411 | 0.685 | 0.52 | 1 | HC_vs_MS.Trt_F |
| BAG6       | 2.61E-04 | 0.74754 | 0.691 | 0.55 | 1 | HC_vs_MS.Trt_F |
| ALPK1      | 2.61E-04 | 0.26221 | 0.806 | 0.7  | 1 | HC_vs_MS.Trt_F |
| RGPD1      | 0.00028  | 0.73241 | 0.364 | 0.22 | 1 | HC_vs_MS.Trt_F |
| EXOC3L4    | 2.77E-04 | 0.30917 | 0.254 | 0.14 | 1 | HC_vs_MS.Trt_F |
| IRS2       | 2.78E-04 | 1.5451  | 0.477 | 0.36 | 1 | HC_vs_MS.Trt_F |

|          |          |         |       |      |   |                |
|----------|----------|---------|-------|------|---|----------------|
| ITGA11   | 2.80E-04 | 0.97585 | 0.708 | 0.56 | 1 | HC_vs_MS.Trt_F |
| SYNE2    | 2.82E-04 | 0.38456 | 0.962 | 0.94 | 1 | HC_vs_MS.Trt_F |
| SPDYE2   | 2.86E-04 | -0.4065 | 0.538 | 0.63 | 1 | HC_vs_MS.Trt_F |
| SNX9     | 2.92E-04 | 0.55735 | 0.254 | 0.14 | 1 | HC_vs_MS.Trt_F |
| ATP5B    | 2.96E-04 | 0.41102 | 0.488 | 0.35 | 1 | HC_vs_MS.Trt_F |
| HNRNPL   | 2.96E-04 | -0.7091 | 0.85  | 0.81 | 1 | HC_vs_MS.Trt_F |
| AP4E1    | 2.97E-04 | -0.2631 | 0.486 | 0.34 | 1 | HC_vs_MS.Trt_F |
| SETD5    | 3.01E-04 | 0.31544 | 0.665 | 0.52 | 1 | HC_vs_MS.Trt_F |
| SAFB2    | 3.03E-04 | 0.69369 | 0.908 | 0.83 | 1 | HC_vs_MS.Trt_F |
| TMEM91   | 0.00031  | 0.50532 | 0.598 | 0.45 | 1 | HC_vs_MS.Trt_F |
| RPL18A   | 3.17E-04 | -0.3209 | 0.858 | 0.88 | 1 | HC_vs_MS.Trt_F |
| PRKCQ    | 3.18E-04 | 0.29703 | 0.396 | 0.26 | 1 | HC_vs_MS.Trt_F |
| DIP2A    | 3.25E-04 | 0.64238 | 0.884 | 0.81 | 1 | HC_vs_MS.Trt_F |
| JOSD1    | 3.25E-04 | 0.62833 | 0.639 | 0.5  | 1 | HC_vs_MS.Trt_F |
| MFAP5    | 3.34E-04 | 0.46946 | 0.454 | 0.32 | 1 | HC_vs_MS.Trt_F |
| HLA-F    | 3.35E-04 | 0.69953 | 0.592 | 0.48 | 1 | HC_vs_MS.Trt_F |
| NMRK1    | 3.39E-04 | -0.9628 | 0.382 | 0.22 | 1 | HC_vs_MS.Trt_F |
| CHRDL1   | 3.46E-04 | 0.32997 | 0.182 | 0.09 | 1 | HC_vs_MS.Trt_F |
| KIAA0141 | 3.51E-04 | 1.12285 | 0.249 | 0.13 | 1 | HC_vs_MS.Trt_F |
| GPX3     | 3.57E-04 | 1.17362 | 0.205 | 0.1  | 1 | HC_vs_MS.Trt_F |
| ZNF445   | 3.60E-04 | 0.4428  | 0.988 | 0.98 | 1 | HC_vs_MS.Trt_F |
| MTBP     | 3.68E-04 | 0.58671 | 0.676 | 0.55 | 1 | HC_vs_MS.Trt_F |
| ARHGEF1  | 3.68E-04 | 0.435   | 0.928 | 0.89 | 1 | HC_vs_MS.Trt_F |
| DLGAP4   | 3.68E-04 | 0.71896 | 0.257 | 0.14 | 1 | HC_vs_MS.Trt_F |
| SYCP1    | 3.76E-04 | 0.34961 | 0.384 | 0.25 | 1 | HC_vs_MS.Trt_F |
| BRD9     | 3.80E-04 | 0.91142 | 0.234 | 0.13 | 1 | HC_vs_MS.Trt_F |
| TGFBR2   | 3.80E-04 | 0.63603 | 0.277 | 0.16 | 1 | HC_vs_MS.Trt_F |
| CASP8    | 3.83E-04 | 0.42835 | 0.931 | 0.91 | 1 | HC_vs_MS.Trt_F |
| CD151    | 3.87E-04 | 0.44942 | 0.942 | 0.88 | 1 | HC_vs_MS.Trt_F |
| CAV1     | 3.92E-04 | 1.02687 | 0.171 | 0.08 | 1 | HC_vs_MS.Trt_F |
| GSG1     | 3.92E-04 | 0.36097 | 0.627 | 0.5  | 1 | HC_vs_MS.Trt_F |
| PRKACB   | 3.95E-04 | 0.40677 | 0.35  | 0.22 | 1 | HC_vs_MS.Trt_F |
| ZNF83    | 3.99E-04 | 0.35915 | 0.87  | 0.82 | 1 | HC_vs_MS.Trt_F |
| NLK      | 4.04E-04 | 0.83536 | 0.37  | 0.23 | 1 | HC_vs_MS.Trt_F |
| OPRM1    | 0.00041  | 0.44702 | 0.89  | 0.82 | 1 | HC_vs_MS.Trt_F |
| RAB8B    | 4.09E-04 | 0.55788 | 0.399 | 0.27 | 1 | HC_vs_MS.Trt_F |
| ZNF287   | 4.14E-04 | 0.41345 | 0.517 | 0.38 | 1 | HC_vs_MS.Trt_F |
| LRCH3    | 4.16E-04 | 0.4938  | 0.988 | 0.97 | 1 | HC_vs_MS.Trt_F |
| GOLGA8A  | 4.22E-04 | 0.41444 | 0.509 | 0.4  | 1 | HC_vs_MS.Trt_F |
| GABPB1   | 4.32E-04 | -0.5462 | 0.581 | 0.43 | 1 | HC_vs_MS.Trt_F |

|          |          |         |       |      |   |                |
|----------|----------|---------|-------|------|---|----------------|
| TUBB4B   | 4.34E-04 | 0.29971 | 0.283 | 0.16 | 1 | HC_vs_MS.Trt_F |
| 11-Sep   | 4.39E-04 | 0.35477 | 0.538 | 0.39 | 1 | HC_vs_MS.Trt_F |
| APOD     | 4.44E-04 | 0.66356 | 0.35  | 0.23 | 1 | HC_vs_MS.Trt_F |
| ATXN2    | 0.00045  | 0.32559 | 0.934 | 0.86 | 1 | HC_vs_MS.Trt_F |
| GTF2H2C  | 4.54E-04 | -0.3618 | 0.477 | 0.34 | 1 | HC_vs_MS.Trt_F |
| DOCK2    | 4.57E-04 | 0.41038 | 0.509 | 0.36 | 1 | HC_vs_MS.Trt_F |
| PTPN1    | 4.60E-04 | 0.56723 | 0.41  | 0.26 | 1 | HC_vs_MS.Trt_F |
| KMT2A    | 4.65E-04 | 0.25921 | 0.962 | 0.93 | 1 | HC_vs_MS.Trt_F |
| SRSF1    | 4.73E-04 | 0.30866 | 0.624 | 0.48 | 1 | HC_vs_MS.Trt_F |
| ADGRF5   | 4.73E-04 | -1.3388 | 0.133 | 0.05 | 1 | HC_vs_MS.Trt_F |
| STK4     | 4.74E-04 | 0.29067 | 0.925 | 0.86 | 1 | HC_vs_MS.Trt_F |
| FNBP4    | 4.75E-04 | 0.76209 | 0.546 | 0.42 | 1 | HC_vs_MS.Trt_F |
| MARK3    | 4.82E-04 | 0.63523 | 0.882 | 0.82 | 1 | HC_vs_MS.Trt_F |
| SERPING1 | 4.84E-04 | 0.90094 | 0.15  | 0.07 | 1 | HC_vs_MS.Trt_F |
| ANAPC1   | 4.95E-04 | 0.7405  | 0.65  | 0.5  | 1 | HC_vs_MS.Trt_F |
| ZNF850   | 5.06E-04 | 0.30117 | 0.957 | 0.9  | 1 | HC_vs_MS.Trt_F |
| MCMDC2   | 5.13E-04 | 1.10151 | 0.488 | 0.37 | 1 | HC_vs_MS.Trt_F |
| CTBP1    | 5.27E-04 | 0.38705 | 0.532 | 0.37 | 1 | HC_vs_MS.Trt_F |
| CAPN7    | 5.39E-04 | 0.55846 | 0.624 | 0.46 | 1 | HC_vs_MS.Trt_F |
| FBXO15   | 5.40E-04 | 0.41706 | 0.665 | 0.55 | 1 | HC_vs_MS.Trt_F |
| NIPBL    | 5.40E-04 | 0.54722 | 0.624 | 0.48 | 1 | HC_vs_MS.Trt_F |
| LGMN     | 5.40E-04 | 0.2581  | 0.971 | 0.94 | 1 | HC_vs_MS.Trt_F |
| PEX1     | 5.40E-04 | 0.4589  | 0.792 | 0.7  | 1 | HC_vs_MS.Trt_F |
| COL1A2   | 5.48E-04 | 1.46795 | 0.532 | 0.39 | 1 | HC_vs_MS.Trt_F |
| SLITRK2  | 5.54E-04 | 0.41256 | 0.353 | 0.23 | 1 | HC_vs_MS.Trt_F |
| PRDM2    | 5.55E-04 | 0.52207 | 0.52  | 0.39 | 1 | HC_vs_MS.Trt_F |
| PKM      | 5.60E-04 | 0.41498 | 0.647 | 0.48 | 1 | HC_vs_MS.Trt_F |
| PHF1     | 5.63E-04 | 1.74344 | 0.234 | 0.13 | 1 | HC_vs_MS.Trt_F |
| JUNB     | 5.63E-04 | 0.30779 | 0.676 | 0.57 | 1 | HC_vs_MS.Trt_F |
| FASTKD2  | 5.69E-04 | -0.5352 | 0.668 | 0.53 | 1 | HC_vs_MS.Trt_F |
| PICALM   | 5.70E-04 | 0.40541 | 0.335 | 0.2  | 1 | HC_vs_MS.Trt_F |
| UNC80    | 5.70E-04 | 0.30303 | 0.864 | 0.79 | 1 | HC_vs_MS.Trt_F |
| RPS19    | 5.72E-04 | -0.3251 | 0.928 | 0.95 | 1 | HC_vs_MS.Trt_F |
| HGSNAT   | 5.76E-04 | 0.71621 | 0.772 | 0.7  | 1 | HC_vs_MS.Trt_F |
| ZZEF1    | 5.83E-04 | 0.69261 | 0.592 | 0.46 | 1 | HC_vs_MS.Trt_F |
| RASA1    | 5.84E-04 | 0.40577 | 0.312 | 0.19 | 1 | HC_vs_MS.Trt_F |
| CYP3A5   | 5.92E-04 | 0.34766 | 0.884 | 0.8  | 1 | HC_vs_MS.Trt_F |
| FKBP14   | 6.06E-04 | 0.53844 | 0.728 | 0.62 | 1 | HC_vs_MS.Trt_F |
| CDC14A   | 6.10E-04 | 0.6609  | 0.303 | 0.18 | 1 | HC_vs_MS.Trt_F |
| CD28     | 6.23E-04 | 0.34773 | 0.65  | 0.55 | 1 | HC_vs_MS.Trt_F |

|          |          |         |       |      |   |                |
|----------|----------|---------|-------|------|---|----------------|
| FNTA     | 6.38E-04 | 0.55826 | 0.896 | 0.82 | 1 | HC_vs_MS.Trt_F |
| RPL7     | 6.44E-04 | -0.3343 | 0.844 | 0.84 | 1 | HC_vs_MS.Trt_F |
| B3GAT1   | 6.55E-04 | 0.77716 | 0.312 | 0.19 | 1 | HC_vs_MS.Trt_F |
| SRSF3    | 6.57E-04 | -0.5961 | 0.902 | 0.9  | 1 | HC_vs_MS.Trt_F |
| CD40LG   | 6.64E-04 | 1.13049 | 0.266 | 0.16 | 1 | HC_vs_MS.Trt_F |
| TEP1     | 6.81E-04 | 1.22067 | 0.488 | 0.37 | 1 | HC_vs_MS.Trt_F |
| SLC35C2  | 7.22E-04 | 0.48966 | 0.63  | 0.48 | 1 | HC_vs_MS.Trt_F |
| MFSD14C  | 7.28E-04 | 0.64235 | 0.746 | 0.62 | 1 | HC_vs_MS.Trt_F |
| PPP1R15A | 7.29E-04 | 0.55867 | 0.702 | 0.65 | 1 | HC_vs_MS.Trt_F |
| CDK6     | 7.33E-04 | 0.98685 | 0.257 | 0.15 | 1 | HC_vs_MS.Trt_F |
| YTHDF3   | 7.48E-04 | 0.52174 | 0.754 | 0.64 | 1 | HC_vs_MS.Trt_F |
| ARMC9    | 7.58E-04 | 0.34721 | 0.757 | 0.69 | 1 | HC_vs_MS.Trt_F |
| RNF19A   | 7.61E-04 | 0.65281 | 0.506 | 0.4  | 1 | HC_vs_MS.Trt_F |
| ULK4     | 7.86E-04 | 1.43013 | 0.431 | 0.29 | 1 | HC_vs_MS.Trt_F |
| EFCAB11  | 7.88E-04 | 0.27902 | 0.873 | 0.8  | 1 | HC_vs_MS.Trt_F |
| CDK5RAP1 | 7.92E-04 | 0.37903 | 0.48  | 0.34 | 1 | HC_vs_MS.Trt_F |
| DTX2     | 7.93E-04 | 0.64469 | 0.506 | 0.37 | 1 | HC_vs_MS.Trt_F |
| CLEC7A   | 7.95E-04 | 0.8115  | 0.665 | 0.52 | 1 | HC_vs_MS.Trt_F |
| AKT2     | 7.95E-04 | 0.47745 | 0.968 | 0.95 | 1 | HC_vs_MS.Trt_F |
| CASC3    | 8.09E-04 | 0.27646 | 0.697 | 0.53 | 1 | HC_vs_MS.Trt_F |
| ATF7     | 8.10E-04 | 0.42115 | 0.538 | 0.4  | 1 | HC_vs_MS.Trt_F |
| PDLIM2   | 8.20E-04 | 0.40412 | 0.772 | 0.63 | 1 | HC_vs_MS.Trt_F |
| TFPI     | 8.30E-04 | 0.28437 | 0.948 | 0.89 | 1 | HC_vs_MS.Trt_F |
| CBX6     | 8.38E-04 | -0.7356 | 0.532 | 0.6  | 1 | HC_vs_MS.Trt_F |
| RHBDD2   | 8.52E-04 | 0.39783 | 0.367 | 0.24 | 1 | HC_vs_MS.Trt_F |
| FLNB     | 8.61E-04 | 0.26476 | 0.471 | 0.35 | 1 | HC_vs_MS.Trt_F |
| CAPS2    | 8.69E-04 | 1.17019 | 0.488 | 0.36 | 1 | HC_vs_MS.Trt_F |
| APOLD1   | 8.84E-04 | 0.59715 | 0.566 | 0.45 | 1 | HC_vs_MS.Trt_F |
| PHKG1    | 8.88E-04 | 0.48027 | 0.373 | 0.25 | 1 | HC_vs_MS.Trt_F |
| PLEC     | 8.88E-04 | 0.32157 | 0.439 | 0.31 | 1 | HC_vs_MS.Trt_F |
| MBNL2    | 8.88E-04 | 0.70946 | 0.315 | 0.19 | 1 | HC_vs_MS.Trt_F |
| PPP6R2   | 8.94E-04 | 0.28569 | 0.428 | 0.29 | 1 | HC_vs_MS.Trt_F |
| THRA     | 9.01E-04 | 0.79343 | 0.208 | 0.1  | 1 | HC_vs_MS.Trt_F |
| MYO9A    | 9.10E-04 | 0.27355 | 0.402 | 0.27 | 1 | HC_vs_MS.Trt_F |
| C5orf45  | 9.10E-04 | 0.51534 | 0.913 | 0.85 | 1 | HC_vs_MS.Trt_F |
| SYVN1    | 9.17E-04 | 0.55543 | 0.298 | 0.18 | 1 | HC_vs_MS.Trt_F |
| MAPKBP1  | 9.26E-04 | 0.56006 | 0.552 | 0.41 | 1 | HC_vs_MS.Trt_F |
| SPARCL1  | 9.33E-04 | -0.3277 | 0.292 | 0.18 | 1 | HC_vs_MS.Trt_F |
| XRCC1    | 9.39E-04 | 0.562   | 0.228 | 0.12 | 1 | HC_vs_MS.Trt_F |
| CACNA1D  | 9.41E-04 | 0.78523 | 0.728 | 0.63 | 1 | HC_vs_MS.Trt_F |

|          |          |         |       |      |   |                |
|----------|----------|---------|-------|------|---|----------------|
| NCKAP1L  | 9.54E-04 | 0.53494 | 0.815 | 0.7  | 1 | HC_vs_MS.Trt_F |
| IL1RAP   | 9.55E-04 | 0.86808 | 0.659 | 0.55 | 1 | HC_vs_MS.Trt_F |
| RTN4     | 9.57E-04 | 0.50522 | 0.35  | 0.23 | 1 | HC_vs_MS.Trt_F |
| SEC23IP  | 9.57E-04 | 0.30227 | 0.512 | 0.39 | 1 | HC_vs_MS.Trt_F |
| SRSF7    | 9.68E-04 | 0.28749 | 0.538 | 0.4  | 1 | HC_vs_MS.Trt_F |
| GPR174   | 9.80E-04 | 0.59135 | 0.263 | 0.16 | 1 | HC_vs_MS.Trt_F |
| WDR89    | 9.87E-04 | 0.73074 | 0.399 | 0.27 | 1 | HC_vs_MS.Trt_F |
| RASL10B  | 9.91E-04 | 0.26454 | 0.977 | 0.97 | 1 | HC_vs_MS.Trt_F |
| SRSF6    | 9.98E-04 | -0.9168 | 0.627 | 0.72 | 1 | HC_vs_MS.Trt_F |
| PPIC     | 9.98E-04 | 0.85472 | 0.173 | 0.09 | 1 | HC_vs_MS.Trt_F |
| DND1     | 0.001    | -0.4854 | 0.038 | 0.1  | 1 | HC_vs_MS.Trt_F |
| ABO      | 0.00101  | 0.38498 | 0.462 | 0.33 | 1 | HC_vs_MS.Trt_F |
| AFDN     | 0.00101  | 1.39012 | 0.185 | 0.09 | 1 | HC_vs_MS.Trt_F |
| BCO2     | 0.00101  | 0.60759 | 0.627 | 0.51 | 1 | HC_vs_MS.Trt_F |
| CMSS1    | 0.00101  | 0.46884 | 0.763 | 0.71 | 1 | HC_vs_MS.Trt_F |
| SP3      | 0.00102  | 0.76178 | 0.639 | 0.49 | 1 | HC_vs_MS.Trt_F |
| CSTF1    | 0.00103  | -1.0021 | 0.72  | 0.82 | 1 | HC_vs_MS.Trt_F |
| RIMS2    | 0.00105  | 0.31122 | 0.957 | 0.92 | 1 | HC_vs_MS.Trt_F |
| INO80C   | 0.00105  | 0.3389  | 0.934 | 0.92 | 1 | HC_vs_MS.Trt_F |
| KIAA1328 | 0.00105  | 0.32626 | 0.986 | 0.94 | 1 | HC_vs_MS.Trt_F |
| PDGFRB   | 0.00106  | 1.07898 | 0.116 | 0.04 | 1 | HC_vs_MS.Trt_F |
| CXorf38  | 0.00106  | 0.35104 | 0.847 | 0.82 | 1 | HC_vs_MS.Trt_F |
| CTNNB1   | 0.00108  | -0.5018 | 0.503 | 0.63 | 1 | HC_vs_MS.Trt_F |
| NDUFAF5  | 0.00111  | 0.33658 | 0.633 | 0.48 | 1 | HC_vs_MS.Trt_F |
| SLC17A5  | 0.00111  | 0.27962 | 0.569 | 0.42 | 1 | HC_vs_MS.Trt_F |
| SEC16A   | 0.00111  | 0.49279 | 0.26  | 0.15 | 1 | HC_vs_MS.Trt_F |
| RHOC     | 0.00112  | 0.47627 | 0.266 | 0.16 | 1 | HC_vs_MS.Trt_F |
| MT-ND3   | 0.00112  | 0.3804  | 0.532 | 0.42 | 1 | HC_vs_MS.Trt_F |
| DNAJB1   | 0.00114  | 0.39319 | 0.777 | 0.68 | 1 | HC_vs_MS.Trt_F |
| CCDC144A | 0.00114  | 0.61818 | 0.908 | 0.87 | 1 | HC_vs_MS.Trt_F |
| UBA1     | 0.00116  | 0.45713 | 0.844 | 0.76 | 1 | HC_vs_MS.Trt_F |
| MAP1LC3B | 0.00117  | 0.48261 | 0.442 | 0.31 | 1 | HC_vs_MS.Trt_F |
| XDH      | 0.00117  | 0.39592 | 0.431 | 0.31 | 1 | HC_vs_MS.Trt_F |
| NRG4     | 0.00117  | 0.45343 | 0.72  | 0.59 | 1 | HC_vs_MS.Trt_F |
| FOSB     | 0.00118  | 1.01596 | 0.474 | 0.36 | 1 | HC_vs_MS.Trt_F |
| NXF1     | 0.0012   | 0.41197 | 0.673 | 0.56 | 1 | HC_vs_MS.Trt_F |
| VPS13B   | 0.0012   | 0.38962 | 0.76  | 0.63 | 1 | HC_vs_MS.Trt_F |
| KIAA1683 | 0.00121  | 0.67114 | 0.717 | 0.6  | 1 | HC_vs_MS.Trt_F |
| BAG1     | 0.00121  | 0.38603 | 0.954 | 0.87 | 1 | HC_vs_MS.Trt_F |
| CECR1    | 0.00122  | 0.73383 | 0.503 | 0.36 | 1 | HC_vs_MS.Trt_F |

|          |         |         |       |      |   |                |
|----------|---------|---------|-------|------|---|----------------|
| CSF2RA   | 0.00124 | 0.27408 | 0.988 | 0.97 | 1 | HC_vs_MS.Trt_F |
| EFTUD2   | 0.00125 | 0.44303 | 0.806 | 0.76 | 1 | HC_vs_MS.Trt_F |
| ZMAT5    | 0.00125 | 0.41597 | 0.777 | 0.68 | 1 | HC_vs_MS.Trt_F |
| APBB3    | 0.00126 | 0.94463 | 0.202 | 0.11 | 1 | HC_vs_MS.Trt_F |
| SV2B     | 0.00127 | 0.27837 | 0.442 | 0.31 | 1 | HC_vs_MS.Trt_F |
| ARHGEF9  | 0.00128 | 0.80408 | 0.613 | 0.52 | 1 | HC_vs_MS.Trt_F |
| CXXC5    | 0.00129 | -0.682  | 0.569 | 0.45 | 1 | HC_vs_MS.Trt_F |
| BATF     | 0.0013  | 0.63187 | 0.24  | 0.14 | 1 | HC_vs_MS.Trt_F |
| KDM4C    | 0.00131 | 0.39711 | 0.332 | 0.22 | 1 | HC_vs_MS.Trt_F |
| ANKRD44  | 0.00131 | 0.30399 | 0.864 | 0.76 | 1 | HC_vs_MS.Trt_F |
| MT-ND6   | 0.00131 | 0.30395 | 0.777 | 0.65 | 1 | HC_vs_MS.Trt_F |
| SLC4A5   | 0.00132 | 0.59443 | 0.827 | 0.72 | 1 | HC_vs_MS.Trt_F |
| DNAJB11  | 0.00134 | 0.75289 | 0.269 | 0.16 | 1 | HC_vs_MS.Trt_F |
| CDH6     | 0.00135 | 0.26678 | 0.627 | 0.5  | 1 | HC_vs_MS.Trt_F |
| ABHD11   | 0.00135 | 0.57246 | 0.751 | 0.59 | 1 | HC_vs_MS.Trt_F |
| DUSP6    | 0.00135 | 1.44208 | 0.147 | 0.07 | 1 | HC_vs_MS.Trt_F |
| MYO10    | 0.00137 | 0.41577 | 0.74  | 0.62 | 1 | HC_vs_MS.Trt_F |
| GSN      | 0.00146 | 0.71788 | 0.714 | 0.64 | 1 | HC_vs_MS.Trt_F |
| ZGPAT    | 0.00146 | 1.23283 | 0.208 | 0.11 | 1 | HC_vs_MS.Trt_F |
| BTLA     | 0.00148 | -0.3636 | 0.22  | 0.12 | 1 | HC_vs_MS.Trt_F |
| SDCBP    | 0.00149 | 0.33103 | 0.309 | 0.2  | 1 | HC_vs_MS.Trt_F |
| PISD     | 0.00149 | 0.51966 | 0.217 | 0.12 | 1 | HC_vs_MS.Trt_F |
| FRRS1L   | 0.00151 | 0.25355 | 0.925 | 0.85 | 1 | HC_vs_MS.Trt_F |
| IRAK1BP1 | 0.00151 | 0.47069 | 0.734 | 0.61 | 1 | HC_vs_MS.Trt_F |
| PCDH10   | 0.00152 | 0.35199 | 0.214 | 0.12 | 1 | HC_vs_MS.Trt_F |
| INPP4B   | 0.00154 | 0.51993 | 0.601 | 0.49 | 1 | HC_vs_MS.Trt_F |
| HMGA2    | 0.00155 | 0.2695  | 0.74  | 0.62 | 1 | HC_vs_MS.Trt_F |
| TBC1D5   | 0.00156 | 0.38266 | 0.647 | 0.54 | 1 | HC_vs_MS.Trt_F |
| FAM120C  | 0.00156 | 0.53132 | 0.298 | 0.19 | 1 | HC_vs_MS.Trt_F |
| NUP35    | 0.00156 | -0.2705 | 0.662 | 0.5  | 1 | HC_vs_MS.Trt_F |
| TACC1    | 0.00158 | 0.45926 | 0.566 | 0.47 | 1 | HC_vs_MS.Trt_F |
| AP1G2    | 0.00158 | 0.28316 | 0.731 | 0.63 | 1 | HC_vs_MS.Trt_F |
| C10orf10 | 0.00158 | 0.57591 | 0.107 | 0.04 | 1 | HC_vs_MS.Trt_F |
| SPDYE1   | 0.00161 | -0.3825 | 0.483 | 0.59 | 1 | HC_vs_MS.Trt_F |
| BCLAF1   | 0.00162 | 0.54117 | 0.512 | 0.4  | 1 | HC_vs_MS.Trt_F |
| LRBA     | 0.00164 | 0.85222 | 0.52  | 0.4  | 1 | HC_vs_MS.Trt_F |
| ARHGAP29 | 0.00166 | 0.31808 | 0.538 | 0.38 | 1 | HC_vs_MS.Trt_F |
| NR4A1    | 0.00168 | 0.31964 | 0.569 | 0.44 | 1 | HC_vs_MS.Trt_F |
| FREM2    | 0.00168 | -0.3411 | 0.598 | 0.67 | 1 | HC_vs_MS.Trt_F |
| RPS18    | 0.00169 | -0.2835 | 0.954 | 0.95 | 1 | HC_vs_MS.Trt_F |



|          |         |         |       |      |   |                |
|----------|---------|---------|-------|------|---|----------------|
| FGF23    | 0.0017  | 0.42301 | 0.925 | 0.82 | 1 | HC_vs_MS.Trt_F |
| OPHN1    | 0.00172 | 0.27755 | 0.977 | 0.96 | 1 | HC_vs_MS.Trt_F |
| PTBP3    | 0.00173 | 0.41785 | 0.425 | 0.31 | 1 | HC_vs_MS.Trt_F |
| TKT      | 0.00173 | 0.26282 | 0.705 | 0.58 | 1 | HC_vs_MS.Trt_F |
| ZNF212   | 0.00174 | -0.2991 | 0.506 | 0.37 | 1 | HC_vs_MS.Trt_F |
| CCDC7    | 0.00174 | 1.17193 | 0.191 | 0.1  | 1 | HC_vs_MS.Trt_F |
| CCDC57   | 0.00175 | 0.35762 | 0.997 | 0.99 | 1 | HC_vs_MS.Trt_F |
| GADD45B  | 0.00175 | 1.1691  | 0.22  | 0.13 | 1 | HC_vs_MS.Trt_F |
| AIFM2    | 0.00175 | -0.402  | 0.514 | 0.37 | 1 | HC_vs_MS.Trt_F |
| GCNT4    | 0.00175 | -0.8987 | 0.344 | 0.44 | 1 | HC_vs_MS.Trt_F |
| LYRM2    | 0.00177 | 0.31734 | 0.876 | 0.81 | 1 | HC_vs_MS.Trt_F |
| CYB561D1 | 0.0018  | 0.52482 | 0.5   | 0.39 | 1 | HC_vs_MS.Trt_F |
| OSBPL10  | 0.00181 | 0.45361 | 0.468 | 0.36 | 1 | HC_vs_MS.Trt_F |
| SUCO     | 0.00181 | 1.14667 | 0.194 | 0.1  | 1 | HC_vs_MS.Trt_F |
| KDM6B    | 0.00183 | 0.88227 | 0.289 | 0.18 | 1 | HC_vs_MS.Trt_F |
| CPT2     | 0.00186 | 0.44765 | 0.818 | 0.73 | 1 | HC_vs_MS.Trt_F |
| KLC4     | 0.00186 | 0.59678 | 0.876 | 0.8  | 1 | HC_vs_MS.Trt_F |
| PSMB5    | 0.00186 | 1.05922 | 0.231 | 0.13 | 1 | HC_vs_MS.Trt_F |
| FOSL2    | 0.00187 | 0.94631 | 0.347 | 0.25 | 1 | HC_vs_MS.Trt_F |
| BAZ2B    | 0.00187 | 0.66861 | 0.847 | 0.81 | 1 | HC_vs_MS.Trt_F |
| HNRNPDL  | 0.00188 | 0.26565 | 0.636 | 0.51 | 1 | HC_vs_MS.Trt_F |
| KIF1B    | 0.00191 | 1.02637 | 0.844 | 0.74 | 1 | HC_vs_MS.Trt_F |
| PTBP1    | 0.00192 | 0.76494 | 0.303 | 0.2  | 1 | HC_vs_MS.Trt_F |
| EIF2S3   | 0.00193 | -0.4325 | 0.957 | 0.96 | 1 | HC_vs_MS.Trt_F |
| GRIA4    | 0.00193 | 0.41043 | 0.191 | 0.1  | 1 | HC_vs_MS.Trt_F |
| GAPDH    | 0.00193 | 0.2666  | 0.818 | 0.71 | 1 | HC_vs_MS.Trt_F |
| KDM5D    | 0.00195 | 1.9068  | 0.39  | 0.27 | 1 | HC_vs_MS.Trt_F |
| MPRIP    | 0.00197 | 0.77715 | 0.948 | 0.89 | 1 | HC_vs_MS.Trt_F |
| MRPS28   | 0.00197 | 0.29233 | 0.711 | 0.59 | 1 | HC_vs_MS.Trt_F |
| RASGEF1B | 0.00199 | 0.64483 | 0.812 | 0.7  | 1 | HC_vs_MS.Trt_F |
| TLDC1    | 0.002   | 0.53224 | 0.783 | 0.64 | 1 | HC_vs_MS.Trt_F |
| TOMM7    | 0.002   | 0.34423 | 0.564 | 0.44 | 1 | HC_vs_MS.Trt_F |
| DHX30    | 0.00201 | 0.37323 | 0.734 | 0.63 | 1 | HC_vs_MS.Trt_F |
| PIGG     | 0.00201 | 0.56351 | 0.627 | 0.51 | 1 | HC_vs_MS.Trt_F |
| HOOK2    | 0.00201 | 0.34746 | 0.98  | 0.95 | 1 | HC_vs_MS.Trt_F |
| COL5A1   | 0.00202 | 1.02154 | 0.104 | 0.04 | 1 | HC_vs_MS.Trt_F |
| EMP2     | 0.00204 | 0.32614 | 0.957 | 0.91 | 1 | HC_vs_MS.Trt_F |
| POLR2G   | 0.00205 | 0.60647 | 0.237 | 0.14 | 1 | HC_vs_MS.Trt_F |
| MFSD6    | 0.00206 | 0.86444 | 0.249 | 0.15 | 1 | HC_vs_MS.Trt_F |
| PHYH     | 0.00207 | 0.68395 | 0.309 | 0.2  | 1 | HC_vs_MS.Trt_F |

|          |         |         |       |      |   |                |
|----------|---------|---------|-------|------|---|----------------|
| CPB1     | 0.0021  | 0.44064 | 0.569 | 0.45 | 1 | HC_vs_MS.Trt_F |
| ELK1     | 0.00213 | 0.36672 | 0.171 | 0.08 | 1 | HC_vs_MS.Trt_F |
| ACAD9    | 0.00213 | 0.56924 | 0.338 | 0.22 | 1 | HC_vs_MS.Trt_F |
| MCF2L2   | 0.00215 | 0.68164 | 0.962 | 0.94 | 1 | HC_vs_MS.Trt_F |
| NPHP4    | 0.00218 | 0.89568 | 0.145 | 0.07 | 1 | HC_vs_MS.Trt_F |
| GRK4     | 0.00218 | 0.39016 | 0.653 | 0.53 | 1 | HC_vs_MS.Trt_F |
| CLCN7    | 0.0022  | 0.65062 | 0.387 | 0.26 | 1 | HC_vs_MS.Trt_F |
| SLC25A45 | 0.00222 | -0.4515 | 0.951 | 0.98 | 1 | HC_vs_MS.Trt_F |
| SPC25    | 0.00225 | 0.39152 | 0.763 | 0.65 | 1 | HC_vs_MS.Trt_F |
| GNB1L    | 0.00226 | 0.88069 | 0.292 | 0.18 | 1 | HC_vs_MS.Trt_F |
| USP25    | 0.00226 | -0.8286 | 0.52  | 0.37 | 1 | HC_vs_MS.Trt_F |
| POU6F2   | 0.00226 | 0.29791 | 0.353 | 0.23 | 1 | HC_vs_MS.Trt_F |
| TMEM106A | 0.00227 | 0.45726 | 0.728 | 0.65 | 1 | HC_vs_MS.Trt_F |
| MYCBP2   | 0.00229 | 0.33341 | 0.465 | 0.34 | 1 | HC_vs_MS.Trt_F |
| HK1      | 0.00229 | 0.26933 | 0.647 | 0.52 | 1 | HC_vs_MS.Trt_F |
| GNL2     | 0.0023  | 0.32914 | 0.76  | 0.66 | 1 | HC_vs_MS.Trt_F |
| TRPM7    | 0.0023  | 0.88375 | 0.934 | 0.91 | 1 | HC_vs_MS.Trt_F |
| MNS1     | 0.0023  | 0.42342 | 0.234 | 0.14 | 1 | HC_vs_MS.Trt_F |
| ADGRE5   | 0.00232 | 0.47338 | 0.734 | 0.6  | 1 | HC_vs_MS.Trt_F |
| GCN1     | 0.00232 | 0.78365 | 0.217 | 0.12 | 1 | HC_vs_MS.Trt_F |
| BICDL1   | 0.00232 | 0.95955 | 0.662 | 0.58 | 1 | HC_vs_MS.Trt_F |
| GSTM3    | 0.00232 | 0.44027 | 0.598 | 0.47 | 1 | HC_vs_MS.Trt_F |
| ITGB1    | 0.00233 | -0.6736 | 0.592 | 0.64 | 1 | HC_vs_MS.Trt_F |
| ZNF398   | 0.00233 | 0.83542 | 0.269 | 0.17 | 1 | HC_vs_MS.Trt_F |
| STRN4    | 0.00234 | 0.40198 | 0.598 | 0.48 | 1 | HC_vs_MS.Trt_F |
| SUSD3    | 0.00236 | -0.7574 | 0.298 | 0.4  | 1 | HC_vs_MS.Trt_F |
| KIF27    | 0.00238 | -0.5144 | 0.474 | 0.35 | 1 | HC_vs_MS.Trt_F |
| KLHL33   | 0.00238 | 0.40268 | 0.59  | 0.48 | 1 | HC_vs_MS.Trt_F |
| KARS     | 0.00239 | 0.30737 | 0.332 | 0.21 | 1 | HC_vs_MS.Trt_F |
| ATP2B4   | 0.00243 | 0.4398  | 0.578 | 0.44 | 1 | HC_vs_MS.Trt_F |
| RERE     | 0.00244 | 0.55003 | 0.451 | 0.33 | 1 | HC_vs_MS.Trt_F |
| STXBP2   | 0.00245 | 0.97255 | 0.321 | 0.22 | 1 | HC_vs_MS.Trt_F |
| U2SURP   | 0.00246 | 0.41687 | 0.364 | 0.25 | 1 | HC_vs_MS.Trt_F |
| GSTM4    | 0.00248 | 0.38874 | 0.211 | 0.12 | 1 | HC_vs_MS.Trt_F |
| PRDX4    | 0.00249 | 0.70764 | 0.176 | 0.09 | 1 | HC_vs_MS.Trt_F |
| ALDH3B1  | 0.0025  | 0.30348 | 0.809 | 0.75 | 1 | HC_vs_MS.Trt_F |
| PAX6     | 0.00251 | 0.43348 | 0.396 | 0.28 | 1 | HC_vs_MS.Trt_F |
| ULK3     | 0.00251 | 0.37375 | 0.251 | 0.14 | 1 | HC_vs_MS.Trt_F |
| EPB41L2  | 0.00253 | 0.34458 | 0.214 | 0.12 | 1 | HC_vs_MS.Trt_F |
| ZBTB40   | 0.00253 | 0.65066 | 0.526 | 0.4  | 1 | HC_vs_MS.Trt_F |

|          |         |         |       |      |   |                |
|----------|---------|---------|-------|------|---|----------------|
| PRPF40A  | 0.00255 | 0.38801 | 0.587 | 0.46 | 1 | HC_vs_MS.Trt_F |
| PCM1     | 0.00256 | 0.45999 | 0.887 | 0.78 | 1 | HC_vs_MS.Trt_F |
| YIPF6    | 0.00256 | 0.48175 | 0.908 | 0.82 | 1 | HC_vs_MS.Trt_F |
| TBC1D20  | 0.00257 | 0.50573 | 0.694 | 0.58 | 1 | HC_vs_MS.Trt_F |
| HSPA1B   | 0.00257 | 0.33657 | 0.329 | 0.21 | 1 | HC_vs_MS.Trt_F |
| LRCH4    | 0.00258 | 0.45979 | 0.575 | 0.45 | 1 | HC_vs_MS.Trt_F |
| ARAF     | 0.00259 | 0.30093 | 0.24  | 0.14 | 1 | HC_vs_MS.Trt_F |
| MSI2     | 0.00259 | 0.95831 | 0.942 | 0.86 | 1 | HC_vs_MS.Trt_F |
| ADSS     | 0.0026  | 0.34284 | 0.231 | 0.14 | 1 | HC_vs_MS.Trt_F |
| JAZF1    | 0.0026  | 1.12812 | 0.194 | 0.11 | 1 | HC_vs_MS.Trt_F |
| BCL6     | 0.00263 | 0.92526 | 0.191 | 0.1  | 1 | HC_vs_MS.Trt_F |
| PHLDA1   | 0.00265 | 0.64092 | 0.624 | 0.53 | 1 | HC_vs_MS.Trt_F |
| TMX1     | 0.00266 | 0.49633 | 0.497 | 0.37 | 1 | HC_vs_MS.Trt_F |
| CNOT6    | 0.00267 | 1.03529 | 0.182 | 0.09 | 1 | HC_vs_MS.Trt_F |
| SYMPK    | 0.00268 | 0.49576 | 0.922 | 0.86 | 1 | HC_vs_MS.Trt_F |
| POLR2I   | 0.00271 | 0.5953  | 0.231 | 0.13 | 1 | HC_vs_MS.Trt_F |
| PRKAG2   | 0.00272 | 0.78639 | 0.422 | 0.31 | 1 | HC_vs_MS.Trt_F |
| IDE      | 0.00272 | 0.63601 | 0.564 | 0.44 | 1 | HC_vs_MS.Trt_F |
| TTC39A   | 0.00272 | 0.29805 | 0.376 | 0.27 | 1 | HC_vs_MS.Trt_F |
| REEP3    | 0.00273 | -2.0319 | 0.486 | 0.53 | 1 | HC_vs_MS.Trt_F |
| CTNND1   | 0.00273 | 0.68908 | 0.483 | 0.36 | 1 | HC_vs_MS.Trt_F |
| KHDRBS1  | 0.00276 | 0.42059 | 0.24  | 0.14 | 1 | HC_vs_MS.Trt_F |
| CTDSPL   | 0.00276 | 0.55258 | 0.335 | 0.22 | 1 | HC_vs_MS.Trt_F |
| TXNRD2   | 0.00276 | 0.52433 | 0.925 | 0.83 | 1 | HC_vs_MS.Trt_F |
| MAPK8    | 0.00277 | 0.49498 | 0.497 | 0.37 | 1 | HC_vs_MS.Trt_F |
| PTTG1IP  | 0.00277 | 0.60377 | 0.254 | 0.16 | 1 | HC_vs_MS.Trt_F |
| PSMB7    | 0.00278 | 0.37107 | 0.277 | 0.18 | 1 | HC_vs_MS.Trt_F |
| TTL      | 0.00279 | 0.27011 | 0.939 | 0.88 | 1 | HC_vs_MS.Trt_F |
| SAMD15   | 0.00279 | 0.27306 | 0.361 | 0.25 | 1 | HC_vs_MS.Trt_F |
| LPCAT4   | 0.00279 | 0.26807 | 0.439 | 0.32 | 1 | HC_vs_MS.Trt_F |
| KIAA2026 | 0.0028  | 0.64122 | 0.269 | 0.17 | 1 | HC_vs_MS.Trt_F |
| DUSP10   | 0.00283 | 0.83671 | 0.335 | 0.22 | 1 | HC_vs_MS.Trt_F |
| HNF4G    | 0.00284 | 0.44077 | 0.329 | 0.22 | 1 | HC_vs_MS.Trt_F |
| LYPLA2   | 0.00285 | 0.65052 | 0.208 | 0.12 | 1 | HC_vs_MS.Trt_F |
| USP9X    | 0.00286 | 0.2719  | 0.645 | 0.53 | 1 | HC_vs_MS.Trt_F |
| ESYT2    | 0.00286 | 0.2524  | 0.668 | 0.56 | 1 | HC_vs_MS.Trt_F |
| MED26    | 0.00287 | 2.24686 | 0.124 | 0.06 | 1 | HC_vs_MS.Trt_F |
| SPTLC3   | 0.00293 | 0.61254 | 0.575 | 0.48 | 1 | HC_vs_MS.Trt_F |
| GON4L    | 0.00294 | 0.52594 | 0.887 | 0.84 | 1 | HC_vs_MS.Trt_F |
| PARBP    | 0.00294 | -1.1594 | 0.465 | 0.34 | 1 | HC_vs_MS.Trt_F |

|            |         |         |       |      |   |                |
|------------|---------|---------|-------|------|---|----------------|
| WSB1       | 0.00295 | 0.4369  | 0.899 | 0.83 | 1 | HC_vs_MS.Trt_F |
| SCAMP4     | 0.00295 | 0.41884 | 0.908 | 0.89 | 1 | HC_vs_MS.Trt_F |
| ZBTB16     | 0.00295 | 1.15229 | 0.442 | 0.33 | 1 | HC_vs_MS.Trt_F |
| ICAM1      | 0.00298 | 0.4424  | 0.555 | 0.42 | 1 | HC_vs_MS.Trt_F |
| PIEZO1     | 0.00298 | 0.38248 | 0.448 | 0.32 | 1 | HC_vs_MS.Trt_F |
| SZT2       | 0.00299 | 0.322   | 0.884 | 0.81 | 1 | HC_vs_MS.Trt_F |
| MAPK6      | 0.00303 | -1.0844 | 0.54  | 0.42 | 1 | HC_vs_MS.Trt_F |
| CSF3R      | 0.00303 | 0.81987 | 0.711 | 0.58 | 1 | HC_vs_MS.Trt_F |
| PTGER4     | 0.00304 | 0.33699 | 0.277 | 0.17 | 1 | HC_vs_MS.Trt_F |
| UNKL       | 0.00305 | -0.5808 | 0.379 | 0.48 | 1 | HC_vs_MS.Trt_F |
| PIK3R5     | 0.00306 | 0.37803 | 0.422 | 0.29 | 1 | HC_vs_MS.Trt_F |
| MAPRE2     | 0.00308 | 0.54657 | 0.338 | 0.24 | 1 | HC_vs_MS.Trt_F |
| DMAP1      | 0.00308 | 0.38046 | 0.572 | 0.43 | 1 | HC_vs_MS.Trt_F |
| CD55       | 0.00311 | 0.5458  | 0.633 | 0.54 | 1 | HC_vs_MS.Trt_F |
| ZNF623     | 0.00311 | 0.42782 | 0.72  | 0.63 | 1 | HC_vs_MS.Trt_F |
| PTRF       | 0.00312 | 0.53193 | 0.474 | 0.35 | 1 | HC_vs_MS.Trt_F |
| EIF1B      | 0.00312 | 0.49957 | 0.246 | 0.15 | 1 | HC_vs_MS.Trt_F |
| ZMYM2      | 0.00315 | 0.40711 | 0.454 | 0.34 | 1 | HC_vs_MS.Trt_F |
| TAGAP      | 0.00316 | 0.54789 | 0.353 | 0.25 | 1 | HC_vs_MS.Trt_F |
| HACD2      | 0.00317 | 0.28862 | 0.968 | 0.91 | 1 | HC_vs_MS.Trt_F |
| DCN        | 0.00321 | 0.82879 | 0.749 | 0.62 | 1 | HC_vs_MS.Trt_F |
| FAM118A    | 0.00321 | 0.67733 | 0.621 | 0.52 | 1 | HC_vs_MS.Trt_F |
| SFXN3      | 0.00322 | 0.49947 | 0.419 | 0.31 | 1 | HC_vs_MS.Trt_F |
| PIGP       | 0.00323 | 0.44198 | 0.835 | 0.78 | 1 | HC_vs_MS.Trt_F |
| AP006285.1 | 0.00327 | 0.29719 | 0.861 | 0.78 | 1 | HC_vs_MS.Trt_F |
| LYZ        | 0.0033  | 0.43286 | 0.503 | 0.37 | 1 | HC_vs_MS.Trt_F |
| CARD16     | 0.00331 | 0.28514 | 0.361 | 0.24 | 1 | HC_vs_MS.Trt_F |
| SHANK2     | 0.00331 | 0.37653 | 0.384 | 0.28 | 1 | HC_vs_MS.Trt_F |
| RNF8       | 0.00332 | 0.77632 | 0.561 | 0.45 | 1 | HC_vs_MS.Trt_F |
| GPR137C    | 0.00335 | 0.4032  | 0.63  | 0.55 | 1 | HC_vs_MS.Trt_F |
| PGD        | 0.00336 | 0.84275 | 0.194 | 0.1  | 1 | HC_vs_MS.Trt_F |
| NPIP6      | 0.00337 | 0.74295 | 0.289 | 0.19 | 1 | HC_vs_MS.Trt_F |
| TPCN2      | 0.00337 | 1.06197 | 0.682 | 0.59 | 1 | HC_vs_MS.Trt_F |
| PLOD2      | 0.00337 | 0.33856 | 0.439 | 0.34 | 1 | HC_vs_MS.Trt_F |
| TJP1       | 0.00338 | 1.00989 | 0.263 | 0.16 | 1 | HC_vs_MS.Trt_F |
| CCDC36     | 0.00341 | 0.26716 | 0.451 | 0.32 | 1 | HC_vs_MS.Trt_F |
| ARHGEF10   | 0.00345 | -0.7187 | 0.694 | 0.79 | 1 | HC_vs_MS.Trt_F |
| XPNPEP1    | 0.00346 | 0.3179  | 0.431 | 0.3  | 1 | HC_vs_MS.Trt_F |
| NFX1       | 0.00347 | 0.35277 | 0.899 | 0.78 | 1 | HC_vs_MS.Trt_F |
| SH2B1      | 0.00348 | 0.43947 | 0.642 | 0.51 | 1 | HC_vs_MS.Trt_F |

|            |         |         |       |      |   |                |
|------------|---------|---------|-------|------|---|----------------|
| ADK        | 0.00349 | 0.56643 | 0.289 | 0.19 | 1 | HC_vs_MS.Trt_F |
| CXCR4      | 0.0035  | 0.59373 | 0.37  | 0.27 | 1 | HC_vs_MS.Trt_F |
| ITPR3      | 0.0035  | 1.54602 | 0.205 | 0.12 | 1 | HC_vs_MS.Trt_F |
| 3-Mar      | 0.00352 | 0.58582 | 0.396 | 0.27 | 1 | HC_vs_MS.Trt_F |
| PHF12      | 0.00355 | 0.39766 | 0.757 | 0.66 | 1 | HC_vs_MS.Trt_F |
| AP2A2      | 0.0036  | 0.32045 | 0.757 | 0.63 | 1 | HC_vs_MS.Trt_F |
| CITED2     | 0.00361 | 1.07456 | 0.249 | 0.16 | 1 | HC_vs_MS.Trt_F |
| NPIP15     | 0.00363 | -0.9856 | 0.237 | 0.33 | 1 | HC_vs_MS.Trt_F |
| MAN1A2     | 0.00363 | 0.28327 | 0.367 | 0.25 | 1 | HC_vs_MS.Trt_F |
| CH507-42P1 | 0.00366 | 1.12486 | 0.257 | 0.17 | 1 | HC_vs_MS.Trt_F |
| SERPINB9   | 0.00367 | -0.3302 | 0.708 | 0.8  | 1 | HC_vs_MS.Trt_F |
| NUDCD1     | 0.00368 | 1.34908 | 0.162 | 0.08 | 1 | HC_vs_MS.Trt_F |
| NSMCE2     | 0.00371 | 0.28434 | 0.647 | 0.54 | 1 | HC_vs_MS.Trt_F |
| FSBP       | 0.00371 | 0.70947 | 0.384 | 0.27 | 1 | HC_vs_MS.Trt_F |
| SGMS1      | 0.00375 | 0.631   | 0.286 | 0.18 | 1 | HC_vs_MS.Trt_F |
| KATNAL1    | 0.00376 | 0.93559 | 0.613 | 0.52 | 1 | HC_vs_MS.Trt_F |
| OGDH       | 0.00378 | 0.27042 | 0.595 | 0.46 | 1 | HC_vs_MS.Trt_F |
| NUP214     | 0.0038  | 0.36654 | 0.694 | 0.62 | 1 | HC_vs_MS.Trt_F |
| TAOK2      | 0.00381 | -0.2887 | 0.179 | 0.09 | 1 | HC_vs_MS.Trt_F |
| RUNDC3B    | 0.00383 | 0.4086  | 0.309 | 0.21 | 1 | HC_vs_MS.Trt_F |
| PLAUR      | 0.00383 | 1.79111 | 0.647 | 0.56 | 1 | HC_vs_MS.Trt_F |
| STK17B     | 0.00385 | -0.4904 | 0.948 | 0.94 | 1 | HC_vs_MS.Trt_F |
| CLEC2D     | 0.00388 | -0.5661 | 0.803 | 0.83 | 1 | HC_vs_MS.Trt_F |
| ARFGEF1    | 0.00389 | 0.30342 | 0.697 | 0.57 | 1 | HC_vs_MS.Trt_F |
| SPON2      | 0.00389 | 0.94912 | 0.488 | 0.37 | 1 | HC_vs_MS.Trt_F |
| AKAP6      | 0.0039  | -0.4409 | 0.777 | 0.66 | 1 | HC_vs_MS.Trt_F |
| IL21R      | 0.00393 | 0.60111 | 0.645 | 0.52 | 1 | HC_vs_MS.Trt_F |
| MTMR10     | 0.00395 | 1.15077 | 0.272 | 0.18 | 1 | HC_vs_MS.Trt_F |
| BRD1       | 0.00396 | 0.84111 | 0.199 | 0.12 | 1 | HC_vs_MS.Trt_F |
| ATXN2L     | 0.00396 | 1.40931 | 0.298 | 0.21 | 1 | HC_vs_MS.Trt_F |
| AACS       | 0.00397 | 0.39749 | 0.991 | 1    | 1 | HC_vs_MS.Trt_F |
| C1orf158   | 0.00398 | -0.5282 | 0.777 | 0.88 | 1 | HC_vs_MS.Trt_F |
| LHFP       | 0.00399 | 0.29673 | 0.26  | 0.17 | 1 | HC_vs_MS.Trt_F |
| FGL2       | 0.004   | 0.83324 | 0.396 | 0.29 | 1 | HC_vs_MS.Trt_F |
| NBAS       | 0.00401 | 0.99877 | 0.251 | 0.16 | 1 | HC_vs_MS.Trt_F |
| STK33      | 0.00401 | 0.31216 | 0.893 | 0.82 | 1 | HC_vs_MS.Trt_F |
| COPA       | 0.00405 | -0.2614 | 0.35  | 0.23 | 1 | HC_vs_MS.Trt_F |
| MRPS5      | 0.00405 | 0.26995 | 0.832 | 0.74 | 1 | HC_vs_MS.Trt_F |
| MLANA      | 0.00406 | 0.32816 | 0.506 | 0.39 | 1 | HC_vs_MS.Trt_F |
| ANKRD17    | 0.00406 | 0.98361 | 0.295 | 0.2  | 1 | HC_vs_MS.Trt_F |

|            |         |         |       |      |   |                |
|------------|---------|---------|-------|------|---|----------------|
| STARD8     | 0.00413 | 0.45009 | 0.76  | 0.67 | 1 | HC_vs_MS.Trt_F |
| GALK1      | 0.00415 | 0.64077 | 0.402 | 0.28 | 1 | HC_vs_MS.Trt_F |
| TRAPPC3L   | 0.0042  | 0.28212 | 0.616 | 0.48 | 1 | HC_vs_MS.Trt_F |
| STIL       | 0.00423 | 0.31984 | 0.668 | 0.55 | 1 | HC_vs_MS.Trt_F |
| OTUD4      | 0.00425 | 0.67411 | 0.699 | 0.6  | 1 | HC_vs_MS.Trt_F |
| MED28      | 0.00429 | 0.47575 | 0.91  | 0.87 | 1 | HC_vs_MS.Trt_F |
| RALGDS     | 0.00429 | 0.62441 | 0.373 | 0.27 | 1 | HC_vs_MS.Trt_F |
| MBD6       | 0.00432 | 0.78746 | 0.329 | 0.23 | 1 | HC_vs_MS.Trt_F |
| ANP32A     | 0.00436 | 0.72776 | 0.312 | 0.21 | 1 | HC_vs_MS.Trt_F |
| SNU13      | 0.00438 | 0.25678 | 0.324 | 0.22 | 1 | HC_vs_MS.Trt_F |
| JRK        | 0.00438 | 1.33191 | 0.483 | 0.35 | 1 | HC_vs_MS.Trt_F |
| RP11-449H3 | 0.00441 | 0.9944  | 0.341 | 0.23 | 1 | HC_vs_MS.Trt_F |
| ZNF789     | 0.00443 | -1.0495 | 0.734 | 0.8  | 1 | HC_vs_MS.Trt_F |
| DCTN4      | 0.00444 | 0.40768 | 0.399 | 0.29 | 1 | HC_vs_MS.Trt_F |
| NCALD      | 0.00444 | -0.3224 | 0.78  | 0.65 | 1 | HC_vs_MS.Trt_F |
| CDHR3      | 0.00448 | 0.39549 | 0.676 | 0.51 | 1 | HC_vs_MS.Trt_F |
| HLA-DPA1   | 0.00453 | 0.28352 | 0.309 | 0.2  | 1 | HC_vs_MS.Trt_F |
| AKNA       | 0.00454 | 0.3562  | 0.925 | 0.9  | 1 | HC_vs_MS.Trt_F |
| SECISBP2L  | 0.00454 | 0.27523 | 0.792 | 0.68 | 1 | HC_vs_MS.Trt_F |
| LMCD1      | 0.00454 | 0.43904 | 0.37  | 0.27 | 1 | HC_vs_MS.Trt_F |
| TAB3       | 0.00454 | 1.09462 | 0.749 | 0.67 | 1 | HC_vs_MS.Trt_F |
| LETM1      | 0.00458 | -0.4693 | 0.838 | 0.89 | 1 | HC_vs_MS.Trt_F |
| PTP4A1     | 0.00465 | 0.41554 | 0.298 | 0.2  | 1 | HC_vs_MS.Trt_F |
| GIMAP1     | 0.00465 | 0.32034 | 0.509 | 0.38 | 1 | HC_vs_MS.Trt_F |
| MRPL43     | 0.0047  | 0.91448 | 0.185 | 0.1  | 1 | HC_vs_MS.Trt_F |
| NTRK1      | 0.0047  | 0.91525 | 0.249 | 0.16 | 1 | HC_vs_MS.Trt_F |
| PLP2       | 0.0048  | 0.3136  | 0.41  | 0.3  | 1 | HC_vs_MS.Trt_F |
| CUX1       | 0.0048  | 0.3686  | 0.358 | 0.25 | 1 | HC_vs_MS.Trt_F |
| MYL6       | 0.00481 | -0.3862 | 0.688 | 0.71 | 1 | HC_vs_MS.Trt_F |
| PPIP5K1    | 0.0049  | 0.41428 | 0.63  | 0.51 | 1 | HC_vs_MS.Trt_F |
| CIC        | 0.0049  | 0.93965 | 0.15  | 0.08 | 1 | HC_vs_MS.Trt_F |
| ARHGAP33   | 0.00492 | 1.11964 | 0.197 | 0.12 | 1 | HC_vs_MS.Trt_F |
| NDE1       | 0.00492 | 0.44016 | 0.812 | 0.72 | 1 | HC_vs_MS.Trt_F |
| SP2        | 0.00493 | 1.36104 | 0.384 | 0.28 | 1 | HC_vs_MS.Trt_F |
| GIMAP7     | 0.00494 | -0.5381 | 0.41  | 0.49 | 1 | HC_vs_MS.Trt_F |
| CCT6A      | 0.00495 | -0.2502 | 0.63  | 0.46 | 1 | HC_vs_MS.Trt_F |
| MAGI1      | 0.00497 | 0.29397 | 0.133 | 0.07 | 1 | HC_vs_MS.Trt_F |
| SPNS1      | 0.00498 | 0.59507 | 0.87  | 0.76 | 1 | HC_vs_MS.Trt_F |
| ZNF595     | 0.00499 | 0.43084 | 0.858 | 0.83 | 1 | HC_vs_MS.Trt_F |
| ADAMTSL3   | 0.005   | 0.35039 | 0.98  | 0.89 | 1 | HC_vs_MS.Trt_F |

|            |         |         |       |      |   |                |
|------------|---------|---------|-------|------|---|----------------|
| MBOAT2     | 0.00508 | 0.71333 | 0.379 | 0.26 | 1 | HC_vs_MS.Trt_F |
| SUOX       | 0.00511 | 0.46536 | 0.835 | 0.78 | 1 | HC_vs_MS.Trt_F |
| ZC3H12D    | 0.00514 | 0.50447 | 0.876 | 0.82 | 1 | HC_vs_MS.Trt_F |
| DUSP28     | 0.00515 | 0.28986 | 0.754 | 0.64 | 1 | HC_vs_MS.Trt_F |
| LTA4H      | 0.00521 | 0.40495 | 0.393 | 0.27 | 1 | HC_vs_MS.Trt_F |
| AP3B1      | 0.00522 | -0.3227 | 0.486 | 0.35 | 1 | HC_vs_MS.Trt_F |
| RFX7       | 0.00524 | 0.54746 | 0.234 | 0.15 | 1 | HC_vs_MS.Trt_F |
| HOMER2     | 0.00526 | 0.32705 | 0.616 | 0.51 | 1 | HC_vs_MS.Trt_F |
| RORA       | 0.00527 | 0.35315 | 0.697 | 0.62 | 1 | HC_vs_MS.Trt_F |
| FAH        | 0.0053  | 1.39295 | 0.205 | 0.12 | 1 | HC_vs_MS.Trt_F |
| ST8SIA3    | 0.00533 | 0.27588 | 0.191 | 0.11 | 1 | HC_vs_MS.Trt_F |
| CD47       | 0.00536 | -0.5299 | 0.887 | 0.88 | 1 | HC_vs_MS.Trt_F |
| PAM16      | 0.00536 | 1.08214 | 0.237 | 0.14 | 1 | HC_vs_MS.Trt_F |
| C2orf68    | 0.00538 | -0.8746 | 0.829 | 0.83 | 1 | HC_vs_MS.Trt_F |
| HN1        | 0.00541 | 0.33801 | 0.812 | 0.73 | 1 | HC_vs_MS.Trt_F |
| GBF1       | 0.00545 | 0.46813 | 0.243 | 0.15 | 1 | HC_vs_MS.Trt_F |
| PPP5C      | 0.0055  | 0.47546 | 0.558 | 0.44 | 1 | HC_vs_MS.Trt_F |
| AMPD2      | 0.00551 | 1.35208 | 0.165 | 0.09 | 1 | HC_vs_MS.Trt_F |
| MRPS26     | 0.00553 | 0.53173 | 0.194 | 0.11 | 1 | HC_vs_MS.Trt_F |
| PINLYP     | 0.00567 | 0.25216 | 0.621 | 0.51 | 1 | HC_vs_MS.Trt_F |
| HLA-DOA    | 0.00569 | 0.52023 | 0.743 | 0.6  | 1 | HC_vs_MS.Trt_F |
| GSK3B      | 0.00575 | 0.91059 | 0.766 | 0.68 | 1 | HC_vs_MS.Trt_F |
| FAM13B     | 0.00582 | 0.6284  | 0.48  | 0.37 | 1 | HC_vs_MS.Trt_F |
| 9-Sep      | 0.00585 | 0.56896 | 0.549 | 0.45 | 1 | HC_vs_MS.Trt_F |
| FAN1       | 0.00586 | -0.5175 | 0.309 | 0.21 | 1 | HC_vs_MS.Trt_F |
| ATAT1      | 0.00589 | 0.8652  | 0.121 | 0.06 | 1 | HC_vs_MS.Trt_F |
| KIF18A     | 0.00594 | -0.2849 | 0.405 | 0.29 | 1 | HC_vs_MS.Trt_F |
| HSPA1A     | 0.00598 | 0.6168  | 0.263 | 0.17 | 1 | HC_vs_MS.Trt_F |
| GCLM       | 0.00598 | 0.39192 | 0.746 | 0.67 | 1 | HC_vs_MS.Trt_F |
| ACVR2B     | 0.006   | 0.70618 | 0.491 | 0.4  | 1 | HC_vs_MS.Trt_F |
| NUDCD3     | 0.006   | 0.29719 | 0.344 | 0.24 | 1 | HC_vs_MS.Trt_F |
| RBBP9      | 0.00601 | 1.57793 | 0.486 | 0.38 | 1 | HC_vs_MS.Trt_F |
| AC024592.1 | 0.00607 | 1.00937 | 0.376 | 0.28 | 1 | HC_vs_MS.Trt_F |
| GBP4       | 0.00608 | 0.4344  | 0.838 | 0.72 | 1 | HC_vs_MS.Trt_F |
| ACSL4      | 0.00611 | 0.65887 | 0.217 | 0.13 | 1 | HC_vs_MS.Trt_F |
| TUBGCP2    | 0.00611 | 0.25066 | 0.801 | 0.72 | 1 | HC_vs_MS.Trt_F |
| DPY19L3    | 0.00611 | 0.25543 | 0.934 | 0.9  | 1 | HC_vs_MS.Trt_F |
| ARHGAP10   | 0.00615 | 0.68287 | 0.182 | 0.1  | 1 | HC_vs_MS.Trt_F |
| LGALS8     | 0.00615 | 0.43334 | 0.708 | 0.59 | 1 | HC_vs_MS.Trt_F |
| TNKS1BP1   | 0.00615 | 0.61469 | 0.118 | 0.06 | 1 | HC_vs_MS.Trt_F |

|          |         |         |       |      |   |                |
|----------|---------|---------|-------|------|---|----------------|
| ATG2A    | 0.00617 | 0.54006 | 0.801 | 0.71 | 1 | HC_vs_MS.Trt_F |
| EXOSC10  | 0.00617 | 0.41045 | 0.893 | 0.8  | 1 | HC_vs_MS.Trt_F |
| NCBP1    | 0.00618 | 0.78649 | 0.688 | 0.6  | 1 | HC_vs_MS.Trt_F |
| ECSIT    | 0.00618 | 0.64907 | 0.327 | 0.23 | 1 | HC_vs_MS.Trt_F |
| THAP4    | 0.00618 | 0.56239 | 0.185 | 0.1  | 1 | HC_vs_MS.Trt_F |
| TANC2    | 0.00622 | -0.994  | 0.327 | 0.22 | 1 | HC_vs_MS.Trt_F |
| AP3M2    | 0.00623 | 0.55551 | 0.208 | 0.12 | 1 | HC_vs_MS.Trt_F |
| TRNT1    | 0.00623 | 0.50663 | 0.396 | 0.28 | 1 | HC_vs_MS.Trt_F |
| ADORA2A  | 0.00635 | 0.79095 | 0.237 | 0.15 | 1 | HC_vs_MS.Trt_F |
| ILF3     | 0.00641 | 0.26759 | 0.803 | 0.72 | 1 | HC_vs_MS.Trt_F |
| ZNF544   | 0.00644 | 0.26251 | 0.954 | 0.92 | 1 | HC_vs_MS.Trt_F |
| YIPF5    | 0.00649 | 1.01818 | 0.569 | 0.5  | 1 | HC_vs_MS.Trt_F |
| NCK2     | 0.0065  | 0.91276 | 0.292 | 0.2  | 1 | HC_vs_MS.Trt_F |
| RPLP1    | 0.00657 | -0.2594 | 0.939 | 0.96 | 1 | HC_vs_MS.Trt_F |
| CALM1    | 0.00658 | -0.3845 | 0.803 | 0.8  | 1 | HC_vs_MS.Trt_F |
| TLR2     | 0.00659 | 0.33803 | 0.156 | 0.09 | 1 | HC_vs_MS.Trt_F |
| ZNF638   | 0.00663 | 0.30166 | 0.448 | 0.33 | 1 | HC_vs_MS.Trt_F |
| HSD17B8  | 0.00664 | -0.2901 | 0.153 | 0.08 | 1 | HC_vs_MS.Trt_F |
| METTL23  | 0.00667 | 0.38555 | 0.243 | 0.16 | 1 | HC_vs_MS.Trt_F |
| METTL22  | 0.00668 | 0.98136 | 0.705 | 0.62 | 1 | HC_vs_MS.Trt_F |
| CCT2     | 0.00668 | -0.2846 | 0.899 | 0.8  | 1 | HC_vs_MS.Trt_F |
| ATR      | 0.00669 | 0.32687 | 0.561 | 0.44 | 1 | HC_vs_MS.Trt_F |
| ATIC     | 0.00673 | 0.27763 | 0.451 | 0.34 | 1 | HC_vs_MS.Trt_F |
| SLC4A8   | 0.00674 | 0.39724 | 0.948 | 0.93 | 1 | HC_vs_MS.Trt_F |
| RGPD8    | 0.00675 | 0.79226 | 0.327 | 0.23 | 1 | HC_vs_MS.Trt_F |
| ALDH16A1 | 0.00676 | 0.3184  | 0.702 | 0.63 | 1 | HC_vs_MS.Trt_F |
| ITPK1    | 0.00679 | 0.31584 | 0.673 | 0.55 | 1 | HC_vs_MS.Trt_F |
| PTEN     | 0.0068  | -1.2151 | 0.468 | 0.52 | 1 | HC_vs_MS.Trt_F |
| DMTF1    | 0.00682 | 0.50773 | 0.595 | 0.5  | 1 | HC_vs_MS.Trt_F |
| CPD      | 0.00683 | 0.5737  | 0.743 | 0.65 | 1 | HC_vs_MS.Trt_F |
| CES2     | 0.00687 | -0.6997 | 0.422 | 0.31 | 1 | HC_vs_MS.Trt_F |
| FUS      | 0.00699 | 0.56266 | 0.85  | 0.84 | 1 | HC_vs_MS.Trt_F |
| TLN1     | 0.00701 | 0.35938 | 0.685 | 0.57 | 1 | HC_vs_MS.Trt_F |
| NLE1     | 0.00703 | 1.3405  | 0.321 | 0.22 | 1 | HC_vs_MS.Trt_F |
| PI4KB    | 0.00707 | 0.54932 | 0.251 | 0.16 | 1 | HC_vs_MS.Trt_F |
| EGR3     | 0.00709 | 0.74133 | 0.28  | 0.19 | 1 | HC_vs_MS.Trt_F |
| C2orf42  | 0.00713 | 0.40851 | 0.182 | 0.1  | 1 | HC_vs_MS.Trt_F |
| PML      | 0.00714 | 0.2782  | 0.728 | 0.6  | 1 | HC_vs_MS.Trt_F |
| ZNF253   | 0.00717 | -0.5257 | 0.754 | 0.83 | 1 | HC_vs_MS.Trt_F |
| MCAM     | 0.00718 | 1.47166 | 0.598 | 0.47 | 1 | HC_vs_MS.Trt_F |



|           |         |         |       |      |   |                |
|-----------|---------|---------|-------|------|---|----------------|
| PPIL3     | 0.0072  | -0.3479 | 0.841 | 0.73 | 1 | HC_vs_MS.Trt_F |
| LDHA      | 0.00721 | 0.53646 | 0.754 | 0.66 | 1 | HC_vs_MS.Trt_F |
| KDM4B     | 0.00726 | 0.75969 | 0.697 | 0.59 | 1 | HC_vs_MS.Trt_F |
| PUS7L     | 0.00728 | 0.46053 | 0.91  | 0.87 | 1 | HC_vs_MS.Trt_F |
| IL7R      | 0.00732 | 0.25139 | 0.905 | 0.9  | 1 | HC_vs_MS.Trt_F |
| PRR3      | 0.00733 | 0.52409 | 0.855 | 0.78 | 1 | HC_vs_MS.Trt_F |
| SKP2      | 0.00736 | -0.4024 | 0.616 | 0.49 | 1 | HC_vs_MS.Trt_F |
| CCDC80    | 0.00737 | 0.89157 | 0.783 | 0.7  | 1 | HC_vs_MS.Trt_F |
| ZCCHC2    | 0.00738 | 2.52059 | 0.139 | 0.07 | 1 | HC_vs_MS.Trt_F |
| CD300LG   | 0.00741 | 0.47296 | 0.523 | 0.44 | 1 | HC_vs_MS.Trt_F |
| FPGS      | 0.00747 | 0.31698 | 0.234 | 0.14 | 1 | HC_vs_MS.Trt_F |
| ZNF831    | 0.00747 | 0.33942 | 0.324 | 0.22 | 1 | HC_vs_MS.Trt_F |
| RBM14     | 0.00751 | 0.28358 | 0.251 | 0.16 | 1 | HC_vs_MS.Trt_F |
| MATK      | 0.00753 | -0.2891 | 0.662 | 0.56 | 1 | HC_vs_MS.Trt_F |
| NEMP1     | 0.00754 | 1.34488 | 0.147 | 0.08 | 1 | HC_vs_MS.Trt_F |
| ARHGEF39  | 0.00754 | 0.84324 | 0.737 | 0.62 | 1 | HC_vs_MS.Trt_F |
| KCTD7     | 0.00755 | 0.49635 | 0.303 | 0.21 | 1 | HC_vs_MS.Trt_F |
| LMAN2L    | 0.00759 | 0.5613  | 0.107 | 0.05 | 1 | HC_vs_MS.Trt_F |
| TBCK      | 0.00759 | 0.60729 | 0.679 | 0.62 | 1 | HC_vs_MS.Trt_F |
| INIP      | 0.0076  | -0.4375 | 0.757 | 0.6  | 1 | HC_vs_MS.Trt_F |
| RUNDC3A   | 0.00761 | 0.46662 | 0.564 | 0.47 | 1 | HC_vs_MS.Trt_F |
| EIF4G2    | 0.00761 | -0.4994 | 0.552 | 0.6  | 1 | HC_vs_MS.Trt_F |
| ARL13B    | 0.00762 | 0.62386 | 0.251 | 0.16 | 1 | HC_vs_MS.Trt_F |
| TARBP1    | 0.00763 | 1.5107  | 0.477 | 0.37 | 1 | HC_vs_MS.Trt_F |
| MADD      | 0.00765 | 0.7939  | 0.283 | 0.19 | 1 | HC_vs_MS.Trt_F |
| AMZ2      | 0.0077  | 0.43999 | 0.656 | 0.53 | 1 | HC_vs_MS.Trt_F |
| PTK2B     | 0.00773 | 0.51707 | 0.491 | 0.38 | 1 | HC_vs_MS.Trt_F |
| IQSEC1    | 0.00775 | 0.68363 | 0.286 | 0.19 | 1 | HC_vs_MS.Trt_F |
| KLF2      | 0.0078  | 0.2764  | 0.26  | 0.17 | 1 | HC_vs_MS.Trt_F |
| KRR1      | 0.00784 | 0.59108 | 0.717 | 0.64 | 1 | HC_vs_MS.Trt_F |
| CEP19     | 0.00785 | -0.5465 | 0.708 | 0.63 | 1 | HC_vs_MS.Trt_F |
| DXO       | 0.00786 | 0.56034 | 0.171 | 0.1  | 1 | HC_vs_MS.Trt_F |
| ADRB2     | 0.00794 | -0.4667 | 0.309 | 0.21 | 1 | HC_vs_MS.Trt_F |
| CTTNBP2NL | 0.00795 | 0.5404  | 0.503 | 0.39 | 1 | HC_vs_MS.Trt_F |
| BCAS4     | 0.00797 | 0.30072 | 0.968 | 0.94 | 1 | HC_vs_MS.Trt_F |
| RUNX3     | 0.00797 | 0.29852 | 0.269 | 0.18 | 1 | HC_vs_MS.Trt_F |
| CEP350    | 0.00799 | 0.43458 | 0.405 | 0.3  | 1 | HC_vs_MS.Trt_F |
| PLA2G2C   | 0.00801 | 0.37046 | 0.581 | 0.49 | 1 | HC_vs_MS.Trt_F |
| CLEC17A   | 0.00802 | 0.62821 | 0.312 | 0.22 | 1 | HC_vs_MS.Trt_F |
| C2orf91   | 0.00803 | 0.4594  | 0.512 | 0.4  | 1 | HC_vs_MS.Trt_F |

|         |         |         |       |      |   |                |
|---------|---------|---------|-------|------|---|----------------|
| RUFY1   | 0.00809 | 0.99044 | 0.35  | 0.25 | 1 | HC_vs_MS.Trt_F |
| SFSWAP  | 0.0081  | 0.27976 | 0.61  | 0.52 | 1 | HC_vs_MS.Trt_F |
| PLEKHA3 | 0.0082  | 0.39446 | 0.835 | 0.76 | 1 | HC_vs_MS.Trt_F |
| ZFP36L2 | 0.00822 | 0.35028 | 0.595 | 0.49 | 1 | HC_vs_MS.Trt_F |
| HDAC4   | 0.00826 | 0.2707  | 0.601 | 0.53 | 1 | HC_vs_MS.Trt_F |
| DNAH1   | 0.0083  | 0.82132 | 0.211 | 0.13 | 1 | HC_vs_MS.Trt_F |
| NBPF3   | 0.00832 | 0.34726 | 0.488 | 0.4  | 1 | HC_vs_MS.Trt_F |
| PZP     | 0.00834 | 0.82067 | 0.15  | 0.08 | 1 | HC_vs_MS.Trt_F |
| EP300   | 0.00838 | 0.40716 | 0.78  | 0.66 | 1 | HC_vs_MS.Trt_F |
| EYS     | 0.0084  | 0.41486 | 0.801 | 0.75 | 1 | HC_vs_MS.Trt_F |
| PSMD7   | 0.00841 | 0.33873 | 0.37  | 0.27 | 1 | HC_vs_MS.Trt_F |
| IFIT1   | 0.00842 | 1.37184 | 0.312 | 0.21 | 1 | HC_vs_MS.Trt_F |
| CLIP4   | 0.00843 | 1.15549 | 0.162 | 0.09 | 1 | HC_vs_MS.Trt_F |
| STRN3   | 0.00846 | -0.6539 | 0.815 | 0.83 | 1 | HC_vs_MS.Trt_F |
| GSTZ1   | 0.00848 | 0.61719 | 0.595 | 0.48 | 1 | HC_vs_MS.Trt_F |
| CST3    | 0.00849 | 1.58054 | 0.153 | 0.09 | 1 | HC_vs_MS.Trt_F |
| CCDC141 | 0.0085  | 0.55311 | 0.702 | 0.65 | 1 | HC_vs_MS.Trt_F |
| MECR    | 0.00858 | 0.45981 | 0.405 | 0.28 | 1 | HC_vs_MS.Trt_F |
| ZNF396  | 0.00858 | 0.29632 | 0.896 | 0.82 | 1 | HC_vs_MS.Trt_F |
| MMRN2   | 0.00858 | 0.70475 | 0.249 | 0.16 | 1 | HC_vs_MS.Trt_F |
| SEC14L6 | 0.0086  | 0.43149 | 0.798 | 0.7  | 1 | HC_vs_MS.Trt_F |
| ATAD5   | 0.00862 | 0.86507 | 0.618 | 0.5  | 1 | HC_vs_MS.Trt_F |
| PSMC1   | 0.00865 | 0.28733 | 0.454 | 0.34 | 1 | HC_vs_MS.Trt_F |
| CLK2    | 0.00872 | 0.86597 | 0.202 | 0.12 | 1 | HC_vs_MS.Trt_F |
| GNAQ    | 0.00877 | 0.60639 | 0.257 | 0.17 | 1 | HC_vs_MS.Trt_F |
| MAP4K5  | 0.00879 | 0.70535 | 0.601 | 0.48 | 1 | HC_vs_MS.Trt_F |
| MTHFD1  | 0.0088  | 0.41207 | 0.896 | 0.87 | 1 | HC_vs_MS.Trt_F |
| CALCRL  | 0.00882 | 0.36383 | 0.737 | 0.67 | 1 | HC_vs_MS.Trt_F |
| ZNF674  | 0.00882 | 0.55117 | 0.948 | 0.9  | 1 | HC_vs_MS.Trt_F |
| OBSCN   | 0.00882 | 0.47208 | 0.269 | 0.18 | 1 | HC_vs_MS.Trt_F |
| CCNL1   | 0.00884 | 0.38859 | 0.445 | 0.34 | 1 | HC_vs_MS.Trt_F |
| COL6A1  | 0.00884 | 2.02508 | 0.107 | 0.05 | 1 | HC_vs_MS.Trt_F |
| CDC42   | 0.00889 | -0.4989 | 0.905 | 0.91 | 1 | HC_vs_MS.Trt_F |
| FAM46C  | 0.00889 | 0.433   | 0.41  | 0.31 | 1 | HC_vs_MS.Trt_F |
| MAFF    | 0.00892 | 0.48373 | 0.723 | 0.62 | 1 | HC_vs_MS.Trt_F |
| RGPD2   | 0.00897 | 0.43391 | 0.243 | 0.16 | 1 | HC_vs_MS.Trt_F |
| ZNF799  | 0.00898 | -0.9024 | 0.471 | 0.37 | 1 | HC_vs_MS.Trt_F |
| SMIM12  | 0.00899 | 0.39071 | 0.818 | 0.74 | 1 | HC_vs_MS.Trt_F |
| SLC41A1 | 0.00901 | 0.84951 | 0.179 | 0.1  | 1 | HC_vs_MS.Trt_F |
| SAMD9   | 0.00902 | 0.41249 | 0.234 | 0.15 | 1 | HC_vs_MS.Trt_F |

|          |         |         |       |      |   |                |
|----------|---------|---------|-------|------|---|----------------|
| PPP2R2A  | 0.00906 | 1.24298 | 0.208 | 0.13 | 1 | HC_vs_MS.Trt_F |
| RBM6     | 0.00906 | -0.5176 | 0.858 | 0.87 | 1 | HC_vs_MS.Trt_F |
| TKFC     | 0.00909 | 0.29874 | 0.639 | 0.53 | 1 | HC_vs_MS.Trt_F |
| GOLM1    | 0.00909 | 1.06331 | 0.642 | 0.52 | 1 | HC_vs_MS.Trt_F |
| THG1L    | 0.00911 | -0.8707 | 0.621 | 0.54 | 1 | HC_vs_MS.Trt_F |
| NME3     | 0.00922 | 0.46598 | 0.185 | 0.11 | 1 | HC_vs_MS.Trt_F |
| TUBG2    | 0.00923 | 0.49081 | 0.147 | 0.08 | 1 | HC_vs_MS.Trt_F |
| FAM114A1 | 0.00927 | 0.49917 | 0.618 | 0.51 | 1 | HC_vs_MS.Trt_F |
| PREX1    | 0.00933 | 0.4864  | 0.613 | 0.52 | 1 | HC_vs_MS.Trt_F |
| POLR3E   | 0.00937 | 0.28847 | 0.474 | 0.4  | 1 | HC_vs_MS.Trt_F |
| CBS      | 0.00941 | -0.4136 | 0.162 | 0.24 | 1 | HC_vs_MS.Trt_F |
| ZEB1     | 0.00942 | 0.53391 | 0.624 | 0.5  | 1 | HC_vs_MS.Trt_F |
| S1PR4    | 0.00943 | 0.46752 | 0.231 | 0.15 | 1 | HC_vs_MS.Trt_F |
| PLEKHM3  | 0.00947 | 0.75233 | 0.584 | 0.48 | 1 | HC_vs_MS.Trt_F |
| G6PC2    | 0.00947 | 0.32006 | 0.379 | 0.28 | 1 | HC_vs_MS.Trt_F |
| TUT1     | 0.00948 | -0.5564 | 0.191 | 0.11 | 1 | HC_vs_MS.Trt_F |
| TNFRSF18 | 0.0095  | 0.6208  | 0.289 | 0.2  | 1 | HC_vs_MS.Trt_F |
| KCNC2    | 0.00958 | 0.37498 | 0.442 | 0.35 | 1 | HC_vs_MS.Trt_F |
| MCL1     | 0.00965 | 0.38764 | 0.462 | 0.35 | 1 | HC_vs_MS.Trt_F |
| HYPK     | 0.00965 | 0.58727 | 0.922 | 0.9  | 1 | HC_vs_MS.Trt_F |
| TLCD2    | 0.00967 | 0.37261 | 0.948 | 0.93 | 1 | HC_vs_MS.Trt_F |
| PARVB    | 0.00975 | 0.55089 | 0.749 | 0.69 | 1 | HC_vs_MS.Trt_F |
| CNBD2    | 0.00976 | 0.45511 | 0.543 | 0.44 | 1 | HC_vs_MS.Trt_F |
| GADL1    | 0.0098  | 0.27778 | 0.731 | 0.66 | 1 | HC_vs_MS.Trt_F |
| AFF1     | 0.00981 | 0.41844 | 0.39  | 0.28 | 1 | HC_vs_MS.Trt_F |
| IL1R1    | 0.00983 | -0.4334 | 0.422 | 0.32 | 1 | HC_vs_MS.Trt_F |
| VKORC1   | 0.00986 | 0.27077 | 0.214 | 0.13 | 1 | HC_vs_MS.Trt_F |
| SCAMP3   | 0.00989 | 0.658   | 0.251 | 0.17 | 1 | HC_vs_MS.Trt_F |
| SPICE1   | 0.00991 | 0.92539 | 0.324 | 0.23 | 1 | HC_vs_MS.Trt_F |
| TRIM44   | 0.00996 | -0.2641 | 0.387 | 0.28 | 1 | HC_vs_MS.Trt_F |
| UBE4B    | 0.00996 | 0.9159  | 0.659 | 0.55 | 1 | HC_vs_MS.Trt_F |
| SMAD1    | 0.00996 | -0.8336 | 0.442 | 0.33 | 1 | HC_vs_MS.Trt_F |
| GPM6A    | 0.00998 | 0.74884 | 0.355 | 0.26 | 1 | HC_vs_MS.Trt_F |
| CASP9    | 0.01002 | 0.54708 | 0.471 | 0.37 | 1 | HC_vs_MS.Trt_F |
| WWOX     | 0.01003 | 0.29257 | 0.286 | 0.19 | 1 | HC_vs_MS.Trt_F |
| COL4A2   | 0.01004 | 0.89625 | 0.121 | 0.06 | 1 | HC_vs_MS.Trt_F |
| RABL3    | 0.01004 | -0.4596 | 0.607 | 0.67 | 1 | HC_vs_MS.Trt_F |
| CCSER2   | 0.01005 | -0.3245 | 0.578 | 0.44 | 1 | HC_vs_MS.Trt_F |
| DHRS12   | 0.01009 | 0.75824 | 0.162 | 0.09 | 1 | HC_vs_MS.Trt_F |
| TMEM239  | 0.01012 | 0.34419 | 0.382 | 0.3  | 1 | HC_vs_MS.Trt_F |

|          |         |         |       |      |   |                |
|----------|---------|---------|-------|------|---|----------------|
| SNX27    | 0.01014 | -0.4646 | 0.803 | 0.68 | 1 | HC_vs_MS.Trt_F |
| PLGLB1   | 0.01019 | 0.75785 | 0.185 | 0.11 | 1 | HC_vs_MS.Trt_F |
| RBMS1    | 0.01022 | 0.32505 | 0.731 | 0.61 | 1 | HC_vs_MS.Trt_F |
| FSD1L    | 0.01022 | 0.8944  | 0.28  | 0.19 | 1 | HC_vs_MS.Trt_F |
| POLR3D   | 0.01024 | 1.38467 | 0.445 | 0.35 | 1 | HC_vs_MS.Trt_F |
| HIPK1    | 0.01024 | 0.85672 | 0.263 | 0.18 | 1 | HC_vs_MS.Trt_F |
| TECRL    | 0.01037 | 0.40882 | 0.286 | 0.2  | 1 | HC_vs_MS.Trt_F |
| CARD19   | 0.0104  | 0.73998 | 0.37  | 0.28 | 1 | HC_vs_MS.Trt_F |
| TBXA2R   | 0.01041 | 0.29534 | 0.746 | 0.67 | 1 | HC_vs_MS.Trt_F |
| CACNB3   | 0.01042 | 0.43822 | 0.633 | 0.51 | 1 | HC_vs_MS.Trt_F |
| TPCN1    | 0.01045 | 0.31478 | 0.428 | 0.34 | 1 | HC_vs_MS.Trt_F |
| RAB13    | 0.01049 | 0.28736 | 0.572 | 0.46 | 1 | HC_vs_MS.Trt_F |
| ERICH3   | 0.0105  | 1.51711 | 0.118 | 0.06 | 1 | HC_vs_MS.Trt_F |
| NT5C     | 0.01051 | 0.81042 | 0.205 | 0.13 | 1 | HC_vs_MS.Trt_F |
| TCERG1   | 0.01057 | 0.36834 | 0.341 | 0.25 | 1 | HC_vs_MS.Trt_F |
| KLC1     | 0.01057 | 0.42857 | 0.682 | 0.6  | 1 | HC_vs_MS.Trt_F |
| ELP2     | 0.01058 | 0.29785 | 0.688 | 0.57 | 1 | HC_vs_MS.Trt_F |
| GALNT2   | 0.01063 | -0.3434 | 0.286 | 0.19 | 1 | HC_vs_MS.Trt_F |
| CEP41    | 0.01068 | 0.34946 | 0.87  | 0.78 | 1 | HC_vs_MS.Trt_F |
| MAP7D1   | 0.01068 | 0.66336 | 0.59  | 0.46 | 1 | HC_vs_MS.Trt_F |
| MBD5     | 0.0107  | 0.69901 | 0.87  | 0.84 | 1 | HC_vs_MS.Trt_F |
| DOT1L    | 0.01074 | 0.77819 | 0.818 | 0.75 | 1 | HC_vs_MS.Trt_F |
| ZWILCH   | 0.01077 | -0.9158 | 0.694 | 0.59 | 1 | HC_vs_MS.Trt_F |
| TSC22D3  | 0.01081 | 0.31023 | 0.754 | 0.68 | 1 | HC_vs_MS.Trt_F |
| ULBP3    | 0.01081 | -0.4989 | 0.647 | 0.54 | 1 | HC_vs_MS.Trt_F |
| SMYD3    | 0.01088 | 0.35681 | 0.234 | 0.15 | 1 | HC_vs_MS.Trt_F |
| TTC5     | 0.01089 | 0.45512 | 0.624 | 0.51 | 1 | HC_vs_MS.Trt_F |
| C11orf24 | 0.01096 | 1.03574 | 0.275 | 0.19 | 1 | HC_vs_MS.Trt_F |
| MYO1G    | 0.01102 | 0.34744 | 0.653 | 0.58 | 1 | HC_vs_MS.Trt_F |
| CYCS     | 0.01107 | 0.45627 | 0.801 | 0.74 | 1 | HC_vs_MS.Trt_F |
| WDR74    | 0.01107 | 0.40976 | 0.653 | 0.53 | 1 | HC_vs_MS.Trt_F |
| C1orf123 | 0.01112 | 0.30853 | 0.22  | 0.14 | 1 | HC_vs_MS.Trt_F |
| RBM18    | 0.01125 | -0.5644 | 0.393 | 0.28 | 1 | HC_vs_MS.Trt_F |
| IGF2BP3  | 0.01126 | 0.34449 | 0.613 | 0.53 | 1 | HC_vs_MS.Trt_F |
| RGPD4    | 0.01132 | 0.62508 | 0.217 | 0.14 | 1 | HC_vs_MS.Trt_F |
| ZNF724   | 0.01133 | 0.47572 | 0.925 | 0.86 | 1 | HC_vs_MS.Trt_F |
| MET      | 0.01136 | -0.3999 | 0.332 | 0.4  | 1 | HC_vs_MS.Trt_F |
| DMPK     | 0.01139 | 0.61196 | 0.668 | 0.57 | 1 | HC_vs_MS.Trt_F |
| RNGTT    | 0.0114  | 0.63659 | 0.439 | 0.34 | 1 | HC_vs_MS.Trt_F |
| LYST     | 0.01144 | 0.62953 | 0.422 | 0.31 | 1 | HC_vs_MS.Trt_F |

|            |         |         |       |      |   |                |
|------------|---------|---------|-------|------|---|----------------|
| NCAPG2     | 0.01152 | -1.5356 | 0.202 | 0.27 | 1 | HC_vs_MS.Trt_F |
| UTP18      | 0.01152 | 0.64715 | 0.202 | 0.13 | 1 | HC_vs_MS.Trt_F |
| ELMO1      | 0.01155 | 0.38039 | 0.841 | 0.79 | 1 | HC_vs_MS.Trt_F |
| SEL1L      | 0.01156 | 0.48206 | 0.254 | 0.17 | 1 | HC_vs_MS.Trt_F |
| BMP1       | 0.01158 | 0.59483 | 0.639 | 0.54 | 1 | HC_vs_MS.Trt_F |
| TNKS2      | 0.01162 | 0.41012 | 0.347 | 0.26 | 1 | HC_vs_MS.Trt_F |
| CDC37      | 0.01162 | 0.36832 | 0.465 | 0.36 | 1 | HC_vs_MS.Trt_F |
| AKAP11     | 0.01169 | 0.55954 | 0.286 | 0.19 | 1 | HC_vs_MS.Trt_F |
| AC012314.1 | 0.01171 | -0.3221 | 0.676 | 0.69 | 1 | HC_vs_MS.Trt_F |
| AC012314.1 | 0.01171 | -0.3221 | 0.676 | 0.69 | 1 | HC_vs_MS.Trt_F |
| AC012314.1 | 0.01171 | -0.3221 | 0.676 | 0.69 | 1 | HC_vs_MS.Trt_F |
| AC012314.2 | 0.01171 | -0.3221 | 0.676 | 0.69 | 1 | HC_vs_MS.Trt_F |
| AC012314.4 | 0.01171 | -0.3221 | 0.676 | 0.69 | 1 | HC_vs_MS.Trt_F |
| AC012314.5 | 0.01171 | -0.3221 | 0.676 | 0.69 | 1 | HC_vs_MS.Trt_F |
| POLE4      | 0.01178 | 0.7483  | 0.188 | 0.11 | 1 | HC_vs_MS.Trt_F |
| R3HDM2     | 0.0118  | -0.5129 | 0.772 | 0.76 | 1 | HC_vs_MS.Trt_F |
| DNASE1L3   | 0.0118  | 0.38646 | 0.462 | 0.34 | 1 | HC_vs_MS.Trt_F |
| CRISPLD2   | 0.01186 | 0.39619 | 0.809 | 0.77 | 1 | HC_vs_MS.Trt_F |
| HNRNPU     | 0.01197 | -0.4927 | 0.506 | 0.57 | 1 | HC_vs_MS.Trt_F |
| TMPRSS13   | 0.01203 | -0.8996 | 0.243 | 0.16 | 1 | HC_vs_MS.Trt_F |
| ASAP1      | 0.01204 | 1.31313 | 0.257 | 0.18 | 1 | HC_vs_MS.Trt_F |
| MNAT1      | 0.01207 | 0.86474 | 0.156 | 0.09 | 1 | HC_vs_MS.Trt_F |
| LIG1       | 0.01216 | 0.70579 | 0.194 | 0.12 | 1 | HC_vs_MS.Trt_F |
| PAK3       | 0.01219 | 0.44804 | 0.543 | 0.42 | 1 | HC_vs_MS.Trt_F |
| FAM131A    | 0.01236 | -0.4738 | 0.882 | 0.8  | 1 | HC_vs_MS.Trt_F |
| NSUN4      | 0.01252 | 0.41502 | 0.806 | 0.73 | 1 | HC_vs_MS.Trt_F |
| RNPC3      | 0.01256 | 0.35153 | 0.405 | 0.3  | 1 | HC_vs_MS.Trt_F |
| ECE1       | 0.01257 | 0.33114 | 0.763 | 0.68 | 1 | HC_vs_MS.Trt_F |
| HCFC1      | 0.01258 | 0.44277 | 0.341 | 0.25 | 1 | HC_vs_MS.Trt_F |
| SULT2B1    | 0.01264 | 0.27496 | 0.569 | 0.46 | 1 | HC_vs_MS.Trt_F |
| LMF2       | 0.01265 | 0.5996  | 0.303 | 0.22 | 1 | HC_vs_MS.Trt_F |
| FADS6      | 0.01282 | 0.28071 | 0.639 | 0.53 | 1 | HC_vs_MS.Trt_F |
| PHC3       | 0.01289 | 0.31376 | 0.968 | 0.97 | 1 | HC_vs_MS.Trt_F |
| ARHGAP11B  | 0.01291 | 0.25832 | 0.289 | 0.2  | 1 | HC_vs_MS.Trt_F |
| BMP8B      | 0.01293 | 0.29052 | 0.514 | 0.4  | 1 | HC_vs_MS.Trt_F |
| EPG5       | 0.01301 | 0.56915 | 0.564 | 0.45 | 1 | HC_vs_MS.Trt_F |
| ZNF395     | 0.01303 | 0.61651 | 0.592 | 0.53 | 1 | HC_vs_MS.Trt_F |
| RPL35A     | 0.01307 | -0.357  | 0.829 | 0.84 | 1 | HC_vs_MS.Trt_F |
| FXR2       | 0.0131  | 0.47254 | 0.714 | 0.63 | 1 | HC_vs_MS.Trt_F |
| SLC25A34   | 0.01311 | -0.5611 | 0.668 | 0.55 | 1 | HC_vs_MS.Trt_F |

|            |         |         |       |      |   |                |
|------------|---------|---------|-------|------|---|----------------|
| RP3-461F17 | 0.01312 | 0.54795 | 0.283 | 0.19 | 1 | HC_vs_MS.Trt_F |
| TPH1       | 0.01319 | -0.6761 | 0.564 | 0.43 | 1 | HC_vs_MS.Trt_F |
| COL6A3     | 0.01322 | 1.64712 | 0.517 | 0.4  | 1 | HC_vs_MS.Trt_F |
| PIGH       | 0.01327 | -0.4207 | 0.688 | 0.56 | 1 | HC_vs_MS.Trt_F |
| SIAH1      | 0.01329 | 0.66562 | 0.275 | 0.19 | 1 | HC_vs_MS.Trt_F |
| OFD1       | 0.0133  | 0.26845 | 0.298 | 0.2  | 1 | HC_vs_MS.Trt_F |
| CCNYL1     | 0.01332 | -0.7228 | 0.48  | 0.35 | 1 | HC_vs_MS.Trt_F |
| FIS1       | 0.01336 | 0.35076 | 0.367 | 0.26 | 1 | HC_vs_MS.Trt_F |
| ZNF343     | 0.01339 | 1.11947 | 0.52  | 0.43 | 1 | HC_vs_MS.Trt_F |
| PIM1       | 0.01339 | 0.25626 | 0.457 | 0.34 | 1 | HC_vs_MS.Trt_F |
| DCAF17     | 0.0134  | 0.30895 | 0.483 | 0.38 | 1 | HC_vs_MS.Trt_F |
| KCNJ6      | 0.01345 | 0.53937 | 0.873 | 0.83 | 1 | HC_vs_MS.Trt_F |
| YIF1A      | 0.01347 | 0.51843 | 0.173 | 0.1  | 1 | HC_vs_MS.Trt_F |
| FAM45A     | 0.01351 | 0.31121 | 0.754 | 0.67 | 1 | HC_vs_MS.Trt_F |
| KCNJ5      | 0.01352 | 0.36872 | 0.673 | 0.57 | 1 | HC_vs_MS.Trt_F |
| CUL1       | 0.01365 | 0.98644 | 0.237 | 0.16 | 1 | HC_vs_MS.Trt_F |
| FCHO1      | 0.01369 | 0.73607 | 0.818 | 0.73 | 1 | HC_vs_MS.Trt_F |
| CYP2C19    | 0.01374 | 0.40836 | 0.769 | 0.7  | 1 | HC_vs_MS.Trt_F |
| NFKBIZ     | 0.01376 | 0.88589 | 0.445 | 0.36 | 1 | HC_vs_MS.Trt_F |
| RIPK1      | 0.01381 | 0.97254 | 0.237 | 0.16 | 1 | HC_vs_MS.Trt_F |
| LMTK2      | 0.01389 | 0.25881 | 0.303 | 0.22 | 1 | HC_vs_MS.Trt_F |
| DMD        | 0.01394 | 0.30438 | 0.728 | 0.63 | 1 | HC_vs_MS.Trt_F |
| SLBP       | 0.01397 | 0.2733  | 0.243 | 0.16 | 1 | HC_vs_MS.Trt_F |
| VPS25      | 0.01397 | 0.80787 | 0.338 | 0.25 | 1 | HC_vs_MS.Trt_F |
| ZC3H10     | 0.014   | 0.37529 | 0.613 | 0.51 | 1 | HC_vs_MS.Trt_F |
| USP38      | 0.01401 | 0.25753 | 0.384 | 0.29 | 1 | HC_vs_MS.Trt_F |
| PTPN3      | 0.01418 | 0.27175 | 0.835 | 0.74 | 1 | HC_vs_MS.Trt_F |
| KLF11      | 0.01419 | 1.06951 | 0.107 | 0.05 | 1 | HC_vs_MS.Trt_F |
| GBP2       | 0.01424 | 0.27705 | 0.46  | 0.36 | 1 | HC_vs_MS.Trt_F |
| CAPS       | 0.01432 | 0.2638  | 0.971 | 0.95 | 1 | HC_vs_MS.Trt_F |
| CRY1       | 0.01448 | 0.49777 | 0.208 | 0.13 | 1 | HC_vs_MS.Trt_F |
| DUSP16     | 0.01449 | -0.4702 | 0.329 | 0.23 | 1 | HC_vs_MS.Trt_F |
| UQCC1      | 0.01457 | 0.48134 | 0.595 | 0.5  | 1 | HC_vs_MS.Trt_F |
| DYNLT3     | 0.01459 | 0.67448 | 0.691 | 0.62 | 1 | HC_vs_MS.Trt_F |
| TP53I13    | 0.01462 | 0.65    | 0.179 | 0.11 | 1 | HC_vs_MS.Trt_F |
| ERAL1      | 0.01466 | 0.80326 | 0.153 | 0.09 | 1 | HC_vs_MS.Trt_F |
| CFHR1      | 0.01468 | 0.34882 | 0.786 | 0.71 | 1 | HC_vs_MS.Trt_F |
| PBX2       | 0.01475 | 0.82427 | 0.173 | 0.11 | 1 | HC_vs_MS.Trt_F |
| ARHGDI1    | 0.01476 | 1.09511 | 0.416 | 0.34 | 1 | HC_vs_MS.Trt_F |
| WTAP       | 0.01483 | -0.2821 | 0.621 | 0.65 | 1 | HC_vs_MS.Trt_F |

|            |         |         |       |      |   |                |
|------------|---------|---------|-------|------|---|----------------|
| GPAM       | 0.01483 | 0.61129 | 0.113 | 0.06 | 1 | HC_vs_MS.Trt_F |
| CPPED1     | 0.01488 | 0.54076 | 0.65  | 0.58 | 1 | HC_vs_MS.Trt_F |
| DST        | 0.01489 | 0.39267 | 0.757 | 0.67 | 1 | HC_vs_MS.Trt_F |
| CARMIL1    | 0.0149  | 0.54195 | 0.361 | 0.26 | 1 | HC_vs_MS.Trt_F |
| MAP4K1     | 0.01492 | 0.36523 | 0.91  | 0.88 | 1 | HC_vs_MS.Trt_F |
| KIAA0930   | 0.01507 | 1.05584 | 0.691 | 0.61 | 1 | HC_vs_MS.Trt_F |
| VPS37B     | 0.0151  | 1.17041 | 0.694 | 0.62 | 1 | HC_vs_MS.Trt_F |
| PROSER3    | 0.01513 | 0.68197 | 0.916 | 0.84 | 1 | HC_vs_MS.Trt_F |
| GPCPD1     | 0.01514 | 0.33864 | 0.445 | 0.36 | 1 | HC_vs_MS.Trt_F |
| LSR        | 0.01519 | 1.52591 | 0.237 | 0.17 | 1 | HC_vs_MS.Trt_F |
| LAT2       | 0.01525 | 0.70502 | 0.876 | 0.81 | 1 | HC_vs_MS.Trt_F |
| ERC1       | 0.0153  | 0.3081  | 0.931 | 0.89 | 1 | HC_vs_MS.Trt_F |
| RAN        | 0.01535 | 0.36104 | 0.468 | 0.37 | 1 | HC_vs_MS.Trt_F |
| RANBP3     | 0.01538 | 0.31264 | 0.838 | 0.76 | 1 | HC_vs_MS.Trt_F |
| SIRT5      | 0.01545 | 0.45472 | 0.879 | 0.79 | 1 | HC_vs_MS.Trt_F |
| TRAM2      | 0.01548 | 0.37755 | 0.309 | 0.22 | 1 | HC_vs_MS.Trt_F |
| TRIP11     | 0.01565 | 0.31229 | 0.613 | 0.51 | 1 | HC_vs_MS.Trt_F |
| KLRG1      | 0.0157  | 0.50403 | 0.465 | 0.37 | 1 | HC_vs_MS.Trt_F |
| DENND4C    | 0.01577 | 0.77506 | 0.442 | 0.34 | 1 | HC_vs_MS.Trt_F |
| CTSL       | 0.01579 | -1.1868 | 0.078 | 0.14 | 1 | HC_vs_MS.Trt_F |
| ANKRD36B   | 0.01586 | -0.2641 | 0.743 | 0.64 | 1 | HC_vs_MS.Trt_F |
| USP37      | 0.01591 | 0.53538 | 0.535 | 0.44 | 1 | HC_vs_MS.Trt_F |
| NUP210     | 0.01593 | 0.42031 | 0.578 | 0.5  | 1 | HC_vs_MS.Trt_F |
| TBC1D15    | 0.01601 | 0.79655 | 0.592 | 0.51 | 1 | HC_vs_MS.Trt_F |
| RABGAP1    | 0.01606 | 0.60266 | 0.468 | 0.36 | 1 | HC_vs_MS.Trt_F |
| ARPC4      | 0.01607 | -0.4879 | 0.645 | 0.68 | 1 | HC_vs_MS.Trt_F |
| GRSF1      | 0.01608 | -0.2528 | 0.76  | 0.68 | 1 | HC_vs_MS.Trt_F |
| ZNF106     | 0.01624 | 0.31351 | 0.905 | 0.85 | 1 | HC_vs_MS.Trt_F |
| ZNF592     | 0.0163  | 0.55131 | 0.246 | 0.16 | 1 | HC_vs_MS.Trt_F |
| EML6       | 0.01633 | 0.603   | 0.665 | 0.61 | 1 | HC_vs_MS.Trt_F |
| RABGGTB    | 0.01639 | 0.85655 | 0.373 | 0.28 | 1 | HC_vs_MS.Trt_F |
| KPNA2      | 0.0164  | 0.44733 | 0.168 | 0.1  | 1 | HC_vs_MS.Trt_F |
| RP11-176H8 | 0.01641 | 0.77488 | 0.887 | 0.83 | 1 | HC_vs_MS.Trt_F |
| MTMR6      | 0.01647 | 1.27962 | 0.171 | 0.1  | 1 | HC_vs_MS.Trt_F |
| WBP2       | 0.01648 | 0.37105 | 0.723 | 0.6  | 1 | HC_vs_MS.Trt_F |
| RAB2B      | 0.01654 | 0.26746 | 0.74  | 0.64 | 1 | HC_vs_MS.Trt_F |
| UGCG       | 0.01655 | 0.36938 | 0.286 | 0.2  | 1 | HC_vs_MS.Trt_F |
| MSL2       | 0.01656 | 0.381   | 0.22  | 0.14 | 1 | HC_vs_MS.Trt_F |
| TGIF1      | 0.01657 | 0.37577 | 0.315 | 0.23 | 1 | HC_vs_MS.Trt_F |
| ICOSLG     | 0.01663 | 0.6253  | 0.803 | 0.71 | 1 | HC_vs_MS.Trt_F |

|            |         |         |       |      |   |                |
|------------|---------|---------|-------|------|---|----------------|
| SMC6       | 0.01665 | 0.83676 | 0.54  | 0.44 | 1 | HC_vs_MS.Trt_F |
| RLIM       | 0.01666 | 0.70635 | 0.772 | 0.66 | 1 | HC_vs_MS.Trt_F |
| CTLA4      | 0.01673 | 0.37451 | 0.321 | 0.23 | 1 | HC_vs_MS.Trt_F |
| NAV1       | 0.01677 | 0.31694 | 0.908 | 0.87 | 1 | HC_vs_MS.Trt_F |
| WDFY2      | 0.01678 | 0.58202 | 0.645 | 0.55 | 1 | HC_vs_MS.Trt_F |
| UBE2B      | 0.01679 | -0.2752 | 0.757 | 0.68 | 1 | HC_vs_MS.Trt_F |
| CCR4       | 0.01682 | -0.5934 | 0.922 | 0.91 | 1 | HC_vs_MS.Trt_F |
| TMEM219    | 0.0169  | 0.38729 | 0.327 | 0.24 | 1 | HC_vs_MS.Trt_F |
| ABR        | 0.01694 | 0.46339 | 0.789 | 0.75 | 1 | HC_vs_MS.Trt_F |
| GIN53      | 0.01702 | 0.26922 | 0.89  | 0.84 | 1 | HC_vs_MS.Trt_F |
| PPP4R3B    | 0.0171  | 0.43515 | 0.497 | 0.4  | 1 | HC_vs_MS.Trt_F |
| GALNT15    | 0.01713 | -0.2727 | 0.37  | 0.28 | 1 | HC_vs_MS.Trt_F |
| ACSS1      | 0.01714 | 0.83491 | 0.627 | 0.57 | 1 | HC_vs_MS.Trt_F |
| RIC1       | 0.0172  | 0.48811 | 0.202 | 0.13 | 1 | HC_vs_MS.Trt_F |
| ZNF726     | 0.0172  | 0.48174 | 0.902 | 0.86 | 1 | HC_vs_MS.Trt_F |
| PHPT1      | 0.01723 | -0.4228 | 0.228 | 0.14 | 1 | HC_vs_MS.Trt_F |
| NOX5       | 0.01724 | 0.38539 | 0.592 | 0.51 | 1 | HC_vs_MS.Trt_F |
| C4BPB      | 0.01725 | 0.32899 | 0.85  | 0.81 | 1 | HC_vs_MS.Trt_F |
| ZNF345     | 0.01726 | 0.78287 | 0.85  | 0.8  | 1 | HC_vs_MS.Trt_F |
| OAS3       | 0.01733 | 0.65319 | 0.665 | 0.55 | 1 | HC_vs_MS.Trt_F |
| GINM1      | 0.01735 | 0.41825 | 0.598 | 0.54 | 1 | HC_vs_MS.Trt_F |
| FDFT1      | 0.01737 | 0.32183 | 0.364 | 0.28 | 1 | HC_vs_MS.Trt_F |
| UVSSA      | 0.01738 | 0.75261 | 0.824 | 0.74 | 1 | HC_vs_MS.Trt_F |
| ABCA2      | 0.01743 | 0.84527 | 0.341 | 0.25 | 1 | HC_vs_MS.Trt_F |
| MAPK14     | 0.01745 | 0.5858  | 0.205 | 0.13 | 1 | HC_vs_MS.Trt_F |
| ZNF778     | 0.01746 | 0.37347 | 0.705 | 0.64 | 1 | HC_vs_MS.Trt_F |
| SMNDC1     | 0.01747 | 0.89739 | 0.197 | 0.13 | 1 | HC_vs_MS.Trt_F |
| FASTKD5    | 0.0175  | -0.7266 | 0.159 | 0.09 | 1 | HC_vs_MS.Trt_F |
| MR1        | 0.01751 | 0.51111 | 0.936 | 0.9  | 1 | HC_vs_MS.Trt_F |
| NREP       | 0.01752 | 0.6366  | 0.205 | 0.14 | 1 | HC_vs_MS.Trt_F |
| ACAD10     | 0.01752 | -0.8256 | 0.506 | 0.38 | 1 | HC_vs_MS.Trt_F |
| CDKN1B     | 0.01752 | 0.46921 | 0.355 | 0.27 | 1 | HC_vs_MS.Trt_F |
| RP4-635E18 | 0.01754 | -1.3274 | 0.173 | 0.23 | 1 | HC_vs_MS.Trt_F |
| TAF1       | 0.01757 | -0.393  | 0.815 | 0.75 | 1 | HC_vs_MS.Trt_F |
| RPS4Y1     | 0.0176  | 2.41091 | 0.136 | 0.08 | 1 | HC_vs_MS.Trt_F |
| MCM6       | 0.01762 | 0.89773 | 0.173 | 0.11 | 1 | HC_vs_MS.Trt_F |
| SOCS3      | 0.01764 | 0.32559 | 0.214 | 0.14 | 1 | HC_vs_MS.Trt_F |
| HOXB2      | 0.0177  | 0.33304 | 0.182 | 0.11 | 1 | HC_vs_MS.Trt_F |
| GMDS       | 0.01774 | 0.43209 | 0.194 | 0.12 | 1 | HC_vs_MS.Trt_F |
| DENND5B    | 0.01777 | 0.50897 | 0.642 | 0.53 | 1 | HC_vs_MS.Trt_F |



|           |         |         |       |      |   |                |
|-----------|---------|---------|-------|------|---|----------------|
| TMED4     | 0.01781 | -0.6157 | 0.951 | 0.95 | 1 | HC_vs_MS.Trt_F |
| CYP2C9    | 0.01794 | 0.28813 | 0.581 | 0.49 | 1 | HC_vs_MS.Trt_F |
| ENAH      | 0.018   | 0.55282 | 0.723 | 0.62 | 1 | HC_vs_MS.Trt_F |
| CCR5      | 0.01804 | 0.99104 | 0.147 | 0.09 | 1 | HC_vs_MS.Trt_F |
| RAPGEF6   | 0.01806 | 0.5173  | 0.546 | 0.44 | 1 | HC_vs_MS.Trt_F |
| HAX1      | 0.0182  | 0.28787 | 0.269 | 0.18 | 1 | HC_vs_MS.Trt_F |
| TAF11     | 0.01826 | -0.2884 | 0.561 | 0.45 | 1 | HC_vs_MS.Trt_F |
| DHFR2     | 0.01826 | -0.4431 | 0.691 | 0.6  | 1 | HC_vs_MS.Trt_F |
| ADAM15    | 0.0183  | -0.3149 | 0.465 | 0.37 | 1 | HC_vs_MS.Trt_F |
| STK11     | 0.01831 | 0.60877 | 0.471 | 0.38 | 1 | HC_vs_MS.Trt_F |
| ATF2      | 0.01837 | 1.06959 | 0.251 | 0.18 | 1 | HC_vs_MS.Trt_F |
| BTG2      | 0.01838 | 0.2907  | 0.321 | 0.23 | 1 | HC_vs_MS.Trt_F |
| AKR1B1    | 0.0184  | -0.2952 | 0.803 | 0.69 | 1 | HC_vs_MS.Trt_F |
| USP33     | 0.01845 | -0.4959 | 0.965 | 0.87 | 1 | HC_vs_MS.Trt_F |
| MRPL16    | 0.01849 | 0.36517 | 0.211 | 0.14 | 1 | HC_vs_MS.Trt_F |
| ZNF879    | 0.01855 | 0.62946 | 0.367 | 0.27 | 1 | HC_vs_MS.Trt_F |
| SCN1A     | 0.0186  | 0.39121 | 0.451 | 0.34 | 1 | HC_vs_MS.Trt_F |
| NMNAT1    | 0.01863 | 0.33503 | 0.986 | 0.99 | 1 | HC_vs_MS.Trt_F |
| TGFB1     | 0.01867 | 0.79412 | 0.393 | 0.3  | 1 | HC_vs_MS.Trt_F |
| CS        | 0.0187  | 0.25062 | 0.864 | 0.78 | 1 | HC_vs_MS.Trt_F |
| PPCS      | 0.01875 | -0.3289 | 0.367 | 0.26 | 1 | HC_vs_MS.Trt_F |
| ZFYVE28   | 0.01886 | 0.92065 | 0.231 | 0.16 | 1 | HC_vs_MS.Trt_F |
| ENOSF1    | 0.0189  | 0.72851 | 0.879 | 0.81 | 1 | HC_vs_MS.Trt_F |
| UTRN      | 0.01893 | 0.29754 | 0.52  | 0.42 | 1 | HC_vs_MS.Trt_F |
| CIART     | 0.01902 | 0.54657 | 0.558 | 0.48 | 1 | HC_vs_MS.Trt_F |
| LRFN1     | 0.01907 | 0.38814 | 0.173 | 0.11 | 1 | HC_vs_MS.Trt_F |
| TNXB      | 0.01909 | 1.39763 | 0.168 | 0.1  | 1 | HC_vs_MS.Trt_F |
| SLC25A33  | 0.01912 | 0.54361 | 0.656 | 0.54 | 1 | HC_vs_MS.Trt_F |
| GABRE     | 0.01919 | 0.39888 | 0.199 | 0.13 | 1 | HC_vs_MS.Trt_F |
| KCNJ15    | 0.01924 | 0.42372 | 0.705 | 0.6  | 1 | HC_vs_MS.Trt_F |
| ZFAND3    | 0.01928 | 0.65588 | 0.734 | 0.63 | 1 | HC_vs_MS.Trt_F |
| NMT1      | 0.01932 | -0.3632 | 0.367 | 0.26 | 1 | HC_vs_MS.Trt_F |
| CNOT1     | 0.01932 | 0.58433 | 0.835 | 0.75 | 1 | HC_vs_MS.Trt_F |
| ZCCHC14   | 0.01933 | 1.83092 | 0.139 | 0.08 | 1 | HC_vs_MS.Trt_F |
| INSR      | 0.01942 | 0.478   | 0.517 | 0.44 | 1 | HC_vs_MS.Trt_F |
| TMEM98    | 0.01945 | 0.52402 | 0.61  | 0.51 | 1 | HC_vs_MS.Trt_F |
| IKBKAP    | 0.01948 | 0.46607 | 0.338 | 0.26 | 1 | HC_vs_MS.Trt_F |
| KIAA1324L | 0.01949 | 0.6534  | 0.104 | 0.05 | 1 | HC_vs_MS.Trt_F |
| CLEC16A   | 0.01952 | 0.40484 | 0.694 | 0.62 | 1 | HC_vs_MS.Trt_F |
| ZKSCAN3   | 0.01958 | -0.4922 | 0.896 | 0.84 | 1 | HC_vs_MS.Trt_F |

|          |         |         |       |      |   |                |
|----------|---------|---------|-------|------|---|----------------|
| FOXM1    | 0.01967 | 0.35834 | 0.809 | 0.72 | 1 | HC_vs_MS.Trt_F |
| CNTNAP3B | 0.01975 | 0.25345 | 0.893 | 0.84 | 1 | HC_vs_MS.Trt_F |
| PLIN2    | 0.01986 | 0.32437 | 0.697 | 0.6  | 1 | HC_vs_MS.Trt_F |
| ZBTB3    | 0.01994 | 0.40567 | 0.85  | 0.78 | 1 | HC_vs_MS.Trt_F |
| CCNT1    | 0.01995 | 0.41313 | 0.249 | 0.17 | 1 | HC_vs_MS.Trt_F |
| GALNT6   | 0.01996 | 0.72506 | 0.78  | 0.66 | 1 | HC_vs_MS.Trt_F |
| WDR91    | 0.01999 | -0.3398 | 0.535 | 0.43 | 1 | HC_vs_MS.Trt_F |
| CFAP36   | 0.01999 | 0.60004 | 0.486 | 0.39 | 1 | HC_vs_MS.Trt_F |
| NSUN3    | 0.02009 | -0.4237 | 0.89  | 0.81 | 1 | HC_vs_MS.Trt_F |
| FAM120B  | 0.02011 | 0.28192 | 0.364 | 0.27 | 1 | HC_vs_MS.Trt_F |
| ZNF385A  | 0.02018 | 0.26673 | 0.717 | 0.64 | 1 | HC_vs_MS.Trt_F |
| TBC1D32  | 0.0202  | 0.50696 | 0.564 | 0.46 | 1 | HC_vs_MS.Trt_F |
| FAS      | 0.02027 | 0.38992 | 0.442 | 0.34 | 1 | HC_vs_MS.Trt_F |
| MGAT5    | 0.02027 | 0.49941 | 0.214 | 0.14 | 1 | HC_vs_MS.Trt_F |
| MPP7     | 0.0203  | 1.63801 | 0.347 | 0.27 | 1 | HC_vs_MS.Trt_F |
| FRMD4B   | 0.02033 | 1.20942 | 0.934 | 0.96 | 1 | HC_vs_MS.Trt_F |
| PLAG1    | 0.02035 | -0.8252 | 0.46  | 0.37 | 1 | HC_vs_MS.Trt_F |
| MED6     | 0.02045 | 0.53381 | 0.601 | 0.5  | 1 | HC_vs_MS.Trt_F |
| TEX9     | 0.02048 | 0.25011 | 0.841 | 0.75 | 1 | HC_vs_MS.Trt_F |
| MFSD11   | 0.02056 | 0.42954 | 0.497 | 0.42 | 1 | HC_vs_MS.Trt_F |
| PMAIP1   | 0.02056 | 0.32783 | 0.263 | 0.18 | 1 | HC_vs_MS.Trt_F |
| AP4B1    | 0.02058 | -0.2652 | 0.682 | 0.6  | 1 | HC_vs_MS.Trt_F |
| HEPACAM  | 0.02063 | -0.261  | 0.376 | 0.3  | 1 | HC_vs_MS.Trt_F |
| EAF1     | 0.02063 | -0.4749 | 0.448 | 0.33 | 1 | HC_vs_MS.Trt_F |
| SYBU     | 0.02073 | 1.18898 | 0.113 | 0.06 | 1 | HC_vs_MS.Trt_F |
| PDE4A    | 0.02087 | 0.89638 | 0.176 | 0.12 | 1 | HC_vs_MS.Trt_F |
| SLC5A5   | 0.02095 | 0.577   | 0.517 | 0.43 | 1 | HC_vs_MS.Trt_F |
| TSSC4    | 0.02103 | -0.6432 | 0.127 | 0.19 | 1 | HC_vs_MS.Trt_F |
| POLR3GL  | 0.02114 | 0.42394 | 0.243 | 0.17 | 1 | HC_vs_MS.Trt_F |
| USP11    | 0.02116 | 0.7068  | 0.266 | 0.19 | 1 | HC_vs_MS.Trt_F |
| CDKN1A   | 0.02124 | 0.87596 | 0.182 | 0.12 | 1 | HC_vs_MS.Trt_F |
| COQ7     | 0.02126 | 0.32003 | 0.434 | 0.34 | 1 | HC_vs_MS.Trt_F |
| FAM19A2  | 0.0213  | 1.4632  | 0.289 | 0.21 | 1 | HC_vs_MS.Trt_F |
| NECAB3   | 0.0213  | -1.435  | 0.058 | 0.11 | 1 | HC_vs_MS.Trt_F |
| AMPD3    | 0.02135 | 0.49094 | 0.436 | 0.33 | 1 | HC_vs_MS.Trt_F |
| ZNF805   | 0.0214  | -0.3423 | 0.832 | 0.77 | 1 | HC_vs_MS.Trt_F |
| JAM2     | 0.02141 | 0.39439 | 0.607 | 0.53 | 1 | HC_vs_MS.Trt_F |
| ZC3H18   | 0.02143 | 0.38749 | 0.766 | 0.67 | 1 | HC_vs_MS.Trt_F |
| STEAP4   | 0.02143 | 0.26374 | 0.743 | 0.64 | 1 | HC_vs_MS.Trt_F |
| MACC1    | 0.0215  | 0.40686 | 0.786 | 0.72 | 1 | HC_vs_MS.Trt_F |

|          |         |         |       |      |   |                |
|----------|---------|---------|-------|------|---|----------------|
| MCCC2    | 0.02157 | 0.64962 | 0.734 | 0.65 | 1 | HC_vs_MS.Trt_F |
| GLB1L3   | 0.02164 | 0.45339 | 0.763 | 0.69 | 1 | HC_vs_MS.Trt_F |
| SCARB1   | 0.02167 | 0.80337 | 0.587 | 0.48 | 1 | HC_vs_MS.Trt_F |
| CDKAL1   | 0.02168 | 0.63621 | 0.63  | 0.53 | 1 | HC_vs_MS.Trt_F |
| UBQLN2   | 0.02169 | 0.36484 | 0.292 | 0.21 | 1 | HC_vs_MS.Trt_F |
| AFMID    | 0.02172 | 0.28349 | 0.957 | 0.91 | 1 | HC_vs_MS.Trt_F |
| ITPR2    | 0.02173 | 0.81714 | 0.283 | 0.21 | 1 | HC_vs_MS.Trt_F |
| SLC35E2  | 0.02178 | 0.4012  | 0.477 | 0.39 | 1 | HC_vs_MS.Trt_F |
| SNX19    | 0.0219  | 0.36876 | 0.269 | 0.19 | 1 | HC_vs_MS.Trt_F |
| MAPKAPK3 | 0.0219  | 0.67543 | 0.24  | 0.17 | 1 | HC_vs_MS.Trt_F |
| SBK1     | 0.02191 | 0.73338 | 0.246 | 0.17 | 1 | HC_vs_MS.Trt_F |
| KLHL20   | 0.02191 | 0.37539 | 0.197 | 0.13 | 1 | HC_vs_MS.Trt_F |
| WDR37    | 0.02196 | 0.55253 | 0.231 | 0.16 | 1 | HC_vs_MS.Trt_F |
| RNF152   | 0.02197 | 0.46976 | 0.509 | 0.4  | 1 | HC_vs_MS.Trt_F |
| DDX27    | 0.02203 | 0.25568 | 0.737 | 0.64 | 1 | HC_vs_MS.Trt_F |
| PHF3     | 0.02203 | 0.28484 | 0.494 | 0.4  | 1 | HC_vs_MS.Trt_F |
| WDTC1    | 0.02208 | 0.47411 | 0.399 | 0.29 | 1 | HC_vs_MS.Trt_F |
| GRHL2    | 0.02212 | 0.38545 | 0.28  | 0.2  | 1 | HC_vs_MS.Trt_F |
| HELQ     | 0.02222 | 0.86091 | 0.197 | 0.13 | 1 | HC_vs_MS.Trt_F |
| PRR12    | 0.02224 | 1.17083 | 0.133 | 0.08 | 1 | HC_vs_MS.Trt_F |
| MYO9B    | 0.02227 | 0.90364 | 0.275 | 0.2  | 1 | HC_vs_MS.Trt_F |
| SPATA5   | 0.02234 | 0.90012 | 0.798 | 0.7  | 1 | HC_vs_MS.Trt_F |
| TGFB111  | 0.02239 | 0.37621 | 0.332 | 0.25 | 1 | HC_vs_MS.Trt_F |
| ADCY4    | 0.02245 | 0.42026 | 0.15  | 0.09 | 1 | HC_vs_MS.Trt_F |
| PUS1     | 0.02247 | 0.41665 | 0.85  | 0.76 | 1 | HC_vs_MS.Trt_F |
| INO80D   | 0.02248 | 0.48154 | 0.483 | 0.39 | 1 | HC_vs_MS.Trt_F |
| SPOCK2   | 0.0225  | 0.33433 | 0.613 | 0.55 | 1 | HC_vs_MS.Trt_F |
| PDE5A    | 0.02255 | -0.2854 | 0.153 | 0.09 | 1 | HC_vs_MS.Trt_F |
| CALCOCO1 | 0.02271 | 0.25439 | 0.569 | 0.48 | 1 | HC_vs_MS.Trt_F |
| PRPF31   | 0.02272 | 0.33586 | 0.234 | 0.16 | 1 | HC_vs_MS.Trt_F |
| BBX      | 0.02279 | 0.32945 | 0.367 | 0.27 | 1 | HC_vs_MS.Trt_F |
| FBXO25   | 0.02288 | 0.90399 | 0.454 | 0.36 | 1 | HC_vs_MS.Trt_F |
| RANBP6   | 0.02288 | -1.1289 | 0.168 | 0.1  | 1 | HC_vs_MS.Trt_F |
| CHTOP    | 0.02317 | -0.4064 | 0.671 | 0.55 | 1 | HC_vs_MS.Trt_F |
| DPP6     | 0.02328 | -0.4898 | 0.601 | 0.51 | 1 | HC_vs_MS.Trt_F |
| ACADSB   | 0.02328 | -0.6338 | 0.717 | 0.61 | 1 | HC_vs_MS.Trt_F |
| RPL22L1  | 0.02329 | -0.2619 | 0.332 | 0.24 | 1 | HC_vs_MS.Trt_F |
| FCAR     | 0.02331 | 0.25289 | 0.882 | 0.84 | 1 | HC_vs_MS.Trt_F |
| EPHX2    | 0.02334 | 0.72298 | 0.353 | 0.27 | 1 | HC_vs_MS.Trt_F |
| CXorf40A | 0.02344 | 0.70345 | 0.188 | 0.12 | 1 | HC_vs_MS.Trt_F |

|          |         |         |       |      |   |                |
|----------|---------|---------|-------|------|---|----------------|
| ZNF318   | 0.02352 | 1.25118 | 0.711 | 0.61 | 1 | HC_vs_MS.Trt_F |
| DNAH9    | 0.02356 | -0.3955 | 0.5   | 0.57 | 1 | HC_vs_MS.Trt_F |
| NMD3     | 0.02361 | -0.2998 | 0.792 | 0.71 | 1 | HC_vs_MS.Trt_F |
| SAYS1    | 0.02367 | -0.4352 | 0.208 | 0.14 | 1 | HC_vs_MS.Trt_F |
| GATC     | 0.02374 | 0.76366 | 0.604 | 0.53 | 1 | HC_vs_MS.Trt_F |
| ACSF2    | 0.02379 | -0.2783 | 0.561 | 0.45 | 1 | HC_vs_MS.Trt_F |
| CASZ1    | 0.0238  | 1.00851 | 0.341 | 0.26 | 1 | HC_vs_MS.Trt_F |
| UHRF1BP1 | 0.02399 | 0.34761 | 0.616 | 0.52 | 1 | HC_vs_MS.Trt_F |
| FAM227A  | 0.02405 | 0.28771 | 0.942 | 0.87 | 1 | HC_vs_MS.Trt_F |
| C2CD2L   | 0.02409 | 0.37677 | 0.546 | 0.43 | 1 | HC_vs_MS.Trt_F |
| BCL2L1   | 0.02414 | 0.30671 | 0.318 | 0.23 | 1 | HC_vs_MS.Trt_F |
| ABCA9    | 0.02417 | 0.55294 | 0.882 | 0.82 | 1 | HC_vs_MS.Trt_F |
| RCBTB1   | 0.02419 | 0.80027 | 0.168 | 0.1  | 1 | HC_vs_MS.Trt_F |
| KCNAB2   | 0.02432 | 0.3286  | 0.477 | 0.38 | 1 | HC_vs_MS.Trt_F |
| TMEM209  | 0.02435 | -0.3918 | 0.818 | 0.75 | 1 | HC_vs_MS.Trt_F |
| NBPF19   | 0.0245  | 0.71723 | 0.474 | 0.38 | 1 | HC_vs_MS.Trt_F |
| IKZF3    | 0.02459 | 0.27837 | 0.977 | 0.95 | 1 | HC_vs_MS.Trt_F |
| TBRG4    | 0.02464 | -0.4538 | 0.436 | 0.32 | 1 | HC_vs_MS.Trt_F |
| KCTD19   | 0.0248  | 0.26921 | 0.783 | 0.72 | 1 | HC_vs_MS.Trt_F |
| DIS3L2   | 0.0248  | 0.32485 | 0.569 | 0.49 | 1 | HC_vs_MS.Trt_F |
| KIF23    | 0.02495 | 0.2742  | 0.618 | 0.54 | 1 | HC_vs_MS.Trt_F |
| SASH1    | 0.02495 | 0.26235 | 0.399 | 0.31 | 1 | HC_vs_MS.Trt_F |
| NOS3     | 0.02511 | 0.3149  | 0.445 | 0.34 | 1 | HC_vs_MS.Trt_F |
| WAS      | 0.0252  | 1.2611  | 0.332 | 0.26 | 1 | HC_vs_MS.Trt_F |
| TXNL4A   | 0.02522 | 0.52275 | 0.572 | 0.48 | 1 | HC_vs_MS.Trt_F |
| IFT81    | 0.02531 | 0.36316 | 0.792 | 0.67 | 1 | HC_vs_MS.Trt_F |
| CASP8AP2 | 0.02532 | 0.44846 | 0.379 | 0.29 | 1 | HC_vs_MS.Trt_F |
| TMEM52B  | 0.02532 | 0.25438 | 0.801 | 0.72 | 1 | HC_vs_MS.Trt_F |
| UBE2A    | 0.02546 | -0.301  | 0.416 | 0.32 | 1 | HC_vs_MS.Trt_F |
| DDX1     | 0.0255  | 0.28072 | 0.205 | 0.13 | 1 | HC_vs_MS.Trt_F |
| EXOC6B   | 0.02554 | 0.82114 | 0.182 | 0.12 | 1 | HC_vs_MS.Trt_F |
| RPUSD3   | 0.02567 | 0.36316 | 0.867 | 0.77 | 1 | HC_vs_MS.Trt_F |
| RHBDF2   | 0.02568 | -0.2949 | 0.939 | 0.91 | 1 | HC_vs_MS.Trt_F |
| TMEM41A  | 0.02568 | 0.42998 | 0.858 | 0.8  | 1 | HC_vs_MS.Trt_F |
| CADM1    | 0.02576 | -0.7904 | 0.289 | 0.35 | 1 | HC_vs_MS.Trt_F |
| RGS2     | 0.02581 | 0.5901  | 0.202 | 0.14 | 1 | HC_vs_MS.Trt_F |
| ITGA5    | 0.02588 | -0.6187 | 0.168 | 0.1  | 1 | HC_vs_MS.Trt_F |
| FAM168A  | 0.02595 | 0.33604 | 0.185 | 0.12 | 1 | HC_vs_MS.Trt_F |
| ADAM28   | 0.02601 | -0.7458 | 0.211 | 0.14 | 1 | HC_vs_MS.Trt_F |
| BCAR3    | 0.02602 | 0.63855 | 0.676 | 0.59 | 1 | HC_vs_MS.Trt_F |

|          |         |         |       |      |   |                |
|----------|---------|---------|-------|------|---|----------------|
| UCKL1    | 0.02604 | 0.93016 | 0.188 | 0.12 | 1 | HC_vs_MS.Trt_F |
| EXOSC5   | 0.02614 | 0.32326 | 0.142 | 0.08 | 1 | HC_vs_MS.Trt_F |
| FAM65A   | 0.02621 | 0.68303 | 0.197 | 0.13 | 1 | HC_vs_MS.Trt_F |
| POGK     | 0.02625 | 0.50899 | 0.312 | 0.23 | 1 | HC_vs_MS.Trt_F |
| BIN3     | 0.02626 | -0.3453 | 0.457 | 0.35 | 1 | HC_vs_MS.Trt_F |
| MAPK8IP3 | 0.02634 | 0.55468 | 0.22  | 0.15 | 1 | HC_vs_MS.Trt_F |
| CENPF    | 0.02645 | 0.72746 | 0.431 | 0.32 | 1 | HC_vs_MS.Trt_F |
| FAXC     | 0.02647 | 0.28732 | 0.396 | 0.31 | 1 | HC_vs_MS.Trt_F |
| ZNF555   | 0.0265  | -0.3371 | 0.711 | 0.6  | 1 | HC_vs_MS.Trt_F |
| GTF3C1   | 0.02653 | 0.37018 | 0.182 | 0.12 | 1 | HC_vs_MS.Trt_F |
| UQCRH    | 0.02659 | 0.31719 | 0.581 | 0.49 | 1 | HC_vs_MS.Trt_F |
| RBM38    | 0.02672 | 0.41269 | 0.202 | 0.13 | 1 | HC_vs_MS.Trt_F |
| HNRNPAB  | 0.02674 | 0.41348 | 0.223 | 0.15 | 1 | HC_vs_MS.Trt_F |
| EVI5     | 0.02681 | 0.25021 | 0.864 | 0.79 | 1 | HC_vs_MS.Trt_F |
| DHX15    | 0.02693 | 0.41817 | 0.54  | 0.46 | 1 | HC_vs_MS.Trt_F |
| TM9SF3   | 0.02705 | -1.1866 | 0.139 | 0.2  | 1 | HC_vs_MS.Trt_F |
| TCEAL1   | 0.02705 | 0.64831 | 0.121 | 0.07 | 1 | HC_vs_MS.Trt_F |
| DDHD1    | 0.02707 | 0.30574 | 0.942 | 0.86 | 1 | HC_vs_MS.Trt_F |
| SCML4    | 0.02707 | 0.35469 | 0.662 | 0.57 | 1 | HC_vs_MS.Trt_F |
| ERLIN1   | 0.02711 | 1.4687  | 0.101 | 0.05 | 1 | HC_vs_MS.Trt_F |
| NABP1    | 0.02711 | -0.5662 | 0.766 | 0.8  | 1 | HC_vs_MS.Trt_F |
| HLA-DRB1 | 0.02723 | 0.2676  | 0.321 | 0.23 | 1 | HC_vs_MS.Trt_F |
| RBM48    | 0.02728 | -0.818  | 0.829 | 0.72 | 1 | HC_vs_MS.Trt_F |
| ZFP36L1  | 0.02734 | -0.3845 | 0.769 | 0.76 | 1 | HC_vs_MS.Trt_F |
| THOC7    | 0.02744 | -1.0507 | 0.159 | 0.22 | 1 | HC_vs_MS.Trt_F |
| ATG4B    | 0.02745 | 0.4525  | 0.26  | 0.18 | 1 | HC_vs_MS.Trt_F |
| PITRM1   | 0.02753 | 0.33833 | 0.211 | 0.14 | 1 | HC_vs_MS.Trt_F |
| TTI2     | 0.02768 | 0.27405 | 0.512 | 0.4  | 1 | HC_vs_MS.Trt_F |
| PGAP1    | 0.0277  | 0.62215 | 0.457 | 0.37 | 1 | HC_vs_MS.Trt_F |
| NEK1     | 0.02775 | 0.70861 | 0.402 | 0.31 | 1 | HC_vs_MS.Trt_F |
| ACTN4    | 0.02777 | 0.26282 | 0.5   | 0.41 | 1 | HC_vs_MS.Trt_F |
| PPM1L    | 0.02786 | -0.286  | 0.246 | 0.31 | 1 | HC_vs_MS.Trt_F |
| UBTF     | 0.02789 | 0.57579 | 0.321 | 0.24 | 1 | HC_vs_MS.Trt_F |
| HEATR1   | 0.02792 | -1.0276 | 0.202 | 0.14 | 1 | HC_vs_MS.Trt_F |
| PBLD     | 0.02794 | 0.34423 | 0.673 | 0.57 | 1 | HC_vs_MS.Trt_F |
| FOXJ2    | 0.02794 | 0.29964 | 0.503 | 0.39 | 1 | HC_vs_MS.Trt_F |
| CISD2    | 0.02802 | -0.4655 | 0.523 | 0.45 | 1 | HC_vs_MS.Trt_F |
| BBS5     | 0.02814 | 0.26716 | 0.361 | 0.28 | 1 | HC_vs_MS.Trt_F |
| TUBGCP5  | 0.02818 | 0.38604 | 0.697 | 0.64 | 1 | HC_vs_MS.Trt_F |
| BCAM     | 0.02819 | 0.56906 | 0.786 | 0.7  | 1 | HC_vs_MS.Trt_F |

|          |         |         |       |      |   |                |
|----------|---------|---------|-------|------|---|----------------|
| SMAD9    | 0.02834 | -0.6113 | 0.448 | 0.33 | 1 | HC_vs_MS.Trt_F |
| LIN52    | 0.02847 | -0.3698 | 0.777 | 0.68 | 1 | HC_vs_MS.Trt_F |
| FUT8     | 0.0285  | 0.47162 | 1     | 0.99 | 1 | HC_vs_MS.Trt_F |
| WHRN     | 0.0285  | 0.78695 | 0.171 | 0.11 | 1 | HC_vs_MS.Trt_F |
| STYX     | 0.02852 | -0.2813 | 0.624 | 0.5  | 1 | HC_vs_MS.Trt_F |
| MTG2     | 0.02859 | -0.6088 | 0.847 | 0.82 | 1 | HC_vs_MS.Trt_F |
| TRNAU1AP | 0.02864 | 0.55526 | 0.919 | 0.88 | 1 | HC_vs_MS.Trt_F |
| NUP93    | 0.02864 | -0.3905 | 0.737 | 0.66 | 1 | HC_vs_MS.Trt_F |
| SH3BP1   | 0.02873 | 0.56102 | 0.156 | 0.1  | 1 | HC_vs_MS.Trt_F |
| BOD1L1   | 0.02881 | 0.25723 | 0.757 | 0.7  | 1 | HC_vs_MS.Trt_F |
| TRABD    | 0.02881 | 0.43738 | 0.382 | 0.31 | 1 | HC_vs_MS.Trt_F |
| DPH6     | 0.02914 | 0.25923 | 0.477 | 0.36 | 1 | HC_vs_MS.Trt_F |
| SLC10A3  | 0.02921 | -0.5032 | 0.159 | 0.1  | 1 | HC_vs_MS.Trt_F |
| CHD4     | 0.02922 | -0.3028 | 0.636 | 0.54 | 1 | HC_vs_MS.Trt_F |
| RAB17    | 0.02926 | 0.38617 | 0.246 | 0.18 | 1 | HC_vs_MS.Trt_F |
| DPYSL2   | 0.0293  | -0.7648 | 0.52  | 0.57 | 1 | HC_vs_MS.Trt_F |
| PLS3     | 0.02939 | -0.2664 | 0.46  | 0.35 | 1 | HC_vs_MS.Trt_F |
| PFDN1    | 0.02943 | 0.3541  | 0.237 | 0.16 | 1 | HC_vs_MS.Trt_F |
| ZDHC15   | 0.02946 | 0.34819 | 0.647 | 0.55 | 1 | HC_vs_MS.Trt_F |
| KIF20B   | 0.02948 | -0.4282 | 0.188 | 0.12 | 1 | HC_vs_MS.Trt_F |
| ATF6     | 0.02959 | 0.87866 | 0.283 | 0.2  | 1 | HC_vs_MS.Trt_F |
| PCYT1B   | 0.0296  | 0.28213 | 0.526 | 0.44 | 1 | HC_vs_MS.Trt_F |
| ARFGAP1  | 0.0296  | -0.58   | 0.234 | 0.15 | 1 | HC_vs_MS.Trt_F |
| ADCK1    | 0.02972 | 1.14577 | 0.312 | 0.23 | 1 | HC_vs_MS.Trt_F |
| ELF4     | 0.02976 | 0.41251 | 0.153 | 0.09 | 1 | HC_vs_MS.Trt_F |
| CLDN11   | 0.02983 | -0.3551 | 0.699 | 0.57 | 1 | HC_vs_MS.Trt_F |
| CDK19    | 0.02988 | 0.50647 | 0.358 | 0.27 | 1 | HC_vs_MS.Trt_F |
| SF3A3    | 0.02993 | -0.4191 | 0.408 | 0.31 | 1 | HC_vs_MS.Trt_F |
| TAF15    | 0.02994 | 0.36413 | 0.254 | 0.18 | 1 | HC_vs_MS.Trt_F |
| C22orf29 | 0.02999 | -0.354  | 0.494 | 0.39 | 1 | HC_vs_MS.Trt_F |
| C12orf10 | 0.03002 | 0.57561 | 0.286 | 0.2  | 1 | HC_vs_MS.Trt_F |
| TCAF2    | 0.03006 | -0.3316 | 0.78  | 0.68 | 1 | HC_vs_MS.Trt_F |
| IFI35    | 0.03007 | 0.33863 | 0.873 | 0.8  | 1 | HC_vs_MS.Trt_F |
| RBMS2    | 0.03008 | 0.2586  | 0.939 | 0.87 | 1 | HC_vs_MS.Trt_F |
| BTBD9    | 0.03009 | 0.59668 | 0.621 | 0.57 | 1 | HC_vs_MS.Trt_F |
| WRNIP1   | 0.03009 | 0.59591 | 0.133 | 0.08 | 1 | HC_vs_MS.Trt_F |
| CCDC169  | 0.03024 | 0.47032 | 0.636 | 0.52 | 1 | HC_vs_MS.Trt_F |
| SMG7     | 0.03025 | 0.39542 | 0.24  | 0.16 | 1 | HC_vs_MS.Trt_F |
| MCM4     | 0.03026 | 0.29005 | 0.673 | 0.6  | 1 | HC_vs_MS.Trt_F |
| CWC22    | 0.03037 | 0.26726 | 0.179 | 0.12 | 1 | HC_vs_MS.Trt_F |

|            |         |         |       |      |   |                |
|------------|---------|---------|-------|------|---|----------------|
| BCL3       | 0.03049 | 0.59406 | 0.147 | 0.09 | 1 | HC_vs_MS.Trt_F |
| RPS2       | 0.03059 | 0.37889 | 0.598 | 0.51 | 1 | HC_vs_MS.Trt_F |
| MRPL44     | 0.03064 | 0.46751 | 0.627 | 0.53 | 1 | HC_vs_MS.Trt_F |
| ZBTB4      | 0.03065 | 0.62919 | 0.194 | 0.13 | 1 | HC_vs_MS.Trt_F |
| CREBBP     | 0.03073 | 0.65421 | 0.59  | 0.49 | 1 | HC_vs_MS.Trt_F |
| KDM2A      | 0.03077 | 0.28549 | 0.919 | 0.92 | 1 | HC_vs_MS.Trt_F |
| ARL11      | 0.03085 | 0.32185 | 0.685 | 0.58 | 1 | HC_vs_MS.Trt_F |
| U2AF2      | 0.03085 | 1.10863 | 0.243 | 0.17 | 1 | HC_vs_MS.Trt_F |
| ARFGEF2    | 0.03086 | 0.78666 | 0.494 | 0.41 | 1 | HC_vs_MS.Trt_F |
| RASSF8     | 0.03094 | 0.32456 | 0.514 | 0.41 | 1 | HC_vs_MS.Trt_F |
| PCNX4      | 0.03107 | 0.25081 | 0.922 | 0.92 | 1 | HC_vs_MS.Trt_F |
| SPG21      | 0.03112 | 0.34733 | 0.913 | 0.88 | 1 | HC_vs_MS.Trt_F |
| SLC46A3    | 0.03113 | 0.25914 | 0.136 | 0.08 | 1 | HC_vs_MS.Trt_F |
| FDX1       | 0.0312  | -0.3023 | 0.384 | 0.28 | 1 | HC_vs_MS.Trt_F |
| JMY        | 0.03142 | 0.96087 | 0.353 | 0.28 | 1 | HC_vs_MS.Trt_F |
| CHGB       | 0.03142 | 1.03126 | 0.5   | 0.4  | 1 | HC_vs_MS.Trt_F |
| ERVK3-1    | 0.03144 | 0.57873 | 0.379 | 0.3  | 1 | HC_vs_MS.Trt_F |
| PLEKHM1    | 0.0316  | 0.3006  | 0.861 | 0.8  | 1 | HC_vs_MS.Trt_F |
| ATAD2B     | 0.03161 | 0.8244  | 0.746 | 0.74 | 1 | HC_vs_MS.Trt_F |
| ATP1B3     | 0.03161 | 0.36612 | 0.211 | 0.14 | 1 | HC_vs_MS.Trt_F |
| PIGN       | 0.03165 | 0.35489 | 0.653 | 0.58 | 1 | HC_vs_MS.Trt_F |
| MTHFD2L    | 0.03168 | 0.71679 | 0.535 | 0.47 | 1 | HC_vs_MS.Trt_F |
| STK3       | 0.03169 | 0.40404 | 0.786 | 0.73 | 1 | HC_vs_MS.Trt_F |
| ZNF462     | 0.03173 | 0.73806 | 0.24  | 0.18 | 1 | HC_vs_MS.Trt_F |
| ZC3H12B    | 0.03177 | -1.0783 | 0.63  | 0.5  | 1 | HC_vs_MS.Trt_F |
| HAUS6      | 0.03187 | 0.63774 | 0.39  | 0.31 | 1 | HC_vs_MS.Trt_F |
| HSF1       | 0.03188 | 0.47718 | 0.526 | 0.42 | 1 | HC_vs_MS.Trt_F |
| RP11-437B1 | 0.03195 | 0.27964 | 0.639 | 0.54 | 1 | HC_vs_MS.Trt_F |
| SF3B4      | 0.03199 | 0.43793 | 0.243 | 0.17 | 1 | HC_vs_MS.Trt_F |
| C1orf216   | 0.0321  | -0.2894 | 0.789 | 0.73 | 1 | HC_vs_MS.Trt_F |
| SYNRG      | 0.03211 | 0.7254  | 0.971 | 0.93 | 1 | HC_vs_MS.Trt_F |
| KIAA1147   | 0.03214 | 0.68658 | 0.124 | 0.07 | 1 | HC_vs_MS.Trt_F |
| EIF1AX     | 0.03224 | -0.4081 | 0.347 | 0.25 | 1 | HC_vs_MS.Trt_F |
| GOLGA8R    | 0.03226 | 0.4949  | 0.558 | 0.48 | 1 | HC_vs_MS.Trt_F |
| TMEM39A    | 0.03234 | 0.63902 | 0.211 | 0.14 | 1 | HC_vs_MS.Trt_F |
| TUBA1C     | 0.03234 | 0.32819 | 0.679 | 0.58 | 1 | HC_vs_MS.Trt_F |
| CCNG1      | 0.03247 | -0.9085 | 0.211 | 0.27 | 1 | HC_vs_MS.Trt_F |
| TMEM50B    | 0.03251 | 0.31073 | 0.734 | 0.67 | 1 | HC_vs_MS.Trt_F |
| ZNF91      | 0.03262 | 0.38958 | 0.806 | 0.73 | 1 | HC_vs_MS.Trt_F |
| KHNYN      | 0.03263 | 2.01588 | 0.136 | 0.08 | 1 | HC_vs_MS.Trt_F |

|          |         |         |       |      |   |                |
|----------|---------|---------|-------|------|---|----------------|
| GNAI2    | 0.03264 | 0.69981 | 0.451 | 0.37 | 1 | HC_vs_MS.Trt_F |
| EIF1AD   | 0.03266 | -0.8189 | 0.694 | 0.73 | 1 | HC_vs_MS.Trt_F |
| NAPEPLD  | 0.03266 | 0.59504 | 0.384 | 0.31 | 1 | HC_vs_MS.Trt_F |
| PKD1     | 0.03267 | 0.65282 | 0.454 | 0.35 | 1 | HC_vs_MS.Trt_F |
| BCL9L    | 0.03268 | 1.22318 | 0.205 | 0.14 | 1 | HC_vs_MS.Trt_F |
| ZNF714   | 0.03268 | 0.45907 | 0.96  | 0.91 | 1 | HC_vs_MS.Trt_F |
| SLC9A9   | 0.03274 | 0.86408 | 0.171 | 0.11 | 1 | HC_vs_MS.Trt_F |
| IREB2    | 0.03274 | 0.37465 | 0.844 | 0.75 | 1 | HC_vs_MS.Trt_F |
| ZMYM3    | 0.03274 | 0.2864  | 0.408 | 0.34 | 1 | HC_vs_MS.Trt_F |
| PRKG2    | 0.03292 | 0.47849 | 0.387 | 0.3  | 1 | HC_vs_MS.Trt_F |
| IGSF9    | 0.03296 | 0.31354 | 0.344 | 0.26 | 1 | HC_vs_MS.Trt_F |
| SVIP     | 0.03311 | 0.623   | 0.546 | 0.45 | 1 | HC_vs_MS.Trt_F |
| NCOA7    | 0.03334 | 0.5802  | 0.801 | 0.72 | 1 | HC_vs_MS.Trt_F |
| AZI2     | 0.03335 | 0.36001 | 0.197 | 0.13 | 1 | HC_vs_MS.Trt_F |
| MRPS35   | 0.03343 | 0.63396 | 0.173 | 0.11 | 1 | HC_vs_MS.Trt_F |
| P2RY11   | 0.03355 | -0.6866 | 0.092 | 0.15 | 1 | HC_vs_MS.Trt_F |
| DNAH12   | 0.03358 | -0.6954 | 0.107 | 0.16 | 1 | HC_vs_MS.Trt_F |
| RNF114   | 0.03362 | 0.33577 | 0.772 | 0.67 | 1 | HC_vs_MS.Trt_F |
| NOTCH4   | 0.03373 | 0.37058 | 0.85  | 0.78 | 1 | HC_vs_MS.Trt_F |
| OGG1     | 0.03378 | -0.38   | 0.431 | 0.34 | 1 | HC_vs_MS.Trt_F |
| RALGAPA2 | 0.0338  | 0.66262 | 0.205 | 0.14 | 1 | HC_vs_MS.Trt_F |
| TIAM2    | 0.03383 | 0.30327 | 0.815 | 0.75 | 1 | HC_vs_MS.Trt_F |
| OXSRI    | 0.03385 | -0.5393 | 0.124 | 0.18 | 1 | HC_vs_MS.Trt_F |
| CENPI    | 0.03387 | 0.88179 | 0.471 | 0.39 | 1 | HC_vs_MS.Trt_F |
| OAS1     | 0.03397 | 0.27933 | 0.584 | 0.51 | 1 | HC_vs_MS.Trt_F |
| KAT8     | 0.03406 | 0.71112 | 0.165 | 0.1  | 1 | HC_vs_MS.Trt_F |
| SEMA4C   | 0.03407 | 0.59476 | 0.801 | 0.73 | 1 | HC_vs_MS.Trt_F |
| FUT6     | 0.03421 | 0.36839 | 0.506 | 0.41 | 1 | HC_vs_MS.Trt_F |
| RBM43    | 0.03442 | 0.25153 | 0.682 | 0.6  | 1 | HC_vs_MS.Trt_F |
| PNRC1    | 0.03453 | 0.31171 | 0.35  | 0.27 | 1 | HC_vs_MS.Trt_F |
| FGFR1OP2 | 0.03454 | 0.30955 | 0.376 | 0.29 | 1 | HC_vs_MS.Trt_F |
| PDZD7    | 0.03482 | 0.42331 | 0.497 | 0.41 | 1 | HC_vs_MS.Trt_F |
| NT5C3B   | 0.03486 | 0.71611 | 0.659 | 0.61 | 1 | HC_vs_MS.Trt_F |
| CYB561   | 0.0349  | 0.99713 | 0.39  | 0.31 | 1 | HC_vs_MS.Trt_F |
| SLX4     | 0.0349  | 0.43345 | 0.569 | 0.5  | 1 | HC_vs_MS.Trt_F |
| DNAJC1   | 0.03507 | 0.57224 | 0.199 | 0.14 | 1 | HC_vs_MS.Trt_F |
| MCC      | 0.03509 | 0.96079 | 0.532 | 0.43 | 1 | HC_vs_MS.Trt_F |
| ZKSCAN8  | 0.03513 | 1.24495 | 0.303 | 0.24 | 1 | HC_vs_MS.Trt_F |
| LAX1     | 0.03515 | 0.36351 | 0.587 | 0.5  | 1 | HC_vs_MS.Trt_F |
| UNC79    | 0.03518 | 0.25302 | 0.408 | 0.32 | 1 | HC_vs_MS.Trt_F |



|          |         |         |       |      |   |                |
|----------|---------|---------|-------|------|---|----------------|
| ACOXL    | 0.03539 | 0.38221 | 0.72  | 0.66 | 1 | HC_vs_MS.Trt_F |
| NDRG1    | 0.03542 | 0.55649 | 0.191 | 0.13 | 1 | HC_vs_MS.Trt_F |
| DPP8     | 0.03545 | 0.39712 | 0.442 | 0.36 | 1 | HC_vs_MS.Trt_F |
| SLC35D1  | 0.03562 | 0.5483  | 0.35  | 0.26 | 1 | HC_vs_MS.Trt_F |
| ADAT2    | 0.03587 | -0.6966 | 0.486 | 0.38 | 1 | HC_vs_MS.Trt_F |
| PTPN9    | 0.0359  | 0.38384 | 0.355 | 0.27 | 1 | HC_vs_MS.Trt_F |
| RPS6KA1  | 0.03593 | 0.55681 | 0.237 | 0.17 | 1 | HC_vs_MS.Trt_F |
| ZNF277   | 0.03598 | -0.8557 | 0.616 | 0.5  | 1 | HC_vs_MS.Trt_F |
| FAM102B  | 0.036   | 0.76273 | 0.315 | 0.22 | 1 | HC_vs_MS.Trt_F |
| CC2D2B   | 0.036   | -0.6259 | 0.185 | 0.12 | 1 | HC_vs_MS.Trt_F |
| ZMYND8   | 0.03609 | 0.3037  | 0.419 | 0.33 | 1 | HC_vs_MS.Trt_F |
| MAF1     | 0.03616 | 0.36947 | 0.225 | 0.16 | 1 | HC_vs_MS.Trt_F |
| ICA1L    | 0.0363  | 0.61535 | 0.812 | 0.77 | 1 | HC_vs_MS.Trt_F |
| CDH12    | 0.03636 | 0.31829 | 0.803 | 0.75 | 1 | HC_vs_MS.Trt_F |
| HPS4     | 0.03638 | 0.5165  | 0.818 | 0.74 | 1 | HC_vs_MS.Trt_F |
| UTP6     | 0.03645 | -0.5381 | 0.899 | 0.87 | 1 | HC_vs_MS.Trt_F |
| NUDT6    | 0.03647 | 0.83006 | 0.584 | 0.51 | 1 | HC_vs_MS.Trt_F |
| SLC1A5   | 0.03648 | 0.32549 | 0.251 | 0.18 | 1 | HC_vs_MS.Trt_F |
| SUZ12    | 0.03654 | 0.42373 | 0.717 | 0.62 | 1 | HC_vs_MS.Trt_F |
| KRT8     | 0.03664 | 0.25425 | 0.867 | 0.81 | 1 | HC_vs_MS.Trt_F |
| RIN3     | 0.0367  | 0.34857 | 0.249 | 0.18 | 1 | HC_vs_MS.Trt_F |
| DNHD1    | 0.03683 | 0.26399 | 0.39  | 0.3  | 1 | HC_vs_MS.Trt_F |
| MAP4     | 0.03683 | 0.38743 | 0.815 | 0.76 | 1 | HC_vs_MS.Trt_F |
| PLOD3    | 0.03686 | 1.14246 | 0.78  | 0.67 | 1 | HC_vs_MS.Trt_F |
| NFKBID   | 0.03691 | -0.4567 | 0.642 | 0.53 | 1 | HC_vs_MS.Trt_F |
| SMAP2    | 0.03703 | -0.2523 | 0.37  | 0.28 | 1 | HC_vs_MS.Trt_F |
| BLOC1S2  | 0.03705 | -0.5017 | 0.598 | 0.5  | 1 | HC_vs_MS.Trt_F |
| SLC24A1  | 0.03725 | -0.9085 | 0.529 | 0.41 | 1 | HC_vs_MS.Trt_F |
| VPS4A    | 0.03745 | 0.41766 | 0.688 | 0.6  | 1 | HC_vs_MS.Trt_F |
| RHNO1    | 0.03763 | 0.3843  | 0.74  | 0.64 | 1 | HC_vs_MS.Trt_F |
| METTL18  | 0.03765 | -0.7962 | 0.061 | 0.1  | 1 | HC_vs_MS.Trt_F |
| SLITRK5  | 0.03774 | 0.28741 | 0.801 | 0.73 | 1 | HC_vs_MS.Trt_F |
| GNA12    | 0.03779 | -0.2576 | 0.113 | 0.07 | 1 | HC_vs_MS.Trt_F |
| SLC25A19 | 0.03804 | 0.6422  | 0.465 | 0.38 | 1 | HC_vs_MS.Trt_F |
| ZNF142   | 0.03806 | 0.7909  | 0.136 | 0.08 | 1 | HC_vs_MS.Trt_F |
| TANGO6   | 0.03809 | 0.29504 | 0.87  | 0.76 | 1 | HC_vs_MS.Trt_F |
| AP2S1    | 0.03815 | -0.3523 | 0.22  | 0.14 | 1 | HC_vs_MS.Trt_F |
| SLIT3    | 0.03821 | 0.94036 | 0.616 | 0.53 | 1 | HC_vs_MS.Trt_F |
| CHDH     | 0.03824 | -0.559  | 0.572 | 0.48 | 1 | HC_vs_MS.Trt_F |
| RSL24D1  | 0.03832 | -0.2779 | 0.309 | 0.22 | 1 | HC_vs_MS.Trt_F |

|          |         |         |       |      |   |                |
|----------|---------|---------|-------|------|---|----------------|
| HPF1     | 0.03845 | 0.25396 | 0.145 | 0.09 | 1 | HC_vs_MS.Trt_F |
| FAM9C    | 0.03851 | 0.30196 | 0.601 | 0.54 | 1 | HC_vs_MS.Trt_F |
| SFPQ     | 0.03854 | -0.2646 | 0.639 | 0.54 | 1 | HC_vs_MS.Trt_F |
| ABCC1    | 0.03856 | 0.47891 | 0.402 | 0.32 | 1 | HC_vs_MS.Trt_F |
| AKR7A2   | 0.03868 | 0.25668 | 0.165 | 0.1  | 1 | HC_vs_MS.Trt_F |
| ZDHHC2   | 0.03873 | -1.2664 | 0.116 | 0.17 | 1 | HC_vs_MS.Trt_F |
| HSBP1L1  | 0.03874 | 0.37477 | 0.431 | 0.35 | 1 | HC_vs_MS.Trt_F |
| AP4M1    | 0.03884 | -0.3011 | 0.671 | 0.58 | 1 | HC_vs_MS.Trt_F |
| CREBL2   | 0.03886 | 0.6797  | 0.168 | 0.11 | 1 | HC_vs_MS.Trt_F |
| ARHGEF26 | 0.03891 | 0.52169 | 0.595 | 0.49 | 1 | HC_vs_MS.Trt_F |
| OAT      | 0.03892 | 0.70044 | 0.156 | 0.1  | 1 | HC_vs_MS.Trt_F |
| SLC16A7  | 0.03893 | 0.82589 | 0.711 | 0.61 | 1 | HC_vs_MS.Trt_F |
| SLC26A11 | 0.03904 | 0.52007 | 0.697 | 0.6  | 1 | HC_vs_MS.Trt_F |
| RABGEF1  | 0.03906 | -0.2772 | 0.436 | 0.33 | 1 | HC_vs_MS.Trt_F |
| CHURC1   | 0.03907 | -0.3927 | 0.714 | 0.63 | 1 | HC_vs_MS.Trt_F |
| MED18    | 0.03915 | -0.4493 | 0.682 | 0.62 | 1 | HC_vs_MS.Trt_F |
| QSOX1    | 0.03915 | 0.54591 | 0.474 | 0.39 | 1 | HC_vs_MS.Trt_F |
| SERPINE1 | 0.03935 | 0.31911 | 0.266 | 0.19 | 1 | HC_vs_MS.Trt_F |
| SLC12A4  | 0.03954 | 0.68264 | 0.286 | 0.21 | 1 | HC_vs_MS.Trt_F |
| ARHGEF28 | 0.03955 | -0.2564 | 0.24  | 0.17 | 1 | HC_vs_MS.Trt_F |
| POLA1    | 0.03956 | 1.3048  | 0.136 | 0.08 | 1 | HC_vs_MS.Trt_F |
| CD84     | 0.03957 | 0.58486 | 0.76  | 0.72 | 1 | HC_vs_MS.Trt_F |
| TMEM241  | 0.03962 | 1.0071  | 0.694 | 0.61 | 1 | HC_vs_MS.Trt_F |
| SLC35D2  | 0.03966 | -1.222  | 0.064 | 0.11 | 1 | HC_vs_MS.Trt_F |
| INTS1    | 0.03986 | 1.00348 | 0.439 | 0.37 | 1 | HC_vs_MS.Trt_F |
| PTBP2    | 0.03991 | -0.992  | 0.682 | 0.55 | 1 | HC_vs_MS.Trt_F |
| NAA50    | 0.04    | -0.5186 | 0.512 | 0.43 | 1 | HC_vs_MS.Trt_F |
| ERVW-1   | 0.04003 | 0.40741 | 0.445 | 0.36 | 1 | HC_vs_MS.Trt_F |
| PLA2R1   | 0.04003 | 0.77219 | 0.592 | 0.64 | 1 | HC_vs_MS.Trt_F |
| TYW3     | 0.04005 | 0.50401 | 0.503 | 0.41 | 1 | HC_vs_MS.Trt_F |
| EXOC6    | 0.04007 | 1.02888 | 0.341 | 0.26 | 1 | HC_vs_MS.Trt_F |
| PELI1    | 0.04012 | 0.47586 | 0.237 | 0.17 | 1 | HC_vs_MS.Trt_F |
| UBA6     | 0.04012 | -0.2913 | 0.514 | 0.59 | 1 | HC_vs_MS.Trt_F |
| NUDT3    | 0.0402  | 0.33883 | 0.584 | 0.5  | 1 | HC_vs_MS.Trt_F |
| NUB1     | 0.04024 | 0.3106  | 0.876 | 0.85 | 1 | HC_vs_MS.Trt_F |
| CENPL    | 0.04032 | 0.50236 | 0.789 | 0.72 | 1 | HC_vs_MS.Trt_F |
| ABCB9    | 0.04094 | 0.45627 | 0.85  | 0.81 | 1 | HC_vs_MS.Trt_F |
| MCOLN1   | 0.04097 | 0.41674 | 0.806 | 0.78 | 1 | HC_vs_MS.Trt_F |
| ZNF780A  | 0.0412  | -0.4974 | 0.434 | 0.34 | 1 | HC_vs_MS.Trt_F |
| RCHY1    | 0.04139 | 0.31192 | 0.364 | 0.28 | 1 | HC_vs_MS.Trt_F |

|          |         |         |       |      |   |                |
|----------|---------|---------|-------|------|---|----------------|
| HDAC8    | 0.0414  | 0.67401 | 0.243 | 0.18 | 1 | HC_vs_MS.Trt_F |
| FAM192A  | 0.04146 | -0.6121 | 0.52  | 0.4  | 1 | HC_vs_MS.Trt_F |
| PHACTR3  | 0.04153 | 0.35824 | 0.176 | 0.12 | 1 | HC_vs_MS.Trt_F |
| THOP1    | 0.04168 | 0.34865 | 0.402 | 0.32 | 1 | HC_vs_MS.Trt_F |
| 6-Mar    | 0.04168 | -0.5722 | 0.827 | 0.83 | 1 | HC_vs_MS.Trt_F |
| KIAA1586 | 0.04181 | -1.5312 | 0.104 | 0.16 | 1 | HC_vs_MS.Trt_F |
| TGS1     | 0.04182 | 0.32081 | 0.217 | 0.16 | 1 | HC_vs_MS.Trt_F |
| TOM1     | 0.04183 | 0.29308 | 0.335 | 0.26 | 1 | HC_vs_MS.Trt_F |
| MYH3     | 0.0419  | 0.76926 | 0.699 | 0.6  | 1 | HC_vs_MS.Trt_F |
| TMEM218  | 0.04191 | -1.9339 | 0.116 | 0.16 | 1 | HC_vs_MS.Trt_F |
| WDR26    | 0.04192 | 0.59134 | 0.717 | 0.63 | 1 | HC_vs_MS.Trt_F |
| EIF3I    | 0.04202 | 0.33037 | 0.613 | 0.54 | 1 | HC_vs_MS.Trt_F |
| RNF2     | 0.04203 | 0.48657 | 0.494 | 0.4  | 1 | HC_vs_MS.Trt_F |
| KIAA0408 | 0.04204 | 0.56918 | 0.376 | 0.29 | 1 | HC_vs_MS.Trt_F |
| STMN3    | 0.04207 | 1.28737 | 0.249 | 0.18 | 1 | HC_vs_MS.Trt_F |
| CCDC149  | 0.04207 | 0.56734 | 0.468 | 0.37 | 1 | HC_vs_MS.Trt_F |
| SUDS3    | 0.04207 | 0.56589 | 0.841 | 0.81 | 1 | HC_vs_MS.Trt_F |
| NBPF26   | 0.04214 | 0.83199 | 0.35  | 0.27 | 1 | HC_vs_MS.Trt_F |
| LY6G5B   | 0.04228 | 0.32682 | 0.864 | 0.82 | 1 | HC_vs_MS.Trt_F |
| PARP2    | 0.0423  | 1.67451 | 0.436 | 0.34 | 1 | HC_vs_MS.Trt_F |
| AHR      | 0.0423  | 0.28347 | 0.688 | 0.65 | 1 | HC_vs_MS.Trt_F |
| GRID1    | 0.04235 | -0.5518 | 0.098 | 0.15 | 1 | HC_vs_MS.Trt_F |
| IGF1R    | 0.04242 | 0.30233 | 0.387 | 0.29 | 1 | HC_vs_MS.Trt_F |
| AHCY     | 0.04253 | -1.4884 | 0.098 | 0.15 | 1 | HC_vs_MS.Trt_F |
| PLEKHJ1  | 0.04257 | 0.31978 | 0.821 | 0.78 | 1 | HC_vs_MS.Trt_F |
| LSG1     | 0.043   | -0.2868 | 0.503 | 0.41 | 1 | HC_vs_MS.Trt_F |
| ARHGEF7  | 0.04309 | 0.31636 | 0.303 | 0.23 | 1 | HC_vs_MS.Trt_F |
| CDK16    | 0.04327 | 0.35799 | 0.254 | 0.18 | 1 | HC_vs_MS.Trt_F |
| MTMR9    | 0.04338 | 0.32325 | 0.361 | 0.28 | 1 | HC_vs_MS.Trt_F |
| STX7     | 0.04358 | 0.28182 | 0.795 | 0.72 | 1 | HC_vs_MS.Trt_F |
| LEMD3    | 0.04367 | -0.3732 | 0.714 | 0.59 | 1 | HC_vs_MS.Trt_F |
| CCNB1IP1 | 0.04375 | 0.35873 | 0.858 | 0.78 | 1 | HC_vs_MS.Trt_F |
| ACAT2    | 0.0439  | 1.45977 | 0.295 | 0.23 | 1 | HC_vs_MS.Trt_F |
| TWSG1    | 0.04391 | 0.41169 | 0.454 | 0.37 | 1 | HC_vs_MS.Trt_F |
| ATOX1    | 0.04392 | 1.28037 | 0.277 | 0.21 | 1 | HC_vs_MS.Trt_F |
| VPS13D   | 0.04393 | -0.7216 | 0.344 | 0.25 | 1 | HC_vs_MS.Trt_F |
| CCDC50   | 0.04408 | 0.30071 | 0.503 | 0.42 | 1 | HC_vs_MS.Trt_F |
| PPP4R1   | 0.04419 | 0.44035 | 0.295 | 0.21 | 1 | HC_vs_MS.Trt_F |
| KMT2C    | 0.04426 | 0.26707 | 0.451 | 0.37 | 1 | HC_vs_MS.Trt_F |
| RARA     | 0.0446  | 0.71068 | 0.162 | 0.11 | 1 | HC_vs_MS.Trt_F |

|          |         |         |       |      |   |                |
|----------|---------|---------|-------|------|---|----------------|
| BMPR2    | 0.04464 | 0.51762 | 0.604 | 0.54 | 1 | HC_vs_MS.Trt_F |
| C9orf3   | 0.04466 | 0.47005 | 0.78  | 0.7  | 1 | HC_vs_MS.Trt_F |
| CCDC180  | 0.04469 | 0.29668 | 0.818 | 0.71 | 1 | HC_vs_MS.Trt_F |
| ATP8B3   | 0.04471 | 0.35671 | 0.847 | 0.78 | 1 | HC_vs_MS.Trt_F |
| PIK3R4   | 0.04474 | 0.8634  | 0.182 | 0.12 | 1 | HC_vs_MS.Trt_F |
| GTF3C5   | 0.04483 | 0.35412 | 0.35  | 0.27 | 1 | HC_vs_MS.Trt_F |
| SYF2     | 0.04486 | 0.41864 | 0.5   | 0.41 | 1 | HC_vs_MS.Trt_F |
| TRIB3    | 0.04489 | -0.7632 | 0.121 | 0.07 | 1 | HC_vs_MS.Trt_F |
| ZNF627   | 0.0452  | 1.18873 | 0.633 | 0.55 | 1 | HC_vs_MS.Trt_F |
| SNRK     | 0.0452  | 0.80608 | 0.52  | 0.45 | 1 | HC_vs_MS.Trt_F |
| HAUS7    | 0.04527 | 0.34053 | 0.147 | 0.09 | 1 | HC_vs_MS.Trt_F |
| PLG      | 0.0453  | 0.59446 | 0.254 | 0.19 | 1 | HC_vs_MS.Trt_F |
| FBXL17   | 0.04533 | 1.62117 | 0.324 | 0.24 | 1 | HC_vs_MS.Trt_F |
| SLC25A35 | 0.04538 | 0.65232 | 0.202 | 0.14 | 1 | HC_vs_MS.Trt_F |
| ATP6V1H  | 0.04539 | 0.7179  | 0.434 | 0.37 | 1 | HC_vs_MS.Trt_F |
| IFT74    | 0.04541 | 0.26536 | 0.465 | 0.37 | 1 | HC_vs_MS.Trt_F |
| G2E3     | 0.04547 | -0.3028 | 0.549 | 0.46 | 1 | HC_vs_MS.Trt_F |
| ZNF525   | 0.04547 | 0.8792  | 0.673 | 0.59 | 1 | HC_vs_MS.Trt_F |
| BAG3     | 0.04555 | 0.87396 | 0.118 | 0.07 | 1 | HC_vs_MS.Trt_F |
| NUCKS1   | 0.04558 | -0.5972 | 0.5   | 0.52 | 1 | HC_vs_MS.Trt_F |
| PHLDB1   | 0.04565 | 0.64508 | 0.986 | 0.98 | 1 | HC_vs_MS.Trt_F |
| ATF1     | 0.04577 | 0.89886 | 0.191 | 0.13 | 1 | HC_vs_MS.Trt_F |
| COLEC11  | 0.04584 | 0.43451 | 0.393 | 0.31 | 1 | HC_vs_MS.Trt_F |
| NGDN     | 0.04603 | -0.3575 | 0.367 | 0.28 | 1 | HC_vs_MS.Trt_F |
| PCCB     | 0.04613 | 0.40916 | 0.679 | 0.63 | 1 | HC_vs_MS.Trt_F |
| ATP13A4  | 0.04623 | 0.41885 | 0.503 | 0.42 | 1 | HC_vs_MS.Trt_F |
| SLC7A6   | 0.04633 | 0.38843 | 0.555 | 0.49 | 1 | HC_vs_MS.Trt_F |
| GPX1     | 0.04638 | 0.31038 | 0.205 | 0.14 | 1 | HC_vs_MS.Trt_F |
| MSRB1    | 0.0467  | -0.4992 | 0.13  | 0.08 | 1 | HC_vs_MS.Trt_F |
| MATN2    | 0.04687 | -0.4031 | 0.613 | 0.52 | 1 | HC_vs_MS.Trt_F |
| NOM1     | 0.04698 | 0.44769 | 0.714 | 0.62 | 1 | HC_vs_MS.Trt_F |
| HAT1     | 0.04706 | 0.35352 | 0.884 | 0.87 | 1 | HC_vs_MS.Trt_F |
| EPS15L1  | 0.04708 | 0.38266 | 0.827 | 0.8  | 1 | HC_vs_MS.Trt_F |
| EPM2AIP1 | 0.04709 | 0.34343 | 0.309 | 0.23 | 1 | HC_vs_MS.Trt_F |
| HERC5    | 0.04717 | 0.55324 | 0.214 | 0.15 | 1 | HC_vs_MS.Trt_F |
| VSTM4    | 0.04728 | 0.99433 | 0.777 | 0.68 | 1 | HC_vs_MS.Trt_F |
| TTC21B   | 0.04729 | 0.56169 | 0.416 | 0.34 | 1 | HC_vs_MS.Trt_F |
| ZNF585B  | 0.04746 | 0.58641 | 0.772 | 0.65 | 1 | HC_vs_MS.Trt_F |
| CLASP2   | 0.04752 | 0.74087 | 0.751 | 0.67 | 1 | HC_vs_MS.Trt_F |
| MAT2B    | 0.0477  | -0.7348 | 0.746 | 0.76 | 1 | HC_vs_MS.Trt_F |

|           |         |         |       |      |   |                |
|-----------|---------|---------|-------|------|---|----------------|
| TAB2      | 0.04772 | 0.26483 | 0.578 | 0.49 | 1 | HC_vs_MS.Trt_F |
| HERC3     | 0.04774 | 0.57519 | 0.341 | 0.27 | 1 | HC_vs_MS.Trt_F |
| TDRD1     | 0.04781 | 0.77707 | 0.225 | 0.16 | 1 | HC_vs_MS.Trt_F |
| CORO7-PAN | 0.04793 | 0.96869 | 0.156 | 0.1  | 1 | HC_vs_MS.Trt_F |
| CEP290    | 0.04806 | -0.2986 | 0.173 | 0.11 | 1 | HC_vs_MS.Trt_F |
| STK25     | 0.04819 | -0.5209 | 0.76  | 0.63 | 1 | HC_vs_MS.Trt_F |
| CCDC24    | 0.04825 | -0.2762 | 0.714 | 0.75 | 1 | HC_vs_MS.Trt_F |
| SOD1      | 0.04832 | 0.25598 | 0.717 | 0.68 | 1 | HC_vs_MS.Trt_F |
| PDZK1     | 0.04842 | 0.47433 | 0.355 | 0.28 | 1 | HC_vs_MS.Trt_F |
| TSPYL4    | 0.0486  | 0.4017  | 0.168 | 0.11 | 1 | HC_vs_MS.Trt_F |
| CD109     | 0.04871 | 0.47433 | 0.477 | 0.4  | 1 | HC_vs_MS.Trt_F |
| ITSN1     | 0.04874 | 0.38603 | 0.936 | 0.85 | 1 | HC_vs_MS.Trt_F |
| ZBED1     | 0.04898 | 0.58962 | 0.546 | 0.47 | 1 | HC_vs_MS.Trt_F |
| SIK2      | 0.04905 | 0.28686 | 0.763 | 0.69 | 1 | HC_vs_MS.Trt_F |
| MAPRE1    | 0.04908 | 0.3186  | 0.28  | 0.21 | 1 | HC_vs_MS.Trt_F |
| SLC5A10   | 0.04909 | -1.0275 | 0.058 | 0.1  | 1 | HC_vs_MS.Trt_F |
| RUNX1T1   | 0.04912 | 0.28441 | 0.249 | 0.18 | 1 | HC_vs_MS.Trt_F |
| SCAF8     | 0.04937 | -0.2692 | 0.301 | 0.22 | 1 | HC_vs_MS.Trt_F |
| H2AFV     | 0.04945 | 0.46844 | 0.691 | 0.64 | 1 | HC_vs_MS.Trt_F |
| IL12RB2   | 0.04965 | 0.48168 | 0.162 | 0.11 | 1 | HC_vs_MS.Trt_F |
| SPAG7     | 0.04967 | 0.46533 | 0.893 | 0.83 | 1 | HC_vs_MS.Trt_F |
| SLAIN2    | 0.05008 | -0.6744 | 0.162 | 0.21 | 1 | HC_vs_MS.Trt_F |
| PRPF4B    | 0.05025 | -0.4886 | 0.364 | 0.28 | 1 | HC_vs_MS.Trt_F |
| NUP62     | 0.0503  | 0.28006 | 0.587 | 0.5  | 1 | HC_vs_MS.Trt_F |
| PFKM      | 0.05031 | -0.3881 | 0.884 | 0.87 | 1 | HC_vs_MS.Trt_F |
| VRK2      | 0.05032 | -0.2628 | 0.295 | 0.22 | 1 | HC_vs_MS.Trt_F |
| BORCS7    | 0.0505  | 0.60909 | 0.419 | 0.33 | 1 | HC_vs_MS.Trt_F |
| TMEM55A   | 0.05056 | 1.37408 | 0.113 | 0.07 | 1 | HC_vs_MS.Trt_F |
| ALKBH5    | 0.05068 | 0.29623 | 0.208 | 0.14 | 1 | HC_vs_MS.Trt_F |
| BET1L     | 0.05089 | 0.26092 | 0.251 | 0.18 | 1 | HC_vs_MS.Trt_F |
| PRRG4     | 0.05104 | 0.28249 | 0.85  | 0.81 | 1 | HC_vs_MS.Trt_F |
| EMP1      | 0.05108 | 0.7027  | 0.225 | 0.16 | 1 | HC_vs_MS.Trt_F |
| ERN1      | 0.05126 | 0.27138 | 0.795 | 0.77 | 1 | HC_vs_MS.Trt_F |
| TRMT12    | 0.05137 | -0.3489 | 0.512 | 0.39 | 1 | HC_vs_MS.Trt_F |
| EMC2      | 0.0515  | 0.53451 | 0.517 | 0.43 | 1 | HC_vs_MS.Trt_F |
| RASGRF2   | 0.05154 | 0.92953 | 0.228 | 0.17 | 1 | HC_vs_MS.Trt_F |
| DCAF1     | 0.05157 | 0.28764 | 0.225 | 0.17 | 1 | HC_vs_MS.Trt_F |
| GAB3      | 0.05158 | -0.5666 | 0.451 | 0.36 | 1 | HC_vs_MS.Trt_F |
| PDE1B     | 0.05193 | 0.42599 | 0.601 | 0.51 | 1 | HC_vs_MS.Trt_F |
| HDAC2     | 0.05194 | 0.42994 | 0.74  | 0.66 | 1 | HC_vs_MS.Trt_F |

|           |         |         |       |      |   |                |
|-----------|---------|---------|-------|------|---|----------------|
| CD7       | 0.05196 | 0.68115 | 0.289 | 0.22 | 1 | HC_vs_MS.Trt_F |
| IDH3B     | 0.05241 | 0.29993 | 0.237 | 0.17 | 1 | HC_vs_MS.Trt_F |
| C6orf223  | 0.05245 | 0.39085 | 0.286 | 0.22 | 1 | HC_vs_MS.Trt_F |
| FAM193A   | 0.0525  | 0.31972 | 0.341 | 0.27 | 1 | HC_vs_MS.Trt_F |
| C9orf131  | 0.05261 | 0.93682 | 0.182 | 0.13 | 1 | HC_vs_MS.Trt_F |
| COMTD1    | 0.05262 | -0.3413 | 0.173 | 0.11 | 1 | HC_vs_MS.Trt_F |
| DYNLT1    | 0.05289 | 0.62629 | 0.587 | 0.51 | 1 | HC_vs_MS.Trt_F |
| C14orf169 | 0.05291 | -1.1213 | 0.066 | 0.11 | 1 | HC_vs_MS.Trt_F |
| NAGK      | 0.05309 | 0.29261 | 0.832 | 0.76 | 1 | HC_vs_MS.Trt_F |
| PLD2      | 0.05316 | 0.41825 | 0.142 | 0.09 | 1 | HC_vs_MS.Trt_F |
| BMT2      | 0.05329 | 1.4375  | 0.136 | 0.09 | 1 | HC_vs_MS.Trt_F |
| ZEB2      | 0.0535  | -0.7997 | 0.647 | 0.69 | 1 | HC_vs_MS.Trt_F |
| BRD2      | 0.05362 | 0.27037 | 0.679 | 0.6  | 1 | HC_vs_MS.Trt_F |
| EED       | 0.05364 | -0.5833 | 0.231 | 0.16 | 1 | HC_vs_MS.Trt_F |
| HDAC7     | 0.05364 | 0.85003 | 0.321 | 0.26 | 1 | HC_vs_MS.Trt_F |
| PHACTR2   | 0.05388 | -0.7593 | 0.598 | 0.64 | 1 | HC_vs_MS.Trt_F |
| PURA      | 0.05402 | -0.697  | 0.136 | 0.09 | 1 | HC_vs_MS.Trt_F |
| NXN       | 0.05409 | 0.31275 | 0.578 | 0.5  | 1 | HC_vs_MS.Trt_F |
| DDX18     | 0.05418 | -0.3023 | 0.798 | 0.69 | 1 | HC_vs_MS.Trt_F |
| DENND4A   | 0.05422 | 0.66347 | 0.439 | 0.38 | 1 | HC_vs_MS.Trt_F |
| CSNK1D    | 0.05422 | 0.38088 | 0.954 | 0.92 | 1 | HC_vs_MS.Trt_F |
| DNM3      | 0.05427 | 1.12201 | 0.121 | 0.08 | 1 | HC_vs_MS.Trt_F |
| DYM       | 0.05431 | 0.3492  | 0.74  | 0.69 | 1 | HC_vs_MS.Trt_F |
| FLT4      | 0.05438 | 0.50805 | 0.124 | 0.08 | 1 | HC_vs_MS.Trt_F |
| RPP30     | 0.05441 | 0.58607 | 0.679 | 0.64 | 1 | HC_vs_MS.Trt_F |
| NADK      | 0.05446 | -0.3015 | 0.306 | 0.23 | 1 | HC_vs_MS.Trt_F |
| MRPS30    | 0.05449 | -0.4186 | 0.312 | 0.37 | 1 | HC_vs_MS.Trt_F |
| ASCC1     | 0.05454 | 0.66204 | 0.714 | 0.61 | 1 | HC_vs_MS.Trt_F |
| MMP11     | 0.05457 | 0.58609 | 0.431 | 0.36 | 1 | HC_vs_MS.Trt_F |
| SUN2      | 0.05467 | 0.25453 | 0.422 | 0.35 | 1 | HC_vs_MS.Trt_F |
| KRIT1     | 0.05487 | 0.72511 | 0.673 | 0.6  | 1 | HC_vs_MS.Trt_F |
| ANAPC15   | 0.05487 | -0.4415 | 0.815 | 0.76 | 1 | HC_vs_MS.Trt_F |
| VAMP1     | 0.05498 | 0.39691 | 0.185 | 0.13 | 1 | HC_vs_MS.Trt_F |
| ICE2      | 0.0551  | -0.2805 | 0.882 | 0.84 | 1 | HC_vs_MS.Trt_F |
| TBC1D12   | 0.05512 | 0.33549 | 0.445 | 0.38 | 1 | HC_vs_MS.Trt_F |
| AGFG2     | 0.05538 | 0.34612 | 0.355 | 0.28 | 1 | HC_vs_MS.Trt_F |
| MFSD12    | 0.05538 | 0.70692 | 0.295 | 0.22 | 1 | HC_vs_MS.Trt_F |
| RIOK2     | 0.05545 | -0.2795 | 0.39  | 0.31 | 1 | HC_vs_MS.Trt_F |
| FOXP3     | 0.05554 | 0.54602 | 0.503 | 0.42 | 1 | HC_vs_MS.Trt_F |
| SYNJ2     | 0.05568 | 0.29941 | 0.928 | 0.9  | 1 | HC_vs_MS.Trt_F |

|            |         |         |       |      |   |                |
|------------|---------|---------|-------|------|---|----------------|
| YWHAЕ      | 0.05572 | -0.6064 | 0.431 | 0.47 | 1 | HC_vs_MS.Trt_F |
| RYBP       | 0.05579 | 0.44451 | 0.113 | 0.07 | 1 | HC_vs_MS.Trt_F |
| PIGT       | 0.05587 | 1.17556 | 0.147 | 0.1  | 1 | HC_vs_MS.Trt_F |
| WDR70      | 0.05593 | 0.60766 | 0.315 | 0.23 | 1 | HC_vs_MS.Trt_F |
| FOXRED2    | 0.05597 | -0.254  | 0.59  | 0.5  | 1 | HC_vs_MS.Trt_F |
| UPK3BL     | 0.05601 | -0.495  | 0.532 | 0.58 | 1 | HC_vs_MS.Trt_F |
| UMAD1      | 0.05609 | -0.3222 | 0.22  | 0.16 | 1 | HC_vs_MS.Trt_F |
| RTN3       | 0.05615 | 0.41873 | 0.211 | 0.16 | 1 | HC_vs_MS.Trt_F |
| ZSCAN29    | 0.05617 | -0.7417 | 0.445 | 0.48 | 1 | HC_vs_MS.Trt_F |
| FOXRED1    | 0.05621 | 1.52585 | 0.549 | 0.48 | 1 | HC_vs_MS.Trt_F |
| GET4       | 0.05628 | 0.29403 | 0.535 | 0.45 | 1 | HC_vs_MS.Trt_F |
| RAB3GAP1   | 0.05631 | -0.4292 | 0.402 | 0.31 | 1 | HC_vs_MS.Trt_F |
| RP11-613M: | 0.0566  | 0.26374 | 0.22  | 0.16 | 1 | HC_vs_MS.Trt_F |
| RPL36AL    | 0.05665 | -0.5674 | 0.509 | 0.53 | 1 | HC_vs_MS.Trt_F |
| LRRС8A     | 0.05677 | 0.28525 | 0.173 | 0.12 | 1 | HC_vs_MS.Trt_F |
| TP63       | 0.0568  | 0.5372  | 0.465 | 0.39 | 1 | HC_vs_MS.Trt_F |
| KCNMB3     | 0.05705 | -0.5215 | 0.465 | 0.38 | 1 | HC_vs_MS.Trt_F |
| ALS2       | 0.05707 | -0.5762 | 0.497 | 0.4  | 1 | HC_vs_MS.Trt_F |
| CD83       | 0.0571  | 0.87436 | 0.179 | 0.13 | 1 | HC_vs_MS.Trt_F |
| LNPEP      | 0.05716 | 0.34478 | 0.598 | 0.53 | 1 | HC_vs_MS.Trt_F |
| PMPCA      | 0.05717 | 0.32018 | 0.775 | 0.71 | 1 | HC_vs_MS.Trt_F |
| OSBPL3     | 0.05724 | 0.26285 | 0.532 | 0.45 | 1 | HC_vs_MS.Trt_F |
| SMURF2     | 0.05724 | 0.93841 | 0.801 | 0.72 | 1 | HC_vs_MS.Trt_F |
| DHRS3      | 0.05735 | -0.6765 | 0.338 | 0.25 | 1 | HC_vs_MS.Trt_F |
| PHB        | 0.05743 | 0.31992 | 0.199 | 0.14 | 1 | HC_vs_MS.Trt_F |
| XPA        | 0.05758 | 0.56193 | 0.208 | 0.15 | 1 | HC_vs_MS.Trt_F |
| RBKS       | 0.05759 | 0.82264 | 0.145 | 0.1  | 1 | HC_vs_MS.Trt_F |
| SART1      | 0.05759 | 0.70225 | 0.37  | 0.29 | 1 | HC_vs_MS.Trt_F |
| EVI2B      | 0.05766 | 0.33334 | 0.289 | 0.22 | 1 | HC_vs_MS.Trt_F |
| PTPRG      | 0.0577  | 1.11663 | 0.295 | 0.23 | 1 | HC_vs_MS.Trt_F |
| RRP15      | 0.05773 | -0.4339 | 0.636 | 0.53 | 1 | HC_vs_MS.Trt_F |
| SFT2D3     | 0.05775 | -0.5151 | 0.535 | 0.45 | 1 | HC_vs_MS.Trt_F |
| POLQ       | 0.05777 | 0.44386 | 0.618 | 0.53 | 1 | HC_vs_MS.Trt_F |
| PECAM1     | 0.05799 | 0.26468 | 0.798 | 0.75 | 1 | HC_vs_MS.Trt_F |
| HNRNPF     | 0.05805 | -0.6274 | 0.335 | 0.39 | 1 | HC_vs_MS.Trt_F |
| EEA1       | 0.05815 | -0.3307 | 0.277 | 0.21 | 1 | HC_vs_MS.Trt_F |
| SEC22B     | 0.05821 | -0.7719 | 0.829 | 0.85 | 1 | HC_vs_MS.Trt_F |
| APOBEC3A   | 0.05839 | 0.2654  | 0.462 | 0.38 | 1 | HC_vs_MS.Trt_F |
| ILVBL      | 0.05841 | -0.7618 | 0.318 | 0.23 | 1 | HC_vs_MS.Trt_F |
| UBAP1L     | 0.05843 | 0.79806 | 0.399 | 0.32 | 1 | HC_vs_MS.Trt_F |

|          |         |         |       |      |   |                |
|----------|---------|---------|-------|------|---|----------------|
| RNF207   | 0.05844 | -0.4303 | 0.725 | 0.74 | 1 | HC_vs_MS.Trt_F |
| WDR48    | 0.05849 | -0.3995 | 0.211 | 0.14 | 1 | HC_vs_MS.Trt_F |
| ZNF460   | 0.0585  | 0.62569 | 0.22  | 0.16 | 1 | HC_vs_MS.Trt_F |
| STMN1    | 0.05856 | 0.30272 | 0.775 | 0.73 | 1 | HC_vs_MS.Trt_F |
| GATAD1   | 0.05866 | 0.27149 | 0.896 | 0.86 | 1 | HC_vs_MS.Trt_F |
| HSD3B7   | 0.05879 | 0.34288 | 0.506 | 0.42 | 1 | HC_vs_MS.Trt_F |
| CEP85L   | 0.05879 | 0.30027 | 0.292 | 0.22 | 1 | HC_vs_MS.Trt_F |
| SLC27A1  | 0.05882 | 0.37517 | 0.87  | 0.78 | 1 | HC_vs_MS.Trt_F |
| MITF     | 0.05894 | 0.28026 | 0.199 | 0.14 | 1 | HC_vs_MS.Trt_F |
| UGDH     | 0.05905 | -0.4482 | 0.584 | 0.64 | 1 | HC_vs_MS.Trt_F |
| RGS9     | 0.05926 | 0.41796 | 0.633 | 0.57 | 1 | HC_vs_MS.Trt_F |
| VMAC     | 0.05934 | 0.4322  | 0.691 | 0.63 | 1 | HC_vs_MS.Trt_F |
| SYNPO    | 0.05942 | 0.29118 | 0.237 | 0.18 | 1 | HC_vs_MS.Trt_F |
| ZNF134   | 0.05947 | 1.26531 | 0.194 | 0.14 | 1 | HC_vs_MS.Trt_F |
| KCNMB4   | 0.05951 | 0.40077 | 0.37  | 0.31 | 1 | HC_vs_MS.Trt_F |
| NME1     | 0.05955 | 0.31068 | 0.639 | 0.73 | 1 | HC_vs_MS.Trt_F |
| ABI2     | 0.05956 | 0.39601 | 0.899 | 0.84 | 1 | HC_vs_MS.Trt_F |
| RECQL5   | 0.05976 | 1.42873 | 0.257 | 0.19 | 1 | HC_vs_MS.Trt_F |
| PRPF18   | 0.05993 | 0.69969 | 0.165 | 0.11 | 1 | HC_vs_MS.Trt_F |
| ANKMY1   | 0.05996 | 0.67241 | 0.462 | 0.37 | 1 | HC_vs_MS.Trt_F |
| SOCS1    | 0.05999 | 0.81013 | 0.139 | 0.09 | 1 | HC_vs_MS.Trt_F |
| TVP23B   | 0.05999 | 0.33533 | 0.647 | 0.57 | 1 | HC_vs_MS.Trt_F |
| NDUFB6   | 0.06028 | 0.36321 | 0.561 | 0.49 | 1 | HC_vs_MS.Trt_F |
| CES3     | 0.0603  | 0.55121 | 0.327 | 0.26 | 1 | HC_vs_MS.Trt_F |
| HNRNPUL1 | 0.06035 | 0.6483  | 0.705 | 0.66 | 1 | HC_vs_MS.Trt_F |
| ZNF195   | 0.0604  | 0.52492 | 0.621 | 0.53 | 1 | HC_vs_MS.Trt_F |
| SMG9     | 0.06052 | -0.2813 | 0.688 | 0.59 | 1 | HC_vs_MS.Trt_F |
| BCCIP    | 0.06056 | 0.64661 | 0.228 | 0.17 | 1 | HC_vs_MS.Trt_F |
| ESRP1    | 0.06061 | -0.7363 | 0.165 | 0.22 | 1 | HC_vs_MS.Trt_F |
| ZNF354B  | 0.06062 | 0.37522 | 0.361 | 0.29 | 1 | HC_vs_MS.Trt_F |
| SLC20A2  | 0.06076 | 0.76822 | 0.179 | 0.13 | 1 | HC_vs_MS.Trt_F |
| RHOT1    | 0.06084 | 0.52234 | 0.254 | 0.18 | 1 | HC_vs_MS.Trt_F |
| CENPV    | 0.06088 | 0.5012  | 0.801 | 0.72 | 1 | HC_vs_MS.Trt_F |
| MPP6     | 0.06101 | 1.17017 | 0.335 | 0.26 | 1 | HC_vs_MS.Trt_F |
| HIVEP1   | 0.06101 | 0.48395 | 0.665 | 0.63 | 1 | HC_vs_MS.Trt_F |
| HS3ST3B1 | 0.06104 | -0.4791 | 0.46  | 0.52 | 1 | HC_vs_MS.Trt_F |
| ANKRD6   | 0.06105 | 0.399   | 0.197 | 0.14 | 1 | HC_vs_MS.Trt_F |
| SERGEF   | 0.06126 | 0.32085 | 0.185 | 0.13 | 1 | HC_vs_MS.Trt_F |
| CAMK2G   | 0.06126 | 0.25205 | 0.676 | 0.58 | 1 | HC_vs_MS.Trt_F |
| LECT2    | 0.06127 | 0.39907 | 0.191 | 0.14 | 1 | HC_vs_MS.Trt_F |



|          |         |         |       |      |   |                |
|----------|---------|---------|-------|------|---|----------------|
| TADA3    | 0.06139 | 0.4689  | 0.616 | 0.53 | 1 | HC_vs_MS.Trt_F |
| PTPRB    | 0.06147 | 0.30717 | 0.624 | 0.54 | 1 | HC_vs_MS.Trt_F |
| NAA10    | 0.0615  | 0.55677 | 0.448 | 0.38 | 1 | HC_vs_MS.Trt_F |
| HSPA4    | 0.06152 | 0.27946 | 0.434 | 0.35 | 1 | HC_vs_MS.Trt_F |
| RNF41    | 0.06155 | -0.3452 | 0.801 | 0.72 | 1 | HC_vs_MS.Trt_F |
| ZNF816   | 0.06158 | -0.7622 | 0.506 | 0.43 | 1 | HC_vs_MS.Trt_F |
| YWHAH    | 0.06168 | 0.48362 | 0.246 | 0.19 | 1 | HC_vs_MS.Trt_F |
| KIAA0556 | 0.06187 | 0.77131 | 0.358 | 0.28 | 1 | HC_vs_MS.Trt_F |
| CMTM3    | 0.06197 | 0.64394 | 0.243 | 0.18 | 1 | HC_vs_MS.Trt_F |
| FAM159A  | 0.06203 | 0.58148 | 0.63  | 0.52 | 1 | HC_vs_MS.Trt_F |
| LGALS9   | 0.06209 | 0.53975 | 0.298 | 0.22 | 1 | HC_vs_MS.Trt_F |
| FSTL4    | 0.06221 | 0.38565 | 0.246 | 0.18 | 1 | HC_vs_MS.Trt_F |
| INO80E   | 0.06229 | 0.68836 | 0.22  | 0.16 | 1 | HC_vs_MS.Trt_F |
| UHMK1    | 0.06246 | -0.3452 | 0.329 | 0.26 | 1 | HC_vs_MS.Trt_F |
| PIGF     | 0.06279 | -0.2865 | 0.13  | 0.08 | 1 | HC_vs_MS.Trt_F |
| TNIP1    | 0.06286 | 1.02398 | 0.355 | 0.3  | 1 | HC_vs_MS.Trt_F |
| EZH1     | 0.063   | 0.43067 | 0.939 | 0.88 | 1 | HC_vs_MS.Trt_F |
| TRIM2    | 0.06306 | 0.60847 | 0.251 | 0.19 | 1 | HC_vs_MS.Trt_F |
| DDA1     | 0.06312 | 0.35843 | 0.598 | 0.52 | 1 | HC_vs_MS.Trt_F |
| CAPRN1   | 0.06335 | -0.2569 | 0.347 | 0.26 | 1 | HC_vs_MS.Trt_F |
| ZNF720   | 0.06337 | 0.73689 | 0.584 | 0.5  | 1 | HC_vs_MS.Trt_F |
| TRAF2    | 0.0639  | -1.063  | 0.214 | 0.26 | 1 | HC_vs_MS.Trt_F |
| DENND2D  | 0.06399 | -0.358  | 0.338 | 0.39 | 1 | HC_vs_MS.Trt_F |
| UBE3B    | 0.06405 | 0.76281 | 0.393 | 0.33 | 1 | HC_vs_MS.Trt_F |
| PSMG2    | 0.0641  | 0.313   | 0.225 | 0.17 | 1 | HC_vs_MS.Trt_F |
| TMEM263  | 0.06418 | -0.5663 | 0.465 | 0.39 | 1 | HC_vs_MS.Trt_F |
| RPS26    | 0.06429 | -0.3061 | 0.702 | 0.69 | 1 | HC_vs_MS.Trt_F |
| FASN     | 0.06439 | 1.6602  | 0.171 | 0.12 | 1 | HC_vs_MS.Trt_F |
| KCTD9    | 0.0647  | -1.1362 | 0.263 | 0.19 | 1 | HC_vs_MS.Trt_F |
| RPGR     | 0.06471 | 1.08806 | 0.11  | 0.07 | 1 | HC_vs_MS.Trt_F |
| BMF      | 0.06472 | -0.5035 | 0.15  | 0.1  | 1 | HC_vs_MS.Trt_F |
| TTC31    | 0.06477 | 0.85253 | 0.246 | 0.19 | 1 | HC_vs_MS.Trt_F |
| PLBD2    | 0.06479 | 0.72856 | 0.41  | 0.34 | 1 | HC_vs_MS.Trt_F |
| ANAPC5   | 0.06512 | 0.2987  | 0.962 | 0.94 | 1 | HC_vs_MS.Trt_F |
| CCDC58   | 0.06519 | 0.36676 | 0.35  | 0.27 | 1 | HC_vs_MS.Trt_F |
| CUBN     | 0.06547 | 0.85105 | 0.477 | 0.39 | 1 | HC_vs_MS.Trt_F |
| ZBTB46   | 0.06549 | 0.40681 | 0.136 | 0.09 | 1 | HC_vs_MS.Trt_F |
| ZNF764   | 0.06551 | 0.69719 | 0.399 | 0.33 | 1 | HC_vs_MS.Trt_F |
| PHLDA3   | 0.06564 | 0.48725 | 0.425 | 0.35 | 1 | HC_vs_MS.Trt_F |
| DNAL1    | 0.06576 | 0.38658 | 0.951 | 0.9  | 1 | HC_vs_MS.Trt_F |

|           |         |         |       |      |   |                |
|-----------|---------|---------|-------|------|---|----------------|
| ROCK1     | 0.06576 | 0.28119 | 0.751 | 0.68 | 1 | HC_vs_MS.Trt_F |
| ZDHHC21   | 0.06584 | -0.5236 | 0.301 | 0.23 | 1 | HC_vs_MS.Trt_F |
| FOXN3     | 0.06589 | 0.34281 | 0.913 | 0.88 | 1 | HC_vs_MS.Trt_F |
| FEZ2      | 0.06598 | 1.17339 | 0.54  | 0.46 | 1 | HC_vs_MS.Trt_F |
| SERPINA10 | 0.06605 | 0.26543 | 0.627 | 0.53 | 1 | HC_vs_MS.Trt_F |
| ZNF664    | 0.06612 | 0.52174 | 0.301 | 0.23 | 1 | HC_vs_MS.Trt_F |
| FKBP10    | 0.06613 | 0.46281 | 0.428 | 0.35 | 1 | HC_vs_MS.Trt_F |
| ZNF780B   | 0.06654 | -0.709  | 0.584 | 0.64 | 1 | HC_vs_MS.Trt_F |
| TPGS1     | 0.0666  | 0.99595 | 0.312 | 0.39 | 1 | HC_vs_MS.Trt_F |
| MEIS2     | 0.06661 | 0.39485 | 0.225 | 0.17 | 1 | HC_vs_MS.Trt_F |
| SWSAP1    | 0.06681 | 0.57207 | 0.783 | 0.7  | 1 | HC_vs_MS.Trt_F |
| TLE4      | 0.06704 | 0.28174 | 0.199 | 0.14 | 1 | HC_vs_MS.Trt_F |
| RABEP2    | 0.06743 | 0.52084 | 0.566 | 0.52 | 1 | HC_vs_MS.Trt_F |
| SDR42E1   | 0.06744 | 0.47605 | 0.471 | 0.38 | 1 | HC_vs_MS.Trt_F |
| PCBP3     | 0.06745 | 0.27502 | 0.506 | 0.44 | 1 | HC_vs_MS.Trt_F |
| FLNA      | 0.06754 | 0.28053 | 0.592 | 0.51 | 1 | HC_vs_MS.Trt_F |
| RAI1      | 0.06768 | 1.20733 | 0.234 | 0.18 | 1 | HC_vs_MS.Trt_F |
| MLEC      | 0.06777 | 0.67061 | 0.15  | 0.1  | 1 | HC_vs_MS.Trt_F |
| MELK      | 0.06797 | -0.6281 | 0.584 | 0.59 | 1 | HC_vs_MS.Trt_F |
| NIT1      | 0.068   | 0.36903 | 0.676 | 0.62 | 1 | HC_vs_MS.Trt_F |
| KCTD11    | 0.06823 | 0.91165 | 0.173 | 0.12 | 1 | HC_vs_MS.Trt_F |
| SLC25A40  | 0.06827 | -0.6514 | 0.364 | 0.28 | 1 | HC_vs_MS.Trt_F |
| STARD6    | 0.06837 | -0.4051 | 0.176 | 0.13 | 1 | HC_vs_MS.Trt_F |
| DAG1      | 0.06841 | 1.49765 | 0.604 | 0.55 | 1 | HC_vs_MS.Trt_F |
| PRRC2B    | 0.06842 | 0.65114 | 0.312 | 0.25 | 1 | HC_vs_MS.Trt_F |
| USO1      | 0.06851 | 0.51055 | 0.208 | 0.15 | 1 | HC_vs_MS.Trt_F |
| ESAM      | 0.06851 | -1.2638 | 0.116 | 0.17 | 1 | HC_vs_MS.Trt_F |
| ZNF226    | 0.06853 | -0.4961 | 0.581 | 0.5  | 1 | HC_vs_MS.Trt_F |
| TBCEL     | 0.06859 | 0.28149 | 0.113 | 0.16 | 1 | HC_vs_MS.Trt_F |
| SUPT20H   | 0.06859 | 0.37655 | 0.491 | 0.41 | 1 | HC_vs_MS.Trt_F |
| CTC1      | 0.06876 | 0.35273 | 0.491 | 0.43 | 1 | HC_vs_MS.Trt_F |
| MYH10     | 0.06897 | 0.75924 | 0.147 | 0.1  | 1 | HC_vs_MS.Trt_F |
| NANOS1    | 0.069   | -0.2819 | 0.535 | 0.57 | 1 | HC_vs_MS.Trt_F |
| ARHGAP11A | 0.06906 | 0.47351 | 0.422 | 0.35 | 1 | HC_vs_MS.Trt_F |
| SUN3      | 0.06907 | 0.36674 | 0.413 | 0.34 | 1 | HC_vs_MS.Trt_F |
| C2CD5     | 0.06918 | -0.5128 | 0.211 | 0.15 | 1 | HC_vs_MS.Trt_F |
| SIRPB2    | 0.06927 | 0.43712 | 0.416 | 0.33 | 1 | HC_vs_MS.Trt_F |
| SPG20     | 0.06931 | 0.42102 | 0.165 | 0.11 | 1 | HC_vs_MS.Trt_F |
| SPHK2     | 0.06935 | 1.19198 | 0.393 | 0.32 | 1 | HC_vs_MS.Trt_F |
| DNAJB9    | 0.06942 | 0.79086 | 0.171 | 0.12 | 1 | HC_vs_MS.Trt_F |

|            |         |         |       |      |   |                |
|------------|---------|---------|-------|------|---|----------------|
| ADRA1A     | 0.06973 | 0.2835  | 0.618 | 0.58 | 1 | HC_vs_MS.Trt_F |
| TNS3       | 0.06978 | 0.65033 | 0.419 | 0.33 | 1 | HC_vs_MS.Trt_F |
| NOL11      | 0.06981 | -0.7517 | 0.578 | 0.48 | 1 | HC_vs_MS.Trt_F |
| THOC2      | 0.06984 | 0.26461 | 0.601 | 0.53 | 1 | HC_vs_MS.Trt_F |
| ADARB2     | 0.06992 | -0.6877 | 0.402 | 0.33 | 1 | HC_vs_MS.Trt_F |
| GANAB      | 0.07    | 1.02252 | 0.503 | 0.45 | 1 | HC_vs_MS.Trt_F |
| AKT3       | 0.07014 | 0.31309 | 0.798 | 0.71 | 1 | HC_vs_MS.Trt_F |
| DCC        | 0.07015 | 0.45464 | 0.116 | 0.17 | 1 | HC_vs_MS.Trt_F |
| MAST3      | 0.0702  | -0.4369 | 0.668 | 0.75 | 1 | HC_vs_MS.Trt_F |
| USP32      | 0.07036 | 0.66393 | 0.332 | 0.28 | 1 | HC_vs_MS.Trt_F |
| ALMS1      | 0.07042 | 1.58684 | 0.517 | 0.45 | 1 | HC_vs_MS.Trt_F |
| FRMD3      | 0.07043 | 0.36254 | 0.124 | 0.08 | 1 | HC_vs_MS.Trt_F |
| RP11-343C2 | 0.07048 | 0.56749 | 0.168 | 0.12 | 1 | HC_vs_MS.Trt_F |
| ABI3BP     | 0.07052 | 0.26482 | 0.5   | 0.41 | 1 | HC_vs_MS.Trt_F |
| PPAT       | 0.07062 | -0.7289 | 0.344 | 0.28 | 1 | HC_vs_MS.Trt_F |
| ACTR3B     | 0.07095 | 0.49241 | 0.592 | 0.5  | 1 | HC_vs_MS.Trt_F |
| TTC14      | 0.07101 | 0.42349 | 0.442 | 0.35 | 1 | HC_vs_MS.Trt_F |
| ARHGAP17   | 0.0715  | 0.48325 | 0.63  | 0.55 | 1 | HC_vs_MS.Trt_F |
| C18orf21   | 0.07151 | 0.71972 | 0.118 | 0.08 | 1 | HC_vs_MS.Trt_F |
| COQ5       | 0.07156 | 0.29085 | 0.876 | 0.82 | 1 | HC_vs_MS.Trt_F |
| BNIP3L     | 0.07162 | -0.3167 | 0.263 | 0.19 | 1 | HC_vs_MS.Trt_F |
| LAIR2      | 0.0719  | 0.34322 | 0.179 | 0.13 | 1 | HC_vs_MS.Trt_F |
| ARL17B     | 0.07204 | -0.561  | 0.78  | 0.71 | 1 | HC_vs_MS.Trt_F |
| MIB1       | 0.07213 | 1.39005 | 0.171 | 0.12 | 1 | HC_vs_MS.Trt_F |
| GNAS       | 0.07216 | -0.5177 | 0.497 | 0.51 | 1 | HC_vs_MS.Trt_F |
| CEP164     | 0.07221 | 0.34768 | 0.208 | 0.15 | 1 | HC_vs_MS.Trt_F |
| AASDH      | 0.07226 | 0.40174 | 0.142 | 0.09 | 1 | HC_vs_MS.Trt_F |
| TNFRSF21   | 0.07228 | 0.98575 | 0.185 | 0.14 | 1 | HC_vs_MS.Trt_F |
| BAP1       | 0.0723  | -0.41   | 0.382 | 0.3  | 1 | HC_vs_MS.Trt_F |
| LZIC       | 0.07244 | 0.40325 | 0.873 | 0.82 | 1 | HC_vs_MS.Trt_F |
| NCR1       | 0.07246 | 0.52106 | 0.266 | 0.21 | 1 | HC_vs_MS.Trt_F |
| NISCH      | 0.07247 | 0.51321 | 0.454 | 0.4  | 1 | HC_vs_MS.Trt_F |
| KLHL3      | 0.07252 | 0.45575 | 0.277 | 0.21 | 1 | HC_vs_MS.Trt_F |
| GPR85      | 0.07264 | 0.28983 | 0.41  | 0.35 | 1 | HC_vs_MS.Trt_F |
| CDC42BPG   | 0.07267 | 0.55495 | 0.616 | 0.54 | 1 | HC_vs_MS.Trt_F |
| ZNF782     | 0.07269 | 1.1148  | 0.147 | 0.1  | 1 | HC_vs_MS.Trt_F |
| GEMIN6     | 0.07272 | -0.2853 | 0.968 | 0.92 | 1 | HC_vs_MS.Trt_F |
| DET1       | 0.07275 | -0.5352 | 0.601 | 0.54 | 1 | HC_vs_MS.Trt_F |
| LRRC8C     | 0.07278 | 0.51809 | 0.335 | 0.28 | 1 | HC_vs_MS.Trt_F |
| TTC28      | 0.07298 | -0.8112 | 0.46  | 0.38 | 1 | HC_vs_MS.Trt_F |

|          |         |         |       |      |   |                |
|----------|---------|---------|-------|------|---|----------------|
| PRKDC    | 0.0732  | 0.33979 | 0.63  | 0.58 | 1 | HC_vs_MS.Trt_F |
| NFAT5    | 0.07329 | 0.79651 | 0.893 | 0.84 | 1 | HC_vs_MS.Trt_F |
| NHLRC3   | 0.07358 | -0.3219 | 0.422 | 0.35 | 1 | HC_vs_MS.Trt_F |
| TTF1     | 0.0736  | 0.58358 | 0.512 | 0.45 | 1 | HC_vs_MS.Trt_F |
| ETHE1    | 0.07362 | 1.0021  | 0.136 | 0.09 | 1 | HC_vs_MS.Trt_F |
| SLAMF7   | 0.07363 | -0.8253 | 0.477 | 0.38 | 1 | HC_vs_MS.Trt_F |
| TXNDC11  | 0.07389 | 0.4168  | 0.39  | 0.32 | 1 | HC_vs_MS.Trt_F |
| FBXW5    | 0.07393 | 0.43623 | 0.257 | 0.19 | 1 | HC_vs_MS.Trt_F |
| EXOC4    | 0.07403 | 0.46403 | 0.575 | 0.49 | 1 | HC_vs_MS.Trt_F |
| LDLR     | 0.07407 | 0.26194 | 0.98  | 0.92 | 1 | HC_vs_MS.Trt_F |
| RNF19B   | 0.07416 | -0.5653 | 0.069 | 0.11 | 1 | HC_vs_MS.Trt_F |
| NBPF9    | 0.07419 | 0.573   | 0.702 | 0.65 | 1 | HC_vs_MS.Trt_F |
| BORCS6   | 0.07439 | 0.50907 | 0.133 | 0.09 | 1 | HC_vs_MS.Trt_F |
| FAM160B2 | 0.07448 | 0.60554 | 0.76  | 0.66 | 1 | HC_vs_MS.Trt_F |
| MGMT     | 0.07453 | 0.59413 | 0.165 | 0.12 | 1 | HC_vs_MS.Trt_F |
| TMEM116  | 0.0746  | 0.29413 | 0.928 | 0.87 | 1 | HC_vs_MS.Trt_F |
| TSC2     | 0.07476 | 0.34623 | 0.731 | 0.66 | 1 | HC_vs_MS.Trt_F |
| ST8SIA6  | 0.07482 | -0.6997 | 0.46  | 0.37 | 1 | HC_vs_MS.Trt_F |
| ARNTL    | 0.07483 | 0.54362 | 0.251 | 0.19 | 1 | HC_vs_MS.Trt_F |
| PIGM     | 0.07485 | 0.27423 | 0.679 | 0.62 | 1 | HC_vs_MS.Trt_F |
| AFF4     | 0.07495 | 0.79025 | 0.532 | 0.48 | 1 | HC_vs_MS.Trt_F |
| PRPF38A  | 0.07503 | -0.7136 | 0.673 | 0.59 | 1 | HC_vs_MS.Trt_F |
| FAM53B   | 0.07525 | 0.61041 | 0.26  | 0.2  | 1 | HC_vs_MS.Trt_F |
| PQLC3    | 0.0753  | 0.449   | 0.191 | 0.13 | 1 | HC_vs_MS.Trt_F |
| PCDHGA6  | 0.0753  | 0.48727 | 0.85  | 0.81 | 1 | HC_vs_MS.Trt_F |
| RB1      | 0.0754  | 0.86532 | 0.179 | 0.13 | 1 | HC_vs_MS.Trt_F |
| SLC25A32 | 0.07545 | -0.5399 | 0.425 | 0.34 | 1 | HC_vs_MS.Trt_F |
| CYP4A11  | 0.07549 | 0.30337 | 0.13  | 0.09 | 1 | HC_vs_MS.Trt_F |
| VPS52    | 0.07563 | 0.29269 | 0.22  | 0.16 | 1 | HC_vs_MS.Trt_F |
| NBPF1    | 0.07579 | 0.30761 | 0.283 | 0.22 | 1 | HC_vs_MS.Trt_F |
| NOP16    | 0.07599 | 0.29194 | 0.228 | 0.17 | 1 | HC_vs_MS.Trt_F |
| IMPA1    | 0.07607 | -0.8289 | 0.422 | 0.34 | 1 | HC_vs_MS.Trt_F |
| RHOG     | 0.0761  | 0.3911  | 0.428 | 0.36 | 1 | HC_vs_MS.Trt_F |
| RPS27    | 0.07621 | 0.27753 | 0.301 | 0.25 | 1 | HC_vs_MS.Trt_F |
| PRPF39   | 0.0764  | -0.3467 | 0.315 | 0.38 | 1 | HC_vs_MS.Trt_F |
| PPM1M    | 0.07644 | 0.3333  | 0.197 | 0.14 | 1 | HC_vs_MS.Trt_F |
| GLTSCR1L | 0.07645 | 0.57613 | 0.231 | 0.17 | 1 | HC_vs_MS.Trt_F |
| ANP32E   | 0.07656 | -1.1298 | 0.462 | 0.48 | 1 | HC_vs_MS.Trt_F |
| DPH1     | 0.07664 | 0.3131  | 0.91  | 0.86 | 1 | HC_vs_MS.Trt_F |
| KLRC1    | 0.07665 | -0.2868 | 0.338 | 0.27 | 1 | HC_vs_MS.Trt_F |

|          |         |         |       |      |   |                |
|----------|---------|---------|-------|------|---|----------------|
| AKAP12   | 0.07673 | 0.68598 | 0.09  | 0.13 | 1 | HC_vs_MS.Trt_F |
| ADA      | 0.07673 | -0.5735 | 0.107 | 0.15 | 1 | HC_vs_MS.Trt_F |
| NRDC     | 0.07683 | 0.27901 | 0.419 | 0.34 | 1 | HC_vs_MS.Trt_F |
| ALAS1    | 0.07698 | 0.63214 | 0.159 | 0.11 | 1 | HC_vs_MS.Trt_F |
| ABCB6    | 0.07702 | 0.26188 | 0.194 | 0.14 | 1 | HC_vs_MS.Trt_F |
| FKBP4    | 0.07732 | 0.35455 | 0.159 | 0.11 | 1 | HC_vs_MS.Trt_F |
| NFIB     | 0.07759 | -0.4493 | 0.191 | 0.14 | 1 | HC_vs_MS.Trt_F |
| CUL7     | 0.07806 | 0.88369 | 0.121 | 0.08 | 1 | HC_vs_MS.Trt_F |
| MAK      | 0.0781  | 0.27223 | 0.249 | 0.19 | 1 | HC_vs_MS.Trt_F |
| WDR43    | 0.07811 | -0.2659 | 0.318 | 0.38 | 1 | HC_vs_MS.Trt_F |
| CEP162   | 0.07811 | -0.5206 | 0.217 | 0.16 | 1 | HC_vs_MS.Trt_F |
| PORCN    | 0.07816 | 1.18292 | 0.121 | 0.08 | 1 | HC_vs_MS.Trt_F |
| TMEM135  | 0.07832 | 0.27892 | 0.803 | 0.76 | 1 | HC_vs_MS.Trt_F |
| CHSY1    | 0.07833 | -0.3384 | 0.324 | 0.26 | 1 | HC_vs_MS.Trt_F |
| NAA30    | 0.07837 | 0.42827 | 0.54  | 0.46 | 1 | HC_vs_MS.Trt_F |
| SVBP     | 0.07843 | -0.8273 | 0.121 | 0.17 | 1 | HC_vs_MS.Trt_F |
| ACACB    | 0.07845 | 0.29583 | 0.96  | 0.92 | 1 | HC_vs_MS.Trt_F |
| KLHL7    | 0.07879 | -0.3569 | 0.798 | 0.69 | 1 | HC_vs_MS.Trt_F |
| API5     | 0.07884 | -0.7962 | 0.327 | 0.23 | 1 | HC_vs_MS.Trt_F |
| SRPRB    | 0.07901 | 0.3048  | 0.208 | 0.15 | 1 | HC_vs_MS.Trt_F |
| ADAL     | 0.07947 | 0.73763 | 0.506 | 0.42 | 1 | HC_vs_MS.Trt_F |
| CXorf36  | 0.0796  | 0.5439  | 0.474 | 0.43 | 1 | HC_vs_MS.Trt_F |
| SOCS4    | 0.07979 | 1.14881 | 0.379 | 0.3  | 1 | HC_vs_MS.Trt_F |
| TMEM65   | 0.07982 | 0.48273 | 0.777 | 0.71 | 1 | HC_vs_MS.Trt_F |
| LTN1     | 0.07984 | 0.73266 | 0.197 | 0.14 | 1 | HC_vs_MS.Trt_F |
| UBR3     | 0.07991 | -0.4671 | 0.171 | 0.12 | 1 | HC_vs_MS.Trt_F |
| SH3PXD2A | 0.07994 | 0.39369 | 0.379 | 0.31 | 1 | HC_vs_MS.Trt_F |
| MMS19    | 0.07998 | 0.34976 | 0.225 | 0.17 | 1 | HC_vs_MS.Trt_F |
| HEMGN    | 0.08019 | 0.49241 | 0.15  | 0.1  | 1 | HC_vs_MS.Trt_F |
| AIM2     | 0.08022 | 1.3939  | 0.341 | 0.28 | 1 | HC_vs_MS.Trt_F |
| SLC25A13 | 0.08033 | 0.57598 | 0.165 | 0.12 | 1 | HC_vs_MS.Trt_F |
| PAN3     | 0.08044 | -0.624  | 0.824 | 0.86 | 1 | HC_vs_MS.Trt_F |
| PKN2     | 0.08061 | 0.37923 | 0.379 | 0.31 | 1 | HC_vs_MS.Trt_F |
| PLAGL2   | 0.08092 | 1.16656 | 0.107 | 0.07 | 1 | HC_vs_MS.Trt_F |
| FAM206A  | 0.081   | 1.69391 | 0.124 | 0.08 | 1 | HC_vs_MS.Trt_F |
| BCL9     | 0.08106 | 0.26218 | 0.136 | 0.09 | 1 | HC_vs_MS.Trt_F |
| MOG      | 0.08115 | 0.41396 | 0.396 | 0.32 | 1 | HC_vs_MS.Trt_F |
| FBXL12   | 0.08125 | -0.3181 | 0.723 | 0.64 | 1 | HC_vs_MS.Trt_F |
| 9-Mar    | 0.08128 | 0.94245 | 0.662 | 0.59 | 1 | HC_vs_MS.Trt_F |
| ERI2     | 0.08164 | 1.11866 | 0.197 | 0.15 | 1 | HC_vs_MS.Trt_F |

|          |         |         |       |      |   |                |
|----------|---------|---------|-------|------|---|----------------|
| ANAPC2   | 0.08172 | 1.65081 | 0.124 | 0.08 | 1 | HC_vs_MS.Trt_F |
| BHLHB9   | 0.08183 | -0.7745 | 0.436 | 0.35 | 1 | HC_vs_MS.Trt_F |
| SPG11    | 0.08186 | 0.26082 | 0.853 | 0.82 | 1 | HC_vs_MS.Trt_F |
| JAML     | 0.08211 | 0.43911 | 0.306 | 0.24 | 1 | HC_vs_MS.Trt_F |
| PEA15    | 0.08224 | -0.2912 | 0.194 | 0.13 | 1 | HC_vs_MS.Trt_F |
| TNRC6A   | 0.08231 | 0.3964  | 0.887 | 0.84 | 1 | HC_vs_MS.Trt_F |
| ITGA6    | 0.08236 | 0.26028 | 0.199 | 0.14 | 1 | HC_vs_MS.Trt_F |
| MESDC2   | 0.0824  | -0.7998 | 0.613 | 0.5  | 1 | HC_vs_MS.Trt_F |
| ICMT     | 0.08245 | 0.43759 | 0.74  | 0.65 | 1 | HC_vs_MS.Trt_F |
| CRYGS    | 0.08276 | 1.0548  | 0.286 | 0.22 | 1 | HC_vs_MS.Trt_F |
| RAPGEF2  | 0.08294 | 0.63008 | 0.445 | 0.37 | 1 | HC_vs_MS.Trt_F |
| RRP36    | 0.08312 | 0.33451 | 0.514 | 0.44 | 1 | HC_vs_MS.Trt_F |
| ZNF606   | 0.08327 | 0.2757  | 0.815 | 0.81 | 1 | HC_vs_MS.Trt_F |
| SLFN13   | 0.0833  | -0.6025 | 0.731 | 0.63 | 1 | HC_vs_MS.Trt_F |
| FAM160B1 | 0.08332 | 0.75256 | 0.205 | 0.15 | 1 | HC_vs_MS.Trt_F |
| ZNF800   | 0.08345 | 0.73696 | 0.251 | 0.19 | 1 | HC_vs_MS.Trt_F |
| GZMM     | 0.08351 | 0.27452 | 0.199 | 0.14 | 1 | HC_vs_MS.Trt_F |
| CSAD     | 0.08353 | 0.46932 | 0.858 | 0.79 | 1 | HC_vs_MS.Trt_F |
| IL4R     | 0.08361 | 1.11577 | 0.506 | 0.48 | 1 | HC_vs_MS.Trt_F |
| HOOK1    | 0.08379 | -0.5891 | 0.078 | 0.12 | 1 | HC_vs_MS.Trt_F |
| MFSD4B   | 0.08392 | 0.35293 | 0.766 | 0.71 | 1 | HC_vs_MS.Trt_F |
| CLASRP   | 0.08393 | 0.8257  | 0.202 | 0.15 | 1 | HC_vs_MS.Trt_F |
| NRROS    | 0.08394 | 0.95165 | 0.173 | 0.13 | 1 | HC_vs_MS.Trt_F |
| SRSF11   | 0.08396 | -0.3583 | 0.803 | 0.72 | 1 | HC_vs_MS.Trt_F |
| TBCB     | 0.08423 | -0.2754 | 0.714 | 0.74 | 1 | HC_vs_MS.Trt_F |
| AKAP1    | 0.08433 | 0.46642 | 0.15  | 0.1  | 1 | HC_vs_MS.Trt_F |
| PCED1B   | 0.08452 | 0.4249  | 0.509 | 0.43 | 1 | HC_vs_MS.Trt_F |
| EIF3B    | 0.0846  | -0.2753 | 0.422 | 0.35 | 1 | HC_vs_MS.Trt_F |
| SLC39A11 | 0.08475 | -0.6953 | 0.272 | 0.32 | 1 | HC_vs_MS.Trt_F |
| SKIV2L2  | 0.08496 | 0.30216 | 0.887 | 0.82 | 1 | HC_vs_MS.Trt_F |
| RAC1     | 0.08509 | -0.376  | 0.182 | 0.23 | 1 | HC_vs_MS.Trt_F |
| YPEL1    | 0.08514 | -1.2863 | 0.529 | 0.45 | 1 | HC_vs_MS.Trt_F |
| SLC2A8   | 0.08515 | 0.25065 | 0.327 | 0.27 | 1 | HC_vs_MS.Trt_F |
| LARS     | 0.08527 | -0.6033 | 0.737 | 0.69 | 1 | HC_vs_MS.Trt_F |
| RIOK1    | 0.08528 | 0.29707 | 0.136 | 0.09 | 1 | HC_vs_MS.Trt_F |
| TRAPPC11 | 0.08529 | 0.75228 | 0.474 | 0.41 | 1 | HC_vs_MS.Trt_F |
| KLHL5    | 0.0855  | -0.3658 | 0.512 | 0.43 | 1 | HC_vs_MS.Trt_F |
| MIGA2    | 0.08552 | 0.9208  | 0.514 | 0.42 | 1 | HC_vs_MS.Trt_F |
| MAL      | 0.08563 | 0.38241 | 0.237 | 0.18 | 1 | HC_vs_MS.Trt_F |
| SELENBP1 | 0.0858  | -1.0969 | 0.335 | 0.27 | 1 | HC_vs_MS.Trt_F |

|          |         |         |       |      |   |                |
|----------|---------|---------|-------|------|---|----------------|
| GVQW1    | 0.08596 | -0.42   | 0.48  | 0.53 | 1 | HC_vs_MS.Trt_F |
| LARP4    | 0.08597 | 0.59818 | 0.408 | 0.35 | 1 | HC_vs_MS.Trt_F |
| UXT      | 0.08632 | 0.25679 | 0.246 | 0.19 | 1 | HC_vs_MS.Trt_F |
| LCP1     | 0.08647 | -0.3732 | 0.621 | 0.63 | 1 | HC_vs_MS.Trt_F |
| ARL1     | 0.08651 | -0.8357 | 0.419 | 0.33 | 1 | HC_vs_MS.Trt_F |
| MRPL28   | 0.08657 | 0.76095 | 0.15  | 0.1  | 1 | HC_vs_MS.Trt_F |
| ITM2B    | 0.0866  | -0.3879 | 0.584 | 0.6  | 1 | HC_vs_MS.Trt_F |
| ING1     | 0.08686 | -0.5417 | 0.656 | 0.6  | 1 | HC_vs_MS.Trt_F |
| LY6G5C   | 0.08693 | 0.29445 | 0.613 | 0.55 | 1 | HC_vs_MS.Trt_F |
| ZNF583   | 0.08694 | -0.2776 | 0.882 | 0.78 | 1 | HC_vs_MS.Trt_F |
| TMEM261  | 0.08694 | -0.79   | 0.165 | 0.12 | 1 | HC_vs_MS.Trt_F |
| GOLPH3L  | 0.08733 | 1.03223 | 0.263 | 0.2  | 1 | HC_vs_MS.Trt_F |
| AGPAT4   | 0.08751 | 0.48168 | 0.142 | 0.1  | 1 | HC_vs_MS.Trt_F |
| IRGQ     | 0.08754 | 0.73666 | 0.991 | 0.98 | 1 | HC_vs_MS.Trt_F |
| ANKRD37  | 0.0876  | 1.03197 | 0.15  | 0.1  | 1 | HC_vs_MS.Trt_F |
| PGM5     | 0.08764 | 0.30153 | 0.104 | 0.07 | 1 | HC_vs_MS.Trt_F |
| ST6GAL1  | 0.08771 | 0.29125 | 0.434 | 0.37 | 1 | HC_vs_MS.Trt_F |
| VPS28    | 0.08772 | 0.31991 | 0.592 | 0.51 | 1 | HC_vs_MS.Trt_F |
| SUMF2    | 0.08787 | -0.3144 | 0.902 | 0.87 | 1 | HC_vs_MS.Trt_F |
| NUMBL    | 0.08803 | 0.5502  | 0.627 | 0.55 | 1 | HC_vs_MS.Trt_F |
| PICK1    | 0.08823 | 1.12564 | 0.52  | 0.46 | 1 | HC_vs_MS.Trt_F |
| TSNARE1  | 0.08824 | 1.09535 | 0.133 | 0.09 | 1 | HC_vs_MS.Trt_F |
| MAT2A    | 0.08828 | 0.38553 | 0.208 | 0.15 | 1 | HC_vs_MS.Trt_F |
| SEMA4F   | 0.0883  | 0.52567 | 0.592 | 0.52 | 1 | HC_vs_MS.Trt_F |
| PSTK     | 0.0884  | -0.3397 | 0.416 | 0.35 | 1 | HC_vs_MS.Trt_F |
| ZNF197   | 0.0884  | -0.3882 | 0.538 | 0.47 | 1 | HC_vs_MS.Trt_F |
| RNF165   | 0.08852 | 0.55988 | 0.54  | 0.46 | 1 | HC_vs_MS.Trt_F |
| KIAA0040 | 0.08854 | 0.54007 | 0.211 | 0.16 | 1 | HC_vs_MS.Trt_F |
| ZNF32    | 0.08855 | 1.59352 | 0.107 | 0.07 | 1 | HC_vs_MS.Trt_F |
| ANKEF1   | 0.08861 | -1.1013 | 0.269 | 0.2  | 1 | HC_vs_MS.Trt_F |
| MCM3AP   | 0.08862 | 0.41532 | 0.546 | 0.45 | 1 | HC_vs_MS.Trt_F |
| COQ4     | 0.08887 | 0.39044 | 0.922 | 0.87 | 1 | HC_vs_MS.Trt_F |
| FARS2    | 0.08898 | 1.3701  | 0.127 | 0.09 | 1 | HC_vs_MS.Trt_F |
| 2-Mar    | 0.08905 | -0.3399 | 0.636 | 0.56 | 1 | HC_vs_MS.Trt_F |
| TEFM     | 0.08905 | 0.29927 | 0.763 | 0.7  | 1 | HC_vs_MS.Trt_F |
| MAP3K2   | 0.08927 | 0.5621  | 0.301 | 0.24 | 1 | HC_vs_MS.Trt_F |
| ANKUB1   | 0.08941 | 0.28703 | 0.491 | 0.41 | 1 | HC_vs_MS.Trt_F |
| ALDH8A1  | 0.08973 | 0.42743 | 0.59  | 0.53 | 1 | HC_vs_MS.Trt_F |
| CHCHD5   | 0.08975 | 0.79813 | 0.532 | 0.45 | 1 | HC_vs_MS.Trt_F |
| DFFB     | 0.0898  | -0.4311 | 0.882 | 0.83 | 1 | HC_vs_MS.Trt_F |

|            |         |         |       |      |   |                |
|------------|---------|---------|-------|------|---|----------------|
| TXLNG      | 0.08985 | 0.3483  | 0.139 | 0.09 | 1 | HC_vs_MS.Trt_F |
| TRIM45     | 0.08992 | 0.92203 | 0.156 | 0.11 | 1 | HC_vs_MS.Trt_F |
| MMAB       | 0.08993 | 0.33807 | 0.717 | 0.64 | 1 | HC_vs_MS.Trt_F |
| RNF24      | 0.08994 | 0.6328  | 0.581 | 0.53 | 1 | HC_vs_MS.Trt_F |
| ZADH2      | 0.09026 | -1.0501 | 0.861 | 0.82 | 1 | HC_vs_MS.Trt_F |
| CAPNS1     | 0.09036 | -0.2724 | 0.37  | 0.29 | 1 | HC_vs_MS.Trt_F |
| ANO9       | 0.09037 | 0.38585 | 0.289 | 0.23 | 1 | HC_vs_MS.Trt_F |
| TRIB2      | 0.09079 | -0.8881 | 0.367 | 0.39 | 1 | HC_vs_MS.Trt_F |
| ZNF28      | 0.09081 | -0.8195 | 0.829 | 0.78 | 1 | HC_vs_MS.Trt_F |
| IFI6       | 0.09099 | -0.4817 | 0.341 | 0.37 | 1 | HC_vs_MS.Trt_F |
| FANCG      | 0.09099 | -0.8413 | 0.156 | 0.1  | 1 | HC_vs_MS.Trt_F |
| KDM5B      | 0.09104 | 0.25436 | 0.327 | 0.37 | 1 | HC_vs_MS.Trt_F |
| TSPOAP1    | 0.09145 | 0.7149  | 0.321 | 0.26 | 1 | HC_vs_MS.Trt_F |
| AMT        | 0.09149 | -0.7182 | 0.497 | 0.42 | 1 | HC_vs_MS.Trt_F |
| IPO9       | 0.09156 | -0.977  | 0.876 | 0.8  | 1 | HC_vs_MS.Trt_F |
| NFRKB      | 0.09162 | 0.29811 | 0.185 | 0.13 | 1 | HC_vs_MS.Trt_F |
| WFDC11     | 0.09191 | 0.41414 | 0.289 | 0.23 | 1 | HC_vs_MS.Trt_F |
| WDR90      | 0.09204 | -0.4528 | 0.916 | 0.88 | 1 | HC_vs_MS.Trt_F |
| KAT14      | 0.0921  | -1.1246 | 0.072 | 0.11 | 1 | HC_vs_MS.Trt_F |
| LRRC14     | 0.09223 | 0.65681 | 0.121 | 0.08 | 1 | HC_vs_MS.Trt_F |
| CCT6B      | 0.09253 | 0.65419 | 0.312 | 0.25 | 1 | HC_vs_MS.Trt_F |
| TMEM129    | 0.09269 | 0.44104 | 0.107 | 0.07 | 1 | HC_vs_MS.Trt_F |
| NIT2       | 0.09274 | 0.38974 | 0.676 | 0.58 | 1 | HC_vs_MS.Trt_F |
| CMTR1      | 0.09276 | 0.98664 | 0.208 | 0.16 | 1 | HC_vs_MS.Trt_F |
| MTO1       | 0.09303 | -0.2697 | 0.988 | 0.98 | 1 | HC_vs_MS.Trt_F |
| WBSCR22    | 0.09313 | 0.25873 | 0.789 | 0.75 | 1 | HC_vs_MS.Trt_F |
| MOB2       | 0.09335 | -0.5953 | 0.101 | 0.14 | 1 | HC_vs_MS.Trt_F |
| CSRNP2     | 0.09355 | -0.2999 | 0.139 | 0.09 | 1 | HC_vs_MS.Trt_F |
| NUP205     | 0.09367 | 0.86986 | 0.202 | 0.15 | 1 | HC_vs_MS.Trt_F |
| LIN54      | 0.09369 | -0.3917 | 0.653 | 0.57 | 1 | HC_vs_MS.Trt_F |
| TADA2A     | 0.09374 | -0.3022 | 0.919 | 0.91 | 1 | HC_vs_MS.Trt_F |
| RAB26      | 0.09379 | 0.5126  | 0.179 | 0.13 | 1 | HC_vs_MS.Trt_F |
| SPINK9     | 0.09389 | 0.5936  | 0.688 | 0.59 | 1 | HC_vs_MS.Trt_F |
| TMX2       | 0.09423 | 0.28651 | 0.165 | 0.12 | 1 | HC_vs_MS.Trt_F |
| IQCK       | 0.09546 | -0.3929 | 0.231 | 0.18 | 1 | HC_vs_MS.Trt_F |
| GGT1       | 0.09555 | 1.27037 | 0.156 | 0.11 | 1 | HC_vs_MS.Trt_F |
| RP11-111M1 | 0.09563 | 0.26353 | 0.908 | 0.86 | 1 | HC_vs_MS.Trt_F |
| ZNF7       | 0.09573 | 0.47207 | 0.934 | 0.95 | 1 | HC_vs_MS.Trt_F |
| RCOR1      | 0.0959  | 0.55957 | 0.225 | 0.17 | 1 | HC_vs_MS.Trt_F |
| MAP2K3     | 0.09593 | 0.55873 | 0.194 | 0.14 | 1 | HC_vs_MS.Trt_F |



|          |         |         |       |      |   |                |
|----------|---------|---------|-------|------|---|----------------|
| LAMP1    | 0.09597 | 1.22074 | 0.41  | 0.35 | 1 | HC_vs_MS.Trt_F |
| AGTRAP   | 0.09618 | 0.31396 | 0.179 | 0.13 | 1 | HC_vs_MS.Trt_F |
| EFL1     | 0.09622 | -0.9544 | 0.11  | 0.15 | 1 | HC_vs_MS.Trt_F |
| ANKRD10  | 0.09627 | -0.407  | 0.717 | 0.73 | 1 | HC_vs_MS.Trt_F |
| FCRL1    | 0.09634 | 0.73954 | 0.318 | 0.26 | 1 | HC_vs_MS.Trt_F |
| TTC9C    | 0.09641 | 0.25825 | 0.387 | 0.31 | 1 | HC_vs_MS.Trt_F |
| ZNF43    | 0.09655 | -0.7394 | 0.772 | 0.77 | 1 | HC_vs_MS.Trt_F |
| AQP3     | 0.09685 | 0.27351 | 0.332 | 0.27 | 1 | HC_vs_MS.Trt_F |
| LSM6     | 0.09719 | 0.399   | 0.162 | 0.12 | 1 | HC_vs_MS.Trt_F |
| MRPS11   | 0.09743 | 0.55221 | 0.751 | 0.7  | 1 | HC_vs_MS.Trt_F |
| EPT1     | 0.09747 | 0.56864 | 0.431 | 0.36 | 1 | HC_vs_MS.Trt_F |
| GRAMD1A  | 0.0975  | -0.4063 | 0.699 | 0.65 | 1 | HC_vs_MS.Trt_F |
| KCNRG    | 0.09755 | 0.45455 | 0.425 | 0.35 | 1 | HC_vs_MS.Trt_F |
| RBFA     | 0.09757 | 0.54418 | 0.364 | 0.3  | 1 | HC_vs_MS.Trt_F |
| NUDT22   | 0.0976  | -1.2245 | 0.676 | 0.72 | 1 | HC_vs_MS.Trt_F |
| MREG     | 0.09761 | 0.49181 | 0.668 | 0.6  | 1 | HC_vs_MS.Trt_F |
| CD226    | 0.09771 | 0.67313 | 0.595 | 0.52 | 1 | HC_vs_MS.Trt_F |
| ZNF609   | 0.09773 | 0.43014 | 0.621 | 0.57 | 1 | HC_vs_MS.Trt_F |
| SGK3     | 0.09791 | 0.44911 | 0.951 | 0.87 | 1 | HC_vs_MS.Trt_F |
| GTPBP2   | 0.09808 | -0.5094 | 0.572 | 0.63 | 1 | HC_vs_MS.Trt_F |
| PCGF3    | 0.09824 | 0.27647 | 0.228 | 0.17 | 1 | HC_vs_MS.Trt_F |
| SACS     | 0.09845 | 0.66826 | 0.153 | 0.11 | 1 | HC_vs_MS.Trt_F |
| NONO     | 0.09847 | 0.28698 | 0.705 | 0.64 | 1 | HC_vs_MS.Trt_F |
| MED25    | 0.09882 | 0.46385 | 0.52  | 0.47 | 1 | HC_vs_MS.Trt_F |
| TBC1D19  | 0.09885 | 0.37965 | 0.153 | 0.11 | 1 | HC_vs_MS.Trt_F |
| KDELC2   | 0.09892 | -0.4761 | 0.65  | 0.59 | 1 | HC_vs_MS.Trt_F |
| MAN2A2   | 0.099   | 0.27137 | 0.364 | 0.31 | 1 | HC_vs_MS.Trt_F |
| SNED1    | 0.09906 | 0.56016 | 0.197 | 0.14 | 1 | HC_vs_MS.Trt_F |
| PRKCZ    | 0.09909 | 0.74539 | 0.301 | 0.24 | 1 | HC_vs_MS.Trt_F |
| SORBS2   | 0.09911 | 0.29738 | 0.665 | 0.6  | 1 | HC_vs_MS.Trt_F |
| EHMT2    | 0.09923 | 0.45047 | 0.699 | 0.6  | 1 | HC_vs_MS.Trt_F |
| PGGHG    | 0.09953 | 0.86391 | 0.176 | 0.13 | 1 | HC_vs_MS.Trt_F |
| PSD3     | 0.0996  | 0.5139  | 0.373 | 0.31 | 1 | HC_vs_MS.Trt_F |
| SRBD1    | 0.09964 | -1.8069 | 0.46  | 0.36 | 1 | HC_vs_MS.Trt_F |
| SF3B5    | 0.0997  | 0.80942 | 0.142 | 0.1  | 1 | HC_vs_MS.Trt_F |
| FGD4     | 0.09971 | 0.84166 | 0.861 | 0.76 | 1 | HC_vs_MS.Trt_F |
| RAD51    | 0.09976 | -0.5076 | 0.512 | 0.46 | 1 | HC_vs_MS.Trt_F |
| SLC25A36 | 0.09998 | 0.51226 | 0.176 | 0.13 | 1 | HC_vs_MS.Trt_F |
| PEX13    | 0.10005 | -1.0184 | 0.783 | 0.8  | 1 | HC_vs_MS.Trt_F |
| VPS8     | 0.10021 | -0.5586 | 0.691 | 0.6  | 1 | HC_vs_MS.Trt_F |

|          |         |         |       |      |   |                |
|----------|---------|---------|-------|------|---|----------------|
| ZNF225   | 0.10029 | 0.27653 | 0.855 | 0.75 | 1 | HC_vs_MS.Trt_F |
| PEBP1    | 0.10034 | 0.27375 | 0.434 | 0.39 | 1 | HC_vs_MS.Trt_F |
| COPS7A   | 0.10039 | 0.79122 | 0.286 | 0.23 | 1 | HC_vs_MS.Trt_F |
| CPNE1    | 0.1007  | -0.5824 | 0.523 | 0.52 | 1 | HC_vs_MS.Trt_F |
| SPTLC1   | 0.10089 | -0.2598 | 0.763 | 0.69 | 1 | HC_vs_MS.Trt_F |
| ARL5B    | 0.10095 | 1.25745 | 0.153 | 0.11 | 1 | HC_vs_MS.Trt_F |
| AEBP2    | 0.10116 | -0.9181 | 0.754 | 0.69 | 1 | HC_vs_MS.Trt_F |
| FBXO11   | 0.10137 | 0.30463 | 0.526 | 0.45 | 1 | HC_vs_MS.Trt_F |
| IL17RA   | 0.1015  | 0.3223  | 0.72  | 0.66 | 1 | HC_vs_MS.Trt_F |
| LRPAP1   | 0.10154 | -0.4557 | 0.887 | 0.84 | 1 | HC_vs_MS.Trt_F |
| PNPLA8   | 0.10156 | 0.46718 | 0.468 | 0.4  | 1 | HC_vs_MS.Trt_F |
| MCF2L    | 0.1016  | 1.10453 | 0.37  | 0.3  | 1 | HC_vs_MS.Trt_F |
| ZNF84    | 0.10168 | -0.7633 | 0.312 | 0.25 | 1 | HC_vs_MS.Trt_F |
| GABBR1   | 0.10176 | 0.6812  | 0.208 | 0.16 | 1 | HC_vs_MS.Trt_F |
| TMEM167B | 0.10194 | 0.64411 | 0.792 | 0.77 | 1 | HC_vs_MS.Trt_F |
| PPP1R1C  | 0.10214 | 0.34354 | 0.286 | 0.23 | 1 | HC_vs_MS.Trt_F |
| FANCI    | 0.10218 | -0.3035 | 0.538 | 0.61 | 1 | HC_vs_MS.Trt_F |
| POLR2L   | 0.10222 | 0.31411 | 0.321 | 0.26 | 1 | HC_vs_MS.Trt_F |
| CCDC94   | 0.10229 | 0.69393 | 0.194 | 0.14 | 1 | HC_vs_MS.Trt_F |
| SIKE1    | 0.10232 | -0.4246 | 0.523 | 0.45 | 1 | HC_vs_MS.Trt_F |
| GID8     | 0.10234 | 0.34128 | 0.191 | 0.14 | 1 | HC_vs_MS.Trt_F |
| FN1      | 0.10252 | -0.4803 | 0.5   | 0.4  | 1 | HC_vs_MS.Trt_F |
| TRAK1    | 0.10256 | 0.68043 | 0.136 | 0.09 | 1 | HC_vs_MS.Trt_F |
| TMSB15B  | 0.1026  | 0.63365 | 0.361 | 0.3  | 1 | HC_vs_MS.Trt_F |
| SRSF8    | 0.10274 | -0.7997 | 0.671 | 0.69 | 1 | HC_vs_MS.Trt_F |
| ZNF528   | 0.10289 | 0.58421 | 0.65  | 0.58 | 1 | HC_vs_MS.Trt_F |
| PPRC1    | 0.10292 | 0.47363 | 0.165 | 0.12 | 1 | HC_vs_MS.Trt_F |
| OAZ1     | 0.10301 | -0.299  | 0.803 | 0.78 | 1 | HC_vs_MS.Trt_F |
| C12orf40 | 0.10314 | 0.63973 | 0.298 | 0.24 | 1 | HC_vs_MS.Trt_F |
| FAM117B  | 0.10354 | 0.42253 | 0.474 | 0.41 | 1 | HC_vs_MS.Trt_F |
| BAG4     | 0.1037  | -0.4847 | 0.223 | 0.17 | 1 | HC_vs_MS.Trt_F |
| CCND2    | 0.10378 | -0.6634 | 0.465 | 0.52 | 1 | HC_vs_MS.Trt_F |
| FAM53C   | 0.10394 | 0.64254 | 0.841 | 0.79 | 1 | HC_vs_MS.Trt_F |
| RNF170   | 0.10404 | 0.34778 | 0.642 | 0.55 | 1 | HC_vs_MS.Trt_F |
| CIR1     | 0.10404 | 0.31812 | 0.746 | 0.71 | 1 | HC_vs_MS.Trt_F |
| VPS37A   | 0.10407 | 0.97184 | 0.191 | 0.14 | 1 | HC_vs_MS.Trt_F |
| SLC35B4  | 0.10465 | 0.61563 | 0.587 | 0.53 | 1 | HC_vs_MS.Trt_F |
| KIAA1468 | 0.10465 | 0.34468 | 0.361 | 0.3  | 1 | HC_vs_MS.Trt_F |
| KRTCAP2  | 0.10466 | -0.262  | 0.832 | 0.78 | 1 | HC_vs_MS.Trt_F |
| EEFSEC   | 0.10497 | 1.13744 | 0.13  | 0.09 | 1 | HC_vs_MS.Trt_F |

|          |         |         |       |      |   |                |
|----------|---------|---------|-------|------|---|----------------|
| EMCN     | 0.10511 | 0.77811 | 0.509 | 0.45 | 1 | HC_vs_MS.Trt_F |
| P2RY8    | 0.10514 | 0.36496 | 0.434 | 0.37 | 1 | HC_vs_MS.Trt_F |
| EZH2     | 0.10516 | 0.36975 | 0.185 | 0.13 | 1 | HC_vs_MS.Trt_F |
| SNAP47   | 0.10519 | 0.36723 | 0.171 | 0.12 | 1 | HC_vs_MS.Trt_F |
| 8-Mar    | 0.10521 | 0.55345 | 0.413 | 0.34 | 1 | HC_vs_MS.Trt_F |
| MYO1C    | 0.10532 | -0.9374 | 0.269 | 0.2  | 1 | HC_vs_MS.Trt_F |
| HBG2     | 0.10538 | 0.31347 | 0.454 | 0.41 | 1 | HC_vs_MS.Trt_F |
| HEXA     | 0.10544 | -0.4353 | 0.818 | 0.7  | 1 | HC_vs_MS.Trt_F |
| EMILIN2  | 0.10577 | -0.4958 | 0.48  | 0.42 | 1 | HC_vs_MS.Trt_F |
| PATL2    | 0.10671 | 0.38518 | 0.431 | 0.35 | 1 | HC_vs_MS.Trt_F |
| ABL2     | 0.10674 | 0.62105 | 0.803 | 0.73 | 1 | HC_vs_MS.Trt_F |
| NDUFB2   | 0.1068  | -0.4344 | 0.939 | 0.93 | 1 | HC_vs_MS.Trt_F |
| ORAI3    | 0.10696 | -1.0407 | 0.098 | 0.14 | 1 | HC_vs_MS.Trt_F |
| PEF1     | 0.10718 | 0.31768 | 0.211 | 0.16 | 1 | HC_vs_MS.Trt_F |
| FUK      | 0.10721 | -0.551  | 0.616 | 0.53 | 1 | HC_vs_MS.Trt_F |
| ACSS3    | 0.1073  | 0.36232 | 0.298 | 0.25 | 1 | HC_vs_MS.Trt_F |
| DUS4L    | 0.10755 | -0.6787 | 0.087 | 0.12 | 1 | HC_vs_MS.Trt_F |
| MCRS1    | 0.1079  | 0.31907 | 0.217 | 0.16 | 1 | HC_vs_MS.Trt_F |
| FAR2     | 0.10808 | 0.30403 | 0.237 | 0.19 | 1 | HC_vs_MS.Trt_F |
| RPTOR    | 0.10816 | 0.29433 | 0.393 | 0.34 | 1 | HC_vs_MS.Trt_F |
| MROH1    | 0.10868 | 0.4937  | 0.604 | 0.55 | 1 | HC_vs_MS.Trt_F |
| MIEF2    | 0.10871 | 0.80042 | 0.54  | 0.46 | 1 | HC_vs_MS.Trt_F |
| CRLF2    | 0.10885 | 1.27766 | 0.37  | 0.3  | 1 | HC_vs_MS.Trt_F |
| SPIDR    | 0.10912 | 0.57743 | 0.361 | 0.31 | 1 | HC_vs_MS.Trt_F |
| FOXO3    | 0.10936 | -0.7839 | 0.396 | 0.42 | 1 | HC_vs_MS.Trt_F |
| DRG2     | 0.10937 | 0.635   | 0.234 | 0.18 | 1 | HC_vs_MS.Trt_F |
| ERO1B    | 0.10949 | 0.75407 | 0.133 | 0.09 | 1 | HC_vs_MS.Trt_F |
| RBBP8    | 0.1097  | 0.36471 | 0.142 | 0.1  | 1 | HC_vs_MS.Trt_F |
| CDAN1    | 0.10975 | 0.65952 | 0.529 | 0.55 | 1 | HC_vs_MS.Trt_F |
| PPP1R12B | 0.10991 | 1.12762 | 0.803 | 0.72 | 1 | HC_vs_MS.Trt_F |
| ZC3H7B   | 0.11007 | 0.86285 | 0.853 | 0.77 | 1 | HC_vs_MS.Trt_F |
| PSMD13   | 0.1101  | -0.4017 | 0.54  | 0.6  | 1 | HC_vs_MS.Trt_F |
| ZNF324   | 0.11013 | -0.6356 | 0.066 | 0.1  | 1 | HC_vs_MS.Trt_F |
| MDH2     | 0.11014 | -0.306  | 0.269 | 0.2  | 1 | HC_vs_MS.Trt_F |
| HEATR6   | 0.11028 | 0.34062 | 0.607 | 0.53 | 1 | HC_vs_MS.Trt_F |
| ZAP70    | 0.11059 | 0.31161 | 0.494 | 0.44 | 1 | HC_vs_MS.Trt_F |
| SMARCA2  | 0.11069 | 0.45769 | 0.477 | 0.41 | 1 | HC_vs_MS.Trt_F |
| LANCL2   | 0.11074 | 0.2918  | 0.185 | 0.14 | 1 | HC_vs_MS.Trt_F |
| NVL      | 0.11097 | -0.6615 | 0.835 | 0.74 | 1 | HC_vs_MS.Trt_F |
| PPP2R5E  | 0.11111 | 0.36845 | 0.269 | 0.21 | 1 | HC_vs_MS.Trt_F |

|          |         |         |       |      |   |                |
|----------|---------|---------|-------|------|---|----------------|
| JMJD6    | 0.11148 | 0.50117 | 0.494 | 0.42 | 1 | HC_vs_MS.Trt_F |
| SNX13    | 0.11149 | 0.55527 | 0.324 | 0.26 | 1 | HC_vs_MS.Trt_F |
| NET1     | 0.11157 | 0.39628 | 0.147 | 0.1  | 1 | HC_vs_MS.Trt_F |
| SLC8B1   | 0.11168 | 0.31097 | 0.538 | 0.45 | 1 | HC_vs_MS.Trt_F |
| C6orf106 | 0.11117 | 0.30825 | 0.165 | 0.12 | 1 | HC_vs_MS.Trt_F |
| TRAPPC2B | 0.11189 | 0.41881 | 0.436 | 0.37 | 1 | HC_vs_MS.Trt_F |
| PAIP2    | 0.11203 | -0.3697 | 0.607 | 0.67 | 1 | HC_vs_MS.Trt_F |
| PWP2     | 0.11216 | 0.37662 | 0.124 | 0.09 | 1 | HC_vs_MS.Trt_F |
| NXT1     | 0.1124  | 0.40917 | 0.118 | 0.08 | 1 | HC_vs_MS.Trt_F |
| ZNF596   | 0.11254 | -0.7699 | 0.512 | 0.45 | 1 | HC_vs_MS.Trt_F |
| ACSL3    | 0.11278 | 0.42555 | 0.162 | 0.12 | 1 | HC_vs_MS.Trt_F |
| MAP3K9   | 0.11291 | -0.4104 | 0.474 | 0.42 | 1 | HC_vs_MS.Trt_F |
| JKAMP    | 0.11294 | 0.30808 | 0.847 | 0.8  | 1 | HC_vs_MS.Trt_F |
| AREL1    | 0.11318 | 0.51963 | 0.52  | 0.45 | 1 | HC_vs_MS.Trt_F |
| VASP     | 0.11357 | 0.3053  | 0.645 | 0.57 | 1 | HC_vs_MS.Trt_F |
| NAV2     | 0.11365 | 1.07582 | 0.408 | 0.44 | 1 | HC_vs_MS.Trt_F |
| PXDN     | 0.1138  | 1.00555 | 0.26  | 0.2  | 1 | HC_vs_MS.Trt_F |
| KLK2     | 0.11385 | 0.34461 | 0.379 | 0.3  | 1 | HC_vs_MS.Trt_F |
| APOL2    | 0.11395 | -0.6098 | 0.523 | 0.57 | 1 | HC_vs_MS.Trt_F |
| MAML1    | 0.11403 | 0.54189 | 0.208 | 0.16 | 1 | HC_vs_MS.Trt_F |
| BCAS1    | 0.11405 | 0.8609  | 0.425 | 0.35 | 1 | HC_vs_MS.Trt_F |
| ETNK2    | 0.11409 | 0.3578  | 0.249 | 0.2  | 1 | HC_vs_MS.Trt_F |
| TMEM9    | 0.11424 | 0.33487 | 0.133 | 0.09 | 1 | HC_vs_MS.Trt_F |
| RMND5B   | 0.11427 | 0.658   | 0.682 | 0.61 | 1 | HC_vs_MS.Trt_F |
| USP49    | 0.11431 | 0.26157 | 0.694 | 0.75 | 1 | HC_vs_MS.Trt_F |
| BEST1    | 0.11512 | 0.30308 | 0.861 | 0.81 | 1 | HC_vs_MS.Trt_F |
| LARGE1   | 0.11514 | 0.35086 | 0.613 | 0.55 | 1 | HC_vs_MS.Trt_F |
| CCDC85C  | 0.11527 | 0.43249 | 0.477 | 0.42 | 1 | HC_vs_MS.Trt_F |
| MSL1     | 0.11537 | -0.5398 | 0.624 | 0.53 | 1 | HC_vs_MS.Trt_F |
| SLC2A13  | 0.11547 | 0.42745 | 0.332 | 0.27 | 1 | HC_vs_MS.Trt_F |
| BAZ1B    | 0.11559 | 0.30601 | 0.197 | 0.14 | 1 | HC_vs_MS.Trt_F |
| PPP1R16A | 0.11569 | 0.25589 | 0.477 | 0.41 | 1 | HC_vs_MS.Trt_F |
| MRM3     | 0.1157  | 0.62969 | 0.347 | 0.3  | 1 | HC_vs_MS.Trt_F |
| PLD6     | 0.11599 | -0.4698 | 0.477 | 0.41 | 1 | HC_vs_MS.Trt_F |
| TMC6     | 0.11607 | -0.4128 | 0.766 | 0.81 | 1 | HC_vs_MS.Trt_F |
| BUB3     | 0.11609 | -0.7213 | 0.668 | 0.66 | 1 | HC_vs_MS.Trt_F |
| CHMP7    | 0.11613 | -0.4379 | 0.465 | 0.51 | 1 | HC_vs_MS.Trt_F |
| CXCR3    | 0.11615 | 0.77422 | 0.228 | 0.18 | 1 | HC_vs_MS.Trt_F |
| THAP3    | 0.11624 | 0.37718 | 0.145 | 0.1  | 1 | HC_vs_MS.Trt_F |
| DNAJC21  | 0.11629 | 0.28582 | 0.428 | 0.38 | 1 | HC_vs_MS.Trt_F |

|           |         |         |       |      |   |                |
|-----------|---------|---------|-------|------|---|----------------|
| CDK13     | 0.11638 | -0.4545 | 0.908 | 0.84 | 1 | HC_vs_MS.Trt_F |
| ADARB1    | 0.11639 | 0.95219 | 0.263 | 0.21 | 1 | HC_vs_MS.Trt_F |
| BRPF3     | 0.11655 | -0.5067 | 0.066 | 0.1  | 1 | HC_vs_MS.Trt_F |
| HYAL4     | 0.11657 | 0.42147 | 0.549 | 0.46 | 1 | HC_vs_MS.Trt_F |
| HMGCS1    | 0.11658 | 0.32445 | 0.592 | 0.56 | 1 | HC_vs_MS.Trt_F |
| HDAC10    | 0.11683 | 1.4423  | 0.179 | 0.13 | 1 | HC_vs_MS.Trt_F |
| PRAF2     | 0.11691 | 0.35826 | 0.136 | 0.09 | 1 | HC_vs_MS.Trt_F |
| NUP153    | 0.11701 | 0.70996 | 0.249 | 0.19 | 1 | HC_vs_MS.Trt_F |
| CHST14    | 0.1171  | -0.6    | 0.303 | 0.25 | 1 | HC_vs_MS.Trt_F |
| ITGA2B    | 0.1172  | 0.48754 | 0.471 | 0.41 | 1 | HC_vs_MS.Trt_F |
| ERBB3     | 0.11726 | -0.2681 | 0.803 | 0.72 | 1 | HC_vs_MS.Trt_F |
| METTL3    | 0.11727 | -0.2948 | 0.679 | 0.6  | 1 | HC_vs_MS.Trt_F |
| EXD2      | 0.11739 | -1.9529 | 0.275 | 0.21 | 1 | HC_vs_MS.Trt_F |
| NICN1     | 0.11747 | 0.37257 | 0.876 | 0.78 | 1 | HC_vs_MS.Trt_F |
| ST6GALNAC | 0.11748 | 0.70898 | 0.257 | 0.21 | 1 | HC_vs_MS.Trt_F |
| FAM174B   | 0.11763 | 1.25098 | 0.173 | 0.13 | 1 | HC_vs_MS.Trt_F |
| ZNF497    | 0.11772 | 0.25205 | 0.353 | 0.29 | 1 | HC_vs_MS.Trt_F |
| MRPL34    | 0.11777 | -0.6396 | 0.329 | 0.26 | 1 | HC_vs_MS.Trt_F |
| ADIPOR2   | 0.11789 | -0.3945 | 0.159 | 0.2  | 1 | HC_vs_MS.Trt_F |
| AURKA     | 0.11795 | -0.5479 | 0.358 | 0.31 | 1 | HC_vs_MS.Trt_F |
| METTL2B   | 0.11797 | 0.32747 | 0.988 | 0.96 | 1 | HC_vs_MS.Trt_F |
| RNF220    | 0.11822 | 0.38965 | 0.699 | 0.6  | 1 | HC_vs_MS.Trt_F |
| SELL      | 0.11825 | -0.4388 | 0.546 | 0.55 | 1 | HC_vs_MS.Trt_F |
| MBNL3     | 0.11827 | 0.35997 | 0.15  | 0.11 | 1 | HC_vs_MS.Trt_F |
| DTNB      | 0.1183  | 0.46801 | 0.214 | 0.17 | 1 | HC_vs_MS.Trt_F |
| GATB      | 0.11835 | 1.53621 | 0.292 | 0.24 | 1 | HC_vs_MS.Trt_F |
| LRRC32    | 0.1184  | 1.62954 | 0.101 | 0.07 | 1 | HC_vs_MS.Trt_F |
| TFAM      | 0.11878 | 0.2672  | 0.321 | 0.26 | 1 | HC_vs_MS.Trt_F |
| RBM41     | 0.11878 | 0.30412 | 0.428 | 0.35 | 1 | HC_vs_MS.Trt_F |
| VWA7      | 0.11927 | 0.80883 | 0.387 | 0.32 | 1 | HC_vs_MS.Trt_F |
| ACTR5     | 0.1193  | 0.35053 | 0.168 | 0.12 | 1 | HC_vs_MS.Trt_F |
| IRAK1     | 0.11964 | 0.2867  | 0.292 | 0.23 | 1 | HC_vs_MS.Trt_F |
| ATRN      | 0.1199  | 0.72321 | 0.165 | 0.12 | 1 | HC_vs_MS.Trt_F |
| C3orf33   | 0.11991 | -0.5365 | 0.532 | 0.5  | 1 | HC_vs_MS.Trt_F |
| TMEM53    | 0.12026 | -0.573  | 0.364 | 0.29 | 1 | HC_vs_MS.Trt_F |
| DNAJC19   | 0.12049 | -0.3838 | 0.298 | 0.23 | 1 | HC_vs_MS.Trt_F |
| WRAP73    | 0.12051 | -0.2738 | 0.37  | 0.3  | 1 | HC_vs_MS.Trt_F |
| FRG1      | 0.12071 | -0.6182 | 0.471 | 0.4  | 1 | HC_vs_MS.Trt_F |
| PIM3      | 0.12102 | 0.77875 | 0.176 | 0.13 | 1 | HC_vs_MS.Trt_F |
| METTL25   | 0.12114 | 0.38054 | 0.257 | 0.21 | 1 | HC_vs_MS.Trt_F |

|             |         |         |       |      |   |                |
|-------------|---------|---------|-------|------|---|----------------|
| ODC1        | 0.12121 | 0.38526 | 0.142 | 0.1  | 1 | HC_vs_MS.Trt_F |
| THAP9       | 0.12139 | 0.45002 | 0.639 | 0.58 | 1 | HC_vs_MS.Trt_F |
| HHLA3       | 0.12155 | 0.57979 | 0.355 | 0.3  | 1 | HC_vs_MS.Trt_F |
| HSD17B11    | 0.12161 | -0.438  | 0.532 | 0.45 | 1 | HC_vs_MS.Trt_F |
| HMG20A      | 0.12168 | 0.28048 | 0.306 | 0.25 | 1 | HC_vs_MS.Trt_F |
| TMPRSS4-AS1 | 0.12177 | -0.3928 | 0.069 | 0.1  | 1 | HC_vs_MS.Trt_F |
| NUTF2       | 0.12182 | 0.36327 | 0.22  | 0.17 | 1 | HC_vs_MS.Trt_F |
| ZNF670      | 0.1222  | 1.18773 | 0.205 | 0.16 | 1 | HC_vs_MS.Trt_F |
| YAF2        | 0.12225 | -0.4794 | 0.769 | 0.69 | 1 | HC_vs_MS.Trt_F |
| SBF1        | 0.12298 | 0.80111 | 0.22  | 0.17 | 1 | HC_vs_MS.Trt_F |
| IFT43       | 0.12303 | -0.4173 | 0.069 | 0.1  | 1 | HC_vs_MS.Trt_F |
| FLYWCH1     | 0.12321 | 0.95219 | 0.832 | 0.76 | 1 | HC_vs_MS.Trt_F |
| ZNF468      | 0.12326 | -0.7027 | 0.529 | 0.46 | 1 | HC_vs_MS.Trt_F |
| ZNF335      | 0.12379 | 0.90258 | 0.376 | 0.33 | 1 | HC_vs_MS.Trt_F |
| ALG5        | 0.12384 | -0.4046 | 0.442 | 0.48 | 1 | HC_vs_MS.Trt_F |
| ATP6V0A2    | 0.12387 | 0.33889 | 0.971 | 0.95 | 1 | HC_vs_MS.Trt_F |
| MED7        | 0.12421 | -0.5608 | 0.081 | 0.12 | 1 | HC_vs_MS.Trt_F |
| GAMT        | 0.1243  | 0.57235 | 0.63  | 0.54 | 1 | HC_vs_MS.Trt_F |
| KLF15       | 0.12439 | 0.31093 | 0.217 | 0.18 | 1 | HC_vs_MS.Trt_F |
| PRPF4       | 0.1246  | -0.3484 | 0.361 | 0.3  | 1 | HC_vs_MS.Trt_F |
| LMF1        | 0.12527 | 0.77831 | 0.156 | 0.12 | 1 | HC_vs_MS.Trt_F |
| HMGXB3      | 0.12566 | 0.84693 | 0.223 | 0.17 | 1 | HC_vs_MS.Trt_F |
| VAC14       | 0.12573 | 0.7045  | 0.133 | 0.09 | 1 | HC_vs_MS.Trt_F |
| HSD17B1     | 0.12587 | 0.46224 | 0.751 | 0.77 | 1 | HC_vs_MS.Trt_F |
| FAM208B     | 0.1259  | -0.64   | 0.35  | 0.28 | 1 | HC_vs_MS.Trt_F |
| STOML2      | 0.12614 | 0.359   | 0.179 | 0.13 | 1 | HC_vs_MS.Trt_F |
| EML3        | 0.12614 | 0.66604 | 0.269 | 0.22 | 1 | HC_vs_MS.Trt_F |
| DDI2        | 0.12626 | 0.36933 | 0.812 | 0.77 | 1 | HC_vs_MS.Trt_F |
| PARD6G      | 0.12641 | -0.4062 | 0.59  | 0.51 | 1 | HC_vs_MS.Trt_F |
| CHD6        | 0.12641 | -0.3542 | 0.251 | 0.19 | 1 | HC_vs_MS.Trt_F |
| RP11-307N1  | 0.12652 | 0.41358 | 0.116 | 0.08 | 1 | HC_vs_MS.Trt_F |
| FLYWCH2     | 0.1266  | 1.11421 | 0.107 | 0.07 | 1 | HC_vs_MS.Trt_F |
| SSH3        | 0.12694 | 1.1673  | 0.107 | 0.07 | 1 | HC_vs_MS.Trt_F |
| TRAK2       | 0.12694 | -0.3732 | 0.223 | 0.16 | 1 | HC_vs_MS.Trt_F |
| LCMT2       | 0.12711 | 0.51444 | 0.723 | 0.67 | 1 | HC_vs_MS.Trt_F |
| ZFPM2       | 0.12756 | 0.49968 | 0.442 | 0.41 | 1 | HC_vs_MS.Trt_F |
| FBXL3       | 0.12759 | 0.78067 | 0.176 | 0.13 | 1 | HC_vs_MS.Trt_F |
| DCTN3       | 0.1276  | -0.6162 | 0.402 | 0.45 | 1 | HC_vs_MS.Trt_F |
| CIAPIN1     | 0.12761 | -0.718  | 0.098 | 0.13 | 1 | HC_vs_MS.Trt_F |
| FAM76B      | 0.12762 | 0.46955 | 0.142 | 0.1  | 1 | HC_vs_MS.Trt_F |

|          |         |         |       |      |   |                |
|----------|---------|---------|-------|------|---|----------------|
| NUSAP1   | 0.12771 | 0.45753 | 0.783 | 0.73 | 1 | HC_vs_MS.Trt_F |
| UROS     | 0.12808 | 0.948   | 0.509 | 0.45 | 1 | HC_vs_MS.Trt_F |
| HARS     | 0.12824 | -0.5559 | 0.867 | 0.87 | 1 | HC_vs_MS.Trt_F |
| FCRL2    | 0.1283  | 0.51376 | 0.723 | 0.62 | 1 | HC_vs_MS.Trt_F |
| DDOST    | 0.12831 | -0.2925 | 0.665 | 0.59 | 1 | HC_vs_MS.Trt_F |
| PHF20L1  | 0.12845 | -0.5453 | 0.662 | 0.67 | 1 | HC_vs_MS.Trt_F |
| ALKBH2   | 0.12869 | -0.6715 | 0.37  | 0.31 | 1 | HC_vs_MS.Trt_F |
| CEACAM21 | 0.12883 | -0.4895 | 0.275 | 0.31 | 1 | HC_vs_MS.Trt_F |
| SLC18B1  | 0.129   | 1.39238 | 0.116 | 0.08 | 1 | HC_vs_MS.Trt_F |
| PPP2R5C  | 0.12929 | -0.4148 | 0.936 | 0.92 | 1 | HC_vs_MS.Trt_F |
| GIMAP5   | 0.12942 | -0.4705 | 0.292 | 0.34 | 1 | HC_vs_MS.Trt_F |
| ZNF683   | 0.12951 | 0.98131 | 0.075 | 0.11 | 1 | HC_vs_MS.Trt_F |
| KIAA0391 | 0.12953 | 0.32643 | 0.754 | 0.69 | 1 | HC_vs_MS.Trt_F |
| ADH5     | 0.12976 | -0.5865 | 0.555 | 0.45 | 1 | HC_vs_MS.Trt_F |
| OPRD1    | 0.12981 | 0.35593 | 0.855 | 0.8  | 1 | HC_vs_MS.Trt_F |
| ARFGAP3  | 0.13007 | 0.30052 | 0.376 | 0.33 | 1 | HC_vs_MS.Trt_F |
| CASP4    | 0.13031 | -0.6745 | 0.361 | 0.4  | 1 | HC_vs_MS.Trt_F |
| PDE12    | 0.13064 | -0.2515 | 0.919 | 0.86 | 1 | HC_vs_MS.Trt_F |
| PLEKHH2  | 0.13078 | 0.76645 | 0.697 | 0.67 | 1 | HC_vs_MS.Trt_F |
| TMEM138  | 0.1308  | 0.68946 | 0.867 | 0.81 | 1 | HC_vs_MS.Trt_F |
| TMEM242  | 0.13108 | 0.62538 | 0.171 | 0.13 | 1 | HC_vs_MS.Trt_F |
| ANGPTL4  | 0.13125 | 1.23884 | 0.35  | 0.28 | 1 | HC_vs_MS.Trt_F |
| AIMP2    | 0.13129 | -0.5772 | 0.358 | 0.29 | 1 | HC_vs_MS.Trt_F |
| NR1D1    | 0.13141 | 0.52984 | 0.153 | 0.11 | 1 | HC_vs_MS.Trt_F |
| ZKSCAN4  | 0.13153 | -0.7398 | 0.572 | 0.49 | 1 | HC_vs_MS.Trt_F |
| ABCF1    | 0.13162 | 0.38924 | 0.841 | 0.82 | 1 | HC_vs_MS.Trt_F |
| MRPL42   | 0.13173 | -0.5099 | 0.98  | 0.96 | 1 | HC_vs_MS.Trt_F |
| TMEM62   | 0.13176 | 0.49649 | 0.277 | 0.22 | 1 | HC_vs_MS.Trt_F |
| ADGRG2   | 0.1318  | 0.25454 | 0.665 | 0.59 | 1 | HC_vs_MS.Trt_F |
| SKIV2L   | 0.13181 | 0.68451 | 0.185 | 0.14 | 1 | HC_vs_MS.Trt_F |
| TDP2     | 0.13184 | 0.29137 | 0.156 | 0.12 | 1 | HC_vs_MS.Trt_F |
| INPP5E   | 0.13198 | -0.2866 | 0.312 | 0.25 | 1 | HC_vs_MS.Trt_F |
| C17orf75 | 0.13214 | -0.2829 | 0.864 | 0.83 | 1 | HC_vs_MS.Trt_F |
| IQCB1    | 0.13219 | 0.80785 | 0.142 | 0.1  | 1 | HC_vs_MS.Trt_F |
| DRC3     | 0.1322  | 0.45961 | 0.621 | 0.57 | 1 | HC_vs_MS.Trt_F |
| CENPH    | 0.1322  | -0.5068 | 0.324 | 0.26 | 1 | HC_vs_MS.Trt_F |
| ZNF76    | 0.13232 | 0.45492 | 0.22  | 0.17 | 1 | HC_vs_MS.Trt_F |
| SRCAP    | 0.13241 | 0.31731 | 0.705 | 0.62 | 1 | HC_vs_MS.Trt_F |
| SMIM8    | 0.13246 | -0.7579 | 0.685 | 0.6  | 1 | HC_vs_MS.Trt_F |
| AP4S1    | 0.13255 | 0.4061  | 0.965 | 0.95 | 1 | HC_vs_MS.Trt_F |

|            |         |         |       |      |   |                |
|------------|---------|---------|-------|------|---|----------------|
| ZNF281     | 0.13265 | 0.85764 | 0.133 | 0.09 | 1 | HC_vs_MS.Trt_F |
| HMGXB4     | 0.13267 | 1.12609 | 0.156 | 0.12 | 1 | HC_vs_MS.Trt_F |
| CCDC85B    | 0.13306 | 0.58405 | 0.153 | 0.11 | 1 | HC_vs_MS.Trt_F |
| DNAJC9     | 0.13348 | -0.8037 | 0.133 | 0.17 | 1 | HC_vs_MS.Trt_F |
| GLO1       | 0.13349 | 0.40797 | 0.124 | 0.09 | 1 | HC_vs_MS.Trt_F |
| RNF168     | 0.13367 | -0.9922 | 0.592 | 0.57 | 1 | HC_vs_MS.Trt_F |
| C1QTNF7    | 0.13386 | 0.44934 | 0.081 | 0.12 | 1 | HC_vs_MS.Trt_F |
| TADA2B     | 0.13395 | 0.8373  | 0.361 | 0.3  | 1 | HC_vs_MS.Trt_F |
| ZNF552     | 0.13402 | 0.49292 | 0.486 | 0.43 | 1 | HC_vs_MS.Trt_F |
| GRAMD4     | 0.13404 | 1.1572  | 0.104 | 0.07 | 1 | HC_vs_MS.Trt_F |
| ARL5C      | 0.13405 | 0.37703 | 0.451 | 0.38 | 1 | HC_vs_MS.Trt_F |
| CSNK1A1    | 0.13434 | -0.4345 | 0.841 | 0.89 | 1 | HC_vs_MS.Trt_F |
| CRYZL1     | 0.1344  | -0.3206 | 0.965 | 0.95 | 1 | HC_vs_MS.Trt_F |
| MEF2A      | 0.13462 | -0.5089 | 0.572 | 0.5  | 1 | HC_vs_MS.Trt_F |
| NBR1       | 0.13472 | 0.31493 | 0.832 | 0.78 | 1 | HC_vs_MS.Trt_F |
| ZSWIM8     | 0.13474 | 0.37092 | 0.838 | 0.83 | 1 | HC_vs_MS.Trt_F |
| TMEM108    | 0.13515 | 1.11021 | 0.367 | 0.31 | 1 | HC_vs_MS.Trt_F |
| PRRG1      | 0.13528 | 0.44113 | 0.251 | 0.19 | 1 | HC_vs_MS.Trt_F |
| CMTR2      | 0.1353  | 0.32232 | 0.321 | 0.27 | 1 | HC_vs_MS.Trt_F |
| CHMP2A     | 0.13569 | 0.25432 | 0.199 | 0.15 | 1 | HC_vs_MS.Trt_F |
| ARMC5      | 0.13576 | -0.4935 | 0.162 | 0.12 | 1 | HC_vs_MS.Trt_F |
| PRPS1      | 0.13581 | 0.47864 | 0.162 | 0.12 | 1 | HC_vs_MS.Trt_F |
| GNLY       | 0.13584 | 0.50616 | 0.312 | 0.25 | 1 | HC_vs_MS.Trt_F |
| KIAA0825   | 0.13633 | -0.3873 | 0.361 | 0.3  | 1 | HC_vs_MS.Trt_F |
| TOM1L2     | 0.13643 | 0.26596 | 0.257 | 0.2  | 1 | HC_vs_MS.Trt_F |
| ATF5       | 0.13689 | -0.4088 | 0.341 | 0.26 | 1 | HC_vs_MS.Trt_F |
| TSC22D1    | 0.13708 | -0.261  | 0.116 | 0.08 | 1 | HC_vs_MS.Trt_F |
| RYK        | 0.13722 | 1.00326 | 0.118 | 0.08 | 1 | HC_vs_MS.Trt_F |
| CAPN5      | 0.13734 | 0.35529 | 0.309 | 0.25 | 1 | HC_vs_MS.Trt_F |
| RP5-1022E2 | 0.1377  | -0.5549 | 0.113 | 0.15 | 1 | HC_vs_MS.Trt_F |
| SLAMF6     | 0.138   | -0.3394 | 0.549 | 0.47 | 1 | HC_vs_MS.Trt_F |
| AMY2B      | 0.13815 | 0.31962 | 0.607 | 0.66 | 1 | HC_vs_MS.Trt_F |
| CYP46A1    | 0.13852 | -0.6417 | 0.63  | 0.55 | 1 | HC_vs_MS.Trt_F |
| RNF6       | 0.13904 | -0.8068 | 0.162 | 0.2  | 1 | HC_vs_MS.Trt_F |
| POLR3B     | 0.13904 | 0.62687 | 0.182 | 0.14 | 1 | HC_vs_MS.Trt_F |
| ACSL1      | 0.13906 | -0.2981 | 0.28  | 0.23 | 1 | HC_vs_MS.Trt_F |
| ZNF316     | 0.1392  | -0.5109 | 0.627 | 0.53 | 1 | HC_vs_MS.Trt_F |
| WARS2      | 0.13931 | 0.29066 | 0.11  | 0.08 | 1 | HC_vs_MS.Trt_F |
| EXOSC3     | 0.14013 | 0.66057 | 0.465 | 0.39 | 1 | HC_vs_MS.Trt_F |
| ATG13      | 0.14035 | -0.3299 | 0.89  | 0.8  | 1 | HC_vs_MS.Trt_F |



|          |         |         |       |      |   |                |
|----------|---------|---------|-------|------|---|----------------|
| WDR83OS  | 0.14035 | 0.27727 | 0.231 | 0.18 | 1 | HC_vs_MS.Trt_F |
| TSEN34   | 0.14038 | 0.59007 | 0.159 | 0.21 | 1 | HC_vs_MS.Trt_F |
| C5orf22  | 0.14067 | -0.5596 | 0.355 | 0.29 | 1 | HC_vs_MS.Trt_F |
| PEX11B   | 0.14096 | 0.60897 | 0.159 | 0.12 | 1 | HC_vs_MS.Trt_F |
| SAP130   | 0.14107 | 0.39977 | 0.194 | 0.15 | 1 | HC_vs_MS.Trt_F |
| MEI1     | 0.14114 | 0.36411 | 0.734 | 0.69 | 1 | HC_vs_MS.Trt_F |
| XRCC3    | 0.14123 | 0.32553 | 0.514 | 0.45 | 1 | HC_vs_MS.Trt_F |
| CD82     | 0.14126 | 0.27952 | 0.717 | 0.65 | 1 | HC_vs_MS.Trt_F |
| POFUT2   | 0.14168 | 0.94058 | 0.104 | 0.07 | 1 | HC_vs_MS.Trt_F |
| CHFR     | 0.14172 | -0.4966 | 0.942 | 0.94 | 1 | HC_vs_MS.Trt_F |
| CCDC18   | 0.14175 | 0.42839 | 0.249 | 0.2  | 1 | HC_vs_MS.Trt_F |
| RCOR3    | 0.14175 | 0.29397 | 0.48  | 0.4  | 1 | HC_vs_MS.Trt_F |
| TM9SF1   | 0.14191 | -0.8204 | 0.318 | 0.26 | 1 | HC_vs_MS.Trt_F |
| ARF3     | 0.14195 | 0.28129 | 0.228 | 0.18 | 1 | HC_vs_MS.Trt_F |
| ZNF589   | 0.142   | -0.3439 | 0.538 | 0.45 | 1 | HC_vs_MS.Trt_F |
| TMA7     | 0.14219 | -0.6496 | 0.601 | 0.58 | 1 | HC_vs_MS.Trt_F |
| ERCC6L2  | 0.14226 | -0.438  | 0.234 | 0.18 | 1 | HC_vs_MS.Trt_F |
| RBPMS    | 0.14234 | 0.36801 | 0.199 | 0.16 | 1 | HC_vs_MS.Trt_F |
| GCC2     | 0.14252 | -0.3603 | 0.803 | 0.75 | 1 | HC_vs_MS.Trt_F |
| SLC39A4  | 0.14276 | 0.40764 | 0.393 | 0.33 | 1 | HC_vs_MS.Trt_F |
| DENND3   | 0.14279 | 1.13818 | 0.564 | 0.49 | 1 | HC_vs_MS.Trt_F |
| ALG6     | 0.14324 | -0.7652 | 0.147 | 0.18 | 1 | HC_vs_MS.Trt_F |
| CNOT9    | 0.1436  | -0.4866 | 0.746 | 0.75 | 1 | HC_vs_MS.Trt_F |
| STK26    | 0.14383 | 0.63885 | 0.147 | 0.11 | 1 | HC_vs_MS.Trt_F |
| CEP68    | 0.14385 | -0.5731 | 0.598 | 0.51 | 1 | HC_vs_MS.Trt_F |
| 1-Mar    | 0.14394 | 0.36193 | 0.344 | 0.28 | 1 | HC_vs_MS.Trt_F |
| SMARCD1  | 0.14432 | 0.98188 | 0.139 | 0.1  | 1 | HC_vs_MS.Trt_F |
| MAPT     | 0.14435 | 0.50189 | 0.746 | 0.67 | 1 | HC_vs_MS.Trt_F |
| PFKFB2   | 0.14454 | -1.1358 | 0.225 | 0.28 | 1 | HC_vs_MS.Trt_F |
| TPD52L1  | 0.14459 | 0.47405 | 0.769 | 0.73 | 1 | HC_vs_MS.Trt_F |
| SPEF2    | 0.14481 | 0.88853 | 0.595 | 0.54 | 1 | HC_vs_MS.Trt_F |
| PLEK     | 0.145   | -0.6334 | 0.084 | 0.12 | 1 | HC_vs_MS.Trt_F |
| CAPRN2   | 0.14515 | 0.85403 | 0.757 | 0.67 | 1 | HC_vs_MS.Trt_F |
| RUFY2    | 0.14515 | -0.6496 | 0.592 | 0.48 | 1 | HC_vs_MS.Trt_F |
| ZFAND4   | 0.14533 | -0.6104 | 0.523 | 0.44 | 1 | HC_vs_MS.Trt_F |
| WASH1    | 0.1455  | 0.28497 | 0.266 | 0.22 | 1 | HC_vs_MS.Trt_F |
| IDNK     | 0.14558 | -0.4331 | 0.454 | 0.37 | 1 | HC_vs_MS.Trt_F |
| MARVELD3 | 0.14564 | 0.28991 | 0.91  | 0.85 | 1 | HC_vs_MS.Trt_F |
| MED23    | 0.14577 | -0.3471 | 0.266 | 0.21 | 1 | HC_vs_MS.Trt_F |
| CC2D2A   | 0.14587 | 0.71177 | 0.257 | 0.21 | 1 | HC_vs_MS.Trt_F |

|          |         |         |       |      |   |                |
|----------|---------|---------|-------|------|---|----------------|
| C19orf12 | 0.14603 | 0.51769 | 0.434 | 0.36 | 1 | HC_vs_MS.Trt_F |
| ZC3H14   | 0.14606 | -0.3715 | 0.957 | 0.94 | 1 | HC_vs_MS.Trt_F |
| HID1     | 0.14619 | 0.25219 | 0.168 | 0.21 | 1 | HC_vs_MS.Trt_F |
| TFEB     | 0.14622 | -0.5016 | 0.486 | 0.5  | 1 | HC_vs_MS.Trt_F |
| PRF1     | 0.14673 | -0.4491 | 0.223 | 0.26 | 1 | HC_vs_MS.Trt_F |
| MNT      | 0.14676 | 0.38346 | 0.711 | 0.62 | 1 | HC_vs_MS.Trt_F |
| PTPA     | 0.14683 | 0.28871 | 0.795 | 0.73 | 1 | HC_vs_MS.Trt_F |
| CHCHD3   | 0.14684 | 0.26823 | 0.173 | 0.13 | 1 | HC_vs_MS.Trt_F |
| BTD      | 0.14707 | 0.60256 | 0.136 | 0.1  | 1 | HC_vs_MS.Trt_F |
| MTA1     | 0.14709 | 0.32494 | 0.445 | 0.39 | 1 | HC_vs_MS.Trt_F |
| FASTK    | 0.14711 | 0.28558 | 0.188 | 0.14 | 1 | HC_vs_MS.Trt_F |
| KIF21A   | 0.14726 | 0.50145 | 0.22  | 0.17 | 1 | HC_vs_MS.Trt_F |
| MRPS7    | 0.14741 | 0.27878 | 0.601 | 0.52 | 1 | HC_vs_MS.Trt_F |
| ZC3H4    | 0.14755 | -0.4478 | 0.341 | 0.37 | 1 | HC_vs_MS.Trt_F |
| ZNF551   | 0.14777 | 0.47763 | 0.543 | 0.49 | 1 | HC_vs_MS.Trt_F |
| FBXO18   | 0.1478  | -0.3786 | 0.448 | 0.38 | 1 | HC_vs_MS.Trt_F |
| WWC3     | 0.14781 | -0.3381 | 0.462 | 0.39 | 1 | HC_vs_MS.Trt_F |
| NPHP1    | 0.14793 | 0.30182 | 0.746 | 0.68 | 1 | HC_vs_MS.Trt_F |
| MAPK9    | 0.14891 | -1.0156 | 0.509 | 0.46 | 1 | HC_vs_MS.Trt_F |
| TMUB1    | 0.14893 | 0.56158 | 0.139 | 0.1  | 1 | HC_vs_MS.Trt_F |
| CCR2     | 0.14926 | 0.84059 | 0.153 | 0.12 | 1 | HC_vs_MS.Trt_F |
| SDF2L1   | 0.14938 | -0.6053 | 0.136 | 0.17 | 1 | HC_vs_MS.Trt_F |
| SGPP2    | 0.14943 | 0.41783 | 0.399 | 0.34 | 1 | HC_vs_MS.Trt_F |
| C3orf70  | 0.14972 | 0.32058 | 0.801 | 0.73 | 1 | HC_vs_MS.Trt_F |
| NEK9     | 0.15013 | 0.28    | 0.913 | 0.9  | 1 | HC_vs_MS.Trt_F |
| GRAMD3   | 0.15017 | 0.90146 | 0.757 | 0.68 | 1 | HC_vs_MS.Trt_F |
| NEK6     | 0.15034 | -0.3176 | 0.162 | 0.12 | 1 | HC_vs_MS.Trt_F |
| ZC3H12C  | 0.15043 | 0.40637 | 0.133 | 0.1  | 1 | HC_vs_MS.Trt_F |
| PACRGL   | 0.15057 | 0.83059 | 0.312 | 0.26 | 1 | HC_vs_MS.Trt_F |
| GNA11    | 0.15099 | 0.30733 | 0.572 | 0.5  | 1 | HC_vs_MS.Trt_F |
| KATNBL1  | 0.15112 | -0.4529 | 0.931 | 0.92 | 1 | HC_vs_MS.Trt_F |
| SUV39H2  | 0.15116 | 0.41451 | 0.488 | 0.4  | 1 | HC_vs_MS.Trt_F |
| PPP6R3   | 0.15119 | -0.3138 | 0.486 | 0.52 | 1 | HC_vs_MS.Trt_F |
| JMJD7    | 0.15132 | 0.36381 | 0.171 | 0.13 | 1 | HC_vs_MS.Trt_F |
| SLC4A7   | 0.15136 | -0.4475 | 0.295 | 0.34 | 1 | HC_vs_MS.Trt_F |
| LSM5     | 0.15137 | -0.3321 | 0.561 | 0.5  | 1 | HC_vs_MS.Trt_F |
| AMDHD2   | 0.15149 | 1.16764 | 0.121 | 0.09 | 1 | HC_vs_MS.Trt_F |
| CEP104   | 0.15164 | 0.69271 | 0.734 | 0.71 | 1 | HC_vs_MS.Trt_F |
| MXRA7    | 0.15171 | 0.34809 | 0.795 | 0.76 | 1 | HC_vs_MS.Trt_F |
| ERCC6L   | 0.15213 | -1.5013 | 0.107 | 0.14 | 1 | HC_vs_MS.Trt_F |

|            |         |         |       |      |   |                |
|------------|---------|---------|-------|------|---|----------------|
| TRMT5      | 0.15219 | -0.6227 | 0.165 | 0.21 | 1 | HC_vs_MS.Trt_F |
| PPIL2      | 0.15236 | 0.28265 | 0.454 | 0.39 | 1 | HC_vs_MS.Trt_F |
| ZNF260     | 0.15237 | -0.3617 | 0.627 | 0.53 | 1 | HC_vs_MS.Trt_F |
| CLSTN1     | 0.1524  | 0.26409 | 0.188 | 0.14 | 1 | HC_vs_MS.Trt_F |
| VCPIP1     | 0.15249 | -0.3246 | 0.439 | 0.37 | 1 | HC_vs_MS.Trt_F |
| AC013264.1 | 0.15252 | -0.5078 | 0.402 | 0.45 | 1 | HC_vs_MS.Trt_F |
| RGS12      | 0.15261 | 0.78399 | 0.887 | 0.86 | 1 | HC_vs_MS.Trt_F |
| CCDC120    | 0.15272 | 1.14162 | 0.587 | 0.51 | 1 | HC_vs_MS.Trt_F |
| CD200      | 0.15278 | -1.0287 | 0.662 | 0.7  | 1 | HC_vs_MS.Trt_F |
| SIRT3      | 0.15294 | 1.20462 | 0.318 | 0.37 | 1 | HC_vs_MS.Trt_F |
| SSFA2      | 0.15302 | 0.90916 | 0.191 | 0.14 | 1 | HC_vs_MS.Trt_F |
| FADS2      | 0.15305 | 0.46287 | 0.59  | 0.53 | 1 | HC_vs_MS.Trt_F |
| ZNF649     | 0.15319 | 0.42676 | 0.205 | 0.16 | 1 | HC_vs_MS.Trt_F |
| SETDB2     | 0.15329 | -0.414  | 0.896 | 0.85 | 1 | HC_vs_MS.Trt_F |
| MCCC1      | 0.15379 | 0.41246 | 0.555 | 0.49 | 1 | HC_vs_MS.Trt_F |
| ZDHHC20    | 0.15396 | 0.38716 | 0.526 | 0.46 | 1 | HC_vs_MS.Trt_F |
| NDOR1      | 0.15447 | 0.7662  | 0.113 | 0.08 | 1 | HC_vs_MS.Trt_F |
| NAB1       | 0.15472 | 0.66073 | 0.153 | 0.12 | 1 | HC_vs_MS.Trt_F |
| ITCH       | 0.15494 | 0.38835 | 0.529 | 0.48 | 1 | HC_vs_MS.Trt_F |
| CDC42SE2   | 0.15507 | -0.413  | 0.847 | 0.82 | 1 | HC_vs_MS.Trt_F |
| VBP1       | 0.15537 | 0.53086 | 0.142 | 0.1  | 1 | HC_vs_MS.Trt_F |
| DDX51      | 0.15539 | -0.419  | 0.685 | 0.68 | 1 | HC_vs_MS.Trt_F |
| EFHD2      | 0.15547 | 0.57054 | 0.182 | 0.14 | 1 | HC_vs_MS.Trt_F |
| FAM86B1    | 0.15562 | -0.3001 | 0.081 | 0.12 | 1 | HC_vs_MS.Trt_F |
| ACACA      | 0.15599 | 0.95329 | 0.645 | 0.59 | 1 | HC_vs_MS.Trt_F |
| SIPA1      | 0.15606 | -0.5665 | 0.662 | 0.53 | 1 | HC_vs_MS.Trt_F |
| CLK1       | 0.15628 | 0.28345 | 0.725 | 0.68 | 1 | HC_vs_MS.Trt_F |
| PHF2       | 0.15637 | 0.41255 | 0.104 | 0.07 | 1 | HC_vs_MS.Trt_F |
| ZCCHC6     | 0.15639 | -0.4115 | 0.318 | 0.24 | 1 | HC_vs_MS.Trt_F |
| SCFD1      | 0.15655 | 0.2568  | 0.798 | 0.74 | 1 | HC_vs_MS.Trt_F |
| TIE1       | 0.15656 | -0.5888 | 0.613 | 0.62 | 1 | HC_vs_MS.Trt_F |
| TNIP2      | 0.15662 | 0.45822 | 0.147 | 0.11 | 1 | HC_vs_MS.Trt_F |
| WBP1       | 0.15718 | 0.34947 | 0.147 | 0.11 | 1 | HC_vs_MS.Trt_F |
| CENPT      | 0.15724 | -0.2927 | 0.269 | 0.21 | 1 | HC_vs_MS.Trt_F |
| EI24       | 0.1576  | -0.8194 | 0.786 | 0.72 | 1 | HC_vs_MS.Trt_F |
| PBDC1      | 0.15766 | 0.27641 | 0.139 | 0.1  | 1 | HC_vs_MS.Trt_F |
| ZNRF1      | 0.1578  | 0.30799 | 0.344 | 0.3  | 1 | HC_vs_MS.Trt_F |
| CCDC6      | 0.15791 | 1.1002  | 0.121 | 0.09 | 1 | HC_vs_MS.Trt_F |
| CES4A      | 0.15796 | 0.68231 | 0.558 | 0.6  | 1 | HC_vs_MS.Trt_F |
| BRF2       | 0.15813 | 0.34688 | 0.194 | 0.15 | 1 | HC_vs_MS.Trt_F |

|          |         |         |       |      |   |                |
|----------|---------|---------|-------|------|---|----------------|
| PKP2     | 0.15814 | 0.38541 | 0.676 | 0.66 | 1 | HC_vs_MS.Trt_F |
| MTRF1L   | 0.15841 | -0.3261 | 0.133 | 0.09 | 1 | HC_vs_MS.Trt_F |
| HTATIP2  | 0.15842 | 0.51817 | 0.197 | 0.15 | 1 | HC_vs_MS.Trt_F |
| POLR3C   | 0.15846 | 0.39587 | 0.616 | 0.54 | 1 | HC_vs_MS.Trt_F |
| CCDC14   | 0.15849 | 0.8813  | 0.228 | 0.19 | 1 | HC_vs_MS.Trt_F |
| MTHFD2   | 0.15856 | 0.29954 | 0.717 | 0.68 | 1 | HC_vs_MS.Trt_F |
| ZNF699   | 0.15871 | 1.20365 | 0.353 | 0.31 | 1 | HC_vs_MS.Trt_F |
| SLC35B1  | 0.15873 | 0.67503 | 0.708 | 0.66 | 1 | HC_vs_MS.Trt_F |
| SEC23B   | 0.15881 | 0.36826 | 0.191 | 0.15 | 1 | HC_vs_MS.Trt_F |
| SYNC     | 0.15893 | -0.6551 | 0.153 | 0.19 | 1 | HC_vs_MS.Trt_F |
| SLC25A14 | 0.15897 | 1.35657 | 0.324 | 0.26 | 1 | HC_vs_MS.Trt_F |
| CD2AP    | 0.15931 | 0.44429 | 0.211 | 0.16 | 1 | HC_vs_MS.Trt_F |
| CDON     | 0.15937 | 0.55032 | 0.526 | 0.46 | 1 | HC_vs_MS.Trt_F |
| VN1R1    | 0.15943 | 1.26701 | 0.211 | 0.16 | 1 | HC_vs_MS.Trt_F |
| TBC1D2B  | 0.15947 | 0.2573  | 0.358 | 0.3  | 1 | HC_vs_MS.Trt_F |
| PDCD11   | 0.15973 | -0.5259 | 0.277 | 0.22 | 1 | HC_vs_MS.Trt_F |
| PKD2     | 0.15991 | -0.574  | 0.228 | 0.17 | 1 | HC_vs_MS.Trt_F |
| C11orf98 | 0.16019 | 0.25678 | 0.165 | 0.12 | 1 | HC_vs_MS.Trt_F |
| SBNO1    | 0.16019 | -0.4268 | 0.61  | 0.66 | 1 | HC_vs_MS.Trt_F |
| ACSL6    | 0.16038 | -0.287  | 0.618 | 0.66 | 1 | HC_vs_MS.Trt_F |
| TMEM59   | 0.1604  | -0.4806 | 0.882 | 0.9  | 1 | HC_vs_MS.Trt_F |
| CYLC2    | 0.16043 | 0.35855 | 0.118 | 0.09 | 1 | HC_vs_MS.Trt_F |
| CPSF1    | 0.16059 | 0.26011 | 0.214 | 0.17 | 1 | HC_vs_MS.Trt_F |
| ETV4     | 0.16074 | 0.61796 | 0.13  | 0.1  | 1 | HC_vs_MS.Trt_F |
| BTRC     | 0.16075 | 0.94704 | 0.113 | 0.08 | 1 | HC_vs_MS.Trt_F |
| ALDH1L2  | 0.16085 | 0.93212 | 0.335 | 0.28 | 1 | HC_vs_MS.Trt_F |
| AKT1     | 0.16092 | 0.39487 | 0.254 | 0.21 | 1 | HC_vs_MS.Trt_F |
| ARPC2    | 0.16104 | -0.251  | 0.974 | 0.97 | 1 | HC_vs_MS.Trt_F |
| AK5      | 0.16115 | 0.48166 | 0.156 | 0.12 | 1 | HC_vs_MS.Trt_F |
| LRRC45   | 0.16141 | -0.3143 | 0.075 | 0.11 | 1 | HC_vs_MS.Trt_F |
| OSBP2    | 0.16189 | -0.3408 | 0.468 | 0.41 | 1 | HC_vs_MS.Trt_F |
| CPSF3L   | 0.16199 | 0.27862 | 0.815 | 0.73 | 1 | HC_vs_MS.Trt_F |
| GOSR2    | 0.16206 | 0.346   | 0.171 | 0.13 | 1 | HC_vs_MS.Trt_F |
| PAQR3    | 0.16277 | 1.04314 | 0.159 | 0.12 | 1 | HC_vs_MS.Trt_F |
| NKD1     | 0.16294 | 0.30179 | 0.425 | 0.36 | 1 | HC_vs_MS.Trt_F |
| TRIP4    | 0.16309 | -0.4426 | 0.575 | 0.49 | 1 | HC_vs_MS.Trt_F |
| MON1A    | 0.16318 | 1.23054 | 0.116 | 0.08 | 1 | HC_vs_MS.Trt_F |
| LGALS1   | 0.16321 | -0.3391 | 0.477 | 0.38 | 1 | HC_vs_MS.Trt_F |
| ZNF570   | 0.16328 | -0.4905 | 0.832 | 0.79 | 1 | HC_vs_MS.Trt_F |
| CCDC74A  | 0.16338 | 1.05778 | 0.289 | 0.24 | 1 | HC_vs_MS.Trt_F |

|          |         |         |       |      |   |                |
|----------|---------|---------|-------|------|---|----------------|
| RCC1     | 0.16341 | 0.53295 | 0.191 | 0.15 | 1 | HC_vs_MS.Trt_F |
| M1AP     | 0.16425 | 0.3556  | 0.347 | 0.31 | 1 | HC_vs_MS.Trt_F |
| ANKAR    | 0.16433 | 0.67464 | 0.179 | 0.14 | 1 | HC_vs_MS.Trt_F |
| NEDD4L   | 0.16471 | 0.357   | 0.509 | 0.53 | 1 | HC_vs_MS.Trt_F |
| NUPR1    | 0.16519 | 0.28625 | 0.977 | 0.95 | 1 | HC_vs_MS.Trt_F |
| GRAP2    | 0.16526 | 0.25821 | 0.306 | 0.25 | 1 | HC_vs_MS.Trt_F |
| SSNA1    | 0.16563 | 0.31845 | 0.185 | 0.14 | 1 | HC_vs_MS.Trt_F |
| BFAR     | 0.16606 | -0.469  | 0.526 | 0.54 | 1 | HC_vs_MS.Trt_F |
| TMEM186  | 0.1667  | 0.31333 | 0.526 | 0.48 | 1 | HC_vs_MS.Trt_F |
| ORC1     | 0.16685 | 0.58542 | 0.303 | 0.25 | 1 | HC_vs_MS.Trt_F |
| TSN      | 0.16707 | -0.8876 | 0.428 | 0.36 | 1 | HC_vs_MS.Trt_F |
| ELP6     | 0.16758 | -1.1311 | 0.647 | 0.6  | 1 | HC_vs_MS.Trt_F |
| YIF1B    | 0.1676  | -0.342  | 0.694 | 0.61 | 1 | HC_vs_MS.Trt_F |
| PPP1CA   | 0.16763 | -0.2825 | 0.454 | 0.5  | 1 | HC_vs_MS.Trt_F |
| CNIH3    | 0.1679  | 0.78586 | 0.234 | 0.19 | 1 | HC_vs_MS.Trt_F |
| ATP6V0E2 | 0.16824 | 0.3993  | 0.234 | 0.19 | 1 | HC_vs_MS.Trt_F |
| PARP9    | 0.16836 | -0.5135 | 0.408 | 0.33 | 1 | HC_vs_MS.Trt_F |
| TRIM37   | 0.1684  | -0.2704 | 0.24  | 0.19 | 1 | HC_vs_MS.Trt_F |
| EME2     | 0.16843 | 0.51101 | 0.341 | 0.28 | 1 | HC_vs_MS.Trt_F |
| ESPL1    | 0.16852 | -0.7209 | 0.766 | 0.7  | 1 | HC_vs_MS.Trt_F |
| C12orf29 | 0.16865 | -0.4704 | 0.286 | 0.22 | 1 | HC_vs_MS.Trt_F |
| MYNN     | 0.16887 | -0.2532 | 0.341 | 0.28 | 1 | HC_vs_MS.Trt_F |
| CCR7     | 0.1689  | -0.3918 | 0.379 | 0.42 | 1 | HC_vs_MS.Trt_F |
| C11orf21 | 0.16946 | 0.58229 | 0.173 | 0.13 | 1 | HC_vs_MS.Trt_F |
| MLYCD    | 0.1695  | 1.00145 | 0.422 | 0.35 | 1 | HC_vs_MS.Trt_F |
| ITGA3    | 0.16966 | 0.45421 | 0.809 | 0.72 | 1 | HC_vs_MS.Trt_F |
| SIMC1    | 0.16991 | -0.3532 | 0.526 | 0.44 | 1 | HC_vs_MS.Trt_F |
| KIAA0232 | 0.16997 | 0.79465 | 0.156 | 0.12 | 1 | HC_vs_MS.Trt_F |
| POLR1A   | 0.16998 | 0.55402 | 0.772 | 0.69 | 1 | HC_vs_MS.Trt_F |
| ENTPD6   | 0.17    | 0.50332 | 0.15  | 0.11 | 1 | HC_vs_MS.Trt_F |
| TIPARP   | 0.17021 | 0.38881 | 0.165 | 0.13 | 1 | HC_vs_MS.Trt_F |
| COA6     | 0.17029 | -0.2503 | 0.156 | 0.12 | 1 | HC_vs_MS.Trt_F |
| FBXO5    | 0.17036 | 1.27819 | 0.431 | 0.38 | 1 | HC_vs_MS.Trt_F |
| ESYT3    | 0.17039 | 0.43707 | 0.584 | 0.5  | 1 | HC_vs_MS.Trt_F |
| FGFR2    | 0.17051 | 0.36788 | 0.509 | 0.45 | 1 | HC_vs_MS.Trt_F |
| PIAS2    | 0.17082 | 0.32378 | 0.815 | 0.73 | 1 | HC_vs_MS.Trt_F |
| GNAI3    | 0.17083 | -0.294  | 0.988 | 0.96 | 1 | HC_vs_MS.Trt_F |
| VCL      | 0.17091 | 0.52377 | 0.188 | 0.14 | 1 | HC_vs_MS.Trt_F |
| SLC5A6   | 0.17094 | 0.47071 | 0.15  | 0.11 | 1 | HC_vs_MS.Trt_F |
| RBM17    | 0.17099 | -0.3047 | 0.425 | 0.34 | 1 | HC_vs_MS.Trt_F |

|          |         |         |       |      |   |                |
|----------|---------|---------|-------|------|---|----------------|
| ZNF143   | 0.17105 | 0.39376 | 0.15  | 0.11 | 1 | HC_vs_MS.Trt_F |
| UACA     | 0.17108 | 0.52675 | 0.532 | 0.47 | 1 | HC_vs_MS.Trt_F |
| DNM1     | 0.17119 | 0.39531 | 0.65  | 0.59 | 1 | HC_vs_MS.Trt_F |
| FEM1B    | 0.17121 | 0.87806 | 0.124 | 0.09 | 1 | HC_vs_MS.Trt_F |
| ZNF74    | 0.17139 | 1.31165 | 0.494 | 0.45 | 1 | HC_vs_MS.Trt_F |
| CXorf56  | 0.17141 | -0.3198 | 0.78  | 0.7  | 1 | HC_vs_MS.Trt_F |
| ZNF286B  | 0.17144 | -0.8736 | 0.558 | 0.47 | 1 | HC_vs_MS.Trt_F |
| NIPAL3   | 0.17169 | -0.4832 | 0.766 | 0.76 | 1 | HC_vs_MS.Trt_F |
| KIAA1109 | 0.17186 | -0.3688 | 0.373 | 0.31 | 1 | HC_vs_MS.Trt_F |
| ADGRD1   | 0.17193 | 0.65577 | 0.436 | 0.37 | 1 | HC_vs_MS.Trt_F |
| LRRC28   | 0.17209 | 0.30298 | 0.624 | 0.54 | 1 | HC_vs_MS.Trt_F |
| ATXN7L3B | 0.17214 | 0.39372 | 0.197 | 0.15 | 1 | HC_vs_MS.Trt_F |
| PRAMEF1  | 0.1725  | -0.2683 | 0.075 | 0.11 | 1 | HC_vs_MS.Trt_F |
| DAB2     | 0.17258 | -1.2725 | 0.191 | 0.23 | 1 | HC_vs_MS.Trt_F |
| C1QTNF2  | 0.1727  | 0.31304 | 0.344 | 0.28 | 1 | HC_vs_MS.Trt_F |
| RNF40    | 0.17272 | -0.811  | 0.098 | 0.13 | 1 | HC_vs_MS.Trt_F |
| BRAF     | 0.17292 | 0.33058 | 0.191 | 0.15 | 1 | HC_vs_MS.Trt_F |
| WDR45    | 0.17293 | 0.34908 | 0.647 | 0.58 | 1 | HC_vs_MS.Trt_F |
| ZNF2     | 0.17315 | -1.6707 | 0.382 | 0.31 | 1 | HC_vs_MS.Trt_F |
| MKL2     | 0.17347 | 0.43026 | 0.769 | 0.71 | 1 | HC_vs_MS.Trt_F |
| BCAT2    | 0.17361 | -0.5299 | 0.243 | 0.19 | 1 | HC_vs_MS.Trt_F |
| CBX1     | 0.17374 | -0.2868 | 0.332 | 0.27 | 1 | HC_vs_MS.Trt_F |
| GGCT     | 0.1739  | 1.04675 | 0.11  | 0.08 | 1 | HC_vs_MS.Trt_F |
| CAD      | 0.17394 | 0.7442  | 0.777 | 0.73 | 1 | HC_vs_MS.Trt_F |
| GLUL     | 0.17403 | 0.78359 | 0.263 | 0.21 | 1 | HC_vs_MS.Trt_F |
| CXADR    | 0.17426 | -0.2947 | 0.289 | 0.33 | 1 | HC_vs_MS.Trt_F |
| ZC3H3    | 0.17428 | 0.42946 | 0.153 | 0.12 | 1 | HC_vs_MS.Trt_F |
| RAD21    | 0.17468 | -0.4357 | 0.277 | 0.31 | 1 | HC_vs_MS.Trt_F |
| POLR2A   | 0.17504 | 0.68285 | 0.844 | 0.82 | 1 | HC_vs_MS.Trt_F |
| SERINC5  | 0.17521 | -0.3358 | 0.89  | 0.9  | 1 | HC_vs_MS.Trt_F |
| TBCA     | 0.17566 | 0.26634 | 0.298 | 0.25 | 1 | HC_vs_MS.Trt_F |
| MIB2     | 0.17578 | -0.5551 | 0.202 | 0.25 | 1 | HC_vs_MS.Trt_F |
| RAB27A   | 0.17579 | -0.2554 | 0.673 | 0.6  | 1 | HC_vs_MS.Trt_F |
| LMLN     | 0.17593 | 0.3238  | 0.419 | 0.35 | 1 | HC_vs_MS.Trt_F |
| NLRP3    | 0.1761  | -0.7698 | 0.28  | 0.23 | 1 | HC_vs_MS.Trt_F |
| SEPHS2   | 0.17617 | 0.82433 | 0.145 | 0.11 | 1 | HC_vs_MS.Trt_F |
| RABEPK   | 0.17621 | -0.3368 | 0.85  | 0.8  | 1 | HC_vs_MS.Trt_F |
| SETD4    | 0.17637 | -0.7803 | 0.564 | 0.51 | 1 | HC_vs_MS.Trt_F |
| SLC2A4RG | 0.1764  | 0.74913 | 0.11  | 0.08 | 1 | HC_vs_MS.Trt_F |
| HSD17B13 | 0.17641 | 0.5341  | 0.636 | 0.57 | 1 | HC_vs_MS.Trt_F |

|            |         |         |       |      |   |                |
|------------|---------|---------|-------|------|---|----------------|
| TNS2       | 0.17649 | 1.04923 | 0.39  | 0.34 | 1 | HC_vs_MS.Trt_F |
| LARP7      | 0.17668 | -0.5476 | 0.257 | 0.2  | 1 | HC_vs_MS.Trt_F |
| CTR9       | 0.17671 | -0.4145 | 0.205 | 0.16 | 1 | HC_vs_MS.Trt_F |
| RUVBL1     | 0.17702 | -0.417  | 0.711 | 0.73 | 1 | HC_vs_MS.Trt_F |
| IPO11      | 0.17716 | 0.54332 | 0.173 | 0.13 | 1 | HC_vs_MS.Trt_F |
| DDAH2      | 0.17747 | -0.6416 | 0.118 | 0.08 | 1 | HC_vs_MS.Trt_F |
| ITFG1      | 0.17758 | 0.59875 | 0.211 | 0.17 | 1 | HC_vs_MS.Trt_F |
| RP11-577H5 | 0.1776  | -1.0644 | 0.104 | 0.13 | 1 | HC_vs_MS.Trt_F |
| PAPOLG     | 0.17792 | -0.3545 | 0.827 | 0.73 | 1 | HC_vs_MS.Trt_F |
| BCDIN3D    | 0.17804 | 0.68227 | 0.454 | 0.39 | 1 | HC_vs_MS.Trt_F |
| UBN1       | 0.17813 | -0.5354 | 0.194 | 0.15 | 1 | HC_vs_MS.Trt_F |
| VN1R2      | 0.17816 | 0.31656 | 0.11  | 0.08 | 1 | HC_vs_MS.Trt_F |
| MRPL52     | 0.17841 | -0.2733 | 0.682 | 0.59 | 1 | HC_vs_MS.Trt_F |
| SNUPN      | 0.17854 | -0.845  | 0.887 | 0.79 | 1 | HC_vs_MS.Trt_F |
| RTCA       | 0.1787  | -0.2684 | 0.645 | 0.58 | 1 | HC_vs_MS.Trt_F |
| SLC25A20   | 0.17917 | 0.66736 | 0.171 | 0.13 | 1 | HC_vs_MS.Trt_F |
| ANO8       | 0.17921 | 0.3425  | 0.136 | 0.1  | 1 | HC_vs_MS.Trt_F |
| VGLL4      | 0.17937 | 0.29182 | 0.951 | 0.94 | 1 | HC_vs_MS.Trt_F |
| CERS4      | 0.17938 | 0.57067 | 0.659 | 0.59 | 1 | HC_vs_MS.Trt_F |
| EFCAB5     | 0.17939 | 0.67046 | 0.503 | 0.44 | 1 | HC_vs_MS.Trt_F |
| TACR2      | 0.17945 | 0.59142 | 0.121 | 0.09 | 1 | HC_vs_MS.Trt_F |
| ATG9B      | 0.17948 | -0.7729 | 0.124 | 0.16 | 1 | HC_vs_MS.Trt_F |
| RAD9B      | 0.17979 | 0.28538 | 0.471 | 0.4  | 1 | HC_vs_MS.Trt_F |
| RSBN1      | 0.17979 | 0.30498 | 0.275 | 0.22 | 1 | HC_vs_MS.Trt_F |
| ZNF532     | 0.18016 | 0.26151 | 0.942 | 0.94 | 1 | HC_vs_MS.Trt_F |
| VPS54      | 0.18017 | -1.1392 | 0.419 | 0.36 | 1 | HC_vs_MS.Trt_F |
| PDE7B      | 0.18027 | 0.30801 | 0.448 | 0.41 | 1 | HC_vs_MS.Trt_F |
| KLHL24     | 0.18074 | -0.38   | 0.882 | 0.85 | 1 | HC_vs_MS.Trt_F |
| USP1       | 0.18108 | -0.3629 | 0.197 | 0.15 | 1 | HC_vs_MS.Trt_F |
| RFX5       | 0.18119 | -0.3847 | 0.393 | 0.33 | 1 | HC_vs_MS.Trt_F |
| CYP51A1    | 0.18135 | -0.4182 | 0.532 | 0.46 | 1 | HC_vs_MS.Trt_F |
| ANKHD1     | 0.18142 | 0.28018 | 0.494 | 0.45 | 1 | HC_vs_MS.Trt_F |
| WDR76      | 0.18204 | -0.7836 | 0.656 | 0.69 | 1 | HC_vs_MS.Trt_F |
| LRRC59     | 0.18204 | 0.56457 | 0.176 | 0.14 | 1 | HC_vs_MS.Trt_F |
| UCHL5      | 0.18204 | -0.5312 | 0.223 | 0.17 | 1 | HC_vs_MS.Trt_F |
| AOAH       | 0.18228 | -0.812  | 0.428 | 0.36 | 1 | HC_vs_MS.Trt_F |
| SFXN2      | 0.18249 | 0.84724 | 0.925 | 0.92 | 1 | HC_vs_MS.Trt_F |
| UBA2       | 0.18254 | 0.61269 | 0.624 | 0.57 | 1 | HC_vs_MS.Trt_F |
| GMEB1      | 0.18294 | 0.4761  | 0.821 | 0.79 | 1 | HC_vs_MS.Trt_F |
| PPME1      | 0.18302 | 0.57384 | 0.182 | 0.14 | 1 | HC_vs_MS.Trt_F |

|          |         |         |       |      |   |                |
|----------|---------|---------|-------|------|---|----------------|
| C1orf112 | 0.18306 | -0.4042 | 0.546 | 0.47 | 1 | HC_vs_MS.Trt_F |
| ENPP2    | 0.18358 | 1.3484  | 0.156 | 0.12 | 1 | HC_vs_MS.Trt_F |
| WRN      | 0.18379 | -0.6613 | 0.587 | 0.49 | 1 | HC_vs_MS.Trt_F |
| SURF2    | 0.18392 | -0.6338 | 0.13  | 0.16 | 1 | HC_vs_MS.Trt_F |
| XPO6     | 0.18436 | -0.577  | 0.286 | 0.32 | 1 | HC_vs_MS.Trt_F |
| SCAPER   | 0.18453 | -0.3411 | 0.402 | 0.34 | 1 | HC_vs_MS.Trt_F |
| IBA57    | 0.18491 | 0.56531 | 0.829 | 0.81 | 1 | HC_vs_MS.Trt_F |
| PREPL    | 0.18513 | 0.34559 | 0.708 | 0.65 | 1 | HC_vs_MS.Trt_F |
| PIGL     | 0.18521 | 0.56876 | 0.714 | 0.67 | 1 | HC_vs_MS.Trt_F |
| RRP1     | 0.18529 | -0.5083 | 0.711 | 0.65 | 1 | HC_vs_MS.Trt_F |
| KBTBD3   | 0.18532 | -0.896  | 0.075 | 0.1  | 1 | HC_vs_MS.Trt_F |
| ARPC5    | 0.18577 | -0.4691 | 0.96  | 0.89 | 1 | HC_vs_MS.Trt_F |
| TPX2     | 0.18586 | -0.4032 | 0.286 | 0.23 | 1 | HC_vs_MS.Trt_F |
| AGBL3    | 0.18598 | -0.3685 | 0.28  | 0.23 | 1 | HC_vs_MS.Trt_F |
| MCOLN2   | 0.18643 | 0.25969 | 0.509 | 0.43 | 1 | HC_vs_MS.Trt_F |
| TMEM94   | 0.18677 | -0.4176 | 0.272 | 0.22 | 1 | HC_vs_MS.Trt_F |
| CLN6     | 0.18677 | 0.35356 | 0.824 | 0.79 | 1 | HC_vs_MS.Trt_F |
| TCP11L2  | 0.18702 | 0.42044 | 0.295 | 0.25 | 1 | HC_vs_MS.Trt_F |
| BTNL9    | 0.18716 | 0.39941 | 0.931 | 0.85 | 1 | HC_vs_MS.Trt_F |
| TSPYL1   | 0.1873  | -0.4979 | 0.639 | 0.62 | 1 | HC_vs_MS.Trt_F |
| DENND1A  | 0.18752 | 0.43489 | 0.558 | 0.49 | 1 | HC_vs_MS.Trt_F |
| MKNK1    | 0.18754 | -0.3557 | 0.945 | 0.92 | 1 | HC_vs_MS.Trt_F |
| TRANK1   | 0.18755 | 0.66778 | 0.263 | 0.22 | 1 | HC_vs_MS.Trt_F |
| ZMAT1    | 0.1878  | 0.70822 | 0.39  | 0.34 | 1 | HC_vs_MS.Trt_F |
| DCAF13   | 0.18785 | -0.6036 | 0.766 | 0.66 | 1 | HC_vs_MS.Trt_F |
| TARDBP   | 0.18787 | 0.351   | 0.636 | 0.59 | 1 | HC_vs_MS.Trt_F |
| HSPBAP1  | 0.18855 | 0.30576 | 0.584 | 0.53 | 1 | HC_vs_MS.Trt_F |
| SPAG9    | 0.18909 | 0.57243 | 0.913 | 0.88 | 1 | HC_vs_MS.Trt_F |
| ACVR2A   | 0.18923 | -0.5916 | 0.315 | 0.25 | 1 | HC_vs_MS.Trt_F |
| HHIP     | 0.18961 | 0.33146 | 0.405 | 0.35 | 1 | HC_vs_MS.Trt_F |
| SCUBE3   | 0.18967 | 0.39843 | 0.691 | 0.63 | 1 | HC_vs_MS.Trt_F |
| TLR6     | 0.18989 | -0.3417 | 0.309 | 0.26 | 1 | HC_vs_MS.Trt_F |
| CYB5R2   | 0.18991 | 0.54716 | 0.575 | 0.48 | 1 | HC_vs_MS.Trt_F |
| ENSA     | 0.19    | -0.3088 | 0.821 | 0.82 | 1 | HC_vs_MS.Trt_F |
| NRAS     | 0.1904  | 0.83184 | 0.361 | 0.3  | 1 | HC_vs_MS.Trt_F |
| CD101    | 0.19094 | -0.8835 | 0.075 | 0.1  | 1 | HC_vs_MS.Trt_F |
| NT5DC1   | 0.19129 | 0.77508 | 0.223 | 0.17 | 1 | HC_vs_MS.Trt_F |
| ANO10    | 0.19195 | -0.3913 | 0.671 | 0.62 | 1 | HC_vs_MS.Trt_F |
| WDR53    | 0.19203 | 0.32194 | 0.116 | 0.08 | 1 | HC_vs_MS.Trt_F |
| NCAPH2   | 0.19223 | 0.42274 | 0.757 | 0.71 | 1 | HC_vs_MS.Trt_F |



|         |         |         |       |      |   |                |
|---------|---------|---------|-------|------|---|----------------|
| GPR155  | 0.19257 | 0.36163 | 0.939 | 0.9  | 1 | HC_vs_MS.Trt_F |
| ABCB10  | 0.19263 | -1.057  | 0.101 | 0.13 | 1 | HC_vs_MS.Trt_F |
| PDZD8   | 0.19267 | -0.6863 | 0.277 | 0.32 | 1 | HC_vs_MS.Trt_F |
| FOXK1   | 0.19273 | -0.4798 | 0.879 | 0.85 | 1 | HC_vs_MS.Trt_F |
| PPM1F   | 0.19296 | 0.51914 | 0.832 | 0.76 | 1 | HC_vs_MS.Trt_F |
| ZNF845  | 0.19315 | 0.31153 | 0.711 | 0.65 | 1 | HC_vs_MS.Trt_F |
| HOMEZ   | 0.19345 | -1.3012 | 0.26  | 0.3  | 1 | HC_vs_MS.Trt_F |
| MTR     | 0.1937  | -0.6596 | 0.569 | 0.49 | 1 | HC_vs_MS.Trt_F |
| BLOC1S1 | 0.19372 | -0.3305 | 0.254 | 0.2  | 1 | HC_vs_MS.Trt_F |
| FMNL1   | 0.19372 | 0.42988 | 0.714 | 0.68 | 1 | HC_vs_MS.Trt_F |
| VTI1A   | 0.19389 | -0.3972 | 0.902 | 0.87 | 1 | HC_vs_MS.Trt_F |
| USP46   | 0.1939  | 0.37755 | 0.731 | 0.68 | 1 | HC_vs_MS.Trt_F |
| SPRYD3  | 0.19394 | 0.58053 | 0.197 | 0.16 | 1 | HC_vs_MS.Trt_F |
| ACSL5   | 0.19437 | 0.37905 | 0.225 | 0.18 | 1 | HC_vs_MS.Trt_F |
| TAF10   | 0.19443 | 0.92189 | 0.133 | 0.1  | 1 | HC_vs_MS.Trt_F |
| GPX2    | 0.19446 | 0.8771  | 0.211 | 0.16 | 1 | HC_vs_MS.Trt_F |
| C2CD2   | 0.1948  | 0.69714 | 0.266 | 0.22 | 1 | HC_vs_MS.Trt_F |
| ANKRD39 | 0.19501 | -0.5235 | 0.214 | 0.25 | 1 | HC_vs_MS.Trt_F |
| FAM32A  | 0.19509 | -0.3452 | 0.494 | 0.42 | 1 | HC_vs_MS.Trt_F |
| SPDYE3  | 0.19515 | 0.43002 | 0.506 | 0.59 | 1 | HC_vs_MS.Trt_F |
| RRAGA   | 0.1953  | -0.4056 | 0.185 | 0.14 | 1 | HC_vs_MS.Trt_F |
| GGCX    | 0.19537 | 0.27112 | 0.934 | 0.9  | 1 | HC_vs_MS.Trt_F |
| FGFR1   | 0.19542 | 0.36749 | 0.827 | 0.8  | 1 | HC_vs_MS.Trt_F |
| AHCYL2  | 0.19548 | 1.83426 | 0.194 | 0.16 | 1 | HC_vs_MS.Trt_F |
| IDH3G   | 0.19556 | 0.26349 | 0.197 | 0.16 | 1 | HC_vs_MS.Trt_F |
| ZNF680  | 0.19577 | -0.7523 | 0.139 | 0.17 | 1 | HC_vs_MS.Trt_F |
| BBS1    | 0.19626 | -0.2728 | 0.656 | 0.61 | 1 | HC_vs_MS.Trt_F |
| RAB21   | 0.19628 | 0.40106 | 0.983 | 0.97 | 1 | HC_vs_MS.Trt_F |
| TXLNA   | 0.1963  | -0.5423 | 0.373 | 0.39 | 1 | HC_vs_MS.Trt_F |
| LTB     | 0.19635 | -0.365  | 0.584 | 0.59 | 1 | HC_vs_MS.Trt_F |
| BCOR    | 0.19656 | -0.2768 | 0.217 | 0.17 | 1 | HC_vs_MS.Trt_F |
| MIER1   | 0.19675 | -0.2773 | 0.743 | 0.66 | 1 | HC_vs_MS.Trt_F |
| GPR137  | 0.19677 | -0.2875 | 0.292 | 0.24 | 1 | HC_vs_MS.Trt_F |
| SLC9B1  | 0.19689 | 0.39999 | 0.419 | 0.37 | 1 | HC_vs_MS.Trt_F |
| ESCO1   | 0.19691 | -0.3628 | 0.439 | 0.38 | 1 | HC_vs_MS.Trt_F |
| FSD2    | 0.19691 | 0.52221 | 0.488 | 0.46 | 1 | HC_vs_MS.Trt_F |
| SNRPD3  | 0.19697 | -0.4149 | 0.803 | 0.72 | 1 | HC_vs_MS.Trt_F |
| HBB     | 0.19711 | -4.1882 | 0.075 | 0.1  | 1 | HC_vs_MS.Trt_F |
| DPM1    | 0.19719 | 0.72731 | 0.136 | 0.1  | 1 | HC_vs_MS.Trt_F |
| ABCC2   | 0.19801 | 0.25274 | 0.514 | 0.58 | 1 | HC_vs_MS.Trt_F |

|           |         |         |       |      |   |                |
|-----------|---------|---------|-------|------|---|----------------|
| ITGAX     | 0.19827 | 1.255   | 0.558 | 0.48 | 1 | HC_vs_MS.Trt_F |
| MBD1      | 0.19847 | -0.3058 | 0.217 | 0.17 | 1 | HC_vs_MS.Trt_F |
| ARHGAP4   | 0.19855 | 0.33253 | 0.497 | 0.48 | 1 | HC_vs_MS.Trt_F |
| RNF38     | 0.19874 | 0.3263  | 0.237 | 0.19 | 1 | HC_vs_MS.Trt_F |
| VHL       | 0.19905 | -0.2711 | 0.815 | 0.75 | 1 | HC_vs_MS.Trt_F |
| KDEL2     | 0.19908 | -0.318  | 0.208 | 0.16 | 1 | HC_vs_MS.Trt_F |
| PITPNA    | 0.19919 | 1.13612 | 0.13  | 0.1  | 1 | HC_vs_MS.Trt_F |
| ZNF250    | 0.19931 | -1.2683 | 0.671 | 0.59 | 1 | HC_vs_MS.Trt_F |
| DPAGT1    | 0.19948 | -0.3877 | 0.084 | 0.11 | 1 | HC_vs_MS.Trt_F |
| CIAO1     | 0.19957 | -0.3878 | 0.355 | 0.29 | 1 | HC_vs_MS.Trt_F |
| RAP2C     | 0.19962 | -0.2669 | 0.324 | 0.26 | 1 | HC_vs_MS.Trt_F |
| MAP3K13   | 0.19969 | 0.39595 | 0.85  | 0.82 | 1 | HC_vs_MS.Trt_F |
| RBM44     | 0.19989 | -0.724  | 0.231 | 0.27 | 1 | HC_vs_MS.Trt_F |
| CSGALNACT | 0.20042 | 0.39467 | 0.191 | 0.15 | 1 | HC_vs_MS.Trt_F |
| E2F6      | 0.20045 | 0.69012 | 0.272 | 0.31 | 1 | HC_vs_MS.Trt_F |
| FYTTD1    | 0.20064 | -0.5696 | 0.838 | 0.76 | 1 | HC_vs_MS.Trt_F |
| FCGRT     | 0.20082 | 0.39189 | 0.237 | 0.19 | 1 | HC_vs_MS.Trt_F |
| BPNT1     | 0.20104 | -0.4903 | 0.775 | 0.68 | 1 | HC_vs_MS.Trt_F |
| NCAPD3    | 0.20106 | 1.7522  | 0.11  | 0.08 | 1 | HC_vs_MS.Trt_F |
| DCUN1D4   | 0.20111 | -0.3195 | 0.35  | 0.29 | 1 | HC_vs_MS.Trt_F |
| SLC35G2   | 0.20146 | -0.861  | 0.185 | 0.22 | 1 | HC_vs_MS.Trt_F |
| NAXD      | 0.20154 | -1.13   | 0.087 | 0.12 | 1 | HC_vs_MS.Trt_F |
| CENPM     | 0.20166 | -0.7078 | 0.382 | 0.31 | 1 | HC_vs_MS.Trt_F |
| SPAG4     | 0.20182 | 0.55498 | 0.28  | 0.25 | 1 | HC_vs_MS.Trt_F |
| TMEM256-P | 0.20186 | -0.3722 | 0.48  | 0.49 | 1 | HC_vs_MS.Trt_F |
| 5-Mar     | 0.20193 | 0.38478 | 0.251 | 0.21 | 1 | HC_vs_MS.Trt_F |
| MYO1D     | 0.2021  | 1.51714 | 0.202 | 0.17 | 1 | HC_vs_MS.Trt_F |
| ZNF85     | 0.20211 | -0.8036 | 0.72  | 0.65 | 1 | HC_vs_MS.Trt_F |
| MRPS2     | 0.20221 | 0.97845 | 0.101 | 0.07 | 1 | HC_vs_MS.Trt_F |
| BRF1      | 0.20244 | 0.63774 | 0.624 | 0.59 | 1 | HC_vs_MS.Trt_F |
| ANKZF1    | 0.20278 | 0.33789 | 0.835 | 0.82 | 1 | HC_vs_MS.Trt_F |
| HECTD1    | 0.20291 | 0.32687 | 0.587 | 0.52 | 1 | HC_vs_MS.Trt_F |
| KIF9      | 0.20301 | 0.51902 | 0.173 | 0.14 | 1 | HC_vs_MS.Trt_F |
| PLEKHG2   | 0.20312 | 0.52162 | 0.916 | 0.86 | 1 | HC_vs_MS.Trt_F |
| SPATA7    | 0.20317 | -0.2566 | 0.341 | 0.3  | 1 | HC_vs_MS.Trt_F |
| SS18      | 0.20324 | -0.3883 | 0.647 | 0.56 | 1 | HC_vs_MS.Trt_F |
| FNIP1     | 0.20325 | -0.443  | 0.587 | 0.63 | 1 | HC_vs_MS.Trt_F |
| WDR45B    | 0.2033  | 0.2596  | 0.422 | 0.38 | 1 | HC_vs_MS.Trt_F |
| MYO15B    | 0.20334 | 0.27803 | 0.246 | 0.2  | 1 | HC_vs_MS.Trt_F |
| VAPB      | 0.20381 | -0.8187 | 0.217 | 0.17 | 1 | HC_vs_MS.Trt_F |

|         |         |         |       |      |   |                |
|---------|---------|---------|-------|------|---|----------------|
| SUPT6H  | 0.20394 | 0.37165 | 0.679 | 0.62 | 1 | HC_vs_MS.Trt_F |
| PSMG3   | 0.20416 | -0.9204 | 0.682 | 0.59 | 1 | HC_vs_MS.Trt_F |
| CEACAM4 | 0.20457 | 0.62037 | 0.136 | 0.1  | 1 | HC_vs_MS.Trt_F |
| LYRM1   | 0.20483 | -0.6316 | 0.616 | 0.53 | 1 | HC_vs_MS.Trt_F |
| MYOM3   | 0.20504 | 0.26071 | 0.633 | 0.6  | 1 | HC_vs_MS.Trt_F |
| TGFBR1  | 0.20513 | -0.3345 | 0.162 | 0.12 | 1 | HC_vs_MS.Trt_F |
| VNN2    | 0.20544 | -0.8484 | 0.188 | 0.22 | 1 | HC_vs_MS.Trt_F |
| ZBTB1   | 0.20568 | -0.2792 | 0.231 | 0.18 | 1 | HC_vs_MS.Trt_F |
| ERLEC1  | 0.20581 | 0.54881 | 0.413 | 0.36 | 1 | HC_vs_MS.Trt_F |
| GHDC    | 0.20589 | -0.8408 | 0.335 | 0.28 | 1 | HC_vs_MS.Trt_F |
| NBPF12  | 0.2059  | -0.3142 | 0.347 | 0.37 | 1 | HC_vs_MS.Trt_F |
| SHANK1  | 0.20639 | 0.40824 | 0.329 | 0.3  | 1 | HC_vs_MS.Trt_F |
| AAMP    | 0.20639 | -0.5575 | 0.234 | 0.18 | 1 | HC_vs_MS.Trt_F |
| KCNN3   | 0.20649 | -0.4841 | 0.474 | 0.5  | 1 | HC_vs_MS.Trt_F |
| PAQR8   | 0.20651 | -0.4664 | 0.607 | 0.51 | 1 | HC_vs_MS.Trt_F |
| LARP1B  | 0.20669 | -1.5974 | 0.075 | 0.1  | 1 | HC_vs_MS.Trt_F |
| DCBLD1  | 0.20676 | 0.58022 | 0.61  | 0.54 | 1 | HC_vs_MS.Trt_F |
| LPAR2   | 0.20677 | -0.5352 | 0.165 | 0.13 | 1 | HC_vs_MS.Trt_F |
| NFXL1   | 0.20682 | 1.23986 | 0.145 | 0.11 | 1 | HC_vs_MS.Trt_F |
| TARS2   | 0.20688 | 0.27453 | 0.809 | 0.81 | 1 | HC_vs_MS.Trt_F |
| NEUROD1 | 0.20721 | 0.27832 | 0.113 | 0.08 | 1 | HC_vs_MS.Trt_F |
| TIMD4   | 0.20735 | 0.65753 | 0.101 | 0.07 | 1 | HC_vs_MS.Trt_F |
| DNAJB4  | 0.20736 | -0.2569 | 0.454 | 0.4  | 1 | HC_vs_MS.Trt_F |
| NFATC2  | 0.20751 | 0.32212 | 0.234 | 0.19 | 1 | HC_vs_MS.Trt_F |
| GFOD2   | 0.20782 | -0.2836 | 0.931 | 0.89 | 1 | HC_vs_MS.Trt_F |
| SMARCD2 | 0.20825 | -0.8397 | 0.118 | 0.15 | 1 | HC_vs_MS.Trt_F |
| ASRGL1  | 0.20864 | 0.40288 | 0.607 | 0.54 | 1 | HC_vs_MS.Trt_F |
| KLLN    | 0.20867 | -0.4036 | 0.497 | 0.43 | 1 | HC_vs_MS.Trt_F |
| WDR5B   | 0.20898 | 1.21871 | 0.24  | 0.19 | 1 | HC_vs_MS.Trt_F |
| TPRG1L  | 0.20907 | 0.82613 | 0.298 | 0.26 | 1 | HC_vs_MS.Trt_F |
| PES1    | 0.20911 | 0.91136 | 0.142 | 0.11 | 1 | HC_vs_MS.Trt_F |
| GTF2H3  | 0.20913 | -0.6295 | 0.786 | 0.69 | 1 | HC_vs_MS.Trt_F |
| SRM     | 0.20931 | -0.4227 | 0.199 | 0.16 | 1 | HC_vs_MS.Trt_F |
| NDC80   | 0.20954 | -0.7962 | 0.743 | 0.66 | 1 | HC_vs_MS.Trt_F |
| RPRD2   | 0.2096  | 0.29539 | 0.277 | 0.23 | 1 | HC_vs_MS.Trt_F |
| MAEL    | 0.20979 | 0.29291 | 0.529 | 0.57 | 1 | HC_vs_MS.Trt_F |
| PDXK    | 0.20992 | 0.2834  | 0.63  | 0.53 | 1 | HC_vs_MS.Trt_F |
| SP4     | 0.20996 | -0.5341 | 0.448 | 0.38 | 1 | HC_vs_MS.Trt_F |
| STK24   | 0.21013 | -0.59   | 0.347 | 0.29 | 1 | HC_vs_MS.Trt_F |
| ANKRD40 | 0.21028 | -0.7722 | 0.824 | 0.82 | 1 | HC_vs_MS.Trt_F |

|         |         |         |       |      |   |                |
|---------|---------|---------|-------|------|---|----------------|
| MAP3K14 | 0.21043 | 0.28527 | 0.199 | 0.16 | 1 | HC_vs_MS.Trt_F |
| VAMP7   | 0.2105  | -0.5562 | 0.127 | 0.09 | 1 | HC_vs_MS.Trt_F |
| LRP2BP  | 0.21058 | 0.99001 | 0.48  | 0.42 | 1 | HC_vs_MS.Trt_F |
| NOTCH1  | 0.21062 | 0.95001 | 0.156 | 0.12 | 1 | HC_vs_MS.Trt_F |
| GPA33   | 0.21136 | 0.93019 | 0.101 | 0.07 | 1 | HC_vs_MS.Trt_F |
| RPAP1   | 0.21136 | -0.4565 | 0.855 | 0.77 | 1 | HC_vs_MS.Trt_F |
| ZNF496  | 0.21152 | 0.66752 | 0.769 | 0.72 | 1 | HC_vs_MS.Trt_F |
| C3orf58 | 0.21153 | -1.0851 | 0.104 | 0.13 | 1 | HC_vs_MS.Trt_F |
| ZNF268  | 0.21155 | 0.37795 | 0.986 | 0.95 | 1 | HC_vs_MS.Trt_F |
| LANCL1  | 0.21155 | -0.2573 | 0.179 | 0.14 | 1 | HC_vs_MS.Trt_F |
| CREBRF  | 0.21163 | -0.4991 | 0.777 | 0.69 | 1 | HC_vs_MS.Trt_F |
| ZNF783  | 0.2119  | 1.10113 | 0.442 | 0.38 | 1 | HC_vs_MS.Trt_F |
| PBX3    | 0.21202 | 0.61978 | 0.116 | 0.09 | 1 | HC_vs_MS.Trt_F |
| ATP6AP2 | 0.2124  | -0.3202 | 0.89  | 0.81 | 1 | HC_vs_MS.Trt_F |
| TCF3    | 0.21253 | 0.79419 | 0.11  | 0.08 | 1 | HC_vs_MS.Trt_F |
| CEP250  | 0.21282 | -0.7153 | 0.844 | 0.78 | 1 | HC_vs_MS.Trt_F |
| NAIP    | 0.21284 | -0.3011 | 0.743 | 0.63 | 1 | HC_vs_MS.Trt_F |
| PTPRJ   | 0.21292 | 0.32296 | 0.41  | 0.37 | 1 | HC_vs_MS.Trt_F |
| TEPSIN  | 0.21297 | 0.67236 | 0.15  | 0.12 | 1 | HC_vs_MS.Trt_F |
| ZDHHC5  | 0.21321 | 0.75781 | 0.142 | 0.11 | 1 | HC_vs_MS.Trt_F |
| ESRRA   | 0.21332 | 1.00579 | 0.127 | 0.1  | 1 | HC_vs_MS.Trt_F |
| INSL6   | 0.21343 | 0.37471 | 0.338 | 0.3  | 1 | HC_vs_MS.Trt_F |
| ZNF461  | 0.21376 | -0.7103 | 0.705 | 0.66 | 1 | HC_vs_MS.Trt_F |
| MCEE    | 0.21388 | 0.37954 | 0.214 | 0.18 | 1 | HC_vs_MS.Trt_F |
| GPATCH2 | 0.21397 | -0.816  | 0.54  | 0.6  | 1 | HC_vs_MS.Trt_F |
| OLA1    | 0.21426 | -0.2707 | 0.494 | 0.42 | 1 | HC_vs_MS.Trt_F |
| SLC7A13 | 0.2143  | -0.436  | 0.121 | 0.16 | 1 | HC_vs_MS.Trt_F |
| NARF    | 0.2145  | 0.46675 | 0.965 | 0.95 | 1 | HC_vs_MS.Trt_F |
| CTRL    | 0.21486 | -0.3033 | 0.133 | 0.1  | 1 | HC_vs_MS.Trt_F |
| COP55   | 0.21491 | 0.38708 | 0.893 | 0.82 | 1 | HC_vs_MS.Trt_F |
| WDR11   | 0.21509 | 0.6387  | 0.673 | 0.62 | 1 | HC_vs_MS.Trt_F |
| TTC22   | 0.21511 | 0.75598 | 0.494 | 0.43 | 1 | HC_vs_MS.Trt_F |
| DEPDC5  | 0.21517 | -0.4678 | 0.777 | 0.81 | 1 | HC_vs_MS.Trt_F |
| BICD1   | 0.21521 | 0.59385 | 0.118 | 0.09 | 1 | HC_vs_MS.Trt_F |
| CASP2   | 0.21562 | -0.4446 | 0.818 | 0.81 | 1 | HC_vs_MS.Trt_F |
| DMXL1   | 0.2157  | -0.3498 | 0.24  | 0.19 | 1 | HC_vs_MS.Trt_F |
| BRD3    | 0.21625 | -0.4599 | 0.237 | 0.18 | 1 | HC_vs_MS.Trt_F |
| AIDA    | 0.21627 | 0.50385 | 0.139 | 0.1  | 1 | HC_vs_MS.Trt_F |
| ITGB8   | 0.21642 | 0.40849 | 0.78  | 0.81 | 1 | HC_vs_MS.Trt_F |
| ZFP91   | 0.21658 | 0.4313  | 0.104 | 0.08 | 1 | HC_vs_MS.Trt_F |

|            |         |         |       |      |   |                |
|------------|---------|---------|-------|------|---|----------------|
| C1QTNF1    | 0.21761 | -0.5423 | 0.275 | 0.22 | 1 | HC_vs_MS.Trt_F |
| KIFAP3     | 0.21765 | -0.3988 | 0.188 | 0.15 | 1 | HC_vs_MS.Trt_F |
| GNB2       | 0.21781 | 0.70028 | 0.529 | 0.5  | 1 | HC_vs_MS.Trt_F |
| LGR4       | 0.21797 | 0.8129  | 0.075 | 0.1  | 1 | HC_vs_MS.Trt_F |
| BRI3BP     | 0.21827 | 0.26045 | 0.902 | 0.87 | 1 | HC_vs_MS.Trt_F |
| MUM1       | 0.2186  | -0.4506 | 0.685 | 0.63 | 1 | HC_vs_MS.Trt_F |
| ARRDC3     | 0.21863 | -0.5458 | 0.454 | 0.48 | 1 | HC_vs_MS.Trt_F |
| LIMD1      | 0.21883 | 0.32269 | 0.879 | 0.83 | 1 | HC_vs_MS.Trt_F |
| FOXP4      | 0.21891 | 0.52882 | 0.422 | 0.36 | 1 | HC_vs_MS.Trt_F |
| RAD9A      | 0.21892 | 0.29303 | 0.529 | 0.47 | 1 | HC_vs_MS.Trt_F |
| ENDOV      | 0.21909 | 0.43493 | 0.659 | 0.6  | 1 | HC_vs_MS.Trt_F |
| B4GALT5    | 0.21919 | 0.53887 | 0.286 | 0.34 | 1 | HC_vs_MS.Trt_F |
| MPST       | 0.21943 | -0.4782 | 0.887 | 0.82 | 1 | HC_vs_MS.Trt_F |
| PTCD3      | 0.2195  | -0.2922 | 0.922 | 0.9  | 1 | HC_vs_MS.Trt_F |
| BLOC1S4    | 0.21961 | 0.36013 | 0.171 | 0.21 | 1 | HC_vs_MS.Trt_F |
| CSF2RB     | 0.21997 | 0.63337 | 0.124 | 0.09 | 1 | HC_vs_MS.Trt_F |
| CASC4      | 0.22009 | 0.38188 | 0.867 | 0.88 | 1 | HC_vs_MS.Trt_F |
| VPS33B     | 0.22014 | 1.09327 | 0.416 | 0.48 | 1 | HC_vs_MS.Trt_F |
| SIK3       | 0.22044 | 0.34127 | 0.367 | 0.31 | 1 | HC_vs_MS.Trt_F |
| POP4       | 0.22104 | -0.332  | 0.168 | 0.13 | 1 | HC_vs_MS.Trt_F |
| ACPP       | 0.22111 | 0.3301  | 0.225 | 0.19 | 1 | HC_vs_MS.Trt_F |
| FBLN1      | 0.22145 | 0.59058 | 0.188 | 0.15 | 1 | HC_vs_MS.Trt_F |
| AKR1C1     | 0.2216  | 0.41951 | 0.306 | 0.27 | 1 | HC_vs_MS.Trt_F |
| LAPTM4B    | 0.22163 | 1.43827 | 0.225 | 0.18 | 1 | HC_vs_MS.Trt_F |
| TMEM120A   | 0.22175 | -0.3144 | 0.179 | 0.14 | 1 | HC_vs_MS.Trt_F |
| MUTYH      | 0.2218  | 0.55588 | 0.561 | 0.51 | 1 | HC_vs_MS.Trt_F |
| FZR1       | 0.22183 | 0.58276 | 0.168 | 0.13 | 1 | HC_vs_MS.Trt_F |
| CTB-133G6. | 0.22184 | -0.6149 | 0.194 | 0.22 | 1 | HC_vs_MS.Trt_F |
| OTULIN     | 0.22207 | 0.51065 | 0.497 | 0.44 | 1 | HC_vs_MS.Trt_F |
| STARD4     | 0.22231 | -0.9553 | 0.211 | 0.17 | 1 | HC_vs_MS.Trt_F |
| POLR2E     | 0.22246 | -0.5782 | 0.564 | 0.58 | 1 | HC_vs_MS.Trt_F |
| ZNF584     | 0.22253 | 0.67282 | 0.746 | 0.69 | 1 | HC_vs_MS.Trt_F |
| SERTAD1    | 0.22261 | -0.2916 | 0.442 | 0.37 | 1 | HC_vs_MS.Trt_F |
| RNF141     | 0.22293 | 0.46091 | 0.445 | 0.4  | 1 | HC_vs_MS.Trt_F |
| LHPP       | 0.22327 | 0.65509 | 0.15  | 0.12 | 1 | HC_vs_MS.Trt_F |
| GCA        | 0.22342 | -0.8181 | 0.095 | 0.12 | 1 | HC_vs_MS.Trt_F |
| TAB1       | 0.22348 | 0.34719 | 0.121 | 0.09 | 1 | HC_vs_MS.Trt_F |
| THNSL1     | 0.2235  | -1.7367 | 0.153 | 0.12 | 1 | HC_vs_MS.Trt_F |
| HIPK2      | 0.22355 | -0.2906 | 0.13  | 0.09 | 1 | HC_vs_MS.Trt_F |
| TMEM164    | 0.22361 | 0.27037 | 0.107 | 0.08 | 1 | HC_vs_MS.Trt_F |

|          |         |         |       |      |   |                |
|----------|---------|---------|-------|------|---|----------------|
| FCGR2B   | 0.22401 | 0.915   | 0.075 | 0.1  | 1 | HC_vs_MS.Trt_F |
| COL15A1  | 0.22414 | 0.84246 | 0.425 | 0.36 | 1 | HC_vs_MS.Trt_F |
| TAPBP    | 0.22424 | -0.2652 | 0.974 | 0.94 | 1 | HC_vs_MS.Trt_F |
| ALG12    | 0.2244  | 0.551   | 0.197 | 0.16 | 1 | HC_vs_MS.Trt_F |
| APPBP2   | 0.22441 | -0.4508 | 0.873 | 0.83 | 1 | HC_vs_MS.Trt_F |
| TMEM181  | 0.22444 | 0.30287 | 0.535 | 0.49 | 1 | HC_vs_MS.Trt_F |
| PLEKHG6  | 0.22524 | 0.35584 | 0.303 | 0.25 | 1 | HC_vs_MS.Trt_F |
| FBXO21   | 0.22541 | -0.3401 | 0.217 | 0.17 | 1 | HC_vs_MS.Trt_F |
| SIPA1L1  | 0.22549 | -0.4948 | 0.581 | 0.58 | 1 | HC_vs_MS.Trt_F |
| SPATA20  | 0.22573 | 0.96662 | 0.124 | 0.09 | 1 | HC_vs_MS.Trt_F |
| TRIM61   | 0.22576 | 0.50889 | 0.277 | 0.23 | 1 | HC_vs_MS.Trt_F |
| DLK2     | 0.22605 | -0.6518 | 0.332 | 0.36 | 1 | HC_vs_MS.Trt_F |
| PYCARD   | 0.22613 | -0.9227 | 0.107 | 0.13 | 1 | HC_vs_MS.Trt_F |
| DCTN5    | 0.22637 | 0.36947 | 0.858 | 0.79 | 1 | HC_vs_MS.Trt_F |
| BRAT1    | 0.22641 | -0.274  | 0.338 | 0.29 | 1 | HC_vs_MS.Trt_F |
| TCAF1    | 0.2268  | 1.01273 | 0.387 | 0.34 | 1 | HC_vs_MS.Trt_F |
| GALE     | 0.22689 | 0.32022 | 0.405 | 0.34 | 1 | HC_vs_MS.Trt_F |
| SFMBT2   | 0.22766 | 1.15415 | 0.379 | 0.34 | 1 | HC_vs_MS.Trt_F |
| CHML     | 0.22771 | -1.1089 | 0.26  | 0.21 | 1 | HC_vs_MS.Trt_F |
| XPO4     | 0.22773 | -0.4326 | 0.147 | 0.11 | 1 | HC_vs_MS.Trt_F |
| AANAT    | 0.22779 | 0.26379 | 0.101 | 0.13 | 1 | HC_vs_MS.Trt_F |
| ATP5S    | 0.22782 | -0.6044 | 0.945 | 0.91 | 1 | HC_vs_MS.Trt_F |
| MMP25    | 0.22815 | 0.31526 | 0.197 | 0.16 | 1 | HC_vs_MS.Trt_F |
| UBQLN1   | 0.22848 | -0.4654 | 0.306 | 0.26 | 1 | HC_vs_MS.Trt_F |
| WEE1     | 0.22907 | -0.6788 | 0.769 | 0.69 | 1 | HC_vs_MS.Trt_F |
| CHST11   | 0.22925 | -0.3733 | 0.237 | 0.19 | 1 | HC_vs_MS.Trt_F |
| DIP2C    | 0.22944 | 1.09754 | 0.116 | 0.09 | 1 | HC_vs_MS.Trt_F |
| ATXN1L   | 0.22956 | 1.15495 | 0.127 | 0.1  | 1 | HC_vs_MS.Trt_F |
| SPPL2B   | 0.22985 | 0.28143 | 0.416 | 0.37 | 1 | HC_vs_MS.Trt_F |
| SNIP1    | 0.23077 | -0.502  | 0.705 | 0.62 | 1 | HC_vs_MS.Trt_F |
| MDM2     | 0.23085 | -0.5127 | 0.988 | 0.99 | 1 | HC_vs_MS.Trt_F |
| SPATA33  | 0.23096 | 0.27815 | 0.668 | 0.59 | 1 | HC_vs_MS.Trt_F |
| SEC61A1  | 0.23104 | -0.6136 | 0.364 | 0.4  | 1 | HC_vs_MS.Trt_F |
| HCFC1R1  | 0.23144 | -0.3539 | 0.15  | 0.12 | 1 | HC_vs_MS.Trt_F |
| WDR20    | 0.23176 | -0.2959 | 0.517 | 0.43 | 1 | HC_vs_MS.Trt_F |
| MTCH2    | 0.23228 | 0.30322 | 0.124 | 0.09 | 1 | HC_vs_MS.Trt_F |
| C14orf93 | 0.23234 | -0.9888 | 0.335 | 0.28 | 1 | HC_vs_MS.Trt_F |
| NDUFAF6  | 0.23237 | -0.4208 | 0.662 | 0.59 | 1 | HC_vs_MS.Trt_F |
| ICK      | 0.23266 | 0.723   | 0.246 | 0.2  | 1 | HC_vs_MS.Trt_F |
| ZNF511   | 0.2327  | -0.5104 | 0.092 | 0.12 | 1 | HC_vs_MS.Trt_F |

|          |         |         |       |      |   |                |
|----------|---------|---------|-------|------|---|----------------|
| DLC1     | 0.23344 | 0.55162 | 0.202 | 0.17 | 1 | HC_vs_MS.Trt_F |
| TBC1D22A | 0.23345 | 0.29518 | 0.572 | 0.53 | 1 | HC_vs_MS.Trt_F |
| TMEM214  | 0.23356 | -0.7667 | 0.095 | 0.12 | 1 | HC_vs_MS.Trt_F |
| ZFP64    | 0.23398 | -0.4354 | 0.633 | 0.68 | 1 | HC_vs_MS.Trt_F |
| SEC14L4  | 0.23401 | 0.49154 | 0.613 | 0.56 | 1 | HC_vs_MS.Trt_F |
| GPC2     | 0.23403 | 0.32256 | 0.523 | 0.46 | 1 | HC_vs_MS.Trt_F |
| FAM63A   | 0.2341  | 0.67167 | 0.581 | 0.55 | 1 | HC_vs_MS.Trt_F |
| CCDC28B  | 0.23453 | -0.391  | 0.483 | 0.39 | 1 | HC_vs_MS.Trt_F |
| MYH11    | 0.23462 | 0.37842 | 0.942 | 0.94 | 1 | HC_vs_MS.Trt_F |
| GTSF1    | 0.23465 | -0.6163 | 0.324 | 0.27 | 1 | HC_vs_MS.Trt_F |
| SLC2A6   | 0.23475 | 1.50203 | 0.254 | 0.22 | 1 | HC_vs_MS.Trt_F |
| TMED8    | 0.23477 | 0.40533 | 0.642 | 0.6  | 1 | HC_vs_MS.Trt_F |
| HTN3     | 0.23507 | 0.28751 | 0.659 | 0.61 | 1 | HC_vs_MS.Trt_F |
| EPHB6    | 0.23541 | 0.36615 | 0.133 | 0.1  | 1 | HC_vs_MS.Trt_F |
| ASUN     | 0.23558 | 0.32872 | 0.162 | 0.13 | 1 | HC_vs_MS.Trt_F |
| TSC22D4  | 0.23566 | 0.47491 | 0.303 | 0.27 | 1 | HC_vs_MS.Trt_F |
| PRELID2  | 0.23569 | 0.59949 | 0.572 | 0.49 | 1 | HC_vs_MS.Trt_F |
| RELN     | 0.23588 | 0.27858 | 0.156 | 0.13 | 1 | HC_vs_MS.Trt_F |
| LMBR1L   | 0.23626 | 0.32459 | 0.772 | 0.71 | 1 | HC_vs_MS.Trt_F |
| CCNK     | 0.23631 | 0.43765 | 0.298 | 0.26 | 1 | HC_vs_MS.Trt_F |
| SMU1     | 0.23648 | -0.4424 | 0.786 | 0.77 | 1 | HC_vs_MS.Trt_F |
| SLA2     | 0.23688 | -0.3596 | 0.572 | 0.6  | 1 | HC_vs_MS.Trt_F |
| THAP5    | 0.23701 | -0.7621 | 0.934 | 0.9  | 1 | HC_vs_MS.Trt_F |
| UBN2     | 0.2371  | -0.665  | 0.708 | 0.63 | 1 | HC_vs_MS.Trt_F |
| AHRR     | 0.23721 | 0.30604 | 0.136 | 0.17 | 1 | HC_vs_MS.Trt_F |
| C1orf52  | 0.23735 | 0.91123 | 0.35  | 0.3  | 1 | HC_vs_MS.Trt_F |
| OXCT1    | 0.23738 | 0.4388  | 0.408 | 0.36 | 1 | HC_vs_MS.Trt_F |
| MYLIP    | 0.23742 | -0.6086 | 0.139 | 0.1  | 1 | HC_vs_MS.Trt_F |
| SOCS2    | 0.23767 | -0.2585 | 0.52  | 0.47 | 1 | HC_vs_MS.Trt_F |
| CISD1    | 0.23773 | -0.2812 | 0.124 | 0.09 | 1 | HC_vs_MS.Trt_F |
| TRA2A    | 0.23824 | -0.4982 | 0.772 | 0.74 | 1 | HC_vs_MS.Trt_F |
| ZNF280B  | 0.23831 | 0.62731 | 0.139 | 0.11 | 1 | HC_vs_MS.Trt_F |
| FBXO44   | 0.23839 | -0.3676 | 0.676 | 0.63 | 1 | HC_vs_MS.Trt_F |
| ID3      | 0.23844 | -0.5002 | 0.237 | 0.18 | 1 | HC_vs_MS.Trt_F |
| COX6A1   | 0.23906 | -0.5886 | 0.133 | 0.16 | 1 | HC_vs_MS.Trt_F |
| SLC44A2  | 0.23915 | -0.4122 | 0.728 | 0.74 | 1 | HC_vs_MS.Trt_F |
| BEND7    | 0.23916 | -0.3041 | 0.408 | 0.36 | 1 | HC_vs_MS.Trt_F |
| GMPS     | 0.23998 | -0.3941 | 0.905 | 0.84 | 1 | HC_vs_MS.Trt_F |
| SLC35E2B | 0.24017 | 0.36786 | 0.616 | 0.55 | 1 | HC_vs_MS.Trt_F |
| PSMB3    | 0.2402  | -0.3418 | 0.269 | 0.3  | 1 | HC_vs_MS.Trt_F |

|          |         |         |       |      |   |                |
|----------|---------|---------|-------|------|---|----------------|
| GOLGA8N  | 0.24057 | -0.4234 | 0.101 | 0.08 | 1 | HC_vs_MS.Trt_F |
| PRMT3    | 0.24063 | -0.4657 | 0.358 | 0.3  | 1 | HC_vs_MS.Trt_F |
| TSTA3    | 0.24091 | -0.2938 | 0.205 | 0.16 | 1 | HC_vs_MS.Trt_F |
| DCK      | 0.24115 | -0.2982 | 0.341 | 0.28 | 1 | HC_vs_MS.Trt_F |
| BMP8A    | 0.24138 | 0.88787 | 0.668 | 0.6  | 1 | HC_vs_MS.Trt_F |
| RPS17    | 0.2414  | -0.4969 | 0.474 | 0.42 | 1 | HC_vs_MS.Trt_F |
| PAIP2B   | 0.24169 | 0.76282 | 0.254 | 0.21 | 1 | HC_vs_MS.Trt_F |
| ZNF662   | 0.2417  | -1.0104 | 0.595 | 0.58 | 1 | HC_vs_MS.Trt_F |
| MAP7D3   | 0.24174 | -0.3175 | 0.662 | 0.6  | 1 | HC_vs_MS.Trt_F |
| PRKAB1   | 0.24174 | 0.34619 | 0.818 | 0.79 | 1 | HC_vs_MS.Trt_F |
| STT3A    | 0.24192 | -0.8078 | 0.61  | 0.61 | 1 | HC_vs_MS.Trt_F |
| UBXN7    | 0.24225 | 0.73481 | 0.795 | 0.78 | 1 | HC_vs_MS.Trt_F |
| CD34     | 0.24226 | 0.34715 | 0.665 | 0.6  | 1 | HC_vs_MS.Trt_F |
| MRPS10   | 0.24232 | 0.53856 | 0.538 | 0.5  | 1 | HC_vs_MS.Trt_F |
| PHF14    | 0.24234 | 0.82099 | 0.15  | 0.12 | 1 | HC_vs_MS.Trt_F |
| PARL     | 0.2424  | -0.2701 | 0.162 | 0.13 | 1 | HC_vs_MS.Trt_F |
| MDFIC    | 0.24281 | 0.6338  | 0.408 | 0.36 | 1 | HC_vs_MS.Trt_F |
| ZBTB17   | 0.24286 | 0.33141 | 0.124 | 0.09 | 1 | HC_vs_MS.Trt_F |
| RRN3     | 0.2429  | -0.4403 | 0.306 | 0.26 | 1 | HC_vs_MS.Trt_F |
| CHD1L    | 0.24307 | -0.3679 | 0.113 | 0.14 | 1 | HC_vs_MS.Trt_F |
| BCL2L11  | 0.24354 | -0.3279 | 0.549 | 0.5  | 1 | HC_vs_MS.Trt_F |
| VAMP8    | 0.24357 | -0.5023 | 0.298 | 0.32 | 1 | HC_vs_MS.Trt_F |
| MOCOS    | 0.24432 | 0.46293 | 0.656 | 0.59 | 1 | HC_vs_MS.Trt_F |
| PANK4    | 0.24455 | 0.6964  | 0.107 | 0.08 | 1 | HC_vs_MS.Trt_F |
| CDIP1    | 0.24463 | -0.5934 | 0.223 | 0.26 | 1 | HC_vs_MS.Trt_F |
| INTS10   | 0.24464 | -0.256  | 0.613 | 0.54 | 1 | HC_vs_MS.Trt_F |
| SLC25A30 | 0.24473 | 0.33154 | 0.705 | 0.64 | 1 | HC_vs_MS.Trt_F |
| HEATR5A  | 0.24491 | 0.27745 | 0.763 | 0.67 | 1 | HC_vs_MS.Trt_F |
| ZNF547   | 0.24492 | -0.6698 | 0.266 | 0.3  | 1 | HC_vs_MS.Trt_F |
| CCDC97   | 0.24516 | 0.3581  | 0.185 | 0.15 | 1 | HC_vs_MS.Trt_F |
| RYR3     | 0.24538 | -0.6612 | 0.532 | 0.48 | 1 | HC_vs_MS.Trt_F |
| FBXO36   | 0.2454  | 0.26189 | 0.691 | 0.69 | 1 | HC_vs_MS.Trt_F |
| CHI3L2   | 0.24547 | -1.0146 | 0.272 | 0.22 | 1 | HC_vs_MS.Trt_F |
| HSPH1    | 0.24593 | 0.27369 | 0.257 | 0.21 | 1 | HC_vs_MS.Trt_F |
| HMCES    | 0.24598 | 0.59505 | 0.136 | 0.1  | 1 | HC_vs_MS.Trt_F |
| PCOLCE   | 0.24623 | 1.25866 | 0.133 | 0.1  | 1 | HC_vs_MS.Trt_F |
| TOR4A    | 0.24652 | 0.43493 | 0.254 | 0.22 | 1 | HC_vs_MS.Trt_F |
| FOXN2    | 0.24653 | -0.3201 | 0.272 | 0.22 | 1 | HC_vs_MS.Trt_F |
| C3orf18  | 0.24671 | 0.30434 | 0.315 | 0.27 | 1 | HC_vs_MS.Trt_F |
| PIK3CG   | 0.24684 | -0.7906 | 0.355 | 0.3  | 1 | HC_vs_MS.Trt_F |



|         |         |         |       |      |   |                |
|---------|---------|---------|-------|------|---|----------------|
| TYSND1  | 0.24712 | -0.3913 | 0.277 | 0.23 | 1 | HC_vs_MS.Trt_F |
| ZNF550  | 0.24731 | -0.7077 | 0.344 | 0.29 | 1 | HC_vs_MS.Trt_F |
| EIF5A2  | 0.24765 | -0.6159 | 0.419 | 0.35 | 1 | HC_vs_MS.Trt_F |
| OGFOD3  | 0.24767 | -0.4501 | 0.604 | 0.6  | 1 | HC_vs_MS.Trt_F |
| FBXO34  | 0.24788 | -0.7559 | 0.142 | 0.11 | 1 | HC_vs_MS.Trt_F |
| SMAD4   | 0.24793 | 0.65692 | 0.512 | 0.44 | 1 | HC_vs_MS.Trt_F |
| ANGPT4  | 0.24803 | -0.3184 | 0.448 | 0.49 | 1 | HC_vs_MS.Trt_F |
| MAP3K3  | 0.24846 | -0.4897 | 0.179 | 0.14 | 1 | HC_vs_MS.Trt_F |
| SGK494  | 0.24857 | -0.4937 | 0.777 | 0.7  | 1 | HC_vs_MS.Trt_F |
| ZBTB2   | 0.24887 | -1.2003 | 0.101 | 0.13 | 1 | HC_vs_MS.Trt_F |
| NPC1L1  | 0.249   | 0.33173 | 0.188 | 0.16 | 1 | HC_vs_MS.Trt_F |
| C5orf51 | 0.24907 | 0.26506 | 0.145 | 0.11 | 1 | HC_vs_MS.Trt_F |
| TUBG1   | 0.2494  | 0.79418 | 0.668 | 0.62 | 1 | HC_vs_MS.Trt_F |
| GPR35   | 0.24954 | 0.82542 | 0.321 | 0.27 | 1 | HC_vs_MS.Trt_F |
| TOB1    | 0.25    | -0.303  | 0.621 | 0.63 | 1 | HC_vs_MS.Trt_F |
| APIP    | 0.25039 | -0.2536 | 0.509 | 0.48 | 1 | HC_vs_MS.Trt_F |
| ATF4    | 0.25048 | 0.51632 | 0.188 | 0.16 | 1 | HC_vs_MS.Trt_F |
| NPL     | 0.25048 | 1.28698 | 0.223 | 0.27 | 1 | HC_vs_MS.Trt_F |
| ASB2    | 0.25049 | -1.2951 | 0.078 | 0.1  | 1 | HC_vs_MS.Trt_F |
| INTS3   | 0.25051 | 0.29416 | 0.769 | 0.73 | 1 | HC_vs_MS.Trt_F |
| UBE2Q2  | 0.25081 | 0.32994 | 0.15  | 0.12 | 1 | HC_vs_MS.Trt_F |
| WIZ     | 0.25084 | 0.54269 | 0.355 | 0.31 | 1 | HC_vs_MS.Trt_F |
| LIFR    | 0.25084 | -0.7781 | 0.142 | 0.18 | 1 | HC_vs_MS.Trt_F |
| NRBF2   | 0.25139 | -0.6155 | 0.139 | 0.17 | 1 | HC_vs_MS.Trt_F |
| GK      | 0.25148 | 0.6359  | 0.228 | 0.19 | 1 | HC_vs_MS.Trt_F |
| DNAH6   | 0.25159 | -0.4943 | 0.191 | 0.22 | 1 | HC_vs_MS.Trt_F |
| USP20   | 0.25186 | -0.4348 | 0.249 | 0.28 | 1 | HC_vs_MS.Trt_F |
| CNDP1   | 0.25186 | 0.45685 | 0.671 | 0.62 | 1 | HC_vs_MS.Trt_F |
| ZBTB7A  | 0.25187 | -0.6577 | 0.162 | 0.13 | 1 | HC_vs_MS.Trt_F |
| KIF13A  | 0.25198 | 1.17076 | 0.364 | 0.31 | 1 | HC_vs_MS.Trt_F |
| MYD88   | 0.252   | 0.59945 | 0.176 | 0.14 | 1 | HC_vs_MS.Trt_F |
| CD300LD | 0.25235 | -1.1008 | 0.355 | 0.39 | 1 | HC_vs_MS.Trt_F |
| APAF1   | 0.25266 | -0.3154 | 0.676 | 0.6  | 1 | HC_vs_MS.Trt_F |
| DNPH1   | 0.25288 | -0.6712 | 0.185 | 0.21 | 1 | HC_vs_MS.Trt_F |
| USF1    | 0.25298 | -0.4665 | 0.223 | 0.18 | 1 | HC_vs_MS.Trt_F |
| NDST1   | 0.2532  | 0.86994 | 0.382 | 0.43 | 1 | HC_vs_MS.Trt_F |
| MRPL50  | 0.25335 | -0.5702 | 0.165 | 0.13 | 1 | HC_vs_MS.Trt_F |
| POLG    | 0.25346 | -0.2659 | 0.179 | 0.14 | 1 | HC_vs_MS.Trt_F |
| PAG1    | 0.25365 | -0.421  | 0.757 | 0.69 | 1 | HC_vs_MS.Trt_F |
| ACTR2   | 0.25382 | -0.7345 | 0.413 | 0.42 | 1 | HC_vs_MS.Trt_F |

|          |         |         |       |      |   |                |
|----------|---------|---------|-------|------|---|----------------|
| SIN3A    | 0.25383 | -0.3572 | 0.832 | 0.78 | 1 | HC_vs_MS.Trt_F |
| NEIL1    | 0.25388 | 0.48864 | 0.824 | 0.74 | 1 | HC_vs_MS.Trt_F |
| GRN      | 0.25393 | -0.6142 | 0.211 | 0.17 | 1 | HC_vs_MS.Trt_F |
| SLC30A4  | 0.25406 | -0.9816 | 0.905 | 0.85 | 1 | HC_vs_MS.Trt_F |
| RRP8     | 0.25433 | 0.25128 | 0.529 | 0.48 | 1 | HC_vs_MS.Trt_F |
| NDST2    | 0.25445 | 0.39022 | 0.124 | 0.09 | 1 | HC_vs_MS.Trt_F |
| EML2     | 0.25449 | 0.33525 | 0.714 | 0.69 | 1 | HC_vs_MS.Trt_F |
| CLMN     | 0.2549  | -0.2569 | 0.711 | 0.63 | 1 | HC_vs_MS.Trt_F |
| FBXO7    | 0.25538 | 0.28589 | 0.315 | 0.28 | 1 | HC_vs_MS.Trt_F |
| C6orf163 | 0.25539 | -0.3932 | 0.474 | 0.42 | 1 | HC_vs_MS.Trt_F |
| MED19    | 0.25545 | 1.19328 | 0.113 | 0.09 | 1 | HC_vs_MS.Trt_F |
| P4HTM    | 0.25557 | 0.39414 | 0.442 | 0.4  | 1 | HC_vs_MS.Trt_F |
| RGS11    | 0.25565 | 0.60699 | 0.217 | 0.18 | 1 | HC_vs_MS.Trt_F |
| PDHB     | 0.25578 | -0.2746 | 0.844 | 0.82 | 1 | HC_vs_MS.Trt_F |
| CLSPN    | 0.25666 | 0.27732 | 0.91  | 0.85 | 1 | HC_vs_MS.Trt_F |
| ADGRL1   | 0.25714 | 0.38834 | 0.101 | 0.08 | 1 | HC_vs_MS.Trt_F |
| PGM1     | 0.25724 | 0.37786 | 0.127 | 0.1  | 1 | HC_vs_MS.Trt_F |
| ZNF16    | 0.25773 | 0.28921 | 0.809 | 0.77 | 1 | HC_vs_MS.Trt_F |
| PDK3     | 0.25783 | -0.9838 | 0.41  | 0.33 | 1 | HC_vs_MS.Trt_F |
| ATG7     | 0.25784 | -0.8829 | 0.63  | 0.54 | 1 | HC_vs_MS.Trt_F |
| RUBCN    | 0.25791 | -0.3771 | 0.873 | 0.87 | 1 | HC_vs_MS.Trt_F |
| SMIM20   | 0.25797 | -0.316  | 0.087 | 0.11 | 1 | HC_vs_MS.Trt_F |
| UBE2E1   | 0.25798 | 1.01161 | 0.11  | 0.08 | 1 | HC_vs_MS.Trt_F |
| TCTA     | 0.25804 | 0.2507  | 0.633 | 0.58 | 1 | HC_vs_MS.Trt_F |
| TLE3     | 0.25805 | -0.3597 | 0.298 | 0.23 | 1 | HC_vs_MS.Trt_F |
| AES      | 0.25852 | -0.2612 | 0.5   | 0.51 | 1 | HC_vs_MS.Trt_F |
| LGR6     | 0.25861 | -1.6737 | 0.168 | 0.14 | 1 | HC_vs_MS.Trt_F |
| SNX20    | 0.25869 | -0.2504 | 0.419 | 0.45 | 1 | HC_vs_MS.Trt_F |
| GRINA    | 0.25914 | 0.36056 | 0.121 | 0.09 | 1 | HC_vs_MS.Trt_F |
| ANKRD27  | 0.25936 | -0.3434 | 0.26  | 0.21 | 1 | HC_vs_MS.Trt_F |
| OLR1     | 0.25945 | 0.41789 | 0.471 | 0.41 | 1 | HC_vs_MS.Trt_F |
| ADD1     | 0.25983 | -0.3417 | 0.777 | 0.78 | 1 | HC_vs_MS.Trt_F |
| FKBP11   | 0.26048 | 0.37625 | 0.72  | 0.7  | 1 | HC_vs_MS.Trt_F |
| USF3     | 0.26075 | 0.42809 | 0.737 | 0.73 | 1 | HC_vs_MS.Trt_F |
| DZIP1    | 0.26075 | 0.42272 | 0.393 | 0.36 | 1 | HC_vs_MS.Trt_F |
| RFT1     | 0.26098 | -0.2505 | 0.514 | 0.46 | 1 | HC_vs_MS.Trt_F |
| CXorf57  | 0.26113 | 1.48491 | 0.179 | 0.15 | 1 | HC_vs_MS.Trt_F |
| DEK      | 0.26116 | -0.3516 | 0.454 | 0.41 | 1 | HC_vs_MS.Trt_F |
| MRM2     | 0.26124 | -0.7557 | 0.393 | 0.32 | 1 | HC_vs_MS.Trt_F |
| REPS2    | 0.26156 | 0.32026 | 0.647 | 0.63 | 1 | HC_vs_MS.Trt_F |

|          |         |         |       |      |   |                |
|----------|---------|---------|-------|------|---|----------------|
| F2RL3    | 0.26168 | 0.49763 | 0.818 | 0.73 | 1 | HC_vs_MS.Trt_F |
| ANKS3    | 0.26171 | 0.38677 | 0.818 | 0.79 | 1 | HC_vs_MS.Trt_F |
| HEMK1    | 0.26181 | -0.4457 | 0.974 | 0.96 | 1 | HC_vs_MS.Trt_F |
| EIF3J    | 0.26186 | 0.27256 | 0.202 | 0.17 | 1 | HC_vs_MS.Trt_F |
| PAK2     | 0.262   | 0.41695 | 0.74  | 0.68 | 1 | HC_vs_MS.Trt_F |
| ISYNA1   | 0.26273 | 1.04883 | 0.11  | 0.08 | 1 | HC_vs_MS.Trt_F |
| CNIH1    | 0.26284 | -0.6313 | 0.145 | 0.11 | 1 | HC_vs_MS.Trt_F |
| DEF8     | 0.26304 | -1.0521 | 0.512 | 0.46 | 1 | HC_vs_MS.Trt_F |
| BRMS1    | 0.26339 | -0.3797 | 0.185 | 0.14 | 1 | HC_vs_MS.Trt_F |
| ADCY9    | 0.26368 | -0.9498 | 0.335 | 0.29 | 1 | HC_vs_MS.Trt_F |
| KRBOX4   | 0.2637  | -0.6564 | 0.483 | 0.48 | 1 | HC_vs_MS.Trt_F |
| MRPL13   | 0.26374 | -0.2709 | 0.168 | 0.13 | 1 | HC_vs_MS.Trt_F |
| SNW1     | 0.26397 | 0.3532  | 0.275 | 0.23 | 1 | HC_vs_MS.Trt_F |
| LIPH     | 0.26411 | 0.30087 | 0.697 | 0.67 | 1 | HC_vs_MS.Trt_F |
| CFH      | 0.26418 | 0.44285 | 0.127 | 0.1  | 1 | HC_vs_MS.Trt_F |
| FAAP100  | 0.26422 | -0.4674 | 0.205 | 0.16 | 1 | HC_vs_MS.Trt_F |
| C18orf25 | 0.26442 | -0.2638 | 0.468 | 0.5  | 1 | HC_vs_MS.Trt_F |
| CCDC191  | 0.26447 | 0.55424 | 0.237 | 0.2  | 1 | HC_vs_MS.Trt_F |
| PXK      | 0.26449 | -0.2722 | 0.153 | 0.12 | 1 | HC_vs_MS.Trt_F |
| POP7     | 0.26466 | -1.0252 | 0.081 | 0.1  | 1 | HC_vs_MS.Trt_F |
| TRIM8    | 0.26496 | -0.7828 | 0.087 | 0.11 | 1 | HC_vs_MS.Trt_F |
| FN3KRP   | 0.26497 | -0.3156 | 0.145 | 0.11 | 1 | HC_vs_MS.Trt_F |
| ZNF230   | 0.26505 | 0.28981 | 0.633 | 0.57 | 1 | HC_vs_MS.Trt_F |
| EIF2AK4  | 0.26546 | -0.3325 | 0.705 | 0.62 | 1 | HC_vs_MS.Trt_F |
| DOPEY1   | 0.26583 | 0.73258 | 0.327 | 0.29 | 1 | HC_vs_MS.Trt_F |
| APLP1    | 0.26584 | 0.27262 | 0.676 | 0.61 | 1 | HC_vs_MS.Trt_F |
| MPP5     | 0.26612 | 0.37879 | 0.399 | 0.34 | 1 | HC_vs_MS.Trt_F |
| DUSP12   | 0.26615 | -0.6905 | 0.341 | 0.35 | 1 | HC_vs_MS.Trt_F |
| GGT7     | 0.26627 | 0.29877 | 0.194 | 0.16 | 1 | HC_vs_MS.Trt_F |
| NFYB     | 0.26629 | -1.4496 | 0.303 | 0.33 | 1 | HC_vs_MS.Trt_F |
| AMACR    | 0.26633 | -0.7467 | 0.075 | 0.1  | 1 | HC_vs_MS.Trt_F |
| SLC37A3  | 0.26645 | -0.4038 | 0.945 | 0.94 | 1 | HC_vs_MS.Trt_F |
| SMG8     | 0.26672 | -0.9889 | 0.107 | 0.13 | 1 | HC_vs_MS.Trt_F |
| MGST3    | 0.2674  | -0.3302 | 0.902 | 0.82 | 1 | HC_vs_MS.Trt_F |
| SCPEP1   | 0.26751 | 0.34086 | 0.772 | 0.79 | 1 | HC_vs_MS.Trt_F |
| RING1    | 0.26768 | 0.43746 | 0.104 | 0.08 | 1 | HC_vs_MS.Trt_F |
| SGSH     | 0.26778 | 0.4618  | 0.558 | 0.53 | 1 | HC_vs_MS.Trt_F |
| THOC6    | 0.26787 | 0.65276 | 0.13  | 0.1  | 1 | HC_vs_MS.Trt_F |
| GPR183   | 0.26818 | 0.278   | 0.402 | 0.37 | 1 | HC_vs_MS.Trt_F |
| AGPAT1   | 0.26824 | -0.9802 | 0.118 | 0.14 | 1 | HC_vs_MS.Trt_F |

|             |         |         |       |      |   |                |
|-------------|---------|---------|-------|------|---|----------------|
| TOMM20      | 0.26825 | 0.28239 | 0.231 | 0.19 | 1 | HC_vs_MS.Trt_F |
| FYCO1       | 0.2684  | 0.48209 | 0.214 | 0.18 | 1 | HC_vs_MS.Trt_F |
| RFX3        | 0.2685  | 0.42997 | 0.228 | 0.19 | 1 | HC_vs_MS.Trt_F |
| TYMP        | 0.26851 | 0.83281 | 0.367 | 0.32 | 1 | HC_vs_MS.Trt_F |
| ZNF415      | 0.26853 | -0.7326 | 0.332 | 0.3  | 1 | HC_vs_MS.Trt_F |
| POMT1       | 0.26866 | -0.271  | 0.584 | 0.55 | 1 | HC_vs_MS.Trt_F |
| IFT57       | 0.269   | 0.45109 | 0.142 | 0.11 | 1 | HC_vs_MS.Trt_F |
| CACUL1      | 0.26961 | -1.0654 | 0.783 | 0.77 | 1 | HC_vs_MS.Trt_F |
| ATG3        | 0.26966 | -0.2935 | 0.5   | 0.46 | 1 | HC_vs_MS.Trt_F |
| LRRC49      | 0.26972 | 1.16232 | 0.792 | 0.77 | 1 | HC_vs_MS.Trt_F |
| NKIRAS2     | 0.26985 | -0.8133 | 0.873 | 0.84 | 1 | HC_vs_MS.Trt_F |
| TOR2A       | 0.27045 | -0.9262 | 0.133 | 0.1  | 1 | HC_vs_MS.Trt_F |
| ARHGEF40    | 0.27046 | -0.8513 | 0.217 | 0.18 | 1 | HC_vs_MS.Trt_F |
| HSD17B4     | 0.27053 | -0.667  | 0.656 | 0.59 | 1 | HC_vs_MS.Trt_F |
| BTBD7       | 0.27088 | -0.6955 | 0.818 | 0.79 | 1 | HC_vs_MS.Trt_F |
| HIPK3       | 0.27121 | 0.41637 | 0.179 | 0.15 | 1 | HC_vs_MS.Trt_F |
| PIK3R3      | 0.27145 | 0.42115 | 0.569 | 0.5  | 1 | HC_vs_MS.Trt_F |
| CDH26       | 0.27153 | 0.65872 | 0.173 | 0.14 | 1 | HC_vs_MS.Trt_F |
| MIF         | 0.27157 | -0.6401 | 0.471 | 0.46 | 1 | HC_vs_MS.Trt_F |
| F3          | 0.27167 | 0.26551 | 0.535 | 0.5  | 1 | HC_vs_MS.Trt_F |
| RGP1        | 0.27193 | 0.58858 | 0.194 | 0.16 | 1 | HC_vs_MS.Trt_F |
| PIP5K1C     | 0.27203 | 0.38026 | 0.13  | 0.1  | 1 | HC_vs_MS.Trt_F |
| KNG1        | 0.27222 | 0.73796 | 0.263 | 0.22 | 1 | HC_vs_MS.Trt_F |
| SFXN5       | 0.27251 | 0.47644 | 0.945 | 0.94 | 1 | HC_vs_MS.Trt_F |
| MTMR2       | 0.27257 | -0.9503 | 0.208 | 0.17 | 1 | HC_vs_MS.Trt_F |
| CAMSAP1     | 0.2729  | 0.4939  | 0.104 | 0.08 | 1 | HC_vs_MS.Trt_F |
| ZNF630      | 0.27358 | 0.77833 | 0.413 | 0.45 | 1 | HC_vs_MS.Trt_F |
| SKIL        | 0.27409 | 0.2542  | 0.341 | 0.37 | 1 | HC_vs_MS.Trt_F |
| MATN1       | 0.27444 | 0.28252 | 0.116 | 0.09 | 1 | HC_vs_MS.Trt_F |
| C17orf89    | 0.27468 | -0.9225 | 0.095 | 0.12 | 1 | HC_vs_MS.Trt_F |
| UBE2L3      | 0.27476 | -0.4328 | 0.286 | 0.31 | 1 | HC_vs_MS.Trt_F |
| CAPN10      | 0.27493 | 0.33474 | 0.566 | 0.51 | 1 | HC_vs_MS.Trt_F |
| CH507-9B2.! | 0.27497 | 1.1669  | 0.142 | 0.11 | 1 | HC_vs_MS.Trt_F |
| PHF8        | 0.27523 | 0.66269 | 0.15  | 0.12 | 1 | HC_vs_MS.Trt_F |
| PARP8       | 0.27546 | -0.4249 | 0.514 | 0.45 | 1 | HC_vs_MS.Trt_F |
| ZNF569      | 0.27563 | 0.42727 | 0.228 | 0.19 | 1 | HC_vs_MS.Trt_F |
| SNX11       | 0.27628 | 0.47124 | 0.642 | 0.6  | 1 | HC_vs_MS.Trt_F |
| GTF2H1      | 0.27647 | 0.642   | 0.448 | 0.41 | 1 | HC_vs_MS.Trt_F |
| IKBKG       | 0.27649 | 0.28479 | 0.199 | 0.17 | 1 | HC_vs_MS.Trt_F |
| POLI        | 0.27651 | -0.9164 | 0.41  | 0.35 | 1 | HC_vs_MS.Trt_F |

|            |         |         |       |      |   |                |
|------------|---------|---------|-------|------|---|----------------|
| ARV1       | 0.27656 | 0.83605 | 0.329 | 0.28 | 1 | HC_vs_MS.Trt_F |
| ITGB1BP1   | 0.27667 | -0.8019 | 0.191 | 0.22 | 1 | HC_vs_MS.Trt_F |
| RASSF3     | 0.27671 | -0.433  | 0.569 | 0.58 | 1 | HC_vs_MS.Trt_F |
| R3HCC1     | 0.27676 | 0.37367 | 0.139 | 0.11 | 1 | HC_vs_MS.Trt_F |
| PRKAR1B    | 0.27684 | -0.5055 | 0.127 | 0.1  | 1 | HC_vs_MS.Trt_F |
| STAM2      | 0.27687 | -0.7653 | 0.552 | 0.58 | 1 | HC_vs_MS.Trt_F |
| CCR10      | 0.27724 | 0.37067 | 0.156 | 0.12 | 1 | HC_vs_MS.Trt_F |
| FAM189B    | 0.27744 | 0.29286 | 0.746 | 0.71 | 1 | HC_vs_MS.Trt_F |
| KIZ        | 0.27745 | 0.47919 | 0.147 | 0.12 | 1 | HC_vs_MS.Trt_F |
| DYDC2      | 0.27774 | 0.29321 | 0.101 | 0.08 | 1 | HC_vs_MS.Trt_F |
| CPSF3      | 0.27785 | 0.79859 | 0.136 | 0.11 | 1 | HC_vs_MS.Trt_F |
| CPSF4      | 0.27786 | -0.3807 | 0.497 | 0.42 | 1 | HC_vs_MS.Trt_F |
| ALG2       | 0.27808 | -0.8276 | 0.11  | 0.13 | 1 | HC_vs_MS.Trt_F |
| AC138969.4 | 0.27819 | 0.72659 | 0.448 | 0.4  | 1 | HC_vs_MS.Trt_F |
| ZNF30      | 0.27829 | -0.3176 | 0.078 | 0.1  | 1 | HC_vs_MS.Trt_F |
| DUS3L      | 0.27843 | -0.3084 | 0.188 | 0.15 | 1 | HC_vs_MS.Trt_F |
| B3GAT2     | 0.27866 | -1.198  | 0.202 | 0.17 | 1 | HC_vs_MS.Trt_F |
| DGCR6L     | 0.27879 | 0.261   | 0.171 | 0.14 | 1 | HC_vs_MS.Trt_F |
| LRWD1      | 0.27898 | 0.44758 | 0.61  | 0.63 | 1 | HC_vs_MS.Trt_F |
| ERMN       | 0.27904 | -0.6189 | 0.197 | 0.23 | 1 | HC_vs_MS.Trt_F |
| C2orf50    | 0.27908 | -0.2691 | 0.41  | 0.41 | 1 | HC_vs_MS.Trt_F |
| TRAPPC10   | 0.27922 | 0.82362 | 0.295 | 0.26 | 1 | HC_vs_MS.Trt_F |
| SLC23A2    | 0.27922 | 0.54629 | 0.179 | 0.15 | 1 | HC_vs_MS.Trt_F |
| ENPP6      | 0.27926 | 0.34597 | 0.37  | 0.32 | 1 | HC_vs_MS.Trt_F |
| ZFX        | 0.27978 | -0.6067 | 0.653 | 0.62 | 1 | HC_vs_MS.Trt_F |
| ZNF613     | 0.27979 | -1.414  | 0.422 | 0.36 | 1 | HC_vs_MS.Trt_F |
| C16orf58   | 0.27984 | -0.6398 | 0.179 | 0.14 | 1 | HC_vs_MS.Trt_F |
| SERPINH1   | 0.27988 | -0.3075 | 0.39  | 0.34 | 1 | HC_vs_MS.Trt_F |
| COX10      | 0.27999 | 0.83216 | 0.13  | 0.1  | 1 | HC_vs_MS.Trt_F |
| GPD1L      | 0.28045 | -0.5904 | 0.136 | 0.16 | 1 | HC_vs_MS.Trt_F |
| PRIM1      | 0.28057 | 0.55757 | 0.176 | 0.14 | 1 | HC_vs_MS.Trt_F |
| SUFU       | 0.28061 | 0.27547 | 0.121 | 0.09 | 1 | HC_vs_MS.Trt_F |
| CLPTM1     | 0.28137 | -0.4041 | 0.225 | 0.18 | 1 | HC_vs_MS.Trt_F |
| PRRC1      | 0.28139 | -0.9156 | 0.448 | 0.36 | 1 | HC_vs_MS.Trt_F |
| ZMAT2      | 0.28156 | -0.4765 | 0.136 | 0.1  | 1 | HC_vs_MS.Trt_F |
| QTRT1      | 0.28168 | 0.32668 | 0.844 | 0.82 | 1 | HC_vs_MS.Trt_F |
| ABHD17A    | 0.28184 | 0.67244 | 0.136 | 0.11 | 1 | HC_vs_MS.Trt_F |
| PINK1      | 0.28187 | 0.50253 | 0.301 | 0.26 | 1 | HC_vs_MS.Trt_F |
| SMARCA4    | 0.28293 | 0.36463 | 0.829 | 0.81 | 1 | HC_vs_MS.Trt_F |
| EMD        | 0.28295 | 0.30338 | 0.329 | 0.29 | 1 | HC_vs_MS.Trt_F |

|            |         |         |       |      |   |                |
|------------|---------|---------|-------|------|---|----------------|
| ZNF706     | 0.28302 | -0.4006 | 0.373 | 0.4  | 1 | HC_vs_MS.Trt_F |
| ABCD4      | 0.28314 | -0.3477 | 0.855 | 0.8  | 1 | HC_vs_MS.Trt_F |
| HDAC3      | 0.2832  | -0.3283 | 0.156 | 0.12 | 1 | HC_vs_MS.Trt_F |
| ATP5G2     | 0.28325 | -0.3662 | 0.87  | 0.87 | 1 | HC_vs_MS.Trt_F |
| RECQL      | 0.28341 | -1.0631 | 0.171 | 0.19 | 1 | HC_vs_MS.Trt_F |
| TOR1AIP2   | 0.28344 | -0.4885 | 0.994 | 0.98 | 1 | HC_vs_MS.Trt_F |
| MTHFR      | 0.28357 | -0.3911 | 0.838 | 0.8  | 1 | HC_vs_MS.Trt_F |
| TNFAIP1    | 0.2842  | 0.80183 | 0.113 | 0.09 | 1 | HC_vs_MS.Trt_F |
| MKRN2      | 0.28491 | 0.38535 | 0.118 | 0.09 | 1 | HC_vs_MS.Trt_F |
| ARF4       | 0.28507 | -1.1549 | 0.182 | 0.21 | 1 | HC_vs_MS.Trt_F |
| PLCD4      | 0.28513 | 0.39573 | 0.344 | 0.3  | 1 | HC_vs_MS.Trt_F |
| SERTAD2    | 0.28514 | 0.61947 | 0.145 | 0.12 | 1 | HC_vs_MS.Trt_F |
| FAM76A     | 0.28595 | -0.6411 | 0.855 | 0.86 | 1 | HC_vs_MS.Trt_F |
| ZNF524     | 0.286   | -0.6929 | 0.124 | 0.15 | 1 | HC_vs_MS.Trt_F |
| TRIM34     | 0.28605 | -0.4612 | 0.387 | 0.31 | 1 | HC_vs_MS.Trt_F |
| CTD-3088G3 | 0.28609 | 0.42244 | 0.561 | 0.5  | 1 | HC_vs_MS.Trt_F |
| TROVE2     | 0.28624 | -0.353  | 0.717 | 0.64 | 1 | HC_vs_MS.Trt_F |
| CDYL2      | 0.2866  | 0.26605 | 0.127 | 0.1  | 1 | HC_vs_MS.Trt_F |
| NAIF1      | 0.28675 | 0.27593 | 0.659 | 0.6  | 1 | HC_vs_MS.Trt_F |
| HARBI1     | 0.28687 | -0.6266 | 0.665 | 0.6  | 1 | HC_vs_MS.Trt_F |
| IARS2      | 0.28701 | -0.3387 | 0.171 | 0.14 | 1 | HC_vs_MS.Trt_F |
| DCAF6      | 0.28718 | 0.55433 | 0.269 | 0.22 | 1 | HC_vs_MS.Trt_F |
| LSM4       | 0.28748 | -0.2555 | 0.22  | 0.18 | 1 | HC_vs_MS.Trt_F |
| AP5B1      | 0.28774 | 0.58917 | 0.335 | 0.29 | 1 | HC_vs_MS.Trt_F |
| PDCL3      | 0.28808 | -0.5328 | 0.124 | 0.15 | 1 | HC_vs_MS.Trt_F |
| RNF111     | 0.28817 | -0.3216 | 0.335 | 0.28 | 1 | HC_vs_MS.Trt_F |
| ALG10B     | 0.2882  | -0.2636 | 0.725 | 0.75 | 1 | HC_vs_MS.Trt_F |
| ATG5       | 0.28835 | -0.4913 | 0.185 | 0.15 | 1 | HC_vs_MS.Trt_F |
| ZNF33B     | 0.2884  | -0.6987 | 0.488 | 0.51 | 1 | HC_vs_MS.Trt_F |
| DNAJC7     | 0.28861 | -0.4962 | 0.977 | 0.97 | 1 | HC_vs_MS.Trt_F |
| CDNF       | 0.28882 | -0.8039 | 0.199 | 0.23 | 1 | HC_vs_MS.Trt_F |
| NCDN       | 0.28922 | 0.32311 | 0.211 | 0.17 | 1 | HC_vs_MS.Trt_F |
| CELF1      | 0.28974 | -0.5872 | 0.477 | 0.39 | 1 | HC_vs_MS.Trt_F |
| SEMA5A     | 0.2898  | 0.37135 | 0.39  | 0.41 | 1 | HC_vs_MS.Trt_F |
| TRIM35     | 0.28985 | -0.5598 | 0.202 | 0.22 | 1 | HC_vs_MS.Trt_F |
| COG8       | 0.29012 | -0.2858 | 0.679 | 0.67 | 1 | HC_vs_MS.Trt_F |
| DTWD1      | 0.29076 | -0.2855 | 0.659 | 0.62 | 1 | HC_vs_MS.Trt_F |
| SKI        | 0.29083 | 0.6009  | 0.133 | 0.1  | 1 | HC_vs_MS.Trt_F |
| UTY        | 0.29084 | 1.19011 | 0.497 | 0.43 | 1 | HC_vs_MS.Trt_F |
| FRMD8      | 0.29113 | -0.631  | 0.639 | 0.64 | 1 | HC_vs_MS.Trt_F |

|          |         |         |       |      |   |                |
|----------|---------|---------|-------|------|---|----------------|
| MANEA    | 0.29155 | 0.53409 | 0.145 | 0.12 | 1 | HC_vs_MS.Trt_F |
| TM2D2    | 0.29163 | -0.5754 | 0.454 | 0.39 | 1 | HC_vs_MS.Trt_F |
| PTRH2    | 0.29175 | -0.8219 | 0.217 | 0.18 | 1 | HC_vs_MS.Trt_F |
| PPP1R13B | 0.29197 | 0.36354 | 0.535 | 0.47 | 1 | HC_vs_MS.Trt_F |
| TET3     | 0.29248 | 0.67832 | 0.107 | 0.08 | 1 | HC_vs_MS.Trt_F |
| CEP63    | 0.29266 | -0.381  | 0.786 | 0.67 | 1 | HC_vs_MS.Trt_F |
| ZNF581   | 0.29266 | 1.05543 | 0.116 | 0.09 | 1 | HC_vs_MS.Trt_F |
| ARFRP1   | 0.29266 | 0.27359 | 0.509 | 0.48 | 1 | HC_vs_MS.Trt_F |
| ZNF737   | 0.29277 | 0.42416 | 0.899 | 0.85 | 1 | HC_vs_MS.Trt_F |
| RPUSD4   | 0.29309 | -0.4061 | 0.749 | 0.69 | 1 | HC_vs_MS.Trt_F |
| CDC26    | 0.29356 | -0.7615 | 0.231 | 0.25 | 1 | HC_vs_MS.Trt_F |
| AGAP2    | 0.29399 | 0.44435 | 0.225 | 0.19 | 1 | HC_vs_MS.Trt_F |
| PTPRF    | 0.29401 | -0.2854 | 0.341 | 0.36 | 1 | HC_vs_MS.Trt_F |
| GALK2    | 0.29402 | 0.33622 | 0.91  | 0.89 | 1 | HC_vs_MS.Trt_F |
| DOCK4    | 0.29407 | 0.44896 | 0.318 | 0.28 | 1 | HC_vs_MS.Trt_F |
| MTMR3    | 0.29448 | 1.17976 | 0.272 | 0.24 | 1 | HC_vs_MS.Trt_F |
| GINS4    | 0.29452 | 0.29177 | 0.916 | 0.86 | 1 | HC_vs_MS.Trt_F |
| RIN1     | 0.29458 | 1.04029 | 0.199 | 0.23 | 1 | HC_vs_MS.Trt_F |
| CLDN12   | 0.29502 | 0.28464 | 0.471 | 0.44 | 1 | HC_vs_MS.Trt_F |
| CGREF1   | 0.29511 | 0.42259 | 0.101 | 0.13 | 1 | HC_vs_MS.Trt_F |
| ABCD3    | 0.29538 | -0.4902 | 0.176 | 0.14 | 1 | HC_vs_MS.Trt_F |
| TRMT44   | 0.2957  | 0.26304 | 0.28  | 0.23 | 1 | HC_vs_MS.Trt_F |
| SNRPD2   | 0.29579 | -0.331  | 0.509 | 0.53 | 1 | HC_vs_MS.Trt_F |
| ERP27    | 0.29604 | -0.2798 | 0.26  | 0.22 | 1 | HC_vs_MS.Trt_F |
| METTL9   | 0.29623 | -0.4869 | 0.656 | 0.59 | 1 | HC_vs_MS.Trt_F |
| ARL10    | 0.29631 | -0.453  | 0.922 | 0.9  | 1 | HC_vs_MS.Trt_F |
| IL24     | 0.29644 | 0.95384 | 0.136 | 0.11 | 1 | HC_vs_MS.Trt_F |
| NOMO1    | 0.29678 | -0.3856 | 0.199 | 0.17 | 1 | HC_vs_MS.Trt_F |
| TMEM230  | 0.29686 | -0.2889 | 0.46  | 0.5  | 1 | HC_vs_MS.Trt_F |
| SHISA2   | 0.29707 | 0.35693 | 0.298 | 0.26 | 1 | HC_vs_MS.Trt_F |
| NOVA1    | 0.29746 | 0.46126 | 0.113 | 0.09 | 1 | HC_vs_MS.Trt_F |
| LARP4B   | 0.29777 | -1.0013 | 0.283 | 0.31 | 1 | HC_vs_MS.Trt_F |
| MIEF1    | 0.29786 | -0.5    | 0.477 | 0.43 | 1 | HC_vs_MS.Trt_F |
| CHMP2B   | 0.29837 | -0.3233 | 0.176 | 0.14 | 1 | HC_vs_MS.Trt_F |
| AFAP1L1  | 0.29839 | 0.88146 | 0.569 | 0.54 | 1 | HC_vs_MS.Trt_F |
| TOMM5    | 0.29842 | -0.7926 | 0.194 | 0.22 | 1 | HC_vs_MS.Trt_F |
| PIK3AP1  | 0.29871 | 1.15142 | 0.147 | 0.12 | 1 | HC_vs_MS.Trt_F |
| SNAPC3   | 0.29881 | -0.3646 | 0.642 | 0.59 | 1 | HC_vs_MS.Trt_F |
| RAP1GAP2 | 0.29891 | -0.5949 | 0.246 | 0.27 | 1 | HC_vs_MS.Trt_F |
| TRAPPC5  | 0.29902 | -0.2769 | 0.942 | 0.91 | 1 | HC_vs_MS.Trt_F |

|          |         |         |       |      |   |                |
|----------|---------|---------|-------|------|---|----------------|
| SLC35A2  | 0.29952 | 0.32022 | 0.104 | 0.08 | 1 | HC_vs_MS.Trt_F |
| PCNT     | 0.29993 | -0.3133 | 0.199 | 0.23 | 1 | HC_vs_MS.Trt_F |
| TRAPPC2  | 0.30033 | -0.3781 | 0.948 | 0.89 | 1 | HC_vs_MS.Trt_F |
| YEATS4   | 0.30038 | -0.4939 | 0.225 | 0.19 | 1 | HC_vs_MS.Trt_F |
| GLTSCR2  | 0.30047 | 0.47994 | 0.876 | 0.87 | 1 | HC_vs_MS.Trt_F |
| WDR61    | 0.3005  | -0.2841 | 0.217 | 0.17 | 1 | HC_vs_MS.Trt_F |
| SIGLEC14 | 0.30084 | 0.55548 | 0.289 | 0.25 | 1 | HC_vs_MS.Trt_F |
| RELA     | 0.30099 | 0.58221 | 0.214 | 0.18 | 1 | HC_vs_MS.Trt_F |
| FAM83G   | 0.30106 | -0.3303 | 0.465 | 0.41 | 1 | HC_vs_MS.Trt_F |
| GRPEL1   | 0.30117 | -1.0039 | 0.156 | 0.18 | 1 | HC_vs_MS.Trt_F |
| EHBP1L1  | 0.30151 | -0.3099 | 0.246 | 0.2  | 1 | HC_vs_MS.Trt_F |
| PNO1     | 0.30176 | 0.26377 | 0.702 | 0.67 | 1 | HC_vs_MS.Trt_F |
| SIK1     | 0.30179 | 1.33338 | 0.159 | 0.13 | 1 | HC_vs_MS.Trt_F |
| POLM     | 0.30206 | -0.3015 | 0.566 | 0.52 | 1 | HC_vs_MS.Trt_F |
| OCIAD1   | 0.30258 | -0.617  | 0.633 | 0.68 | 1 | HC_vs_MS.Trt_F |
| FAAH2    | 0.30294 | 0.78583 | 0.127 | 0.1  | 1 | HC_vs_MS.Trt_F |
| DCLK1    | 0.303   | 0.88284 | 0.361 | 0.31 | 1 | HC_vs_MS.Trt_F |
| NOP14    | 0.30357 | 0.31615 | 0.442 | 0.39 | 1 | HC_vs_MS.Trt_F |
| SLC14A1  | 0.30363 | -0.7495 | 0.552 | 0.5  | 1 | HC_vs_MS.Trt_F |
| RHOBTB2  | 0.3041  | 1.09926 | 0.104 | 0.08 | 1 | HC_vs_MS.Trt_F |
| MGRN1    | 0.30449 | 0.38667 | 0.864 | 0.84 | 1 | HC_vs_MS.Trt_F |
| COL1A1   | 0.30472 | 0.33397 | 0.558 | 0.53 | 1 | HC_vs_MS.Trt_F |
| SEC24B   | 0.30473 | -0.2827 | 0.538 | 0.5  | 1 | HC_vs_MS.Trt_F |
| RALGPS2  | 0.30473 | 0.40566 | 0.37  | 0.42 | 1 | HC_vs_MS.Trt_F |
| KLHL2    | 0.30508 | -0.6335 | 0.367 | 0.34 | 1 | HC_vs_MS.Trt_F |
| MIER2    | 0.30528 | -0.6271 | 0.509 | 0.53 | 1 | HC_vs_MS.Trt_F |
| CD276    | 0.30532 | 0.43722 | 0.512 | 0.46 | 1 | HC_vs_MS.Trt_F |
| ELMSAN1  | 0.30553 | -0.9309 | 0.749 | 0.73 | 1 | HC_vs_MS.Trt_F |
| DENND6B  | 0.3061  | 0.75642 | 0.399 | 0.35 | 1 | HC_vs_MS.Trt_F |
| NDUFS4   | 0.30669 | -0.5348 | 0.353 | 0.3  | 1 | HC_vs_MS.Trt_F |
| DOCK7    | 0.30744 | 0.29017 | 0.974 | 0.95 | 1 | HC_vs_MS.Trt_F |
| URB1     | 0.30751 | 1.25779 | 0.52  | 0.45 | 1 | HC_vs_MS.Trt_F |
| MBD3     | 0.30753 | 0.39455 | 0.775 | 0.71 | 1 | HC_vs_MS.Trt_F |
| SEL1L3   | 0.30754 | -0.4785 | 0.321 | 0.27 | 1 | HC_vs_MS.Trt_F |
| NEIL3    | 0.30765 | -0.5456 | 0.295 | 0.25 | 1 | HC_vs_MS.Trt_F |
| PRDX3    | 0.3078  | -0.3461 | 0.532 | 0.46 | 1 | HC_vs_MS.Trt_F |
| PABPC1L  | 0.30789 | 0.80538 | 0.321 | 0.29 | 1 | HC_vs_MS.Trt_F |
| BECN1    | 0.30797 | -0.3099 | 0.775 | 0.73 | 1 | HC_vs_MS.Trt_F |
| SENP6    | 0.30802 | -0.4361 | 0.922 | 0.86 | 1 | HC_vs_MS.Trt_F |
| COX8A    | 0.30878 | -0.3602 | 0.28  | 0.23 | 1 | HC_vs_MS.Trt_F |



|            |         |         |       |      |   |                |
|------------|---------|---------|-------|------|---|----------------|
| CBX3       | 0.30887 | -0.3146 | 0.587 | 0.51 | 1 | HC_vs_MS.Trt_F |
| MAK16      | 0.30889 | -0.4373 | 0.107 | 0.13 | 1 | HC_vs_MS.Trt_F |
| SARDH      | 0.30896 | 0.63098 | 0.486 | 0.44 | 1 | HC_vs_MS.Trt_F |
| ARHGAP5    | 0.30931 | 0.39711 | 0.462 | 0.41 | 1 | HC_vs_MS.Trt_F |
| IDH1       | 0.30951 | 1.10747 | 0.249 | 0.22 | 1 | HC_vs_MS.Trt_F |
| RP9        | 0.30958 | 0.28474 | 0.127 | 0.1  | 1 | HC_vs_MS.Trt_F |
| GRK3       | 0.30967 | -0.6717 | 0.408 | 0.35 | 1 | HC_vs_MS.Trt_F |
| ADAR       | 0.31036 | 0.4523  | 0.841 | 0.81 | 1 | HC_vs_MS.Trt_F |
| UBLCP1     | 0.31073 | 0.3275  | 0.214 | 0.18 | 1 | HC_vs_MS.Trt_F |
| UBE3D      | 0.31106 | -0.3483 | 0.671 | 0.64 | 1 | HC_vs_MS.Trt_F |
| C1orf131   | 0.31159 | -0.8503 | 0.636 | 0.59 | 1 | HC_vs_MS.Trt_F |
| CLIP2      | 0.3117  | 0.44458 | 0.405 | 0.36 | 1 | HC_vs_MS.Trt_F |
| HMGN3      | 0.31171 | -0.8223 | 0.211 | 0.23 | 1 | HC_vs_MS.Trt_F |
| LANCL3     | 0.31207 | -1.0397 | 0.358 | 0.31 | 1 | HC_vs_MS.Trt_F |
| RPE        | 0.31213 | 0.43802 | 0.353 | 0.32 | 1 | HC_vs_MS.Trt_F |
| EMC1       | 0.31225 | -0.3675 | 0.876 | 0.83 | 1 | HC_vs_MS.Trt_F |
| AL354822.1 | 0.31229 | 0.48104 | 0.286 | 0.24 | 1 | HC_vs_MS.Trt_F |
| PSG2       | 0.3124  | 0.36754 | 0.124 | 0.1  | 1 | HC_vs_MS.Trt_F |
| SGPL1      | 0.31277 | -0.8523 | 0.471 | 0.51 | 1 | HC_vs_MS.Trt_F |
| AP1G1      | 0.31323 | 0.28377 | 0.737 | 0.68 | 1 | HC_vs_MS.Trt_F |
| PUS7       | 0.31353 | -0.5443 | 0.373 | 0.33 | 1 | HC_vs_MS.Trt_F |
| ZNF227     | 0.31358 | 0.35035 | 0.549 | 0.52 | 1 | HC_vs_MS.Trt_F |
| FAM21A     | 0.3136  | -0.9136 | 0.225 | 0.18 | 1 | HC_vs_MS.Trt_F |
| ZNF678     | 0.31372 | 0.66233 | 0.228 | 0.19 | 1 | HC_vs_MS.Trt_F |
| C21orf91   | 0.31383 | -0.5239 | 0.22  | 0.18 | 1 | HC_vs_MS.Trt_F |
| ZNF407     | 0.31387 | 0.39483 | 0.124 | 0.1  | 1 | HC_vs_MS.Trt_F |
| INTS6      | 0.31429 | -0.4974 | 0.954 | 0.95 | 1 | HC_vs_MS.Trt_F |
| GGA3       | 0.31451 | -0.5135 | 0.191 | 0.21 | 1 | HC_vs_MS.Trt_F |
| OSBPL7     | 0.31469 | 0.47209 | 0.116 | 0.09 | 1 | HC_vs_MS.Trt_F |
| GRAMD1B    | 0.3148  | -0.3629 | 0.312 | 0.33 | 1 | HC_vs_MS.Trt_F |
| CTSO       | 0.31483 | 0.32611 | 0.124 | 0.1  | 1 | HC_vs_MS.Trt_F |
| CLN8       | 0.3152  | -0.3627 | 0.847 | 0.8  | 1 | HC_vs_MS.Trt_F |
| USP16      | 0.31533 | 0.36999 | 0.529 | 0.5  | 1 | HC_vs_MS.Trt_F |
| THAP7      | 0.31543 | 0.48027 | 0.139 | 0.11 | 1 | HC_vs_MS.Trt_F |
| FGF9       | 0.31545 | -0.3447 | 0.156 | 0.13 | 1 | HC_vs_MS.Trt_F |
| GRIN2C     | 0.31559 | 0.59509 | 0.28  | 0.24 | 1 | HC_vs_MS.Trt_F |
| PAX5       | 0.31627 | -0.2515 | 0.159 | 0.13 | 1 | HC_vs_MS.Trt_F |
| SH3RF2     | 0.3164  | 0.55528 | 0.191 | 0.22 | 1 | HC_vs_MS.Trt_F |
| SP140      | 0.31647 | 0.26931 | 0.289 | 0.24 | 1 | HC_vs_MS.Trt_F |
| NRF1       | 0.31663 | -1.1625 | 0.358 | 0.31 | 1 | HC_vs_MS.Trt_F |

|           |         |         |       |      |   |                |
|-----------|---------|---------|-------|------|---|----------------|
| ARHGAP19  | 0.31664 | -0.9396 | 0.277 | 0.3  | 1 | HC_vs_MS.Trt_F |
| FBXO42    | 0.31688 | 0.50186 | 0.512 | 0.49 | 1 | HC_vs_MS.Trt_F |
| BLMH      | 0.31688 | -0.7047 | 0.65  | 0.65 | 1 | HC_vs_MS.Trt_F |
| C1D       | 0.31697 | -0.6432 | 0.139 | 0.16 | 1 | HC_vs_MS.Trt_F |
| GSE1      | 0.31698 | 0.56403 | 0.454 | 0.4  | 1 | HC_vs_MS.Trt_F |
| PDCD10    | 0.317   | -0.2814 | 0.243 | 0.2  | 1 | HC_vs_MS.Trt_F |
| UBE2L5P   | 0.31707 | 0.55821 | 0.283 | 0.24 | 1 | HC_vs_MS.Trt_F |
| LINC00854 | 0.31797 | 0.72534 | 0.708 | 0.66 | 1 | HC_vs_MS.Trt_F |
| INTS6L    | 0.31806 | -0.3879 | 0.142 | 0.11 | 1 | HC_vs_MS.Trt_F |
| WDYHV1    | 0.3182  | 0.52579 | 0.13  | 0.1  | 1 | HC_vs_MS.Trt_F |
| KLHDC2    | 0.31832 | -0.6611 | 0.246 | 0.27 | 1 | HC_vs_MS.Trt_F |
| SPTBN1    | 0.31835 | -0.3752 | 0.344 | 0.29 | 1 | HC_vs_MS.Trt_F |
| IMPDH1    | 0.31861 | -0.3644 | 0.139 | 0.17 | 1 | HC_vs_MS.Trt_F |
| SLC39A9   | 0.31862 | 0.31461 | 0.225 | 0.19 | 1 | HC_vs_MS.Trt_F |
| ZNF93     | 0.31875 | -0.5094 | 0.613 | 0.53 | 1 | HC_vs_MS.Trt_F |
| SPRED1    | 0.31938 | 0.27773 | 0.188 | 0.16 | 1 | HC_vs_MS.Trt_F |
| SLX1B     | 0.31954 | -0.4239 | 0.5   | 0.5  | 1 | HC_vs_MS.Trt_F |
| CD40      | 0.31973 | 0.45481 | 0.185 | 0.15 | 1 | HC_vs_MS.Trt_F |
| STARD10   | 0.31977 | 0.2665  | 0.855 | 0.82 | 1 | HC_vs_MS.Trt_F |
| SNAPC5    | 0.31986 | -0.5266 | 0.616 | 0.6  | 1 | HC_vs_MS.Trt_F |
| ANGEL1    | 0.31996 | 0.34729 | 0.471 | 0.43 | 1 | HC_vs_MS.Trt_F |
| PPT1      | 0.32031 | -0.6546 | 0.214 | 0.23 | 1 | HC_vs_MS.Trt_F |
| MAGED2    | 0.32072 | -0.4791 | 0.24  | 0.19 | 1 | HC_vs_MS.Trt_F |
| CNOT7     | 0.32088 | -0.8124 | 0.546 | 0.54 | 1 | HC_vs_MS.Trt_F |
| POU6F1    | 0.32123 | -0.3487 | 0.558 | 0.49 | 1 | HC_vs_MS.Trt_F |
| SIGLEC8   | 0.32176 | 0.30014 | 0.578 | 0.52 | 1 | HC_vs_MS.Trt_F |
| MEIS3     | 0.3224  | -1.1802 | 0.127 | 0.1  | 1 | HC_vs_MS.Trt_F |
| COG1      | 0.32244 | 0.35632 | 0.902 | 0.85 | 1 | HC_vs_MS.Trt_F |
| DNAJC13   | 0.32264 | 0.36891 | 0.263 | 0.22 | 1 | HC_vs_MS.Trt_F |
| RND1      | 0.32268 | 0.28896 | 0.613 | 0.57 | 1 | HC_vs_MS.Trt_F |
| FAM210A   | 0.32297 | -0.2803 | 0.39  | 0.33 | 1 | HC_vs_MS.Trt_F |
| ZCCHC11   | 0.32326 | 0.38618 | 0.945 | 0.92 | 1 | HC_vs_MS.Trt_F |
| ACSM6     | 0.32387 | 0.45274 | 0.147 | 0.12 | 1 | HC_vs_MS.Trt_F |
| IFIT3     | 0.32409 | -2.123  | 0.581 | 0.56 | 1 | HC_vs_MS.Trt_F |
| MS4A2     | 0.32416 | 0.51613 | 0.61  | 0.57 | 1 | HC_vs_MS.Trt_F |
| SLC22A23  | 0.32441 | 1.5538  | 0.101 | 0.08 | 1 | HC_vs_MS.Trt_F |
| CEP78     | 0.3253  | 0.79116 | 0.592 | 0.52 | 1 | HC_vs_MS.Trt_F |
| TRIM66    | 0.32538 | -0.3045 | 0.523 | 0.49 | 1 | HC_vs_MS.Trt_F |
| VPS29     | 0.32588 | -0.3339 | 0.535 | 0.48 | 1 | HC_vs_MS.Trt_F |
| TTC34     | 0.32695 | 0.44283 | 0.217 | 0.18 | 1 | HC_vs_MS.Trt_F |

|            |         |         |       |      |   |                |
|------------|---------|---------|-------|------|---|----------------|
| AHSA2      | 0.32745 | 0.27373 | 0.283 | 0.24 | 1 | HC_vs_MS.Trt_F |
| ADPRH      | 0.32753 | -0.3831 | 0.081 | 0.1  | 1 | HC_vs_MS.Trt_F |
| JARID2     | 0.32757 | -0.6718 | 0.26  | 0.21 | 1 | HC_vs_MS.Trt_F |
| GTF2H4     | 0.3278  | -0.2915 | 0.113 | 0.14 | 1 | HC_vs_MS.Trt_F |
| SEC22A     | 0.32806 | -0.3934 | 0.702 | 0.64 | 1 | HC_vs_MS.Trt_F |
| TMF1       | 0.32852 | -0.2549 | 0.228 | 0.19 | 1 | HC_vs_MS.Trt_F |
| TBXAS1     | 0.32857 | 0.68399 | 0.434 | 0.39 | 1 | HC_vs_MS.Trt_F |
| ICE1       | 0.32861 | -0.3817 | 0.118 | 0.14 | 1 | HC_vs_MS.Trt_F |
| C1GALT1    | 0.32864 | -0.4397 | 0.613 | 0.6  | 1 | HC_vs_MS.Trt_F |
| NDUFS6     | 0.32868 | -0.4486 | 0.171 | 0.14 | 1 | HC_vs_MS.Trt_F |
| IL13RA1    | 0.32893 | 0.32397 | 0.329 | 0.28 | 1 | HC_vs_MS.Trt_F |
| B3GNT2     | 0.3292  | 0.25199 | 0.188 | 0.16 | 1 | HC_vs_MS.Trt_F |
| PARG       | 0.32938 | -0.8664 | 0.188 | 0.16 | 1 | HC_vs_MS.Trt_F |
| PIP5KL1    | 0.32958 | 0.3167  | 0.503 | 0.5  | 1 | HC_vs_MS.Trt_F |
| DNAJC27    | 0.32958 | 0.41016 | 0.104 | 0.08 | 1 | HC_vs_MS.Trt_F |
| ABCF2      | 0.32984 | 0.53658 | 0.303 | 0.26 | 1 | HC_vs_MS.Trt_F |
| NR1H2      | 0.32985 | 0.28286 | 0.564 | 0.51 | 1 | HC_vs_MS.Trt_F |
| ADAMTS1    | 0.32992 | -0.2997 | 0.5   | 0.44 | 1 | HC_vs_MS.Trt_F |
| POGLUT1    | 0.3302  | -0.2588 | 0.269 | 0.3  | 1 | HC_vs_MS.Trt_F |
| FAM188B    | 0.3303  | 0.70504 | 0.182 | 0.16 | 1 | HC_vs_MS.Trt_F |
| ATP5J      | 0.33069 | -1.073  | 0.225 | 0.24 | 1 | HC_vs_MS.Trt_F |
| STARD9     | 0.33082 | 0.25653 | 0.931 | 0.9  | 1 | HC_vs_MS.Trt_F |
| STK16      | 0.33116 | -0.4792 | 0.092 | 0.12 | 1 | HC_vs_MS.Trt_F |
| LEMD2      | 0.33126 | 1.08625 | 0.118 | 0.09 | 1 | HC_vs_MS.Trt_F |
| ZSCAN2     | 0.33223 | 0.49022 | 0.829 | 0.76 | 1 | HC_vs_MS.Trt_F |
| RNFT1      | 0.33234 | -0.359  | 0.442 | 0.39 | 1 | HC_vs_MS.Trt_F |
| NOL10      | 0.33251 | 0.59246 | 0.202 | 0.17 | 1 | HC_vs_MS.Trt_F |
| TRIM33     | 0.33283 | 0.26355 | 0.396 | 0.36 | 1 | HC_vs_MS.Trt_F |
| CTD-2331H1 | 0.33285 | -0.748  | 0.217 | 0.25 | 1 | HC_vs_MS.Trt_F |
| TDG        | 0.33314 | 0.58069 | 0.35  | 0.33 | 1 | HC_vs_MS.Trt_F |
| HSBP1      | 0.33336 | -0.6068 | 0.639 | 0.64 | 1 | HC_vs_MS.Trt_F |
| RBM47      | 0.33337 | 0.37089 | 0.494 | 0.44 | 1 | HC_vs_MS.Trt_F |
| TMEM55B    | 0.33351 | 0.87583 | 0.113 | 0.09 | 1 | HC_vs_MS.Trt_F |
| VRK1       | 0.33414 | 0.74051 | 0.231 | 0.2  | 1 | HC_vs_MS.Trt_F |
| SRSF9      | 0.33466 | -0.6842 | 0.156 | 0.18 | 1 | HC_vs_MS.Trt_F |
| ZDHHC17    | 0.33477 | 0.82229 | 0.341 | 0.31 | 1 | HC_vs_MS.Trt_F |
| TMEM147    | 0.33492 | -0.403  | 0.165 | 0.13 | 1 | HC_vs_MS.Trt_F |
| ZNF22      | 0.33518 | 0.6641  | 0.118 | 0.09 | 1 | HC_vs_MS.Trt_F |
| TRPS1      | 0.33563 | 1.54946 | 0.127 | 0.1  | 1 | HC_vs_MS.Trt_F |
| BLVRA      | 0.33597 | 0.34239 | 0.156 | 0.13 | 1 | HC_vs_MS.Trt_F |

|           |         |         |       |      |   |                |
|-----------|---------|---------|-------|------|---|----------------|
| PLCH2     | 0.33619 | 1.49775 | 0.104 | 0.08 | 1 | HC_vs_MS.Trt_F |
| MKKS      | 0.33626 | -0.7546 | 0.104 | 0.13 | 1 | HC_vs_MS.Trt_F |
| MEGF8     | 0.33635 | 0.33127 | 0.532 | 0.51 | 1 | HC_vs_MS.Trt_F |
| TRIM38    | 0.3365  | 0.25311 | 0.905 | 0.85 | 1 | HC_vs_MS.Trt_F |
| CAB39     | 0.33659 | -0.5254 | 0.329 | 0.28 | 1 | HC_vs_MS.Trt_F |
| RAD17     | 0.33684 | -0.7338 | 0.471 | 0.42 | 1 | HC_vs_MS.Trt_F |
| IFITM1    | 0.33744 | -0.2511 | 0.546 | 0.55 | 1 | HC_vs_MS.Trt_F |
| RAB10     | 0.33814 | -0.7868 | 0.225 | 0.24 | 1 | HC_vs_MS.Trt_F |
| SLC16A6   | 0.33822 | -0.9454 | 0.275 | 0.23 | 1 | HC_vs_MS.Trt_F |
| TGDS      | 0.33834 | -0.5368 | 0.098 | 0.12 | 1 | HC_vs_MS.Trt_F |
| CP        | 0.33865 | -1.7015 | 0.15  | 0.12 | 1 | HC_vs_MS.Trt_F |
| FAM181B   | 0.33922 | 0.25888 | 0.13  | 0.11 | 1 | HC_vs_MS.Trt_F |
| RNF180    | 0.33937 | -0.5564 | 0.35  | 0.31 | 1 | HC_vs_MS.Trt_F |
| MYB       | 0.33943 | 0.3182  | 0.364 | 0.32 | 1 | HC_vs_MS.Trt_F |
| PFAS      | 0.33962 | -0.893  | 0.662 | 0.6  | 1 | HC_vs_MS.Trt_F |
| DNAJC11   | 0.33972 | 0.61709 | 0.22  | 0.19 | 1 | HC_vs_MS.Trt_F |
| XXYL1     | 0.33974 | -0.6644 | 0.217 | 0.18 | 1 | HC_vs_MS.Trt_F |
| HLTF      | 0.33988 | 1.16363 | 0.494 | 0.44 | 1 | HC_vs_MS.Trt_F |
| NPAS3     | 0.3399  | 0.56781 | 0.448 | 0.4  | 1 | HC_vs_MS.Trt_F |
| L3HYPDH   | 0.33995 | -0.5402 | 0.208 | 0.18 | 1 | HC_vs_MS.Trt_F |
| OPA3      | 0.34007 | 0.33925 | 0.977 | 0.96 | 1 | HC_vs_MS.Trt_F |
| DLGAP1    | 0.34011 | -0.4898 | 0.379 | 0.38 | 1 | HC_vs_MS.Trt_F |
| MAGEH1    | 0.34065 | 0.46261 | 0.11  | 0.09 | 1 | HC_vs_MS.Trt_F |
| RBM14-RBM | 0.34067 | 0.3436  | 0.139 | 0.11 | 1 | HC_vs_MS.Trt_F |
| TMEM159   | 0.34081 | 0.26625 | 0.61  | 0.62 | 1 | HC_vs_MS.Trt_F |
| B3GNT4    | 0.34083 | -0.7979 | 0.127 | 0.16 | 1 | HC_vs_MS.Trt_F |
| DCLRE1C   | 0.34118 | -0.5804 | 0.717 | 0.69 | 1 | HC_vs_MS.Trt_F |
| ZNF177    | 0.34121 | 0.51412 | 0.107 | 0.13 | 1 | HC_vs_MS.Trt_F |
| SNRPE     | 0.34125 | -0.4369 | 0.159 | 0.13 | 1 | HC_vs_MS.Trt_F |
| RPS6KC1   | 0.34127 | 0.87231 | 0.121 | 0.1  | 1 | HC_vs_MS.Trt_F |
| DERL2     | 0.34147 | -0.3664 | 0.341 | 0.3  | 1 | HC_vs_MS.Trt_F |
| UVRAG     | 0.34168 | 0.38042 | 0.41  | 0.36 | 1 | HC_vs_MS.Trt_F |
| ID2       | 0.34171 | 0.5743  | 0.118 | 0.1  | 1 | HC_vs_MS.Trt_F |
| FKBP3     | 0.34182 | -0.4023 | 0.301 | 0.25 | 1 | HC_vs_MS.Trt_F |
| ERCC4     | 0.34211 | 0.38048 | 0.884 | 0.89 | 1 | HC_vs_MS.Trt_F |
| PRC1      | 0.34226 | -0.3906 | 0.61  | 0.55 | 1 | HC_vs_MS.Trt_F |
| MTMR4     | 0.34234 | 0.66063 | 0.298 | 0.26 | 1 | HC_vs_MS.Trt_F |
| CTNS      | 0.34248 | 0.65076 | 0.182 | 0.16 | 1 | HC_vs_MS.Trt_F |
| DDX54     | 0.34274 | -0.6522 | 0.139 | 0.16 | 1 | HC_vs_MS.Trt_F |
| CCDC88B   | 0.34309 | 0.55042 | 0.766 | 0.83 | 1 | HC_vs_MS.Trt_F |

|            |         |         |       |      |   |                |
|------------|---------|---------|-------|------|---|----------------|
| DDRGK1     | 0.3435  | -0.4539 | 0.173 | 0.14 | 1 | HC_vs_MS.Trt_F |
| MRPS18A    | 0.34362 | -0.5856 | 0.139 | 0.11 | 1 | HC_vs_MS.Trt_F |
| SLC26A2    | 0.34373 | 0.53089 | 0.775 | 0.76 | 1 | HC_vs_MS.Trt_F |
| AHCTF1     | 0.34381 | -0.5281 | 0.171 | 0.14 | 1 | HC_vs_MS.Trt_F |
| C4orf33    | 0.34433 | -0.9936 | 0.101 | 0.08 | 1 | HC_vs_MS.Trt_F |
| C11orf71   | 0.3445  | -0.3654 | 0.118 | 0.09 | 1 | HC_vs_MS.Trt_F |
| ANTXRL     | 0.34456 | 0.28857 | 0.208 | 0.17 | 1 | HC_vs_MS.Trt_F |
| ADAMTS17   | 0.34464 | -0.2674 | 0.217 | 0.18 | 1 | HC_vs_MS.Trt_F |
| TCIRG1     | 0.34466 | -0.3104 | 0.315 | 0.33 | 1 | HC_vs_MS.Trt_F |
| COQ9       | 0.3448  | -0.9575 | 0.113 | 0.13 | 1 | HC_vs_MS.Trt_F |
| PRKD2      | 0.34483 | -0.3664 | 0.769 | 0.75 | 1 | HC_vs_MS.Trt_F |
| HNRNPUL2-1 | 0.34494 | -0.3603 | 0.127 | 0.1  | 1 | HC_vs_MS.Trt_F |
| PHF7       | 0.34505 | 0.76392 | 0.523 | 0.47 | 1 | HC_vs_MS.Trt_F |
| DHRS4L2    | 0.34523 | -0.7811 | 0.191 | 0.21 | 1 | HC_vs_MS.Trt_F |
| AASS       | 0.34578 | -0.4284 | 0.422 | 0.35 | 1 | HC_vs_MS.Trt_F |
| DNAJB13    | 0.34583 | 0.29396 | 0.419 | 0.38 | 1 | HC_vs_MS.Trt_F |
| BCR        | 0.34644 | -0.959  | 0.341 | 0.29 | 1 | HC_vs_MS.Trt_F |
| SUCLG1     | 0.34662 | -0.5997 | 0.425 | 0.44 | 1 | HC_vs_MS.Trt_F |
| CTD-2021K4 | 0.34692 | -0.6261 | 0.095 | 0.12 | 1 | HC_vs_MS.Trt_F |
| MS4A6A     | 0.34703 | 1.17101 | 0.202 | 0.18 | 1 | HC_vs_MS.Trt_F |
| CD3E       | 0.34712 | 0.44158 | 0.671 | 0.63 | 1 | HC_vs_MS.Trt_F |
| REXO2      | 0.3474  | -0.566  | 0.185 | 0.21 | 1 | HC_vs_MS.Trt_F |
| ANKFY1     | 0.34756 | 0.69729 | 0.697 | 0.65 | 1 | HC_vs_MS.Trt_F |
| IMMP2L     | 0.34779 | 0.67641 | 0.127 | 0.1  | 1 | HC_vs_MS.Trt_F |
| MTMR12     | 0.34827 | 0.56006 | 0.488 | 0.45 | 1 | HC_vs_MS.Trt_F |
| CR1        | 0.34841 | 0.83555 | 0.618 | 0.54 | 1 | HC_vs_MS.Trt_F |
| ACOT13     | 0.34846 | 0.52417 | 0.408 | 0.37 | 1 | HC_vs_MS.Trt_F |
| CHD8       | 0.3485  | 0.80149 | 0.399 | 0.36 | 1 | HC_vs_MS.Trt_F |
| FUCA2      | 0.34891 | -0.6141 | 0.335 | 0.29 | 1 | HC_vs_MS.Trt_F |
| AGTPBP1    | 0.34894 | -0.5437 | 0.202 | 0.17 | 1 | HC_vs_MS.Trt_F |
| CA13       | 0.34904 | -0.4537 | 0.601 | 0.54 | 1 | HC_vs_MS.Trt_F |
| RNF20      | 0.34936 | 0.44647 | 0.15  | 0.12 | 1 | HC_vs_MS.Trt_F |
| FAM234B    | 0.34944 | -0.3019 | 0.506 | 0.45 | 1 | HC_vs_MS.Trt_F |
| ABAT       | 0.34999 | 0.25136 | 0.656 | 0.61 | 1 | HC_vs_MS.Trt_F |
| AP5M1      | 0.35003 | -0.4635 | 0.159 | 0.18 | 1 | HC_vs_MS.Trt_F |
| MBTPS1     | 0.35023 | -0.3668 | 0.555 | 0.57 | 1 | HC_vs_MS.Trt_F |
| COLGALT1   | 0.35024 | -0.2861 | 0.523 | 0.47 | 1 | HC_vs_MS.Trt_F |
| CPSF7      | 0.35027 | 0.38611 | 0.22  | 0.19 | 1 | HC_vs_MS.Trt_F |
| PPP1CC     | 0.35038 | 0.34555 | 0.786 | 0.76 | 1 | HC_vs_MS.Trt_F |
| COQ10B     | 0.3504  | -0.6224 | 0.688 | 0.6  | 1 | HC_vs_MS.Trt_F |

|          |         |         |       |      |   |                |
|----------|---------|---------|-------|------|---|----------------|
| IL17RD   | 0.35076 | -0.4864 | 0.636 | 0.59 | 1 | HC_vs_MS.Trt_F |
| GAREM1   | 0.35084 | 0.4851  | 0.078 | 0.1  | 1 | HC_vs_MS.Trt_F |
| DAD1     | 0.35119 | -0.4175 | 0.41  | 0.32 | 1 | HC_vs_MS.Trt_F |
| TMUB2    | 0.35161 | 0.30972 | 0.882 | 0.85 | 1 | HC_vs_MS.Trt_F |
| TMEM175  | 0.35168 | -0.3147 | 0.318 | 0.35 | 1 | HC_vs_MS.Trt_F |
| RIOK3    | 0.35191 | 0.2702  | 0.575 | 0.54 | 1 | HC_vs_MS.Trt_F |
| PLA2G4B  | 0.35192 | -0.8016 | 0.52  | 0.47 | 1 | HC_vs_MS.Trt_F |
| MAN1B1   | 0.35193 | 0.43851 | 0.329 | 0.28 | 1 | HC_vs_MS.Trt_F |
| TXNL4B   | 0.35249 | -0.7842 | 0.41  | 0.35 | 1 | HC_vs_MS.Trt_F |
| CBX7     | 0.35278 | -0.6062 | 0.361 | 0.38 | 1 | HC_vs_MS.Trt_F |
| DPH5     | 0.35281 | 0.32604 | 0.361 | 0.32 | 1 | HC_vs_MS.Trt_F |
| IDH2     | 0.35281 | -0.3242 | 0.587 | 0.51 | 1 | HC_vs_MS.Trt_F |
| TMEM168  | 0.35284 | -0.5539 | 0.592 | 0.54 | 1 | HC_vs_MS.Trt_F |
| WDR19    | 0.35335 | 1.00217 | 0.601 | 0.57 | 1 | HC_vs_MS.Trt_F |
| SMAGP    | 0.35383 | -0.4536 | 0.636 | 0.62 | 1 | HC_vs_MS.Trt_F |
| TRIM13   | 0.35407 | -0.3546 | 0.682 | 0.61 | 1 | HC_vs_MS.Trt_F |
| KAZN     | 0.3548  | 0.74675 | 0.558 | 0.49 | 1 | HC_vs_MS.Trt_F |
| FAM103A1 | 0.35487 | -1.0442 | 0.156 | 0.18 | 1 | HC_vs_MS.Trt_F |
| CUL2     | 0.3552  | 0.34719 | 0.272 | 0.23 | 1 | HC_vs_MS.Trt_F |
| STX5     | 0.35553 | 0.94498 | 0.159 | 0.13 | 1 | HC_vs_MS.Trt_F |
| ABHD10   | 0.35613 | -1.0118 | 0.116 | 0.14 | 1 | HC_vs_MS.Trt_F |
| YWHAG    | 0.35628 | 0.30467 | 0.145 | 0.12 | 1 | HC_vs_MS.Trt_F |
| RIT1     | 0.35649 | -0.5966 | 0.477 | 0.42 | 1 | HC_vs_MS.Trt_F |
| CC2D1B   | 0.3572  | 0.40855 | 0.65  | 0.64 | 1 | HC_vs_MS.Trt_F |
| TIMM8B   | 0.35753 | -0.5985 | 0.118 | 0.09 | 1 | HC_vs_MS.Trt_F |
| PRKAA1   | 0.35901 | 0.56265 | 0.902 | 0.86 | 1 | HC_vs_MS.Trt_F |
| SARNP    | 0.35929 | -0.5826 | 0.61  | 0.58 | 1 | HC_vs_MS.Trt_F |
| ANXA4    | 0.35939 | -0.3858 | 0.882 | 0.86 | 1 | HC_vs_MS.Trt_F |
| DNAJB5   | 0.3595  | -0.549  | 0.231 | 0.2  | 1 | HC_vs_MS.Trt_F |
| MCRIP2   | 0.35965 | -0.288  | 0.598 | 0.56 | 1 | HC_vs_MS.Trt_F |
| AKT1S1   | 0.35967 | -0.5018 | 0.22  | 0.18 | 1 | HC_vs_MS.Trt_F |
| PFDN4    | 0.35991 | -0.8159 | 0.098 | 0.12 | 1 | HC_vs_MS.Trt_F |
| SBNO2    | 0.36023 | 0.78389 | 0.228 | 0.19 | 1 | HC_vs_MS.Trt_F |
| MAP1B    | 0.36034 | -1.3962 | 0.101 | 0.08 | 1 | HC_vs_MS.Trt_F |
| ERH      | 0.36047 | -0.2691 | 0.223 | 0.18 | 1 | HC_vs_MS.Trt_F |
| CHIC1    | 0.36052 | 0.70407 | 0.107 | 0.09 | 1 | HC_vs_MS.Trt_F |
| ADI1     | 0.36114 | -0.2772 | 0.824 | 0.78 | 1 | HC_vs_MS.Trt_F |
| RTCB     | 0.36125 | -0.6001 | 0.147 | 0.17 | 1 | HC_vs_MS.Trt_F |
| NETO2    | 0.36173 | -0.3809 | 0.587 | 0.6  | 1 | HC_vs_MS.Trt_F |
| PNPO     | 0.36176 | 0.25547 | 0.723 | 0.66 | 1 | HC_vs_MS.Trt_F |

|            |         |         |       |      |   |                |
|------------|---------|---------|-------|------|---|----------------|
| MED24      | 0.3618  | 0.60726 | 0.636 | 0.61 | 1 | HC_vs_MS.Trt_F |
| DYRK1A     | 0.36186 | 0.68943 | 0.751 | 0.7  | 1 | HC_vs_MS.Trt_F |
| LEKR1      | 0.3625  | -0.3239 | 0.176 | 0.2  | 1 | HC_vs_MS.Trt_F |
| USP30      | 0.36251 | 0.41431 | 0.266 | 0.3  | 1 | HC_vs_MS.Trt_F |
| CEP112     | 0.36271 | 0.34165 | 0.948 | 0.91 | 1 | HC_vs_MS.Trt_F |
| PUS3       | 0.36294 | 0.56572 | 0.358 | 0.31 | 1 | HC_vs_MS.Trt_F |
| SV2A       | 0.36322 | 0.4304  | 0.355 | 0.33 | 1 | HC_vs_MS.Trt_F |
| PTRHD1     | 0.36331 | -0.2672 | 0.277 | 0.24 | 1 | HC_vs_MS.Trt_F |
| SPA17      | 0.36393 | -0.3471 | 0.295 | 0.25 | 1 | HC_vs_MS.Trt_F |
| DCUN1D3    | 0.36406 | 0.87706 | 0.231 | 0.2  | 1 | HC_vs_MS.Trt_F |
| KAT5       | 0.36409 | -0.4916 | 0.191 | 0.16 | 1 | HC_vs_MS.Trt_F |
| VPS11      | 0.3644  | -0.4791 | 0.847 | 0.81 | 1 | HC_vs_MS.Trt_F |
| ATG14      | 0.36461 | 0.45997 | 0.72  | 0.71 | 1 | HC_vs_MS.Trt_F |
| CARNMT1    | 0.36497 | -0.4918 | 0.145 | 0.12 | 1 | HC_vs_MS.Trt_F |
| SDHB       | 0.36499 | 0.46056 | 0.176 | 0.15 | 1 | HC_vs_MS.Trt_F |
| CNR2       | 0.36507 | 0.55674 | 0.844 | 0.82 | 1 | HC_vs_MS.Trt_F |
| NSA2       | 0.3651  | -0.4286 | 0.335 | 0.37 | 1 | HC_vs_MS.Trt_F |
| SLC25A29   | 0.36514 | 0.79624 | 0.387 | 0.35 | 1 | HC_vs_MS.Trt_F |
| VASH1      | 0.36543 | -0.6703 | 0.116 | 0.09 | 1 | HC_vs_MS.Trt_F |
| SLC13A4    | 0.36571 | 1.23861 | 0.373 | 0.35 | 1 | HC_vs_MS.Trt_F |
| UGT8       | 0.36601 | -0.3916 | 0.546 | 0.46 | 1 | HC_vs_MS.Trt_F |
| TENM1      | 0.36617 | 1.2659  | 0.139 | 0.12 | 1 | HC_vs_MS.Trt_F |
| UBAP2      | 0.36633 | 0.29813 | 0.749 | 0.68 | 1 | HC_vs_MS.Trt_F |
| C17orf51   | 0.36707 | -0.4767 | 0.408 | 0.36 | 1 | HC_vs_MS.Trt_F |
| LPAR6      | 0.36784 | -0.5934 | 0.416 | 0.42 | 1 | HC_vs_MS.Trt_F |
| DHDDS      | 0.36792 | -0.4086 | 0.618 | 0.55 | 1 | HC_vs_MS.Trt_F |
| ZNF334     | 0.36807 | 0.76682 | 0.142 | 0.12 | 1 | HC_vs_MS.Trt_F |
| ZNF251     | 0.36832 | -0.3183 | 0.292 | 0.26 | 1 | HC_vs_MS.Trt_F |
| EPHA1      | 0.36844 | 0.43925 | 0.39  | 0.36 | 1 | HC_vs_MS.Trt_F |
| SLC15A2    | 0.36857 | -0.4058 | 0.543 | 0.49 | 1 | HC_vs_MS.Trt_F |
| XPO7       | 0.36867 | -0.4602 | 0.142 | 0.12 | 1 | HC_vs_MS.Trt_F |
| NME2       | 0.36893 | -0.4152 | 0.486 | 0.5  | 1 | HC_vs_MS.Trt_F |
| GPR157     | 0.36899 | 0.3301  | 0.847 | 0.8  | 1 | HC_vs_MS.Trt_F |
| ABC13-4748 | 0.36939 | 0.64602 | 0.101 | 0.08 | 1 | HC_vs_MS.Trt_F |
| MCM7       | 0.36951 | -0.752  | 0.153 | 0.17 | 1 | HC_vs_MS.Trt_F |
| MAP3K7CL   | 0.36961 | 0.27609 | 0.465 | 0.42 | 1 | HC_vs_MS.Trt_F |
| GTF3C6     | 0.36964 | -0.489  | 0.199 | 0.16 | 1 | HC_vs_MS.Trt_F |
| CMIP       | 0.3697  | 0.74205 | 0.11  | 0.09 | 1 | HC_vs_MS.Trt_F |
| GEMIN7     | 0.36982 | -0.6877 | 0.22  | 0.18 | 1 | HC_vs_MS.Trt_F |
| IFT172     | 0.37007 | 0.72789 | 0.65  | 0.59 | 1 | HC_vs_MS.Trt_F |

|            |         |         |       |      |   |                |
|------------|---------|---------|-------|------|---|----------------|
| ZNF365     | 0.37033 | -0.7188 | 0.35  | 0.31 | 1 | HC_vs_MS.Trt_F |
| TMEM170A   | 0.37093 | -0.262  | 0.861 | 0.83 | 1 | HC_vs_MS.Trt_F |
| SENP5      | 0.37106 | -0.5768 | 0.939 | 0.92 | 1 | HC_vs_MS.Trt_F |
| SETD2      | 0.37106 | -0.3415 | 0.399 | 0.34 | 1 | HC_vs_MS.Trt_F |
| ZNF701     | 0.37106 | -0.4371 | 0.477 | 0.44 | 1 | HC_vs_MS.Trt_F |
| PLPP5      | 0.37144 | -0.369  | 0.864 | 0.88 | 1 | HC_vs_MS.Trt_F |
| CCDC12     | 0.37153 | -0.3003 | 0.254 | 0.28 | 1 | HC_vs_MS.Trt_F |
| DGCR2      | 0.37159 | 0.27717 | 0.257 | 0.23 | 1 | HC_vs_MS.Trt_F |
| MASP2      | 0.3716  | -1.0593 | 0.335 | 0.3  | 1 | HC_vs_MS.Trt_F |
| DISP1      | 0.37167 | 1.26472 | 0.121 | 0.1  | 1 | HC_vs_MS.Trt_F |
| ZCCHC7     | 0.37188 | 0.40789 | 0.332 | 0.3  | 1 | HC_vs_MS.Trt_F |
| PIGS       | 0.37268 | -0.5346 | 0.514 | 0.53 | 1 | HC_vs_MS.Trt_F |
| ARMCX3     | 0.37286 | 0.71571 | 0.116 | 0.09 | 1 | HC_vs_MS.Trt_F |
| FBL        | 0.373   | -0.324  | 0.474 | 0.44 | 1 | HC_vs_MS.Trt_F |
| SLC39A7    | 0.37302 | -0.4968 | 0.113 | 0.13 | 1 | HC_vs_MS.Trt_F |
| METTL5     | 0.37311 | 0.48464 | 0.546 | 0.51 | 1 | HC_vs_MS.Trt_F |
| SAAL1      | 0.37316 | -0.4261 | 0.09  | 0.11 | 1 | HC_vs_MS.Trt_F |
| TCP11L1    | 0.37318 | 0.31269 | 0.199 | 0.23 | 1 | HC_vs_MS.Trt_F |
| CDCA3      | 0.37335 | -0.4607 | 0.575 | 0.57 | 1 | HC_vs_MS.Trt_F |
| JAGN1      | 0.37341 | -0.3025 | 0.11  | 0.13 | 1 | HC_vs_MS.Trt_F |
| ELP5       | 0.37345 | 1.01414 | 0.133 | 0.11 | 1 | HC_vs_MS.Trt_F |
| NFKB2      | 0.37351 | 1.18993 | 0.428 | 0.4  | 1 | HC_vs_MS.Trt_F |
| FBLN7      | 0.37357 | 0.66668 | 0.439 | 0.41 | 1 | HC_vs_MS.Trt_F |
| IRF2BPL    | 0.3736  | -0.3286 | 0.474 | 0.49 | 1 | HC_vs_MS.Trt_F |
| CCDC138    | 0.37368 | 0.6433  | 0.217 | 0.19 | 1 | HC_vs_MS.Trt_F |
| SEMA6D     | 0.37423 | 1.36796 | 0.147 | 0.13 | 1 | HC_vs_MS.Trt_F |
| RFX2       | 0.37444 | -0.3438 | 0.514 | 0.48 | 1 | HC_vs_MS.Trt_F |
| DRAM2      | 0.37453 | -0.2863 | 0.188 | 0.21 | 1 | HC_vs_MS.Trt_F |
| TSC22D2    | 0.37462 | -0.3816 | 0.488 | 0.44 | 1 | HC_vs_MS.Trt_F |
| GLRX3      | 0.37479 | -0.312  | 0.887 | 0.83 | 1 | HC_vs_MS.Trt_F |
| GNPTAB     | 0.37532 | -0.3111 | 0.74  | 0.67 | 1 | HC_vs_MS.Trt_F |
| ALKBH6     | 0.37542 | 0.29375 | 0.538 | 0.57 | 1 | HC_vs_MS.Trt_F |
| PPOX       | 0.37616 | -0.3883 | 0.263 | 0.23 | 1 | HC_vs_MS.Trt_F |
| DMWD       | 0.37647 | 0.52382 | 0.879 | 0.84 | 1 | HC_vs_MS.Trt_F |
| CTD-3105H1 | 0.37651 | 0.36826 | 0.358 | 0.31 | 1 | HC_vs_MS.Trt_F |
| SMC1A      | 0.37711 | 0.40707 | 0.263 | 0.23 | 1 | HC_vs_MS.Trt_F |
| STPG1      | 0.37767 | 0.45301 | 0.801 | 0.79 | 1 | HC_vs_MS.Trt_F |
| GDE1       | 0.37828 | 1.46721 | 0.315 | 0.28 | 1 | HC_vs_MS.Trt_F |
| PAN2       | 0.37856 | -0.5238 | 0.353 | 0.37 | 1 | HC_vs_MS.Trt_F |
| EBP        | 0.37883 | -0.3073 | 0.234 | 0.19 | 1 | HC_vs_MS.Trt_F |



|          |         |         |       |      |   |                |
|----------|---------|---------|-------|------|---|----------------|
| BGN      | 0.37889 | 1.55507 | 0.084 | 0.11 | 1 | HC_vs_MS.Trt_F |
| SPCS2    | 0.37891 | -0.4149 | 0.324 | 0.35 | 1 | HC_vs_MS.Trt_F |
| MLH1     | 0.37976 | 0.27439 | 0.39  | 0.36 | 1 | HC_vs_MS.Trt_F |
| TSG101   | 0.37991 | -0.5151 | 0.506 | 0.44 | 1 | HC_vs_MS.Trt_F |
| C2orf69  | 0.38001 | -0.4002 | 0.303 | 0.26 | 1 | HC_vs_MS.Trt_F |
| AZIN1    | 0.38042 | -0.2717 | 0.399 | 0.34 | 1 | HC_vs_MS.Trt_F |
| ADNP     | 0.38062 | -0.7614 | 0.483 | 0.43 | 1 | HC_vs_MS.Trt_F |
| PHF19    | 0.38072 | -0.4491 | 0.191 | 0.16 | 1 | HC_vs_MS.Trt_F |
| SRFBP1   | 0.38081 | -1.2217 | 0.471 | 0.46 | 1 | HC_vs_MS.Trt_F |
| ZNF696   | 0.38106 | -0.3647 | 0.344 | 0.36 | 1 | HC_vs_MS.Trt_F |
| GLRX5    | 0.38136 | -1.2549 | 0.101 | 0.12 | 1 | HC_vs_MS.Trt_F |
| TRIM28   | 0.38202 | 0.94737 | 0.113 | 0.09 | 1 | HC_vs_MS.Trt_F |
| CFAP20   | 0.38214 | -0.4783 | 0.162 | 0.18 | 1 | HC_vs_MS.Trt_F |
| ANKRD42  | 0.38243 | 1.09239 | 0.442 | 0.39 | 1 | HC_vs_MS.Trt_F |
| PGAM5    | 0.38262 | 0.33815 | 0.803 | 0.77 | 1 | HC_vs_MS.Trt_F |
| USP5     | 0.38264 | 0.69259 | 0.147 | 0.12 | 1 | HC_vs_MS.Trt_F |
| PNKP     | 0.38276 | 0.68333 | 0.327 | 0.3  | 1 | HC_vs_MS.Trt_F |
| ASNSD1   | 0.38322 | -0.5663 | 0.165 | 0.13 | 1 | HC_vs_MS.Trt_F |
| ZNF140   | 0.38353 | -1.4524 | 0.223 | 0.19 | 1 | HC_vs_MS.Trt_F |
| C1orf186 | 0.38366 | 0.97009 | 0.587 | 0.55 | 1 | HC_vs_MS.Trt_F |
| BEX3     | 0.38372 | -0.3226 | 0.145 | 0.12 | 1 | HC_vs_MS.Trt_F |
| SLC37A2  | 0.38377 | -0.3163 | 0.514 | 0.51 | 1 | HC_vs_MS.Trt_F |
| SH2D1A   | 0.3838  | -0.6895 | 0.292 | 0.24 | 1 | HC_vs_MS.Trt_F |
| VPS18    | 0.38395 | -0.644  | 0.251 | 0.23 | 1 | HC_vs_MS.Trt_F |
| SLC30A5  | 0.38396 | -0.4817 | 0.809 | 0.73 | 1 | HC_vs_MS.Trt_F |
| TRPM1    | 0.38397 | 0.77866 | 0.133 | 0.11 | 1 | HC_vs_MS.Trt_F |
| ATL3     | 0.38445 | -0.3491 | 0.838 | 0.81 | 1 | HC_vs_MS.Trt_F |
| TAL1     | 0.38446 | 0.43121 | 0.26  | 0.22 | 1 | HC_vs_MS.Trt_F |
| KIN      | 0.38458 | -0.3283 | 0.772 | 0.74 | 1 | HC_vs_MS.Trt_F |
| NOL6     | 0.38478 | 0.38529 | 0.431 | 0.38 | 1 | HC_vs_MS.Trt_F |
| CCAR2    | 0.38499 | -0.7096 | 0.272 | 0.23 | 1 | HC_vs_MS.Trt_F |
| ZNF514   | 0.38545 | 0.74818 | 0.642 | 0.59 | 1 | HC_vs_MS.Trt_F |
| UNG      | 0.38577 | -0.4657 | 0.24  | 0.21 | 1 | HC_vs_MS.Trt_F |
| RPF1     | 0.38603 | -0.3971 | 0.283 | 0.25 | 1 | HC_vs_MS.Trt_F |
| CHAMP1   | 0.38618 | 0.43868 | 0.673 | 0.64 | 1 | HC_vs_MS.Trt_F |
| PRKCI    | 0.38626 | -0.3294 | 0.419 | 0.36 | 1 | HC_vs_MS.Trt_F |
| PCDH9    | 0.38666 | 0.63727 | 0.691 | 0.67 | 1 | HC_vs_MS.Trt_F |
| NME9     | 0.38706 | -0.709  | 0.275 | 0.24 | 1 | HC_vs_MS.Trt_F |
| JCHAIN   | 0.38717 | -3.1749 | 0.11  | 0.13 | 1 | HC_vs_MS.Trt_F |
| HSF2     | 0.38728 | -0.5843 | 0.142 | 0.12 | 1 | HC_vs_MS.Trt_F |

|          |         |         |       |      |   |                |
|----------|---------|---------|-------|------|---|----------------|
| DHRS11   | 0.38846 | 0.95057 | 0.344 | 0.29 | 1 | HC_vs_MS.Trt_F |
| BNIP1    | 0.38858 | -1.9509 | 0.087 | 0.1  | 1 | HC_vs_MS.Trt_F |
| ZNF235   | 0.38916 | -1.4359 | 0.159 | 0.13 | 1 | HC_vs_MS.Trt_F |
| LUC7L    | 0.38935 | 0.58983 | 0.864 | 0.85 | 1 | HC_vs_MS.Trt_F |
| ZFYVE27  | 0.38957 | 0.36948 | 0.225 | 0.19 | 1 | HC_vs_MS.Trt_F |
| CSNK2A2  | 0.39024 | -0.4207 | 0.344 | 0.29 | 1 | HC_vs_MS.Trt_F |
| YES1     | 0.39034 | -0.368  | 0.347 | 0.37 | 1 | HC_vs_MS.Trt_F |
| NFS1     | 0.39052 | -0.9974 | 0.934 | 0.91 | 1 | HC_vs_MS.Trt_F |
| ZNF14    | 0.39056 | -0.6055 | 0.387 | 0.4  | 1 | HC_vs_MS.Trt_F |
| PDE8A    | 0.39072 | 0.29125 | 0.526 | 0.46 | 1 | HC_vs_MS.Trt_F |
| HSDL2    | 0.39105 | -0.5903 | 0.185 | 0.16 | 1 | HC_vs_MS.Trt_F |
| RECK     | 0.39147 | 0.27603 | 0.188 | 0.16 | 1 | HC_vs_MS.Trt_F |
| C19orf44 | 0.39195 | 0.59824 | 0.387 | 0.35 | 1 | HC_vs_MS.Trt_F |
| DLEC1    | 0.39232 | 1.4864  | 0.514 | 0.46 | 1 | HC_vs_MS.Trt_F |
| DEF6     | 0.39251 | -0.4752 | 0.428 | 0.43 | 1 | HC_vs_MS.Trt_F |
| EXO1     | 0.39302 | 0.42983 | 0.197 | 0.23 | 1 | HC_vs_MS.Trt_F |
| C5orf63  | 0.39368 | -0.4026 | 0.393 | 0.35 | 1 | HC_vs_MS.Trt_F |
| PIGW     | 0.39388 | 1.03497 | 0.477 | 0.44 | 1 | HC_vs_MS.Trt_F |
| HELZ2    | 0.3942  | -0.4383 | 0.699 | 0.64 | 1 | HC_vs_MS.Trt_F |
| BCS1L    | 0.39422 | -0.3337 | 0.09  | 0.11 | 1 | HC_vs_MS.Trt_F |
| USP22    | 0.39433 | -0.4591 | 0.847 | 0.82 | 1 | HC_vs_MS.Trt_F |
| FAM105A  | 0.39444 | -0.287  | 0.28  | 0.25 | 1 | HC_vs_MS.Trt_F |
| SEPP1    | 0.39449 | 0.46743 | 0.188 | 0.16 | 1 | HC_vs_MS.Trt_F |
| ZNF600   | 0.39486 | 0.79763 | 0.231 | 0.2  | 1 | HC_vs_MS.Trt_F |
| DHX35    | 0.39498 | 0.4032  | 0.422 | 0.39 | 1 | HC_vs_MS.Trt_F |
| TC2N     | 0.39501 | 0.30925 | 0.211 | 0.18 | 1 | HC_vs_MS.Trt_F |
| FKBP8    | 0.39511 | 1.35329 | 0.234 | 0.2  | 1 | HC_vs_MS.Trt_F |
| DHX40    | 0.39523 | -0.4454 | 0.147 | 0.12 | 1 | HC_vs_MS.Trt_F |
| NAALADL2 | 0.39527 | 0.31968 | 0.092 | 0.12 | 1 | HC_vs_MS.Trt_F |
| ASB8     | 0.3957  | 0.3952  | 0.74  | 0.75 | 1 | HC_vs_MS.Trt_F |
| ANKRD11  | 0.39572 | -0.4065 | 0.306 | 0.26 | 1 | HC_vs_MS.Trt_F |
| ZNF687   | 0.39593 | 0.54468 | 0.65  | 0.64 | 1 | HC_vs_MS.Trt_F |
| IFIT2    | 0.39595 | -0.8543 | 0.116 | 0.09 | 1 | HC_vs_MS.Trt_F |
| PHF10    | 0.39608 | 1.21532 | 0.113 | 0.09 | 1 | HC_vs_MS.Trt_F |
| TMEM220  | 0.39633 | 0.38223 | 0.572 | 0.57 | 1 | HC_vs_MS.Trt_F |
| MAVS     | 0.39639 | 0.28495 | 0.962 | 0.95 | 1 | HC_vs_MS.Trt_F |
| SPOCD1   | 0.39659 | -0.4521 | 0.575 | 0.6  | 1 | HC_vs_MS.Trt_F |
| NDUFB3   | 0.39752 | -0.4759 | 0.199 | 0.22 | 1 | HC_vs_MS.Trt_F |
| PTP4A3   | 0.39772 | 0.50717 | 0.11  | 0.09 | 1 | HC_vs_MS.Trt_F |
| ZFYVE21  | 0.3978  | -0.7393 | 0.737 | 0.66 | 1 | HC_vs_MS.Trt_F |

|            |         |         |       |      |   |                |
|------------|---------|---------|-------|------|---|----------------|
| VAV3       | 0.39841 | 0.40579 | 0.592 | 0.6  | 1 | HC_vs_MS.Trt_F |
| STK40      | 0.39878 | -0.3566 | 0.136 | 0.11 | 1 | HC_vs_MS.Trt_F |
| PLXDC2     | 0.39887 | 0.79678 | 0.74  | 0.7  | 1 | HC_vs_MS.Trt_F |
| MED8       | 0.39902 | 0.94137 | 0.116 | 0.09 | 1 | HC_vs_MS.Trt_F |
| MRE11A     | 0.39913 | -0.8638 | 0.743 | 0.75 | 1 | HC_vs_MS.Trt_F |
| SWAP70     | 0.39914 | -1.8236 | 0.483 | 0.4  | 1 | HC_vs_MS.Trt_F |
| PRSS53     | 0.39954 | 1.41448 | 0.257 | 0.22 | 1 | HC_vs_MS.Trt_F |
| CCDC77     | 0.39971 | -0.411  | 0.714 | 0.63 | 1 | HC_vs_MS.Trt_F |
| SCAF4      | 0.3999  | -0.3214 | 0.28  | 0.24 | 1 | HC_vs_MS.Trt_F |
| TRMT6      | 0.40009 | -1.2812 | 0.118 | 0.14 | 1 | HC_vs_MS.Trt_F |
| HECA       | 0.40013 | -0.5608 | 0.546 | 0.5  | 1 | HC_vs_MS.Trt_F |
| E2F3       | 0.40016 | 0.28299 | 0.225 | 0.19 | 1 | HC_vs_MS.Trt_F |
| CBLL1      | 0.40021 | -0.2678 | 0.243 | 0.21 | 1 | HC_vs_MS.Trt_F |
| KLRK1      | 0.40053 | -0.5955 | 0.711 | 0.66 | 1 | HC_vs_MS.Trt_F |
| ANKRD46    | 0.40056 | 0.72015 | 0.223 | 0.2  | 1 | HC_vs_MS.Trt_F |
| MORC3      | 0.4006  | -0.3381 | 0.503 | 0.48 | 1 | HC_vs_MS.Trt_F |
| CDC16      | 0.40089 | -0.4273 | 0.159 | 0.18 | 1 | HC_vs_MS.Trt_F |
| BAD        | 0.40109 | 0.33378 | 0.147 | 0.12 | 1 | HC_vs_MS.Trt_F |
| ARRDC2     | 0.40139 | 0.32164 | 0.15  | 0.13 | 1 | HC_vs_MS.Trt_F |
| SAE1       | 0.40177 | -0.3065 | 0.22  | 0.19 | 1 | HC_vs_MS.Trt_F |
| RINL       | 0.40211 | 0.36594 | 0.763 | 0.74 | 1 | HC_vs_MS.Trt_F |
| ZBTB21     | 0.40215 | -0.6268 | 0.127 | 0.15 | 1 | HC_vs_MS.Trt_F |
| SGO1       | 0.40237 | -0.3473 | 0.543 | 0.52 | 1 | HC_vs_MS.Trt_F |
| NDUFC2-KC  | 0.40271 | -0.3677 | 0.092 | 0.11 | 1 | HC_vs_MS.Trt_F |
| PLEKHG4B   | 0.40304 | 0.48363 | 0.509 | 0.44 | 1 | HC_vs_MS.Trt_F |
| UBXN8      | 0.40314 | 0.74216 | 0.22  | 0.2  | 1 | HC_vs_MS.Trt_F |
| KALRN      | 0.40374 | 0.42165 | 0.329 | 0.3  | 1 | HC_vs_MS.Trt_F |
| LIPA       | 0.40405 | 0.8143  | 0.318 | 0.28 | 1 | HC_vs_MS.Trt_F |
| OXSM       | 0.40407 | -0.6782 | 0.153 | 0.13 | 1 | HC_vs_MS.Trt_F |
| SPHK1      | 0.40462 | -0.3425 | 0.223 | 0.19 | 1 | HC_vs_MS.Trt_F |
| AL078584.1 | 0.40478 | 0.346   | 0.471 | 0.42 | 1 | HC_vs_MS.Trt_F |
| SLF1       | 0.40495 | 0.61078 | 0.197 | 0.17 | 1 | HC_vs_MS.Trt_F |
| FKRP       | 0.40565 | -0.3742 | 0.702 | 0.65 | 1 | HC_vs_MS.Trt_F |
| NIN        | 0.40566 | -0.3792 | 0.199 | 0.22 | 1 | HC_vs_MS.Trt_F |
| CDK12      | 0.40576 | 0.39183 | 0.561 | 0.49 | 1 | HC_vs_MS.Trt_F |
| AQR        | 0.40586 | -0.2987 | 0.671 | 0.63 | 1 | HC_vs_MS.Trt_F |
| ASAH1      | 0.40604 | -0.3267 | 0.76  | 0.73 | 1 | HC_vs_MS.Trt_F |
| ZNF585A    | 0.4062  | -1.2435 | 0.353 | 0.36 | 1 | HC_vs_MS.Trt_F |
| GPR89A     | 0.40629 | -0.3411 | 0.48  | 0.43 | 1 | HC_vs_MS.Trt_F |
| BBS4       | 0.40629 | 0.33778 | 0.107 | 0.13 | 1 | HC_vs_MS.Trt_F |

|          |         |         |       |      |   |                |
|----------|---------|---------|-------|------|---|----------------|
| ABCC5    | 0.40634 | -0.6639 | 0.179 | 0.15 | 1 | HC_vs_MS.Trt_F |
| ARRDC1   | 0.40654 | -0.2855 | 0.306 | 0.27 | 1 | HC_vs_MS.Trt_F |
| CNN3     | 0.40696 | -0.362  | 0.289 | 0.26 | 1 | HC_vs_MS.Trt_F |
| LTBP4    | 0.40855 | 0.47252 | 0.561 | 0.5  | 1 | HC_vs_MS.Trt_F |
| TCEAL8   | 0.40871 | -0.4132 | 0.116 | 0.09 | 1 | HC_vs_MS.Trt_F |
| TRMT112  | 0.40879 | -0.4891 | 0.272 | 0.29 | 1 | HC_vs_MS.Trt_F |
| HRH2     | 0.40885 | 0.57601 | 0.136 | 0.12 | 1 | HC_vs_MS.Trt_F |
| ZNF433   | 0.4089  | -0.4583 | 0.185 | 0.16 | 1 | HC_vs_MS.Trt_F |
| ABHD6    | 0.40895 | -0.6853 | 0.532 | 0.49 | 1 | HC_vs_MS.Trt_F |
| IFIT5    | 0.40897 | -0.6682 | 0.104 | 0.08 | 1 | HC_vs_MS.Trt_F |
| H6PD     | 0.40923 | 0.41467 | 0.87  | 0.85 | 1 | HC_vs_MS.Trt_F |
| PCYOX1L  | 0.40974 | 1.29478 | 0.11  | 0.09 | 1 | HC_vs_MS.Trt_F |
| IL3RA    | 0.40988 | 0.89519 | 0.121 | 0.1  | 1 | HC_vs_MS.Trt_F |
| ARHGEF15 | 0.41023 | 1.00266 | 0.454 | 0.42 | 1 | HC_vs_MS.Trt_F |
| KCNK10   | 0.41032 | 0.28128 | 0.173 | 0.16 | 1 | HC_vs_MS.Trt_F |
| MRPL18   | 0.41062 | -1.3672 | 0.145 | 0.16 | 1 | HC_vs_MS.Trt_F |
| AP1AR    | 0.4108  | -0.5713 | 0.107 | 0.09 | 1 | HC_vs_MS.Trt_F |
| PCNA     | 0.41081 | -0.3679 | 0.121 | 0.1  | 1 | HC_vs_MS.Trt_F |
| THOC3    | 0.41102 | -0.2884 | 0.532 | 0.53 | 1 | HC_vs_MS.Trt_F |
| STK38L   | 0.41109 | -0.6831 | 0.702 | 0.66 | 1 | HC_vs_MS.Trt_F |
| AGO4     | 0.41137 | 0.99656 | 0.335 | 0.31 | 1 | HC_vs_MS.Trt_F |
| NAXE     | 0.41179 | -0.5121 | 0.162 | 0.13 | 1 | HC_vs_MS.Trt_F |
| ZNF135   | 0.41195 | -1.2483 | 0.486 | 0.43 | 1 | HC_vs_MS.Trt_F |
| SNX12    | 0.41247 | -0.3184 | 0.116 | 0.09 | 1 | HC_vs_MS.Trt_F |
| C12orf49 | 0.41273 | -0.4082 | 0.74  | 0.74 | 1 | HC_vs_MS.Trt_F |
| ASF1A    | 0.41277 | -0.8561 | 0.156 | 0.17 | 1 | HC_vs_MS.Trt_F |
| PCNX3    | 0.41335 | 0.40561 | 0.159 | 0.13 | 1 | HC_vs_MS.Trt_F |
| DCTPP1   | 0.41427 | -1.3482 | 0.095 | 0.11 | 1 | HC_vs_MS.Trt_F |
| PARVA    | 0.41427 | 0.43901 | 0.749 | 0.72 | 1 | HC_vs_MS.Trt_F |
| SETDB1   | 0.41442 | -0.4965 | 0.63  | 0.6  | 1 | HC_vs_MS.Trt_F |
| SEMA4B   | 0.41445 | -0.4352 | 0.376 | 0.35 | 1 | HC_vs_MS.Trt_F |
| NCR3LG1  | 0.41454 | 0.44308 | 0.084 | 0.1  | 1 | HC_vs_MS.Trt_F |
| TMEM39B  | 0.41475 | 0.46975 | 0.176 | 0.16 | 1 | HC_vs_MS.Trt_F |
| CKAP5    | 0.41475 | -0.4795 | 0.168 | 0.14 | 1 | HC_vs_MS.Trt_F |
| ERCC8    | 0.41537 | -0.6079 | 0.344 | 0.36 | 1 | HC_vs_MS.Trt_F |
| ZSWIM1   | 0.41543 | 0.37997 | 0.734 | 0.74 | 1 | HC_vs_MS.Trt_F |
| LRP1     | 0.41612 | 1.16693 | 0.344 | 0.31 | 1 | HC_vs_MS.Trt_F |
| RALGPS1  | 0.41624 | 0.9575  | 0.477 | 0.41 | 1 | HC_vs_MS.Trt_F |
| RPS6KB2  | 0.41642 | 0.27406 | 0.861 | 0.85 | 1 | HC_vs_MS.Trt_F |
| DPY19L4  | 0.4168  | 0.87318 | 0.572 | 0.53 | 1 | HC_vs_MS.Trt_F |

|            |         |         |       |      |   |                |
|------------|---------|---------|-------|------|---|----------------|
| PEX7       | 0.41703 | 0.91635 | 0.171 | 0.15 | 1 | HC_vs_MS.Trt_F |
| LINC00493  | 0.4172  | -0.3345 | 0.451 | 0.4  | 1 | HC_vs_MS.Trt_F |
| CCDC25     | 0.41721 | -1.3185 | 0.286 | 0.31 | 1 | HC_vs_MS.Trt_F |
| TCEB3      | 0.41725 | -0.5019 | 0.145 | 0.12 | 1 | HC_vs_MS.Trt_F |
| CFP        | 0.41758 | -1.1781 | 0.422 | 0.36 | 1 | HC_vs_MS.Trt_F |
| CREG2      | 0.41773 | -0.3308 | 0.746 | 0.69 | 1 | HC_vs_MS.Trt_F |
| PAK1       | 0.4181  | -1.2097 | 0.202 | 0.17 | 1 | HC_vs_MS.Trt_F |
| CEP95      | 0.41838 | -0.2783 | 0.419 | 0.45 | 1 | HC_vs_MS.Trt_F |
| MED17      | 0.41855 | 0.27262 | 0.957 | 0.93 | 1 | HC_vs_MS.Trt_F |
| ATP6AP1    | 0.41869 | 0.45623 | 0.483 | 0.46 | 1 | HC_vs_MS.Trt_F |
| TFE3       | 0.41877 | 0.49589 | 0.11  | 0.09 | 1 | HC_vs_MS.Trt_F |
| RNF185     | 0.419   | -0.6343 | 0.306 | 0.27 | 1 | HC_vs_MS.Trt_F |
| TRMT1L     | 0.41907 | 0.25587 | 0.124 | 0.1  | 1 | HC_vs_MS.Trt_F |
| PTGR1      | 0.41912 | 0.30087 | 0.639 | 0.6  | 1 | HC_vs_MS.Trt_F |
| NDUFA12    | 0.41921 | -0.6584 | 0.223 | 0.24 | 1 | HC_vs_MS.Trt_F |
| GPR132     | 0.42001 | 0.25096 | 0.419 | 0.38 | 1 | HC_vs_MS.Trt_F |
| TNFRSF25   | 0.42033 | -0.3643 | 0.717 | 0.68 | 1 | HC_vs_MS.Trt_F |
| CLASP1     | 0.4206  | 0.28423 | 0.312 | 0.27 | 1 | HC_vs_MS.Trt_F |
| ABCG8      | 0.42073 | 0.73532 | 0.633 | 0.59 | 1 | HC_vs_MS.Trt_F |
| FAM161B    | 0.42105 | -0.6933 | 0.379 | 0.4  | 1 | HC_vs_MS.Trt_F |
| KCTD20     | 0.42144 | -0.3884 | 0.685 | 0.7  | 1 | HC_vs_MS.Trt_F |
| CLEC4E     | 0.42151 | 0.64257 | 0.425 | 0.39 | 1 | HC_vs_MS.Trt_F |
| FTSJ1      | 0.42228 | -0.2527 | 0.168 | 0.14 | 1 | HC_vs_MS.Trt_F |
| SLIT1      | 0.42251 | 0.90024 | 0.277 | 0.25 | 1 | HC_vs_MS.Trt_F |
| LCORL      | 0.42264 | -0.3557 | 0.136 | 0.11 | 1 | HC_vs_MS.Trt_F |
| CHKB       | 0.42282 | 0.36537 | 0.277 | 0.25 | 1 | HC_vs_MS.Trt_F |
| AGPAT5     | 0.42316 | -1.1419 | 0.127 | 0.15 | 1 | HC_vs_MS.Trt_F |
| USP48      | 0.42333 | -0.4832 | 0.552 | 0.57 | 1 | HC_vs_MS.Trt_F |
| UBE2V1     | 0.42374 | -0.2562 | 0.483 | 0.42 | 1 | HC_vs_MS.Trt_F |
| FCER1G     | 0.42387 | 0.30646 | 0.671 | 0.71 | 1 | HC_vs_MS.Trt_F |
| PIK3C2A    | 0.42394 | 0.39453 | 0.431 | 0.45 | 1 | HC_vs_MS.Trt_F |
| BROX       | 0.42396 | -0.9487 | 0.624 | 0.64 | 1 | HC_vs_MS.Trt_F |
| CD68       | 0.42409 | 0.42024 | 0.604 | 0.55 | 1 | HC_vs_MS.Trt_F |
| CHP1       | 0.42416 | -0.4635 | 0.806 | 0.78 | 1 | HC_vs_MS.Trt_F |
| ZNF557     | 0.42443 | -0.4033 | 0.879 | 0.87 | 1 | HC_vs_MS.Trt_F |
| UQCC3      | 0.42446 | -0.4057 | 0.48  | 0.43 | 1 | HC_vs_MS.Trt_F |
| RND2       | 0.42446 | 0.4931  | 0.425 | 0.39 | 1 | HC_vs_MS.Trt_F |
| ARHGEF4    | 0.42507 | 0.37064 | 0.627 | 0.59 | 1 | HC_vs_MS.Trt_F |
| LA16c-431H | 0.42522 | 0.62813 | 0.555 | 0.53 | 1 | HC_vs_MS.Trt_F |
| TIMM22     | 0.42542 | -0.6624 | 0.107 | 0.12 | 1 | HC_vs_MS.Trt_F |

|             |         |         |       |      |   |                |
|-------------|---------|---------|-------|------|---|----------------|
| A2ML1       | 0.42551 | 0.46115 | 0.685 | 0.63 | 1 | HC_vs_MS.Trt_F |
| FBXW4       | 0.42571 | -0.2697 | 0.506 | 0.45 | 1 | HC_vs_MS.Trt_F |
| ANK3        | 0.42578 | 0.47701 | 0.942 | 0.98 | 1 | HC_vs_MS.Trt_F |
| PLPP2       | 0.42663 | -0.2808 | 0.919 | 0.91 | 1 | HC_vs_MS.Trt_F |
| IRGM        | 0.42695 | 0.43307 | 0.413 | 0.45 | 1 | HC_vs_MS.Trt_F |
| NEK8        | 0.42735 | -0.9169 | 0.621 | 0.57 | 1 | HC_vs_MS.Trt_F |
| UBE2K       | 0.4276  | -0.5577 | 0.162 | 0.18 | 1 | HC_vs_MS.Trt_F |
| EIF2A       | 0.42784 | -0.7369 | 0.621 | 0.61 | 1 | HC_vs_MS.Trt_F |
| VAMP5       | 0.42796 | -0.4901 | 0.182 | 0.15 | 1 | HC_vs_MS.Trt_F |
| HAUS5       | 0.42833 | -0.5777 | 0.523 | 0.53 | 1 | HC_vs_MS.Trt_F |
| RMND5A      | 0.42915 | -0.5903 | 0.384 | 0.33 | 1 | HC_vs_MS.Trt_F |
| ZMYND11     | 0.42956 | -0.3598 | 0.13  | 0.11 | 1 | HC_vs_MS.Trt_F |
| HLA-DQB1    | 0.43031 | 0.99968 | 0.581 | 0.6  | 1 | HC_vs_MS.Trt_F |
| LBHD1       | 0.43071 | -1.0236 | 0.523 | 0.53 | 1 | HC_vs_MS.Trt_F |
| STAG3       | 0.4314  | 0.3385  | 0.234 | 0.21 | 1 | HC_vs_MS.Trt_F |
| ELOVL6      | 0.43156 | -0.2592 | 0.379 | 0.34 | 1 | HC_vs_MS.Trt_F |
| PLEKHG3     | 0.43161 | -0.3412 | 0.5   | 0.46 | 1 | HC_vs_MS.Trt_F |
| LOXL1       | 0.43198 | 0.58509 | 0.104 | 0.09 | 1 | HC_vs_MS.Trt_F |
| RPLP0       | 0.43226 | -0.2518 | 0.925 | 0.85 | 1 | HC_vs_MS.Trt_F |
| TAF6        | 0.43245 | -0.2949 | 0.584 | 0.53 | 1 | HC_vs_MS.Trt_F |
| KLHL18      | 0.43248 | 0.90583 | 0.399 | 0.38 | 1 | HC_vs_MS.Trt_F |
| SIRPB1      | 0.43277 | 0.82227 | 0.275 | 0.25 | 1 | HC_vs_MS.Trt_F |
| RELL1       | 0.43288 | -0.782  | 0.558 | 0.57 | 1 | HC_vs_MS.Trt_F |
| DPEP2       | 0.43314 | -0.6103 | 0.214 | 0.23 | 1 | HC_vs_MS.Trt_F |
| KIDINS220   | 0.43343 | -0.8265 | 0.298 | 0.26 | 1 | HC_vs_MS.Trt_F |
| STAT1       | 0.43349 | -0.3189 | 0.384 | 0.34 | 1 | HC_vs_MS.Trt_F |
| POM121C     | 0.4336  | 0.34524 | 0.497 | 0.46 | 1 | HC_vs_MS.Trt_F |
| GPR137B     | 0.43366 | 0.26323 | 0.124 | 0.1  | 1 | HC_vs_MS.Trt_F |
| RP11-849H4  | 0.43375 | 0.25151 | 0.587 | 0.56 | 1 | HC_vs_MS.Trt_F |
| FAM149A     | 0.43397 | 0.82535 | 0.379 | 0.34 | 1 | HC_vs_MS.Trt_F |
| MCM8        | 0.43455 | -0.5224 | 0.78  | 0.73 | 1 | HC_vs_MS.Trt_F |
| NDUFS1      | 0.43473 | -0.3721 | 0.962 | 0.94 | 1 | HC_vs_MS.Trt_F |
| GTPBP8      | 0.43489 | -0.4496 | 0.702 | 0.64 | 1 | HC_vs_MS.Trt_F |
| MMGT1       | 0.43526 | 0.65014 | 0.118 | 0.1  | 1 | HC_vs_MS.Trt_F |
| C11orf57    | 0.43531 | 0.43796 | 0.769 | 0.75 | 1 | HC_vs_MS.Trt_F |
| CTC-454I21. | 0.43562 | -0.433  | 0.234 | 0.21 | 1 | HC_vs_MS.Trt_F |
| LONP2       | 0.43642 | -0.3473 | 0.798 | 0.73 | 1 | HC_vs_MS.Trt_F |
| CHMP6       | 0.43699 | 0.28251 | 0.145 | 0.12 | 1 | HC_vs_MS.Trt_F |
| TTC32       | 0.43727 | -0.7484 | 0.098 | 0.12 | 1 | HC_vs_MS.Trt_F |
| ACOT4       | 0.43727 | 0.39916 | 0.15  | 0.13 | 1 | HC_vs_MS.Trt_F |

|          |         |         |       |      |   |                |
|----------|---------|---------|-------|------|---|----------------|
| FBXL8    | 0.43791 | 0.4403  | 0.618 | 0.55 | 1 | HC_vs_MS.Trt_F |
| RBM20    | 0.43796 | 0.31717 | 0.483 | 0.48 | 1 | HC_vs_MS.Trt_F |
| IL23R    | 0.4384  | 0.32905 | 0.422 | 0.39 | 1 | HC_vs_MS.Trt_F |
| PRAM1    | 0.43853 | 0.27935 | 0.564 | 0.53 | 1 | HC_vs_MS.Trt_F |
| CRTAM    | 0.43971 | -0.7786 | 0.442 | 0.38 | 1 | HC_vs_MS.Trt_F |
| TMEM56   | 0.44031 | -0.3417 | 0.428 | 0.48 | 1 | HC_vs_MS.Trt_F |
| LAS1L    | 0.44035 | -0.3457 | 0.165 | 0.14 | 1 | HC_vs_MS.Trt_F |
| TNFSF9   | 0.44061 | 0.39417 | 0.11  | 0.09 | 1 | HC_vs_MS.Trt_F |
| LRIF1    | 0.44065 | 0.96085 | 0.121 | 0.1  | 1 | HC_vs_MS.Trt_F |
| PUS10    | 0.44085 | 0.43825 | 0.734 | 0.72 | 1 | HC_vs_MS.Trt_F |
| FAM134A  | 0.44169 | -0.539  | 0.428 | 0.42 | 1 | HC_vs_MS.Trt_F |
| FAIM     | 0.44201 | 0.41168 | 0.399 | 0.36 | 1 | HC_vs_MS.Trt_F |
| ZNF92    | 0.44212 | -0.5315 | 0.11  | 0.13 | 1 | HC_vs_MS.Trt_F |
| SCAMP2   | 0.44279 | -0.4501 | 0.329 | 0.34 | 1 | HC_vs_MS.Trt_F |
| ZNF624   | 0.44307 | 0.49355 | 0.434 | 0.38 | 1 | HC_vs_MS.Trt_F |
| SLC39A10 | 0.4432  | 0.41183 | 0.202 | 0.18 | 1 | HC_vs_MS.Trt_F |
| RBMXL1   | 0.44328 | 1.08546 | 0.153 | 0.13 | 1 | HC_vs_MS.Trt_F |
| PURB     | 0.44392 | 0.60469 | 0.52  | 0.48 | 1 | HC_vs_MS.Trt_F |
| SLC2A1   | 0.44419 | -0.427  | 0.159 | 0.13 | 1 | HC_vs_MS.Trt_F |
| C15orf53 | 0.44429 | 0.56473 | 0.136 | 0.12 | 1 | HC_vs_MS.Trt_F |
| ZNF516   | 0.4444  | -0.5426 | 0.107 | 0.09 | 1 | HC_vs_MS.Trt_F |
| BIN2     | 0.44455 | -0.4481 | 0.543 | 0.53 | 1 | HC_vs_MS.Trt_F |
| STAT2    | 0.44481 | -0.338  | 0.931 | 0.89 | 1 | HC_vs_MS.Trt_F |
| KCNJ14   | 0.44496 | 0.41511 | 0.653 | 0.6  | 1 | HC_vs_MS.Trt_F |
| RFX1     | 0.44501 | 0.69408 | 0.379 | 0.35 | 1 | HC_vs_MS.Trt_F |
| ARHGEF5  | 0.44573 | 0.4642  | 0.121 | 0.1  | 1 | HC_vs_MS.Trt_F |
| GTF2F1   | 0.44576 | -0.3236 | 0.364 | 0.31 | 1 | HC_vs_MS.Trt_F |
| MOSPD3   | 0.44603 | 0.26642 | 0.124 | 0.1  | 1 | HC_vs_MS.Trt_F |
| FAM210B  | 0.44632 | 0.35913 | 0.312 | 0.34 | 1 | HC_vs_MS.Trt_F |
| TRIM59   | 0.44701 | -0.63   | 0.853 | 0.82 | 1 | HC_vs_MS.Trt_F |
| UBE2N    | 0.44706 | -0.3621 | 0.604 | 0.54 | 1 | HC_vs_MS.Trt_F |
| C12orf4  | 0.44722 | 0.25905 | 0.491 | 0.47 | 1 | HC_vs_MS.Trt_F |
| FBXO32   | 0.44745 | -0.5513 | 0.147 | 0.17 | 1 | HC_vs_MS.Trt_F |
| SPOUT1   | 0.44745 | -0.6563 | 0.188 | 0.16 | 1 | HC_vs_MS.Trt_F |
| CNOT8    | 0.44818 | -0.3817 | 0.249 | 0.22 | 1 | HC_vs_MS.Trt_F |
| GRAPL    | 0.44879 | 0.9747  | 0.104 | 0.09 | 1 | HC_vs_MS.Trt_F |
| MRPS21   | 0.44961 | -0.3888 | 0.613 | 0.57 | 1 | HC_vs_MS.Trt_F |
| PAIP1    | 0.45021 | -0.6421 | 0.147 | 0.16 | 1 | HC_vs_MS.Trt_F |
| IST1     | 0.45033 | -0.4281 | 0.647 | 0.64 | 1 | HC_vs_MS.Trt_F |
| C21orf33 | 0.45035 | -0.2533 | 0.416 | 0.37 | 1 | HC_vs_MS.Trt_F |

|           |         |         |       |      |   |                |
|-----------|---------|---------|-------|------|---|----------------|
| CDV3      | 0.45084 | -0.951  | 0.251 | 0.26 | 1 | HC_vs_MS.Trt_F |
| OASL      | 0.45117 | -0.6418 | 0.24  | 0.27 | 1 | HC_vs_MS.Trt_F |
| MRPL2     | 0.45154 | -0.5176 | 0.338 | 0.29 | 1 | HC_vs_MS.Trt_F |
| CSDE1     | 0.45193 | -0.3498 | 0.434 | 0.44 | 1 | HC_vs_MS.Trt_F |
| MAATS1    | 0.45261 | 0.28718 | 0.277 | 0.25 | 1 | HC_vs_MS.Trt_F |
| CYP2F1    | 0.45276 | 0.70438 | 0.185 | 0.17 | 1 | HC_vs_MS.Trt_F |
| SYT16     | 0.4528  | 0.50069 | 0.312 | 0.28 | 1 | HC_vs_MS.Trt_F |
| MEMO1     | 0.45311 | -0.4618 | 0.393 | 0.36 | 1 | HC_vs_MS.Trt_F |
| ROBO4     | 0.45324 | 1.1466  | 0.191 | 0.17 | 1 | HC_vs_MS.Trt_F |
| DNAJC8    | 0.45327 | -0.335  | 0.306 | 0.27 | 1 | HC_vs_MS.Trt_F |
| EXT2      | 0.45343 | -0.3626 | 0.191 | 0.17 | 1 | HC_vs_MS.Trt_F |
| RAD50     | 0.45401 | 0.306   | 0.225 | 0.2  | 1 | HC_vs_MS.Trt_F |
| GLCC1     | 0.45417 | 0.69941 | 0.286 | 0.27 | 1 | HC_vs_MS.Trt_F |
| RANBP9    | 0.45438 | 0.30795 | 0.266 | 0.24 | 1 | HC_vs_MS.Trt_F |
| ZNF420    | 0.45438 | -0.8424 | 0.127 | 0.1  | 1 | HC_vs_MS.Trt_F |
| AKAP17A   | 0.4544  | 0.51133 | 0.118 | 0.1  | 1 | HC_vs_MS.Trt_F |
| DAXX      | 0.45448 | -0.4798 | 0.173 | 0.19 | 1 | HC_vs_MS.Trt_F |
| LRP12     | 0.45456 | -0.3033 | 0.682 | 0.6  | 1 | HC_vs_MS.Trt_F |
| PACSIN2   | 0.4546  | -0.5206 | 0.494 | 0.52 | 1 | HC_vs_MS.Trt_F |
| PRCC      | 0.45521 | 0.52724 | 0.176 | 0.15 | 1 | HC_vs_MS.Trt_F |
| APOBEC3F  | 0.45586 | -0.3547 | 0.928 | 0.92 | 1 | HC_vs_MS.Trt_F |
| CFL2      | 0.45591 | -0.4149 | 0.694 | 0.63 | 1 | HC_vs_MS.Trt_F |
| NCF1      | 0.45597 | 1.85892 | 0.543 | 0.5  | 1 | HC_vs_MS.Trt_F |
| HLX       | 0.4561  | 0.28923 | 0.197 | 0.17 | 1 | HC_vs_MS.Trt_F |
| GFOD1     | 0.45629 | -1.0332 | 0.699 | 0.63 | 1 | HC_vs_MS.Trt_F |
| KDM5A     | 0.45643 | -0.2529 | 0.673 | 0.65 | 1 | HC_vs_MS.Trt_F |
| MPHOSPH10 | 0.45757 | 0.31794 | 0.246 | 0.22 | 1 | HC_vs_MS.Trt_F |
| RASA3     | 0.45785 | -0.3576 | 0.442 | 0.46 | 1 | HC_vs_MS.Trt_F |
| PYHIN1    | 0.45852 | 0.27577 | 0.627 | 0.61 | 1 | HC_vs_MS.Trt_F |
| TIAL1     | 0.45863 | -0.2561 | 0.87  | 0.83 | 1 | HC_vs_MS.Trt_F |
| KPNA6     | 0.459   | -0.3616 | 0.592 | 0.59 | 1 | HC_vs_MS.Trt_F |
| CCDC93    | 0.45907 | -0.3525 | 0.179 | 0.15 | 1 | HC_vs_MS.Trt_F |
| DISC1     | 0.45915 | 0.25655 | 0.558 | 0.52 | 1 | HC_vs_MS.Trt_F |
| TECPR1    | 0.45915 | -0.4952 | 0.509 | 0.44 | 1 | HC_vs_MS.Trt_F |
| HNRNPM    | 0.45941 | -0.298  | 0.266 | 0.23 | 1 | HC_vs_MS.Trt_F |
| ZNF561    | 0.45965 | -0.7429 | 0.601 | 0.51 | 1 | HC_vs_MS.Trt_F |
| EIF5B     | 0.45965 | -0.2969 | 0.332 | 0.29 | 1 | HC_vs_MS.Trt_F |
| USP42     | 0.4597  | 0.43546 | 0.468 | 0.44 | 1 | HC_vs_MS.Trt_F |
| C8orf37   | 0.4613  | 0.45119 | 0.552 | 0.53 | 1 | HC_vs_MS.Trt_F |
| ZFP90     | 0.46173 | 0.61182 | 0.445 | 0.47 | 1 | HC_vs_MS.Trt_F |



|            |         |         |       |      |   |                |
|------------|---------|---------|-------|------|---|----------------|
| DDHD2      | 0.46179 | 0.26645 | 0.864 | 0.82 | 1 | HC_vs_MS.Trt_F |
| PSMB1      | 0.46208 | -0.3028 | 0.358 | 0.31 | 1 | HC_vs_MS.Trt_F |
| NDUFB1     | 0.46219 | -0.304  | 0.78  | 0.72 | 1 | HC_vs_MS.Trt_F |
| CCDC153    | 0.46261 | -0.7481 | 0.269 | 0.25 | 1 | HC_vs_MS.Trt_F |
| CLPX       | 0.46296 | -0.7427 | 0.731 | 0.67 | 1 | HC_vs_MS.Trt_F |
| RP11-505K9 | 0.463   | -0.3589 | 0.09  | 0.11 | 1 | HC_vs_MS.Trt_F |
| ISG20L2    | 0.46337 | 0.58908 | 0.85  | 0.82 | 1 | HC_vs_MS.Trt_F |
| TMEM222    | 0.46347 | 0.53754 | 0.153 | 0.13 | 1 | HC_vs_MS.Trt_F |
| ZNF484     | 0.46354 | 0.94593 | 0.107 | 0.09 | 1 | HC_vs_MS.Trt_F |
| RNF14      | 0.46412 | 0.64008 | 0.65  | 0.58 | 1 | HC_vs_MS.Trt_F |
| TMEM126B   | 0.46448 | -0.49   | 0.234 | 0.21 | 1 | HC_vs_MS.Trt_F |
| ZNF518B    | 0.4649  | -0.5743 | 0.116 | 0.09 | 1 | HC_vs_MS.Trt_F |
| ZDHHC14    | 0.46542 | 0.29851 | 0.338 | 0.36 | 1 | HC_vs_MS.Trt_F |
| RP11-1035H | 0.46561 | -0.8025 | 0.153 | 0.13 | 1 | HC_vs_MS.Trt_F |
| CSTF3      | 0.46584 | -1.3169 | 0.558 | 0.51 | 1 | HC_vs_MS.Trt_F |
| VPS51      | 0.46593 | 0.25438 | 0.283 | 0.26 | 1 | HC_vs_MS.Trt_F |
| GGPS1      | 0.46597 | -0.3216 | 0.454 | 0.47 | 1 | HC_vs_MS.Trt_F |
| PGM2       | 0.46622 | -0.7269 | 0.13  | 0.11 | 1 | HC_vs_MS.Trt_F |
| BTBD10     | 0.46656 | 0.30462 | 0.159 | 0.14 | 1 | HC_vs_MS.Trt_F |
| ZCRB1      | 0.4668  | -0.8468 | 0.165 | 0.18 | 1 | HC_vs_MS.Trt_F |
| SLC44A1    | 0.46697 | 0.86013 | 0.639 | 0.66 | 1 | HC_vs_MS.Trt_F |
| NNMT       | 0.46706 | -0.416  | 0.139 | 0.12 | 1 | HC_vs_MS.Trt_F |
| CD24       | 0.46753 | -0.2593 | 0.373 | 0.41 | 1 | HC_vs_MS.Trt_F |
| ATG9A      | 0.46791 | 0.70006 | 0.116 | 0.1  | 1 | HC_vs_MS.Trt_F |
| SNRPB2     | 0.46802 | -0.5964 | 0.208 | 0.22 | 1 | HC_vs_MS.Trt_F |
| NAAA       | 0.46835 | -0.315  | 0.728 | 0.77 | 1 | HC_vs_MS.Trt_F |
| EGR1       | 0.46848 | -0.3476 | 0.121 | 0.14 | 1 | HC_vs_MS.Trt_F |
| HIVEP3     | 0.46852 | -0.293  | 0.092 | 0.11 | 1 | HC_vs_MS.Trt_F |
| DNAJB12    | 0.46877 | -0.5335 | 0.15  | 0.13 | 1 | HC_vs_MS.Trt_F |
| ZSCAN12    | 0.46877 | 0.53537 | 0.468 | 0.49 | 1 | HC_vs_MS.Trt_F |
| PTPRM      | 0.4689  | 1.09781 | 0.225 | 0.2  | 1 | HC_vs_MS.Trt_F |
| TEX2       | 0.46924 | 0.56014 | 0.72  | 0.63 | 1 | HC_vs_MS.Trt_F |
| SAR1B      | 0.46931 | -0.2565 | 0.977 | 0.97 | 1 | HC_vs_MS.Trt_F |
| LBR        | 0.46952 | -0.6545 | 0.249 | 0.22 | 1 | HC_vs_MS.Trt_F |
| IRF7       | 0.46988 | -0.4393 | 0.145 | 0.16 | 1 | HC_vs_MS.Trt_F |
| CLCN6      | 0.47035 | 0.32256 | 0.59  | 0.53 | 1 | HC_vs_MS.Trt_F |
| CFD        | 0.4711  | 0.74099 | 0.197 | 0.22 | 1 | HC_vs_MS.Trt_F |
| GDAP1      | 0.47173 | -0.3252 | 0.092 | 0.11 | 1 | HC_vs_MS.Trt_F |
| ANKDD1A    | 0.47215 | 0.32398 | 0.581 | 0.56 | 1 | HC_vs_MS.Trt_F |
| MAP2K7     | 0.47267 | 0.39381 | 0.65  | 0.59 | 1 | HC_vs_MS.Trt_F |

|          |         |         |       |      |   |                |
|----------|---------|---------|-------|------|---|----------------|
| FILIP1L  | 0.47273 | 0.54841 | 0.442 | 0.39 | 1 | HC_vs_MS.Trt_F |
| ZZZ3     | 0.47295 | 0.27312 | 0.824 | 0.81 | 1 | HC_vs_MS.Trt_F |
| EHBP1    | 0.47303 | -0.3688 | 0.405 | 0.44 | 1 | HC_vs_MS.Trt_F |
| NAA20    | 0.47318 | -0.4525 | 0.156 | 0.13 | 1 | HC_vs_MS.Trt_F |
| DPM2     | 0.47326 | -0.6693 | 0.13  | 0.11 | 1 | HC_vs_MS.Trt_F |
| SLC25A17 | 0.47334 | -0.4718 | 0.312 | 0.32 | 1 | HC_vs_MS.Trt_F |
| DCAF4    | 0.47391 | -0.3622 | 0.587 | 0.54 | 1 | HC_vs_MS.Trt_F |
| SCLT1    | 0.47405 | 0.63699 | 0.673 | 0.62 | 1 | HC_vs_MS.Trt_F |
| COG3     | 0.47408 | -0.7273 | 0.168 | 0.18 | 1 | HC_vs_MS.Trt_F |
| CCHCR1   | 0.47415 | 1.66285 | 0.376 | 0.35 | 1 | HC_vs_MS.Trt_F |
| FRG2C    | 0.47416 | 1.19696 | 0.194 | 0.17 | 1 | HC_vs_MS.Trt_F |
| PIP4K2B  | 0.47437 | -0.443  | 0.153 | 0.13 | 1 | HC_vs_MS.Trt_F |
| ORC3     | 0.47507 | -0.3359 | 0.191 | 0.17 | 1 | HC_vs_MS.Trt_F |
| ZNF727   | 0.47514 | 1.25316 | 0.384 | 0.36 | 1 | HC_vs_MS.Trt_F |
| RNF113A  | 0.47534 | -0.4695 | 0.139 | 0.12 | 1 | HC_vs_MS.Trt_F |
| COG6     | 0.47569 | -1.1474 | 0.159 | 0.18 | 1 | HC_vs_MS.Trt_F |
| C8orf59  | 0.47609 | -0.3185 | 0.442 | 0.45 | 1 | HC_vs_MS.Trt_F |
| POLD3    | 0.47612 | -1.4175 | 0.176 | 0.19 | 1 | HC_vs_MS.Trt_F |
| AAED1    | 0.47629 | -0.7417 | 0.829 | 0.78 | 1 | HC_vs_MS.Trt_F |
| H2AFJ    | 0.47638 | 0.3977  | 0.15  | 0.13 | 1 | HC_vs_MS.Trt_F |
| LOXL2    | 0.47673 | 0.33318 | 0.74  | 0.73 | 1 | HC_vs_MS.Trt_F |
| FAM127B  | 0.47679 | 0.34855 | 0.13  | 0.11 | 1 | HC_vs_MS.Trt_F |
| TARS     | 0.47685 | -0.5781 | 0.257 | 0.22 | 1 | HC_vs_MS.Trt_F |
| INTS2    | 0.47738 | 0.28434 | 0.298 | 0.27 | 1 | HC_vs_MS.Trt_F |
| CAV2     | 0.4774  | 0.31259 | 0.61  | 0.59 | 1 | HC_vs_MS.Trt_F |
| PPP2CB   | 0.47756 | 0.27577 | 0.564 | 0.59 | 1 | HC_vs_MS.Trt_F |
| RBMS3    | 0.47786 | 0.36894 | 0.697 | 0.67 | 1 | HC_vs_MS.Trt_F |
| HIGD2A   | 0.47796 | -0.3535 | 0.335 | 0.29 | 1 | HC_vs_MS.Trt_F |
| CLEC2B   | 0.47815 | -0.3992 | 0.251 | 0.22 | 1 | HC_vs_MS.Trt_F |
| LRP2     | 0.47861 | 0.38005 | 0.098 | 0.12 | 1 | HC_vs_MS.Trt_F |
| PCF11    | 0.47862 | -0.2754 | 0.512 | 0.46 | 1 | HC_vs_MS.Trt_F |
| LAMTOR3  | 0.47867 | -0.5691 | 0.353 | 0.36 | 1 | HC_vs_MS.Trt_F |
| PSMA4    | 0.47888 | -0.5413 | 0.402 | 0.36 | 1 | HC_vs_MS.Trt_F |
| ITGB4    | 0.47906 | -0.9719 | 0.237 | 0.25 | 1 | HC_vs_MS.Trt_F |
| FAM101B  | 0.47943 | -0.3919 | 0.324 | 0.29 | 1 | HC_vs_MS.Trt_F |
| CEACAM1  | 0.47952 | 0.78468 | 0.882 | 0.92 | 1 | HC_vs_MS.Trt_F |
| GNG5     | 0.47982 | -0.3424 | 0.286 | 0.25 | 1 | HC_vs_MS.Trt_F |
| KYAT3    | 0.47983 | -0.3729 | 0.136 | 0.12 | 1 | HC_vs_MS.Trt_F |
| TREX1    | 0.48027 | 0.95092 | 0.121 | 0.1  | 1 | HC_vs_MS.Trt_F |
| EGLN2    | 0.48111 | -0.7079 | 0.251 | 0.26 | 1 | HC_vs_MS.Trt_F |

|             |         |         |       |      |   |                |
|-------------|---------|---------|-------|------|---|----------------|
| IFNAR1      | 0.48117 | -0.5176 | 0.561 | 0.5  | 1 | HC_vs_MS.Trt_F |
| PSMB8       | 0.48124 | -0.4969 | 0.382 | 0.39 | 1 | HC_vs_MS.Trt_F |
| KNTC1       | 0.48134 | -1.0291 | 0.838 | 0.81 | 1 | HC_vs_MS.Trt_F |
| TMX3        | 0.48145 | -0.388  | 0.462 | 0.43 | 1 | HC_vs_MS.Trt_F |
| SH2D1B      | 0.48195 | 0.8628  | 0.263 | 0.23 | 1 | HC_vs_MS.Trt_F |
| PLEKHG5     | 0.48208 | -0.9761 | 0.182 | 0.16 | 1 | HC_vs_MS.Trt_F |
| ZNF254      | 0.48276 | -0.6804 | 0.416 | 0.45 | 1 | HC_vs_MS.Trt_F |
| PITPNM1     | 0.48317 | -0.6028 | 0.306 | 0.27 | 1 | HC_vs_MS.Trt_F |
| ZNF12       | 0.48387 | 0.94965 | 0.361 | 0.32 | 1 | HC_vs_MS.Trt_F |
| VCPKMT      | 0.48414 | 0.59726 | 0.118 | 0.1  | 1 | HC_vs_MS.Trt_F |
| GPR161      | 0.48447 | -0.6279 | 0.436 | 0.41 | 1 | HC_vs_MS.Trt_F |
| NR2C2AP     | 0.48454 | -0.7745 | 0.107 | 0.12 | 1 | HC_vs_MS.Trt_F |
| CH507-9B2.1 | 0.48455 | -0.5462 | 0.517 | 0.46 | 1 | HC_vs_MS.Trt_F |
| SLC35B2     | 0.48462 | 0.64667 | 0.116 | 0.1  | 1 | HC_vs_MS.Trt_F |
| MORC2       | 0.48497 | -0.3822 | 0.434 | 0.37 | 1 | HC_vs_MS.Trt_F |
| JMJD7-PLA2  | 0.48548 | -0.7166 | 0.329 | 0.35 | 1 | HC_vs_MS.Trt_F |
| PLEKH02     | 0.48566 | -0.4675 | 0.104 | 0.12 | 1 | HC_vs_MS.Trt_F |
| HYAL1       | 0.48636 | -0.4548 | 0.376 | 0.4  | 1 | HC_vs_MS.Trt_F |
| ZNF718      | 0.4872  | -0.4017 | 0.295 | 0.31 | 1 | HC_vs_MS.Trt_F |
| AIG1        | 0.48726 | -0.3634 | 0.642 | 0.58 | 1 | HC_vs_MS.Trt_F |
| TTC7A       | 0.48736 | 0.28668 | 0.249 | 0.22 | 1 | HC_vs_MS.Trt_F |
| EGLN1       | 0.48765 | -1.1868 | 0.364 | 0.37 | 1 | HC_vs_MS.Trt_F |
| SEPSECS     | 0.48771 | 0.3737  | 0.789 | 0.76 | 1 | HC_vs_MS.Trt_F |
| RCN1        | 0.48854 | -0.4236 | 0.116 | 0.1  | 1 | HC_vs_MS.Trt_F |
| ETNK1       | 0.48868 | -0.2763 | 0.503 | 0.51 | 1 | HC_vs_MS.Trt_F |
| EIF4EBP2    | 0.48896 | -0.3653 | 0.656 | 0.69 | 1 | HC_vs_MS.Trt_F |
| DUSP22      | 0.48933 | -0.4099 | 0.116 | 0.1  | 1 | HC_vs_MS.Trt_F |
| COMMD6      | 0.48936 | -0.3133 | 0.416 | 0.36 | 1 | HC_vs_MS.Trt_F |
| VPS50       | 0.48957 | 0.59287 | 0.665 | 0.6  | 1 | HC_vs_MS.Trt_F |
| C1orf159    | 0.49048 | 0.25454 | 0.208 | 0.18 | 1 | HC_vs_MS.Trt_F |
| ABRACL      | 0.49049 | -0.3685 | 0.257 | 0.22 | 1 | HC_vs_MS.Trt_F |
| ZNF772      | 0.49089 | -0.6539 | 0.471 | 0.51 | 1 | HC_vs_MS.Trt_F |
| TRMU        | 0.49091 | -0.409  | 0.199 | 0.22 | 1 | HC_vs_MS.Trt_F |
| IPPK        | 0.49117 | -1.2443 | 0.101 | 0.08 | 1 | HC_vs_MS.Trt_F |
| RPA2        | 0.49222 | -0.5417 | 0.217 | 0.23 | 1 | HC_vs_MS.Trt_F |
| MOCS2       | 0.49405 | -0.3603 | 0.116 | 0.1  | 1 | HC_vs_MS.Trt_F |
| FANCA       | 0.49424 | -0.2836 | 0.315 | 0.28 | 1 | HC_vs_MS.Trt_F |
| RNF7        | 0.49429 | 0.37565 | 0.682 | 0.64 | 1 | HC_vs_MS.Trt_F |
| COX18       | 0.49432 | -0.2612 | 0.887 | 0.85 | 1 | HC_vs_MS.Trt_F |
| CENPN       | 0.49451 | 0.53859 | 0.217 | 0.2  | 1 | HC_vs_MS.Trt_F |

|            |         |         |       |      |   |                |
|------------|---------|---------|-------|------|---|----------------|
| UBA5       | 0.49455 | -1.9633 | 0.136 | 0.15 | 1 | HC_vs_MS.Trt_F |
| EMC8       | 0.49523 | -0.8269 | 0.208 | 0.22 | 1 | HC_vs_MS.Trt_F |
| ZNF841     | 0.49546 | 0.80688 | 0.538 | 0.51 | 1 | HC_vs_MS.Trt_F |
| ARHGEF2    | 0.49561 | 0.41207 | 0.275 | 0.24 | 1 | HC_vs_MS.Trt_F |
| NDUFAF3    | 0.49562 | -0.43   | 0.185 | 0.16 | 1 | HC_vs_MS.Trt_F |
| HERC6      | 0.49583 | -0.4748 | 0.277 | 0.3  | 1 | HC_vs_MS.Trt_F |
| FCHO2      | 0.49602 | -0.3879 | 0.353 | 0.37 | 1 | HC_vs_MS.Trt_F |
| UBFD1      | 0.4965  | 1.31522 | 0.425 | 0.36 | 1 | HC_vs_MS.Trt_F |
| INSIG2     | 0.49719 | -1.0627 | 0.133 | 0.14 | 1 | HC_vs_MS.Trt_F |
| STX3       | 0.4972  | 0.73937 | 0.483 | 0.45 | 1 | HC_vs_MS.Trt_F |
| CARF       | 0.49732 | -0.4737 | 0.546 | 0.51 | 1 | HC_vs_MS.Trt_F |
| AP003419.1 | 0.49765 | -0.4064 | 0.208 | 0.22 | 1 | HC_vs_MS.Trt_F |
| CDR2       | 0.49775 | 1.03487 | 0.168 | 0.15 | 1 | HC_vs_MS.Trt_F |
| CNEP1R1    | 0.49776 | -1.5601 | 0.555 | 0.58 | 1 | HC_vs_MS.Trt_F |
| PI16       | 0.49778 | -0.4314 | 0.142 | 0.16 | 1 | HC_vs_MS.Trt_F |
| APLF       | 0.49782 | -0.8771 | 0.199 | 0.18 | 1 | HC_vs_MS.Trt_F |
| C14orf119  | 0.49817 | -0.8729 | 0.595 | 0.53 | 1 | HC_vs_MS.Trt_F |
| CDC37L1    | 0.49835 | 0.76893 | 0.118 | 0.1  | 1 | HC_vs_MS.Trt_F |
| AXL        | 0.49842 | 0.47251 | 0.772 | 0.72 | 1 | HC_vs_MS.Trt_F |
| RNF121     | 0.49845 | 0.25336 | 0.361 | 0.32 | 1 | HC_vs_MS.Trt_F |
| ATP8A1     | 0.49864 | -0.2869 | 0.15  | 0.17 | 1 | HC_vs_MS.Trt_F |
| MDM1       | 0.49877 | 0.55308 | 0.11  | 0.09 | 1 | HC_vs_MS.Trt_F |
| VPS39      | 0.4993  | -0.8704 | 0.538 | 0.49 | 1 | HC_vs_MS.Trt_F |
| ARL8B      | 0.5     | -0.4329 | 0.474 | 0.41 | 1 | HC_vs_MS.Trt_F |
| SURF1      | 0.50001 | -0.886  | 0.113 | 0.13 | 1 | HC_vs_MS.Trt_F |
| NUDT7      | 0.50038 | -0.3444 | 0.24  | 0.21 | 1 | HC_vs_MS.Trt_F |
| SLC35F2    | 0.50043 | 0.315   | 0.312 | 0.29 | 1 | HC_vs_MS.Trt_F |
| PCCA       | 0.5006  | -0.4228 | 0.647 | 0.61 | 1 | HC_vs_MS.Trt_F |
| RXRA       | 0.50063 | 0.58373 | 0.225 | 0.21 | 1 | HC_vs_MS.Trt_F |
| SEZ6       | 0.50123 | -0.3496 | 0.13  | 0.11 | 1 | HC_vs_MS.Trt_F |
| ZDHHC18    | 0.50147 | 0.34535 | 0.118 | 0.1  | 1 | HC_vs_MS.Trt_F |
| SUMF1      | 0.5019  | 0.76187 | 0.76  | 0.75 | 1 | HC_vs_MS.Trt_F |
| ATP5L2     | 0.50247 | 0.41836 | 0.353 | 0.32 | 1 | HC_vs_MS.Trt_F |
| GEMIN2     | 0.50256 | -0.4186 | 0.691 | 0.68 | 1 | HC_vs_MS.Trt_F |
| SLC22A5    | 0.5026  | 0.57094 | 0.428 | 0.39 | 1 | HC_vs_MS.Trt_F |
| IL12RB1    | 0.50297 | 0.25428 | 0.89  | 0.87 | 1 | HC_vs_MS.Trt_F |
| AGFG1      | 0.50309 | -0.6896 | 0.095 | 0.11 | 1 | HC_vs_MS.Trt_F |
| FURIN      | 0.50332 | -0.4105 | 0.11  | 0.09 | 1 | HC_vs_MS.Trt_F |
| MBD2       | 0.50334 | -0.3468 | 0.095 | 0.11 | 1 | HC_vs_MS.Trt_F |
| RCC2       | 0.50351 | 0.26874 | 0.13  | 0.11 | 1 | HC_vs_MS.Trt_F |

|           |         |         |       |      |   |                |
|-----------|---------|---------|-------|------|---|----------------|
| NME6      | 0.50363 | 0.2764  | 0.931 | 0.87 | 1 | HC_vs_MS.Trt_F |
| SNAP23    | 0.50382 | -0.2626 | 0.682 | 0.66 | 1 | HC_vs_MS.Trt_F |
| TNFAIP8L1 | 0.5044  | -0.3366 | 0.882 | 0.85 | 1 | HC_vs_MS.Trt_F |
| PDGFA     | 0.50442 | 0.26692 | 0.578 | 0.57 | 1 | HC_vs_MS.Trt_F |
| MRPL51    | 0.50464 | -0.359  | 0.156 | 0.17 | 1 | HC_vs_MS.Trt_F |
| IL18BP    | 0.50504 | -0.3669 | 0.147 | 0.13 | 1 | HC_vs_MS.Trt_F |
| SYNE4     | 0.50515 | -0.4588 | 0.517 | 0.5  | 1 | HC_vs_MS.Trt_F |
| SVEP1     | 0.50557 | 2.15598 | 0.243 | 0.22 | 1 | HC_vs_MS.Trt_F |
| RNF146    | 0.50561 | -0.8142 | 0.113 | 0.13 | 1 | HC_vs_MS.Trt_F |
| LAMC3     | 0.50589 | -1.4061 | 0.283 | 0.3  | 1 | HC_vs_MS.Trt_F |
| PPP1R2    | 0.50595 | -0.7108 | 0.656 | 0.64 | 1 | HC_vs_MS.Trt_F |
| FAM173B   | 0.50611 | 0.30573 | 0.197 | 0.18 | 1 | HC_vs_MS.Trt_F |
| WDR75     | 0.50631 | 0.5959  | 0.358 | 0.35 | 1 | HC_vs_MS.Trt_F |
| ZNF3      | 0.50637 | -0.7475 | 0.78  | 0.75 | 1 | HC_vs_MS.Trt_F |
| IMP4      | 0.50711 | -0.3902 | 0.263 | 0.28 | 1 | HC_vs_MS.Trt_F |
| ARAP2     | 0.50711 | -0.5192 | 0.335 | 0.29 | 1 | HC_vs_MS.Trt_F |
| PER3      | 0.50714 | 1.68394 | 0.101 | 0.09 | 1 | HC_vs_MS.Trt_F |
| MTIF2     | 0.50744 | 0.36685 | 0.408 | 0.42 | 1 | HC_vs_MS.Trt_F |
| PRICKLE3  | 0.50781 | 0.77055 | 0.555 | 0.5  | 1 | HC_vs_MS.Trt_F |
| ACP5      | 0.50808 | -0.4575 | 0.165 | 0.14 | 1 | HC_vs_MS.Trt_F |
| RARS      | 0.5083  | -0.2782 | 0.532 | 0.49 | 1 | HC_vs_MS.Trt_F |
| XYLB      | 0.50841 | 0.31378 | 0.488 | 0.47 | 1 | HC_vs_MS.Trt_F |
| TMIGD2    | 0.50894 | -0.6337 | 0.231 | 0.25 | 1 | HC_vs_MS.Trt_F |
| SLC25A23  | 0.50962 | -0.2607 | 0.462 | 0.49 | 1 | HC_vs_MS.Trt_F |
| BTF3      | 0.50981 | -0.254  | 0.555 | 0.55 | 1 | HC_vs_MS.Trt_F |
| TRRAP     | 0.51013 | -0.3999 | 0.165 | 0.14 | 1 | HC_vs_MS.Trt_F |
| SMG6      | 0.51024 | 0.95722 | 0.251 | 0.24 | 1 | HC_vs_MS.Trt_F |
| ARMC1     | 0.51034 | -0.4962 | 0.127 | 0.14 | 1 | HC_vs_MS.Trt_F |
| RNPEP     | 0.51118 | 0.2726  | 0.104 | 0.12 | 1 | HC_vs_MS.Trt_F |
| SLFN5     | 0.51129 | -0.3373 | 0.855 | 0.86 | 1 | HC_vs_MS.Trt_F |
| CLCN2     | 0.51137 | -0.2596 | 0.699 | 0.63 | 1 | HC_vs_MS.Trt_F |
| FOCAD     | 0.5114  | -0.3377 | 0.561 | 0.52 | 1 | HC_vs_MS.Trt_F |
| C5orf15   | 0.5116  | -1.1298 | 0.156 | 0.17 | 1 | HC_vs_MS.Trt_F |
| TJP3      | 0.51213 | -0.5177 | 0.095 | 0.11 | 1 | HC_vs_MS.Trt_F |
| HABP4     | 0.51249 | -0.9964 | 0.182 | 0.17 | 1 | HC_vs_MS.Trt_F |
| FAR1      | 0.51268 | 0.98191 | 0.104 | 0.09 | 1 | HC_vs_MS.Trt_F |
| EIF5      | 0.51287 | -0.3534 | 0.598 | 0.58 | 1 | HC_vs_MS.Trt_F |
| B3GAT3    | 0.51314 | -0.4337 | 0.566 | 0.54 | 1 | HC_vs_MS.Trt_F |
| TMEM8B    | 0.51321 | 0.34824 | 0.751 | 0.73 | 1 | HC_vs_MS.Trt_F |
| SPTSSA    | 0.51326 | 0.34598 | 0.41  | 0.36 | 1 | HC_vs_MS.Trt_F |

|           |         |         |       |      |   |                |
|-----------|---------|---------|-------|------|---|----------------|
| USP9Y     | 0.51358 | 0.90999 | 0.292 | 0.27 | 1 | HC_vs_MS.Trt_F |
| ALS2CL    | 0.51375 | -0.3331 | 0.176 | 0.15 | 1 | HC_vs_MS.Trt_F |
| GPN1      | 0.51379 | -0.5309 | 0.147 | 0.17 | 1 | HC_vs_MS.Trt_F |
| RASAL2    | 0.5141  | 0.39646 | 0.555 | 0.51 | 1 | HC_vs_MS.Trt_F |
| NDUFC2    | 0.51447 | -0.571  | 0.613 | 0.57 | 1 | HC_vs_MS.Trt_F |
| ZC4H2     | 0.51501 | 1.73702 | 0.107 | 0.09 | 1 | HC_vs_MS.Trt_F |
| GNPAT     | 0.51547 | -0.737  | 0.168 | 0.18 | 1 | HC_vs_MS.Trt_F |
| FPR1      | 0.51552 | 0.60779 | 0.506 | 0.48 | 1 | HC_vs_MS.Trt_F |
| MRPL32    | 0.51569 | -0.5751 | 0.168 | 0.18 | 1 | HC_vs_MS.Trt_F |
| TADA1     | 0.51571 | -0.5387 | 0.104 | 0.09 | 1 | HC_vs_MS.Trt_F |
| MED30     | 0.51573 | -0.6613 | 0.124 | 0.14 | 1 | HC_vs_MS.Trt_F |
| UAP1      | 0.51574 | -0.5797 | 0.092 | 0.11 | 1 | HC_vs_MS.Trt_F |
| VPS4B     | 0.51588 | -0.4671 | 0.803 | 0.76 | 1 | HC_vs_MS.Trt_F |
| LYRM9     | 0.51616 | 0.52171 | 0.199 | 0.18 | 1 | HC_vs_MS.Trt_F |
| PAK6      | 0.51686 | 0.33675 | 0.179 | 0.16 | 1 | HC_vs_MS.Trt_F |
| NT5DC3    | 0.51704 | -0.4384 | 0.829 | 0.83 | 1 | HC_vs_MS.Trt_F |
| PTK6      | 0.51708 | 0.48274 | 0.405 | 0.39 | 1 | HC_vs_MS.Trt_F |
| WDR55     | 0.51709 | 0.25094 | 0.717 | 0.68 | 1 | HC_vs_MS.Trt_F |
| KRT10     | 0.51712 | -0.5944 | 0.113 | 0.13 | 1 | HC_vs_MS.Trt_F |
| AGA       | 0.51745 | -0.4088 | 0.121 | 0.14 | 1 | HC_vs_MS.Trt_F |
| FASTKD3   | 0.51794 | -0.6524 | 0.09  | 0.1  | 1 | HC_vs_MS.Trt_F |
| STOM      | 0.51804 | 0.27969 | 0.668 | 0.66 | 1 | HC_vs_MS.Trt_F |
| CELSR3    | 0.51811 | 0.52997 | 0.113 | 0.1  | 1 | HC_vs_MS.Trt_F |
| LRRC1     | 0.51852 | -1.031  | 0.306 | 0.32 | 1 | HC_vs_MS.Trt_F |
| OSTF1     | 0.5186  | -0.5888 | 0.327 | 0.29 | 1 | HC_vs_MS.Trt_F |
| MAP2K2    | 0.51894 | -0.8059 | 0.766 | 0.71 | 1 | HC_vs_MS.Trt_F |
| C2orf88   | 0.51926 | 0.55893 | 0.358 | 0.34 | 1 | HC_vs_MS.Trt_F |
| MYO7A     | 0.51958 | 0.43948 | 0.361 | 0.39 | 1 | HC_vs_MS.Trt_F |
| SNRPB     | 0.51977 | -0.4068 | 0.24  | 0.21 | 1 | HC_vs_MS.Trt_F |
| LRRC8D    | 0.51984 | -0.7169 | 0.145 | 0.12 | 1 | HC_vs_MS.Trt_F |
| IDI1      | 0.52002 | -0.3665 | 0.243 | 0.21 | 1 | HC_vs_MS.Trt_F |
| ZNF37A    | 0.52068 | -0.9318 | 0.916 | 0.86 | 1 | HC_vs_MS.Trt_F |
| SLC39A5   | 0.52072 | 0.63622 | 0.24  | 0.22 | 1 | HC_vs_MS.Trt_F |
| FAM188A   | 0.52084 | -0.4153 | 0.133 | 0.12 | 1 | HC_vs_MS.Trt_F |
| HIST1H2AG | 0.52102 | 0.50453 | 0.37  | 0.34 | 1 | HC_vs_MS.Trt_F |
| CAMKMT    | 0.52111 | -0.332  | 0.286 | 0.31 | 1 | HC_vs_MS.Trt_F |
| TECPR2    | 0.52133 | 1.65207 | 0.338 | 0.36 | 1 | HC_vs_MS.Trt_F |
| PRKCSH    | 0.52185 | 0.25724 | 0.725 | 0.72 | 1 | HC_vs_MS.Trt_F |
| TP53BP1   | 0.52186 | -1.109  | 0.306 | 0.32 | 1 | HC_vs_MS.Trt_F |
| MRPL14    | 0.52192 | -0.5802 | 0.136 | 0.12 | 1 | HC_vs_MS.Trt_F |

|            |         |         |       |      |   |                |
|------------|---------|---------|-------|------|---|----------------|
| DYNLL2     | 0.52194 | -0.6475 | 0.133 | 0.15 | 1 | HC_vs_MS.Trt_F |
| UTP23      | 0.52232 | -0.2606 | 0.59  | 0.57 | 1 | HC_vs_MS.Trt_F |
| COMMD5     | 0.5224  | -0.4734 | 0.098 | 0.11 | 1 | HC_vs_MS.Trt_F |
| LRRN3      | 0.52291 | -1.5035 | 0.121 | 0.14 | 1 | HC_vs_MS.Trt_F |
| GRAMD2     | 0.52335 | 0.45619 | 0.572 | 0.55 | 1 | HC_vs_MS.Trt_F |
| FNDC3B     | 0.52344 | 0.50178 | 0.783 | 0.75 | 1 | HC_vs_MS.Trt_F |
| ZNF394     | 0.52444 | 0.28008 | 0.509 | 0.55 | 1 | HC_vs_MS.Trt_F |
| B3GALNT1   | 0.52446 | -0.4622 | 0.228 | 0.21 | 1 | HC_vs_MS.Trt_F |
| CASP7      | 0.52447 | 1.16993 | 0.191 | 0.17 | 1 | HC_vs_MS.Trt_F |
| SUCLA2     | 0.52448 | -0.3506 | 0.147 | 0.13 | 1 | HC_vs_MS.Trt_F |
| PADI2      | 0.52468 | 0.39496 | 0.315 | 0.28 | 1 | HC_vs_MS.Trt_F |
| HNRNPH3    | 0.52485 | -0.4037 | 0.251 | 0.22 | 1 | HC_vs_MS.Trt_F |
| LRTOMT     | 0.5258  | -0.3879 | 0.87  | 0.85 | 1 | HC_vs_MS.Trt_F |
| HTATSF1    | 0.5266  | -1.1412 | 0.159 | 0.17 | 1 | HC_vs_MS.Trt_F |
| PPIL6      | 0.52664 | 0.36246 | 0.54  | 0.53 | 1 | HC_vs_MS.Trt_F |
| TMEM179B   | 0.52679 | -0.5744 | 0.205 | 0.22 | 1 | HC_vs_MS.Trt_F |
| GCSAML     | 0.52687 | 0.71556 | 0.338 | 0.32 | 1 | HC_vs_MS.Trt_F |
| IFI27L2    | 0.52717 | -0.8595 | 0.251 | 0.26 | 1 | HC_vs_MS.Trt_F |
| VPS26A     | 0.52724 | -0.5903 | 0.408 | 0.38 | 1 | HC_vs_MS.Trt_F |
| TUBGCP3    | 0.52735 | -0.2828 | 0.165 | 0.14 | 1 | HC_vs_MS.Trt_F |
| STK38      | 0.52774 | -0.3947 | 0.46  | 0.45 | 1 | HC_vs_MS.Trt_F |
| APEX2      | 0.52776 | 0.64308 | 0.402 | 0.37 | 1 | HC_vs_MS.Trt_F |
| HIST2H2AA3 | 0.52788 | 0.28364 | 0.124 | 0.11 | 1 | HC_vs_MS.Trt_F |
| HINT1      | 0.52861 | -0.2759 | 0.772 | 0.72 | 1 | HC_vs_MS.Trt_F |
| SCARF1     | 0.52907 | 0.50371 | 0.486 | 0.46 | 1 | HC_vs_MS.Trt_F |
| ITGAV      | 0.52917 | -0.2848 | 0.133 | 0.12 | 1 | HC_vs_MS.Trt_F |
| CCDC146    | 0.52952 | 0.37866 | 0.104 | 0.09 | 1 | HC_vs_MS.Trt_F |
| GNL3       | 0.52957 | -0.6482 | 0.162 | 0.14 | 1 | HC_vs_MS.Trt_F |
| TUNAR      | 0.5297  | 1.31306 | 0.168 | 0.15 | 1 | HC_vs_MS.Trt_F |
| LEAP2      | 0.52994 | 0.25205 | 0.26  | 0.23 | 1 | HC_vs_MS.Trt_F |
| EPC2       | 0.53009 | 0.49992 | 0.118 | 0.1  | 1 | HC_vs_MS.Trt_F |
| DNAAF2     | 0.5301  | 0.25498 | 0.118 | 0.1  | 1 | HC_vs_MS.Trt_F |
| PSMC4      | 0.53015 | -0.4449 | 0.543 | 0.48 | 1 | HC_vs_MS.Trt_F |
| SLC35E1    | 0.53018 | 0.50083 | 0.991 | 0.97 | 1 | HC_vs_MS.Trt_F |
| FUT4       | 0.53048 | -0.3531 | 0.39  | 0.35 | 1 | HC_vs_MS.Trt_F |
| COPS4      | 0.5307  | -0.7863 | 0.491 | 0.45 | 1 | HC_vs_MS.Trt_F |
| RWDD2A     | 0.53089 | -0.5461 | 0.52  | 0.5  | 1 | HC_vs_MS.Trt_F |
| CTD-2207O2 | 0.53089 | -0.6573 | 0.168 | 0.18 | 1 | HC_vs_MS.Trt_F |
| METTL12    | 0.53183 | 0.59391 | 0.725 | 0.66 | 1 | HC_vs_MS.Trt_F |
| DNAJA3     | 0.53282 | -0.4626 | 0.962 | 0.91 | 1 | HC_vs_MS.Trt_F |

|          |         |         |       |      |   |                |
|----------|---------|---------|-------|------|---|----------------|
| DOCK9    | 0.53302 | 0.455   | 0.338 | 0.3  | 1 | HC_vs_MS.Trt_F |
| FAM111A  | 0.53314 | -1.3078 | 0.552 | 0.53 | 1 | HC_vs_MS.Trt_F |
| SLC12A9  | 0.5344  | 0.34815 | 0.902 | 0.87 | 1 | HC_vs_MS.Trt_F |
| PAFAH1B3 | 0.53445 | 0.3338  | 0.11  | 0.09 | 1 | HC_vs_MS.Trt_F |
| ATAD3C   | 0.53451 | -0.2608 | 0.824 | 0.86 | 1 | HC_vs_MS.Trt_F |
| RAP2B    | 0.53619 | -0.347  | 0.697 | 0.64 | 1 | HC_vs_MS.Trt_F |
| ZNF70    | 0.53649 | -0.4046 | 0.893 | 0.87 | 1 | HC_vs_MS.Trt_F |
| ACTG2    | 0.53657 | 1.10628 | 0.277 | 0.26 | 1 | HC_vs_MS.Trt_F |
| CD27     | 0.53665 | -0.3518 | 0.517 | 0.5  | 1 | HC_vs_MS.Trt_F |
| IL5RA    | 0.53685 | 1.64825 | 0.318 | 0.29 | 1 | HC_vs_MS.Trt_F |
| SYPL1    | 0.53698 | -0.35   | 0.439 | 0.41 | 1 | HC_vs_MS.Trt_F |
| DHX33    | 0.53699 | -0.3423 | 0.341 | 0.35 | 1 | HC_vs_MS.Trt_F |
| MED14    | 0.53707 | -0.4259 | 0.188 | 0.16 | 1 | HC_vs_MS.Trt_F |
| PPP1R9A  | 0.53718 | 0.32472 | 0.225 | 0.24 | 1 | HC_vs_MS.Trt_F |
| MED13L   | 0.53732 | -0.373  | 0.13  | 0.14 | 1 | HC_vs_MS.Trt_F |
| MROH8    | 0.53769 | -0.4695 | 0.373 | 0.39 | 1 | HC_vs_MS.Trt_F |
| ITIH5    | 0.53798 | 0.25107 | 0.818 | 0.81 | 1 | HC_vs_MS.Trt_F |
| LSM3     | 0.53856 | 0.46024 | 0.624 | 0.59 | 1 | HC_vs_MS.Trt_F |
| AFF3     | 0.53867 | 0.62421 | 0.806 | 0.75 | 1 | HC_vs_MS.Trt_F |
| SOS2     | 0.53909 | -0.8821 | 0.136 | 0.12 | 1 | HC_vs_MS.Trt_F |
| CHERP    | 0.53914 | -0.285  | 0.191 | 0.17 | 1 | HC_vs_MS.Trt_F |
| PLRG1    | 0.53914 | 0.3183  | 0.145 | 0.13 | 1 | HC_vs_MS.Trt_F |
| BRD4     | 0.53956 | -0.3807 | 0.353 | 0.32 | 1 | HC_vs_MS.Trt_F |
| REXO1    | 0.53995 | 1.16748 | 0.118 | 0.1  | 1 | HC_vs_MS.Trt_F |
| TOR1B    | 0.54003 | -0.5388 | 0.277 | 0.26 | 1 | HC_vs_MS.Trt_F |
| MAP3K10  | 0.54074 | 0.28918 | 0.39  | 0.34 | 1 | HC_vs_MS.Trt_F |
| ZNF836   | 0.54083 | -0.5936 | 0.251 | 0.22 | 1 | HC_vs_MS.Trt_F |
| ZNF80    | 0.54094 | -0.5134 | 0.246 | 0.22 | 1 | HC_vs_MS.Trt_F |
| SNURF    | 0.54152 | -0.2654 | 0.199 | 0.18 | 1 | HC_vs_MS.Trt_F |
| C14orf80 | 0.54198 | 0.79627 | 0.324 | 0.28 | 1 | HC_vs_MS.Trt_F |
| KIAA0368 | 0.54206 | 0.42593 | 0.272 | 0.25 | 1 | HC_vs_MS.Trt_F |
| DDX39A   | 0.54276 | -0.435  | 0.355 | 0.36 | 1 | HC_vs_MS.Trt_F |
| SPTB     | 0.54308 | -0.2576 | 0.471 | 0.45 | 1 | HC_vs_MS.Trt_F |
| ZC3H15   | 0.54317 | -0.6876 | 0.188 | 0.2  | 1 | HC_vs_MS.Trt_F |
| KLHL21   | 0.5434  | 0.275   | 0.76  | 0.73 | 1 | HC_vs_MS.Trt_F |
| RRP9     | 0.54374 | 0.81416 | 0.118 | 0.1  | 1 | HC_vs_MS.Trt_F |
| NLRP2    | 0.54404 | -0.5067 | 0.85  | 0.82 | 1 | HC_vs_MS.Trt_F |
| KANK3    | 0.54405 | 0.34847 | 0.277 | 0.3  | 1 | HC_vs_MS.Trt_F |
| ATG12    | 0.5442  | -0.4634 | 0.789 | 0.77 | 1 | HC_vs_MS.Trt_F |
| CIITA    | 0.54441 | -0.776  | 0.962 | 0.91 | 1 | HC_vs_MS.Trt_F |



|           |         |         |       |      |   |                |
|-----------|---------|---------|-------|------|---|----------------|
| ANKRD28   | 0.54489 | 0.71677 | 0.439 | 0.41 | 1 | HC_vs_MS.Trt_F |
| RNASSET2  | 0.54545 | -0.4261 | 0.434 | 0.44 | 1 | HC_vs_MS.Trt_F |
| TMEM97    | 0.54583 | -1.1644 | 0.254 | 0.28 | 1 | HC_vs_MS.Trt_F |
| ERO1A     | 0.54596 | -0.6957 | 0.905 | 0.9  | 1 | HC_vs_MS.Trt_F |
| AGMO      | 0.54626 | 1.1944  | 0.272 | 0.24 | 1 | HC_vs_MS.Trt_F |
| PNPLA4    | 0.54631 | -0.6243 | 0.283 | 0.25 | 1 | HC_vs_MS.Trt_F |
| TMEM30A   | 0.54648 | -1.1574 | 0.208 | 0.22 | 1 | HC_vs_MS.Trt_F |
| UBAP2L    | 0.54661 | -0.3294 | 0.269 | 0.28 | 1 | HC_vs_MS.Trt_F |
| NTN5      | 0.54664 | -0.2751 | 0.159 | 0.14 | 1 | HC_vs_MS.Trt_F |
| SSB       | 0.54711 | -0.5774 | 0.798 | 0.73 | 1 | HC_vs_MS.Trt_F |
| C8orf76   | 0.5472  | -0.2709 | 0.592 | 0.61 | 1 | HC_vs_MS.Trt_F |
| LAPTM4A   | 0.54739 | -0.6372 | 0.228 | 0.2  | 1 | HC_vs_MS.Trt_F |
| TBPL1     | 0.54753 | -0.4911 | 0.277 | 0.25 | 1 | HC_vs_MS.Trt_F |
| RELT      | 0.54791 | 0.55467 | 0.11  | 0.1  | 1 | HC_vs_MS.Trt_F |
| ZNF512    | 0.54793 | -0.8396 | 0.142 | 0.15 | 1 | HC_vs_MS.Trt_F |
| GMPPA     | 0.54803 | -0.7785 | 0.292 | 0.3  | 1 | HC_vs_MS.Trt_F |
| COASY     | 0.5484  | 0.31571 | 0.46  | 0.44 | 1 | HC_vs_MS.Trt_F |
| CDC27     | 0.5484  | -0.4149 | 0.474 | 0.5  | 1 | HC_vs_MS.Trt_F |
| GADD45GIP | 0.54873 | -0.5983 | 0.182 | 0.16 | 1 | HC_vs_MS.Trt_F |
| FCHSD2    | 0.54875 | -0.3639 | 0.162 | 0.18 | 1 | HC_vs_MS.Trt_F |
| UBE2W     | 0.54887 | -0.4605 | 0.691 | 0.66 | 1 | HC_vs_MS.Trt_F |
| CDC25B    | 0.54924 | 0.33869 | 0.312 | 0.29 | 1 | HC_vs_MS.Trt_F |
| PTDSS2    | 0.54963 | 0.92922 | 0.107 | 0.09 | 1 | HC_vs_MS.Trt_F |
| DIABLO    | 0.54969 | -0.5719 | 0.749 | 0.74 | 1 | HC_vs_MS.Trt_F |
| LRRC37A   | 0.54979 | 0.34821 | 0.434 | 0.4  | 1 | HC_vs_MS.Trt_F |
| NDUFB7    | 0.55043 | -0.6193 | 0.243 | 0.25 | 1 | HC_vs_MS.Trt_F |
| TTC33     | 0.5521  | -0.8756 | 0.246 | 0.26 | 1 | HC_vs_MS.Trt_F |
| MAN2B1    | 0.55214 | 0.27225 | 0.639 | 0.63 | 1 | HC_vs_MS.Trt_F |
| KLF3      | 0.55218 | -0.4789 | 0.618 | 0.62 | 1 | HC_vs_MS.Trt_F |
| SS18L1    | 0.55244 | -0.6131 | 0.465 | 0.46 | 1 | HC_vs_MS.Trt_F |
| C19orf48  | 0.55279 | 0.27522 | 0.405 | 0.37 | 1 | HC_vs_MS.Trt_F |
| RDX       | 0.55333 | -0.871  | 0.286 | 0.25 | 1 | HC_vs_MS.Trt_F |
| YDJC      | 0.55456 | -0.4079 | 0.15  | 0.16 | 1 | HC_vs_MS.Trt_F |
| FUT7      | 0.55491 | -0.5553 | 0.107 | 0.12 | 1 | HC_vs_MS.Trt_F |
| EXOSC8    | 0.55534 | -0.3079 | 0.512 | 0.52 | 1 | HC_vs_MS.Trt_F |
| TRMT10C   | 0.55602 | -0.4871 | 0.121 | 0.1  | 1 | HC_vs_MS.Trt_F |
| ZSCAN20   | 0.55615 | -0.73   | 0.315 | 0.3  | 1 | HC_vs_MS.Trt_F |
| NAGA      | 0.55635 | -0.6415 | 0.13  | 0.14 | 1 | HC_vs_MS.Trt_F |
| CCT3      | 0.5565  | 0.30215 | 0.581 | 0.55 | 1 | HC_vs_MS.Trt_F |
| OCIAD2    | 0.55715 | -0.3225 | 0.662 | 0.61 | 1 | HC_vs_MS.Trt_F |

|             |         |         |       |      |   |                |
|-------------|---------|---------|-------|------|---|----------------|
| UTP14C      | 0.55746 | -1.3255 | 0.194 | 0.21 | 1 | HC_vs_MS.Trt_F |
| MCOLN3      | 0.55755 | 0.5354  | 0.517 | 0.51 | 1 | HC_vs_MS.Trt_F |
| ACOX3       | 0.55771 | -0.7854 | 0.121 | 0.13 | 1 | HC_vs_MS.Trt_F |
| MINK1       | 0.55781 | 0.35898 | 0.295 | 0.26 | 1 | HC_vs_MS.Trt_F |
| PLD1        | 0.55818 | 0.68509 | 0.549 | 0.58 | 1 | HC_vs_MS.Trt_F |
| LIN37       | 0.55833 | 0.5251  | 0.104 | 0.09 | 1 | HC_vs_MS.Trt_F |
| JADE1       | 0.55837 | -0.8352 | 0.364 | 0.38 | 1 | HC_vs_MS.Trt_F |
| CPEB4       | 0.55848 | -0.4161 | 0.197 | 0.17 | 1 | HC_vs_MS.Trt_F |
| C22orf46    | 0.55851 | -0.4418 | 0.39  | 0.36 | 1 | HC_vs_MS.Trt_F |
| IFI44       | 0.55921 | 0.28969 | 0.104 | 0.09 | 1 | HC_vs_MS.Trt_F |
| ERGIC2      | 0.55925 | 0.33538 | 0.526 | 0.47 | 1 | HC_vs_MS.Trt_F |
| MAP2K6      | 0.55937 | 0.39548 | 0.408 | 0.38 | 1 | HC_vs_MS.Trt_F |
| TRMT13      | 0.56012 | -0.4177 | 0.118 | 0.13 | 1 | HC_vs_MS.Trt_F |
| SMIM15      | 0.56087 | -0.3687 | 0.104 | 0.12 | 1 | HC_vs_MS.Trt_F |
| FHDC1       | 0.56135 | -0.5498 | 0.506 | 0.49 | 1 | HC_vs_MS.Trt_F |
| PODN        | 0.56152 | 1.60664 | 0.436 | 0.42 | 1 | HC_vs_MS.Trt_F |
| IMMT        | 0.56187 | -0.6796 | 0.486 | 0.44 | 1 | HC_vs_MS.Trt_F |
| KDM7A       | 0.56189 | -0.2538 | 0.254 | 0.26 | 1 | HC_vs_MS.Trt_F |
| TFIP11      | 0.56223 | -1.0664 | 0.549 | 0.49 | 1 | HC_vs_MS.Trt_F |
| C15orf38-AF | 0.56245 | -0.5028 | 0.402 | 0.37 | 1 | HC_vs_MS.Trt_F |
| SETMAR      | 0.56249 | -1.0434 | 0.332 | 0.33 | 1 | HC_vs_MS.Trt_F |
| COX6C       | 0.56253 | -0.6048 | 0.503 | 0.49 | 1 | HC_vs_MS.Trt_F |
| MAGIX       | 0.56268 | -0.3955 | 0.523 | 0.51 | 1 | HC_vs_MS.Trt_F |
| SULF2       | 0.563   | 0.27502 | 0.139 | 0.12 | 1 | HC_vs_MS.Trt_F |
| NFKB1       | 0.56306 | -1.5396 | 0.15  | 0.13 | 1 | HC_vs_MS.Trt_F |
| KTN1        | 0.56338 | -0.8273 | 0.604 | 0.57 | 1 | HC_vs_MS.Trt_F |
| OGFR        | 0.56365 | 0.28825 | 0.223 | 0.2  | 1 | HC_vs_MS.Trt_F |
| P3H2        | 0.56402 | 0.5107  | 0.517 | 0.47 | 1 | HC_vs_MS.Trt_F |
| SERP1       | 0.56418 | -0.4921 | 0.584 | 0.59 | 1 | HC_vs_MS.Trt_F |
| AKAP8       | 0.56438 | 0.39726 | 0.422 | 0.39 | 1 | HC_vs_MS.Trt_F |
| AK1         | 0.56445 | -0.7825 | 0.121 | 0.1  | 1 | HC_vs_MS.Trt_F |
| SAXO2       | 0.56455 | 0.33233 | 0.269 | 0.24 | 1 | HC_vs_MS.Trt_F |
| CSMD1       | 0.56493 | 0.69077 | 0.361 | 0.33 | 1 | HC_vs_MS.Trt_F |
| ELMO2       | 0.56519 | -0.6409 | 0.246 | 0.21 | 1 | HC_vs_MS.Trt_F |
| STX2        | 0.5653  | -0.418  | 0.52  | 0.48 | 1 | HC_vs_MS.Trt_F |
| EID1        | 0.56581 | -0.3753 | 0.379 | 0.38 | 1 | HC_vs_MS.Trt_F |
| NLN         | 0.56584 | -0.4423 | 0.754 | 0.73 | 1 | HC_vs_MS.Trt_F |
| MED1        | 0.56587 | -0.5271 | 0.396 | 0.36 | 1 | HC_vs_MS.Trt_F |
| TRIM68      | 0.5662  | 0.52166 | 0.618 | 0.56 | 1 | HC_vs_MS.Trt_F |
| TSEN15      | 0.56643 | -0.5102 | 0.237 | 0.21 | 1 | HC_vs_MS.Trt_F |

|         |         |         |       |      |   |                |
|---------|---------|---------|-------|------|---|----------------|
| RAD52   | 0.56649 | 0.32966 | 0.254 | 0.27 | 1 | HC_vs_MS.Trt_F |
| FIGNL1  | 0.56666 | -0.3677 | 0.171 | 0.15 | 1 | HC_vs_MS.Trt_F |
| PIAS1   | 0.56781 | -0.2507 | 0.379 | 0.34 | 1 | HC_vs_MS.Trt_F |
| SPPL2A  | 0.56799 | 0.44555 | 0.951 | 0.93 | 1 | HC_vs_MS.Trt_F |
| MAZ     | 0.56805 | 0.31809 | 0.182 | 0.17 | 1 | HC_vs_MS.Trt_F |
| PRMT9   | 0.56841 | -0.2627 | 0.223 | 0.2  | 1 | HC_vs_MS.Trt_F |
| UBE2D4  | 0.56843 | -0.5714 | 0.699 | 0.72 | 1 | HC_vs_MS.Trt_F |
| NUDT19  | 0.56865 | -0.815  | 0.876 | 0.89 | 1 | HC_vs_MS.Trt_F |
| DIAPH2  | 0.56875 | 0.31181 | 0.341 | 0.32 | 1 | HC_vs_MS.Trt_F |
| CARD6   | 0.5689  | -0.4636 | 0.552 | 0.51 | 1 | HC_vs_MS.Trt_F |
| CLOCK   | 0.56902 | -0.6497 | 0.171 | 0.18 | 1 | HC_vs_MS.Trt_F |
| RANGAP1 | 0.56927 | 0.40514 | 0.754 | 0.73 | 1 | HC_vs_MS.Trt_F |
| ZNF652  | 0.56957 | -1.0783 | 0.581 | 0.53 | 1 | HC_vs_MS.Trt_F |
| ATP5G1  | 0.56962 | -0.8036 | 0.306 | 0.32 | 1 | HC_vs_MS.Trt_F |
| FAM220A | 0.57051 | 0.85032 | 0.367 | 0.34 | 1 | HC_vs_MS.Trt_F |
| AKR1B10 | 0.57059 | 0.44907 | 0.488 | 0.48 | 1 | HC_vs_MS.Trt_F |
| FAM134C | 0.57066 | -0.39   | 0.694 | 0.63 | 1 | HC_vs_MS.Trt_F |
| LIG3    | 0.57122 | 1.16681 | 0.289 | 0.27 | 1 | HC_vs_MS.Trt_F |
| UNC119  | 0.5715  | -0.7565 | 0.101 | 0.11 | 1 | HC_vs_MS.Trt_F |
| GNB1    | 0.57195 | -0.3042 | 0.329 | 0.35 | 1 | HC_vs_MS.Trt_F |
| SHARPIN | 0.57212 | -0.327  | 0.139 | 0.15 | 1 | HC_vs_MS.Trt_F |
| ZNF587B | 0.57216 | -0.2719 | 0.35  | 0.31 | 1 | HC_vs_MS.Trt_F |
| POLE    | 0.57246 | -0.3204 | 0.882 | 0.83 | 1 | HC_vs_MS.Trt_F |
| SNRNP48 | 0.57262 | 0.50558 | 0.208 | 0.22 | 1 | HC_vs_MS.Trt_F |
| BLM     | 0.57263 | -0.3706 | 0.292 | 0.27 | 1 | HC_vs_MS.Trt_F |
| CCDC88A | 0.5727  | -0.2807 | 0.705 | 0.66 | 1 | HC_vs_MS.Trt_F |
| CUL3    | 0.57317 | -0.2622 | 0.347 | 0.31 | 1 | HC_vs_MS.Trt_F |
| ATP11A  | 0.57321 | -0.2626 | 0.292 | 0.27 | 1 | HC_vs_MS.Trt_F |
| ZNF223  | 0.57391 | -1.0209 | 0.104 | 0.12 | 1 | HC_vs_MS.Trt_F |
| TMTC3   | 0.57392 | -0.3425 | 0.269 | 0.24 | 1 | HC_vs_MS.Trt_F |
| LSM12   | 0.57398 | -0.3804 | 0.656 | 0.67 | 1 | HC_vs_MS.Trt_F |
| MIS12   | 0.5741  | -0.3939 | 0.341 | 0.31 | 1 | HC_vs_MS.Trt_F |
| ARID5A  | 0.57413 | -0.4509 | 0.225 | 0.23 | 1 | HC_vs_MS.Trt_F |
| PPT2    | 0.57416 | 0.63392 | 0.604 | 0.58 | 1 | HC_vs_MS.Trt_F |
| PDS5B   | 0.57445 | -0.4446 | 0.344 | 0.36 | 1 | HC_vs_MS.Trt_F |
| STK39   | 0.57466 | 0.35114 | 0.162 | 0.14 | 1 | HC_vs_MS.Trt_F |
| C4orf3  | 0.57473 | -0.65   | 0.497 | 0.48 | 1 | HC_vs_MS.Trt_F |
| MTMR14  | 0.57478 | -0.3203 | 0.656 | 0.61 | 1 | HC_vs_MS.Trt_F |
| TNPO2   | 0.57587 | 1.12033 | 0.168 | 0.15 | 1 | HC_vs_MS.Trt_F |
| TXNDC16 | 0.57629 | -0.3481 | 0.133 | 0.12 | 1 | HC_vs_MS.Trt_F |

|            |         |         |       |      |   |                |
|------------|---------|---------|-------|------|---|----------------|
| LST1       | 0.57663 | 0.44732 | 0.272 | 0.26 | 1 | HC_vs_MS.Trt_F |
| BTN2A1     | 0.57686 | -0.5326 | 0.156 | 0.17 | 1 | HC_vs_MS.Trt_F |
| NECAB1     | 0.57695 | 0.45463 | 0.156 | 0.14 | 1 | HC_vs_MS.Trt_F |
| UBAP1      | 0.5771  | -0.3013 | 0.153 | 0.13 | 1 | HC_vs_MS.Trt_F |
| CPSF6      | 0.57745 | 0.26554 | 0.396 | 0.42 | 1 | HC_vs_MS.Trt_F |
| ZC2HC1C    | 0.57745 | -0.6451 | 0.124 | 0.14 | 1 | HC_vs_MS.Trt_F |
| SH2D3A     | 0.57786 | 0.4445  | 0.945 | 0.95 | 1 | HC_vs_MS.Trt_F |
| SLC25A24   | 0.57787 | -0.4346 | 0.121 | 0.13 | 1 | HC_vs_MS.Trt_F |
| TNKS       | 0.57792 | 0.68229 | 0.844 | 0.81 | 1 | HC_vs_MS.Trt_F |
| BEX4       | 0.57823 | -0.572  | 0.113 | 0.12 | 1 | HC_vs_MS.Trt_F |
| PYGB       | 0.57828 | -0.2696 | 0.165 | 0.14 | 1 | HC_vs_MS.Trt_F |
| TACO1      | 0.57843 | 1.11676 | 0.393 | 0.39 | 1 | HC_vs_MS.Trt_F |
| ARID5B     | 0.57862 | -0.5001 | 0.864 | 0.77 | 1 | HC_vs_MS.Trt_F |
| S1PR1      | 0.57865 | -0.3758 | 0.465 | 0.43 | 1 | HC_vs_MS.Trt_F |
| ANKRD13C   | 0.57884 | -0.9607 | 0.145 | 0.12 | 1 | HC_vs_MS.Trt_F |
| CRAMP1     | 0.57912 | -0.616  | 0.104 | 0.09 | 1 | HC_vs_MS.Trt_F |
| RFC5       | 0.57944 | -0.5842 | 0.199 | 0.18 | 1 | HC_vs_MS.Trt_F |
| RGPD3      | 0.57962 | 0.32868 | 0.104 | 0.09 | 1 | HC_vs_MS.Trt_F |
| CECR5      | 0.57995 | -0.3118 | 0.214 | 0.19 | 1 | HC_vs_MS.Trt_F |
| RP11-15H20 | 0.57998 | 0.54066 | 0.136 | 0.15 | 1 | HC_vs_MS.Trt_F |
| SMS        | 0.58001 | -0.3524 | 0.185 | 0.16 | 1 | HC_vs_MS.Trt_F |
| ZNF100     | 0.58034 | 0.27408 | 0.864 | 0.84 | 1 | HC_vs_MS.Trt_F |
| FBXO9      | 0.58039 | 0.25897 | 0.803 | 0.81 | 1 | HC_vs_MS.Trt_F |
| MGA        | 0.58041 | -0.3231 | 0.908 | 0.88 | 1 | HC_vs_MS.Trt_F |
| AASDHPPT   | 0.58064 | -0.2634 | 0.231 | 0.21 | 1 | HC_vs_MS.Trt_F |
| PYGO2      | 0.58114 | -0.4113 | 0.173 | 0.15 | 1 | HC_vs_MS.Trt_F |
| MRPL35     | 0.58193 | -1.0711 | 0.156 | 0.13 | 1 | HC_vs_MS.Trt_F |
| TOE1       | 0.58217 | -1.0977 | 0.09  | 0.1  | 1 | HC_vs_MS.Trt_F |
| COPS9      | 0.58233 | -0.5517 | 0.176 | 0.19 | 1 | HC_vs_MS.Trt_F |
| AEN        | 0.58262 | 0.49814 | 0.153 | 0.14 | 1 | HC_vs_MS.Trt_F |
| PPP1R3F    | 0.5827  | -0.3102 | 0.162 | 0.14 | 1 | HC_vs_MS.Trt_F |
| PPP6R1     | 0.5828  | -0.3079 | 0.355 | 0.31 | 1 | HC_vs_MS.Trt_F |
| ZNF576     | 0.58302 | -0.3641 | 0.546 | 0.54 | 1 | HC_vs_MS.Trt_F |
| NCBP2-AS2  | 0.58305 | -0.3236 | 0.139 | 0.12 | 1 | HC_vs_MS.Trt_F |
| FMR1       | 0.5831  | -0.3202 | 0.153 | 0.14 | 1 | HC_vs_MS.Trt_F |
| GALNT3     | 0.58319 | -0.6514 | 0.095 | 0.11 | 1 | HC_vs_MS.Trt_F |
| CWC27      | 0.58344 | 0.40178 | 0.168 | 0.15 | 1 | HC_vs_MS.Trt_F |
| XYLT1      | 0.58345 | 0.57558 | 0.162 | 0.14 | 1 | HC_vs_MS.Trt_F |
| TSPAN17    | 0.58376 | -0.4271 | 0.133 | 0.12 | 1 | HC_vs_MS.Trt_F |
| RAB9A      | 0.58377 | -0.801  | 0.116 | 0.13 | 1 | HC_vs_MS.Trt_F |

|             |         |         |       |      |   |                |
|-------------|---------|---------|-------|------|---|----------------|
| GTF2E1      | 0.58389 | 0.94022 | 0.295 | 0.32 | 1 | HC_vs_MS.Trt_F |
| SQRDL       | 0.58393 | -0.32   | 0.171 | 0.15 | 1 | HC_vs_MS.Trt_F |
| MRPS12      | 0.58418 | -0.3356 | 0.436 | 0.42 | 1 | HC_vs_MS.Trt_F |
| MRPS23      | 0.58422 | -0.4005 | 0.858 | 0.84 | 1 | HC_vs_MS.Trt_F |
| H2AFZ       | 0.58433 | -0.2784 | 0.39  | 0.35 | 1 | HC_vs_MS.Trt_F |
| ZFP37       | 0.58447 | -0.8703 | 0.425 | 0.43 | 1 | HC_vs_MS.Trt_F |
| ARL6IP4     | 0.58475 | -0.3693 | 0.306 | 0.31 | 1 | HC_vs_MS.Trt_F |
| GART        | 0.58521 | -0.2902 | 0.858 | 0.84 | 1 | HC_vs_MS.Trt_F |
| PYCR2       | 0.58531 | 0.42192 | 0.679 | 0.66 | 1 | HC_vs_MS.Trt_F |
| ABHD17B     | 0.58578 | -0.4766 | 0.303 | 0.27 | 1 | HC_vs_MS.Trt_F |
| AKAP5       | 0.58614 | 0.3864  | 0.662 | 0.66 | 1 | HC_vs_MS.Trt_F |
| C14orf2     | 0.58619 | -0.5871 | 0.855 | 0.8  | 1 | HC_vs_MS.Trt_F |
| PMF1-BGLA   | 0.58667 | -0.4755 | 0.11  | 0.12 | 1 | HC_vs_MS.Trt_F |
| LEPR        | 0.58696 | 0.42249 | 0.373 | 0.36 | 1 | HC_vs_MS.Trt_F |
| PGAP2       | 0.58699 | -0.3053 | 0.107 | 0.09 | 1 | HC_vs_MS.Trt_F |
| SEC61G      | 0.58764 | -0.4963 | 0.312 | 0.32 | 1 | HC_vs_MS.Trt_F |
| CCDC117     | 0.58773 | -0.8679 | 0.416 | 0.37 | 1 | HC_vs_MS.Trt_F |
| SLC9A3R1    | 0.5883  | -0.4028 | 0.384 | 0.35 | 1 | HC_vs_MS.Trt_F |
| SLC48A1     | 0.58846 | -0.7931 | 0.633 | 0.59 | 1 | HC_vs_MS.Trt_F |
| ZNF574      | 0.5889  | 0.26495 | 0.373 | 0.39 | 1 | HC_vs_MS.Trt_F |
| VPS16       | 0.58915 | -0.6503 | 0.153 | 0.13 | 1 | HC_vs_MS.Trt_F |
| CACNG8      | 0.58931 | 0.28868 | 0.835 | 0.82 | 1 | HC_vs_MS.Trt_F |
| RBM19       | 0.58973 | -0.557  | 0.451 | 0.45 | 1 | HC_vs_MS.Trt_F |
| HNRNPK      | 0.5907  | -0.263  | 0.708 | 0.67 | 1 | HC_vs_MS.Trt_F |
| CCDC126     | 0.59093 | -0.6202 | 0.118 | 0.1  | 1 | HC_vs_MS.Trt_F |
| MDC1        | 0.59127 | -0.4929 | 0.104 | 0.12 | 1 | HC_vs_MS.Trt_F |
| CNNM2       | 0.59166 | 1.38832 | 0.341 | 0.32 | 1 | HC_vs_MS.Trt_F |
| GABARAPL2   | 0.59204 | -0.2773 | 0.555 | 0.48 | 1 | HC_vs_MS.Trt_F |
| PDGFRA      | 0.59253 | 0.38038 | 0.243 | 0.22 | 1 | HC_vs_MS.Trt_F |
| CTB-50L17.1 | 0.59287 | -0.3479 | 0.65  | 0.61 | 1 | HC_vs_MS.Trt_F |
| TANC1       | 0.59334 | 0.30358 | 0.376 | 0.38 | 1 | HC_vs_MS.Trt_F |
| CACNB2      | 0.5935  | -0.5339 | 0.471 | 0.47 | 1 | HC_vs_MS.Trt_F |
| UMPS        | 0.59389 | -0.3372 | 0.688 | 0.68 | 1 | HC_vs_MS.Trt_F |
| TBC1D23     | 0.59397 | -0.2686 | 0.15  | 0.13 | 1 | HC_vs_MS.Trt_F |
| RNF13       | 0.59506 | -0.7893 | 0.199 | 0.17 | 1 | HC_vs_MS.Trt_F |
| SLC26A8     | 0.5954  | 0.32205 | 0.731 | 0.71 | 1 | HC_vs_MS.Trt_F |
| GPR22       | 0.59552 | -0.4437 | 0.127 | 0.11 | 1 | HC_vs_MS.Trt_F |
| MFSD14B     | 0.59552 | -0.5552 | 0.139 | 0.12 | 1 | HC_vs_MS.Trt_F |
| MPG         | 0.59562 | -0.4569 | 0.165 | 0.17 | 1 | HC_vs_MS.Trt_F |
| FEM1C       | 0.5959  | -0.7043 | 0.147 | 0.16 | 1 | HC_vs_MS.Trt_F |

|           |         |         |       |      |   |                |
|-----------|---------|---------|-------|------|---|----------------|
| RAB5A     | 0.59608 | -0.5438 | 0.176 | 0.16 | 1 | HC_vs_MS.Trt_F |
| ARPC5L    | 0.59619 | -0.5477 | 0.197 | 0.21 | 1 | HC_vs_MS.Trt_F |
| C16orf45  | 0.59626 | 0.54087 | 0.22  | 0.2  | 1 | HC_vs_MS.Trt_F |
| ADPRHL2   | 0.59652 | -1.3096 | 0.095 | 0.1  | 1 | HC_vs_MS.Trt_F |
| C14orf159 | 0.59666 | 0.57914 | 0.592 | 0.62 | 1 | HC_vs_MS.Trt_F |
| KATNA1    | 0.59669 | -1.2952 | 0.113 | 0.12 | 1 | HC_vs_MS.Trt_F |
| ZNF432    | 0.59688 | 1.06183 | 0.642 | 0.62 | 1 | HC_vs_MS.Trt_F |
| FAM104A   | 0.59705 | -0.7974 | 0.191 | 0.2  | 1 | HC_vs_MS.Trt_F |
| TTYH2     | 0.59732 | -0.3911 | 0.116 | 0.1  | 1 | HC_vs_MS.Trt_F |
| TNFAIP8   | 0.59759 | -0.5117 | 0.899 | 0.84 | 1 | HC_vs_MS.Trt_F |
| SAFB      | 0.5977  | -0.6304 | 0.379 | 0.37 | 1 | HC_vs_MS.Trt_F |
| INPP5B    | 0.59795 | -0.3183 | 0.96  | 0.95 | 1 | HC_vs_MS.Trt_F |
| NELFCD    | 0.59807 | 0.40873 | 0.598 | 0.59 | 1 | HC_vs_MS.Trt_F |
| LRRC69    | 0.59872 | -0.2674 | 0.595 | 0.58 | 1 | HC_vs_MS.Trt_F |
| GIGYF2    | 0.59873 | -0.5194 | 0.925 | 0.89 | 1 | HC_vs_MS.Trt_F |
| ARHGAP44  | 0.59877 | -1.0486 | 0.329 | 0.31 | 1 | HC_vs_MS.Trt_F |
| TMEM19    | 0.599   | -0.4251 | 0.772 | 0.8  | 1 | HC_vs_MS.Trt_F |
| ZNF665    | 0.59909 | -0.3921 | 0.954 | 0.92 | 1 | HC_vs_MS.Trt_F |
| RAB36     | 0.59918 | 0.58427 | 0.39  | 0.36 | 1 | HC_vs_MS.Trt_F |
| AK6       | 0.59988 | -0.9605 | 0.234 | 0.24 | 1 | HC_vs_MS.Trt_F |
| LPCAT3    | 0.60037 | -0.4051 | 0.486 | 0.44 | 1 | HC_vs_MS.Trt_F |
| ADGRG1    | 0.6004  | -0.918  | 0.749 | 0.69 | 1 | HC_vs_MS.Trt_F |
| DDX20     | 0.60047 | -0.433  | 0.116 | 0.1  | 1 | HC_vs_MS.Trt_F |
| HSPE1-MOB | 0.60055 | -0.592  | 0.101 | 0.11 | 1 | HC_vs_MS.Trt_F |
| TBC1D9B   | 0.60057 | -0.7356 | 0.503 | 0.45 | 1 | HC_vs_MS.Trt_F |
| DNMBP     | 0.60093 | 0.56659 | 0.101 | 0.09 | 1 | HC_vs_MS.Trt_F |
| ZBTB25    | 0.6017  | -0.4568 | 0.983 | 0.98 | 1 | HC_vs_MS.Trt_F |
| SLC25A5   | 0.60206 | -0.3486 | 0.347 | 0.31 | 1 | HC_vs_MS.Trt_F |
| ARL2BP    | 0.60209 | -0.4981 | 0.153 | 0.16 | 1 | HC_vs_MS.Trt_F |
| FAM65B    | 0.60221 | -0.4239 | 0.673 | 0.65 | 1 | HC_vs_MS.Trt_F |
| ZC3H8     | 0.60232 | -0.3235 | 0.818 | 0.78 | 1 | HC_vs_MS.Trt_F |
| GNS       | 0.60248 | 0.34408 | 0.775 | 0.8  | 1 | HC_vs_MS.Trt_F |
| PYM1      | 0.60255 | -0.5782 | 0.231 | 0.23 | 1 | HC_vs_MS.Trt_F |
| FAM185A   | 0.60325 | 0.35321 | 0.113 | 0.13 | 1 | HC_vs_MS.Trt_F |
| SNX14     | 0.60354 | -0.4326 | 0.59  | 0.52 | 1 | HC_vs_MS.Trt_F |
| PEX11A    | 0.60395 | -0.3166 | 0.578 | 0.57 | 1 | HC_vs_MS.Trt_F |
| BACE1     | 0.60403 | -0.594  | 0.613 | 0.54 | 1 | HC_vs_MS.Trt_F |
| SYT11     | 0.60404 | -0.3228 | 0.705 | 0.6  | 1 | HC_vs_MS.Trt_F |
| C1orf162  | 0.60407 | 0.37395 | 0.142 | 0.13 | 1 | HC_vs_MS.Trt_F |
| DENND5A   | 0.60445 | 0.48527 | 0.275 | 0.26 | 1 | HC_vs_MS.Trt_F |

|            |         |         |       |      |   |                |
|------------|---------|---------|-------|------|---|----------------|
| TIGD6      | 0.60452 | 0.86099 | 0.246 | 0.23 | 1 | HC_vs_MS.Trt_F |
| CNNM3      | 0.60517 | 0.27327 | 0.645 | 0.6  | 1 | HC_vs_MS.Trt_F |
| NEDD1      | 0.60572 | -0.292  | 0.15  | 0.16 | 1 | HC_vs_MS.Trt_F |
| ZNF721     | 0.60595 | -0.6804 | 0.376 | 0.37 | 1 | HC_vs_MS.Trt_F |
| MCM9       | 0.606   | -0.9695 | 0.341 | 0.35 | 1 | HC_vs_MS.Trt_F |
| DLD        | 0.60609 | -0.4634 | 0.179 | 0.16 | 1 | HC_vs_MS.Trt_F |
| CMC1       | 0.60659 | -0.3231 | 0.217 | 0.19 | 1 | HC_vs_MS.Trt_F |
| C12orf43   | 0.60674 | 0.43805 | 0.922 | 0.9  | 1 | HC_vs_MS.Trt_F |
| PTAFR      | 0.60678 | 0.48011 | 0.642 | 0.64 | 1 | HC_vs_MS.Trt_F |
| ZNF23      | 0.6073  | 0.56991 | 0.396 | 0.37 | 1 | HC_vs_MS.Trt_F |
| ZNF45      | 0.60744 | -0.5191 | 0.344 | 0.32 | 1 | HC_vs_MS.Trt_F |
| MRPL24     | 0.60824 | -0.2833 | 0.145 | 0.13 | 1 | HC_vs_MS.Trt_F |
| PUM2       | 0.60882 | -0.2769 | 0.338 | 0.35 | 1 | HC_vs_MS.Trt_F |
| ISY1       | 0.60931 | -0.3696 | 0.624 | 0.6  | 1 | HC_vs_MS.Trt_F |
| PIH1D1     | 0.60945 | 0.25207 | 0.338 | 0.31 | 1 | HC_vs_MS.Trt_F |
| BTN3A2     | 0.60956 | -0.3548 | 0.76  | 0.7  | 1 | HC_vs_MS.Trt_F |
| PAWR       | 0.61043 | 0.25745 | 0.72  | 0.72 | 1 | HC_vs_MS.Trt_F |
| NOP10      | 0.61071 | -0.6447 | 0.228 | 0.23 | 1 | HC_vs_MS.Trt_F |
| ARMC2      | 0.61098 | 0.48938 | 0.11  | 0.1  | 1 | HC_vs_MS.Trt_F |
| SLC25A25   | 0.61157 | -0.6285 | 0.121 | 0.11 | 1 | HC_vs_MS.Trt_F |
| TMEM217    | 0.61184 | 0.70895 | 0.113 | 0.1  | 1 | HC_vs_MS.Trt_F |
| IP6K1      | 0.61297 | -0.5598 | 0.171 | 0.15 | 1 | HC_vs_MS.Trt_F |
| FAM78A     | 0.61311 | 0.7045  | 0.364 | 0.34 | 1 | HC_vs_MS.Trt_F |
| HCST       | 0.61342 | -0.3106 | 0.434 | 0.37 | 1 | HC_vs_MS.Trt_F |
| CREB1      | 0.61342 | -0.4564 | 0.665 | 0.63 | 1 | HC_vs_MS.Trt_F |
| CHRAC1     | 0.61437 | 0.5555  | 0.506 | 0.51 | 1 | HC_vs_MS.Trt_F |
| GSTT1      | 0.61448 | -0.3304 | 0.74  | 0.69 | 1 | HC_vs_MS.Trt_F |
| RAB28      | 0.61493 | 0.47821 | 0.136 | 0.12 | 1 | HC_vs_MS.Trt_F |
| RAB3D      | 0.61536 | -0.5026 | 0.673 | 0.58 | 1 | HC_vs_MS.Trt_F |
| ZNF610     | 0.61544 | -0.4684 | 0.445 | 0.47 | 1 | HC_vs_MS.Trt_F |
| FAM208A    | 0.61599 | -0.5822 | 0.711 | 0.74 | 1 | HC_vs_MS.Trt_F |
| CDC123     | 0.61643 | -0.3071 | 0.228 | 0.21 | 1 | HC_vs_MS.Trt_F |
| DBR1       | 0.61663 | -0.2578 | 0.786 | 0.79 | 1 | HC_vs_MS.Trt_F |
| ABCA6      | 0.61691 | 0.27885 | 0.685 | 0.69 | 1 | HC_vs_MS.Trt_F |
| HEXDC      | 0.6172  | -0.646  | 0.405 | 0.37 | 1 | HC_vs_MS.Trt_F |
| TRMT2A     | 0.61736 | -0.3677 | 0.185 | 0.16 | 1 | HC_vs_MS.Trt_F |
| QSER1      | 0.61746 | -1.107  | 0.11  | 0.1  | 1 | HC_vs_MS.Trt_F |
| RP11-277P1 | 0.61811 | 0.38943 | 0.09  | 0.1  | 1 | HC_vs_MS.Trt_F |
| PPARGC1B   | 0.61815 | -0.3881 | 0.763 | 0.73 | 1 | HC_vs_MS.Trt_F |
| LRMP       | 0.61824 | -0.3444 | 0.113 | 0.12 | 1 | HC_vs_MS.Trt_F |

|             |         |         |       |      |   |                |
|-------------|---------|---------|-------|------|---|----------------|
| KLHL26      | 0.61834 | 0.29864 | 0.552 | 0.56 | 1 | HC_vs_MS.Trt_F |
| ZHX1        | 0.61838 | -0.8404 | 0.598 | 0.57 | 1 | HC_vs_MS.Trt_F |
| ZNF181      | 0.61857 | -0.9635 | 0.194 | 0.17 | 1 | HC_vs_MS.Trt_F |
| EIF4E3      | 0.6187  | -0.8176 | 0.176 | 0.16 | 1 | HC_vs_MS.Trt_F |
| ZDHHC6      | 0.61872 | -0.6646 | 0.188 | 0.17 | 1 | HC_vs_MS.Trt_F |
| AK9         | 0.61929 | -0.6282 | 0.76  | 0.66 | 1 | HC_vs_MS.Trt_F |
| CCNT2       | 0.61999 | -0.4672 | 0.179 | 0.16 | 1 | HC_vs_MS.Trt_F |
| CTD-2192J10 | 0.62014 | 0.33607 | 0.512 | 0.48 | 1 | HC_vs_MS.Trt_F |
| SLC6A6      | 0.62017 | -0.4297 | 0.217 | 0.19 | 1 | HC_vs_MS.Trt_F |
| 7-Sep       | 0.62053 | -0.3499 | 0.751 | 0.68 | 1 | HC_vs_MS.Trt_F |
| KLHL28      | 0.62094 | -0.3761 | 0.382 | 0.39 | 1 | HC_vs_MS.Trt_F |
| RRM2B       | 0.6211  | 0.38219 | 0.182 | 0.17 | 1 | HC_vs_MS.Trt_F |
| SKA2        | 0.62148 | -0.6074 | 0.601 | 0.59 | 1 | HC_vs_MS.Trt_F |
| MOB1A       | 0.62175 | -0.4118 | 0.85  | 0.82 | 1 | HC_vs_MS.Trt_F |
| COX5B       | 0.6223  | -0.5669 | 0.832 | 0.79 | 1 | HC_vs_MS.Trt_F |
| CMC2        | 0.62256 | -0.5278 | 0.876 | 0.88 | 1 | HC_vs_MS.Trt_F |
| BOLA2B      | 0.62259 | -0.3764 | 0.147 | 0.16 | 1 | HC_vs_MS.Trt_F |
| PDP2        | 0.62355 | 0.35929 | 0.835 | 0.8  | 1 | HC_vs_MS.Trt_F |
| CGGBP1      | 0.62376 | -0.7894 | 0.228 | 0.21 | 1 | HC_vs_MS.Trt_F |
| RPL24       | 0.62377 | -0.2908 | 0.777 | 0.75 | 1 | HC_vs_MS.Trt_F |
| SLC52A1     | 0.6239  | -0.2904 | 0.792 | 0.76 | 1 | HC_vs_MS.Trt_F |
| ZNF8        | 0.62427 | -0.3588 | 0.96  | 0.97 | 1 | HC_vs_MS.Trt_F |
| SCOC        | 0.62433 | -0.3325 | 0.127 | 0.11 | 1 | HC_vs_MS.Trt_F |
| DBNDD1      | 0.62489 | 0.90115 | 0.182 | 0.19 | 1 | HC_vs_MS.Trt_F |
| SSSCA1      | 0.62496 | -0.3492 | 0.11  | 0.1  | 1 | HC_vs_MS.Trt_F |
| SSRP1       | 0.62523 | -0.3784 | 0.171 | 0.15 | 1 | HC_vs_MS.Trt_F |
| ANK1        | 0.62545 | -1.3238 | 0.217 | 0.23 | 1 | HC_vs_MS.Trt_F |
| S100B       | 0.62569 | 0.64274 | 0.153 | 0.14 | 1 | HC_vs_MS.Trt_F |
| PLEKHG4     | 0.62571 | -0.4857 | 0.197 | 0.21 | 1 | HC_vs_MS.Trt_F |
| SDHA        | 0.62579 | -0.3094 | 0.581 | 0.57 | 1 | HC_vs_MS.Trt_F |
| AARS2       | 0.62579 | -0.4495 | 0.457 | 0.42 | 1 | HC_vs_MS.Trt_F |
| TG          | 0.62582 | 0.89558 | 0.098 | 0.11 | 1 | HC_vs_MS.Trt_F |
| PWWP2A      | 0.62615 | -0.782  | 0.139 | 0.15 | 1 | HC_vs_MS.Trt_F |
| LYPLA1      | 0.62649 | -0.3143 | 0.561 | 0.52 | 1 | HC_vs_MS.Trt_F |
| PLBD1       | 0.62668 | 0.38677 | 0.5   | 0.48 | 1 | HC_vs_MS.Trt_F |
| ZSCAN22     | 0.62672 | -0.3357 | 0.48  | 0.49 | 1 | HC_vs_MS.Trt_F |
| APC2        | 0.62679 | 0.44389 | 0.104 | 0.12 | 1 | HC_vs_MS.Trt_F |
| LNPBK       | 0.6271  | -0.527  | 0.558 | 0.55 | 1 | HC_vs_MS.Trt_F |
| LPAR4       | 0.62715 | 0.34461 | 0.185 | 0.17 | 1 | HC_vs_MS.Trt_F |
| LEF1        | 0.62806 | -0.3082 | 0.379 | 0.38 | 1 | HC_vs_MS.Trt_F |



|          |         |         |       |      |   |                |
|----------|---------|---------|-------|------|---|----------------|
| HIST1H1D | 0.62854 | 0.27744 | 0.095 | 0.1  | 1 | HC_vs_MS.Trt_F |
| FBRSL1   | 0.62917 | -0.2804 | 0.113 | 0.1  | 1 | HC_vs_MS.Trt_F |
| ACAA1    | 0.62924 | -0.4734 | 0.52  | 0.48 | 1 | HC_vs_MS.Trt_F |
| EIF3E    | 0.62962 | -0.3978 | 0.538 | 0.46 | 1 | HC_vs_MS.Trt_F |
| HIP1R    | 0.62973 | 0.89163 | 0.11  | 0.1  | 1 | HC_vs_MS.Trt_F |
| ZIK1     | 0.63009 | -1.2156 | 0.327 | 0.34 | 1 | HC_vs_MS.Trt_F |
| ZNF880   | 0.63019 | -0.6925 | 0.512 | 0.5  | 1 | HC_vs_MS.Trt_F |
| PLA2G6   | 0.63041 | 0.94369 | 0.428 | 0.43 | 1 | HC_vs_MS.Trt_F |
| MAPKAPK2 | 0.63093 | 0.81875 | 0.104 | 0.09 | 1 | HC_vs_MS.Trt_F |
| COX7A2   | 0.63113 | -0.4421 | 0.728 | 0.71 | 1 | HC_vs_MS.Trt_F |
| RAB35    | 0.63126 | 0.30352 | 0.168 | 0.15 | 1 | HC_vs_MS.Trt_F |
| TMEM115  | 0.63173 | -0.6683 | 0.107 | 0.12 | 1 | HC_vs_MS.Trt_F |
| CNOT11   | 0.63213 | 0.30429 | 0.133 | 0.12 | 1 | HC_vs_MS.Trt_F |
| FAM114A2 | 0.63245 | -0.4454 | 0.098 | 0.11 | 1 | HC_vs_MS.Trt_F |
| C6orf89  | 0.63312 | 0.3244  | 0.431 | 0.46 | 1 | HC_vs_MS.Trt_F |
| IFNLR1   | 0.63319 | 0.72661 | 0.13  | 0.14 | 1 | HC_vs_MS.Trt_F |
| TMEM136  | 0.63332 | -0.9385 | 0.512 | 0.54 | 1 | HC_vs_MS.Trt_F |
| SBDS     | 0.63375 | -0.2842 | 0.309 | 0.28 | 1 | HC_vs_MS.Trt_F |
| EPHA4    | 0.63384 | -0.78   | 0.237 | 0.21 | 1 | HC_vs_MS.Trt_F |
| PIKFYVE  | 0.63415 | 0.48702 | 0.41  | 0.4  | 1 | HC_vs_MS.Trt_F |
| GPN3     | 0.63441 | 0.99602 | 0.379 | 0.36 | 1 | HC_vs_MS.Trt_F |
| BSPRY    | 0.63448 | 0.59969 | 0.11  | 0.1  | 1 | HC_vs_MS.Trt_F |
| ZC3H7A   | 0.6345  | -0.6947 | 0.416 | 0.37 | 1 | HC_vs_MS.Trt_F |
| SMARCAL1 | 0.63516 | -0.3393 | 0.743 | 0.69 | 1 | HC_vs_MS.Trt_F |
| SAV1     | 0.63516 | -0.5561 | 0.329 | 0.34 | 1 | HC_vs_MS.Trt_F |
| PRPF6    | 0.63565 | -0.3217 | 0.231 | 0.21 | 1 | HC_vs_MS.Trt_F |
| PANK1    | 0.63584 | 0.43166 | 0.497 | 0.45 | 1 | HC_vs_MS.Trt_F |
| PNP      | 0.63596 | 0.25771 | 0.416 | 0.39 | 1 | HC_vs_MS.Trt_F |
| DKC1     | 0.6362  | -0.294  | 0.373 | 0.39 | 1 | HC_vs_MS.Trt_F |
| RABL2B   | 0.63659 | 0.43836 | 0.916 | 0.9  | 1 | HC_vs_MS.Trt_F |
| FAM227B  | 0.63694 | -0.5517 | 0.384 | 0.39 | 1 | HC_vs_MS.Trt_F |
| MEAF6    | 0.63709 | -0.3337 | 0.277 | 0.25 | 1 | HC_vs_MS.Trt_F |
| TIGAR    | 0.63713 | -0.5051 | 0.905 | 0.9  | 1 | HC_vs_MS.Trt_F |
| DDIAS    | 0.63718 | 0.35118 | 0.46  | 0.47 | 1 | HC_vs_MS.Trt_F |
| COG2     | 0.63746 | -0.3736 | 0.37  | 0.35 | 1 | HC_vs_MS.Trt_F |
| ZNF761   | 0.63768 | -1.1535 | 0.737 | 0.73 | 1 | HC_vs_MS.Trt_F |
| RPRD1A   | 0.6379  | -0.4358 | 0.179 | 0.16 | 1 | HC_vs_MS.Trt_F |
| PPP5D1   | 0.63802 | -0.3714 | 0.783 | 0.75 | 1 | HC_vs_MS.Trt_F |
| PDE6D    | 0.63838 | -0.8824 | 0.147 | 0.16 | 1 | HC_vs_MS.Trt_F |
| RBX1     | 0.6385  | -0.9117 | 0.309 | 0.26 | 1 | HC_vs_MS.Trt_F |

|            |         |         |       |      |   |                |
|------------|---------|---------|-------|------|---|----------------|
| COIL       | 0.63871 | -0.6258 | 0.142 | 0.15 | 1 | HC_vs_MS.Trt_F |
| EID2B      | 0.63877 | 0.46724 | 0.523 | 0.51 | 1 | HC_vs_MS.Trt_F |
| NAA38      | 0.63966 | -0.4374 | 0.147 | 0.13 | 1 | HC_vs_MS.Trt_F |
| PLAT       | 0.64033 | -0.468  | 0.104 | 0.12 | 1 | HC_vs_MS.Trt_F |
| PLXDC1     | 0.64045 | -0.5905 | 0.731 | 0.69 | 1 | HC_vs_MS.Trt_F |
| ZMYM4      | 0.64056 | 0.77433 | 0.165 | 0.15 | 1 | HC_vs_MS.Trt_F |
| SCO1       | 0.64086 | -0.2733 | 0.85  | 0.79 | 1 | HC_vs_MS.Trt_F |
| ZNF808     | 0.64093 | -0.9814 | 0.526 | 0.54 | 1 | HC_vs_MS.Trt_F |
| PBX4       | 0.64105 | -0.4793 | 0.197 | 0.18 | 1 | HC_vs_MS.Trt_F |
| CTIF       | 0.64118 | -0.8483 | 0.234 | 0.25 | 1 | HC_vs_MS.Trt_F |
| STXBP5     | 0.64174 | -0.4439 | 0.197 | 0.18 | 1 | HC_vs_MS.Trt_F |
| FLII       | 0.64197 | -0.451  | 0.249 | 0.22 | 1 | HC_vs_MS.Trt_F |
| MTRF1      | 0.64231 | -0.2867 | 0.598 | 0.57 | 1 | HC_vs_MS.Trt_F |
| IL17RC     | 0.64239 | 1.15471 | 0.439 | 0.43 | 1 | HC_vs_MS.Trt_F |
| TMPRSS11B  | 0.64323 | -0.5077 | 0.373 | 0.37 | 1 | HC_vs_MS.Trt_F |
| CRB1       | 0.64351 | -0.4477 | 0.176 | 0.16 | 1 | HC_vs_MS.Trt_F |
| G6PD       | 0.64372 | -0.4645 | 0.107 | 0.12 | 1 | HC_vs_MS.Trt_F |
| ADHFE1     | 0.64378 | -0.4328 | 0.179 | 0.16 | 1 | HC_vs_MS.Trt_F |
| CNST       | 0.64388 | -0.4542 | 0.303 | 0.27 | 1 | HC_vs_MS.Trt_F |
| TMEM160    | 0.64407 | -0.3411 | 0.173 | 0.16 | 1 | HC_vs_MS.Trt_F |
| PMS2       | 0.64413 | 0.46911 | 0.685 | 0.62 | 1 | HC_vs_MS.Trt_F |
| MFSD13A    | 0.64419 | -0.3846 | 0.777 | 0.75 | 1 | HC_vs_MS.Trt_F |
| HEATR4     | 0.64434 | -0.5057 | 0.413 | 0.4  | 1 | HC_vs_MS.Trt_F |
| MEGF6      | 0.64466 | -0.3412 | 0.162 | 0.14 | 1 | HC_vs_MS.Trt_F |
| NOD1       | 0.64533 | -0.2533 | 0.13  | 0.12 | 1 | HC_vs_MS.Trt_F |
| PRMT1      | 0.64576 | 0.26816 | 0.832 | 0.81 | 1 | HC_vs_MS.Trt_F |
| SPG7       | 0.64607 | -0.3906 | 0.986 | 0.96 | 1 | HC_vs_MS.Trt_F |
| CTD-2370NE | 0.64625 | -0.2816 | 0.156 | 0.17 | 1 | HC_vs_MS.Trt_F |
| SULT1A1    | 0.6463  | 0.5273  | 0.618 | 0.57 | 1 | HC_vs_MS.Trt_F |
| ZNF749     | 0.64729 | -0.5864 | 0.457 | 0.46 | 1 | HC_vs_MS.Trt_F |
| SIRT1      | 0.64731 | -0.7997 | 0.153 | 0.14 | 1 | HC_vs_MS.Trt_F |
| MYO5C      | 0.64742 | -0.8394 | 0.428 | 0.39 | 1 | HC_vs_MS.Trt_F |
| SH3GLB2    | 0.64785 | -0.3771 | 0.145 | 0.16 | 1 | HC_vs_MS.Trt_F |
| NPTN       | 0.64786 | -0.4729 | 0.338 | 0.3  | 1 | HC_vs_MS.Trt_F |
| AKAP10     | 0.64806 | -0.5759 | 0.538 | 0.47 | 1 | HC_vs_MS.Trt_F |
| YPEL2      | 0.64906 | -0.3576 | 0.214 | 0.19 | 1 | HC_vs_MS.Trt_F |
| IDUA       | 0.6498  | 0.26237 | 0.107 | 0.1  | 1 | HC_vs_MS.Trt_F |
| POLA2      | 0.65009 | -0.6296 | 0.662 | 0.66 | 1 | HC_vs_MS.Trt_F |
| ZNF763     | 0.65012 | -1.2508 | 0.202 | 0.18 | 1 | HC_vs_MS.Trt_F |
| MIOS       | 0.65106 | 0.60599 | 0.306 | 0.29 | 1 | HC_vs_MS.Trt_F |

|          |         |         |       |      |   |                |
|----------|---------|---------|-------|------|---|----------------|
| KMT5A    | 0.65158 | -0.4388 | 0.28  | 0.25 | 1 | HC_vs_MS.Trt_F |
| OSBPL2   | 0.65206 | 0.31369 | 0.523 | 0.49 | 1 | HC_vs_MS.Trt_F |
| PLGRKT   | 0.65207 | -0.8001 | 0.101 | 0.11 | 1 | HC_vs_MS.Trt_F |
| ZNF626   | 0.65219 | 0.40513 | 0.783 | 0.76 | 1 | HC_vs_MS.Trt_F |
| AP1S2    | 0.65242 | -0.4742 | 0.228 | 0.2  | 1 | HC_vs_MS.Trt_F |
| MED21    | 0.65263 | -0.4402 | 0.156 | 0.14 | 1 | HC_vs_MS.Trt_F |
| ZNF24    | 0.65276 | -0.4398 | 0.199 | 0.18 | 1 | HC_vs_MS.Trt_F |
| YIPF1    | 0.65294 | -0.3625 | 0.124 | 0.11 | 1 | HC_vs_MS.Trt_F |
| PTDSS1   | 0.65352 | -0.2747 | 0.419 | 0.38 | 1 | HC_vs_MS.Trt_F |
| TRIM11   | 0.65385 | -0.4747 | 0.604 | 0.55 | 1 | HC_vs_MS.Trt_F |
| COX16    | 0.6539  | -0.5571 | 0.552 | 0.56 | 1 | HC_vs_MS.Trt_F |
| PGBD2    | 0.65405 | -0.9261 | 0.373 | 0.33 | 1 | HC_vs_MS.Trt_F |
| PYCR1    | 0.65411 | 0.81699 | 0.465 | 0.44 | 1 | HC_vs_MS.Trt_F |
| GARS     | 0.65442 | -0.8379 | 0.214 | 0.19 | 1 | HC_vs_MS.Trt_F |
| SEC24D   | 0.65508 | -0.7592 | 0.526 | 0.52 | 1 | HC_vs_MS.Trt_F |
| N6AMT1   | 0.65509 | -0.629  | 0.159 | 0.17 | 1 | HC_vs_MS.Trt_F |
| LAMA5    | 0.65526 | -1.0728 | 0.306 | 0.28 | 1 | HC_vs_MS.Trt_F |
| PARN     | 0.65527 | -0.6326 | 0.746 | 0.76 | 1 | HC_vs_MS.Trt_F |
| CCZ1     | 0.65572 | 0.47092 | 0.72  | 0.67 | 1 | HC_vs_MS.Trt_F |
| RAB2A    | 0.65687 | -0.2526 | 0.251 | 0.23 | 1 | HC_vs_MS.Trt_F |
| DCST1    | 0.65694 | -0.6101 | 0.145 | 0.16 | 1 | HC_vs_MS.Trt_F |
| RNF126   | 0.65712 | -0.4399 | 0.22  | 0.23 | 1 | HC_vs_MS.Trt_F |
| TGM2     | 0.65761 | -0.3365 | 0.613 | 0.61 | 1 | HC_vs_MS.Trt_F |
| HILPDA   | 0.65826 | 0.40868 | 0.592 | 0.57 | 1 | HC_vs_MS.Trt_F |
| PIGK     | 0.65883 | -0.6735 | 0.136 | 0.14 | 1 | HC_vs_MS.Trt_F |
| PDIA5    | 0.65926 | 0.43961 | 0.434 | 0.41 | 1 | HC_vs_MS.Trt_F |
| ZFAND1   | 0.66022 | -0.7908 | 0.156 | 0.14 | 1 | HC_vs_MS.Trt_F |
| USE1     | 0.6612  | -0.2944 | 0.887 | 0.92 | 1 | HC_vs_MS.Trt_F |
| GCLC     | 0.66182 | 0.79    | 0.601 | 0.57 | 1 | HC_vs_MS.Trt_F |
| IFI44L   | 0.66245 | -1.0445 | 0.228 | 0.21 | 1 | HC_vs_MS.Trt_F |
| FAM179A  | 0.663   | -0.3258 | 0.838 | 0.85 | 1 | HC_vs_MS.Trt_F |
| DNASE2   | 0.66433 | -0.4839 | 0.48  | 0.45 | 1 | HC_vs_MS.Trt_F |
| ENTPD7   | 0.66482 | 1.43552 | 0.384 | 0.35 | 1 | HC_vs_MS.Trt_F |
| FNIP2    | 0.66503 | 0.37638 | 0.35  | 0.32 | 1 | HC_vs_MS.Trt_F |
| COPG1    | 0.66572 | -0.5987 | 0.173 | 0.18 | 1 | HC_vs_MS.Trt_F |
| CCT8     | 0.66584 | -0.3741 | 0.283 | 0.26 | 1 | HC_vs_MS.Trt_F |
| TMEM184B | 0.66603 | 0.40771 | 0.101 | 0.09 | 1 | HC_vs_MS.Trt_F |
| TOPBP1   | 0.66604 | 1.16695 | 0.133 | 0.12 | 1 | HC_vs_MS.Trt_F |
| KATNB1   | 0.66637 | -0.3063 | 0.098 | 0.11 | 1 | HC_vs_MS.Trt_F |
| CYB561D2 | 0.66638 | -0.3345 | 0.136 | 0.12 | 1 | HC_vs_MS.Trt_F |

|            |         |         |       |      |   |                |
|------------|---------|---------|-------|------|---|----------------|
| GABPB2     | 0.66793 | -0.2656 | 0.977 | 0.98 | 1 | HC_vs_MS.Trt_F |
| FXR1       | 0.66928 | -0.4019 | 0.225 | 0.21 | 1 | HC_vs_MS.Trt_F |
| ITPKB      | 0.66945 | -0.2616 | 0.63  | 0.6  | 1 | HC_vs_MS.Trt_F |
| TCF20      | 0.66975 | 0.47045 | 0.156 | 0.14 | 1 | HC_vs_MS.Trt_F |
| ARPC4-TTL1 | 0.66986 | -1.0463 | 0.118 | 0.13 | 1 | HC_vs_MS.Trt_F |
| PCNP       | 0.66996 | -0.5413 | 0.269 | 0.24 | 1 | HC_vs_MS.Trt_F |
| CUL4B      | 0.67001 | -0.7151 | 0.145 | 0.13 | 1 | HC_vs_MS.Trt_F |
| C1QBP      | 0.67012 | -0.35   | 0.301 | 0.27 | 1 | HC_vs_MS.Trt_F |
| B3GALNT2   | 0.6705  | 0.60253 | 0.668 | 0.63 | 1 | HC_vs_MS.Trt_F |
| MFN1       | 0.67197 | -0.6092 | 0.506 | 0.46 | 1 | HC_vs_MS.Trt_F |
| NCOA6      | 0.67202 | 0.26809 | 0.728 | 0.71 | 1 | HC_vs_MS.Trt_F |
| CA5B       | 0.67278 | 0.277   | 0.879 | 0.84 | 1 | HC_vs_MS.Trt_F |
| COA7       | 0.6729  | 0.70183 | 0.893 | 0.91 | 1 | HC_vs_MS.Trt_F |
| KANK1      | 0.67305 | -0.6136 | 0.78  | 0.73 | 1 | HC_vs_MS.Trt_F |
| PELP1      | 0.67318 | 1.03204 | 0.277 | 0.26 | 1 | HC_vs_MS.Trt_F |
| TMEM9B     | 0.67327 | -0.586  | 0.228 | 0.21 | 1 | HC_vs_MS.Trt_F |
| FAM184B    | 0.67344 | 0.35085 | 0.142 | 0.16 | 1 | HC_vs_MS.Trt_F |
| PPP2R5A    | 0.67354 | -1.0627 | 0.237 | 0.21 | 1 | HC_vs_MS.Trt_F |
| C3orf62    | 0.67391 | 0.48917 | 0.801 | 0.77 | 1 | HC_vs_MS.Trt_F |
| NFE2L1     | 0.67398 | 0.67645 | 0.101 | 0.11 | 1 | HC_vs_MS.Trt_F |
| EIF2B2     | 0.67419 | -0.466  | 0.616 | 0.54 | 1 | HC_vs_MS.Trt_F |
| TCTN3      | 0.67422 | -0.2771 | 0.133 | 0.12 | 1 | HC_vs_MS.Trt_F |
| C9orf72    | 0.67484 | -0.735  | 0.162 | 0.17 | 1 | HC_vs_MS.Trt_F |
| ATP5I      | 0.67556 | -0.5346 | 0.283 | 0.26 | 1 | HC_vs_MS.Trt_F |
| CD180      | 0.67561 | -0.74   | 0.315 | 0.3  | 1 | HC_vs_MS.Trt_F |
| RDH11      | 0.67567 | -0.5188 | 0.558 | 0.5  | 1 | HC_vs_MS.Trt_F |
| C18orf8    | 0.67592 | 0.32193 | 0.353 | 0.34 | 1 | HC_vs_MS.Trt_F |
| PER2       | 0.67624 | -0.8882 | 0.54  | 0.51 | 1 | HC_vs_MS.Trt_F |
| PGGT1B     | 0.67646 | -0.5487 | 0.202 | 0.18 | 1 | HC_vs_MS.Trt_F |
| EDEM3      | 0.67649 | -0.6213 | 0.309 | 0.28 | 1 | HC_vs_MS.Trt_F |
| MRI1       | 0.677   | -0.2826 | 0.749 | 0.72 | 1 | HC_vs_MS.Trt_F |
| ADIPOR1    | 0.67742 | -0.4316 | 0.289 | 0.27 | 1 | HC_vs_MS.Trt_F |
| STAU2      | 0.67803 | -0.2519 | 0.656 | 0.67 | 1 | HC_vs_MS.Trt_F |
| PPIE       | 0.6781  | -0.4069 | 0.789 | 0.78 | 1 | HC_vs_MS.Trt_F |
| TSR2       | 0.6782  | -0.6458 | 0.46  | 0.45 | 1 | HC_vs_MS.Trt_F |
| SLC35E4    | 0.67823 | 0.94026 | 0.361 | 0.35 | 1 | HC_vs_MS.Trt_F |
| STRIP1     | 0.67868 | -0.5033 | 0.179 | 0.18 | 1 | HC_vs_MS.Trt_F |
| AP3D1      | 0.67922 | 0.32874 | 0.168 | 0.16 | 1 | HC_vs_MS.Trt_F |
| FAM213B    | 0.67957 | -0.3706 | 0.116 | 0.12 | 1 | HC_vs_MS.Trt_F |
| MED22      | 0.68061 | 0.44091 | 0.613 | 0.63 | 1 | HC_vs_MS.Trt_F |

|          |         |         |       |      |   |                |
|----------|---------|---------|-------|------|---|----------------|
| DYNC1LI1 | 0.68094 | -0.5304 | 0.46  | 0.48 | 1 | HC_vs_MS.Trt_F |
| CAMK4    | 0.68113 | 0.32564 | 0.578 | 0.59 | 1 | HC_vs_MS.Trt_F |
| PANK2    | 0.68115 | -0.5656 | 0.575 | 0.52 | 1 | HC_vs_MS.Trt_F |
| NCBP2    | 0.68151 | -0.3361 | 0.286 | 0.26 | 1 | HC_vs_MS.Trt_F |
| KLHDC1   | 0.6816  | 0.63608 | 0.332 | 0.31 | 1 | HC_vs_MS.Trt_F |
| SNX29    | 0.68161 | 0.60027 | 0.806 | 0.78 | 1 | HC_vs_MS.Trt_F |
| TRPM3    | 0.68172 | 0.25801 | 0.503 | 0.47 | 1 | HC_vs_MS.Trt_F |
| PCDHB16  | 0.68194 | 0.6498  | 0.358 | 0.35 | 1 | HC_vs_MS.Trt_F |
| HACE1    | 0.68198 | -0.299  | 0.688 | 0.64 | 1 | HC_vs_MS.Trt_F |
| ACBD5    | 0.68214 | 0.36303 | 0.514 | 0.5  | 1 | HC_vs_MS.Trt_F |
| ADSSL1   | 0.68297 | -0.2737 | 0.347 | 0.32 | 1 | HC_vs_MS.Trt_F |
| PLEKHA7  | 0.68303 | -0.5452 | 0.266 | 0.25 | 1 | HC_vs_MS.Trt_F |
| FUZ      | 0.68329 | 0.6857  | 0.286 | 0.28 | 1 | HC_vs_MS.Trt_F |
| SCP2     | 0.68346 | -0.4825 | 0.306 | 0.28 | 1 | HC_vs_MS.Trt_F |
| ACSM3    | 0.68382 | 0.41568 | 0.679 | 0.61 | 1 | HC_vs_MS.Trt_F |
| STX18    | 0.68422 | -0.6062 | 0.159 | 0.14 | 1 | HC_vs_MS.Trt_F |
| TNFSF14  | 0.68474 | 0.27643 | 0.694 | 0.69 | 1 | HC_vs_MS.Trt_F |
| GOLGA1   | 0.68481 | -1.0314 | 0.127 | 0.13 | 1 | HC_vs_MS.Trt_F |
| GMCL1    | 0.68518 | -1.0767 | 0.384 | 0.36 | 1 | HC_vs_MS.Trt_F |
| ENOX2    | 0.68555 | -0.4038 | 0.145 | 0.13 | 1 | HC_vs_MS.Trt_F |
| TCEAL3   | 0.6858  | -0.3846 | 0.15  | 0.13 | 1 | HC_vs_MS.Trt_F |
| RPP38    | 0.68647 | -0.2828 | 0.465 | 0.43 | 1 | HC_vs_MS.Trt_F |
| NF2      | 0.68688 | -0.7368 | 0.821 | 0.77 | 1 | HC_vs_MS.Trt_F |
| ZNF527   | 0.68724 | 0.35659 | 0.934 | 0.9  | 1 | HC_vs_MS.Trt_F |
| NRIP2    | 0.68734 | -0.9837 | 0.335 | 0.33 | 1 | HC_vs_MS.Trt_F |
| RELL2    | 0.68767 | -0.2895 | 0.104 | 0.11 | 1 | HC_vs_MS.Trt_F |
| TMEM14A  | 0.68767 | -0.4384 | 0.101 | 0.11 | 1 | HC_vs_MS.Trt_F |
| ZER1     | 0.68787 | -0.3784 | 0.145 | 0.15 | 1 | HC_vs_MS.Trt_F |
| WDR73    | 0.68787 | -0.3698 | 0.974 | 0.97 | 1 | HC_vs_MS.Trt_F |
| XKR8     | 0.68788 | -0.6299 | 0.185 | 0.19 | 1 | HC_vs_MS.Trt_F |
| HDHD2    | 0.6879  | -0.4105 | 0.147 | 0.16 | 1 | HC_vs_MS.Trt_F |
| EXOSC9   | 0.68795 | -0.6424 | 0.254 | 0.23 | 1 | HC_vs_MS.Trt_F |
| PQLC2    | 0.68838 | -0.6063 | 0.454 | 0.4  | 1 | HC_vs_MS.Trt_F |
| TIMM10   | 0.68859 | 0.26251 | 0.118 | 0.11 | 1 | HC_vs_MS.Trt_F |
| PSMD5    | 0.68876 | -0.2872 | 0.434 | 0.4  | 1 | HC_vs_MS.Trt_F |
| GRHPR    | 0.68899 | -0.6782 | 0.549 | 0.51 | 1 | HC_vs_MS.Trt_F |
| SIGLEC6  | 0.68903 | 0.66873 | 0.535 | 0.5  | 1 | HC_vs_MS.Trt_F |
| SCARB2   | 0.68949 | -0.3643 | 0.341 | 0.32 | 1 | HC_vs_MS.Trt_F |
| F2RL1    | 0.68974 | -1.5436 | 0.214 | 0.22 | 1 | HC_vs_MS.Trt_F |
| FAM135A  | 0.68998 | -0.6227 | 0.471 | 0.47 | 1 | HC_vs_MS.Trt_F |

|            |         |         |       |      |   |                |
|------------|---------|---------|-------|------|---|----------------|
| IRS1       | 0.69115 | 0.33889 | 0.107 | 0.12 | 1 | HC_vs_MS.Trt_F |
| CYLD       | 0.69144 | -0.2826 | 0.714 | 0.73 | 1 | HC_vs_MS.Trt_F |
| CD38       | 0.69158 | 0.62553 | 0.387 | 0.36 | 1 | HC_vs_MS.Trt_F |
| LINC00959  | 0.69161 | -0.7538 | 0.147 | 0.13 | 1 | HC_vs_MS.Trt_F |
| NF1        | 0.69176 | 0.38512 | 0.76  | 0.72 | 1 | HC_vs_MS.Trt_F |
| PON2       | 0.69181 | -0.7389 | 0.442 | 0.42 | 1 | HC_vs_MS.Trt_F |
| KLHL12     | 0.6919  | -0.2926 | 0.121 | 0.11 | 1 | HC_vs_MS.Trt_F |
| RCAN1      | 0.6919  | 0.43353 | 0.39  | 0.38 | 1 | HC_vs_MS.Trt_F |
| STRAP      | 0.69249 | -0.3304 | 0.298 | 0.31 | 1 | HC_vs_MS.Trt_F |
| DYRK2      | 0.69312 | -0.4632 | 0.173 | 0.16 | 1 | HC_vs_MS.Trt_F |
| CROCC      | 0.6934  | -0.3528 | 0.552 | 0.55 | 1 | HC_vs_MS.Trt_F |
| UBE2D2     | 0.69378 | -0.5045 | 0.41  | 0.39 | 1 | HC_vs_MS.Trt_F |
| PHTF1      | 0.69436 | -0.5669 | 0.569 | 0.54 | 1 | HC_vs_MS.Trt_F |
| TMCO6      | 0.69438 | -0.474  | 0.526 | 0.5  | 1 | HC_vs_MS.Trt_F |
| APC        | 0.69455 | 0.46411 | 0.538 | 0.52 | 1 | HC_vs_MS.Trt_F |
| ZNF682     | 0.69461 | 0.86088 | 0.405 | 0.4  | 1 | HC_vs_MS.Trt_F |
| ZNF441     | 0.69462 | -1.3644 | 0.197 | 0.21 | 1 | HC_vs_MS.Trt_F |
| LARS2      | 0.69469 | 0.38719 | 0.546 | 0.54 | 1 | HC_vs_MS.Trt_F |
| USP6       | 0.69493 | 0.43814 | 0.139 | 0.15 | 1 | HC_vs_MS.Trt_F |
| TRIQK      | 0.695   | -0.4123 | 0.558 | 0.55 | 1 | HC_vs_MS.Trt_F |
| SELM       | 0.69514 | -0.3256 | 0.277 | 0.28 | 1 | HC_vs_MS.Trt_F |
| RUNDC1     | 0.69525 | -0.3337 | 0.775 | 0.75 | 1 | HC_vs_MS.Trt_F |
| BMPR1B     | 0.69543 | 0.39911 | 0.176 | 0.17 | 1 | HC_vs_MS.Trt_F |
| PTGER2     | 0.6956  | -0.6358 | 0.217 | 0.22 | 1 | HC_vs_MS.Trt_F |
| PTRH1      | 0.69575 | -0.3882 | 0.777 | 0.71 | 1 | HC_vs_MS.Trt_F |
| GALNT10    | 0.69582 | 0.60547 | 0.578 | 0.55 | 1 | HC_vs_MS.Trt_F |
| VLDLR      | 0.69582 | -1.4845 | 0.488 | 0.45 | 1 | HC_vs_MS.Trt_F |
| NCAPD2     | 0.69612 | -0.7319 | 0.454 | 0.45 | 1 | HC_vs_MS.Trt_F |
| TMEM5      | 0.69618 | -0.3335 | 0.523 | 0.5  | 1 | HC_vs_MS.Trt_F |
| HINT3      | 0.69632 | -0.3497 | 0.303 | 0.31 | 1 | HC_vs_MS.Trt_F |
| NUDC       | 0.69664 | -0.2538 | 0.668 | 0.63 | 1 | HC_vs_MS.Trt_F |
| RP11-226E2 | 0.69681 | 0.35845 | 0.639 | 0.6  | 1 | HC_vs_MS.Trt_F |
| ZNF672     | 0.69696 | -0.6571 | 0.246 | 0.23 | 1 | HC_vs_MS.Trt_F |
| ZNF75A     | 0.697   | -0.6833 | 0.783 | 0.77 | 1 | HC_vs_MS.Trt_F |
| GIMAP6     | 0.69716 | -0.473  | 0.202 | 0.21 | 1 | HC_vs_MS.Trt_F |
| TESPA1     | 0.69734 | -0.2955 | 0.451 | 0.41 | 1 | HC_vs_MS.Trt_F |
| FSD1       | 0.69745 | 0.25891 | 0.457 | 0.43 | 1 | HC_vs_MS.Trt_F |
| KAT6B      | 0.69806 | 0.98764 | 0.136 | 0.12 | 1 | HC_vs_MS.Trt_F |
| RPL17-C18o | 0.69844 | 0.64278 | 0.09  | 0.1  | 1 | HC_vs_MS.Trt_F |
| CBX5       | 0.69866 | -0.305  | 0.934 | 0.93 | 1 | HC_vs_MS.Trt_F |

|          |         |         |       |      |   |                |
|----------|---------|---------|-------|------|---|----------------|
| ZNF175   | 0.70057 | 0.48566 | 0.211 | 0.22 | 1 | HC_vs_MS.Trt_F |
| GBP3     | 0.70147 | -0.633  | 0.225 | 0.2  | 1 | HC_vs_MS.Trt_F |
| SLC35A5  | 0.7022  | -0.5573 | 0.468 | 0.49 | 1 | HC_vs_MS.Trt_F |
| GOPC     | 0.70236 | -0.6908 | 0.145 | 0.13 | 1 | HC_vs_MS.Trt_F |
| CTSB     | 0.70247 | -0.5815 | 0.974 | 0.92 | 1 | HC_vs_MS.Trt_F |
| ZKSCAN5  | 0.70344 | -0.5382 | 0.691 | 0.63 | 1 | HC_vs_MS.Trt_F |
| CYB5D1   | 0.70349 | 0.47583 | 0.205 | 0.19 | 1 | HC_vs_MS.Trt_F |
| EPHX1    | 0.70379 | 0.58396 | 0.107 | 0.1  | 1 | HC_vs_MS.Trt_F |
| TMEM11   | 0.70386 | -0.5781 | 0.124 | 0.13 | 1 | HC_vs_MS.Trt_F |
| RPS21    | 0.70407 | -0.2931 | 0.442 | 0.44 | 1 | HC_vs_MS.Trt_F |
| MTRR     | 0.70449 | -0.4131 | 0.208 | 0.19 | 1 | HC_vs_MS.Trt_F |
| ANKRD26  | 0.70479 | -0.3643 | 0.159 | 0.14 | 1 | HC_vs_MS.Trt_F |
| AZIN2    | 0.70521 | 0.83447 | 0.379 | 0.36 | 1 | HC_vs_MS.Trt_F |
| HENMT1   | 0.70557 | -0.3486 | 0.327 | 0.32 | 1 | HC_vs_MS.Trt_F |
| POMK     | 0.7056  | -0.3514 | 0.618 | 0.57 | 1 | HC_vs_MS.Trt_F |
| UFSP2    | 0.70721 | -0.3676 | 0.116 | 0.12 | 1 | HC_vs_MS.Trt_F |
| MBD4     | 0.70729 | -0.8766 | 0.263 | 0.26 | 1 | HC_vs_MS.Trt_F |
| IL2ORB   | 0.70747 | -0.5927 | 0.277 | 0.3  | 1 | HC_vs_MS.Trt_F |
| POT1     | 0.70776 | -1.1134 | 0.11  | 0.12 | 1 | HC_vs_MS.Trt_F |
| FBXO3    | 0.7078  | -0.4244 | 0.289 | 0.27 | 1 | HC_vs_MS.Trt_F |
| EBNA1BP2 | 0.70808 | -0.5334 | 0.552 | 0.54 | 1 | HC_vs_MS.Trt_F |
| JADE2    | 0.70817 | -0.4348 | 0.202 | 0.19 | 1 | HC_vs_MS.Trt_F |
| PITPNM2  | 0.7082  | 0.54101 | 0.445 | 0.41 | 1 | HC_vs_MS.Trt_F |
| BRCC3    | 0.70881 | -0.4559 | 0.272 | 0.25 | 1 | HC_vs_MS.Trt_F |
| BUD13    | 0.70919 | -0.6995 | 0.104 | 0.11 | 1 | HC_vs_MS.Trt_F |
| DSTYK    | 0.70938 | -0.5421 | 0.838 | 0.8  | 1 | HC_vs_MS.Trt_F |
| FBXW7    | 0.7096  | -0.5113 | 0.182 | 0.17 | 1 | HC_vs_MS.Trt_F |
| WFDC8    | 0.70971 | -0.2707 | 0.329 | 0.3  | 1 | HC_vs_MS.Trt_F |
| FUBP1    | 0.70973 | -0.674  | 0.419 | 0.41 | 1 | HC_vs_MS.Trt_F |
| INO80    | 0.71061 | -0.4336 | 0.147 | 0.13 | 1 | HC_vs_MS.Trt_F |
| PLPP1    | 0.71072 | -0.3875 | 0.11  | 0.1  | 1 | HC_vs_MS.Trt_F |
| PSMD12   | 0.71075 | -0.6645 | 0.769 | 0.72 | 1 | HC_vs_MS.Trt_F |
| TM7SF3   | 0.71133 | -0.399  | 0.951 | 0.96 | 1 | HC_vs_MS.Trt_F |
| TRAPPC9  | 0.71145 | -1.0618 | 0.139 | 0.14 | 1 | HC_vs_MS.Trt_F |
| ZNF17    | 0.7116  | -1.123  | 0.312 | 0.32 | 1 | HC_vs_MS.Trt_F |
| BRDT     | 0.71181 | -0.2505 | 0.598 | 0.55 | 1 | HC_vs_MS.Trt_F |
| LRRC40   | 0.71182 | -0.4424 | 0.156 | 0.14 | 1 | HC_vs_MS.Trt_F |
| C14orf1  | 0.71207 | -0.3641 | 0.306 | 0.29 | 1 | HC_vs_MS.Trt_F |
| TOB2     | 0.71217 | -0.2575 | 0.159 | 0.17 | 1 | HC_vs_MS.Trt_F |
| SLC31A1  | 0.71231 | 0.3709  | 0.78  | 0.78 | 1 | HC_vs_MS.Trt_F |

|         |         |         |       |      |   |                |
|---------|---------|---------|-------|------|---|----------------|
| HIP1    | 0.71243 | -0.3889 | 0.665 | 0.66 | 1 | HC_vs_MS.Trt_F |
| TUBD1   | 0.71261 | 0.28659 | 0.775 | 0.76 | 1 | HC_vs_MS.Trt_F |
| DSE     | 0.71304 | 0.51608 | 0.104 | 0.12 | 1 | HC_vs_MS.Trt_F |
| GTF2A2  | 0.71344 | -0.4861 | 0.633 | 0.6  | 1 | HC_vs_MS.Trt_F |
| ZNF418  | 0.71383 | 0.39064 | 0.194 | 0.21 | 1 | HC_vs_MS.Trt_F |
| ZNF350  | 0.714   | -1.1541 | 0.595 | 0.57 | 1 | HC_vs_MS.Trt_F |
| EIF2D   | 0.71421 | -0.3412 | 0.723 | 0.64 | 1 | HC_vs_MS.Trt_F |
| SDK2    | 0.71422 | -0.3113 | 0.555 | 0.54 | 1 | HC_vs_MS.Trt_F |
| TMPO    | 0.71442 | -0.4742 | 0.572 | 0.54 | 1 | HC_vs_MS.Trt_F |
| NBPF11  | 0.71454 | -0.3038 | 0.286 | 0.29 | 1 | HC_vs_MS.Trt_F |
| MRPL40  | 0.71516 | -0.5291 | 0.471 | 0.45 | 1 | HC_vs_MS.Trt_F |
| GORASP1 | 0.71528 | 0.442   | 0.092 | 0.1  | 1 | HC_vs_MS.Trt_F |
| ZNF211  | 0.7158  | -0.6462 | 0.202 | 0.21 | 1 | HC_vs_MS.Trt_F |
| ZBTB44  | 0.71612 | -0.4056 | 0.303 | 0.28 | 1 | HC_vs_MS.Trt_F |
| BTBD19  | 0.71614 | 0.49389 | 0.795 | 0.77 | 1 | HC_vs_MS.Trt_F |
| CRELD2  | 0.71616 | -0.8109 | 0.645 | 0.6  | 1 | HC_vs_MS.Trt_F |
| MINPP1  | 0.71633 | 1.31273 | 0.104 | 0.1  | 1 | HC_vs_MS.Trt_F |
| INCA1   | 0.71677 | -0.7727 | 0.211 | 0.22 | 1 | HC_vs_MS.Trt_F |
| GAL3ST4 | 0.71681 | -1.19   | 0.451 | 0.45 | 1 | HC_vs_MS.Trt_F |
| BCL2    | 0.71755 | -0.4203 | 0.277 | 0.26 | 1 | HC_vs_MS.Trt_F |
| GTPBP4  | 0.71766 | 0.81706 | 0.514 | 0.49 | 1 | HC_vs_MS.Trt_F |
| HLA-DMB | 0.71795 | 1.48397 | 0.107 | 0.1  | 1 | HC_vs_MS.Trt_F |
| PSME3   | 0.7181  | -0.2833 | 0.694 | 0.72 | 1 | HC_vs_MS.Trt_F |
| TRIP13  | 0.71835 | 0.30143 | 0.546 | 0.53 | 1 | HC_vs_MS.Trt_F |
| RASGRP2 | 0.71864 | 0.31105 | 0.301 | 0.31 | 1 | HC_vs_MS.Trt_F |
| ATL2    | 0.719   | 0.25499 | 0.879 | 0.84 | 1 | HC_vs_MS.Trt_F |
| LTV1    | 0.71945 | -0.373  | 0.139 | 0.14 | 1 | HC_vs_MS.Trt_F |
| LUZP1   | 0.71992 | 0.5339  | 0.561 | 0.55 | 1 | HC_vs_MS.Trt_F |
| PIGO    | 0.72088 | 0.27144 | 0.384 | 0.38 | 1 | HC_vs_MS.Trt_F |
| SMARCB1 | 0.72147 | 0.45059 | 0.538 | 0.55 | 1 | HC_vs_MS.Trt_F |
| ADAM33  | 0.72156 | 0.74871 | 0.107 | 0.12 | 1 | HC_vs_MS.Trt_F |
| TAF3    | 0.72171 | -0.3667 | 0.179 | 0.17 | 1 | HC_vs_MS.Trt_F |
| ACTR3   | 0.72179 | -0.3905 | 0.775 | 0.74 | 1 | HC_vs_MS.Trt_F |
| RARS2   | 0.72184 | 0.27766 | 0.598 | 0.59 | 1 | HC_vs_MS.Trt_F |
| OST4    | 0.72187 | -0.4848 | 0.416 | 0.36 | 1 | HC_vs_MS.Trt_F |
| COMMD9  | 0.72202 | -0.9585 | 0.503 | 0.49 | 1 | HC_vs_MS.Trt_F |
| BTN3A3  | 0.72209 | 0.30435 | 0.243 | 0.23 | 1 | HC_vs_MS.Trt_F |
| PHLPP2  | 0.7222  | 0.27306 | 0.818 | 0.84 | 1 | HC_vs_MS.Trt_F |
| FKTN    | 0.72239 | 0.60758 | 0.199 | 0.21 | 1 | HC_vs_MS.Trt_F |
| ZNF487  | 0.72261 | 0.55218 | 0.514 | 0.48 | 1 | HC_vs_MS.Trt_F |



|            |         |         |       |      |   |                |
|------------|---------|---------|-------|------|---|----------------|
| TMEM14C    | 0.72272 | -0.3597 | 0.142 | 0.13 | 1 | HC_vs_MS.Trt_F |
| MITD1      | 0.72285 | 0.33613 | 0.962 | 0.96 | 1 | HC_vs_MS.Trt_F |
| MKRN1      | 0.72307 | -0.5609 | 0.853 | 0.81 | 1 | HC_vs_MS.Trt_F |
| KRCC1      | 0.72317 | -0.4647 | 0.124 | 0.13 | 1 | HC_vs_MS.Trt_F |
| SCYL1      | 0.72338 | -0.4524 | 0.269 | 0.27 | 1 | HC_vs_MS.Trt_F |
| WDR97      | 0.7234  | -0.3321 | 0.546 | 0.5  | 1 | HC_vs_MS.Trt_F |
| AC240274.1 | 0.72367 | 0.59182 | 0.283 | 0.28 | 1 | HC_vs_MS.Trt_F |
| PHLDB3     | 0.72398 | 0.43595 | 0.665 | 0.64 | 1 | HC_vs_MS.Trt_F |
| PLA2G12A   | 0.72418 | 0.45257 | 0.679 | 0.64 | 1 | HC_vs_MS.Trt_F |
| GOLGA7     | 0.72438 | -0.2856 | 0.199 | 0.18 | 1 | HC_vs_MS.Trt_F |
| CAMKK1     | 0.7245  | -0.3433 | 0.22  | 0.23 | 1 | HC_vs_MS.Trt_F |
| WBP1L      | 0.72473 | -0.2741 | 0.124 | 0.11 | 1 | HC_vs_MS.Trt_F |
| ENOPH1     | 0.72476 | -0.3973 | 0.173 | 0.16 | 1 | HC_vs_MS.Trt_F |
| RNF31      | 0.72534 | 0.36793 | 0.312 | 0.32 | 1 | HC_vs_MS.Trt_F |
| RNF34      | 0.72538 | -0.5353 | 0.272 | 0.27 | 1 | HC_vs_MS.Trt_F |
| FAM91A1    | 0.72605 | 0.29757 | 0.344 | 0.34 | 1 | HC_vs_MS.Trt_F |
| PSMG1      | 0.7265  | -0.2973 | 0.188 | 0.17 | 1 | HC_vs_MS.Trt_F |
| TAF1C      | 0.72658 | 0.40035 | 0.118 | 0.11 | 1 | HC_vs_MS.Trt_F |
| PDCD4      | 0.72664 | -0.686  | 0.656 | 0.63 | 1 | HC_vs_MS.Trt_F |
| AVIL       | 0.72705 | 0.7057  | 0.408 | 0.39 | 1 | HC_vs_MS.Trt_F |
| SERPINB6   | 0.72722 | -0.5736 | 0.535 | 0.49 | 1 | HC_vs_MS.Trt_F |
| TMEM104    | 0.72725 | 0.52693 | 0.168 | 0.16 | 1 | HC_vs_MS.Trt_F |
| RP11-235E1 | 0.7273  | 0.63332 | 0.28  | 0.27 | 1 | HC_vs_MS.Trt_F |
| TOMM70     | 0.72771 | -0.8631 | 0.188 | 0.18 | 1 | HC_vs_MS.Trt_F |
| FAM234A    | 0.72782 | 0.30057 | 0.272 | 0.26 | 1 | HC_vs_MS.Trt_F |
| TCOF1      | 0.72816 | -0.7429 | 0.809 | 0.77 | 1 | HC_vs_MS.Trt_F |
| UPF1       | 0.72848 | 0.41263 | 0.13  | 0.14 | 1 | HC_vs_MS.Trt_F |
| WDFY1      | 0.72876 | -0.4572 | 0.39  | 0.35 | 1 | HC_vs_MS.Trt_F |
| CHP2       | 0.7288  | -0.2932 | 0.471 | 0.41 | 1 | HC_vs_MS.Trt_F |
| FAM133B    | 0.7289  | -0.4525 | 0.798 | 0.75 | 1 | HC_vs_MS.Trt_F |
| SMARCC1    | 0.72922 | 0.27704 | 0.462 | 0.44 | 1 | HC_vs_MS.Trt_F |
| COL4A3BP   | 0.72939 | -0.2513 | 0.168 | 0.16 | 1 | HC_vs_MS.Trt_F |
| THUMPD3    | 0.72982 | -0.2697 | 0.434 | 0.41 | 1 | HC_vs_MS.Trt_F |
| POLR1E     | 0.72989 | -0.566  | 0.142 | 0.13 | 1 | HC_vs_MS.Trt_F |
| MIEN1      | 0.72993 | -0.46   | 0.165 | 0.17 | 1 | HC_vs_MS.Trt_F |
| MGAT2      | 0.72999 | 0.25844 | 0.136 | 0.13 | 1 | HC_vs_MS.Trt_F |
| ATF6B      | 0.73051 | -0.3486 | 0.942 | 0.92 | 1 | HC_vs_MS.Trt_F |
| VPS45      | 0.73088 | 0.25631 | 0.289 | 0.28 | 1 | HC_vs_MS.Trt_F |
| VWA5B1     | 0.7311  | -0.2881 | 0.627 | 0.59 | 1 | HC_vs_MS.Trt_F |
| ZNF565     | 0.73135 | -0.2822 | 0.113 | 0.1  | 1 | HC_vs_MS.Trt_F |

|            |         |         |       |      |   |                |
|------------|---------|---------|-------|------|---|----------------|
| PHACTR1    | 0.73148 | 0.885   | 0.477 | 0.47 | 1 | HC_vs_MS.Trt_F |
| IDH3A      | 0.73212 | -0.4484 | 0.754 | 0.73 | 1 | HC_vs_MS.Trt_F |
| SSU72      | 0.73334 | -0.272  | 0.928 | 0.91 | 1 | HC_vs_MS.Trt_F |
| ACAD11     | 0.73358 | -0.7651 | 0.182 | 0.17 | 1 | HC_vs_MS.Trt_F |
| 7-Mar      | 0.7336  | -0.5855 | 0.263 | 0.27 | 1 | HC_vs_MS.Trt_F |
| TBC1D31    | 0.73361 | -0.2724 | 0.685 | 0.64 | 1 | HC_vs_MS.Trt_F |
| SMIM11A    | 0.73473 | 0.54916 | 0.295 | 0.31 | 1 | HC_vs_MS.Trt_F |
| CAND1      | 0.73527 | -0.4866 | 0.867 | 0.88 | 1 | HC_vs_MS.Trt_F |
| NIPA1      | 0.73556 | 0.71317 | 0.191 | 0.2  | 1 | HC_vs_MS.Trt_F |
| AGRN       | 0.73617 | 0.47907 | 0.416 | 0.41 | 1 | HC_vs_MS.Trt_F |
| NAGPA      | 0.73629 | 0.46105 | 0.665 | 0.67 | 1 | HC_vs_MS.Trt_F |
| ZNF10      | 0.73654 | -1.0029 | 0.136 | 0.13 | 1 | HC_vs_MS.Trt_F |
| SUMO1      | 0.73656 | -0.3138 | 0.523 | 0.5  | 1 | HC_vs_MS.Trt_F |
| GNE        | 0.73686 | -0.5916 | 0.225 | 0.23 | 1 | HC_vs_MS.Trt_F |
| COMMD2     | 0.73689 | -0.7697 | 0.376 | 0.35 | 1 | HC_vs_MS.Trt_F |
| RP11-644F5 | 0.73711 | -0.373  | 0.731 | 0.72 | 1 | HC_vs_MS.Trt_F |
| SOX4       | 0.73724 | -0.3822 | 0.104 | 0.1  | 1 | HC_vs_MS.Trt_F |
| C19orf54   | 0.73744 | -0.4017 | 0.486 | 0.49 | 1 | HC_vs_MS.Trt_F |
| ISCU       | 0.73756 | -0.4232 | 0.321 | 0.29 | 1 | HC_vs_MS.Trt_F |
| PSMB4      | 0.73773 | -0.5773 | 0.387 | 0.37 | 1 | HC_vs_MS.Trt_F |
| POLR3H     | 0.73787 | 1.15586 | 0.272 | 0.3  | 1 | HC_vs_MS.Trt_F |
| DECR2      | 0.73795 | -0.2982 | 0.847 | 0.78 | 1 | HC_vs_MS.Trt_F |
| FADS1      | 0.73816 | 0.40367 | 0.647 | 0.68 | 1 | HC_vs_MS.Trt_F |
| PODXL      | 0.73905 | 0.39189 | 0.211 | 0.2  | 1 | HC_vs_MS.Trt_F |
| YY1AP1     | 0.73983 | -0.2642 | 0.543 | 0.55 | 1 | HC_vs_MS.Trt_F |
| ABHD5      | 0.73993 | 0.57041 | 0.136 | 0.13 | 1 | HC_vs_MS.Trt_F |
| SVIL       | 0.74011 | 0.38941 | 0.185 | 0.19 | 1 | HC_vs_MS.Trt_F |
| DUSP23     | 0.74014 | -0.6678 | 0.136 | 0.12 | 1 | HC_vs_MS.Trt_F |
| ATP5L      | 0.74014 | -0.3496 | 0.462 | 0.42 | 1 | HC_vs_MS.Trt_F |
| CD8B       | 0.74025 | 1.29029 | 0.121 | 0.12 | 1 | HC_vs_MS.Trt_F |
| XYLT2      | 0.7408  | -0.5443 | 0.668 | 0.65 | 1 | HC_vs_MS.Trt_F |
| NOA1       | 0.74093 | 0.31067 | 0.121 | 0.11 | 1 | HC_vs_MS.Trt_F |
| CARS2      | 0.74129 | -0.265  | 0.78  | 0.75 | 1 | HC_vs_MS.Trt_F |
| C8orf33    | 0.74134 | -1.2721 | 0.249 | 0.25 | 1 | HC_vs_MS.Trt_F |
| RDH5       | 0.74136 | -0.3054 | 0.471 | 0.45 | 1 | HC_vs_MS.Trt_F |
| CRBN       | 0.74141 | -0.5164 | 0.486 | 0.44 | 1 | HC_vs_MS.Trt_F |
| COQ6       | 0.74142 | -0.4684 | 0.841 | 0.76 | 1 | HC_vs_MS.Trt_F |
| SNRPG      | 0.74175 | -0.3263 | 0.329 | 0.31 | 1 | HC_vs_MS.Trt_F |
| MGLL       | 0.74212 | 0.28991 | 0.431 | 0.41 | 1 | HC_vs_MS.Trt_F |
| LXN        | 0.74297 | -0.6012 | 0.202 | 0.19 | 1 | HC_vs_MS.Trt_F |

|            |         |         |       |      |   |                |
|------------|---------|---------|-------|------|---|----------------|
| VCP        | 0.74313 | -0.255  | 0.306 | 0.3  | 1 | HC_vs_MS.Trt_F |
| HLA-DRB4   | 0.74339 | 1.65898 | 0.124 | 0.12 | 1 | HC_vs_MS.Trt_F |
| SFT2D1     | 0.74345 | -0.6815 | 0.419 | 0.41 | 1 | HC_vs_MS.Trt_F |
| TRIM16     | 0.7437  | -1.0207 | 0.497 | 0.47 | 1 | HC_vs_MS.Trt_F |
| ZNF148     | 0.74376 | -0.5025 | 0.298 | 0.3  | 1 | HC_vs_MS.Trt_F |
| UBE3C      | 0.74382 | -0.5655 | 0.613 | 0.58 | 1 | HC_vs_MS.Trt_F |
| LSS        | 0.74394 | -0.4136 | 0.13  | 0.12 | 1 | HC_vs_MS.Trt_F |
| ZNF146     | 0.74404 | -0.4481 | 0.211 | 0.19 | 1 | HC_vs_MS.Trt_F |
| RP11-500M8 | 0.74422 | -0.8057 | 0.124 | 0.11 | 1 | HC_vs_MS.Trt_F |
| CCDC186    | 0.74469 | -0.3474 | 0.587 | 0.57 | 1 | HC_vs_MS.Trt_F |
| OSBPL11    | 0.74487 | -0.336  | 0.118 | 0.11 | 1 | HC_vs_MS.Trt_F |
| C5         | 0.74554 | -0.7066 | 0.465 | 0.46 | 1 | HC_vs_MS.Trt_F |
| UQCRCQ     | 0.7457  | -0.5642 | 0.598 | 0.57 | 1 | HC_vs_MS.Trt_F |
| MT1F       | 0.7462  | -0.4497 | 0.101 | 0.11 | 1 | HC_vs_MS.Trt_F |
| COA3       | 0.74683 | -0.7868 | 0.145 | 0.15 | 1 | HC_vs_MS.Trt_F |
| C15orf52   | 0.74689 | 0.33683 | 0.425 | 0.39 | 1 | HC_vs_MS.Trt_F |
| OMA1       | 0.747   | -0.4732 | 0.627 | 0.59 | 1 | HC_vs_MS.Trt_F |
| DBT        | 0.74714 | -0.5017 | 0.867 | 0.82 | 1 | HC_vs_MS.Trt_F |
| C2orf74    | 0.74762 | -0.3459 | 0.477 | 0.45 | 1 | HC_vs_MS.Trt_F |
| DNAJC3     | 0.74789 | -0.8359 | 0.592 | 0.53 | 1 | HC_vs_MS.Trt_F |
| TMEM128    | 0.74824 | -0.7886 | 0.171 | 0.16 | 1 | HC_vs_MS.Trt_F |
| CAMTA1     | 0.74832 | -0.654  | 0.159 | 0.17 | 1 | HC_vs_MS.Trt_F |
| FSCN1      | 0.74861 | 0.662   | 0.101 | 0.09 | 1 | HC_vs_MS.Trt_F |
| SRPX2      | 0.749   | 0.27206 | 0.251 | 0.26 | 1 | HC_vs_MS.Trt_F |
| IL18R1     | 0.74934 | 0.59986 | 0.142 | 0.13 | 1 | HC_vs_MS.Trt_F |
| FBXW8      | 0.7495  | 0.38846 | 0.321 | 0.33 | 1 | HC_vs_MS.Trt_F |
| DIDO1      | 0.74976 | -0.4684 | 0.199 | 0.2  | 1 | HC_vs_MS.Trt_F |
| TNIP3      | 0.75099 | 0.42624 | 0.512 | 0.48 | 1 | HC_vs_MS.Trt_F |
| ZNF549     | 0.75177 | -0.4007 | 0.688 | 0.67 | 1 | HC_vs_MS.Trt_F |
| ALDH1B1    | 0.75186 | -0.5971 | 0.662 | 0.63 | 1 | HC_vs_MS.Trt_F |
| MALSU1     | 0.75291 | -0.6812 | 0.121 | 0.13 | 1 | HC_vs_MS.Trt_F |
| PPP2R2D    | 0.75353 | -0.4818 | 0.65  | 0.63 | 1 | HC_vs_MS.Trt_F |
| SIL1       | 0.75383 | -0.266  | 0.116 | 0.12 | 1 | HC_vs_MS.Trt_F |
| IRAK2      | 0.75387 | 0.41144 | 0.341 | 0.35 | 1 | HC_vs_MS.Trt_F |
| UCHL3      | 0.75422 | -0.7069 | 0.159 | 0.14 | 1 | HC_vs_MS.Trt_F |
| CAPG       | 0.75454 | 0.41143 | 0.153 | 0.14 | 1 | HC_vs_MS.Trt_F |
| CASP3      | 0.75491 | -0.7454 | 0.173 | 0.16 | 1 | HC_vs_MS.Trt_F |
| TUBB3      | 0.75494 | 0.65781 | 0.292 | 0.3  | 1 | HC_vs_MS.Trt_F |
| CIPC       | 0.75513 | -0.3751 | 0.488 | 0.45 | 1 | HC_vs_MS.Trt_F |
| TMED7      | 0.75572 | -0.4831 | 0.098 | 0.1  | 1 | HC_vs_MS.Trt_F |

|          |         |         |       |      |   |                |
|----------|---------|---------|-------|------|---|----------------|
| FAM110C  | 0.75622 | -0.3534 | 0.275 | 0.26 | 1 | HC_vs_MS.Trt_F |
| VAMP3    | 0.75754 | -0.2535 | 0.353 | 0.35 | 1 | HC_vs_MS.Trt_F |
| KIF21B   | 0.75757 | 0.37248 | 0.434 | 0.43 | 1 | HC_vs_MS.Trt_F |
| GALNS    | 0.75777 | -0.3987 | 0.566 | 0.53 | 1 | HC_vs_MS.Trt_F |
| XPOT     | 0.75836 | -0.288  | 0.477 | 0.46 | 1 | HC_vs_MS.Trt_F |
| ZNF274   | 0.75854 | -0.3225 | 0.645 | 0.64 | 1 | HC_vs_MS.Trt_F |
| PPP3CA   | 0.75893 | -0.609  | 0.566 | 0.56 | 1 | HC_vs_MS.Trt_F |
| FBXW11   | 0.75911 | -0.6704 | 0.303 | 0.28 | 1 | HC_vs_MS.Trt_F |
| RANGRF   | 0.7592  | -0.3775 | 0.116 | 0.1  | 1 | HC_vs_MS.Trt_F |
| KLHL42   | 0.75944 | 0.51903 | 0.124 | 0.12 | 1 | HC_vs_MS.Trt_F |
| ASXL1    | 0.75946 | -0.681  | 0.214 | 0.19 | 1 | HC_vs_MS.Trt_F |
| UBXN6    | 0.75951 | -0.5589 | 0.095 | 0.1  | 1 | HC_vs_MS.Trt_F |
| TPSB2    | 0.75971 | 3.43554 | 0.286 | 0.28 | 1 | HC_vs_MS.Trt_F |
| RAD51B   | 0.7601  | -0.496  | 0.327 | 0.31 | 1 | HC_vs_MS.Trt_F |
| MAGOHB   | 0.76027 | 0.26353 | 0.098 | 0.1  | 1 | HC_vs_MS.Trt_F |
| SMPD4    | 0.76034 | -0.3315 | 0.318 | 0.3  | 1 | HC_vs_MS.Trt_F |
| BACE2    | 0.76052 | 0.66125 | 0.306 | 0.28 | 1 | HC_vs_MS.Trt_F |
| SRGAP1   | 0.76077 | 0.31849 | 0.954 | 0.96 | 1 | HC_vs_MS.Trt_F |
| NFU1     | 0.761   | 0.30535 | 0.162 | 0.17 | 1 | HC_vs_MS.Trt_F |
| PFDN5    | 0.76134 | -0.32   | 0.908 | 0.87 | 1 | HC_vs_MS.Trt_F |
| RPP21    | 0.76134 | -0.4291 | 0.197 | 0.18 | 1 | HC_vs_MS.Trt_F |
| DNPEP    | 0.76151 | 0.61396 | 0.48  | 0.49 | 1 | HC_vs_MS.Trt_F |
| BLZF1    | 0.76164 | 0.47849 | 0.509 | 0.5  | 1 | HC_vs_MS.Trt_F |
| CNIH4    | 0.76189 | -0.2984 | 0.636 | 0.62 | 1 | HC_vs_MS.Trt_F |
| CCNY     | 0.76214 | -0.5215 | 0.494 | 0.47 | 1 | HC_vs_MS.Trt_F |
| C16orf87 | 0.76246 | -0.351  | 0.812 | 0.79 | 1 | HC_vs_MS.Trt_F |
| SLC16A5  | 0.76306 | -0.2727 | 0.191 | 0.18 | 1 | HC_vs_MS.Trt_F |
| REC8     | 0.76323 | 0.54309 | 0.118 | 0.11 | 1 | HC_vs_MS.Trt_F |
| GRIN2B   | 0.76328 | 0.5456  | 0.237 | 0.22 | 1 | HC_vs_MS.Trt_F |
| LYAR     | 0.76341 | -0.6629 | 0.121 | 0.11 | 1 | HC_vs_MS.Trt_F |
| HYLS1    | 0.76345 | -0.6317 | 0.454 | 0.42 | 1 | HC_vs_MS.Trt_F |
| WBP11    | 0.76358 | -0.3339 | 0.327 | 0.3  | 1 | HC_vs_MS.Trt_F |
| RPUSD1   | 0.76409 | -0.4947 | 0.11  | 0.12 | 1 | HC_vs_MS.Trt_F |
| TAF4     | 0.76447 | 0.47933 | 0.133 | 0.13 | 1 | HC_vs_MS.Trt_F |
| ZNF781   | 0.76475 | -0.4454 | 0.301 | 0.28 | 1 | HC_vs_MS.Trt_F |
| YRDC     | 0.76476 | 0.42191 | 0.113 | 0.11 | 1 | HC_vs_MS.Trt_F |
| RBMX     | 0.76478 | -0.2512 | 0.815 | 0.77 | 1 | HC_vs_MS.Trt_F |
| MAD2L2   | 0.76485 | -0.3657 | 0.15  | 0.14 | 1 | HC_vs_MS.Trt_F |
| CDK2     | 0.76487 | 0.65252 | 0.113 | 0.1  | 1 | HC_vs_MS.Trt_F |
| GAA      | 0.76512 | 0.63392 | 0.101 | 0.09 | 1 | HC_vs_MS.Trt_F |

|         |         |         |       |      |   |                |
|---------|---------|---------|-------|------|---|----------------|
| FBN1    | 0.76524 | 0.2656  | 0.514 | 0.48 | 1 | HC_vs_MS.Trt_F |
| ZNF391  | 0.7654  | 0.56394 | 0.185 | 0.19 | 1 | HC_vs_MS.Trt_F |
| 15-Sep  | 0.76554 | -0.359  | 0.237 | 0.24 | 1 | HC_vs_MS.Trt_F |
| DUSP3   | 0.76558 | 0.42315 | 0.772 | 0.77 | 1 | HC_vs_MS.Trt_F |
| CREB3   | 0.76571 | -0.3816 | 0.104 | 0.11 | 1 | HC_vs_MS.Trt_F |
| RNF26   | 0.76623 | -1.119  | 0.127 | 0.13 | 1 | HC_vs_MS.Trt_F |
| SLC20A1 | 0.76666 | -0.2978 | 0.26  | 0.24 | 1 | HC_vs_MS.Trt_F |
| CEP70   | 0.76724 | -0.7208 | 0.156 | 0.16 | 1 | HC_vs_MS.Trt_F |
| MXD1    | 0.76724 | -0.3947 | 0.171 | 0.17 | 1 | HC_vs_MS.Trt_F |
| HECTD3  | 0.76809 | -0.266  | 0.145 | 0.15 | 1 | HC_vs_MS.Trt_F |
| EXOSC6  | 0.76826 | -0.4182 | 0.928 | 0.9  | 1 | HC_vs_MS.Trt_F |
| TEKT3   | 0.76854 | 0.28008 | 0.179 | 0.17 | 1 | HC_vs_MS.Trt_F |
| TSPAN5  | 0.76861 | 0.25066 | 0.645 | 0.62 | 1 | HC_vs_MS.Trt_F |
| MORF4L1 | 0.76891 | -0.3907 | 0.812 | 0.81 | 1 | HC_vs_MS.Trt_F |
| ATP6VOC | 0.76923 | 0.6044  | 0.283 | 0.27 | 1 | HC_vs_MS.Trt_F |
| GLIPR1  | 0.7695  | -0.3179 | 0.309 | 0.31 | 1 | HC_vs_MS.Trt_F |
| WWP1    | 0.76953 | -0.2685 | 0.451 | 0.42 | 1 | HC_vs_MS.Trt_F |
| BCL11B  | 0.76986 | -0.3629 | 0.465 | 0.45 | 1 | HC_vs_MS.Trt_F |
| CCP110  | 0.77099 | 0.44439 | 0.52  | 0.53 | 1 | HC_vs_MS.Trt_F |
| RIPK2   | 0.77223 | 0.25363 | 0.22  | 0.23 | 1 | HC_vs_MS.Trt_F |
| RGS5    | 0.77223 | 0.26151 | 0.11  | 0.1  | 1 | HC_vs_MS.Trt_F |
| CCDC90B | 0.77229 | -0.4331 | 0.951 | 0.91 | 1 | HC_vs_MS.Trt_F |
| ZNF284  | 0.77231 | -0.2779 | 0.613 | 0.58 | 1 | HC_vs_MS.Trt_F |
| PPM1A   | 0.77248 | -0.3117 | 0.179 | 0.18 | 1 | HC_vs_MS.Trt_F |
| LSM11   | 0.7727  | 0.35947 | 0.607 | 0.56 | 1 | HC_vs_MS.Trt_F |
| PRDX6   | 0.77297 | -0.7922 | 0.173 | 0.17 | 1 | HC_vs_MS.Trt_F |
| KIF2A   | 0.77301 | -0.5908 | 0.251 | 0.25 | 1 | HC_vs_MS.Trt_F |
| METTL2A | 0.77309 | -0.2849 | 0.74  | 0.68 | 1 | HC_vs_MS.Trt_F |
| MMP24   | 0.77344 | -0.2974 | 0.095 | 0.1  | 1 | HC_vs_MS.Trt_F |
| NUP54   | 0.77373 | -0.4012 | 0.208 | 0.19 | 1 | HC_vs_MS.Trt_F |
| ZNF491  | 0.77388 | 0.47683 | 0.488 | 0.45 | 1 | HC_vs_MS.Trt_F |
| SLCO4C1 | 0.7741  | -0.9179 | 0.188 | 0.19 | 1 | HC_vs_MS.Trt_F |
| TMEM25  | 0.77428 | -1.1996 | 0.402 | 0.4  | 1 | HC_vs_MS.Trt_F |
| MGAT4A  | 0.77439 | -0.3129 | 0.445 | 0.41 | 1 | HC_vs_MS.Trt_F |
| TM2D3   | 0.77441 | 0.28216 | 0.815 | 0.78 | 1 | HC_vs_MS.Trt_F |
| TRIM52  | 0.77448 | -0.3988 | 0.908 | 0.86 | 1 | HC_vs_MS.Trt_F |
| PSMG4   | 0.77458 | -0.303  | 0.789 | 0.79 | 1 | HC_vs_MS.Trt_F |
| THBS1   | 0.77471 | 0.60863 | 0.263 | 0.25 | 1 | HC_vs_MS.Trt_F |
| CD302   | 0.77484 | -0.8366 | 0.425 | 0.4  | 1 | HC_vs_MS.Trt_F |
| LIPE    | 0.77499 | -0.7804 | 0.396 | 0.34 | 1 | HC_vs_MS.Trt_F |

|         |         |         |       |      |   |                |
|---------|---------|---------|-------|------|---|----------------|
| PLEKHB1 | 0.77521 | -0.7196 | 0.107 | 0.1  | 1 | HC_vs_MS.Trt_F |
| AGBL5   | 0.77555 | -0.9484 | 0.179 | 0.17 | 1 | HC_vs_MS.Trt_F |
| MGST2   | 0.77583 | -0.7303 | 0.214 | 0.22 | 1 | HC_vs_MS.Trt_F |
| KYAT1   | 0.77676 | -0.767  | 0.173 | 0.16 | 1 | HC_vs_MS.Trt_F |
| NPIPA5  | 0.77699 | 0.70364 | 0.104 | 0.11 | 1 | HC_vs_MS.Trt_F |
| SNX8    | 0.77775 | -0.7893 | 0.15  | 0.14 | 1 | HC_vs_MS.Trt_F |
| ZNF292  | 0.7779  | -0.3668 | 0.824 | 0.78 | 1 | HC_vs_MS.Trt_F |
| UBP1    | 0.7786  | 0.46721 | 0.13  | 0.12 | 1 | HC_vs_MS.Trt_F |
| RGL4    | 0.77926 | 0.35089 | 0.263 | 0.26 | 1 | HC_vs_MS.Trt_F |
| CSE1L   | 0.77932 | -0.7904 | 0.225 | 0.22 | 1 | HC_vs_MS.Trt_F |
| MED31   | 0.77933 | -0.5252 | 0.133 | 0.14 | 1 | HC_vs_MS.Trt_F |
| AKR1C2  | 0.77976 | 1.09875 | 0.107 | 0.1  | 1 | HC_vs_MS.Trt_F |
| ALKBH3  | 0.77977 | 0.67316 | 0.113 | 0.1  | 1 | HC_vs_MS.Trt_F |
| ZXDC    | 0.77997 | 0.59538 | 0.116 | 0.11 | 1 | HC_vs_MS.Trt_F |
| AP3S2   | 0.78046 | -0.4166 | 0.725 | 0.68 | 1 | HC_vs_MS.Trt_F |
| ZNF19   | 0.78065 | 0.30331 | 0.815 | 0.8  | 1 | HC_vs_MS.Trt_F |
| RPS6KA2 | 0.78102 | -0.4197 | 0.113 | 0.1  | 1 | HC_vs_MS.Trt_F |
| ABHD12  | 0.78155 | -0.2524 | 0.118 | 0.12 | 1 | HC_vs_MS.Trt_F |
| GANC    | 0.78209 | -0.8154 | 0.665 | 0.65 | 1 | HC_vs_MS.Trt_F |
| LIMK2   | 0.7824  | -0.2881 | 0.182 | 0.19 | 1 | HC_vs_MS.Trt_F |
| THUMPD2 | 0.78351 | -0.5523 | 0.41  | 0.42 | 1 | HC_vs_MS.Trt_F |
| PTCD1   | 0.7844  | 0.46928 | 0.624 | 0.63 | 1 | HC_vs_MS.Trt_F |
| CECR2   | 0.78455 | 0.41214 | 0.558 | 0.6  | 1 | HC_vs_MS.Trt_F |
| RBBP5   | 0.78462 | -0.5989 | 0.59  | 0.57 | 1 | HC_vs_MS.Trt_F |
| MLPH    | 0.78469 | 1.01299 | 0.514 | 0.48 | 1 | HC_vs_MS.Trt_F |
| WNT9A   | 0.7854  | -0.5618 | 0.113 | 0.11 | 1 | HC_vs_MS.Trt_F |
| ZNF655  | 0.78615 | 0.25346 | 0.616 | 0.61 | 1 | HC_vs_MS.Trt_F |
| NDUFA13 | 0.78715 | -0.2687 | 0.506 | 0.48 | 1 | HC_vs_MS.Trt_F |
| TK2     | 0.78752 | 0.77386 | 0.168 | 0.17 | 1 | HC_vs_MS.Trt_F |
| BRWD3   | 0.78763 | -0.3155 | 0.153 | 0.14 | 1 | HC_vs_MS.Trt_F |
| ABLIM1  | 0.78853 | -0.3206 | 0.373 | 0.34 | 1 | HC_vs_MS.Trt_F |
| GBA     | 0.78871 | -0.4675 | 0.506 | 0.48 | 1 | HC_vs_MS.Trt_F |
| FBXO28  | 0.78877 | 0.422   | 0.116 | 0.11 | 1 | HC_vs_MS.Trt_F |
| APOL1   | 0.78968 | -0.7509 | 0.702 | 0.7  | 1 | HC_vs_MS.Trt_F |
| BICD2   | 0.7904  | -0.5601 | 0.116 | 0.12 | 1 | HC_vs_MS.Trt_F |
| IL18    | 0.79053 | 0.78307 | 0.491 | 0.49 | 1 | HC_vs_MS.Trt_F |
| CCT5    | 0.79062 | -0.3287 | 0.223 | 0.21 | 1 | HC_vs_MS.Trt_F |
| SH3KBP1 | 0.79094 | -0.3366 | 0.497 | 0.47 | 1 | HC_vs_MS.Trt_F |
| TWISTNB | 0.79109 | -0.6602 | 0.136 | 0.14 | 1 | HC_vs_MS.Trt_F |
| KCMF1   | 0.79136 | -0.7844 | 0.54  | 0.52 | 1 | HC_vs_MS.Trt_F |

|             |         |         |       |      |   |                |
|-------------|---------|---------|-------|------|---|----------------|
| ZNF273      | 0.79232 | -0.4907 | 0.936 | 0.89 | 1 | HC_vs_MS.Trt_F |
| DBN1        | 0.79285 | -0.6115 | 0.249 | 0.23 | 1 | HC_vs_MS.Trt_F |
| PEX14       | 0.79336 | 0.56151 | 0.124 | 0.12 | 1 | HC_vs_MS.Trt_F |
| DNAJB7      | 0.7934  | -0.394  | 0.249 | 0.23 | 1 | HC_vs_MS.Trt_F |
| IL27RA      | 0.79363 | -0.4721 | 0.402 | 0.39 | 1 | HC_vs_MS.Trt_F |
| SLC35A3     | 0.79399 | 0.30982 | 0.835 | 0.82 | 1 | HC_vs_MS.Trt_F |
| NUDT15      | 0.79445 | -1.0434 | 0.63  | 0.59 | 1 | HC_vs_MS.Trt_F |
| ATP5H       | 0.79478 | -0.3887 | 0.806 | 0.75 | 1 | HC_vs_MS.Trt_F |
| BDH1        | 0.79509 | 0.33394 | 0.908 | 0.89 | 1 | HC_vs_MS.Trt_F |
| RABAC1      | 0.79531 | -0.5172 | 0.283 | 0.27 | 1 | HC_vs_MS.Trt_F |
| HIST1H2BE   | 0.79556 | 0.47056 | 0.335 | 0.32 | 1 | HC_vs_MS.Trt_F |
| BOP1        | 0.79559 | 0.32389 | 0.249 | 0.24 | 1 | HC_vs_MS.Trt_F |
| RP11-701H2  | 0.79562 | -0.2876 | 0.136 | 0.12 | 1 | HC_vs_MS.Trt_F |
| TMEM205     | 0.79569 | -0.4403 | 0.118 | 0.11 | 1 | HC_vs_MS.Trt_F |
| MUS81       | 0.79601 | -0.2653 | 0.159 | 0.16 | 1 | HC_vs_MS.Trt_F |
| FRMD4A      | 0.79609 | -0.281  | 0.656 | 0.65 | 1 | HC_vs_MS.Trt_F |
| ALG3        | 0.79647 | -0.7721 | 0.173 | 0.17 | 1 | HC_vs_MS.Trt_F |
| GTF2F2      | 0.7971  | -0.3512 | 0.211 | 0.2  | 1 | HC_vs_MS.Trt_F |
| TRAPPC6A    | 0.79759 | -0.3724 | 0.185 | 0.19 | 1 | HC_vs_MS.Trt_F |
| FAM83H      | 0.79782 | 0.49937 | 0.147 | 0.14 | 1 | HC_vs_MS.Trt_F |
| FLCN        | 0.79788 | 0.25435 | 0.893 | 0.88 | 1 | HC_vs_MS.Trt_F |
| AGBL2       | 0.79811 | 0.64793 | 0.28  | 0.29 | 1 | HC_vs_MS.Trt_F |
| TOMM6       | 0.79815 | -0.5391 | 0.24  | 0.22 | 1 | HC_vs_MS.Trt_F |
| TNS4        | 0.79881 | 0.32042 | 0.572 | 0.6  | 1 | HC_vs_MS.Trt_F |
| FBXL22      | 0.79946 | 0.51028 | 0.13  | 0.14 | 1 | HC_vs_MS.Trt_F |
| SSR2        | 0.79949 | -0.3006 | 0.902 | 0.9  | 1 | HC_vs_MS.Trt_F |
| SHMT2       | 0.79961 | -0.3326 | 0.254 | 0.25 | 1 | HC_vs_MS.Trt_F |
| LRFN3       | 0.79964 | 0.27267 | 0.63  | 0.6  | 1 | HC_vs_MS.Trt_F |
| SLC39A14    | 0.80001 | 0.93137 | 0.436 | 0.46 | 1 | HC_vs_MS.Trt_F |
| TNPO3       | 0.80082 | 0.48603 | 0.173 | 0.18 | 1 | HC_vs_MS.Trt_F |
| CD33        | 0.80108 | 0.31815 | 0.618 | 0.6  | 1 | HC_vs_MS.Trt_F |
| ZNF773      | 0.80124 | 0.37398 | 0.662 | 0.65 | 1 | HC_vs_MS.Trt_F |
| CEP170      | 0.80157 | 0.586   | 0.572 | 0.6  | 1 | HC_vs_MS.Trt_F |
| IL10RA      | 0.802   | -0.2577 | 0.578 | 0.55 | 1 | HC_vs_MS.Trt_F |
| DCTD        | 0.80205 | -0.5592 | 0.153 | 0.14 | 1 | HC_vs_MS.Trt_F |
| AMMECR1     | 0.8022  | -0.2658 | 0.159 | 0.15 | 1 | HC_vs_MS.Trt_F |
| C19orf53    | 0.80224 | -0.5344 | 0.405 | 0.37 | 1 | HC_vs_MS.Trt_F |
| PSMC3       | 0.8025  | -0.7135 | 0.185 | 0.17 | 1 | HC_vs_MS.Trt_F |
| FADS3       | 0.80288 | -0.261  | 0.662 | 0.59 | 1 | HC_vs_MS.Trt_F |
| CTD-314811C | 0.80324 | -0.2946 | 0.11  | 0.12 | 1 | HC_vs_MS.Trt_F |

|          |         |         |       |      |   |                |
|----------|---------|---------|-------|------|---|----------------|
| DOCK5    | 0.80341 | 0.34312 | 0.587 | 0.6  | 1 | HC_vs_MS.Trt_F |
| ZSCAN25  | 0.80409 | -0.4378 | 0.462 | 0.46 | 1 | HC_vs_MS.Trt_F |
| LETMD1   | 0.80431 | -0.3235 | 0.858 | 0.83 | 1 | HC_vs_MS.Trt_F |
| PPP1R3B  | 0.80434 | -0.7261 | 0.286 | 0.28 | 1 | HC_vs_MS.Trt_F |
| NDUFS8   | 0.80444 | -0.2653 | 0.835 | 0.84 | 1 | HC_vs_MS.Trt_F |
| ACTR3C   | 0.80514 | -0.4457 | 0.561 | 0.53 | 1 | HC_vs_MS.Trt_F |
| RALBP1   | 0.80534 | -0.3243 | 0.454 | 0.44 | 1 | HC_vs_MS.Trt_F |
| S1PR5    | 0.80545 | 0.25714 | 0.121 | 0.13 | 1 | HC_vs_MS.Trt_F |
| TMEM79   | 0.80578 | -0.4998 | 0.098 | 0.1  | 1 | HC_vs_MS.Trt_F |
| RNF103   | 0.80596 | -0.4503 | 0.639 | 0.63 | 1 | HC_vs_MS.Trt_F |
| EML5     | 0.80701 | 0.39504 | 0.243 | 0.23 | 1 | HC_vs_MS.Trt_F |
| PLXNA4   | 0.80718 | 0.26007 | 0.104 | 0.1  | 1 | HC_vs_MS.Trt_F |
| MRS2     | 0.8073  | 0.64321 | 0.812 | 0.86 | 1 | HC_vs_MS.Trt_F |
| NUP50    | 0.80736 | -0.5488 | 0.734 | 0.67 | 1 | HC_vs_MS.Trt_F |
| E2F5     | 0.80743 | -0.7842 | 0.393 | 0.4  | 1 | HC_vs_MS.Trt_F |
| BDH2     | 0.80753 | -0.5664 | 0.234 | 0.22 | 1 | HC_vs_MS.Trt_F |
| NAE1     | 0.80755 | -0.7512 | 0.737 | 0.73 | 1 | HC_vs_MS.Trt_F |
| ZCCHC17  | 0.80766 | -0.3523 | 0.142 | 0.13 | 1 | HC_vs_MS.Trt_F |
| UTP4     | 0.80787 | -0.3572 | 0.838 | 0.81 | 1 | HC_vs_MS.Trt_F |
| BPHL     | 0.80854 | -0.2521 | 0.694 | 0.63 | 1 | HC_vs_MS.Trt_F |
| RSL1D1   | 0.80883 | -0.2904 | 0.884 | 0.85 | 1 | HC_vs_MS.Trt_F |
| CLDND1   | 0.8089  | -0.5796 | 0.379 | 0.37 | 1 | HC_vs_MS.Trt_F |
| REST     | 0.80931 | -0.3702 | 0.188 | 0.19 | 1 | HC_vs_MS.Trt_F |
| DAZAP2   | 0.80945 | -0.289  | 0.861 | 0.81 | 1 | HC_vs_MS.Trt_F |
| RPUSD2   | 0.80954 | -0.8132 | 0.15  | 0.16 | 1 | HC_vs_MS.Trt_F |
| ZNF540   | 0.81003 | -0.8824 | 0.494 | 0.49 | 1 | HC_vs_MS.Trt_F |
| TAZ      | 0.81016 | 0.30456 | 0.59  | 0.58 | 1 | HC_vs_MS.Trt_F |
| ZDHC16   | 0.81041 | -0.4829 | 0.118 | 0.11 | 1 | HC_vs_MS.Trt_F |
| LCLAT1   | 0.81116 | -0.2566 | 0.835 | 0.8  | 1 | HC_vs_MS.Trt_F |
| VPS26B   | 0.81117 | 0.25278 | 0.118 | 0.12 | 1 | HC_vs_MS.Trt_F |
| MUC20    | 0.81162 | 0.3292  | 0.558 | 0.54 | 1 | HC_vs_MS.Trt_F |
| AKAP8L   | 0.81187 | 0.64955 | 0.104 | 0.1  | 1 | HC_vs_MS.Trt_F |
| IDO1     | 0.81212 | -0.2691 | 0.543 | 0.53 | 1 | HC_vs_MS.Trt_F |
| ZNF71    | 0.81246 | -0.516  | 0.292 | 0.27 | 1 | HC_vs_MS.Trt_F |
| LIPC     | 0.81251 | 0.46347 | 0.332 | 0.34 | 1 | HC_vs_MS.Trt_F |
| TNFSF4   | 0.81252 | 0.95085 | 0.136 | 0.13 | 1 | HC_vs_MS.Trt_F |
| PLAA     | 0.81305 | -0.3738 | 0.133 | 0.14 | 1 | HC_vs_MS.Trt_F |
| RAP1GDS1 | 0.81347 | -0.2579 | 0.379 | 0.36 | 1 | HC_vs_MS.Trt_F |
| EGFL8    | 0.81348 | 0.25633 | 0.569 | 0.55 | 1 | HC_vs_MS.Trt_F |
| TELO2    | 0.81357 | -0.5547 | 0.113 | 0.12 | 1 | HC_vs_MS.Trt_F |



|          |         |         |       |      |   |                |
|----------|---------|---------|-------|------|---|----------------|
| KIAA1671 | 0.81513 | -0.3656 | 0.538 | 0.51 | 1 | HC_vs_MS.Trt_F |
| ACTR1A   | 0.81533 | 0.30204 | 0.506 | 0.47 | 1 | HC_vs_MS.Trt_F |
| SF3B6    | 0.81578 | -0.4135 | 0.214 | 0.2  | 1 | HC_vs_MS.Trt_F |
| DTX3L    | 0.8158  | -0.466  | 0.711 | 0.66 | 1 | HC_vs_MS.Trt_F |
| TXK      | 0.81584 | -0.386  | 0.621 | 0.63 | 1 | HC_vs_MS.Trt_F |
| LRPPRC   | 0.81623 | -0.5618 | 0.532 | 0.47 | 1 | HC_vs_MS.Trt_F |
| MSRB3    | 0.8164  | 0.40214 | 0.523 | 0.51 | 1 | HC_vs_MS.Trt_F |
| KIAA1429 | 0.81664 | -0.5157 | 0.855 | 0.84 | 1 | HC_vs_MS.Trt_F |
| PLCL1    | 0.8167  | -1.1975 | 0.13  | 0.12 | 1 | HC_vs_MS.Trt_F |
| CDRT4    | 0.8168  | -0.3998 | 0.139 | 0.13 | 1 | HC_vs_MS.Trt_F |
| MSH6     | 0.8171  | -0.264  | 0.841 | 0.85 | 1 | HC_vs_MS.Trt_F |
| PRKAR2A  | 0.8179  | 0.33831 | 0.913 | 0.87 | 1 | HC_vs_MS.Trt_F |
| GYS1     | 0.81794 | -0.6043 | 0.165 | 0.16 | 1 | HC_vs_MS.Trt_F |
| TFB1M    | 0.81888 | -0.4724 | 0.448 | 0.45 | 1 | HC_vs_MS.Trt_F |
| MTHFD1L  | 0.81915 | -1.1539 | 0.139 | 0.14 | 1 | HC_vs_MS.Trt_F |
| CCDC43   | 0.81985 | -0.3454 | 0.113 | 0.12 | 1 | HC_vs_MS.Trt_F |
| TMEM185B | 0.81989 | 0.59876 | 0.335 | 0.34 | 1 | HC_vs_MS.Trt_F |
| ABHD2    | 0.81999 | -0.8705 | 0.659 | 0.65 | 1 | HC_vs_MS.Trt_F |
| CEP152   | 0.82001 | -0.5119 | 0.795 | 0.71 | 1 | HC_vs_MS.Trt_F |
| ATP6V1B2 | 0.82067 | -0.6023 | 0.711 | 0.67 | 1 | HC_vs_MS.Trt_F |
| TREML2   | 0.82168 | -1.0554 | 0.133 | 0.13 | 1 | HC_vs_MS.Trt_F |
| ZC3H11A  | 0.82232 | -0.2576 | 0.231 | 0.21 | 1 | HC_vs_MS.Trt_F |
| HACD1    | 0.82236 | -0.6386 | 0.636 | 0.62 | 1 | HC_vs_MS.Trt_F |
| TCEAL4   | 0.82257 | -0.3738 | 0.159 | 0.16 | 1 | HC_vs_MS.Trt_F |
| MAP4K2   | 0.8226  | -0.3265 | 0.708 | 0.69 | 1 | HC_vs_MS.Trt_F |
| RALB     | 0.82264 | -1.0798 | 0.13  | 0.13 | 1 | HC_vs_MS.Trt_F |
| LMO7     | 0.8229  | 0.37125 | 0.269 | 0.28 | 1 | HC_vs_MS.Trt_F |
| FBLN5    | 0.82291 | -1.0085 | 0.199 | 0.2  | 1 | HC_vs_MS.Trt_F |
| HBP1     | 0.82304 | 0.29528 | 0.812 | 0.8  | 1 | HC_vs_MS.Trt_F |
| UBL4A    | 0.82314 | -0.4273 | 0.118 | 0.12 | 1 | HC_vs_MS.Trt_F |
| SLC6A16  | 0.82333 | -1.0021 | 0.266 | 0.25 | 1 | HC_vs_MS.Trt_F |
| DENND1B  | 0.82392 | 0.42773 | 0.159 | 0.16 | 1 | HC_vs_MS.Trt_F |
| MRPL21   | 0.82459 | -0.401  | 0.124 | 0.13 | 1 | HC_vs_MS.Trt_F |
| RAB8A    | 0.82483 | -0.2912 | 0.607 | 0.57 | 1 | HC_vs_MS.Trt_F |
| ZNF133   | 0.82535 | 0.83081 | 0.454 | 0.46 | 1 | HC_vs_MS.Trt_F |
| RASAL1   | 0.82555 | 0.94408 | 0.318 | 0.31 | 1 | HC_vs_MS.Trt_F |
| PLEKHF2  | 0.82602 | -0.9028 | 0.101 | 0.1  | 1 | HC_vs_MS.Trt_F |
| CACNA1F  | 0.82608 | 0.55291 | 0.318 | 0.32 | 1 | HC_vs_MS.Trt_F |
| ZNF280C  | 0.82627 | 0.69738 | 0.298 | 0.29 | 1 | HC_vs_MS.Trt_F |
| SRRD     | 0.82651 | -0.2928 | 0.474 | 0.45 | 1 | HC_vs_MS.Trt_F |

|            |         |         |       |      |   |                |
|------------|---------|---------|-------|------|---|----------------|
| RETSAT     | 0.82747 | -0.5092 | 0.179 | 0.18 | 1 | HC_vs_MS.Trt_F |
| EIF3M      | 0.82783 | -0.2778 | 0.815 | 0.79 | 1 | HC_vs_MS.Trt_F |
| SLC23A3    | 0.82824 | -0.7839 | 0.483 | 0.46 | 1 | HC_vs_MS.Trt_F |
| CHST3      | 0.82838 | 1.34398 | 0.188 | 0.2  | 1 | HC_vs_MS.Trt_F |
| CENPK      | 0.82853 | -0.3422 | 0.824 | 0.79 | 1 | HC_vs_MS.Trt_F |
| C20orf194  | 0.82908 | -0.2782 | 0.344 | 0.33 | 1 | HC_vs_MS.Trt_F |
| HMGCL      | 0.82982 | 0.63511 | 0.624 | 0.6  | 1 | HC_vs_MS.Trt_F |
| FDPS       | 0.82993 | -0.3564 | 0.526 | 0.52 | 1 | HC_vs_MS.Trt_F |
| RP11-244H3 | 0.83045 | -1.7673 | 0.107 | 0.11 | 1 | HC_vs_MS.Trt_F |
| PHEX       | 0.83055 | 0.91046 | 0.104 | 0.1  | 1 | HC_vs_MS.Trt_F |
| PRRT2      | 0.83162 | 1.19115 | 0.208 | 0.22 | 1 | HC_vs_MS.Trt_F |
| SEC23A     | 0.83171 | -0.3607 | 0.96  | 0.95 | 1 | HC_vs_MS.Trt_F |
| ANXA2R     | 0.83215 | -0.5456 | 0.182 | 0.18 | 1 | HC_vs_MS.Trt_F |
| MFGE8      | 0.83252 | -0.3925 | 0.604 | 0.55 | 1 | HC_vs_MS.Trt_F |
| UBE2V2     | 0.83394 | -0.7794 | 0.734 | 0.68 | 1 | HC_vs_MS.Trt_F |
| ATP6V1G1   | 0.83395 | -0.3973 | 0.425 | 0.41 | 1 | HC_vs_MS.Trt_F |
| RPL26L1    | 0.83407 | -0.6003 | 0.165 | 0.17 | 1 | HC_vs_MS.Trt_F |
| ZBTB33     | 0.83412 | -0.5524 | 0.101 | 0.09 | 1 | HC_vs_MS.Trt_F |
| RABEP1     | 0.83511 | -0.7142 | 0.225 | 0.21 | 1 | HC_vs_MS.Trt_F |
| ZNF830     | 0.83586 | -0.39   | 0.104 | 0.11 | 1 | HC_vs_MS.Trt_F |
| GOSR1      | 0.8359  | -0.3379 | 0.971 | 0.97 | 1 | HC_vs_MS.Trt_F |
| MED4       | 0.83593 | -0.3607 | 0.636 | 0.62 | 1 | HC_vs_MS.Trt_F |
| EAPP       | 0.83614 | -0.2568 | 0.225 | 0.23 | 1 | HC_vs_MS.Trt_F |
| TRAT1      | 0.83621 | -0.3926 | 0.249 | 0.24 | 1 | HC_vs_MS.Trt_F |
| NEO1       | 0.83654 | -0.444  | 0.266 | 0.24 | 1 | HC_vs_MS.Trt_F |
| GIN1       | 0.8366  | -1.0796 | 0.379 | 0.37 | 1 | HC_vs_MS.Trt_F |
| NCR3       | 0.8369  | -0.7982 | 0.113 | 0.12 | 1 | HC_vs_MS.Trt_F |
| PRMT2      | 0.83695 | -0.4106 | 0.442 | 0.42 | 1 | HC_vs_MS.Trt_F |
| SETX       | 0.83716 | -0.2738 | 0.338 | 0.31 | 1 | HC_vs_MS.Trt_F |
| CYTH2      | 0.83747 | 0.37273 | 0.676 | 0.64 | 1 | HC_vs_MS.Trt_F |
| LY75-CD302 | 0.83748 | 0.67754 | 0.104 | 0.1  | 1 | HC_vs_MS.Trt_F |
| FEZ1       | 0.83756 | 0.35059 | 0.621 | 0.61 | 1 | HC_vs_MS.Trt_F |
| C2orf61    | 0.8376  | -0.854  | 0.15  | 0.14 | 1 | HC_vs_MS.Trt_F |
| CRK        | 0.83797 | 0.56077 | 0.639 | 0.63 | 1 | HC_vs_MS.Trt_F |
| PPAN       | 0.83797 | 0.41363 | 0.419 | 0.42 | 1 | HC_vs_MS.Trt_F |
| ZFP3       | 0.83933 | 1.53273 | 0.11  | 0.12 | 1 | HC_vs_MS.Trt_F |
| NEMP2      | 0.83949 | -0.4877 | 0.118 | 0.12 | 1 | HC_vs_MS.Trt_F |
| ZFYVE19    | 0.83968 | 0.70536 | 0.113 | 0.11 | 1 | HC_vs_MS.Trt_F |
| SERHL2     | 0.83994 | -0.5948 | 0.367 | 0.34 | 1 | HC_vs_MS.Trt_F |
| ZNF563     | 0.84005 | -1.6277 | 0.555 | 0.55 | 1 | HC_vs_MS.Trt_F |

|          |         |         |       |      |   |                |
|----------|---------|---------|-------|------|---|----------------|
| KLHL9    | 0.84055 | 0.49537 | 0.373 | 0.38 | 1 | HC_vs_MS.Trt_F |
| RNF145   | 0.84166 | -0.5804 | 0.191 | 0.19 | 1 | HC_vs_MS.Trt_F |
| DAAM2    | 0.84169 | -0.3871 | 0.468 | 0.42 | 1 | HC_vs_MS.Trt_F |
| ZNF507   | 0.84188 | -0.6719 | 0.197 | 0.18 | 1 | HC_vs_MS.Trt_F |
| CSNK2A1  | 0.8422  | -0.5084 | 0.76  | 0.71 | 1 | HC_vs_MS.Trt_F |
| NHLRC2   | 0.8424  | -0.2959 | 0.798 | 0.76 | 1 | HC_vs_MS.Trt_F |
| FAM110A  | 0.84245 | -0.5306 | 0.197 | 0.19 | 1 | HC_vs_MS.Trt_F |
| EBLN2    | 0.84271 | -0.4909 | 0.11  | 0.1  | 1 | HC_vs_MS.Trt_F |
| C21orf59 | 0.84272 | -0.2603 | 0.46  | 0.44 | 1 | HC_vs_MS.Trt_F |
| PLPP3    | 0.84289 | 0.75727 | 0.315 | 0.3  | 1 | HC_vs_MS.Trt_F |
| NADK2    | 0.84291 | -0.9866 | 0.5   | 0.48 | 1 | HC_vs_MS.Trt_F |
| YKT6     | 0.84322 | -0.5829 | 0.124 | 0.12 | 1 | HC_vs_MS.Trt_F |
| HAVCR1   | 0.84381 | 0.71587 | 0.373 | 0.39 | 1 | HC_vs_MS.Trt_F |
| KIAA1549 | 0.84383 | 0.61111 | 0.396 | 0.38 | 1 | HC_vs_MS.Trt_F |
| NAA40    | 0.84416 | -0.433  | 0.561 | 0.56 | 1 | HC_vs_MS.Trt_F |
| TEX14    | 0.84416 | -0.4315 | 0.116 | 0.11 | 1 | HC_vs_MS.Trt_F |
| PLXNC1   | 0.8443  | 0.6926  | 0.095 | 0.1  | 1 | HC_vs_MS.Trt_F |
| MAN2A1   | 0.84487 | -0.4446 | 0.26  | 0.25 | 1 | HC_vs_MS.Trt_F |
| TUFT1    | 0.84496 | -0.2783 | 0.396 | 0.37 | 1 | HC_vs_MS.Trt_F |
| SLC7A1   | 0.84539 | -0.2823 | 0.098 | 0.1  | 1 | HC_vs_MS.Trt_F |
| TTBK2    | 0.84577 | 0.93613 | 0.555 | 0.53 | 1 | HC_vs_MS.Trt_F |
| MYO18A   | 0.84663 | 0.29112 | 0.517 | 0.51 | 1 | HC_vs_MS.Trt_F |
| NR6A1    | 0.84692 | -0.6908 | 0.477 | 0.46 | 1 | HC_vs_MS.Trt_F |
| WDR92    | 0.84696 | 0.8012  | 0.743 | 0.71 | 1 | HC_vs_MS.Trt_F |
| TVP23A   | 0.84703 | -0.3167 | 0.517 | 0.51 | 1 | HC_vs_MS.Trt_F |
| STAR     | 0.84787 | 0.3932  | 0.286 | 0.29 | 1 | HC_vs_MS.Trt_F |
| ASPSCR1  | 0.84799 | -0.2558 | 0.668 | 0.64 | 1 | HC_vs_MS.Trt_F |
| EFCAB10  | 0.848   | 0.37019 | 0.205 | 0.2  | 1 | HC_vs_MS.Trt_F |
| ADPRM    | 0.84811 | -0.4201 | 0.098 | 0.1  | 1 | HC_vs_MS.Trt_F |
| USP53    | 0.84824 | -0.6102 | 0.604 | 0.57 | 1 | HC_vs_MS.Trt_F |
| MRPS27   | 0.84843 | 0.73381 | 0.506 | 0.54 | 1 | HC_vs_MS.Trt_F |
| METTLL10 | 0.84856 | -0.6752 | 0.324 | 0.32 | 1 | HC_vs_MS.Trt_F |
| TSTD2    | 0.84865 | -0.2544 | 0.121 | 0.13 | 1 | HC_vs_MS.Trt_F |
| PATZ1    | 0.84925 | -0.3844 | 0.118 | 0.11 | 1 | HC_vs_MS.Trt_F |
| ERF      | 0.8493  | 0.3884  | 0.11  | 0.1  | 1 | HC_vs_MS.Trt_F |
| SUGP1    | 0.85019 | -0.4258 | 0.486 | 0.46 | 1 | HC_vs_MS.Trt_F |
| MYL6B    | 0.85027 | -0.3636 | 0.604 | 0.57 | 1 | HC_vs_MS.Trt_F |
| RCCD1    | 0.85048 | 0.25714 | 0.202 | 0.2  | 1 | HC_vs_MS.Trt_F |
| CTPS1    | 0.85055 | 0.59325 | 0.676 | 0.66 | 1 | HC_vs_MS.Trt_F |
| PAXIP1   | 0.85067 | -0.5906 | 0.474 | 0.46 | 1 | HC_vs_MS.Trt_F |

|          |         |         |       |      |   |                |
|----------|---------|---------|-------|------|---|----------------|
| SERPINE2 | 0.85079 | -1.2037 | 0.367 | 0.35 | 1 | HC_vs_MS.Trt_F |
| CYB5R1   | 0.85093 | 0.52562 | 0.104 | 0.11 | 1 | HC_vs_MS.Trt_F |
| TMEM150C | 0.85161 | 0.76598 | 0.569 | 0.59 | 1 | HC_vs_MS.Trt_F |
| MSMO1    | 0.85218 | -0.602  | 0.555 | 0.54 | 1 | HC_vs_MS.Trt_F |
| PIN4     | 0.85238 | -1.1508 | 0.133 | 0.13 | 1 | HC_vs_MS.Trt_F |
| NUDCD2   | 0.85292 | -0.8554 | 0.786 | 0.77 | 1 | HC_vs_MS.Trt_F |
| SNTN     | 0.85355 | 0.33227 | 0.344 | 0.35 | 1 | HC_vs_MS.Trt_F |
| SLC25A53 | 0.85409 | 0.53273 | 0.483 | 0.46 | 1 | HC_vs_MS.Trt_F |
| SNX10    | 0.85446 | -0.8858 | 0.142 | 0.13 | 1 | HC_vs_MS.Trt_F |
| AVL9     | 0.85468 | -0.4755 | 0.922 | 0.9  | 1 | HC_vs_MS.Trt_F |
| TSC1     | 0.85469 | 0.46275 | 0.48  | 0.48 | 1 | HC_vs_MS.Trt_F |
| PGS1     | 0.85502 | 0.6926  | 0.633 | 0.65 | 1 | HC_vs_MS.Trt_F |
| SFMBT1   | 0.85532 | -0.6706 | 0.587 | 0.58 | 1 | HC_vs_MS.Trt_F |
| SARM1    | 0.85631 | -0.6307 | 0.422 | 0.42 | 1 | HC_vs_MS.Trt_F |
| TMEM45B  | 0.85633 | 0.27155 | 0.604 | 0.59 | 1 | HC_vs_MS.Trt_F |
| TUSC2    | 0.85722 | -0.2615 | 0.113 | 0.12 | 1 | HC_vs_MS.Trt_F |
| MRFAP1   | 0.85744 | -0.4837 | 0.341 | 0.34 | 1 | HC_vs_MS.Trt_F |
| MGME1    | 0.85745 | 0.27803 | 0.118 | 0.11 | 1 | HC_vs_MS.Trt_F |
| NAF1     | 0.8578  | 0.59629 | 0.497 | 0.47 | 1 | HC_vs_MS.Trt_F |
| CHMP1A   | 0.85797 | -0.3581 | 0.231 | 0.22 | 1 | HC_vs_MS.Trt_F |
| KNL1     | 0.85813 | 0.60693 | 0.451 | 0.43 | 1 | HC_vs_MS.Trt_F |
| PSMD1    | 0.85862 | -0.6195 | 0.217 | 0.21 | 1 | HC_vs_MS.Trt_F |
| RTKN2    | 0.85868 | -0.5034 | 0.532 | 0.5  | 1 | HC_vs_MS.Trt_F |
| WASF2    | 0.8598  | -0.2991 | 0.569 | 0.5  | 1 | HC_vs_MS.Trt_F |
| CAPZA2   | 0.8601  | -0.4085 | 0.908 | 0.9  | 1 | HC_vs_MS.Trt_F |
| COMMD8   | 0.86031 | -0.2631 | 0.118 | 0.11 | 1 | HC_vs_MS.Trt_F |
| MIS18BP1 | 0.86043 | -0.953  | 0.679 | 0.63 | 1 | HC_vs_MS.Trt_F |
| KSR1     | 0.86053 | 0.33557 | 0.28  | 0.29 | 1 | HC_vs_MS.Trt_F |
| RAD1     | 0.86057 | -0.2862 | 0.717 | 0.7  | 1 | HC_vs_MS.Trt_F |
| G6PC3    | 0.86085 | -0.4683 | 0.85  | 0.86 | 1 | HC_vs_MS.Trt_F |
| METRNL   | 0.86116 | -1.0646 | 0.121 | 0.12 | 1 | HC_vs_MS.Trt_F |
| PDIA4    | 0.86161 | 0.58674 | 0.101 | 0.1  | 1 | HC_vs_MS.Trt_F |
| CPNE8    | 0.86164 | -0.394  | 0.162 | 0.15 | 1 | HC_vs_MS.Trt_F |
| FMN1     | 0.86242 | 0.92793 | 0.269 | 0.27 | 1 | HC_vs_MS.Trt_F |
| UBE3A    | 0.86266 | -0.5677 | 0.598 | 0.57 | 1 | HC_vs_MS.Trt_F |
| ATP1B1   | 0.8632  | 0.27349 | 0.306 | 0.31 | 1 | HC_vs_MS.Trt_F |
| CDK7     | 0.86366 | -0.8816 | 0.22  | 0.22 | 1 | HC_vs_MS.Trt_F |
| MCM3     | 0.86371 | -0.5394 | 0.225 | 0.22 | 1 | HC_vs_MS.Trt_F |
| NBEAL1   | 0.86374 | 0.3472  | 0.899 | 0.86 | 1 | HC_vs_MS.Trt_F |
| GOLGB1   | 0.86378 | -0.4261 | 0.616 | 0.59 | 1 | HC_vs_MS.Trt_F |

|           |         |         |       |      |   |                |
|-----------|---------|---------|-------|------|---|----------------|
| VIL1      | 0.86409 | 0.79039 | 0.217 | 0.21 | 1 | HC_vs_MS.Trt_F |
| CWC15     | 0.86449 | -0.57   | 0.208 | 0.2  | 1 | HC_vs_MS.Trt_F |
| SLC25A4   | 0.86478 | -0.5629 | 0.318 | 0.31 | 1 | HC_vs_MS.Trt_F |
| MTERF4    | 0.86491 | -0.3665 | 0.431 | 0.39 | 1 | HC_vs_MS.Trt_F |
| THYN1     | 0.86525 | -0.2886 | 0.156 | 0.16 | 1 | HC_vs_MS.Trt_F |
| GIT1      | 0.86538 | -0.3179 | 0.234 | 0.22 | 1 | HC_vs_MS.Trt_F |
| FAM120AOS | 0.86564 | 0.36079 | 0.688 | 0.67 | 1 | HC_vs_MS.Trt_F |
| GMEB2     | 0.8658  | 0.25008 | 0.13  | 0.12 | 1 | HC_vs_MS.Trt_F |
| RAB43     | 0.8666  | 0.7211  | 0.228 | 0.22 | 1 | HC_vs_MS.Trt_F |
| ATP2C1    | 0.86685 | 0.33564 | 0.191 | 0.18 | 1 | HC_vs_MS.Trt_F |
| CAAP1     | 0.86692 | -0.4185 | 0.165 | 0.16 | 1 | HC_vs_MS.Trt_F |
| ZSCAN32   | 0.86806 | -0.3283 | 0.246 | 0.23 | 1 | HC_vs_MS.Trt_F |
| TPRA1     | 0.86881 | 0.36181 | 0.182 | 0.18 | 1 | HC_vs_MS.Trt_F |
| VAMP4     | 0.87003 | -0.3093 | 0.231 | 0.22 | 1 | HC_vs_MS.Trt_F |
| IARS      | 0.87122 | -0.5477 | 0.705 | 0.68 | 1 | HC_vs_MS.Trt_F |
| MAP3K7    | 0.87166 | -0.5528 | 0.159 | 0.15 | 1 | HC_vs_MS.Trt_F |
| SLC12A2   | 0.87173 | -0.782  | 0.572 | 0.57 | 1 | HC_vs_MS.Trt_F |
| NOP56     | 0.87229 | -0.5573 | 0.471 | 0.45 | 1 | HC_vs_MS.Trt_F |
| FANK1     | 0.87243 | -0.5774 | 0.211 | 0.19 | 1 | HC_vs_MS.Trt_F |
| APPL1     | 0.8728  | 0.90751 | 0.494 | 0.49 | 1 | HC_vs_MS.Trt_F |
| USP45     | 0.87342 | -0.9296 | 0.179 | 0.18 | 1 | HC_vs_MS.Trt_F |
| ARIH2     | 0.87344 | -0.681  | 0.994 | 0.97 | 1 | HC_vs_MS.Trt_F |
| SOCS7     | 0.87347 | 0.29669 | 0.439 | 0.45 | 1 | HC_vs_MS.Trt_F |
| GM2A      | 0.87407 | 0.52598 | 0.552 | 0.57 | 1 | HC_vs_MS.Trt_F |
| SAMM50    | 0.87411 | -0.6616 | 0.465 | 0.45 | 1 | HC_vs_MS.Trt_F |
| ZNF573    | 0.87446 | 0.453   | 0.413 | 0.42 | 1 | HC_vs_MS.Trt_F |
| IMMP1L    | 0.87479 | -0.6866 | 0.575 | 0.56 | 1 | HC_vs_MS.Trt_F |
| DYNC1I2   | 0.87593 | -0.732  | 0.231 | 0.21 | 1 | HC_vs_MS.Trt_F |
| COPS7B    | 0.87597 | 0.39686 | 0.769 | 0.76 | 1 | HC_vs_MS.Trt_F |
| GALNT7    | 0.87676 | -0.9275 | 0.107 | 0.1  | 1 | HC_vs_MS.Trt_F |
| OSMR      | 0.87722 | 0.88923 | 0.584 | 0.57 | 1 | HC_vs_MS.Trt_F |
| RNF43     | 0.87727 | -0.277  | 0.35  | 0.32 | 1 | HC_vs_MS.Trt_F |
| GABPA     | 0.87735 | 0.77535 | 0.113 | 0.11 | 1 | HC_vs_MS.Trt_F |
| EIF3A     | 0.87774 | -0.2674 | 0.448 | 0.44 | 1 | HC_vs_MS.Trt_F |
| ZNF425    | 0.87795 | -0.5635 | 0.445 | 0.44 | 1 | HC_vs_MS.Trt_F |
| CSGALNACT | 0.87838 | -0.2937 | 0.538 | 0.51 | 1 | HC_vs_MS.Trt_F |
| GCDH      | 0.87867 | -0.3491 | 0.197 | 0.19 | 1 | HC_vs_MS.Trt_F |
| COA1      | 0.87888 | -0.3205 | 0.772 | 0.75 | 1 | HC_vs_MS.Trt_F |
| GTF2E2    | 0.87907 | -0.2726 | 0.639 | 0.6  | 1 | HC_vs_MS.Trt_F |
| C3orf67   | 0.87959 | -0.7954 | 0.439 | 0.44 | 1 | HC_vs_MS.Trt_F |

|             |         |         |       |      |   |                |
|-------------|---------|---------|-------|------|---|----------------|
| GLCE        | 0.88042 | -0.6381 | 0.165 | 0.16 | 1 | HC_vs_MS.Trt_F |
| AD000671.6  | 0.88076 | -0.274  | 0.13  | 0.13 | 1 | HC_vs_MS.Trt_F |
| TMEM71      | 0.881   | 0.32081 | 0.116 | 0.12 | 1 | HC_vs_MS.Trt_F |
| ATAD1       | 0.88191 | -0.2963 | 0.173 | 0.18 | 1 | HC_vs_MS.Trt_F |
| MPHOSPH6    | 0.88202 | -0.3622 | 0.145 | 0.14 | 1 | HC_vs_MS.Trt_F |
| SUPT16H     | 0.88203 | -0.3125 | 0.731 | 0.69 | 1 | HC_vs_MS.Trt_F |
| VPS41       | 0.88223 | -0.2845 | 0.517 | 0.5  | 1 | HC_vs_MS.Trt_F |
| SMARCE1     | 0.88301 | -0.6357 | 0.523 | 0.49 | 1 | HC_vs_MS.Trt_F |
| RIMKLB      | 0.88326 | -0.844  | 0.118 | 0.12 | 1 | HC_vs_MS.Trt_F |
| NPTXR       | 0.88403 | 0.90346 | 0.355 | 0.32 | 1 | HC_vs_MS.Trt_F |
| LIN7B       | 0.88405 | -0.2932 | 0.338 | 0.33 | 1 | HC_vs_MS.Trt_F |
| ZNF213      | 0.88416 | -0.8806 | 0.523 | 0.5  | 1 | HC_vs_MS.Trt_F |
| TES         | 0.88426 | -0.6078 | 0.87  | 0.81 | 1 | HC_vs_MS.Trt_F |
| CSNK1G2     | 0.88438 | -0.4555 | 0.133 | 0.12 | 1 | HC_vs_MS.Trt_F |
| TOP3B       | 0.8844  | 0.36552 | 0.15  | 0.15 | 1 | HC_vs_MS.Trt_F |
| PDK2        | 0.88445 | -0.7302 | 0.292 | 0.28 | 1 | HC_vs_MS.Trt_F |
| HNRNPUL2    | 0.88466 | 0.57225 | 0.124 | 0.13 | 1 | HC_vs_MS.Trt_F |
| BRWD1       | 0.88497 | -0.4945 | 0.85  | 0.77 | 1 | HC_vs_MS.Trt_F |
| C8orf44-SGK | 0.88535 | 0.45844 | 0.101 | 0.1  | 1 | HC_vs_MS.Trt_F |
| DGUOK       | 0.8863  | -0.4202 | 0.217 | 0.22 | 1 | HC_vs_MS.Trt_F |
| FAM134B     | 0.88689 | 0.27259 | 0.113 | 0.12 | 1 | HC_vs_MS.Trt_F |
| UNK         | 0.88774 | 0.55271 | 0.127 | 0.12 | 1 | HC_vs_MS.Trt_F |
| COPS6       | 0.88803 | -0.2793 | 0.708 | 0.72 | 1 | HC_vs_MS.Trt_F |
| NUAK2       | 0.88832 | 0.63562 | 0.347 | 0.33 | 1 | HC_vs_MS.Trt_F |
| IL1RL1      | 0.88833 | 1.46852 | 0.124 | 0.12 | 1 | HC_vs_MS.Trt_F |
| FAM65C      | 0.88877 | 0.38043 | 0.41  | 0.39 | 1 | HC_vs_MS.Trt_F |
| CAMK2D      | 0.88936 | -0.4365 | 0.225 | 0.23 | 1 | HC_vs_MS.Trt_F |
| MTPAP       | 0.8896  | -0.5451 | 0.873 | 0.83 | 1 | HC_vs_MS.Trt_F |
| TIMELESS    | 0.88966 | -0.4489 | 0.393 | 0.37 | 1 | HC_vs_MS.Trt_F |
| PCMTD1      | 0.8898  | -0.7694 | 0.312 | 0.3  | 1 | HC_vs_MS.Trt_F |
| ATMIN       | 0.88986 | -0.6039 | 0.28  | 0.27 | 1 | HC_vs_MS.Trt_F |
| ANAPC11     | 0.89006 | -0.7519 | 0.422 | 0.4  | 1 | HC_vs_MS.Trt_F |
| BLOC1S3     | 0.89051 | -0.6989 | 0.65  | 0.6  | 1 | HC_vs_MS.Trt_F |
| KIAA1614    | 0.89115 | 0.46518 | 0.335 | 0.3  | 1 | HC_vs_MS.Trt_F |
| MAD2L1      | 0.89146 | -0.4221 | 0.477 | 0.45 | 1 | HC_vs_MS.Trt_F |
| TRAFD1      | 0.89153 | -0.3151 | 0.243 | 0.23 | 1 | HC_vs_MS.Trt_F |
| SAT2        | 0.89174 | 0.37889 | 0.127 | 0.12 | 1 | HC_vs_MS.Trt_F |
| THUMPD1     | 0.89194 | -0.393  | 0.806 | 0.79 | 1 | HC_vs_MS.Trt_F |
| RB1CC1      | 0.89219 | -0.3587 | 0.306 | 0.28 | 1 | HC_vs_MS.Trt_F |
| HDAC1       | 0.89223 | -0.2547 | 0.292 | 0.29 | 1 | HC_vs_MS.Trt_F |

|          |         |         |       |      |   |                |
|----------|---------|---------|-------|------|---|----------------|
| NDUFB10  | 0.89229 | -0.6509 | 0.26  | 0.25 | 1 | HC_vs_MS.Trt_F |
| RGMB     | 0.89295 | -0.5988 | 0.116 | 0.11 | 1 | HC_vs_MS.Trt_F |
| ZKSCAN1  | 0.89296 | -0.2547 | 0.974 | 0.96 | 1 | HC_vs_MS.Trt_F |
| KLHDC10  | 0.89299 | -0.3707 | 0.436 | 0.41 | 1 | HC_vs_MS.Trt_F |
| NAPB     | 0.89344 | -1.0948 | 0.448 | 0.44 | 1 | HC_vs_MS.Trt_F |
| AHI1     | 0.89383 | 0.46805 | 0.428 | 0.43 | 1 | HC_vs_MS.Trt_F |
| PCIF1    | 0.89402 | -0.3599 | 0.347 | 0.32 | 1 | HC_vs_MS.Trt_F |
| MSS51    | 0.89457 | 0.59009 | 0.581 | 0.54 | 1 | HC_vs_MS.Trt_F |
| SPRYD7   | 0.89473 | -0.2747 | 0.728 | 0.69 | 1 | HC_vs_MS.Trt_F |
| TYMS     | 0.89506 | -0.8174 | 0.251 | 0.24 | 1 | HC_vs_MS.Trt_F |
| HLA-DRB3 | 0.89537 | -0.5336 | 0.188 | 0.18 | 1 | HC_vs_MS.Trt_F |
| NEIL2    | 0.89548 | -0.3489 | 0.124 | 0.12 | 1 | HC_vs_MS.Trt_F |
| FAM229B  | 0.89596 | 0.25419 | 0.376 | 0.35 | 1 | HC_vs_MS.Trt_F |
| CWC25    | 0.89596 | -0.5941 | 0.384 | 0.4  | 1 | HC_vs_MS.Trt_F |
| PTCD2    | 0.89607 | -0.8201 | 0.61  | 0.61 | 1 | HC_vs_MS.Trt_F |
| OSTC     | 0.89621 | -0.3898 | 0.266 | 0.27 | 1 | HC_vs_MS.Trt_F |
| OVCA2    | 0.89631 | -0.8355 | 0.101 | 0.1  | 1 | HC_vs_MS.Trt_F |
| C10orf95 | 0.8965  | -0.4752 | 0.185 | 0.17 | 1 | HC_vs_MS.Trt_F |
| HINT2    | 0.89673 | -0.2506 | 0.107 | 0.1  | 1 | HC_vs_MS.Trt_F |
| SDC4     | 0.89701 | -0.7184 | 0.171 | 0.16 | 1 | HC_vs_MS.Trt_F |
| VSIG10   | 0.89743 | 0.25754 | 0.725 | 0.7  | 1 | HC_vs_MS.Trt_F |
| METTL15  | 0.89753 | 0.30611 | 0.396 | 0.41 | 1 | HC_vs_MS.Trt_F |
| RNF181   | 0.89768 | -0.5483 | 0.173 | 0.17 | 1 | HC_vs_MS.Trt_F |
| RSAD1    | 0.89812 | 0.38323 | 0.113 | 0.11 | 1 | HC_vs_MS.Trt_F |
| KLF10    | 0.89828 | -0.3284 | 0.098 | 0.1  | 1 | HC_vs_MS.Trt_F |
| UBA3     | 0.8984  | -0.3568 | 0.416 | 0.42 | 1 | HC_vs_MS.Trt_F |
| IGHMBP2  | 0.89873 | -0.7164 | 0.402 | 0.39 | 1 | HC_vs_MS.Trt_F |
| CD164    | 0.89885 | -0.3734 | 0.598 | 0.57 | 1 | HC_vs_MS.Trt_F |
| METTL17  | 0.89923 | -0.3883 | 0.685 | 0.63 | 1 | HC_vs_MS.Trt_F |
| GSTM1    | 0.8993  | -0.5568 | 0.194 | 0.18 | 1 | HC_vs_MS.Trt_F |
| PUF60    | 0.90006 | -0.2819 | 0.24  | 0.22 | 1 | HC_vs_MS.Trt_F |
| CDKN2AIP | 0.90059 | -0.5033 | 0.133 | 0.13 | 1 | HC_vs_MS.Trt_F |
| FBXL4    | 0.90074 | -0.4319 | 0.546 | 0.53 | 1 | HC_vs_MS.Trt_F |
| ADAMTSL4 | 0.9008  | -0.323  | 0.243 | 0.25 | 1 | HC_vs_MS.Trt_F |
| RFXANK   | 0.901   | -0.9553 | 0.26  | 0.25 | 1 | HC_vs_MS.Trt_F |
| CCND3    | 0.90216 | -0.3096 | 0.575 | 0.54 | 1 | HC_vs_MS.Trt_F |
| PTPN18   | 0.90222 | -0.4192 | 0.434 | 0.41 | 1 | HC_vs_MS.Trt_F |
| UBE2O    | 0.90243 | 0.54187 | 0.497 | 0.48 | 1 | HC_vs_MS.Trt_F |
| MTUS1    | 0.90264 | 0.45554 | 0.41  | 0.39 | 1 | HC_vs_MS.Trt_F |
| RALY     | 0.90282 | -0.3013 | 0.37  | 0.37 | 1 | HC_vs_MS.Trt_F |

|          |         |         |       |      |   |                |
|----------|---------|---------|-------|------|---|----------------|
| DNA2     | 0.90305 | -0.3356 | 0.231 | 0.23 | 1 | HC_vs_MS.Trt_F |
| SLCO2B1  | 0.90321 | 0.61676 | 0.379 | 0.36 | 1 | HC_vs_MS.Trt_F |
| NMI      | 0.90416 | 0.28489 | 0.309 | 0.31 | 1 | HC_vs_MS.Trt_F |
| CHPT1    | 0.90418 | -0.4152 | 0.642 | 0.63 | 1 | HC_vs_MS.Trt_F |
| SPAG16   | 0.90444 | 0.5502  | 0.494 | 0.47 | 1 | HC_vs_MS.Trt_F |
| ZNF530   | 0.90554 | 0.64939 | 0.509 | 0.51 | 1 | HC_vs_MS.Trt_F |
| C3orf38  | 0.90575 | 0.63034 | 0.104 | 0.1  | 1 | HC_vs_MS.Trt_F |
| BTN3A1   | 0.90579 | -0.2985 | 0.61  | 0.64 | 1 | HC_vs_MS.Trt_F |
| TOLLIP   | 0.90622 | -0.7314 | 0.142 | 0.13 | 1 | HC_vs_MS.Trt_F |
| CCDC59   | 0.90632 | -0.3644 | 0.162 | 0.16 | 1 | HC_vs_MS.Trt_F |
| NKIRAS1  | 0.90634 | -0.2543 | 0.298 | 0.29 | 1 | HC_vs_MS.Trt_F |
| PRIMPOL  | 0.90722 | 0.48896 | 0.11  | 0.11 | 1 | HC_vs_MS.Trt_F |
| TRAPPC2L | 0.90749 | -0.5367 | 0.136 | 0.13 | 1 | HC_vs_MS.Trt_F |
| STX1B    | 0.90776 | 0.52942 | 0.298 | 0.3  | 1 | HC_vs_MS.Trt_F |
| ZNF658   | 0.90802 | 0.62528 | 0.22  | 0.22 | 1 | HC_vs_MS.Trt_F |
| UXS1     | 0.90803 | -0.3313 | 0.254 | 0.25 | 1 | HC_vs_MS.Trt_F |
| MRPL19   | 0.90816 | -0.6763 | 0.283 | 0.27 | 1 | HC_vs_MS.Trt_F |
| VPS33A   | 0.90944 | -0.7331 | 0.876 | 0.88 | 1 | HC_vs_MS.Trt_F |
| PSMD4    | 0.90971 | -0.5043 | 0.694 | 0.68 | 1 | HC_vs_MS.Trt_F |
| COQ10A   | 0.90985 | 0.77704 | 0.549 | 0.54 | 1 | HC_vs_MS.Trt_F |
| TAF9     | 0.91012 | -0.2896 | 0.399 | 0.39 | 1 | HC_vs_MS.Trt_F |
| MRPL41   | 0.9104  | -0.5603 | 0.182 | 0.18 | 1 | HC_vs_MS.Trt_F |
| VDAC2    | 0.91045 | -0.2784 | 0.283 | 0.27 | 1 | HC_vs_MS.Trt_F |
| ZNRD1    | 0.91081 | -0.2722 | 0.153 | 0.15 | 1 | HC_vs_MS.Trt_F |
| MCU      | 0.91197 | 0.68915 | 0.257 | 0.27 | 1 | HC_vs_MS.Trt_F |
| GOLGA3   | 0.91236 | -0.4842 | 0.798 | 0.8  | 1 | HC_vs_MS.Trt_F |
| MKRN3    | 0.91245 | 0.6996  | 0.587 | 0.6  | 1 | HC_vs_MS.Trt_F |
| CAPN15   | 0.91251 | 1.0075  | 0.205 | 0.21 | 1 | HC_vs_MS.Trt_F |
| RAB4A    | 0.91255 | -0.7883 | 0.118 | 0.12 | 1 | HC_vs_MS.Trt_F |
| ZNF625   | 0.91298 | -0.307  | 0.289 | 0.28 | 1 | HC_vs_MS.Trt_F |
| TRPT1    | 0.91425 | 0.32927 | 0.118 | 0.12 | 1 | HC_vs_MS.Trt_F |
| MAD2L1BP | 0.91503 | -1.1248 | 0.191 | 0.18 | 1 | HC_vs_MS.Trt_F |
| MARK4    | 0.91696 | 0.25223 | 0.578 | 0.56 | 1 | HC_vs_MS.Trt_F |
| C15orf41 | 0.91722 | -0.4305 | 0.645 | 0.6  | 1 | HC_vs_MS.Trt_F |
| HTRA2    | 0.91734 | -0.5524 | 0.139 | 0.13 | 1 | HC_vs_MS.Trt_F |
| STRADB   | 0.91738 | -0.5632 | 0.101 | 0.1  | 1 | HC_vs_MS.Trt_F |
| MAPK1    | 0.91745 | -0.4838 | 0.592 | 0.54 | 1 | HC_vs_MS.Trt_F |
| TCEB2    | 0.91774 | -0.5134 | 0.35  | 0.32 | 1 | HC_vs_MS.Trt_F |
| ZFYVE26  | 0.91804 | 0.54415 | 0.876 | 0.87 | 1 | HC_vs_MS.Trt_F |
| ZFAND2A  | 0.91823 | -0.4004 | 0.121 | 0.12 | 1 | HC_vs_MS.Trt_F |



|            |         |         |       |      |   |                |
|------------|---------|---------|-------|------|---|----------------|
| PHAX       | 0.91875 | -0.2513 | 0.893 | 0.86 | 1 | HC_vs_MS.Trt_F |
| OPA1       | 0.91879 | -0.3545 | 0.156 | 0.16 | 1 | HC_vs_MS.Trt_F |
| ZNF862     | 0.91883 | -0.503  | 0.145 | 0.14 | 1 | HC_vs_MS.Trt_F |
| COA5       | 0.91929 | -0.5739 | 0.52  | 0.46 | 1 | HC_vs_MS.Trt_F |
| EMC7       | 0.92023 | -0.5908 | 0.22  | 0.21 | 1 | HC_vs_MS.Trt_F |
| RAB4B      | 0.92035 | -0.4101 | 0.384 | 0.35 | 1 | HC_vs_MS.Trt_F |
| VEPH1      | 0.9207  | 0.36174 | 0.113 | 0.12 | 1 | HC_vs_MS.Trt_F |
| STK11IP    | 0.9208  | -0.2612 | 0.101 | 0.1  | 1 | HC_vs_MS.Trt_F |
| IMPDH2     | 0.92105 | -0.3597 | 0.225 | 0.22 | 1 | HC_vs_MS.Trt_F |
| ADRM1      | 0.92116 | -0.3216 | 0.295 | 0.27 | 1 | HC_vs_MS.Trt_F |
| WDR7       | 0.92135 | -1.4352 | 0.373 | 0.36 | 1 | HC_vs_MS.Trt_F |
| ZNF224     | 0.92136 | -0.4418 | 0.451 | 0.45 | 1 | HC_vs_MS.Trt_F |
| SAMD3      | 0.92223 | -0.2509 | 0.295 | 0.28 | 1 | HC_vs_MS.Trt_F |
| TRAPPC4    | 0.92289 | -0.4509 | 0.936 | 0.9  | 1 | HC_vs_MS.Trt_F |
| ANKRD55    | 0.9233  | -0.3844 | 0.182 | 0.17 | 1 | HC_vs_MS.Trt_F |
| CEP128     | 0.92335 | -0.3219 | 0.202 | 0.2  | 1 | HC_vs_MS.Trt_F |
| HIST2H4B   | 0.92357 | 0.64055 | 0.176 | 0.17 | 1 | HC_vs_MS.Trt_F |
| LINC00116  | 0.92385 | -0.6275 | 0.176 | 0.17 | 1 | HC_vs_MS.Trt_F |
| HELLS      | 0.92419 | -0.5683 | 0.841 | 0.78 | 1 | HC_vs_MS.Trt_F |
| MYC        | 0.92429 | -0.8642 | 0.168 | 0.16 | 1 | HC_vs_MS.Trt_F |
| ACTN1      | 0.92479 | -1.4149 | 0.653 | 0.6  | 1 | HC_vs_MS.Trt_F |
| PCGF1      | 0.92489 | -0.3308 | 0.402 | 0.4  | 1 | HC_vs_MS.Trt_F |
| OAZ2       | 0.92521 | -0.6006 | 0.815 | 0.78 | 1 | HC_vs_MS.Trt_F |
| RP11-458D2 | 0.92574 | -0.4551 | 0.127 | 0.13 | 1 | HC_vs_MS.Trt_F |
| XBP1       | 0.92656 | -0.3259 | 0.188 | 0.18 | 1 | HC_vs_MS.Trt_F |
| GLRA3      | 0.92778 | 0.27553 | 0.306 | 0.32 | 1 | HC_vs_MS.Trt_F |
| ACRC       | 0.928   | -0.6628 | 0.454 | 0.44 | 1 | HC_vs_MS.Trt_F |
| TRIAP1     | 0.92811 | -0.3753 | 0.11  | 0.1  | 1 | HC_vs_MS.Trt_F |
| PDPN       | 0.92868 | 0.53994 | 0.514 | 0.5  | 1 | HC_vs_MS.Trt_F |
| GID4       | 0.92942 | 0.30336 | 0.702 | 0.67 | 1 | HC_vs_MS.Trt_F |
| GLT8D1     | 0.93022 | -0.8604 | 0.312 | 0.3  | 1 | HC_vs_MS.Trt_F |
| NSUN6      | 0.93034 | -0.338  | 0.728 | 0.68 | 1 | HC_vs_MS.Trt_F |
| SRGAP3     | 0.93038 | 1.18726 | 0.879 | 0.84 | 1 | HC_vs_MS.Trt_F |
| SETD6      | 0.93045 | 0.31845 | 0.462 | 0.46 | 1 | HC_vs_MS.Trt_F |
| DCAF12     | 0.93057 | -0.4405 | 0.179 | 0.17 | 1 | HC_vs_MS.Trt_F |
| ZFAT       | 0.93068 | 1.18924 | 0.338 | 0.33 | 1 | HC_vs_MS.Trt_F |
| CEPT1      | 0.93105 | -0.8201 | 0.361 | 0.34 | 1 | HC_vs_MS.Trt_F |
| BABAM1     | 0.93108 | -0.4669 | 0.63  | 0.62 | 1 | HC_vs_MS.Trt_F |
| SART3      | 0.93132 | -0.3797 | 0.185 | 0.18 | 1 | HC_vs_MS.Trt_F |
| EDEM1      | 0.93167 | -0.5364 | 0.335 | 0.32 | 1 | HC_vs_MS.Trt_F |

|          |         |         |       |      |   |                |
|----------|---------|---------|-------|------|---|----------------|
| SYNJ2BP  | 0.93175 | -0.2681 | 0.867 | 0.79 | 1 | HC_vs_MS.Trt_F |
| SFR1     | 0.93226 | 0.40526 | 0.292 | 0.3  | 1 | HC_vs_MS.Trt_F |
| TBC1D14  | 0.93239 | -0.3357 | 0.185 | 0.18 | 1 | HC_vs_MS.Trt_F |
| NUCB1    | 0.93289 | -0.3211 | 0.283 | 0.27 | 1 | HC_vs_MS.Trt_F |
| LLGL1    | 0.93334 | 0.71976 | 0.301 | 0.3  | 1 | HC_vs_MS.Trt_F |
| ROCK2    | 0.93378 | 0.88839 | 0.471 | 0.46 | 1 | HC_vs_MS.Trt_F |
| THAP11   | 0.93495 | -0.5228 | 0.101 | 0.1  | 1 | HC_vs_MS.Trt_F |
| EXT1     | 0.93499 | 0.68635 | 0.199 | 0.2  | 1 | HC_vs_MS.Trt_F |
| TIMP2    | 0.93512 | 1.03805 | 0.202 | 0.21 | 1 | HC_vs_MS.Trt_F |
| TP53INP1 | 0.93543 | -0.429  | 0.355 | 0.35 | 1 | HC_vs_MS.Trt_F |
| RRBP1    | 0.9356  | 0.52811 | 0.318 | 0.32 | 1 | HC_vs_MS.Trt_F |
| SNAPIN   | 0.93561 | 0.30073 | 0.147 | 0.15 | 1 | HC_vs_MS.Trt_F |
| GPAT4    | 0.93576 | 0.31836 | 0.783 | 0.73 | 1 | HC_vs_MS.Trt_F |
| SSBP1    | 0.93636 | -0.3063 | 0.699 | 0.69 | 1 | HC_vs_MS.Trt_F |
| SNRPA    | 0.93688 | -0.4835 | 0.298 | 0.28 | 1 | HC_vs_MS.Trt_F |
| ATP10D   | 0.93712 | 0.5269  | 0.405 | 0.39 | 1 | HC_vs_MS.Trt_F |
| SGCB     | 0.93727 | -0.5234 | 0.315 | 0.3  | 1 | HC_vs_MS.Trt_F |
| MCRIP1   | 0.93803 | -0.3984 | 0.41  | 0.41 | 1 | HC_vs_MS.Trt_F |
| ZC3H6    | 0.93831 | -0.5929 | 0.85  | 0.8  | 1 | HC_vs_MS.Trt_F |
| NDUFB4   | 0.93835 | -0.7513 | 0.254 | 0.24 | 1 | HC_vs_MS.Trt_F |
| CCT7     | 0.93841 | -0.2762 | 0.26  | 0.26 | 1 | HC_vs_MS.Trt_F |
| ZNF33A   | 0.93886 | -0.504  | 0.584 | 0.55 | 1 | HC_vs_MS.Trt_F |
| N4BP2L1  | 0.93887 | -0.4829 | 0.653 | 0.65 | 1 | HC_vs_MS.Trt_F |
| COMMD10  | 0.93901 | -0.2662 | 0.341 | 0.32 | 1 | HC_vs_MS.Trt_F |
| BIRC2    | 0.93924 | -0.8417 | 0.202 | 0.19 | 1 | HC_vs_MS.Trt_F |
| NPIP11   | 0.93943 | -0.4553 | 0.555 | 0.52 | 1 | HC_vs_MS.Trt_F |
| NECAP2   | 0.94073 | -0.5431 | 0.483 | 0.46 | 1 | HC_vs_MS.Trt_F |
| CNKSR1   | 0.94076 | 0.60786 | 0.176 | 0.17 | 1 | HC_vs_MS.Trt_F |
| NDUFB5   | 0.94102 | -0.3727 | 0.702 | 0.69 | 1 | HC_vs_MS.Trt_F |
| SCAF11   | 0.9413  | -0.6734 | 0.899 | 0.87 | 1 | HC_vs_MS.Trt_F |
| U2AF1    | 0.94143 | -0.3915 | 0.532 | 0.51 | 1 | HC_vs_MS.Trt_F |
| FCHSD1   | 0.94156 | -0.4155 | 0.327 | 0.3  | 1 | HC_vs_MS.Trt_F |
| COQ3     | 0.94222 | 0.29558 | 0.251 | 0.25 | 1 | HC_vs_MS.Trt_F |
| SRD5A3   | 0.9423  | -0.8327 | 0.413 | 0.39 | 1 | HC_vs_MS.Trt_F |
| CEBPZ    | 0.9423  | -0.5816 | 0.246 | 0.24 | 1 | HC_vs_MS.Trt_F |
| CUTC     | 0.94255 | -0.2761 | 0.162 | 0.16 | 1 | HC_vs_MS.Trt_F |
| TMBIM4   | 0.94281 | -0.3449 | 0.853 | 0.82 | 1 | HC_vs_MS.Trt_F |
| MTERF1   | 0.94315 | -1.1049 | 0.254 | 0.24 | 1 | HC_vs_MS.Trt_F |
| MZB1     | 0.94356 | -0.4661 | 0.656 | 0.63 | 1 | HC_vs_MS.Trt_F |
| CNGB1    | 0.94398 | 0.31554 | 0.338 | 0.33 | 1 | HC_vs_MS.Trt_F |

|            |         |         |       |      |   |                |
|------------|---------|---------|-------|------|---|----------------|
| DAPP1      | 0.94458 | -0.5734 | 0.251 | 0.25 | 1 | HC_vs_MS.Trt_F |
| NR2C2      | 0.94461 | -0.6128 | 0.656 | 0.62 | 1 | HC_vs_MS.Trt_F |
| TMEM248    | 0.94503 | -0.338  | 0.22  | 0.21 | 1 | HC_vs_MS.Trt_F |
| ISOC1      | 0.94513 | -0.5953 | 0.124 | 0.12 | 1 | HC_vs_MS.Trt_F |
| OSTM1      | 0.94541 | -0.4156 | 0.795 | 0.82 | 1 | HC_vs_MS.Trt_F |
| PDE3B      | 0.94561 | -0.6647 | 0.613 | 0.55 | 1 | HC_vs_MS.Trt_F |
| RGS13      | 0.94589 | -0.3415 | 0.442 | 0.4  | 1 | HC_vs_MS.Trt_F |
| PAXBP1     | 0.94594 | -0.9489 | 0.223 | 0.21 | 1 | HC_vs_MS.Trt_F |
| SSR1       | 0.94635 | -0.487  | 0.934 | 0.92 | 1 | HC_vs_MS.Trt_F |
| LGALS4     | 0.94695 | -0.5008 | 0.613 | 0.57 | 1 | HC_vs_MS.Trt_F |
| DHFR       | 0.94704 | -0.2923 | 0.639 | 0.61 | 1 | HC_vs_MS.Trt_F |
| TPK1       | 0.94818 | 0.70634 | 0.396 | 0.39 | 1 | HC_vs_MS.Trt_F |
| ANKRD16    | 0.94842 | -0.8221 | 0.471 | 0.46 | 1 | HC_vs_MS.Trt_F |
| PLOD1      | 0.94861 | -1.2311 | 0.691 | 0.68 | 1 | HC_vs_MS.Trt_F |
| SLC31A2    | 0.94869 | -1.2542 | 0.13  | 0.13 | 1 | HC_vs_MS.Trt_F |
| MRPL53     | 0.94876 | -0.4378 | 0.133 | 0.13 | 1 | HC_vs_MS.Trt_F |
| SMYD2      | 0.94887 | -0.2785 | 0.156 | 0.16 | 1 | HC_vs_MS.Trt_F |
| HAUS4      | 0.94899 | -1.1871 | 0.156 | 0.15 | 1 | HC_vs_MS.Trt_F |
| BOLA2      | 0.94902 | -0.2539 | 0.145 | 0.14 | 1 | HC_vs_MS.Trt_F |
| KIF1BP     | 0.94904 | -0.465  | 0.711 | 0.72 | 1 | HC_vs_MS.Trt_F |
| ASNS       | 0.94947 | 0.70169 | 0.283 | 0.28 | 1 | HC_vs_MS.Trt_F |
| PAFAH1B2   | 0.9495  | -0.7172 | 0.91  | 0.82 | 1 | HC_vs_MS.Trt_F |
| HERPUD1    | 0.94981 | -0.394  | 0.746 | 0.75 | 1 | HC_vs_MS.Trt_F |
| GRPEL2     | 0.95081 | -0.6161 | 0.275 | 0.27 | 1 | HC_vs_MS.Trt_F |
| POC5       | 0.95123 | -0.582  | 0.113 | 0.11 | 1 | HC_vs_MS.Trt_F |
| COX17      | 0.95126 | -0.3089 | 0.335 | 0.32 | 1 | HC_vs_MS.Trt_F |
| RAE1       | 0.9522  | -0.3124 | 0.139 | 0.13 | 1 | HC_vs_MS.Trt_F |
| ACP1       | 0.95296 | -0.2982 | 0.266 | 0.26 | 1 | HC_vs_MS.Trt_F |
| TOPORS-AS1 | 0.95407 | -0.6938 | 0.116 | 0.12 | 1 | HC_vs_MS.Trt_F |
| DYX1C1     | 0.95482 | -0.307  | 0.529 | 0.52 | 1 | HC_vs_MS.Trt_F |
| ADTRP      | 0.95526 | -0.2904 | 0.37  | 0.34 | 1 | HC_vs_MS.Trt_F |
| ABCA5      | 0.95559 | -0.6896 | 0.653 | 0.62 | 1 | HC_vs_MS.Trt_F |
| KDELRL1    | 0.95585 | -0.5046 | 0.266 | 0.25 | 1 | HC_vs_MS.Trt_F |
| RANBP10    | 0.95602 | 0.2949  | 0.159 | 0.16 | 1 | HC_vs_MS.Trt_F |
| FOXP1      | 0.95613 | -0.269  | 0.89  | 0.86 | 1 | HC_vs_MS.Trt_F |
| MZF1       | 0.9566  | 0.40328 | 0.133 | 0.13 | 1 | HC_vs_MS.Trt_F |
| ZNF813     | 0.95687 | -0.3151 | 0.763 | 0.77 | 1 | HC_vs_MS.Trt_F |
| MAP2K1     | 0.95725 | -0.5165 | 0.153 | 0.15 | 1 | HC_vs_MS.Trt_F |
| PCID2      | 0.95733 | -0.4384 | 0.361 | 0.35 | 1 | HC_vs_MS.Trt_F |
| POLR2M     | 0.95832 | -0.7379 | 0.165 | 0.16 | 1 | HC_vs_MS.Trt_F |

|           |         |         |       |      |   |                |
|-----------|---------|---------|-------|------|---|----------------|
| ZNF248    | 0.95902 | 0.29401 | 0.188 | 0.18 | 1 | HC_vs_MS.Trt_F |
| UBR2      | 0.95936 | 0.28142 | 0.549 | 0.54 | 1 | HC_vs_MS.Trt_F |
| ZNF654    | 0.95937 | -0.8138 | 0.145 | 0.14 | 1 | HC_vs_MS.Trt_F |
| SLC25A11  | 0.95957 | -0.4826 | 0.194 | 0.18 | 1 | HC_vs_MS.Trt_F |
| BOLA3     | 0.95987 | -0.472  | 0.54  | 0.52 | 1 | HC_vs_MS.Trt_F |
| MTFR1L    | 0.96001 | -0.2964 | 0.578 | 0.57 | 1 | HC_vs_MS.Trt_F |
| IFI30     | 0.96006 | -0.3953 | 0.364 | 0.35 | 1 | HC_vs_MS.Trt_F |
| HS3ST1    | 0.96017 | -0.4363 | 0.338 | 0.33 | 1 | HC_vs_MS.Trt_F |
| DR1       | 0.96044 | -0.5253 | 0.827 | 0.8  | 1 | HC_vs_MS.Trt_F |
| PPP2R3B   | 0.96099 | 0.40666 | 0.558 | 0.53 | 1 | HC_vs_MS.Trt_F |
| PAFAH2    | 0.96106 | -0.5723 | 0.566 | 0.54 | 1 | HC_vs_MS.Trt_F |
| GALNT1    | 0.96284 | -0.6477 | 0.101 | 0.1  | 1 | HC_vs_MS.Trt_F |
| BARD1     | 0.96327 | -0.501  | 0.159 | 0.15 | 1 | HC_vs_MS.Trt_F |
| SETD3     | 0.9634  | 0.33132 | 0.121 | 0.12 | 1 | HC_vs_MS.Trt_F |
| AGGF1     | 0.9636  | -0.4483 | 0.165 | 0.16 | 1 | HC_vs_MS.Trt_F |
| NR1H3     | 0.9639  | 1.12376 | 0.15  | 0.15 | 1 | HC_vs_MS.Trt_F |
| HSPA14    | 0.96399 | -0.4841 | 0.373 | 0.37 | 1 | HC_vs_MS.Trt_F |
| FARP2     | 0.96441 | -1.3568 | 0.376 | 0.35 | 1 | HC_vs_MS.Trt_F |
| DHTKD1    | 0.96441 | -0.5112 | 0.858 | 0.83 | 1 | HC_vs_MS.Trt_F |
| CTC-487M2 | 0.96469 | 0.51579 | 0.91  | 0.94 | 1 | HC_vs_MS.Trt_F |
| UQCR10    | 0.96498 | -0.537  | 0.364 | 0.34 | 1 | HC_vs_MS.Trt_F |
| SCRN2     | 0.96575 | -1.076  | 0.136 | 0.13 | 1 | HC_vs_MS.Trt_F |
| MOAP1     | 0.96577 | -0.5525 | 0.413 | 0.39 | 1 | HC_vs_MS.Trt_F |
| FAM124B   | 0.96634 | -1.1365 | 0.118 | 0.12 | 1 | HC_vs_MS.Trt_F |
| SMYD4     | 0.96672 | -0.8193 | 0.855 | 0.81 | 1 | HC_vs_MS.Trt_F |
| ANKRD18A  | 0.96699 | 0.55369 | 0.28  | 0.27 | 1 | HC_vs_MS.Trt_F |
| DNAH7     | 0.96779 | 0.3233  | 0.694 | 0.67 | 1 | HC_vs_MS.Trt_F |
| SEC61A2   | 0.96792 | -0.7279 | 0.113 | 0.11 | 1 | HC_vs_MS.Trt_F |
| GUCD1     | 0.96806 | -0.9516 | 0.512 | 0.48 | 1 | HC_vs_MS.Trt_F |
| ST20      | 0.96818 | 0.62886 | 0.254 | 0.25 | 1 | HC_vs_MS.Trt_F |
| ETAA1     | 0.96835 | -0.4956 | 0.15  | 0.15 | 1 | HC_vs_MS.Trt_F |
| DERA      | 0.96877 | -0.9728 | 0.113 | 0.11 | 1 | HC_vs_MS.Trt_F |
| ATP2A3    | 0.96903 | -0.284  | 0.338 | 0.33 | 1 | HC_vs_MS.Trt_F |
| PIGA      | 0.96912 | -0.3164 | 0.488 | 0.46 | 1 | HC_vs_MS.Trt_F |
| DOCK6     | 0.96916 | 0.89011 | 0.552 | 0.57 | 1 | HC_vs_MS.Trt_F |
| BTN2A2    | 0.97089 | 0.59185 | 0.101 | 0.1  | 1 | HC_vs_MS.Trt_F |
| CEP120    | 0.97112 | -0.6602 | 0.173 | 0.17 | 1 | HC_vs_MS.Trt_F |
| CLTB      | 0.97148 | 0.42969 | 0.107 | 0.11 | 1 | HC_vs_MS.Trt_F |
| SP110     | 0.97213 | -0.3158 | 0.705 | 0.68 | 1 | HC_vs_MS.Trt_F |
| WDR47     | 0.97287 | -0.4957 | 0.231 | 0.23 | 1 | HC_vs_MS.Trt_F |

|            |         |         |       |      |   |                |
|------------|---------|---------|-------|------|---|----------------|
| PRKRA      | 0.97318 | -0.434  | 0.272 | 0.26 | 1 | HC_vs_MS.Trt_F |
| CBFB       | 0.97326 | -0.2962 | 0.182 | 0.17 | 1 | HC_vs_MS.Trt_F |
| GORASP2    | 0.97357 | -0.4944 | 0.228 | 0.22 | 1 | HC_vs_MS.Trt_F |
| TXNDC9     | 0.97396 | -0.5191 | 0.142 | 0.14 | 1 | HC_vs_MS.Trt_F |
| RTEL1      | 0.97398 | 1.1277  | 0.116 | 0.12 | 1 | HC_vs_MS.Trt_F |
| WNT10A     | 0.97431 | 0.72831 | 0.159 | 0.16 | 1 | HC_vs_MS.Trt_F |
| CRNKL1     | 0.97479 | -0.3888 | 0.116 | 0.11 | 1 | HC_vs_MS.Trt_F |
| WDR83      | 0.9749  | 0.50799 | 0.607 | 0.58 | 1 | HC_vs_MS.Trt_F |
| PALB2      | 0.97506 | -1.0918 | 0.254 | 0.24 | 1 | HC_vs_MS.Trt_F |
| ZNF622     | 0.97561 | -0.3708 | 0.147 | 0.14 | 1 | HC_vs_MS.Trt_F |
| RINT1      | 0.97686 | -0.8074 | 0.569 | 0.55 | 1 | HC_vs_MS.Trt_F |
| EXOC5      | 0.9769  | -0.2828 | 0.454 | 0.44 | 1 | HC_vs_MS.Trt_F |
| AGPS       | 0.97693 | 0.35687 | 0.162 | 0.16 | 1 | HC_vs_MS.Trt_F |
| CEP135     | 0.97761 | 0.3288  | 0.824 | 0.8  | 1 | HC_vs_MS.Trt_F |
| SEH1L      | 0.97787 | -0.3126 | 0.922 | 0.91 | 1 | HC_vs_MS.Trt_F |
| ZNF317     | 0.97788 | -0.5511 | 0.139 | 0.13 | 1 | HC_vs_MS.Trt_F |
| SPPL3      | 0.97803 | 0.62848 | 0.61  | 0.59 | 1 | HC_vs_MS.Trt_F |
| MRPL36     | 0.97829 | -0.9702 | 0.118 | 0.12 | 1 | HC_vs_MS.Trt_F |
| RP11-599B1 | 0.97895 | -0.2758 | 0.228 | 0.22 | 1 | HC_vs_MS.Trt_F |
| SLC30A7    | 0.97923 | -0.7219 | 0.734 | 0.68 | 1 | HC_vs_MS.Trt_F |
| JOSD2      | 0.97924 | -0.3098 | 0.11  | 0.11 | 1 | HC_vs_MS.Trt_F |
| F2R        | 0.97952 | -0.5655 | 0.578 | 0.56 | 1 | HC_vs_MS.Trt_F |
| VTA1       | 0.98009 | -0.8802 | 0.425 | 0.41 | 1 | HC_vs_MS.Trt_F |
| RGS16      | 0.98015 | 0.39965 | 0.113 | 0.11 | 1 | HC_vs_MS.Trt_F |
| UQCC2      | 0.98028 | -0.6853 | 0.116 | 0.11 | 1 | HC_vs_MS.Trt_F |
| NDUFAF1    | 0.98063 | -0.271  | 0.454 | 0.45 | 1 | HC_vs_MS.Trt_F |
| ZHX2       | 0.98067 | -0.309  | 0.139 | 0.14 | 1 | HC_vs_MS.Trt_F |
| C9orf64    | 0.98072 | -0.2816 | 0.592 | 0.58 | 1 | HC_vs_MS.Trt_F |
| NOG        | 0.98107 | -1.242  | 0.139 | 0.13 | 1 | HC_vs_MS.Trt_F |
| OTUD7A     | 0.98149 | -0.5398 | 0.159 | 0.16 | 1 | HC_vs_MS.Trt_F |
| PSMA5      | 0.98158 | -0.3483 | 0.303 | 0.3  | 1 | HC_vs_MS.Trt_F |
| CLU        | 0.98242 | -0.437  | 0.561 | 0.55 | 1 | HC_vs_MS.Trt_F |
| SNX3       | 0.98289 | -0.4142 | 0.182 | 0.17 | 1 | HC_vs_MS.Trt_F |
| PDCD6      | 0.98334 | -0.5088 | 0.725 | 0.67 | 1 | HC_vs_MS.Trt_F |
| MAMLD1     | 0.98361 | -0.4984 | 0.194 | 0.19 | 1 | HC_vs_MS.Trt_F |
| MRPS14     | 0.98405 | -0.5553 | 0.176 | 0.17 | 1 | HC_vs_MS.Trt_F |
| EPPK1      | 0.98432 | 0.2544  | 0.101 | 0.1  | 1 | HC_vs_MS.Trt_F |
| ATG16L1    | 0.98438 | -0.5101 | 0.179 | 0.17 | 1 | HC_vs_MS.Trt_F |
| SHTN1      | 0.98475 | -1.3596 | 0.118 | 0.12 | 1 | HC_vs_MS.Trt_F |
| PRKCE      | 0.98479 | 0.98863 | 0.171 | 0.17 | 1 | HC_vs_MS.Trt_F |

|             |         |         |       |      |   |                |
|-------------|---------|---------|-------|------|---|----------------|
| MMACHC      | 0.98536 | 0.38122 | 0.916 | 0.91 | 1 | HC_vs_MS.Trt_F |
| BSCL2       | 0.9855  | 0.466   | 0.202 | 0.2  | 1 | HC_vs_MS.Trt_F |
| ZNF180      | 0.98599 | -1.0478 | 0.355 | 0.35 | 1 | HC_vs_MS.Trt_F |
| MTIF3       | 0.98723 | -0.7356 | 0.24  | 0.22 | 1 | HC_vs_MS.Trt_F |
| TLK1        | 0.98726 | -0.4908 | 0.74  | 0.79 | 1 | HC_vs_MS.Trt_F |
| GCM1        | 0.9874  | -0.7443 | 0.616 | 0.58 | 1 | HC_vs_MS.Trt_F |
| ARSK        | 0.98744 | 0.56991 | 0.604 | 0.59 | 1 | HC_vs_MS.Trt_F |
| ZNF829      | 0.98768 | -0.4211 | 0.896 | 0.88 | 1 | HC_vs_MS.Trt_F |
| CHMP4A      | 0.98784 | -0.6019 | 0.636 | 0.57 | 1 | HC_vs_MS.Trt_F |
| EXOSC1      | 0.98804 | 0.37162 | 0.558 | 0.56 | 1 | HC_vs_MS.Trt_F |
| ZNF69       | 0.98827 | 0.68977 | 0.454 | 0.45 | 1 | HC_vs_MS.Trt_F |
| AP3S1       | 0.98913 | -0.4627 | 0.413 | 0.39 | 1 | HC_vs_MS.Trt_F |
| ZNF264      | 0.9893  | -0.2719 | 0.957 | 0.95 | 1 | HC_vs_MS.Trt_F |
| GF11B       | 0.98941 | 0.37285 | 0.581 | 0.58 | 1 | HC_vs_MS.Trt_F |
| THAP1       | 0.9895  | -1.0989 | 0.104 | 0.1  | 1 | HC_vs_MS.Trt_F |
| ZNF517      | 0.98955 | -0.3311 | 0.431 | 0.44 | 1 | HC_vs_MS.Trt_F |
| MLST8       | 0.9897  | 0.78385 | 0.434 | 0.42 | 1 | HC_vs_MS.Trt_F |
| EVI5L       | 0.99023 | -0.3352 | 0.318 | 0.31 | 1 | HC_vs_MS.Trt_F |
| FAM217B     | 0.99028 | -0.3282 | 0.399 | 0.39 | 1 | HC_vs_MS.Trt_F |
| UBE2Z       | 0.9904  | -0.3441 | 0.286 | 0.29 | 1 | HC_vs_MS.Trt_F |
| FAM200A     | 0.99052 | 1.29135 | 0.246 | 0.24 | 1 | HC_vs_MS.Trt_F |
| GPR107      | 0.9907  | -0.335  | 0.208 | 0.21 | 1 | HC_vs_MS.Trt_F |
| EIF4B       | 0.99082 | -0.3106 | 0.743 | 0.73 | 1 | HC_vs_MS.Trt_F |
| TTI1        | 0.99122 | -0.6904 | 0.249 | 0.23 | 1 | HC_vs_MS.Trt_F |
| KLHDC3      | 0.99131 | -0.4104 | 0.173 | 0.17 | 1 | HC_vs_MS.Trt_F |
| DAPK3       | 0.99159 | -0.4332 | 0.116 | 0.11 | 1 | HC_vs_MS.Trt_F |
| ITIH4       | 0.99161 | -0.5705 | 0.26  | 0.25 | 1 | HC_vs_MS.Trt_F |
| TRMT61B     | 0.9918  | -0.3226 | 0.133 | 0.13 | 1 | HC_vs_MS.Trt_F |
| MSL3        | 0.99183 | -0.9576 | 0.188 | 0.18 | 1 | HC_vs_MS.Trt_F |
| ZSWIM7      | 0.99265 | -0.5043 | 0.824 | 0.78 | 1 | HC_vs_MS.Trt_F |
| XRN2        | 0.9937  | -0.2962 | 0.231 | 0.23 | 1 | HC_vs_MS.Trt_F |
| RP4-583P15  | 0.99424 | 0.43177 | 0.15  | 0.15 | 1 | HC_vs_MS.Trt_F |
| TLR5        | 0.99486 | 0.66237 | 0.636 | 0.62 | 1 | HC_vs_MS.Trt_F |
| ULK2        | 0.99549 | -0.6516 | 0.725 | 0.73 | 1 | HC_vs_MS.Trt_F |
| TCP1        | 0.99583 | -0.5585 | 0.428 | 0.41 | 1 | HC_vs_MS.Trt_F |
| LILRB5      | 0.99589 | 0.51748 | 0.379 | 0.37 | 1 | HC_vs_MS.Trt_F |
| ZNF384      | 0.99593 | -0.2603 | 0.147 | 0.14 | 1 | HC_vs_MS.Trt_F |
| DEAF1       | 0.99744 | 0.60306 | 0.329 | 0.33 | 1 | HC_vs_MS.Trt_F |
| RP11-2C24.9 | 0.99785 | -0.6219 | 0.13  | 0.13 | 1 | HC_vs_MS.Trt_F |
| PPP1R3E     | 0.99788 | 1.42894 | 0.246 | 0.25 | 1 | HC_vs_MS.Trt_F |

|           |          |         |       |      |          |                |
|-----------|----------|---------|-------|------|----------|----------------|
| NQO1      | 0.99796  | -0.5486 | 0.598 | 0.58 | 1        | HC_vs_MS.Trt_F |
| USP28     | 0.99799  | 0.29461 | 0.41  | 0.39 | 1        | HC_vs_MS.Trt_F |
| ZBTB11    | 0.99906  | -0.5324 | 0.529 | 0.53 | 1        | HC_vs_MS.Trt_F |
| GMFB      | 0.99938  | -0.2543 | 0.124 | 0.12 | 1        | HC_vs_MS.Trt_F |
| ZFP30     | 0.99946  | -0.5154 | 0.844 | 0.84 | 1        | HC_vs_MS.Trt_F |
| CEP126    | 0.99964  | 0.27453 | 0.783 | 0.73 | 1        | HC_vs_MS.Trt_F |
| TUBE1     | 0.99981  | -0.4368 | 0.514 | 0.51 | 1        | HC_vs_MS.Trt_F |
| TAC4      | 2.84E-23 | 0.70161 | 0.722 | 0.49 | 4.53E-19 | HC_vs_MS.Trt_B |
| MT-CO2    | 1.25E-22 | -0.8549 | 0.981 | 0.98 | 1.99E-18 | HC_vs_MS.Trt_B |
| SENP7     | 1.58E-21 | 0.42843 | 0.987 | 0.87 | 2.53E-17 | HC_vs_MS.Trt_B |
| PPDPF     | 2.00E-21 | 1.01843 | 0.433 | 0.19 | 3.20E-17 | HC_vs_MS.Trt_B |
| ANKRD30BL | 2.19E-21 | 0.64247 | 0.584 | 0.31 | 3.50E-17 | HC_vs_MS.Trt_B |
| FAM227A   | 1.17E-20 | 0.5069  | 0.909 | 0.74 | 1.87E-16 | HC_vs_MS.Trt_B |
| RPL3      | 1.38E-20 | -0.5348 | 0.977 | 1    | 2.21E-16 | HC_vs_MS.Trt_B |
| SLC35E3   | 1.91E-19 | 0.32053 | 0.999 | 0.98 | 3.05E-15 | HC_vs_MS.Trt_B |
| RASGRP3   | 3.24E-19 | 0.38254 | 0.991 | 0.96 | 5.18E-15 | HC_vs_MS.Trt_B |
| SFT2D2    | 3.17E-18 | 0.32297 | 0.98  | 0.88 | 5.07E-14 | HC_vs_MS.Trt_B |
| PTPN3     | 2.21E-17 | 0.29246 | 0.803 | 0.59 | 3.52E-13 | HC_vs_MS.Trt_B |
| C4orf36   | 3.01E-17 | 0.47991 | 0.838 | 0.64 | 4.80E-13 | HC_vs_MS.Trt_B |
| LRRC57    | 5.43E-17 | 0.26916 | 0.97  | 0.9  | 8.67E-13 | HC_vs_MS.Trt_B |
| CYSLTR1   | 6.28E-17 | 0.43061 | 0.946 | 0.81 | 1.00E-12 | HC_vs_MS.Trt_B |
| MGAT4C    | 7.38E-17 | 0.4914  | 0.777 | 0.58 | 1.18E-12 | HC_vs_MS.Trt_B |
| MORC4     | 7.94E-17 | 0.3162  | 0.991 | 0.95 | 1.27E-12 | HC_vs_MS.Trt_B |
| ITGB3BP   | 8.73E-17 | 0.51959 | 0.784 | 0.59 | 1.39E-12 | HC_vs_MS.Trt_B |
| ZNF283    | 8.77E-17 | 0.37171 | 0.984 | 0.95 | 1.40E-12 | HC_vs_MS.Trt_B |
| ACOT9     | 8.96E-17 | 1.04822 | 0.929 | 0.8  | 1.43E-12 | HC_vs_MS.Trt_B |
| TMSB4X    | 1.59E-16 | -0.359  | 0.993 | 0.99 | 2.54E-12 | HC_vs_MS.Trt_B |
| SAMD12    | 2.74E-16 | 0.37605 | 0.972 | 0.87 | 4.37E-12 | HC_vs_MS.Trt_B |
| C5AR2     | 3.16E-16 | 0.33969 | 0.941 | 0.85 | 5.05E-12 | HC_vs_MS.Trt_B |
| CACNA1A   | 5.76E-16 | 0.32439 | 1     | 0.99 | 9.20E-12 | HC_vs_MS.Trt_B |
| RGPD5     | 6.02E-16 | 0.68931 | 0.816 | 0.65 | 9.61E-12 | HC_vs_MS.Trt_B |
| PBX1      | 6.05E-16 | 0.56354 | 0.891 | 0.73 | 9.66E-12 | HC_vs_MS.Trt_B |
| PLPP2     | 6.09E-16 | 0.40308 | 0.891 | 0.75 | 9.72E-12 | HC_vs_MS.Trt_B |
| LPP       | 7.05E-16 | 0.70811 | 0.971 | 0.87 | 1.13E-11 | HC_vs_MS.Trt_B |
| GIGYF2    | 8.28E-16 | 0.58848 | 0.91  | 0.8  | 1.32E-11 | HC_vs_MS.Trt_B |
| ZFP14     | 1.66E-15 | 0.77942 | 0.857 | 0.69 | 2.65E-11 | HC_vs_MS.Trt_B |
| TMEM45A   | 1.71E-15 | 0.27303 | 0.996 | 0.95 | 2.72E-11 | HC_vs_MS.Trt_B |
| RPS14     | 1.93E-15 | -0.7435 | 0.959 | 0.95 | 3.08E-11 | HC_vs_MS.Trt_B |
| NDUFS1    | 2.55E-15 | 0.36875 | 0.952 | 0.83 | 4.07E-11 | HC_vs_MS.Trt_B |
| NUPL2     | 4.67E-15 | 0.42717 | 0.962 | 0.88 | 7.46E-11 | HC_vs_MS.Trt_B |

|          |          |         |       |      |          |                |
|----------|----------|---------|-------|------|----------|----------------|
| SRD5A1   | 5.37E-15 | 0.5226  | 0.701 | 0.47 | 8.58E-11 | HC_vs_MS.Trt_B |
| STARD8   | 5.38E-15 | 0.48656 | 0.69  | 0.49 | 8.60E-11 | HC_vs_MS.Trt_B |
| CHST12   | 5.79E-15 | 0.28461 | 0.99  | 0.96 | 9.25E-11 | HC_vs_MS.Trt_B |
| ZNF844   | 6.55E-15 | 0.41406 | 0.904 | 0.8  | 1.05E-10 | HC_vs_MS.Trt_B |
| ZNF445   | 1.09E-14 | 0.25168 | 0.978 | 0.91 | 1.74E-10 | HC_vs_MS.Trt_B |
| C12orf50 | 1.16E-14 | 0.40759 | 0.893 | 0.77 | 1.86E-10 | HC_vs_MS.Trt_B |
| C4orf32  | 1.55E-14 | 0.28303 | 0.986 | 0.94 | 2.48E-10 | HC_vs_MS.Trt_B |
| ZNF675   | 1.68E-14 | -0.6538 | 0.922 | 0.8  | 2.69E-10 | HC_vs_MS.Trt_B |
| ABI2     | 1.69E-14 | 0.38419 | 0.857 | 0.69 | 2.69E-10 | HC_vs_MS.Trt_B |
| CCDC125  | 2.12E-14 | 0.40569 | 0.936 | 0.8  | 3.39E-10 | HC_vs_MS.Trt_B |
| AKT2     | 2.69E-14 | 0.59721 | 0.946 | 0.88 | 4.29E-10 | HC_vs_MS.Trt_B |
| ZNF382   | 3.01E-14 | 0.48878 | 0.926 | 0.84 | 4.81E-10 | HC_vs_MS.Trt_B |
| FLAD1    | 3.34E-14 | 0.3782  | 0.67  | 0.46 | 5.33E-10 | HC_vs_MS.Trt_B |
| SLFN12L  | 3.36E-14 | 0.34118 | 0.835 | 0.66 | 5.37E-10 | HC_vs_MS.Trt_B |
| EPN1     | 3.71E-14 | 0.42708 | 0.949 | 0.88 | 5.92E-10 | HC_vs_MS.Trt_B |
| TMEM106B | 4.04E-14 | 0.33969 | 0.888 | 0.73 | 6.45E-10 | HC_vs_MS.Trt_B |
| CYP1A2   | 4.06E-14 | 0.43178 | 0.864 | 0.71 | 6.48E-10 | HC_vs_MS.Trt_B |
| FTO      | 4.49E-14 | 0.29945 | 0.99  | 0.95 | 7.17E-10 | HC_vs_MS.Trt_B |
| ITGA11   | 4.55E-14 | 0.47304 | 0.619 | 0.41 | 7.26E-10 | HC_vs_MS.Trt_B |
| EEF2     | 4.70E-14 | 0.43864 | 0.894 | 0.77 | 7.51E-10 | HC_vs_MS.Trt_B |
| WISP2    | 5.33E-14 | 0.44744 | 0.606 | 0.39 | 8.51E-10 | HC_vs_MS.Trt_B |
| CAMK2G   | 5.42E-14 | 0.46275 | 0.641 | 0.4  | 8.65E-10 | HC_vs_MS.Trt_B |
| REL      | 5.59E-14 | 0.45529 | 0.954 | 0.91 | 8.93E-10 | HC_vs_MS.Trt_B |
| SULT1B1  | 6.62E-14 | 0.40282 | 0.959 | 0.85 | 1.06E-09 | HC_vs_MS.Trt_B |
| NPIP4    | 8.21E-14 | 0.39806 | 0.951 | 0.85 | 1.31E-09 | HC_vs_MS.Trt_B |
| NOS1     | 9.60E-14 | 0.36716 | 0.719 | 0.52 | 1.53E-09 | HC_vs_MS.Trt_B |
| CATSPERG | 1.02E-13 | 0.28272 | 0.893 | 0.77 | 1.63E-09 | HC_vs_MS.Trt_B |
| TBC1D8B  | 1.45E-13 | 0.26694 | 0.957 | 0.81 | 2.32E-09 | HC_vs_MS.Trt_B |
| LILRA2   | 1.69E-13 | 0.3843  | 0.787 | 0.62 | 2.69E-09 | HC_vs_MS.Trt_B |
| CD151    | 1.79E-13 | 0.34866 | 0.91  | 0.77 | 2.86E-09 | HC_vs_MS.Trt_B |
| KDM2A    | 2.02E-13 | 0.427   | 0.907 | 0.78 | 3.22E-09 | HC_vs_MS.Trt_B |
| RAB12    | 2.11E-13 | 2.45134 | 0.362 | 0.2  | 3.37E-09 | HC_vs_MS.Trt_B |
| UVSSA    | 2.44E-13 | 1.00119 | 0.746 | 0.54 | 3.89E-09 | HC_vs_MS.Trt_B |
| GCNT3    | 2.60E-13 | 0.40893 | 0.877 | 0.74 | 4.15E-09 | HC_vs_MS.Trt_B |
| FBXL18   | 2.77E-13 | 0.41215 | 0.984 | 0.92 | 4.42E-09 | HC_vs_MS.Trt_B |
| IKZF3    | 2.92E-13 | 0.38345 | 0.972 | 0.86 | 4.66E-09 | HC_vs_MS.Trt_B |
| SGK3     | 3.29E-13 | 0.28196 | 0.906 | 0.77 | 5.26E-09 | HC_vs_MS.Trt_B |
| FAM131A  | 3.51E-13 | 0.68253 | 0.806 | 0.6  | 5.60E-09 | HC_vs_MS.Trt_B |
| ZNF396   | 3.88E-13 | 0.4256  | 0.867 | 0.68 | 6.20E-09 | HC_vs_MS.Trt_B |
| P3H1     | 3.94E-13 | 0.65601 | 0.945 | 0.83 | 6.30E-09 | HC_vs_MS.Trt_B |



|          |          |         |       |      |          |                |
|----------|----------|---------|-------|------|----------|----------------|
| DTWD2    | 4.13E-13 | 0.59684 | 0.743 | 0.56 | 6.59E-09 | HC_vs_MS.Trt_B |
| ZNF785   | 4.13E-13 | 0.66234 | 0.906 | 0.77 | 6.59E-09 | HC_vs_MS.Trt_B |
| CLPB     | 4.46E-13 | 0.33977 | 0.957 | 0.88 | 7.13E-09 | HC_vs_MS.Trt_B |
| PRPF3    | 4.80E-13 | 0.55896 | 0.859 | 0.74 | 7.66E-09 | HC_vs_MS.Trt_B |
| TTC5     | 5.35E-13 | 0.67542 | 0.601 | 0.41 | 8.55E-09 | HC_vs_MS.Trt_B |
| CHFR     | 6.51E-13 | 0.32847 | 0.936 | 0.82 | 1.04E-08 | HC_vs_MS.Trt_B |
| LGMN     | 6.85E-13 | 0.68621 | 0.958 | 0.9  | 1.09E-08 | HC_vs_MS.Trt_B |
| CFAP54   | 7.22E-13 | 0.30469 | 0.939 | 0.8  | 1.15E-08 | HC_vs_MS.Trt_B |
| C5AR1    | 7.41E-13 | 0.32733 | 0.959 | 0.85 | 1.18E-08 | HC_vs_MS.Trt_B |
| LETMD1   | 7.43E-13 | 0.32523 | 0.838 | 0.67 | 1.19E-08 | HC_vs_MS.Trt_B |
| AACS     | 7.67E-13 | 0.3909  | 0.986 | 0.93 | 1.23E-08 | HC_vs_MS.Trt_B |
| FAM83F   | 9.08E-13 | 0.377   | 0.87  | 0.73 | 1.45E-08 | HC_vs_MS.Trt_B |
| TMEM41B  | 9.69E-13 | 0.672   | 0.806 | 0.66 | 1.55E-08 | HC_vs_MS.Trt_B |
| EP300    | 9.84E-13 | 0.31649 | 0.707 | 0.51 | 1.57E-08 | HC_vs_MS.Trt_B |
| ZNF567   | 9.93E-13 | 0.45958 | 0.868 | 0.69 | 1.59E-08 | HC_vs_MS.Trt_B |
| HELB     | 1.03E-12 | 0.50959 | 0.899 | 0.77 | 1.64E-08 | HC_vs_MS.Trt_B |
| SLC25A16 | 1.14E-12 | 0.33514 | 0.957 | 0.89 | 1.82E-08 | HC_vs_MS.Trt_B |
| RPL37A   | 1.18E-12 | 0.30932 | 0.817 | 0.6  | 1.89E-08 | HC_vs_MS.Trt_B |
| MRI1     | 1.30E-12 | 0.65951 | 0.719 | 0.57 | 2.07E-08 | HC_vs_MS.Trt_B |
| ASB18    | 1.73E-12 | 0.52574 | 0.567 | 0.38 | 2.77E-08 | HC_vs_MS.Trt_B |
| FLYWCH1  | 1.75E-12 | 0.44186 | 0.787 | 0.58 | 2.79E-08 | HC_vs_MS.Trt_B |
| PHLDB1   | 1.75E-12 | 0.34603 | 0.942 | 0.88 | 2.80E-08 | HC_vs_MS.Trt_B |
| TRIM22   | 1.83E-12 | 0.3106  | 0.951 | 0.8  | 2.92E-08 | HC_vs_MS.Trt_B |
| SMCHD1   | 1.85E-12 | 0.33481 | 0.778 | 0.58 | 2.95E-08 | HC_vs_MS.Trt_B |
| ZNF329   | 1.85E-12 | 0.26326 | 0.716 | 0.56 | 2.96E-08 | HC_vs_MS.Trt_B |
| TOR3A    | 2.05E-12 | 0.51416 | 0.828 | 0.72 | 3.27E-08 | HC_vs_MS.Trt_B |
| MLLT6    | 2.81E-12 | 0.5214  | 0.91  | 0.82 | 4.48E-08 | HC_vs_MS.Trt_B |
| NPLOC4   | 2.85E-12 | 0.34253 | 0.952 | 0.85 | 4.55E-08 | HC_vs_MS.Trt_B |
| SHISA9   | 2.90E-12 | 0.31    | 0.925 | 0.83 | 4.64E-08 | HC_vs_MS.Trt_B |
| MARVELD3 | 3.17E-12 | 0.31661 | 0.867 | 0.72 | 5.07E-08 | HC_vs_MS.Trt_B |
| COQ4     | 3.18E-12 | 0.30155 | 0.894 | 0.76 | 5.07E-08 | HC_vs_MS.Trt_B |
| MPV17L   | 3.35E-12 | 0.32396 | 0.975 | 0.93 | 5.36E-08 | HC_vs_MS.Trt_B |
| PAK2     | 3.38E-12 | 0.30091 | 0.745 | 0.54 | 5.40E-08 | HC_vs_MS.Trt_B |
| DSTYK    | 3.40E-12 | 0.79459 | 0.816 | 0.66 | 5.42E-08 | HC_vs_MS.Trt_B |
| ZFP36L2  | 3.58E-12 | 0.50791 | 0.533 | 0.33 | 5.72E-08 | HC_vs_MS.Trt_B |
| TMEM212  | 3.76E-12 | 0.31425 | 0.942 | 0.83 | 6.01E-08 | HC_vs_MS.Trt_B |
| RNF115   | 3.86E-12 | 0.32852 | 0.964 | 0.87 | 6.17E-08 | HC_vs_MS.Trt_B |
| QPRT     | 4.48E-12 | 0.33988 | 0.92  | 0.81 | 7.15E-08 | HC_vs_MS.Trt_B |
| DAGLB    | 4.88E-12 | 0.37412 | 0.828 | 0.65 | 7.79E-08 | HC_vs_MS.Trt_B |
| FAM122C  | 6.11E-12 | 0.33358 | 0.901 | 0.8  | 9.76E-08 | HC_vs_MS.Trt_B |

|         |          |         |       |      |          |                |
|---------|----------|---------|-------|------|----------|----------------|
| BAG6    | 6.25E-12 | 0.29383 | 0.622 | 0.44 | 9.99E-08 | HC_vs_MS.Trt_B |
| IQCC    | 6.36E-12 | -0.4099 | 0.655 | 0.43 | 1.02E-07 | HC_vs_MS.Trt_B |
| CNKSR3  | 6.52E-12 | 0.29572 | 0.975 | 0.92 | 1.04E-07 | HC_vs_MS.Trt_B |
| FAXDC2  | 6.59E-12 | 0.5812  | 0.839 | 0.71 | 1.05E-07 | HC_vs_MS.Trt_B |
| NAE1    | 6.63E-12 | 0.27003 | 0.761 | 0.57 | 1.06E-07 | HC_vs_MS.Trt_B |
| ALDH7A1 | 7.29E-12 | 0.33143 | 0.991 | 0.94 | 1.16E-07 | HC_vs_MS.Trt_B |
| LRCH3   | 7.32E-12 | 0.51112 | 0.97  | 0.92 | 1.17E-07 | HC_vs_MS.Trt_B |
| CEP112  | 7.71E-12 | 0.31935 | 0.933 | 0.83 | 1.23E-07 | HC_vs_MS.Trt_B |
| SUPV3L1 | 8.04E-12 | 0.26465 | 0.688 | 0.49 | 1.28E-07 | HC_vs_MS.Trt_B |
| ALG9    | 8.04E-12 | 0.51026 | 0.875 | 0.71 | 1.28E-07 | HC_vs_MS.Trt_B |
| NUCB2   | 8.79E-12 | 0.28784 | 0.971 | 0.89 | 1.40E-07 | HC_vs_MS.Trt_B |
| NUPR1   | 8.89E-12 | 0.27365 | 0.941 | 0.86 | 1.42E-07 | HC_vs_MS.Trt_B |
| NARF    | 8.98E-12 | 0.32901 | 0.959 | 0.87 | 1.43E-07 | HC_vs_MS.Trt_B |
| TXNDC15 | 8.98E-12 | 0.4881  | 0.687 | 0.51 | 1.43E-07 | HC_vs_MS.Trt_B |
| FLRT2   | 9.38E-12 | 0.35452 | 0.92  | 0.85 | 1.50E-07 | HC_vs_MS.Trt_B |
| ZNF26   | 1.00E-11 | 0.29471 | 0.996 | 0.95 | 1.60E-07 | HC_vs_MS.Trt_B |
| CRLF3   | 1.01E-11 | 0.4532  | 0.933 | 0.78 | 1.61E-07 | HC_vs_MS.Trt_B |
| FKBP14  | 1.01E-11 | 0.54696 | 0.629 | 0.44 | 1.62E-07 | HC_vs_MS.Trt_B |
| FUT2    | 1.05E-11 | 0.41232 | 0.741 | 0.56 | 1.68E-07 | HC_vs_MS.Trt_B |
| LYN     | 1.15E-11 | 0.29119 | 0.587 | 0.39 | 1.84E-07 | HC_vs_MS.Trt_B |
| AP1S3   | 1.31E-11 | 0.36371 | 0.904 | 0.79 | 2.10E-07 | HC_vs_MS.Trt_B |
| PSMA6   | 1.44E-11 | 0.27605 | 0.93  | 0.78 | 2.29E-07 | HC_vs_MS.Trt_B |
| CORO7   | 1.49E-11 | 0.3442  | 0.858 | 0.7  | 2.38E-07 | HC_vs_MS.Trt_B |
| C1orf56 | 1.57E-11 | -0.8451 | 0.872 | 0.91 | 2.51E-07 | HC_vs_MS.Trt_B |
| NPIP5   | 1.59E-11 | 0.30751 | 0.926 | 0.78 | 2.54E-07 | HC_vs_MS.Trt_B |
| NCBP3   | 1.73E-11 | 0.38908 | 0.877 | 0.73 | 2.77E-07 | HC_vs_MS.Trt_B |
| NDRG2   | 1.76E-11 | 0.27828 | 0.851 | 0.72 | 2.81E-07 | HC_vs_MS.Trt_B |
| ATP10B  | 1.84E-11 | 0.41366 | 0.716 | 0.54 | 2.94E-07 | HC_vs_MS.Trt_B |
| RPL7    | 1.97E-11 | -0.4567 | 0.926 | 0.9  | 3.15E-07 | HC_vs_MS.Trt_B |
| GTSE1   | 1.99E-11 | 0.29916 | 0.568 | 0.36 | 3.18E-07 | HC_vs_MS.Trt_B |
| MYLK3   | 2.00E-11 | 0.27858 | 0.922 | 0.81 | 3.19E-07 | HC_vs_MS.Trt_B |
| FECH    | 2.00E-11 | 0.5834  | 0.696 | 0.51 | 3.20E-07 | HC_vs_MS.Trt_B |
| ARL17A  | 2.03E-11 | 0.76624 | 0.691 | 0.5  | 3.24E-07 | HC_vs_MS.Trt_B |
| TMEM181 | 2.15E-11 | 0.30231 | 0.504 | 0.29 | 3.44E-07 | HC_vs_MS.Trt_B |
| CNR2    | 2.22E-11 | 0.40606 | 0.799 | 0.65 | 3.55E-07 | HC_vs_MS.Trt_B |
| OPA3    | 2.22E-11 | 0.51739 | 0.978 | 0.9  | 3.55E-07 | HC_vs_MS.Trt_B |
| TMEM63A | 2.52E-11 | 0.42117 | 0.784 | 0.6  | 4.03E-07 | HC_vs_MS.Trt_B |
| SZT2    | 2.72E-11 | 0.5528  | 0.849 | 0.68 | 4.34E-07 | HC_vs_MS.Trt_B |
| SWSAP1  | 2.90E-11 | 0.28038 | 0.72  | 0.56 | 4.63E-07 | HC_vs_MS.Trt_B |
| FAM63B  | 2.91E-11 | 0.90374 | 0.796 | 0.62 | 4.65E-07 | HC_vs_MS.Trt_B |

|            |          |         |       |      |          |                |
|------------|----------|---------|-------|------|----------|----------------|
| PRELP      | 2.94E-11 | 0.25282 | 0.738 | 0.53 | 4.70E-07 | HC_vs_MS.Trt_B |
| PLA2G7     | 3.06E-11 | 0.82743 | 0.594 | 0.41 | 4.89E-07 | HC_vs_MS.Trt_B |
| EMC1       | 3.14E-11 | 0.5723  | 0.814 | 0.65 | 5.02E-07 | HC_vs_MS.Trt_B |
| TTYH1      | 3.20E-11 | -0.316  | 0.625 | 0.45 | 5.10E-07 | HC_vs_MS.Trt_B |
| RGPD6      | 3.73E-11 | 0.4908  | 0.588 | 0.38 | 5.97E-07 | HC_vs_MS.Trt_B |
| HOOK3      | 3.84E-11 | 0.55239 | 0.935 | 0.85 | 6.14E-07 | HC_vs_MS.Trt_B |
| CLN5       | 3.92E-11 | 0.25877 | 0.962 | 0.86 | 6.26E-07 | HC_vs_MS.Trt_B |
| CLSPN      | 3.97E-11 | 0.29409 | 0.854 | 0.72 | 6.34E-07 | HC_vs_MS.Trt_B |
| MED28      | 4.10E-11 | 0.50825 | 0.855 | 0.74 | 6.55E-07 | HC_vs_MS.Trt_B |
| PKNOX1     | 4.24E-11 | 0.3171  | 0.77  | 0.63 | 6.78E-07 | HC_vs_MS.Trt_B |
| FFAR2      | 4.31E-11 | 0.28135 | 0.758 | 0.59 | 6.88E-07 | HC_vs_MS.Trt_B |
| WTIP       | 4.35E-11 | 0.32256 | 0.964 | 0.9  | 6.95E-07 | HC_vs_MS.Trt_B |
| SIGLEC10   | 4.41E-11 | 0.46871 | 0.623 | 0.44 | 7.05E-07 | HC_vs_MS.Trt_B |
| C10orf11   | 4.56E-11 | 0.33189 | 0.959 | 0.9  | 7.29E-07 | HC_vs_MS.Trt_B |
| KIFC3      | 4.74E-11 | 0.3274  | 0.67  | 0.47 | 7.57E-07 | HC_vs_MS.Trt_B |
| RPL34      | 4.78E-11 | -0.6912 | 0.958 | 0.94 | 7.63E-07 | HC_vs_MS.Trt_B |
| HINFP      | 4.82E-11 | 0.47535 | 0.99  | 0.95 | 7.71E-07 | HC_vs_MS.Trt_B |
| PCDHA4     | 4.93E-11 | 0.40003 | 0.904 | 0.79 | 7.87E-07 | HC_vs_MS.Trt_B |
| ZNF891     | 5.02E-11 | 0.4102  | 0.958 | 0.88 | 8.01E-07 | HC_vs_MS.Trt_B |
| TARSL2     | 5.05E-11 | 0.34928 | 0.97  | 0.89 | 8.06E-07 | HC_vs_MS.Trt_B |
| FAM213A    | 5.05E-11 | 0.47431 | 0.807 | 0.64 | 8.06E-07 | HC_vs_MS.Trt_B |
| STRBP      | 5.15E-11 | 0.53205 | 0.63  | 0.45 | 8.22E-07 | HC_vs_MS.Trt_B |
| IRF1       | 5.34E-11 | 0.45566 | 0.888 | 0.79 | 8.53E-07 | HC_vs_MS.Trt_B |
| P2RX5-TAX1 | 5.40E-11 | 0.40819 | 0.857 | 0.71 | 8.63E-07 | HC_vs_MS.Trt_B |
| SIK2       | 5.95E-11 | 0.38443 | 0.684 | 0.53 | 9.50E-07 | HC_vs_MS.Trt_B |
| CES3       | 6.15E-11 | 0.52121 | 0.309 | 0.14 | 9.82E-07 | HC_vs_MS.Trt_B |
| TRDMT1     | 6.41E-11 | 0.37371 | 0.726 | 0.54 | 1.02E-06 | HC_vs_MS.Trt_B |
| EIF1AY     | 6.49E-11 | 0.50705 | 0.609 | 0.45 | 1.04E-06 | HC_vs_MS.Trt_B |
| LRRC37A3   | 6.68E-11 | 1.01862 | 0.528 | 0.36 | 1.07E-06 | HC_vs_MS.Trt_B |
| ZNF829     | 6.88E-11 | 0.37001 | 0.877 | 0.76 | 1.10E-06 | HC_vs_MS.Trt_B |
| ZNF37A     | 7.02E-11 | 0.38727 | 0.874 | 0.75 | 1.12E-06 | HC_vs_MS.Trt_B |
| ATCAY      | 7.40E-11 | 0.31277 | 0.897 | 0.8  | 1.18E-06 | HC_vs_MS.Trt_B |
| HFE        | 7.42E-11 | 0.36275 | 0.683 | 0.5  | 1.19E-06 | HC_vs_MS.Trt_B |
| CHAF1B     | 7.61E-11 | 0.35715 | 0.932 | 0.8  | 1.22E-06 | HC_vs_MS.Trt_B |
| PCDHB1     | 8.59E-11 | 0.34247 | 0.778 | 0.66 | 1.37E-06 | HC_vs_MS.Trt_B |
| ZNF496     | 9.27E-11 | 0.26686 | 0.681 | 0.48 | 1.48E-06 | HC_vs_MS.Trt_B |
| GTF2IRD2   | 9.31E-11 | 0.3442  | 0.954 | 0.86 | 1.49E-06 | HC_vs_MS.Trt_B |
| CPAMD8     | 9.48E-11 | 0.33672 | 0.699 | 0.51 | 1.51E-06 | HC_vs_MS.Trt_B |
| APBA3      | 9.68E-11 | 0.26877 | 0.746 | 0.56 | 1.55E-06 | HC_vs_MS.Trt_B |
| TAOK1      | 9.74E-11 | 0.79119 | 0.906 | 0.81 | 1.56E-06 | HC_vs_MS.Trt_B |

|            |          |         |       |      |          |                |
|------------|----------|---------|-------|------|----------|----------------|
| C16orf87   | 9.90E-11 | 0.36758 | 0.761 | 0.63 | 1.58E-06 | HC_vs_MS.Trt_B |
| SAR1A      | 9.93E-11 | 0.30197 | 0.709 | 0.54 | 1.59E-06 | HC_vs_MS.Trt_B |
| PCSK1N     | 9.94E-11 | 0.43862 | 0.372 | 0.2  | 1.59E-06 | HC_vs_MS.Trt_B |
| RPS19      | 1.00E-10 | -0.6042 | 0.933 | 0.91 | 1.60E-06 | HC_vs_MS.Trt_B |
| RHOH       | 1.02E-10 | 0.40501 | 0.861 | 0.72 | 1.63E-06 | HC_vs_MS.Trt_B |
| SYT5       | 1.10E-10 | 0.3884  | 0.696 | 0.54 | 1.76E-06 | HC_vs_MS.Trt_B |
| ZNF431     | 1.16E-10 | 0.31136 | 0.987 | 0.94 | 1.85E-06 | HC_vs_MS.Trt_B |
| ANKLE2     | 1.18E-10 | 0.30513 | 0.984 | 0.95 | 1.88E-06 | HC_vs_MS.Trt_B |
| ARHGAP8    | 1.26E-10 | 0.3244  | 0.741 | 0.55 | 2.01E-06 | HC_vs_MS.Trt_B |
| TSPAN14    | 1.32E-10 | 0.27612 | 0.972 | 0.91 | 2.11E-06 | HC_vs_MS.Trt_B |
| KLF3       | 1.34E-10 | 0.32788 | 0.639 | 0.46 | 2.15E-06 | HC_vs_MS.Trt_B |
| DACT3      | 1.36E-10 | 0.26389 | 0.955 | 0.91 | 2.17E-06 | HC_vs_MS.Trt_B |
| RBMS2      | 1.36E-10 | 0.38947 | 0.861 | 0.73 | 2.17E-06 | HC_vs_MS.Trt_B |
| ZC3H12D    | 1.39E-10 | 0.35725 | 0.812 | 0.65 | 2.22E-06 | HC_vs_MS.Trt_B |
| BCL11B     | 1.40E-10 | 0.41986 | 0.493 | 0.29 | 2.24E-06 | HC_vs_MS.Trt_B |
| GGA2       | 1.43E-10 | 0.45851 | 0.658 | 0.48 | 2.28E-06 | HC_vs_MS.Trt_B |
| LCTL       | 1.47E-10 | 0.3498  | 0.606 | 0.44 | 2.34E-06 | HC_vs_MS.Trt_B |
| AP006285.1 | 1.47E-10 | 0.26907 | 0.791 | 0.63 | 2.35E-06 | HC_vs_MS.Trt_B |
| EIF2AK2    | 1.52E-10 | 0.63583 | 0.825 | 0.68 | 2.43E-06 | HC_vs_MS.Trt_B |
| MOCS3      | 1.52E-10 | 0.27521 | 0.822 | 0.69 | 2.43E-06 | HC_vs_MS.Trt_B |
| ARPIN      | 1.59E-10 | 0.34151 | 0.87  | 0.76 | 2.53E-06 | HC_vs_MS.Trt_B |
| ARID1B     | 1.64E-10 | 0.34458 | 0.946 | 0.86 | 2.63E-06 | HC_vs_MS.Trt_B |
| EXPH5      | 1.65E-10 | 0.35482 | 0.7   | 0.56 | 2.64E-06 | HC_vs_MS.Trt_B |
| ZNF200     | 1.75E-10 | 0.38928 | 0.774 | 0.63 | 2.79E-06 | HC_vs_MS.Trt_B |
| SCAP       | 1.78E-10 | 0.54301 | 0.617 | 0.43 | 2.84E-06 | HC_vs_MS.Trt_B |
| LRIG2      | 1.78E-10 | 0.28175 | 0.912 | 0.83 | 2.85E-06 | HC_vs_MS.Trt_B |
| SH3GL1     | 1.81E-10 | 0.56933 | 0.759 | 0.63 | 2.89E-06 | HC_vs_MS.Trt_B |
| CTC-487M23 | 1.82E-10 | 0.4206  | 0.917 | 0.85 | 2.91E-06 | HC_vs_MS.Trt_B |
| LAIR1      | 1.86E-10 | 1.14377 | 0.857 | 0.77 | 2.97E-06 | HC_vs_MS.Trt_B |
| FUT11      | 1.97E-10 | 1.11633 | 0.757 | 0.6  | 3.15E-06 | HC_vs_MS.Trt_B |
| CCZ1B      | 2.00E-10 | 0.59833 | 0.712 | 0.53 | 3.19E-06 | HC_vs_MS.Trt_B |
| SLC13A5    | 2.19E-10 | 0.34419 | 0.746 | 0.56 | 3.50E-06 | HC_vs_MS.Trt_B |
| UBA1       | 2.25E-10 | 0.26727 | 0.762 | 0.61 | 3.60E-06 | HC_vs_MS.Trt_B |
| SEC22C     | 2.40E-10 | 0.58876 | 0.691 | 0.52 | 3.84E-06 | HC_vs_MS.Trt_B |
| MPRIP      | 2.44E-10 | 0.29134 | 0.936 | 0.83 | 3.90E-06 | HC_vs_MS.Trt_B |
| DNAL1      | 2.46E-10 | 0.48696 | 0.919 | 0.82 | 3.93E-06 | HC_vs_MS.Trt_B |
| ZKSCAN3    | 2.46E-10 | 0.69939 | 0.807 | 0.68 | 3.94E-06 | HC_vs_MS.Trt_B |
| ZNF90      | 2.50E-10 | 0.37929 | 0.88  | 0.71 | 4.00E-06 | HC_vs_MS.Trt_B |
| GPR141     | 2.56E-10 | 0.37569 | 0.509 | 0.31 | 4.09E-06 | HC_vs_MS.Trt_B |
| SPN        | 2.66E-10 | 0.41583 | 0.98  | 0.93 | 4.25E-06 | HC_vs_MS.Trt_B |

|         |          |         |       |      |          |                |
|---------|----------|---------|-------|------|----------|----------------|
| EHMT1   | 2.70E-10 | 0.28046 | 0.941 | 0.83 | 4.31E-06 | HC_vs_MS.Trt_B |
| QPCTL   | 2.74E-10 | 0.30275 | 0.742 | 0.6  | 4.38E-06 | HC_vs_MS.Trt_B |
| GLTSCR2 | 2.92E-10 | 0.40086 | 0.849 | 0.73 | 4.66E-06 | HC_vs_MS.Trt_B |
| GNL3L   | 3.03E-10 | 0.33597 | 0.928 | 0.82 | 4.84E-06 | HC_vs_MS.Trt_B |
| EVI5    | 3.05E-10 | 0.39809 | 0.828 | 0.67 | 4.87E-06 | HC_vs_MS.Trt_B |
| SHOX    | 3.24E-10 | 0.3164  | 0.839 | 0.72 | 5.17E-06 | HC_vs_MS.Trt_B |
| HNRNPH1 | 3.29E-10 | -0.7841 | 0.99  | 0.99 | 5.26E-06 | HC_vs_MS.Trt_B |
| INTS1   | 3.30E-10 | 1.27456 | 0.413 | 0.24 | 5.27E-06 | HC_vs_MS.Trt_B |
| GTPBP10 | 3.34E-10 | -0.3083 | 0.787 | 0.65 | 5.33E-06 | HC_vs_MS.Trt_B |
| MRPL3   | 3.37E-10 | 0.45245 | 0.548 | 0.38 | 5.38E-06 | HC_vs_MS.Trt_B |
| POLD4   | 3.40E-10 | 0.25241 | 0.797 | 0.65 | 5.43E-06 | HC_vs_MS.Trt_B |
| PHC3    | 3.42E-10 | 0.30144 | 0.958 | 0.88 | 5.46E-06 | HC_vs_MS.Trt_B |
| DIP2A   | 3.49E-10 | 0.32394 | 0.826 | 0.66 | 5.58E-06 | HC_vs_MS.Trt_B |
| TLDC1   | 3.55E-10 | 0.60361 | 0.762 | 0.59 | 5.67E-06 | HC_vs_MS.Trt_B |
| TBC1D15 | 3.55E-10 | 0.67735 | 0.572 | 0.38 | 5.67E-06 | HC_vs_MS.Trt_B |
| HACD3   | 3.65E-10 | -0.261  | 0.784 | 0.58 | 5.84E-06 | HC_vs_MS.Trt_B |
| ADGRE2  | 3.67E-10 | 0.44147 | 0.757 | 0.59 | 5.86E-06 | HC_vs_MS.Trt_B |
| NDE1    | 3.69E-10 | 0.58033 | 0.717 | 0.53 | 5.89E-06 | HC_vs_MS.Trt_B |
| GFPT1   | 3.77E-10 | 0.96528 | 0.706 | 0.55 | 6.02E-06 | HC_vs_MS.Trt_B |
| KAZN    | 3.79E-10 | 0.35208 | 0.47  | 0.29 | 6.05E-06 | HC_vs_MS.Trt_B |
| SCAI    | 3.90E-10 | 0.25611 | 0.832 | 0.72 | 6.23E-06 | HC_vs_MS.Trt_B |
| TBC1D1  | 4.13E-10 | 0.35298 | 0.616 | 0.43 | 6.60E-06 | HC_vs_MS.Trt_B |
| NT5C2   | 4.31E-10 | 0.55275 | 0.735 | 0.59 | 6.88E-06 | HC_vs_MS.Trt_B |
| PPP2CA  | 4.31E-10 | 0.62455 | 0.691 | 0.56 | 6.89E-06 | HC_vs_MS.Trt_B |
| CA5A    | 4.38E-10 | 0.27361 | 0.977 | 0.92 | 6.99E-06 | HC_vs_MS.Trt_B |
| L3MBTL2 | 4.46E-10 | 0.47234 | 0.783 | 0.6  | 7.13E-06 | HC_vs_MS.Trt_B |
| CDK13   | 4.53E-10 | 0.57912 | 0.825 | 0.73 | 7.23E-06 | HC_vs_MS.Trt_B |
| ABL2    | 4.55E-10 | 0.43541 | 0.787 | 0.57 | 7.26E-06 | HC_vs_MS.Trt_B |
| MED9    | 4.64E-10 | 0.39654 | 0.59  | 0.4  | 7.41E-06 | HC_vs_MS.Trt_B |
| MED18   | 5.28E-10 | 0.52527 | 0.642 | 0.45 | 8.44E-06 | HC_vs_MS.Trt_B |
| CXorf23 | 5.39E-10 | 0.52312 | 0.741 | 0.56 | 8.61E-06 | HC_vs_MS.Trt_B |
| CTRC    | 5.51E-10 | 0.34409 | 0.688 | 0.54 | 8.80E-06 | HC_vs_MS.Trt_B |
| SCRG1   | 5.68E-10 | 0.32593 | 0.714 | 0.57 | 9.07E-06 | HC_vs_MS.Trt_B |
| DDB1    | 5.82E-10 | 0.4127  | 0.901 | 0.76 | 9.29E-06 | HC_vs_MS.Trt_B |
| MT-ND4  | 6.41E-10 | -0.5335 | 0.99  | 0.99 | 1.02E-05 | HC_vs_MS.Trt_B |
| ACTA2   | 6.49E-10 | 0.58878 | 0.638 | 0.48 | 1.04E-05 | HC_vs_MS.Trt_B |
| RNF44   | 6.63E-10 | 0.34583 | 0.37  | 0.22 | 1.06E-05 | HC_vs_MS.Trt_B |
| GPR137C | 6.72E-10 | 0.29761 | 0.599 | 0.43 | 1.07E-05 | HC_vs_MS.Trt_B |
| TMEM138 | 6.87E-10 | 0.29431 | 0.855 | 0.73 | 1.10E-05 | HC_vs_MS.Trt_B |
| CFLAR   | 6.91E-10 | 0.25078 | 1     | 0.99 | 1.10E-05 | HC_vs_MS.Trt_B |

|          |          |         |       |      |          |                |
|----------|----------|---------|-------|------|----------|----------------|
| PRDM7    | 6.97E-10 | 0.38277 | 0.509 | 0.34 | 1.11E-05 | HC_vs_MS.Trt_B |
| CPM      | 7.03E-10 | 0.45952 | 0.803 | 0.64 | 1.12E-05 | HC_vs_MS.Trt_B |
| ARSD     | 7.20E-10 | 0.45691 | 0.822 | 0.68 | 1.15E-05 | HC_vs_MS.Trt_B |
| SMARCC2  | 7.22E-10 | 0.28978 | 0.884 | 0.73 | 1.15E-05 | HC_vs_MS.Trt_B |
| MR1      | 7.29E-10 | 0.30098 | 0.913 | 0.78 | 1.16E-05 | HC_vs_MS.Trt_B |
| CACNB4   | 7.41E-10 | 0.37622 | 0.858 | 0.74 | 1.18E-05 | HC_vs_MS.Trt_B |
| ANKH     | 7.50E-10 | 0.25769 | 0.619 | 0.44 | 1.20E-05 | HC_vs_MS.Trt_B |
| PAAF1    | 7.52E-10 | 0.27889 | 0.949 | 0.87 | 1.20E-05 | HC_vs_MS.Trt_B |
| LIN28A   | 7.54E-10 | 0.26403 | 0.741 | 0.59 | 1.20E-05 | HC_vs_MS.Trt_B |
| TINF2    | 8.09E-10 | 0.50607 | 0.83  | 0.69 | 1.29E-05 | HC_vs_MS.Trt_B |
| NAIP     | 8.22E-10 | 0.8733  | 0.675 | 0.51 | 1.31E-05 | HC_vs_MS.Trt_B |
| NFS1     | 8.32E-10 | 0.46009 | 0.886 | 0.78 | 1.33E-05 | HC_vs_MS.Trt_B |
| MACC1    | 8.35E-10 | 0.41896 | 0.672 | 0.52 | 1.33E-05 | HC_vs_MS.Trt_B |
| DDX6     | 8.40E-10 | 0.29901 | 0.972 | 0.93 | 1.34E-05 | HC_vs_MS.Trt_B |
| SLFN5    | 8.43E-10 | 0.44594 | 0.88  | 0.76 | 1.35E-05 | HC_vs_MS.Trt_B |
| SLC9A7   | 8.43E-10 | 0.41617 | 0.938 | 0.83 | 1.35E-05 | HC_vs_MS.Trt_B |
| MSI2     | 8.54E-10 | 0.45544 | 0.83  | 0.72 | 1.36E-05 | HC_vs_MS.Trt_B |
| IL6R     | 8.84E-10 | 0.32543 | 0.6   | 0.43 | 1.41E-05 | HC_vs_MS.Trt_B |
| PCDHA10  | 8.90E-10 | 0.30418 | 0.538 | 0.36 | 1.42E-05 | HC_vs_MS.Trt_B |
| TEX9     | 9.04E-10 | 0.27422 | 0.752 | 0.57 | 1.44E-05 | HC_vs_MS.Trt_B |
| ZGRF1    | 9.06E-10 | 0.6413  | 0.755 | 0.59 | 1.45E-05 | HC_vs_MS.Trt_B |
| WEE1     | 9.10E-10 | 0.38613 | 0.684 | 0.51 | 1.45E-05 | HC_vs_MS.Trt_B |
| LRRC37B  | 9.26E-10 | 0.58399 | 0.619 | 0.44 | 1.48E-05 | HC_vs_MS.Trt_B |
| GSDMD    | 9.66E-10 | 0.2686  | 0.794 | 0.62 | 1.54E-05 | HC_vs_MS.Trt_B |
| C15orf59 | 9.75E-10 | 0.38553 | 0.654 | 0.5  | 1.56E-05 | HC_vs_MS.Trt_B |
| ADAT1    | 1.01E-09 | 0.45798 | 0.671 | 0.53 | 1.61E-05 | HC_vs_MS.Trt_B |
| KCNK6    | 1.02E-09 | 0.29898 | 0.959 | 0.88 | 1.64E-05 | HC_vs_MS.Trt_B |
| AP4S1    | 1.04E-09 | 0.39958 | 0.93  | 0.85 | 1.66E-05 | HC_vs_MS.Trt_B |
| CSF2RA   | 1.08E-09 | 0.26181 | 0.984 | 0.92 | 1.72E-05 | HC_vs_MS.Trt_B |
| SUN3     | 1.10E-09 | 0.35144 | 0.387 | 0.22 | 1.76E-05 | HC_vs_MS.Trt_B |
| PPARA    | 1.11E-09 | 0.47967 | 0.904 | 0.81 | 1.77E-05 | HC_vs_MS.Trt_B |
| TF       | 1.11E-09 | 0.37677 | 0.888 | 0.8  | 1.78E-05 | HC_vs_MS.Trt_B |
| ADAMTS4  | 1.12E-09 | 0.57733 | 0.896 | 0.76 | 1.79E-05 | HC_vs_MS.Trt_B |
| TMEM170A | 1.12E-09 | 0.80794 | 0.81  | 0.71 | 1.79E-05 | HC_vs_MS.Trt_B |
| PLA2G15  | 1.13E-09 | 0.37665 | 0.78  | 0.63 | 1.81E-05 | HC_vs_MS.Trt_B |
| CXorf38  | 1.14E-09 | 0.63979 | 0.836 | 0.71 | 1.82E-05 | HC_vs_MS.Trt_B |
| ZNF169   | 1.14E-09 | 0.37762 | 0.832 | 0.7  | 1.82E-05 | HC_vs_MS.Trt_B |
| EDRF1    | 1.15E-09 | 0.65402 | 0.626 | 0.44 | 1.84E-05 | HC_vs_MS.Trt_B |
| TRAF3IP2 | 1.17E-09 | 0.78442 | 0.886 | 0.77 | 1.87E-05 | HC_vs_MS.Trt_B |
| HCAR1    | 1.19E-09 | 0.33276 | 0.868 | 0.74 | 1.90E-05 | HC_vs_MS.Trt_B |

|              |          |         |       |      |          |                |
|--------------|----------|---------|-------|------|----------|----------------|
| SLITRK2      | 1.20E-09 | 0.42809 | 0.335 | 0.17 | 1.91E-05 | HC_vs_MS.Trt_B |
| FGD4         | 1.23E-09 | 0.32876 | 0.82  | 0.63 | 1.97E-05 | HC_vs_MS.Trt_B |
| EREG         | 1.24E-09 | -0.7385 | 0.761 | 0.6  | 1.98E-05 | HC_vs_MS.Trt_B |
| RPS26        | 1.25E-09 | -0.412  | 0.661 | 0.68 | 1.99E-05 | HC_vs_MS.Trt_B |
| MYH11        | 1.25E-09 | 0.42805 | 0.917 | 0.85 | 2.00E-05 | HC_vs_MS.Trt_B |
| NICN1        | 1.42E-09 | 0.55216 | 0.77  | 0.6  | 2.26E-05 | HC_vs_MS.Trt_B |
| ATG7         | 1.56E-09 | 0.60292 | 0.561 | 0.36 | 2.50E-05 | HC_vs_MS.Trt_B |
| RAD51C       | 1.57E-09 | 0.33665 | 0.909 | 0.79 | 2.51E-05 | HC_vs_MS.Trt_B |
| GCSAML       | 1.59E-09 | 0.32593 | 0.328 | 0.17 | 2.54E-05 | HC_vs_MS.Trt_B |
| TIAM2        | 1.59E-09 | 0.30243 | 0.799 | 0.64 | 2.54E-05 | HC_vs_MS.Trt_B |
| IFT80        | 1.60E-09 | 0.49827 | 0.765 | 0.63 | 2.56E-05 | HC_vs_MS.Trt_B |
| AP3S2        | 1.63E-09 | 0.32462 | 0.694 | 0.55 | 2.61E-05 | HC_vs_MS.Trt_B |
| SUGT1        | 1.63E-09 | 0.49231 | 0.903 | 0.8  | 2.61E-05 | HC_vs_MS.Trt_B |
| FBXL4        | 1.64E-09 | 1.05214 | 0.554 | 0.39 | 2.63E-05 | HC_vs_MS.Trt_B |
| GADL1        | 1.66E-09 | 0.37092 | 0.622 | 0.46 | 2.65E-05 | HC_vs_MS.Trt_B |
| RP11-47I22.1 | 1.74E-09 | 0.37394 | 0.596 | 0.42 | 2.78E-05 | HC_vs_MS.Trt_B |
| PUS1         | 1.78E-09 | 0.53664 | 0.855 | 0.7  | 2.85E-05 | HC_vs_MS.Trt_B |
| CERCAM       | 1.86E-09 | 0.28205 | 0.981 | 0.94 | 2.97E-05 | HC_vs_MS.Trt_B |
| SLC35E1      | 1.87E-09 | 0.41183 | 0.975 | 0.91 | 2.98E-05 | HC_vs_MS.Trt_B |
| SPATS2L      | 1.87E-09 | 0.51432 | 0.941 | 0.86 | 2.98E-05 | HC_vs_MS.Trt_B |
| P2RX7        | 1.95E-09 | 0.56678 | 0.749 | 0.59 | 3.12E-05 | HC_vs_MS.Trt_B |
| CTCFL        | 1.96E-09 | 0.27399 | 0.825 | 0.68 | 3.12E-05 | HC_vs_MS.Trt_B |
| SPATA6L      | 2.02E-09 | 0.47499 | 0.781 | 0.63 | 3.22E-05 | HC_vs_MS.Trt_B |
| CNOT1        | 2.03E-09 | 0.2756  | 0.806 | 0.64 | 3.24E-05 | HC_vs_MS.Trt_B |
| PAX6         | 2.05E-09 | 0.71289 | 0.397 | 0.24 | 3.27E-05 | HC_vs_MS.Trt_B |
| IPCEF1       | 2.07E-09 | 0.34061 | 0.53  | 0.37 | 3.31E-05 | HC_vs_MS.Trt_B |
| ISG20L2      | 2.09E-09 | 0.26114 | 0.803 | 0.64 | 3.33E-05 | HC_vs_MS.Trt_B |
| BRI3BP       | 2.09E-09 | 0.67615 | 0.846 | 0.69 | 3.34E-05 | HC_vs_MS.Trt_B |
| HSD17B4      | 2.10E-09 | 0.26741 | 0.642 | 0.48 | 3.35E-05 | HC_vs_MS.Trt_B |
| SSTR2        | 2.13E-09 | 0.27775 | 0.91  | 0.82 | 3.41E-05 | HC_vs_MS.Trt_B |
| PTCD3        | 2.14E-09 | 0.32314 | 0.912 | 0.77 | 3.42E-05 | HC_vs_MS.Trt_B |
| ZNF233       | 2.22E-09 | 0.51562 | 0.467 | 0.32 | 3.55E-05 | HC_vs_MS.Trt_B |
| AC004824.1   | 2.23E-09 | 0.31228 | 0.416 | 0.25 | 3.57E-05 | HC_vs_MS.Trt_B |
| TMEM213      | 2.32E-09 | 0.25626 | 0.816 | 0.67 | 3.71E-05 | HC_vs_MS.Trt_B |
| DNASE1       | 2.37E-09 | 0.34115 | 0.9   | 0.8  | 3.78E-05 | HC_vs_MS.Trt_B |
| RPS3A        | 2.39E-09 | -0.3727 | 0.938 | 0.92 | 3.82E-05 | HC_vs_MS.Trt_B |
| TADA2A       | 2.45E-09 | 0.7383  | 0.87  | 0.78 | 3.91E-05 | HC_vs_MS.Trt_B |
| EML1         | 2.50E-09 | 0.31905 | 0.719 | 0.55 | 3.99E-05 | HC_vs_MS.Trt_B |
| TCEANC2      | 2.70E-09 | 0.36426 | 0.881 | 0.75 | 4.32E-05 | HC_vs_MS.Trt_B |
| ACP7         | 2.71E-09 | 0.37095 | 0.472 | 0.31 | 4.33E-05 | HC_vs_MS.Trt_B |

|          |          |         |       |      |          |                |
|----------|----------|---------|-------|------|----------|----------------|
| HIF3A    | 2.72E-09 | 0.31945 | 0.864 | 0.74 | 4.34E-05 | HC_vs_MS.Trt_B |
| APOL6    | 2.76E-09 | 0.77095 | 0.843 | 0.73 | 4.41E-05 | HC_vs_MS.Trt_B |
| LIMS1    | 2.79E-09 | 0.42171 | 0.884 | 0.78 | 4.45E-05 | HC_vs_MS.Trt_B |
| WFDC1    | 2.89E-09 | 0.2812  | 0.79  | 0.65 | 4.62E-05 | HC_vs_MS.Trt_B |
| DYNLT3   | 2.91E-09 | 0.5643  | 0.662 | 0.5  | 4.64E-05 | HC_vs_MS.Trt_B |
| PCNX4    | 2.93E-09 | 0.36218 | 0.877 | 0.75 | 4.67E-05 | HC_vs_MS.Trt_B |
| CDC5L    | 2.95E-09 | 0.39914 | 0.59  | 0.4  | 4.71E-05 | HC_vs_MS.Trt_B |
| LPO      | 2.97E-09 | 0.53247 | 0.61  | 0.46 | 4.74E-05 | HC_vs_MS.Trt_B |
| ANKS4B   | 3.00E-09 | 0.28091 | 0.628 | 0.45 | 4.79E-05 | HC_vs_MS.Trt_B |
| PDS5A    | 3.00E-09 | 0.28649 | 0.754 | 0.59 | 4.79E-05 | HC_vs_MS.Trt_B |
| PIGL     | 3.06E-09 | 0.29817 | 0.674 | 0.5  | 4.89E-05 | HC_vs_MS.Trt_B |
| R3HDM4   | 3.18E-09 | 0.40631 | 0.555 | 0.36 | 5.08E-05 | HC_vs_MS.Trt_B |
| TRIM66   | 3.19E-09 | 0.48861 | 0.493 | 0.32 | 5.10E-05 | HC_vs_MS.Trt_B |
| FAM175A  | 3.31E-09 | 0.28901 | 0.852 | 0.71 | 5.29E-05 | HC_vs_MS.Trt_B |
| MRPS33   | 3.33E-09 | 0.41266 | 0.916 | 0.83 | 5.32E-05 | HC_vs_MS.Trt_B |
| HAUS2    | 3.37E-09 | 0.47167 | 0.794 | 0.67 | 5.38E-05 | HC_vs_MS.Trt_B |
| PRR19    | 3.43E-09 | 0.33685 | 0.693 | 0.54 | 5.47E-05 | HC_vs_MS.Trt_B |
| CYP4F8   | 3.51E-09 | 0.35003 | 0.771 | 0.63 | 5.61E-05 | HC_vs_MS.Trt_B |
| IL17RA   | 3.55E-09 | 0.44716 | 0.652 | 0.5  | 5.66E-05 | HC_vs_MS.Trt_B |
| ZNF385A  | 3.67E-09 | 0.32156 | 0.696 | 0.52 | 5.85E-05 | HC_vs_MS.Trt_B |
| ATP5S    | 3.70E-09 | 0.44066 | 0.888 | 0.79 | 5.91E-05 | HC_vs_MS.Trt_B |
| PCBD2    | 3.75E-09 | 0.47775 | 0.799 | 0.67 | 5.99E-05 | HC_vs_MS.Trt_B |
| HTRA4    | 3.76E-09 | 0.39633 | 0.455 | 0.28 | 6.00E-05 | HC_vs_MS.Trt_B |
| SYT12    | 3.80E-09 | 0.315   | 0.716 | 0.55 | 6.07E-05 | HC_vs_MS.Trt_B |
| MMAB     | 3.83E-09 | -0.251  | 0.664 | 0.47 | 6.11E-05 | HC_vs_MS.Trt_B |
| FILIP1L  | 3.87E-09 | 1.02535 | 0.39  | 0.23 | 6.18E-05 | HC_vs_MS.Trt_B |
| CYP2C19  | 4.08E-09 | 0.35651 | 0.719 | 0.56 | 6.52E-05 | HC_vs_MS.Trt_B |
| CCNI     | 4.11E-09 | 0.28789 | 0.822 | 0.67 | 6.57E-05 | HC_vs_MS.Trt_B |
| LRRC74B  | 4.15E-09 | 0.34298 | 0.748 | 0.59 | 6.63E-05 | HC_vs_MS.Trt_B |
| WDR66    | 4.25E-09 | 0.28946 | 0.948 | 0.89 | 6.78E-05 | HC_vs_MS.Trt_B |
| EFTUD2   | 4.44E-09 | 0.37188 | 0.836 | 0.7  | 7.09E-05 | HC_vs_MS.Trt_B |
| KANSL1   | 4.57E-09 | 0.90522 | 0.707 | 0.56 | 7.29E-05 | HC_vs_MS.Trt_B |
| KCNMB1   | 4.57E-09 | 0.28223 | 0.69  | 0.52 | 7.31E-05 | HC_vs_MS.Trt_B |
| EIF4EBP2 | 4.58E-09 | 0.43931 | 0.628 | 0.45 | 7.31E-05 | HC_vs_MS.Trt_B |
| CAPS2    | 4.60E-09 | 0.45366 | 0.452 | 0.29 | 7.34E-05 | HC_vs_MS.Trt_B |
| INPP5B   | 4.62E-09 | 0.30383 | 0.942 | 0.86 | 7.38E-05 | HC_vs_MS.Trt_B |
| GINS3    | 4.73E-09 | 0.34621 | 0.849 | 0.75 | 7.55E-05 | HC_vs_MS.Trt_B |
| ZNF70    | 4.85E-09 | 0.3413  | 0.829 | 0.71 | 7.74E-05 | HC_vs_MS.Trt_B |
| KLHL6    | 4.85E-09 | 0.62987 | 0.729 | 0.59 | 7.75E-05 | HC_vs_MS.Trt_B |
| DHRX     | 4.94E-09 | 0.27842 | 0.725 | 0.58 | 7.90E-05 | HC_vs_MS.Trt_B |



|         |          |         |       |      |          |                |
|---------|----------|---------|-------|------|----------|----------------|
| RCL1    | 4.98E-09 | 0.6374  | 0.5   | 0.33 | 7.95E-05 | HC_vs_MS.Trt_B |
| SEC63   | 5.07E-09 | 0.26228 | 0.636 | 0.46 | 8.09E-05 | HC_vs_MS.Trt_B |
| DECR2   | 5.10E-09 | 0.58981 | 0.801 | 0.64 | 8.14E-05 | HC_vs_MS.Trt_B |
| ZNFX1   | 5.18E-09 | 0.33062 | 0.814 | 0.65 | 8.28E-05 | HC_vs_MS.Trt_B |
| SPC25   | 5.20E-09 | 0.47635 | 0.677 | 0.52 | 8.31E-05 | HC_vs_MS.Trt_B |
| ZNF724  | 5.26E-09 | 0.54981 | 0.899 | 0.78 | 8.41E-05 | HC_vs_MS.Trt_B |
| FMNL1   | 5.36E-09 | 0.61348 | 0.701 | 0.56 | 8.55E-05 | HC_vs_MS.Trt_B |
| MATN2   | 5.40E-09 | 0.30479 | 0.58  | 0.41 | 8.62E-05 | HC_vs_MS.Trt_B |
| PCDHGA8 | 5.41E-09 | 0.37904 | 0.596 | 0.46 | 8.65E-05 | HC_vs_MS.Trt_B |
| BPTF    | 5.51E-09 | 0.29078 | 0.807 | 0.69 | 8.80E-05 | HC_vs_MS.Trt_B |
| KIF1B   | 5.53E-09 | 0.3575  | 0.788 | 0.66 | 8.84E-05 | HC_vs_MS.Trt_B |
| ARHGEF9 | 5.55E-09 | 0.32144 | 0.571 | 0.42 | 8.86E-05 | HC_vs_MS.Trt_B |
| HKR1    | 5.61E-09 | 0.40313 | 0.967 | 0.9  | 8.96E-05 | HC_vs_MS.Trt_B |
| DFFB    | 5.65E-09 | 0.33376 | 0.807 | 0.66 | 9.02E-05 | HC_vs_MS.Trt_B |
| RGMA    | 5.94E-09 | 0.44222 | 0.652 | 0.49 | 9.48E-05 | HC_vs_MS.Trt_B |
| HTR3B   | 5.95E-09 | 0.28338 | 0.632 | 0.48 | 9.51E-05 | HC_vs_MS.Trt_B |
| ZNF805  | 6.06E-09 | 0.3376  | 0.739 | 0.6  | 9.69E-05 | HC_vs_MS.Trt_B |
| OR52A1  | 6.09E-09 | 0.29754 | 0.749 | 0.63 | 9.73E-05 | HC_vs_MS.Trt_B |
| RPL18A  | 6.47E-09 | -0.4209 | 0.914 | 0.88 | 1.03E-04 | HC_vs_MS.Trt_B |
| OLA1    | 6.51E-09 | 0.43077 | 0.455 | 0.28 | 1.04E-04 | HC_vs_MS.Trt_B |
| SHCBP1  | 6.52E-09 | 0.42873 | 0.707 | 0.55 | 1.04E-04 | HC_vs_MS.Trt_B |
| LYPD5   | 6.56E-09 | 0.33583 | 0.699 | 0.55 | 1.05E-04 | HC_vs_MS.Trt_B |
| METTL8  | 7.01E-09 | 0.49037 | 0.916 | 0.82 | 1.12E-04 | HC_vs_MS.Trt_B |
| SEMA3C  | 7.08E-09 | 0.42225 | 0.662 | 0.5  | 1.13E-04 | HC_vs_MS.Trt_B |
| ZNF549  | 7.27E-09 | 0.51765 | 0.688 | 0.54 | 1.16E-04 | HC_vs_MS.Trt_B |
| MXRA7   | 7.32E-09 | 0.66135 | 0.78  | 0.65 | 1.17E-04 | HC_vs_MS.Trt_B |
| TSEN2   | 7.58E-09 | 0.38794 | 0.881 | 0.74 | 1.21E-04 | HC_vs_MS.Trt_B |
| HACD2   | 7.67E-09 | 0.30894 | 0.939 | 0.83 | 1.23E-04 | HC_vs_MS.Trt_B |
| AFF3    | 7.80E-09 | 0.6136  | 0.748 | 0.6  | 1.25E-04 | HC_vs_MS.Trt_B |
| ALDH3B1 | 8.13E-09 | 0.27524 | 0.735 | 0.57 | 1.30E-04 | HC_vs_MS.Trt_B |
| FBXO22  | 8.13E-09 | -0.4456 | 0.765 | 0.62 | 1.30E-04 | HC_vs_MS.Trt_B |
| DET1    | 8.31E-09 | 0.51787 | 0.536 | 0.36 | 1.33E-04 | HC_vs_MS.Trt_B |
| ZNF141  | 8.47E-09 | 0.5057  | 0.968 | 0.92 | 1.35E-04 | HC_vs_MS.Trt_B |
| ETFDH   | 8.50E-09 | 0.39498 | 0.714 | 0.56 | 1.36E-04 | HC_vs_MS.Trt_B |
| POU5F2  | 8.54E-09 | 0.2562  | 0.678 | 0.51 | 1.36E-04 | HC_vs_MS.Trt_B |
| SKA1    | 8.66E-09 | 0.34993 | 0.677 | 0.52 | 1.38E-04 | HC_vs_MS.Trt_B |
| ADCY7   | 9.28E-09 | 0.41133 | 0.765 | 0.62 | 1.48E-04 | HC_vs_MS.Trt_B |
| GMEB1   | 9.40E-09 | 0.31362 | 0.803 | 0.64 | 1.50E-04 | HC_vs_MS.Trt_B |
| HIF1A   | 9.41E-09 | 0.55308 | 0.914 | 0.8  | 1.50E-04 | HC_vs_MS.Trt_B |
| ZNF3    | 9.77E-09 | 0.41367 | 0.742 | 0.58 | 1.56E-04 | HC_vs_MS.Trt_B |

|            |          |         |       |      |          |                |
|------------|----------|---------|-------|------|----------|----------------|
| SS18       | 1.01E-08 | 0.63631 | 0.596 | 0.43 | 1.61E-04 | HC_vs_MS.Trt_B |
| POU6F1     | 1.03E-08 | 0.79532 | 0.522 | 0.37 | 1.65E-04 | HC_vs_MS.Trt_B |
| ZNF770     | 1.08E-08 | 1.0773  | 0.322 | 0.17 | 1.72E-04 | HC_vs_MS.Trt_B |
| MECOM      | 1.11E-08 | 0.48736 | 0.378 | 0.21 | 0.000178 | HC_vs_MS.Trt_B |
| MAVS       | 1.12E-08 | 0.53571 | 0.935 | 0.84 | 1.79E-04 | HC_vs_MS.Trt_B |
| METTL6     | 1.17E-08 | 0.32573 | 0.878 | 0.78 | 1.88E-04 | HC_vs_MS.Trt_B |
| ABCG8      | 1.18E-08 | 0.25993 | 0.614 | 0.46 | 1.88E-04 | HC_vs_MS.Trt_B |
| ARHGEF39   | 1.19E-08 | 0.91844 | 0.648 | 0.5  | 1.89E-04 | HC_vs_MS.Trt_B |
| PDDC1      | 1.20E-08 | 0.25851 | 0.941 | 0.86 | 1.91E-04 | HC_vs_MS.Trt_B |
| CSTF1      | 1.20E-08 | 0.2829  | 0.771 | 0.65 | 1.91E-04 | HC_vs_MS.Trt_B |
| ORAOV1     | 1.23E-08 | 0.83643 | 0.694 | 0.53 | 1.97E-04 | HC_vs_MS.Trt_B |
| HM13       | 1.28E-08 | 0.45292 | 0.83  | 0.72 | 2.04E-04 | HC_vs_MS.Trt_B |
| CYB561A3   | 1.31E-08 | 0.25447 | 0.981 | 0.93 | 2.09E-04 | HC_vs_MS.Trt_B |
| PCSK5      | 1.32E-08 | -0.3359 | 0.97  | 0.88 | 2.11E-04 | HC_vs_MS.Trt_B |
| AC013461.1 | 1.35E-08 | 0.35714 | 0.81  | 0.67 | 2.16E-04 | HC_vs_MS.Trt_B |
| MED24      | 1.36E-08 | -0.2899 | 0.622 | 0.46 | 2.17E-04 | HC_vs_MS.Trt_B |
| VASP       | 1.37E-08 | 0.91296 | 0.562 | 0.41 | 2.18E-04 | HC_vs_MS.Trt_B |
| RAB3B      | 1.38E-08 | 0.28748 | 0.745 | 0.57 | 2.20E-04 | HC_vs_MS.Trt_B |
| FRRS1L     | 1.41E-08 | 0.26831 | 0.865 | 0.76 | 2.26E-04 | HC_vs_MS.Trt_B |
| FBXO40     | 1.44E-08 | 0.68769 | 0.328 | 0.18 | 2.30E-04 | HC_vs_MS.Trt_B |
| CDKL5      | 1.47E-08 | 0.28551 | 0.932 | 0.82 | 2.35E-04 | HC_vs_MS.Trt_B |
| WIPF2      | 1.48E-08 | 0.67098 | 0.772 | 0.62 | 2.37E-04 | HC_vs_MS.Trt_B |
| SLC4A8     | 1.54E-08 | -0.4494 | 0.88  | 0.78 | 2.46E-04 | HC_vs_MS.Trt_B |
| 6-Sep      | 1.55E-08 | 0.28028 | 0.777 | 0.64 | 2.48E-04 | HC_vs_MS.Trt_B |
| ITGA3      | 1.57E-08 | 0.32482 | 0.754 | 0.6  | 2.50E-04 | HC_vs_MS.Trt_B |
| DISP2      | 1.57E-08 | 0.29721 | 0.913 | 0.83 | 2.50E-04 | HC_vs_MS.Trt_B |
| DIRAS2     | 1.62E-08 | 0.32571 | 0.787 | 0.66 | 2.58E-04 | HC_vs_MS.Trt_B |
| RFTN2      | 1.62E-08 | 0.39395 | 0.68  | 0.55 | 0.000258 | HC_vs_MS.Trt_B |
| PHF20L1    | 1.62E-08 | 0.67321 | 0.651 | 0.51 | 2.59E-04 | HC_vs_MS.Trt_B |
| ZBTB3      | 1.63E-08 | 0.47935 | 0.793 | 0.66 | 2.60E-04 | HC_vs_MS.Trt_B |
| DHFR2      | 1.72E-08 | 0.76331 | 0.59  | 0.42 | 2.75E-04 | HC_vs_MS.Trt_B |
| MTAP       | 1.76E-08 | 0.39581 | 0.732 | 0.55 | 2.82E-04 | HC_vs_MS.Trt_B |
| POLR3A     | 1.77E-08 | 0.30778 | 0.829 | 0.7  | 2.83E-04 | HC_vs_MS.Trt_B |
| BAZ2A      | 1.78E-08 | 0.38516 | 0.665 | 0.5  | 2.84E-04 | HC_vs_MS.Trt_B |
| LSM3       | 1.89E-08 | -0.3179 | 0.588 | 0.42 | 3.02E-04 | HC_vs_MS.Trt_B |
| HSPBAP1    | 1.92E-08 | 0.52712 | 0.5   | 0.33 | 3.06E-04 | HC_vs_MS.Trt_B |
| PAPLN      | 1.93E-08 | 0.67332 | 0.764 | 0.62 | 3.07E-04 | HC_vs_MS.Trt_B |
| RABGAP1L   | 2.00E-08 | 0.63791 | 0.891 | 0.78 | 3.19E-04 | HC_vs_MS.Trt_B |
| C22orf39   | 2.01E-08 | 0.55479 | 0.688 | 0.5  | 3.20E-04 | HC_vs_MS.Trt_B |
| PXMP4      | 2.10E-08 | 0.56964 | 0.816 | 0.74 | 3.35E-04 | HC_vs_MS.Trt_B |

|          |          |         |       |      |          |                |
|----------|----------|---------|-------|------|----------|----------------|
| CREG2    | 2.16E-08 | 0.49628 | 0.677 | 0.55 | 3.46E-04 | HC_vs_MS.Trt_B |
| FKBP5    | 2.18E-08 | 0.47084 | 0.762 | 0.64 | 3.49E-04 | HC_vs_MS.Trt_B |
| P3H4     | 2.22E-08 | 0.31187 | 0.896 | 0.76 | 3.55E-04 | HC_vs_MS.Trt_B |
| C3orf62  | 2.23E-08 | 0.62686 | 0.758 | 0.6  | 3.56E-04 | HC_vs_MS.Trt_B |
| VPS13B   | 2.23E-08 | 0.26382 | 0.735 | 0.57 | 3.56E-04 | HC_vs_MS.Trt_B |
| DCLRE1C  | 2.23E-08 | -0.7008 | 0.681 | 0.51 | 3.57E-04 | HC_vs_MS.Trt_B |
| PTK2     | 2.24E-08 | 0.25168 | 0.948 | 0.83 | 3.57E-04 | HC_vs_MS.Trt_B |
| C15orf57 | 2.25E-08 | 0.97982 | 0.772 | 0.66 | 3.60E-04 | HC_vs_MS.Trt_B |
| HDAC4    | 2.27E-08 | 0.46162 | 0.559 | 0.38 | 3.63E-04 | HC_vs_MS.Trt_B |
| ATM      | 2.29E-08 | 0.25042 | 0.952 | 0.9  | 3.66E-04 | HC_vs_MS.Trt_B |
| RBM28    | 2.36E-08 | 0.5899  | 0.877 | 0.78 | 3.76E-04 | HC_vs_MS.Trt_B |
| CBL      | 2.44E-08 | 0.54444 | 0.609 | 0.46 | 3.90E-04 | HC_vs_MS.Trt_B |
| TMEM156  | 2.47E-08 | -0.5291 | 0.768 | 0.62 | 3.95E-04 | HC_vs_MS.Trt_B |
| MAGI2    | 2.58E-08 | 0.26046 | 0.787 | 0.61 | 4.12E-04 | HC_vs_MS.Trt_B |
| TNKS     | 2.59E-08 | 0.60448 | 0.797 | 0.66 | 4.14E-04 | HC_vs_MS.Trt_B |
| PLPP5    | 2.61E-08 | 0.54888 | 0.848 | 0.71 | 4.16E-04 | HC_vs_MS.Trt_B |
| IMMP1L   | 2.64E-08 | -0.4279 | 0.559 | 0.41 | 4.22E-04 | HC_vs_MS.Trt_B |
| AARSD1   | 2.67E-08 | 0.72042 | 0.678 | 0.54 | 4.26E-04 | HC_vs_MS.Trt_B |
| METTL9   | 2.71E-08 | 0.31273 | 0.601 | 0.43 | 4.32E-04 | HC_vs_MS.Trt_B |
| NAV1     | 2.72E-08 | 0.81139 | 0.845 | 0.75 | 4.34E-04 | HC_vs_MS.Trt_B |
| NHSL2    | 2.77E-08 | -0.3533 | 0.606 | 0.44 | 4.42E-04 | HC_vs_MS.Trt_B |
| TCTA     | 2.79E-08 | 0.28743 | 0.61  | 0.43 | 4.46E-04 | HC_vs_MS.Trt_B |
| ZNF154   | 2.95E-08 | 0.43679 | 0.684 | 0.53 | 4.71E-04 | HC_vs_MS.Trt_B |
| HAUS1    | 2.97E-08 | 0.44035 | 0.635 | 0.46 | 4.75E-04 | HC_vs_MS.Trt_B |
| SNRNP70  | 3.00E-08 | 1.12505 | 0.299 | 0.16 | 4.79E-04 | HC_vs_MS.Trt_B |
| AHSA1    | 3.02E-08 | 0.56109 | 0.541 | 0.39 | 4.82E-04 | HC_vs_MS.Trt_B |
| KIAA2012 | 3.05E-08 | 0.36653 | 0.643 | 0.51 | 4.87E-04 | HC_vs_MS.Trt_B |
| PLEKHB2  | 3.14E-08 | 0.55637 | 0.843 | 0.73 | 5.02E-04 | HC_vs_MS.Trt_B |
| TRIM52   | 3.14E-08 | -0.374  | 0.799 | 0.66 | 5.02E-04 | HC_vs_MS.Trt_B |
| HACE1    | 3.24E-08 | 0.33236 | 0.655 | 0.48 | 5.17E-04 | HC_vs_MS.Trt_B |
| TIMM17B  | 3.26E-08 | -0.4032 | 0.73  | 0.58 | 5.20E-04 | HC_vs_MS.Trt_B |
| SPACA6   | 3.36E-08 | 0.27311 | 0.87  | 0.8  | 5.37E-04 | HC_vs_MS.Trt_B |
| AAMDC    | 3.37E-08 | 0.31123 | 0.899 | 0.83 | 5.38E-04 | HC_vs_MS.Trt_B |
| MCM3AP   | 3.47E-08 | 0.46364 | 0.529 | 0.37 | 5.54E-04 | HC_vs_MS.Trt_B |
| SMYD4    | 3.66E-08 | 0.5426  | 0.833 | 0.67 | 5.85E-04 | HC_vs_MS.Trt_B |
| ZFP36    | 3.68E-08 | 0.68618 | 0.393 | 0.24 | 5.87E-04 | HC_vs_MS.Trt_B |
| TCAF1    | 3.75E-08 | 0.54335 | 0.336 | 0.19 | 6.00E-04 | HC_vs_MS.Trt_B |
| PNPT1    | 3.76E-08 | 0.60149 | 0.855 | 0.77 | 6.00E-04 | HC_vs_MS.Trt_B |
| EYS      | 3.78E-08 | 0.37748 | 0.809 | 0.63 | 6.05E-04 | HC_vs_MS.Trt_B |
| LUZP2    | 3.85E-08 | 0.25486 | 0.393 | 0.24 | 6.15E-04 | HC_vs_MS.Trt_B |

|          |          |         |       |      |          |                |
|----------|----------|---------|-------|------|----------|----------------|
| KAT6A    | 3.91E-08 | 0.66537 | 0.767 | 0.61 | 6.25E-04 | HC_vs_MS.Trt_B |
| ADGRF1   | 4.19E-08 | 0.27522 | 0.775 | 0.62 | 6.70E-04 | HC_vs_MS.Trt_B |
| KLHL36   | 4.31E-08 | 1.016   | 0.636 | 0.49 | 6.89E-04 | HC_vs_MS.Trt_B |
| ZKSCAN5  | 4.38E-08 | 0.33838 | 0.562 | 0.4  | 7.00E-04 | HC_vs_MS.Trt_B |
| TMEM67   | 4.38E-08 | 0.36601 | 0.884 | 0.8  | 7.00E-04 | HC_vs_MS.Trt_B |
| ZNF160   | 4.42E-08 | 0.41415 | 0.593 | 0.42 | 7.05E-04 | HC_vs_MS.Trt_B |
| LTBR     | 4.57E-08 | 0.28701 | 0.929 | 0.82 | 7.30E-04 | HC_vs_MS.Trt_B |
| WBSCR22  | 4.67E-08 | 0.41066 | 0.726 | 0.58 | 7.45E-04 | HC_vs_MS.Trt_B |
| AKAP7    | 4.68E-08 | 0.66517 | 0.5   | 0.35 | 7.47E-04 | HC_vs_MS.Trt_B |
| MICAL2   | 4.75E-08 | 0.41752 | 0.822 | 0.68 | 7.59E-04 | HC_vs_MS.Trt_B |
| SCML4    | 4.97E-08 | 0.37051 | 0.629 | 0.46 | 7.93E-04 | HC_vs_MS.Trt_B |
| UBN2     | 4.98E-08 | 0.74142 | 0.606 | 0.46 | 7.96E-04 | HC_vs_MS.Trt_B |
| SMARCAL1 | 5.00E-08 | 0.45188 | 0.706 | 0.56 | 7.98E-04 | HC_vs_MS.Trt_B |
| ZNF623   | 5.02E-08 | -0.2981 | 0.629 | 0.48 | 8.02E-04 | HC_vs_MS.Trt_B |
| TGM2     | 5.02E-08 | 0.39763 | 0.552 | 0.4  | 8.02E-04 | HC_vs_MS.Trt_B |
| FAM189B  | 5.17E-08 | 0.48923 | 0.69  | 0.56 | 8.26E-04 | HC_vs_MS.Trt_B |
| CDH3     | 5.19E-08 | 0.33703 | 0.846 | 0.75 | 8.29E-04 | HC_vs_MS.Trt_B |
| CYP2B6   | 5.26E-08 | 0.29904 | 0.607 | 0.46 | 8.40E-04 | HC_vs_MS.Trt_B |
| PLEKHG2  | 5.29E-08 | 0.34401 | 0.819 | 0.71 | 8.45E-04 | HC_vs_MS.Trt_B |
| TTC6     | 5.33E-08 | 0.34799 | 0.286 | 0.15 | 8.52E-04 | HC_vs_MS.Trt_B |
| ZFYVE26  | 5.36E-08 | 0.47372 | 0.836 | 0.71 | 8.56E-04 | HC_vs_MS.Trt_B |
| STARD10  | 5.43E-08 | 0.32332 | 0.825 | 0.67 | 8.68E-04 | HC_vs_MS.Trt_B |
| ZNF778   | 5.47E-08 | -1.0824 | 0.654 | 0.5  | 8.73E-04 | HC_vs_MS.Trt_B |
| PTCHD1   | 5.53E-08 | 0.49803 | 0.703 | 0.57 | 8.84E-04 | HC_vs_MS.Trt_B |
| PANK1    | 5.91E-08 | 0.27138 | 0.452 | 0.3  | 9.44E-04 | HC_vs_MS.Trt_B |
| ABHD15   | 5.92E-08 | 1.1551  | 0.329 | 0.18 | 9.46E-04 | HC_vs_MS.Trt_B |
| IRF9     | 5.96E-08 | 0.31762 | 0.891 | 0.76 | 9.52E-04 | HC_vs_MS.Trt_B |
| CYP2C9   | 6.00E-08 | 0.25468 | 0.588 | 0.43 | 9.58E-04 | HC_vs_MS.Trt_B |
| BET1     | 6.11E-08 | 0.43126 | 0.568 | 0.4  | 9.76E-04 | HC_vs_MS.Trt_B |
| SPTSSA   | 6.18E-08 | 0.25419 | 0.401 | 0.24 | 9.88E-04 | HC_vs_MS.Trt_B |
| SH3PXD2A | 6.35E-08 | -0.2802 | 0.314 | 0.17 | 0.001014 | HC_vs_MS.Trt_B |
| ASB6     | 6.37E-08 | 0.8149  | 0.583 | 0.44 | 0.001018 | HC_vs_MS.Trt_B |
| ARHGAP22 | 6.41E-08 | 0.25391 | 0.643 | 0.46 | 0.001023 | HC_vs_MS.Trt_B |
| ZNF568   | 6.48E-08 | 0.42277 | 0.845 | 0.71 | 0.001035 | HC_vs_MS.Trt_B |
| PARP9    | 6.52E-08 | 0.68835 | 0.388 | 0.24 | 0.001041 | HC_vs_MS.Trt_B |
| SSH1     | 6.71E-08 | 0.55707 | 0.846 | 0.72 | 0.001071 | HC_vs_MS.Trt_B |
| PARVB    | 6.72E-08 | 0.50655 | 0.677 | 0.55 | 0.001074 | HC_vs_MS.Trt_B |
| C4BPB    | 6.93E-08 | 0.34072 | 0.78  | 0.65 | 0.001107 | HC_vs_MS.Trt_B |
| ZNF620   | 7.11E-08 | 0.30967 | 0.716 | 0.57 | 0.001135 | HC_vs_MS.Trt_B |
| SLC36A2  | 7.18E-08 | 0.38056 | 0.619 | 0.49 | 0.001147 | HC_vs_MS.Trt_B |

|          |          |         |       |      |          |                |
|----------|----------|---------|-------|------|----------|----------------|
| SLC37A3  | 7.24E-08 | 0.38864 | 0.936 | 0.85 | 0.001157 | HC_vs_MS.Trt_B |
| TNIK     | 7.32E-08 | 1.00165 | 0.4   | 0.26 | 0.00117  | HC_vs_MS.Trt_B |
| PRRG4    | 7.36E-08 | 0.32123 | 0.757 | 0.64 | 0.001176 | HC_vs_MS.Trt_B |
| CALCOCO1 | 7.44E-08 | 0.57591 | 0.497 | 0.34 | 0.001188 | HC_vs_MS.Trt_B |
| ZNF611   | 7.75E-08 | 0.42073 | 0.951 | 0.85 | 0.001238 | HC_vs_MS.Trt_B |
| NWD1     | 7.78E-08 | 0.33957 | 0.487 | 0.34 | 0.001243 | HC_vs_MS.Trt_B |
| CREBBP   | 7.81E-08 | 0.34538 | 0.564 | 0.4  | 0.001247 | HC_vs_MS.Trt_B |
| DENND2C  | 7.96E-08 | 0.33355 | 0.751 | 0.61 | 0.001272 | HC_vs_MS.Trt_B |
| ASNS     | 8.01E-08 | 0.73444 | 0.296 | 0.16 | 0.001279 | HC_vs_MS.Trt_B |
| ARL17B   | 8.04E-08 | 0.26987 | 0.722 | 0.58 | 0.001284 | HC_vs_MS.Trt_B |
| SNUPN    | 8.18E-08 | 0.31648 | 0.843 | 0.71 | 0.001306 | HC_vs_MS.Trt_B |
| MT-ND4L  | 8.29E-08 | -0.5242 | 0.984 | 0.99 | 0.001324 | HC_vs_MS.Trt_B |
| IGSF9    | 8.41E-08 | 0.68689 | 0.304 | 0.17 | 0.001344 | HC_vs_MS.Trt_B |
| WDR12    | 8.44E-08 | -0.393  | 0.883 | 0.79 | 0.001348 | HC_vs_MS.Trt_B |
| STPG1    | 8.47E-08 | 0.34293 | 0.755 | 0.63 | 0.001352 | HC_vs_MS.Trt_B |
| POC1B    | 8.49E-08 | 0.49341 | 0.742 | 0.59 | 0.001356 | HC_vs_MS.Trt_B |
| PPP5D1   | 8.91E-08 | 0.40403 | 0.729 | 0.6  | 0.001423 | HC_vs_MS.Trt_B |
| ST6GAL1  | 8.97E-08 | 0.40158 | 0.462 | 0.31 | 0.001432 | HC_vs_MS.Trt_B |
| TRIM25   | 9.02E-08 | 0.91851 | 0.33  | 0.19 | 0.001441 | HC_vs_MS.Trt_B |
| SMAD4    | 9.25E-08 | 0.26331 | 0.491 | 0.31 | 0.001477 | HC_vs_MS.Trt_B |
| DDX60L   | 9.26E-08 | 0.53774 | 0.714 | 0.56 | 0.001479 | HC_vs_MS.Trt_B |
| ZNF28    | 9.27E-08 | 1.12834 | 0.777 | 0.63 | 0.001481 | HC_vs_MS.Trt_B |
| C10orf67 | 9.61E-08 | 0.67109 | 0.28  | 0.15 | 0.001535 | HC_vs_MS.Trt_B |
| PRKAG1   | 9.73E-08 | 0.33358 | 0.632 | 0.47 | 0.001554 | HC_vs_MS.Trt_B |
| SLC25A44 | 9.73E-08 | 0.29029 | 0.674 | 0.49 | 0.001554 | HC_vs_MS.Trt_B |
| RNF213   | 9.76E-08 | 0.27285 | 0.981 | 0.89 | 0.001559 | HC_vs_MS.Trt_B |
| SCO1     | 9.87E-08 | 0.48064 | 0.775 | 0.66 | 0.001576 | HC_vs_MS.Trt_B |
| PTPRK    | 9.93E-08 | 0.35385 | 0.443 | 0.3  | 0.001587 | HC_vs_MS.Trt_B |
| PPP2R1B  | 1.03E-07 | 0.41095 | 0.409 | 0.27 | 0.001637 | HC_vs_MS.Trt_B |
| CLN8     | 1.03E-07 | 0.52299 | 0.839 | 0.72 | 0.001638 | HC_vs_MS.Trt_B |
| MOSPD2   | 1.03E-07 | 0.28083 | 0.309 | 0.18 | 0.001641 | HC_vs_MS.Trt_B |
| LSM7     | 1.04E-07 | -0.7008 | 0.675 | 0.49 | 0.001656 | HC_vs_MS.Trt_B |
| PHLDB2   | 1.05E-07 | -1.0063 | 0.51  | 0.37 | 0.001685 | HC_vs_MS.Trt_B |
| RGS12    | 1.07E-07 | 0.90491 | 0.823 | 0.68 | 0.001708 | HC_vs_MS.Trt_B |
| SLC43A2  | 1.09E-07 | 0.36633 | 0.786 | 0.63 | 0.001738 | HC_vs_MS.Trt_B |
| ZNF483   | 1.10E-07 | 0.5361  | 0.826 | 0.7  | 0.00175  | HC_vs_MS.Trt_B |
| RNGTT    | 1.10E-07 | 0.69841 | 0.394 | 0.26 | 0.001753 | HC_vs_MS.Trt_B |
| CDK5RAP1 | 1.11E-07 | 0.77434 | 0.384 | 0.25 | 0.001766 | HC_vs_MS.Trt_B |
| EIF4A2   | 1.11E-07 | 0.36201 | 0.554 | 0.4  | 0.001776 | HC_vs_MS.Trt_B |
| SPTLC2   | 1.16E-07 | 0.84392 | 0.697 | 0.59 | 0.001846 | HC_vs_MS.Trt_B |

|          |          |         |       |      |          |                |
|----------|----------|---------|-------|------|----------|----------------|
| HERC1    | 1.18E-07 | -0.2664 | 0.83  | 0.67 | 0.001888 | HC_vs_MS.Trt_B |
| ZNF124   | 1.18E-07 | 0.57091 | 0.665 | 0.51 | 0.00189  | HC_vs_MS.Trt_B |
| RICTOR   | 1.19E-07 | 0.25743 | 0.796 | 0.66 | 0.001899 | HC_vs_MS.Trt_B |
| TSKU     | 1.20E-07 | 0.29202 | 0.488 | 0.32 | 0.001917 | HC_vs_MS.Trt_B |
| PNLIPRP1 | 1.20E-07 | 0.25335 | 0.809 | 0.7  | 0.001921 | HC_vs_MS.Trt_B |
| GCNT2    | 1.21E-07 | 0.65615 | 0.732 | 0.58 | 0.001934 | HC_vs_MS.Trt_B |
| FBXO27   | 1.23E-07 | 0.27839 | 0.697 | 0.58 | 0.001968 | HC_vs_MS.Trt_B |
| MARVELD2 | 1.23E-07 | 0.58121 | 0.59  | 0.48 | 0.001972 | HC_vs_MS.Trt_B |
| SMARCA4  | 1.27E-07 | -0.5363 | 0.79  | 0.66 | 0.002036 | HC_vs_MS.Trt_B |
| TRIM65   | 1.29E-07 | 0.40207 | 0.684 | 0.53 | 0.002067 | HC_vs_MS.Trt_B |
| KCNJ5    | 1.30E-07 | 0.49971 | 0.597 | 0.47 | 0.002081 | HC_vs_MS.Trt_B |
| DDX46    | 1.31E-07 | 0.94756 | 0.52  | 0.39 | 0.002095 | HC_vs_MS.Trt_B |
| CDC14B   | 1.32E-07 | 1.38676 | 0.322 | 0.18 | 0.002105 | HC_vs_MS.Trt_B |
| SIDT1    | 1.33E-07 | 0.55051 | 0.781 | 0.65 | 0.002117 | HC_vs_MS.Trt_B |
| ZCCHC8   | 1.35E-07 | 0.31168 | 0.813 | 0.69 | 0.002153 | HC_vs_MS.Trt_B |
| SCUBE2   | 1.36E-07 | 0.34863 | 0.304 | 0.17 | 0.002166 | HC_vs_MS.Trt_B |
| SRSF4    | 1.36E-07 | 0.37887 | 0.703 | 0.56 | 0.002179 | HC_vs_MS.Trt_B |
| WHSC1    | 1.37E-07 | 0.34814 | 0.707 | 0.54 | 0.002188 | HC_vs_MS.Trt_B |
| NRBP1    | 1.37E-07 | 0.39985 | 0.593 | 0.43 | 0.002191 | HC_vs_MS.Trt_B |
| ZNF345   | 1.38E-07 | 0.27195 | 0.814 | 0.68 | 0.002204 | HC_vs_MS.Trt_B |
| PCF11    | 1.39E-07 | 0.45774 | 0.519 | 0.36 | 0.002221 | HC_vs_MS.Trt_B |
| PNPLA3   | 1.49E-07 | 0.33137 | 0.53  | 0.39 | 0.002387 | HC_vs_MS.Trt_B |
| LIX1     | 1.50E-07 | 0.27872 | 0.387 | 0.24 | 0.002397 | HC_vs_MS.Trt_B |
| SLC35A3  | 1.51E-07 | 0.78269 | 0.799 | 0.68 | 0.002415 | HC_vs_MS.Trt_B |
| LRBA     | 1.52E-07 | 0.38026 | 0.477 | 0.33 | 0.002426 | HC_vs_MS.Trt_B |
| SNX20    | 1.53E-07 | 0.37771 | 0.481 | 0.32 | 0.002447 | HC_vs_MS.Trt_B |
| CALCOCO2 | 1.53E-07 | -0.2812 | 0.988 | 0.95 | 0.002448 | HC_vs_MS.Trt_B |
| CHGB     | 1.55E-07 | 0.68657 | 0.458 | 0.31 | 0.002474 | HC_vs_MS.Trt_B |
| NEK5     | 1.61E-07 | 0.31703 | 0.852 | 0.71 | 0.00257  | HC_vs_MS.Trt_B |
| INIP     | 1.63E-07 | 0.38821 | 0.681 | 0.55 | 0.002607 | HC_vs_MS.Trt_B |
| OCLN     | 1.65E-07 | 0.39257 | 0.796 | 0.63 | 0.002633 | HC_vs_MS.Trt_B |
| RASGRP1  | 1.68E-07 | 0.33527 | 0.354 | 0.22 | 0.002677 | HC_vs_MS.Trt_B |
| SORT1    | 1.70E-07 | 0.60689 | 0.528 | 0.38 | 0.002721 | HC_vs_MS.Trt_B |
| PIGB     | 1.71E-07 | 0.42509 | 0.775 | 0.65 | 0.002733 | HC_vs_MS.Trt_B |
| MYADM    | 1.73E-07 | 0.2528  | 0.728 | 0.6  | 0.002758 | HC_vs_MS.Trt_B |
| ATXN2    | 1.76E-07 | 0.61229 | 0.88  | 0.79 | 0.002808 | HC_vs_MS.Trt_B |
| HECTD4   | 1.76E-07 | 0.32851 | 0.662 | 0.52 | 0.002819 | HC_vs_MS.Trt_B |
| TAZ      | 1.80E-07 | 0.48436 | 0.543 | 0.38 | 0.002876 | HC_vs_MS.Trt_B |
| ZNF546   | 1.82E-07 | 0.28468 | 0.893 | 0.8  | 0.002904 | HC_vs_MS.Trt_B |
| BANP     | 1.84E-07 | 0.46475 | 0.658 | 0.52 | 0.002933 | HC_vs_MS.Trt_B |

|          |          |         |       |      |          |                |
|----------|----------|---------|-------|------|----------|----------------|
| PPARGC1B | 1.85E-07 | 0.8597  | 0.694 | 0.56 | 0.002961 | HC_vs_MS.Trt_B |
| NDUFAF5  | 1.86E-07 | 0.55188 | 0.538 | 0.38 | 0.00297  | HC_vs_MS.Trt_B |
| CCDC81   | 1.91E-07 | 0.35153 | 0.486 | 0.34 | 0.003055 | HC_vs_MS.Trt_B |
| HELLS    | 1.92E-07 | 0.32876 | 0.774 | 0.65 | 0.003066 | HC_vs_MS.Trt_B |
| GNA11    | 1.92E-07 | 0.49262 | 0.53  | 0.39 | 0.003067 | HC_vs_MS.Trt_B |
| TPH1     | 1.95E-07 | -0.81   | 0.51  | 0.35 | 0.00311  | HC_vs_MS.Trt_B |
| SH2D6    | 2.00E-07 | 0.39224 | 0.417 | 0.27 | 0.003197 | HC_vs_MS.Trt_B |
| TTL5     | 2.01E-07 | 0.75011 | 0.632 | 0.5  | 0.003205 | HC_vs_MS.Trt_B |
| AOAH     | 2.01E-07 | -0.9112 | 0.386 | 0.24 | 0.00321  | HC_vs_MS.Trt_B |
| AP5S1    | 2.02E-07 | 0.54888 | 0.864 | 0.75 | 0.00322  | HC_vs_MS.Trt_B |
| NFE2L2   | 2.02E-07 | 0.39473 | 0.561 | 0.41 | 0.003227 | HC_vs_MS.Trt_B |
| TMEM135  | 2.03E-07 | -0.3079 | 0.768 | 0.62 | 0.003249 | HC_vs_MS.Trt_B |
| SNIP1    | 2.10E-07 | 0.36982 | 0.659 | 0.53 | 0.003353 | HC_vs_MS.Trt_B |
| COG8     | 2.16E-07 | 0.30405 | 0.629 | 0.48 | 0.003458 | HC_vs_MS.Trt_B |
| AZIN2    | 2.17E-07 | -0.8291 | 0.319 | 0.18 | 0.00346  | HC_vs_MS.Trt_B |
| LILRB4   | 2.18E-07 | 0.37272 | 0.336 | 0.2  | 0.003487 | HC_vs_MS.Trt_B |
| DDX10    | 2.20E-07 | 0.95906 | 0.612 | 0.48 | 0.003516 | HC_vs_MS.Trt_B |
| ZNF566   | 2.22E-07 | 0.39631 | 0.861 | 0.75 | 0.003538 | HC_vs_MS.Trt_B |
| TBC1D5   | 2.22E-07 | 0.25542 | 0.597 | 0.44 | 0.003546 | HC_vs_MS.Trt_B |
| TBX6     | 2.24E-07 | 0.28551 | 0.47  | 0.33 | 0.003583 | HC_vs_MS.Trt_B |
| UGGT2    | 2.26E-07 | 0.27119 | 0.803 | 0.65 | 0.003608 | HC_vs_MS.Trt_B |
| AGO3     | 2.28E-07 | 0.5198  | 0.965 | 0.92 | 0.003638 | HC_vs_MS.Trt_B |
| SIRT5    | 2.28E-07 | 0.43591 | 0.857 | 0.75 | 0.003641 | HC_vs_MS.Trt_B |
| NELFA    | 2.29E-07 | 0.66665 | 0.786 | 0.66 | 0.003651 | HC_vs_MS.Trt_B |
| C16orf70 | 2.32E-07 | -0.355  | 0.661 | 0.51 | 0.003713 | HC_vs_MS.Trt_B |
| MYO1B    | 2.36E-07 | 0.30237 | 0.393 | 0.25 | 0.003769 | HC_vs_MS.Trt_B |
| STX7     | 2.39E-07 | 0.28864 | 0.72  | 0.58 | 0.003813 | HC_vs_MS.Trt_B |
| AMN1     | 2.40E-07 | 0.25377 | 0.765 | 0.6  | 0.003828 | HC_vs_MS.Trt_B |
| MAPT     | 2.41E-07 | 0.40988 | 0.677 | 0.51 | 0.003842 | HC_vs_MS.Trt_B |
| USP46    | 2.41E-07 | 0.25393 | 0.717 | 0.56 | 0.003851 | HC_vs_MS.Trt_B |
| TMEM189  | 2.43E-07 | 0.30287 | 0.829 | 0.69 | 0.003876 | HC_vs_MS.Trt_B |
| KLLN     | 2.43E-07 | 0.36484 | 0.461 | 0.31 | 0.003886 | HC_vs_MS.Trt_B |
| PROCR    | 2.46E-07 | 0.25764 | 0.839 | 0.73 | 0.003935 | HC_vs_MS.Trt_B |
| HSD17B2  | 2.48E-07 | 0.4511  | 0.749 | 0.62 | 0.003955 | HC_vs_MS.Trt_B |
| LARGE1   | 2.56E-07 | 0.31875 | 0.557 | 0.41 | 0.004094 | HC_vs_MS.Trt_B |
| ACAP2    | 2.60E-07 | 0.31821 | 0.687 | 0.55 | 0.004161 | HC_vs_MS.Trt_B |
| RNFT2    | 2.63E-07 | 0.34551 | 0.87  | 0.76 | 0.004194 | HC_vs_MS.Trt_B |
| NUP107   | 2.65E-07 | 0.62014 | 0.741 | 0.6  | 0.00424  | HC_vs_MS.Trt_B |
| ZNF347   | 2.66E-07 | 0.62125 | 0.91  | 0.82 | 0.00425  | HC_vs_MS.Trt_B |
| ESCO2    | 2.69E-07 | 0.33641 | 0.665 | 0.56 | 0.004289 | HC_vs_MS.Trt_B |

|          |          |         |       |      |          |                |
|----------|----------|---------|-------|------|----------|----------------|
| FGFR1OP  | 2.73E-07 | -0.3305 | 0.835 | 0.7  | 0.004355 | HC_vs_MS.Trt_B |
| PIGX     | 2.73E-07 | 0.53397 | 0.43  | 0.3  | 0.004364 | HC_vs_MS.Trt_B |
| ZFAND3   | 2.73E-07 | 0.83925 | 0.642 | 0.5  | 0.004368 | HC_vs_MS.Trt_B |
| ELK3     | 2.74E-07 | 0.33967 | 0.393 | 0.24 | 0.004375 | HC_vs_MS.Trt_B |
| SH3BP5   | 2.79E-07 | 0.37292 | 0.801 | 0.7  | 0.004454 | HC_vs_MS.Trt_B |
| ZNF320   | 2.85E-07 | 0.32923 | 0.977 | 0.92 | 0.00455  | HC_vs_MS.Trt_B |
| PNRC1    | 2.86E-07 | 0.77977 | 0.31  | 0.18 | 0.004561 | HC_vs_MS.Trt_B |
| CLNK     | 2.88E-07 | 0.31398 | 0.626 | 0.49 | 0.004602 | HC_vs_MS.Trt_B |
| SEC14L1  | 2.91E-07 | 0.88474 | 0.665 | 0.53 | 0.004653 | HC_vs_MS.Trt_B |
| ASAP3    | 2.91E-07 | 0.29342 | 0.53  | 0.38 | 0.004655 | HC_vs_MS.Trt_B |
| SPIB     | 2.92E-07 | 0.28821 | 0.822 | 0.75 | 0.004658 | HC_vs_MS.Trt_B |
| PDPK1    | 2.94E-07 | 0.4829  | 0.599 | 0.45 | 0.004699 | HC_vs_MS.Trt_B |
| STOML1   | 2.94E-07 | 0.31967 | 0.765 | 0.63 | 0.004701 | HC_vs_MS.Trt_B |
| COX20    | 2.95E-07 | -0.6146 | 0.652 | 0.48 | 0.004717 | HC_vs_MS.Trt_B |
| DDX58    | 2.96E-07 | 0.51825 | 0.338 | 0.2  | 0.004729 | HC_vs_MS.Trt_B |
| SLA2     | 2.98E-07 | 0.97076 | 0.522 | 0.38 | 0.004758 | HC_vs_MS.Trt_B |
| BICDL2   | 2.99E-07 | 0.30222 | 0.296 | 0.16 | 0.004769 | HC_vs_MS.Trt_B |
| HYOU1    | 3.02E-07 | 0.51586 | 0.475 | 0.31 | 0.004821 | HC_vs_MS.Trt_B |
| BLZF1    | 3.03E-07 | 0.7909  | 0.441 | 0.31 | 0.004837 | HC_vs_MS.Trt_B |
| GFOD2    | 3.06E-07 | 0.47498 | 0.886 | 0.81 | 0.004887 | HC_vs_MS.Trt_B |
| CPA4     | 3.09E-07 | 0.29805 | 0.525 | 0.38 | 0.004941 | HC_vs_MS.Trt_B |
| PTRF     | 3.14E-07 | 0.31371 | 0.352 | 0.21 | 0.00502  | HC_vs_MS.Trt_B |
| USP37    | 3.15E-07 | -0.3453 | 0.467 | 0.31 | 0.005034 | HC_vs_MS.Trt_B |
| COQ5     | 3.15E-07 | 0.48026 | 0.864 | 0.69 | 0.005038 | HC_vs_MS.Trt_B |
| NNT      | 3.19E-07 | 0.41562 | 0.638 | 0.5  | 0.005089 | HC_vs_MS.Trt_B |
| KRAS     | 3.24E-07 | 0.42563 | 0.372 | 0.23 | 0.005173 | HC_vs_MS.Trt_B |
| DMBX1    | 3.28E-07 | 0.34337 | 0.394 | 0.25 | 0.005231 | HC_vs_MS.Trt_B |
| HEATR3   | 3.29E-07 | 1.07054 | 0.625 | 0.47 | 0.00526  | HC_vs_MS.Trt_B |
| CHD1     | 3.39E-07 | 0.39724 | 0.468 | 0.33 | 0.005422 | HC_vs_MS.Trt_B |
| ZNF525   | 3.40E-07 | -1.5593 | 0.597 | 0.45 | 0.005427 | HC_vs_MS.Trt_B |
| CAPZA2   | 3.44E-07 | -0.5154 | 0.891 | 0.82 | 0.005499 | HC_vs_MS.Trt_B |
| ARID3B   | 3.51E-07 | 0.53658 | 0.712 | 0.6  | 0.005602 | HC_vs_MS.Trt_B |
| ZC3HAV1L | 3.53E-07 | 0.46136 | 0.433 | 0.29 | 0.005632 | HC_vs_MS.Trt_B |
| SRGAP3   | 3.57E-07 | -0.3258 | 0.862 | 0.75 | 0.005703 | HC_vs_MS.Trt_B |
| SRBD1    | 3.57E-07 | -0.4233 | 0.355 | 0.22 | 0.005704 | HC_vs_MS.Trt_B |
| RRM1     | 3.58E-07 | 0.39829 | 0.341 | 0.2  | 0.005724 | HC_vs_MS.Trt_B |
| GRAMD2   | 3.63E-07 | 0.27262 | 0.617 | 0.48 | 0.005793 | HC_vs_MS.Trt_B |
| SPNS1    | 3.69E-07 | 0.30294 | 0.787 | 0.67 | 0.005894 | HC_vs_MS.Trt_B |
| PARN     | 3.75E-07 | 0.29025 | 0.714 | 0.61 | 0.005993 | HC_vs_MS.Trt_B |
| WDR90    | 3.75E-07 | 0.25378 | 0.878 | 0.78 | 0.005997 | HC_vs_MS.Trt_B |



|            |          |         |       |      |          |                |
|------------|----------|---------|-------|------|----------|----------------|
| GTF2H2     | 3.78E-07 | 0.32441 | 0.884 | 0.82 | 0.006033 | HC_vs_MS.Trt_B |
| HLA-DQB1   | 3.83E-07 | 0.5467  | 0.546 | 0.39 | 0.006113 | HC_vs_MS.Trt_B |
| NAMPT      | 3.84E-07 | 0.9763  | 0.687 | 0.56 | 0.006138 | HC_vs_MS.Trt_B |
| SDE2       | 3.86E-07 | 0.40556 | 0.657 | 0.53 | 0.006159 | HC_vs_MS.Trt_B |
| DLST       | 3.94E-07 | 0.42102 | 0.888 | 0.79 | 0.006298 | HC_vs_MS.Trt_B |
| SAG        | 3.98E-07 | 0.25428 | 0.942 | 0.92 | 0.006349 | HC_vs_MS.Trt_B |
| SLC2A10    | 4.01E-07 | 0.36733 | 0.458 | 0.31 | 0.006398 | HC_vs_MS.Trt_B |
| SLC27A1    | 4.02E-07 | 0.50311 | 0.797 | 0.69 | 0.006426 | HC_vs_MS.Trt_B |
| SLC4A1     | 4.12E-07 | 0.33991 | 0.671 | 0.52 | 0.006579 | HC_vs_MS.Trt_B |
| BMS1       | 4.13E-07 | 0.31182 | 0.536 | 0.39 | 0.006597 | HC_vs_MS.Trt_B |
| PSPH       | 4.16E-07 | 0.39742 | 0.83  | 0.71 | 0.006649 | HC_vs_MS.Trt_B |
| GNB4       | 4.23E-07 | 0.36305 | 0.791 | 0.68 | 0.006749 | HC_vs_MS.Trt_B |
| CHPT1      | 4.26E-07 | 0.37259 | 0.609 | 0.46 | 0.006803 | HC_vs_MS.Trt_B |
| GSTO2      | 4.32E-07 | 0.33038 | 0.858 | 0.72 | 0.006899 | HC_vs_MS.Trt_B |
| CEP41      | 4.34E-07 | 0.26911 | 0.751 | 0.62 | 0.006926 | HC_vs_MS.Trt_B |
| ZFPM2      | 4.36E-07 | 0.35834 | 0.417 | 0.28 | 0.006958 | HC_vs_MS.Trt_B |
| ULK2       | 4.36E-07 | 0.49073 | 0.701 | 0.57 | 0.006972 | HC_vs_MS.Trt_B |
| NFYC       | 4.37E-07 | 0.27358 | 0.572 | 0.42 | 0.006976 | HC_vs_MS.Trt_B |
| GSK3B      | 4.38E-07 | 0.5114  | 0.712 | 0.57 | 0.007002 | HC_vs_MS.Trt_B |
| KIAA0930   | 4.47E-07 | 0.44782 | 0.612 | 0.48 | 0.007134 | HC_vs_MS.Trt_B |
| PRPF38A    | 4.56E-07 | -0.4081 | 0.612 | 0.46 | 0.007291 | HC_vs_MS.Trt_B |
| POM121C    | 4.60E-07 | 0.552   | 0.494 | 0.35 | 0.007346 | HC_vs_MS.Trt_B |
| TAOK3      | 4.64E-07 | 0.35698 | 0.759 | 0.65 | 0.007408 | HC_vs_MS.Trt_B |
| SLC25A15   | 4.69E-07 | 0.28071 | 0.672 | 0.53 | 0.007493 | HC_vs_MS.Trt_B |
| TRAF6      | 4.70E-07 | 0.59887 | 0.712 | 0.56 | 0.007511 | HC_vs_MS.Trt_B |
| OSBPL1A    | 4.76E-07 | 0.30992 | 0.736 | 0.59 | 0.007597 | HC_vs_MS.Trt_B |
| CCZ1       | 4.78E-07 | 0.34132 | 0.72  | 0.56 | 0.00764  | HC_vs_MS.Trt_B |
| SCHIP1     | 4.81E-07 | 0.39903 | 0.532 | 0.38 | 0.00769  | HC_vs_MS.Trt_B |
| ELMO1      | 4.91E-07 | 0.33262 | 0.754 | 0.64 | 0.007845 | HC_vs_MS.Trt_B |
| SLC25A34   | 4.93E-07 | 0.48056 | 0.622 | 0.47 | 0.007873 | HC_vs_MS.Trt_B |
| HIVEP2     | 5.05E-07 | 0.39396 | 0.396 | 0.25 | 0.00806  | HC_vs_MS.Trt_B |
| NABP1      | 5.09E-07 | 0.36646 | 0.757 | 0.64 | 0.008125 | HC_vs_MS.Trt_B |
| APOBEC3G   | 5.17E-07 | 0.27481 | 0.77  | 0.65 | 0.008264 | HC_vs_MS.Trt_B |
| JMJD7-PLA2 | 5.19E-07 | -0.3091 | 0.386 | 0.25 | 0.008289 | HC_vs_MS.Trt_B |
| DPPA4      | 5.20E-07 | 0.30762 | 0.852 | 0.76 | 0.008306 | HC_vs_MS.Trt_B |
| TMEM107    | 5.20E-07 | -0.4287 | 0.583 | 0.42 | 0.008313 | HC_vs_MS.Trt_B |
| KIAA1841   | 5.21E-07 | 0.63814 | 0.846 | 0.75 | 0.008314 | HC_vs_MS.Trt_B |
| NXPE3      | 5.37E-07 | 0.60548 | 0.907 | 0.82 | 0.008577 | HC_vs_MS.Trt_B |
| UBXN7      | 5.38E-07 | 0.70498 | 0.787 | 0.65 | 0.008598 | HC_vs_MS.Trt_B |
| MCM8       | 5.45E-07 | 0.51012 | 0.696 | 0.57 | 0.008711 | HC_vs_MS.Trt_B |

|             |          |         |       |      |          |                |
|-------------|----------|---------|-------|------|----------|----------------|
| MAP7D3      | 5.49E-07 | 1.02713 | 0.577 | 0.43 | 0.008769 | HC_vs_MS.Trt_B |
| SIN3B       | 5.50E-07 | 0.61767 | 0.754 | 0.62 | 0.00878  | HC_vs_MS.Trt_B |
| LUZP1       | 5.56E-07 | 0.49686 | 0.478 | 0.34 | 0.008881 | HC_vs_MS.Trt_B |
| GAB1        | 5.61E-07 | 0.33647 | 0.532 | 0.4  | 0.008961 | HC_vs_MS.Trt_B |
| PRRC2A      | 5.65E-07 | 0.50414 | 0.757 | 0.65 | 0.00903  | HC_vs_MS.Trt_B |
| USP22       | 5.67E-07 | 0.41813 | 0.83  | 0.7  | 0.009059 | HC_vs_MS.Trt_B |
| ZNF556      | 5.68E-07 | 0.27502 | 0.939 | 0.86 | 0.009076 | HC_vs_MS.Trt_B |
| OAZ2        | 5.73E-07 | 0.28475 | 0.755 | 0.63 | 0.009145 | HC_vs_MS.Trt_B |
| PGBD2       | 5.75E-07 | 0.49187 | 0.301 | 0.16 | 0.009182 | HC_vs_MS.Trt_B |
| PTRH1       | 6.02E-07 | 0.42355 | 0.736 | 0.6  | 0.009621 | HC_vs_MS.Trt_B |
| C17orf62    | 6.14E-07 | 0.44872 | 0.719 | 0.6  | 0.009808 | HC_vs_MS.Trt_B |
| DPH6        | 6.23E-07 | 0.59553 | 0.409 | 0.28 | 0.009949 | HC_vs_MS.Trt_B |
| HELZ2       | 6.26E-07 | 1.3043  | 0.633 | 0.5  | 0.009995 | HC_vs_MS.Trt_B |
| PDLIM5      | 6.33E-07 | 0.50591 | 0.872 | 0.77 | 0.010104 | HC_vs_MS.Trt_B |
| HAP1        | 6.33E-07 | 0.31482 | 0.746 | 0.6  | 0.010109 | HC_vs_MS.Trt_B |
| COPB2       | 6.37E-07 | 0.34404 | 0.896 | 0.82 | 0.010178 | HC_vs_MS.Trt_B |
| TMEM184A    | 6.38E-07 | -0.5039 | 0.419 | 0.27 | 0.010184 | HC_vs_MS.Trt_B |
| FER         | 6.45E-07 | 1.18601 | 0.504 | 0.36 | 0.010306 | HC_vs_MS.Trt_B |
| TAF1        | 6.49E-07 | 0.34806 | 0.799 | 0.68 | 0.010362 | HC_vs_MS.Trt_B |
| DENND4A     | 6.61E-07 | 0.25493 | 0.388 | 0.25 | 0.010556 | HC_vs_MS.Trt_B |
| TMEM127     | 6.76E-07 | 0.44903 | 0.691 | 0.57 | 0.010791 | HC_vs_MS.Trt_B |
| SMPD3       | 6.77E-07 | 0.73022 | 0.696 | 0.53 | 0.010818 | HC_vs_MS.Trt_B |
| TRAPPC8     | 6.83E-07 | 0.34699 | 0.672 | 0.51 | 0.010909 | HC_vs_MS.Trt_B |
| SNTB2       | 6.83E-07 | 0.59282 | 0.774 | 0.6  | 0.010914 | HC_vs_MS.Trt_B |
| SCLT1       | 6.85E-07 | 0.39986 | 0.614 | 0.47 | 0.01094  | HC_vs_MS.Trt_B |
| OGFOD3      | 6.90E-07 | 0.97004 | 0.577 | 0.45 | 0.011013 | HC_vs_MS.Trt_B |
| URB1        | 6.95E-07 | 0.73611 | 0.471 | 0.34 | 0.011097 | HC_vs_MS.Trt_B |
| ZCCHC4      | 6.96E-07 | 0.5279  | 0.635 | 0.48 | 0.01112  | HC_vs_MS.Trt_B |
| ZNF561      | 6.99E-07 | 0.2635  | 0.532 | 0.4  | 0.011166 | HC_vs_MS.Trt_B |
| CCT6B       | 7.08E-07 | 0.68002 | 0.255 | 0.14 | 0.011313 | HC_vs_MS.Trt_B |
| ARL10       | 7.14E-07 | 0.4902  | 0.849 | 0.78 | 0.011399 | HC_vs_MS.Trt_B |
| RP11-77H9.1 | 7.27E-07 | 0.25875 | 0.497 | 0.36 | 0.011618 | HC_vs_MS.Trt_B |
| HSP90AA1    | 7.36E-07 | 0.29303 | 0.614 | 0.51 | 0.011757 | HC_vs_MS.Trt_B |
| ACSM2A      | 7.43E-07 | 0.39774 | 0.467 | 0.34 | 0.011864 | HC_vs_MS.Trt_B |
| HBG2        | 7.55E-07 | -1.3504 | 0.457 | 0.32 | 0.012057 | HC_vs_MS.Trt_B |
| DNAJC18     | 7.55E-07 | 0.3442  | 0.826 | 0.74 | 0.012063 | HC_vs_MS.Trt_B |
| HSD17B13    | 7.60E-07 | 0.44193 | 0.57  | 0.43 | 0.012141 | HC_vs_MS.Trt_B |
| BICDL1      | 7.73E-07 | -0.381  | 0.581 | 0.46 | 0.012345 | HC_vs_MS.Trt_B |
| PANK3       | 7.79E-07 | 0.36143 | 0.429 | 0.29 | 0.012436 | HC_vs_MS.Trt_B |
| ZNF773      | 7.82E-07 | 0.95666 | 0.571 | 0.46 | 0.012495 | HC_vs_MS.Trt_B |

|          |          |         |       |      |          |                |
|----------|----------|---------|-------|------|----------|----------------|
| MZT2A    | 7.84E-07 | 0.2835  | 0.786 | 0.66 | 0.012524 | HC_vs_MS.Trt_B |
| PPP1CB   | 7.93E-07 | -0.9573 | 0.636 | 0.72 | 0.012662 | HC_vs_MS.Trt_B |
| TMEM44   | 7.93E-07 | 0.41836 | 0.59  | 0.45 | 0.01267  | HC_vs_MS.Trt_B |
| CACNA1D  | 7.96E-07 | 0.68276 | 0.661 | 0.52 | 0.012713 | HC_vs_MS.Trt_B |
| RABL2B   | 8.03E-07 | 0.37408 | 0.867 | 0.79 | 0.012827 | HC_vs_MS.Trt_B |
| MAPK6    | 8.11E-07 | 0.61852 | 0.446 | 0.31 | 0.012947 | HC_vs_MS.Trt_B |
| TNIP3    | 8.14E-07 | 0.31968 | 0.499 | 0.37 | 0.013008 | HC_vs_MS.Trt_B |
| RNASEL   | 8.15E-07 | 0.6558  | 0.338 | 0.2  | 0.013014 | HC_vs_MS.Trt_B |
| BCL7A    | 8.16E-07 | 0.42364 | 0.649 | 0.54 | 0.013037 | HC_vs_MS.Trt_B |
| NR4A1    | 8.19E-07 | 0.4032  | 0.435 | 0.3  | 0.013084 | HC_vs_MS.Trt_B |
| TRMT44   | 8.20E-07 | 0.51059 | 0.238 | 0.12 | 0.013091 | HC_vs_MS.Trt_B |
| CTLA4    | 8.43E-07 | 0.6062  | 0.248 | 0.13 | 0.013471 | HC_vs_MS.Trt_B |
| DUSP28   | 8.55E-07 | 0.4569  | 0.671 | 0.58 | 0.013663 | HC_vs_MS.Trt_B |
| TMEM98   | 8.59E-07 | 0.31072 | 0.528 | 0.38 | 0.013723 | HC_vs_MS.Trt_B |
| FAM57B   | 8.61E-07 | 0.29475 | 0.672 | 0.55 | 0.013759 | HC_vs_MS.Trt_B |
| PAQR5    | 8.64E-07 | 0.25932 | 0.516 | 0.38 | 0.013794 | HC_vs_MS.Trt_B |
| CPPED1   | 8.75E-07 | -0.463  | 0.593 | 0.44 | 0.013984 | HC_vs_MS.Trt_B |
| TIMELESS | 8.90E-07 | -0.3413 | 0.301 | 0.17 | 0.014213 | HC_vs_MS.Trt_B |
| CABIN1   | 8.94E-07 | 0.95188 | 0.255 | 0.14 | 0.014285 | HC_vs_MS.Trt_B |
| NIPAL1   | 9.04E-07 | 0.26605 | 0.41  | 0.28 | 0.014438 | HC_vs_MS.Trt_B |
| MGA      | 9.07E-07 | 0.50609 | 0.858 | 0.75 | 0.014483 | HC_vs_MS.Trt_B |
| TFIP11   | 9.12E-07 | 0.62171 | 0.507 | 0.35 | 0.014567 | HC_vs_MS.Trt_B |
| BRIP1    | 9.13E-07 | -0.4513 | 0.845 | 0.7  | 0.014585 | HC_vs_MS.Trt_B |
| PEX1     | 9.28E-07 | 0.46687 | 0.67  | 0.55 | 0.014825 | HC_vs_MS.Trt_B |
| JRK      | 9.39E-07 | 1.29376 | 0.433 | 0.29 | 0.014994 | HC_vs_MS.Trt_B |
| RNF8     | 9.41E-07 | -0.2537 | 0.496 | 0.36 | 0.015034 | HC_vs_MS.Trt_B |
| TRPV3    | 9.48E-07 | 0.44745 | 0.596 | 0.46 | 0.015135 | HC_vs_MS.Trt_B |
| KCNE3    | 9.54E-07 | 0.25835 | 0.525 | 0.38 | 0.015242 | HC_vs_MS.Trt_B |
| GLYR1    | 9.62E-07 | 0.27296 | 0.391 | 0.24 | 0.01537  | HC_vs_MS.Trt_B |
| MNT      | 9.64E-07 | 0.49971 | 0.623 | 0.5  | 0.015396 | HC_vs_MS.Trt_B |
| TLR6     | 9.67E-07 | 1.27863 | 0.303 | 0.18 | 0.015444 | HC_vs_MS.Trt_B |
| PNMA2    | 9.68E-07 | 0.35033 | 0.658 | 0.54 | 0.01547  | HC_vs_MS.Trt_B |
| CHP2     | 9.79E-07 | 0.27559 | 0.407 | 0.26 | 0.015632 | HC_vs_MS.Trt_B |
| NUB1     | 9.80E-07 | 0.36835 | 0.874 | 0.78 | 0.015649 | HC_vs_MS.Trt_B |
| C12orf40 | 9.86E-07 | 0.76528 | 0.288 | 0.16 | 0.015743 | HC_vs_MS.Trt_B |
| DENND1A  | 9.93E-07 | 0.32941 | 0.435 | 0.31 | 0.015868 | HC_vs_MS.Trt_B |
| SCN3B    | 9.99E-07 | 0.35629 | 0.68  | 0.59 | 0.01595  | HC_vs_MS.Trt_B |
| NRG4     | 1.01E-06 | 0.33089 | 0.667 | 0.54 | 0.016117 | HC_vs_MS.Trt_B |
| ATG10    | 1.02E-06 | 0.30831 | 0.936 | 0.85 | 0.016255 | HC_vs_MS.Trt_B |
| ACACB    | 1.03E-06 | -0.5505 | 0.929 | 0.83 | 0.016532 | HC_vs_MS.Trt_B |

|            |          |         |       |      |          |                |
|------------|----------|---------|-------|------|----------|----------------|
| ANGEL2     | 1.04E-06 | -0.3165 | 0.696 | 0.57 | 0.016595 | HC_vs_MS.Trt_B |
| ZNF470     | 1.04E-06 | 0.41336 | 0.714 | 0.57 | 0.016616 | HC_vs_MS.Trt_B |
| LSAMP      | 1.05E-06 | 0.29044 | 0.443 | 0.29 | 0.01672  | HC_vs_MS.Trt_B |
| HSD3B7     | 1.05E-06 | 0.76421 | 0.432 | 0.29 | 0.016819 | HC_vs_MS.Trt_B |
| ELAC2      | 1.10E-06 | 0.30039 | 0.674 | 0.52 | 0.017604 | HC_vs_MS.Trt_B |
| ZNF670-ZNF | 1.12E-06 | 0.29982 | 0.63  | 0.49 | 0.017867 | HC_vs_MS.Trt_B |
| PPFIA1     | 1.13E-06 | 0.44278 | 0.657 | 0.52 | 0.018007 | HC_vs_MS.Trt_B |
| KIAA1257   | 1.14E-06 | 0.37495 | 0.562 | 0.42 | 0.018137 | HC_vs_MS.Trt_B |
| MED25      | 1.14E-06 | 0.6949  | 0.486 | 0.34 | 0.018177 | HC_vs_MS.Trt_B |
| SPP2       | 1.14E-06 | 0.31458 | 0.691 | 0.57 | 0.018178 | HC_vs_MS.Trt_B |
| MRPS28     | 1.14E-06 | 0.48329 | 0.596 | 0.45 | 0.018186 | HC_vs_MS.Trt_B |
| PLEKHM1    | 1.15E-06 | 0.66863 | 0.816 | 0.66 | 0.018336 | HC_vs_MS.Trt_B |
| BAG1       | 1.15E-06 | 0.44316 | 0.926 | 0.83 | 0.01837  | HC_vs_MS.Trt_B |
| CRLS1      | 1.18E-06 | 0.50257 | 0.417 | 0.28 | 0.018828 | HC_vs_MS.Trt_B |
| ZFR2       | 1.19E-06 | 0.35774 | 0.48  | 0.36 | 0.019015 | HC_vs_MS.Trt_B |
| SOX6       | 1.21E-06 | 0.54912 | 0.429 | 0.29 | 0.019322 | HC_vs_MS.Trt_B |
| C9orf64    | 1.22E-06 | 0.70156 | 0.596 | 0.44 | 0.019491 | HC_vs_MS.Trt_B |
| WDTC1      | 1.22E-06 | 0.97991 | 0.359 | 0.23 | 0.01953  | HC_vs_MS.Trt_B |
| MSRA       | 1.23E-06 | 0.48886 | 0.239 | 0.12 | 0.019655 | HC_vs_MS.Trt_B |
| BUD31      | 1.24E-06 | -0.4262 | 0.714 | 0.59 | 0.019853 | HC_vs_MS.Trt_B |
| PPIL2      | 1.25E-06 | 0.61146 | 0.394 | 0.26 | 0.019949 | HC_vs_MS.Trt_B |
| THG1L      | 1.25E-06 | -0.4428 | 0.551 | 0.41 | 0.019954 | HC_vs_MS.Trt_B |
| MYOM3      | 1.25E-06 | 0.44399 | 0.561 | 0.44 | 0.019964 | HC_vs_MS.Trt_B |
| ACBD6      | 1.26E-06 | 0.44537 | 0.467 | 0.34 | 0.020166 | HC_vs_MS.Trt_B |
| NR2C1      | 1.29E-06 | 0.49609 | 0.648 | 0.48 | 0.020649 | HC_vs_MS.Trt_B |
| TMC8       | 1.30E-06 | 0.27853 | 0.748 | 0.65 | 0.020685 | HC_vs_MS.Trt_B |
| DHTKD1     | 1.30E-06 | 0.39066 | 0.806 | 0.69 | 0.020694 | HC_vs_MS.Trt_B |
| ZNF814     | 1.30E-06 | 0.41533 | 0.954 | 0.89 | 0.020808 | HC_vs_MS.Trt_B |
| PXYLP1     | 1.31E-06 | 1.04055 | 0.5   | 0.35 | 0.020936 | HC_vs_MS.Trt_B |
| ZNF7       | 1.31E-06 | -0.2756 | 0.928 | 0.85 | 0.02098  | HC_vs_MS.Trt_B |
| TEN1-CDK3  | 1.31E-06 | -0.2876 | 0.52  | 0.38 | 0.020998 | HC_vs_MS.Trt_B |
| SYNJ2      | 1.32E-06 | 0.2667  | 0.917 | 0.79 | 0.02103  | HC_vs_MS.Trt_B |
| BEST1      | 1.34E-06 | 0.56674 | 0.806 | 0.71 | 0.021327 | HC_vs_MS.Trt_B |
| TMEM199    | 1.35E-06 | 0.81292 | 0.578 | 0.44 | 0.02156  | HC_vs_MS.Trt_B |
| LRRC2      | 1.35E-06 | -0.4236 | 0.762 | 0.63 | 0.021581 | HC_vs_MS.Trt_B |
| TRAF3      | 1.36E-06 | 0.46489 | 0.342 | 0.21 | 0.021726 | HC_vs_MS.Trt_B |
| RAD17      | 1.39E-06 | 0.49874 | 0.496 | 0.36 | 0.022133 | HC_vs_MS.Trt_B |
| PAQR8      | 1.39E-06 | 1.01551 | 0.51  | 0.38 | 0.022196 | HC_vs_MS.Trt_B |
| ABC7-42404 | 1.40E-06 | 0.59044 | 0.707 | 0.59 | 0.022366 | HC_vs_MS.Trt_B |
| SLC35A5    | 1.40E-06 | -1.0132 | 0.436 | 0.3  | 0.022428 | HC_vs_MS.Trt_B |

|             |          |         |       |      |          |                |
|-------------|----------|---------|-------|------|----------|----------------|
| NARFL       | 1.44E-06 | 0.38508 | 0.762 | 0.62 | 0.022981 | HC_vs_MS.Trt_B |
| GALM        | 1.44E-06 | -0.2849 | 0.561 | 0.42 | 0.023016 | HC_vs_MS.Trt_B |
| GGCX        | 1.44E-06 | 0.80834 | 0.891 | 0.82 | 0.023059 | HC_vs_MS.Trt_B |
| ZSCAN2      | 1.45E-06 | 0.45123 | 0.761 | 0.61 | 0.02314  | HC_vs_MS.Trt_B |
| LETM2       | 1.45E-06 | 0.49068 | 0.667 | 0.54 | 0.023185 | HC_vs_MS.Trt_B |
| FGD6        | 1.45E-06 | 1.09566 | 0.43  | 0.29 | 0.023223 | HC_vs_MS.Trt_B |
| TARBP1      | 1.45E-06 | -0.4335 | 0.412 | 0.27 | 0.023228 | HC_vs_MS.Trt_B |
| ADD1        | 1.47E-06 | 0.28521 | 0.787 | 0.65 | 0.02354  | HC_vs_MS.Trt_B |
| PCCB        | 1.48E-06 | 0.31887 | 0.628 | 0.48 | 0.0236   | HC_vs_MS.Trt_B |
| ZNF615      | 1.52E-06 | 0.67224 | 0.47  | 0.33 | 0.024303 | HC_vs_MS.Trt_B |
| PRDM2       | 1.52E-06 | 0.58015 | 0.426 | 0.29 | 0.024338 | HC_vs_MS.Trt_B |
| MLKL        | 1.53E-06 | 0.30729 | 0.696 | 0.54 | 0.024461 | HC_vs_MS.Trt_B |
| AEBP2       | 1.53E-06 | -0.3895 | 0.696 | 0.53 | 0.024469 | HC_vs_MS.Trt_B |
| NAGPA       | 1.53E-06 | 0.30988 | 0.638 | 0.51 | 0.02451  | HC_vs_MS.Trt_B |
| VWA5B1      | 1.56E-06 | 0.3225  | 0.574 | 0.43 | 0.024916 | HC_vs_MS.Trt_B |
| CAPRIN2     | 1.56E-06 | 0.53631 | 0.678 | 0.53 | 0.02493  | HC_vs_MS.Trt_B |
| RHBDF2      | 1.58E-06 | 0.44618 | 0.919 | 0.84 | 0.025162 | HC_vs_MS.Trt_B |
| RERE        | 1.58E-06 | 0.59985 | 0.393 | 0.25 | 0.025165 | HC_vs_MS.Trt_B |
| RSPH10B     | 1.58E-06 | 0.38963 | 0.603 | 0.46 | 0.025233 | HC_vs_MS.Trt_B |
| GALE        | 1.59E-06 | -1.3843 | 0.323 | 0.19 | 0.025374 | HC_vs_MS.Trt_B |
| CATSPER2    | 1.59E-06 | 0.57892 | 0.771 | 0.65 | 0.025428 | HC_vs_MS.Trt_B |
| STMN1       | 1.59E-06 | 0.34728 | 0.691 | 0.6  | 0.025443 | HC_vs_MS.Trt_B |
| INSR        | 1.62E-06 | 0.38239 | 0.462 | 0.31 | 0.025822 | HC_vs_MS.Trt_B |
| CBX7        | 1.62E-06 | 0.40002 | 0.413 | 0.28 | 0.025874 | HC_vs_MS.Trt_B |
| CSGALNACT   | 1.65E-06 | 0.2832  | 0.514 | 0.37 | 0.026422 | HC_vs_MS.Trt_B |
| HYAL4       | 1.66E-06 | 0.36959 | 0.572 | 0.42 | 0.026573 | HC_vs_MS.Trt_B |
| ADAR        | 1.68E-06 | 0.34156 | 0.796 | 0.74 | 0.026789 | HC_vs_MS.Trt_B |
| SLC38A3     | 1.68E-06 | 0.32177 | 0.281 | 0.16 | 0.026823 | HC_vs_MS.Trt_B |
| L2HGDH      | 1.68E-06 | 0.5282  | 0.807 | 0.73 | 0.026829 | HC_vs_MS.Trt_B |
| RP11-435I1C | 1.68E-06 | 0.44612 | 0.362 | 0.24 | 0.026841 | HC_vs_MS.Trt_B |
| SIRT2       | 1.70E-06 | 0.31318 | 0.897 | 0.81 | 0.027186 | HC_vs_MS.Trt_B |
| IRGQ        | 1.73E-06 | 0.43354 | 0.98  | 0.93 | 0.027639 | HC_vs_MS.Trt_B |
| RSRP1       | 1.76E-06 | 0.38406 | 0.929 | 0.84 | 0.028125 | HC_vs_MS.Trt_B |
| C1orf64     | 1.80E-06 | 0.27049 | 0.564 | 0.43 | 0.028734 | HC_vs_MS.Trt_B |
| RALY        | 1.82E-06 | 0.45605 | 0.399 | 0.26 | 0.028999 | HC_vs_MS.Trt_B |
| MRPS16      | 1.83E-06 | 0.38334 | 0.764 | 0.65 | 0.029201 | HC_vs_MS.Trt_B |
| RAD51B      | 1.85E-06 | 0.69634 | 0.287 | 0.17 | 0.029584 | HC_vs_MS.Trt_B |
| CCL16       | 1.85E-06 | 0.26531 | 0.607 | 0.47 | 0.029589 | HC_vs_MS.Trt_B |
| NFATC2IP    | 1.86E-06 | -0.2913 | 0.657 | 0.53 | 0.02965  | HC_vs_MS.Trt_B |
| LIX1L       | 1.86E-06 | 0.46242 | 0.775 | 0.7  | 0.029707 | HC_vs_MS.Trt_B |

|           |          |         |       |      |          |                |
|-----------|----------|---------|-------|------|----------|----------------|
| MRRF      | 1.87E-06 | 0.52841 | 0.625 | 0.51 | 0.029854 | HC_vs_MS.Trt_B |
| SLC35E2   | 1.87E-06 | 0.4416  | 0.464 | 0.33 | 0.02989  | HC_vs_MS.Trt_B |
| DIS3L2    | 1.87E-06 | 0.51608 | 0.478 | 0.33 | 0.029939 | HC_vs_MS.Trt_B |
| RUFY3     | 1.91E-06 | -0.3413 | 0.545 | 0.4  | 0.030533 | HC_vs_MS.Trt_B |
| ANKUB1    | 1.92E-06 | 0.32704 | 0.413 | 0.29 | 0.030632 | HC_vs_MS.Trt_B |
| DYM       | 1.93E-06 | 0.45487 | 0.701 | 0.55 | 0.030832 | HC_vs_MS.Trt_B |
| TSC1      | 1.94E-06 | 0.2949  | 0.478 | 0.33 | 0.030985 | HC_vs_MS.Trt_B |
| ZDHHC3    | 1.95E-06 | 0.36838 | 0.467 | 0.34 | 0.031081 | HC_vs_MS.Trt_B |
| CLMN      | 1.95E-06 | 0.3223  | 0.63  | 0.49 | 0.03109  | HC_vs_MS.Trt_B |
| HAGH      | 1.96E-06 | 0.36461 | 0.759 | 0.61 | 0.03134  | HC_vs_MS.Trt_B |
| ACAA1     | 1.97E-06 | 0.28395 | 0.468 | 0.33 | 0.031388 | HC_vs_MS.Trt_B |
| KIAA0319L | 1.98E-06 | 0.51139 | 0.662 | 0.53 | 0.031634 | HC_vs_MS.Trt_B |
| AP4E1     | 1.99E-06 | -0.2778 | 0.397 | 0.26 | 0.03175  | HC_vs_MS.Trt_B |
| COA7      | 1.99E-06 | 0.36893 | 0.871 | 0.78 | 0.031857 | HC_vs_MS.Trt_B |
| PAK4      | 2.00E-06 | 0.28941 | 0.678 | 0.56 | 0.03192  | HC_vs_MS.Trt_B |
| PKIB      | 2.01E-06 | 0.37018 | 0.7   | 0.6  | 0.032169 | HC_vs_MS.Trt_B |
| CMBL      | 2.02E-06 | 0.3191  | 0.48  | 0.35 | 0.032302 | HC_vs_MS.Trt_B |
| DNAJC21   | 2.02E-06 | 0.74536 | 0.381 | 0.26 | 0.03232  | HC_vs_MS.Trt_B |
| FNBP4     | 2.03E-06 | 0.28175 | 0.481 | 0.33 | 0.03246  | HC_vs_MS.Trt_B |
| TUSC3     | 2.06E-06 | 0.3965  | 0.41  | 0.29 | 0.032953 | HC_vs_MS.Trt_B |
| PLK5      | 2.07E-06 | 0.53569 | 0.528 | 0.38 | 0.033059 | HC_vs_MS.Trt_B |
| PLEKHA2   | 2.10E-06 | 0.31203 | 0.793 | 0.68 | 0.033496 | HC_vs_MS.Trt_B |
| SLC3A1    | 2.11E-06 | 0.44845 | 0.684 | 0.54 | 0.033774 | HC_vs_MS.Trt_B |
| ESYT2     | 2.15E-06 | 0.29708 | 0.543 | 0.41 | 0.034267 | HC_vs_MS.Trt_B |
| COA1      | 2.16E-06 | 0.41942 | 0.759 | 0.64 | 0.034558 | HC_vs_MS.Trt_B |
| TPP2      | 2.17E-06 | 0.56636 | 0.53  | 0.41 | 0.034706 | HC_vs_MS.Trt_B |
| LAMP1     | 2.17E-06 | 0.63808 | 0.372 | 0.25 | 0.034731 | HC_vs_MS.Trt_B |
| SSX5      | 2.19E-06 | 0.37898 | 0.199 | 0.09 | 0.034926 | HC_vs_MS.Trt_B |
| EP400NL   | 2.22E-06 | 0.67537 | 0.723 | 0.63 | 0.035522 | HC_vs_MS.Trt_B |
| H3F3B     | 2.24E-06 | -0.55   | 0.781 | 0.79 | 0.035799 | HC_vs_MS.Trt_B |
| GLTSCR1   | 2.26E-06 | 0.47465 | 0.581 | 0.48 | 0.036043 | HC_vs_MS.Trt_B |
| ZNF225    | 2.28E-06 | 0.66985 | 0.768 | 0.68 | 0.036475 | HC_vs_MS.Trt_B |
| CCR4      | 2.29E-06 | 0.68774 | 0.861 | 0.79 | 0.036515 | HC_vs_MS.Trt_B |
| ZYG11B    | 2.30E-06 | 1.06857 | 0.704 | 0.61 | 0.036771 | HC_vs_MS.Trt_B |
| CCDC13    | 2.32E-06 | 0.82472 | 0.32  | 0.19 | 0.037016 | HC_vs_MS.Trt_B |
| PTPRM     | 2.33E-06 | 1.2688  | 0.203 | 0.1  | 0.037139 | HC_vs_MS.Trt_B |
| ZNF839    | 2.36E-06 | 0.25202 | 0.719 | 0.57 | 0.037722 | HC_vs_MS.Trt_B |
| OR6J1     | 2.37E-06 | 0.34343 | 0.68  | 0.55 | 0.037888 | HC_vs_MS.Trt_B |
| LCMT2     | 2.37E-06 | 1.05658 | 0.654 | 0.54 | 0.037919 | HC_vs_MS.Trt_B |
| CSAD      | 2.41E-06 | 0.33002 | 0.806 | 0.68 | 0.038543 | HC_vs_MS.Trt_B |

|           |          |         |       |      |          |                |
|-----------|----------|---------|-------|------|----------|----------------|
| RAB40B    | 2.45E-06 | -0.3695 | 0.448 | 0.32 | 0.039146 | HC_vs_MS.Trt_B |
| RLIM      | 2.46E-06 | 0.30128 | 0.707 | 0.56 | 0.039268 | HC_vs_MS.Trt_B |
| WDR11     | 2.46E-06 | 0.64031 | 0.62  | 0.5  | 0.039299 | HC_vs_MS.Trt_B |
| GP2       | 2.48E-06 | 0.27756 | 0.504 | 0.37 | 0.039544 | HC_vs_MS.Trt_B |
| LINC00854 | 2.48E-06 | 0.52268 | 0.635 | 0.51 | 0.039672 | HC_vs_MS.Trt_B |
| ACSF2     | 2.50E-06 | 0.74111 | 0.47  | 0.34 | 0.039995 | HC_vs_MS.Trt_B |
| ERAP1     | 2.51E-06 | 0.55016 | 0.584 | 0.45 | 0.040077 | HC_vs_MS.Trt_B |
| CD55      | 2.51E-06 | 0.2696  | 0.487 | 0.35 | 0.040106 | HC_vs_MS.Trt_B |
| CNOT4     | 2.52E-06 | 0.57556 | 0.686 | 0.55 | 0.040267 | HC_vs_MS.Trt_B |
| TMEM186   | 2.56E-06 | 0.42819 | 0.51  | 0.37 | 0.040882 | HC_vs_MS.Trt_B |
| LDHAL6A   | 2.59E-06 | 0.25393 | 0.349 | 0.23 | 0.041299 | HC_vs_MS.Trt_B |
| FOPNL     | 2.59E-06 | 0.4841  | 0.594 | 0.45 | 0.041445 | HC_vs_MS.Trt_B |
| RNF212    | 2.64E-06 | 0.65499 | 0.572 | 0.43 | 0.042186 | HC_vs_MS.Trt_B |
| ZNF841    | 2.64E-06 | 0.81705 | 0.504 | 0.37 | 0.042227 | HC_vs_MS.Trt_B |
| ONECUT3   | 2.67E-06 | 0.31562 | 0.436 | 0.31 | 0.042656 | HC_vs_MS.Trt_B |
| NEXN      | 2.68E-06 | 0.43993 | 0.462 | 0.34 | 0.042873 | HC_vs_MS.Trt_B |
| LIPT1     | 2.70E-06 | 0.31374 | 0.671 | 0.52 | 0.04306  | HC_vs_MS.Trt_B |
| TCHP      | 2.71E-06 | 0.80479 | 0.512 | 0.38 | 0.043303 | HC_vs_MS.Trt_B |
| TIGAR     | 2.72E-06 | -0.3682 | 0.89  | 0.81 | 0.043443 | HC_vs_MS.Trt_B |
| IGFBP2    | 2.72E-06 | 0.26426 | 0.574 | 0.45 | 0.043467 | HC_vs_MS.Trt_B |
| LPIN3     | 2.72E-06 | 0.42092 | 0.432 | 0.3  | 0.043484 | HC_vs_MS.Trt_B |
| FLI1      | 2.73E-06 | 0.28837 | 0.5   | 0.36 | 0.043607 | HC_vs_MS.Trt_B |
| RPS6KL1   | 2.74E-06 | 0.27439 | 0.688 | 0.56 | 0.043728 | HC_vs_MS.Trt_B |
| CHD7      | 2.76E-06 | -0.3499 | 0.554 | 0.4  | 0.044055 | HC_vs_MS.Trt_B |
| CHTOP     | 2.77E-06 | 0.29747 | 0.593 | 0.44 | 0.044185 | HC_vs_MS.Trt_B |
| TNFRSF10A | 2.78E-06 | 0.43661 | 0.567 | 0.46 | 0.04443  | HC_vs_MS.Trt_B |
| NFIC      | 2.79E-06 | -0.6143 | 0.412 | 0.28 | 0.044621 | HC_vs_MS.Trt_B |
| PROM2     | 2.80E-06 | 0.30162 | 0.706 | 0.58 | 0.044713 | HC_vs_MS.Trt_B |
| ARNT      | 2.80E-06 | 0.73389 | 0.757 | 0.63 | 0.044767 | HC_vs_MS.Trt_B |
| CSNK1D    | 2.82E-06 | 0.366   | 0.936 | 0.86 | 0.045018 | HC_vs_MS.Trt_B |
| CEP135    | 2.85E-06 | 0.48155 | 0.757 | 0.63 | 0.045539 | HC_vs_MS.Trt_B |
| RPS2      | 2.92E-06 | 0.30312 | 0.606 | 0.47 | 0.04669  | HC_vs_MS.Trt_B |
| DDX39B    | 2.93E-06 | 0.3627  | 0.691 | 0.56 | 0.046837 | HC_vs_MS.Trt_B |
| COQ8A     | 2.96E-06 | 0.6901  | 0.633 | 0.5  | 0.047212 | HC_vs_MS.Trt_B |
| MAP2K2    | 3.00E-06 | -0.3426 | 0.704 | 0.55 | 0.047992 | HC_vs_MS.Trt_B |
| AKAP5     | 3.11E-06 | 0.75409 | 0.625 | 0.52 | 0.049686 | HC_vs_MS.Trt_B |
| PRSS27    | 3.11E-06 | 0.46356 | 0.755 | 0.64 | 0.049745 | HC_vs_MS.Trt_B |
| KCNJ6     | 3.18E-06 | 0.93959 | 0.799 | 0.72 | 0.050845 | HC_vs_MS.Trt_B |
| CPD       | 3.21E-06 | 0.25901 | 0.693 | 0.54 | 0.051241 | HC_vs_MS.Trt_B |
| PNMAL1    | 3.22E-06 | 0.30746 | 0.428 | 0.3  | 0.051407 | HC_vs_MS.Trt_B |

|           |          |         |       |      |          |                |
|-----------|----------|---------|-------|------|----------|----------------|
| IL21R     | 3.22E-06 | 0.42967 | 0.523 | 0.39 | 0.05151  | HC_vs_MS.Trt_B |
| ZNF548    | 3.29E-06 | 0.43608 | 0.638 | 0.51 | 0.052517 | HC_vs_MS.Trt_B |
| LDLRAD4   | 3.29E-06 | 0.47926 | 0.343 | 0.22 | 0.052611 | HC_vs_MS.Trt_B |
| NUP50     | 3.32E-06 | 0.49157 | 0.649 | 0.54 | 0.052952 | HC_vs_MS.Trt_B |
| MKL2      | 3.32E-06 | 0.39127 | 0.696 | 0.57 | 0.053008 | HC_vs_MS.Trt_B |
| C21orf62  | 3.33E-06 | 0.33038 | 0.535 | 0.39 | 0.053215 | HC_vs_MS.Trt_B |
| TALDO1    | 3.38E-06 | 0.25808 | 0.662 | 0.54 | 0.05392  | HC_vs_MS.Trt_B |
| EFCAB5    | 3.38E-06 | -0.3088 | 0.436 | 0.31 | 0.053963 | HC_vs_MS.Trt_B |
| MAP3K9    | 3.45E-06 | 0.76129 | 0.448 | 0.33 | 0.055136 | HC_vs_MS.Trt_B |
| KCNN2     | 3.49E-06 | 0.29893 | 0.255 | 0.14 | 0.055795 | HC_vs_MS.Trt_B |
| GRSF1     | 3.58E-06 | 0.3773  | 0.73  | 0.62 | 0.05712  | HC_vs_MS.Trt_B |
| BMP1      | 3.59E-06 | -0.3526 | 0.535 | 0.38 | 0.057397 | HC_vs_MS.Trt_B |
| RNF10     | 3.60E-06 | 0.31563 | 0.807 | 0.7  | 0.057511 | HC_vs_MS.Trt_B |
| C2orf91   | 3.68E-06 | 0.27181 | 0.467 | 0.34 | 0.058842 | HC_vs_MS.Trt_B |
| RCHY1     | 3.73E-06 | 0.82176 | 0.309 | 0.19 | 0.059553 | HC_vs_MS.Trt_B |
| CERS4     | 3.73E-06 | 0.58254 | 0.613 | 0.48 | 0.059561 | HC_vs_MS.Trt_B |
| ZNF442    | 3.74E-06 | 0.32986 | 0.717 | 0.57 | 0.059688 | HC_vs_MS.Trt_B |
| SLC22A11  | 3.76E-06 | 0.25014 | 0.414 | 0.28 | 0.059979 | HC_vs_MS.Trt_B |
| ST3GAL3   | 3.83E-06 | 0.63151 | 0.793 | 0.65 | 0.061174 | HC_vs_MS.Trt_B |
| TSC2      | 3.86E-06 | 0.38923 | 0.684 | 0.53 | 0.061648 | HC_vs_MS.Trt_B |
| GLB1L3    | 3.86E-06 | 0.36848 | 0.7   | 0.59 | 0.061736 | HC_vs_MS.Trt_B |
| TMEM132A  | 3.87E-06 | 0.43063 | 0.384 | 0.25 | 0.061843 | HC_vs_MS.Trt_B |
| HEMK1     | 3.90E-06 | 0.25214 | 0.951 | 0.87 | 0.062347 | HC_vs_MS.Trt_B |
| CYB561D1  | 3.91E-06 | 0.58586 | 0.461 | 0.33 | 0.062495 | HC_vs_MS.Trt_B |
| NEK4      | 3.96E-06 | 0.33402 | 0.767 | 0.61 | 0.063247 | HC_vs_MS.Trt_B |
| HERC2     | 3.98E-06 | 0.46341 | 0.851 | 0.76 | 0.063526 | HC_vs_MS.Trt_B |
| TMBIM1    | 3.99E-06 | 0.33441 | 0.588 | 0.44 | 0.063701 | HC_vs_MS.Trt_B |
| C14orf159 | 4.03E-06 | 0.7636  | 0.638 | 0.53 | 0.064351 | HC_vs_MS.Trt_B |
| CSNK1G1   | 4.03E-06 | 0.27812 | 0.564 | 0.42 | 0.064409 | HC_vs_MS.Trt_B |
| RNF141    | 4.05E-06 | 0.40301 | 0.425 | 0.29 | 0.06472  | HC_vs_MS.Trt_B |
| FITM2     | 4.06E-06 | -0.4342 | 0.69  | 0.57 | 0.064898 | HC_vs_MS.Trt_B |
| SMIM5     | 4.07E-06 | 0.33011 | 0.304 | 0.19 | 0.064949 | HC_vs_MS.Trt_B |
| ARHGAP26  | 4.13E-06 | 0.29208 | 0.626 | 0.49 | 0.065941 | HC_vs_MS.Trt_B |
| LRRC28    | 4.16E-06 | 0.8068  | 0.512 | 0.38 | 0.066395 | HC_vs_MS.Trt_B |
| BRF1      | 4.16E-06 | 0.46707 | 0.565 | 0.44 | 0.066474 | HC_vs_MS.Trt_B |
| CDK11A    | 4.18E-06 | 0.27791 | 0.413 | 0.28 | 0.066737 | HC_vs_MS.Trt_B |
| TMEM25    | 4.21E-06 | 0.85362 | 0.394 | 0.25 | 0.067175 | HC_vs_MS.Trt_B |
| ARL16     | 4.29E-06 | 0.41688 | 0.745 | 0.61 | 0.06851  | HC_vs_MS.Trt_B |
| FGD5      | 4.41E-06 | 0.45145 | 0.525 | 0.38 | 0.07037  | HC_vs_MS.Trt_B |
| GDAP2     | 4.41E-06 | 0.51106 | 0.684 | 0.55 | 0.070424 | HC_vs_MS.Trt_B |



|            |          |         |       |      |          |                |
|------------|----------|---------|-------|------|----------|----------------|
| PPP1R12B   | 4.43E-06 | 0.4081  | 0.696 | 0.57 | 0.070699 | HC_vs_MS.Trt_B |
| CCND2      | 4.45E-06 | 0.62046 | 0.381 | 0.26 | 0.071052 | HC_vs_MS.Trt_B |
| TFB1M      | 4.47E-06 | 0.43591 | 0.422 | 0.3  | 0.071355 | HC_vs_MS.Trt_B |
| ACSS1      | 4.51E-06 | 1.19273 | 0.577 | 0.46 | 0.072097 | HC_vs_MS.Trt_B |
| NAA15      | 4.56E-06 | 0.35064 | 0.739 | 0.63 | 0.072858 | HC_vs_MS.Trt_B |
| GALNT10    | 4.57E-06 | 0.28159 | 0.53  | 0.4  | 0.072919 | HC_vs_MS.Trt_B |
| NOTCH2     | 4.66E-06 | 0.75117 | 0.204 | 0.1  | 0.074477 | HC_vs_MS.Trt_B |
| FBXW4      | 4.68E-06 | 0.47439 | 0.493 | 0.38 | 0.074785 | HC_vs_MS.Trt_B |
| C5orf42    | 4.69E-06 | -0.5987 | 0.51  | 0.39 | 0.074857 | HC_vs_MS.Trt_B |
| CCT6A      | 4.80E-06 | 0.31282 | 0.47  | 0.33 | 0.076678 | HC_vs_MS.Trt_B |
| RNF130     | 4.81E-06 | -0.9169 | 0.633 | 0.49 | 0.076815 | HC_vs_MS.Trt_B |
| PRKX       | 4.84E-06 | 0.35461 | 0.526 | 0.4  | 0.077295 | HC_vs_MS.Trt_B |
| PAXIP1     | 4.86E-06 | -0.8801 | 0.435 | 0.31 | 0.077578 | HC_vs_MS.Trt_B |
| GCM1       | 4.90E-06 | 0.3506  | 0.49  | 0.37 | 0.07823  | HC_vs_MS.Trt_B |
| PML        | 4.98E-06 | 0.42702 | 0.596 | 0.46 | 0.079519 | HC_vs_MS.Trt_B |
| TRAPPC2    | 4.98E-06 | -0.2728 | 0.917 | 0.83 | 0.079577 | HC_vs_MS.Trt_B |
| PTGIS      | 5.01E-06 | 0.26498 | 0.667 | 0.58 | 0.080066 | HC_vs_MS.Trt_B |
| CENPV      | 5.15E-06 | 0.41814 | 0.71  | 0.58 | 0.082187 | HC_vs_MS.Trt_B |
| IQCG       | 5.15E-06 | 0.51573 | 0.748 | 0.65 | 0.082319 | HC_vs_MS.Trt_B |
| EML6       | 5.21E-06 | 0.26064 | 0.578 | 0.46 | 0.083221 | HC_vs_MS.Trt_B |
| NVL        | 5.22E-06 | 0.32408 | 0.8   | 0.66 | 0.083417 | HC_vs_MS.Trt_B |
| ZNF589     | 5.23E-06 | 0.33004 | 0.459 | 0.33 | 0.083495 | HC_vs_MS.Trt_B |
| EFCAB12    | 5.24E-06 | 0.30125 | 0.745 | 0.62 | 0.083728 | HC_vs_MS.Trt_B |
| AKAP6      | 5.42E-06 | 0.39239 | 0.697 | 0.57 | 0.086535 | HC_vs_MS.Trt_B |
| RNF19A     | 5.42E-06 | 0.29247 | 0.412 | 0.28 | 0.08654  | HC_vs_MS.Trt_B |
| PABPC4     | 5.45E-06 | 0.33087 | 0.81  | 0.68 | 0.087112 | HC_vs_MS.Trt_B |
| UHRF1BP1   | 5.46E-06 | 0.84915 | 0.549 | 0.43 | 0.087236 | HC_vs_MS.Trt_B |
| KDELC2     | 5.64E-06 | 0.84532 | 0.554 | 0.44 | 0.090014 | HC_vs_MS.Trt_B |
| KIAA1958   | 5.66E-06 | 0.55873 | 0.699 | 0.57 | 0.090426 | HC_vs_MS.Trt_B |
| VEZT       | 5.73E-06 | -0.6806 | 0.742 | 0.59 | 0.091485 | HC_vs_MS.Trt_B |
| RPH3A      | 5.76E-06 | 0.25658 | 0.423 | 0.29 | 0.091945 | HC_vs_MS.Trt_B |
| PHLPP2     | 5.77E-06 | 0.67251 | 0.8   | 0.66 | 0.09218  | HC_vs_MS.Trt_B |
| SOX13      | 5.77E-06 | 0.2688  | 0.739 | 0.6  | 0.09218  | HC_vs_MS.Trt_B |
| QSOX1      | 5.83E-06 | 0.80665 | 0.37  | 0.25 | 0.093119 | HC_vs_MS.Trt_B |
| CTD-3088G3 | 5.88E-06 | -0.482  | 0.51  | 0.37 | 0.093921 | HC_vs_MS.Trt_B |
| BMP8B      | 5.88E-06 | 0.41152 | 0.403 | 0.28 | 0.093976 | HC_vs_MS.Trt_B |
| SLC46A1    | 5.90E-06 | 0.48274 | 0.484 | 0.36 | 0.094213 | HC_vs_MS.Trt_B |
| MYL6       | 5.94E-06 | -0.6745 | 0.594 | 0.68 | 0.094886 | HC_vs_MS.Trt_B |
| ST8SIA6    | 5.95E-06 | 0.7294  | 0.443 | 0.32 | 0.095044 | HC_vs_MS.Trt_B |
| ZNF606     | 5.95E-06 | 0.40715 | 0.775 | 0.69 | 0.095106 | HC_vs_MS.Trt_B |

|          |          |         |       |      |          |                |
|----------|----------|---------|-------|------|----------|----------------|
| BORCS5   | 5.97E-06 | 0.6641  | 0.629 | 0.49 | 0.095337 | HC_vs_MS.Trt_B |
| PPP5C    | 5.98E-06 | 0.40718 | 0.397 | 0.27 | 0.095589 | HC_vs_MS.Trt_B |
| HDAC2    | 5.99E-06 | -0.4334 | 0.713 | 0.56 | 0.095696 | HC_vs_MS.Trt_B |
| MICU1    | 5.99E-06 | 0.32812 | 0.642 | 0.53 | 0.095745 | HC_vs_MS.Trt_B |
| MOB1B    | 6.07E-06 | 0.4521  | 0.61  | 0.47 | 0.096899 | HC_vs_MS.Trt_B |
| LRFN3    | 6.09E-06 | 0.34451 | 0.617 | 0.47 | 0.097268 | HC_vs_MS.Trt_B |
| KCNJ15   | 6.14E-06 | 0.46615 | 0.588 | 0.49 | 0.098009 | HC_vs_MS.Trt_B |
| RBM48    | 6.17E-06 | -0.4222 | 0.755 | 0.61 | 0.098515 | HC_vs_MS.Trt_B |
| SKIDA1   | 6.22E-06 | 0.26425 | 0.404 | 0.28 | 0.099417 | HC_vs_MS.Trt_B |
| UBE2O    | 6.30E-06 | 0.38097 | 0.545 | 0.38 | 0.100556 | HC_vs_MS.Trt_B |
| PIAS2    | 6.32E-06 | 0.34925 | 0.777 | 0.68 | 0.100883 | HC_vs_MS.Trt_B |
| CCDC88B  | 6.32E-06 | 0.41186 | 0.759 | 0.63 | 0.100893 | HC_vs_MS.Trt_B |
| NUP210   | 6.32E-06 | 0.255   | 0.52  | 0.38 | 0.100896 | HC_vs_MS.Trt_B |
| NCKAP5L  | 6.32E-06 | 0.51936 | 0.593 | 0.46 | 0.1009   | HC_vs_MS.Trt_B |
| MRPL30   | 6.32E-06 | -0.3963 | 0.781 | 0.66 | 0.10094  | HC_vs_MS.Trt_B |
| RPL10A   | 6.33E-06 | -0.3733 | 0.851 | 0.82 | 0.101156 | HC_vs_MS.Trt_B |
| ZNF557   | 6.34E-06 | -0.4972 | 0.857 | 0.76 | 0.101327 | HC_vs_MS.Trt_B |
| QRSL1    | 6.36E-06 | -0.5385 | 0.555 | 0.41 | 0.101627 | HC_vs_MS.Trt_B |
| ZC3H7A   | 6.37E-06 | 0.52456 | 0.383 | 0.26 | 0.101687 | HC_vs_MS.Trt_B |
| AK7      | 6.44E-06 | 0.25714 | 0.793 | 0.69 | 0.102873 | HC_vs_MS.Trt_B |
| ZNF583   | 6.52E-06 | 0.48118 | 0.803 | 0.71 | 0.104107 | HC_vs_MS.Trt_B |
| TRIM24   | 6.52E-06 | -0.2805 | 0.458 | 0.33 | 0.10411  | HC_vs_MS.Trt_B |
| SLC38A6  | 6.52E-06 | 0.27065 | 0.643 | 0.5  | 0.104194 | HC_vs_MS.Trt_B |
| ABCA6    | 6.54E-06 | 0.25001 | 0.63  | 0.5  | 0.104515 | HC_vs_MS.Trt_B |
| SERINC3  | 6.55E-06 | 0.33069 | 0.661 | 0.54 | 0.104551 | HC_vs_MS.Trt_B |
| NEB      | 6.58E-06 | 0.97854 | 0.532 | 0.4  | 0.105034 | HC_vs_MS.Trt_B |
| SLC4A1AP | 6.59E-06 | -0.3138 | 0.761 | 0.67 | 0.10533  | HC_vs_MS.Trt_B |
| SLC36A3  | 6.60E-06 | 0.29193 | 0.441 | 0.33 | 0.105438 | HC_vs_MS.Trt_B |
| ATP8B1   | 6.62E-06 | 0.50197 | 0.265 | 0.15 | 0.105809 | HC_vs_MS.Trt_B |
| SH2B1    | 6.63E-06 | 0.38192 | 0.57  | 0.46 | 0.105855 | HC_vs_MS.Trt_B |
| HNRNPUL1 | 6.65E-06 | 0.63046 | 0.688 | 0.58 | 0.106234 | HC_vs_MS.Trt_B |
| AGO2     | 6.69E-06 | 0.26057 | 0.413 | 0.29 | 0.106792 | HC_vs_MS.Trt_B |
| C9orf66  | 6.75E-06 | 0.37985 | 0.574 | 0.44 | 0.107808 | HC_vs_MS.Trt_B |
| LMLN     | 6.83E-06 | -0.6926 | 0.435 | 0.3  | 0.109142 | HC_vs_MS.Trt_B |
| NOM1     | 6.87E-06 | 0.60772 | 0.614 | 0.53 | 0.109674 | HC_vs_MS.Trt_B |
| ATAD5    | 6.94E-06 | -0.6757 | 0.601 | 0.43 | 0.110778 | HC_vs_MS.Trt_B |
| TGFB1    | 7.00E-06 | 0.49643 | 0.316 | 0.2  | 0.111877 | HC_vs_MS.Trt_B |
| RPF2     | 7.01E-06 | 0.58731 | 0.304 | 0.19 | 0.11199  | HC_vs_MS.Trt_B |
| LEMD3    | 7.09E-06 | 0.49405 | 0.636 | 0.5  | 0.113224 | HC_vs_MS.Trt_B |
| PTMA     | 7.16E-06 | -0.3753 | 0.941 | 0.91 | 0.114289 | HC_vs_MS.Trt_B |

|          |          |         |       |      |          |                |
|----------|----------|---------|-------|------|----------|----------------|
| VPS13C   | 7.16E-06 | 0.29358 | 0.751 | 0.63 | 0.114435 | HC_vs_MS.Trt_B |
| SIMC1    | 7.17E-06 | 0.78937 | 0.42  | 0.3  | 0.114482 | HC_vs_MS.Trt_B |
| C2orf74  | 7.18E-06 | 0.30098 | 0.457 | 0.32 | 0.114659 | HC_vs_MS.Trt_B |
| SURF6    | 7.23E-06 | 0.34946 | 0.517 | 0.38 | 0.115503 | HC_vs_MS.Trt_B |
| GRAMD1A  | 7.28E-06 | -0.352  | 0.716 | 0.54 | 0.116205 | HC_vs_MS.Trt_B |
| DYDC1    | 7.34E-06 | 0.26731 | 0.584 | 0.45 | 0.117294 | HC_vs_MS.Trt_B |
| SVIP     | 7.38E-06 | 0.33971 | 0.535 | 0.39 | 0.117939 | HC_vs_MS.Trt_B |
| SLC2A3   | 7.40E-06 | 0.59648 | 0.732 | 0.63 | 0.118248 | HC_vs_MS.Trt_B |
| ARL5A    | 7.42E-06 | 0.57554 | 0.187 | 0.09 | 0.118487 | HC_vs_MS.Trt_B |
| TERF2IP  | 7.48E-06 | 0.66756 | 0.378 | 0.26 | 0.119425 | HC_vs_MS.Trt_B |
| EMCN     | 7.52E-06 | 0.40711 | 0.438 | 0.31 | 0.12016  | HC_vs_MS.Trt_B |
| CTDSPL   | 7.54E-06 | 0.3915  | 0.235 | 0.13 | 0.12038  | HC_vs_MS.Trt_B |
| BPIFB1   | 7.55E-06 | 0.2645  | 0.507 | 0.37 | 0.120607 | HC_vs_MS.Trt_B |
| RUVBL2   | 7.59E-06 | -0.3135 | 0.854 | 0.72 | 0.121198 | HC_vs_MS.Trt_B |
| EDC3     | 7.59E-06 | 0.38002 | 0.387 | 0.27 | 0.121201 | HC_vs_MS.Trt_B |
| ATXN10   | 7.65E-06 | 0.29128 | 0.48  | 0.34 | 0.122126 | HC_vs_MS.Trt_B |
| GPR85    | 7.80E-06 | 0.54682 | 0.388 | 0.27 | 0.124525 | HC_vs_MS.Trt_B |
| DLG1     | 7.81E-06 | 0.38391 | 0.581 | 0.46 | 0.124771 | HC_vs_MS.Trt_B |
| SIPA1L1  | 7.82E-06 | 0.8861  | 0.594 | 0.44 | 0.124873 | HC_vs_MS.Trt_B |
| CSNK2A2  | 7.84E-06 | 0.64683 | 0.27  | 0.16 | 0.125189 | HC_vs_MS.Trt_B |
| ZNF66    | 7.84E-06 | -0.8421 | 0.648 | 0.49 | 0.125217 | HC_vs_MS.Trt_B |
| POLQ     | 7.94E-06 | 0.26721 | 0.545 | 0.41 | 0.126876 | HC_vs_MS.Trt_B |
| WDR91    | 7.95E-06 | 0.34286 | 0.477 | 0.36 | 0.126998 | HC_vs_MS.Trt_B |
| MCOLN2   | 8.00E-06 | -0.5478 | 0.446 | 0.32 | 0.127777 | HC_vs_MS.Trt_B |
| NBPF9    | 8.00E-06 | 0.25974 | 0.709 | 0.58 | 0.127838 | HC_vs_MS.Trt_B |
| XKR4     | 8.03E-06 | 0.32969 | 0.542 | 0.42 | 0.128266 | HC_vs_MS.Trt_B |
| PLXDC1   | 8.09E-06 | 0.54245 | 0.729 | 0.62 | 0.12926  | HC_vs_MS.Trt_B |
| REPS2    | 8.15E-06 | 0.26168 | 0.606 | 0.47 | 0.130238 | HC_vs_MS.Trt_B |
| SUGP2    | 8.19E-06 | -0.3746 | 0.709 | 0.59 | 0.130879 | HC_vs_MS.Trt_B |
| C15orf52 | 8.19E-06 | 1.09025 | 0.414 | 0.29 | 0.130898 | HC_vs_MS.Trt_B |
| LRRC58   | 8.21E-06 | 0.52646 | 0.716 | 0.6  | 0.131076 | HC_vs_MS.Trt_B |
| ACSS3    | 8.21E-06 | 0.42771 | 0.267 | 0.16 | 0.131194 | HC_vs_MS.Trt_B |
| HILPDA   | 8.28E-06 | 0.28994 | 0.593 | 0.47 | 0.132327 | HC_vs_MS.Trt_B |
| SLC35B4  | 8.39E-06 | 0.27242 | 0.533 | 0.43 | 0.134089 | HC_vs_MS.Trt_B |
| STIL     | 8.42E-06 | -0.6833 | 0.607 | 0.5  | 0.134537 | HC_vs_MS.Trt_B |
| SAMD4A   | 8.46E-06 | 0.48988 | 0.584 | 0.44 | 0.135088 | HC_vs_MS.Trt_B |
| YTHDF3   | 8.51E-06 | 0.26964 | 0.642 | 0.51 | 0.135972 | HC_vs_MS.Trt_B |
| P4HB     | 8.60E-06 | 0.35833 | 0.654 | 0.52 | 0.137307 | HC_vs_MS.Trt_B |
| MYLK     | 8.61E-06 | -0.6971 | 0.562 | 0.41 | 0.137531 | HC_vs_MS.Trt_B |
| NME7     | 8.63E-06 | 0.45417 | 0.622 | 0.49 | 0.137846 | HC_vs_MS.Trt_B |

|          |          |         |       |      |          |                |
|----------|----------|---------|-------|------|----------|----------------|
| TCOF1    | 8.65E-06 | -0.4037 | 0.79  | 0.64 | 0.138171 | HC_vs_MS.Trt_B |
| IL1RAP   | 8.76E-06 | 0.25772 | 0.658 | 0.53 | 0.139851 | HC_vs_MS.Trt_B |
| CHST5    | 8.76E-06 | 0.25472 | 0.457 | 0.34 | 0.139895 | HC_vs_MS.Trt_B |
| BRD2     | 8.78E-06 | 0.58357 | 0.546 | 0.43 | 0.140193 | HC_vs_MS.Trt_B |
| GANC     | 8.98E-06 | 0.32006 | 0.607 | 0.48 | 0.143374 | HC_vs_MS.Trt_B |
| RPH3AL   | 9.00E-06 | 0.93043 | 0.32  | 0.21 | 0.143813 | HC_vs_MS.Trt_B |
| POLM     | 9.20E-06 | 0.39826 | 0.533 | 0.4  | 0.146986 | HC_vs_MS.Trt_B |
| KMT2E    | 9.23E-06 | 0.39617 | 0.767 | 0.65 | 0.147495 | HC_vs_MS.Trt_B |
| PRICKLE3 | 9.24E-06 | 0.41542 | 0.51  | 0.38 | 0.147559 | HC_vs_MS.Trt_B |
| ARSK     | 9.30E-06 | -0.301  | 0.538 | 0.42 | 0.148492 | HC_vs_MS.Trt_B |
| KATNAL1  | 9.39E-06 | -0.6377 | 0.523 | 0.41 | 0.150056 | HC_vs_MS.Trt_B |
| DDX52    | 9.41E-06 | -0.3561 | 0.871 | 0.78 | 0.150232 | HC_vs_MS.Trt_B |
| DHX30    | 9.44E-06 | 0.35774 | 0.639 | 0.52 | 0.150726 | HC_vs_MS.Trt_B |
| GNG4     | 9.49E-06 | 0.37724 | 0.677 | 0.55 | 0.151562 | HC_vs_MS.Trt_B |
| FBXO5    | 9.66E-06 | -0.8961 | 0.401 | 0.27 | 0.154234 | HC_vs_MS.Trt_B |
| DST      | 9.66E-06 | 0.34838 | 0.755 | 0.61 | 0.154288 | HC_vs_MS.Trt_B |
| AP2A2    | 9.67E-06 | 0.32601 | 0.616 | 0.49 | 0.154466 | HC_vs_MS.Trt_B |
| DMD      | 9.74E-06 | 0.34711 | 0.619 | 0.49 | 0.155609 | HC_vs_MS.Trt_B |
| ATP2A2   | 9.89E-06 | 0.9769  | 0.694 | 0.63 | 0.158022 | HC_vs_MS.Trt_B |
| WDR89    | 1.01E-05 | 0.55675 | 0.362 | 0.23 | 0.160774 | HC_vs_MS.Trt_B |
| SCGB3A2  | 1.01E-05 | 0.3445  | 0.28  | 0.17 | 0.160829 | HC_vs_MS.Trt_B |
| ANKRD45  | 1.01E-05 | 0.27094 | 0.543 | 0.43 | 0.161276 | HC_vs_MS.Trt_B |
| GPBP1L1  | 1.02E-05 | 0.75168 | 0.458 | 0.34 | 0.16258  | HC_vs_MS.Trt_B |
| TRAPPC12 | 1.02E-05 | 0.31578 | 0.599 | 0.46 | 0.162626 | HC_vs_MS.Trt_B |
| CD6      | 1.02E-05 | 0.37504 | 0.641 | 0.51 | 0.163664 | HC_vs_MS.Trt_B |
| NCAPH2   | 1.03E-05 | 0.70122 | 0.686 | 0.61 | 0.16411  | HC_vs_MS.Trt_B |
| EIF2D    | 1.03E-05 | -0.5313 | 0.716 | 0.57 | 0.164413 | HC_vs_MS.Trt_B |
| CCDC25   | 1.04E-05 | -0.5801 | 0.286 | 0.17 | 0.165586 | HC_vs_MS.Trt_B |
| MOK      | 1.04E-05 | 0.27935 | 0.79  | 0.66 | 0.166113 | HC_vs_MS.Trt_B |
| OAS1     | 1.06E-05 | 0.56401 | 0.503 | 0.41 | 0.168608 | HC_vs_MS.Trt_B |
| PSMB2    | 1.06E-05 | 0.28827 | 0.733 | 0.6  | 0.168672 | HC_vs_MS.Trt_B |
| MCOLN3   | 1.06E-05 | 0.25787 | 0.467 | 0.33 | 0.168723 | HC_vs_MS.Trt_B |
| TMPO     | 1.06E-05 | 0.30317 | 0.535 | 0.41 | 0.16896  | HC_vs_MS.Trt_B |
| NSUN4    | 1.06E-05 | 0.32183 | 0.755 | 0.63 | 0.169274 | HC_vs_MS.Trt_B |
| ABHD12B  | 1.07E-05 | 0.44673 | 0.614 | 0.48 | 0.170262 | HC_vs_MS.Trt_B |
| TRMT2B   | 1.07E-05 | 0.53997 | 0.625 | 0.49 | 0.170466 | HC_vs_MS.Trt_B |
| FAM134C  | 1.07E-05 | 0.36768 | 0.604 | 0.48 | 0.170843 | HC_vs_MS.Trt_B |
| TMEM231  | 1.08E-05 | 0.28014 | 0.709 | 0.58 | 0.172758 | HC_vs_MS.Trt_B |
| POLL     | 1.09E-05 | 0.48324 | 0.404 | 0.28 | 0.17342  | HC_vs_MS.Trt_B |
| ZNF429   | 1.11E-05 | 0.3757  | 0.903 | 0.82 | 0.176757 | HC_vs_MS.Trt_B |

|             |          |         |       |      |          |                |
|-------------|----------|---------|-------|------|----------|----------------|
| EIF1AD      | 1.11E-05 | -0.3192 | 0.693 | 0.57 | 0.177626 | HC_vs_MS.Trt_B |
| WDR17       | 1.11E-05 | 0.37204 | 0.716 | 0.57 | 0.177733 | HC_vs_MS.Trt_B |
| SIN3A       | 1.12E-05 | 0.26433 | 0.783 | 0.66 | 0.178738 | HC_vs_MS.Trt_B |
| RAB5B       | 1.12E-05 | 0.40745 | 0.864 | 0.79 | 0.179079 | HC_vs_MS.Trt_B |
| ZNF585B     | 1.12E-05 | 0.31127 | 0.723 | 0.6  | 0.179112 | HC_vs_MS.Trt_B |
| KIF3B       | 1.14E-05 | 0.92048 | 0.438 | 0.33 | 0.181869 | HC_vs_MS.Trt_B |
| PTGIR       | 1.15E-05 | -0.3621 | 0.671 | 0.54 | 0.183732 | HC_vs_MS.Trt_B |
| TRMT12      | 1.15E-05 | 0.36294 | 0.394 | 0.27 | 0.18398  | HC_vs_MS.Trt_B |
| POTEC       | 1.15E-05 | 0.41331 | 0.406 | 0.28 | 0.183993 | HC_vs_MS.Trt_B |
| GCLM        | 1.16E-05 | 0.49938 | 0.672 | 0.58 | 0.184637 | HC_vs_MS.Trt_B |
| ACBD5       | 1.17E-05 | -0.3168 | 0.467 | 0.34 | 0.186597 | HC_vs_MS.Trt_B |
| NEDD9       | 1.18E-05 | 0.74007 | 0.467 | 0.33 | 0.187825 | HC_vs_MS.Trt_B |
| IFRD1       | 1.18E-05 | 0.80514 | 0.387 | 0.26 | 0.188272 | HC_vs_MS.Trt_B |
| NUP188      | 1.18E-05 | 0.52844 | 0.526 | 0.41 | 0.188555 | HC_vs_MS.Trt_B |
| BCAS3       | 1.19E-05 | 0.40161 | 0.823 | 0.74 | 0.189769 | HC_vs_MS.Trt_B |
| ATP6V1E1    | 1.20E-05 | -0.2699 | 0.632 | 0.47 | 0.191423 | HC_vs_MS.Trt_B |
| ZZEF1       | 1.21E-05 | 0.42552 | 0.501 | 0.36 | 0.19333  | HC_vs_MS.Trt_B |
| SOAT1       | 1.21E-05 | 0.32511 | 0.7   | 0.61 | 0.193388 | HC_vs_MS.Trt_B |
| TESC        | 1.22E-05 | 0.47758 | 0.232 | 0.13 | 0.194139 | HC_vs_MS.Trt_B |
| CH507-9B2.1 | 1.22E-05 | 0.3106  | 0.403 | 0.28 | 0.194426 | HC_vs_MS.Trt_B |
| FAM71D      | 1.22E-05 | 0.54279 | 0.12  | 0.05 | 0.195298 | HC_vs_MS.Trt_B |
| ILF3        | 1.22E-05 | 0.28598 | 0.749 | 0.65 | 0.19531  | HC_vs_MS.Trt_B |
| SIGLEC11    | 1.22E-05 | 0.32556 | 0.548 | 0.42 | 0.195469 | HC_vs_MS.Trt_B |
| RFX3        | 1.23E-05 | 0.25691 | 0.194 | 0.1  | 0.196485 | HC_vs_MS.Trt_B |
| RP11-166B2  | 1.24E-05 | 0.38469 | 0.507 | 0.38 | 0.198027 | HC_vs_MS.Trt_B |
| CCDC171     | 1.25E-05 | 0.40193 | 0.462 | 0.34 | 0.199495 | HC_vs_MS.Trt_B |
| EIF2AK1     | 1.26E-05 | 0.5262  | 0.454 | 0.33 | 0.201014 | HC_vs_MS.Trt_B |
| EXOSC6      | 1.26E-05 | -0.2961 | 0.901 | 0.82 | 0.201648 | HC_vs_MS.Trt_B |
| TYK2        | 1.27E-05 | 0.29262 | 0.659 | 0.53 | 0.202563 | HC_vs_MS.Trt_B |
| FOXRED2     | 1.29E-05 | 0.29407 | 0.529 | 0.4  | 0.206344 | HC_vs_MS.Trt_B |
| FBXW12      | 1.29E-05 | 0.43211 | 0.323 | 0.21 | 0.206609 | HC_vs_MS.Trt_B |
| SULT1C4     | 1.29E-05 | 0.37063 | 0.554 | 0.46 | 0.206757 | HC_vs_MS.Trt_B |
| ANKRD54     | 1.30E-05 | 0.33709 | 0.693 | 0.56 | 0.207541 | HC_vs_MS.Trt_B |
| CYTH1       | 1.31E-05 | 0.26955 | 0.578 | 0.46 | 0.210022 | HC_vs_MS.Trt_B |
| PLCE1       | 1.32E-05 | -0.2655 | 0.916 | 0.8  | 0.210698 | HC_vs_MS.Trt_B |
| HEBP1       | 1.32E-05 | 1.00189 | 0.262 | 0.15 | 0.211564 | HC_vs_MS.Trt_B |
| IRAK4       | 1.34E-05 | -0.5861 | 0.594 | 0.47 | 0.214565 | HC_vs_MS.Trt_B |
| ZNF215      | 1.36E-05 | 0.36914 | 0.397 | 0.28 | 0.217578 | HC_vs_MS.Trt_B |
| GDF11       | 1.37E-05 | 0.26817 | 0.325 | 0.22 | 0.21921  | HC_vs_MS.Trt_B |
| RUNDC3B     | 1.38E-05 | 0.43209 | 0.309 | 0.2  | 0.2197   | HC_vs_MS.Trt_B |

|          |          |         |       |      |          |                |
|----------|----------|---------|-------|------|----------|----------------|
| TFAP4    | 1.38E-05 | 0.31608 | 0.671 | 0.55 | 0.219887 | HC_vs_MS.Trt_B |
| WBSCR17  | 1.38E-05 | 0.30045 | 0.314 | 0.2  | 0.220674 | HC_vs_MS.Trt_B |
| KIAA0100 | 1.42E-05 | 0.57648 | 0.497 | 0.38 | 0.226584 | HC_vs_MS.Trt_B |
| ZNF626   | 1.42E-05 | -0.436  | 0.703 | 0.59 | 0.227088 | HC_vs_MS.Trt_B |
| BTG2     | 1.43E-05 | 0.82726 | 0.178 | 0.09 | 0.228024 | HC_vs_MS.Trt_B |
| XPO5     | 1.45E-05 | 0.38795 | 0.688 | 0.54 | 0.231183 | HC_vs_MS.Trt_B |
| SLC16A7  | 1.46E-05 | 0.80109 | 0.628 | 0.51 | 0.232784 | HC_vs_MS.Trt_B |
| GNAL     | 1.47E-05 | -0.353  | 0.443 | 0.32 | 0.234383 | HC_vs_MS.Trt_B |
| HAPLN4   | 1.47E-05 | 0.27289 | 0.417 | 0.29 | 0.234468 | HC_vs_MS.Trt_B |
| RSPRY1   | 1.47E-05 | -0.3076 | 0.335 | 0.22 | 0.235331 | HC_vs_MS.Trt_B |
| PIK3C2A  | 1.47E-05 | 1.03873 | 0.386 | 0.27 | 0.235389 | HC_vs_MS.Trt_B |
| CLUAP1   | 1.48E-05 | -0.2609 | 0.825 | 0.68 | 0.235686 | HC_vs_MS.Trt_B |
| HIBCH    | 1.51E-05 | 0.63056 | 0.245 | 0.14 | 0.240596 | HC_vs_MS.Trt_B |
| RPTOR    | 1.51E-05 | 0.28476 | 0.378 | 0.25 | 0.241522 | HC_vs_MS.Trt_B |
| CHD3     | 1.51E-05 | 0.38949 | 0.365 | 0.24 | 0.241979 | HC_vs_MS.Trt_B |
| TBC1D4   | 1.53E-05 | 0.4027  | 0.354 | 0.24 | 0.243641 | HC_vs_MS.Trt_B |
| DHX15    | 1.53E-05 | -0.2956 | 0.514 | 0.38 | 0.244856 | HC_vs_MS.Trt_B |
| DHX57    | 1.54E-05 | -0.6017 | 0.555 | 0.41 | 0.245883 | HC_vs_MS.Trt_B |
| ZNF543   | 1.54E-05 | -0.4708 | 0.477 | 0.34 | 0.246091 | HC_vs_MS.Trt_B |
| PPIL6    | 1.54E-05 | 0.29291 | 0.497 | 0.39 | 0.246682 | HC_vs_MS.Trt_B |
| CDH6     | 1.56E-05 | 0.2623  | 0.506 | 0.39 | 0.248596 | HC_vs_MS.Trt_B |
| PARVA    | 1.56E-05 | 0.30594 | 0.719 | 0.6  | 0.248761 | HC_vs_MS.Trt_B |
| CECR1    | 1.57E-05 | 0.40667 | 0.486 | 0.36 | 0.250124 | HC_vs_MS.Trt_B |
| TAPT1    | 1.57E-05 | 0.65928 | 0.684 | 0.56 | 0.251281 | HC_vs_MS.Trt_B |
| DGAT2    | 1.58E-05 | 0.26616 | 0.306 | 0.2  | 0.252202 | HC_vs_MS.Trt_B |
| CREBRF   | 1.58E-05 | 0.49213 | 0.768 | 0.63 | 0.252514 | HC_vs_MS.Trt_B |
| TRANK1   | 1.60E-05 | 0.80539 | 0.246 | 0.14 | 0.255427 | HC_vs_MS.Trt_B |
| SPATA4   | 1.63E-05 | 0.29071 | 0.587 | 0.49 | 0.261064 | HC_vs_MS.Trt_B |
| ST8SIA1  | 1.64E-05 | -0.3305 | 0.625 | 0.47 | 0.261425 | HC_vs_MS.Trt_B |
| SOWAHC   | 1.64E-05 | 0.48965 | 0.42  | 0.31 | 0.261756 | HC_vs_MS.Trt_B |
| DTX2     | 1.66E-05 | 0.54674 | 0.394 | 0.28 | 0.264532 | HC_vs_MS.Trt_B |
| AGMAT    | 1.66E-05 | 0.26557 | 0.848 | 0.77 | 0.265126 | HC_vs_MS.Trt_B |
| PTGES    | 1.67E-05 | 0.30559 | 0.481 | 0.36 | 0.267157 | HC_vs_MS.Trt_B |
| CLEC2B   | 1.68E-05 | 0.45601 | 0.209 | 0.11 | 0.26763  | HC_vs_MS.Trt_B |
| SMAGP    | 1.68E-05 | 0.37454 | 0.639 | 0.51 | 0.267639 | HC_vs_MS.Trt_B |
| UVRAG    | 1.68E-05 | 0.43889 | 0.423 | 0.3  | 0.267991 | HC_vs_MS.Trt_B |
| FNDC3A   | 1.69E-05 | 0.35987 | 0.484 | 0.37 | 0.269538 | HC_vs_MS.Trt_B |
| MPI      | 1.69E-05 | 0.3728  | 0.513 | 0.38 | 0.270638 | HC_vs_MS.Trt_B |
| MRPS17   | 1.72E-05 | 0.27152 | 0.845 | 0.77 | 0.274417 | HC_vs_MS.Trt_B |
| DHDDS    | 1.73E-05 | 0.38508 | 0.543 | 0.41 | 0.276185 | HC_vs_MS.Trt_B |

|            |          |         |       |      |          |                |
|------------|----------|---------|-------|------|----------|----------------|
| GSDMB      | 1.74E-05 | 0.29659 | 0.862 | 0.76 | 0.277275 | HC_vs_MS.Trt_B |
| RAB2B      | 1.75E-05 | 0.303   | 0.652 | 0.53 | 0.278842 | HC_vs_MS.Trt_B |
| PLIN3      | 1.76E-05 | -0.2518 | 0.519 | 0.36 | 0.280442 | HC_vs_MS.Trt_B |
| KMT2D      | 1.78E-05 | 0.29782 | 0.855 | 0.74 | 0.284807 | HC_vs_MS.Trt_B |
| AC013264.1 | 1.78E-05 | 0.52092 | 0.336 | 0.23 | 0.285014 | HC_vs_MS.Trt_B |
| FBXO24     | 1.79E-05 | 0.37097 | 0.423 | 0.29 | 0.286621 | HC_vs_MS.Trt_B |
| ALMS1      | 1.81E-05 | 1.13165 | 0.461 | 0.34 | 0.288474 | HC_vs_MS.Trt_B |
| ZNF343     | 1.81E-05 | 1.62168 | 0.433 | 0.31 | 0.288998 | HC_vs_MS.Trt_B |
| RGCC       | 1.83E-05 | 0.74061 | 0.18  | 0.09 | 0.292004 | HC_vs_MS.Trt_B |
| RFC2       | 1.84E-05 | -0.3893 | 0.736 | 0.58 | 0.293781 | HC_vs_MS.Trt_B |
| PAPSS1     | 1.84E-05 | 0.4209  | 0.199 | 0.1  | 0.294077 | HC_vs_MS.Trt_B |
| SDHD       | 1.85E-05 | -0.2795 | 0.654 | 0.51 | 0.296027 | HC_vs_MS.Trt_B |
| ZNF419     | 1.85E-05 | -0.3555 | 0.758 | 0.66 | 0.296058 | HC_vs_MS.Trt_B |
| MGP        | 1.87E-05 | 0.28845 | 0.523 | 0.42 | 0.298724 | HC_vs_MS.Trt_B |
| AARS2      | 1.87E-05 | 1.4205  | 0.384 | 0.28 | 0.299368 | HC_vs_MS.Trt_B |
| PPFIBP1    | 1.89E-05 | 0.41085 | 0.735 | 0.6  | 0.301761 | HC_vs_MS.Trt_B |
| BEAN1      | 1.91E-05 | -0.5996 | 0.422 | 0.29 | 0.305035 | HC_vs_MS.Trt_B |
| ACTR3B     | 1.92E-05 | 1.16226 | 0.493 | 0.38 | 0.307379 | HC_vs_MS.Trt_B |
| EGLN1      | 1.94E-05 | 1.05849 | 0.354 | 0.24 | 0.309803 | HC_vs_MS.Trt_B |
| MB21D1     | 1.95E-05 | 0.28594 | 0.72  | 0.59 | 0.310742 | HC_vs_MS.Trt_B |
| LRRC27     | 1.95E-05 | 0.25834 | 0.803 | 0.66 | 0.311278 | HC_vs_MS.Trt_B |
| ZC3H12B    | 1.96E-05 | 0.57106 | 0.552 | 0.43 | 0.312436 | HC_vs_MS.Trt_B |
| PTPRA      | 1.96E-05 | 0.98554 | 0.164 | 0.08 | 0.313459 | HC_vs_MS.Trt_B |
| UGDH       | 1.97E-05 | 0.51565 | 0.528 | 0.42 | 0.314421 | HC_vs_MS.Trt_B |
| NEK2       | 1.97E-05 | 0.30092 | 0.629 | 0.53 | 0.314493 | HC_vs_MS.Trt_B |
| TBC1D7     | 1.98E-05 | 0.61347 | 0.513 | 0.39 | 0.315568 | HC_vs_MS.Trt_B |
| ZNF587B    | 2.00E-05 | 0.29855 | 0.336 | 0.22 | 0.319056 | HC_vs_MS.Trt_B |
| C16orf89   | 2.00E-05 | 0.29001 | 0.27  | 0.17 | 0.319304 | HC_vs_MS.Trt_B |
| NOXO1      | 2.01E-05 | 0.35671 | 0.159 | 0.08 | 0.320917 | HC_vs_MS.Trt_B |
| SPAG16     | 2.01E-05 | -0.4353 | 0.441 | 0.31 | 0.321756 | HC_vs_MS.Trt_B |
| SLC4A5     | 2.02E-05 | 0.28902 | 0.7   | 0.56 | 0.321983 | HC_vs_MS.Trt_B |
| TRIM13     | 2.02E-05 | 0.35803 | 0.604 | 0.48 | 0.322039 | HC_vs_MS.Trt_B |
| KDM4B      | 2.02E-05 | 0.60649 | 0.594 | 0.49 | 0.32218  | HC_vs_MS.Trt_B |
| ZNF44      | 2.02E-05 | -0.3971 | 0.535 | 0.4  | 0.322526 | HC_vs_MS.Trt_B |
| SNX1       | 2.02E-05 | 0.39592 | 0.733 | 0.64 | 0.322727 | HC_vs_MS.Trt_B |
| ERVW-1     | 2.05E-05 | 0.64506 | 0.365 | 0.25 | 0.327347 | HC_vs_MS.Trt_B |
| TIMM23B    | 2.05E-05 | 0.6082  | 0.581 | 0.46 | 0.327742 | HC_vs_MS.Trt_B |
| C22orf46   | 2.10E-05 | 0.72002 | 0.364 | 0.25 | 0.334756 | HC_vs_MS.Trt_B |
| CXXC5      | 2.11E-05 | 0.81798 | 0.504 | 0.37 | 0.336471 | HC_vs_MS.Trt_B |
| ZNF519     | 2.11E-05 | 0.28465 | 0.867 | 0.72 | 0.337188 | HC_vs_MS.Trt_B |

|           |          |         |       |      |          |                |
|-----------|----------|---------|-------|------|----------|----------------|
| UBE2V2    | 2.14E-05 | -0.5277 | 0.722 | 0.62 | 0.342154 | HC_vs_MS.Trt_B |
| GPR157    | 2.15E-05 | 0.27325 | 0.786 | 0.68 | 0.3427   | HC_vs_MS.Trt_B |
| NOL6      | 2.21E-05 | 0.83693 | 0.372 | 0.28 | 0.352963 | HC_vs_MS.Trt_B |
| SREK1IP1  | 2.21E-05 | 0.461   | 0.41  | 0.29 | 0.353621 | HC_vs_MS.Trt_B |
| PDZD7     | 2.22E-05 | 0.26144 | 0.483 | 0.34 | 0.354099 | HC_vs_MS.Trt_B |
| FUCA2     | 2.25E-05 | 0.35192 | 0.296 | 0.18 | 0.358611 | HC_vs_MS.Trt_B |
| PICK1     | 2.26E-05 | -0.7386 | 0.429 | 0.32 | 0.360801 | HC_vs_MS.Trt_B |
| IRAK3     | 2.27E-05 | 0.64534 | 0.413 | 0.28 | 0.361879 | HC_vs_MS.Trt_B |
| CNDP2     | 2.29E-05 | 0.32547 | 0.684 | 0.55 | 0.365248 | HC_vs_MS.Trt_B |
| APAF1     | 2.30E-05 | 0.30498 | 0.572 | 0.44 | 0.367131 | HC_vs_MS.Trt_B |
| RNF220    | 2.33E-05 | 0.28416 | 0.641 | 0.53 | 0.3721   | HC_vs_MS.Trt_B |
| GFI1B     | 2.35E-05 | 0.3919  | 0.541 | 0.43 | 0.375307 | HC_vs_MS.Trt_B |
| SV2B      | 2.35E-05 | 0.65918 | 0.383 | 0.26 | 0.376004 | HC_vs_MS.Trt_B |
| CLASP2    | 2.35E-05 | 0.70752 | 0.7   | 0.56 | 0.376148 | HC_vs_MS.Trt_B |
| APPBP2    | 2.38E-05 | 0.36362 | 0.832 | 0.76 | 0.380719 | HC_vs_MS.Trt_B |
| EID2B     | 2.40E-05 | 0.51254 | 0.523 | 0.41 | 0.382679 | HC_vs_MS.Trt_B |
| UFD1L     | 2.42E-05 | 0.25449 | 0.761 | 0.66 | 0.386939 | HC_vs_MS.Trt_B |
| ZNF843    | 2.44E-05 | 0.27618 | 0.693 | 0.59 | 0.388984 | HC_vs_MS.Trt_B |
| SCRN3     | 2.44E-05 | 0.35003 | 0.426 | 0.29 | 0.389486 | HC_vs_MS.Trt_B |
| CUL3      | 2.44E-05 | -0.3044 | 0.412 | 0.29 | 0.390001 | HC_vs_MS.Trt_B |
| AMPD3     | 2.44E-05 | 0.90253 | 0.43  | 0.32 | 0.390226 | HC_vs_MS.Trt_B |
| JOSD1     | 2.47E-05 | 0.30185 | 0.533 | 0.4  | 0.394016 | HC_vs_MS.Trt_B |
| FRMD4A    | 2.47E-05 | 0.40132 | 0.629 | 0.5  | 0.394381 | HC_vs_MS.Trt_B |
| C21orf33  | 2.48E-05 | 0.39137 | 0.377 | 0.26 | 0.395399 | HC_vs_MS.Trt_B |
| LHFPL5    | 2.48E-05 | 0.26651 | 0.528 | 0.4  | 0.395717 | HC_vs_MS.Trt_B |
| OTUD3     | 2.49E-05 | 0.47513 | 0.5   | 0.38 | 0.398135 | HC_vs_MS.Trt_B |
| C11orf31  | 2.51E-05 | 0.42367 | 0.507 | 0.4  | 0.400713 | HC_vs_MS.Trt_B |
| OSBPL9    | 2.51E-05 | 0.28126 | 0.328 | 0.21 | 0.401516 | HC_vs_MS.Trt_B |
| ZFP64     | 2.52E-05 | 0.39633 | 0.58  | 0.46 | 0.402085 | HC_vs_MS.Trt_B |
| SREK1     | 2.52E-05 | -0.2561 | 0.523 | 0.39 | 0.402193 | HC_vs_MS.Trt_B |
| NFKBIZ    | 2.52E-05 | 0.67593 | 0.336 | 0.23 | 0.40317  | HC_vs_MS.Trt_B |
| SRSF7     | 2.52E-05 | 0.324   | 0.384 | 0.28 | 0.403317 | HC_vs_MS.Trt_B |
| MINK1     | 2.54E-05 | 0.47711 | 0.252 | 0.15 | 0.405175 | HC_vs_MS.Trt_B |
| TNR       | 2.58E-05 | 0.3527  | 0.29  | 0.19 | 0.412231 | HC_vs_MS.Trt_B |
| DDX11     | 2.59E-05 | 0.48218 | 0.414 | 0.3  | 0.41311  | HC_vs_MS.Trt_B |
| FAM83H-AS | 2.60E-05 | 0.2561  | 0.694 | 0.61 | 0.415985 | HC_vs_MS.Trt_B |
| SP140L    | 2.62E-05 | 0.2611  | 0.757 | 0.62 | 0.418123 | HC_vs_MS.Trt_B |
| TRAM2     | 2.62E-05 | -0.338  | 0.248 | 0.14 | 0.419186 | HC_vs_MS.Trt_B |
| WWC3      | 2.65E-05 | -0.869  | 0.345 | 0.23 | 0.422539 | HC_vs_MS.Trt_B |
| PAN2      | 2.67E-05 | 0.90184 | 0.322 | 0.21 | 0.426375 | HC_vs_MS.Trt_B |



|         |          |         |       |      |          |                |
|---------|----------|---------|-------|------|----------|----------------|
| FOXP3   | 2.67E-05 | 0.64458 | 0.457 | 0.35 | 0.426737 | HC_vs_MS.Trt_B |
| NARS2   | 2.70E-05 | 0.69998 | 0.39  | 0.28 | 0.431023 | HC_vs_MS.Trt_B |
| PIGS    | 2.70E-05 | 0.40648 | 0.48  | 0.37 | 0.43116  | HC_vs_MS.Trt_B |
| NUBPL   | 2.71E-05 | 0.30021 | 0.752 | 0.6  | 0.433453 | HC_vs_MS.Trt_B |
| ARHGAP5 | 2.73E-05 | 0.34885 | 0.497 | 0.36 | 0.436374 | HC_vs_MS.Trt_B |
| COPS7B  | 2.74E-05 | 0.31156 | 0.783 | 0.69 | 0.437132 | HC_vs_MS.Trt_B |
| TUBGCP2 | 2.75E-05 | -0.3654 | 0.761 | 0.62 | 0.438744 | HC_vs_MS.Trt_B |
| PDE3A   | 2.77E-05 | 0.27004 | 0.22  | 0.12 | 0.442091 | HC_vs_MS.Trt_B |
| FILIP1  | 2.78E-05 | 0.35528 | 0.384 | 0.26 | 0.444563 | HC_vs_MS.Trt_B |
| STRN    | 2.79E-05 | 0.32823 | 0.225 | 0.13 | 0.446015 | HC_vs_MS.Trt_B |
| CDK10   | 2.82E-05 | 0.5481  | 0.91  | 0.8  | 0.45116  | HC_vs_MS.Trt_B |
| FBXO45  | 2.83E-05 | -0.3579 | 0.423 | 0.3  | 0.451905 | HC_vs_MS.Trt_B |
| ZNF395  | 2.83E-05 | 0.26289 | 0.542 | 0.43 | 0.452744 | HC_vs_MS.Trt_B |
| SPEF2   | 2.85E-05 | 0.50995 | 0.546 | 0.42 | 0.454895 | HC_vs_MS.Trt_B |
| ARNTL2  | 2.85E-05 | 0.27705 | 0.614 | 0.53 | 0.455906 | HC_vs_MS.Trt_B |
| CPQ     | 2.90E-05 | -0.3818 | 0.357 | 0.24 | 0.463803 | HC_vs_MS.Trt_B |
| SNX5    | 2.94E-05 | 0.43755 | 0.583 | 0.48 | 0.470024 | HC_vs_MS.Trt_B |
| ZNF362  | 2.95E-05 | 1.48954 | 0.117 | 0.05 | 0.471311 | HC_vs_MS.Trt_B |
| RASAL3  | 2.98E-05 | 0.97967 | 0.184 | 0.1  | 0.47543  | HC_vs_MS.Trt_B |
| RAD50   | 2.98E-05 | 0.27379 | 0.184 | 0.09 | 0.475459 | HC_vs_MS.Trt_B |
| AFDN    | 3.00E-05 | 0.88495 | 0.113 | 0.04 | 0.479    | HC_vs_MS.Trt_B |
| ACSF3   | 3.00E-05 | 0.34825 | 0.799 | 0.68 | 0.479315 | HC_vs_MS.Trt_B |
| ZNF74   | 3.02E-05 | 0.33588 | 0.433 | 0.32 | 0.48215  | HC_vs_MS.Trt_B |
| SEMA5A  | 3.03E-05 | 0.26609 | 0.39  | 0.28 | 0.483526 | HC_vs_MS.Trt_B |
| STRN4   | 3.05E-05 | 0.3143  | 0.483 | 0.37 | 0.486694 | HC_vs_MS.Trt_B |
| NCR1    | 3.08E-05 | 0.57966 | 0.223 | 0.12 | 0.492765 | HC_vs_MS.Trt_B |
| EFCAB13 | 3.11E-05 | 0.5059  | 0.32  | 0.21 | 0.496336 | HC_vs_MS.Trt_B |
| DHX8    | 3.12E-05 | 0.33249 | 0.652 | 0.52 | 0.497825 | HC_vs_MS.Trt_B |
| EIF4A1  | 3.16E-05 | 0.32813 | 0.491 | 0.38 | 0.504152 | HC_vs_MS.Trt_B |
| QRICH1  | 3.17E-05 | 0.26008 | 0.539 | 0.41 | 0.505768 | HC_vs_MS.Trt_B |
| MCL1    | 3.18E-05 | 0.36561 | 0.372 | 0.26 | 0.508633 | HC_vs_MS.Trt_B |
| GPN3    | 3.23E-05 | 1.20868 | 0.374 | 0.27 | 0.515415 | HC_vs_MS.Trt_B |
| PYROXD1 | 3.26E-05 | 0.83871 | 0.462 | 0.35 | 0.520735 | HC_vs_MS.Trt_B |
| 2-Mar   | 3.27E-05 | 0.4884  | 0.516 | 0.4  | 0.522747 | HC_vs_MS.Trt_B |
| DPYD    | 3.28E-05 | 0.63022 | 0.471 | 0.36 | 0.523757 | HC_vs_MS.Trt_B |
| QTRT2   | 3.28E-05 | 0.42272 | 0.787 | 0.66 | 0.524456 | HC_vs_MS.Trt_B |
| GRB2    | 3.31E-05 | 0.41014 | 0.645 | 0.53 | 0.528706 | HC_vs_MS.Trt_B |
| LILRA6  | 3.31E-05 | 0.27215 | 0.523 | 0.41 | 0.52945  | HC_vs_MS.Trt_B |
| ITGB8   | 3.35E-05 | -0.4504 | 0.758 | 0.64 | 0.535843 | HC_vs_MS.Trt_B |
| YARS    | 3.38E-05 | 0.42089 | 0.803 | 0.75 | 0.539498 | HC_vs_MS.Trt_B |

|          |          |         |       |      |          |                |
|----------|----------|---------|-------|------|----------|----------------|
| AP4B1    | 3.42E-05 | -0.3095 | 0.622 | 0.51 | 0.545567 | HC_vs_MS.Trt_B |
| DCAF11   | 3.45E-05 | 0.90402 | 0.796 | 0.63 | 0.551327 | HC_vs_MS.Trt_B |
| MICU2    | 3.45E-05 | 0.8475  | 0.438 | 0.34 | 0.551596 | HC_vs_MS.Trt_B |
| RFT1     | 3.46E-05 | 0.42578 | 0.467 | 0.34 | 0.552464 | HC_vs_MS.Trt_B |
| FADS3    | 3.59E-05 | 0.2731  | 0.625 | 0.5  | 0.573261 | HC_vs_MS.Trt_B |
| MLH1     | 3.61E-05 | 1.32124 | 0.364 | 0.25 | 0.575873 | HC_vs_MS.Trt_B |
| CDHR3    | 3.65E-05 | 0.38295 | 0.617 | 0.51 | 0.582955 | HC_vs_MS.Trt_B |
| TSPAN32  | 3.67E-05 | 0.51976 | 0.274 | 0.17 | 0.586461 | HC_vs_MS.Trt_B |
| MCAM     | 3.68E-05 | 0.27086 | 0.451 | 0.34 | 0.588358 | HC_vs_MS.Trt_B |
| ZNF831   | 3.69E-05 | 0.39212 | 0.236 | 0.14 | 0.589307 | HC_vs_MS.Trt_B |
| KRIT1    | 3.69E-05 | 0.3191  | 0.61  | 0.5  | 0.589441 | HC_vs_MS.Trt_B |
| DMPK     | 3.73E-05 | -0.3272 | 0.588 | 0.46 | 0.595349 | HC_vs_MS.Trt_B |
| ZNF500   | 3.78E-05 | -0.4364 | 0.613 | 0.47 | 0.603036 | HC_vs_MS.Trt_B |
| FAM20B   | 3.78E-05 | 0.39125 | 0.565 | 0.42 | 0.60384  | HC_vs_MS.Trt_B |
| MIER2    | 3.80E-05 | 0.50917 | 0.529 | 0.39 | 0.606472 | HC_vs_MS.Trt_B |
| ANKHD1   | 3.80E-05 | 0.33262 | 0.43  | 0.32 | 0.606809 | HC_vs_MS.Trt_B |
| ANKFY1   | 3.85E-05 | 0.47987 | 0.617 | 0.5  | 0.615079 | HC_vs_MS.Trt_B |
| ATPAF1   | 3.89E-05 | 1.03266 | 0.235 | 0.14 | 0.620748 | HC_vs_MS.Trt_B |
| FAM219B  | 3.91E-05 | 0.39462 | 0.477 | 0.35 | 0.624264 | HC_vs_MS.Trt_B |
| ECHDC1   | 3.93E-05 | -0.6438 | 0.797 | 0.69 | 0.62811  | HC_vs_MS.Trt_B |
| MYEF2    | 3.95E-05 | 0.38462 | 0.451 | 0.33 | 0.630534 | HC_vs_MS.Trt_B |
| CEP76    | 3.97E-05 | 0.58353 | 0.787 | 0.7  | 0.63369  | HC_vs_MS.Trt_B |
| LIMK2    | 3.97E-05 | 0.67489 | 0.201 | 0.11 | 0.633985 | HC_vs_MS.Trt_B |
| IPP      | 3.99E-05 | 0.2503  | 0.43  | 0.3  | 0.636972 | HC_vs_MS.Trt_B |
| PAM      | 4.00E-05 | 0.87183 | 0.325 | 0.22 | 0.638815 | HC_vs_MS.Trt_B |
| BMF      | 4.02E-05 | 0.35059 | 0.139 | 0.06 | 0.641532 | HC_vs_MS.Trt_B |
| TRIM6    | 4.06E-05 | 0.28243 | 0.522 | 0.39 | 0.648379 | HC_vs_MS.Trt_B |
| ADGRA3   | 4.08E-05 | 0.35974 | 0.393 | 0.29 | 0.651206 | HC_vs_MS.Trt_B |
| LIMD1    | 4.09E-05 | 0.35554 | 0.813 | 0.7  | 0.653198 | HC_vs_MS.Trt_B |
| HERPUD2  | 4.10E-05 | 0.37419 | 0.481 | 0.38 | 0.654177 | HC_vs_MS.Trt_B |
| ZNF486   | 4.13E-05 | 0.54977 | 0.649 | 0.56 | 0.659564 | HC_vs_MS.Trt_B |
| MTA3     | 4.16E-05 | -0.3501 | 0.641 | 0.52 | 0.664319 | HC_vs_MS.Trt_B |
| MED20    | 4.17E-05 | -0.5323 | 0.314 | 0.2  | 0.665459 | HC_vs_MS.Trt_B |
| CYBA     | 4.18E-05 | 0.5205  | 0.255 | 0.16 | 0.667179 | HC_vs_MS.Trt_B |
| METTTL16 | 4.20E-05 | 0.29672 | 0.759 | 0.66 | 0.671314 | HC_vs_MS.Trt_B |
| FOCAD    | 4.24E-05 | 0.47534 | 0.529 | 0.4  | 0.677496 | HC_vs_MS.Trt_B |
| NDUFS4   | 4.25E-05 | 0.63184 | 0.267 | 0.17 | 0.678781 | HC_vs_MS.Trt_B |
| TBCK     | 4.28E-05 | 0.30402 | 0.725 | 0.59 | 0.683371 | HC_vs_MS.Trt_B |
| DDX18    | 4.29E-05 | -0.2536 | 0.745 | 0.61 | 0.684997 | HC_vs_MS.Trt_B |
| PACS1    | 4.31E-05 | 0.34851 | 0.817 | 0.74 | 0.687648 | HC_vs_MS.Trt_B |

|          |          |         |       |      |          |                |
|----------|----------|---------|-------|------|----------|----------------|
| TAP1     | 4.31E-05 | 0.43229 | 0.617 | 0.51 | 0.688271 | HC_vs_MS.Trt_B |
| ITGB7    | 4.31E-05 | 0.52397 | 0.37  | 0.26 | 0.68875  | HC_vs_MS.Trt_B |
| GRAP     | 4.32E-05 | 0.83025 | 0.204 | 0.12 | 0.690608 | HC_vs_MS.Trt_B |
| GTF2IRD1 | 4.33E-05 | 0.28155 | 0.645 | 0.53 | 0.691665 | HC_vs_MS.Trt_B |
| PGA3     | 4.35E-05 | 0.50892 | 0.291 | 0.19 | 0.695181 | HC_vs_MS.Trt_B |
| ACTN1    | 4.38E-05 | 0.321   | 0.599 | 0.48 | 0.699805 | HC_vs_MS.Trt_B |
| MAFF     | 4.39E-05 | 0.37988 | 0.642 | 0.52 | 0.700902 | HC_vs_MS.Trt_B |
| EPT1     | 4.39E-05 | 0.28725 | 0.336 | 0.22 | 0.701602 | HC_vs_MS.Trt_B |
| ADCK1    | 4.40E-05 | 0.72471 | 0.274 | 0.18 | 0.703051 | HC_vs_MS.Trt_B |
| ZNF224   | 4.40E-05 | 0.75982 | 0.458 | 0.36 | 0.703504 | HC_vs_MS.Trt_B |
| CEACAM8  | 4.41E-05 | 0.30048 | 0.504 | 0.41 | 0.704683 | HC_vs_MS.Trt_B |
| B4GALT4  | 4.42E-05 | 0.56304 | 0.604 | 0.48 | 0.705826 | HC_vs_MS.Trt_B |
| CHI3L1   | 4.51E-05 | 0.34204 | 0.314 | 0.21 | 0.721045 | HC_vs_MS.Trt_B |
| FAM161A  | 4.52E-05 | 0.26442 | 0.614 | 0.51 | 0.72273  | HC_vs_MS.Trt_B |
| CPSF4    | 4.56E-05 | 0.62855 | 0.357 | 0.24 | 0.728952 | HC_vs_MS.Trt_B |
| TMEM45B  | 4.57E-05 | 0.32089 | 0.603 | 0.48 | 0.730123 | HC_vs_MS.Trt_B |
| PRPF40A  | 4.59E-05 | -0.3068 | 0.465 | 0.32 | 0.733548 | HC_vs_MS.Trt_B |
| LRTOMT   | 4.62E-05 | 0.25473 | 0.803 | 0.73 | 0.737654 | HC_vs_MS.Trt_B |
| HYPK     | 4.65E-05 | 0.32054 | 0.903 | 0.8  | 0.742842 | HC_vs_MS.Trt_B |
| TRAF1    | 4.68E-05 | 0.46329 | 0.322 | 0.21 | 0.747334 | HC_vs_MS.Trt_B |
| RRAGC    | 4.69E-05 | 0.69115 | 0.509 | 0.39 | 0.748769 | HC_vs_MS.Trt_B |
| PAGR1    | 4.69E-05 | 0.45714 | 0.183 | 0.1  | 0.749139 | HC_vs_MS.Trt_B |
| POM121   | 4.69E-05 | 0.36724 | 0.397 | 0.27 | 0.74921  | HC_vs_MS.Trt_B |
| THSD4    | 4.71E-05 | 0.41617 | 0.362 | 0.25 | 0.75227  | HC_vs_MS.Trt_B |
| NFATC2   | 4.75E-05 | 0.44249 | 0.178 | 0.09 | 0.758679 | HC_vs_MS.Trt_B |
| HOXB2    | 4.76E-05 | 0.87557 | 0.123 | 0.05 | 0.760874 | HC_vs_MS.Trt_B |
| PDCD6    | 4.77E-05 | -0.2842 | 0.667 | 0.53 | 0.761983 | HC_vs_MS.Trt_B |
| NUDCD2   | 4.77E-05 | -0.2522 | 0.767 | 0.65 | 0.762386 | HC_vs_MS.Trt_B |
| SLC50A1  | 4.83E-05 | 0.2616  | 0.745 | 0.66 | 0.771683 | HC_vs_MS.Trt_B |
| IKZF2    | 4.89E-05 | 0.28646 | 0.357 | 0.25 | 0.780567 | HC_vs_MS.Trt_B |
| BCAP29   | 4.90E-05 | 0.70964 | 0.374 | 0.25 | 0.782139 | HC_vs_MS.Trt_B |
| OTUB1    | 4.97E-05 | -0.3275 | 0.929 | 0.8  | 0.794286 | HC_vs_MS.Trt_B |
| NATD1    | 4.98E-05 | 0.63754 | 0.481 | 0.37 | 0.794913 | HC_vs_MS.Trt_B |
| MCUR1    | 5.03E-05 | 0.48193 | 0.786 | 0.69 | 0.804226 | HC_vs_MS.Trt_B |
| NUP43    | 5.04E-05 | -0.2997 | 0.843 | 0.72 | 0.80475  | HC_vs_MS.Trt_B |
| HPS1     | 5.07E-05 | 0.30405 | 0.6   | 0.45 | 0.809553 | HC_vs_MS.Trt_B |
| VENTX    | 5.08E-05 | 0.26697 | 0.403 | 0.29 | 0.81122  | HC_vs_MS.Trt_B |
| GALNS    | 5.15E-05 | 0.60222 | 0.542 | 0.42 | 0.822945 | HC_vs_MS.Trt_B |
| DDX25    | 5.16E-05 | 0.33732 | 0.654 | 0.54 | 0.823773 | HC_vs_MS.Trt_B |
| EVC      | 5.21E-05 | 1.01548 | 0.242 | 0.15 | 0.83224  | HC_vs_MS.Trt_B |

|          |          |         |       |      |          |                |
|----------|----------|---------|-------|------|----------|----------------|
| PPARD    | 5.23E-05 | 0.38068 | 0.529 | 0.41 | 0.834998 | HC_vs_MS.Trt_B |
| OPN3     | 5.25E-05 | 0.71067 | 0.294 | 0.19 | 0.838745 | HC_vs_MS.Trt_B |
| NSUN2    | 5.27E-05 | 0.47088 | 0.659 | 0.53 | 0.842331 | HC_vs_MS.Trt_B |
| ASGR1    | 5.28E-05 | 0.30399 | 0.455 | 0.35 | 0.843771 | HC_vs_MS.Trt_B |
| NXF1     | 5.29E-05 | 0.46159 | 0.559 | 0.43 | 0.844341 | HC_vs_MS.Trt_B |
| ZNF845   | 5.29E-05 | 0.41658 | 0.645 | 0.51 | 0.845146 | HC_vs_MS.Trt_B |
| HUNK     | 5.36E-05 | 0.26184 | 0.419 | 0.31 | 0.856702 | HC_vs_MS.Trt_B |
| KLHL33   | 5.37E-05 | 0.25402 | 0.497 | 0.39 | 0.857134 | HC_vs_MS.Trt_B |
| PALM     | 5.40E-05 | 0.26196 | 0.535 | 0.44 | 0.861987 | HC_vs_MS.Trt_B |
| STAM2    | 5.40E-05 | 0.52949 | 0.532 | 0.42 | 0.863075 | HC_vs_MS.Trt_B |
| FOXJ2    | 5.42E-05 | 0.53505 | 0.449 | 0.33 | 0.865046 | HC_vs_MS.Trt_B |
| COL1A1   | 5.43E-05 | 0.40026 | 0.497 | 0.39 | 0.868053 | HC_vs_MS.Trt_B |
| DCDC1    | 5.45E-05 | 0.38492 | 0.48  | 0.37 | 0.869902 | HC_vs_MS.Trt_B |
| UROS     | 5.46E-05 | 0.6877  | 0.457 | 0.34 | 0.872107 | HC_vs_MS.Trt_B |
| HSD17B12 | 5.53E-05 | 0.34017 | 0.475 | 0.35 | 0.883746 | HC_vs_MS.Trt_B |
| GPA33    | 5.55E-05 | 0.73928 | 0.146 | 0.07 | 0.885773 | HC_vs_MS.Trt_B |
| GTF2E2   | 5.61E-05 | 0.61023 | 0.588 | 0.46 | 0.895506 | HC_vs_MS.Trt_B |
| PHGDH    | 5.68E-05 | 0.28755 | 0.241 | 0.14 | 0.907843 | HC_vs_MS.Trt_B |
| PTPRS    | 5.80E-05 | 0.32676 | 0.509 | 0.39 | 0.926203 | HC_vs_MS.Trt_B |
| SLC35G1  | 5.80E-05 | 0.61331 | 0.146 | 0.07 | 0.926975 | HC_vs_MS.Trt_B |
| TNFSF14  | 5.83E-05 | 0.57039 | 0.606 | 0.49 | 0.930761 | HC_vs_MS.Trt_B |
| ZNF430   | 5.84E-05 | -0.4071 | 0.923 | 0.83 | 0.933332 | HC_vs_MS.Trt_B |
| DNAJC7   | 5.86E-05 | 0.27423 | 0.977 | 0.95 | 0.935676 | HC_vs_MS.Trt_B |
| NT5C3B   | 5.87E-05 | 0.46834 | 0.616 | 0.51 | 0.938155 | HC_vs_MS.Trt_B |
| CLU      | 5.91E-05 | 0.4264  | 0.464 | 0.36 | 0.944626 | HC_vs_MS.Trt_B |
| TRIP13   | 5.92E-05 | 0.36244 | 0.543 | 0.44 | 0.945732 | HC_vs_MS.Trt_B |
| RBM33    | 5.97E-05 | 0.31938 | 0.29  | 0.19 | 0.954335 | HC_vs_MS.Trt_B |
| GNL2     | 5.99E-05 | 0.64818 | 0.63  | 0.53 | 0.956996 | HC_vs_MS.Trt_B |
| DDX19B   | 6.02E-05 | -0.7254 | 0.432 | 0.31 | 0.961962 | HC_vs_MS.Trt_B |
| NDUFA9   | 6.03E-05 | -0.5052 | 0.868 | 0.73 | 0.962446 | HC_vs_MS.Trt_B |
| LSM8     | 6.04E-05 | -0.4742 | 0.861 | 0.75 | 0.965084 | HC_vs_MS.Trt_B |
| CCDC141  | 6.06E-05 | 0.26725 | 0.622 | 0.51 | 0.968007 | HC_vs_MS.Trt_B |
| PLK3     | 6.09E-05 | 0.45568 | 0.683 | 0.58 | 0.972745 | HC_vs_MS.Trt_B |
| C10orf76 | 6.12E-05 | 0.45839 | 0.333 | 0.22 | 0.978141 | HC_vs_MS.Trt_B |
| TAB2     | 6.23E-05 | -0.5006 | 0.584 | 0.44 | 0.994819 | HC_vs_MS.Trt_B |
| KIF23    | 6.26E-05 | 0.29657 | 0.523 | 0.39 | 1        | HC_vs_MS.Trt_B |
| PNPLA4   | 6.28E-05 | -0.8686 | 0.284 | 0.18 | 1        | HC_vs_MS.Trt_B |
| GTF3C2   | 6.34E-05 | 0.46115 | 0.532 | 0.41 | 1        | HC_vs_MS.Trt_B |
| FUK      | 6.38E-05 | 0.32611 | 0.542 | 0.43 | 1        | HC_vs_MS.Trt_B |
| CCNY     | 6.39E-05 | 0.31254 | 0.441 | 0.33 | 1        | HC_vs_MS.Trt_B |

|          |          |         |       |      |   |                |
|----------|----------|---------|-------|------|---|----------------|
| HYLS1    | 6.39E-05 | 1.15696 | 0.39  | 0.28 | 1 | HC_vs_MS.Trt_B |
| FSD1     | 6.39E-05 | 0.25687 | 0.39  | 0.28 | 1 | HC_vs_MS.Trt_B |
| TUBGCP4  | 6.41E-05 | 0.62126 | 0.784 | 0.7  | 1 | HC_vs_MS.Trt_B |
| CREB1    | 6.44E-05 | 0.45945 | 0.643 | 0.55 | 1 | HC_vs_MS.Trt_B |
| LRFN1    | 6.44E-05 | 0.93387 | 0.142 | 0.07 | 1 | HC_vs_MS.Trt_B |
| SEMA4C   | 6.48E-05 | -0.5898 | 0.762 | 0.64 | 1 | HC_vs_MS.Trt_B |
| CDKL1    | 6.51E-05 | -0.4399 | 0.704 | 0.59 | 1 | HC_vs_MS.Trt_B |
| FAM53C   | 6.51E-05 | 0.42187 | 0.786 | 0.68 | 1 | HC_vs_MS.Trt_B |
| CYP4F11  | 6.58E-05 | 0.39161 | 0.367 | 0.28 | 1 | HC_vs_MS.Trt_B |
| MAP4K2   | 6.63E-05 | 0.57145 | 0.642 | 0.56 | 1 | HC_vs_MS.Trt_B |
| BEND6    | 6.67E-05 | 0.38501 | 0.197 | 0.11 | 1 | HC_vs_MS.Trt_B |
| PUM2     | 6.80E-05 | 0.76205 | 0.33  | 0.23 | 1 | HC_vs_MS.Trt_B |
| TATDN1   | 6.85E-05 | 0.32775 | 0.664 | 0.59 | 1 | HC_vs_MS.Trt_B |
| CDON     | 6.87E-05 | 0.37382 | 0.458 | 0.35 | 1 | HC_vs_MS.Trt_B |
| UTRN     | 6.88E-05 | 0.28867 | 0.546 | 0.44 | 1 | HC_vs_MS.Trt_B |
| GAN      | 6.90E-05 | -0.3191 | 0.812 | 0.74 | 1 | HC_vs_MS.Trt_B |
| NEURL1   | 6.90E-05 | 0.25573 | 0.3   | 0.2  | 1 | HC_vs_MS.Trt_B |
| TBC1D24  | 6.94E-05 | -0.285  | 0.706 | 0.6  | 1 | HC_vs_MS.Trt_B |
| ATP8B2   | 6.95E-05 | 0.51765 | 0.807 | 0.71 | 1 | HC_vs_MS.Trt_B |
| KIAA1549 | 6.96E-05 | 0.25376 | 0.381 | 0.27 | 1 | HC_vs_MS.Trt_B |
| FAM78A   | 6.96E-05 | 0.45176 | 0.365 | 0.26 | 1 | HC_vs_MS.Trt_B |
| TRIM5    | 6.97E-05 | 0.64156 | 0.468 | 0.36 | 1 | HC_vs_MS.Trt_B |
| LCLAT1   | 6.98E-05 | 0.25539 | 0.812 | 0.68 | 1 | HC_vs_MS.Trt_B |
| DRC3     | 7.00E-05 | 0.4416  | 0.591 | 0.49 | 1 | HC_vs_MS.Trt_B |
| ZMAT1    | 7.01E-05 | 0.91284 | 0.341 | 0.24 | 1 | HC_vs_MS.Trt_B |
| RBBP9    | 7.04E-05 | 0.96854 | 0.33  | 0.23 | 1 | HC_vs_MS.Trt_B |
| DMAP1    | 7.05E-05 | -0.3006 | 0.441 | 0.31 | 1 | HC_vs_MS.Trt_B |
| CCDC14   | 7.09E-05 | -0.3281 | 0.228 | 0.13 | 1 | HC_vs_MS.Trt_B |
| SCN1A    | 7.22E-05 | 0.32565 | 0.372 | 0.26 | 1 | HC_vs_MS.Trt_B |
| SLC24A1  | 7.37E-05 | -0.3768 | 0.468 | 0.34 | 1 | HC_vs_MS.Trt_B |
| CCDC124  | 7.37E-05 | 0.26991 | 0.486 | 0.37 | 1 | HC_vs_MS.Trt_B |
| SPTLC1   | 7.41E-05 | -0.6268 | 0.723 | 0.6  | 1 | HC_vs_MS.Trt_B |
| PLEKHD1  | 7.42E-05 | 0.32499 | 0.706 | 0.61 | 1 | HC_vs_MS.Trt_B |
| MUC20    | 7.46E-05 | 0.61761 | 0.536 | 0.41 | 1 | HC_vs_MS.Trt_B |
| LCN12    | 7.50E-05 | 0.34728 | 0.274 | 0.18 | 1 | HC_vs_MS.Trt_B |
| MAP3K10  | 7.55E-05 | 0.54424 | 0.354 | 0.24 | 1 | HC_vs_MS.Trt_B |
| RC3H1    | 7.73E-05 | 0.26233 | 0.438 | 0.35 | 1 | HC_vs_MS.Trt_B |
| NAGK     | 7.74E-05 | 0.55065 | 0.733 | 0.65 | 1 | HC_vs_MS.Trt_B |
| CD40LG   | 7.75E-05 | 0.51766 | 0.22  | 0.13 | 1 | HC_vs_MS.Trt_B |
| APOL1    | 7.82E-05 | 0.63391 | 0.7   | 0.59 | 1 | HC_vs_MS.Trt_B |

|          |          |         |       |      |   |                |
|----------|----------|---------|-------|------|---|----------------|
| ALS2     | 7.86E-05 | 0.34593 | 0.435 | 0.31 | 1 | HC_vs_MS.Trt_B |
| GPLD1    | 7.87E-05 | 0.93827 | 0.684 | 0.63 | 1 | HC_vs_MS.Trt_B |
| HOPX     | 7.92E-05 | -0.2707 | 0.817 | 0.69 | 1 | HC_vs_MS.Trt_B |
| RAD9B    | 7.92E-05 | -0.4373 | 0.391 | 0.29 | 1 | HC_vs_MS.Trt_B |
| AFAP1    | 7.97E-05 | -0.3149 | 0.391 | 0.28 | 1 | HC_vs_MS.Trt_B |
| STRA6    | 7.98E-05 | 0.29022 | 0.548 | 0.45 | 1 | HC_vs_MS.Trt_B |
| PKHD1L1  | 8.02E-05 | 0.36859 | 0.446 | 0.33 | 1 | HC_vs_MS.Trt_B |
| PHLPP1   | 8.05E-05 | 0.36154 | 0.719 | 0.6  | 1 | HC_vs_MS.Trt_B |
| ICE2     | 8.06E-05 | -0.3605 | 0.829 | 0.77 | 1 | HC_vs_MS.Trt_B |
| MPP7     | 8.09E-05 | 0.76991 | 0.255 | 0.16 | 1 | HC_vs_MS.Trt_B |
| CCNF     | 8.09E-05 | 0.47726 | 0.439 | 0.34 | 1 | HC_vs_MS.Trt_B |
| TGFB111  | 8.16E-05 | 0.80854 | 0.258 | 0.17 | 1 | HC_vs_MS.Trt_B |
| BCKDHB   | 8.31E-05 | -0.5422 | 0.584 | 0.48 | 1 | HC_vs_MS.Trt_B |
| GAB3     | 8.35E-05 | -0.449  | 0.346 | 0.23 | 1 | HC_vs_MS.Trt_B |
| CCDC9    | 8.40E-05 | 0.36477 | 0.265 | 0.17 | 1 | HC_vs_MS.Trt_B |
| ZDHC13   | 8.46E-05 | -0.6456 | 0.739 | 0.6  | 1 | HC_vs_MS.Trt_B |
| ADSL     | 8.49E-05 | 0.31422 | 0.872 | 0.77 | 1 | HC_vs_MS.Trt_B |
| ADAMTSL5 | 8.52E-05 | 0.28903 | 0.291 | 0.19 | 1 | HC_vs_MS.Trt_B |
| HAPLN3   | 8.57E-05 | 0.40678 | 0.196 | 0.11 | 1 | HC_vs_MS.Trt_B |
| C2orf88  | 8.59E-05 | 0.64549 | 0.345 | 0.24 | 1 | HC_vs_MS.Trt_B |
| NCALD    | 8.60E-05 | 0.3436  | 0.699 | 0.61 | 1 | HC_vs_MS.Trt_B |
| RBM14    | 8.65E-05 | 0.55128 | 0.223 | 0.14 | 1 | HC_vs_MS.Trt_B |
| APOOL    | 8.65E-05 | -0.3518 | 0.771 | 0.65 | 1 | HC_vs_MS.Trt_B |
| LDB1     | 8.67E-05 | 0.46755 | 0.142 | 0.07 | 1 | HC_vs_MS.Trt_B |
| HSP90AB1 | 8.83E-05 | 0.25847 | 0.532 | 0.41 | 1 | HC_vs_MS.Trt_B |
| KRBA2    | 8.90E-05 | 0.33162 | 0.37  | 0.26 | 1 | HC_vs_MS.Trt_B |
| PCBP3    | 8.95E-05 | 0.56219 | 0.459 | 0.34 | 1 | HC_vs_MS.Trt_B |
| IFT88    | 8.98E-05 | -0.9138 | 0.549 | 0.43 | 1 | HC_vs_MS.Trt_B |
| FUT10    | 9.07E-05 | -0.4448 | 0.358 | 0.28 | 1 | HC_vs_MS.Trt_B |
| CRTC2    | 9.12E-05 | 0.41238 | 0.387 | 0.27 | 1 | HC_vs_MS.Trt_B |
| KLK2     | 9.19E-05 | 0.35399 | 0.341 | 0.24 | 1 | HC_vs_MS.Trt_B |
| ATP1A3   | 9.22E-05 | 0.88479 | 0.361 | 0.26 | 1 | HC_vs_MS.Trt_B |
| WAC      | 9.22E-05 | 0.38193 | 0.445 | 0.33 | 1 | HC_vs_MS.Trt_B |
| JUND     | 9.29E-05 | 0.30834 | 0.162 | 0.09 | 1 | HC_vs_MS.Trt_B |
| DYNLL1   | 9.31E-05 | 0.504   | 0.31  | 0.22 | 1 | HC_vs_MS.Trt_B |
| CDK19    | 9.37E-05 | 0.68754 | 0.313 | 0.21 | 1 | HC_vs_MS.Trt_B |
| PPP3CC   | 9.48E-05 | 0.58763 | 0.207 | 0.12 | 1 | HC_vs_MS.Trt_B |
| SHMT2    | 9.50E-05 | 0.30825 | 0.304 | 0.2  | 1 | HC_vs_MS.Trt_B |
| GRK4     | 9.58E-05 | 0.71586 | 0.565 | 0.49 | 1 | HC_vs_MS.Trt_B |
| ZNF726   | 9.61E-05 | -0.2899 | 0.858 | 0.74 | 1 | HC_vs_MS.Trt_B |

|            |          |         |       |      |   |                |
|------------|----------|---------|-------|------|---|----------------|
| AGPAT5     | 9.61E-05 | 0.70019 | 0.141 | 0.07 | 1 | HC_vs_MS.Trt_B |
| RIF1       | 9.63E-05 | 0.4101  | 0.591 | 0.45 | 1 | HC_vs_MS.Trt_B |
| INHBE      | 9.83E-05 | 0.30709 | 0.364 | 0.26 | 1 | HC_vs_MS.Trt_B |
| OCEL1      | 9.87E-05 | 0.62872 | 0.517 | 0.41 | 1 | HC_vs_MS.Trt_B |
| DBP        | 9.88E-05 | 0.31604 | 0.661 | 0.54 | 1 | HC_vs_MS.Trt_B |
| SIAE       | 9.89E-05 | 0.4557  | 0.599 | 0.49 | 1 | HC_vs_MS.Trt_B |
| SMC5       | 9.93E-05 | 0.35825 | 0.386 | 0.28 | 1 | HC_vs_MS.Trt_B |
| EXOSC2     | 9.93E-05 | -0.4844 | 0.751 | 0.63 | 1 | HC_vs_MS.Trt_B |
| TIAL1      | 1.00E-04 | -0.388  | 0.862 | 0.74 | 1 | HC_vs_MS.Trt_B |
| ROCK2      | 1.01E-04 | 0.56098 | 0.439 | 0.34 | 1 | HC_vs_MS.Trt_B |
| SLC44A1    | 1.01E-04 | 0.93812 | 0.628 | 0.57 | 1 | HC_vs_MS.Trt_B |
| DIAPH2     | 1.01E-04 | 0.40346 | 0.304 | 0.2  | 1 | HC_vs_MS.Trt_B |
| ATP5H      | 1.01E-04 | -0.6159 | 0.738 | 0.64 | 1 | HC_vs_MS.Trt_B |
| BAZ1A      | 1.01E-04 | -0.2695 | 0.374 | 0.26 | 1 | HC_vs_MS.Trt_B |
| PIGR       | 1.02E-04 | 0.26678 | 0.557 | 0.45 | 1 | HC_vs_MS.Trt_B |
| RPAP1      | 1.03E-04 | 0.38833 | 0.803 | 0.69 | 1 | HC_vs_MS.Trt_B |
| LNPK       | 1.03E-04 | -0.3782 | 0.519 | 0.41 | 1 | HC_vs_MS.Trt_B |
| JAM2       | 1.03E-04 | 0.2654  | 0.5   | 0.41 | 1 | HC_vs_MS.Trt_B |
| FBXO31     | 1.03E-04 | 0.91323 | 0.3   | 0.2  | 1 | HC_vs_MS.Trt_B |
| OR52I1     | 1.03E-04 | 0.48272 | 0.458 | 0.34 | 1 | HC_vs_MS.Trt_B |
| TRPV1      | 1.05E-04 | 1.05423 | 0.401 | 0.29 | 1 | HC_vs_MS.Trt_B |
| CEP95      | 1.05E-04 | -0.4368 | 0.426 | 0.29 | 1 | HC_vs_MS.Trt_B |
| PCDHGA1    | 1.05E-04 | -0.3645 | 0.317 | 0.21 | 1 | HC_vs_MS.Trt_B |
| HSPA1B     | 1.06E-04 | 0.55935 | 0.201 | 0.12 | 1 | HC_vs_MS.Trt_B |
| MT-ND5     | 1.06E-04 | -0.5359 | 0.849 | 0.85 | 1 | HC_vs_MS.Trt_B |
| EFNA5      | 1.06E-04 | 0.44391 | 0.378 | 0.28 | 1 | HC_vs_MS.Trt_B |
| ATF7IP2    | 1.06E-04 | 0.29423 | 0.535 | 0.42 | 1 | HC_vs_MS.Trt_B |
| ZNF879     | 1.07E-04 | 0.4017  | 0.312 | 0.21 | 1 | HC_vs_MS.Trt_B |
| N4BP2L1    | 1.07E-04 | -0.3642 | 0.561 | 0.44 | 1 | HC_vs_MS.Trt_B |
| LGALS9     | 1.07E-04 | 0.31266 | 0.299 | 0.2  | 1 | HC_vs_MS.Trt_B |
| DCAF13     | 1.08E-04 | -0.3607 | 0.625 | 0.5  | 1 | HC_vs_MS.Trt_B |
| APBB2      | 1.09E-04 | 0.34662 | 0.317 | 0.22 | 1 | HC_vs_MS.Trt_B |
| DHX37      | 1.09E-04 | 0.30382 | 0.455 | 0.35 | 1 | HC_vs_MS.Trt_B |
| DHRS1      | 1.10E-04 | 0.30055 | 0.628 | 0.51 | 1 | HC_vs_MS.Trt_B |
| PANK2      | 1.12E-04 | 1.43898 | 0.517 | 0.42 | 1 | HC_vs_MS.Trt_B |
| NUP85      | 1.12E-04 | 0.63628 | 0.475 | 0.36 | 1 | HC_vs_MS.Trt_B |
| AC025335.1 | 1.12E-04 | 0.25858 | 0.613 | 0.49 | 1 | HC_vs_MS.Trt_B |
| TMEM184C   | 1.12E-04 | 0.35422 | 0.533 | 0.41 | 1 | HC_vs_MS.Trt_B |
| CDCA3      | 1.14E-04 | 0.63184 | 0.57  | 0.46 | 1 | HC_vs_MS.Trt_B |
| ZNF619     | 1.15E-04 | 0.75967 | 0.716 | 0.61 | 1 | HC_vs_MS.Trt_B |

|           |          |         |       |      |   |                |
|-----------|----------|---------|-------|------|---|----------------|
| FUT6      | 1.15E-04 | 0.64527 | 0.404 | 0.29 | 1 | HC_vs_MS.Trt_B |
| CAPZA1    | 1.16E-04 | -0.668  | 0.757 | 0.81 | 1 | HC_vs_MS.Trt_B |
| PEX13     | 1.17E-04 | 0.45782 | 0.762 | 0.69 | 1 | HC_vs_MS.Trt_B |
| SNTG1     | 1.17E-04 | 0.2702  | 0.532 | 0.43 | 1 | HC_vs_MS.Trt_B |
| SIPA1L3   | 1.18E-04 | 0.28651 | 0.619 | 0.5  | 1 | HC_vs_MS.Trt_B |
| ALG13     | 1.19E-04 | 0.37069 | 0.284 | 0.19 | 1 | HC_vs_MS.Trt_B |
| TFR2      | 1.20E-04 | -0.3918 | 0.696 | 0.58 | 1 | HC_vs_MS.Trt_B |
| UBA3      | 1.21E-04 | 0.2737  | 0.446 | 0.33 | 1 | HC_vs_MS.Trt_B |
| PPAN      | 1.21E-04 | 0.60249 | 0.368 | 0.27 | 1 | HC_vs_MS.Trt_B |
| CTH       | 1.22E-04 | 0.41918 | 0.626 | 0.51 | 1 | HC_vs_MS.Trt_B |
| ENTPD7    | 1.23E-04 | 0.3774  | 0.345 | 0.24 | 1 | HC_vs_MS.Trt_B |
| NAA30     | 1.23E-04 | 0.33673 | 0.443 | 0.34 | 1 | HC_vs_MS.Trt_B |
| HUS1      | 1.23E-04 | -0.3123 | 0.475 | 0.37 | 1 | HC_vs_MS.Trt_B |
| ADRA1A    | 1.23E-04 | 0.25376 | 0.593 | 0.49 | 1 | HC_vs_MS.Trt_B |
| PLCD4     | 1.24E-04 | 0.67747 | 0.286 | 0.19 | 1 | HC_vs_MS.Trt_B |
| GAL3ST4   | 1.25E-04 | 1.43192 | 0.449 | 0.35 | 1 | HC_vs_MS.Trt_B |
| FAH       | 1.26E-04 | 0.34522 | 0.141 | 0.07 | 1 | HC_vs_MS.Trt_B |
| ITFG2     | 1.27E-04 | 0.25764 | 0.309 | 0.21 | 1 | HC_vs_MS.Trt_B |
| TRMT5     | 1.28E-04 | 1.09497 | 0.165 | 0.09 | 1 | HC_vs_MS.Trt_B |
| RENBP     | 1.28E-04 | 0.31466 | 0.82  | 0.71 | 1 | HC_vs_MS.Trt_B |
| ZMYND8    | 1.28E-04 | -0.3919 | 0.33  | 0.22 | 1 | HC_vs_MS.Trt_B |
| CRTAP     | 1.29E-04 | 0.41145 | 0.522 | 0.43 | 1 | HC_vs_MS.Trt_B |
| MMP24-AS1 | 1.29E-04 | 0.40168 | 0.725 | 0.61 | 1 | HC_vs_MS.Trt_B |
| MRPS21    | 1.29E-04 | -0.3254 | 0.554 | 0.42 | 1 | HC_vs_MS.Trt_B |
| ANKRD30B  | 1.31E-04 | 0.40086 | 0.496 | 0.39 | 1 | HC_vs_MS.Trt_B |
| MAP2K7    | 1.31E-04 | 0.29445 | 0.609 | 0.51 | 1 | HC_vs_MS.Trt_B |
| GJB4      | 1.32E-04 | 0.2848  | 0.651 | 0.55 | 1 | HC_vs_MS.Trt_B |
| PLS1      | 1.32E-04 | 0.49848 | 0.283 | 0.19 | 1 | HC_vs_MS.Trt_B |
| TMX3      | 1.32E-04 | -0.2567 | 0.417 | 0.3  | 1 | HC_vs_MS.Trt_B |
| SH3BP1    | 1.33E-04 | 0.73658 | 0.109 | 0.05 | 1 | HC_vs_MS.Trt_B |
| RAPGEF6   | 1.33E-04 | 0.43336 | 0.536 | 0.44 | 1 | HC_vs_MS.Trt_B |
| CHRNA7    | 1.34E-04 | 0.29021 | 0.794 | 0.7  | 1 | HC_vs_MS.Trt_B |
| LARP4     | 1.34E-04 | 0.615   | 0.358 | 0.25 | 1 | HC_vs_MS.Trt_B |
| CHDH      | 1.35E-04 | 0.34464 | 0.472 | 0.37 | 1 | HC_vs_MS.Trt_B |
| SF3A1     | 1.37E-04 | 0.53919 | 0.349 | 0.26 | 1 | HC_vs_MS.Trt_B |
| 1-Mar     | 1.37E-04 | 0.42601 | 0.583 | 0.47 | 1 | HC_vs_MS.Trt_B |
| MSANTD1   | 1.37E-04 | -0.7334 | 0.441 | 0.35 | 1 | HC_vs_MS.Trt_B |
| SHQ1      | 1.38E-04 | -0.3398 | 0.69  | 0.58 | 1 | HC_vs_MS.Trt_B |
| GOT2      | 1.39E-04 | 0.29701 | 0.836 | 0.76 | 1 | HC_vs_MS.Trt_B |
| DMXL1     | 1.39E-04 | 0.43672 | 0.171 | 0.09 | 1 | HC_vs_MS.Trt_B |



|            |          |         |       |      |   |                |
|------------|----------|---------|-------|------|---|----------------|
| PIP5KL1    | 1.40E-04 | 0.33664 | 0.454 | 0.35 | 1 | HC_vs_MS.Trt_B |
| GSTT1      | 1.40E-04 | -1.0212 | 0.723 | 0.58 | 1 | HC_vs_MS.Trt_B |
| BCAS1      | 1.41E-04 | 0.97715 | 0.345 | 0.25 | 1 | HC_vs_MS.Trt_B |
| BTBD1      | 1.41E-04 | 0.4005  | 0.572 | 0.47 | 1 | HC_vs_MS.Trt_B |
| PARPBP     | 1.41E-04 | -0.6905 | 0.37  | 0.26 | 1 | HC_vs_MS.Trt_B |
| ABCD4      | 1.41E-04 | -0.2711 | 0.79  | 0.67 | 1 | HC_vs_MS.Trt_B |
| WDR59      | 1.42E-04 | -0.2822 | 0.954 | 0.85 | 1 | HC_vs_MS.Trt_B |
| CP         | 1.42E-04 | 1.06034 | 0.148 | 0.08 | 1 | HC_vs_MS.Trt_B |
| APBB1      | 1.42E-04 | 0.32765 | 0.238 | 0.15 | 1 | HC_vs_MS.Trt_B |
| NRAS       | 1.43E-04 | 0.91589 | 0.304 | 0.21 | 1 | HC_vs_MS.Trt_B |
| GID4       | 1.44E-04 | 0.47832 | 0.675 | 0.54 | 1 | HC_vs_MS.Trt_B |
| SLC26A11   | 1.45E-04 | 0.31149 | 0.654 | 0.54 | 1 | HC_vs_MS.Trt_B |
| KCNMB4     | 1.45E-04 | 0.64002 | 0.293 | 0.2  | 1 | HC_vs_MS.Trt_B |
| CCDC113    | 1.46E-04 | 0.29792 | 0.639 | 0.54 | 1 | HC_vs_MS.Trt_B |
| AL022397.1 | 1.46E-04 | 0.36418 | 0.238 | 0.15 | 1 | HC_vs_MS.Trt_B |
| ERGIC2     | 1.47E-04 | -0.4301 | 0.471 | 0.35 | 1 | HC_vs_MS.Trt_B |
| ZFYVE16    | 1.47E-04 | -0.4041 | 0.883 | 0.83 | 1 | HC_vs_MS.Trt_B |
| DDOST      | 1.47E-04 | 0.29497 | 0.545 | 0.44 | 1 | HC_vs_MS.Trt_B |
| MPP6       | 1.48E-04 | 0.74644 | 0.278 | 0.19 | 1 | HC_vs_MS.Trt_B |
| PLA2G5     | 1.49E-04 | 0.28625 | 0.233 | 0.15 | 1 | HC_vs_MS.Trt_B |
| TMEM134    | 1.50E-04 | -0.3451 | 0.891 | 0.79 | 1 | HC_vs_MS.Trt_B |
| CFP        | 1.50E-04 | -0.6045 | 0.357 | 0.26 | 1 | HC_vs_MS.Trt_B |
| KIAA2013   | 1.51E-04 | -0.3475 | 0.307 | 0.21 | 1 | HC_vs_MS.Trt_B |
| IKBIP      | 1.53E-04 | 0.59574 | 0.439 | 0.33 | 1 | HC_vs_MS.Trt_B |
| TRAPPC11   | 1.54E-04 | 0.34361 | 0.413 | 0.31 | 1 | HC_vs_MS.Trt_B |
| SERTAD1    | 1.55E-04 | 0.82517 | 0.339 | 0.23 | 1 | HC_vs_MS.Trt_B |
| HSPA9      | 1.55E-04 | 0.54133 | 0.407 | 0.3  | 1 | HC_vs_MS.Trt_B |
| MTIF2      | 1.56E-04 | 1.95277 | 0.41  | 0.32 | 1 | HC_vs_MS.Trt_B |
| TPMT       | 1.56E-04 | -0.428  | 0.726 | 0.61 | 1 | HC_vs_MS.Trt_B |
| SVEP1      | 1.57E-04 | 0.31505 | 0.21  | 0.12 | 1 | HC_vs_MS.Trt_B |
| ACTR3C     | 1.57E-04 | 0.78115 | 0.523 | 0.42 | 1 | HC_vs_MS.Trt_B |
| VOPP1      | 1.58E-04 | 0.35341 | 0.326 | 0.23 | 1 | HC_vs_MS.Trt_B |
| PHTF2      | 1.59E-04 | 0.38708 | 0.345 | 0.25 | 1 | HC_vs_MS.Trt_B |
| ZNF781     | 1.59E-04 | 0.96068 | 0.291 | 0.19 | 1 | HC_vs_MS.Trt_B |
| DAAM2      | 1.59E-04 | 0.26377 | 0.381 | 0.28 | 1 | HC_vs_MS.Trt_B |
| METTL12    | 1.60E-04 | 0.6225  | 0.613 | 0.49 | 1 | HC_vs_MS.Trt_B |
| GYG1       | 1.60E-04 | 0.37027 | 0.542 | 0.43 | 1 | HC_vs_MS.Trt_B |
| TMEM2      | 1.62E-04 | -0.2622 | 0.584 | 0.47 | 1 | HC_vs_MS.Trt_B |
| NPIP3      | 1.64E-04 | -0.266  | 0.668 | 0.52 | 1 | HC_vs_MS.Trt_B |
| ATP6V0A1   | 1.64E-04 | 0.97626 | 0.828 | 0.73 | 1 | HC_vs_MS.Trt_B |

|           |          |         |       |      |   |                |
|-----------|----------|---------|-------|------|---|----------------|
| PSMA2     | 1.65E-04 | -0.3342 | 0.554 | 0.44 | 1 | HC_vs_MS.Trt_B |
| GTF3C5    | 1.66E-04 | 0.98076 | 0.301 | 0.21 | 1 | HC_vs_MS.Trt_B |
| GIT1      | 1.66E-04 | 0.81717 | 0.209 | 0.13 | 1 | HC_vs_MS.Trt_B |
| MAD2L1    | 1.67E-04 | -0.2802 | 0.435 | 0.33 | 1 | HC_vs_MS.Trt_B |
| LAT2      | 1.67E-04 | 0.25811 | 0.854 | 0.77 | 1 | HC_vs_MS.Trt_B |
| C20orf196 | 1.68E-04 | 0.59145 | 0.355 | 0.24 | 1 | HC_vs_MS.Trt_B |
| CENPM     | 1.68E-04 | -0.4817 | 0.3   | 0.19 | 1 | HC_vs_MS.Trt_B |
| SARM1     | 1.68E-04 | -0.2568 | 0.443 | 0.32 | 1 | HC_vs_MS.Trt_B |
| POGK      | 1.68E-04 | 1.22936 | 0.265 | 0.18 | 1 | HC_vs_MS.Trt_B |
| POU5F1    | 1.71E-04 | 0.38017 | 0.478 | 0.39 | 1 | HC_vs_MS.Trt_B |
| EML2      | 1.72E-04 | 0.59294 | 0.7   | 0.58 | 1 | HC_vs_MS.Trt_B |
| ZBTB25    | 1.72E-04 | -0.3428 | 0.955 | 0.89 | 1 | HC_vs_MS.Trt_B |
| NFASC     | 1.73E-04 | -0.3483 | 0.584 | 0.48 | 1 | HC_vs_MS.Trt_B |
| SETD1B    | 1.75E-04 | 0.85747 | 0.201 | 0.12 | 1 | HC_vs_MS.Trt_B |
| MFSD13A   | 1.77E-04 | 0.38859 | 0.712 | 0.58 | 1 | HC_vs_MS.Trt_B |
| TMEM68    | 1.77E-04 | 0.28864 | 0.871 | 0.8  | 1 | HC_vs_MS.Trt_B |
| CORIN     | 1.77E-04 | 0.27358 | 0.574 | 0.47 | 1 | HC_vs_MS.Trt_B |
| SERPINB6  | 1.77E-04 | -0.3902 | 0.484 | 0.37 | 1 | HC_vs_MS.Trt_B |
| SLC25A43  | 1.77E-04 | 0.40665 | 0.241 | 0.15 | 1 | HC_vs_MS.Trt_B |
| PTCH1     | 1.78E-04 | 0.39908 | 0.606 | 0.47 | 1 | HC_vs_MS.Trt_B |
| GFOD1     | 1.79E-04 | 0.43018 | 0.593 | 0.5  | 1 | HC_vs_MS.Trt_B |
| ERO1A     | 1.79E-04 | -0.251  | 0.867 | 0.79 | 1 | HC_vs_MS.Trt_B |
| KDM5D     | 1.81E-04 | 1.91143 | 0.316 | 0.22 | 1 | HC_vs_MS.Trt_B |
| EIF2A     | 1.82E-04 | -0.3036 | 0.597 | 0.47 | 1 | HC_vs_MS.Trt_B |
| MPHOSPH9  | 1.82E-04 | 0.28217 | 0.806 | 0.75 | 1 | HC_vs_MS.Trt_B |
| PCYT1B    | 1.83E-04 | 0.29445 | 0.483 | 0.4  | 1 | HC_vs_MS.Trt_B |
| CBX1      | 1.85E-04 | 0.52267 | 0.272 | 0.18 | 1 | HC_vs_MS.Trt_B |
| LMBR1     | 1.86E-04 | 0.38261 | 0.507 | 0.39 | 1 | HC_vs_MS.Trt_B |
| NBPF19    | 1.87E-04 | 0.30757 | 0.446 | 0.34 | 1 | HC_vs_MS.Trt_B |
| PKD2L2    | 1.87E-04 | 0.26738 | 0.687 | 0.56 | 1 | HC_vs_MS.Trt_B |
| FBXL5     | 1.87E-04 | 0.32424 | 0.301 | 0.21 | 1 | HC_vs_MS.Trt_B |
| OR7D2     | 1.87E-04 | 0.45025 | 0.249 | 0.16 | 1 | HC_vs_MS.Trt_B |
| TMCO3     | 1.89E-04 | 0.43804 | 0.716 | 0.58 | 1 | HC_vs_MS.Trt_B |
| PSMD13    | 1.89E-04 | -0.3401 | 0.52  | 0.38 | 1 | HC_vs_MS.Trt_B |
| ENDOV     | 1.90E-04 | 0.51477 | 0.577 | 0.48 | 1 | HC_vs_MS.Trt_B |
| NAT10     | 1.90E-04 | 0.25338 | 0.354 | 0.25 | 1 | HC_vs_MS.Trt_B |
| DPH1      | 1.90E-04 | 0.35623 | 0.855 | 0.8  | 1 | HC_vs_MS.Trt_B |
| LYL1      | 1.91E-04 | 0.43764 | 0.397 | 0.29 | 1 | HC_vs_MS.Trt_B |
| MAPK3     | 1.95E-04 | 0.26787 | 0.794 | 0.69 | 1 | HC_vs_MS.Trt_B |
| XPNPEP1   | 1.95E-04 | 0.38879 | 0.287 | 0.19 | 1 | HC_vs_MS.Trt_B |

|            |          |         |       |      |   |                |
|------------|----------|---------|-------|------|---|----------------|
| CPT1A      | 1.96E-04 | 0.40375 | 0.629 | 0.55 | 1 | HC_vs_MS.Trt_B |
| NIT1       | 1.96E-04 | 0.33887 | 0.604 | 0.47 | 1 | HC_vs_MS.Trt_B |
| TMEM33     | 1.98E-04 | -0.4806 | 0.87  | 0.8  | 1 | HC_vs_MS.Trt_B |
| SCYL3      | 1.99E-04 | 0.33435 | 0.659 | 0.58 | 1 | HC_vs_MS.Trt_B |
| SLK        | 1.99E-04 | 0.36475 | 0.196 | 0.12 | 1 | HC_vs_MS.Trt_B |
| TLN1       | 2.01E-04 | 0.36142 | 0.575 | 0.48 | 1 | HC_vs_MS.Trt_B |
| BTF3L4     | 2.03E-04 | 0.56032 | 0.429 | 0.34 | 1 | HC_vs_MS.Trt_B |
| NUP133     | 2.03E-04 | 0.62729 | 0.499 | 0.39 | 1 | HC_vs_MS.Trt_B |
| PHLDA1     | 2.04E-04 | 0.5759  | 0.459 | 0.36 | 1 | HC_vs_MS.Trt_B |
| PMS2       | 2.07E-04 | 0.26109 | 0.662 | 0.56 | 1 | HC_vs_MS.Trt_B |
| SLC30A6    | 2.07E-04 | -0.4506 | 0.607 | 0.5  | 1 | HC_vs_MS.Trt_B |
| HOMER2     | 2.08E-04 | -0.9314 | 0.552 | 0.46 | 1 | HC_vs_MS.Trt_B |
| ATP7B      | 2.09E-04 | 0.70655 | 0.2   | 0.12 | 1 | HC_vs_MS.Trt_B |
| PTK2B      | 2.10E-04 | 0.4759  | 0.393 | 0.29 | 1 | HC_vs_MS.Trt_B |
| NRF1       | 2.10E-04 | 0.44663 | 0.29  | 0.2  | 1 | HC_vs_MS.Trt_B |
| IRGM       | 2.13E-04 | 0.47808 | 0.396 | 0.29 | 1 | HC_vs_MS.Trt_B |
| FAM186A    | 2.13E-04 | 0.31708 | 0.407 | 0.3  | 1 | HC_vs_MS.Trt_B |
| RP11-849H4 | 2.15E-04 | 0.27317 | 0.596 | 0.48 | 1 | HC_vs_MS.Trt_B |
| EME2       | 2.16E-04 | 0.68276 | 0.286 | 0.19 | 1 | HC_vs_MS.Trt_B |
| RPS6KA6    | 2.16E-04 | 0.32761 | 0.552 | 0.46 | 1 | HC_vs_MS.Trt_B |
| ZAP70      | 2.18E-04 | 0.36765 | 0.464 | 0.36 | 1 | HC_vs_MS.Trt_B |
| GP6        | 2.19E-04 | 0.64504 | 0.459 | 0.35 | 1 | HC_vs_MS.Trt_B |
| GNB2       | 2.19E-04 | 0.47199 | 0.491 | 0.38 | 1 | HC_vs_MS.Trt_B |
| BTBD11     | 2.19E-04 | 0.43013 | 0.457 | 0.34 | 1 | HC_vs_MS.Trt_B |
| RBM43      | 2.19E-04 | 0.66232 | 0.59  | 0.48 | 1 | HC_vs_MS.Trt_B |
| BFAR       | 2.20E-04 | 0.73893 | 0.53  | 0.43 | 1 | HC_vs_MS.Trt_B |
| MME        | 2.20E-04 | 0.33111 | 0.439 | 0.33 | 1 | HC_vs_MS.Trt_B |
| SIKE1      | 2.22E-04 | 0.56759 | 0.394 | 0.29 | 1 | HC_vs_MS.Trt_B |
| STAG3      | 2.24E-04 | 0.96943 | 0.18  | 0.1  | 1 | HC_vs_MS.Trt_B |
| FAM110C    | 2.24E-04 | 0.86617 | 0.242 | 0.16 | 1 | HC_vs_MS.Trt_B |
| STIM1      | 2.25E-04 | 0.27984 | 0.523 | 0.41 | 1 | HC_vs_MS.Trt_B |
| WNT7A      | 2.26E-04 | 1.58461 | 0.103 | 0.04 | 1 | HC_vs_MS.Trt_B |
| CNPPD1     | 2.26E-04 | 0.29809 | 0.293 | 0.2  | 1 | HC_vs_MS.Trt_B |
| ZBTB24     | 2.27E-04 | 0.32005 | 0.341 | 0.25 | 1 | HC_vs_MS.Trt_B |
| FEZ2       | 2.27E-04 | 0.75218 | 0.446 | 0.34 | 1 | HC_vs_MS.Trt_B |
| ZNF266     | 2.28E-04 | 0.4364  | 0.335 | 0.24 | 1 | HC_vs_MS.Trt_B |
| KCTD1      | 2.28E-04 | 0.27949 | 0.572 | 0.48 | 1 | HC_vs_MS.Trt_B |
| MAST4      | 2.28E-04 | 0.36171 | 0.591 | 0.48 | 1 | HC_vs_MS.Trt_B |
| TUBGCP3    | 2.28E-04 | 0.59841 | 0.167 | 0.09 | 1 | HC_vs_MS.Trt_B |
| TNRC6A     | 2.29E-04 | 0.26126 | 0.764 | 0.7  | 1 | HC_vs_MS.Trt_B |

|          |          |         |       |      |   |                |
|----------|----------|---------|-------|------|---|----------------|
| CATSPERB | 2.30E-04 | 0.4004  | 0.622 | 0.51 | 1 | HC_vs_MS.Trt_B |
| CHML     | 2.31E-04 | 0.54617 | 0.235 | 0.15 | 1 | HC_vs_MS.Trt_B |
| USE1     | 2.32E-04 | 0.26003 | 0.852 | 0.77 | 1 | HC_vs_MS.Trt_B |
| NDUFA11  | 2.33E-04 | -0.3748 | 0.594 | 0.45 | 1 | HC_vs_MS.Trt_B |
| SNF8     | 2.34E-04 | -0.2592 | 0.826 | 0.73 | 1 | HC_vs_MS.Trt_B |
| KMT5B    | 2.38E-04 | 1.11812 | 0.294 | 0.21 | 1 | HC_vs_MS.Trt_B |
| ELP4     | 2.40E-04 | -0.3542 | 0.529 | 0.44 | 1 | HC_vs_MS.Trt_B |
| TMEM219  | 2.42E-04 | 0.32254 | 0.236 | 0.15 | 1 | HC_vs_MS.Trt_B |
| NDUFS7   | 2.44E-04 | -0.3928 | 0.725 | 0.59 | 1 | HC_vs_MS.Trt_B |
| IFNGR2   | 2.44E-04 | 0.28503 | 0.31  | 0.23 | 1 | HC_vs_MS.Trt_B |
| SEC24D   | 2.45E-04 | 0.45428 | 0.484 | 0.38 | 1 | HC_vs_MS.Trt_B |
| FCRL1    | 2.49E-04 | 1.17498 | 0.249 | 0.16 | 1 | HC_vs_MS.Trt_B |
| TRAPPC3  | 2.50E-04 | 0.35921 | 0.372 | 0.28 | 1 | HC_vs_MS.Trt_B |
| ZDHHC4   | 2.52E-04 | 0.36966 | 0.401 | 0.29 | 1 | HC_vs_MS.Trt_B |
| GOLGA2   | 2.52E-04 | 0.49828 | 0.636 | 0.5  | 1 | HC_vs_MS.Trt_B |
| ZNF835   | 2.54E-04 | 0.34258 | 0.558 | 0.45 | 1 | HC_vs_MS.Trt_B |
| SGTA     | 2.55E-04 | 0.39393 | 0.506 | 0.4  | 1 | HC_vs_MS.Trt_B |
| NF1      | 2.55E-04 | 0.26683 | 0.723 | 0.62 | 1 | HC_vs_MS.Trt_B |
| MIEF1    | 2.59E-04 | -0.3013 | 0.465 | 0.35 | 1 | HC_vs_MS.Trt_B |
| USP10    | 2.61E-04 | 0.43343 | 0.243 | 0.16 | 1 | HC_vs_MS.Trt_B |
| ADAMTS17 | 2.61E-04 | -0.7978 | 0.194 | 0.12 | 1 | HC_vs_MS.Trt_B |
| ZNF681   | 2.63E-04 | -0.3481 | 0.649 | 0.55 | 1 | HC_vs_MS.Trt_B |
| FAS      | 2.63E-04 | 0.35143 | 0.348 | 0.24 | 1 | HC_vs_MS.Trt_B |
| SLC47A2  | 2.63E-04 | -0.3159 | 0.233 | 0.15 | 1 | HC_vs_MS.Trt_B |
| MYOM1    | 2.64E-04 | 0.43624 | 0.264 | 0.17 | 1 | HC_vs_MS.Trt_B |
| WAS      | 2.64E-04 | 0.82488 | 0.278 | 0.19 | 1 | HC_vs_MS.Trt_B |
| CD7      | 2.65E-04 | 0.96178 | 0.242 | 0.16 | 1 | HC_vs_MS.Trt_B |
| CWF19L2  | 2.71E-04 | 0.28675 | 0.316 | 0.22 | 1 | HC_vs_MS.Trt_B |
| CLCN5    | 2.72E-04 | 0.35658 | 0.28  | 0.18 | 1 | HC_vs_MS.Trt_B |
| SEL1L    | 2.72E-04 | 0.9471  | 0.193 | 0.12 | 1 | HC_vs_MS.Trt_B |
| ZNF425   | 2.73E-04 | 0.35041 | 0.393 | 0.29 | 1 | HC_vs_MS.Trt_B |
| GPR132   | 2.73E-04 | 0.5492  | 0.372 | 0.27 | 1 | HC_vs_MS.Trt_B |
| HES2     | 2.73E-04 | 0.25181 | 0.587 | 0.51 | 1 | HC_vs_MS.Trt_B |
| SRSF1    | 2.74E-04 | 0.34103 | 0.496 | 0.41 | 1 | HC_vs_MS.Trt_B |
| PARP12   | 2.78E-04 | 0.3886  | 0.245 | 0.16 | 1 | HC_vs_MS.Trt_B |
| ATP6V1H  | 2.78E-04 | 0.71292 | 0.371 | 0.27 | 1 | HC_vs_MS.Trt_B |
| NUCKS1   | 2.79E-04 | -0.2573 | 0.496 | 0.39 | 1 | HC_vs_MS.Trt_B |
| GPSM3    | 2.80E-04 | 0.26948 | 0.454 | 0.35 | 1 | HC_vs_MS.Trt_B |
| LMF2     | 2.81E-04 | 0.42034 | 0.213 | 0.13 | 1 | HC_vs_MS.Trt_B |
| PIM1     | 2.82E-04 | 0.37463 | 0.384 | 0.28 | 1 | HC_vs_MS.Trt_B |

|             |          |         |       |      |   |                |
|-------------|----------|---------|-------|------|---|----------------|
| ZBTB37      | 2.83E-04 | 0.49987 | 0.664 | 0.55 | 1 | HC_vs_MS.Trt_B |
| ABHD6       | 2.84E-04 | -0.4756 | 0.461 | 0.34 | 1 | HC_vs_MS.Trt_B |
| DNAJA1      | 2.85E-04 | 0.25295 | 0.286 | 0.19 | 1 | HC_vs_MS.Trt_B |
| TBRG4       | 2.85E-04 | 0.78673 | 0.391 | 0.29 | 1 | HC_vs_MS.Trt_B |
| SETD5       | 2.87E-04 | 0.39958 | 0.496 | 0.39 | 1 | HC_vs_MS.Trt_B |
| MDH1        | 2.90E-04 | -0.3559 | 0.609 | 0.49 | 1 | HC_vs_MS.Trt_B |
| SLC25A53    | 2.90E-04 | -0.5412 | 0.425 | 0.32 | 1 | HC_vs_MS.Trt_B |
| FUT9        | 2.90E-04 | 0.26692 | 0.368 | 0.28 | 1 | HC_vs_MS.Trt_B |
| RP11-226E2  | 2.90E-04 | -0.5873 | 0.635 | 0.52 | 1 | HC_vs_MS.Trt_B |
| ZNF213      | 2.91E-04 | 0.80713 | 0.455 | 0.33 | 1 | HC_vs_MS.Trt_B |
| ZNF720      | 2.92E-04 | -0.2667 | 0.497 | 0.38 | 1 | HC_vs_MS.Trt_B |
| C1orf27     | 2.94E-04 | 1.39708 | 0.155 | 0.08 | 1 | HC_vs_MS.Trt_B |
| RSL1D1      | 2.95E-04 | -0.3149 | 0.846 | 0.73 | 1 | HC_vs_MS.Trt_B |
| RALGAPA2    | 2.97E-04 | 0.81241 | 0.149 | 0.08 | 1 | HC_vs_MS.Trt_B |
| RSRC1       | 2.98E-04 | -0.555  | 0.739 | 0.6  | 1 | HC_vs_MS.Trt_B |
| DEPDC4      | 2.99E-04 | 0.40158 | 0.438 | 0.34 | 1 | HC_vs_MS.Trt_B |
| CTD-2192J10 | 3.01E-04 | 0.898   | 0.454 | 0.35 | 1 | HC_vs_MS.Trt_B |
| FBXL17      | 3.05E-04 | 0.47937 | 0.243 | 0.16 | 1 | HC_vs_MS.Trt_B |
| NSMCE3      | 3.05E-04 | 1.1357  | 0.319 | 0.22 | 1 | HC_vs_MS.Trt_B |
| MBP         | 3.06E-04 | 0.40504 | 0.384 | 0.28 | 1 | HC_vs_MS.Trt_B |
| CES4A       | 3.08E-04 | 0.36001 | 0.507 | 0.42 | 1 | HC_vs_MS.Trt_B |
| ZNF284      | 3.10E-04 | -0.8712 | 0.558 | 0.43 | 1 | HC_vs_MS.Trt_B |
| IL1R1       | 3.11E-04 | 0.72823 | 0.317 | 0.22 | 1 | HC_vs_MS.Trt_B |
| SPON2       | 3.13E-04 | 0.64771 | 0.383 | 0.28 | 1 | HC_vs_MS.Trt_B |
| LRRC69      | 3.13E-04 | 0.33512 | 0.575 | 0.47 | 1 | HC_vs_MS.Trt_B |
| USP38       | 3.15E-04 | 0.44587 | 0.312 | 0.22 | 1 | HC_vs_MS.Trt_B |
| RBM7        | 3.15E-04 | -0.3907 | 0.674 | 0.6  | 1 | HC_vs_MS.Trt_B |
| KIAA1755    | 3.15E-04 | 0.37909 | 0.194 | 0.12 | 1 | HC_vs_MS.Trt_B |
| MAPK1IP1L   | 3.15E-04 | -0.2579 | 0.799 | 0.68 | 1 | HC_vs_MS.Trt_B |
| TBC1D2B     | 3.16E-04 | 1.18352 | 0.294 | 0.21 | 1 | HC_vs_MS.Trt_B |
| SARDH       | 3.17E-04 | 0.58806 | 0.388 | 0.29 | 1 | HC_vs_MS.Trt_B |
| BCL7B       | 3.19E-04 | 0.41313 | 0.455 | 0.37 | 1 | HC_vs_MS.Trt_B |
| TECRL       | 3.21E-04 | 0.27275 | 0.217 | 0.13 | 1 | HC_vs_MS.Trt_B |
| RABIF       | 3.21E-04 | 0.87989 | 0.364 | 0.26 | 1 | HC_vs_MS.Trt_B |
| GUSB        | 3.23E-04 | -0.2511 | 0.681 | 0.58 | 1 | HC_vs_MS.Trt_B |
| CDC42EP3    | 3.25E-04 | 0.26841 | 0.461 | 0.35 | 1 | HC_vs_MS.Trt_B |
| ELAVL1      | 3.27E-04 | 0.36976 | 0.961 | 0.92 | 1 | HC_vs_MS.Trt_B |
| RP11-9J18.1 | 3.27E-04 | 0.26928 | 0.262 | 0.17 | 1 | HC_vs_MS.Trt_B |
| ZNF696      | 3.27E-04 | -0.2829 | 0.316 | 0.22 | 1 | HC_vs_MS.Trt_B |
| GBP2        | 3.29E-04 | 0.39318 | 0.416 | 0.32 | 1 | HC_vs_MS.Trt_B |

|            |          |         |       |      |   |                |
|------------|----------|---------|-------|------|---|----------------|
| CTB-133G6. | 3.35E-04 | 0.42841 | 0.268 | 0.18 | 1 | HC_vs_MS.Trt_B |
| C1GALT1    | 3.36E-04 | 0.27736 | 0.564 | 0.47 | 1 | HC_vs_MS.Trt_B |
| CD93       | 3.38E-04 | 0.50337 | 0.196 | 0.12 | 1 | HC_vs_MS.Trt_B |
| U2AF1L4    | 3.38E-04 | -0.2609 | 0.786 | 0.69 | 1 | HC_vs_MS.Trt_B |
| UBFD1      | 3.38E-04 | 0.59154 | 0.367 | 0.26 | 1 | HC_vs_MS.Trt_B |
| DNAJC14    | 3.40E-04 | 0.32047 | 0.599 | 0.5  | 1 | HC_vs_MS.Trt_B |
| FBXL8      | 3.41E-04 | 0.48978 | 0.539 | 0.45 | 1 | HC_vs_MS.Trt_B |
| XAB2       | 3.47E-04 | 0.69689 | 0.228 | 0.14 | 1 | HC_vs_MS.Trt_B |
| EPHX2      | 3.48E-04 | 0.66891 | 0.294 | 0.21 | 1 | HC_vs_MS.Trt_B |
| KCNK3      | 3.51E-04 | 0.35242 | 0.609 | 0.49 | 1 | HC_vs_MS.Trt_B |
| PTPN12     | 3.52E-04 | 0.43261 | 0.717 | 0.63 | 1 | HC_vs_MS.Trt_B |
| ANGPT2     | 3.53E-04 | 0.45954 | 0.726 | 0.65 | 1 | HC_vs_MS.Trt_B |
| WDR76      | 3.53E-04 | 0.26009 | 0.658 | 0.55 | 1 | HC_vs_MS.Trt_B |
| U2AF1L5    | 3.54E-04 | -0.2572 | 0.632 | 0.51 | 1 | HC_vs_MS.Trt_B |
| QSOX2      | 3.57E-04 | -0.7588 | 0.158 | 0.09 | 1 | HC_vs_MS.Trt_B |
| RCCD1      | 3.57E-04 | 0.26309 | 0.178 | 0.1  | 1 | HC_vs_MS.Trt_B |
| TAF11      | 3.57E-04 | 0.62468 | 0.483 | 0.35 | 1 | HC_vs_MS.Trt_B |
| MED11      | 3.58E-04 | -0.3163 | 0.691 | 0.6  | 1 | HC_vs_MS.Trt_B |
| FAM105A    | 3.60E-04 | -0.2782 | 0.275 | 0.18 | 1 | HC_vs_MS.Trt_B |
| WDR41      | 3.60E-04 | -0.3354 | 0.422 | 0.32 | 1 | HC_vs_MS.Trt_B |
| PDE4D      | 3.60E-04 | 0.49547 | 0.304 | 0.22 | 1 | HC_vs_MS.Trt_B |
| GSTM2      | 3.61E-04 | -0.3594 | 0.39  | 0.28 | 1 | HC_vs_MS.Trt_B |
| ZCCHC7     | 3.61E-04 | 0.28535 | 0.312 | 0.22 | 1 | HC_vs_MS.Trt_B |
| C8orf33    | 3.63E-04 | 0.96709 | 0.206 | 0.12 | 1 | HC_vs_MS.Trt_B |
| SUPT5H     | 3.63E-04 | 0.34993 | 0.425 | 0.32 | 1 | HC_vs_MS.Trt_B |
| TNFRSF14   | 3.65E-04 | 0.28038 | 0.32  | 0.22 | 1 | HC_vs_MS.Trt_B |
| SPECC1L-AD | 3.69E-04 | 0.58515 | 0.187 | 0.11 | 1 | HC_vs_MS.Trt_B |
| CCDC120    | 3.70E-04 | 0.6161  | 0.464 | 0.36 | 1 | HC_vs_MS.Trt_B |
| HMGCR      | 3.70E-04 | -0.4782 | 0.68  | 0.57 | 1 | HC_vs_MS.Trt_B |
| TIMM17A    | 3.72E-04 | -0.3171 | 0.89  | 0.8  | 1 | HC_vs_MS.Trt_B |
| MFSD8      | 3.73E-04 | 0.37982 | 0.377 | 0.29 | 1 | HC_vs_MS.Trt_B |
| WTAP       | 3.75E-04 | -0.6287 | 0.593 | 0.66 | 1 | HC_vs_MS.Trt_B |
| IGBP1      | 3.78E-04 | 0.58034 | 0.213 | 0.13 | 1 | HC_vs_MS.Trt_B |
| CCDC117    | 3.78E-04 | -0.7049 | 0.299 | 0.21 | 1 | HC_vs_MS.Trt_B |
| LIN54      | 3.78E-04 | 0.68618 | 0.548 | 0.44 | 1 | HC_vs_MS.Trt_B |
| ESR2       | 3.79E-04 | 0.40075 | 0.542 | 0.42 | 1 | HC_vs_MS.Trt_B |
| HERC5      | 3.79E-04 | 0.48473 | 0.21  | 0.13 | 1 | HC_vs_MS.Trt_B |
| PSMD3      | 3.82E-04 | 0.31464 | 0.51  | 0.39 | 1 | HC_vs_MS.Trt_B |
| PDZK1      | 3.84E-04 | 0.42261 | 0.299 | 0.21 | 1 | HC_vs_MS.Trt_B |
| NBEAL1     | 3.86E-04 | 0.46787 | 0.87  | 0.78 | 1 | HC_vs_MS.Trt_B |

|            |          |         |       |      |   |                |
|------------|----------|---------|-------|------|---|----------------|
| C9orf85    | 3.87E-04 | -0.3396 | 0.865 | 0.8  | 1 | HC_vs_MS.Trt_B |
| NDRG3      | 3.87E-04 | 0.32513 | 0.374 | 0.28 | 1 | HC_vs_MS.Trt_B |
| ZNF783     | 3.88E-04 | 0.59785 | 0.442 | 0.34 | 1 | HC_vs_MS.Trt_B |
| MYO10      | 3.89E-04 | 0.41412 | 0.667 | 0.59 | 1 | HC_vs_MS.Trt_B |
| SEMA4F     | 3.90E-04 | 0.65993 | 0.486 | 0.4  | 1 | HC_vs_MS.Trt_B |
| IL17RE     | 3.90E-04 | 0.25198 | 0.259 | 0.17 | 1 | HC_vs_MS.Trt_B |
| TEX10      | 3.93E-04 | -0.4351 | 0.465 | 0.35 | 1 | HC_vs_MS.Trt_B |
| TMEM39B    | 3.94E-04 | 0.50707 | 0.17  | 0.1  | 1 | HC_vs_MS.Trt_B |
| ABO        | 3.94E-04 | 0.4201  | 0.362 | 0.27 | 1 | HC_vs_MS.Trt_B |
| RP11-1070B | 3.94E-04 | 0.26704 | 0.186 | 0.11 | 1 | HC_vs_MS.Trt_B |
| RRP1       | 3.94E-04 | -0.8036 | 0.638 | 0.54 | 1 | HC_vs_MS.Trt_B |
| PIP5K1A    | 3.94E-04 | 0.47301 | 0.493 | 0.39 | 1 | HC_vs_MS.Trt_B |
| POLR1A     | 3.96E-04 | -0.4075 | 0.672 | 0.56 | 1 | HC_vs_MS.Trt_B |
| SLC44A2    | 3.97E-04 | 0.27976 | 0.722 | 0.64 | 1 | HC_vs_MS.Trt_B |
| EPB41L4A   | 3.98E-04 | -0.522  | 0.561 | 0.46 | 1 | HC_vs_MS.Trt_B |
| MARS       | 3.99E-04 | 0.39568 | 0.381 | 0.29 | 1 | HC_vs_MS.Trt_B |
| ADAL       | 4.01E-04 | -0.3713 | 0.414 | 0.3  | 1 | HC_vs_MS.Trt_B |
| HHLA3      | 4.01E-04 | 0.63139 | 0.343 | 0.25 | 1 | HC_vs_MS.Trt_B |
| PHF7       | 4.02E-04 | 0.46467 | 0.459 | 0.35 | 1 | HC_vs_MS.Trt_B |
| DDX3X      | 4.03E-04 | -0.3104 | 0.329 | 0.22 | 1 | HC_vs_MS.Trt_B |
| CALM3      | 4.04E-04 | 0.32034 | 0.43  | 0.34 | 1 | HC_vs_MS.Trt_B |
| SNX22      | 4.04E-04 | 0.44616 | 0.803 | 0.66 | 1 | HC_vs_MS.Trt_B |
| ATF2       | 4.05E-04 | 0.35935 | 0.213 | 0.14 | 1 | HC_vs_MS.Trt_B |
| CRELD2     | 4.06E-04 | 0.28177 | 0.574 | 0.47 | 1 | HC_vs_MS.Trt_B |
| PRRG3      | 4.08E-04 | 1.0817  | 0.597 | 0.51 | 1 | HC_vs_MS.Trt_B |
| NTRK1      | 4.10E-04 | 0.54787 | 0.109 | 0.05 | 1 | HC_vs_MS.Trt_B |
| SPCS3      | 4.11E-04 | 0.25553 | 0.491 | 0.39 | 1 | HC_vs_MS.Trt_B |
| ADI1       | 4.14E-04 | -0.3804 | 0.735 | 0.65 | 1 | HC_vs_MS.Trt_B |
| POMK       | 4.14E-04 | 0.52934 | 0.536 | 0.43 | 1 | HC_vs_MS.Trt_B |
| GPR83      | 4.16E-04 | -0.5469 | 0.458 | 0.36 | 1 | HC_vs_MS.Trt_B |
| ACACA      | 4.17E-04 | 0.79793 | 0.59  | 0.46 | 1 | HC_vs_MS.Trt_B |
| FUBP1      | 4.19E-04 | 0.3522  | 0.362 | 0.27 | 1 | HC_vs_MS.Trt_B |
| NUDT15     | 4.21E-04 | 0.47381 | 0.545 | 0.44 | 1 | HC_vs_MS.Trt_B |
| UHRF2      | 4.22E-04 | 0.67008 | 0.251 | 0.17 | 1 | HC_vs_MS.Trt_B |
| NDUFS3     | 4.25E-04 | -0.5806 | 0.554 | 0.43 | 1 | HC_vs_MS.Trt_B |
| C2orf50    | 4.34E-04 | 0.39255 | 0.351 | 0.26 | 1 | HC_vs_MS.Trt_B |
| GNPNAT1    | 4.34E-04 | -0.3084 | 0.513 | 0.4  | 1 | HC_vs_MS.Trt_B |
| LZTS1      | 4.37E-04 | 0.32881 | 0.325 | 0.23 | 1 | HC_vs_MS.Trt_B |
| BPNT1      | 4.39E-04 | 0.38821 | 0.659 | 0.57 | 1 | HC_vs_MS.Trt_B |
| ARSG       | 4.39E-04 | -0.2687 | 0.894 | 0.85 | 1 | HC_vs_MS.Trt_B |

|            |          |         |       |      |   |                |
|------------|----------|---------|-------|------|---|----------------|
| CADPS      | 4.40E-04 | 0.34294 | 0.33  | 0.24 | 1 | HC_vs_MS.Trt_B |
| AK5        | 4.40E-04 | 1.06369 | 0.142 | 0.07 | 1 | HC_vs_MS.Trt_B |
| GLDN       | 4.42E-04 | 0.31217 | 0.206 | 0.13 | 1 | HC_vs_MS.Trt_B |
| MYO5A      | 4.43E-04 | 0.3064  | 0.755 | 0.65 | 1 | HC_vs_MS.Trt_B |
| CTD-2207O2 | 4.44E-04 | 0.7868  | 0.167 | 0.1  | 1 | HC_vs_MS.Trt_B |
| TMEM5      | 4.44E-04 | -0.3758 | 0.497 | 0.39 | 1 | HC_vs_MS.Trt_B |
| MTHFR      | 4.47E-04 | -0.2671 | 0.809 | 0.7  | 1 | HC_vs_MS.Trt_B |
| MTHFD2L    | 4.47E-04 | 0.25776 | 0.497 | 0.39 | 1 | HC_vs_MS.Trt_B |
| WDFY2      | 4.49E-04 | 0.73236 | 0.558 | 0.47 | 1 | HC_vs_MS.Trt_B |
| CD38       | 4.50E-04 | 0.63956 | 0.335 | 0.25 | 1 | HC_vs_MS.Trt_B |
| PSEN1      | 4.51E-04 | -0.4502 | 0.68  | 0.58 | 1 | HC_vs_MS.Trt_B |
| C16orf54   | 4.52E-04 | -0.8031 | 0.761 | 0.73 | 1 | HC_vs_MS.Trt_B |
| ANAPC4     | 4.53E-04 | 0.56241 | 0.262 | 0.18 | 1 | HC_vs_MS.Trt_B |
| PCGF6      | 4.59E-04 | -0.3004 | 0.701 | 0.59 | 1 | HC_vs_MS.Trt_B |
| TXNL4A     | 4.60E-04 | -0.5667 | 0.471 | 0.38 | 1 | HC_vs_MS.Trt_B |
| ETV3       | 4.63E-04 | 0.48286 | 0.12  | 0.06 | 1 | HC_vs_MS.Trt_B |
| METRNL     | 4.68E-04 | -0.4827 | 0.12  | 0.06 | 1 | HC_vs_MS.Trt_B |
| PQLC1      | 4.70E-04 | 0.28263 | 0.448 | 0.34 | 1 | HC_vs_MS.Trt_B |
| ABHD18     | 4.72E-04 | 0.26891 | 0.833 | 0.73 | 1 | HC_vs_MS.Trt_B |
| GABRE      | 4.74E-04 | 0.3444  | 0.206 | 0.13 | 1 | HC_vs_MS.Trt_B |
| BTBD19     | 4.76E-04 | -0.2891 | 0.726 | 0.63 | 1 | HC_vs_MS.Trt_B |
| MCF2L      | 4.79E-04 | 0.49735 | 0.303 | 0.21 | 1 | HC_vs_MS.Trt_B |
| AIFM2      | 4.80E-04 | -0.8014 | 0.354 | 0.26 | 1 | HC_vs_MS.Trt_B |
| BUB1B      | 4.84E-04 | 0.32765 | 0.378 | 0.3  | 1 | HC_vs_MS.Trt_B |
| ARHGEF6    | 4.86E-04 | 0.37742 | 0.339 | 0.25 | 1 | HC_vs_MS.Trt_B |
| ERCC4      | 4.88E-04 | -0.2743 | 0.858 | 0.79 | 1 | HC_vs_MS.Trt_B |
| SLC7A11    | 4.88E-04 | 0.27549 | 0.449 | 0.37 | 1 | HC_vs_MS.Trt_B |
| HLTF       | 4.90E-04 | -0.3526 | 0.513 | 0.4  | 1 | HC_vs_MS.Trt_B |
| RTF1       | 4.94E-04 | -0.3146 | 0.557 | 0.45 | 1 | HC_vs_MS.Trt_B |
| FAM179A    | 4.95E-04 | -0.5843 | 0.772 | 0.68 | 1 | HC_vs_MS.Trt_B |
| CTTNBP2NL  | 4.95E-04 | 0.43894 | 0.441 | 0.34 | 1 | HC_vs_MS.Trt_B |
| WDR1       | 4.96E-04 | 0.25196 | 0.377 | 0.28 | 1 | HC_vs_MS.Trt_B |
| CDC14A     | 4.96E-04 | -0.3193 | 0.229 | 0.14 | 1 | HC_vs_MS.Trt_B |
| GTF2H2C    | 4.97E-04 | 0.49608 | 0.439 | 0.35 | 1 | HC_vs_MS.Trt_B |
| NEIL1      | 4.97E-04 | 0.35157 | 0.757 | 0.65 | 1 | HC_vs_MS.Trt_B |
| UBE2W      | 4.98E-04 | -0.258  | 0.626 | 0.5  | 1 | HC_vs_MS.Trt_B |
| GNG7       | 4.98E-04 | 0.29559 | 0.394 | 0.29 | 1 | HC_vs_MS.Trt_B |
| GLCE       | 5.04E-04 | 0.96073 | 0.141 | 0.07 | 1 | HC_vs_MS.Trt_B |
| SGK1       | 5.07E-04 | 0.3745  | 0.371 | 0.27 | 1 | HC_vs_MS.Trt_B |
| C1orf216   | 5.10E-04 | -0.386  | 0.81  | 0.68 | 1 | HC_vs_MS.Trt_B |



|           |          |         |       |      |   |                |
|-----------|----------|---------|-------|------|---|----------------|
| GMIP      | 5.11E-04 | 0.30763 | 0.254 | 0.17 | 1 | HC_vs_MS.Trt_B |
| RPL6      | 5.18E-04 | -0.262  | 0.962 | 0.92 | 1 | HC_vs_MS.Trt_B |
| PCSK2     | 5.18E-04 | 0.31005 | 0.28  | 0.19 | 1 | HC_vs_MS.Trt_B |
| FBXO16    | 5.18E-04 | 0.28833 | 0.262 | 0.18 | 1 | HC_vs_MS.Trt_B |
| NDUFA2    | 5.19E-04 | -0.4069 | 0.445 | 0.33 | 1 | HC_vs_MS.Trt_B |
| TAB3      | 5.19E-04 | -0.3839 | 0.674 | 0.56 | 1 | HC_vs_MS.Trt_B |
| CLASP1    | 5.20E-04 | 0.27425 | 0.241 | 0.16 | 1 | HC_vs_MS.Trt_B |
| TTC37     | 5.20E-04 | 0.47695 | 0.372 | 0.27 | 1 | HC_vs_MS.Trt_B |
| ZNF12     | 5.22E-04 | 1.50487 | 0.329 | 0.24 | 1 | HC_vs_MS.Trt_B |
| CARHSP1   | 5.25E-04 | 0.68741 | 0.632 | 0.54 | 1 | HC_vs_MS.Trt_B |
| ZEB2      | 5.26E-04 | -0.7558 | 0.6   | 0.51 | 1 | HC_vs_MS.Trt_B |
| SOX5      | 5.27E-04 | 0.28371 | 0.174 | 0.1  | 1 | HC_vs_MS.Trt_B |
| SMAP1     | 5.27E-04 | 0.38905 | 0.18  | 0.11 | 1 | HC_vs_MS.Trt_B |
| KCTD21    | 5.28E-04 | -0.4194 | 0.416 | 0.32 | 1 | HC_vs_MS.Trt_B |
| PEX11A    | 5.29E-04 | -0.3751 | 0.552 | 0.45 | 1 | HC_vs_MS.Trt_B |
| AMBRA1    | 5.30E-04 | 0.7425  | 0.201 | 0.12 | 1 | HC_vs_MS.Trt_B |
| NEBL      | 5.31E-04 | 0.352   | 0.287 | 0.2  | 1 | HC_vs_MS.Trt_B |
| NMNAT1    | 5.33E-04 | 0.30854 | 0.977 | 0.94 | 1 | HC_vs_MS.Trt_B |
| VPS36     | 5.35E-04 | 0.32769 | 0.28  | 0.19 | 1 | HC_vs_MS.Trt_B |
| SHMT1     | 5.36E-04 | -0.3143 | 0.367 | 0.27 | 1 | HC_vs_MS.Trt_B |
| TGIF2     | 5.36E-04 | 0.67902 | 0.343 | 0.26 | 1 | HC_vs_MS.Trt_B |
| SRSF12    | 5.38E-04 | 0.41587 | 0.297 | 0.21 | 1 | HC_vs_MS.Trt_B |
| IL23R     | 5.40E-04 | 0.70066 | 0.343 | 0.25 | 1 | HC_vs_MS.Trt_B |
| ZNF627    | 5.40E-04 | -0.3144 | 0.568 | 0.45 | 1 | HC_vs_MS.Trt_B |
| TLR3      | 5.43E-04 | 0.31672 | 0.286 | 0.21 | 1 | HC_vs_MS.Trt_B |
| ERI2      | 5.47E-04 | 0.35991 | 0.148 | 0.08 | 1 | HC_vs_MS.Trt_B |
| MS4A2     | 5.49E-04 | 0.52006 | 0.555 | 0.49 | 1 | HC_vs_MS.Trt_B |
| RNF14     | 5.50E-04 | -0.6578 | 0.603 | 0.48 | 1 | HC_vs_MS.Trt_B |
| LMCD1     | 5.50E-04 | -0.2889 | 0.284 | 0.19 | 1 | HC_vs_MS.Trt_B |
| TRIOBP    | 5.57E-04 | -0.4756 | 0.397 | 0.29 | 1 | HC_vs_MS.Trt_B |
| COPS4     | 5.61E-04 | -0.2836 | 0.468 | 0.35 | 1 | HC_vs_MS.Trt_B |
| ZNF45     | 5.63E-04 | -1.0582 | 0.284 | 0.19 | 1 | HC_vs_MS.Trt_B |
| ATP2C1    | 5.66E-04 | 0.47934 | 0.152 | 0.09 | 1 | HC_vs_MS.Trt_B |
| PDCD7     | 5.66E-04 | 0.4689  | 0.438 | 0.34 | 1 | HC_vs_MS.Trt_B |
| PITPNM2   | 5.67E-04 | 0.30982 | 0.422 | 0.32 | 1 | HC_vs_MS.Trt_B |
| ARHGAP11A | 5.67E-04 | 0.53227 | 0.37  | 0.28 | 1 | HC_vs_MS.Trt_B |
| SNX29     | 5.69E-04 | 0.29574 | 0.77  | 0.73 | 1 | HC_vs_MS.Trt_B |
| BLOC1S2   | 5.70E-04 | -0.3522 | 0.522 | 0.42 | 1 | HC_vs_MS.Trt_B |
| VEZF1     | 5.75E-04 | 0.34626 | 0.201 | 0.12 | 1 | HC_vs_MS.Trt_B |
| ZNRF1     | 5.75E-04 | 0.61561 | 0.274 | 0.19 | 1 | HC_vs_MS.Trt_B |

|            |          |         |       |      |   |                |
|------------|----------|---------|-------|------|---|----------------|
| RP11-235E1 | 5.76E-04 | 0.44842 | 0.265 | 0.19 | 1 | HC_vs_MS.Trt_B |
| SHC1       | 5.86E-04 | 0.27599 | 0.63  | 0.55 | 1 | HC_vs_MS.Trt_B |
| SP140      | 5.89E-04 | 0.5377  | 0.212 | 0.13 | 1 | HC_vs_MS.Trt_B |
| C15orf61   | 5.93E-04 | -0.3288 | 0.58  | 0.45 | 1 | HC_vs_MS.Trt_B |
| POLR3D     | 5.99E-04 | 0.49256 | 0.4   | 0.3  | 1 | HC_vs_MS.Trt_B |
| ATP6V1A    | 6.00E-04 | 0.49226 | 0.472 | 0.38 | 1 | HC_vs_MS.Trt_B |
| ETV4       | 6.01E-04 | 0.47083 | 0.101 | 0.05 | 1 | HC_vs_MS.Trt_B |
| OSBPL2     | 6.04E-04 | -0.2915 | 0.475 | 0.38 | 1 | HC_vs_MS.Trt_B |
| TSC22D2    | 6.09E-04 | 0.44107 | 0.372 | 0.29 | 1 | HC_vs_MS.Trt_B |
| KIAA1468   | 6.15E-04 | -0.525  | 0.316 | 0.23 | 1 | HC_vs_MS.Trt_B |
| C2orf49    | 6.16E-04 | -0.4361 | 0.425 | 0.32 | 1 | HC_vs_MS.Trt_B |
| ZMYM1      | 6.18E-04 | 0.51984 | 0.549 | 0.45 | 1 | HC_vs_MS.Trt_B |
| TATDN3     | 6.19E-04 | 0.38567 | 0.775 | 0.7  | 1 | HC_vs_MS.Trt_B |
| TOP3A      | 6.24E-04 | 0.45316 | 0.817 | 0.73 | 1 | HC_vs_MS.Trt_B |
| RALGAPB    | 6.27E-04 | 0.54147 | 0.277 | 0.19 | 1 | HC_vs_MS.Trt_B |
| PYCR2      | 6.28E-04 | 0.31974 | 0.614 | 0.53 | 1 | HC_vs_MS.Trt_B |
| TTC39A     | 6.31E-04 | 0.30888 | 0.333 | 0.24 | 1 | HC_vs_MS.Trt_B |
| ZNF514     | 6.34E-04 | 0.36486 | 0.597 | 0.48 | 1 | HC_vs_MS.Trt_B |
| NUP58      | 6.34E-04 | 0.55805 | 0.332 | 0.24 | 1 | HC_vs_MS.Trt_B |
| APCDD1     | 6.41E-04 | 0.26238 | 0.372 | 0.29 | 1 | HC_vs_MS.Trt_B |
| 9-Mar      | 6.44E-04 | -0.3063 | 0.554 | 0.46 | 1 | HC_vs_MS.Trt_B |
| FANCL      | 6.48E-04 | 0.69465 | 0.12  | 0.06 | 1 | HC_vs_MS.Trt_B |
| HNRNPL     | 6.50E-04 | -0.3972 | 0.745 | 0.74 | 1 | HC_vs_MS.Trt_B |
| SERPINF1   | 6.51E-04 | 0.32022 | 0.752 | 0.65 | 1 | HC_vs_MS.Trt_B |
| TXNL4B     | 6.54E-04 | 0.49292 | 0.354 | 0.26 | 1 | HC_vs_MS.Trt_B |
| TTC14      | 6.56E-04 | -0.2809 | 0.399 | 0.29 | 1 | HC_vs_MS.Trt_B |
| SCARB2     | 6.56E-04 | 0.26318 | 0.3   | 0.21 | 1 | HC_vs_MS.Trt_B |
| DGKD       | 6.60E-04 | 0.5787  | 0.604 | 0.53 | 1 | HC_vs_MS.Trt_B |
| KIAA0586   | 6.62E-04 | -0.2662 | 0.796 | 0.71 | 1 | HC_vs_MS.Trt_B |
| ASZ1       | 6.67E-04 | 0.28695 | 0.454 | 0.36 | 1 | HC_vs_MS.Trt_B |
| TUBA1C     | 6.69E-04 | 0.34796 | 0.588 | 0.48 | 1 | HC_vs_MS.Trt_B |
| FBXO25     | 6.70E-04 | 0.41789 | 0.358 | 0.26 | 1 | HC_vs_MS.Trt_B |
| CES2       | 6.77E-04 | 0.32805 | 0.316 | 0.22 | 1 | HC_vs_MS.Trt_B |
| WAPL       | 6.83E-04 | 0.39876 | 0.452 | 0.36 | 1 | HC_vs_MS.Trt_B |
| ZNF880     | 6.86E-04 | -0.3769 | 0.47  | 0.37 | 1 | HC_vs_MS.Trt_B |
| TTC16      | 6.87E-04 | -0.5247 | 0.561 | 0.44 | 1 | HC_vs_MS.Trt_B |
| ZNF764     | 6.88E-04 | 0.68622 | 0.32  | 0.24 | 1 | HC_vs_MS.Trt_B |
| NOL12      | 6.93E-04 | -0.2928 | 0.483 | 0.37 | 1 | HC_vs_MS.Trt_B |
| MLANA      | 7.14E-04 | 0.25103 | 0.394 | 0.3  | 1 | HC_vs_MS.Trt_B |
| ZNF260     | 7.24E-04 | 0.42604 | 0.506 | 0.4  | 1 | HC_vs_MS.Trt_B |

|            |          |         |       |      |   |                |
|------------|----------|---------|-------|------|---|----------------|
| MORN4      | 7.25E-04 | 0.35741 | 0.532 | 0.43 | 1 | HC_vs_MS.Trt_B |
| RP11-449H3 | 7.26E-04 | 0.72122 | 0.255 | 0.17 | 1 | HC_vs_MS.Trt_B |
| FAM92A1    | 7.26E-04 | 0.5129  | 0.323 | 0.24 | 1 | HC_vs_MS.Trt_B |
| TMEM220    | 7.31E-04 | 0.396   | 0.532 | 0.45 | 1 | HC_vs_MS.Trt_B |
| SYT11      | 7.35E-04 | -0.5145 | 0.616 | 0.49 | 1 | HC_vs_MS.Trt_B |
| CEP164     | 7.40E-04 | 0.71578 | 0.157 | 0.09 | 1 | HC_vs_MS.Trt_B |
| ZSCAN10    | 7.44E-04 | 0.37945 | 0.352 | 0.26 | 1 | HC_vs_MS.Trt_B |
| KIAA1551   | 7.45E-04 | 0.2675  | 0.497 | 0.41 | 1 | HC_vs_MS.Trt_B |
| GMPPB      | 7.49E-04 | 0.89475 | 0.41  | 0.32 | 1 | HC_vs_MS.Trt_B |
| HMBOX1     | 7.53E-04 | 0.29013 | 0.497 | 0.39 | 1 | HC_vs_MS.Trt_B |
| METTL15    | 7.55E-04 | 0.71944 | 0.377 | 0.29 | 1 | HC_vs_MS.Trt_B |
| ARHGAP17   | 7.56E-04 | 0.33482 | 0.558 | 0.47 | 1 | HC_vs_MS.Trt_B |
| RNF157     | 7.67E-04 | -0.6233 | 0.607 | 0.5  | 1 | HC_vs_MS.Trt_B |
| SP3        | 7.67E-04 | 0.32801 | 0.559 | 0.44 | 1 | HC_vs_MS.Trt_B |
| SLC7A9     | 7.67E-04 | 0.34278 | 0.403 | 0.32 | 1 | HC_vs_MS.Trt_B |
| ALG1       | 7.69E-04 | -0.5102 | 0.613 | 0.49 | 1 | HC_vs_MS.Trt_B |
| LAX1       | 7.70E-04 | 0.47963 | 0.467 | 0.38 | 1 | HC_vs_MS.Trt_B |
| PON2       | 7.71E-04 | 1.03736 | 0.42  | 0.33 | 1 | HC_vs_MS.Trt_B |
| PUS7       | 7.73E-04 | 0.82188 | 0.333 | 0.24 | 1 | HC_vs_MS.Trt_B |
| GREB1      | 7.74E-04 | 0.27978 | 0.836 | 0.74 | 1 | HC_vs_MS.Trt_B |
| TP63       | 7.75E-04 | 0.36508 | 0.39  | 0.3  | 1 | HC_vs_MS.Trt_B |
| SLC25A26   | 7.76E-04 | -0.3343 | 0.625 | 0.54 | 1 | HC_vs_MS.Trt_B |
| MARK4      | 7.82E-04 | 0.29754 | 0.58  | 0.48 | 1 | HC_vs_MS.Trt_B |
| RASA4B     | 7.84E-04 | 0.38915 | 0.436 | 0.34 | 1 | HC_vs_MS.Trt_B |
| PRKCQ      | 7.85E-04 | 0.32127 | 0.354 | 0.26 | 1 | HC_vs_MS.Trt_B |
| MTHFD2     | 7.87E-04 | -0.4882 | 0.625 | 0.53 | 1 | HC_vs_MS.Trt_B |
| CBLB       | 7.87E-04 | 0.29697 | 0.355 | 0.26 | 1 | HC_vs_MS.Trt_B |
| SAXO2      | 7.90E-04 | -0.309  | 0.226 | 0.15 | 1 | HC_vs_MS.Trt_B |
| NMRAL1     | 7.91E-04 | -0.3852 | 0.496 | 0.37 | 1 | HC_vs_MS.Trt_B |
| NCOA4      | 7.92E-04 | 0.69193 | 0.204 | 0.13 | 1 | HC_vs_MS.Trt_B |
| GATA3      | 7.93E-04 | 0.42942 | 0.246 | 0.17 | 1 | HC_vs_MS.Trt_B |
| NPAP1      | 7.93E-04 | 0.27087 | 0.465 | 0.38 | 1 | HC_vs_MS.Trt_B |
| TTPAL      | 7.94E-04 | -0.2763 | 0.791 | 0.69 | 1 | HC_vs_MS.Trt_B |
| SLC25A19   | 7.95E-04 | 0.52291 | 0.397 | 0.31 | 1 | HC_vs_MS.Trt_B |
| ZBED1      | 7.96E-04 | 0.51185 | 0.477 | 0.38 | 1 | HC_vs_MS.Trt_B |
| PLD1       | 7.96E-04 | 0.74796 | 0.491 | 0.39 | 1 | HC_vs_MS.Trt_B |
| VPS52      | 8.03E-04 | 0.63208 | 0.159 | 0.09 | 1 | HC_vs_MS.Trt_B |
| HSBP1      | 8.06E-04 | -0.6348 | 0.599 | 0.5  | 1 | HC_vs_MS.Trt_B |
| IMPAD1     | 8.08E-04 | 0.4412  | 0.472 | 0.37 | 1 | HC_vs_MS.Trt_B |
| ZDHHC17    | 8.14E-04 | 0.31066 | 0.345 | 0.26 | 1 | HC_vs_MS.Trt_B |

|          |          |         |       |      |   |                |
|----------|----------|---------|-------|------|---|----------------|
| CLDN12   | 8.15E-04 | 0.28244 | 0.374 | 0.28 | 1 | HC_vs_MS.Trt_B |
| FLT4     | 8.19E-04 | 1.24513 | 0.104 | 0.05 | 1 | HC_vs_MS.Trt_B |
| FLCN     | 8.20E-04 | 0.59763 | 0.859 | 0.8  | 1 | HC_vs_MS.Trt_B |
| KSR1     | 8.23E-04 | 0.44195 | 0.286 | 0.2  | 1 | HC_vs_MS.Trt_B |
| SMCR8    | 8.25E-04 | -0.5418 | 0.294 | 0.2  | 1 | HC_vs_MS.Trt_B |
| ZNF528   | 8.27E-04 | 0.67688 | 0.574 | 0.47 | 1 | HC_vs_MS.Trt_B |
| ILKAP    | 8.30E-04 | -0.2574 | 0.588 | 0.46 | 1 | HC_vs_MS.Trt_B |
| ZNF687   | 8.35E-04 | 0.55409 | 0.593 | 0.5  | 1 | HC_vs_MS.Trt_B |
| SLC41A3  | 8.36E-04 | 0.40573 | 0.286 | 0.2  | 1 | HC_vs_MS.Trt_B |
| GALK1    | 8.39E-04 | 0.56634 | 0.297 | 0.22 | 1 | HC_vs_MS.Trt_B |
| NUDT19   | 8.44E-04 | -0.6489 | 0.87  | 0.77 | 1 | HC_vs_MS.Trt_B |
| DDX55    | 8.45E-04 | 0.49555 | 0.641 | 0.57 | 1 | HC_vs_MS.Trt_B |
| ZNF133   | 8.47E-04 | 0.86068 | 0.449 | 0.34 | 1 | HC_vs_MS.Trt_B |
| CCM2     | 8.53E-04 | 0.26321 | 0.649 | 0.56 | 1 | HC_vs_MS.Trt_B |
| ANKRD22  | 8.55E-04 | 0.40329 | 0.125 | 0.07 | 1 | HC_vs_MS.Trt_B |
| APOBEC3F | 8.56E-04 | -0.433  | 0.861 | 0.8  | 1 | HC_vs_MS.Trt_B |
| PLEKHG4  | 8.58E-04 | 0.6293  | 0.184 | 0.11 | 1 | HC_vs_MS.Trt_B |
| NLGN4Y   | 8.60E-04 | 0.38549 | 0.355 | 0.26 | 1 | HC_vs_MS.Trt_B |
| VHL      | 8.61E-04 | 0.33579 | 0.749 | 0.65 | 1 | HC_vs_MS.Trt_B |
| CARS2    | 8.62E-04 | 0.41537 | 0.758 | 0.65 | 1 | HC_vs_MS.Trt_B |
| ABLIM3   | 8.65E-04 | -0.6063 | 0.051 | 0.1  | 1 | HC_vs_MS.Trt_B |
| PARP4    | 8.66E-04 | 0.30783 | 0.271 | 0.19 | 1 | HC_vs_MS.Trt_B |
| HYAL1    | 8.66E-04 | 0.332   | 0.355 | 0.27 | 1 | HC_vs_MS.Trt_B |
| PAIP2B   | 8.72E-04 | 0.27476 | 0.225 | 0.15 | 1 | HC_vs_MS.Trt_B |
| WDR19    | 8.79E-04 | 0.33433 | 0.512 | 0.42 | 1 | HC_vs_MS.Trt_B |
| ACSS2    | 8.81E-04 | 1.5672  | 0.549 | 0.47 | 1 | HC_vs_MS.Trt_B |
| ATAD2B   | 8.83E-04 | 0.37739 | 0.628 | 0.55 | 1 | HC_vs_MS.Trt_B |
| SYT15    | 8.84E-04 | 0.41149 | 0.5   | 0.42 | 1 | HC_vs_MS.Trt_B |
| TMEM175  | 8.88E-04 | 0.41788 | 0.301 | 0.22 | 1 | HC_vs_MS.Trt_B |
| AREL1    | 8.88E-04 | 0.41919 | 0.446 | 0.35 | 1 | HC_vs_MS.Trt_B |
| SAMD15   | 8.89E-04 | 0.25339 | 0.323 | 0.23 | 1 | HC_vs_MS.Trt_B |
| TWSG1    | 8.90E-04 | 0.59031 | 0.371 | 0.28 | 1 | HC_vs_MS.Trt_B |
| IL5RA    | 9.04E-04 | 1.334   | 0.252 | 0.17 | 1 | HC_vs_MS.Trt_B |
| TTBK2    | 9.06E-04 | -0.8377 | 0.493 | 0.4  | 1 | HC_vs_MS.Trt_B |
| CCL5     | 9.10E-04 | -0.4579 | 0.89  | 0.8  | 1 | HC_vs_MS.Trt_B |
| HDAC9    | 9.19E-04 | 0.73053 | 0.459 | 0.37 | 1 | HC_vs_MS.Trt_B |
| IRF2     | 9.26E-04 | 0.39566 | 0.332 | 0.24 | 1 | HC_vs_MS.Trt_B |
| PRKCI    | 9.37E-04 | 0.49443 | 0.319 | 0.22 | 1 | HC_vs_MS.Trt_B |
| MBTPS1   | 9.38E-04 | 0.27057 | 0.517 | 0.41 | 1 | HC_vs_MS.Trt_B |
| NAPEPLD  | 9.40E-04 | 0.63839 | 0.32  | 0.23 | 1 | HC_vs_MS.Trt_B |

|          |          |         |       |      |   |                |
|----------|----------|---------|-------|------|---|----------------|
| AMMECR1L | 9.42E-04 | -0.2771 | 0.204 | 0.13 | 1 | HC_vs_MS.Trt_B |
| RNF214   | 9.43E-04 | 0.28318 | 0.223 | 0.15 | 1 | HC_vs_MS.Trt_B |
| TERB2    | 9.48E-04 | 0.25864 | 0.32  | 0.23 | 1 | HC_vs_MS.Trt_B |
| TAL1     | 9.49E-04 | 0.25949 | 0.212 | 0.14 | 1 | HC_vs_MS.Trt_B |
| WWC1     | 9.49E-04 | -0.2508 | 0.307 | 0.22 | 1 | HC_vs_MS.Trt_B |
| MESDC2   | 9.59E-04 | -0.2976 | 0.532 | 0.44 | 1 | HC_vs_MS.Trt_B |
| PABPC1L  | 9.62E-04 | 1.48962 | 0.284 | 0.2  | 1 | HC_vs_MS.Trt_B |
| ZNF398   | 9.63E-04 | 0.81796 | 0.148 | 0.08 | 1 | HC_vs_MS.Trt_B |
| RABL6    | 9.68E-04 | -0.3833 | 0.509 | 0.42 | 1 | HC_vs_MS.Trt_B |
| TBC1D8   | 9.68E-04 | 0.33621 | 0.425 | 0.31 | 1 | HC_vs_MS.Trt_B |
| CPT2     | 9.76E-04 | -0.5631 | 0.746 | 0.63 | 1 | HC_vs_MS.Trt_B |
| ZNF674   | 9.78E-04 | 0.25742 | 0.904 | 0.8  | 1 | HC_vs_MS.Trt_B |
| MAPK13   | 9.79E-04 | -0.295  | 0.638 | 0.53 | 1 | HC_vs_MS.Trt_B |
| CSMD2    | 9.94E-04 | 0.31943 | 0.345 | 0.26 | 1 | HC_vs_MS.Trt_B |
| ANO10    | 9.98E-04 | 0.36193 | 0.568 | 0.45 | 1 | HC_vs_MS.Trt_B |
| ACLY     | 0.001    | 0.4802  | 0.181 | 0.11 | 1 | HC_vs_MS.Trt_B |
| MTG2     | 0.00101  | 0.44395 | 0.775 | 0.71 | 1 | HC_vs_MS.Trt_B |
| KLHL5    | 0.00101  | -0.2648 | 0.419 | 0.33 | 1 | HC_vs_MS.Trt_B |
| ICMT     | 0.00101  | -0.3059 | 0.609 | 0.53 | 1 | HC_vs_MS.Trt_B |
| FAM161B  | 0.00102  | -0.3906 | 0.348 | 0.26 | 1 | HC_vs_MS.Trt_B |
| HECW2    | 0.00102  | 0.40079 | 0.403 | 0.32 | 1 | HC_vs_MS.Trt_B |
| ZNF551   | 0.00102  | 1.18384 | 0.513 | 0.4  | 1 | HC_vs_MS.Trt_B |
| SLX4IP   | 0.00103  | -0.495  | 0.471 | 0.38 | 1 | HC_vs_MS.Trt_B |
| MRS2     | 0.00103  | 0.41073 | 0.764 | 0.71 | 1 | HC_vs_MS.Trt_B |
| RFX2     | 0.00104  | 0.53304 | 0.477 | 0.4  | 1 | HC_vs_MS.Trt_B |
| EXOSC7   | 0.00104  | -0.423  | 0.446 | 0.35 | 1 | HC_vs_MS.Trt_B |
| HDAC3    | 0.00105  | 0.98717 | 0.117 | 0.06 | 1 | HC_vs_MS.Trt_B |
| CAPN15   | 0.00105  | 0.5617  | 0.207 | 0.13 | 1 | HC_vs_MS.Trt_B |
| PPP2R2D  | 0.00106  | -1.1857 | 0.622 | 0.53 | 1 | HC_vs_MS.Trt_B |
| ZNF540   | 0.00106  | -1.1032 | 0.428 | 0.34 | 1 | HC_vs_MS.Trt_B |
| C1orf127 | 0.00106  | 0.4099  | 0.272 | 0.2  | 1 | HC_vs_MS.Trt_B |
| PSMD4    | 0.00107  | -0.4244 | 0.642 | 0.54 | 1 | HC_vs_MS.Trt_B |
| NDUFC2   | 0.00107  | -0.3351 | 0.562 | 0.46 | 1 | HC_vs_MS.Trt_B |
| QKI      | 0.00107  | 0.58757 | 0.386 | 0.29 | 1 | HC_vs_MS.Trt_B |
| CDC27    | 0.00108  | -0.2935 | 0.438 | 0.34 | 1 | HC_vs_MS.Trt_B |
| IVD      | 0.00108  | 0.48617 | 0.9   | 0.85 | 1 | HC_vs_MS.Trt_B |
| NADK     | 0.00109  | 0.27197 | 0.287 | 0.2  | 1 | HC_vs_MS.Trt_B |
| CCDC159  | 0.00109  | -0.4389 | 0.765 | 0.68 | 1 | HC_vs_MS.Trt_B |
| GBP3     | 0.00109  | 0.64012 | 0.194 | 0.12 | 1 | HC_vs_MS.Trt_B |
| PSPC1    | 0.00109  | 0.30933 | 0.309 | 0.22 | 1 | HC_vs_MS.Trt_B |

|          |         |         |       |      |   |                |
|----------|---------|---------|-------|------|---|----------------|
| TVP23A   | 0.0011  | 0.47435 | 0.454 | 0.36 | 1 | HC_vs_MS.Trt_B |
| SUV39H2  | 0.0011  | 0.53359 | 0.407 | 0.31 | 1 | HC_vs_MS.Trt_B |
| IQCE     | 0.0011  | 0.54222 | 0.406 | 0.29 | 1 | HC_vs_MS.Trt_B |
| TMEM108  | 0.0011  | 0.83244 | 0.332 | 0.24 | 1 | HC_vs_MS.Trt_B |
| GALNT6   | 0.00111 | 0.2533  | 0.655 | 0.56 | 1 | HC_vs_MS.Trt_B |
| B3GALNT2 | 0.00111 | -0.4425 | 0.619 | 0.53 | 1 | HC_vs_MS.Trt_B |
| ANKDD1A  | 0.00112 | -0.2784 | 0.522 | 0.43 | 1 | HC_vs_MS.Trt_B |
| SMG5     | 0.00112 | 0.42934 | 0.149 | 0.09 | 1 | HC_vs_MS.Trt_B |
| PCCA     | 0.00112 | 0.32541 | 0.568 | 0.47 | 1 | HC_vs_MS.Trt_B |
| PTPN9    | 0.00113 | 0.75696 | 0.32  | 0.23 | 1 | HC_vs_MS.Trt_B |
| WWP1     | 0.00113 | -0.3665 | 0.432 | 0.32 | 1 | HC_vs_MS.Trt_B |
| ZNF564   | 0.00114 | -0.5681 | 0.629 | 0.52 | 1 | HC_vs_MS.Trt_B |
| TECPR2   | 0.00115 | 0.43107 | 0.345 | 0.25 | 1 | HC_vs_MS.Trt_B |
| TBC1D9B  | 0.00115 | 0.48031 | 0.457 | 0.35 | 1 | HC_vs_MS.Trt_B |
| LAPTM4B  | 0.00116 | -1.0218 | 0.194 | 0.12 | 1 | HC_vs_MS.Trt_B |
| VPS4B    | 0.00116 | -0.4566 | 0.742 | 0.62 | 1 | HC_vs_MS.Trt_B |
| CA14     | 0.00116 | 0.26933 | 0.572 | 0.46 | 1 | HC_vs_MS.Trt_B |
| AP3M1    | 0.00118 | 0.76092 | 0.484 | 0.41 | 1 | HC_vs_MS.Trt_B |
| LAMTOR3  | 0.00118 | -0.4321 | 0.325 | 0.23 | 1 | HC_vs_MS.Trt_B |
| CDH26    | 0.00119 | 0.72459 | 0.159 | 0.1  | 1 | HC_vs_MS.Trt_B |
| NOP14    | 0.00119 | 0.5336  | 0.413 | 0.31 | 1 | HC_vs_MS.Trt_B |
| DNAJB12  | 0.0012  | 0.76403 | 0.12  | 0.06 | 1 | HC_vs_MS.Trt_B |
| HIKESHI  | 0.0012  | -0.4608 | 0.43  | 0.31 | 1 | HC_vs_MS.Trt_B |
| ST7L     | 0.00121 | 0.26498 | 0.468 | 0.38 | 1 | HC_vs_MS.Trt_B |
| TTC21B   | 0.00121 | 0.97393 | 0.359 | 0.26 | 1 | HC_vs_MS.Trt_B |
| FBXO9    | 0.00122 | -0.485  | 0.752 | 0.67 | 1 | HC_vs_MS.Trt_B |
| KDM4C    | 0.00123 | 0.35787 | 0.291 | 0.21 | 1 | HC_vs_MS.Trt_B |
| TBC1D32  | 0.00123 | -0.356  | 0.449 | 0.35 | 1 | HC_vs_MS.Trt_B |
| NFKB2    | 0.00123 | 0.3782  | 0.341 | 0.26 | 1 | HC_vs_MS.Trt_B |
| RHNO1    | 0.00123 | 0.42164 | 0.613 | 0.54 | 1 | HC_vs_MS.Trt_B |
| MTHFD1L  | 0.00125 | -0.6757 | 0.125 | 0.07 | 1 | HC_vs_MS.Trt_B |
| HJURP    | 0.00125 | 0.35976 | 0.37  | 0.28 | 1 | HC_vs_MS.Trt_B |
| DNHD1    | 0.00125 | 0.93434 | 0.316 | 0.24 | 1 | HC_vs_MS.Trt_B |
| UFM1     | 0.00126 | 0.34994 | 0.326 | 0.24 | 1 | HC_vs_MS.Trt_B |
| FKBP9    | 0.00127 | -0.866  | 0.445 | 0.34 | 1 | HC_vs_MS.Trt_B |
| DZIP3    | 0.00128 | -0.6008 | 0.257 | 0.17 | 1 | HC_vs_MS.Trt_B |
| CDK6     | 0.00128 | 0.61206 | 0.145 | 0.08 | 1 | HC_vs_MS.Trt_B |
| ZBP1     | 0.00129 | 0.32073 | 0.567 | 0.46 | 1 | HC_vs_MS.Trt_B |
| F2R      | 0.00129 | -0.5523 | 0.525 | 0.44 | 1 | HC_vs_MS.Trt_B |
| IMMT     | 0.0013  | -0.7424 | 0.443 | 0.34 | 1 | HC_vs_MS.Trt_B |

|          |         |         |       |      |   |                |
|----------|---------|---------|-------|------|---|----------------|
| SNX30    | 0.0013  | -0.4755 | 0.435 | 0.34 | 1 | HC_vs_MS.Trt_B |
| SGSM2    | 0.00132 | 0.33114 | 0.264 | 0.19 | 1 | HC_vs_MS.Trt_B |
| PLA2G12A | 0.00133 | -0.5171 | 0.57  | 0.47 | 1 | HC_vs_MS.Trt_B |
| IER2     | 0.00134 | 0.25535 | 0.309 | 0.23 | 1 | HC_vs_MS.Trt_B |
| CHTF8    | 0.00135 | 0.25075 | 0.217 | 0.14 | 1 | HC_vs_MS.Trt_B |
| ALDH6A1  | 0.00135 | -0.5937 | 0.796 | 0.73 | 1 | HC_vs_MS.Trt_B |
| AMZ2     | 0.00137 | -0.3488 | 0.523 | 0.41 | 1 | HC_vs_MS.Trt_B |
| LGR6     | 0.00139 | 0.26243 | 0.178 | 0.11 | 1 | HC_vs_MS.Trt_B |
| USP14    | 0.0014  | 0.41862 | 0.575 | 0.47 | 1 | HC_vs_MS.Trt_B |
| CRCP     | 0.0014  | -0.2702 | 0.862 | 0.76 | 1 | HC_vs_MS.Trt_B |
| PSMC1    | 0.00141 | -0.518  | 0.42  | 0.32 | 1 | HC_vs_MS.Trt_B |
| PARP10   | 0.00141 | 0.37694 | 0.157 | 0.09 | 1 | HC_vs_MS.Trt_B |
| FAT1     | 0.00141 | 0.3202  | 0.284 | 0.2  | 1 | HC_vs_MS.Trt_B |
| L3MBTL3  | 0.00141 | 1.02035 | 0.164 | 0.1  | 1 | HC_vs_MS.Trt_B |
| ALDH1L2  | 0.00142 | 0.45591 | 0.232 | 0.16 | 1 | HC_vs_MS.Trt_B |
| ARV1     | 0.00142 | -1.0771 | 0.232 | 0.16 | 1 | HC_vs_MS.Trt_B |
| ERI1     | 0.00143 | 0.25549 | 0.365 | 0.27 | 1 | HC_vs_MS.Trt_B |
| TJAP1    | 0.00143 | -0.7964 | 0.346 | 0.25 | 1 | HC_vs_MS.Trt_B |
| MED22    | 0.00144 | 0.29629 | 0.506 | 0.42 | 1 | HC_vs_MS.Trt_B |
| MAF1     | 0.00144 | 0.35236 | 0.193 | 0.12 | 1 | HC_vs_MS.Trt_B |
| ARRB2    | 0.00146 | 0.27661 | 0.771 | 0.66 | 1 | HC_vs_MS.Trt_B |
| DDX51    | 0.00147 | 0.6337  | 0.645 | 0.55 | 1 | HC_vs_MS.Trt_B |
| RABGEF1  | 0.00147 | 0.6689  | 0.297 | 0.21 | 1 | HC_vs_MS.Trt_B |
| FAM156A  | 0.00148 | 0.42771 | 0.165 | 0.1  | 1 | HC_vs_MS.Trt_B |
| KLHL2    | 0.00148 | 0.3868  | 0.323 | 0.24 | 1 | HC_vs_MS.Trt_B |
| FAM149A  | 0.00148 | 0.36446 | 0.306 | 0.22 | 1 | HC_vs_MS.Trt_B |
| SRRM1    | 0.00149 | -0.4148 | 0.868 | 0.75 | 1 | HC_vs_MS.Trt_B |
| CBWD2    | 0.00149 | 0.42695 | 0.414 | 0.33 | 1 | HC_vs_MS.Trt_B |
| VRTN     | 0.0015  | -0.5578 | 0.155 | 0.09 | 1 | HC_vs_MS.Trt_B |
| XPR1     | 0.0015  | 0.2951  | 0.299 | 0.21 | 1 | HC_vs_MS.Trt_B |
| ATG14    | 0.00151 | 0.3479  | 0.654 | 0.57 | 1 | HC_vs_MS.Trt_B |
| SEC23IP  | 0.00151 | -0.4018 | 0.412 | 0.32 | 1 | HC_vs_MS.Trt_B |
| PRR4     | 0.00152 | 0.28561 | 0.216 | 0.14 | 1 | HC_vs_MS.Trt_B |
| ARHGEF38 | 0.00152 | 0.31449 | 0.361 | 0.28 | 1 | HC_vs_MS.Trt_B |
| PRODH    | 0.00153 | 0.74921 | 0.386 | 0.29 | 1 | HC_vs_MS.Trt_B |
| SLC39A3  | 0.00153 | -0.2713 | 0.581 | 0.5  | 1 | HC_vs_MS.Trt_B |
| PPM1B    | 0.00154 | 0.47409 | 0.388 | 0.3  | 1 | HC_vs_MS.Trt_B |
| CDH8     | 0.00154 | 0.28669 | 0.477 | 0.39 | 1 | HC_vs_MS.Trt_B |
| SGPP2    | 0.00154 | -0.358  | 0.332 | 0.25 | 1 | HC_vs_MS.Trt_B |
| CLCN6    | 0.00154 | 0.90261 | 0.496 | 0.41 | 1 | HC_vs_MS.Trt_B |

|          |         |         |       |      |   |                |
|----------|---------|---------|-------|------|---|----------------|
| ARRDC3   | 0.00154 | -0.6504 | 0.464 | 0.54 | 1 | HC_vs_MS.Trt_B |
| NBEAL2   | 0.00155 | 0.62762 | 0.206 | 0.14 | 1 | HC_vs_MS.Trt_B |
| NKD1     | 0.00156 | 0.50372 | 0.394 | 0.29 | 1 | HC_vs_MS.Trt_B |
| TROAP    | 0.00156 | 0.25834 | 0.438 | 0.34 | 1 | HC_vs_MS.Trt_B |
| ACAN     | 0.00157 | 0.97556 | 0.268 | 0.19 | 1 | HC_vs_MS.Trt_B |
| KDM6B    | 0.00159 | 0.7127  | 0.161 | 0.1  | 1 | HC_vs_MS.Trt_B |
| GPCPD1   | 0.00159 | -0.2705 | 0.293 | 0.2  | 1 | HC_vs_MS.Trt_B |
| TRAF3IP1 | 0.00159 | 0.47256 | 0.371 | 0.29 | 1 | HC_vs_MS.Trt_B |
| DCBLD1   | 0.00159 | -0.3847 | 0.504 | 0.41 | 1 | HC_vs_MS.Trt_B |
| POLH     | 0.00159 | -0.6554 | 0.541 | 0.44 | 1 | HC_vs_MS.Trt_B |
| FAM3A    | 0.00159 | 0.27452 | 0.752 | 0.64 | 1 | HC_vs_MS.Trt_B |
| CCNC     | 0.00159 | -0.3952 | 0.604 | 0.49 | 1 | HC_vs_MS.Trt_B |
| SPATA7   | 0.0016  | 0.27926 | 0.313 | 0.23 | 1 | HC_vs_MS.Trt_B |
| PRKRIP1  | 0.00161 | 0.88926 | 0.13  | 0.07 | 1 | HC_vs_MS.Trt_B |
| BRCA2    | 0.00161 | -0.6447 | 0.358 | 0.27 | 1 | HC_vs_MS.Trt_B |
| TUBA1B   | 0.00162 | 0.31946 | 0.284 | 0.2  | 1 | HC_vs_MS.Trt_B |
| RABGAP1  | 0.00164 | 0.75757 | 0.381 | 0.29 | 1 | HC_vs_MS.Trt_B |
| ZNF677   | 0.00164 | 0.62395 | 0.794 | 0.74 | 1 | HC_vs_MS.Trt_B |
| ZNF69    | 0.00164 | 0.25272 | 0.452 | 0.37 | 1 | HC_vs_MS.Trt_B |
| MUM1     | 0.00165 | 0.32429 | 0.599 | 0.48 | 1 | HC_vs_MS.Trt_B |
| PHF20    | 0.00166 | -0.3827 | 0.478 | 0.38 | 1 | HC_vs_MS.Trt_B |
| XPO6     | 0.00166 | 0.48384 | 0.312 | 0.23 | 1 | HC_vs_MS.Trt_B |
| MED4     | 0.00166 | -0.4123 | 0.646 | 0.56 | 1 | HC_vs_MS.Trt_B |
| COMMD9   | 0.00166 | 0.26397 | 0.446 | 0.36 | 1 | HC_vs_MS.Trt_B |
| MTR      | 0.00167 | 0.28098 | 0.478 | 0.41 | 1 | HC_vs_MS.Trt_B |
| FKBP8    | 0.00167 | 1.11191 | 0.196 | 0.13 | 1 | HC_vs_MS.Trt_B |
| TRIM2    | 0.00171 | 0.66869 | 0.23  | 0.16 | 1 | HC_vs_MS.Trt_B |
| UPF3A    | 0.00171 | -0.3754 | 0.712 | 0.62 | 1 | HC_vs_MS.Trt_B |
| MAN1B1   | 0.00171 | 0.40338 | 0.354 | 0.26 | 1 | HC_vs_MS.Trt_B |
| BACH2    | 0.00173 | 0.53437 | 0.242 | 0.17 | 1 | HC_vs_MS.Trt_B |
| F2RL1    | 0.00173 | 1.13994 | 0.191 | 0.12 | 1 | HC_vs_MS.Trt_B |
| BRD8     | 0.00174 | -0.4562 | 0.735 | 0.65 | 1 | HC_vs_MS.Trt_B |
| TFAM     | 0.00174 | 0.38894 | 0.312 | 0.24 | 1 | HC_vs_MS.Trt_B |
| RALGDS   | 0.00175 | 0.25416 | 0.345 | 0.26 | 1 | HC_vs_MS.Trt_B |
| CITED2   | 0.00175 | 0.83945 | 0.139 | 0.08 | 1 | HC_vs_MS.Trt_B |
| FAM118A  | 0.00177 | 0.64738 | 0.52  | 0.45 | 1 | HC_vs_MS.Trt_B |
| SCAMP3   | 0.00177 | 0.40872 | 0.209 | 0.14 | 1 | HC_vs_MS.Trt_B |
| CD3E     | 0.00178 | 0.307   | 0.683 | 0.62 | 1 | HC_vs_MS.Trt_B |
| FHOD1    | 0.00178 | 0.58013 | 0.135 | 0.08 | 1 | HC_vs_MS.Trt_B |
| RHPN2    | 0.00178 | 0.35099 | 0.548 | 0.48 | 1 | HC_vs_MS.Trt_B |



|            |         |         |       |      |   |                |
|------------|---------|---------|-------|------|---|----------------|
| ALDH1B1    | 0.00179 | 0.30726 | 0.591 | 0.5  | 1 | HC_vs_MS.Trt_B |
| RP11-80H18 | 0.00179 | 0.72194 | 0.267 | 0.19 | 1 | HC_vs_MS.Trt_B |
| EPS8       | 0.0018  | 0.30916 | 0.391 | 0.3  | 1 | HC_vs_MS.Trt_B |
| IFI44L     | 0.00183 | 1.36453 | 0.2   | 0.13 | 1 | HC_vs_MS.Trt_B |
| SLX4       | 0.00184 | -0.4715 | 0.443 | 0.36 | 1 | HC_vs_MS.Trt_B |
| TEX35      | 0.00185 | 0.26485 | 0.312 | 0.24 | 1 | HC_vs_MS.Trt_B |
| GMPPA      | 0.00188 | -0.3477 | 0.236 | 0.16 | 1 | HC_vs_MS.Trt_B |
| SMIM10L1   | 0.00192 | 0.76822 | 0.165 | 0.1  | 1 | HC_vs_MS.Trt_B |
| MIS18BP1   | 0.00194 | -0.4179 | 0.586 | 0.48 | 1 | HC_vs_MS.Trt_B |
| SLC23A3    | 0.00194 | 0.34227 | 0.41  | 0.31 | 1 | HC_vs_MS.Trt_B |
| MYO9A      | 0.00194 | 0.58953 | 0.323 | 0.24 | 1 | HC_vs_MS.Trt_B |
| CENPC      | 0.00194 | -0.3342 | 0.567 | 0.47 | 1 | HC_vs_MS.Trt_B |
| B4GALT5    | 0.00195 | 0.98765 | 0.251 | 0.18 | 1 | HC_vs_MS.Trt_B |
| ZNHIT6     | 0.00195 | 0.92236 | 0.393 | 0.29 | 1 | HC_vs_MS.Trt_B |
| CNTROB     | 0.00195 | 0.78784 | 0.177 | 0.11 | 1 | HC_vs_MS.Trt_B |
| DPYSL5     | 0.00196 | 0.30664 | 0.591 | 0.53 | 1 | HC_vs_MS.Trt_B |
| OBFC1      | 0.00197 | 0.28845 | 0.255 | 0.18 | 1 | HC_vs_MS.Trt_B |
| NSD1       | 0.00197 | 0.28676 | 0.645 | 0.55 | 1 | HC_vs_MS.Trt_B |
| HPSE       | 0.00198 | -0.5112 | 0.617 | 0.53 | 1 | HC_vs_MS.Trt_B |
| PAK3       | 0.00198 | 0.29144 | 0.384 | 0.3  | 1 | HC_vs_MS.Trt_B |
| KAT8       | 0.00199 | 0.59823 | 0.145 | 0.09 | 1 | HC_vs_MS.Trt_B |
| PBX2       | 0.00199 | 0.77981 | 0.12  | 0.07 | 1 | HC_vs_MS.Trt_B |
| PCTP       | 0.00199 | -0.7087 | 0.391 | 0.31 | 1 | HC_vs_MS.Trt_B |
| RPS19BP1   | 0.002   | -0.2698 | 0.433 | 0.34 | 1 | HC_vs_MS.Trt_B |
| ERVK3-1    | 0.002   | 0.41059 | 0.274 | 0.2  | 1 | HC_vs_MS.Trt_B |
| ZNF280D    | 0.002   | 0.85613 | 0.214 | 0.15 | 1 | HC_vs_MS.Trt_B |
| PWWP2A     | 0.002   | 0.30505 | 0.165 | 0.1  | 1 | HC_vs_MS.Trt_B |
| SFN        | 0.00201 | 0.28979 | 0.271 | 0.2  | 1 | HC_vs_MS.Trt_B |
| LBHD1      | 0.00201 | 1.0368  | 0.477 | 0.38 | 1 | HC_vs_MS.Trt_B |
| SFXN3      | 0.00201 | 0.7302  | 0.323 | 0.24 | 1 | HC_vs_MS.Trt_B |
| SLU7       | 0.00201 | -0.4932 | 0.368 | 0.27 | 1 | HC_vs_MS.Trt_B |
| MAGIX      | 0.00202 | 0.67869 | 0.465 | 0.39 | 1 | HC_vs_MS.Trt_B |
| ELOVL7     | 0.00203 | 0.34896 | 0.319 | 0.24 | 1 | HC_vs_MS.Trt_B |
| CDNF       | 0.00205 | -1.38   | 0.184 | 0.12 | 1 | HC_vs_MS.Trt_B |
| TRIM68     | 0.00205 | -0.5048 | 0.509 | 0.41 | 1 | HC_vs_MS.Trt_B |
| GPRC5A     | 0.00205 | 0.31556 | 0.613 | 0.51 | 1 | HC_vs_MS.Trt_B |
| ZNF682     | 0.00205 | 0.51004 | 0.37  | 0.28 | 1 | HC_vs_MS.Trt_B |
| C2orf69    | 0.00205 | 0.29673 | 0.239 | 0.16 | 1 | HC_vs_MS.Trt_B |
| LRCH4      | 0.00206 | 0.63727 | 0.5   | 0.42 | 1 | HC_vs_MS.Trt_B |
| ATAD1      | 0.00206 | 0.25883 | 0.143 | 0.08 | 1 | HC_vs_MS.Trt_B |

|            |         |         |       |      |   |                |
|------------|---------|---------|-------|------|---|----------------|
| ACVR2B     | 0.00208 | 0.97107 | 0.383 | 0.3  | 1 | HC_vs_MS.Trt_B |
| TAF1A      | 0.00209 | 0.87368 | 0.394 | 0.31 | 1 | HC_vs_MS.Trt_B |
| GCAT       | 0.00209 | -0.6142 | 0.223 | 0.15 | 1 | HC_vs_MS.Trt_B |
| ADAP2      | 0.0021  | -0.3944 | 0.172 | 0.11 | 1 | HC_vs_MS.Trt_B |
| AMDHD1     | 0.00211 | 0.97733 | 0.196 | 0.13 | 1 | HC_vs_MS.Trt_B |
| MORC3      | 0.00211 | -0.2649 | 0.486 | 0.4  | 1 | HC_vs_MS.Trt_B |
| BUB3       | 0.00213 | -0.344  | 0.616 | 0.5  | 1 | HC_vs_MS.Trt_B |
| PBXIP1     | 0.00215 | 0.28479 | 0.539 | 0.47 | 1 | HC_vs_MS.Trt_B |
| RPUSD3     | 0.00215 | -0.4062 | 0.777 | 0.7  | 1 | HC_vs_MS.Trt_B |
| KALRN      | 0.00215 | 0.85797 | 0.3   | 0.22 | 1 | HC_vs_MS.Trt_B |
| FBL        | 0.00217 | 0.33696 | 0.426 | 0.34 | 1 | HC_vs_MS.Trt_B |
| SERPINH1   | 0.00218 | 1.23505 | 0.304 | 0.22 | 1 | HC_vs_MS.Trt_B |
| ZNF439     | 0.00218 | -0.8879 | 0.616 | 0.55 | 1 | HC_vs_MS.Trt_B |
| ZNF644     | 0.00218 | 0.55202 | 0.194 | 0.13 | 1 | HC_vs_MS.Trt_B |
| GPRIN3     | 0.00219 | 0.31016 | 0.428 | 0.35 | 1 | HC_vs_MS.Trt_B |
| NOC2L      | 0.0022  | -0.3481 | 0.716 | 0.63 | 1 | HC_vs_MS.Trt_B |
| 8-Mar      | 0.0022  | -0.4592 | 0.387 | 0.29 | 1 | HC_vs_MS.Trt_B |
| CCNYL1     | 0.0022  | 0.55276 | 0.359 | 0.27 | 1 | HC_vs_MS.Trt_B |
| IL6ST      | 0.0022  | 0.45563 | 0.367 | 0.29 | 1 | HC_vs_MS.Trt_B |
| RSAD2      | 0.00221 | 0.88421 | 0.326 | 0.25 | 1 | HC_vs_MS.Trt_B |
| SLIT1      | 0.00221 | 0.32874 | 0.236 | 0.17 | 1 | HC_vs_MS.Trt_B |
| GSTM3      | 0.00222 | 0.62746 | 0.506 | 0.39 | 1 | HC_vs_MS.Trt_B |
| DBR1       | 0.00222 | -0.2793 | 0.749 | 0.65 | 1 | HC_vs_MS.Trt_B |
| XPO1       | 0.00223 | -0.2815 | 0.916 | 0.87 | 1 | HC_vs_MS.Trt_B |
| HIST1H2BG  | 0.00223 | 0.87354 | 0.472 | 0.4  | 1 | HC_vs_MS.Trt_B |
| LRPAP1     | 0.00225 | -0.4312 | 0.868 | 0.77 | 1 | HC_vs_MS.Trt_B |
| ITPK1      | 0.00225 | -0.255  | 0.555 | 0.46 | 1 | HC_vs_MS.Trt_B |
| C5         | 0.00226 | 0.68754 | 0.4   | 0.32 | 1 | HC_vs_MS.Trt_B |
| URM1       | 0.00226 | 0.83569 | 0.138 | 0.08 | 1 | HC_vs_MS.Trt_B |
| VASH2      | 0.00227 | 0.27735 | 0.745 | 0.64 | 1 | HC_vs_MS.Trt_B |
| ZNF280C    | 0.00227 | 0.64889 | 0.252 | 0.18 | 1 | HC_vs_MS.Trt_B |
| KCTD20     | 0.00227 | 0.27234 | 0.616 | 0.57 | 1 | HC_vs_MS.Trt_B |
| COL6A3     | 0.00228 | 0.76433 | 0.452 | 0.36 | 1 | HC_vs_MS.Trt_B |
| AC004381.6 | 0.00228 | 0.45687 | 0.196 | 0.12 | 1 | HC_vs_MS.Trt_B |
| ZNF485     | 0.00229 | 0.28878 | 0.186 | 0.12 | 1 | HC_vs_MS.Trt_B |
| ZKSCAN7    | 0.00229 | 0.2776  | 0.599 | 0.52 | 1 | HC_vs_MS.Trt_B |
| RAB37      | 0.0023  | 0.30473 | 0.38  | 0.3  | 1 | HC_vs_MS.Trt_B |
| C3orf70    | 0.0023  | 0.2549  | 0.699 | 0.66 | 1 | HC_vs_MS.Trt_B |
| SSB        | 0.0023  | -0.3918 | 0.749 | 0.64 | 1 | HC_vs_MS.Trt_B |
| ZNF75A     | 0.00231 | -0.5091 | 0.72  | 0.61 | 1 | HC_vs_MS.Trt_B |

|            |         |         |       |      |   |                |
|------------|---------|---------|-------|------|---|----------------|
| PCED1A     | 0.00231 | 0.37781 | 0.136 | 0.08 | 1 | HC_vs_MS.Trt_B |
| ANTXR1     | 0.00232 | 0.32957 | 0.204 | 0.13 | 1 | HC_vs_MS.Trt_B |
| C11orf24   | 0.00233 | 1.13074 | 0.246 | 0.17 | 1 | HC_vs_MS.Trt_B |
| YIF1B      | 0.00235 | -0.4494 | 0.583 | 0.5  | 1 | HC_vs_MS.Trt_B |
| GPR35      | 0.00235 | 0.566   | 0.28  | 0.2  | 1 | HC_vs_MS.Trt_B |
| VNN3       | 0.00235 | -0.2818 | 0.358 | 0.26 | 1 | HC_vs_MS.Trt_B |
| ZFAND4     | 0.00235 | 0.81749 | 0.396 | 0.3  | 1 | HC_vs_MS.Trt_B |
| GCLC       | 0.00237 | 0.42241 | 0.497 | 0.41 | 1 | HC_vs_MS.Trt_B |
| CHSY1      | 0.00238 | 0.70207 | 0.257 | 0.18 | 1 | HC_vs_MS.Trt_B |
| ZNF763     | 0.00239 | 1.1379  | 0.172 | 0.11 | 1 | HC_vs_MS.Trt_B |
| SLC16A12   | 0.0024  | 0.28067 | 0.397 | 0.32 | 1 | HC_vs_MS.Trt_B |
| GPC2       | 0.00241 | 0.42568 | 0.397 | 0.33 | 1 | HC_vs_MS.Trt_B |
| SKA2       | 0.00242 | -0.4002 | 0.551 | 0.44 | 1 | HC_vs_MS.Trt_B |
| UTP23      | 0.00242 | 0.29414 | 0.499 | 0.42 | 1 | HC_vs_MS.Trt_B |
| VAC14      | 0.00242 | 0.5857  | 0.104 | 0.05 | 1 | HC_vs_MS.Trt_B |
| PYCR1      | 0.00243 | -0.8431 | 0.406 | 0.31 | 1 | HC_vs_MS.Trt_B |
| D2HGDH     | 0.00243 | 0.66791 | 0.439 | 0.35 | 1 | HC_vs_MS.Trt_B |
| LA16c-431H | 0.00245 | 0.35351 | 0.493 | 0.42 | 1 | HC_vs_MS.Trt_B |
| ACY1       | 0.00246 | -0.5041 | 0.58  | 0.47 | 1 | HC_vs_MS.Trt_B |
| RNF215     | 0.00247 | 0.4184  | 0.432 | 0.34 | 1 | HC_vs_MS.Trt_B |
| NPTN       | 0.00249 | 0.432   | 0.248 | 0.17 | 1 | HC_vs_MS.Trt_B |
| ABHD2      | 0.0025  | -0.3182 | 0.622 | 0.52 | 1 | HC_vs_MS.Trt_B |
| ENTPD3     | 0.0025  | 0.27744 | 0.33  | 0.24 | 1 | HC_vs_MS.Trt_B |
| GPR137     | 0.00251 | 0.63888 | 0.207 | 0.14 | 1 | HC_vs_MS.Trt_B |
| RAD23B     | 0.00251 | -0.3067 | 0.439 | 0.34 | 1 | HC_vs_MS.Trt_B |
| CHST14     | 0.00251 | 1.17577 | 0.225 | 0.16 | 1 | HC_vs_MS.Trt_B |
| TLK1       | 0.00253 | -0.2632 | 0.729 | 0.63 | 1 | HC_vs_MS.Trt_B |
| KLHL32     | 0.00255 | 0.78087 | 0.101 | 0.05 | 1 | HC_vs_MS.Trt_B |
| CA12       | 0.00255 | 0.67369 | 0.265 | 0.19 | 1 | HC_vs_MS.Trt_B |
| STARD4     | 0.00256 | 1.24726 | 0.143 | 0.09 | 1 | HC_vs_MS.Trt_B |
| CARF       | 0.00257 | -0.4552 | 0.486 | 0.4  | 1 | HC_vs_MS.Trt_B |
| COX15      | 0.00257 | -0.4747 | 0.548 | 0.46 | 1 | HC_vs_MS.Trt_B |
| PROSC      | 0.00259 | 0.29781 | 0.414 | 0.33 | 1 | HC_vs_MS.Trt_B |
| SUN1       | 0.0026  | 0.27974 | 0.593 | 0.52 | 1 | HC_vs_MS.Trt_B |
| TGFBR2     | 0.0026  | 1.09581 | 0.162 | 0.1  | 1 | HC_vs_MS.Trt_B |
| SARNP      | 0.0026  | -0.2622 | 0.559 | 0.44 | 1 | HC_vs_MS.Trt_B |
| PTPN4      | 0.00261 | -0.3441 | 0.588 | 0.47 | 1 | HC_vs_MS.Trt_B |
| PPRC1      | 0.00262 | 0.5381  | 0.113 | 0.06 | 1 | HC_vs_MS.Trt_B |
| C11orf21   | 0.00262 | 0.71914 | 0.138 | 0.08 | 1 | HC_vs_MS.Trt_B |
| ELF3       | 0.00262 | 0.38867 | 0.545 | 0.44 | 1 | HC_vs_MS.Trt_B |

|          |         |         |       |      |   |                |
|----------|---------|---------|-------|------|---|----------------|
| BCL9L    | 0.00263 | 0.42471 | 0.17  | 0.11 | 1 | HC_vs_MS.Trt_B |
| TTC34    | 0.00263 | 0.45411 | 0.193 | 0.12 | 1 | HC_vs_MS.Trt_B |
| GRAMD1C  | 0.00263 | 0.45943 | 0.184 | 0.12 | 1 | HC_vs_MS.Trt_B |
| SKAP2    | 0.00263 | 0.98704 | 0.184 | 0.12 | 1 | HC_vs_MS.Trt_B |
| STMN3    | 0.00264 | 0.33115 | 0.225 | 0.16 | 1 | HC_vs_MS.Trt_B |
| FAM101B  | 0.00265 | -0.3754 | 0.246 | 0.17 | 1 | HC_vs_MS.Trt_B |
| C1orf131 | 0.00265 | -0.2882 | 0.575 | 0.49 | 1 | HC_vs_MS.Trt_B |
| MRPS26   | 0.00265 | 0.36465 | 0.122 | 0.07 | 1 | HC_vs_MS.Trt_B |
| CPSF7    | 0.00265 | 0.57665 | 0.212 | 0.15 | 1 | HC_vs_MS.Trt_B |
| MCM9     | 0.00265 | -0.2653 | 0.314 | 0.23 | 1 | HC_vs_MS.Trt_B |
| STAT5A   | 0.00267 | 0.36359 | 0.17  | 0.11 | 1 | HC_vs_MS.Trt_B |
| CMTR2    | 0.00267 | 0.50392 | 0.257 | 0.18 | 1 | HC_vs_MS.Trt_B |
| AQP3     | 0.00267 | 0.38555 | 0.262 | 0.19 | 1 | HC_vs_MS.Trt_B |
| PSMA4    | 0.00269 | -0.319  | 0.349 | 0.26 | 1 | HC_vs_MS.Trt_B |
| BRK1     | 0.00269 | 0.26146 | 0.242 | 0.17 | 1 | HC_vs_MS.Trt_B |
| COQ6     | 0.0027  | 0.49476 | 0.761 | 0.67 | 1 | HC_vs_MS.Trt_B |
| GDPD5    | 0.0027  | 1.28278 | 0.267 | 0.2  | 1 | HC_vs_MS.Trt_B |
| SLC39A14 | 0.00271 | 0.58729 | 0.396 | 0.31 | 1 | HC_vs_MS.Trt_B |
| C19orf48 | 0.00273 | 1.00472 | 0.364 | 0.28 | 1 | HC_vs_MS.Trt_B |
| ZNF526   | 0.00273 | -0.3662 | 0.459 | 0.37 | 1 | HC_vs_MS.Trt_B |
| SEPN1    | 0.00275 | 0.28605 | 0.351 | 0.28 | 1 | HC_vs_MS.Trt_B |
| SULF1    | 0.00276 | 0.42961 | 0.174 | 0.11 | 1 | HC_vs_MS.Trt_B |
| RASGEF1B | 0.00278 | 0.2889  | 0.672 | 0.61 | 1 | HC_vs_MS.Trt_B |
| CDC40    | 0.00278 | 0.35721 | 0.532 | 0.45 | 1 | HC_vs_MS.Trt_B |
| STAT1    | 0.0028  | 0.40026 | 0.42  | 0.35 | 1 | HC_vs_MS.Trt_B |
| ACER1    | 0.00281 | 0.54641 | 0.438 | 0.33 | 1 | HC_vs_MS.Trt_B |
| PPP3R1   | 0.00281 | 0.75449 | 0.158 | 0.1  | 1 | HC_vs_MS.Trt_B |
| USP28    | 0.00282 | 0.55454 | 0.352 | 0.27 | 1 | HC_vs_MS.Trt_B |
| RABL2A   | 0.00283 | 0.29745 | 0.488 | 0.42 | 1 | HC_vs_MS.Trt_B |
| ORC3     | 0.00284 | 0.50509 | 0.158 | 0.1  | 1 | HC_vs_MS.Trt_B |
| ERC1     | 0.00284 | 0.34149 | 0.861 | 0.82 | 1 | HC_vs_MS.Trt_B |
| ZNF699   | 0.00284 | -0.2774 | 0.251 | 0.18 | 1 | HC_vs_MS.Trt_B |
| LAPTM4A  | 0.00285 | 0.39045 | 0.158 | 0.1  | 1 | HC_vs_MS.Trt_B |
| FARSB    | 0.00285 | -0.4778 | 0.594 | 0.52 | 1 | HC_vs_MS.Trt_B |
| UBXN8    | 0.00286 | 1.3199  | 0.177 | 0.12 | 1 | HC_vs_MS.Trt_B |
| TMEM183A | 0.00287 | 0.53557 | 0.183 | 0.12 | 1 | HC_vs_MS.Trt_B |
| ZNF135   | 0.00288 | 0.42751 | 0.432 | 0.34 | 1 | HC_vs_MS.Trt_B |
| MTMR3    | 0.00289 | 0.39452 | 0.249 | 0.18 | 1 | HC_vs_MS.Trt_B |
| LARS2    | 0.0029  | 0.61235 | 0.478 | 0.4  | 1 | HC_vs_MS.Trt_B |
| COMMD1   | 0.00291 | -0.2596 | 0.536 | 0.42 | 1 | HC_vs_MS.Trt_B |

|            |         |         |       |      |   |                |
|------------|---------|---------|-------|------|---|----------------|
| PROX2      | 0.00292 | 0.88347 | 0.123 | 0.07 | 1 | HC_vs_MS.Trt_B |
| AARS       | 0.00292 | 0.38665 | 0.426 | 0.34 | 1 | HC_vs_MS.Trt_B |
| ZNF786     | 0.00294 | -0.4611 | 0.406 | 0.32 | 1 | HC_vs_MS.Trt_B |
| PARK2      | 0.00294 | 0.41348 | 0.604 | 0.53 | 1 | HC_vs_MS.Trt_B |
| FAM227B    | 0.00296 | 0.53058 | 0.387 | 0.31 | 1 | HC_vs_MS.Trt_B |
| EXD1       | 0.00298 | 0.29714 | 0.472 | 0.4  | 1 | HC_vs_MS.Trt_B |
| PLEKHA7    | 0.00298 | -0.9154 | 0.184 | 0.12 | 1 | HC_vs_MS.Trt_B |
| SFMBT1     | 0.00302 | -0.4606 | 0.549 | 0.48 | 1 | HC_vs_MS.Trt_B |
| PDZD2      | 0.00303 | 0.4728  | 0.668 | 0.62 | 1 | HC_vs_MS.Trt_B |
| OGFOD1     | 0.00303 | -0.7335 | 0.596 | 0.53 | 1 | HC_vs_MS.Trt_B |
| PIEZO1     | 0.00303 | 0.33226 | 0.31  | 0.24 | 1 | HC_vs_MS.Trt_B |
| FCRL2      | 0.00306 | 0.2873  | 0.619 | 0.52 | 1 | HC_vs_MS.Trt_B |
| TADA3      | 0.00308 | 0.46967 | 0.52  | 0.44 | 1 | HC_vs_MS.Trt_B |
| MELK       | 0.00309 | 0.27719 | 0.504 | 0.42 | 1 | HC_vs_MS.Trt_B |
| NPIPB8     | 0.00314 | 0.27525 | 0.123 | 0.07 | 1 | HC_vs_MS.Trt_B |
| PHRF1      | 0.00317 | 0.73962 | 0.142 | 0.09 | 1 | HC_vs_MS.Trt_B |
| RP11-619A1 | 0.00321 | 0.2539  | 0.545 | 0.45 | 1 | HC_vs_MS.Trt_B |
| LHFPL2     | 0.00324 | 0.92949 | 0.29  | 0.21 | 1 | HC_vs_MS.Trt_B |
| GSN        | 0.00324 | 0.52179 | 0.554 | 0.45 | 1 | HC_vs_MS.Trt_B |
| TXLNA      | 0.00325 | 0.25672 | 0.277 | 0.2  | 1 | HC_vs_MS.Trt_B |
| FGFR4      | 0.00329 | 0.29441 | 0.393 | 0.31 | 1 | HC_vs_MS.Trt_B |
| C14orf119  | 0.0033  | -0.2819 | 0.533 | 0.43 | 1 | HC_vs_MS.Trt_B |
| NPL        | 0.00331 | -0.3868 | 0.223 | 0.15 | 1 | HC_vs_MS.Trt_B |
| MRPL10     | 0.00332 | -0.2517 | 0.4   | 0.3  | 1 | HC_vs_MS.Trt_B |
| PNPLA8     | 0.00332 | 0.4014  | 0.333 | 0.26 | 1 | HC_vs_MS.Trt_B |
| ICK        | 0.00333 | -0.7141 | 0.207 | 0.14 | 1 | HC_vs_MS.Trt_B |
| MTMR14     | 0.00334 | -0.3075 | 0.571 | 0.45 | 1 | HC_vs_MS.Trt_B |
| NR4A2      | 0.00335 | 0.32072 | 0.146 | 0.09 | 1 | HC_vs_MS.Trt_B |
| PPAT       | 0.00336 | 0.25203 | 0.271 | 0.2  | 1 | HC_vs_MS.Trt_B |
| SLC2A6     | 0.00337 | 0.33121 | 0.262 | 0.19 | 1 | HC_vs_MS.Trt_B |
| TANC1      | 0.00339 | 0.52623 | 0.339 | 0.26 | 1 | HC_vs_MS.Trt_B |
| RNF144A    | 0.00342 | 0.40443 | 0.196 | 0.13 | 1 | HC_vs_MS.Trt_B |
| ZSCAN22    | 0.00342 | 0.31297 | 0.399 | 0.33 | 1 | HC_vs_MS.Trt_B |
| TAS2R4     | 0.00345 | 0.43844 | 0.341 | 0.26 | 1 | HC_vs_MS.Trt_B |
| DOCK6      | 0.00346 | -0.299  | 0.546 | 0.45 | 1 | HC_vs_MS.Trt_B |
| FGF9       | 0.00346 | 0.60467 | 0.13  | 0.08 | 1 | HC_vs_MS.Trt_B |
| MFSD4B     | 0.00347 | 0.42685 | 0.626 | 0.56 | 1 | HC_vs_MS.Trt_B |
| POR        | 0.00347 | 0.40191 | 0.301 | 0.23 | 1 | HC_vs_MS.Trt_B |
| FADS2      | 0.00348 | 0.54014 | 0.486 | 0.4  | 1 | HC_vs_MS.Trt_B |
| BRWD1      | 0.00349 | -0.467  | 0.813 | 0.68 | 1 | HC_vs_MS.Trt_B |

|          |         |         |       |      |   |                |
|----------|---------|---------|-------|------|---|----------------|
| PKN1     | 0.00349 | 0.26251 | 0.803 | 0.69 | 1 | HC_vs_MS.Trt_B |
| CACUL1   | 0.00349 | -0.4925 | 0.664 | 0.56 | 1 | HC_vs_MS.Trt_B |
| FBXO34   | 0.0035  | 0.71484 | 0.113 | 0.06 | 1 | HC_vs_MS.Trt_B |
| LDHC     | 0.00351 | 0.35699 | 0.184 | 0.12 | 1 | HC_vs_MS.Trt_B |
| STXBP6   | 0.00351 | 0.2873  | 0.161 | 0.1  | 1 | HC_vs_MS.Trt_B |
| AGO1     | 0.00353 | 0.5173  | 0.439 | 0.35 | 1 | HC_vs_MS.Trt_B |
| CSNK2A1  | 0.00355 | 0.26555 | 0.654 | 0.56 | 1 | HC_vs_MS.Trt_B |
| RABGGTB  | 0.00356 | 0.34423 | 0.235 | 0.17 | 1 | HC_vs_MS.Trt_B |
| TMEM222  | 0.00356 | 0.82698 | 0.132 | 0.08 | 1 | HC_vs_MS.Trt_B |
| MAP3K4   | 0.00357 | 1.23007 | 0.183 | 0.12 | 1 | HC_vs_MS.Trt_B |
| TMEM132B | 0.00361 | 0.60187 | 0.267 | 0.19 | 1 | HC_vs_MS.Trt_B |
| ANKRD52  | 0.00362 | 0.43079 | 0.174 | 0.11 | 1 | HC_vs_MS.Trt_B |
| PFKFB3   | 0.00363 | 0.35724 | 0.23  | 0.16 | 1 | HC_vs_MS.Trt_B |
| MICALL1  | 0.00365 | 0.29522 | 0.462 | 0.37 | 1 | HC_vs_MS.Trt_B |
| HSDL2    | 0.00366 | 0.71522 | 0.142 | 0.09 | 1 | HC_vs_MS.Trt_B |
| MRPL2    | 0.00368 | -0.4901 | 0.262 | 0.18 | 1 | HC_vs_MS.Trt_B |
| GTSF1    | 0.00369 | 0.41941 | 0.219 | 0.15 | 1 | HC_vs_MS.Trt_B |
| MAB21L3  | 0.00369 | 0.35742 | 0.362 | 0.28 | 1 | HC_vs_MS.Trt_B |
| ZSCAN18  | 0.00369 | 0.29797 | 0.662 | 0.58 | 1 | HC_vs_MS.Trt_B |
| WWOX     | 0.0037  | 0.60088 | 0.236 | 0.17 | 1 | HC_vs_MS.Trt_B |
| CHIC2    | 0.00374 | 0.54393 | 0.171 | 0.11 | 1 | HC_vs_MS.Trt_B |
| ZNF391   | 0.00376 | 0.34591 | 0.184 | 0.12 | 1 | HC_vs_MS.Trt_B |
| COPS6    | 0.00377 | -0.5858 | 0.671 | 0.54 | 1 | HC_vs_MS.Trt_B |
| GIN1     | 0.00378 | -0.8285 | 0.326 | 0.24 | 1 | HC_vs_MS.Trt_B |
| CWC25    | 0.00378 | 0.69933 | 0.333 | 0.26 | 1 | HC_vs_MS.Trt_B |
| ACVR1    | 0.00379 | -0.5653 | 0.193 | 0.13 | 1 | HC_vs_MS.Trt_B |
| KRT15    | 0.00384 | 0.36427 | 0.417 | 0.34 | 1 | HC_vs_MS.Trt_B |
| LEO1     | 0.00387 | 0.83897 | 0.548 | 0.49 | 1 | HC_vs_MS.Trt_B |
| CCDC163  | 0.0039  | 0.61342 | 0.538 | 0.45 | 1 | HC_vs_MS.Trt_B |
| C11orf57 | 0.00393 | -0.4416 | 0.768 | 0.68 | 1 | HC_vs_MS.Trt_B |
| JMJD7    | 0.00393 | 0.49094 | 0.145 | 0.09 | 1 | HC_vs_MS.Trt_B |
| SLC22A25 | 0.00393 | 0.30103 | 0.313 | 0.24 | 1 | HC_vs_MS.Trt_B |
| MTA1     | 0.00394 | 0.4635  | 0.403 | 0.32 | 1 | HC_vs_MS.Trt_B |
| GPHN     | 0.00399 | 0.29559 | 0.387 | 0.31 | 1 | HC_vs_MS.Trt_B |
| GGNBP2   | 0.00403 | -0.35   | 0.681 | 0.6  | 1 | HC_vs_MS.Trt_B |
| PATL2    | 0.00403 | 0.46345 | 0.358 | 0.28 | 1 | HC_vs_MS.Trt_B |
| SLC39A4  | 0.00404 | -0.3332 | 0.386 | 0.3  | 1 | HC_vs_MS.Trt_B |
| MSS51    | 0.00404 | 0.2589  | 0.536 | 0.45 | 1 | HC_vs_MS.Trt_B |
| DPH5     | 0.00405 | -0.3617 | 0.343 | 0.26 | 1 | HC_vs_MS.Trt_B |
| COLEC11  | 0.00406 | 0.94947 | 0.367 | 0.28 | 1 | HC_vs_MS.Trt_B |

|          |         |         |       |      |   |                |
|----------|---------|---------|-------|------|---|----------------|
| SFMBT2   | 0.00409 | 0.84699 | 0.293 | 0.22 | 1 | HC_vs_MS.Trt_B |
| MEF2A    | 0.0041  | 0.90771 | 0.443 | 0.36 | 1 | HC_vs_MS.Trt_B |
| TACR2    | 0.0041  | -0.3579 | 0.129 | 0.08 | 1 | HC_vs_MS.Trt_B |
| TMEM260  | 0.00411 | 0.41767 | 0.4   | 0.33 | 1 | HC_vs_MS.Trt_B |
| PPP4R1   | 0.00412 | 0.29553 | 0.238 | 0.17 | 1 | HC_vs_MS.Trt_B |
| TMEM64   | 0.00413 | 0.37975 | 0.358 | 0.28 | 1 | HC_vs_MS.Trt_B |
| C2orf54  | 0.00413 | 0.3029  | 0.114 | 0.07 | 1 | HC_vs_MS.Trt_B |
| ASUN     | 0.00413 | 0.69784 | 0.109 | 0.06 | 1 | HC_vs_MS.Trt_B |
| STXBP4   | 0.00413 | 0.61559 | 0.483 | 0.38 | 1 | HC_vs_MS.Trt_B |
| MAN2B1   | 0.00414 | 0.37744 | 0.57  | 0.48 | 1 | HC_vs_MS.Trt_B |
| SLC12A7  | 0.00418 | 0.76804 | 0.138 | 0.08 | 1 | HC_vs_MS.Trt_B |
| WDR13    | 0.00418 | -0.4298 | 0.814 | 0.73 | 1 | HC_vs_MS.Trt_B |
| IL4R     | 0.00421 | 0.36308 | 0.425 | 0.34 | 1 | HC_vs_MS.Trt_B |
| NBPF12   | 0.00421 | 0.88939 | 0.312 | 0.24 | 1 | HC_vs_MS.Trt_B |
| ETF1     | 0.00421 | -0.4237 | 0.283 | 0.2  | 1 | HC_vs_MS.Trt_B |
| ABHD14A  | 0.00421 | 0.33461 | 0.457 | 0.4  | 1 | HC_vs_MS.Trt_B |
| TMEM185A | 0.00422 | -0.4835 | 0.483 | 0.39 | 1 | HC_vs_MS.Trt_B |
| ARFGEF2  | 0.00427 | 0.35011 | 0.458 | 0.38 | 1 | HC_vs_MS.Trt_B |
| ACTR6    | 0.00427 | -0.574  | 0.513 | 0.41 | 1 | HC_vs_MS.Trt_B |
| SHF      | 0.00428 | 0.32094 | 0.336 | 0.27 | 1 | HC_vs_MS.Trt_B |
| SLC30A8  | 0.00429 | 0.39751 | 0.401 | 0.32 | 1 | HC_vs_MS.Trt_B |
| G6PC2    | 0.0043  | 0.29369 | 0.272 | 0.2  | 1 | HC_vs_MS.Trt_B |
| ATG2B    | 0.00431 | 0.69121 | 0.296 | 0.23 | 1 | HC_vs_MS.Trt_B |
| WDR82    | 0.00433 | 0.42357 | 0.384 | 0.31 | 1 | HC_vs_MS.Trt_B |
| POMZP3   | 0.00434 | -0.3719 | 0.435 | 0.34 | 1 | HC_vs_MS.Trt_B |
| CLTA     | 0.00434 | 0.29392 | 0.575 | 0.5  | 1 | HC_vs_MS.Trt_B |
| SCAPER   | 0.00435 | 0.49846 | 0.239 | 0.17 | 1 | HC_vs_MS.Trt_B |
| SPHK2    | 0.00435 | 0.26602 | 0.293 | 0.22 | 1 | HC_vs_MS.Trt_B |
| PHKB     | 0.00436 | -0.3762 | 0.745 | 0.62 | 1 | HC_vs_MS.Trt_B |
| DPH3     | 0.00436 | 1.00564 | 0.238 | 0.17 | 1 | HC_vs_MS.Trt_B |
| VARS2    | 0.00438 | 1.43033 | 0.471 | 0.39 | 1 | HC_vs_MS.Trt_B |
| SRSF8    | 0.00441 | -0.2888 | 0.568 | 0.5  | 1 | HC_vs_MS.Trt_B |
| SKIL     | 0.00442 | 0.70492 | 0.277 | 0.2  | 1 | HC_vs_MS.Trt_B |
| APPL2    | 0.00444 | 0.51038 | 0.348 | 0.27 | 1 | HC_vs_MS.Trt_B |
| HTT      | 0.00449 | 0.30956 | 0.236 | 0.16 | 1 | HC_vs_MS.Trt_B |
| STK17A   | 0.00449 | 0.32357 | 0.274 | 0.2  | 1 | HC_vs_MS.Trt_B |
| C1orf162 | 0.00449 | 0.5774  | 0.11  | 0.06 | 1 | HC_vs_MS.Trt_B |
| ZNF84    | 0.00449 | -0.3774 | 0.284 | 0.21 | 1 | HC_vs_MS.Trt_B |
| TTC33    | 0.00451 | -0.399  | 0.228 | 0.16 | 1 | HC_vs_MS.Trt_B |
| DDX47    | 0.00451 | -0.7227 | 0.507 | 0.41 | 1 | HC_vs_MS.Trt_B |

|            |         |         |       |      |   |                |
|------------|---------|---------|-------|------|---|----------------|
| ST3GAL6    | 0.00452 | 0.38396 | 0.31  | 0.23 | 1 | HC_vs_MS.Trt_B |
| NECAP1     | 0.00454 | 0.2634  | 0.436 | 0.35 | 1 | HC_vs_MS.Trt_B |
| ASPSCR1    | 0.00456 | 0.86025 | 0.613 | 0.56 | 1 | HC_vs_MS.Trt_B |
| SET        | 0.00456 | -0.5971 | 0.888 | 0.85 | 1 | HC_vs_MS.Trt_B |
| ADGRG1     | 0.00464 | -0.3078 | 0.654 | 0.58 | 1 | HC_vs_MS.Trt_B |
| HEBP2      | 0.00464 | -1.1199 | 0.377 | 0.29 | 1 | HC_vs_MS.Trt_B |
| HMGNA4     | 0.00467 | 0.28822 | 0.241 | 0.18 | 1 | HC_vs_MS.Trt_B |
| BRE        | 0.00468 | 0.30309 | 0.2   | 0.14 | 1 | HC_vs_MS.Trt_B |
| GULP1      | 0.00468 | 0.32843 | 0.42  | 0.35 | 1 | HC_vs_MS.Trt_B |
| SLC35G2    | 0.00469 | -1.0332 | 0.162 | 0.11 | 1 | HC_vs_MS.Trt_B |
| CTSA       | 0.0047  | 0.34445 | 0.659 | 0.56 | 1 | HC_vs_MS.Trt_B |
| IGF2R      | 0.00471 | -0.2868 | 0.401 | 0.34 | 1 | HC_vs_MS.Trt_B |
| HAUS5      | 0.00473 | -0.5582 | 0.422 | 0.32 | 1 | HC_vs_MS.Trt_B |
| HLX        | 0.00475 | 0.39655 | 0.193 | 0.13 | 1 | HC_vs_MS.Trt_B |
| BTLA       | 0.00476 | 1.31592 | 0.154 | 0.1  | 1 | HC_vs_MS.Trt_B |
| ADAM15     | 0.00477 | 0.51139 | 0.361 | 0.29 | 1 | HC_vs_MS.Trt_B |
| TRIM11     | 0.00479 | 0.43095 | 0.507 | 0.43 | 1 | HC_vs_MS.Trt_B |
| STAG2      | 0.00479 | -0.3922 | 0.765 | 0.67 | 1 | HC_vs_MS.Trt_B |
| WIZ        | 0.00481 | 0.51126 | 0.287 | 0.22 | 1 | HC_vs_MS.Trt_B |
| RP11-722G7 | 0.00481 | 0.40291 | 0.438 | 0.36 | 1 | HC_vs_MS.Trt_B |
| DHRS11     | 0.00481 | -0.4635 | 0.283 | 0.21 | 1 | HC_vs_MS.Trt_B |
| DNAJB13    | 0.00482 | 0.42263 | 0.364 | 0.28 | 1 | HC_vs_MS.Trt_B |
| FDFT1      | 0.00484 | 0.26595 | 0.296 | 0.22 | 1 | HC_vs_MS.Trt_B |
| WDR36      | 0.00484 | 0.49214 | 0.142 | 0.09 | 1 | HC_vs_MS.Trt_B |
| TANC2      | 0.00484 | 0.59515 | 0.257 | 0.18 | 1 | HC_vs_MS.Trt_B |
| ARRDC1     | 0.00485 | 0.52535 | 0.235 | 0.17 | 1 | HC_vs_MS.Trt_B |
| ESPL1      | 0.00487 | 0.25897 | 0.68  | 0.58 | 1 | HC_vs_MS.Trt_B |
| FASTKD1    | 0.00488 | 0.38799 | 0.23  | 0.16 | 1 | HC_vs_MS.Trt_B |
| AR         | 0.00493 | 0.46973 | 0.222 | 0.16 | 1 | HC_vs_MS.Trt_B |
| SDR42E1    | 0.00493 | 0.81509 | 0.386 | 0.31 | 1 | HC_vs_MS.Trt_B |
| COX6C      | 0.00499 | -0.2833 | 0.467 | 0.37 | 1 | HC_vs_MS.Trt_B |
| RNF135     | 0.00502 | 0.54143 | 0.248 | 0.17 | 1 | HC_vs_MS.Trt_B |
| AP003419.1 | 0.00502 | 0.44797 | 0.155 | 0.1  | 1 | HC_vs_MS.Trt_B |
| CACNB2     | 0.00503 | 0.3411  | 0.449 | 0.37 | 1 | HC_vs_MS.Trt_B |
| ABCF2      | 0.00505 | 0.58309 | 0.226 | 0.16 | 1 | HC_vs_MS.Trt_B |
| ZNF441     | 0.00506 | 0.66693 | 0.174 | 0.11 | 1 | HC_vs_MS.Trt_B |
| THRA       | 0.00507 | 0.47711 | 0.142 | 0.09 | 1 | HC_vs_MS.Trt_B |
| CHI3L2     | 0.00508 | 0.52207 | 0.201 | 0.14 | 1 | HC_vs_MS.Trt_B |
| KIAA0430   | 0.00509 | 0.27862 | 0.28  | 0.21 | 1 | HC_vs_MS.Trt_B |
| ZNF701     | 0.00509 | 0.32646 | 0.436 | 0.38 | 1 | HC_vs_MS.Trt_B |



|          |         |         |       |      |   |                |
|----------|---------|---------|-------|------|---|----------------|
| NBPF20   | 0.00512 | 0.35368 | 0.317 | 0.24 | 1 | HC_vs_MS.Trt_B |
| C10orf54 | 0.00512 | 0.28794 | 0.355 | 0.28 | 1 | HC_vs_MS.Trt_B |
| CECR5    | 0.00514 | 0.41757 | 0.175 | 0.12 | 1 | HC_vs_MS.Trt_B |
| LOXL2    | 0.00515 | 0.31167 | 0.71  | 0.63 | 1 | HC_vs_MS.Trt_B |
| CYHR1    | 0.00518 | 0.42581 | 0.268 | 0.21 | 1 | HC_vs_MS.Trt_B |
| TRPC4AP  | 0.00521 | 0.3564  | 0.264 | 0.19 | 1 | HC_vs_MS.Trt_B |
| WDR5B    | 0.00521 | 0.52704 | 0.183 | 0.12 | 1 | HC_vs_MS.Trt_B |
| UNC45B   | 0.00522 | 0.81314 | 0.12  | 0.07 | 1 | HC_vs_MS.Trt_B |
| NME4     | 0.00524 | 0.97277 | 0.116 | 0.07 | 1 | HC_vs_MS.Trt_B |
| CFTR     | 0.00524 | 0.2595  | 0.264 | 0.19 | 1 | HC_vs_MS.Trt_B |
| CBY1     | 0.00524 | 0.53143 | 0.188 | 0.13 | 1 | HC_vs_MS.Trt_B |
| STARD7   | 0.00527 | 0.30918 | 0.499 | 0.43 | 1 | HC_vs_MS.Trt_B |
| HERC6    | 0.00528 | 0.83969 | 0.306 | 0.24 | 1 | HC_vs_MS.Trt_B |
| FAM111A  | 0.00529 | 0.2525  | 0.474 | 0.4  | 1 | HC_vs_MS.Trt_B |
| CREB3L2  | 0.00529 | 0.30626 | 0.445 | 0.39 | 1 | HC_vs_MS.Trt_B |
| SLC25A42 | 0.00531 | -0.765  | 0.538 | 0.47 | 1 | HC_vs_MS.Trt_B |
| AAED1    | 0.00531 | -0.8303 | 0.78  | 0.69 | 1 | HC_vs_MS.Trt_B |
| SLC13A4  | 0.00534 | 0.37351 | 0.345 | 0.27 | 1 | HC_vs_MS.Trt_B |
| UTY      | 0.00537 | 1.1482  | 0.422 | 0.35 | 1 | HC_vs_MS.Trt_B |
| PRNP     | 0.00541 | 0.45674 | 0.187 | 0.13 | 1 | HC_vs_MS.Trt_B |
| GCNT1    | 0.00545 | 0.55138 | 0.249 | 0.18 | 1 | HC_vs_MS.Trt_B |
| GNA13    | 0.00548 | 0.63919 | 0.132 | 0.08 | 1 | HC_vs_MS.Trt_B |
| LETM1    | 0.00548 | -0.2697 | 0.828 | 0.76 | 1 | HC_vs_MS.Trt_B |
| ATP5B    | 0.00548 | 0.27207 | 0.325 | 0.25 | 1 | HC_vs_MS.Trt_B |
| TNKS2    | 0.00549 | 0.33463 | 0.259 | 0.19 | 1 | HC_vs_MS.Trt_B |
| CHMP7    | 0.0055  | 0.35172 | 0.51  | 0.45 | 1 | HC_vs_MS.Trt_B |
| CASP3    | 0.00551 | 0.84741 | 0.12  | 0.07 | 1 | HC_vs_MS.Trt_B |
| DROSHA   | 0.00553 | 0.28638 | 0.332 | 0.26 | 1 | HC_vs_MS.Trt_B |
| TIPIN    | 0.00554 | 0.26259 | 0.562 | 0.48 | 1 | HC_vs_MS.Trt_B |
| UPK3B    | 0.00554 | 0.41212 | 0.113 | 0.07 | 1 | HC_vs_MS.Trt_B |
| RPS15    | 0.00558 | -0.3247 | 0.928 | 0.86 | 1 | HC_vs_MS.Trt_B |
| IPO7     | 0.00558 | -0.501  | 0.4   | 0.32 | 1 | HC_vs_MS.Trt_B |
| KLHL11   | 0.00563 | 0.58388 | 0.475 | 0.41 | 1 | HC_vs_MS.Trt_B |
| TPO      | 0.00565 | 0.61171 | 0.228 | 0.16 | 1 | HC_vs_MS.Trt_B |
| IMPG2    | 0.00567 | 0.25376 | 0.291 | 0.22 | 1 | HC_vs_MS.Trt_B |
| 3-Mar    | 0.00568 | 0.92305 | 0.326 | 0.26 | 1 | HC_vs_MS.Trt_B |
| SREBF2   | 0.00568 | 0.55862 | 0.138 | 0.09 | 1 | HC_vs_MS.Trt_B |
| ANKRD40  | 0.00569 | -0.453  | 0.746 | 0.66 | 1 | HC_vs_MS.Trt_B |
| RBBP7    | 0.00571 | -0.2738 | 0.701 | 0.63 | 1 | HC_vs_MS.Trt_B |
| MOV10    | 0.00575 | 0.30433 | 0.449 | 0.36 | 1 | HC_vs_MS.Trt_B |

|           |         |         |       |      |   |                |
|-----------|---------|---------|-------|------|---|----------------|
| SMUG1     | 0.00579 | -0.4422 | 0.686 | 0.58 | 1 | HC_vs_MS.Trt_B |
| FAM208A   | 0.00581 | -0.4357 | 0.736 | 0.65 | 1 | HC_vs_MS.Trt_B |
| THAP5     | 0.00583 | -0.6204 | 0.87  | 0.8  | 1 | HC_vs_MS.Trt_B |
| USP45     | 0.00586 | 0.77402 | 0.172 | 0.12 | 1 | HC_vs_MS.Trt_B |
| MAPKAP1   | 0.00586 | -0.2699 | 0.362 | 0.28 | 1 | HC_vs_MS.Trt_B |
| RUNDC1    | 0.00591 | 0.25253 | 0.701 | 0.63 | 1 | HC_vs_MS.Trt_B |
| PDGFA     | 0.00592 | 0.6321  | 0.501 | 0.46 | 1 | HC_vs_MS.Trt_B |
| CHRNB1    | 0.00595 | -0.5542 | 0.584 | 0.48 | 1 | HC_vs_MS.Trt_B |
| TEX2      | 0.00596 | 0.62576 | 0.632 | 0.57 | 1 | HC_vs_MS.Trt_B |
| OLFML1    | 0.006   | 0.63196 | 0.225 | 0.17 | 1 | HC_vs_MS.Trt_B |
| APH1A     | 0.006   | 0.34956 | 0.181 | 0.12 | 1 | HC_vs_MS.Trt_B |
| TPRG1L    | 0.00601 | -0.9657 | 0.242 | 0.18 | 1 | HC_vs_MS.Trt_B |
| NOS3      | 0.00601 | 0.54569 | 0.362 | 0.29 | 1 | HC_vs_MS.Trt_B |
| ACRC      | 0.00604 | 0.94959 | 0.423 | 0.34 | 1 | HC_vs_MS.Trt_B |
| USP25     | 0.00605 | -0.2992 | 0.449 | 0.36 | 1 | HC_vs_MS.Trt_B |
| C1orf52   | 0.00605 | 0.62979 | 0.283 | 0.22 | 1 | HC_vs_MS.Trt_B |
| UHRF1BP1L | 0.00615 | -0.4788 | 0.323 | 0.24 | 1 | HC_vs_MS.Trt_B |
| NQO1      | 0.00616 | 0.48478 | 0.517 | 0.46 | 1 | HC_vs_MS.Trt_B |
| IRF4      | 0.00617 | 0.30316 | 0.259 | 0.19 | 1 | HC_vs_MS.Trt_B |
| PHC1      | 0.00617 | 0.58585 | 0.12  | 0.07 | 1 | HC_vs_MS.Trt_B |
| PINK1     | 0.00619 | 0.41207 | 0.268 | 0.19 | 1 | HC_vs_MS.Trt_B |
| ZNF248    | 0.0062  | 0.27363 | 0.149 | 0.1  | 1 | HC_vs_MS.Trt_B |
| MTA2      | 0.00622 | -0.3908 | 0.249 | 0.32 | 1 | HC_vs_MS.Trt_B |
| GABARAPL2 | 0.00624 | -0.2781 | 0.443 | 0.37 | 1 | HC_vs_MS.Trt_B |
| FAM160A1  | 0.00624 | -0.8178 | 0.187 | 0.13 | 1 | HC_vs_MS.Trt_B |
| PPIAL4G   | 0.00624 | -0.3425 | 0.619 | 0.56 | 1 | HC_vs_MS.Trt_B |
| IQCB1     | 0.0063  | 0.40038 | 0.11  | 0.06 | 1 | HC_vs_MS.Trt_B |
| ERGIC3    | 0.00633 | -0.5628 | 0.803 | 0.7  | 1 | HC_vs_MS.Trt_B |
| GRK7      | 0.00635 | -0.2936 | 0.329 | 0.26 | 1 | HC_vs_MS.Trt_B |
| MBD4      | 0.00635 | 0.40352 | 0.249 | 0.18 | 1 | HC_vs_MS.Trt_B |
| MTF1      | 0.00635 | -0.2602 | 0.267 | 0.2  | 1 | HC_vs_MS.Trt_B |
| ZBTB7A    | 0.00635 | 0.49839 | 0.12  | 0.07 | 1 | HC_vs_MS.Trt_B |
| CD300LD   | 0.00637 | 0.25887 | 0.362 | 0.28 | 1 | HC_vs_MS.Trt_B |
| SLC16A4   | 0.0064  | 0.30333 | 0.662 | 0.58 | 1 | HC_vs_MS.Trt_B |
| FGGY      | 0.00643 | 0.64452 | 0.394 | 0.32 | 1 | HC_vs_MS.Trt_B |
| VWA7      | 0.00643 | 0.26275 | 0.313 | 0.24 | 1 | HC_vs_MS.Trt_B |
| SLC2A8    | 0.00645 | 0.38082 | 0.259 | 0.2  | 1 | HC_vs_MS.Trt_B |
| CCDC170   | 0.00646 | -0.2957 | 0.377 | 0.31 | 1 | HC_vs_MS.Trt_B |
| FAM91A1   | 0.00646 | 1.36738 | 0.299 | 0.23 | 1 | HC_vs_MS.Trt_B |
| PIM2      | 0.00647 | 0.26155 | 0.77  | 0.73 | 1 | HC_vs_MS.Trt_B |

|            |         |         |       |      |   |                |
|------------|---------|---------|-------|------|---|----------------|
| EXO1       | 0.00652 | 0.27849 | 0.164 | 0.11 | 1 | HC_vs_MS.Trt_B |
| UST        | 0.00653 | -0.7491 | 0.272 | 0.2  | 1 | HC_vs_MS.Trt_B |
| STRC       | 0.00655 | -0.8177 | 0.503 | 0.43 | 1 | HC_vs_MS.Trt_B |
| DERL1      | 0.00656 | -0.2625 | 0.468 | 0.38 | 1 | HC_vs_MS.Trt_B |
| PLEKHG3    | 0.00659 | 0.31928 | 0.396 | 0.33 | 1 | HC_vs_MS.Trt_B |
| LGSN       | 0.00662 | 0.28131 | 0.452 | 0.38 | 1 | HC_vs_MS.Trt_B |
| GNS        | 0.00662 | 1.05374 | 0.739 | 0.7  | 1 | HC_vs_MS.Trt_B |
| PQLC2      | 0.00664 | -0.2911 | 0.396 | 0.32 | 1 | HC_vs_MS.Trt_B |
| CLDN4      | 0.00667 | 0.69224 | 0.543 | 0.45 | 1 | HC_vs_MS.Trt_B |
| CDH9       | 0.00667 | 0.28924 | 0.12  | 0.07 | 1 | HC_vs_MS.Trt_B |
| ALOX15     | 0.00669 | 0.28206 | 0.145 | 0.09 | 1 | HC_vs_MS.Trt_B |
| MRPS15     | 0.00671 | -0.3558 | 0.49  | 0.42 | 1 | HC_vs_MS.Trt_B |
| TUBA4A     | 0.00674 | 0.2878  | 0.22  | 0.16 | 1 | HC_vs_MS.Trt_B |
| ARFGEF1    | 0.00687 | -0.5137 | 0.628 | 0.53 | 1 | HC_vs_MS.Trt_B |
| CCDC36     | 0.00691 | -0.7494 | 0.333 | 0.25 | 1 | HC_vs_MS.Trt_B |
| TRIM27     | 0.00692 | -0.316  | 0.384 | 0.31 | 1 | HC_vs_MS.Trt_B |
| DCAKD      | 0.00692 | 0.44998 | 0.39  | 0.31 | 1 | HC_vs_MS.Trt_B |
| MYBBP1A    | 0.00693 | 0.5253  | 0.143 | 0.09 | 1 | HC_vs_MS.Trt_B |
| PACS2      | 0.00694 | 0.48817 | 0.246 | 0.19 | 1 | HC_vs_MS.Trt_B |
| C6orf163   | 0.00699 | 0.41722 | 0.452 | 0.36 | 1 | HC_vs_MS.Trt_B |
| KIAA1033   | 0.00705 | 0.28707 | 0.281 | 0.21 | 1 | HC_vs_MS.Trt_B |
| ZNF197     | 0.00708 | 0.59631 | 0.467 | 0.39 | 1 | HC_vs_MS.Trt_B |
| NIN        | 0.00708 | 0.33236 | 0.212 | 0.15 | 1 | HC_vs_MS.Trt_B |
| RRP1B      | 0.00708 | 0.44375 | 0.199 | 0.14 | 1 | HC_vs_MS.Trt_B |
| WNT10A     | 0.00711 | 0.74349 | 0.126 | 0.08 | 1 | HC_vs_MS.Trt_B |
| ACBD4      | 0.00718 | 0.38033 | 0.317 | 0.25 | 1 | HC_vs_MS.Trt_B |
| FAM50A     | 0.00718 | 0.39085 | 0.114 | 0.07 | 1 | HC_vs_MS.Trt_B |
| HSD17B1    | 0.00719 | -0.3944 | 0.725 | 0.62 | 1 | HC_vs_MS.Trt_B |
| ETFA       | 0.0072  | -0.2855 | 0.643 | 0.55 | 1 | HC_vs_MS.Trt_B |
| BZW2       | 0.00721 | 0.43676 | 0.133 | 0.08 | 1 | HC_vs_MS.Trt_B |
| USP49      | 0.00721 | 0.41123 | 0.694 | 0.6  | 1 | HC_vs_MS.Trt_B |
| TMX4       | 0.00725 | 0.27598 | 0.535 | 0.48 | 1 | HC_vs_MS.Trt_B |
| GALNT16    | 0.00726 | 0.34409 | 0.552 | 0.48 | 1 | HC_vs_MS.Trt_B |
| APBB3      | 0.00727 | 0.36591 | 0.123 | 0.07 | 1 | HC_vs_MS.Trt_B |
| ARF6       | 0.00728 | -0.6434 | 0.535 | 0.61 | 1 | HC_vs_MS.Trt_B |
| CTD-3105H1 | 0.00729 | 0.3482  | 0.293 | 0.22 | 1 | HC_vs_MS.Trt_B |
| KBTBD6     | 0.00737 | 1.02137 | 0.325 | 0.25 | 1 | HC_vs_MS.Trt_B |
| AC006449.1 | 0.00739 | 0.37737 | 0.116 | 0.07 | 1 | HC_vs_MS.Trt_B |
| C14orf80   | 0.00742 | -0.9389 | 0.262 | 0.2  | 1 | HC_vs_MS.Trt_B |
| H2AFV      | 0.00745 | -0.4969 | 0.603 | 0.51 | 1 | HC_vs_MS.Trt_B |

|            |         |         |       |      |   |                |
|------------|---------|---------|-------|------|---|----------------|
| KIAA1143   | 0.00745 | 0.52853 | 0.491 | 0.43 | 1 | HC_vs_MS.Trt_B |
| CNOT3      | 0.00747 | 0.99037 | 0.123 | 0.07 | 1 | HC_vs_MS.Trt_B |
| ZNF846     | 0.00749 | 0.52914 | 0.446 | 0.36 | 1 | HC_vs_MS.Trt_B |
| PLA2G4B    | 0.00752 | -0.6222 | 0.448 | 0.38 | 1 | HC_vs_MS.Trt_B |
| ATE1       | 0.00756 | 0.5611  | 0.286 | 0.22 | 1 | HC_vs_MS.Trt_B |
| GM2A       | 0.0076  | 0.70955 | 0.528 | 0.46 | 1 | HC_vs_MS.Trt_B |
| MAP1S      | 0.00762 | 0.42155 | 0.581 | 0.52 | 1 | HC_vs_MS.Trt_B |
| MYSM1      | 0.00765 | 0.26777 | 0.206 | 0.15 | 1 | HC_vs_MS.Trt_B |
| PAPOLG     | 0.00769 | -0.2775 | 0.733 | 0.65 | 1 | HC_vs_MS.Trt_B |
| SYNGR2     | 0.0077  | -0.4821 | 0.555 | 0.46 | 1 | HC_vs_MS.Trt_B |
| GTPBP3     | 0.00771 | -0.4746 | 0.632 | 0.57 | 1 | HC_vs_MS.Trt_B |
| SATB1      | 0.00772 | 0.38144 | 0.239 | 0.18 | 1 | HC_vs_MS.Trt_B |
| SERAC1     | 0.00775 | 0.38968 | 0.442 | 0.36 | 1 | HC_vs_MS.Trt_B |
| RP5-994D16 | 0.0078  | 0.91248 | 0.462 | 0.39 | 1 | HC_vs_MS.Trt_B |
| INPP5E     | 0.00781 | 0.3949  | 0.27  | 0.2  | 1 | HC_vs_MS.Trt_B |
| CASC10     | 0.00787 | -0.4452 | 0.372 | 0.3  | 1 | HC_vs_MS.Trt_B |
| ZMYM4      | 0.00795 | -0.4098 | 0.126 | 0.08 | 1 | HC_vs_MS.Trt_B |
| TRIM34     | 0.00797 | -0.3104 | 0.314 | 0.25 | 1 | HC_vs_MS.Trt_B |
| CCDC90B    | 0.00798 | -0.2537 | 0.957 | 0.87 | 1 | HC_vs_MS.Trt_B |
| CAMKK2     | 0.00798 | 0.84029 | 0.465 | 0.4  | 1 | HC_vs_MS.Trt_B |
| TMEM267    | 0.00799 | 0.77632 | 0.286 | 0.22 | 1 | HC_vs_MS.Trt_B |
| COX19      | 0.008   | 0.25599 | 0.601 | 0.5  | 1 | HC_vs_MS.Trt_B |
| COMMD2     | 0.00804 | 0.3257  | 0.329 | 0.26 | 1 | HC_vs_MS.Trt_B |
| RFTN1      | 0.00805 | 0.46971 | 0.346 | 0.28 | 1 | HC_vs_MS.Trt_B |
| GNLY       | 0.00806 | 0.73852 | 0.226 | 0.17 | 1 | HC_vs_MS.Trt_B |
| SLC25A4    | 0.00808 | -0.79   | 0.272 | 0.21 | 1 | HC_vs_MS.Trt_B |
| KTN1       | 0.0081  | -0.5212 | 0.571 | 0.45 | 1 | HC_vs_MS.Trt_B |
| UBAP1L     | 0.00811 | 0.65482 | 0.355 | 0.29 | 1 | HC_vs_MS.Trt_B |
| VN1R1      | 0.00815 | 0.26345 | 0.154 | 0.1  | 1 | HC_vs_MS.Trt_B |
| TLL2       | 0.00816 | 0.29915 | 0.316 | 0.25 | 1 | HC_vs_MS.Trt_B |
| KIAA0368   | 0.00816 | 0.36069 | 0.212 | 0.15 | 1 | HC_vs_MS.Trt_B |
| AURKA      | 0.00818 | -1.1878 | 0.286 | 0.23 | 1 | HC_vs_MS.Trt_B |
| BLOC1S5    | 0.00821 | -0.2708 | 0.636 | 0.52 | 1 | HC_vs_MS.Trt_B |
| FIS1       | 0.00822 | 0.30275 | 0.235 | 0.17 | 1 | HC_vs_MS.Trt_B |
| YARS2      | 0.00823 | -0.3924 | 0.377 | 0.28 | 1 | HC_vs_MS.Trt_B |
| DPP9       | 0.00824 | 0.25185 | 0.649 | 0.58 | 1 | HC_vs_MS.Trt_B |
| OLAH       | 0.00825 | 0.28126 | 0.432 | 0.37 | 1 | HC_vs_MS.Trt_B |
| USB1       | 0.00829 | 0.49937 | 0.119 | 0.07 | 1 | HC_vs_MS.Trt_B |
| ECHDC3     | 0.00837 | 0.77916 | 0.109 | 0.06 | 1 | HC_vs_MS.Trt_B |
| SENP8      | 0.00839 | -0.2573 | 0.445 | 0.39 | 1 | HC_vs_MS.Trt_B |

|            |         |         |       |      |   |                |
|------------|---------|---------|-------|------|---|----------------|
| MYH14      | 0.00841 | 0.306   | 0.201 | 0.15 | 1 | HC_vs_MS.Trt_B |
| SLC6A6     | 0.00844 | 0.57752 | 0.148 | 0.1  | 1 | HC_vs_MS.Trt_B |
| LXN        | 0.00846 | -0.4101 | 0.168 | 0.11 | 1 | HC_vs_MS.Trt_B |
| RAI1       | 0.00848 | 0.37647 | 0.209 | 0.15 | 1 | HC_vs_MS.Trt_B |
| RECQL5     | 0.00848 | 0.3197  | 0.196 | 0.14 | 1 | HC_vs_MS.Trt_B |
| METTL21B   | 0.00851 | 0.63171 | 0.448 | 0.38 | 1 | HC_vs_MS.Trt_B |
| IQCK       | 0.00854 | 0.55018 | 0.19  | 0.13 | 1 | HC_vs_MS.Trt_B |
| DEPDC1B    | 0.00855 | -0.6965 | 0.206 | 0.15 | 1 | HC_vs_MS.Trt_B |
| SLC1A2     | 0.0086  | 0.56264 | 0.329 | 0.26 | 1 | HC_vs_MS.Trt_B |
| ANKRD16    | 0.00861 | 0.40245 | 0.429 | 0.35 | 1 | HC_vs_MS.Trt_B |
| ASB8       | 0.00865 | 0.28185 | 0.648 | 0.61 | 1 | HC_vs_MS.Trt_B |
| JADE2      | 0.0087  | 0.36405 | 0.155 | 0.1  | 1 | HC_vs_MS.Trt_B |
| ZHX1       | 0.00872 | 0.47659 | 0.548 | 0.49 | 1 | HC_vs_MS.Trt_B |
| DEAF1      | 0.00873 | 0.49946 | 0.296 | 0.22 | 1 | HC_vs_MS.Trt_B |
| SP1        | 0.00873 | 0.78397 | 0.168 | 0.12 | 1 | HC_vs_MS.Trt_B |
| SMN1       | 0.00876 | -0.2736 | 0.383 | 0.3  | 1 | HC_vs_MS.Trt_B |
| VAMP3      | 0.00878 | 0.27159 | 0.278 | 0.21 | 1 | HC_vs_MS.Trt_B |
| ELOVL6     | 0.00879 | 0.34276 | 0.274 | 0.21 | 1 | HC_vs_MS.Trt_B |
| CENPF      | 0.00884 | 0.59376 | 0.343 | 0.26 | 1 | HC_vs_MS.Trt_B |
| UPP1       | 0.00886 | -0.3286 | 0.636 | 0.53 | 1 | HC_vs_MS.Trt_B |
| POLDIP3    | 0.00891 | 0.3671  | 0.119 | 0.07 | 1 | HC_vs_MS.Trt_B |
| CCDC102B   | 0.00891 | 0.59157 | 0.157 | 0.1  | 1 | HC_vs_MS.Trt_B |
| TTC31      | 0.00891 | 0.26908 | 0.206 | 0.15 | 1 | HC_vs_MS.Trt_B |
| TRIM37     | 0.00891 | 0.73188 | 0.17  | 0.11 | 1 | HC_vs_MS.Trt_B |
| PAK6       | 0.00895 | 0.52447 | 0.155 | 0.1  | 1 | HC_vs_MS.Trt_B |
| MDN1       | 0.00902 | 0.25723 | 0.241 | 0.18 | 1 | HC_vs_MS.Trt_B |
| FOXM1      | 0.00914 | 0.67077 | 0.686 | 0.61 | 1 | HC_vs_MS.Trt_B |
| ZCCHC10    | 0.00914 | -0.6671 | 0.586 | 0.49 | 1 | HC_vs_MS.Trt_B |
| LIPC       | 0.0092  | 0.95078 | 0.306 | 0.24 | 1 | HC_vs_MS.Trt_B |
| PSTPIP1    | 0.0093  | -0.3857 | 0.414 | 0.33 | 1 | HC_vs_MS.Trt_B |
| CISD2      | 0.00932 | 0.73043 | 0.439 | 0.35 | 1 | HC_vs_MS.Trt_B |
| CCDC66     | 0.00935 | -0.6155 | 0.601 | 0.51 | 1 | HC_vs_MS.Trt_B |
| P2RY10     | 0.00937 | 0.29188 | 0.309 | 0.23 | 1 | HC_vs_MS.Trt_B |
| OR5A2      | 0.00939 | 0.28174 | 0.219 | 0.16 | 1 | HC_vs_MS.Trt_B |
| N4BP2      | 0.00945 | -0.7469 | 0.332 | 0.26 | 1 | HC_vs_MS.Trt_B |
| TOR4A      | 0.00947 | -0.6649 | 0.187 | 0.13 | 1 | HC_vs_MS.Trt_B |
| ATXN7      | 0.00953 | 0.41107 | 0.497 | 0.42 | 1 | HC_vs_MS.Trt_B |
| CDK17      | 0.00954 | 0.37879 | 0.172 | 0.12 | 1 | HC_vs_MS.Trt_B |
| DDX43      | 0.00955 | 0.90749 | 0.168 | 0.11 | 1 | HC_vs_MS.Trt_B |
| AC138645.2 | 0.00957 | 0.31988 | 0.112 | 0.07 | 1 | HC_vs_MS.Trt_B |

|          |         |         |       |      |   |                |
|----------|---------|---------|-------|------|---|----------------|
| AKR1C1   | 0.00957 | 0.29497 | 0.229 | 0.17 | 1 | HC_vs_MS.Trt_B |
| GAREM2   | 0.00964 | 0.25336 | 0.499 | 0.4  | 1 | HC_vs_MS.Trt_B |
| KLRK1    | 0.00966 | -1.1062 | 0.643 | 0.58 | 1 | HC_vs_MS.Trt_B |
| STAT2    | 0.00969 | 0.25715 | 0.883 | 0.84 | 1 | HC_vs_MS.Trt_B |
| NHEJ1    | 0.0097  | 1.7771  | 0.161 | 0.11 | 1 | HC_vs_MS.Trt_B |
| CTSW     | 0.0097  | -0.6966 | 0.622 | 0.53 | 1 | HC_vs_MS.Trt_B |
| ERCC3    | 0.00972 | -0.6929 | 0.361 | 0.29 | 1 | HC_vs_MS.Trt_B |
| AKT1     | 0.00975 | -0.4341 | 0.203 | 0.14 | 1 | HC_vs_MS.Trt_B |
| PROSER1  | 0.00976 | 0.59885 | 0.171 | 0.12 | 1 | HC_vs_MS.Trt_B |
| ALKBH2   | 0.00979 | 0.54979 | 0.307 | 0.24 | 1 | HC_vs_MS.Trt_B |
| ATN1     | 0.0098  | 0.41576 | 0.17  | 0.12 | 1 | HC_vs_MS.Trt_B |
| TRAPPC2B | 0.00985 | -0.4244 | 0.328 | 0.26 | 1 | HC_vs_MS.Trt_B |
| SART3    | 0.00987 | 0.74842 | 0.138 | 0.09 | 1 | HC_vs_MS.Trt_B |
| MYB      | 0.00989 | 0.87035 | 0.28  | 0.21 | 1 | HC_vs_MS.Trt_B |
| TPRG1    | 0.0099  | 0.39193 | 0.18  | 0.12 | 1 | HC_vs_MS.Trt_B |
| DYNLRB1  | 0.0099  | 0.31005 | 0.177 | 0.12 | 1 | HC_vs_MS.Trt_B |
| SV2C     | 0.00998 | 0.5144  | 0.53  | 0.44 | 1 | HC_vs_MS.Trt_B |
| ZSCAN32  | 0.01    | -0.6941 | 0.235 | 0.17 | 1 | HC_vs_MS.Trt_B |
| APEH     | 0.01001 | 0.31256 | 0.19  | 0.13 | 1 | HC_vs_MS.Trt_B |
| NFKBIA   | 0.01002 | 0.37102 | 0.243 | 0.18 | 1 | HC_vs_MS.Trt_B |
| NDST4    | 0.01002 | 0.43811 | 0.109 | 0.06 | 1 | HC_vs_MS.Trt_B |
| E2F8     | 0.01002 | 0.49351 | 0.133 | 0.09 | 1 | HC_vs_MS.Trt_B |
| ZBTB16   | 0.01004 | -0.7081 | 0.372 | 0.3  | 1 | HC_vs_MS.Trt_B |
| DENND6A  | 0.01005 | 0.3284  | 0.559 | 0.48 | 1 | HC_vs_MS.Trt_B |
| MTX2     | 0.01017 | 0.35999 | 0.191 | 0.14 | 1 | HC_vs_MS.Trt_B |
| MRPS12   | 0.01019 | -0.4805 | 0.371 | 0.3  | 1 | HC_vs_MS.Trt_B |
| SHPK     | 0.01033 | -0.7927 | 0.401 | 0.32 | 1 | HC_vs_MS.Trt_B |
| PKIG     | 0.01033 | -0.2748 | 0.626 | 0.52 | 1 | HC_vs_MS.Trt_B |
| ZNF335   | 0.0104  | 0.30336 | 0.31  | 0.25 | 1 | HC_vs_MS.Trt_B |
| HEXIM1   | 0.01046 | 0.40842 | 0.193 | 0.14 | 1 | HC_vs_MS.Trt_B |
| SLC9A4   | 0.01047 | 0.26035 | 0.483 | 0.41 | 1 | HC_vs_MS.Trt_B |
| WNK3     | 0.0105  | -0.9881 | 0.288 | 0.22 | 1 | HC_vs_MS.Trt_B |
| QRICH2   | 0.01055 | 0.70222 | 0.174 | 0.12 | 1 | HC_vs_MS.Trt_B |
| RMI1     | 0.01057 | -0.3359 | 0.242 | 0.18 | 1 | HC_vs_MS.Trt_B |
| GTF2E1   | 0.01058 | -0.7507 | 0.254 | 0.19 | 1 | HC_vs_MS.Trt_B |
| AGBL2    | 0.01058 | -0.3441 | 0.299 | 0.22 | 1 | HC_vs_MS.Trt_B |
| SETMAR   | 0.0106  | 0.59404 | 0.314 | 0.25 | 1 | HC_vs_MS.Trt_B |
| TCFL5    | 0.01061 | 0.69581 | 0.468 | 0.42 | 1 | HC_vs_MS.Trt_B |
| CDCP1    | 0.01062 | 0.91602 | 0.43  | 0.37 | 1 | HC_vs_MS.Trt_B |
| ANKRD6   | 0.01066 | 0.87542 | 0.165 | 0.11 | 1 | HC_vs_MS.Trt_B |

|          |         |         |       |      |   |                |
|----------|---------|---------|-------|------|---|----------------|
| PIK3AP1  | 0.01067 | -0.9277 | 0.122 | 0.08 | 1 | HC_vs_MS.Trt_B |
| ATP8A1   | 0.01073 | 0.64028 | 0.161 | 0.11 | 1 | HC_vs_MS.Trt_B |
| AGFG2    | 0.01076 | 0.27058 | 0.336 | 0.27 | 1 | HC_vs_MS.Trt_B |
| SRL      | 0.01077 | 0.2877  | 0.346 | 0.29 | 1 | HC_vs_MS.Trt_B |
| SPECC1L  | 0.01077 | 0.3122  | 0.136 | 0.09 | 1 | HC_vs_MS.Trt_B |
| FOXO3    | 0.01079 | 0.40032 | 0.365 | 0.29 | 1 | HC_vs_MS.Trt_B |
| C19orf44 | 0.01083 | -0.4659 | 0.332 | 0.26 | 1 | HC_vs_MS.Trt_B |
| ARMC8    | 0.01087 | 0.26202 | 0.472 | 0.4  | 1 | HC_vs_MS.Trt_B |
| PPP4R3A  | 0.01093 | 0.37955 | 0.204 | 0.15 | 1 | HC_vs_MS.Trt_B |
| NPRL3    | 0.01095 | 0.34721 | 0.299 | 0.23 | 1 | HC_vs_MS.Trt_B |
| SLC15A2  | 0.01097 | -0.4054 | 0.486 | 0.39 | 1 | HC_vs_MS.Trt_B |
| C2CD5    | 0.01103 | 0.38646 | 0.165 | 0.11 | 1 | HC_vs_MS.Trt_B |
| BMPR2    | 0.01103 | 0.41232 | 0.445 | 0.36 | 1 | HC_vs_MS.Trt_B |
| PLCG1    | 0.01109 | 0.27271 | 0.364 | 0.29 | 1 | HC_vs_MS.Trt_B |
| CPT1B    | 0.01111 | 0.9326  | 0.171 | 0.12 | 1 | HC_vs_MS.Trt_B |
| CARNS1   | 0.01113 | 0.30424 | 0.197 | 0.14 | 1 | HC_vs_MS.Trt_B |
| ARFIP1   | 0.01116 | -0.472  | 0.212 | 0.15 | 1 | HC_vs_MS.Trt_B |
| CARD14   | 0.01123 | 0.31032 | 0.762 | 0.69 | 1 | HC_vs_MS.Trt_B |
| GRAMD3   | 0.01132 | -0.4588 | 0.69  | 0.62 | 1 | HC_vs_MS.Trt_B |
| IFT46    | 0.01134 | 0.67905 | 0.206 | 0.15 | 1 | HC_vs_MS.Trt_B |
| AIG1     | 0.01135 | 0.35794 | 0.545 | 0.45 | 1 | HC_vs_MS.Trt_B |
| SMC6     | 0.01157 | -0.4144 | 0.464 | 0.39 | 1 | HC_vs_MS.Trt_B |
| MRPL20   | 0.01162 | -0.2863 | 0.509 | 0.44 | 1 | HC_vs_MS.Trt_B |
| TRRAP    | 0.01163 | 0.55018 | 0.158 | 0.11 | 1 | HC_vs_MS.Trt_B |
| RBM18    | 0.01163 | 0.3125  | 0.312 | 0.24 | 1 | HC_vs_MS.Trt_B |
| USP13    | 0.01168 | 0.69858 | 0.259 | 0.2  | 1 | HC_vs_MS.Trt_B |
| ARHGEF28 | 0.01173 | 0.27033 | 0.165 | 0.11 | 1 | HC_vs_MS.Trt_B |
| NBAS     | 0.01173 | -0.3027 | 0.213 | 0.15 | 1 | HC_vs_MS.Trt_B |
| B3GAT3   | 0.01174 | -0.4544 | 0.532 | 0.42 | 1 | HC_vs_MS.Trt_B |
| TAF1B    | 0.0118  | -0.288  | 0.464 | 0.38 | 1 | HC_vs_MS.Trt_B |
| C6orf25  | 0.01185 | 0.53519 | 0.436 | 0.37 | 1 | HC_vs_MS.Trt_B |
| PTK6     | 0.01188 | 0.66371 | 0.332 | 0.27 | 1 | HC_vs_MS.Trt_B |
| ZBTB40   | 0.01192 | 0.5399  | 0.365 | 0.29 | 1 | HC_vs_MS.Trt_B |
| SEPSECS  | 0.01192 | 0.54649 | 0.758 | 0.68 | 1 | HC_vs_MS.Trt_B |
| NOP56    | 0.01193 | -0.5682 | 0.4   | 0.32 | 1 | HC_vs_MS.Trt_B |
| ZNF614   | 0.01195 | 0.95171 | 0.252 | 0.19 | 1 | HC_vs_MS.Trt_B |
| ZNF257   | 0.01195 | -0.4294 | 0.536 | 0.45 | 1 | HC_vs_MS.Trt_B |
| E2F5     | 0.01196 | 0.72704 | 0.332 | 0.28 | 1 | HC_vs_MS.Trt_B |
| LRWD1    | 0.01207 | -0.2504 | 0.541 | 0.48 | 1 | HC_vs_MS.Trt_B |
| PRIM2    | 0.01207 | 0.27183 | 0.436 | 0.36 | 1 | HC_vs_MS.Trt_B |

|           |         |         |       |      |   |                |
|-----------|---------|---------|-------|------|---|----------------|
| KCTD3     | 0.01212 | 0.32075 | 0.301 | 0.25 | 1 | HC_vs_MS.Trt_B |
| PCDHGB6   | 0.01213 | 0.38658 | 0.352 | 0.29 | 1 | HC_vs_MS.Trt_B |
| PLEKHM3   | 0.01223 | 0.67577 | 0.545 | 0.48 | 1 | HC_vs_MS.Trt_B |
| ZC3H11A   | 0.01226 | 0.32213 | 0.204 | 0.15 | 1 | HC_vs_MS.Trt_B |
| RDH11     | 0.01226 | -0.2647 | 0.52  | 0.44 | 1 | HC_vs_MS.Trt_B |
| GRAP2     | 0.01236 | 0.36993 | 0.268 | 0.21 | 1 | HC_vs_MS.Trt_B |
| NDUFA12   | 0.01236 | -0.933  | 0.168 | 0.22 | 1 | HC_vs_MS.Trt_B |
| MPC2      | 0.01238 | -0.4738 | 0.428 | 0.36 | 1 | HC_vs_MS.Trt_B |
| ERLIN2    | 0.0124  | 0.29108 | 0.358 | 0.29 | 1 | HC_vs_MS.Trt_B |
| CERKL     | 0.0124  | -0.4516 | 0.354 | 0.28 | 1 | HC_vs_MS.Trt_B |
| GYS1      | 0.01246 | 0.26822 | 0.139 | 0.09 | 1 | HC_vs_MS.Trt_B |
| PVR       | 0.01259 | -0.4811 | 0.454 | 0.39 | 1 | HC_vs_MS.Trt_B |
| GCKR      | 0.0126  | 0.44641 | 0.139 | 0.09 | 1 | HC_vs_MS.Trt_B |
| CD40      | 0.01261 | 0.2738  | 0.143 | 0.09 | 1 | HC_vs_MS.Trt_B |
| RASGRP2   | 0.01265 | 0.28236 | 0.384 | 0.32 | 1 | HC_vs_MS.Trt_B |
| LIN7C     | 0.0127  | 0.38903 | 0.297 | 0.24 | 1 | HC_vs_MS.Trt_B |
| PSTK      | 0.01271 | -0.4863 | 0.338 | 0.26 | 1 | HC_vs_MS.Trt_B |
| CMPK1     | 0.01279 | 0.33613 | 0.232 | 0.17 | 1 | HC_vs_MS.Trt_B |
| SDSL      | 0.0128  | 0.48928 | 0.328 | 0.26 | 1 | HC_vs_MS.Trt_B |
| SPA17     | 0.01282 | 0.55061 | 0.212 | 0.15 | 1 | HC_vs_MS.Trt_B |
| ODF2      | 0.01284 | 0.45158 | 0.461 | 0.4  | 1 | HC_vs_MS.Trt_B |
| ANKRD20A3 | 0.01285 | 0.36845 | 0.112 | 0.07 | 1 | HC_vs_MS.Trt_B |
| VAPA      | 0.01307 | -0.3315 | 0.732 | 0.64 | 1 | HC_vs_MS.Trt_B |
| CHAMP1    | 0.01308 | 0.52842 | 0.581 | 0.52 | 1 | HC_vs_MS.Trt_B |
| TANGO2    | 0.01321 | 0.33761 | 0.841 | 0.77 | 1 | HC_vs_MS.Trt_B |
| ZNF599    | 0.01325 | -0.3502 | 0.565 | 0.46 | 1 | HC_vs_MS.Trt_B |
| IFT74     | 0.01326 | -0.2781 | 0.375 | 0.31 | 1 | HC_vs_MS.Trt_B |
| AGGF1     | 0.0134  | 0.65834 | 0.123 | 0.08 | 1 | HC_vs_MS.Trt_B |
| DERL2     | 0.01343 | -0.3705 | 0.268 | 0.2  | 1 | HC_vs_MS.Trt_B |
| PIGBOS1   | 0.01347 | -0.4534 | 0.558 | 0.5  | 1 | HC_vs_MS.Trt_B |
| RGS14     | 0.01348 | 0.28629 | 0.194 | 0.14 | 1 | HC_vs_MS.Trt_B |
| SLC14A1   | 0.01349 | -0.2732 | 0.484 | 0.4  | 1 | HC_vs_MS.Trt_B |
| KIF9      | 0.01353 | 0.45005 | 0.106 | 0.06 | 1 | HC_vs_MS.Trt_B |
| ZNF563    | 0.01358 | 0.62388 | 0.516 | 0.42 | 1 | HC_vs_MS.Trt_B |
| MIS12     | 0.01363 | -0.3287 | 0.291 | 0.22 | 1 | HC_vs_MS.Trt_B |
| RUFY2     | 0.01363 | 0.35081 | 0.507 | 0.42 | 1 | HC_vs_MS.Trt_B |
| NRIP2     | 0.01365 | 0.74289 | 0.336 | 0.27 | 1 | HC_vs_MS.Trt_B |
| NEIL3     | 0.01369 | 0.57224 | 0.259 | 0.2  | 1 | HC_vs_MS.Trt_B |
| BAG2      | 0.01372 | 0.42784 | 0.23  | 0.17 | 1 | HC_vs_MS.Trt_B |
| RASSF1    | 0.01377 | 1.03209 | 0.155 | 0.11 | 1 | HC_vs_MS.Trt_B |



|          |         |         |       |      |   |                |
|----------|---------|---------|-------|------|---|----------------|
| PET100   | 0.01379 | -0.4397 | 0.623 | 0.53 | 1 | HC_vs_MS.Trt_B |
| RAB26    | 0.0138  | -0.2618 | 0.132 | 0.09 | 1 | HC_vs_MS.Trt_B |
| PIGA     | 0.01382 | -0.6467 | 0.39  | 0.32 | 1 | HC_vs_MS.Trt_B |
| AIRE     | 0.01385 | 0.30542 | 0.217 | 0.16 | 1 | HC_vs_MS.Trt_B |
| SH3GLB1  | 0.01387 | 0.28043 | 0.439 | 0.39 | 1 | HC_vs_MS.Trt_B |
| HAVCR2   | 0.01393 | -0.3222 | 0.514 | 0.43 | 1 | HC_vs_MS.Trt_B |
| HSPB9    | 0.01398 | 0.59014 | 0.203 | 0.15 | 1 | HC_vs_MS.Trt_B |
| TMSB15B  | 0.01398 | 0.6414  | 0.288 | 0.22 | 1 | HC_vs_MS.Trt_B |
| C1orf146 | 0.01407 | 0.35657 | 0.165 | 0.11 | 1 | HC_vs_MS.Trt_B |
| CNNM2    | 0.0141  | 0.47317 | 0.264 | 0.21 | 1 | HC_vs_MS.Trt_B |
| CC2D2A   | 0.01415 | 0.31419 | 0.241 | 0.18 | 1 | HC_vs_MS.Trt_B |
| KLHL9    | 0.01418 | -0.6166 | 0.343 | 0.28 | 1 | HC_vs_MS.Trt_B |
| PES1     | 0.01432 | 0.57854 | 0.104 | 0.06 | 1 | HC_vs_MS.Trt_B |
| AGBL1    | 0.01433 | 0.28773 | 0.339 | 0.28 | 1 | HC_vs_MS.Trt_B |
| LST1     | 0.01434 | -0.3457 | 0.245 | 0.18 | 1 | HC_vs_MS.Trt_B |
| IGHMBP2  | 0.01442 | 1.09075 | 0.349 | 0.29 | 1 | HC_vs_MS.Trt_B |
| TGDS     | 0.01454 | -0.3432 | 0.107 | 0.07 | 1 | HC_vs_MS.Trt_B |
| TMEM159  | 0.01456 | 0.38061 | 0.607 | 0.56 | 1 | HC_vs_MS.Trt_B |
| RNF170   | 0.0146  | -0.3046 | 0.546 | 0.47 | 1 | HC_vs_MS.Trt_B |
| TJP2     | 0.01464 | 0.52426 | 0.339 | 0.28 | 1 | HC_vs_MS.Trt_B |
| POLA2    | 0.01467 | 0.37293 | 0.597 | 0.53 | 1 | HC_vs_MS.Trt_B |
| RAC1     | 0.01468 | 0.25507 | 0.151 | 0.1  | 1 | HC_vs_MS.Trt_B |
| JUNB     | 0.01468 | 0.28021 | 0.354 | 0.29 | 1 | HC_vs_MS.Trt_B |
| CNIH3    | 0.01469 | 0.40082 | 0.171 | 0.12 | 1 | HC_vs_MS.Trt_B |
| BBS1     | 0.01474 | 0.31215 | 0.577 | 0.5  | 1 | HC_vs_MS.Trt_B |
| PDE8A    | 0.01481 | 0.72887 | 0.397 | 0.33 | 1 | HC_vs_MS.Trt_B |
| SORBS1   | 0.01483 | 0.43192 | 0.219 | 0.16 | 1 | HC_vs_MS.Trt_B |
| SNAP47   | 0.01486 | 0.41707 | 0.12  | 0.08 | 1 | HC_vs_MS.Trt_B |
| SLC39A9  | 0.01487 | 0.91007 | 0.174 | 0.12 | 1 | HC_vs_MS.Trt_B |
| GPR89B   | 0.01492 | 0.2885  | 0.314 | 0.25 | 1 | HC_vs_MS.Trt_B |
| MRPL19   | 0.01497 | 0.58237 | 0.243 | 0.19 | 1 | HC_vs_MS.Trt_B |
| RAP1GAP2 | 0.01501 | 0.47885 | 0.191 | 0.14 | 1 | HC_vs_MS.Trt_B |
| FUNDC2   | 0.01529 | -0.6192 | 0.451 | 0.39 | 1 | HC_vs_MS.Trt_B |
| FMR1     | 0.01542 | 0.89578 | 0.103 | 0.06 | 1 | HC_vs_MS.Trt_B |
| VPS13A   | 0.01544 | -0.3948 | 0.287 | 0.22 | 1 | HC_vs_MS.Trt_B |
| MITF     | 0.01544 | 0.36338 | 0.139 | 0.09 | 1 | HC_vs_MS.Trt_B |
| C2CD2L   | 0.01546 | 0.59598 | 0.409 | 0.36 | 1 | HC_vs_MS.Trt_B |
| TMUB2    | 0.01549 | -0.3264 | 0.813 | 0.74 | 1 | HC_vs_MS.Trt_B |
| AP3S1    | 0.0155  | -0.2538 | 0.319 | 0.26 | 1 | HC_vs_MS.Trt_B |
| CASP9    | 0.01551 | -0.6813 | 0.328 | 0.26 | 1 | HC_vs_MS.Trt_B |

|          |         |         |       |      |   |                |
|----------|---------|---------|-------|------|---|----------------|
| TACO1    | 0.01552 | 0.59901 | 0.37  | 0.31 | 1 | HC_vs_MS.Trt_B |
| ZNF530   | 0.01556 | 0.69488 | 0.483 | 0.41 | 1 | HC_vs_MS.Trt_B |
| PNP      | 0.01557 | 0.65822 | 0.316 | 0.24 | 1 | HC_vs_MS.Trt_B |
| MLYCD    | 0.0156  | 0.32984 | 0.357 | 0.29 | 1 | HC_vs_MS.Trt_B |
| DOPEY1   | 0.01562 | 0.38927 | 0.288 | 0.22 | 1 | HC_vs_MS.Trt_B |
| FERMT2   | 0.01576 | 0.2515  | 0.452 | 0.39 | 1 | HC_vs_MS.Trt_B |
| YES1     | 0.01583 | -0.3987 | 0.358 | 0.29 | 1 | HC_vs_MS.Trt_B |
| FGF11    | 0.01589 | 0.39649 | 0.21  | 0.15 | 1 | HC_vs_MS.Trt_B |
| FBXO32   | 0.01601 | 0.55022 | 0.145 | 0.1  | 1 | HC_vs_MS.Trt_B |
| MFSD9    | 0.01604 | 0.4912  | 0.488 | 0.42 | 1 | HC_vs_MS.Trt_B |
| RPS6KA1  | 0.01604 | 0.37218 | 0.174 | 0.12 | 1 | HC_vs_MS.Trt_B |
| NUDT6    | 0.01609 | -0.6228 | 0.475 | 0.39 | 1 | HC_vs_MS.Trt_B |
| TTC38    | 0.01611 | 1.13657 | 0.429 | 0.36 | 1 | HC_vs_MS.Trt_B |
| SIK3     | 0.01613 | 1.07361 | 0.243 | 0.19 | 1 | HC_vs_MS.Trt_B |
| CCDC126  | 0.0162  | -0.6115 | 0.116 | 0.07 | 1 | HC_vs_MS.Trt_B |
| NBPF1    | 0.01628 | 0.80376 | 0.229 | 0.17 | 1 | HC_vs_MS.Trt_B |
| ZNF672   | 0.01632 | -0.2863 | 0.236 | 0.17 | 1 | HC_vs_MS.Trt_B |
| SSU72    | 0.01655 | -0.2915 | 0.89  | 0.82 | 1 | HC_vs_MS.Trt_B |
| THBS1    | 0.01661 | 0.45992 | 0.209 | 0.16 | 1 | HC_vs_MS.Trt_B |
| LCA5L    | 0.01678 | 0.37106 | 0.342 | 0.28 | 1 | HC_vs_MS.Trt_B |
| GRWD1    | 0.0168  | 0.32247 | 0.457 | 0.38 | 1 | HC_vs_MS.Trt_B |
| EVI5L    | 0.01685 | 0.42292 | 0.268 | 0.21 | 1 | HC_vs_MS.Trt_B |
| FAM188B  | 0.01686 | 0.41451 | 0.165 | 0.11 | 1 | HC_vs_MS.Trt_B |
| ZNF287   | 0.01689 | 0.32445 | 0.365 | 0.31 | 1 | HC_vs_MS.Trt_B |
| UQCRB    | 0.0169  | -0.562  | 0.677 | 0.58 | 1 | HC_vs_MS.Trt_B |
| OAS2     | 0.0169  | 0.33209 | 0.213 | 0.16 | 1 | HC_vs_MS.Trt_B |
| MASP1    | 0.017   | 0.28623 | 0.238 | 0.19 | 1 | HC_vs_MS.Trt_B |
| COX7A2   | 0.017   | -0.6436 | 0.719 | 0.63 | 1 | HC_vs_MS.Trt_B |
| ZNF789   | 0.01702 | -0.2751 | 0.728 | 0.65 | 1 | HC_vs_MS.Trt_B |
| FAM192A  | 0.01714 | -0.3405 | 0.417 | 0.34 | 1 | HC_vs_MS.Trt_B |
| ARHGAP19 | 0.01715 | -0.8489 | 0.27  | 0.21 | 1 | HC_vs_MS.Trt_B |
| DENND2D  | 0.01717 | 0.32379 | 0.384 | 0.32 | 1 | HC_vs_MS.Trt_B |
| LAMC3    | 0.0173  | -0.7488 | 0.264 | 0.2  | 1 | HC_vs_MS.Trt_B |
| ANKRD17  | 0.01732 | 0.48415 | 0.251 | 0.19 | 1 | HC_vs_MS.Trt_B |
| PKD2     | 0.01736 | 0.87098 | 0.183 | 0.13 | 1 | HC_vs_MS.Trt_B |
| FAM185A  | 0.01737 | 0.3292  | 0.103 | 0.06 | 1 | HC_vs_MS.Trt_B |
| CCP110   | 0.0174  | 0.98975 | 0.481 | 0.43 | 1 | HC_vs_MS.Trt_B |
| LAMP3    | 0.01742 | 0.92481 | 0.394 | 0.34 | 1 | HC_vs_MS.Trt_B |
| UBE3D    | 0.01745 | -0.8177 | 0.528 | 0.44 | 1 | HC_vs_MS.Trt_B |
| SIAH3    | 0.01749 | 0.25142 | 0.125 | 0.08 | 1 | HC_vs_MS.Trt_B |

|            |         |         |       |      |   |                |
|------------|---------|---------|-------|------|---|----------------|
| MRPL35     | 0.01753 | 0.25404 | 0.106 | 0.07 | 1 | HC_vs_MS.Trt_B |
| KDM5C      | 0.01767 | 0.50305 | 0.37  | 0.3  | 1 | HC_vs_MS.Trt_B |
| GPR174     | 0.01772 | 0.4024  | 0.154 | 0.11 | 1 | HC_vs_MS.Trt_B |
| KDEL1R1    | 0.01772 | 0.65546 | 0.243 | 0.19 | 1 | HC_vs_MS.Trt_B |
| GBP1       | 0.01773 | 0.41375 | 0.229 | 0.17 | 1 | HC_vs_MS.Trt_B |
| RCC1       | 0.01779 | 0.27924 | 0.159 | 0.11 | 1 | HC_vs_MS.Trt_B |
| MRPL34     | 0.01783 | -0.332  | 0.329 | 0.26 | 1 | HC_vs_MS.Trt_B |
| DAZAP1     | 0.01807 | 0.4611  | 0.17  | 0.12 | 1 | HC_vs_MS.Trt_B |
| EXD2       | 0.01811 | 1.0966  | 0.181 | 0.13 | 1 | HC_vs_MS.Trt_B |
| PLEKHG5    | 0.01811 | 0.43643 | 0.165 | 0.12 | 1 | HC_vs_MS.Trt_B |
| ZNF230     | 0.01813 | 0.86275 | 0.568 | 0.51 | 1 | HC_vs_MS.Trt_B |
| ZNF678     | 0.0182  | 1.33179 | 0.172 | 0.12 | 1 | HC_vs_MS.Trt_B |
| ATF6       | 0.0182  | 0.32543 | 0.209 | 0.16 | 1 | HC_vs_MS.Trt_B |
| SPPL2B     | 0.01822 | 0.66945 | 0.368 | 0.31 | 1 | HC_vs_MS.Trt_B |
| ENTPD6     | 0.01828 | 0.74036 | 0.12  | 0.08 | 1 | HC_vs_MS.Trt_B |
| PRR13      | 0.01829 | -0.3991 | 0.781 | 0.68 | 1 | HC_vs_MS.Trt_B |
| NTPCR      | 0.01833 | -0.3542 | 0.391 | 0.33 | 1 | HC_vs_MS.Trt_B |
| DPY30      | 0.01847 | -0.282  | 0.377 | 0.3  | 1 | HC_vs_MS.Trt_B |
| FBXL22     | 0.01847 | 0.38762 | 0.103 | 0.06 | 1 | HC_vs_MS.Trt_B |
| PGF        | 0.01852 | -0.261  | 0.238 | 0.19 | 1 | HC_vs_MS.Trt_B |
| BAG5       | 0.01853 | -0.2689 | 0.323 | 0.26 | 1 | HC_vs_MS.Trt_B |
| CDKN2AIPNI | 0.01854 | -0.4472 | 0.51  | 0.41 | 1 | HC_vs_MS.Trt_B |
| GPM6A      | 0.01857 | 0.31873 | 0.28  | 0.22 | 1 | HC_vs_MS.Trt_B |
| RAB8B      | 0.01866 | 0.7026  | 0.178 | 0.13 | 1 | HC_vs_MS.Trt_B |
| GLOD4      | 0.01867 | -0.4189 | 0.612 | 0.53 | 1 | HC_vs_MS.Trt_B |
| IRF7       | 0.01878 | 0.90689 | 0.112 | 0.07 | 1 | HC_vs_MS.Trt_B |
| URGCP      | 0.01883 | -0.5243 | 0.459 | 0.39 | 1 | HC_vs_MS.Trt_B |
| FANCC      | 0.01889 | 0.95818 | 0.264 | 0.21 | 1 | HC_vs_MS.Trt_B |
| U2AF1      | 0.01894 | -0.6025 | 0.535 | 0.44 | 1 | HC_vs_MS.Trt_B |
| TCTN2      | 0.01898 | -0.3522 | 0.73  | 0.62 | 1 | HC_vs_MS.Trt_B |
| SMAD3      | 0.01917 | 0.53481 | 0.139 | 0.09 | 1 | HC_vs_MS.Trt_B |
| JMJD1C     | 0.01919 | 0.27    | 0.22  | 0.17 | 1 | HC_vs_MS.Trt_B |
| ZNF107     | 0.01919 | 0.37642 | 0.41  | 0.36 | 1 | HC_vs_MS.Trt_B |
| ZNF594     | 0.0192  | -1.0913 | 0.419 | 0.35 | 1 | HC_vs_MS.Trt_B |
| DUSP4      | 0.01924 | 0.28943 | 0.164 | 0.11 | 1 | HC_vs_MS.Trt_B |
| MTUS1      | 0.01927 | 0.55302 | 0.339 | 0.27 | 1 | HC_vs_MS.Trt_B |
| ZNF592     | 0.01933 | 0.49346 | 0.167 | 0.12 | 1 | HC_vs_MS.Trt_B |
| GLB1L2     | 0.0194  | -0.5694 | 0.341 | 0.27 | 1 | HC_vs_MS.Trt_B |
| ANKRD7     | 0.01945 | 0.4615  | 0.171 | 0.12 | 1 | HC_vs_MS.Trt_B |
| BIRC2      | 0.01948 | 0.69614 | 0.133 | 0.09 | 1 | HC_vs_MS.Trt_B |

|          |         |         |       |      |   |                |
|----------|---------|---------|-------|------|---|----------------|
| LRR47    | 0.01965 | 0.3297  | 0.281 | 0.22 | 1 | HC_vs_MS.Trt_B |
| SMARCC1  | 0.01981 | 0.38349 | 0.423 | 0.36 | 1 | HC_vs_MS.Trt_B |
| USP42    | 0.01984 | 0.25837 | 0.449 | 0.39 | 1 | HC_vs_MS.Trt_B |
| NLE1     | 0.01994 | 0.9654  | 0.214 | 0.17 | 1 | HC_vs_MS.Trt_B |
| ANKRD9   | 0.01998 | 0.46602 | 0.47  | 0.41 | 1 | HC_vs_MS.Trt_B |
| SMARCD1  | 0.01999 | 0.50359 | 0.132 | 0.09 | 1 | HC_vs_MS.Trt_B |
| OAZ3     | 0.01999 | -0.7537 | 0.38  | 0.31 | 1 | HC_vs_MS.Trt_B |
| TOP3B    | 0.02013 | 0.5208  | 0.133 | 0.09 | 1 | HC_vs_MS.Trt_B |
| SUB1     | 0.02026 | -0.3501 | 0.551 | 0.45 | 1 | HC_vs_MS.Trt_B |
| RALGPS2  | 0.02039 | -0.581  | 0.354 | 0.3  | 1 | HC_vs_MS.Trt_B |
| CCDC97   | 0.02043 | 0.34714 | 0.126 | 0.08 | 1 | HC_vs_MS.Trt_B |
| KLHL8    | 0.02044 | -0.3258 | 0.599 | 0.51 | 1 | HC_vs_MS.Trt_B |
| SNX3     | 0.02052 | -0.381  | 0.158 | 0.11 | 1 | HC_vs_MS.Trt_B |
| UBB      | 0.02071 | -0.4754 | 0.503 | 0.54 | 1 | HC_vs_MS.Trt_B |
| POMGNT1  | 0.02081 | 0.67543 | 0.662 | 0.61 | 1 | HC_vs_MS.Trt_B |
| GABRA6   | 0.02087 | -0.2509 | 0.067 | 0.11 | 1 | HC_vs_MS.Trt_B |
| OCIAD2   | 0.02107 | -0.6436 | 0.626 | 0.54 | 1 | HC_vs_MS.Trt_B |
| USP7     | 0.02113 | -0.3298 | 0.304 | 0.24 | 1 | HC_vs_MS.Trt_B |
| TMEM106A | 0.02117 | -0.4499 | 0.677 | 0.6  | 1 | HC_vs_MS.Trt_B |
| ZBTB38   | 0.02125 | -0.2524 | 0.535 | 0.47 | 1 | HC_vs_MS.Trt_B |
| ATP10A   | 0.02129 | 0.38782 | 0.101 | 0.06 | 1 | HC_vs_MS.Trt_B |
| ZNF688   | 0.0213  | -0.9712 | 0.529 | 0.48 | 1 | HC_vs_MS.Trt_B |
| KLHDC10  | 0.02146 | -0.3624 | 0.387 | 0.31 | 1 | HC_vs_MS.Trt_B |
| DDX56    | 0.02148 | 0.27967 | 0.217 | 0.17 | 1 | HC_vs_MS.Trt_B |
| APIP     | 0.02148 | 0.53991 | 0.455 | 0.41 | 1 | HC_vs_MS.Trt_B |
| AHR      | 0.02157 | 0.53955 | 0.607 | 0.55 | 1 | HC_vs_MS.Trt_B |
| CCDC137  | 0.02161 | -0.7638 | 0.225 | 0.17 | 1 | HC_vs_MS.Trt_B |
| FAM210B  | 0.02164 | 0.31198 | 0.31  | 0.25 | 1 | HC_vs_MS.Trt_B |
| CCDC22   | 0.02165 | 0.42253 | 0.129 | 0.09 | 1 | HC_vs_MS.Trt_B |
| ARL13B   | 0.02167 | 0.39209 | 0.187 | 0.14 | 1 | HC_vs_MS.Trt_B |
| GDI1     | 0.02193 | 0.57604 | 0.274 | 0.22 | 1 | HC_vs_MS.Trt_B |
| CTPS1    | 0.0221  | -0.6146 | 0.609 | 0.55 | 1 | HC_vs_MS.Trt_B |
| ZNF610   | 0.02211 | 0.40846 | 0.362 | 0.31 | 1 | HC_vs_MS.Trt_B |
| GSE1     | 0.02214 | 0.612   | 0.338 | 0.28 | 1 | HC_vs_MS.Trt_B |
| XKR8     | 0.02216 | 1.19785 | 0.17  | 0.12 | 1 | HC_vs_MS.Trt_B |
| TOR1A    | 0.0222  | -0.5602 | 0.68  | 0.58 | 1 | HC_vs_MS.Trt_B |
| ZNF497   | 0.0223  | 1.48243 | 0.268 | 0.21 | 1 | HC_vs_MS.Trt_B |
| TBC1D31  | 0.02246 | 0.26629 | 0.597 | 0.52 | 1 | HC_vs_MS.Trt_B |
| TMEM42   | 0.02251 | -0.4048 | 0.113 | 0.07 | 1 | HC_vs_MS.Trt_B |
| POLR1C   | 0.02254 | 0.52426 | 0.412 | 0.36 | 1 | HC_vs_MS.Trt_B |

|           |         |         |       |      |   |                |
|-----------|---------|---------|-------|------|---|----------------|
| PODXL     | 0.02264 | 0.29783 | 0.193 | 0.15 | 1 | HC_vs_MS.Trt_B |
| CXorf21   | 0.02265 | 1.01641 | 0.286 | 0.23 | 1 | HC_vs_MS.Trt_B |
| PTER      | 0.02267 | 0.54723 | 0.152 | 0.11 | 1 | HC_vs_MS.Trt_B |
| DUSP18    | 0.02273 | 0.28659 | 0.586 | 0.54 | 1 | HC_vs_MS.Trt_B |
| PGGHG     | 0.02278 | 0.6005  | 0.146 | 0.1  | 1 | HC_vs_MS.Trt_B |
| FAR2      | 0.02287 | 0.5624  | 0.186 | 0.14 | 1 | HC_vs_MS.Trt_B |
| KLRC1     | 0.02288 | 0.36725 | 0.291 | 0.23 | 1 | HC_vs_MS.Trt_B |
| CPNE2     | 0.02296 | -0.7463 | 0.372 | 0.31 | 1 | HC_vs_MS.Trt_B |
| CLIP4     | 0.02303 | 1.02568 | 0.125 | 0.09 | 1 | HC_vs_MS.Trt_B |
| FSBP      | 0.02306 | 0.89219 | 0.314 | 0.26 | 1 | HC_vs_MS.Trt_B |
| FAM160B1  | 0.02308 | 0.37751 | 0.191 | 0.14 | 1 | HC_vs_MS.Trt_B |
| CXXC1     | 0.02316 | 0.50735 | 0.149 | 0.11 | 1 | HC_vs_MS.Trt_B |
| INTS4     | 0.02322 | 0.45064 | 0.341 | 0.28 | 1 | HC_vs_MS.Trt_B |
| TNFRSF10B | 0.0233  | 0.72603 | 0.404 | 0.34 | 1 | HC_vs_MS.Trt_B |
| ZNF280B   | 0.02332 | -0.5215 | 0.116 | 0.08 | 1 | HC_vs_MS.Trt_B |
| PTBP2     | 0.02334 | -0.5098 | 0.562 | 0.47 | 1 | HC_vs_MS.Trt_B |
| GTPBP2    | 0.02346 | -0.34   | 0.516 | 0.46 | 1 | HC_vs_MS.Trt_B |
| RIPK1     | 0.02349 | 0.74581 | 0.167 | 0.12 | 1 | HC_vs_MS.Trt_B |
| C12orf43  | 0.02355 | -0.2963 | 0.843 | 0.77 | 1 | HC_vs_MS.Trt_B |
| DCP1A     | 0.02357 | 0.42535 | 0.355 | 0.29 | 1 | HC_vs_MS.Trt_B |
| C8orf76   | 0.02376 | -0.3068 | 0.572 | 0.5  | 1 | HC_vs_MS.Trt_B |
| JKAMP     | 0.0238  | -0.4733 | 0.745 | 0.68 | 1 | HC_vs_MS.Trt_B |
| GSK3A     | 0.0239  | 0.75551 | 0.328 | 0.27 | 1 | HC_vs_MS.Trt_B |
| ANKRD42   | 0.02398 | 0.28078 | 0.384 | 0.33 | 1 | HC_vs_MS.Trt_B |
| HEMGN     | 0.02401 | -0.3607 | 0.117 | 0.08 | 1 | HC_vs_MS.Trt_B |
| SEC24C    | 0.02402 | 0.56926 | 0.22  | 0.17 | 1 | HC_vs_MS.Trt_B |
| RTTN      | 0.02412 | 0.70557 | 0.239 | 0.19 | 1 | HC_vs_MS.Trt_B |
| STK24     | 0.02419 | -0.3693 | 0.254 | 0.2  | 1 | HC_vs_MS.Trt_B |
| METTL10   | 0.02423 | -0.2588 | 0.317 | 0.25 | 1 | HC_vs_MS.Trt_B |
| PI4KB     | 0.02424 | 0.60327 | 0.167 | 0.12 | 1 | HC_vs_MS.Trt_B |
| TMEM185B  | 0.02426 | 1.01378 | 0.332 | 0.27 | 1 | HC_vs_MS.Trt_B |
| TK2       | 0.02427 | 0.25718 | 0.126 | 0.09 | 1 | HC_vs_MS.Trt_B |
| ECT2L     | 0.02438 | 0.29119 | 0.277 | 0.22 | 1 | HC_vs_MS.Trt_B |
| COMMD10   | 0.02438 | -0.5509 | 0.275 | 0.22 | 1 | HC_vs_MS.Trt_B |
| MRPS18B   | 0.02441 | -0.5023 | 0.661 | 0.58 | 1 | HC_vs_MS.Trt_B |
| TMEM248   | 0.02441 | 0.37447 | 0.168 | 0.12 | 1 | HC_vs_MS.Trt_B |
| ATP6VOC   | 0.02445 | 0.35483 | 0.213 | 0.16 | 1 | HC_vs_MS.Trt_B |
| RAB11A    | 0.02452 | -0.4974 | 0.626 | 0.56 | 1 | HC_vs_MS.Trt_B |
| NOLC1     | 0.02456 | 0.37581 | 0.103 | 0.07 | 1 | HC_vs_MS.Trt_B |
| NMI       | 0.0246  | -0.5021 | 0.274 | 0.22 | 1 | HC_vs_MS.Trt_B |

|            |         |         |       |      |   |                |
|------------|---------|---------|-------|------|---|----------------|
| ZNF33B     | 0.02462 | 0.37669 | 0.497 | 0.4  | 1 | HC_vs_MS.Trt_B |
| LZTR1      | 0.02467 | 1.13482 | 0.248 | 0.2  | 1 | HC_vs_MS.Trt_B |
| PHYH       | 0.02467 | 0.34679 | 0.165 | 0.12 | 1 | HC_vs_MS.Trt_B |
| BRMS1      | 0.0247  | 0.49925 | 0.141 | 0.1  | 1 | HC_vs_MS.Trt_B |
| TMA7       | 0.02473 | -0.7578 | 0.516 | 0.53 | 1 | HC_vs_MS.Trt_B |
| RADIL      | 0.02477 | 0.33252 | 0.281 | 0.23 | 1 | HC_vs_MS.Trt_B |
| SSPO       | 0.02497 | 0.97647 | 0.123 | 0.08 | 1 | HC_vs_MS.Trt_B |
| ZDHHC7     | 0.02501 | 0.72999 | 0.17  | 0.12 | 1 | HC_vs_MS.Trt_B |
| FRMD8      | 0.02503 | 0.31984 | 0.565 | 0.5  | 1 | HC_vs_MS.Trt_B |
| POTEI      | 0.02504 | 0.3953  | 0.19  | 0.14 | 1 | HC_vs_MS.Trt_B |
| APEX2      | 0.02514 | 0.43452 | 0.307 | 0.25 | 1 | HC_vs_MS.Trt_B |
| MYO9B      | 0.02517 | 0.46657 | 0.22  | 0.17 | 1 | HC_vs_MS.Trt_B |
| NUP54      | 0.02523 | 0.39952 | 0.18  | 0.13 | 1 | HC_vs_MS.Trt_B |
| VPS41      | 0.02527 | 0.59557 | 0.452 | 0.41 | 1 | HC_vs_MS.Trt_B |
| DNAH6      | 0.02532 | 0.49916 | 0.168 | 0.12 | 1 | HC_vs_MS.Trt_B |
| RASGRF2    | 0.02534 | 0.40889 | 0.165 | 0.12 | 1 | HC_vs_MS.Trt_B |
| USF1       | 0.02536 | 0.49659 | 0.146 | 0.1  | 1 | HC_vs_MS.Trt_B |
| YWHAH      | 0.02544 | -0.279  | 0.125 | 0.08 | 1 | HC_vs_MS.Trt_B |
| SELENBP1   | 0.02545 | 0.32789 | 0.275 | 0.22 | 1 | HC_vs_MS.Trt_B |
| ING1       | 0.02548 | -0.6119 | 0.543 | 0.5  | 1 | HC_vs_MS.Trt_B |
| ESD        | 0.02552 | 0.5191  | 0.114 | 0.08 | 1 | HC_vs_MS.Trt_B |
| AMMECR1    | 0.02552 | 0.62654 | 0.132 | 0.09 | 1 | HC_vs_MS.Trt_B |
| ARFGAP1    | 0.02562 | 0.47301 | 0.133 | 0.09 | 1 | HC_vs_MS.Trt_B |
| SEMA4B     | 0.02566 | 0.27665 | 0.397 | 0.34 | 1 | HC_vs_MS.Trt_B |
| WDR70      | 0.02571 | 0.36792 | 0.264 | 0.21 | 1 | HC_vs_MS.Trt_B |
| SNTG2      | 0.02573 | 0.25057 | 0.219 | 0.17 | 1 | HC_vs_MS.Trt_B |
| SOCS7      | 0.02575 | 0.641   | 0.349 | 0.29 | 1 | HC_vs_MS.Trt_B |
| STX3       | 0.02577 | 0.35127 | 0.377 | 0.34 | 1 | HC_vs_MS.Trt_B |
| PSMB4      | 0.02592 | -0.4985 | 0.278 | 0.34 | 1 | HC_vs_MS.Trt_B |
| STON2      | 0.02595 | 0.45461 | 0.258 | 0.21 | 1 | HC_vs_MS.Trt_B |
| TXNL1      | 0.02601 | 0.36301 | 0.629 | 0.56 | 1 | HC_vs_MS.Trt_B |
| CDK7       | 0.02606 | 0.71245 | 0.135 | 0.09 | 1 | HC_vs_MS.Trt_B |
| C8orf59    | 0.02607 | -0.2916 | 0.348 | 0.28 | 1 | HC_vs_MS.Trt_B |
| CLDN15     | 0.02608 | 0.45641 | 0.394 | 0.33 | 1 | HC_vs_MS.Trt_B |
| ESF1       | 0.02609 | 0.2941  | 0.136 | 0.09 | 1 | HC_vs_MS.Trt_B |
| TRIP12     | 0.0262  | -0.3726 | 0.458 | 0.38 | 1 | HC_vs_MS.Trt_B |
| RELA       | 0.02624 | 0.25746 | 0.154 | 0.11 | 1 | HC_vs_MS.Trt_B |
| RALGPS1    | 0.02629 | -0.5042 | 0.38  | 0.3  | 1 | HC_vs_MS.Trt_B |
| ZSCAN12    | 0.02635 | 0.31902 | 0.42  | 0.36 | 1 | HC_vs_MS.Trt_B |
| RP4-635E18 | 0.02641 | -0.8235 | 0.212 | 0.26 | 1 | HC_vs_MS.Trt_B |

|            |         |         |       |      |   |                |
|------------|---------|---------|-------|------|---|----------------|
| NR1D1      | 0.02641 | 0.56473 | 0.11  | 0.07 | 1 | HC_vs_MS.Trt_B |
| SMC4       | 0.02644 | -0.61   | 0.449 | 0.36 | 1 | HC_vs_MS.Trt_B |
| NDUFS8     | 0.02667 | -0.2554 | 0.767 | 0.74 | 1 | HC_vs_MS.Trt_B |
| ARMC6      | 0.02667 | -0.4046 | 0.303 | 0.24 | 1 | HC_vs_MS.Trt_B |
| SBF1       | 0.02668 | 0.3404  | 0.2   | 0.15 | 1 | HC_vs_MS.Trt_B |
| JAKMIP2    | 0.02668 | 0.39469 | 0.352 | 0.31 | 1 | HC_vs_MS.Trt_B |
| FOXRED1    | 0.02669 | 0.5495  | 0.507 | 0.43 | 1 | HC_vs_MS.Trt_B |
| SLC12A4    | 0.02673 | 1.30485 | 0.19  | 0.14 | 1 | HC_vs_MS.Trt_B |
| TFRC       | 0.02674 | -0.2899 | 0.574 | 0.49 | 1 | HC_vs_MS.Trt_B |
| BRD3       | 0.02681 | -0.2791 | 0.168 | 0.12 | 1 | HC_vs_MS.Trt_B |
| DTNB       | 0.0269  | 0.61574 | 0.154 | 0.11 | 1 | HC_vs_MS.Trt_B |
| TRERF1     | 0.02692 | 0.28606 | 0.183 | 0.14 | 1 | HC_vs_MS.Trt_B |
| DIP2B      | 0.02698 | 0.33294 | 0.359 | 0.31 | 1 | HC_vs_MS.Trt_B |
| RLF        | 0.02743 | 0.27804 | 0.168 | 0.12 | 1 | HC_vs_MS.Trt_B |
| TRIM58     | 0.02746 | 0.3712  | 0.564 | 0.51 | 1 | HC_vs_MS.Trt_B |
| UNC13A     | 0.02753 | 0.49648 | 0.261 | 0.21 | 1 | HC_vs_MS.Trt_B |
| LPAR2      | 0.02761 | 0.65836 | 0.11  | 0.07 | 1 | HC_vs_MS.Trt_B |
| MAPK8      | 0.02775 | -0.3479 | 0.393 | 0.33 | 1 | HC_vs_MS.Trt_B |
| SLC6A16    | 0.02775 | 0.71392 | 0.243 | 0.19 | 1 | HC_vs_MS.Trt_B |
| ZNF527     | 0.02785 | 0.25446 | 0.933 | 0.87 | 1 | HC_vs_MS.Trt_B |
| LIG3       | 0.02789 | 1.13738 | 0.33  | 0.28 | 1 | HC_vs_MS.Trt_B |
| ZNF664     | 0.02791 | -0.2881 | 0.233 | 0.18 | 1 | HC_vs_MS.Trt_B |
| EML3       | 0.02792 | 0.32084 | 0.216 | 0.16 | 1 | HC_vs_MS.Trt_B |
| ZNF134     | 0.02793 | -0.3984 | 0.174 | 0.13 | 1 | HC_vs_MS.Trt_B |
| COX5B      | 0.02796 | -0.6009 | 0.759 | 0.68 | 1 | HC_vs_MS.Trt_B |
| PRKG2      | 0.0281  | 0.26922 | 0.391 | 0.31 | 1 | HC_vs_MS.Trt_B |
| DNA2       | 0.02816 | 0.29385 | 0.217 | 0.17 | 1 | HC_vs_MS.Trt_B |
| HACL1      | 0.02829 | 0.66844 | 0.125 | 0.09 | 1 | HC_vs_MS.Trt_B |
| IGF1R      | 0.02831 | 0.50661 | 0.354 | 0.3  | 1 | HC_vs_MS.Trt_B |
| RAB17      | 0.02833 | 0.25411 | 0.23  | 0.18 | 1 | HC_vs_MS.Trt_B |
| DUSP10     | 0.02856 | 0.67168 | 0.141 | 0.1  | 1 | HC_vs_MS.Trt_B |
| PSIP1      | 0.0286  | -0.2532 | 0.758 | 0.69 | 1 | HC_vs_MS.Trt_B |
| RP4-583P15 | 0.02865 | -0.2562 | 0.283 | 0.22 | 1 | HC_vs_MS.Trt_B |
| LRRC8B     | 0.02888 | 0.36803 | 0.409 | 0.35 | 1 | HC_vs_MS.Trt_B |
| MCMDC2     | 0.02904 | -0.4727 | 0.419 | 0.36 | 1 | HC_vs_MS.Trt_B |
| PREB       | 0.02915 | 0.78699 | 0.116 | 0.08 | 1 | HC_vs_MS.Trt_B |
| ZNF221     | 0.0292  | 0.36516 | 0.245 | 0.19 | 1 | HC_vs_MS.Trt_B |
| RWDD2A     | 0.02922 | 0.44723 | 0.416 | 0.35 | 1 | HC_vs_MS.Trt_B |
| USP36      | 0.02933 | 0.64322 | 0.239 | 0.19 | 1 | HC_vs_MS.Trt_B |
| B4GALT3    | 0.02943 | 0.46502 | 0.157 | 0.11 | 1 | HC_vs_MS.Trt_B |

|         |         |         |       |      |   |                |
|---------|---------|---------|-------|------|---|----------------|
| NCAPG2  | 0.02944 | -2.4333 | 0.159 | 0.2  | 1 | HC_vs_MS.Trt_B |
| KNSTRN  | 0.02947 | 0.37708 | 0.475 | 0.41 | 1 | HC_vs_MS.Trt_B |
| PIK3CG  | 0.0295  | 0.47057 | 0.238 | 0.18 | 1 | HC_vs_MS.Trt_B |
| TONSL   | 0.02962 | 0.33235 | 0.597 | 0.54 | 1 | HC_vs_MS.Trt_B |
| DUS3L   | 0.02991 | 0.25109 | 0.123 | 0.08 | 1 | HC_vs_MS.Trt_B |
| SETDB1  | 0.02993 | 0.33983 | 0.517 | 0.47 | 1 | HC_vs_MS.Trt_B |
| ZFHX3   | 0.02994 | 0.85062 | 0.143 | 0.1  | 1 | HC_vs_MS.Trt_B |
| L3HYPDH | 0.02996 | -0.3225 | 0.194 | 0.14 | 1 | HC_vs_MS.Trt_B |
| NUMBL   | 0.02999 | 0.43932 | 0.51  | 0.47 | 1 | HC_vs_MS.Trt_B |
| FBXO6   | 0.03027 | 0.42894 | 0.617 | 0.55 | 1 | HC_vs_MS.Trt_B |
| RAP1B   | 0.0304  | -0.6194 | 0.993 | 0.96 | 1 | HC_vs_MS.Trt_B |
| CALD1   | 0.03046 | 0.27115 | 0.191 | 0.14 | 1 | HC_vs_MS.Trt_B |
| MMRN2   | 0.03064 | -0.8282 | 0.152 | 0.11 | 1 | HC_vs_MS.Trt_B |
| EXD3    | 0.03096 | 0.31487 | 0.43  | 0.37 | 1 | HC_vs_MS.Trt_B |
| GMFG    | 0.03132 | -0.3482 | 0.772 | 0.63 | 1 | HC_vs_MS.Trt_B |
| EPHA4   | 0.03151 | -0.6652 | 0.184 | 0.13 | 1 | HC_vs_MS.Trt_B |
| ZNF428  | 0.03164 | 0.25067 | 0.157 | 0.11 | 1 | HC_vs_MS.Trt_B |
| DUSP3   | 0.03165 | 0.43088 | 0.732 | 0.72 | 1 | HC_vs_MS.Trt_B |
| FASTKD5 | 0.03181 | -0.5928 | 0.077 | 0.11 | 1 | HC_vs_MS.Trt_B |
| HABP4   | 0.03184 | -0.5442 | 0.104 | 0.07 | 1 | HC_vs_MS.Trt_B |
| ZNF71   | 0.03207 | 0.47206 | 0.204 | 0.16 | 1 | HC_vs_MS.Trt_B |
| SLC9A8  | 0.03214 | 0.41866 | 0.175 | 0.13 | 1 | HC_vs_MS.Trt_B |
| SSFA2   | 0.03219 | -0.2895 | 0.119 | 0.08 | 1 | HC_vs_MS.Trt_B |
| FAM173B | 0.0322  | -0.6204 | 0.172 | 0.13 | 1 | HC_vs_MS.Trt_B |
| LRRC1   | 0.0323  | 0.52219 | 0.258 | 0.21 | 1 | HC_vs_MS.Trt_B |
| SORD    | 0.0323  | 0.73014 | 0.142 | 0.1  | 1 | HC_vs_MS.Trt_B |
| TXNDC12 | 0.03246 | 0.47457 | 0.152 | 0.11 | 1 | HC_vs_MS.Trt_B |
| ZNF700  | 0.03254 | 0.78726 | 0.148 | 0.11 | 1 | HC_vs_MS.Trt_B |
| ZNF749  | 0.03264 | 0.96865 | 0.38  | 0.34 | 1 | HC_vs_MS.Trt_B |
| PRKCZ   | 0.03268 | 0.88696 | 0.239 | 0.19 | 1 | HC_vs_MS.Trt_B |
| ZNF736  | 0.03285 | 0.71729 | 0.47  | 0.42 | 1 | HC_vs_MS.Trt_B |
| ZNF432  | 0.03291 | 0.83517 | 0.552 | 0.48 | 1 | HC_vs_MS.Trt_B |
| ZNF721  | 0.03292 | 0.59931 | 0.296 | 0.25 | 1 | HC_vs_MS.Trt_B |
| ZMYM2   | 0.03294 | -0.3575 | 0.351 | 0.29 | 1 | HC_vs_MS.Trt_B |
| PPM1L   | 0.03294 | 0.98791 | 0.236 | 0.19 | 1 | HC_vs_MS.Trt_B |
| FAM210A | 0.03304 | -0.361  | 0.257 | 0.21 | 1 | HC_vs_MS.Trt_B |
| KCTD10  | 0.03322 | 0.45777 | 0.371 | 0.31 | 1 | HC_vs_MS.Trt_B |
| PRRG1   | 0.03323 | 0.38765 | 0.174 | 0.13 | 1 | HC_vs_MS.Trt_B |
| MRPL49  | 0.03326 | -0.4199 | 0.455 | 0.39 | 1 | HC_vs_MS.Trt_B |
| AKR1B1  | 0.03336 | -0.3627 | 0.733 | 0.67 | 1 | HC_vs_MS.Trt_B |



|            |         |         |       |      |   |                |
|------------|---------|---------|-------|------|---|----------------|
| ZNF354A    | 0.03344 | 0.36918 | 0.18  | 0.14 | 1 | HC_vs_MS.Trt_B |
| CHST11     | 0.03349 | 0.29976 | 0.152 | 0.11 | 1 | HC_vs_MS.Trt_B |
| FAM214A    | 0.03352 | -0.3581 | 0.193 | 0.14 | 1 | HC_vs_MS.Trt_B |
| WRN        | 0.03363 | 0.62906 | 0.432 | 0.38 | 1 | HC_vs_MS.Trt_B |
| LPAR6      | 0.03363 | -0.2583 | 0.396 | 0.34 | 1 | HC_vs_MS.Trt_B |
| UBA5       | 0.03365 | -0.4735 | 0.142 | 0.1  | 1 | HC_vs_MS.Trt_B |
| EEF1E1     | 0.03384 | -0.3478 | 0.52  | 0.47 | 1 | HC_vs_MS.Trt_B |
| DNPEP      | 0.03387 | 0.56374 | 0.448 | 0.4  | 1 | HC_vs_MS.Trt_B |
| CMC1       | 0.03399 | -0.5128 | 0.161 | 0.12 | 1 | HC_vs_MS.Trt_B |
| MAT2A      | 0.03409 | 0.58647 | 0.126 | 0.09 | 1 | HC_vs_MS.Trt_B |
| ZNF552     | 0.03421 | -0.6077 | 0.399 | 0.33 | 1 | HC_vs_MS.Trt_B |
| PLD6       | 0.03442 | 0.45716 | 0.435 | 0.38 | 1 | HC_vs_MS.Trt_B |
| SIGMAR1    | 0.03448 | 0.36281 | 0.184 | 0.14 | 1 | HC_vs_MS.Trt_B |
| LRP1       | 0.03466 | 0.33152 | 0.216 | 0.17 | 1 | HC_vs_MS.Trt_B |
| PAM16      | 0.03482 | 0.59656 | 0.181 | 0.14 | 1 | HC_vs_MS.Trt_B |
| USP30      | 0.03482 | -0.4813 | 0.267 | 0.21 | 1 | HC_vs_MS.Trt_B |
| DIABLO     | 0.03485 | -0.3481 | 0.674 | 0.59 | 1 | HC_vs_MS.Trt_B |
| HSPH1      | 0.03494 | 0.57719 | 0.165 | 0.12 | 1 | HC_vs_MS.Trt_B |
| ZNF517     | 0.035   | 0.56923 | 0.375 | 0.33 | 1 | HC_vs_MS.Trt_B |
| ANO8       | 0.03513 | 0.46771 | 0.133 | 0.09 | 1 | HC_vs_MS.Trt_B |
| CCDC138    | 0.03514 | -0.5912 | 0.157 | 0.11 | 1 | HC_vs_MS.Trt_B |
| STXBP2     | 0.03522 | 0.36115 | 0.252 | 0.21 | 1 | HC_vs_MS.Trt_B |
| EFR3A      | 0.03528 | 0.78519 | 0.135 | 0.1  | 1 | HC_vs_MS.Trt_B |
| DDX60      | 0.03537 | 0.33893 | 0.123 | 0.09 | 1 | HC_vs_MS.Trt_B |
| ZNF740     | 0.0354  | 0.36028 | 0.142 | 0.1  | 1 | HC_vs_MS.Trt_B |
| AKAP2      | 0.03555 | 0.32875 | 0.254 | 0.2  | 1 | HC_vs_MS.Trt_B |
| FAM149B1   | 0.03558 | -0.7496 | 0.178 | 0.13 | 1 | HC_vs_MS.Trt_B |
| RP11-327P2 | 0.03565 | 0.40194 | 0.116 | 0.08 | 1 | HC_vs_MS.Trt_B |
| KIF27      | 0.03568 | -0.6177 | 0.303 | 0.24 | 1 | HC_vs_MS.Trt_B |
| RRN3       | 0.03599 | 0.4858  | 0.245 | 0.2  | 1 | HC_vs_MS.Trt_B |
| PGS1       | 0.0361  | 0.34112 | 0.57  | 0.51 | 1 | HC_vs_MS.Trt_B |
| STARD5     | 0.03611 | 0.34799 | 0.114 | 0.08 | 1 | HC_vs_MS.Trt_B |
| DLEC1      | 0.03615 | 0.43166 | 0.429 | 0.38 | 1 | HC_vs_MS.Trt_B |
| TAF4       | 0.03629 | 0.2633  | 0.123 | 0.08 | 1 | HC_vs_MS.Trt_B |
| SCYL2      | 0.03629 | 0.80789 | 0.11  | 0.07 | 1 | HC_vs_MS.Trt_B |
| CASP4      | 0.0365  | -0.5199 | 0.336 | 0.26 | 1 | HC_vs_MS.Trt_B |
| ANP32A     | 0.03653 | 0.33395 | 0.274 | 0.23 | 1 | HC_vs_MS.Trt_B |
| TESMIN     | 0.03672 | 0.30982 | 0.629 | 0.55 | 1 | HC_vs_MS.Trt_B |
| STX10      | 0.03685 | 0.58188 | 0.12  | 0.08 | 1 | HC_vs_MS.Trt_B |
| NDUFAF1    | 0.03701 | -0.2512 | 0.365 | 0.31 | 1 | HC_vs_MS.Trt_B |

|            |         |         |       |      |   |                |
|------------|---------|---------|-------|------|---|----------------|
| SUPT16H    | 0.03705 | -0.2714 | 0.678 | 0.63 | 1 | HC_vs_MS.Trt_B |
| EDA        | 0.03706 | 0.62411 | 0.33  | 0.27 | 1 | HC_vs_MS.Trt_B |
| FO538757.1 | 0.03717 | 0.54259 | 0.162 | 0.12 | 1 | HC_vs_MS.Trt_B |
| TAPBPL     | 0.03725 | 0.26228 | 0.2   | 0.16 | 1 | HC_vs_MS.Trt_B |
| PCGF3      | 0.03729 | 0.42739 | 0.229 | 0.18 | 1 | HC_vs_MS.Trt_B |
| KCNMB3     | 0.03735 | -0.6132 | 0.367 | 0.3  | 1 | HC_vs_MS.Trt_B |
| MYOZ3      | 0.03744 | 0.5592  | 0.243 | 0.2  | 1 | HC_vs_MS.Trt_B |
| EPB41L2    | 0.03753 | 0.53034 | 0.112 | 0.07 | 1 | HC_vs_MS.Trt_B |
| RGS1       | 0.03769 | 0.55768 | 0.129 | 0.09 | 1 | HC_vs_MS.Trt_B |
| ZNF812P    | 0.03782 | 0.45242 | 0.109 | 0.07 | 1 | HC_vs_MS.Trt_B |
| MGLL       | 0.03803 | 0.30693 | 0.319 | 0.27 | 1 | HC_vs_MS.Trt_B |
| BANK1      | 0.03858 | -0.8276 | 0.168 | 0.12 | 1 | HC_vs_MS.Trt_B |
| ARFIP2     | 0.03874 | 0.6607  | 0.432 | 0.37 | 1 | HC_vs_MS.Trt_B |
| GMDS       | 0.03883 | 0.28293 | 0.112 | 0.08 | 1 | HC_vs_MS.Trt_B |
| ST3GAL5    | 0.03932 | -0.8643 | 0.284 | 0.23 | 1 | HC_vs_MS.Trt_B |
| CAMLG      | 0.03944 | -0.4838 | 0.442 | 0.35 | 1 | HC_vs_MS.Trt_B |
| PTPN23     | 0.03959 | 0.43192 | 0.142 | 0.1  | 1 | HC_vs_MS.Trt_B |
| POU2F1     | 0.03995 | 0.40323 | 0.419 | 0.35 | 1 | HC_vs_MS.Trt_B |
| ZBTB4      | 0.03999 | 0.57077 | 0.126 | 0.09 | 1 | HC_vs_MS.Trt_B |
| EIF4E2     | 0.03999 | -0.5271 | 0.322 | 0.26 | 1 | HC_vs_MS.Trt_B |
| PNPLA1     | 0.04029 | 0.37374 | 0.309 | 0.25 | 1 | HC_vs_MS.Trt_B |
| PSMC4      | 0.04036 | -0.4518 | 0.457 | 0.39 | 1 | HC_vs_MS.Trt_B |
| C1orf159   | 0.04059 | 0.57172 | 0.114 | 0.08 | 1 | HC_vs_MS.Trt_B |
| MED1       | 0.0408  | 0.86476 | 0.307 | 0.27 | 1 | HC_vs_MS.Trt_B |
| SMAD5      | 0.04083 | 0.3954  | 0.441 | 0.37 | 1 | HC_vs_MS.Trt_B |
| RIPK2      | 0.04091 | 1.30303 | 0.161 | 0.12 | 1 | HC_vs_MS.Trt_B |
| NKIRAS1    | 0.04092 | 1.20775 | 0.239 | 0.2  | 1 | HC_vs_MS.Trt_B |
| ZFP2       | 0.04109 | 1.0484  | 0.19  | 0.14 | 1 | HC_vs_MS.Trt_B |
| SH2B3      | 0.04109 | 0.44301 | 0.142 | 0.1  | 1 | HC_vs_MS.Trt_B |
| C21orf2    | 0.04147 | 0.31664 | 0.123 | 0.09 | 1 | HC_vs_MS.Trt_B |
| DPP8       | 0.04148 | 0.28514 | 0.357 | 0.29 | 1 | HC_vs_MS.Trt_B |
| RNF138     | 0.04199 | 0.30963 | 0.145 | 0.11 | 1 | HC_vs_MS.Trt_B |
| EML5       | 0.0421  | 1.23494 | 0.223 | 0.17 | 1 | HC_vs_MS.Trt_B |
| LILRB3     | 0.04211 | 0.77811 | 0.123 | 0.09 | 1 | HC_vs_MS.Trt_B |
| IDH1       | 0.04211 | 0.48252 | 0.191 | 0.15 | 1 | HC_vs_MS.Trt_B |
| DSTN       | 0.04212 | -0.7894 | 0.494 | 0.43 | 1 | HC_vs_MS.Trt_B |
| TNFRSF13C  | 0.04225 | -0.2843 | 0.62  | 0.54 | 1 | HC_vs_MS.Trt_B |
| HIGD2A     | 0.04249 | -0.2542 | 0.239 | 0.19 | 1 | HC_vs_MS.Trt_B |
| SH2D3C     | 0.0425  | 0.45488 | 0.2   | 0.16 | 1 | HC_vs_MS.Trt_B |
| RBM10      | 0.04255 | 0.39261 | 0.175 | 0.13 | 1 | HC_vs_MS.Trt_B |

|            |         |         |       |      |   |                |
|------------|---------|---------|-------|------|---|----------------|
| SPRYD3     | 0.04261 | 0.41661 | 0.136 | 0.1  | 1 | HC_vs_MS.Trt_B |
| DFNA5      | 0.04263 | 0.38125 | 0.12  | 0.08 | 1 | HC_vs_MS.Trt_B |
| TIRAP      | 0.04268 | 1.17605 | 0.401 | 0.36 | 1 | HC_vs_MS.Trt_B |
| C3orf49    | 0.04277 | -0.3331 | 0.31  | 0.26 | 1 | HC_vs_MS.Trt_B |
| CCDC152    | 0.04281 | 0.73813 | 0.197 | 0.16 | 1 | HC_vs_MS.Trt_B |
| NCDN       | 0.04291 | 0.46882 | 0.216 | 0.17 | 1 | HC_vs_MS.Trt_B |
| ABC13-4748 | 0.04296 | 0.30299 | 0.117 | 0.08 | 1 | HC_vs_MS.Trt_B |
| THEM4      | 0.04302 | -0.3175 | 0.796 | 0.72 | 1 | HC_vs_MS.Trt_B |
| EIF2S3     | 0.04304 | -0.3223 | 0.954 | 0.94 | 1 | HC_vs_MS.Trt_B |
| PTBP1      | 0.04307 | 0.42863 | 0.209 | 0.16 | 1 | HC_vs_MS.Trt_B |
| TMEM35B    | 0.04311 | -0.307  | 0.152 | 0.11 | 1 | HC_vs_MS.Trt_B |
| DGCR8      | 0.04327 | 1.24055 | 0.116 | 0.08 | 1 | HC_vs_MS.Trt_B |
| USP31      | 0.04328 | -0.3509 | 0.135 | 0.09 | 1 | HC_vs_MS.Trt_B |
| ZNF292     | 0.04343 | -0.3509 | 0.814 | 0.73 | 1 | HC_vs_MS.Trt_B |
| MRE11A     | 0.04356 | -0.6934 | 0.675 | 0.6  | 1 | HC_vs_MS.Trt_B |
| PRSS53     | 0.04363 | 0.33844 | 0.162 | 0.12 | 1 | HC_vs_MS.Trt_B |
| INPP5F     | 0.04393 | 0.54646 | 0.307 | 0.25 | 1 | HC_vs_MS.Trt_B |
| NAF1       | 0.04404 | 0.40253 | 0.409 | 0.33 | 1 | HC_vs_MS.Trt_B |
| MBD6       | 0.04406 | 0.39327 | 0.199 | 0.15 | 1 | HC_vs_MS.Trt_B |
| MRPL57     | 0.04411 | -0.5535 | 0.672 | 0.63 | 1 | HC_vs_MS.Trt_B |
| RAB14      | 0.04417 | 0.44897 | 0.201 | 0.16 | 1 | HC_vs_MS.Trt_B |
| RASSF3     | 0.04419 | -0.6053 | 0.642 | 0.65 | 1 | HC_vs_MS.Trt_B |
| MIB2       | 0.04436 | 1.14817 | 0.177 | 0.14 | 1 | HC_vs_MS.Trt_B |
| TTC3       | 0.04437 | -0.2875 | 0.7   | 0.65 | 1 | HC_vs_MS.Trt_B |
| BRD7       | 0.04446 | -0.9518 | 0.522 | 0.45 | 1 | HC_vs_MS.Trt_B |
| KHDRBS1    | 0.04462 | 0.28673 | 0.183 | 0.14 | 1 | HC_vs_MS.Trt_B |
| RGP1       | 0.04467 | 0.58326 | 0.123 | 0.09 | 1 | HC_vs_MS.Trt_B |
| TRIM61     | 0.04471 | 0.39601 | 0.214 | 0.17 | 1 | HC_vs_MS.Trt_B |
| PDCD4      | 0.04494 | -0.536  | 0.6   | 0.5  | 1 | HC_vs_MS.Trt_B |
| NT5DC1     | 0.04546 | -0.3705 | 0.194 | 0.15 | 1 | HC_vs_MS.Trt_B |
| SEC61A1    | 0.04558 | 0.26418 | 0.299 | 0.25 | 1 | HC_vs_MS.Trt_B |
| PITRM1     | 0.04561 | 0.27622 | 0.172 | 0.13 | 1 | HC_vs_MS.Trt_B |
| FGF23      | 0.04583 | 1.65287 | 0.828 | 0.79 | 1 | HC_vs_MS.Trt_B |
| ARHGAP21   | 0.04604 | 0.73273 | 0.296 | 0.25 | 1 | HC_vs_MS.Trt_B |
| PTOV1      | 0.04612 | 0.49372 | 0.133 | 0.1  | 1 | HC_vs_MS.Trt_B |
| IKBKAP     | 0.04614 | 0.50274 | 0.216 | 0.17 | 1 | HC_vs_MS.Trt_B |
| ITCH       | 0.04651 | -0.2705 | 0.47  | 0.41 | 1 | HC_vs_MS.Trt_B |
| BDH2       | 0.04672 | 0.42907 | 0.183 | 0.14 | 1 | HC_vs_MS.Trt_B |
| GOLGB1     | 0.04672 | -0.4689 | 0.509 | 0.44 | 1 | HC_vs_MS.Trt_B |
| UBASH3B    | 0.04691 | -0.2586 | 0.38  | 0.33 | 1 | HC_vs_MS.Trt_B |

|         |         |         |       |      |   |                |
|---------|---------|---------|-------|------|---|----------------|
| DENND6B | 0.04692 | 0.28166 | 0.259 | 0.22 | 1 | HC_vs_MS.Trt_B |
| UTP18   | 0.04712 | 0.45196 | 0.157 | 0.12 | 1 | HC_vs_MS.Trt_B |
| ZDHHC2  | 0.04724 | -0.5517 | 0.106 | 0.14 | 1 | HC_vs_MS.Trt_B |
| SOS1    | 0.04738 | 0.64713 | 0.157 | 0.12 | 1 | HC_vs_MS.Trt_B |
| DCUN1D5 | 0.04765 | 0.57306 | 0.425 | 0.37 | 1 | HC_vs_MS.Trt_B |
| CMTR1   | 0.04778 | 0.8117  | 0.159 | 0.12 | 1 | HC_vs_MS.Trt_B |
| ITGB5   | 0.04787 | 0.33158 | 0.328 | 0.28 | 1 | HC_vs_MS.Trt_B |
| ZNF267  | 0.04815 | -0.3242 | 0.117 | 0.08 | 1 | HC_vs_MS.Trt_B |
| YPEL2   | 0.04819 | 0.28728 | 0.186 | 0.14 | 1 | HC_vs_MS.Trt_B |
| SBNO2   | 0.04827 | 0.56789 | 0.175 | 0.13 | 1 | HC_vs_MS.Trt_B |
| IL15    | 0.04886 | 0.26806 | 0.357 | 0.31 | 1 | HC_vs_MS.Trt_B |
| ZNF669  | 0.04896 | 0.77352 | 0.514 | 0.47 | 1 | HC_vs_MS.Trt_B |
| EMC8    | 0.04904 | 0.92553 | 0.132 | 0.1  | 1 | HC_vs_MS.Trt_B |
| MFSD4A  | 0.0491  | -0.8292 | 0.475 | 0.42 | 1 | HC_vs_MS.Trt_B |
| HDAC10  | 0.04917 | 0.62339 | 0.123 | 0.09 | 1 | HC_vs_MS.Trt_B |
| ANXA2R  | 0.04944 | -0.3765 | 0.178 | 0.13 | 1 | HC_vs_MS.Trt_B |
| HPCAL1  | 0.04958 | -0.4192 | 0.357 | 0.31 | 1 | HC_vs_MS.Trt_B |
| YDJC    | 0.04973 | -0.3802 | 0.116 | 0.08 | 1 | HC_vs_MS.Trt_B |
| KDM3B   | 0.04982 | 0.45549 | 0.381 | 0.32 | 1 | HC_vs_MS.Trt_B |
| FBXO21  | 0.05003 | 0.46214 | 0.152 | 0.11 | 1 | HC_vs_MS.Trt_B |
| RIT1    | 0.05009 | -0.5935 | 0.388 | 0.33 | 1 | HC_vs_MS.Trt_B |
| CIPC    | 0.05011 | -0.5803 | 0.37  | 0.32 | 1 | HC_vs_MS.Trt_B |
| APPL1   | 0.05014 | -0.29   | 0.414 | 0.36 | 1 | HC_vs_MS.Trt_B |
| NEPRO   | 0.05015 | 0.47156 | 0.194 | 0.15 | 1 | HC_vs_MS.Trt_B |
| RAB43   | 0.05022 | -0.2883 | 0.204 | 0.16 | 1 | HC_vs_MS.Trt_B |
| VAV3    | 0.05025 | -0.5259 | 0.551 | 0.49 | 1 | HC_vs_MS.Trt_B |
| LSM6    | 0.05048 | 0.46896 | 0.13  | 0.09 | 1 | HC_vs_MS.Trt_B |
| DHX33   | 0.05051 | 0.60472 | 0.317 | 0.27 | 1 | HC_vs_MS.Trt_B |
| SAP30BP | 0.05058 | 0.31309 | 0.206 | 0.16 | 1 | HC_vs_MS.Trt_B |
| ZNF417  | 0.05062 | 0.5587  | 0.693 | 0.65 | 1 | HC_vs_MS.Trt_B |
| TMPRSS3 | 0.05108 | -0.3294 | 0.342 | 0.29 | 1 | HC_vs_MS.Trt_B |
| OTUD4   | 0.05113 | -0.2543 | 0.597 | 0.56 | 1 | HC_vs_MS.Trt_B |
| RETSAT  | 0.05114 | -0.5747 | 0.122 | 0.09 | 1 | HC_vs_MS.Trt_B |
| ERLEC1  | 0.05117 | -0.9591 | 0.358 | 0.29 | 1 | HC_vs_MS.Trt_B |
| MAATS1  | 0.05136 | 0.52013 | 0.2   | 0.16 | 1 | HC_vs_MS.Trt_B |
| PPCS    | 0.05165 | -0.6309 | 0.322 | 0.26 | 1 | HC_vs_MS.Trt_B |
| FRS3    | 0.05165 | -1.2449 | 0.32  | 0.27 | 1 | HC_vs_MS.Trt_B |
| SHFM1   | 0.05201 | -0.333  | 0.881 | 0.85 | 1 | HC_vs_MS.Trt_B |
| FAM200B | 0.05229 | -0.2697 | 0.38  | 0.31 | 1 | HC_vs_MS.Trt_B |
| DBNDD1  | 0.05239 | 0.57574 | 0.165 | 0.12 | 1 | HC_vs_MS.Trt_B |

|           |         |         |       |      |   |                |
|-----------|---------|---------|-------|------|---|----------------|
| TEKT2     | 0.05258 | 0.49733 | 0.117 | 0.08 | 1 | HC_vs_MS.Trt_B |
| STK39     | 0.05258 | -0.402  | 0.103 | 0.07 | 1 | HC_vs_MS.Trt_B |
| SAYSD1    | 0.05276 | -0.6587 | 0.17  | 0.13 | 1 | HC_vs_MS.Trt_B |
| BTN3A3    | 0.05281 | 0.27421 | 0.223 | 0.18 | 1 | HC_vs_MS.Trt_B |
| GDI2      | 0.05301 | -0.2903 | 0.386 | 0.32 | 1 | HC_vs_MS.Trt_B |
| PIGW      | 0.05318 | 1.28471 | 0.459 | 0.41 | 1 | HC_vs_MS.Trt_B |
| INVS      | 0.05339 | 0.51133 | 0.135 | 0.1  | 1 | HC_vs_MS.Trt_B |
| ADTRP     | 0.05346 | -0.3999 | 0.323 | 0.27 | 1 | HC_vs_MS.Trt_B |
| ARHGAP11B | 0.05346 | 0.39279 | 0.204 | 0.16 | 1 | HC_vs_MS.Trt_B |
| PIPOX     | 0.0535  | -0.2624 | 0.507 | 0.45 | 1 | HC_vs_MS.Trt_B |
| MRPS22    | 0.05351 | 0.29535 | 0.47  | 0.43 | 1 | HC_vs_MS.Trt_B |
| ACSL4     | 0.05358 | 0.56524 | 0.145 | 0.11 | 1 | HC_vs_MS.Trt_B |
| MLF1      | 0.05359 | -0.526  | 0.293 | 0.25 | 1 | HC_vs_MS.Trt_B |
| FAM102B   | 0.05362 | 0.57747 | 0.171 | 0.13 | 1 | HC_vs_MS.Trt_B |
| SEC22B    | 0.05388 | -0.4151 | 0.801 | 0.74 | 1 | HC_vs_MS.Trt_B |
| ELAC1     | 0.05412 | 0.49159 | 0.439 | 0.39 | 1 | HC_vs_MS.Trt_B |
| COG3      | 0.05416 | 0.4024  | 0.168 | 0.13 | 1 | HC_vs_MS.Trt_B |
| BAK1      | 0.05426 | 0.89255 | 0.103 | 0.07 | 1 | HC_vs_MS.Trt_B |
| API5      | 0.05439 | -0.2858 | 0.235 | 0.19 | 1 | HC_vs_MS.Trt_B |
| COASY     | 0.05455 | 0.83221 | 0.404 | 0.36 | 1 | HC_vs_MS.Trt_B |
| DLD       | 0.05456 | -0.716  | 0.141 | 0.1  | 1 | HC_vs_MS.Trt_B |
| GPR37L1   | 0.05474 | 0.51681 | 0.32  | 0.27 | 1 | HC_vs_MS.Trt_B |
| ACTG2     | 0.05502 | 0.75663 | 0.241 | 0.2  | 1 | HC_vs_MS.Trt_B |
| LPIN2     | 0.0552  | -0.3948 | 0.125 | 0.09 | 1 | HC_vs_MS.Trt_B |
| NIFK      | 0.05534 | -0.5381 | 0.522 | 0.45 | 1 | HC_vs_MS.Trt_B |
| IL13RA1   | 0.05544 | -0.3233 | 0.239 | 0.2  | 1 | HC_vs_MS.Trt_B |
| AP2A1     | 0.05557 | 0.82966 | 0.697 | 0.63 | 1 | HC_vs_MS.Trt_B |
| RNF167    | 0.05572 | 0.27381 | 0.27  | 0.22 | 1 | HC_vs_MS.Trt_B |
| SRM       | 0.05579 | -0.4427 | 0.123 | 0.09 | 1 | HC_vs_MS.Trt_B |
| PAN3      | 0.05591 | -0.9229 | 0.757 | 0.77 | 1 | HC_vs_MS.Trt_B |
| GRTP1     | 0.05598 | 0.50633 | 0.506 | 0.46 | 1 | HC_vs_MS.Trt_B |
| PEX11G    | 0.05605 | 0.35899 | 0.126 | 0.09 | 1 | HC_vs_MS.Trt_B |
| C6orf106  | 0.05642 | -0.3618 | 0.126 | 0.09 | 1 | HC_vs_MS.Trt_B |
| SIPA1     | 0.05652 | 0.46231 | 0.533 | 0.48 | 1 | HC_vs_MS.Trt_B |
| MAPRE1    | 0.05675 | 0.27418 | 0.155 | 0.12 | 1 | HC_vs_MS.Trt_B |
| NRROS     | 0.05679 | 1.11379 | 0.101 | 0.07 | 1 | HC_vs_MS.Trt_B |
| COA4      | 0.05703 | -0.4446 | 0.275 | 0.22 | 1 | HC_vs_MS.Trt_B |
| PHACTR2   | 0.05727 | -0.6834 | 0.481 | 0.41 | 1 | HC_vs_MS.Trt_B |
| RNF38     | 0.05732 | 0.38405 | 0.181 | 0.14 | 1 | HC_vs_MS.Trt_B |
| ADCY9     | 0.05732 | -0.6571 | 0.261 | 0.21 | 1 | HC_vs_MS.Trt_B |

|             |         |         |       |      |   |                |
|-------------|---------|---------|-------|------|---|----------------|
| MVB12B      | 0.05763 | 1.00989 | 0.109 | 0.08 | 1 | HC_vs_MS.Trt_B |
| MTMR12      | 0.05787 | 0.43308 | 0.401 | 0.35 | 1 | HC_vs_MS.Trt_B |
| DYNC1I2     | 0.05801 | 0.55478 | 0.174 | 0.14 | 1 | HC_vs_MS.Trt_B |
| RAB35       | 0.05802 | 0.38204 | 0.116 | 0.08 | 1 | HC_vs_MS.Trt_B |
| RBM42       | 0.05809 | 0.36097 | 0.172 | 0.13 | 1 | HC_vs_MS.Trt_B |
| C20orf194   | 0.05809 | -0.5137 | 0.225 | 0.18 | 1 | HC_vs_MS.Trt_B |
| ZNF142      | 0.05828 | 0.29607 | 0.101 | 0.07 | 1 | HC_vs_MS.Trt_B |
| TAF3        | 0.05829 | 0.28024 | 0.151 | 0.11 | 1 | HC_vs_MS.Trt_B |
| NR2C2       | 0.05841 | -0.3196 | 0.604 | 0.52 | 1 | HC_vs_MS.Trt_B |
| CXCR6       | 0.05848 | 0.60089 | 0.128 | 0.09 | 1 | HC_vs_MS.Trt_B |
| TAF12       | 0.05865 | -0.2976 | 0.128 | 0.09 | 1 | HC_vs_MS.Trt_B |
| CTD-2331H1  | 0.05888 | 0.7281  | 0.186 | 0.14 | 1 | HC_vs_MS.Trt_B |
| ACP6        | 0.05893 | 0.26117 | 0.549 | 0.46 | 1 | HC_vs_MS.Trt_B |
| TMEM259     | 0.05904 | 0.65393 | 0.113 | 0.08 | 1 | HC_vs_MS.Trt_B |
| STAM        | 0.0592  | -0.3632 | 0.371 | 0.31 | 1 | HC_vs_MS.Trt_B |
| PFKP        | 0.05923 | 0.37211 | 0.259 | 0.22 | 1 | HC_vs_MS.Trt_B |
| CTC-454I21. | 0.0593  | 0.31761 | 0.199 | 0.16 | 1 | HC_vs_MS.Trt_B |
| KNG1        | 0.05942 | -0.7735 | 0.187 | 0.14 | 1 | HC_vs_MS.Trt_B |
| LAMTOR4     | 0.05975 | -0.3782 | 0.441 | 0.38 | 1 | HC_vs_MS.Trt_B |
| ARPC2       | 0.05988 | -0.4086 | 0.965 | 0.93 | 1 | HC_vs_MS.Trt_B |
| SESN1       | 0.05995 | 0.3328  | 0.19  | 0.15 | 1 | HC_vs_MS.Trt_B |
| KCTD9       | 0.06025 | 1.08646 | 0.183 | 0.15 | 1 | HC_vs_MS.Trt_B |
| ACADM       | 0.06049 | -0.2571 | 0.18  | 0.14 | 1 | HC_vs_MS.Trt_B |
| TAOK2       | 0.06067 | 0.4681  | 0.103 | 0.07 | 1 | HC_vs_MS.Trt_B |
| HPRT1       | 0.06105 | 0.47286 | 0.12  | 0.09 | 1 | HC_vs_MS.Trt_B |
| SMARCA5     | 0.06109 | -0.3169 | 0.328 | 0.27 | 1 | HC_vs_MS.Trt_B |
| TP53I13     | 0.06121 | 0.38891 | 0.116 | 0.08 | 1 | HC_vs_MS.Trt_B |
| ERMN        | 0.06156 | -0.93   | 0.172 | 0.13 | 1 | HC_vs_MS.Trt_B |
| MGAT5       | 0.06158 | -0.4995 | 0.143 | 0.11 | 1 | HC_vs_MS.Trt_B |
| SLC20A1     | 0.0618  | 0.7722  | 0.142 | 0.11 | 1 | HC_vs_MS.Trt_B |
| ZNF341      | 0.06184 | -0.7213 | 0.371 | 0.31 | 1 | HC_vs_MS.Trt_B |
| FBXO3       | 0.06207 | 0.39094 | 0.291 | 0.25 | 1 | HC_vs_MS.Trt_B |
| PRR29       | 0.06281 | 0.51089 | 0.171 | 0.14 | 1 | HC_vs_MS.Trt_B |
| SULT1A3     | 0.06307 | -0.3142 | 0.606 | 0.55 | 1 | HC_vs_MS.Trt_B |
| NDUFAF7     | 0.06307 | 1.03714 | 0.37  | 0.33 | 1 | HC_vs_MS.Trt_B |
| ZFP41       | 0.06345 | -0.2767 | 0.104 | 0.07 | 1 | HC_vs_MS.Trt_B |
| PSMC3       | 0.06348 | -0.4728 | 0.103 | 0.14 | 1 | HC_vs_MS.Trt_B |
| PDPR        | 0.06354 | 0.31514 | 0.364 | 0.31 | 1 | HC_vs_MS.Trt_B |
| RABAC1      | 0.06391 | -0.5195 | 0.17  | 0.21 | 1 | HC_vs_MS.Trt_B |
| PPM1A       | 0.06402 | 0.59509 | 0.146 | 0.11 | 1 | HC_vs_MS.Trt_B |

|          |         |         |       |      |   |                |
|----------|---------|---------|-------|------|---|----------------|
| SYTL2    | 0.06414 | -0.275  | 0.736 | 0.74 | 1 | HC_vs_MS.Trt_B |
| LRRC34   | 0.06466 | -0.4222 | 0.559 | 0.5  | 1 | HC_vs_MS.Trt_B |
| ARL1     | 0.06494 | 0.4096  | 0.346 | 0.29 | 1 | HC_vs_MS.Trt_B |
| TPRKB    | 0.06498 | -0.3403 | 0.468 | 0.4  | 1 | HC_vs_MS.Trt_B |
| RBM3     | 0.06502 | -0.3417 | 0.803 | 0.72 | 1 | HC_vs_MS.Trt_B |
| TMPRSS7  | 0.06511 | 0.30136 | 0.257 | 0.21 | 1 | HC_vs_MS.Trt_B |
| E2F4     | 0.06522 | 0.78727 | 0.122 | 0.09 | 1 | HC_vs_MS.Trt_B |
| MOSPD1   | 0.0653  | -0.7611 | 0.178 | 0.14 | 1 | HC_vs_MS.Trt_B |
| SLC1A5   | 0.06534 | 0.80525 | 0.152 | 0.12 | 1 | HC_vs_MS.Trt_B |
| IWS1     | 0.06545 | 0.35882 | 0.128 | 0.09 | 1 | HC_vs_MS.Trt_B |
| SRPK1    | 0.06555 | -0.5566 | 0.132 | 0.17 | 1 | HC_vs_MS.Trt_B |
| ZSCAN20  | 0.06556 | 0.73378 | 0.238 | 0.2  | 1 | HC_vs_MS.Trt_B |
| ANKRD13C | 0.06573 | 0.2544  | 0.167 | 0.13 | 1 | HC_vs_MS.Trt_B |
| ZNF254   | 0.06578 | 0.4972  | 0.397 | 0.35 | 1 | HC_vs_MS.Trt_B |
| JMJD4    | 0.0658  | 0.72642 | 0.242 | 0.2  | 1 | HC_vs_MS.Trt_B |
| S1PR4    | 0.06601 | 0.32546 | 0.161 | 0.12 | 1 | HC_vs_MS.Trt_B |
| GGPS1    | 0.06617 | -0.3915 | 0.378 | 0.32 | 1 | HC_vs_MS.Trt_B |
| TCEAL3   | 0.06617 | -0.2888 | 0.11  | 0.08 | 1 | HC_vs_MS.Trt_B |
| FANCF    | 0.06631 | 0.46077 | 0.236 | 0.2  | 1 | HC_vs_MS.Trt_B |
| TMEM97   | 0.06631 | 0.67391 | 0.23  | 0.19 | 1 | HC_vs_MS.Trt_B |
| CYB5B    | 0.06677 | -0.5205 | 0.449 | 0.39 | 1 | HC_vs_MS.Trt_B |
| ZFP82    | 0.06684 | 0.46641 | 0.649 | 0.6  | 1 | HC_vs_MS.Trt_B |
| MYL6B    | 0.06722 | -0.6198 | 0.506 | 0.46 | 1 | HC_vs_MS.Trt_B |
| GEMIN7   | 0.06748 | -0.4006 | 0.213 | 0.17 | 1 | HC_vs_MS.Trt_B |
| INPP4A   | 0.06788 | 0.34776 | 0.33  | 0.28 | 1 | HC_vs_MS.Trt_B |
| KDM6A    | 0.06811 | 0.3647  | 0.242 | 0.2  | 1 | HC_vs_MS.Trt_B |
| SMARCE1  | 0.06825 | -0.7051 | 0.435 | 0.37 | 1 | HC_vs_MS.Trt_B |
| NPIP9    | 0.06828 | 0.40683 | 0.114 | 0.08 | 1 | HC_vs_MS.Trt_B |
| PPIG     | 0.06832 | -0.3278 | 0.312 | 0.25 | 1 | HC_vs_MS.Trt_B |
| SSNA1    | 0.06834 | 0.35805 | 0.129 | 0.1  | 1 | HC_vs_MS.Trt_B |
| PLEKHG4B | 0.06839 | 0.25671 | 0.386 | 0.33 | 1 | HC_vs_MS.Trt_B |
| KIF13A   | 0.06855 | -0.6172 | 0.27  | 0.22 | 1 | HC_vs_MS.Trt_B |
| NCAPD2   | 0.06877 | -0.4058 | 0.403 | 0.34 | 1 | HC_vs_MS.Trt_B |
| ERCC6L   | 0.06891 | 1.51302 | 0.117 | 0.08 | 1 | HC_vs_MS.Trt_B |
| MAZ      | 0.0692  | 0.32771 | 0.138 | 0.1  | 1 | HC_vs_MS.Trt_B |
| DNAH9    | 0.0692  | 0.28273 | 0.436 | 0.39 | 1 | HC_vs_MS.Trt_B |
| MYO7A    | 0.0693  | 0.26056 | 0.278 | 0.23 | 1 | HC_vs_MS.Trt_B |
| IFNLR1   | 0.06973 | 0.35662 | 0.109 | 0.08 | 1 | HC_vs_MS.Trt_B |
| MTSS1    | 0.0699  | -0.9944 | 0.583 | 0.49 | 1 | HC_vs_MS.Trt_B |
| ZNF316   | 0.07021 | -0.5489 | 0.461 | 0.43 | 1 | HC_vs_MS.Trt_B |

|             |         |         |       |      |   |                |
|-------------|---------|---------|-------|------|---|----------------|
| GMMPR2      | 0.07034 | 0.42588 | 0.107 | 0.08 | 1 | HC_vs_MS.Trt_B |
| LIPT2       | 0.07084 | 0.31141 | 0.123 | 0.09 | 1 | HC_vs_MS.Trt_B |
| CRIPAK      | 0.07119 | 0.31691 | 0.21  | 0.17 | 1 | HC_vs_MS.Trt_B |
| OST4        | 0.0719  | -0.3081 | 0.388 | 0.32 | 1 | HC_vs_MS.Trt_B |
| SYNGAP1     | 0.07237 | 0.49779 | 0.136 | 0.1  | 1 | HC_vs_MS.Trt_B |
| CCR6        | 0.07262 | -0.7673 | 0.307 | 0.26 | 1 | HC_vs_MS.Trt_B |
| MFSD11      | 0.07277 | -0.3004 | 0.429 | 0.38 | 1 | HC_vs_MS.Trt_B |
| AXIN1       | 0.07302 | -0.5361 | 0.107 | 0.07 | 1 | HC_vs_MS.Trt_B |
| CPEB4       | 0.07324 | 1.0726  | 0.116 | 0.09 | 1 | HC_vs_MS.Trt_B |
| FARSA       | 0.07337 | 0.29218 | 0.125 | 0.09 | 1 | HC_vs_MS.Trt_B |
| CHMP2A      | 0.0738  | 0.3976  | 0.106 | 0.08 | 1 | HC_vs_MS.Trt_B |
| EIF3E       | 0.07416 | -0.4906 | 0.539 | 0.46 | 1 | HC_vs_MS.Trt_B |
| MAML1       | 0.07423 | 0.44527 | 0.13  | 0.1  | 1 | HC_vs_MS.Trt_B |
| GPD1L       | 0.07435 | -0.7851 | 0.112 | 0.08 | 1 | HC_vs_MS.Trt_B |
| TMEM87B     | 0.07443 | 0.68005 | 0.109 | 0.08 | 1 | HC_vs_MS.Trt_B |
| EPHX1       | 0.07517 | -0.3085 | 0.107 | 0.07 | 1 | HC_vs_MS.Trt_B |
| ZNF76       | 0.07525 | 0.5702  | 0.143 | 0.11 | 1 | HC_vs_MS.Trt_B |
| PSMG4       | 0.07555 | -0.2869 | 0.728 | 0.69 | 1 | HC_vs_MS.Trt_B |
| HNRNPAB     | 0.07589 | 0.61944 | 0.128 | 0.1  | 1 | HC_vs_MS.Trt_B |
| DNAJC28     | 0.07595 | 0.46129 | 0.374 | 0.33 | 1 | HC_vs_MS.Trt_B |
| IARS2       | 0.07643 | 0.46963 | 0.117 | 0.09 | 1 | HC_vs_MS.Trt_B |
| TP53BP2     | 0.0766  | 0.56001 | 0.135 | 0.1  | 1 | HC_vs_MS.Trt_B |
| HID1        | 0.07662 | -1.039  | 0.136 | 0.1  | 1 | HC_vs_MS.Trt_B |
| MCEE        | 0.07668 | -0.4172 | 0.129 | 0.1  | 1 | HC_vs_MS.Trt_B |
| SLFN11      | 0.07703 | 0.67684 | 0.251 | 0.21 | 1 | HC_vs_MS.Trt_B |
| C19orf12    | 0.07727 | 0.62956 | 0.335 | 0.31 | 1 | HC_vs_MS.Trt_B |
| ZNF460      | 0.07742 | 0.75459 | 0.174 | 0.14 | 1 | HC_vs_MS.Trt_B |
| CHCHD3      | 0.07758 | 0.25961 | 0.148 | 0.11 | 1 | HC_vs_MS.Trt_B |
| TMEM140     | 0.07828 | 0.64357 | 0.178 | 0.14 | 1 | HC_vs_MS.Trt_B |
| CTD-2192J10 | 0.07872 | -1.1554 | 0.133 | 0.17 | 1 | HC_vs_MS.Trt_B |
| ANKRD23     | 0.07885 | -0.265  | 0.116 | 0.08 | 1 | HC_vs_MS.Trt_B |
| MCU         | 0.07885 | -0.4971 | 0.246 | 0.2  | 1 | HC_vs_MS.Trt_B |
| FNIP2       | 0.07892 | 0.28808 | 0.296 | 0.25 | 1 | HC_vs_MS.Trt_B |
| CCNT1       | 0.07901 | 0.3584  | 0.116 | 0.09 | 1 | HC_vs_MS.Trt_B |
| TDRD3       | 0.07965 | -0.3825 | 0.519 | 0.47 | 1 | HC_vs_MS.Trt_B |
| CGRRF1      | 0.07966 | -0.7075 | 0.257 | 0.22 | 1 | HC_vs_MS.Trt_B |
| SH3BGRL     | 0.07966 | -0.2543 | 0.328 | 0.27 | 1 | HC_vs_MS.Trt_B |
| ITGB1BP1    | 0.07985 | 0.48835 | 0.141 | 0.11 | 1 | HC_vs_MS.Trt_B |
| CNIH1       | 0.08018 | -0.5197 | 0.132 | 0.1  | 1 | HC_vs_MS.Trt_B |
| CASZ1       | 0.08036 | 0.56168 | 0.193 | 0.16 | 1 | HC_vs_MS.Trt_B |



|            |         |         |       |      |   |                |
|------------|---------|---------|-------|------|---|----------------|
| CEP162     | 0.08045 | -0.7529 | 0.138 | 0.1  | 1 | HC_vs_MS.Trt_B |
| LLGL1      | 0.08048 | 1.06291 | 0.258 | 0.21 | 1 | HC_vs_MS.Trt_B |
| AASDHPPT   | 0.08075 | 0.42903 | 0.123 | 0.09 | 1 | HC_vs_MS.Trt_B |
| ARID2      | 0.08081 | -0.3308 | 0.688 | 0.61 | 1 | HC_vs_MS.Trt_B |
| HINT3      | 0.08118 | 0.2821  | 0.296 | 0.25 | 1 | HC_vs_MS.Trt_B |
| BCDIN3D    | 0.08121 | 0.40394 | 0.316 | 0.28 | 1 | HC_vs_MS.Trt_B |
| ATXN7L3B   | 0.08138 | 0.47396 | 0.162 | 0.13 | 1 | HC_vs_MS.Trt_B |
| FAM32A     | 0.08202 | -0.3189 | 0.436 | 0.38 | 1 | HC_vs_MS.Trt_B |
| PFKFB2     | 0.08229 | 0.36    | 0.2   | 0.16 | 1 | HC_vs_MS.Trt_B |
| SLC25A3    | 0.08261 | -0.3866 | 0.929 | 0.83 | 1 | HC_vs_MS.Trt_B |
| UBALD2     | 0.08268 | -0.5164 | 0.116 | 0.08 | 1 | HC_vs_MS.Trt_B |
| OASL       | 0.08273 | 0.35717 | 0.177 | 0.14 | 1 | HC_vs_MS.Trt_B |
| SLC9A1     | 0.08282 | 0.74463 | 0.204 | 0.17 | 1 | HC_vs_MS.Trt_B |
| SRP54      | 0.08289 | -0.4394 | 0.168 | 0.13 | 1 | HC_vs_MS.Trt_B |
| C14orf1    | 0.08291 | -0.6905 | 0.259 | 0.21 | 1 | HC_vs_MS.Trt_B |
| LRRC8D     | 0.08299 | -0.3508 | 0.148 | 0.11 | 1 | HC_vs_MS.Trt_B |
| BABAM1     | 0.08341 | -0.2614 | 0.607 | 0.54 | 1 | HC_vs_MS.Trt_B |
| ABCB8      | 0.08372 | 0.35678 | 0.533 | 0.51 | 1 | HC_vs_MS.Trt_B |
| RP11-793H1 | 0.08375 | 0.31684 | 0.257 | 0.22 | 1 | HC_vs_MS.Trt_B |
| TM9SF1     | 0.08467 | 0.3172  | 0.232 | 0.19 | 1 | HC_vs_MS.Trt_B |
| DNAJC19    | 0.08506 | -0.2756 | 0.228 | 0.19 | 1 | HC_vs_MS.Trt_B |
| AHRR       | 0.08538 | -0.4809 | 0.113 | 0.08 | 1 | HC_vs_MS.Trt_B |
| MRPL40     | 0.08567 | -0.268  | 0.394 | 0.34 | 1 | HC_vs_MS.Trt_B |
| GANAB      | 0.08587 | 0.56108 | 0.43  | 0.41 | 1 | HC_vs_MS.Trt_B |
| DCTN3      | 0.08623 | -0.591  | 0.361 | 0.31 | 1 | HC_vs_MS.Trt_B |
| CC2D2B     | 0.08646 | 0.48123 | 0.125 | 0.09 | 1 | HC_vs_MS.Trt_B |
| MKRN2OS    | 0.08652 | 0.32072 | 0.187 | 0.15 | 1 | HC_vs_MS.Trt_B |
| ENPP3      | 0.08658 | 0.38551 | 0.13  | 0.1  | 1 | HC_vs_MS.Trt_B |
| STT3A      | 0.08662 | -0.4667 | 0.591 | 0.52 | 1 | HC_vs_MS.Trt_B |
| ACVR2A     | 0.08669 | -0.5049 | 0.225 | 0.18 | 1 | HC_vs_MS.Trt_B |
| BCR        | 0.08696 | -0.7568 | 0.261 | 0.22 | 1 | HC_vs_MS.Trt_B |
| PAQR7      | 0.08739 | 0.31874 | 0.486 | 0.46 | 1 | HC_vs_MS.Trt_B |
| USP40      | 0.0874  | 0.27022 | 0.404 | 0.34 | 1 | HC_vs_MS.Trt_B |
| ADAMTSL4   | 0.08755 | -0.3598 | 0.236 | 0.2  | 1 | HC_vs_MS.Trt_B |
| RHBDD1     | 0.08776 | 0.30385 | 0.317 | 0.28 | 1 | HC_vs_MS.Trt_B |
| ARF3       | 0.0881  | 0.31536 | 0.159 | 0.13 | 1 | HC_vs_MS.Trt_B |
| AP5Z1      | 0.08818 | 0.31127 | 0.143 | 0.11 | 1 | HC_vs_MS.Trt_B |
| EBLN2      | 0.08828 | 0.74831 | 0.114 | 0.09 | 1 | HC_vs_MS.Trt_B |
| TUFT1      | 0.08834 | 0.29599 | 0.349 | 0.31 | 1 | HC_vs_MS.Trt_B |
| TCEAL4     | 0.08857 | 0.28551 | 0.12  | 0.09 | 1 | HC_vs_MS.Trt_B |

|            |         |         |       |      |   |                |
|------------|---------|---------|-------|------|---|----------------|
| RPS7       | 0.08863 | 0.45259 | 0.439 | 0.41 | 1 | HC_vs_MS.Trt_B |
| HMGA1      | 0.08882 | 0.26786 | 0.177 | 0.14 | 1 | HC_vs_MS.Trt_B |
| BRD9       | 0.0889  | -0.2713 | 0.146 | 0.11 | 1 | HC_vs_MS.Trt_B |
| HDDC2      | 0.08894 | 0.26239 | 0.116 | 0.09 | 1 | HC_vs_MS.Trt_B |
| BNC2       | 0.0892  | -0.4842 | 0.128 | 0.09 | 1 | HC_vs_MS.Trt_B |
| CRY2       | 0.08951 | -0.3992 | 0.443 | 0.41 | 1 | HC_vs_MS.Trt_B |
| IP6K2      | 0.08967 | -0.2899 | 0.314 | 0.26 | 1 | HC_vs_MS.Trt_B |
| MAK        | 0.0897  | 0.26272 | 0.17  | 0.14 | 1 | HC_vs_MS.Trt_B |
| SNRPA1     | 0.08983 | -0.6104 | 0.652 | 0.57 | 1 | HC_vs_MS.Trt_B |
| NPTXR      | 0.08998 | -0.2507 | 0.326 | 0.27 | 1 | HC_vs_MS.Trt_B |
| GSR        | 0.08998 | 0.33391 | 0.203 | 0.17 | 1 | HC_vs_MS.Trt_B |
| USO1       | 0.0901  | 0.56382 | 0.133 | 0.1  | 1 | HC_vs_MS.Trt_B |
| MED16      | 0.09015 | -0.2615 | 0.146 | 0.19 | 1 | HC_vs_MS.Trt_B |
| MTERF1     | 0.0904  | 0.43679 | 0.196 | 0.16 | 1 | HC_vs_MS.Trt_B |
| PADI2      | 0.09067 | 0.48631 | 0.217 | 0.18 | 1 | HC_vs_MS.Trt_B |
| VPS11      | 0.09161 | -0.5319 | 0.767 | 0.71 | 1 | HC_vs_MS.Trt_B |
| TRADD      | 0.09161 | -0.6596 | 0.133 | 0.17 | 1 | HC_vs_MS.Trt_B |
| SIRT1      | 0.09246 | -0.5615 | 0.103 | 0.07 | 1 | HC_vs_MS.Trt_B |
| SRPK3      | 0.09266 | -0.261  | 0.257 | 0.21 | 1 | HC_vs_MS.Trt_B |
| SQRDL      | 0.09271 | -0.282  | 0.133 | 0.1  | 1 | HC_vs_MS.Trt_B |
| RDH10      | 0.0935  | -0.9093 | 0.167 | 0.13 | 1 | HC_vs_MS.Trt_B |
| PAEP       | 0.09363 | -0.6981 | 0.393 | 0.35 | 1 | HC_vs_MS.Trt_B |
| GPR108     | 0.09381 | -0.5895 | 0.123 | 0.16 | 1 | HC_vs_MS.Trt_B |
| COA3       | 0.0939  | -1.0673 | 0.075 | 0.1  | 1 | HC_vs_MS.Trt_B |
| PLEC       | 0.09398 | 0.33754 | 0.267 | 0.23 | 1 | HC_vs_MS.Trt_B |
| C12orf75   | 0.09409 | 0.32066 | 0.122 | 0.09 | 1 | HC_vs_MS.Trt_B |
| CORO7-PAM  | 0.09416 | 0.29584 | 0.104 | 0.08 | 1 | HC_vs_MS.Trt_B |
| PHF6       | 0.09417 | -0.3293 | 0.667 | 0.57 | 1 | HC_vs_MS.Trt_B |
| MRPL37     | 0.09427 | -0.5612 | 0.126 | 0.16 | 1 | HC_vs_MS.Trt_B |
| RGPD2      | 0.09434 | -0.318  | 0.159 | 0.12 | 1 | HC_vs_MS.Trt_B |
| TPRA1      | 0.09439 | -0.3584 | 0.152 | 0.12 | 1 | HC_vs_MS.Trt_B |
| RP11-111H1 | 0.09496 | -0.4807 | 0.113 | 0.08 | 1 | HC_vs_MS.Trt_B |
| FAM63A     | 0.09498 | -0.6033 | 0.509 | 0.43 | 1 | HC_vs_MS.Trt_B |
| IRF3       | 0.09515 | -0.2885 | 0.749 | 0.68 | 1 | HC_vs_MS.Trt_B |
| RRM2B      | 0.09549 | -0.4017 | 0.117 | 0.09 | 1 | HC_vs_MS.Trt_B |
| PPP1R3F    | 0.09553 | -0.9552 | 0.128 | 0.09 | 1 | HC_vs_MS.Trt_B |
| EFCAB10    | 0.09569 | -0.3433 | 0.168 | 0.13 | 1 | HC_vs_MS.Trt_B |
| ARL6IP5    | 0.0959  | -0.6119 | 0.578 | 0.6  | 1 | HC_vs_MS.Trt_B |
| FAIM       | 0.096   | -0.5093 | 0.358 | 0.32 | 1 | HC_vs_MS.Trt_B |
| PIGO       | 0.0963  | 0.45665 | 0.342 | 0.3  | 1 | HC_vs_MS.Trt_B |

|           |         |         |       |      |   |                |
|-----------|---------|---------|-------|------|---|----------------|
| HIST1H1D  | 0.09638 | 0.50116 | 0.122 | 0.09 | 1 | HC_vs_MS.Trt_B |
| SNRPG     | 0.09657 | -0.434  | 0.246 | 0.2  | 1 | HC_vs_MS.Trt_B |
| SAMD9L    | 0.09663 | -0.2724 | 0.191 | 0.15 | 1 | HC_vs_MS.Trt_B |
| TGFBR3    | 0.09704 | 0.28607 | 0.388 | 0.34 | 1 | HC_vs_MS.Trt_B |
| ACP1      | 0.09749 | -0.7372 | 0.252 | 0.29 | 1 | HC_vs_MS.Trt_B |
| SCAMP1    | 0.09841 | -0.4454 | 0.442 | 0.4  | 1 | HC_vs_MS.Trt_B |
| TEPSIN    | 0.09859 | 0.52317 | 0.104 | 0.08 | 1 | HC_vs_MS.Trt_B |
| 1-Mar     | 0.09866 | -0.8398 | 0.31  | 0.26 | 1 | HC_vs_MS.Trt_B |
| PGGT1B    | 0.09894 | -0.4437 | 0.158 | 0.12 | 1 | HC_vs_MS.Trt_B |
| SMURF1    | 0.09904 | -0.2932 | 0.103 | 0.07 | 1 | HC_vs_MS.Trt_B |
| CFD       | 0.09935 | 0.84681 | 0.151 | 0.12 | 1 | HC_vs_MS.Trt_B |
| PNPLA2    | 0.09951 | -0.2955 | 0.17  | 0.13 | 1 | HC_vs_MS.Trt_B |
| CLHC1     | 0.10073 | -0.3933 | 0.467 | 0.41 | 1 | HC_vs_MS.Trt_B |
| TAP2      | 0.10081 | 0.49598 | 0.252 | 0.21 | 1 | HC_vs_MS.Trt_B |
| IFFO2     | 0.10148 | 0.51437 | 0.123 | 0.09 | 1 | HC_vs_MS.Trt_B |
| FTSJ1     | 0.10188 | 0.34379 | 0.123 | 0.09 | 1 | HC_vs_MS.Trt_B |
| HIPK1     | 0.102   | 0.44562 | 0.168 | 0.14 | 1 | HC_vs_MS.Trt_B |
| TNFRSF11A | 0.10233 | 0.68131 | 0.228 | 0.19 | 1 | HC_vs_MS.Trt_B |
| PSD3      | 0.10298 | 0.38887 | 0.31  | 0.26 | 1 | HC_vs_MS.Trt_B |
| ATP7A     | 0.10313 | 0.63406 | 0.348 | 0.31 | 1 | HC_vs_MS.Trt_B |
| ALKBH5    | 0.10321 | 0.39464 | 0.123 | 0.09 | 1 | HC_vs_MS.Trt_B |
| GINS2     | 0.10345 | 0.69924 | 0.3   | 0.26 | 1 | HC_vs_MS.Trt_B |
| CDC26     | 0.10396 | -0.6958 | 0.162 | 0.2  | 1 | HC_vs_MS.Trt_B |
| NUP37     | 0.10417 | -1.0973 | 0.275 | 0.24 | 1 | HC_vs_MS.Trt_B |
| AGTPBP1   | 0.10431 | 0.79462 | 0.172 | 0.14 | 1 | HC_vs_MS.Trt_B |
| AGO4      | 0.10439 | -0.5934 | 0.28  | 0.24 | 1 | HC_vs_MS.Trt_B |
| IRAK2     | 0.10456 | -0.2889 | 0.288 | 0.24 | 1 | HC_vs_MS.Trt_B |
| HELQ      | 0.1046  | 0.34464 | 0.132 | 0.1  | 1 | HC_vs_MS.Trt_B |
| TIGD6     | 0.10515 | 0.48168 | 0.188 | 0.15 | 1 | HC_vs_MS.Trt_B |
| RBMX      | 0.1053  | -0.3245 | 0.762 | 0.66 | 1 | HC_vs_MS.Trt_B |
| ADAD2     | 0.1056  | -0.6384 | 0.225 | 0.19 | 1 | HC_vs_MS.Trt_B |
| TMEM39A   | 0.10576 | -0.3392 | 0.117 | 0.09 | 1 | HC_vs_MS.Trt_B |
| CUTA      | 0.10602 | -0.4828 | 0.27  | 0.3  | 1 | HC_vs_MS.Trt_B |
| PHKG1     | 0.10655 | 0.26178 | 0.267 | 0.22 | 1 | HC_vs_MS.Trt_B |
| MYO6      | 0.10674 | -1.2343 | 0.419 | 0.37 | 1 | HC_vs_MS.Trt_B |
| NDUFV2    | 0.10717 | -0.2574 | 0.406 | 0.35 | 1 | HC_vs_MS.Trt_B |
| CCDC174   | 0.10725 | -0.7095 | 0.12  | 0.15 | 1 | HC_vs_MS.Trt_B |
| FMNL3     | 0.10769 | 0.31666 | 0.235 | 0.2  | 1 | HC_vs_MS.Trt_B |
| NSF       | 0.10809 | 0.26597 | 0.197 | 0.16 | 1 | HC_vs_MS.Trt_B |
| ARHGAP9   | 0.10837 | -0.2865 | 0.501 | 0.44 | 1 | HC_vs_MS.Trt_B |

|          |         |         |       |      |   |                |
|----------|---------|---------|-------|------|---|----------------|
| PSENE1   | 0.1084  | 0.30994 | 0.151 | 0.12 | 1 | HC_vs_MS.Trt_B |
| SYNE4    | 0.10848 | 0.40228 | 0.409 | 0.36 | 1 | HC_vs_MS.Trt_B |
| GRIA1    | 0.10851 | -0.3953 | 0.106 | 0.08 | 1 | HC_vs_MS.Trt_B |
| ARPC4    | 0.10852 | -0.4487 | 0.572 | 0.59 | 1 | HC_vs_MS.Trt_B |
| RTN3     | 0.10882 | 0.26534 | 0.128 | 0.1  | 1 | HC_vs_MS.Trt_B |
| GTPBP4   | 0.10926 | 0.47982 | 0.414 | 0.38 | 1 | HC_vs_MS.Trt_B |
| GLUL     | 0.10949 | -0.4729 | 0.158 | 0.12 | 1 | HC_vs_MS.Trt_B |
| KIF2A    | 0.10998 | -0.3374 | 0.306 | 0.26 | 1 | HC_vs_MS.Trt_B |
| SLF1     | 0.1101  | 0.57038 | 0.149 | 0.12 | 1 | HC_vs_MS.Trt_B |
| IL18BP   | 0.11037 | 0.4907  | 0.106 | 0.08 | 1 | HC_vs_MS.Trt_B |
| RBM39    | 0.11052 | -0.3088 | 0.888 | 0.79 | 1 | HC_vs_MS.Trt_B |
| GLTSCR1L | 0.11064 | -0.6869 | 0.149 | 0.12 | 1 | HC_vs_MS.Trt_B |
| ZNF17    | 0.11075 | 0.4626  | 0.277 | 0.24 | 1 | HC_vs_MS.Trt_B |
| DNAJC11  | 0.11108 | 0.26325 | 0.168 | 0.14 | 1 | HC_vs_MS.Trt_B |
| POLR2H   | 0.11121 | -0.3355 | 0.452 | 0.4  | 1 | HC_vs_MS.Trt_B |
| ICAM1    | 0.11123 | -0.5139 | 0.428 | 0.38 | 1 | HC_vs_MS.Trt_B |
| ZNF649   | 0.11147 | 0.26293 | 0.17  | 0.14 | 1 | HC_vs_MS.Trt_B |
| ORC5     | 0.11159 | 0.38294 | 0.239 | 0.2  | 1 | HC_vs_MS.Trt_B |
| CDAN1    | 0.112   | -0.3253 | 0.43  | 0.38 | 1 | HC_vs_MS.Trt_B |
| DISC1    | 0.11204 | 0.4044  | 0.486 | 0.42 | 1 | HC_vs_MS.Trt_B |
| AP5B1    | 0.11205 | 0.93517 | 0.235 | 0.2  | 1 | HC_vs_MS.Trt_B |
| PAK1     | 0.11209 | -0.3249 | 0.155 | 0.12 | 1 | HC_vs_MS.Trt_B |
| MSL2     | 0.11225 | -0.3701 | 0.141 | 0.11 | 1 | HC_vs_MS.Trt_B |
| DUSP1    | 0.11269 | 0.50025 | 0.168 | 0.14 | 1 | HC_vs_MS.Trt_B |
| MRPL16   | 0.1129  | -0.5173 | 0.142 | 0.11 | 1 | HC_vs_MS.Trt_B |
| ARHGAP12 | 0.11291 | -0.4126 | 0.139 | 0.11 | 1 | HC_vs_MS.Trt_B |
| ISCA2    | 0.11302 | -0.6621 | 0.467 | 0.41 | 1 | HC_vs_MS.Trt_B |
| NDUFB8   | 0.11311 | -0.8004 | 0.291 | 0.32 | 1 | HC_vs_MS.Trt_B |
| MRPL46   | 0.11317 | -0.3619 | 0.225 | 0.18 | 1 | HC_vs_MS.Trt_B |
| OTUD5    | 0.11357 | -0.3083 | 0.125 | 0.09 | 1 | HC_vs_MS.Trt_B |
| FBXW8    | 0.11369 | -0.5996 | 0.257 | 0.22 | 1 | HC_vs_MS.Trt_B |
| RNF144B  | 0.11382 | -0.2503 | 0.293 | 0.25 | 1 | HC_vs_MS.Trt_B |
| POP5     | 0.11384 | -0.7751 | 0.623 | 0.55 | 1 | HC_vs_MS.Trt_B |
| PPP1R21  | 0.11414 | 0.5154  | 0.203 | 0.17 | 1 | HC_vs_MS.Trt_B |
| PDCD2    | 0.11437 | 0.32508 | 0.106 | 0.08 | 1 | HC_vs_MS.Trt_B |
| SLC22A18 | 0.11438 | 0.50144 | 0.503 | 0.45 | 1 | HC_vs_MS.Trt_B |
| ANKRD49  | 0.11445 | -0.6939 | 0.157 | 0.19 | 1 | HC_vs_MS.Trt_B |
| TNFRSF4  | 0.11446 | 0.38196 | 0.103 | 0.08 | 1 | HC_vs_MS.Trt_B |
| FANCI    | 0.11447 | 0.92608 | 0.52  | 0.5  | 1 | HC_vs_MS.Trt_B |
| NRDE2    | 0.1145  | -0.3062 | 0.739 | 0.7  | 1 | HC_vs_MS.Trt_B |

|             |         |         |       |      |   |                |
|-------------|---------|---------|-------|------|---|----------------|
| USP16       | 0.11497 | -0.4554 | 0.449 | 0.41 | 1 | HC_vs_MS.Trt_B |
| NAA20       | 0.11501 | -0.4405 | 0.104 | 0.14 | 1 | HC_vs_MS.Trt_B |
| DIAPH3      | 0.11574 | 0.26017 | 0.329 | 0.29 | 1 | HC_vs_MS.Trt_B |
| TMEM167A    | 0.11601 | -0.6186 | 0.329 | 0.28 | 1 | HC_vs_MS.Trt_B |
| CD2AP       | 0.11609 | 0.35501 | 0.17  | 0.14 | 1 | HC_vs_MS.Trt_B |
| ACO2        | 0.11634 | 0.30486 | 0.12  | 0.09 | 1 | HC_vs_MS.Trt_B |
| C1orf109    | 0.11667 | 0.2708  | 0.868 | 0.82 | 1 | HC_vs_MS.Trt_B |
| TIMP2       | 0.11681 | -0.3346 | 0.165 | 0.13 | 1 | HC_vs_MS.Trt_B |
| CKS1B       | 0.11744 | -0.6106 | 0.186 | 0.15 | 1 | HC_vs_MS.Trt_B |
| AGAP4       | 0.11767 | -0.6446 | 0.21  | 0.17 | 1 | HC_vs_MS.Trt_B |
| TAF13       | 0.11779 | -0.3566 | 0.116 | 0.09 | 1 | HC_vs_MS.Trt_B |
| AGPS        | 0.1182  | 0.66528 | 0.119 | 0.09 | 1 | HC_vs_MS.Trt_B |
| SSRP1       | 0.11845 | 0.91611 | 0.113 | 0.09 | 1 | HC_vs_MS.Trt_B |
| CST7        | 0.11861 | -0.6031 | 0.084 | 0.11 | 1 | HC_vs_MS.Trt_B |
| RP11-894J14 | 0.11878 | 0.51418 | 0.112 | 0.08 | 1 | HC_vs_MS.Trt_B |
| SLC2A13     | 0.11902 | -0.3317 | 0.309 | 0.27 | 1 | HC_vs_MS.Trt_B |
| MT-CO3      | 0.11918 | -0.6362 | 0.597 | 0.59 | 1 | HC_vs_MS.Trt_B |
| VPS37A      | 0.1193  | 0.65348 | 0.133 | 0.11 | 1 | HC_vs_MS.Trt_B |
| BROX        | 0.11985 | -0.2801 | 0.567 | 0.52 | 1 | HC_vs_MS.Trt_B |
| CDK16       | 0.12177 | 0.72537 | 0.113 | 0.09 | 1 | HC_vs_MS.Trt_B |
| DNPH1       | 0.12227 | -0.7431 | 0.104 | 0.13 | 1 | HC_vs_MS.Trt_B |
| RAD23A      | 0.12228 | -0.4601 | 0.719 | 0.68 | 1 | HC_vs_MS.Trt_B |
| TNFSF4      | 0.12229 | -0.7432 | 0.122 | 0.09 | 1 | HC_vs_MS.Trt_B |
| PRPF31      | 0.12324 | 0.48494 | 0.125 | 0.1  | 1 | HC_vs_MS.Trt_B |
| NEUROD2     | 0.1234  | 0.97527 | 0.188 | 0.23 | 1 | HC_vs_MS.Trt_B |
| HSPG2       | 0.12424 | 0.51893 | 0.335 | 0.31 | 1 | HC_vs_MS.Trt_B |
| EHBP1L1     | 0.1257  | 0.67895 | 0.184 | 0.16 | 1 | HC_vs_MS.Trt_B |
| IL24        | 0.12573 | -0.6412 | 0.106 | 0.14 | 1 | HC_vs_MS.Trt_B |
| FAM46C      | 0.12588 | 0.38572 | 0.158 | 0.13 | 1 | HC_vs_MS.Trt_B |
| CXADR       | 0.1259  | 0.44441 | 0.281 | 0.24 | 1 | HC_vs_MS.Trt_B |
| LEPR        | 0.12629 | 0.26505 | 0.283 | 0.24 | 1 | HC_vs_MS.Trt_B |
| DIRC1       | 0.12669 | -0.3625 | 0.174 | 0.14 | 1 | HC_vs_MS.Trt_B |
| RPLP1       | 0.12729 | -0.254  | 0.948 | 0.9  | 1 | HC_vs_MS.Trt_B |
| TPP1        | 0.12757 | -0.4707 | 0.306 | 0.27 | 1 | HC_vs_MS.Trt_B |
| PATL1       | 0.12817 | 0.34581 | 0.133 | 0.11 | 1 | HC_vs_MS.Trt_B |
| GCN1        | 0.12922 | 0.34704 | 0.171 | 0.14 | 1 | HC_vs_MS.Trt_B |
| FAM135A     | 0.12943 | -0.6101 | 0.404 | 0.35 | 1 | HC_vs_MS.Trt_B |
| HIGD1A      | 0.13015 | -0.4105 | 0.148 | 0.12 | 1 | HC_vs_MS.Trt_B |
| ZNF181      | 0.13043 | 0.55531 | 0.157 | 0.13 | 1 | HC_vs_MS.Trt_B |
| TCTEX1D2    | 0.13103 | -0.4286 | 0.27  | 0.23 | 1 | HC_vs_MS.Trt_B |

|          |         |         |       |      |   |                |
|----------|---------|---------|-------|------|---|----------------|
| MT-ND6   | 0.13163 | -0.3278 | 0.654 | 0.68 | 1 | HC_vs_MS.Trt_B |
| UBA2     | 0.1318  | -0.3701 | 0.513 | 0.46 | 1 | HC_vs_MS.Trt_B |
| PELI1    | 0.13181 | 0.49074 | 0.172 | 0.14 | 1 | HC_vs_MS.Trt_B |
| OFD1     | 0.13221 | 0.26505 | 0.246 | 0.22 | 1 | HC_vs_MS.Trt_B |
| SGF29    | 0.13365 | -0.696  | 0.271 | 0.22 | 1 | HC_vs_MS.Trt_B |
| NBPF11   | 0.134   | 0.39978 | 0.257 | 0.22 | 1 | HC_vs_MS.Trt_B |
| AK6      | 0.13635 | -0.3148 | 0.184 | 0.16 | 1 | HC_vs_MS.Trt_B |
| AAGAB    | 0.13667 | 0.30416 | 0.113 | 0.09 | 1 | HC_vs_MS.Trt_B |
| MBD1     | 0.13693 | -0.6591 | 0.138 | 0.17 | 1 | HC_vs_MS.Trt_B |
| BCL2L1   | 0.13716 | 0.296   | 0.123 | 0.1  | 1 | HC_vs_MS.Trt_B |
| GNB1L    | 0.13754 | -0.4671 | 0.183 | 0.15 | 1 | HC_vs_MS.Trt_B |
| MEMO1    | 0.138   | -0.2545 | 0.301 | 0.27 | 1 | HC_vs_MS.Trt_B |
| XPOT     | 0.1388  | -0.3494 | 0.432 | 0.38 | 1 | HC_vs_MS.Trt_B |
| ITGAX    | 0.13931 | -0.2513 | 0.471 | 0.41 | 1 | HC_vs_MS.Trt_B |
| FAM200A  | 0.13952 | -0.291  | 0.207 | 0.17 | 1 | HC_vs_MS.Trt_B |
| REEP3    | 0.13964 | -1.248  | 0.429 | 0.38 | 1 | HC_vs_MS.Trt_B |
| SC5D     | 0.13968 | -0.2856 | 0.517 | 0.47 | 1 | HC_vs_MS.Trt_B |
| PIN4     | 0.1397  | 0.43532 | 0.117 | 0.09 | 1 | HC_vs_MS.Trt_B |
| RFC4     | 0.14062 | -0.2947 | 0.228 | 0.19 | 1 | HC_vs_MS.Trt_B |
| DIEXF    | 0.14079 | 0.66413 | 0.461 | 0.43 | 1 | HC_vs_MS.Trt_B |
| MAP2K3   | 0.1417  | 0.3594  | 0.116 | 0.09 | 1 | HC_vs_MS.Trt_B |
| NIPA2    | 0.14174 | -0.3836 | 0.091 | 0.12 | 1 | HC_vs_MS.Trt_B |
| CHD9     | 0.14175 | -0.3363 | 0.345 | 0.31 | 1 | HC_vs_MS.Trt_B |
| TTC7A    | 0.14223 | 0.32785 | 0.164 | 0.13 | 1 | HC_vs_MS.Trt_B |
| NCLN     | 0.14224 | 0.44812 | 0.122 | 0.1  | 1 | HC_vs_MS.Trt_B |
| OAZ1     | 0.14236 | -0.3319 | 0.796 | 0.76 | 1 | HC_vs_MS.Trt_B |
| DNAJB7   | 0.14262 | 0.3753  | 0.225 | 0.19 | 1 | HC_vs_MS.Trt_B |
| AFTPH    | 0.14316 | 0.43307 | 0.162 | 0.13 | 1 | HC_vs_MS.Trt_B |
| TSN      | 0.14342 | -0.7047 | 0.329 | 0.27 | 1 | HC_vs_MS.Trt_B |
| TMEM69   | 0.14344 | -0.2797 | 0.197 | 0.16 | 1 | HC_vs_MS.Trt_B |
| NOL10    | 0.14368 | 0.56572 | 0.133 | 0.11 | 1 | HC_vs_MS.Trt_B |
| VPS9D1   | 0.1448  | -0.7964 | 0.226 | 0.19 | 1 | HC_vs_MS.Trt_B |
| PPIL4    | 0.14498 | -0.3956 | 0.223 | 0.19 | 1 | HC_vs_MS.Trt_B |
| CDC42SE2 | 0.14595 | -0.2862 | 0.855 | 0.76 | 1 | HC_vs_MS.Trt_B |
| ZC3H3    | 0.14639 | 0.51306 | 0.125 | 0.1  | 1 | HC_vs_MS.Trt_B |
| CRIP2    | 0.1475  | 0.39432 | 0.12  | 0.1  | 1 | HC_vs_MS.Trt_B |
| PBX4     | 0.14922 | 0.27897 | 0.11  | 0.09 | 1 | HC_vs_MS.Trt_B |
| CYB5D1   | 0.1495  | 1.21177 | 0.138 | 0.11 | 1 | HC_vs_MS.Trt_B |
| UQCRC1   | 0.14967 | -0.6255 | 0.184 | 0.21 | 1 | HC_vs_MS.Trt_B |
| CPEB1    | 0.14987 | 0.28633 | 0.146 | 0.12 | 1 | HC_vs_MS.Trt_B |

|           |         |         |       |      |   |                |
|-----------|---------|---------|-------|------|---|----------------|
| TDRD1     | 0.15009 | 0.32151 | 0.168 | 0.14 | 1 | HC_vs_MS.Trt_B |
| SLC41A1   | 0.15048 | 0.33347 | 0.103 | 0.08 | 1 | HC_vs_MS.Trt_B |
| SULT1A2   | 0.15134 | 0.33182 | 0.159 | 0.13 | 1 | HC_vs_MS.Trt_B |
| PITHD1    | 0.15135 | 0.28057 | 0.145 | 0.12 | 1 | HC_vs_MS.Trt_B |
| ARID5A    | 0.15205 | -0.3118 | 0.19  | 0.16 | 1 | HC_vs_MS.Trt_B |
| CBWD7     | 0.15237 | -0.3838 | 0.401 | 0.38 | 1 | HC_vs_MS.Trt_B |
| AGRN      | 0.15323 | 0.34024 | 0.335 | 0.31 | 1 | HC_vs_MS.Trt_B |
| RFXANK    | 0.15339 | -0.595  | 0.242 | 0.2  | 1 | HC_vs_MS.Trt_B |
| GBF1      | 0.15421 | 0.3879  | 0.148 | 0.12 | 1 | HC_vs_MS.Trt_B |
| EMC7      | 0.15422 | -0.6038 | 0.12  | 0.15 | 1 | HC_vs_MS.Trt_B |
| C1orf174  | 0.15465 | -0.2893 | 0.501 | 0.46 | 1 | HC_vs_MS.Trt_B |
| PSMD11    | 0.15585 | -0.4357 | 0.483 | 0.44 | 1 | HC_vs_MS.Trt_B |
| NELFCD    | 0.15593 | 0.28863 | 0.519 | 0.49 | 1 | HC_vs_MS.Trt_B |
| ATP6V1B2  | 0.15641 | -0.7824 | 0.594 | 0.52 | 1 | HC_vs_MS.Trt_B |
| CHP1      | 0.15685 | -0.6738 | 0.754 | 0.68 | 1 | HC_vs_MS.Trt_B |
| NDUFB1    | 0.15764 | -0.397  | 0.73  | 0.65 | 1 | HC_vs_MS.Trt_B |
| PYROXD2   | 0.15779 | -0.2515 | 0.146 | 0.12 | 1 | HC_vs_MS.Trt_B |
| SLC48A1   | 0.15781 | -0.7915 | 0.583 | 0.54 | 1 | HC_vs_MS.Trt_B |
| HIST1H2BE | 0.15888 | 0.48144 | 0.265 | 0.22 | 1 | HC_vs_MS.Trt_B |
| LAMB1     | 0.15899 | -0.8514 | 0.239 | 0.2  | 1 | HC_vs_MS.Trt_B |
| RBM6      | 0.15923 | -0.3228 | 0.832 | 0.77 | 1 | HC_vs_MS.Trt_B |
| NUP153    | 0.15989 | -0.3836 | 0.159 | 0.13 | 1 | HC_vs_MS.Trt_B |
| TAF15     | 0.16013 | 0.39733 | 0.172 | 0.14 | 1 | HC_vs_MS.Trt_B |
| ERV3-1    | 0.16025 | 0.51228 | 0.484 | 0.44 | 1 | HC_vs_MS.Trt_B |
| ITIH4     | 0.1603  | 0.83895 | 0.201 | 0.17 | 1 | HC_vs_MS.Trt_B |
| NDUFB11   | 0.16037 | -0.3317 | 0.228 | 0.19 | 1 | HC_vs_MS.Trt_B |
| NME9      | 0.16044 | 0.79941 | 0.201 | 0.17 | 1 | HC_vs_MS.Trt_B |
| TCAIM     | 0.16049 | -0.9322 | 0.184 | 0.15 | 1 | HC_vs_MS.Trt_B |
| VPS72     | 0.16056 | -0.2557 | 0.117 | 0.09 | 1 | HC_vs_MS.Trt_B |
| MAP3K14   | 0.16104 | 0.34296 | 0.141 | 0.11 | 1 | HC_vs_MS.Trt_B |
| DDX21     | 0.16197 | 0.35267 | 0.236 | 0.2  | 1 | HC_vs_MS.Trt_B |
| CD74      | 0.16199 | -0.4908 | 0.694 | 0.7  | 1 | HC_vs_MS.Trt_B |
| GNAS      | 0.16203 | -0.2922 | 0.435 | 0.38 | 1 | HC_vs_MS.Trt_B |
| KIFAP3    | 0.16295 | 0.71531 | 0.141 | 0.12 | 1 | HC_vs_MS.Trt_B |
| SLC23A2   | 0.16336 | -0.2588 | 0.13  | 0.11 | 1 | HC_vs_MS.Trt_B |
| FAHD2A    | 0.16366 | 0.52788 | 0.154 | 0.13 | 1 | HC_vs_MS.Trt_B |
| CAPNS1    | 0.16436 | -0.4998 | 0.259 | 0.22 | 1 | HC_vs_MS.Trt_B |
| RNF2      | 0.16473 | 0.26986 | 0.367 | 0.33 | 1 | HC_vs_MS.Trt_B |
| KLHL18    | 0.16489 | 0.29768 | 0.314 | 0.28 | 1 | HC_vs_MS.Trt_B |
| EXOGL     | 0.16525 | 0.3438  | 0.475 | 0.45 | 1 | HC_vs_MS.Trt_B |

|           |         |         |       |      |   |                |
|-----------|---------|---------|-------|------|---|----------------|
| YPEL5     | 0.16529 | -0.5554 | 0.175 | 0.14 | 1 | HC_vs_MS.Trt_B |
| CD47      | 0.16554 | -0.3648 | 0.912 | 0.85 | 1 | HC_vs_MS.Trt_B |
| PPP2R5D   | 0.16582 | 0.31512 | 0.148 | 0.12 | 1 | HC_vs_MS.Trt_B |
| LRIG1     | 0.16631 | 0.40235 | 0.238 | 0.21 | 1 | HC_vs_MS.Trt_B |
| NAPB      | 0.16729 | 0.44833 | 0.403 | 0.37 | 1 | HC_vs_MS.Trt_B |
| CNOT9     | 0.16729 | -0.35   | 0.72  | 0.66 | 1 | HC_vs_MS.Trt_B |
| ZFP37     | 0.16758 | -0.4693 | 0.328 | 0.3  | 1 | HC_vs_MS.Trt_B |
| NAPRT     | 0.16792 | -0.2621 | 0.138 | 0.11 | 1 | HC_vs_MS.Trt_B |
| SLC39A11  | 0.16824 | -0.6436 | 0.251 | 0.21 | 1 | HC_vs_MS.Trt_B |
| PCMT1     | 0.16879 | 0.27109 | 0.174 | 0.15 | 1 | HC_vs_MS.Trt_B |
| FAM234A   | 0.16888 | -0.2867 | 0.196 | 0.16 | 1 | HC_vs_MS.Trt_B |
| ATP5G2    | 0.16923 | -0.4405 | 0.852 | 0.76 | 1 | HC_vs_MS.Trt_B |
| SLC25A36  | 0.16944 | 0.53192 | 0.129 | 0.1  | 1 | HC_vs_MS.Trt_B |
| VAMP1     | 0.16974 | 0.26229 | 0.145 | 0.12 | 1 | HC_vs_MS.Trt_B |
| XRCC5     | 0.17035 | -0.2971 | 0.487 | 0.43 | 1 | HC_vs_MS.Trt_B |
| GALNT15   | 0.17092 | 0.83909 | 0.271 | 0.24 | 1 | HC_vs_MS.Trt_B |
| BRD4      | 0.17126 | 0.32813 | 0.351 | 0.32 | 1 | HC_vs_MS.Trt_B |
| MAN1A2    | 0.17184 | 0.25056 | 0.248 | 0.21 | 1 | HC_vs_MS.Trt_B |
| KCTD13    | 0.17193 | 0.38334 | 0.135 | 0.11 | 1 | HC_vs_MS.Trt_B |
| KIF21B    | 0.17203 | -0.3183 | 0.378 | 0.33 | 1 | HC_vs_MS.Trt_B |
| PHF1      | 0.17288 | 0.31598 | 0.138 | 0.11 | 1 | HC_vs_MS.Trt_B |
| LRRN2     | 0.1738  | 1.18731 | 0.23  | 0.2  | 1 | HC_vs_MS.Trt_B |
| TMEM223   | 0.174   | 0.32533 | 0.133 | 0.11 | 1 | HC_vs_MS.Trt_B |
| ERCC2     | 0.17532 | -0.4944 | 0.465 | 0.43 | 1 | HC_vs_MS.Trt_B |
| USP6      | 0.17535 | -0.3048 | 0.128 | 0.1  | 1 | HC_vs_MS.Trt_B |
| EXOC1     | 0.17597 | -0.6379 | 0.164 | 0.14 | 1 | HC_vs_MS.Trt_B |
| CASP7     | 0.17655 | 0.63871 | 0.125 | 0.1  | 1 | HC_vs_MS.Trt_B |
| C7orf50   | 0.17724 | -0.3774 | 0.332 | 0.29 | 1 | HC_vs_MS.Trt_B |
| TAF2      | 0.17761 | -0.2531 | 0.43  | 0.38 | 1 | HC_vs_MS.Trt_B |
| LINC00094 | 0.17764 | -0.4667 | 0.457 | 0.4  | 1 | HC_vs_MS.Trt_B |
| SRRD      | 0.17805 | -0.4784 | 0.37  | 0.32 | 1 | HC_vs_MS.Trt_B |
| DAZAP2    | 0.17873 | -0.4099 | 0.864 | 0.82 | 1 | HC_vs_MS.Trt_B |
| PRMT8     | 0.17892 | -0.6673 | 0.201 | 0.17 | 1 | HC_vs_MS.Trt_B |
| YPEL1     | 0.17934 | 0.35545 | 0.414 | 0.37 | 1 | HC_vs_MS.Trt_B |
| SLC38A10  | 0.18013 | 0.48527 | 0.304 | 0.28 | 1 | HC_vs_MS.Trt_B |
| PKIA      | 0.1806  | -0.2758 | 0.104 | 0.08 | 1 | HC_vs_MS.Trt_B |
| MAP3K5    | 0.18089 | -0.3865 | 0.209 | 0.17 | 1 | HC_vs_MS.Trt_B |
| PRKAG2    | 0.18116 | -0.4792 | 0.299 | 0.26 | 1 | HC_vs_MS.Trt_B |
| MRPS9     | 0.1814  | -0.7678 | 0.087 | 0.11 | 1 | HC_vs_MS.Trt_B |
| TJP3      | 0.18193 | 0.39302 | 0.103 | 0.08 | 1 | HC_vs_MS.Trt_B |



|          |         |         |       |      |   |                |
|----------|---------|---------|-------|------|---|----------------|
| IL20RB   | 0.18212 | 0.33769 | 0.229 | 0.19 | 1 | HC_vs_MS.Trt_B |
| PIP5K1B  | 0.18266 | 0.44316 | 0.116 | 0.09 | 1 | HC_vs_MS.Trt_B |
| CEACAM21 | 0.18288 | -0.4089 | 0.37  | 0.32 | 1 | HC_vs_MS.Trt_B |
| LANCL3   | 0.18291 | -0.3794 | 0.259 | 0.22 | 1 | HC_vs_MS.Trt_B |
| C5orf24  | 0.18311 | 0.51673 | 0.342 | 0.3  | 1 | HC_vs_MS.Trt_B |
| MCRIP1   | 0.18365 | -0.4167 | 0.381 | 0.35 | 1 | HC_vs_MS.Trt_B |
| GORASP2  | 0.18395 | 0.25572 | 0.155 | 0.13 | 1 | HC_vs_MS.Trt_B |
| ZFP36L1  | 0.18504 | -0.3609 | 0.701 | 0.7  | 1 | HC_vs_MS.Trt_B |
| CTNS     | 0.1853  | 0.3126  | 0.106 | 0.08 | 1 | HC_vs_MS.Trt_B |
| CRIM1    | 0.18577 | -0.5894 | 0.139 | 0.12 | 1 | HC_vs_MS.Trt_B |
| TIPRL    | 0.18581 | -0.3054 | 0.281 | 0.24 | 1 | HC_vs_MS.Trt_B |
| STEAP3   | 0.18634 | 0.37898 | 0.116 | 0.09 | 1 | HC_vs_MS.Trt_B |
| KCTD11   | 0.18697 | -0.4109 | 0.149 | 0.12 | 1 | HC_vs_MS.Trt_B |
| MRPL51   | 0.18757 | -0.6984 | 0.083 | 0.11 | 1 | HC_vs_MS.Trt_B |
| BCOR     | 0.18765 | -0.3761 | 0.112 | 0.09 | 1 | HC_vs_MS.Trt_B |
| TTC28    | 0.18815 | 0.51301 | 0.325 | 0.29 | 1 | HC_vs_MS.Trt_B |
| SMN2     | 0.18824 | -0.3459 | 0.807 | 0.8  | 1 | HC_vs_MS.Trt_B |
| SAMD9    | 0.18838 | 0.30914 | 0.183 | 0.16 | 1 | HC_vs_MS.Trt_B |
| MIGA2    | 0.18843 | -0.5069 | 0.399 | 0.37 | 1 | HC_vs_MS.Trt_B |
| ATP2B1   | 0.18851 | -0.2593 | 0.368 | 0.33 | 1 | HC_vs_MS.Trt_B |
| ATG12    | 0.1887  | -0.452  | 0.696 | 0.65 | 1 | HC_vs_MS.Trt_B |
| SYTL3    | 0.18882 | -0.2794 | 0.122 | 0.1  | 1 | HC_vs_MS.Trt_B |
| PER2     | 0.18885 | -0.3931 | 0.452 | 0.4  | 1 | HC_vs_MS.Trt_B |
| A2M      | 0.18888 | -0.6486 | 0.126 | 0.16 | 1 | HC_vs_MS.Trt_B |
| GNE      | 0.19147 | 0.5269  | 0.193 | 0.16 | 1 | HC_vs_MS.Trt_B |
| MXD4     | 0.19155 | -0.2756 | 0.123 | 0.1  | 1 | HC_vs_MS.Trt_B |
| PYGB     | 0.1919  | 0.67639 | 0.101 | 0.08 | 1 | HC_vs_MS.Trt_B |
| RUNX2    | 0.19259 | 0.34113 | 0.151 | 0.12 | 1 | HC_vs_MS.Trt_B |
| ZNF418   | 0.193   | 0.58284 | 0.172 | 0.14 | 1 | HC_vs_MS.Trt_B |
| F2RL2    | 0.19327 | 0.41194 | 0.229 | 0.2  | 1 | HC_vs_MS.Trt_B |
| SHH      | 0.19378 | 1.42188 | 0.106 | 0.08 | 1 | HC_vs_MS.Trt_B |
| RFWD2    | 0.194   | -0.5648 | 0.291 | 0.27 | 1 | HC_vs_MS.Trt_B |
| C11orf98 | 0.19434 | -0.6362 | 0.103 | 0.13 | 1 | HC_vs_MS.Trt_B |
| ARF5     | 0.19482 | -0.4282 | 0.196 | 0.16 | 1 | HC_vs_MS.Trt_B |
| BAG4     | 0.19486 | -0.4074 | 0.141 | 0.11 | 1 | HC_vs_MS.Trt_B |
| TNFSF13B | 0.19605 | -0.7607 | 0.5   | 0.45 | 1 | HC_vs_MS.Trt_B |
| EIF3CL   | 0.19614 | 0.30435 | 0.167 | 0.14 | 1 | HC_vs_MS.Trt_B |
| LPAR4    | 0.19697 | 0.65261 | 0.132 | 0.11 | 1 | HC_vs_MS.Trt_B |
| EEA1     | 0.19726 | 0.32459 | 0.181 | 0.16 | 1 | HC_vs_MS.Trt_B |
| APOBEC3C | 0.1984  | -0.4505 | 0.642 | 0.61 | 1 | HC_vs_MS.Trt_B |

|            |         |         |       |      |   |                |
|------------|---------|---------|-------|------|---|----------------|
| JTB        | 0.19846 | -0.4516 | 0.21  | 0.17 | 1 | HC_vs_MS.Trt_B |
| NPIPA7     | 0.19857 | -0.4156 | 0.154 | 0.12 | 1 | HC_vs_MS.Trt_B |
| TNS2       | 0.1988  | 0.27467 | 0.291 | 0.26 | 1 | HC_vs_MS.Trt_B |
| NFYB       | 0.19906 | -0.9157 | 0.235 | 0.21 | 1 | HC_vs_MS.Trt_B |
| TRIM39     | 0.19915 | 0.65311 | 0.112 | 0.09 | 1 | HC_vs_MS.Trt_B |
| USMG5      | 0.19917 | -0.4601 | 0.188 | 0.16 | 1 | HC_vs_MS.Trt_B |
| C1orf228   | 0.20011 | -0.2552 | 0.242 | 0.21 | 1 | HC_vs_MS.Trt_B |
| BEX4       | 0.20079 | 0.48822 | 0.103 | 0.08 | 1 | HC_vs_MS.Trt_B |
| ANK1       | 0.20172 | -1.1388 | 0.225 | 0.19 | 1 | HC_vs_MS.Trt_B |
| RP11-500M8 | 0.20529 | -1.2132 | 0.083 | 0.1  | 1 | HC_vs_MS.Trt_B |
| KANK3      | 0.20563 | 0.39394 | 0.201 | 0.24 | 1 | HC_vs_MS.Trt_B |
| FOSB       | 0.20582 | 0.5148  | 0.186 | 0.16 | 1 | HC_vs_MS.Trt_B |
| TFEB       | 0.20642 | 0.60783 | 0.404 | 0.39 | 1 | HC_vs_MS.Trt_B |
| EIF2B1     | 0.20704 | -0.3126 | 0.329 | 0.29 | 1 | HC_vs_MS.Trt_B |
| MTERF3     | 0.20743 | -0.8428 | 0.18  | 0.15 | 1 | HC_vs_MS.Trt_B |
| SMAD1      | 0.20795 | 0.69436 | 0.32  | 0.29 | 1 | HC_vs_MS.Trt_B |
| VPS54      | 0.20798 | -0.6258 | 0.374 | 0.33 | 1 | HC_vs_MS.Trt_B |
| RP11-574F2 | 0.20834 | 0.2515  | 0.154 | 0.13 | 1 | HC_vs_MS.Trt_B |
| TPX2       | 0.20847 | 1.05916 | 0.181 | 0.15 | 1 | HC_vs_MS.Trt_B |
| SLC16A6    | 0.20848 | -0.6227 | 0.242 | 0.21 | 1 | HC_vs_MS.Trt_B |
| THYN1      | 0.20911 | -0.6697 | 0.13  | 0.16 | 1 | HC_vs_MS.Trt_B |
| MTMR2      | 0.20911 | 0.43556 | 0.158 | 0.13 | 1 | HC_vs_MS.Trt_B |
| TBC1D23    | 0.20922 | -0.5679 | 0.114 | 0.09 | 1 | HC_vs_MS.Trt_B |
| STX12      | 0.20939 | 0.36185 | 0.184 | 0.16 | 1 | HC_vs_MS.Trt_B |
| ZNF862     | 0.21086 | 0.2915  | 0.107 | 0.09 | 1 | HC_vs_MS.Trt_B |
| SRPRB      | 0.2109  | 0.40987 | 0.139 | 0.12 | 1 | HC_vs_MS.Trt_B |
| P4HA1      | 0.21157 | 0.26748 | 0.161 | 0.13 | 1 | HC_vs_MS.Trt_B |
| ATOX1      | 0.2116  | 0.25502 | 0.174 | 0.15 | 1 | HC_vs_MS.Trt_B |
| PRKACA     | 0.21162 | 0.33702 | 0.172 | 0.15 | 1 | HC_vs_MS.Trt_B |
| TAF5L      | 0.21174 | 0.72364 | 0.104 | 0.08 | 1 | HC_vs_MS.Trt_B |
| TPI1       | 0.21192 | -0.2566 | 0.372 | 0.4  | 1 | HC_vs_MS.Trt_B |
| LCAT       | 0.21228 | -0.5578 | 0.187 | 0.16 | 1 | HC_vs_MS.Trt_B |
| KPTN       | 0.21256 | 0.79495 | 0.212 | 0.17 | 1 | HC_vs_MS.Trt_B |
| NDUFA13    | 0.21273 | -0.8168 | 0.409 | 0.41 | 1 | HC_vs_MS.Trt_B |
| KDM5B      | 0.21393 | 0.30223 | 0.277 | 0.25 | 1 | HC_vs_MS.Trt_B |
| PPP1R9A    | 0.2141  | 0.28141 | 0.158 | 0.13 | 1 | HC_vs_MS.Trt_B |
| FCGR2A     | 0.21463 | -0.5941 | 0.162 | 0.14 | 1 | HC_vs_MS.Trt_B |
| GARNL3     | 0.21471 | 0.61721 | 0.155 | 0.13 | 1 | HC_vs_MS.Trt_B |
| ZNF622     | 0.21566 | -0.9801 | 0.081 | 0.1  | 1 | HC_vs_MS.Trt_B |
| COG6       | 0.21576 | -0.6622 | 0.12  | 0.1  | 1 | HC_vs_MS.Trt_B |

|          |         |         |       |      |   |                |
|----------|---------|---------|-------|------|---|----------------|
| PTPRE    | 0.21592 | -0.3036 | 0.355 | 0.32 | 1 | HC_vs_MS.Trt_B |
| ATG4B    | 0.21628 | 0.33366 | 0.152 | 0.13 | 1 | HC_vs_MS.Trt_B |
| HSPD1    | 0.2163  | 0.27587 | 0.193 | 0.17 | 1 | HC_vs_MS.Trt_B |
| LSM12    | 0.21673 | -0.2906 | 0.622 | 0.58 | 1 | HC_vs_MS.Trt_B |
| BLMH     | 0.21703 | 0.34665 | 0.581 | 0.55 | 1 | HC_vs_MS.Trt_B |
| DUSP7    | 0.21744 | -0.3164 | 0.109 | 0.09 | 1 | HC_vs_MS.Trt_B |
| TSPYL1   | 0.21768 | -0.2605 | 0.522 | 0.47 | 1 | HC_vs_MS.Trt_B |
| ZNF18    | 0.21768 | 0.31868 | 0.312 | 0.29 | 1 | HC_vs_MS.Trt_B |
| NSMAF    | 0.21782 | 0.31749 | 0.162 | 0.14 | 1 | HC_vs_MS.Trt_B |
| HNF1B    | 0.21795 | 0.30372 | 0.17  | 0.14 | 1 | HC_vs_MS.Trt_B |
| BCAT2    | 0.219   | -0.4282 | 0.142 | 0.12 | 1 | HC_vs_MS.Trt_B |
| HGS      | 0.21928 | -0.3289 | 0.599 | 0.55 | 1 | HC_vs_MS.Trt_B |
| MPG      | 0.21946 | -0.6407 | 0.094 | 0.12 | 1 | HC_vs_MS.Trt_B |
| ABCD3    | 0.21977 | 0.86169 | 0.125 | 0.1  | 1 | HC_vs_MS.Trt_B |
| VPS18    | 0.22118 | 0.44098 | 0.197 | 0.17 | 1 | HC_vs_MS.Trt_B |
| POLR2L   | 0.22134 | -0.3126 | 0.212 | 0.18 | 1 | HC_vs_MS.Trt_B |
| CCDC115  | 0.22182 | -0.5625 | 0.086 | 0.11 | 1 | HC_vs_MS.Trt_B |
| STAU1    | 0.22188 | -0.5375 | 0.293 | 0.33 | 1 | HC_vs_MS.Trt_B |
| WDR37    | 0.22325 | -0.2734 | 0.161 | 0.13 | 1 | HC_vs_MS.Trt_B |
| PCNP     | 0.22456 | -0.6344 | 0.235 | 0.2  | 1 | HC_vs_MS.Trt_B |
| XYLT1    | 0.22631 | 0.60044 | 0.116 | 0.1  | 1 | HC_vs_MS.Trt_B |
| SPEG     | 0.22724 | 0.29541 | 0.23  | 0.21 | 1 | HC_vs_MS.Trt_B |
| CEP55    | 0.22858 | -0.661  | 0.126 | 0.1  | 1 | HC_vs_MS.Trt_B |
| UBE2K    | 0.22977 | 0.5119  | 0.133 | 0.11 | 1 | HC_vs_MS.Trt_B |
| ENO2     | 0.22978 | 0.66923 | 0.199 | 0.17 | 1 | HC_vs_MS.Trt_B |
| RAPGEF2  | 0.23086 | -0.3418 | 0.348 | 0.32 | 1 | HC_vs_MS.Trt_B |
| CCDC15   | 0.23106 | 0.38817 | 0.216 | 0.19 | 1 | HC_vs_MS.Trt_B |
| MAP2K4   | 0.23239 | 1.06586 | 0.213 | 0.19 | 1 | HC_vs_MS.Trt_B |
| MRPL32   | 0.23409 | -0.4439 | 0.122 | 0.1  | 1 | HC_vs_MS.Trt_B |
| APOBR    | 0.2353  | -0.6282 | 0.104 | 0.08 | 1 | HC_vs_MS.Trt_B |
| XPO7     | 0.23617 | -0.3884 | 0.1   | 0.12 | 1 | HC_vs_MS.Trt_B |
| RAD21    | 0.23662 | -0.3203 | 0.33  | 0.3  | 1 | HC_vs_MS.Trt_B |
| UPK3BL   | 0.23752 | -0.5295 | 0.532 | 0.53 | 1 | HC_vs_MS.Trt_B |
| RHBDD3   | 0.23793 | 0.66924 | 0.467 | 0.44 | 1 | HC_vs_MS.Trt_B |
| GCNT4    | 0.23828 | -0.5822 | 0.475 | 0.5  | 1 | HC_vs_MS.Trt_B |
| PNISR    | 0.23902 | -0.2902 | 0.554 | 0.48 | 1 | HC_vs_MS.Trt_B |
| C19orf52 | 0.23926 | 0.37392 | 0.241 | 0.22 | 1 | HC_vs_MS.Trt_B |
| AGBL3    | 0.24014 | -0.3384 | 0.248 | 0.21 | 1 | HC_vs_MS.Trt_B |
| MAP2K5   | 0.24212 | 0.30067 | 0.103 | 0.08 | 1 | HC_vs_MS.Trt_B |
| UBE2Z    | 0.2423  | -0.2655 | 0.181 | 0.16 | 1 | HC_vs_MS.Trt_B |

|           |         |         |       |      |   |                |
|-----------|---------|---------|-------|------|---|----------------|
| C3orf18   | 0.24308 | -0.373  | 0.214 | 0.19 | 1 | HC_vs_MS.Trt_B |
| MED12     | 0.24336 | -0.3249 | 0.172 | 0.14 | 1 | HC_vs_MS.Trt_B |
| COIL      | 0.24362 | -0.7521 | 0.106 | 0.08 | 1 | HC_vs_MS.Trt_B |
| TMED9     | 0.24392 | -0.4258 | 0.278 | 0.24 | 1 | HC_vs_MS.Trt_B |
| BLM       | 0.24463 | 0.37913 | 0.239 | 0.22 | 1 | HC_vs_MS.Trt_B |
| MRPS31    | 0.24564 | -0.4695 | 0.387 | 0.35 | 1 | HC_vs_MS.Trt_B |
| ALG5      | 0.24606 | -0.4981 | 0.399 | 0.43 | 1 | HC_vs_MS.Trt_B |
| CTNBL1    | 0.24648 | -0.3755 | 0.172 | 0.15 | 1 | HC_vs_MS.Trt_B |
| AGAP2     | 0.24663 | -0.3119 | 0.151 | 0.12 | 1 | HC_vs_MS.Trt_B |
| TRIP4     | 0.24673 | 0.32141 | 0.477 | 0.46 | 1 | HC_vs_MS.Trt_B |
| RCOR1     | 0.24685 | 0.3832  | 0.13  | 0.11 | 1 | HC_vs_MS.Trt_B |
| ALG6      | 0.24706 | 0.4571  | 0.101 | 0.08 | 1 | HC_vs_MS.Trt_B |
| ZFAND2B   | 0.24762 | -0.411  | 0.172 | 0.14 | 1 | HC_vs_MS.Trt_B |
| CPNE8     | 0.24787 | -0.6966 | 0.088 | 0.11 | 1 | HC_vs_MS.Trt_B |
| TTC13     | 0.24822 | -0.3927 | 0.114 | 0.09 | 1 | HC_vs_MS.Trt_B |
| PRKD3     | 0.24847 | -0.3961 | 0.322 | 0.29 | 1 | HC_vs_MS.Trt_B |
| CAT       | 0.24915 | -0.3013 | 0.133 | 0.11 | 1 | HC_vs_MS.Trt_B |
| COX16     | 0.24952 | -0.3394 | 0.487 | 0.53 | 1 | HC_vs_MS.Trt_B |
| CCDC18    | 0.25009 | -0.7573 | 0.159 | 0.13 | 1 | HC_vs_MS.Trt_B |
| DHX16     | 0.25231 | 0.29962 | 0.112 | 0.09 | 1 | HC_vs_MS.Trt_B |
| TMEM263   | 0.25322 | -0.4291 | 0.377 | 0.34 | 1 | HC_vs_MS.Trt_B |
| NSUN7     | 0.25433 | -1.353  | 0.229 | 0.2  | 1 | HC_vs_MS.Trt_B |
| ATP13A3   | 0.2546  | -0.3434 | 0.104 | 0.09 | 1 | HC_vs_MS.Trt_B |
| TNPO2     | 0.25491 | 0.49842 | 0.122 | 0.1  | 1 | HC_vs_MS.Trt_B |
| WDR83OS   | 0.2557  | -0.2614 | 0.178 | 0.15 | 1 | HC_vs_MS.Trt_B |
| MUS81     | 0.25596 | 0.277   | 0.112 | 0.09 | 1 | HC_vs_MS.Trt_B |
| GADD45GIP | 0.25612 | -0.3206 | 0.126 | 0.1  | 1 | HC_vs_MS.Trt_B |
| FKBP3     | 0.25638 | -0.4328 | 0.268 | 0.24 | 1 | HC_vs_MS.Trt_B |
| MEGF9     | 0.25681 | -0.4357 | 0.436 | 0.39 | 1 | HC_vs_MS.Trt_B |
| ANKRD36C  | 0.25705 | -0.2581 | 0.517 | 0.48 | 1 | HC_vs_MS.Trt_B |
| VAMP4     | 0.25728 | -1.0383 | 0.17  | 0.14 | 1 | HC_vs_MS.Trt_B |
| TRAM1     | 0.25894 | -0.278  | 0.383 | 0.34 | 1 | HC_vs_MS.Trt_B |
| HMG1      | 0.25931 | -0.3514 | 0.414 | 0.38 | 1 | HC_vs_MS.Trt_B |
| TPD52L2   | 0.25944 | -0.3693 | 0.201 | 0.18 | 1 | HC_vs_MS.Trt_B |
| ARL14EP   | 0.25961 | -0.5124 | 0.203 | 0.18 | 1 | HC_vs_MS.Trt_B |
| POLR3GL   | 0.26402 | -0.2784 | 0.174 | 0.15 | 1 | HC_vs_MS.Trt_B |
| DHX29     | 0.2648  | 0.46248 | 0.128 | 0.11 | 1 | HC_vs_MS.Trt_B |
| SLCO4C1   | 0.26558 | 0.27535 | 0.157 | 0.13 | 1 | HC_vs_MS.Trt_B |
| ANAPC10   | 0.2663  | 0.34039 | 0.104 | 0.09 | 1 | HC_vs_MS.Trt_B |
| HLA-DRB5  | 0.26652 | -2.4197 | 0.087 | 0.11 | 1 | HC_vs_MS.Trt_B |

|           |         |         |       |      |   |                |
|-----------|---------|---------|-------|------|---|----------------|
| PHTF1     | 0.26726 | -0.8797 | 0.428 | 0.4  | 1 | HC_vs_MS.Trt_B |
| DSN1      | 0.26779 | 0.56122 | 0.225 | 0.2  | 1 | HC_vs_MS.Trt_B |
| LPCAT4    | 0.26791 | 0.56109 | 0.262 | 0.24 | 1 | HC_vs_MS.Trt_B |
| TOPBP1    | 0.26885 | 0.42125 | 0.106 | 0.09 | 1 | HC_vs_MS.Trt_B |
| LAYN      | 0.26926 | -0.7926 | 0.193 | 0.17 | 1 | HC_vs_MS.Trt_B |
| TBCB      | 0.26996 | -0.4584 | 0.645 | 0.6  | 1 | HC_vs_MS.Trt_B |
| BRAP      | 0.27072 | -0.3407 | 0.28  | 0.25 | 1 | HC_vs_MS.Trt_B |
| DNAAF5    | 0.27107 | -1.5546 | 0.19  | 0.17 | 1 | HC_vs_MS.Trt_B |
| HDHD3     | 0.27109 | 0.37247 | 0.136 | 0.12 | 1 | HC_vs_MS.Trt_B |
| CDC42     | 0.2714  | -0.4711 | 0.868 | 0.81 | 1 | HC_vs_MS.Trt_B |
| CD96      | 0.27218 | -0.4104 | 0.549 | 0.51 | 1 | HC_vs_MS.Trt_B |
| TMIGD2    | 0.27398 | -0.3076 | 0.199 | 0.17 | 1 | HC_vs_MS.Trt_B |
| CDH15     | 0.27502 | 0.38169 | 0.403 | 0.38 | 1 | HC_vs_MS.Trt_B |
| IQGAP1    | 0.27637 | -0.3949 | 0.791 | 0.72 | 1 | HC_vs_MS.Trt_B |
| UBR3      | 0.27782 | -0.5947 | 0.116 | 0.1  | 1 | HC_vs_MS.Trt_B |
| CEBPZ     | 0.27784 | -0.4123 | 0.2   | 0.17 | 1 | HC_vs_MS.Trt_B |
| TRIM46    | 0.27785 | -0.4202 | 0.417 | 0.38 | 1 | HC_vs_MS.Trt_B |
| HNRNPLL   | 0.27796 | -0.2577 | 0.235 | 0.21 | 1 | HC_vs_MS.Trt_B |
| PPP2R2A   | 0.27832 | -0.4762 | 0.126 | 0.11 | 1 | HC_vs_MS.Trt_B |
| CHST3     | 0.27845 | 0.33081 | 0.139 | 0.12 | 1 | HC_vs_MS.Trt_B |
| FN1       | 0.27911 | -0.6824 | 0.348 | 0.31 | 1 | HC_vs_MS.Trt_B |
| 6-Mar     | 0.28003 | -0.4178 | 0.8   | 0.73 | 1 | HC_vs_MS.Trt_B |
| YPEL3     | 0.2807  | -0.296  | 0.235 | 0.2  | 1 | HC_vs_MS.Trt_B |
| LGALS1    | 0.28093 | -0.7321 | 0.175 | 0.2  | 1 | HC_vs_MS.Trt_B |
| BNIP3L    | 0.28106 | -0.346  | 0.181 | 0.16 | 1 | HC_vs_MS.Trt_B |
| MTM1      | 0.28169 | -0.4423 | 0.135 | 0.11 | 1 | HC_vs_MS.Trt_B |
| CDRT4     | 0.28247 | 0.30178 | 0.101 | 0.08 | 1 | HC_vs_MS.Trt_B |
| SPAG4     | 0.28295 | -0.3729 | 0.188 | 0.16 | 1 | HC_vs_MS.Trt_B |
| CAGE1     | 0.28411 | -0.3566 | 0.291 | 0.25 | 1 | HC_vs_MS.Trt_B |
| UPF3B     | 0.28436 | -0.2927 | 0.13  | 0.11 | 1 | HC_vs_MS.Trt_B |
| PRDX3     | 0.28536 | -0.8075 | 0.409 | 0.37 | 1 | HC_vs_MS.Trt_B |
| NPIP6     | 0.28594 | 0.27122 | 0.186 | 0.17 | 1 | HC_vs_MS.Trt_B |
| MAD1L1    | 0.28684 | -0.5476 | 0.284 | 0.24 | 1 | HC_vs_MS.Trt_B |
| TRAFD1    | 0.28753 | 0.3371  | 0.201 | 0.18 | 1 | HC_vs_MS.Trt_B |
| SESN3     | 0.28796 | -0.2743 | 0.259 | 0.23 | 1 | HC_vs_MS.Trt_B |
| STX18     | 0.29023 | 0.6064  | 0.12  | 0.1  | 1 | HC_vs_MS.Trt_B |
| NCBP2-AS2 | 0.29047 | -0.359  | 0.116 | 0.14 | 1 | HC_vs_MS.Trt_B |
| MSL3      | 0.29135 | 0.2563  | 0.184 | 0.16 | 1 | HC_vs_MS.Trt_B |
| DAD1      | 0.29162 | -0.4323 | 0.307 | 0.27 | 1 | HC_vs_MS.Trt_B |
| HMG3      | 0.29233 | -0.6676 | 0.17  | 0.19 | 1 | HC_vs_MS.Trt_B |

|            |         |         |       |      |   |                |
|------------|---------|---------|-------|------|---|----------------|
| LARP1      | 0.29355 | -0.2997 | 0.18  | 0.15 | 1 | HC_vs_MS.Trt_B |
| TMTC3      | 0.2948  | -0.6117 | 0.181 | 0.16 | 1 | HC_vs_MS.Trt_B |
| GPR107     | 0.29522 | 0.65386 | 0.145 | 0.13 | 1 | HC_vs_MS.Trt_B |
| VRK1       | 0.2955  | -0.6219 | 0.206 | 0.18 | 1 | HC_vs_MS.Trt_B |
| TSEN34     | 0.29633 | -0.4284 | 0.112 | 0.09 | 1 | HC_vs_MS.Trt_B |
| CREM       | 0.29919 | -1.085  | 0.135 | 0.16 | 1 | HC_vs_MS.Trt_B |
| BAP1       | 0.29931 | -0.5921 | 0.307 | 0.28 | 1 | HC_vs_MS.Trt_B |
| HAVCR1     | 0.29956 | -0.6856 | 0.335 | 0.3  | 1 | HC_vs_MS.Trt_B |
| SLC25A35   | 0.29978 | -0.6305 | 0.142 | 0.12 | 1 | HC_vs_MS.Trt_B |
| ISCU       | 0.30008 | -0.3651 | 0.317 | 0.34 | 1 | HC_vs_MS.Trt_B |
| DCAF6      | 0.30095 | 0.67451 | 0.159 | 0.14 | 1 | HC_vs_MS.Trt_B |
| INCA1      | 0.30098 | -0.7482 | 0.18  | 0.16 | 1 | HC_vs_MS.Trt_B |
| TMEM216    | 0.3014  | -0.3815 | 0.322 | 0.29 | 1 | HC_vs_MS.Trt_B |
| G2E3       | 0.30181 | -0.2631 | 0.488 | 0.46 | 1 | HC_vs_MS.Trt_B |
| PTTG1P     | 0.30266 | 0.30063 | 0.139 | 0.12 | 1 | HC_vs_MS.Trt_B |
| KDM2B      | 0.30292 | 0.26453 | 0.791 | 0.74 | 1 | HC_vs_MS.Trt_B |
| PSMB7      | 0.30447 | -0.2622 | 0.174 | 0.2  | 1 | HC_vs_MS.Trt_B |
| C5orf15    | 0.30671 | -0.4194 | 0.113 | 0.09 | 1 | HC_vs_MS.Trt_B |
| AGL        | 0.3076  | 0.38236 | 0.13  | 0.11 | 1 | HC_vs_MS.Trt_B |
| AC240274.1 | 0.30835 | 1.13522 | 0.241 | 0.21 | 1 | HC_vs_MS.Trt_B |
| ATRX       | 0.3084  | -0.3733 | 0.551 | 0.5  | 1 | HC_vs_MS.Trt_B |
| CCNT2      | 0.30898 | 0.33215 | 0.133 | 0.12 | 1 | HC_vs_MS.Trt_B |
| NDUFB3     | 0.30905 | -0.3097 | 0.143 | 0.12 | 1 | HC_vs_MS.Trt_B |
| PARP1      | 0.30986 | -0.3253 | 0.313 | 0.28 | 1 | HC_vs_MS.Trt_B |
| PRKCB      | 0.30989 | -0.3623 | 0.291 | 0.26 | 1 | HC_vs_MS.Trt_B |
| IER3IP1    | 0.31137 | -0.7124 | 0.123 | 0.1  | 1 | HC_vs_MS.Trt_B |
| COMMD6     | 0.31202 | -0.7263 | 0.332 | 0.34 | 1 | HC_vs_MS.Trt_B |
| RXRA       | 0.3128  | 1.1061  | 0.138 | 0.12 | 1 | HC_vs_MS.Trt_B |
| RNF168     | 0.31282 | -0.355  | 0.543 | 0.48 | 1 | HC_vs_MS.Trt_B |
| PPME1      | 0.31352 | 0.36494 | 0.116 | 0.1  | 1 | HC_vs_MS.Trt_B |
| LSR        | 0.3136  | 0.34116 | 0.152 | 0.13 | 1 | HC_vs_MS.Trt_B |
| RAPH1      | 0.31402 | -0.2883 | 0.146 | 0.12 | 1 | HC_vs_MS.Trt_B |
| CBX3       | 0.31416 | -0.3445 | 0.535 | 0.49 | 1 | HC_vs_MS.Trt_B |
| MYO1D      | 0.31552 | -0.7267 | 0.128 | 0.11 | 1 | HC_vs_MS.Trt_B |
| RANBP10    | 0.31782 | -0.2509 | 0.107 | 0.09 | 1 | HC_vs_MS.Trt_B |
| COX6B1     | 0.31845 | 0.41538 | 0.104 | 0.09 | 1 | HC_vs_MS.Trt_B |
| IL11RA     | 0.31912 | -0.3456 | 0.145 | 0.12 | 1 | HC_vs_MS.Trt_B |
| MTPN       | 0.31968 | 0.2589  | 0.162 | 0.14 | 1 | HC_vs_MS.Trt_B |
| EXOSC8     | 0.32204 | -0.6051 | 0.452 | 0.43 | 1 | HC_vs_MS.Trt_B |
| HMGXB3     | 0.3231  | 0.26741 | 0.128 | 0.11 | 1 | HC_vs_MS.Trt_B |

|          |         |         |       |      |   |                |
|----------|---------|---------|-------|------|---|----------------|
| LYRM9    | 0.32358 | 0.79819 | 0.196 | 0.18 | 1 | HC_vs_MS.Trt_B |
| GNB1     | 0.32616 | -0.2884 | 0.29  | 0.26 | 1 | HC_vs_MS.Trt_B |
| ZNF223   | 0.32667 | -0.7218 | 0.101 | 0.08 | 1 | HC_vs_MS.Trt_B |
| TP53BP1  | 0.32669 | -0.3175 | 0.252 | 0.22 | 1 | HC_vs_MS.Trt_B |
| IKZF5    | 0.32758 | -0.3967 | 0.158 | 0.18 | 1 | HC_vs_MS.Trt_B |
| PEX7     | 0.32819 | 0.45612 | 0.141 | 0.12 | 1 | HC_vs_MS.Trt_B |
| ANKRD26  | 0.32874 | 0.72444 | 0.123 | 0.11 | 1 | HC_vs_MS.Trt_B |
| NPIP15   | 0.33153 | -0.6609 | 0.193 | 0.21 | 1 | HC_vs_MS.Trt_B |
| CASP8AP2 | 0.33196 | -0.32   | 0.342 | 0.31 | 1 | HC_vs_MS.Trt_B |
| MYL12A   | 0.33249 | -0.2611 | 0.894 | 0.79 | 1 | HC_vs_MS.Trt_B |
| PLCL1    | 0.3333  | -0.2523 | 0.129 | 0.11 | 1 | HC_vs_MS.Trt_B |
| NIPA1    | 0.3342  | 0.37562 | 0.101 | 0.12 | 1 | HC_vs_MS.Trt_B |
| GPS2     | 0.33688 | -0.4164 | 0.193 | 0.21 | 1 | HC_vs_MS.Trt_B |
| ZNF547   | 0.33704 | -1.2761 | 0.203 | 0.17 | 1 | HC_vs_MS.Trt_B |
| PRKRA    | 0.33718 | -0.2625 | 0.216 | 0.2  | 1 | HC_vs_MS.Trt_B |
| GUCA1B   | 0.33729 | -0.2795 | 0.29  | 0.26 | 1 | HC_vs_MS.Trt_B |
| ESAM     | 0.33873 | 0.79273 | 0.109 | 0.09 | 1 | HC_vs_MS.Trt_B |
| PILRB    | 0.3403  | -0.6446 | 0.419 | 0.39 | 1 | HC_vs_MS.Trt_B |
| XXYLT1   | 0.34095 | -0.7616 | 0.183 | 0.16 | 1 | HC_vs_MS.Trt_B |
| ZNF574   | 0.34131 | 0.38332 | 0.316 | 0.29 | 1 | HC_vs_MS.Trt_B |
| PACRGL   | 0.34173 | 0.45621 | 0.271 | 0.25 | 1 | HC_vs_MS.Trt_B |
| NFXL1    | 0.3424  | 0.51708 | 0.103 | 0.09 | 1 | HC_vs_MS.Trt_B |
| ERP44    | 0.34252 | -0.5478 | 0.219 | 0.19 | 1 | HC_vs_MS.Trt_B |
| LSG1     | 0.34277 | -0.2766 | 0.361 | 0.34 | 1 | HC_vs_MS.Trt_B |
| ERICH1   | 0.34278 | -0.4509 | 0.178 | 0.16 | 1 | HC_vs_MS.Trt_B |
| HIST1H4C | 0.34295 | -0.4314 | 0.319 | 0.28 | 1 | HC_vs_MS.Trt_B |
| PCNT     | 0.34527 | -0.2603 | 0.167 | 0.15 | 1 | HC_vs_MS.Trt_B |
| NDUFB10  | 0.34595 | -0.418  | 0.177 | 0.16 | 1 | HC_vs_MS.Trt_B |
| PAPD4    | 0.34669 | -0.577  | 0.226 | 0.2  | 1 | HC_vs_MS.Trt_B |
| BRICD5   | 0.34692 | 0.28637 | 0.251 | 0.23 | 1 | HC_vs_MS.Trt_B |
| ATRAID   | 0.34744 | -0.4131 | 0.183 | 0.21 | 1 | HC_vs_MS.Trt_B |
| TMED10   | 0.34789 | -0.3965 | 0.641 | 0.6  | 1 | HC_vs_MS.Trt_B |
| RPA1     | 0.3482  | -0.4816 | 0.264 | 0.24 | 1 | HC_vs_MS.Trt_B |
| NME3     | 0.34967 | -0.3599 | 0.113 | 0.1  | 1 | HC_vs_MS.Trt_B |
| METTL5   | 0.35123 | -0.5683 | 0.464 | 0.43 | 1 | HC_vs_MS.Trt_B |
| RPS21    | 0.35139 | -0.4025 | 0.439 | 0.4  | 1 | HC_vs_MS.Trt_B |
| ZBTB1    | 0.35245 | -0.312  | 0.136 | 0.16 | 1 | HC_vs_MS.Trt_B |
| ADRM1    | 0.35475 | -0.4399 | 0.172 | 0.19 | 1 | HC_vs_MS.Trt_B |
| ZMYM5    | 0.3552  | -0.4066 | 0.2   | 0.18 | 1 | HC_vs_MS.Trt_B |
| FNDC3B   | 0.35563 | -0.2723 | 0.667 | 0.66 | 1 | HC_vs_MS.Trt_B |

|           |         |         |       |      |   |                |
|-----------|---------|---------|-------|------|---|----------------|
| PATZ1     | 0.35799 | -0.2581 | 0.107 | 0.09 | 1 | HC_vs_MS.Trt_B |
| FAM168B   | 0.35816 | -0.4252 | 0.106 | 0.09 | 1 | HC_vs_MS.Trt_B |
| NSUN5     | 0.35867 | -0.5344 | 0.312 | 0.28 | 1 | HC_vs_MS.Trt_B |
| SLC31A2   | 0.35918 | 0.39647 | 0.101 | 0.09 | 1 | HC_vs_MS.Trt_B |
| CD3G      | 0.3595  | -0.4956 | 0.948 | 0.92 | 1 | HC_vs_MS.Trt_B |
| OARD1     | 0.35966 | -0.5666 | 0.197 | 0.17 | 1 | HC_vs_MS.Trt_B |
| LINC00116 | 0.35973 | -0.7292 | 0.106 | 0.12 | 1 | HC_vs_MS.Trt_B |
| RBM4B     | 0.3604  | 0.26263 | 0.174 | 0.16 | 1 | HC_vs_MS.Trt_B |
| ADAM28    | 0.36052 | -0.3292 | 0.135 | 0.12 | 1 | HC_vs_MS.Trt_B |
| MAP3K7    | 0.36079 | -0.4505 | 0.133 | 0.12 | 1 | HC_vs_MS.Trt_B |
| HLA-DRB3  | 0.36127 | -1.3942 | 0.093 | 0.11 | 1 | HC_vs_MS.Trt_B |
| CPNE1     | 0.36239 | -0.3315 | 0.459 | 0.46 | 1 | HC_vs_MS.Trt_B |
| ARHGEF40  | 0.36441 | -0.7064 | 0.125 | 0.11 | 1 | HC_vs_MS.Trt_B |
| RPA3      | 0.36872 | -0.5213 | 0.178 | 0.16 | 1 | HC_vs_MS.Trt_B |
| SPIN1     | 0.36971 | -0.7114 | 0.155 | 0.14 | 1 | HC_vs_MS.Trt_B |
| AHCTF1    | 0.36999 | -0.5907 | 0.133 | 0.15 | 1 | HC_vs_MS.Trt_B |
| APOL2     | 0.37142 | -0.3679 | 0.561 | 0.5  | 1 | HC_vs_MS.Trt_B |
| COX17     | 0.37266 | -0.4423 | 0.245 | 0.22 | 1 | HC_vs_MS.Trt_B |
| UBE2I     | 0.37293 | -0.2506 | 0.52  | 0.48 | 1 | HC_vs_MS.Trt_B |
| MRPL13    | 0.37355 | -0.5408 | 0.087 | 0.1  | 1 | HC_vs_MS.Trt_B |
| VAMP5     | 0.37461 | -0.3749 | 0.113 | 0.1  | 1 | HC_vs_MS.Trt_B |
| PSMA1     | 0.37687 | -0.5523 | 0.294 | 0.26 | 1 | HC_vs_MS.Trt_B |
| CYC1      | 0.37688 | -0.7518 | 0.099 | 0.11 | 1 | HC_vs_MS.Trt_B |
| DICER1    | 0.37919 | -0.5458 | 0.148 | 0.13 | 1 | HC_vs_MS.Trt_B |
| CARD16    | 0.37975 | -0.3606 | 0.252 | 0.22 | 1 | HC_vs_MS.Trt_B |
| EIF1AX    | 0.37983 | -0.3503 | 0.242 | 0.22 | 1 | HC_vs_MS.Trt_B |
| CCDC93    | 0.38076 | 0.65387 | 0.114 | 0.1  | 1 | HC_vs_MS.Trt_B |
| ADRB2     | 0.38183 | 0.40254 | 0.187 | 0.17 | 1 | HC_vs_MS.Trt_B |
| GSTO1     | 0.38251 | -0.4122 | 0.11  | 0.13 | 1 | HC_vs_MS.Trt_B |
| CCT5      | 0.38259 | -0.5038 | 0.138 | 0.16 | 1 | HC_vs_MS.Trt_B |
| RRAGA     | 0.38355 | 0.25591 | 0.11  | 0.1  | 1 | HC_vs_MS.Trt_B |
| COPE      | 0.38364 | -0.2542 | 0.303 | 0.28 | 1 | HC_vs_MS.Trt_B |
| ADARB1    | 0.38446 | -0.4895 | 0.197 | 0.18 | 1 | HC_vs_MS.Trt_B |
| CDC123    | 0.38491 | -0.4655 | 0.188 | 0.17 | 1 | HC_vs_MS.Trt_B |
| UBN1      | 0.38521 | -0.412  | 0.117 | 0.1  | 1 | HC_vs_MS.Trt_B |
| FAM103A1  | 0.3858  | 0.45    | 0.101 | 0.09 | 1 | HC_vs_MS.Trt_B |
| MAMLD1    | 0.38697 | -0.7442 | 0.187 | 0.16 | 1 | HC_vs_MS.Trt_B |
| B3GNTL1   | 0.38708 | -0.3378 | 0.217 | 0.2  | 1 | HC_vs_MS.Trt_B |
| ALOX5AP   | 0.38804 | -0.5575 | 0.213 | 0.23 | 1 | HC_vs_MS.Trt_B |
| ADCY4     | 0.38948 | -0.643  | 0.088 | 0.11 | 1 | HC_vs_MS.Trt_B |



|          |         |         |       |      |   |                |
|----------|---------|---------|-------|------|---|----------------|
| PI4KA    | 0.38997 | -0.4785 | 0.225 | 0.2  | 1 | HC_vs_MS.Trt_B |
| PIBF1    | 0.39191 | 0.37439 | 0.128 | 0.11 | 1 | HC_vs_MS.Trt_B |
| PSMB6    | 0.39338 | -0.7792 | 0.571 | 0.58 | 1 | HC_vs_MS.Trt_B |
| SGPL1    | 0.39367 | -0.4565 | 0.419 | 0.38 | 1 | HC_vs_MS.Trt_B |
| PSEN2    | 0.39367 | -1.2647 | 0.138 | 0.12 | 1 | HC_vs_MS.Trt_B |
| S100A6   | 0.39489 | -0.2972 | 0.496 | 0.45 | 1 | HC_vs_MS.Trt_B |
| DENND5A  | 0.39499 | -0.5033 | 0.225 | 0.2  | 1 | HC_vs_MS.Trt_B |
| ZMIZ2    | 0.39599 | -0.3428 | 0.128 | 0.11 | 1 | HC_vs_MS.Trt_B |
| CUL1     | 0.39677 | -0.2629 | 0.158 | 0.14 | 1 | HC_vs_MS.Trt_B |
| SCP2     | 0.39684 | -0.441  | 0.184 | 0.16 | 1 | HC_vs_MS.Trt_B |
| PSME2    | 0.39779 | -0.4906 | 0.301 | 0.31 | 1 | HC_vs_MS.Trt_B |
| PAPD5    | 0.3984  | 0.55608 | 0.136 | 0.12 | 1 | HC_vs_MS.Trt_B |
| DOK2     | 0.3986  | -0.3588 | 0.333 | 0.34 | 1 | HC_vs_MS.Trt_B |
| FKBP4    | 0.39884 | -0.69   | 0.094 | 0.11 | 1 | HC_vs_MS.Trt_B |
| SLC16A1  | 0.39984 | 0.52889 | 0.103 | 0.09 | 1 | HC_vs_MS.Trt_B |
| HIST1H3E | 0.40039 | 1.16168 | 0.112 | 0.1  | 1 | HC_vs_MS.Trt_B |
| SLX1A    | 0.40169 | -0.3464 | 0.459 | 0.42 | 1 | HC_vs_MS.Trt_B |
| NOG      | 0.40223 | -0.6992 | 0.241 | 0.22 | 1 | HC_vs_MS.Trt_B |
| INF2     | 0.40342 | -0.6521 | 0.199 | 0.18 | 1 | HC_vs_MS.Trt_B |
| UBL3     | 0.40371 | -0.7145 | 0.165 | 0.18 | 1 | HC_vs_MS.Trt_B |
| PHACTR1  | 0.40507 | 0.84769 | 0.393 | 0.39 | 1 | HC_vs_MS.Trt_B |
| RB1CC1   | 0.40771 | -0.3495 | 0.293 | 0.27 | 1 | HC_vs_MS.Trt_B |
| TWF2     | 0.40823 | -0.4235 | 0.168 | 0.19 | 1 | HC_vs_MS.Trt_B |
| RNF181   | 0.40834 | -0.616  | 0.139 | 0.15 | 1 | HC_vs_MS.Trt_B |
| MAPRE2   | 0.4128  | -0.4139 | 0.184 | 0.21 | 1 | HC_vs_MS.Trt_B |
| MED14    | 0.41376 | 0.56434 | 0.141 | 0.13 | 1 | HC_vs_MS.Trt_B |
| GTF3C4   | 0.41429 | -0.2618 | 0.29  | 0.27 | 1 | HC_vs_MS.Trt_B |
| NEO1     | 0.41674 | -0.6985 | 0.245 | 0.22 | 1 | HC_vs_MS.Trt_B |
| ITM2B    | 0.41757 | -0.2518 | 0.567 | 0.51 | 1 | HC_vs_MS.Trt_B |
| ATP5I    | 0.41879 | -0.6412 | 0.219 | 0.2  | 1 | HC_vs_MS.Trt_B |
| CIB1     | 0.41909 | -0.5168 | 0.196 | 0.17 | 1 | HC_vs_MS.Trt_B |
| KLHDC3   | 0.42058 | 0.36771 | 0.117 | 0.11 | 1 | HC_vs_MS.Trt_B |
| ABCB6    | 0.42114 | 0.41688 | 0.113 | 0.1  | 1 | HC_vs_MS.Trt_B |
| SYF2     | 0.42144 | -0.4116 | 0.419 | 0.38 | 1 | HC_vs_MS.Trt_B |
| RANBP1   | 0.4226  | -0.8011 | 0.142 | 0.16 | 1 | HC_vs_MS.Trt_B |
| PAIP2    | 0.42305 | -0.5515 | 0.571 | 0.54 | 1 | HC_vs_MS.Trt_B |
| FBXW7    | 0.42389 | -0.3717 | 0.152 | 0.14 | 1 | HC_vs_MS.Trt_B |
| GTF3A    | 0.42504 | -0.3058 | 0.394 | 0.34 | 1 | HC_vs_MS.Trt_B |
| BLOC1S1  | 0.42756 | -0.3826 | 0.165 | 0.14 | 1 | HC_vs_MS.Trt_B |
| ZNF600   | 0.42823 | 0.60377 | 0.142 | 0.13 | 1 | HC_vs_MS.Trt_B |

|          |         |         |       |      |   |                |
|----------|---------|---------|-------|------|---|----------------|
| SEC61G   | 0.43113 | -0.3293 | 0.216 | 0.2  | 1 | HC_vs_MS.Trt_B |
| PRR14    | 0.43137 | 0.30435 | 0.114 | 0.1  | 1 | HC_vs_MS.Trt_B |
| C7orf49  | 0.43157 | 0.32252 | 0.145 | 0.13 | 1 | HC_vs_MS.Trt_B |
| RNF31    | 0.43487 | -0.5054 | 0.28  | 0.25 | 1 | HC_vs_MS.Trt_B |
| GPX2     | 0.43512 | 1.19109 | 0.18  | 0.17 | 1 | HC_vs_MS.Trt_B |
| ATP11B   | 0.43664 | -0.4978 | 0.204 | 0.19 | 1 | HC_vs_MS.Trt_B |
| ZNF573   | 0.43819 | 1.11465 | 0.368 | 0.36 | 1 | HC_vs_MS.Trt_B |
| CBLL1    | 0.43885 | -0.2843 | 0.272 | 0.25 | 1 | HC_vs_MS.Trt_B |
| C10orf95 | 0.44091 | -0.3548 | 0.162 | 0.18 | 1 | HC_vs_MS.Trt_B |
| ITM2A    | 0.44263 | -0.301  | 0.219 | 0.24 | 1 | HC_vs_MS.Trt_B |
| KIAA0556 | 0.44476 | 0.63812 | 0.259 | 0.24 | 1 | HC_vs_MS.Trt_B |
| LSM4     | 0.44595 | -0.2996 | 0.165 | 0.15 | 1 | HC_vs_MS.Trt_B |
| DCUN1D4  | 0.446   | -0.3418 | 0.249 | 0.23 | 1 | HC_vs_MS.Trt_B |
| ENY2     | 0.45026 | -0.9656 | 0.525 | 0.48 | 1 | HC_vs_MS.Trt_B |
| DNAJC4   | 0.45059 | 0.2875  | 0.117 | 0.11 | 1 | HC_vs_MS.Trt_B |
| TSPYL2   | 0.45213 | -0.4253 | 0.152 | 0.17 | 1 | HC_vs_MS.Trt_B |
| SLC35F2  | 0.45386 | -0.7933 | 0.219 | 0.2  | 1 | HC_vs_MS.Trt_B |
| SNRPE    | 0.45452 | -0.389  | 0.11  | 0.1  | 1 | HC_vs_MS.Trt_B |
| FLNB     | 0.45609 | 0.39493 | 0.428 | 0.41 | 1 | HC_vs_MS.Trt_B |
| FAM21A   | 0.45921 | -0.3731 | 0.206 | 0.19 | 1 | HC_vs_MS.Trt_B |
| RPP21    | 0.46351 | -0.5125 | 0.112 | 0.12 | 1 | HC_vs_MS.Trt_B |
| DNAJC3   | 0.46586 | -0.625  | 0.458 | 0.42 | 1 | HC_vs_MS.Trt_B |
| R3HDM2   | 0.467   | -0.4426 | 0.78  | 0.76 | 1 | HC_vs_MS.Trt_B |
| RBMXL1   | 0.4686  | 0.79527 | 0.12  | 0.11 | 1 | HC_vs_MS.Trt_B |
| BCAS2    | 0.46942 | -0.494  | 0.162 | 0.14 | 1 | HC_vs_MS.Trt_B |
| NSMCE4A  | 0.47186 | -0.4191 | 0.32  | 0.3  | 1 | HC_vs_MS.Trt_B |
| DUT      | 0.47282 | -0.4047 | 0.133 | 0.12 | 1 | HC_vs_MS.Trt_B |
| ENO1     | 0.47335 | -0.2618 | 0.377 | 0.4  | 1 | HC_vs_MS.Trt_B |
| FAM76A   | 0.47351 | -0.71   | 0.761 | 0.73 | 1 | HC_vs_MS.Trt_B |
| IRF2BP2  | 0.47533 | -0.6314 | 0.197 | 0.17 | 1 | HC_vs_MS.Trt_B |
| RTCB     | 0.47537 | 0.53919 | 0.12  | 0.11 | 1 | HC_vs_MS.Trt_B |
| WDR61    | 0.47541 | -0.5335 | 0.13  | 0.15 | 1 | HC_vs_MS.Trt_B |
| ELOVL1   | 0.47569 | -0.2813 | 0.117 | 0.13 | 1 | HC_vs_MS.Trt_B |
| ZC3H4    | 0.47655 | -0.4328 | 0.312 | 0.29 | 1 | HC_vs_MS.Trt_B |
| KYAT1    | 0.47749 | -0.5926 | 0.12  | 0.11 | 1 | HC_vs_MS.Trt_B |
| LIPA     | 0.47931 | -0.3865 | 0.262 | 0.24 | 1 | HC_vs_MS.Trt_B |
| ROMO1    | 0.48097 | -0.4222 | 0.139 | 0.12 | 1 | HC_vs_MS.Trt_B |
| CWC27    | 0.48151 | -0.2727 | 0.101 | 0.09 | 1 | HC_vs_MS.Trt_B |
| SNRPA    | 0.48204 | -0.3158 | 0.288 | 0.27 | 1 | HC_vs_MS.Trt_B |
| LPCAT3   | 0.48409 | 0.66225 | 0.409 | 0.39 | 1 | HC_vs_MS.Trt_B |

|          |         |         |       |      |   |                |
|----------|---------|---------|-------|------|---|----------------|
| PPP2R5E  | 0.48417 | -0.2558 | 0.188 | 0.17 | 1 | HC_vs_MS.Trt_B |
| PPID     | 0.4844  | -0.6229 | 0.352 | 0.39 | 1 | HC_vs_MS.Trt_B |
| HSPE1    | 0.48494 | -0.6836 | 0.23  | 0.24 | 1 | HC_vs_MS.Trt_B |
| MAP1LC3B | 0.48534 | -0.4572 | 0.303 | 0.27 | 1 | HC_vs_MS.Trt_B |
| STRA13   | 0.48572 | -0.479  | 0.09  | 0.1  | 1 | HC_vs_MS.Trt_B |
| ZIK1     | 0.48608 | 0.38773 | 0.262 | 0.25 | 1 | HC_vs_MS.Trt_B |
| MCRS1    | 0.48673 | -0.3424 | 0.161 | 0.14 | 1 | HC_vs_MS.Trt_B |
| NIPAL2   | 0.48722 | -1.0594 | 0.281 | 0.26 | 1 | HC_vs_MS.Trt_B |
| TRIM26   | 0.48746 | -0.2635 | 0.157 | 0.14 | 1 | HC_vs_MS.Trt_B |
| PEPD     | 0.48858 | 0.29322 | 0.104 | 0.09 | 1 | HC_vs_MS.Trt_B |
| EAPP     | 0.48906 | -0.2959 | 0.203 | 0.19 | 1 | HC_vs_MS.Trt_B |
| MTRR     | 0.49029 | -0.3629 | 0.133 | 0.15 | 1 | HC_vs_MS.Trt_B |
| MTHFS    | 0.49156 | -0.489  | 0.138 | 0.12 | 1 | HC_vs_MS.Trt_B |
| SOCS2    | 0.49241 | 0.31562 | 0.346 | 0.33 | 1 | HC_vs_MS.Trt_B |
| URI1     | 0.49315 | -0.5816 | 0.187 | 0.17 | 1 | HC_vs_MS.Trt_B |
| TIA1     | 0.49365 | -0.3018 | 0.216 | 0.2  | 1 | HC_vs_MS.Trt_B |
| MCM5     | 0.4941  | -0.3719 | 0.164 | 0.15 | 1 | HC_vs_MS.Trt_B |
| TOB1     | 0.49531 | -0.2575 | 0.486 | 0.46 | 1 | HC_vs_MS.Trt_B |
| MYDGF    | 0.49729 | -0.3147 | 0.113 | 0.1  | 1 | HC_vs_MS.Trt_B |
| PPIB     | 0.499   | -0.3347 | 0.677 | 0.63 | 1 | HC_vs_MS.Trt_B |
| JCHAIN   | 0.50069 | -0.424  | 0.114 | 0.1  | 1 | HC_vs_MS.Trt_B |
| MED10    | 0.50073 | -0.3468 | 0.217 | 0.2  | 1 | HC_vs_MS.Trt_B |
| NCOA2    | 0.5017  | -0.2595 | 0.201 | 0.18 | 1 | HC_vs_MS.Trt_B |
| PRPF39   | 0.50186 | -0.3575 | 0.258 | 0.24 | 1 | HC_vs_MS.Trt_B |
| E4F1     | 0.5028  | -0.4897 | 0.094 | 0.11 | 1 | HC_vs_MS.Trt_B |
| DDIT4    | 0.50372 | 0.32257 | 0.132 | 0.12 | 1 | HC_vs_MS.Trt_B |
| HNRNPD   | 0.50388 | -0.2612 | 0.225 | 0.21 | 1 | HC_vs_MS.Trt_B |
| FAM69A   | 0.50457 | -0.3541 | 0.106 | 0.09 | 1 | HC_vs_MS.Trt_B |
| FIGNL1   | 0.50499 | 1.36288 | 0.114 | 0.11 | 1 | HC_vs_MS.Trt_B |
| S1PR1    | 0.50523 | -0.2739 | 0.516 | 0.48 | 1 | HC_vs_MS.Trt_B |
| TSPO     | 0.50744 | -0.2519 | 0.271 | 0.25 | 1 | HC_vs_MS.Trt_B |
| PPOX     | 0.50746 | -0.3289 | 0.216 | 0.2  | 1 | HC_vs_MS.Trt_B |
| KIF22    | 0.50748 | -0.4238 | 0.188 | 0.17 | 1 | HC_vs_MS.Trt_B |
| TRMT61B  | 0.50794 | -0.2574 | 0.107 | 0.1  | 1 | HC_vs_MS.Trt_B |
| DCP1B    | 0.50986 | -0.4912 | 0.133 | 0.15 | 1 | HC_vs_MS.Trt_B |
| CHMP3    | 0.51036 | -0.4617 | 0.299 | 0.27 | 1 | HC_vs_MS.Trt_B |
| CTDSP1   | 0.51069 | -0.2923 | 0.165 | 0.15 | 1 | HC_vs_MS.Trt_B |
| FAHD2B   | 0.51334 | -0.312  | 0.112 | 0.1  | 1 | HC_vs_MS.Trt_B |
| RIC8B    | 0.51347 | -0.4734 | 0.123 | 0.11 | 1 | HC_vs_MS.Trt_B |
| PTEN     | 0.51368 | -0.3141 | 0.478 | 0.45 | 1 | HC_vs_MS.Trt_B |

|            |         |         |       |      |   |                |
|------------|---------|---------|-------|------|---|----------------|
| PEX19      | 0.51452 | -0.2716 | 0.093 | 0.11 | 1 | HC_vs_MS.Trt_B |
| RPL35      | 0.51475 | -0.3014 | 0.759 | 0.66 | 1 | HC_vs_MS.Trt_B |
| AGAP6      | 0.51545 | -0.5934 | 0.101 | 0.09 | 1 | HC_vs_MS.Trt_B |
| OSGEPL1    | 0.51641 | -0.4916 | 0.245 | 0.26 | 1 | HC_vs_MS.Trt_B |
| ST20       | 0.51675 | -0.5247 | 0.146 | 0.16 | 1 | HC_vs_MS.Trt_B |
| RANBP9     | 0.51893 | -0.5507 | 0.186 | 0.17 | 1 | HC_vs_MS.Trt_B |
| UBE2V1     | 0.5208  | -0.2785 | 0.391 | 0.37 | 1 | HC_vs_MS.Trt_B |
| PIP4K2A    | 0.52098 | -0.4196 | 0.741 | 0.7  | 1 | HC_vs_MS.Trt_B |
| BMPR1B     | 0.52169 | -1.3557 | 0.122 | 0.11 | 1 | HC_vs_MS.Trt_B |
| TMEM143    | 0.52269 | 0.69885 | 0.465 | 0.44 | 1 | HC_vs_MS.Trt_B |
| RAP1GDS1   | 0.523   | -0.4927 | 0.338 | 0.34 | 1 | HC_vs_MS.Trt_B |
| DNAJB4     | 0.5261  | 0.6764  | 0.284 | 0.27 | 1 | HC_vs_MS.Trt_B |
| ITGA5      | 0.52684 | -0.5776 | 0.103 | 0.11 | 1 | HC_vs_MS.Trt_B |
| PYURF      | 0.52878 | -0.3217 | 0.171 | 0.16 | 1 | HC_vs_MS.Trt_B |
| PPIE       | 0.5291  | -0.7029 | 0.752 | 0.67 | 1 | HC_vs_MS.Trt_B |
| RGSL1      | 0.52911 | -0.3216 | 0.158 | 0.17 | 1 | HC_vs_MS.Trt_B |
| BACL2      | 0.52926 | 0.37087 | 0.188 | 0.18 | 1 | HC_vs_MS.Trt_B |
| AMFR       | 0.53089 | 0.45533 | 0.514 | 0.5  | 1 | HC_vs_MS.Trt_B |
| GLIPR2     | 0.53304 | -0.5271 | 0.196 | 0.17 | 1 | HC_vs_MS.Trt_B |
| PSMB10     | 0.53629 | -0.3214 | 0.37  | 0.34 | 1 | HC_vs_MS.Trt_B |
| ANKRA2     | 0.53676 | -0.5576 | 0.11  | 0.1  | 1 | HC_vs_MS.Trt_B |
| LARP7      | 0.53743 | -0.5466 | 0.172 | 0.19 | 1 | HC_vs_MS.Trt_B |
| ARNTL      | 0.53925 | -0.3099 | 0.191 | 0.18 | 1 | HC_vs_MS.Trt_B |
| RDX        | 0.53925 | -0.5092 | 0.236 | 0.22 | 1 | HC_vs_MS.Trt_B |
| RP11-701H2 | 0.54011 | 0.27917 | 0.109 | 0.1  | 1 | HC_vs_MS.Trt_B |
| SEC61B     | 0.54028 | -0.2853 | 0.159 | 0.17 | 1 | HC_vs_MS.Trt_B |
| CREBZF     | 0.54117 | -0.4513 | 0.167 | 0.15 | 1 | HC_vs_MS.Trt_B |
| ARPC1A     | 0.54395 | -0.312  | 0.23  | 0.22 | 1 | HC_vs_MS.Trt_B |
| LRRC56     | 0.54498 | 0.52293 | 0.38  | 0.38 | 1 | HC_vs_MS.Trt_B |
| IFI27L2    | 0.54984 | -0.8044 | 0.142 | 0.13 | 1 | HC_vs_MS.Trt_B |
| CEP120     | 0.5506  | -1.0442 | 0.094 | 0.11 | 1 | HC_vs_MS.Trt_B |
| RHBDD2     | 0.5519  | -0.3352 | 0.226 | 0.21 | 1 | HC_vs_MS.Trt_B |
| MFSD10     | 0.55195 | -0.4193 | 0.107 | 0.12 | 1 | HC_vs_MS.Trt_B |
| RP11-411B6 | 0.55447 | 0.58215 | 0.219 | 0.21 | 1 | HC_vs_MS.Trt_B |
| S100A11    | 0.55564 | -0.35   | 0.301 | 0.28 | 1 | HC_vs_MS.Trt_B |
| EMD        | 0.55844 | 0.33454 | 0.194 | 0.19 | 1 | HC_vs_MS.Trt_B |
| VDAC2      | 0.55856 | -0.5062 | 0.235 | 0.25 | 1 | HC_vs_MS.Trt_B |
| IMPDH1     | 0.55889 | -0.6627 | 0.101 | 0.09 | 1 | HC_vs_MS.Trt_B |
| RBX1       | 0.56432 | -0.7399 | 0.23  | 0.24 | 1 | HC_vs_MS.Trt_B |
| ECSIT      | 0.56548 | -0.325  | 0.365 | 0.35 | 1 | HC_vs_MS.Trt_B |

|            |         |         |       |      |   |                |
|------------|---------|---------|-------|------|---|----------------|
| UBXN11     | 0.56587 | -0.4951 | 0.138 | 0.15 | 1 | HC_vs_MS.Trt_B |
| SCAND1     | 0.56715 | -0.3839 | 0.188 | 0.17 | 1 | HC_vs_MS.Trt_B |
| NDUFA1     | 0.56853 | -0.5768 | 0.209 | 0.22 | 1 | HC_vs_MS.Trt_B |
| BLVRA      | 0.56895 | -0.3137 | 0.103 | 0.11 | 1 | HC_vs_MS.Trt_B |
| DCUN1D3    | 0.57021 | 0.7153  | 0.139 | 0.13 | 1 | HC_vs_MS.Trt_B |
| CWC15      | 0.57066 | -0.4784 | 0.19  | 0.2  | 1 | HC_vs_MS.Trt_B |
| RNF123     | 0.57118 | -0.3807 | 0.1   | 0.11 | 1 | HC_vs_MS.Trt_B |
| STON1      | 0.57353 | -0.9519 | 0.301 | 0.28 | 1 | HC_vs_MS.Trt_B |
| POLR2J     | 0.57542 | -0.4244 | 0.152 | 0.17 | 1 | HC_vs_MS.Trt_B |
| DAXX       | 0.57623 | -0.5466 | 0.18  | 0.19 | 1 | HC_vs_MS.Trt_B |
| AMPH       | 0.57638 | -0.5164 | 0.136 | 0.13 | 1 | HC_vs_MS.Trt_B |
| UNG        | 0.57817 | 0.55738 | 0.2   | 0.19 | 1 | HC_vs_MS.Trt_B |
| ZNF658     | 0.58071 | -0.8458 | 0.175 | 0.16 | 1 | HC_vs_MS.Trt_B |
| EHBP1      | 0.58075 | -0.6674 | 0.354 | 0.34 | 1 | HC_vs_MS.Trt_B |
| UCHL3      | 0.58375 | -0.5272 | 0.104 | 0.09 | 1 | HC_vs_MS.Trt_B |
| EWSR1      | 0.58424 | -0.2887 | 0.499 | 0.47 | 1 | HC_vs_MS.Trt_B |
| ROBO4      | 0.58496 | -0.2676 | 0.133 | 0.15 | 1 | HC_vs_MS.Trt_B |
| ZNF93      | 0.58807 | -0.7837 | 0.532 | 0.5  | 1 | HC_vs_MS.Trt_B |
| RGS10      | 0.58912 | -0.3126 | 0.177 | 0.17 | 1 | HC_vs_MS.Trt_B |
| COPS9      | 0.58968 | -0.5191 | 0.113 | 0.12 | 1 | HC_vs_MS.Trt_B |
| CTD-2370N5 | 0.59188 | -0.252  | 0.101 | 0.09 | 1 | HC_vs_MS.Trt_B |
| IFIT3      | 0.59505 | 0.45533 | 0.43  | 0.47 | 1 | HC_vs_MS.Trt_B |
| RIC1       | 0.59505 | 0.56818 | 0.103 | 0.1  | 1 | HC_vs_MS.Trt_B |
| MAN1C1     | 0.59525 | -0.2956 | 0.867 | 0.83 | 1 | HC_vs_MS.Trt_B |
| HERPUD1    | 0.59701 | -0.6369 | 0.643 | 0.63 | 1 | HC_vs_MS.Trt_B |
| CCNG2      | 0.59791 | -0.4841 | 0.265 | 0.25 | 1 | HC_vs_MS.Trt_B |
| CAMTA1     | 0.60116 | -0.6354 | 0.116 | 0.11 | 1 | HC_vs_MS.Trt_B |
| SELT       | 0.602   | -0.3705 | 0.306 | 0.29 | 1 | HC_vs_MS.Trt_B |
| SRSF6      | 0.60201 | -0.456  | 0.607 | 0.6  | 1 | HC_vs_MS.Trt_B |
| PDE6D      | 0.6022  | -0.3772 | 0.1   | 0.11 | 1 | HC_vs_MS.Trt_B |
| GNG5       | 0.6025  | -0.5272 | 0.18  | 0.19 | 1 | HC_vs_MS.Trt_B |
| FNTB       | 0.60311 | 0.64082 | 0.126 | 0.12 | 1 | HC_vs_MS.Trt_B |
| LIAS       | 0.60342 | 0.38445 | 0.094 | 0.11 | 1 | HC_vs_MS.Trt_B |
| ADSSL1     | 0.60727 | 0.26256 | 0.257 | 0.24 | 1 | HC_vs_MS.Trt_B |
| ATP6V0E1   | 0.60773 | -0.5091 | 0.27  | 0.24 | 1 | HC_vs_MS.Trt_B |
| THEMIS     | 0.60784 | 0.42457 | 0.194 | 0.18 | 1 | HC_vs_MS.Trt_B |
| QARS       | 0.60852 | -0.3279 | 0.177 | 0.19 | 1 | HC_vs_MS.Trt_B |
| MGST2      | 0.60868 | -0.4223 | 0.157 | 0.15 | 1 | HC_vs_MS.Trt_B |
| SDHB       | 0.61354 | -0.6987 | 0.112 | 0.12 | 1 | HC_vs_MS.Trt_B |
| SRI        | 0.61516 | -0.5997 | 0.367 | 0.34 | 1 | HC_vs_MS.Trt_B |

|            |         |         |       |      |   |                |
|------------|---------|---------|-------|------|---|----------------|
| SH3RF2     | 0.6164  | 0.26231 | 0.165 | 0.16 | 1 | HC_vs_MS.Trt_B |
| TXN        | 0.61641 | -0.3903 | 0.19  | 0.17 | 1 | HC_vs_MS.Trt_B |
| ATG5       | 0.61849 | -0.2872 | 0.116 | 0.13 | 1 | HC_vs_MS.Trt_B |
| PUS3       | 0.62098 | 0.5735  | 0.31  | 0.3  | 1 | HC_vs_MS.Trt_B |
| DUSP11     | 0.62158 | -0.3133 | 0.519 | 0.52 | 1 | HC_vs_MS.Trt_B |
| ATP5L      | 0.62422 | -0.5071 | 0.375 | 0.37 | 1 | HC_vs_MS.Trt_B |
| HEXDC      | 0.62423 | -0.4042 | 0.338 | 0.31 | 1 | HC_vs_MS.Trt_B |
| DNAJB11    | 0.62472 | -0.2804 | 0.142 | 0.13 | 1 | HC_vs_MS.Trt_B |
| CRYGS      | 0.62683 | -1.1184 | 0.217 | 0.2  | 1 | HC_vs_MS.Trt_B |
| HMG2       | 0.62744 | -0.3195 | 0.6   | 0.59 | 1 | HC_vs_MS.Trt_B |
| AC012314.1 | 0.6312  | -0.2953 | 0.117 | 0.12 | 1 | HC_vs_MS.Trt_B |
| AC012314.1 | 0.6312  | -0.2953 | 0.117 | 0.12 | 1 | HC_vs_MS.Trt_B |
| AC012314.1 | 0.6312  | -0.2953 | 0.117 | 0.12 | 1 | HC_vs_MS.Trt_B |
| AC012314.1 | 0.6312  | -0.2953 | 0.117 | 0.12 | 1 | HC_vs_MS.Trt_B |
| AC012314.3 | 0.6312  | -0.2953 | 0.117 | 0.12 | 1 | HC_vs_MS.Trt_B |
| AC012314.6 | 0.6312  | -0.2953 | 0.117 | 0.12 | 1 | HC_vs_MS.Trt_B |
| AC012314.7 | 0.6312  | -0.2953 | 0.117 | 0.12 | 1 | HC_vs_MS.Trt_B |
| AC012314.9 | 0.6312  | -0.2953 | 0.117 | 0.12 | 1 | HC_vs_MS.Trt_B |
| CASP2      | 0.63245 | -0.5194 | 0.793 | 0.73 | 1 | HC_vs_MS.Trt_B |
| ADCY1      | 0.63259 | 0.50803 | 0.135 | 0.13 | 1 | HC_vs_MS.Trt_B |
| MED23      | 0.63265 | -0.3339 | 0.213 | 0.2  | 1 | HC_vs_MS.Trt_B |
| RPF1       | 0.63274 | -0.904  | 0.232 | 0.21 | 1 | HC_vs_MS.Trt_B |
| SELK       | 0.63334 | -0.8022 | 0.342 | 0.33 | 1 | HC_vs_MS.Trt_B |
| XPO4       | 0.63765 | -0.2862 | 0.112 | 0.1  | 1 | HC_vs_MS.Trt_B |
| CLOCK      | 0.63822 | -0.4209 | 0.123 | 0.12 | 1 | HC_vs_MS.Trt_B |
| ACAT2      | 0.63977 | -0.5792 | 0.22  | 0.21 | 1 | HC_vs_MS.Trt_B |
| HDDC3      | 0.6409  | 0.44149 | 0.306 | 0.29 | 1 | HC_vs_MS.Trt_B |
| GK         | 0.64103 | -1.3677 | 0.126 | 0.13 | 1 | HC_vs_MS.Trt_B |
| NCF4       | 0.6421  | -0.6234 | 0.161 | 0.15 | 1 | HC_vs_MS.Trt_B |
| EIF2S1     | 0.64303 | -0.6687 | 0.258 | 0.23 | 1 | HC_vs_MS.Trt_B |
| NHP2       | 0.64514 | -0.2771 | 0.172 | 0.16 | 1 | HC_vs_MS.Trt_B |
| VAPB       | 0.64638 | 0.31215 | 0.157 | 0.15 | 1 | HC_vs_MS.Trt_B |
| ZNF586     | 0.6471  | -0.3549 | 0.149 | 0.14 | 1 | HC_vs_MS.Trt_B |
| ZNF146     | 0.6485  | -0.4303 | 0.164 | 0.15 | 1 | HC_vs_MS.Trt_B |
| SDAD1      | 0.64982 | -0.3056 | 0.138 | 0.13 | 1 | HC_vs_MS.Trt_B |
| FAM134A    | 0.65143 | -0.5732 | 0.383 | 0.39 | 1 | HC_vs_MS.Trt_B |
| POLE4      | 0.65147 | -0.3219 | 0.097 | 0.11 | 1 | HC_vs_MS.Trt_B |
| JAKMIP1    | 0.65251 | -0.388  | 0.175 | 0.16 | 1 | HC_vs_MS.Trt_B |
| FBXL3      | 0.65286 | -0.5934 | 0.104 | 0.1  | 1 | HC_vs_MS.Trt_B |
| MIB1       | 0.65294 | 0.34029 | 0.101 | 0.09 | 1 | HC_vs_MS.Trt_B |

|           |         |         |       |      |   |                |
|-----------|---------|---------|-------|------|---|----------------|
| SCMH1     | 0.65511 | 0.29844 | 0.104 | 0.1  | 1 | HC_vs_MS.Trt_B |
| REXO2     | 0.65766 | -0.434  | 0.139 | 0.15 | 1 | HC_vs_MS.Trt_B |
| ASB13     | 0.65873 | -1.0372 | 0.097 | 0.11 | 1 | HC_vs_MS.Trt_B |
| IL17RC    | 0.65914 | -0.5543 | 0.336 | 0.33 | 1 | HC_vs_MS.Trt_B |
| ERH       | 0.66177 | -0.2662 | 0.201 | 0.19 | 1 | HC_vs_MS.Trt_B |
| ALDH9A1   | 0.66356 | -0.3726 | 0.11  | 0.12 | 1 | HC_vs_MS.Trt_B |
| UBQLN1    | 0.6654  | 0.28614 | 0.177 | 0.17 | 1 | HC_vs_MS.Trt_B |
| OSMR      | 0.66723 | -0.5795 | 0.49  | 0.5  | 1 | HC_vs_MS.Trt_B |
| CTIF      | 0.66894 | 0.90828 | 0.162 | 0.16 | 1 | HC_vs_MS.Trt_B |
| GPM6B     | 0.66996 | -0.3438 | 0.114 | 0.11 | 1 | HC_vs_MS.Trt_B |
| SLC25A5   | 0.67055 | -0.5626 | 0.278 | 0.26 | 1 | HC_vs_MS.Trt_B |
| USP9Y     | 0.67239 | 0.85575 | 0.235 | 0.22 | 1 | HC_vs_MS.Trt_B |
| HIST1H2AG | 0.67561 | 0.79214 | 0.278 | 0.28 | 1 | HC_vs_MS.Trt_B |
| PRDX2     | 0.67675 | -0.6377 | 0.212 | 0.22 | 1 | HC_vs_MS.Trt_B |
| ITPA      | 0.67769 | -0.3388 | 0.113 | 0.11 | 1 | HC_vs_MS.Trt_B |
| GMMPR     | 0.67814 | -0.6053 | 0.348 | 0.32 | 1 | HC_vs_MS.Trt_B |
| APOL3     | 0.67865 | 0.37484 | 0.199 | 0.19 | 1 | HC_vs_MS.Trt_B |
| ATP1B1    | 0.67913 | 0.43011 | 0.161 | 0.17 | 1 | HC_vs_MS.Trt_B |
| UQCRFS1   | 0.67993 | -0.3498 | 0.229 | 0.21 | 1 | HC_vs_MS.Trt_B |
| DEDD2     | 0.68073 | -0.4394 | 0.312 | 0.3  | 1 | HC_vs_MS.Trt_B |
| IMP4      | 0.6832  | -0.3023 | 0.165 | 0.17 | 1 | HC_vs_MS.Trt_B |
| ARGLU1    | 0.687   | -0.4052 | 0.667 | 0.61 | 1 | HC_vs_MS.Trt_B |
| POMP      | 0.69018 | -0.5956 | 0.167 | 0.17 | 1 | HC_vs_MS.Trt_B |
| UPK1B     | 0.69085 | -0.2696 | 0.397 | 0.41 | 1 | HC_vs_MS.Trt_B |
| UBASH3A   | 0.69181 | -0.5841 | 0.183 | 0.17 | 1 | HC_vs_MS.Trt_B |
| TTC39C    | 0.69232 | -0.496  | 0.819 | 0.76 | 1 | HC_vs_MS.Trt_B |
| CLIC1     | 0.69249 | -0.4994 | 0.543 | 0.53 | 1 | HC_vs_MS.Trt_B |
| KCNAB3    | 0.69278 | -0.9851 | 0.343 | 0.33 | 1 | HC_vs_MS.Trt_B |
| SRRT      | 0.69334 | 0.3753  | 0.145 | 0.14 | 1 | HC_vs_MS.Trt_B |
| NME1      | 0.69408 | -0.4318 | 0.542 | 0.58 | 1 | HC_vs_MS.Trt_B |
| CALHM2    | 0.69602 | -0.3172 | 0.122 | 0.13 | 1 | HC_vs_MS.Trt_B |
| ADNP      | 0.69751 | -0.534  | 0.438 | 0.42 | 1 | HC_vs_MS.Trt_B |
| CYB5R3    | 0.70436 | -0.5001 | 0.474 | 0.45 | 1 | HC_vs_MS.Trt_B |
| PSMA7     | 0.70485 | -0.4787 | 0.367 | 0.36 | 1 | HC_vs_MS.Trt_B |
| HLA-DRA   | 0.70609 | -0.6379 | 0.116 | 0.12 | 1 | HC_vs_MS.Trt_B |
| RPL36AL   | 0.70713 | -0.3409 | 0.467 | 0.44 | 1 | HC_vs_MS.Trt_B |
| THOC7     | 0.7084  | -0.6083 | 0.145 | 0.13 | 1 | HC_vs_MS.Trt_B |
| PNN       | 0.70905 | -0.4421 | 0.246 | 0.25 | 1 | HC_vs_MS.Trt_B |
| RPE       | 0.71319 | -0.4398 | 0.288 | 0.28 | 1 | HC_vs_MS.Trt_B |
| CLEC18A   | 0.71371 | 0.62635 | 0.281 | 0.27 | 1 | HC_vs_MS.Trt_B |

|         |         |         |       |      |   |                |
|---------|---------|---------|-------|------|---|----------------|
| EIF6    | 0.71535 | -0.4229 | 0.125 | 0.13 | 1 | HC_vs_MS.Trt_B |
| KIF20B  | 0.7161  | -0.5375 | 0.119 | 0.11 | 1 | HC_vs_MS.Trt_B |
| DBN1    | 0.71725 | 0.41175 | 0.217 | 0.21 | 1 | HC_vs_MS.Trt_B |
| PER1    | 0.71814 | 0.30326 | 0.332 | 0.34 | 1 | HC_vs_MS.Trt_B |
| RUVBL1  | 0.71867 | -0.3746 | 0.643 | 0.63 | 1 | HC_vs_MS.Trt_B |
| MDH2    | 0.71968 | -0.3656 | 0.18  | 0.19 | 1 | HC_vs_MS.Trt_B |
| ACAD9   | 0.71987 | -0.6002 | 0.248 | 0.24 | 1 | HC_vs_MS.Trt_B |
| HMGB2   | 0.72067 | -0.3162 | 0.22  | 0.21 | 1 | HC_vs_MS.Trt_B |
| BIN1    | 0.72095 | -0.443  | 0.262 | 0.26 | 1 | HC_vs_MS.Trt_B |
| GTF2F1  | 0.72243 | -1.0197 | 0.268 | 0.25 | 1 | HC_vs_MS.Trt_B |
| BAZ1B   | 0.72318 | -0.2614 | 0.168 | 0.16 | 1 | HC_vs_MS.Trt_B |
| CEACAM1 | 0.72326 | 0.87368 | 0.79  | 0.82 | 1 | HC_vs_MS.Trt_B |
| RBBP6   | 0.72382 | -0.4584 | 0.22  | 0.21 | 1 | HC_vs_MS.Trt_B |
| EDEM3   | 0.72492 | -0.3301 | 0.274 | 0.27 | 1 | HC_vs_MS.Trt_B |
| CEP128  | 0.7274  | -0.4053 | 0.183 | 0.17 | 1 | HC_vs_MS.Trt_B |
| ADHFE1  | 0.72812 | -0.5579 | 0.129 | 0.12 | 1 | HC_vs_MS.Trt_B |
| TTC1    | 0.72867 | -0.6243 | 0.151 | 0.16 | 1 | HC_vs_MS.Trt_B |
| PTPN6   | 0.73243 | -0.3198 | 0.328 | 0.31 | 1 | HC_vs_MS.Trt_B |
| TMEM104 | 0.73263 | -0.2713 | 0.1   | 0.11 | 1 | HC_vs_MS.Trt_B |
| MIF     | 0.73394 | -0.6112 | 0.361 | 0.35 | 1 | HC_vs_MS.Trt_B |
| FAM96B  | 0.73537 | -0.4901 | 0.172 | 0.16 | 1 | HC_vs_MS.Trt_B |
| PVRIG   | 0.73558 | -0.5279 | 0.267 | 0.25 | 1 | HC_vs_MS.Trt_B |
| AP1G2   | 0.73583 | -0.2926 | 0.661 | 0.61 | 1 | HC_vs_MS.Trt_B |
| ASF1A   | 0.7368  | -0.6534 | 0.141 | 0.13 | 1 | HC_vs_MS.Trt_B |
| MTG1    | 0.73727 | -0.2694 | 0.148 | 0.14 | 1 | HC_vs_MS.Trt_B |
| ARL6IP6 | 0.73792 | -0.2833 | 0.103 | 0.1  | 1 | HC_vs_MS.Trt_B |
| RECQL   | 0.73811 | 0.30821 | 0.128 | 0.12 | 1 | HC_vs_MS.Trt_B |
| IFITM1  | 0.73925 | -0.2578 | 0.583 | 0.54 | 1 | HC_vs_MS.Trt_B |
| CXCR3   | 0.73937 | -0.5017 | 0.103 | 0.1  | 1 | HC_vs_MS.Trt_B |
| WASF2   | 0.74242 | -0.2518 | 0.509 | 0.48 | 1 | HC_vs_MS.Trt_B |
| MRPS34  | 0.74249 | -0.3757 | 0.138 | 0.14 | 1 | HC_vs_MS.Trt_B |
| RSL24D1 | 0.74358 | -0.4274 | 0.249 | 0.24 | 1 | HC_vs_MS.Trt_B |
| ZNF211  | 0.74644 | -0.5984 | 0.152 | 0.16 | 1 | HC_vs_MS.Trt_B |
| MPV17L2 | 0.74823 | -0.8949 | 0.174 | 0.16 | 1 | HC_vs_MS.Trt_B |
| ZC2HC1C | 0.74984 | 0.45847 | 0.109 | 0.1  | 1 | HC_vs_MS.Trt_B |
| CCHCR1  | 0.7505  | -0.5615 | 0.293 | 0.29 | 1 | HC_vs_MS.Trt_B |
| MRPL41  | 0.75219 | -0.7185 | 0.128 | 0.13 | 1 | HC_vs_MS.Trt_B |
| ZNF236  | 0.75459 | -0.4044 | 0.106 | 0.11 | 1 | HC_vs_MS.Trt_B |
| FAM96A  | 0.75478 | -0.3734 | 0.312 | 0.3  | 1 | HC_vs_MS.Trt_B |
| HOMEZ   | 0.75478 | -0.6681 | 0.183 | 0.19 | 1 | HC_vs_MS.Trt_B |



|            |         |         |       |      |   |                |
|------------|---------|---------|-------|------|---|----------------|
| AATF       | 0.75597 | -0.3126 | 0.165 | 0.16 | 1 | HC_vs_MS.Trt_B |
| LSM2       | 0.757   | -0.2589 | 0.125 | 0.12 | 1 | HC_vs_MS.Trt_B |
| RRAGD      | 0.75773 | 0.37302 | 0.119 | 0.11 | 1 | HC_vs_MS.Trt_B |
| ARID4A     | 0.75869 | -0.3809 | 0.278 | 0.27 | 1 | HC_vs_MS.Trt_B |
| NOMO1      | 0.76268 | 0.51463 | 0.116 | 0.11 | 1 | HC_vs_MS.Trt_B |
| E2F6       | 0.76309 | 0.97152 | 0.217 | 0.22 | 1 | HC_vs_MS.Trt_B |
| MT1X       | 0.76347 | -0.6662 | 0.101 | 0.1  | 1 | HC_vs_MS.Trt_B |
| ADAM19     | 0.7659  | -0.3198 | 0.319 | 0.31 | 1 | HC_vs_MS.Trt_B |
| SERF2      | 0.76628 | -0.4493 | 0.799 | 0.69 | 1 | HC_vs_MS.Trt_B |
| ZNF92      | 0.76777 | 0.5733  | 0.1   | 0.11 | 1 | HC_vs_MS.Trt_B |
| GLTP       | 0.76912 | -0.2672 | 0.583 | 0.58 | 1 | HC_vs_MS.Trt_B |
| COX6A1     | 0.76981 | -0.3424 | 0.113 | 0.11 | 1 | HC_vs_MS.Trt_B |
| TRAF2      | 0.77014 | -0.2813 | 0.161 | 0.15 | 1 | HC_vs_MS.Trt_B |
| MLF2       | 0.77073 | -0.3094 | 0.152 | 0.14 | 1 | HC_vs_MS.Trt_B |
| TBC1D13    | 0.77093 | 0.47667 | 0.109 | 0.12 | 1 | HC_vs_MS.Trt_B |
| CTNNB1     | 0.77099 | -0.4572 | 0.532 | 0.5  | 1 | HC_vs_MS.Trt_B |
| RP11-599B1 | 0.7719  | -0.2861 | 0.259 | 0.25 | 1 | HC_vs_MS.Trt_B |
| STOM       | 0.77639 | -0.5119 | 0.577 | 0.53 | 1 | HC_vs_MS.Trt_B |
| PPP2R5A    | 0.77726 | -0.4097 | 0.187 | 0.19 | 1 | HC_vs_MS.Trt_B |
| TBPL1      | 0.77925 | -0.7016 | 0.188 | 0.18 | 1 | HC_vs_MS.Trt_B |
| TMED4      | 0.78052 | -0.3416 | 0.913 | 0.86 | 1 | HC_vs_MS.Trt_B |
| PDCD10     | 0.78083 | -0.532  | 0.174 | 0.17 | 1 | HC_vs_MS.Trt_B |
| MRPS14     | 0.78093 | -0.8647 | 0.116 | 0.11 | 1 | HC_vs_MS.Trt_B |
| MCM7       | 0.78375 | -0.4015 | 0.18  | 0.18 | 1 | HC_vs_MS.Trt_B |
| POLR2J2    | 0.78731 | -0.4108 | 0.261 | 0.27 | 1 | HC_vs_MS.Trt_B |
| ATG9B      | 0.7875  | 0.29092 | 0.122 | 0.12 | 1 | HC_vs_MS.Trt_B |
| MAP3K3     | 0.78875 | -0.2536 | 0.142 | 0.15 | 1 | HC_vs_MS.Trt_B |
| ANP32E     | 0.7892  | -0.4316 | 0.384 | 0.37 | 1 | HC_vs_MS.Trt_B |
| ARHGAP44   | 0.7918  | 0.54941 | 0.242 | 0.24 | 1 | HC_vs_MS.Trt_B |
| TOMM5      | 0.79573 | -0.4396 | 0.135 | 0.14 | 1 | HC_vs_MS.Trt_B |
| PLA2G4E    | 0.79586 | -0.3421 | 0.114 | 0.11 | 1 | HC_vs_MS.Trt_B |
| GRAMD1B    | 0.79586 | -0.4247 | 0.299 | 0.29 | 1 | HC_vs_MS.Trt_B |
| SAFB       | 0.79625 | -0.3428 | 0.345 | 0.35 | 1 | HC_vs_MS.Trt_B |
| MLX        | 0.79666 | -0.2716 | 0.399 | 0.41 | 1 | HC_vs_MS.Trt_B |
| DVL3       | 0.79793 | -0.5104 | 0.235 | 0.23 | 1 | HC_vs_MS.Trt_B |
| BTBD8      | 0.79793 | -0.6482 | 0.293 | 0.29 | 1 | HC_vs_MS.Trt_B |
| TRMT1      | 0.7992  | -0.2787 | 0.129 | 0.12 | 1 | HC_vs_MS.Trt_B |
| TCEB2      | 0.8029  | -0.4625 | 0.301 | 0.28 | 1 | HC_vs_MS.Trt_B |
| KCNJ3      | 0.80403 | 0.29926 | 0.214 | 0.22 | 1 | HC_vs_MS.Trt_B |
| RAB5A      | 0.80627 | -0.5476 | 0.113 | 0.11 | 1 | HC_vs_MS.Trt_B |

|           |         |         |       |      |   |                |
|-----------|---------|---------|-------|------|---|----------------|
| THOC1     | 0.8075  | 0.37019 | 0.19  | 0.19 | 1 | HC_vs_MS.Trt_B |
| ATP6V1G1  | 0.80756 | -0.4783 | 0.426 | 0.4  | 1 | HC_vs_MS.Trt_B |
| NPM1      | 0.81214 | -0.35   | 0.648 | 0.58 | 1 | HC_vs_MS.Trt_B |
| PHPT1     | 0.81231 | -0.6846 | 0.106 | 0.11 | 1 | HC_vs_MS.Trt_B |
| ZNF836    | 0.81334 | -0.8247 | 0.161 | 0.16 | 1 | HC_vs_MS.Trt_B |
| ZNF641    | 0.81468 | -0.2796 | 0.383 | 0.37 | 1 | HC_vs_MS.Trt_B |
| UBE2L3    | 0.81591 | -0.4069 | 0.241 | 0.23 | 1 | HC_vs_MS.Trt_B |
| ZNF14     | 0.81595 | -0.3654 | 0.32  | 0.31 | 1 | HC_vs_MS.Trt_B |
| H2AFZ     | 0.81712 | -0.3831 | 0.333 | 0.31 | 1 | HC_vs_MS.Trt_B |
| TCEAL8    | 0.8173  | -0.3705 | 0.109 | 0.11 | 1 | HC_vs_MS.Trt_B |
| GNG10     | 0.81877 | -1.0673 | 0.11  | 0.11 | 1 | HC_vs_MS.Trt_B |
| TMEM173   | 0.81939 | -0.4372 | 0.201 | 0.19 | 1 | HC_vs_MS.Trt_B |
| DHX35     | 0.81941 | -0.4381 | 0.339 | 0.33 | 1 | HC_vs_MS.Trt_B |
| PSMD7     | 0.82067 | -0.4314 | 0.275 | 0.27 | 1 | HC_vs_MS.Trt_B |
| CKLF      | 0.82077 | -0.2701 | 0.148 | 0.14 | 1 | HC_vs_MS.Trt_B |
| CASP1     | 0.82417 | -0.4325 | 0.196 | 0.19 | 1 | HC_vs_MS.Trt_B |
| TM9SF3    | 0.82642 | -0.3434 | 0.11  | 0.11 | 1 | HC_vs_MS.Trt_B |
| DDIAS     | 0.82912 | 0.41437 | 0.355 | 0.35 | 1 | HC_vs_MS.Trt_B |
| NDUFC1    | 0.83028 | -0.3279 | 0.2   | 0.21 | 1 | HC_vs_MS.Trt_B |
| SNRPD2    | 0.83171 | -0.6707 | 0.51  | 0.48 | 1 | HC_vs_MS.Trt_B |
| CNOT8     | 0.83205 | -0.3199 | 0.225 | 0.22 | 1 | HC_vs_MS.Trt_B |
| UQCR10    | 0.83261 | -0.8671 | 0.288 | 0.28 | 1 | HC_vs_MS.Trt_B |
| RPS20     | 0.83665 | -0.2957 | 0.791 | 0.76 | 1 | HC_vs_MS.Trt_B |
| BANF1     | 0.83677 | -0.5007 | 0.181 | 0.18 | 1 | HC_vs_MS.Trt_B |
| PITPNB    | 0.83677 | -0.4113 | 0.161 | 0.17 | 1 | HC_vs_MS.Trt_B |
| NOL7      | 0.83696 | -0.3384 | 0.199 | 0.19 | 1 | HC_vs_MS.Trt_B |
| MAP1LC3B2 | 0.83705 | -0.6664 | 0.206 | 0.2  | 1 | HC_vs_MS.Trt_B |
| NPEPL1    | 0.83935 | -0.6453 | 0.11  | 0.11 | 1 | HC_vs_MS.Trt_B |
| MYL12B    | 0.83958 | -0.2565 | 0.459 | 0.45 | 1 | HC_vs_MS.Trt_B |
| ACSL6     | 0.84192 | -0.385  | 0.509 | 0.55 | 1 | HC_vs_MS.Trt_B |
| ARL6IP4   | 0.84569 | -0.4064 | 0.284 | 0.28 | 1 | HC_vs_MS.Trt_B |
| DHX9      | 0.8479  | -0.4538 | 0.194 | 0.19 | 1 | HC_vs_MS.Trt_B |
| PNPLA6    | 0.84911 | -0.3858 | 0.126 | 0.13 | 1 | HC_vs_MS.Trt_B |
| FAM172A   | 0.84937 | -0.3017 | 0.11  | 0.11 | 1 | HC_vs_MS.Trt_B |
| MKRN3     | 0.85232 | 0.97805 | 0.452 | 0.46 | 1 | HC_vs_MS.Trt_B |
| MVB12A    | 0.85237 | -0.5054 | 0.514 | 0.5  | 1 | HC_vs_MS.Trt_B |
| ATP6V0B   | 0.85724 | -0.2732 | 0.145 | 0.15 | 1 | HC_vs_MS.Trt_B |
| ATP5G1    | 0.85753 | -0.484  | 0.228 | 0.23 | 1 | HC_vs_MS.Trt_B |
| PSMB5     | 0.85768 | -0.2956 | 0.099 | 0.1  | 1 | HC_vs_MS.Trt_B |
| KLHL3     | 0.858   | -0.5751 | 0.184 | 0.19 | 1 | HC_vs_MS.Trt_B |

|           |         |         |       |      |   |                |
|-----------|---------|---------|-------|------|---|----------------|
| RNF13     | 0.85982 | -0.7176 | 0.135 | 0.13 | 1 | HC_vs_MS.Trt_B |
| PSMB8     | 0.86011 | -0.2844 | 0.346 | 0.34 | 1 | HC_vs_MS.Trt_B |
| SNRPC     | 0.86389 | -0.3629 | 0.172 | 0.18 | 1 | HC_vs_MS.Trt_B |
| NUDT7     | 0.87024 | -0.4303 | 0.177 | 0.18 | 1 | HC_vs_MS.Trt_B |
| SFT2D1    | 0.8727  | -0.5488 | 0.307 | 0.31 | 1 | HC_vs_MS.Trt_B |
| PIP4K2B   | 0.87291 | -1.1766 | 0.107 | 0.1  | 1 | HC_vs_MS.Trt_B |
| SRP9      | 0.87526 | -0.5843 | 0.345 | 0.34 | 1 | HC_vs_MS.Trt_B |
| MORF4L2   | 0.87924 | -0.356  | 0.155 | 0.16 | 1 | HC_vs_MS.Trt_B |
| AKIRIN2   | 0.8799  | -0.2867 | 0.132 | 0.14 | 1 | HC_vs_MS.Trt_B |
| RNF43     | 0.88037 | -0.7798 | 0.296 | 0.28 | 1 | HC_vs_MS.Trt_B |
| CHKB      | 0.8811  | -0.7973 | 0.186 | 0.19 | 1 | HC_vs_MS.Trt_B |
| VAMP8     | 0.88772 | -0.5324 | 0.233 | 0.23 | 1 | HC_vs_MS.Trt_B |
| SH2D1A    | 0.89053 | -0.4377 | 0.159 | 0.16 | 1 | HC_vs_MS.Trt_B |
| PDIA6     | 0.89096 | -0.3848 | 0.177 | 0.17 | 1 | HC_vs_MS.Trt_B |
| ZNF302    | 0.89558 | -0.4551 | 0.426 | 0.42 | 1 | HC_vs_MS.Trt_B |
| NDUFB7    | 0.89769 | -0.5474 | 0.155 | 0.15 | 1 | HC_vs_MS.Trt_B |
| TAF7      | 0.90261 | -0.4681 | 0.291 | 0.29 | 1 | HC_vs_MS.Trt_B |
| AIP       | 0.90516 | -0.2938 | 0.228 | 0.22 | 1 | HC_vs_MS.Trt_B |
| CXorf57   | 0.90635 | -1.6091 | 0.11  | 0.11 | 1 | HC_vs_MS.Trt_B |
| CNN3      | 0.90808 | 0.39524 | 0.165 | 0.16 | 1 | HC_vs_MS.Trt_B |
| PPT1      | 0.90887 | -0.4009 | 0.168 | 0.17 | 1 | HC_vs_MS.Trt_B |
| HDHD2     | 0.9117  | -0.613  | 0.114 | 0.11 | 1 | HC_vs_MS.Trt_B |
| SMG7      | 0.91629 | -0.3804 | 0.162 | 0.16 | 1 | HC_vs_MS.Trt_B |
| CCT4      | 0.91699 | -0.3594 | 0.18  | 0.18 | 1 | HC_vs_MS.Trt_B |
| B3GAT2    | 0.91855 | 0.48944 | 0.151 | 0.15 | 1 | HC_vs_MS.Trt_B |
| ZCRB1     | 0.92007 | -0.4711 | 0.146 | 0.14 | 1 | HC_vs_MS.Trt_B |
| LBR       | 0.92088 | -0.3165 | 0.206 | 0.2  | 1 | HC_vs_MS.Trt_B |
| TEX264    | 0.92183 | -0.321  | 0.154 | 0.15 | 1 | HC_vs_MS.Trt_B |
| TRAPPC13  | 0.92364 | 0.37685 | 0.145 | 0.15 | 1 | HC_vs_MS.Trt_B |
| ZNF180    | 0.92425 | -0.4197 | 0.332 | 0.34 | 1 | HC_vs_MS.Trt_B |
| BCAP31    | 0.9254  | 0.28206 | 0.122 | 0.12 | 1 | HC_vs_MS.Trt_B |
| TMEM256-P | 0.92984 | -0.2573 | 0.514 | 0.48 | 1 | HC_vs_MS.Trt_B |
| OPA1      | 0.92986 | 0.3454  | 0.122 | 0.12 | 1 | HC_vs_MS.Trt_B |
| CCDC59    | 0.93211 | -0.2786 | 0.114 | 0.11 | 1 | HC_vs_MS.Trt_B |
| EFHB      | 0.93376 | -0.3147 | 0.249 | 0.25 | 1 | HC_vs_MS.Trt_B |
| SDC3      | 0.93381 | 0.38095 | 0.268 | 0.27 | 1 | HC_vs_MS.Trt_B |
| ANKLE1    | 0.93978 | -0.2948 | 0.154 | 0.16 | 1 | HC_vs_MS.Trt_B |
| OSER1     | 0.9444  | -0.747  | 0.157 | 0.16 | 1 | HC_vs_MS.Trt_B |
| LONP1     | 0.94535 | -0.4745 | 0.488 | 0.5  | 1 | HC_vs_MS.Trt_B |
| ASIC4     | 0.94542 | 0.34553 | 0.21  | 0.21 | 1 | HC_vs_MS.Trt_B |

|           |          |         |       |      |          |                  |
|-----------|----------|---------|-------|------|----------|------------------|
| LYPLA2    | 0.94638  | -0.3388 | 0.135 | 0.14 | 1        | HC_vs_MS.Trt_B   |
| AP1S2     | 0.94871  | -0.4477 | 0.136 | 0.14 | 1        | HC_vs_MS.Trt_B   |
| CSNK1A1   | 0.9493   | -0.2714 | 0.796 | 0.79 | 1        | HC_vs_MS.Trt_B   |
| PARG      | 0.95069  | 0.48191 | 0.104 | 0.11 | 1        | HC_vs_MS.Trt_B   |
| CTBS      | 0.95382  | -0.6598 | 0.125 | 0.13 | 1        | HC_vs_MS.Trt_B   |
| WDR48     | 0.95399  | -0.2643 | 0.129 | 0.13 | 1        | HC_vs_MS.Trt_B   |
| DCAF1     | 0.95415  | -0.2876 | 0.172 | 0.17 | 1        | HC_vs_MS.Trt_B   |
| SPHK1     | 0.95464  | 0.33137 | 0.138 | 0.14 | 1        | HC_vs_MS.Trt_B   |
| GID8      | 0.95529  | -0.4045 | 0.116 | 0.11 | 1        | HC_vs_MS.Trt_B   |
| CALM1     | 0.95657  | -0.2662 | 0.816 | 0.73 | 1        | HC_vs_MS.Trt_B   |
| SULT1A4   | 0.95693  | -0.4538 | 0.21  | 0.21 | 1        | HC_vs_MS.Trt_B   |
| CNKSR1    | 0.95804  | 0.68801 | 0.138 | 0.14 | 1        | HC_vs_MS.Trt_B   |
| NAXE      | 0.959    | -0.2504 | 0.107 | 0.11 | 1        | HC_vs_MS.Trt_B   |
| CEP70     | 0.9601   | -0.9363 | 0.123 | 0.13 | 1        | HC_vs_MS.Trt_B   |
| CRIP1     | 0.96586  | -0.7464 | 0.296 | 0.28 | 1        | HC_vs_MS.Trt_B   |
| IDI1      | 0.9661   | -0.2543 | 0.116 | 0.12 | 1        | HC_vs_MS.Trt_B   |
| EBP       | 0.96704  | -0.3806 | 0.129 | 0.13 | 1        | HC_vs_MS.Trt_B   |
| NDUFA6    | 0.97005  | -0.4228 | 0.188 | 0.19 | 1        | HC_vs_MS.Trt_B   |
| GOLGA7    | 0.97167  | -0.4891 | 0.216 | 0.22 | 1        | HC_vs_MS.Trt_B   |
| NDUFS6    | 0.974    | -0.6071 | 0.107 | 0.11 | 1        | HC_vs_MS.Trt_B   |
| ATP6V1F   | 0.97441  | -0.4607 | 0.155 | 0.15 | 1        | HC_vs_MS.Trt_B   |
| VPS29     | 0.97461  | -0.59   | 0.414 | 0.41 | 1        | HC_vs_MS.Trt_B   |
| MRPL33    | 0.97464  | -0.5595 | 0.11  | 0.11 | 1        | HC_vs_MS.Trt_B   |
| KIAA0408  | 0.97496  | -0.4025 | 0.27  | 0.28 | 1        | HC_vs_MS.Trt_B   |
| STK17B    | 0.97537  | -0.4578 | 0.933 | 0.87 | 1        | HC_vs_MS.Trt_B   |
| SNRNP     | 0.97563  | -0.4332 | 0.188 | 0.19 | 1        | HC_vs_MS.Trt_B   |
| C12orf29  | 0.97738  | -0.4214 | 0.199 | 0.19 | 1        | HC_vs_MS.Trt_B   |
| CDV3      | 0.97756  | -0.3511 | 0.188 | 0.19 | 1        | HC_vs_MS.Trt_B   |
| TBP       | 0.97798  | -0.2551 | 0.314 | 0.31 | 1        | HC_vs_MS.Trt_B   |
| EMP3      | 0.97923  | -0.293  | 0.507 | 0.46 | 1        | HC_vs_MS.Trt_B   |
| LTV1      | 0.98116  | -0.2648 | 0.101 | 0.1  | 1        | HC_vs_MS.Trt_B   |
| PPP3CA    | 0.98156  | -0.5552 | 0.425 | 0.42 | 1        | HC_vs_MS.Trt_B   |
| SNRNP40   | 0.9822   | -0.2518 | 0.135 | 0.14 | 1        | HC_vs_MS.Trt_B   |
| SF3B4     | 0.98886  | -0.3274 | 0.172 | 0.17 | 1        | HC_vs_MS.Trt_B   |
| BOP1      | 0.99337  | 0.52599 | 0.186 | 0.19 | 1        | HC_vs_MS.Trt_B   |
| SOD1      | 0.9937   | -0.3507 | 0.646 | 0.64 | 1        | HC_vs_MS.Trt_B   |
| CCDC82    | 0.99403  | -0.4972 | 0.129 | 0.13 | 1        | HC_vs_MS.Trt_B   |
| CHURC1-FN | 0.99573  | -0.4869 | 0.165 | 0.16 | 1        | HC_vs_MS.Trt_B   |
| PCSK5     | 2.08E-32 | 2.61124 | 0.994 | 0.93 | 3.32E-28 | HC_vs_MS.NoTrt_F |
| MT-ND4L   | 1.15E-22 | 1.29296 | 0.974 | 1    | 1.84E-18 | HC_vs_MS.NoTrt_F |

|          |          |         |       |      |          |                  |
|----------|----------|---------|-------|------|----------|------------------|
| ORC6     | 4.44E-21 | 1.1084  | 0.994 | 0.97 | 7.09E-17 | HC_vs_MS.NoTrt_F |
| METTL21A | 2.74E-17 | 1.0664  | 0.977 | 0.95 | 4.38E-13 | HC_vs_MS.NoTrt_F |
| MORC4    | 3.02E-16 | 0.60796 | 1     | 0.99 | 4.83E-12 | HC_vs_MS.NoTrt_F |
| RBPJ     | 2.20E-15 | -0.3025 | 0.408 | 0.79 | 3.52E-11 | HC_vs_MS.NoTrt_F |
| RAD21    | 4.64E-12 | -0.9097 | 0.277 | 0.57 | 7.41E-08 | HC_vs_MS.NoTrt_F |
| HS3ST3B1 | 6.41E-12 | -0.7353 | 0.46  | 0.71 | 1.02E-07 | HC_vs_MS.NoTrt_F |
| TYR      | 2.09E-11 | -0.6736 | 0.205 | 0.46 | 3.34E-07 | HC_vs_MS.NoTrt_F |
| C2CD3    | 5.02E-11 | 0.37303 | 1     | 0.99 | 8.02E-07 | HC_vs_MS.NoTrt_F |
| ARHGEF18 | 5.46E-11 | -0.3426 | 0.266 | 0.55 | 8.72E-07 | HC_vs_MS.NoTrt_F |
| TMEM45A  | 1.90E-10 | 0.51473 | 1     | 0.99 | 3.04E-06 | HC_vs_MS.NoTrt_F |
| RPS3A    | 2.75E-10 | -0.3521 | 0.882 | 0.99 | 4.39E-06 | HC_vs_MS.NoTrt_F |
| ARHGAP45 | 6.40E-10 | -0.5341 | 0.61  | 0.87 | 1.02E-05 | HC_vs_MS.NoTrt_F |
| MED15    | 7.14E-10 | -0.5498 | 0.54  | 0.76 | 1.14E-05 | HC_vs_MS.NoTrt_F |
| ITGB1    | 2.01E-09 | -0.5623 | 0.592 | 0.82 | 3.22E-05 | HC_vs_MS.NoTrt_F |
| RASA3    | 2.15E-09 | -0.5405 | 0.442 | 0.72 | 3.44E-05 | HC_vs_MS.NoTrt_F |
| RAD54L2  | 2.35E-09 | -0.7775 | 0.642 | 0.81 | 3.76E-05 | HC_vs_MS.NoTrt_F |
| EPB41    | 2.84E-09 | -0.4896 | 0.335 | 0.62 | 4.54E-05 | HC_vs_MS.NoTrt_F |
| ABCC9    | 2.99E-09 | 0.64826 | 0.98  | 0.96 | 4.78E-05 | HC_vs_MS.NoTrt_F |
| SLFN5    | 3.58E-09 | -0.9851 | 0.855 | 0.93 | 5.71E-05 | HC_vs_MS.NoTrt_F |
| AQP3     | 7.33E-09 | -0.6231 | 0.332 | 0.6  | 1.17E-04 | HC_vs_MS.NoTrt_F |
| BTN3A2   | 8.65E-09 | -0.6117 | 0.76  | 0.85 | 1.38E-04 | HC_vs_MS.NoTrt_F |
| PAN3     | 9.50E-09 | -0.3629 | 0.824 | 0.95 | 1.52E-04 | HC_vs_MS.NoTrt_F |
| SULT1B1  | 1.20E-08 | 0.65073 | 0.988 | 0.96 | 1.92E-04 | HC_vs_MS.NoTrt_F |
| LCP1     | 1.65E-08 | -0.4662 | 0.621 | 0.85 | 2.64E-04 | HC_vs_MS.NoTrt_F |
| ACTR2    | 1.71E-08 | -0.6056 | 0.413 | 0.66 | 2.73E-04 | HC_vs_MS.NoTrt_F |
| UBE2D2   | 1.73E-08 | -0.6844 | 0.41  | 0.65 | 2.76E-04 | HC_vs_MS.NoTrt_F |
| RPL26    | 1.88E-08 | -0.5077 | 0.899 | 0.97 | 3.00E-04 | HC_vs_MS.NoTrt_F |
| RPS4Y1   | 2.08E-08 | -1.4389 | 0.136 | 0.33 | 3.32E-04 | HC_vs_MS.NoTrt_F |
| FAM110A  | 2.12E-08 | -0.4391 | 0.197 | 0.43 | 3.39E-04 | HC_vs_MS.NoTrt_F |
| RPS6     | 2.28E-08 | -0.3221 | 0.919 | 1    | 3.64E-04 | HC_vs_MS.NoTrt_F |
| NABP1    | 2.55E-08 | -0.5089 | 0.766 | 0.88 | 4.07E-04 | HC_vs_MS.NoTrt_F |
| HNRNPA0  | 2.90E-08 | -0.5292 | 0.338 | 0.59 | 4.63E-04 | HC_vs_MS.NoTrt_F |
| PIK3IP1  | 3.40E-08 | -0.2572 | 0.581 | 0.82 | 5.43E-04 | HC_vs_MS.NoTrt_F |
| CSDE1    | 6.24E-08 | -0.5824 | 0.434 | 0.67 | 9.96E-04 | HC_vs_MS.NoTrt_F |
| LSM6     | 6.48E-08 | -0.2843 | 0.162 | 0.38 | 0.001036 | HC_vs_MS.NoTrt_F |
| RNF6     | 6.54E-08 | -1.5414 | 0.162 | 0.35 | 0.001045 | HC_vs_MS.NoTrt_F |
| C1D      | 7.61E-08 | -0.387  | 0.139 | 0.34 | 0.001216 | HC_vs_MS.NoTrt_F |
| GPSM3    | 8.08E-08 | -0.5089 | 0.451 | 0.67 | 0.00129  | HC_vs_MS.NoTrt_F |
| NRBF2    | 9.63E-08 | -0.6026 | 0.139 | 0.33 | 0.001537 | HC_vs_MS.NoTrt_F |
| ASF1A    | 1.01E-07 | -0.4176 | 0.156 | 0.35 | 0.001617 | HC_vs_MS.NoTrt_F |

|          |          |         |       |      |          |                  |
|----------|----------|---------|-------|------|----------|------------------|
| MT-CO2   | 1.03E-07 | 0.59896 | 0.983 | 1    | 0.001647 | HC_vs_MS.NoTrt_F |
| LDHB     | 1.07E-07 | -0.3571 | 0.595 | 0.85 | 0.00171  | HC_vs_MS.NoTrt_F |
| LBH      | 1.08E-07 | -0.4693 | 0.61  | 0.82 | 0.001723 | HC_vs_MS.NoTrt_F |
| CPA5     | 1.27E-07 | -1.6281 | 0.017 | 0.13 | 0.002023 | HC_vs_MS.NoTrt_F |
| PRRG3    | 1.34E-07 | 1.51696 | 0.737 | 0.55 | 0.002148 | HC_vs_MS.NoTrt_F |
| GNPAT    | 1.35E-07 | -0.9723 | 0.168 | 0.37 | 0.002154 | HC_vs_MS.NoTrt_F |
| RIMS2    | 1.44E-07 | 0.58483 | 0.957 | 0.92 | 0.002298 | HC_vs_MS.NoTrt_F |
| HOXB2    | 1.56E-07 | -0.3358 | 0.182 | 0.39 | 0.002497 | HC_vs_MS.NoTrt_F |
| RBX1     | 1.60E-07 | -0.4543 | 0.309 | 0.54 | 0.002548 | HC_vs_MS.NoTrt_F |
| MOB2     | 1.68E-07 | -1.2395 | 0.101 | 0.27 | 0.00268  | HC_vs_MS.NoTrt_F |
| C4orf36  | 1.72E-07 | 0.56595 | 0.908 | 0.86 | 0.002744 | HC_vs_MS.NoTrt_F |
| RAB5A    | 1.72E-07 | -0.6207 | 0.176 | 0.38 | 0.002747 | HC_vs_MS.NoTrt_F |
| HNRNPF   | 1.75E-07 | -0.6694 | 0.335 | 0.55 | 0.002788 | HC_vs_MS.NoTrt_F |
| INTU     | 1.77E-07 | 0.30378 | 0.991 | 0.99 | 0.002823 | HC_vs_MS.NoTrt_F |
| KIAA1551 | 1.79E-07 | -0.4495 | 0.48  | 0.71 | 0.002853 | HC_vs_MS.NoTrt_F |
| C12orf45 | 1.84E-07 | 0.35972 | 1     | 1    | 0.002932 | HC_vs_MS.NoTrt_F |
| MRPL18   | 1.85E-07 | -0.8618 | 0.145 | 0.33 | 0.002962 | HC_vs_MS.NoTrt_F |
| SOD2     | 1.90E-07 | 0.4163  | 1     | 1    | 0.003035 | HC_vs_MS.NoTrt_F |
| TMED7    | 1.98E-07 | -1.7154 | 0.098 | 0.27 | 0.003163 | HC_vs_MS.NoTrt_F |
| PTEN     | 2.38E-07 | -0.4888 | 0.468 | 0.66 | 0.003807 | HC_vs_MS.NoTrt_F |
| AES      | 2.57E-07 | -0.4076 | 0.5   | 0.74 | 0.004104 | HC_vs_MS.NoTrt_F |
| LIMD2    | 2.72E-07 | -0.3917 | 0.581 | 0.82 | 0.004352 | HC_vs_MS.NoTrt_F |
| TBC1D14  | 2.88E-07 | -0.6113 | 0.185 | 0.39 | 0.004601 | HC_vs_MS.NoTrt_F |
| COL8A1   | 2.97E-07 | 0.65658 | 0.916 | 0.81 | 0.00475  | HC_vs_MS.NoTrt_F |
| DAXX     | 2.99E-07 | -0.7164 | 0.173 | 0.37 | 0.004783 | HC_vs_MS.NoTrt_F |
| BIN2     | 3.00E-07 | -0.6126 | 0.543 | 0.71 | 0.004795 | HC_vs_MS.NoTrt_F |
| EEF2     | 3.08E-07 | -0.4088 | 0.806 | 0.94 | 0.004916 | HC_vs_MS.NoTrt_F |
| ELF1     | 3.94E-07 | -0.5336 | 0.355 | 0.59 | 0.006292 | HC_vs_MS.NoTrt_F |
| TRMT13   | 4.10E-07 | -0.769  | 0.118 | 0.29 | 0.006544 | HC_vs_MS.NoTrt_F |
| TRMT112  | 4.58E-07 | -0.4567 | 0.272 | 0.49 | 0.007308 | HC_vs_MS.NoTrt_F |
| TCEAL8   | 4.75E-07 | -0.9028 | 0.116 | 0.29 | 0.007582 | HC_vs_MS.NoTrt_F |
| NME2     | 4.91E-07 | -0.5071 | 0.486 | 0.69 | 0.007848 | HC_vs_MS.NoTrt_F |
| A2M      | 4.94E-07 | 1.47593 | 0.399 | 0.19 | 0.007894 | HC_vs_MS.NoTrt_F |
| MAT2B    | 4.97E-07 | -0.5909 | 0.746 | 0.88 | 0.007947 | HC_vs_MS.NoTrt_F |
| CACYBP   | 5.25E-07 | -0.4977 | 0.246 | 0.46 | 0.008394 | HC_vs_MS.NoTrt_F |
| ANXA2    | 5.26E-07 | -0.4174 | 0.743 | 0.86 | 0.008398 | HC_vs_MS.NoTrt_F |
| ANXA11   | 5.87E-07 | -0.5191 | 0.838 | 0.91 | 0.009375 | HC_vs_MS.NoTrt_F |
| ZNF408   | 6.02E-07 | -1.6608 | 0.026 | 0.14 | 0.009614 | HC_vs_MS.NoTrt_F |
| EIF4A2   | 6.53E-07 | -0.3829 | 0.621 | 0.83 | 0.010432 | HC_vs_MS.NoTrt_F |
| NEK5     | 6.68E-07 | 0.50679 | 0.902 | 0.86 | 0.010674 | HC_vs_MS.NoTrt_F |

|            |          |         |       |      |          |                  |
|------------|----------|---------|-------|------|----------|------------------|
| CCDC14     | 6.71E-07 | -0.3148 | 0.228 | 0.45 | 0.010723 | HC_vs_MS.NoTrt_F |
| APOL2      | 7.34E-07 | -0.4549 | 0.523 | 0.71 | 0.011731 | HC_vs_MS.NoTrt_F |
| MCM7       | 7.87E-07 | -0.8088 | 0.153 | 0.33 | 0.012563 | HC_vs_MS.NoTrt_F |
| EMC4       | 7.87E-07 | 0.6273  | 0.997 | 0.99 | 0.012567 | HC_vs_MS.NoTrt_F |
| ANKRD13C   | 8.09E-07 | -0.4346 | 0.145 | 0.33 | 0.012929 | HC_vs_MS.NoTrt_F |
| JAKMIP1    | 8.21E-07 | -0.4028 | 0.24  | 0.45 | 0.013119 | HC_vs_MS.NoTrt_F |
| LIMK2      | 8.29E-07 | -0.6358 | 0.182 | 0.38 | 0.013236 | HC_vs_MS.NoTrt_F |
| UPK3BL     | 9.09E-07 | -0.4073 | 0.532 | 0.73 | 0.014513 | HC_vs_MS.NoTrt_F |
| FAM160B1   | 9.13E-07 | -0.6679 | 0.205 | 0.4  | 0.014579 | HC_vs_MS.NoTrt_F |
| UBL7       | 9.50E-07 | -0.7479 | 0.145 | 0.32 | 0.015167 | HC_vs_MS.NoTrt_F |
| GCNT4      | 9.52E-07 | -0.436  | 0.344 | 0.57 | 0.015201 | HC_vs_MS.NoTrt_F |
| FABP4      | 1.02E-06 | 1.25275 | 0.39  | 0.2  | 0.016304 | HC_vs_MS.NoTrt_F |
| CTB-133G6. | 1.03E-06 | -0.7428 | 0.194 | 0.39 | 0.016521 | HC_vs_MS.NoTrt_F |
| KRT10      | 1.04E-06 | -0.6662 | 0.113 | 0.28 | 0.016593 | HC_vs_MS.NoTrt_F |
| THYN1      | 1.11E-06 | -0.532  | 0.156 | 0.34 | 0.017723 | HC_vs_MS.NoTrt_F |
| ASXL1      | 1.11E-06 | -0.4696 | 0.214 | 0.41 | 0.017751 | HC_vs_MS.NoTrt_F |
| DACT3      | 1.19E-06 | 0.43024 | 0.983 | 0.95 | 0.01901  | HC_vs_MS.NoTrt_F |
| DYNLL1     | 1.20E-06 | -0.5301 | 0.393 | 0.58 | 0.019178 | HC_vs_MS.NoTrt_F |
| WTAP       | 1.20E-06 | -0.4041 | 0.621 | 0.81 | 0.019189 | HC_vs_MS.NoTrt_F |
| SPTBN5     | 1.23E-06 | -1.0813 | 0.02  | 0.12 | 0.01967  | HC_vs_MS.NoTrt_F |
| 6-Mar      | 1.26E-06 | -0.3981 | 0.827 | 0.9  | 0.020173 | HC_vs_MS.NoTrt_F |
| MRPL34     | 1.31E-06 | -0.7576 | 0.329 | 0.51 | 0.02099  | HC_vs_MS.NoTrt_F |
| NARS       | 1.37E-06 | -1.0132 | 0.176 | 0.35 | 0.021929 | HC_vs_MS.NoTrt_F |
| KDM8       | 1.38E-06 | -1.6443 | 0.052 | 0.18 | 0.022095 | HC_vs_MS.NoTrt_F |
| PDE9A      | 1.45E-06 | -2.0845 | 0.043 | 0.17 | 0.023163 | HC_vs_MS.NoTrt_F |
| SPIN2B     | 1.46E-06 | -0.7754 | 0.046 | 0.17 | 0.023357 | HC_vs_MS.NoTrt_F |
| EBP        | 1.47E-06 | -0.5393 | 0.234 | 0.43 | 0.023455 | HC_vs_MS.NoTrt_F |
| IKBKE      | 1.49E-06 | -0.4371 | 0.309 | 0.53 | 0.023734 | HC_vs_MS.NoTrt_F |
| ALKBH5     | 1.53E-06 | -0.5543 | 0.208 | 0.4  | 0.024506 | HC_vs_MS.NoTrt_F |
| SAMD12     | 1.54E-06 | 0.51898 | 0.994 | 0.98 | 0.024677 | HC_vs_MS.NoTrt_F |
| TNFAIP8L2  | 1.60E-06 | -1.0561 | 0.098 | 0.25 | 0.025503 | HC_vs_MS.NoTrt_F |
| YJEFN3     | 1.60E-06 | -1.3896 | 0.052 | 0.18 | 0.025543 | HC_vs_MS.NoTrt_F |
| CLDND1     | 1.73E-06 | -0.4249 | 0.379 | 0.6  | 0.027644 | HC_vs_MS.NoTrt_F |
| HSPA1A     | 1.75E-06 | -0.295  | 0.263 | 0.47 | 0.027981 | HC_vs_MS.NoTrt_F |
| XXcos-LUCA | 1.80E-06 | -0.2551 | 0.029 | 0.14 | 0.02874  | HC_vs_MS.NoTrt_F |
| LTB        | 1.80E-06 | -0.3207 | 0.584 | 0.81 | 0.028803 | HC_vs_MS.NoTrt_F |
| PWWP2A     | 1.82E-06 | -0.6204 | 0.139 | 0.31 | 0.028996 | HC_vs_MS.NoTrt_F |
| IRF2       | 1.82E-06 | -0.5869 | 0.338 | 0.53 | 0.029014 | HC_vs_MS.NoTrt_F |
| ANK3       | 1.84E-06 | 0.63292 | 0.942 | 0.89 | 0.029409 | HC_vs_MS.NoTrt_F |
| TBC1D23    | 1.89E-06 | -0.8319 | 0.15  | 0.33 | 0.030114 | HC_vs_MS.NoTrt_F |

|          |          |         |       |      |          |                  |
|----------|----------|---------|-------|------|----------|------------------|
| SDF2     | 1.89E-06 | -0.5069 | 0.243 | 0.44 | 0.030235 | HC_vs_MS.NoTrt_F |
| TTC39C   | 1.93E-06 | -0.4305 | 0.824 | 0.9  | 0.030809 | HC_vs_MS.NoTrt_F |
| TRPV2    | 1.97E-06 | -0.4666 | 0.231 | 0.43 | 0.03147  | HC_vs_MS.NoTrt_F |
| PLCL1    | 2.17E-06 | -1.0972 | 0.13  | 0.29 | 0.034644 | HC_vs_MS.NoTrt_F |
| RNF40    | 2.33E-06 | -1.2612 | 0.098 | 0.25 | 0.037285 | HC_vs_MS.NoTrt_F |
| CCR4     | 2.40E-06 | -0.8511 | 0.922 | 0.94 | 0.038348 | HC_vs_MS.NoTrt_F |
| REXO4    | 2.53E-06 | -0.7443 | 0.061 | 0.19 | 0.040478 | HC_vs_MS.NoTrt_F |
| CBLL1    | 3.03E-06 | -0.575  | 0.243 | 0.44 | 0.048422 | HC_vs_MS.NoTrt_F |
| MT-ND2   | 3.18E-06 | 0.73669 | 0.908 | 0.89 | 0.050766 | HC_vs_MS.NoTrt_F |
| MEAF6    | 3.32E-06 | -0.4665 | 0.277 | 0.48 | 0.053009 | HC_vs_MS.NoTrt_F |
| GTF3A    | 3.33E-06 | -0.2698 | 0.373 | 0.61 | 0.053121 | HC_vs_MS.NoTrt_F |
| ACLY     | 3.38E-06 | -0.2779 | 0.211 | 0.4  | 0.053953 | HC_vs_MS.NoTrt_F |
| VAMP8    | 3.48E-06 | -0.3289 | 0.298 | 0.53 | 0.055642 | HC_vs_MS.NoTrt_F |
| SYNPO    | 3.60E-06 | -0.3478 | 0.237 | 0.44 | 0.057479 | HC_vs_MS.NoTrt_F |
| NDUFB8   | 3.68E-06 | -0.3252 | 0.37  | 0.6  | 0.058808 | HC_vs_MS.NoTrt_F |
| LRRC8C   | 3.80E-06 | -0.3104 | 0.335 | 0.54 | 0.060619 | HC_vs_MS.NoTrt_F |
| ARRDC5   | 3.85E-06 | -0.5466 | 0.101 | 0.25 | 0.06149  | HC_vs_MS.NoTrt_F |
| ALG10    | 3.87E-06 | -0.5897 | 0.069 | 0.2  | 0.061783 | HC_vs_MS.NoTrt_F |
| KRTAP3-1 | 3.95E-06 | -0.3405 | 0.075 | 0.22 | 0.063047 | HC_vs_MS.NoTrt_F |
| GIMAP7   | 3.96E-06 | -0.3189 | 0.41  | 0.65 | 0.063332 | HC_vs_MS.NoTrt_F |
| SASS6    | 4.06E-06 | -0.3611 | 0.055 | 0.18 | 0.06483  | HC_vs_MS.NoTrt_F |
| FAM104A  | 4.11E-06 | -0.3888 | 0.191 | 0.37 | 0.065584 | HC_vs_MS.NoTrt_F |
| ARRDC3   | 4.16E-06 | -0.3335 | 0.454 | 0.69 | 0.066438 | HC_vs_MS.NoTrt_F |
| EGLN2    | 4.27E-06 | -0.3789 | 0.251 | 0.44 | 0.068173 | HC_vs_MS.NoTrt_F |
| ADA      | 4.44E-06 | -0.7993 | 0.107 | 0.26 | 0.070914 | HC_vs_MS.NoTrt_F |
| RACGAP1  | 4.45E-06 | -0.6803 | 0.066 | 0.2  | 0.071002 | HC_vs_MS.NoTrt_F |
| SHISA9   | 4.54E-06 | 0.34247 | 0.971 | 0.92 | 0.072454 | HC_vs_MS.NoTrt_F |
| KYNU     | 4.54E-06 | 0.4417  | 0.983 | 0.99 | 0.072568 | HC_vs_MS.NoTrt_F |
| CDPF1    | 4.62E-06 | -0.6029 | 0.058 | 0.18 | 0.073829 | HC_vs_MS.NoTrt_F |
| MSANTD4  | 4.65E-06 | -0.499  | 0.064 | 0.19 | 0.074221 | HC_vs_MS.NoTrt_F |
| STAT1    | 4.70E-06 | -0.583  | 0.384 | 0.58 | 0.075127 | HC_vs_MS.NoTrt_F |
| OCIAD2   | 4.72E-06 | -0.3778 | 0.662 | 0.82 | 0.075327 | HC_vs_MS.NoTrt_F |
| DDX28    | 4.91E-06 | -1.1938 | 0.061 | 0.19 | 0.078417 | HC_vs_MS.NoTrt_F |
| FRK      | 5.17E-06 | 0.40249 | 0.997 | 1    | 0.082508 | HC_vs_MS.NoTrt_F |
| REST     | 5.24E-06 | -0.3306 | 0.188 | 0.37 | 0.08366  | HC_vs_MS.NoTrt_F |
| ZBTB45   | 5.28E-06 | -0.4933 | 0.035 | 0.14 | 0.084396 | HC_vs_MS.NoTrt_F |
| MUS81    | 5.40E-06 | -0.5488 | 0.159 | 0.33 | 0.086262 | HC_vs_MS.NoTrt_F |
| TXNIP    | 5.98E-06 | -0.3841 | 0.639 | 0.8  | 0.095471 | HC_vs_MS.NoTrt_F |
| ATAD3A   | 6.07E-06 | -0.6255 | 0.061 | 0.19 | 0.096879 | HC_vs_MS.NoTrt_F |
| HSPA1B   | 6.10E-06 | -0.9144 | 0.329 | 0.49 | 0.097406 | HC_vs_MS.NoTrt_F |



|            |          |         |       |      |          |                  |
|------------|----------|---------|-------|------|----------|------------------|
| LGALS3     | 6.27E-06 | -0.4469 | 0.647 | 0.77 | 0.100186 | HC_vs_MS.NoTrt_F |
| TTC32      | 6.83E-06 | -0.6055 | 0.098 | 0.24 | 0.109142 | HC_vs_MS.NoTrt_F |
| RP11-343C2 | 7.28E-06 | -0.4607 | 0.168 | 0.34 | 0.116231 | HC_vs_MS.NoTrt_F |
| TSGA10     | 7.34E-06 | -0.7747 | 0.072 | 0.2  | 0.117256 | HC_vs_MS.NoTrt_F |
| ACAD11     | 7.45E-06 | -1.4462 | 0.182 | 0.35 | 0.118942 | HC_vs_MS.NoTrt_F |
| TRMU       | 7.47E-06 | -0.7861 | 0.199 | 0.38 | 0.119309 | HC_vs_MS.NoTrt_F |
| TTC1       | 7.51E-06 | -0.5618 | 0.199 | 0.37 | 0.119923 | HC_vs_MS.NoTrt_F |
| NUDT2      | 7.55E-06 | -0.7298 | 0.055 | 0.18 | 0.120551 | HC_vs_MS.NoTrt_F |
| CYSLTR1    | 7.60E-06 | 0.57537 | 0.98  | 0.96 | 0.121371 | HC_vs_MS.NoTrt_F |
| CDRT1      | 7.69E-06 | -2.0846 | 0.02  | 0.11 | 0.122764 | HC_vs_MS.NoTrt_F |
| PUM2       | 8.08E-06 | -0.51   | 0.338 | 0.53 | 0.128997 | HC_vs_MS.NoTrt_F |
| TMBIM6     | 8.12E-06 | -0.3825 | 0.832 | 0.91 | 0.12972  | HC_vs_MS.NoTrt_F |
| RNF168     | 8.24E-06 | -0.3904 | 0.592 | 0.74 | 0.131644 | HC_vs_MS.NoTrt_F |
| MAPK7      | 8.25E-06 | -1.1955 | 0.046 | 0.16 | 0.131705 | HC_vs_MS.NoTrt_F |
| SUCLG2     | 8.28E-06 | -0.5066 | 0.199 | 0.38 | 0.13226  | HC_vs_MS.NoTrt_F |
| SLC35D2    | 8.31E-06 | -1.2036 | 0.064 | 0.19 | 0.132694 | HC_vs_MS.NoTrt_F |
| PLGRKT     | 8.31E-06 | -0.7922 | 0.101 | 0.24 | 0.132791 | HC_vs_MS.NoTrt_F |
| RELL2      | 8.47E-06 | -0.7186 | 0.104 | 0.25 | 0.135287 | HC_vs_MS.NoTrt_F |
| MT-ND4     | 8.58E-06 | 0.45226 | 0.991 | 1    | 0.137127 | HC_vs_MS.NoTrt_F |
| CFAP54     | 8.63E-06 | 0.52647 | 0.965 | 0.97 | 0.137776 | HC_vs_MS.NoTrt_F |
| SLC25A22   | 8.69E-06 | -0.7032 | 0.066 | 0.19 | 0.138839 | HC_vs_MS.NoTrt_F |
| KCNA3      | 8.71E-06 | -0.607  | 0.234 | 0.41 | 0.139148 | HC_vs_MS.NoTrt_F |
| RAB11B     | 8.73E-06 | -0.4381 | 0.419 | 0.62 | 0.139464 | HC_vs_MS.NoTrt_F |
| WDPCP      | 8.88E-06 | 0.40949 | 0.988 | 0.96 | 0.141853 | HC_vs_MS.NoTrt_F |
| ARL5B      | 8.98E-06 | 0.48491 | 0.153 | 0.33 | 0.143439 | HC_vs_MS.NoTrt_F |
| C11orf98   | 9.58E-06 | -0.5905 | 0.165 | 0.33 | 0.153013 | HC_vs_MS.NoTrt_F |
| EFCAB7     | 9.60E-06 | -1.6361 | 0.038 | 0.14 | 0.153397 | HC_vs_MS.NoTrt_F |
| HEBP2      | 9.66E-06 | -0.5849 | 0.35  | 0.53 | 0.154247 | HC_vs_MS.NoTrt_F |
| C5orf15    | 9.77E-06 | -0.6889 | 0.156 | 0.32 | 0.156112 | HC_vs_MS.NoTrt_F |
| NDUFA6     | 1.02E-05 | -0.4511 | 0.257 | 0.45 | 0.162238 | HC_vs_MS.NoTrt_F |
| METTL18    | 1.02E-05 | -0.9673 | 0.061 | 0.18 | 0.163178 | HC_vs_MS.NoTrt_F |
| UBAC1      | 1.02E-05 | -0.5836 | 0.04  | 0.15 | 0.163189 | HC_vs_MS.NoTrt_F |
| UNC119     | 1.07E-05 | -0.5559 | 0.101 | 0.24 | 0.170959 | HC_vs_MS.NoTrt_F |
| FUT7       | 1.07E-05 | -0.481  | 0.107 | 0.25 | 0.171257 | HC_vs_MS.NoTrt_F |
| SUV39H1    | 1.08E-05 | -0.4472 | 0.04  | 0.15 | 0.172217 | HC_vs_MS.NoTrt_F |
| TCEA1      | 1.08E-05 | -0.4965 | 0.341 | 0.54 | 0.172781 | HC_vs_MS.NoTrt_F |
| UGGT2      | 1.10E-05 | 0.57105 | 0.908 | 0.88 | 0.17499  | HC_vs_MS.NoTrt_F |
| CEP164     | 1.11E-05 | -0.2657 | 0.208 | 0.38 | 0.177451 | HC_vs_MS.NoTrt_F |
| CSGALNACT  | 1.12E-05 | -0.6275 | 0.538 | 0.69 | 0.179547 | HC_vs_MS.NoTrt_F |
| PI4K2B     | 1.13E-05 | -0.5268 | 0.032 | 0.13 | 0.179912 | HC_vs_MS.NoTrt_F |

|           |          |         |       |      |          |                  |
|-----------|----------|---------|-------|------|----------|------------------|
| ANXA2R    | 1.14E-05 | -0.4757 | 0.182 | 0.35 | 0.182735 | HC_vs_MS.NoTrt_F |
| NOP9      | 1.21E-05 | -1.2464 | 0.038 | 0.14 | 0.192481 | HC_vs_MS.NoTrt_F |
| BAZ1B     | 1.21E-05 | -0.5481 | 0.197 | 0.37 | 0.192864 | HC_vs_MS.NoTrt_F |
| HSPE1-MOB | 1.21E-05 | -1.0711 | 0.101 | 0.24 | 0.193681 | HC_vs_MS.NoTrt_F |
| ZNF706    | 1.22E-05 | -0.4244 | 0.373 | 0.57 | 0.194701 | HC_vs_MS.NoTrt_F |
| MT-ND5    | 1.23E-05 | 0.61895 | 0.899 | 0.88 | 0.195706 | HC_vs_MS.NoTrt_F |
| SRP54     | 1.25E-05 | -0.3772 | 0.251 | 0.43 | 0.199403 | HC_vs_MS.NoTrt_F |
| SLC9A9    | 1.25E-05 | -0.398  | 0.171 | 0.34 | 0.199741 | HC_vs_MS.NoTrt_F |
| ICAM3     | 1.26E-05 | -0.294  | 0.419 | 0.65 | 0.201596 | HC_vs_MS.NoTrt_F |
| APTX      | 1.26E-05 | -0.5178 | 0.173 | 0.34 | 0.201663 | HC_vs_MS.NoTrt_F |
| SAFB      | 1.27E-05 | -0.5149 | 0.379 | 0.55 | 0.202871 | HC_vs_MS.NoTrt_F |
| GBP5      | 1.27E-05 | -0.4749 | 0.691 | 0.81 | 0.203108 | HC_vs_MS.NoTrt_F |
| AMMECR1L  | 1.31E-05 | -0.624  | 0.251 | 0.44 | 0.209736 | HC_vs_MS.NoTrt_F |
| CCDC167   | 1.32E-05 | -0.3152 | 0.173 | 0.34 | 0.210083 | HC_vs_MS.NoTrt_F |
| IL10RA    | 1.41E-05 | -0.4756 | 0.578 | 0.74 | 0.225972 | HC_vs_MS.NoTrt_F |
| INTS9     | 1.43E-05 | -0.7533 | 0.13  | 0.28 | 0.228662 | HC_vs_MS.NoTrt_F |
| UFSP2     | 1.44E-05 | -0.9797 | 0.116 | 0.26 | 0.230403 | HC_vs_MS.NoTrt_F |
| C12orf4   | 1.45E-05 | -0.5147 | 0.491 | 0.72 | 0.231057 | HC_vs_MS.NoTrt_F |
| LPAR6     | 1.47E-05 | -0.6412 | 0.416 | 0.59 | 0.234771 | HC_vs_MS.NoTrt_F |
| IL6R      | 1.47E-05 | -0.5982 | 0.682 | 0.79 | 0.23546  | HC_vs_MS.NoTrt_F |
| TMEM42    | 1.51E-05 | -0.4117 | 0.133 | 0.28 | 0.241279 | HC_vs_MS.NoTrt_F |
| TAF1C     | 1.53E-05 | -0.6029 | 0.118 | 0.27 | 0.243843 | HC_vs_MS.NoTrt_F |
| FAM153A   | 1.55E-05 | -0.3882 | 0.462 | 0.65 | 0.247074 | HC_vs_MS.NoTrt_F |
| ACTR1B    | 1.56E-05 | -0.4975 | 0.188 | 0.36 | 0.249166 | HC_vs_MS.NoTrt_F |
| NEDD4     | 1.59E-05 | 0.51139 | 0.983 | 0.99 | 0.254673 | HC_vs_MS.NoTrt_F |
| C17orf80  | 1.61E-05 | -1.1524 | 0.052 | 0.17 | 0.256468 | HC_vs_MS.NoTrt_F |
| RASGRP1   | 1.62E-05 | -0.4424 | 0.384 | 0.6  | 0.258061 | HC_vs_MS.NoTrt_F |
| RPAP2     | 1.63E-05 | 0.3168  | 0.997 | 1    | 0.261016 | HC_vs_MS.NoTrt_F |
| RTCB      | 1.66E-05 | -0.4686 | 0.147 | 0.3  | 0.26586  | HC_vs_MS.NoTrt_F |
| JTB       | 1.67E-05 | -0.431  | 0.26  | 0.45 | 0.266214 | HC_vs_MS.NoTrt_F |
| RPA2      | 1.72E-05 | -0.6561 | 0.217 | 0.39 | 0.27512  | HC_vs_MS.NoTrt_F |
| RECQL     | 1.72E-05 | -1.0729 | 0.171 | 0.33 | 0.275265 | HC_vs_MS.NoTrt_F |
| NUCB1     | 1.83E-05 | -0.577  | 0.283 | 0.47 | 0.292472 | HC_vs_MS.NoTrt_F |
| TRIM35    | 1.84E-05 | -0.2523 | 0.202 | 0.38 | 0.293514 | HC_vs_MS.NoTrt_F |
| UBAP1     | 1.84E-05 | -0.7628 | 0.153 | 0.3  | 0.294004 | HC_vs_MS.NoTrt_F |
| CCDC186   | 1.88E-05 | -0.6556 | 0.587 | 0.71 | 0.300837 | HC_vs_MS.NoTrt_F |
| SVBP      | 1.90E-05 | -0.6061 | 0.121 | 0.27 | 0.303733 | HC_vs_MS.NoTrt_F |
| STARD5    | 1.91E-05 | -0.4013 | 0.116 | 0.25 | 0.304923 | HC_vs_MS.NoTrt_F |
| EIF6      | 1.92E-05 | -0.3092 | 0.168 | 0.33 | 0.307171 | HC_vs_MS.NoTrt_F |
| KRCC1     | 1.92E-05 | -0.4352 | 0.124 | 0.27 | 0.307331 | HC_vs_MS.NoTrt_F |

|             |          |         |       |      |          |                  |
|-------------|----------|---------|-------|------|----------|------------------|
| PPP1R2      | 1.93E-05 | -0.6476 | 0.656 | 0.75 | 0.30877  | HC_vs_MS.NoTrt_F |
| MTFP1       | 1.94E-05 | -0.407  | 0.142 | 0.3  | 0.310603 | HC_vs_MS.NoTrt_F |
| BTN3A1      | 2.00E-05 | -0.5688 | 0.61  | 0.74 | 0.319131 | HC_vs_MS.NoTrt_F |
| RRP12       | 2.00E-05 | 0.53571 | 0.934 | 0.87 | 0.320194 | HC_vs_MS.NoTrt_F |
| DNAJC9      | 2.02E-05 | -0.3625 | 0.133 | 0.28 | 0.32206  | HC_vs_MS.NoTrt_F |
| CD36        | 2.04E-05 | 1.58964 | 0.679 | 0.53 | 0.325069 | HC_vs_MS.NoTrt_F |
| KBTBD3      | 2.16E-05 | -0.7854 | 0.075 | 0.2  | 0.345331 | HC_vs_MS.NoTrt_F |
| ZNF775      | 2.17E-05 | -0.7928 | 0.043 | 0.15 | 0.346127 | HC_vs_MS.NoTrt_F |
| SAYSD1      | 2.18E-05 | -0.7077 | 0.208 | 0.38 | 0.348198 | HC_vs_MS.NoTrt_F |
| LACTB2      | 2.22E-05 | -0.7697 | 0.064 | 0.18 | 0.353986 | HC_vs_MS.NoTrt_F |
| OCM         | 2.23E-05 | -0.6126 | 0.023 | 0.11 | 0.35658  | HC_vs_MS.NoTrt_F |
| RPS3        | 2.27E-05 | -0.2711 | 0.913 | 0.99 | 0.363255 | HC_vs_MS.NoTrt_F |
| POP7        | 2.30E-05 | -1.0723 | 0.081 | 0.2  | 0.368001 | HC_vs_MS.NoTrt_F |
| RPL9        | 2.34E-05 | -0.4283 | 0.884 | 0.95 | 0.37358  | HC_vs_MS.NoTrt_F |
| MRPL23      | 2.34E-05 | -0.3321 | 0.11  | 0.25 | 0.373773 | HC_vs_MS.NoTrt_F |
| METAP1D     | 2.37E-05 | -0.5177 | 0.023 | 0.11 | 0.378108 | HC_vs_MS.NoTrt_F |
| PCYT2       | 2.39E-05 | -1.0196 | 0.035 | 0.13 | 0.381625 | HC_vs_MS.NoTrt_F |
| ZNF585A     | 2.48E-05 | -1.907  | 0.353 | 0.53 | 0.396879 | HC_vs_MS.NoTrt_F |
| MIPOL1      | 2.51E-05 | 0.37756 | 1     | 1    | 0.401215 | HC_vs_MS.NoTrt_F |
| CCNE2       | 2.53E-05 | -0.7736 | 0.026 | 0.12 | 0.403703 | HC_vs_MS.NoTrt_F |
| EPS8L2      | 2.58E-05 | -0.4849 | 0.032 | 0.13 | 0.412786 | HC_vs_MS.NoTrt_F |
| POLR2K      | 2.59E-05 | -0.3394 | 0.153 | 0.31 | 0.413818 | HC_vs_MS.NoTrt_F |
| IFIH1       | 2.60E-05 | -0.3584 | 0.026 | 0.12 | 0.415796 | HC_vs_MS.NoTrt_F |
| RP11-2C24.9 | 2.60E-05 | -0.5514 | 0.13  | 0.28 | 0.415914 | HC_vs_MS.NoTrt_F |
| PAGR1       | 2.74E-05 | -0.4657 | 0.173 | 0.34 | 0.437951 | HC_vs_MS.NoTrt_F |
| TPT1        | 2.77E-05 | -0.2651 | 0.879 | 0.96 | 0.44275  | HC_vs_MS.NoTrt_F |
| UBAP2L      | 2.80E-05 | -0.5784 | 0.269 | 0.45 | 0.447358 | HC_vs_MS.NoTrt_F |
| THAP11      | 2.81E-05 | -0.7697 | 0.101 | 0.23 | 0.44922  | HC_vs_MS.NoTrt_F |
| DNAJB1      | 2.83E-05 | -0.4489 | 0.777 | 0.92 | 0.451941 | HC_vs_MS.NoTrt_F |
| ELF4        | 2.87E-05 | -0.6705 | 0.153 | 0.3  | 0.458721 | HC_vs_MS.NoTrt_F |
| HPCAL4      | 2.87E-05 | -1.4161 | 0.055 | 0.17 | 0.459126 | HC_vs_MS.NoTrt_F |
| ARL6IP1     | 2.94E-05 | -0.4898 | 0.506 | 0.66 | 0.470205 | HC_vs_MS.NoTrt_F |
| ZNF182      | 2.97E-05 | -0.477  | 0.061 | 0.18 | 0.474484 | HC_vs_MS.NoTrt_F |
| VAMP5       | 2.99E-05 | -0.6901 | 0.182 | 0.33 | 0.47839  | HC_vs_MS.NoTrt_F |
| BTN2A1      | 3.00E-05 | -0.4955 | 0.156 | 0.3  | 0.479002 | HC_vs_MS.NoTrt_F |
| MTX2        | 3.01E-05 | -0.2992 | 0.225 | 0.39 | 0.48072  | HC_vs_MS.NoTrt_F |
| GTF3C5      | 3.02E-05 | -0.4328 | 0.35  | 0.52 | 0.48275  | HC_vs_MS.NoTrt_F |
| PYCARD      | 3.06E-05 | -0.3153 | 0.107 | 0.24 | 0.48943  | HC_vs_MS.NoTrt_F |
| SDHA        | 3.12E-05 | -0.4753 | 0.581 | 0.74 | 0.498393 | HC_vs_MS.NoTrt_F |
| ANXA7       | 3.13E-05 | -0.3813 | 0.431 | 0.62 | 0.4997   | HC_vs_MS.NoTrt_F |

|             |          |         |       |      |          |                  |
|-------------|----------|---------|-------|------|----------|------------------|
| OXSR1       | 3.16E-05 | -0.2979 | 0.124 | 0.27 | 0.504559 | HC_vs_MS.NoTrt_F |
| CNKSR3      | 3.19E-05 | 0.34674 | 0.991 | 0.97 | 0.509889 | HC_vs_MS.NoTrt_F |
| GEMIN4      | 3.38E-05 | -0.8141 | 0.075 | 0.19 | 0.539318 | HC_vs_MS.NoTrt_F |
| PDCD10      | 3.48E-05 | -0.3999 | 0.243 | 0.41 | 0.555091 | HC_vs_MS.NoTrt_F |
| ZNF384      | 3.50E-05 | -0.5006 | 0.147 | 0.3  | 0.559129 | HC_vs_MS.NoTrt_F |
| UQCRFS1     | 3.51E-05 | -0.4785 | 0.225 | 0.39 | 0.561043 | HC_vs_MS.NoTrt_F |
| FGF13       | 3.52E-05 | 0.55798 | 0.968 | 0.98 | 0.56297  | HC_vs_MS.NoTrt_F |
| MED31       | 3.56E-05 | -0.5589 | 0.133 | 0.28 | 0.568915 | HC_vs_MS.NoTrt_F |
| VDAC3       | 3.65E-05 | -0.2645 | 0.194 | 0.37 | 0.583046 | HC_vs_MS.NoTrt_F |
| SNX20       | 3.68E-05 | -0.572  | 0.419 | 0.56 | 0.588095 | HC_vs_MS.NoTrt_F |
| GPBP1       | 3.71E-05 | -0.5649 | 0.35  | 0.52 | 0.592037 | HC_vs_MS.NoTrt_F |
| EBAG9       | 3.72E-05 | -0.4347 | 0.104 | 0.24 | 0.594282 | HC_vs_MS.NoTrt_F |
| TMEM206     | 3.81E-05 | -0.7939 | 0.066 | 0.18 | 0.608539 | HC_vs_MS.NoTrt_F |
| C15orf53    | 3.90E-05 | -0.3119 | 0.136 | 0.28 | 0.622886 | HC_vs_MS.NoTrt_F |
| BIRC2       | 3.90E-05 | -0.7013 | 0.202 | 0.36 | 0.623524 | HC_vs_MS.NoTrt_F |
| FANK1       | 3.92E-05 | -0.6884 | 0.211 | 0.35 | 0.626718 | HC_vs_MS.NoTrt_F |
| HNRNPH3     | 3.99E-05 | -0.5338 | 0.251 | 0.43 | 0.637723 | HC_vs_MS.NoTrt_F |
| ZDHHC2      | 3.99E-05 | -1.1698 | 0.116 | 0.25 | 0.637824 | HC_vs_MS.NoTrt_F |
| ZNF862      | 4.00E-05 | -0.8158 | 0.145 | 0.29 | 0.638691 | HC_vs_MS.NoTrt_F |
| CCT8        | 4.07E-05 | -0.2812 | 0.283 | 0.48 | 0.649537 | HC_vs_MS.NoTrt_F |
| MRPL51      | 4.07E-05 | -0.3749 | 0.156 | 0.31 | 0.650205 | HC_vs_MS.NoTrt_F |
| CDKN2C      | 4.12E-05 | -1.2112 | 0.043 | 0.14 | 0.658579 | HC_vs_MS.NoTrt_F |
| ADGRD2      | 4.16E-05 | 0.44229 | 0.87  | 0.8  | 0.665273 | HC_vs_MS.NoTrt_F |
| CRBN        | 4.24E-05 | -0.3081 | 0.486 | 0.65 | 0.67717  | HC_vs_MS.NoTrt_F |
| TMEM79      | 4.24E-05 | -1.0212 | 0.098 | 0.23 | 0.678031 | HC_vs_MS.NoTrt_F |
| HCCS        | 4.25E-05 | -1.1132 | 0.046 | 0.15 | 0.679263 | HC_vs_MS.NoTrt_F |
| ITPA        | 4.27E-05 | -0.5456 | 0.176 | 0.33 | 0.681939 | HC_vs_MS.NoTrt_F |
| PIGF        | 4.38E-05 | -0.9824 | 0.13  | 0.27 | 0.699252 | HC_vs_MS.NoTrt_F |
| HMGN3       | 4.39E-05 | -0.6011 | 0.211 | 0.37 | 0.701811 | HC_vs_MS.NoTrt_F |
| ABLIM3      | 4.50E-05 | 1.85446 | 0.275 | 0.13 | 0.718236 | HC_vs_MS.NoTrt_F |
| FTO         | 4.54E-05 | 0.40905 | 0.994 | 0.99 | 0.725035 | HC_vs_MS.NoTrt_F |
| USP8        | 4.58E-05 | 0.58847 | 1     | 0.99 | 0.731987 | HC_vs_MS.NoTrt_F |
| ARPC4-TTL1  | 4.61E-05 | -0.7262 | 0.118 | 0.25 | 0.737061 | HC_vs_MS.NoTrt_F |
| IL7         | 4.66E-05 | -0.3396 | 0.084 | 0.21 | 0.744283 | HC_vs_MS.NoTrt_F |
| C7orf55-LUC | 4.68E-05 | -0.7045 | 0.072 | 0.19 | 0.74724  | HC_vs_MS.NoTrt_F |
| SH3KBP1     | 4.70E-05 | -0.3447 | 0.497 | 0.67 | 0.751284 | HC_vs_MS.NoTrt_F |
| R3HCC1      | 4.77E-05 | -0.6254 | 0.139 | 0.28 | 0.76249  | HC_vs_MS.NoTrt_F |
| HNRNPK      | 4.80E-05 | -0.3022 | 0.708 | 0.83 | 0.766239 | HC_vs_MS.NoTrt_F |
| ADAM12      | 4.82E-05 | -0.3738 | 0.205 | 0.37 | 0.769315 | HC_vs_MS.NoTrt_F |
| C7orf25     | 5.00E-05 | -1.6034 | 0.023 | 0.11 | 0.79939  | HC_vs_MS.NoTrt_F |

|            |          |         |       |      |          |                  |
|------------|----------|---------|-------|------|----------|------------------|
| DUSP14     | 5.07E-05 | -1.1072 | 0.038 | 0.13 | 0.809715 | HC_vs_MS.NoTrt_F |
| ELK3       | 5.08E-05 | -0.6744 | 0.408 | 0.58 | 0.811163 | HC_vs_MS.NoTrt_F |
| RP5-1022E2 | 5.12E-05 | -0.7108 | 0.113 | 0.24 | 0.817065 | HC_vs_MS.NoTrt_F |
| VCP        | 5.16E-05 | -0.4207 | 0.306 | 0.49 | 0.824361 | HC_vs_MS.NoTrt_F |
| CDK8       | 5.17E-05 | -0.5168 | 0.046 | 0.15 | 0.825133 | HC_vs_MS.NoTrt_F |
| LSS        | 5.17E-05 | -1.4565 | 0.13  | 0.27 | 0.825405 | HC_vs_MS.NoTrt_F |
| ANKLE2     | 5.20E-05 | 0.40155 | 0.994 | 0.99 | 0.830955 | HC_vs_MS.NoTrt_F |
| RARRES3    | 5.22E-05 | -0.382  | 0.289 | 0.48 | 0.834262 | HC_vs_MS.NoTrt_F |
| PRPF6      | 5.27E-05 | -0.6212 | 0.231 | 0.38 | 0.841943 | HC_vs_MS.NoTrt_F |
| TRAPPC2L   | 5.31E-05 | -0.8775 | 0.136 | 0.28 | 0.847755 | HC_vs_MS.NoTrt_F |
| SRSF3      | 5.32E-05 | -0.3474 | 0.902 | 0.92 | 0.849708 | HC_vs_MS.NoTrt_F |
| SUSD3      | 5.34E-05 | -0.4774 | 0.298 | 0.48 | 0.853366 | HC_vs_MS.NoTrt_F |
| VPS72      | 5.36E-05 | -0.4847 | 0.145 | 0.29 | 0.856537 | HC_vs_MS.NoTrt_F |
| DHX32      | 5.41E-05 | -1.5975 | 0.026 | 0.11 | 0.863551 | HC_vs_MS.NoTrt_F |
| CNOT11     | 5.41E-05 | -0.7394 | 0.133 | 0.27 | 0.863683 | HC_vs_MS.NoTrt_F |
| OSER1      | 5.44E-05 | -0.3042 | 0.225 | 0.4  | 0.869135 | HC_vs_MS.NoTrt_F |
| FAM50B     | 5.46E-05 | -0.4647 | 0.04  | 0.14 | 0.872524 | HC_vs_MS.NoTrt_F |
| ARMCX5     | 5.47E-05 | -0.5752 | 0.075 | 0.19 | 0.873325 | HC_vs_MS.NoTrt_F |
| TIFA       | 5.49E-05 | -0.4407 | 0.124 | 0.27 | 0.876879 | HC_vs_MS.NoTrt_F |
| MTA2       | 5.52E-05 | -1.0366 | 0.263 | 0.43 | 0.881771 | HC_vs_MS.NoTrt_F |
| ABRACL     | 5.58E-05 | -0.3545 | 0.257 | 0.45 | 0.890624 | HC_vs_MS.NoTrt_F |
| C4orf3     | 5.62E-05 | -0.7851 | 0.497 | 0.61 | 0.898196 | HC_vs_MS.NoTrt_F |
| ATP13A1    | 5.63E-05 | -0.4019 | 0.283 | 0.44 | 0.899184 | HC_vs_MS.NoTrt_F |
| TBC1D2     | 5.64E-05 | -0.6357 | 0.064 | 0.18 | 0.900509 | HC_vs_MS.NoTrt_F |
| ZNF792     | 5.66E-05 | -0.397  | 0.032 | 0.12 | 0.904323 | HC_vs_MS.NoTrt_F |
| SDHAF3     | 5.77E-05 | -0.689  | 0.072 | 0.19 | 0.92193  | HC_vs_MS.NoTrt_F |
| CDKN1B     | 5.81E-05 | -0.2544 | 0.355 | 0.55 | 0.928681 | HC_vs_MS.NoTrt_F |
| THAP1      | 5.82E-05 | -0.3003 | 0.104 | 0.23 | 0.929592 | HC_vs_MS.NoTrt_F |
| DYNLL2     | 5.83E-05 | -0.6026 | 0.133 | 0.27 | 0.930532 | HC_vs_MS.NoTrt_F |
| CETN2      | 5.85E-05 | -0.7071 | 0.035 | 0.13 | 0.934477 | HC_vs_MS.NoTrt_F |
| ENTPD6     | 5.90E-05 | -0.4905 | 0.15  | 0.29 | 0.943055 | HC_vs_MS.NoTrt_F |
| ABHD15     | 5.92E-05 | 1.40548 | 0.312 | 0.49 | 0.946336 | HC_vs_MS.NoTrt_F |
| CDKL5      | 5.93E-05 | 0.36602 | 0.962 | 0.93 | 0.947542 | HC_vs_MS.NoTrt_F |
| KCNJ6      | 6.14E-05 | 0.82418 | 0.873 | 0.83 | 0.981343 | HC_vs_MS.NoTrt_F |
| UBE2L6     | 6.14E-05 | -0.3134 | 0.257 | 0.44 | 0.981359 | HC_vs_MS.NoTrt_F |
| ACP1       | 6.29E-05 | -0.3138 | 0.266 | 0.44 | 1        | HC_vs_MS.NoTrt_F |
| PGM2       | 6.34E-05 | -1.1815 | 0.13  | 0.27 | 1        | HC_vs_MS.NoTrt_F |
| SAP18      | 6.40E-05 | -0.2959 | 0.367 | 0.56 | 1        | HC_vs_MS.NoTrt_F |
| ZBTB39     | 6.41E-05 | -0.7907 | 0.029 | 0.12 | 1        | HC_vs_MS.NoTrt_F |
| TRIM47     | 6.41E-05 | -0.9873 | 0.058 | 0.17 | 1        | HC_vs_MS.NoTrt_F |

|            |          |         |       |      |   |                  |
|------------|----------|---------|-------|------|---|------------------|
| FOXN2      | 6.42E-05 | -0.3471 | 0.272 | 0.45 | 1 | HC_vs_MS.NoTrt_F |
| ITFG1      | 6.46E-05 | -0.2641 | 0.211 | 0.37 | 1 | HC_vs_MS.NoTrt_F |
| GIMAP1-GIM | 6.46E-05 | -0.5778 | 0.072 | 0.19 | 1 | HC_vs_MS.NoTrt_F |
| CHKB-CPT1E | 6.57E-05 | -0.4876 | 0.029 | 0.12 | 1 | HC_vs_MS.NoTrt_F |
| POLR2M     | 6.59E-05 | -1.1516 | 0.165 | 0.3  | 1 | HC_vs_MS.NoTrt_F |
| BBS7       | 7.02E-05 | -1.3894 | 0.055 | 0.16 | 1 | HC_vs_MS.NoTrt_F |
| OR52A1     | 7.03E-05 | 0.51766 | 0.829 | 0.75 | 1 | HC_vs_MS.NoTrt_F |
| PDIK1L     | 7.04E-05 | -1.5659 | 0.066 | 0.18 | 1 | HC_vs_MS.NoTrt_F |
| ZNF263     | 7.12E-05 | -1.0849 | 0.064 | 0.17 | 1 | HC_vs_MS.NoTrt_F |
| TERF2IP    | 7.20E-05 | -0.2977 | 0.396 | 0.56 | 1 | HC_vs_MS.NoTrt_F |
| ANTXR2     | 7.23E-05 | -0.3672 | 0.697 | 0.83 | 1 | HC_vs_MS.NoTrt_F |
| ARHGAP19   | 7.26E-05 | -0.5265 | 0.277 | 0.44 | 1 | HC_vs_MS.NoTrt_F |
| CUTC       | 7.33E-05 | -0.7963 | 0.162 | 0.3  | 1 | HC_vs_MS.NoTrt_F |
| ZC3H3      | 7.51E-05 | -0.599  | 0.153 | 0.29 | 1 | HC_vs_MS.NoTrt_F |
| SNAP47     | 7.52E-05 | -0.4577 | 0.171 | 0.32 | 1 | HC_vs_MS.NoTrt_F |
| TRIM37     | 7.58E-05 | -0.9193 | 0.24  | 0.38 | 1 | HC_vs_MS.NoTrt_F |
| ARL3       | 7.86E-05 | -0.4097 | 0.069 | 0.18 | 1 | HC_vs_MS.NoTrt_F |
| CTD-3105H1 | 7.96E-05 | -0.2682 | 0.292 | 0.46 | 1 | HC_vs_MS.NoTrt_F |
| RNF20      | 8.02E-05 | -0.5681 | 0.15  | 0.29 | 1 | HC_vs_MS.NoTrt_F |
| SURF2      | 8.05E-05 | -0.6171 | 0.13  | 0.27 | 1 | HC_vs_MS.NoTrt_F |
| SLAIN2     | 8.13E-05 | -0.3606 | 0.162 | 0.3  | 1 | HC_vs_MS.NoTrt_F |
| EIF3D      | 8.14E-05 | -0.2991 | 0.416 | 0.6  | 1 | HC_vs_MS.NoTrt_F |
| AATF       | 8.21E-05 | -0.4706 | 0.208 | 0.36 | 1 | HC_vs_MS.NoTrt_F |
| RUNX2      | 8.27E-05 | -0.4514 | 0.202 | 0.37 | 1 | HC_vs_MS.NoTrt_F |
| STX18      | 8.39E-05 | -0.5086 | 0.159 | 0.3  | 1 | HC_vs_MS.NoTrt_F |
| C14orf169  | 8.49E-05 | -0.7189 | 0.066 | 0.18 | 1 | HC_vs_MS.NoTrt_F |
| EIF3G      | 8.56E-05 | -0.3134 | 0.853 | 0.96 | 1 | HC_vs_MS.NoTrt_F |
| RPLP0      | 8.58E-05 | -0.2528 | 0.925 | 0.97 | 1 | HC_vs_MS.NoTrt_F |
| SEC24A     | 8.61E-05 | -0.3783 | 0.066 | 0.18 | 1 | HC_vs_MS.NoTrt_F |
| SETD2      | 8.69E-05 | -0.5127 | 0.399 | 0.57 | 1 | HC_vs_MS.NoTrt_F |
| ORMDL1     | 8.76E-05 | -0.4043 | 0.318 | 0.5  | 1 | HC_vs_MS.NoTrt_F |
| YPEL2      | 8.81E-05 | -0.5315 | 0.214 | 0.36 | 1 | HC_vs_MS.NoTrt_F |
| CHPF2      | 9.02E-05 | -0.6226 | 0.095 | 0.22 | 1 | HC_vs_MS.NoTrt_F |
| ICAM2      | 9.03E-05 | -0.2529 | 0.743 | 0.84 | 1 | HC_vs_MS.NoTrt_F |
| GBP2       | 9.07E-05 | -0.3199 | 0.46  | 0.64 | 1 | HC_vs_MS.NoTrt_F |
| RPS29      | 9.13E-05 | 0.6643  | 0.948 | 0.94 | 1 | HC_vs_MS.NoTrt_F |
| SMC3       | 9.14E-05 | -0.3985 | 0.309 | 0.47 | 1 | HC_vs_MS.NoTrt_F |
| FADD       | 9.24E-05 | -0.9011 | 0.092 | 0.21 | 1 | HC_vs_MS.NoTrt_F |
| USP20      | 9.36E-05 | -0.3533 | 0.249 | 0.41 | 1 | HC_vs_MS.NoTrt_F |
| EPAS1      | 9.48E-05 | 2.85906 | 0.272 | 0.14 | 1 | HC_vs_MS.NoTrt_F |

|           |          |         |       |      |   |                  |
|-----------|----------|---------|-------|------|---|------------------|
| CYB5R1    | 9.60E-05 | -0.657  | 0.104 | 0.23 | 1 | HC_vs_MS.NoTrt_F |
| THOC7     | 9.76E-05 | -0.5195 | 0.159 | 0.3  | 1 | HC_vs_MS.NoTrt_F |
| CCL5      | 9.76E-05 | 1.05229 | 0.936 | 0.94 | 1 | HC_vs_MS.NoTrt_F |
| CDKN2A    | 9.99E-05 | -0.4288 | 0.069 | 0.18 | 1 | HC_vs_MS.NoTrt_F |
| GTF2A1    | 1.00E-04 | -1.3779 | 0.061 | 0.17 | 1 | HC_vs_MS.NoTrt_F |
| CCDC13    | 1.02E-04 | -0.4982 | 0.289 | 0.47 | 1 | HC_vs_MS.NoTrt_F |
| TMEM115   | 1.02E-04 | -0.7923 | 0.107 | 0.23 | 1 | HC_vs_MS.NoTrt_F |
| CD5       | 1.03E-04 | -0.2896 | 0.457 | 0.66 | 1 | HC_vs_MS.NoTrt_F |
| GABARAPL2 | 1.04E-04 | -0.6787 | 0.555 | 0.66 | 1 | HC_vs_MS.NoTrt_F |
| RTKN2     | 1.05E-04 | -0.5306 | 0.532 | 0.66 | 1 | HC_vs_MS.NoTrt_F |
| ACAD10    | 1.06E-04 | -0.9702 | 0.506 | 0.64 | 1 | HC_vs_MS.NoTrt_F |
| SLC3A2    | 1.06E-04 | -0.3015 | 0.503 | 0.66 | 1 | HC_vs_MS.NoTrt_F |
| EID3      | 1.09E-04 | -0.6565 | 0.046 | 0.14 | 1 | HC_vs_MS.NoTrt_F |
| DPP7      | 1.09E-04 | -0.2505 | 0.341 | 0.53 | 1 | HC_vs_MS.NoTrt_F |
| MPC1      | 1.10E-04 | -0.5013 | 0.145 | 0.28 | 1 | HC_vs_MS.NoTrt_F |
| HDAC3     | 1.11E-04 | -0.7377 | 0.156 | 0.29 | 1 | HC_vs_MS.NoTrt_F |
| TAF9B     | 1.14E-04 | -0.6602 | 0.118 | 0.25 | 1 | HC_vs_MS.NoTrt_F |
| ADCK2     | 1.14E-04 | -1.0924 | 0.038 | 0.13 | 1 | HC_vs_MS.NoTrt_F |
| CA6       | 1.14E-04 | 0.33417 | 0.821 | 0.69 | 1 | HC_vs_MS.NoTrt_F |
| STUB1     | 1.15E-04 | -0.6282 | 0.095 | 0.22 | 1 | HC_vs_MS.NoTrt_F |
| PPDPF     | 1.16E-04 | 1.335   | 0.514 | 0.45 | 1 | HC_vs_MS.NoTrt_F |
| PIN4      | 1.16E-04 | -0.5328 | 0.133 | 0.26 | 1 | HC_vs_MS.NoTrt_F |
| YWHAZ     | 1.16E-04 | 0.35317 | 0.968 | 0.98 | 1 | HC_vs_MS.NoTrt_F |
| CBX4      | 1.16E-04 | -0.3594 | 0.046 | 0.14 | 1 | HC_vs_MS.NoTrt_F |
| P2RY8     | 1.17E-04 | -0.2577 | 0.434 | 0.61 | 1 | HC_vs_MS.NoTrt_F |
| RAPGEF5   | 1.17E-04 | 1.22176 | 0.101 | 0.01 | 1 | HC_vs_MS.NoTrt_F |
| TJP3      | 1.18E-04 | -1.5444 | 0.095 | 0.21 | 1 | HC_vs_MS.NoTrt_F |
| POLDIP2   | 1.18E-04 | -0.4774 | 0.136 | 0.27 | 1 | HC_vs_MS.NoTrt_F |
| BUB3      | 1.19E-04 | -0.4186 | 0.668 | 0.8  | 1 | HC_vs_MS.NoTrt_F |
| PCMTD1    | 1.20E-04 | -0.5923 | 0.312 | 0.48 | 1 | HC_vs_MS.NoTrt_F |
| SCAMP2    | 1.21E-04 | -0.2591 | 0.329 | 0.52 | 1 | HC_vs_MS.NoTrt_F |
| RAB39B    | 1.21E-04 | -0.898  | 0.035 | 0.12 | 1 | HC_vs_MS.NoTrt_F |
| GON7      | 1.21E-04 | -0.6046 | 0.035 | 0.12 | 1 | HC_vs_MS.NoTrt_F |
| OXLD1     | 1.22E-04 | -0.5586 | 0.127 | 0.26 | 1 | HC_vs_MS.NoTrt_F |
| SERINC4   | 1.22E-04 | -0.5781 | 0.058 | 0.16 | 1 | HC_vs_MS.NoTrt_F |
| TNFSF13B  | 1.25E-04 | -0.2686 | 0.642 | 0.72 | 1 | HC_vs_MS.NoTrt_F |
| DOLK      | 1.26E-04 | -0.6839 | 0.029 | 0.11 | 1 | HC_vs_MS.NoTrt_F |
| BLOC1S6   | 1.26E-04 | 0.44259 | 0.997 | 0.99 | 1 | HC_vs_MS.NoTrt_F |
| CLEC4A    | 1.27E-04 | -0.2643 | 0.04  | 0.13 | 1 | HC_vs_MS.NoTrt_F |
| AGAP6     | 1.27E-04 | -0.4771 | 0.127 | 0.25 | 1 | HC_vs_MS.NoTrt_F |

|             |          |         |       |      |   |                  |
|-------------|----------|---------|-------|------|---|------------------|
| MGAT4C      | 1.27E-04 | 0.49108 | 0.835 | 0.7  | 1 | HC_vs_MS.NoTrt_F |
| POMT2       | 1.29E-04 | 0.47718 | 0.965 | 0.95 | 1 | HC_vs_MS.NoTrt_F |
| UTP3        | 1.30E-04 | -0.889  | 0.032 | 0.12 | 1 | HC_vs_MS.NoTrt_F |
| GPR18       | 1.30E-04 | -0.4549 | 0.072 | 0.18 | 1 | HC_vs_MS.NoTrt_F |
| PBX4        | 1.31E-04 | -0.4542 | 0.197 | 0.35 | 1 | HC_vs_MS.NoTrt_F |
| ZDHHC24     | 1.31E-04 | 0.30801 | 0.942 | 0.87 | 1 | HC_vs_MS.NoTrt_F |
| TSSC4       | 1.33E-04 | -0.3826 | 0.127 | 0.26 | 1 | HC_vs_MS.NoTrt_F |
| TMEM212     | 1.36E-04 | 0.38083 | 0.974 | 0.96 | 1 | HC_vs_MS.NoTrt_F |
| UBE2L3      | 1.37E-04 | -0.6191 | 0.286 | 0.45 | 1 | HC_vs_MS.NoTrt_F |
| ATP5J2-PTCI | 1.39E-04 | -0.5437 | 0.032 | 0.12 | 1 | HC_vs_MS.NoTrt_F |
| KPNA5       | 1.39E-04 | 0.29172 | 0.997 | 0.98 | 1 | HC_vs_MS.NoTrt_F |
| IFI27L1     | 1.40E-04 | 0.40532 | 0.035 | 0.12 | 1 | HC_vs_MS.NoTrt_F |
| SCAF11      | 1.40E-04 | -0.3537 | 0.899 | 0.93 | 1 | HC_vs_MS.NoTrt_F |
| ZNF92       | 1.40E-04 | -1.5066 | 0.11  | 0.23 | 1 | HC_vs_MS.NoTrt_F |
| MKRN2       | 1.40E-04 | -0.5509 | 0.118 | 0.24 | 1 | HC_vs_MS.NoTrt_F |
| PREP        | 1.41E-04 | -0.3086 | 0.13  | 0.26 | 1 | HC_vs_MS.NoTrt_F |
| KCTD5       | 1.42E-04 | -1.1947 | 0.081 | 0.19 | 1 | HC_vs_MS.NoTrt_F |
| RAB10       | 1.43E-04 | -0.4532 | 0.225 | 0.37 | 1 | HC_vs_MS.NoTrt_F |
| CSK         | 1.44E-04 | -0.298  | 0.283 | 0.46 | 1 | HC_vs_MS.NoTrt_F |
| NOC4L       | 1.45E-04 | -0.4465 | 0.075 | 0.19 | 1 | HC_vs_MS.NoTrt_F |
| GNG11       | 1.45E-04 | 0.98684 | 0.136 | 0.03 | 1 | HC_vs_MS.NoTrt_F |
| TMEM230     | 1.47E-04 | -0.3458 | 0.46  | 0.63 | 1 | HC_vs_MS.NoTrt_F |
| TRIB2       | 1.47E-04 | -0.8776 | 0.367 | 0.5  | 1 | HC_vs_MS.NoTrt_F |
| CAP1        | 1.48E-04 | -0.3725 | 0.618 | 0.79 | 1 | HC_vs_MS.NoTrt_F |
| SMIM15      | 1.50E-04 | -0.9022 | 0.104 | 0.22 | 1 | HC_vs_MS.NoTrt_F |
| MARS2       | 1.50E-04 | -0.5101 | 0.055 | 0.16 | 1 | HC_vs_MS.NoTrt_F |
| CD164       | 1.52E-04 | -0.4038 | 0.598 | 0.73 | 1 | HC_vs_MS.NoTrt_F |
| COPG1       | 1.53E-04 | -0.8639 | 0.173 | 0.32 | 1 | HC_vs_MS.NoTrt_F |
| ZNF184      | 1.56E-04 | -0.4949 | 0.087 | 0.2  | 1 | HC_vs_MS.NoTrt_F |
| ZRANB2      | 1.59E-04 | -0.4769 | 0.353 | 0.51 | 1 | HC_vs_MS.NoTrt_F |
| MCM9        | 1.60E-04 | -1.1878 | 0.341 | 0.48 | 1 | HC_vs_MS.NoTrt_F |
| JUN         | 1.60E-04 | -0.3529 | 0.491 | 0.64 | 1 | HC_vs_MS.NoTrt_F |
| RAB35       | 1.61E-04 | -0.748  | 0.168 | 0.3  | 1 | HC_vs_MS.NoTrt_F |
| UNC119B     | 1.63E-04 | -0.5429 | 0.052 | 0.15 | 1 | HC_vs_MS.NoTrt_F |
| IFT43       | 1.64E-04 | -0.6274 | 0.069 | 0.18 | 1 | HC_vs_MS.NoTrt_F |
| BRPF1       | 1.64E-04 | -0.553  | 0.075 | 0.18 | 1 | HC_vs_MS.NoTrt_F |
| PRDX1       | 1.67E-04 | -0.2539 | 0.607 | 0.75 | 1 | HC_vs_MS.NoTrt_F |
| FAM173A     | 1.67E-04 | 0.2604  | 0.069 | 0.18 | 1 | HC_vs_MS.NoTrt_F |
| NFYB        | 1.68E-04 | -1.2086 | 0.303 | 0.43 | 1 | HC_vs_MS.NoTrt_F |
| SETD3       | 1.69E-04 | -0.5309 | 0.121 | 0.25 | 1 | HC_vs_MS.NoTrt_F |



|          |          |         |       |      |   |                  |
|----------|----------|---------|-------|------|---|------------------|
| CIAPIN1  | 1.69E-04 | -0.6661 | 0.098 | 0.22 | 1 | HC_vs_MS.NoTrt_F |
| TMEM9B   | 1.70E-04 | -0.332  | 0.228 | 0.39 | 1 | HC_vs_MS.NoTrt_F |
| PRKAR1A  | 1.71E-04 | -0.3249 | 0.353 | 0.52 | 1 | HC_vs_MS.NoTrt_F |
| UBE2K    | 1.71E-04 | -0.5309 | 0.162 | 0.3  | 1 | HC_vs_MS.NoTrt_F |
| PCF11    | 1.71E-04 | -0.4111 | 0.512 | 0.65 | 1 | HC_vs_MS.NoTrt_F |
| CXXC1    | 1.74E-04 | -0.3966 | 0.211 | 0.37 | 1 | HC_vs_MS.NoTrt_F |
| KBTBD4   | 1.77E-04 | -0.7592 | 0.084 | 0.19 | 1 | HC_vs_MS.NoTrt_F |
| NPM1     | 1.78E-04 | -0.2795 | 0.636 | 0.78 | 1 | HC_vs_MS.NoTrt_F |
| DCAF15   | 1.79E-04 | -0.4178 | 0.052 | 0.15 | 1 | HC_vs_MS.NoTrt_F |
| CHMP7    | 1.86E-04 | -0.5478 | 0.465 | 0.6  | 1 | HC_vs_MS.NoTrt_F |
| PCDHGA6  | 1.87E-04 | 0.52171 | 0.85  | 0.75 | 1 | HC_vs_MS.NoTrt_F |
| YWHAG    | 1.87E-04 | -0.3213 | 0.145 | 0.28 | 1 | HC_vs_MS.NoTrt_F |
| SGPP1    | 1.91E-04 | 0.26988 | 0.104 | 0.23 | 1 | HC_vs_MS.NoTrt_F |
| TCP1     | 1.96E-04 | -0.5431 | 0.428 | 0.58 | 1 | HC_vs_MS.NoTrt_F |
| NDC1     | 1.97E-04 | -0.5374 | 0.066 | 0.17 | 1 | HC_vs_MS.NoTrt_F |
| ZNF142   | 1.97E-04 | -0.6364 | 0.136 | 0.27 | 1 | HC_vs_MS.NoTrt_F |
| IK       | 1.99E-04 | -0.3066 | 0.803 | 0.93 | 1 | HC_vs_MS.NoTrt_F |
| GOPC     | 2.02E-04 | -0.661  | 0.145 | 0.28 | 1 | HC_vs_MS.NoTrt_F |
| ATP6V1G1 | 2.02E-04 | -0.2652 | 0.425 | 0.62 | 1 | HC_vs_MS.NoTrt_F |
| COMMD1   | 2.03E-04 | 0.53747 | 0.621 | 0.82 | 1 | HC_vs_MS.NoTrt_F |
| TMF1     | 2.03E-04 | -0.2707 | 0.228 | 0.39 | 1 | HC_vs_MS.NoTrt_F |
| EPSTI1   | 2.04E-04 | -0.7316 | 0.173 | 0.32 | 1 | HC_vs_MS.NoTrt_F |
| FH       | 2.04E-04 | -0.2667 | 0.075 | 0.18 | 1 | HC_vs_MS.NoTrt_F |
| DNAJC10  | 2.05E-04 | 0.26479 | 0.974 | 0.97 | 1 | HC_vs_MS.NoTrt_F |
| PERP     | 2.06E-04 | -0.5554 | 0.087 | 0.2  | 1 | HC_vs_MS.NoTrt_F |
| PDCD2L   | 2.07E-04 | -1.3865 | 0.043 | 0.13 | 1 | HC_vs_MS.NoTrt_F |
| C3orf58  | 2.10E-04 | -0.6342 | 0.104 | 0.22 | 1 | HC_vs_MS.NoTrt_F |
| MED7     | 2.10E-04 | -0.4026 | 0.081 | 0.19 | 1 | HC_vs_MS.NoTrt_F |
| CFAP69   | 2.12E-04 | 0.53057 | 0.873 | 0.82 | 1 | HC_vs_MS.NoTrt_F |
| TIMP3    | 2.14E-04 | 1.86254 | 0.228 | 0.11 | 1 | HC_vs_MS.NoTrt_F |
| RB1CC1   | 2.20E-04 | -0.7781 | 0.306 | 0.44 | 1 | HC_vs_MS.NoTrt_F |
| HSPA1L   | 2.20E-04 | -1.0201 | 0.04  | 0.13 | 1 | HC_vs_MS.NoTrt_F |
| DGUOK    | 2.23E-04 | -0.3088 | 0.217 | 0.37 | 1 | HC_vs_MS.NoTrt_F |
| OPHN1    | 2.27E-04 | 0.3928  | 0.977 | 0.98 | 1 | HC_vs_MS.NoTrt_F |
| SHMT2    | 2.32E-04 | -0.6611 | 0.254 | 0.4  | 1 | HC_vs_MS.NoTrt_F |
| R3HCC1L  | 2.35E-04 | -0.2531 | 0.298 | 0.45 | 1 | HC_vs_MS.NoTrt_F |
| ANKRD18A | 2.37E-04 | -0.6404 | 0.28  | 0.42 | 1 | HC_vs_MS.NoTrt_F |
| HKDC1    | 2.40E-04 | -0.7953 | 0.061 | 0.16 | 1 | HC_vs_MS.NoTrt_F |
| SEPHS1   | 2.40E-04 | -0.5041 | 0.075 | 0.18 | 1 | HC_vs_MS.NoTrt_F |
| MSN      | 2.44E-04 | -0.3572 | 0.598 | 0.75 | 1 | HC_vs_MS.NoTrt_F |

|            |          |         |       |      |   |                  |
|------------|----------|---------|-------|------|---|------------------|
| NDUFAF3    | 2.46E-04 | -0.3815 | 0.185 | 0.33 | 1 | HC_vs_MS.NoTrt_F |
| EIF4E3     | 2.49E-04 | -0.7895 | 0.176 | 0.32 | 1 | HC_vs_MS.NoTrt_F |
| MT-ND1     | 2.50E-04 | 0.589   | 0.945 | 0.94 | 1 | HC_vs_MS.NoTrt_F |
| CLPTM1L    | 2.52E-04 | 1.58615 | 0.078 | 0.19 | 1 | HC_vs_MS.NoTrt_F |
| STRIP1     | 2.54E-04 | -0.6823 | 0.179 | 0.31 | 1 | HC_vs_MS.NoTrt_F |
| MIF4GD     | 2.55E-04 | -0.2631 | 0.142 | 0.28 | 1 | HC_vs_MS.NoTrt_F |
| CCDC65     | 2.57E-04 | -0.643  | 0.069 | 0.17 | 1 | HC_vs_MS.NoTrt_F |
| ZC3H7A     | 2.60E-04 | -0.4297 | 0.416 | 0.56 | 1 | HC_vs_MS.NoTrt_F |
| METTL13    | 2.64E-04 | -0.5802 | 0.072 | 0.18 | 1 | HC_vs_MS.NoTrt_F |
| C9orf84    | 2.64E-04 | -0.8204 | 0.043 | 0.13 | 1 | HC_vs_MS.NoTrt_F |
| RP11-307N1 | 2.65E-04 | -0.3582 | 0.116 | 0.24 | 1 | HC_vs_MS.NoTrt_F |
| RUNDC3B    | 2.70E-04 | -0.3196 | 0.309 | 0.44 | 1 | HC_vs_MS.NoTrt_F |
| GOLGA1     | 2.72E-04 | -1.0635 | 0.127 | 0.24 | 1 | HC_vs_MS.NoTrt_F |
| AHCTF1     | 2.72E-04 | -0.4295 | 0.171 | 0.3  | 1 | HC_vs_MS.NoTrt_F |
| CTTN       | 2.74E-04 | 1.68121 | 0.295 | 0.16 | 1 | HC_vs_MS.NoTrt_F |
| ARHGAP9    | 2.78E-04 | -0.304  | 0.624 | 0.77 | 1 | HC_vs_MS.NoTrt_F |
| UBR7       | 2.79E-04 | -0.4768 | 0.13  | 0.25 | 1 | HC_vs_MS.NoTrt_F |
| RNF126     | 2.81E-04 | -0.3962 | 0.22  | 0.37 | 1 | HC_vs_MS.NoTrt_F |
| SPARC      | 2.81E-04 | 2.20284 | 0.249 | 0.13 | 1 | HC_vs_MS.NoTrt_F |
| WBP1L      | 2.81E-04 | -1.3442 | 0.124 | 0.24 | 1 | HC_vs_MS.NoTrt_F |
| IRF7       | 2.82E-04 | -0.268  | 0.145 | 0.28 | 1 | HC_vs_MS.NoTrt_F |
| TMEM205    | 2.84E-04 | -0.5513 | 0.118 | 0.24 | 1 | HC_vs_MS.NoTrt_F |
| SPATA4     | 2.85E-04 | 0.49935 | 0.72  | 0.54 | 1 | HC_vs_MS.NoTrt_F |
| RP11-500M8 | 2.87E-04 | -0.4272 | 0.124 | 0.25 | 1 | HC_vs_MS.NoTrt_F |
| DNTTIP2    | 2.87E-04 | 0.28743 | 0.96  | 0.95 | 1 | HC_vs_MS.NoTrt_F |
| STX16-NPEP | 2.89E-04 | -0.409  | 0.113 | 0.23 | 1 | HC_vs_MS.NoTrt_F |
| ZNF77      | 2.90E-04 | -1.4175 | 0.035 | 0.12 | 1 | HC_vs_MS.NoTrt_F |
| C6orf47    | 2.90E-04 | -0.7721 | 0.107 | 0.22 | 1 | HC_vs_MS.NoTrt_F |
| LEF1       | 2.90E-04 | -0.2701 | 0.379 | 0.55 | 1 | HC_vs_MS.NoTrt_F |
| ACOT8      | 2.92E-04 | -0.4936 | 0.13  | 0.25 | 1 | HC_vs_MS.NoTrt_F |
| LYPLA2     | 2.95E-04 | -0.2958 | 0.208 | 0.36 | 1 | HC_vs_MS.NoTrt_F |
| ZSWIM6     | 2.96E-04 | -0.2581 | 0.072 | 0.18 | 1 | HC_vs_MS.NoTrt_F |
| RGPD5      | 2.97E-04 | 0.65197 | 0.919 | 0.9  | 1 | HC_vs_MS.NoTrt_F |
| C2orf76    | 3.01E-04 | -0.7167 | 0.029 | 0.11 | 1 | HC_vs_MS.NoTrt_F |
| KCNN4      | 3.03E-04 | -0.3227 | 0.182 | 0.32 | 1 | HC_vs_MS.NoTrt_F |
| FAM21A     | 3.05E-04 | -0.7007 | 0.225 | 0.38 | 1 | HC_vs_MS.NoTrt_F |
| RP11-108K1 | 3.09E-04 | -0.2665 | 0.029 | 0.11 | 1 | HC_vs_MS.NoTrt_F |
| LEKR1      | 3.10E-04 | -0.4909 | 0.176 | 0.32 | 1 | HC_vs_MS.NoTrt_F |
| BUB1       | 3.10E-04 | -1.3685 | 0.029 | 0.11 | 1 | HC_vs_MS.NoTrt_F |
| DUT        | 3.11E-04 | -0.3037 | 0.165 | 0.3  | 1 | HC_vs_MS.NoTrt_F |

|            |          |         |       |      |   |                  |
|------------|----------|---------|-------|------|---|------------------|
| GOLGA5     | 3.13E-04 | -0.8264 | 0.142 | 0.27 | 1 | HC_vs_MS.NoTrt_F |
| SIRT6      | 3.13E-04 | -0.8016 | 0.066 | 0.17 | 1 | HC_vs_MS.NoTrt_F |
| SLC16A6    | 3.13E-04 | -0.6055 | 0.275 | 0.41 | 1 | HC_vs_MS.NoTrt_F |
| TMEM248    | 3.16E-04 | -0.5234 | 0.22  | 0.35 | 1 | HC_vs_MS.NoTrt_F |
| RNF121     | 3.18E-04 | -0.4548 | 0.361 | 0.51 | 1 | HC_vs_MS.NoTrt_F |
| RBM22      | 3.22E-04 | -0.2644 | 0.165 | 0.3  | 1 | HC_vs_MS.NoTrt_F |
| NPDC1      | 3.23E-04 | -0.2546 | 0.069 | 0.17 | 1 | HC_vs_MS.NoTrt_F |
| NKRF       | 3.25E-04 | -0.3279 | 0.072 | 0.18 | 1 | HC_vs_MS.NoTrt_F |
| ALKBH7     | 3.27E-04 | -0.3707 | 0.133 | 0.26 | 1 | HC_vs_MS.NoTrt_F |
| RAB40C     | 3.27E-04 | -0.3064 | 0.032 | 0.11 | 1 | HC_vs_MS.NoTrt_F |
| GOLGA7     | 3.37E-04 | -0.3517 | 0.199 | 0.34 | 1 | HC_vs_MS.NoTrt_F |
| GLYR1      | 3.39E-04 | -0.4138 | 0.419 | 0.54 | 1 | HC_vs_MS.NoTrt_F |
| ARHGEF11   | 3.42E-04 | 0.79    | 0.052 | 0.14 | 1 | HC_vs_MS.NoTrt_F |
| PRDM4      | 3.46E-04 | -0.4516 | 0.069 | 0.17 | 1 | HC_vs_MS.NoTrt_F |
| C7orf26    | 3.47E-04 | 0.31051 | 0.098 | 0.21 | 1 | HC_vs_MS.NoTrt_F |
| HCFC2      | 3.48E-04 | -0.9501 | 0.078 | 0.18 | 1 | HC_vs_MS.NoTrt_F |
| C7orf43    | 3.51E-04 | 0.421   | 0.052 | 0.14 | 1 | HC_vs_MS.NoTrt_F |
| HOXB3      | 3.52E-04 | 0.48124 | 0.052 | 0.14 | 1 | HC_vs_MS.NoTrt_F |
| PPCDC      | 3.53E-04 | -0.5851 | 0.081 | 0.19 | 1 | HC_vs_MS.NoTrt_F |
| ZNF740     | 3.55E-04 | 0.30877 | 0.153 | 0.29 | 1 | HC_vs_MS.NoTrt_F |
| LTV1       | 3.56E-04 | -0.7082 | 0.139 | 0.26 | 1 | HC_vs_MS.NoTrt_F |
| CANT1      | 3.59E-04 | -0.8978 | 0.095 | 0.2  | 1 | HC_vs_MS.NoTrt_F |
| ZDHC8      | 3.64E-04 | -0.3174 | 0.095 | 0.2  | 1 | HC_vs_MS.NoTrt_F |
| MPHOSPH6   | 3.67E-04 | -0.8846 | 0.145 | 0.27 | 1 | HC_vs_MS.NoTrt_F |
| AC127070.1 | 3.67E-04 | -0.3481 | 0.066 | 0.17 | 1 | HC_vs_MS.NoTrt_F |
| OPTN       | 3.76E-04 | -0.4676 | 0.728 | 0.83 | 1 | HC_vs_MS.NoTrt_F |
| PRMT9      | 3.77E-04 | 0.70572 | 0.223 | 0.38 | 1 | HC_vs_MS.NoTrt_F |
| ACCS       | 3.77E-04 | -1.1491 | 0.072 | 0.17 | 1 | HC_vs_MS.NoTrt_F |
| SS18L2     | 3.77E-04 | -0.4913 | 0.358 | 0.5  | 1 | HC_vs_MS.NoTrt_F |
| GIMAP6     | 3.81E-04 | -0.595  | 0.202 | 0.34 | 1 | HC_vs_MS.NoTrt_F |
| SLC12A7    | 3.82E-04 | -0.6987 | 0.147 | 0.28 | 1 | HC_vs_MS.NoTrt_F |
| MTRR       | 3.84E-04 | -0.5363 | 0.208 | 0.35 | 1 | HC_vs_MS.NoTrt_F |
| FKBP8      | 3.84E-04 | 0.49944 | 0.234 | 0.38 | 1 | HC_vs_MS.NoTrt_F |
| C19orf43   | 3.86E-04 | -0.4185 | 0.182 | 0.32 | 1 | HC_vs_MS.NoTrt_F |
| FAM210B    | 3.87E-04 | -0.8849 | 0.312 | 0.46 | 1 | HC_vs_MS.NoTrt_F |
| KIAA0196   | 3.90E-04 | -0.3746 | 0.153 | 0.28 | 1 | HC_vs_MS.NoTrt_F |
| GPR171     | 3.95E-04 | -1.6235 | 0.043 | 0.13 | 1 | HC_vs_MS.NoTrt_F |
| FBLN5      | 3.95E-04 | -0.6867 | 0.199 | 0.33 | 1 | HC_vs_MS.NoTrt_F |
| FAM98A     | 3.96E-04 | -0.6619 | 0.064 | 0.16 | 1 | HC_vs_MS.NoTrt_F |
| STK32C     | 3.96E-04 | -0.4956 | 0.046 | 0.13 | 1 | HC_vs_MS.NoTrt_F |

|            |          |         |       |      |   |                  |
|------------|----------|---------|-------|------|---|------------------|
| GPATCH3    | 3.96E-04 | -0.9311 | 0.072 | 0.17 | 1 | HC_vs_MS.NoTrt_F |
| RP11-159D1 | 3.97E-04 | -0.5334 | 0.139 | 0.26 | 1 | HC_vs_MS.NoTrt_F |
| LRRRC61    | 3.98E-04 | -0.9762 | 0.072 | 0.17 | 1 | HC_vs_MS.NoTrt_F |
| PRMT5      | 3.98E-04 | -0.7445 | 0.061 | 0.16 | 1 | HC_vs_MS.NoTrt_F |
| TMEM14A    | 3.99E-04 | -0.5399 | 0.101 | 0.21 | 1 | HC_vs_MS.NoTrt_F |
| GDI2       | 4.01E-04 | -0.2899 | 0.451 | 0.6  | 1 | HC_vs_MS.NoTrt_F |
| CA4        | 4.02E-04 | 1.91289 | 0.211 | 0.1  | 1 | HC_vs_MS.NoTrt_F |
| LBR        | 4.03E-04 | -0.4897 | 0.249 | 0.39 | 1 | HC_vs_MS.NoTrt_F |
| GTF2F2     | 4.03E-04 | -0.6865 | 0.211 | 0.34 | 1 | HC_vs_MS.NoTrt_F |
| AP1S1      | 4.04E-04 | -0.42   | 0.064 | 0.16 | 1 | HC_vs_MS.NoTrt_F |
| HHIPL1     | 4.05E-04 | -0.3031 | 0.121 | 0.24 | 1 | HC_vs_MS.NoTrt_F |
| RNF123     | 4.09E-04 | -0.7403 | 0.156 | 0.29 | 1 | HC_vs_MS.NoTrt_F |
| EMC9       | 4.12E-04 | -0.529  | 0.049 | 0.14 | 1 | HC_vs_MS.NoTrt_F |
| VPS16      | 4.17E-04 | -0.2975 | 0.153 | 0.29 | 1 | HC_vs_MS.NoTrt_F |
| ZFP62      | 4.19E-04 | -1.0319 | 0.09  | 0.19 | 1 | HC_vs_MS.NoTrt_F |
| COG3       | 4.20E-04 | -0.7682 | 0.168 | 0.29 | 1 | HC_vs_MS.NoTrt_F |
| CEMP1      | 4.21E-04 | -0.2877 | 0.078 | 0.18 | 1 | HC_vs_MS.NoTrt_F |
| PASK       | 4.25E-04 | -0.458  | 0.514 | 0.65 | 1 | HC_vs_MS.NoTrt_F |
| CP         | 4.26E-04 | -0.5413 | 0.15  | 0.27 | 1 | HC_vs_MS.NoTrt_F |
| MCM2       | 4.26E-04 | -1.5081 | 0.043 | 0.13 | 1 | HC_vs_MS.NoTrt_F |
| AC009950.1 | 4.29E-04 | -0.4963 | 0.064 | 0.16 | 1 | HC_vs_MS.NoTrt_F |
| APH1B      | 4.41E-04 | -0.8696 | 0.072 | 0.17 | 1 | HC_vs_MS.NoTrt_F |
| PDGFA      | 4.41E-04 | -0.2654 | 0.578 | 0.68 | 1 | HC_vs_MS.NoTrt_F |
| AGO3       | 4.43E-04 | 0.32677 | 0.986 | 0.98 | 1 | HC_vs_MS.NoTrt_F |
| NUS1       | 4.45E-04 | -0.3349 | 0.066 | 0.17 | 1 | HC_vs_MS.NoTrt_F |
| CHST6      | 4.46E-04 | 0.38784 | 0.916 | 0.88 | 1 | HC_vs_MS.NoTrt_F |
| RAB2A      | 4.47E-04 | -0.461  | 0.251 | 0.39 | 1 | HC_vs_MS.NoTrt_F |
| SOCS5      | 4.50E-04 | 0.5465  | 0.064 | 0.16 | 1 | HC_vs_MS.NoTrt_F |
| SESN2      | 4.52E-04 | -1.0065 | 0.043 | 0.13 | 1 | HC_vs_MS.NoTrt_F |
| PAPD7      | 4.54E-04 | -1.5087 | 0.087 | 0.19 | 1 | HC_vs_MS.NoTrt_F |
| CLEC2B     | 4.58E-04 | -0.4592 | 0.251 | 0.38 | 1 | HC_vs_MS.NoTrt_F |
| CRIP1      | 4.61E-04 | -0.3803 | 0.246 | 0.39 | 1 | HC_vs_MS.NoTrt_F |
| GEMIN7     | 4.62E-04 | -0.5448 | 0.22  | 0.35 | 1 | HC_vs_MS.NoTrt_F |
| ID3        | 4.63E-04 | -0.3312 | 0.237 | 0.38 | 1 | HC_vs_MS.NoTrt_F |
| THEM6      | 4.63E-04 | -0.5078 | 0.09  | 0.19 | 1 | HC_vs_MS.NoTrt_F |
| BLCAP      | 4.65E-04 | -0.4811 | 0.353 | 0.5  | 1 | HC_vs_MS.NoTrt_F |
| PIK3CA     | 4.65E-04 | 0.39591 | 0.046 | 0.13 | 1 | HC_vs_MS.NoTrt_F |
| ZNF232     | 4.67E-04 | -0.2886 | 0.043 | 0.13 | 1 | HC_vs_MS.NoTrt_F |
| TDRKH      | 4.69E-04 | -0.4716 | 0.075 | 0.18 | 1 | HC_vs_MS.NoTrt_F |
| HNRNPM     | 4.69E-04 | -0.4303 | 0.266 | 0.41 | 1 | HC_vs_MS.NoTrt_F |

|             |          |         |       |      |   |                  |
|-------------|----------|---------|-------|------|---|------------------|
| UFM1        | 4.75E-04 | -0.2977 | 0.405 | 0.55 | 1 | HC_vs_MS.NoTrt_F |
| PEX6        | 4.75E-04 | -0.6084 | 0.043 | 0.13 | 1 | HC_vs_MS.NoTrt_F |
| C9orf69     | 4.76E-04 | -0.6061 | 0.043 | 0.13 | 1 | HC_vs_MS.NoTrt_F |
| CWC22       | 4.77E-04 | -0.294  | 0.179 | 0.31 | 1 | HC_vs_MS.NoTrt_F |
| SNX3        | 4.78E-04 | -0.5117 | 0.182 | 0.32 | 1 | HC_vs_MS.NoTrt_F |
| ADPRHL2     | 4.82E-04 | -1.1457 | 0.095 | 0.2  | 1 | HC_vs_MS.NoTrt_F |
| PHF14       | 4.84E-04 | -0.3129 | 0.15  | 0.28 | 1 | HC_vs_MS.NoTrt_F |
| RBM15B      | 4.87E-04 | -1.2269 | 0.04  | 0.12 | 1 | HC_vs_MS.NoTrt_F |
| BYSL        | 4.88E-04 | -1.2225 | 0.066 | 0.16 | 1 | HC_vs_MS.NoTrt_F |
| RRAGB       | 4.89E-04 | -0.9331 | 0.084 | 0.18 | 1 | HC_vs_MS.NoTrt_F |
| PRDX6       | 4.89E-04 | -0.6748 | 0.173 | 0.29 | 1 | HC_vs_MS.NoTrt_F |
| AKIRIN1     | 4.93E-04 | -0.5788 | 0.535 | 0.68 | 1 | HC_vs_MS.NoTrt_F |
| DHRS4       | 4.94E-04 | -0.3841 | 0.116 | 0.23 | 1 | HC_vs_MS.NoTrt_F |
| OR2A7       | 4.95E-04 | -0.6911 | 0.043 | 0.13 | 1 | HC_vs_MS.NoTrt_F |
| CHCHD3      | 5.02E-04 | -0.4366 | 0.173 | 0.3  | 1 | HC_vs_MS.NoTrt_F |
| ZNF79       | 5.07E-04 | -0.4479 | 0.072 | 0.17 | 1 | HC_vs_MS.NoTrt_F |
| TRAPPC6A    | 5.07E-04 | -0.3721 | 0.185 | 0.32 | 1 | HC_vs_MS.NoTrt_F |
| MTERF4      | 5.09E-04 | -0.3745 | 0.431 | 0.56 | 1 | HC_vs_MS.NoTrt_F |
| BEX3        | 5.12E-04 | -0.7163 | 0.145 | 0.26 | 1 | HC_vs_MS.NoTrt_F |
| IL2RA       | 5.19E-04 | -0.3123 | 0.387 | 0.54 | 1 | HC_vs_MS.NoTrt_F |
| COA3        | 5.24E-04 | -0.4976 | 0.145 | 0.27 | 1 | HC_vs_MS.NoTrt_F |
| SMIM4       | 5.25E-04 | -0.7626 | 0.064 | 0.16 | 1 | HC_vs_MS.NoTrt_F |
| MORC2       | 5.26E-04 | -0.2659 | 0.434 | 0.54 | 1 | HC_vs_MS.NoTrt_F |
| PHC1        | 5.28E-04 | -0.6316 | 0.124 | 0.24 | 1 | HC_vs_MS.NoTrt_F |
| MS4A15      | 5.31E-04 | -0.4114 | 0.038 | 0.12 | 1 | HC_vs_MS.NoTrt_F |
| NAXD        | 5.37E-04 | -0.9036 | 0.087 | 0.19 | 1 | HC_vs_MS.NoTrt_F |
| ATRIP       | 5.38E-04 | -0.4116 | 0.127 | 0.24 | 1 | HC_vs_MS.NoTrt_F |
| ARPC5L      | 5.40E-04 | -0.4211 | 0.197 | 0.33 | 1 | HC_vs_MS.NoTrt_F |
| METTL4      | 5.41E-04 | -0.8411 | 0.124 | 0.24 | 1 | HC_vs_MS.NoTrt_F |
| UBE2D3      | 5.45E-04 | -0.2788 | 0.717 | 0.82 | 1 | HC_vs_MS.NoTrt_F |
| CNN2        | 5.46E-04 | -0.3001 | 0.986 | 0.98 | 1 | HC_vs_MS.NoTrt_F |
| PAIP1       | 5.52E-04 | -0.2557 | 0.147 | 0.27 | 1 | HC_vs_MS.NoTrt_F |
| IRGQ        | 5.57E-04 | 0.52871 | 0.991 | 0.98 | 1 | HC_vs_MS.NoTrt_F |
| TCEAL4      | 5.58E-04 | -0.8438 | 0.159 | 0.28 | 1 | HC_vs_MS.NoTrt_F |
| ZC3H11A     | 5.60E-04 | -0.7571 | 0.231 | 0.35 | 1 | HC_vs_MS.NoTrt_F |
| TAF4        | 5.61E-04 | -0.4844 | 0.133 | 0.26 | 1 | HC_vs_MS.NoTrt_F |
| AKR1C3      | 5.64E-04 | -1.0339 | 0.035 | 0.11 | 1 | HC_vs_MS.NoTrt_F |
| CTD-2192J10 | 5.65E-04 | 0.5275  | 0.139 | 0.26 | 1 | HC_vs_MS.NoTrt_F |
| PLEKHF2     | 5.65E-04 | -1.159  | 0.101 | 0.2  | 1 | HC_vs_MS.NoTrt_F |
| RTFDC1      | 5.66E-04 | -0.3437 | 0.217 | 0.36 | 1 | HC_vs_MS.NoTrt_F |

|            |          |         |       |      |   |                  |
|------------|----------|---------|-------|------|---|------------------|
| HP1BP3     | 5.66E-04 | -0.3364 | 0.876 | 0.93 | 1 | HC_vs_MS.NoTrt_F |
| NDUFB3     | 5.67E-04 | 0.32817 | 0.199 | 0.34 | 1 | HC_vs_MS.NoTrt_F |
| C2orf47    | 5.68E-04 | -0.6741 | 0.035 | 0.11 | 1 | HC_vs_MS.NoTrt_F |
| PRADC1     | 5.71E-04 | -0.9033 | 0.035 | 0.11 | 1 | HC_vs_MS.NoTrt_F |
| ARL2BP     | 5.75E-04 | -0.3958 | 0.153 | 0.28 | 1 | HC_vs_MS.NoTrt_F |
| CNST       | 5.76E-04 | -0.6857 | 0.303 | 0.46 | 1 | HC_vs_MS.NoTrt_F |
| HSPG2      | 5.77E-04 | 1.60031 | 0.535 | 0.41 | 1 | HC_vs_MS.NoTrt_F |
| ERP44      | 5.79E-04 | -0.3435 | 0.289 | 0.43 | 1 | HC_vs_MS.NoTrt_F |
| CNOT3      | 5.80E-04 | -0.865  | 0.147 | 0.26 | 1 | HC_vs_MS.NoTrt_F |
| CCT4       | 5.82E-04 | -0.4772 | 0.286 | 0.43 | 1 | HC_vs_MS.NoTrt_F |
| BCAP31     | 5.87E-04 | -0.8368 | 0.185 | 0.31 | 1 | HC_vs_MS.NoTrt_F |
| SRA1       | 5.89E-04 | -0.302  | 0.165 | 0.29 | 1 | HC_vs_MS.NoTrt_F |
| PRG4       | 5.94E-04 | -0.5579 | 0.032 | 0.11 | 1 | HC_vs_MS.NoTrt_F |
| RBAK       | 6.02E-04 | -2.0124 | 0.032 | 0.11 | 1 | HC_vs_MS.NoTrt_F |
| PPP1R7     | 6.13E-04 | -0.527  | 0.185 | 0.31 | 1 | HC_vs_MS.NoTrt_F |
| TTL12      | 6.13E-04 | -0.599  | 0.058 | 0.15 | 1 | HC_vs_MS.NoTrt_F |
| RP11-371E8 | 6.20E-04 | -0.316  | 0.035 | 0.11 | 1 | HC_vs_MS.NoTrt_F |
| SNU13      | 6.23E-04 | -0.499  | 0.324 | 0.48 | 1 | HC_vs_MS.NoTrt_F |
| ACTR8      | 6.24E-04 | -0.3866 | 0.081 | 0.18 | 1 | HC_vs_MS.NoTrt_F |
| RTN4IP1    | 6.27E-04 | -0.8848 | 0.035 | 0.11 | 1 | HC_vs_MS.NoTrt_F |
| YIPF2      | 6.35E-04 | -0.5357 | 0.095 | 0.2  | 1 | HC_vs_MS.NoTrt_F |
| MICU2      | 6.36E-04 | -0.2914 | 0.474 | 0.62 | 1 | HC_vs_MS.NoTrt_F |
| U2AF1      | 6.40E-04 | -0.864  | 0.532 | 0.64 | 1 | HC_vs_MS.NoTrt_F |
| HDLBP      | 6.42E-04 | -0.3758 | 0.486 | 0.6  | 1 | HC_vs_MS.NoTrt_F |
| PPM1A      | 6.42E-04 | -0.7289 | 0.179 | 0.31 | 1 | HC_vs_MS.NoTrt_F |
| TCP11L2    | 6.45E-04 | -0.4297 | 0.295 | 0.42 | 1 | HC_vs_MS.NoTrt_F |
| KMT2D      | 6.49E-04 | 1.03393 | 0.87  | 0.86 | 1 | HC_vs_MS.NoTrt_F |
| CLPTM1     | 6.50E-04 | -0.4463 | 0.225 | 0.35 | 1 | HC_vs_MS.NoTrt_F |
| FAM86C1    | 6.52E-04 | -0.7244 | 0.052 | 0.14 | 1 | HC_vs_MS.NoTrt_F |
| FUCA2      | 6.53E-04 | -0.3394 | 0.335 | 0.48 | 1 | HC_vs_MS.NoTrt_F |
| MBD2       | 6.53E-04 | -0.4711 | 0.095 | 0.2  | 1 | HC_vs_MS.NoTrt_F |
| ECH1       | 6.55E-04 | -0.3055 | 0.405 | 0.55 | 1 | HC_vs_MS.NoTrt_F |
| TCEA2      | 6.56E-04 | -0.5026 | 0.032 | 0.11 | 1 | HC_vs_MS.NoTrt_F |
| COPG2      | 6.61E-04 | 0.67173 | 0.092 | 0.2  | 1 | HC_vs_MS.NoTrt_F |
| HS3ST3A1   | 6.61E-04 | -0.306  | 0.084 | 0.19 | 1 | HC_vs_MS.NoTrt_F |
| SPARCL1    | 6.72E-04 | 1.47554 | 0.292 | 0.17 | 1 | HC_vs_MS.NoTrt_F |
| SH3BP5L    | 6.78E-04 | -0.3555 | 0.052 | 0.14 | 1 | HC_vs_MS.NoTrt_F |
| DESI2      | 6.81E-04 | 0.25865 | 0.081 | 0.18 | 1 | HC_vs_MS.NoTrt_F |
| LARP1B     | 6.83E-04 | -1.1848 | 0.075 | 0.17 | 1 | HC_vs_MS.NoTrt_F |
| ZNF511     | 6.83E-04 | -0.6889 | 0.092 | 0.19 | 1 | HC_vs_MS.NoTrt_F |

|            |          |         |       |      |   |                  |
|------------|----------|---------|-------|------|---|------------------|
| EIF4B      | 6.87E-04 | -0.3117 | 0.743 | 0.8  | 1 | HC_vs_MS.NoTrt_F |
| TAGAP      | 6.90E-04 | -0.2737 | 0.353 | 0.52 | 1 | HC_vs_MS.NoTrt_F |
| TAF5L      | 6.95E-04 | -0.8243 | 0.171 | 0.3  | 1 | HC_vs_MS.NoTrt_F |
| LDLRAP1    | 6.96E-04 | -0.2979 | 0.431 | 0.58 | 1 | HC_vs_MS.NoTrt_F |
| PLEKHO2    | 6.98E-04 | -0.5035 | 0.104 | 0.21 | 1 | HC_vs_MS.NoTrt_F |
| JMJD7-PLA2 | 6.99E-04 | -0.5705 | 0.329 | 0.47 | 1 | HC_vs_MS.NoTrt_F |
| ALCAM      | 7.00E-04 | -0.9368 | 0.066 | 0.16 | 1 | HC_vs_MS.NoTrt_F |
| GSPT2      | 7.07E-04 | 0.53433 | 0.052 | 0.14 | 1 | HC_vs_MS.NoTrt_F |
| OLFM2      | 7.16E-04 | -1.3431 | 0.098 | 0.2  | 1 | HC_vs_MS.NoTrt_F |
| LIG1       | 7.17E-04 | -0.5281 | 0.194 | 0.33 | 1 | HC_vs_MS.NoTrt_F |
| ELAVL1     | 7.21E-04 | 0.35753 | 0.983 | 0.97 | 1 | HC_vs_MS.NoTrt_F |
| SURF1      | 7.31E-04 | -0.506  | 0.113 | 0.22 | 1 | HC_vs_MS.NoTrt_F |
| PHLDB1     | 7.34E-04 | 0.74388 | 0.986 | 0.97 | 1 | HC_vs_MS.NoTrt_F |
| LINC00998  | 7.38E-04 | -0.2611 | 0.081 | 0.18 | 1 | HC_vs_MS.NoTrt_F |
| GCA        | 7.39E-04 | -0.8813 | 0.095 | 0.19 | 1 | HC_vs_MS.NoTrt_F |
| ATP2C2     | 7.41E-04 | 0.43502 | 0.032 | 0.11 | 1 | HC_vs_MS.NoTrt_F |
| GPS1       | 7.48E-04 | -0.4691 | 0.162 | 0.28 | 1 | HC_vs_MS.NoTrt_F |
| DUSP22     | 7.48E-04 | -0.5295 | 0.116 | 0.23 | 1 | HC_vs_MS.NoTrt_F |
| MYH9       | 7.57E-04 | -0.313  | 0.829 | 0.95 | 1 | HC_vs_MS.NoTrt_F |
| KAT14      | 7.66E-04 | -0.6248 | 0.072 | 0.17 | 1 | HC_vs_MS.NoTrt_F |
| RNF113A    | 7.70E-04 | -0.6093 | 0.139 | 0.25 | 1 | HC_vs_MS.NoTrt_F |
| PSAT1      | 7.71E-04 | -0.4678 | 0.064 | 0.16 | 1 | HC_vs_MS.NoTrt_F |
| LSP1       | 7.79E-04 | -0.2539 | 0.711 | 0.87 | 1 | HC_vs_MS.NoTrt_F |
| KPNA6      | 7.80E-04 | -0.3828 | 0.592 | 0.72 | 1 | HC_vs_MS.NoTrt_F |
| VAMP7      | 7.81E-04 | -1.0185 | 0.127 | 0.24 | 1 | HC_vs_MS.NoTrt_F |
| SYNJ2BP-CO | 7.93E-04 | -0.3068 | 0.168 | 0.3  | 1 | HC_vs_MS.NoTrt_F |
| VAMP2      | 8.00E-04 | -0.2613 | 0.445 | 0.61 | 1 | HC_vs_MS.NoTrt_F |
| YTHDF1     | 8.04E-04 | -0.2614 | 0.081 | 0.18 | 1 | HC_vs_MS.NoTrt_F |
| AGAP9      | 8.07E-04 | 0.58305 | 0.084 | 0.19 | 1 | HC_vs_MS.NoTrt_F |
| CAV1       | 8.10E-04 | 1.43021 | 0.171 | 0.07 | 1 | HC_vs_MS.NoTrt_F |
| LSM14A     | 8.12E-04 | -0.3188 | 0.523 | 0.66 | 1 | HC_vs_MS.NoTrt_F |
| CUL4A      | 8.19E-04 | -0.4877 | 0.723 | 0.83 | 1 | HC_vs_MS.NoTrt_F |
| MAN1B1     | 8.21E-04 | -0.4992 | 0.329 | 0.48 | 1 | HC_vs_MS.NoTrt_F |
| TLDC2      | 8.27E-04 | 1.17145 | 0.066 | 0.16 | 1 | HC_vs_MS.NoTrt_F |
| FBXO34     | 8.34E-04 | -1.155  | 0.142 | 0.25 | 1 | HC_vs_MS.NoTrt_F |
| GAR1       | 8.35E-04 | -0.8553 | 0.061 | 0.15 | 1 | HC_vs_MS.NoTrt_F |
| FIG4       | 8.39E-04 | -1.2956 | 0.061 | 0.15 | 1 | HC_vs_MS.NoTrt_F |
| FAM118B    | 8.42E-04 | -0.373  | 0.072 | 0.17 | 1 | HC_vs_MS.NoTrt_F |
| SRSF9      | 8.45E-04 | -0.4945 | 0.156 | 0.28 | 1 | HC_vs_MS.NoTrt_F |
| ATG5       | 8.45E-04 | -0.3553 | 0.185 | 0.32 | 1 | HC_vs_MS.NoTrt_F |

|            |          |         |       |      |   |                  |
|------------|----------|---------|-------|------|---|------------------|
| ZFAND2B    | 8.47E-04 | -0.8211 | 0.231 | 0.35 | 1 | HC_vs_MS.NoTrt_F |
| AGGF1      | 8.48E-04 | -0.6565 | 0.165 | 0.29 | 1 | HC_vs_MS.NoTrt_F |
| CEP85      | 8.59E-04 | -0.9338 | 0.139 | 0.25 | 1 | HC_vs_MS.NoTrt_F |
| PLAA       | 8.66E-04 | -0.3041 | 0.133 | 0.25 | 1 | HC_vs_MS.NoTrt_F |
| HTATSF1    | 8.72E-04 | -0.5121 | 0.159 | 0.28 | 1 | HC_vs_MS.NoTrt_F |
| GIMAP8     | 8.81E-04 | -0.7362 | 0.087 | 0.18 | 1 | HC_vs_MS.NoTrt_F |
| TREX1      | 8.89E-04 | 0.30136 | 0.121 | 0.24 | 1 | HC_vs_MS.NoTrt_F |
| EMC7       | 8.92E-04 | -0.3281 | 0.22  | 0.34 | 1 | HC_vs_MS.NoTrt_F |
| ST7        | 8.95E-04 | -0.9224 | 0.084 | 0.18 | 1 | HC_vs_MS.NoTrt_F |
| SIGMAR1    | 9.15E-04 | -0.3444 | 0.202 | 0.33 | 1 | HC_vs_MS.NoTrt_F |
| SORBS2     | 9.18E-04 | 0.49471 | 0.665 | 0.52 | 1 | HC_vs_MS.NoTrt_F |
| STT3A      | 9.18E-04 | -0.9181 | 0.61  | 0.73 | 1 | HC_vs_MS.NoTrt_F |
| ZNF155     | 9.34E-04 | -1.2845 | 0.043 | 0.12 | 1 | HC_vs_MS.NoTrt_F |
| TRIM23     | 9.37E-04 | -0.835  | 0.072 | 0.17 | 1 | HC_vs_MS.NoTrt_F |
| PAFAH1B3   | 9.42E-04 | -0.2587 | 0.11  | 0.22 | 1 | HC_vs_MS.NoTrt_F |
| KPNB1      | 9.45E-04 | -0.4361 | 0.679 | 0.74 | 1 | HC_vs_MS.NoTrt_F |
| PPP1R21    | 9.46E-04 | -0.3421 | 0.275 | 0.41 | 1 | HC_vs_MS.NoTrt_F |
| KLHDC7B    | 9.46E-04 | 0.5899  | 0.046 | 0.13 | 1 | HC_vs_MS.NoTrt_F |
| MRPS2      | 9.49E-04 | -0.5006 | 0.101 | 0.2  | 1 | HC_vs_MS.NoTrt_F |
| RNF5       | 9.57E-04 | -0.4381 | 0.156 | 0.28 | 1 | HC_vs_MS.NoTrt_F |
| BRWD1      | 9.58E-04 | -0.619  | 0.85  | 0.84 | 1 | HC_vs_MS.NoTrt_F |
| TULP3      | 9.58E-04 | -0.35   | 0.046 | 0.13 | 1 | HC_vs_MS.NoTrt_F |
| ARHGAP19-! | 9.59E-04 | -0.7644 | 0.04  | 0.12 | 1 | HC_vs_MS.NoTrt_F |
| PHF1       | 9.60E-04 | 0.29806 | 0.234 | 0.38 | 1 | HC_vs_MS.NoTrt_F |
| ZNF691     | 9.61E-04 | 0.27367 | 0.046 | 0.13 | 1 | HC_vs_MS.NoTrt_F |
| RP4-635E18 | 9.65E-04 | -0.4712 | 0.173 | 0.29 | 1 | HC_vs_MS.NoTrt_F |
| DCTPP1     | 9.74E-04 | -0.9445 | 0.095 | 0.19 | 1 | HC_vs_MS.NoTrt_F |
| PCGF3      | 9.81E-04 | -0.3512 | 0.228 | 0.36 | 1 | HC_vs_MS.NoTrt_F |
| TECPR1     | 9.82E-04 | -0.6252 | 0.509 | 0.6  | 1 | HC_vs_MS.NoTrt_F |
| ATP5I      | 9.83E-04 | 0.29425 | 0.283 | 0.47 | 1 | HC_vs_MS.NoTrt_F |
| CEACAM21   | 9.87E-04 | -0.6549 | 0.275 | 0.39 | 1 | HC_vs_MS.NoTrt_F |
| RP11-529K1 | 0.00101  | -0.3544 | 0.095 | 0.2  | 1 | HC_vs_MS.NoTrt_F |
| ZDHHC5     | 0.00101  | 0.3903  | 0.142 | 0.26 | 1 | HC_vs_MS.NoTrt_F |
| SMIM20     | 0.00102  | -0.2979 | 0.087 | 0.18 | 1 | HC_vs_MS.NoTrt_F |
| TOMM6      | 0.00102  | -0.2594 | 0.24  | 0.38 | 1 | HC_vs_MS.NoTrt_F |
| WRAP53     | 0.00104  | -0.4018 | 0.043 | 0.12 | 1 | HC_vs_MS.NoTrt_F |
| STK17A     | 0.00105  | -0.4074 | 0.289 | 0.44 | 1 | HC_vs_MS.NoTrt_F |
| SLC38A1    | 0.00105  | -0.2934 | 0.783 | 0.87 | 1 | HC_vs_MS.NoTrt_F |
| ANKRD55    | 0.00106  | -0.3799 | 0.182 | 0.3  | 1 | HC_vs_MS.NoTrt_F |
| LAMP1      | 0.00106  | 0.26945 | 0.41  | 0.54 | 1 | HC_vs_MS.NoTrt_F |



|             |         |         |       |      |   |                  |
|-------------|---------|---------|-------|------|---|------------------|
| NIPSNAP3A   | 0.00106 | -0.4879 | 0.069 | 0.16 | 1 | HC_vs_MS.NoTrt_F |
| EIF3E       | 0.00106 | -0.5107 | 0.538 | 0.64 | 1 | HC_vs_MS.NoTrt_F |
| FBXO28      | 0.00107 | -0.6791 | 0.116 | 0.22 | 1 | HC_vs_MS.NoTrt_F |
| C12orf75    | 0.00107 | -0.2958 | 0.176 | 0.3  | 1 | HC_vs_MS.NoTrt_F |
| TMEM41A     | 0.00107 | 0.7468  | 0.858 | 0.79 | 1 | HC_vs_MS.NoTrt_F |
| TOPORS      | 0.00107 | -0.3748 | 0.124 | 0.23 | 1 | HC_vs_MS.NoTrt_F |
| ZBTB33      | 0.00108 | -0.9978 | 0.101 | 0.2  | 1 | HC_vs_MS.NoTrt_F |
| SAV1        | 0.00108 | -0.3556 | 0.329 | 0.48 | 1 | HC_vs_MS.NoTrt_F |
| WAC         | 0.00109 | -0.4515 | 0.448 | 0.59 | 1 | HC_vs_MS.NoTrt_F |
| ASNSD1      | 0.00109 | -0.2751 | 0.165 | 0.29 | 1 | HC_vs_MS.NoTrt_F |
| HSPA9       | 0.00109 | -0.261  | 0.54  | 0.66 | 1 | HC_vs_MS.NoTrt_F |
| C8orf44-SGk | 0.0011  | -0.2788 | 0.101 | 0.2  | 1 | HC_vs_MS.NoTrt_F |
| CELF1       | 0.0011  | -0.6609 | 0.477 | 0.58 | 1 | HC_vs_MS.NoTrt_F |
| RNF145      | 0.00111 | -0.6933 | 0.191 | 0.32 | 1 | HC_vs_MS.NoTrt_F |
| METTL10     | 0.00111 | -0.3656 | 0.324 | 0.46 | 1 | HC_vs_MS.NoTrt_F |
| TAX1BP3     | 0.00112 | -0.5903 | 0.081 | 0.18 | 1 | HC_vs_MS.NoTrt_F |
| TMPRSS4-A5  | 0.00113 | -0.3901 | 0.069 | 0.16 | 1 | HC_vs_MS.NoTrt_F |
| ZNF606      | 0.00113 | 0.42577 | 0.815 | 0.78 | 1 | HC_vs_MS.NoTrt_F |
| PDGFRB      | 0.00113 | 2.36476 | 0.116 | 0.03 | 1 | HC_vs_MS.NoTrt_F |
| RBM14-RBM   | 0.00114 | -0.7545 | 0.139 | 0.25 | 1 | HC_vs_MS.NoTrt_F |
| PPP4C       | 0.00114 | -0.3115 | 0.431 | 0.56 | 1 | HC_vs_MS.NoTrt_F |
| SPP2        | 0.00114 | 0.40905 | 0.809 | 0.75 | 1 | HC_vs_MS.NoTrt_F |
| NDUFA8      | 0.00114 | -0.3842 | 0.116 | 0.22 | 1 | HC_vs_MS.NoTrt_F |
| FNDC3B      | 0.00115 | 1.07545 | 0.783 | 0.65 | 1 | HC_vs_MS.NoTrt_F |
| GNG10       | 0.00115 | -0.3016 | 0.136 | 0.25 | 1 | HC_vs_MS.NoTrt_F |
| MRPS14      | 0.00115 | -0.2856 | 0.176 | 0.3  | 1 | HC_vs_MS.NoTrt_F |
| MYC         | 0.00115 | -0.8075 | 0.168 | 0.29 | 1 | HC_vs_MS.NoTrt_F |
| OGFOD2      | 0.00115 | -0.5283 | 0.121 | 0.23 | 1 | HC_vs_MS.NoTrt_F |
| SBDS        | 0.00119 | -0.4082 | 0.309 | 0.45 | 1 | HC_vs_MS.NoTrt_F |
| RAB4B       | 0.00119 | -0.485  | 0.384 | 0.5  | 1 | HC_vs_MS.NoTrt_F |
| LDOC1L      | 0.00119 | -1.374  | 0.055 | 0.14 | 1 | HC_vs_MS.NoTrt_F |
| PRR7        | 0.00121 | 0.46611 | 0.043 | 0.12 | 1 | HC_vs_MS.NoTrt_F |
| FUNDC1      | 0.00121 | -0.4314 | 0.055 | 0.14 | 1 | HC_vs_MS.NoTrt_F |
| BTBD10      | 0.00121 | -0.4422 | 0.159 | 0.28 | 1 | HC_vs_MS.NoTrt_F |
| ZNF24       | 0.00123 | -0.3331 | 0.199 | 0.33 | 1 | HC_vs_MS.NoTrt_F |
| DUSP16      | 0.00123 | -0.4929 | 0.329 | 0.46 | 1 | HC_vs_MS.NoTrt_F |
| TIMM22      | 0.00124 | -0.6631 | 0.107 | 0.2  | 1 | HC_vs_MS.NoTrt_F |
| MKRN1       | 0.00124 | -0.8853 | 0.853 | 0.9  | 1 | HC_vs_MS.NoTrt_F |
| MYADM       | 0.00125 | 0.93733 | 0.867 | 0.81 | 1 | HC_vs_MS.NoTrt_F |
| LAPTM5      | 0.00125 | -0.3272 | 0.639 | 0.76 | 1 | HC_vs_MS.NoTrt_F |

|            |         |         |       |      |   |                  |
|------------|---------|---------|-------|------|---|------------------|
| PPP1R11    | 0.00125 | -0.4144 | 0.211 | 0.34 | 1 | HC_vs_MS.NoTrt_F |
| SACM1L     | 0.00125 | -0.5218 | 0.309 | 0.43 | 1 | HC_vs_MS.NoTrt_F |
| RP11-411B6 | 0.00126 | 0.40937 | 0.26  | 0.4  | 1 | HC_vs_MS.NoTrt_F |
| ZMYND11    | 0.00126 | -0.6933 | 0.13  | 0.24 | 1 | HC_vs_MS.NoTrt_F |
| APH1A      | 0.00126 | -0.4996 | 0.202 | 0.33 | 1 | HC_vs_MS.NoTrt_F |
| MTCH2      | 0.00126 | -0.3493 | 0.124 | 0.23 | 1 | HC_vs_MS.NoTrt_F |
| PNMA1      | 0.00126 | -0.8746 | 0.09  | 0.18 | 1 | HC_vs_MS.NoTrt_F |
| SLC7A1     | 0.00127 | -1.091  | 0.098 | 0.19 | 1 | HC_vs_MS.NoTrt_F |
| SMG8       | 0.00127 | -0.642  | 0.107 | 0.21 | 1 | HC_vs_MS.NoTrt_F |
| CNIH1      | 0.00128 | -0.4123 | 0.145 | 0.25 | 1 | HC_vs_MS.NoTrt_F |
| OTUD6B     | 0.00129 | -0.4833 | 0.084 | 0.18 | 1 | HC_vs_MS.NoTrt_F |
| KIAA1217   | 0.00129 | 1.41983 | 0.165 | 0.07 | 1 | HC_vs_MS.NoTrt_F |
| CDKN2AIP   | 0.00131 | -0.4958 | 0.133 | 0.24 | 1 | HC_vs_MS.NoTrt_F |
| TRAPPC6B   | 0.00133 | -0.5092 | 0.477 | 0.59 | 1 | HC_vs_MS.NoTrt_F |
| TMX2       | 0.00133 | -0.3095 | 0.165 | 0.28 | 1 | HC_vs_MS.NoTrt_F |
| MCUB       | 0.00134 | -0.2638 | 0.306 | 0.45 | 1 | HC_vs_MS.NoTrt_F |
| TBC1D8B    | 0.00134 | 0.42382 | 0.965 | 0.96 | 1 | HC_vs_MS.NoTrt_F |
| RPP14      | 0.00134 | 0.54493 | 0.951 | 0.93 | 1 | HC_vs_MS.NoTrt_F |
| DEF6       | 0.00135 | -0.2639 | 0.428 | 0.61 | 1 | HC_vs_MS.NoTrt_F |
| PLPP6      | 0.00135 | -0.2672 | 0.061 | 0.14 | 1 | HC_vs_MS.NoTrt_F |
| ADIPOR2    | 0.00135 | -0.3947 | 0.159 | 0.27 | 1 | HC_vs_MS.NoTrt_F |
| ATXN7L2    | 0.00136 | 0.29835 | 0.055 | 0.14 | 1 | HC_vs_MS.NoTrt_F |
| ICA1       | 0.00137 | 1.05645 | 0.676 | 0.56 | 1 | HC_vs_MS.NoTrt_F |
| ABHD4      | 0.00137 | 0.31812 | 0.069 | 0.16 | 1 | HC_vs_MS.NoTrt_F |
| FLT1       | 0.00138 | 0.45124 | 0.777 | 0.59 | 1 | HC_vs_MS.NoTrt_F |
| CCNT2      | 0.00138 | -0.3926 | 0.179 | 0.3  | 1 | HC_vs_MS.NoTrt_F |
| TRIM73     | 0.00138 | 0.35903 | 0.913 | 0.91 | 1 | HC_vs_MS.NoTrt_F |
| SYCP2      | 0.00138 | -0.9225 | 0.049 | 0.13 | 1 | HC_vs_MS.NoTrt_F |
| KLRD1      | 0.00139 | 0.43583 | 0.98  | 0.98 | 1 | HC_vs_MS.NoTrt_F |
| ERP29      | 0.0014  | -0.2932 | 0.858 | 0.91 | 1 | HC_vs_MS.NoTrt_F |
| ZFPL1      | 0.0014  | 0.9644  | 0.069 | 0.16 | 1 | HC_vs_MS.NoTrt_F |
| FAM8A1     | 0.0014  | 0.62529 | 0.058 | 0.14 | 1 | HC_vs_MS.NoTrt_F |
| XPO4       | 0.0014  | -0.7589 | 0.147 | 0.26 | 1 | HC_vs_MS.NoTrt_F |
| GRPEL2     | 0.00141 | -0.3427 | 0.275 | 0.4  | 1 | HC_vs_MS.NoTrt_F |
| OVCA2      | 0.00142 | -0.4097 | 0.101 | 0.2  | 1 | HC_vs_MS.NoTrt_F |
| CRNKL1     | 0.00142 | -0.3473 | 0.116 | 0.22 | 1 | HC_vs_MS.NoTrt_F |
| EPM2AIP1   | 0.00142 | -0.3723 | 0.309 | 0.42 | 1 | HC_vs_MS.NoTrt_F |
| COL4A2     | 0.00143 | 1.32199 | 0.121 | 0.04 | 1 | HC_vs_MS.NoTrt_F |
| TRPC4AP    | 0.00143 | -0.4008 | 0.329 | 0.46 | 1 | HC_vs_MS.NoTrt_F |
| ALG6       | 0.00143 | -0.3821 | 0.147 | 0.26 | 1 | HC_vs_MS.NoTrt_F |

|            |         |         |       |      |   |                  |
|------------|---------|---------|-------|------|---|------------------|
| CTU2       | 0.00144 | -0.399  | 0.052 | 0.13 | 1 | HC_vs_MS.NoTrt_F |
| ARHGAP26   | 0.00145 | 0.72708 | 0.777 | 0.68 | 1 | HC_vs_MS.NoTrt_F |
| CCDC122    | 0.00145 | 0.31096 | 0.936 | 0.94 | 1 | HC_vs_MS.NoTrt_F |
| FAM156B    | 0.00145 | 0.35543 | 0.095 | 0.19 | 1 | HC_vs_MS.NoTrt_F |
| RP11-507K1 | 0.00146 | 1.04662 | 0.052 | 0.13 | 1 | HC_vs_MS.NoTrt_F |
| RRM1       | 0.00147 | -0.2608 | 0.387 | 0.55 | 1 | HC_vs_MS.NoTrt_F |
| TRIM62     | 0.00147 | 0.4877  | 0.078 | 0.17 | 1 | HC_vs_MS.NoTrt_F |
| ZMYM6      | 0.00147 | 0.5027  | 0.884 | 0.79 | 1 | HC_vs_MS.NoTrt_F |
| TCF12      | 0.00148 | -0.79   | 0.306 | 0.43 | 1 | HC_vs_MS.NoTrt_F |
| FDXR       | 0.00148 | -0.3215 | 0.09  | 0.18 | 1 | HC_vs_MS.NoTrt_F |
| ZNF507     | 0.00148 | -0.4791 | 0.197 | 0.32 | 1 | HC_vs_MS.NoTrt_F |
| L3MBTL3    | 0.00148 | -0.3399 | 0.118 | 0.22 | 1 | HC_vs_MS.NoTrt_F |
| RUNDC1     | 0.00149 | 0.51879 | 0.775 | 0.71 | 1 | HC_vs_MS.NoTrt_F |
| ARMC7      | 0.00149 | -1.0262 | 0.09  | 0.18 | 1 | HC_vs_MS.NoTrt_F |
| TANGO2     | 0.0015  | 0.6264  | 0.887 | 0.87 | 1 | HC_vs_MS.NoTrt_F |
| PFKL       | 0.00151 | -0.6061 | 0.76  | 0.79 | 1 | HC_vs_MS.NoTrt_F |
| DNPH1      | 0.00151 | 0.32714 | 0.185 | 0.32 | 1 | HC_vs_MS.NoTrt_F |
| ZDHHC7     | 0.00152 | -0.3008 | 0.194 | 0.31 | 1 | HC_vs_MS.NoTrt_F |
| EIF3CL     | 0.00154 | -0.4805 | 0.191 | 0.32 | 1 | HC_vs_MS.NoTrt_F |
| PEPD       | 0.00154 | -0.2617 | 0.176 | 0.3  | 1 | HC_vs_MS.NoTrt_F |
| SFT2D2     | 0.00154 | 0.40661 | 0.991 | 0.98 | 1 | HC_vs_MS.NoTrt_F |
| AC138517.6 | 0.00154 | -0.9524 | 0.107 | 0.22 | 1 | HC_vs_MS.NoTrt_F |
| CHCHD1     | 0.00155 | -0.3503 | 0.116 | 0.22 | 1 | HC_vs_MS.NoTrt_F |
| POLR3D     | 0.00156 | 0.6122  | 0.445 | 0.58 | 1 | HC_vs_MS.NoTrt_F |
| LTBR       | 0.00156 | 0.2655  | 0.951 | 0.93 | 1 | HC_vs_MS.NoTrt_F |
| ATP5J2     | 0.00157 | 0.59534 | 0.353 | 0.53 | 1 | HC_vs_MS.NoTrt_F |
| ZNF407     | 0.00157 | -0.4554 | 0.124 | 0.23 | 1 | HC_vs_MS.NoTrt_F |
| RRAGA      | 0.00157 | -0.7904 | 0.185 | 0.29 | 1 | HC_vs_MS.NoTrt_F |
| DUSP10     | 0.00157 | 0.44178 | 0.335 | 0.49 | 1 | HC_vs_MS.NoTrt_F |
| C5orf63    | 0.00158 | -0.5009 | 0.393 | 0.51 | 1 | HC_vs_MS.NoTrt_F |
| CRY1       | 0.00158 | -0.4483 | 0.208 | 0.34 | 1 | HC_vs_MS.NoTrt_F |
| PCBD1      | 0.00158 | -0.7758 | 0.104 | 0.2  | 1 | HC_vs_MS.NoTrt_F |
| SPDYE6     | 0.0016  | 0.4902  | 0.145 | 0.26 | 1 | HC_vs_MS.NoTrt_F |
| TFE3       | 0.00161 | -0.2659 | 0.11  | 0.21 | 1 | HC_vs_MS.NoTrt_F |
| POLR2C     | 0.00161 | -0.5464 | 0.569 | 0.68 | 1 | HC_vs_MS.NoTrt_F |
| IDUA       | 0.00161 | -0.3604 | 0.107 | 0.21 | 1 | HC_vs_MS.NoTrt_F |
| TMEM30A    | 0.00161 | -0.7426 | 0.208 | 0.33 | 1 | HC_vs_MS.NoTrt_F |
| GNL3       | 0.00161 | -0.382  | 0.162 | 0.27 | 1 | HC_vs_MS.NoTrt_F |
| SQRDL      | 0.00162 | -0.3467 | 0.171 | 0.29 | 1 | HC_vs_MS.NoTrt_F |
| ZNF253     | 0.00163 | 0.48291 | 0.754 | 0.59 | 1 | HC_vs_MS.NoTrt_F |

|          |         |         |       |      |   |                  |
|----------|---------|---------|-------|------|---|------------------|
| MED21    | 0.00163 | -0.6817 | 0.156 | 0.27 | 1 | HC_vs_MS.NoTrt_F |
| PYGL     | 0.00165 | 0.41229 | 0.884 | 0.87 | 1 | HC_vs_MS.NoTrt_F |
| TTC14    | 0.00165 | -0.3712 | 0.442 | 0.54 | 1 | HC_vs_MS.NoTrt_F |
| DLAT     | 0.00165 | 0.38505 | 0.075 | 0.17 | 1 | HC_vs_MS.NoTrt_F |
| INSL3    | 0.00166 | 0.27662 | 0.043 | 0.12 | 1 | HC_vs_MS.NoTrt_F |
| RNF219   | 0.00166 | -0.5598 | 0.072 | 0.16 | 1 | HC_vs_MS.NoTrt_F |
| PHF5A    | 0.00166 | -0.4285 | 0.133 | 0.24 | 1 | HC_vs_MS.NoTrt_F |
| ARIH1    | 0.00166 | 0.31074 | 0.974 | 0.97 | 1 | HC_vs_MS.NoTrt_F |
| CRYZ     | 0.00167 | -0.604  | 0.133 | 0.23 | 1 | HC_vs_MS.NoTrt_F |
| TOMM5    | 0.00168 | -0.2815 | 0.194 | 0.32 | 1 | HC_vs_MS.NoTrt_F |
| AIDA     | 0.00168 | -0.7686 | 0.139 | 0.24 | 1 | HC_vs_MS.NoTrt_F |
| ABL1     | 0.00168 | 0.46946 | 0.075 | 0.17 | 1 | HC_vs_MS.NoTrt_F |
| MT-ND6   | 0.0017  | 0.80574 | 0.777 | 0.8  | 1 | HC_vs_MS.NoTrt_F |
| MAP3K4   | 0.0017  | -0.606  | 0.202 | 0.33 | 1 | HC_vs_MS.NoTrt_F |
| CAD      | 0.0017  | 1.51577 | 0.777 | 0.7  | 1 | HC_vs_MS.NoTrt_F |
| NLGN3    | 0.00171 | -0.6354 | 0.064 | 0.15 | 1 | HC_vs_MS.NoTrt_F |
| INF2     | 0.00171 | -0.4941 | 0.249 | 0.38 | 1 | HC_vs_MS.NoTrt_F |
| LPCAT1   | 0.00173 | -0.3309 | 0.064 | 0.15 | 1 | HC_vs_MS.NoTrt_F |
| C10orf88 | 0.00173 | -0.3177 | 0.191 | 0.31 | 1 | HC_vs_MS.NoTrt_F |
| DOK1     | 0.00173 | -0.3757 | 0.107 | 0.2  | 1 | HC_vs_MS.NoTrt_F |
| SNRPE    | 0.00175 | 0.39204 | 0.159 | 0.28 | 1 | HC_vs_MS.NoTrt_F |
| CRTC1    | 0.00175 | 0.41209 | 0.217 | 0.35 | 1 | HC_vs_MS.NoTrt_F |
| DGCR8    | 0.00175 | -0.3795 | 0.136 | 0.25 | 1 | HC_vs_MS.NoTrt_F |
| ZNF44    | 0.00175 | 0.58264 | 0.54  | 0.69 | 1 | HC_vs_MS.NoTrt_F |
| STMN3    | 0.00176 | 0.57137 | 0.249 | 0.39 | 1 | HC_vs_MS.NoTrt_F |
| RNF185   | 0.00176 | -0.5712 | 0.306 | 0.42 | 1 | HC_vs_MS.NoTrt_F |
| QARS     | 0.00176 | -0.6036 | 0.246 | 0.36 | 1 | HC_vs_MS.NoTrt_F |
| CLASRP   | 0.00177 | -0.5301 | 0.202 | 0.32 | 1 | HC_vs_MS.NoTrt_F |
| CDCP1    | 0.00177 | 0.6214  | 0.561 | 0.41 | 1 | HC_vs_MS.NoTrt_F |
| BEX2     | 0.00177 | -0.3204 | 0.092 | 0.19 | 1 | HC_vs_MS.NoTrt_F |
| HNRNPU   | 0.00178 | -0.3831 | 0.506 | 0.61 | 1 | HC_vs_MS.NoTrt_F |
| TNIP1    | 0.00178 | 0.48718 | 0.355 | 0.52 | 1 | HC_vs_MS.NoTrt_F |
| IL15RA   | 0.00178 | -0.3788 | 0.127 | 0.23 | 1 | HC_vs_MS.NoTrt_F |
| SMAD5    | 0.00179 | 0.67386 | 0.566 | 0.45 | 1 | HC_vs_MS.NoTrt_F |
| COPS3    | 0.0018  | -0.5743 | 0.286 | 0.41 | 1 | HC_vs_MS.NoTrt_F |
| ATG16L1  | 0.00181 | -0.7547 | 0.179 | 0.29 | 1 | HC_vs_MS.NoTrt_F |
| TMEM177  | 0.00183 | -1.5554 | 0.043 | 0.12 | 1 | HC_vs_MS.NoTrt_F |
| USMG5    | 0.00183 | 0.25431 | 0.266 | 0.43 | 1 | HC_vs_MS.NoTrt_F |
| ASB13    | 0.00184 | -1.6621 | 0.107 | 0.21 | 1 | HC_vs_MS.NoTrt_F |
| RAD17    | 0.00185 | -0.5987 | 0.471 | 0.6  | 1 | HC_vs_MS.NoTrt_F |

|            |         |         |       |      |   |                  |
|------------|---------|---------|-------|------|---|------------------|
| PCDHA4     | 0.00186 | 0.34639 | 0.957 | 0.91 | 1 | HC_vs_MS.NoTrt_F |
| CKAP2      | 0.00186 | -0.2861 | 0.147 | 0.26 | 1 | HC_vs_MS.NoTrt_F |
| LUC7L2     | 0.00186 | -0.3402 | 0.584 | 0.69 | 1 | HC_vs_MS.NoTrt_F |
| CIAO1      | 0.00187 | -0.2843 | 0.355 | 0.48 | 1 | HC_vs_MS.NoTrt_F |
| GEMIN6     | 0.00188 | 0.25176 | 0.968 | 0.93 | 1 | HC_vs_MS.NoTrt_F |
| KRBA1      | 0.00188 | -0.2503 | 0.043 | 0.12 | 1 | HC_vs_MS.NoTrt_F |
| KIAA1456   | 0.00188 | 0.33799 | 0.962 | 0.93 | 1 | HC_vs_MS.NoTrt_F |
| ZNF317     | 0.00188 | -0.4734 | 0.139 | 0.25 | 1 | HC_vs_MS.NoTrt_F |
| TRAF2      | 0.00189 | -0.7405 | 0.214 | 0.33 | 1 | HC_vs_MS.NoTrt_F |
| SNAPC4     | 0.0019  | -0.6884 | 0.058 | 0.14 | 1 | HC_vs_MS.NoTrt_F |
| NSMAF      | 0.00191 | -0.3531 | 0.263 | 0.39 | 1 | HC_vs_MS.NoTrt_F |
| CLINT1     | 0.00191 | -0.3168 | 0.679 | 0.77 | 1 | HC_vs_MS.NoTrt_F |
| LAIR2      | 0.00191 | 0.28694 | 0.179 | 0.31 | 1 | HC_vs_MS.NoTrt_F |
| ESR2       | 0.00191 | 0.39359 | 0.555 | 0.7  | 1 | HC_vs_MS.NoTrt_F |
| NFKBIA     | 0.00192 | 1.43023 | 0.468 | 0.38 | 1 | HC_vs_MS.NoTrt_F |
| ATG4A      | 0.00196 | 0.35454 | 0.075 | 0.17 | 1 | HC_vs_MS.NoTrt_F |
| CPQ        | 0.00196 | -0.7827 | 0.37  | 0.5  | 1 | HC_vs_MS.NoTrt_F |
| VWF        | 0.00197 | 1.8118  | 0.237 | 0.13 | 1 | HC_vs_MS.NoTrt_F |
| LMF2       | 0.00198 | 0.28135 | 0.303 | 0.47 | 1 | HC_vs_MS.NoTrt_F |
| ARNTL      | 0.00199 | 0.29911 | 0.251 | 0.39 | 1 | HC_vs_MS.NoTrt_F |
| CEP85L     | 0.002   | -0.2737 | 0.292 | 0.41 | 1 | HC_vs_MS.NoTrt_F |
| HIBCH      | 0.00201 | -0.2654 | 0.26  | 0.4  | 1 | HC_vs_MS.NoTrt_F |
| STAT5A     | 0.00203 | -0.7132 | 0.211 | 0.33 | 1 | HC_vs_MS.NoTrt_F |
| THOP1      | 0.00205 | 0.26918 | 0.402 | 0.54 | 1 | HC_vs_MS.NoTrt_F |
| CDH5       | 0.00207 | 0.98698 | 0.101 | 0.03 | 1 | HC_vs_MS.NoTrt_F |
| TRIM28     | 0.00208 | -0.6471 | 0.113 | 0.21 | 1 | HC_vs_MS.NoTrt_F |
| PPP1R13L   | 0.00208 | 0.2734  | 0.858 | 0.77 | 1 | HC_vs_MS.NoTrt_F |
| CDC16      | 0.00208 | 0.36095 | 0.159 | 0.27 | 1 | HC_vs_MS.NoTrt_F |
| MEGF11     | 0.00209 | -0.6474 | 0.043 | 0.12 | 1 | HC_vs_MS.NoTrt_F |
| ZNF322     | 0.00209 | 0.62407 | 0.043 | 0.12 | 1 | HC_vs_MS.NoTrt_F |
| GMIP       | 0.0021  | -0.901  | 0.263 | 0.39 | 1 | HC_vs_MS.NoTrt_F |
| UBA3       | 0.00211 | -0.5167 | 0.416 | 0.54 | 1 | HC_vs_MS.NoTrt_F |
| RRS1       | 0.00213 | -0.5401 | 0.11  | 0.21 | 1 | HC_vs_MS.NoTrt_F |
| RP11-234B2 | 0.00213 | -0.3423 | 0.04  | 0.11 | 1 | HC_vs_MS.NoTrt_F |
| DCTD       | 0.00213 | -0.308  | 0.153 | 0.26 | 1 | HC_vs_MS.NoTrt_F |
| ZBED6      | 0.00216 | -0.7615 | 0.058 | 0.14 | 1 | HC_vs_MS.NoTrt_F |
| C5orf58    | 0.00217 | -0.3098 | 0.04  | 0.11 | 1 | HC_vs_MS.NoTrt_F |
| SNAPIN     | 0.00217 | 0.25541 | 0.147 | 0.26 | 1 | HC_vs_MS.NoTrt_F |
| FLII       | 0.00218 | -0.3112 | 0.249 | 0.37 | 1 | HC_vs_MS.NoTrt_F |
| TMEM214    | 0.00219 | -0.5412 | 0.095 | 0.19 | 1 | HC_vs_MS.NoTrt_F |

|          |         |         |       |      |   |                  |
|----------|---------|---------|-------|------|---|------------------|
| VWA9     | 0.00221 | -1.3022 | 0.09  | 0.18 | 1 | HC_vs_MS.NoTrt_F |
| QDPR     | 0.00222 | -0.3158 | 0.075 | 0.16 | 1 | HC_vs_MS.NoTrt_F |
| INPP1    | 0.00223 | 0.87257 | 0.058 | 0.14 | 1 | HC_vs_MS.NoTrt_F |
| KAT6B    | 0.00224 | 0.59892 | 0.136 | 0.24 | 1 | HC_vs_MS.NoTrt_F |
| PLCXD2   | 0.00224 | -0.2724 | 0.081 | 0.17 | 1 | HC_vs_MS.NoTrt_F |
| LDOC1    | 0.00225 | -0.3238 | 0.078 | 0.17 | 1 | HC_vs_MS.NoTrt_F |
| RDX      | 0.00225 | -0.6274 | 0.286 | 0.41 | 1 | HC_vs_MS.NoTrt_F |
| EDEM3    | 0.00226 | -0.3813 | 0.309 | 0.43 | 1 | HC_vs_MS.NoTrt_F |
| UCHL3    | 0.00226 | -0.2738 | 0.159 | 0.27 | 1 | HC_vs_MS.NoTrt_F |
| XAB2     | 0.00227 | 0.30888 | 0.24  | 0.37 | 1 | HC_vs_MS.NoTrt_F |
| DAPK3    | 0.00228 | -0.738  | 0.116 | 0.21 | 1 | HC_vs_MS.NoTrt_F |
| DDRKG1   | 0.00229 | -0.5559 | 0.173 | 0.28 | 1 | HC_vs_MS.NoTrt_F |
| L3HYPDH  | 0.00232 | -0.7545 | 0.208 | 0.32 | 1 | HC_vs_MS.NoTrt_F |
| NMNAT1   | 0.00232 | 0.41129 | 0.986 | 1    | 1 | HC_vs_MS.NoTrt_F |
| SAAL1    | 0.00232 | -0.5952 | 0.09  | 0.18 | 1 | HC_vs_MS.NoTrt_F |
| IL17RB   | 0.00233 | -0.2785 | 0.04  | 0.11 | 1 | HC_vs_MS.NoTrt_F |
| SLC9B2   | 0.00234 | 0.48797 | 0.066 | 0.15 | 1 | HC_vs_MS.NoTrt_F |
| STIM2    | 0.00235 | -0.3329 | 0.191 | 0.3  | 1 | HC_vs_MS.NoTrt_F |
| PYM1     | 0.00237 | -0.5118 | 0.231 | 0.35 | 1 | HC_vs_MS.NoTrt_F |
| KATNA1   | 0.00237 | -0.4103 | 0.113 | 0.21 | 1 | HC_vs_MS.NoTrt_F |
| HIVEP3   | 0.00238 | -0.4374 | 0.092 | 0.18 | 1 | HC_vs_MS.NoTrt_F |
| CASP3    | 0.00238 | -0.3852 | 0.173 | 0.29 | 1 | HC_vs_MS.NoTrt_F |
| YY1AP1   | 0.00238 | -0.3005 | 0.543 | 0.65 | 1 | HC_vs_MS.NoTrt_F |
| EIF4EBP1 | 0.00239 | 0.29833 | 0.055 | 0.13 | 1 | HC_vs_MS.NoTrt_F |
| SAT1     | 0.00239 | -0.3902 | 0.595 | 0.76 | 1 | HC_vs_MS.NoTrt_F |
| CNDP2    | 0.00242 | -0.5656 | 0.749 | 0.8  | 1 | HC_vs_MS.NoTrt_F |
| INTS5    | 0.00243 | -0.3974 | 0.09  | 0.18 | 1 | HC_vs_MS.NoTrt_F |
| HIST3H2A | 0.00245 | 0.32622 | 0.069 | 0.16 | 1 | HC_vs_MS.NoTrt_F |
| B4GALT7  | 0.00245 | 0.62128 | 0.078 | 0.17 | 1 | HC_vs_MS.NoTrt_F |
| PKIG     | 0.00245 | 0.52398 | 0.685 | 0.71 | 1 | HC_vs_MS.NoTrt_F |
| ADAM8    | 0.00245 | 0.26391 | 0.205 | 0.34 | 1 | HC_vs_MS.NoTrt_F |
| SERBP1   | 0.00246 | -0.3555 | 0.642 | 0.74 | 1 | HC_vs_MS.NoTrt_F |
| NSMCE1   | 0.00248 | -0.4381 | 0.665 | 0.74 | 1 | HC_vs_MS.NoTrt_F |
| KAT5     | 0.00248 | -0.4302 | 0.191 | 0.3  | 1 | HC_vs_MS.NoTrt_F |
| HSPA4    | 0.0025  | -0.3488 | 0.434 | 0.53 | 1 | HC_vs_MS.NoTrt_F |
| BNIP1    | 0.00251 | -0.4869 | 0.087 | 0.18 | 1 | HC_vs_MS.NoTrt_F |
| TROVE2   | 0.00254 | -0.3526 | 0.717 | 0.78 | 1 | HC_vs_MS.NoTrt_F |
| UBE2E1   | 0.00254 | -0.388  | 0.11  | 0.2  | 1 | HC_vs_MS.NoTrt_F |
| HPCAL1   | 0.00254 | -0.3578 | 0.361 | 0.47 | 1 | HC_vs_MS.NoTrt_F |
| SRI      | 0.00254 | -0.4467 | 0.471 | 0.59 | 1 | HC_vs_MS.NoTrt_F |

|            |         |         |       |      |   |                  |
|------------|---------|---------|-------|------|---|------------------|
| GOLT1B     | 0.00255 | -0.2705 | 0.139 | 0.24 | 1 | HC_vs_MS.NoTrt_F |
| DUSP28     | 0.00255 | -0.3015 | 0.754 | 0.83 | 1 | HC_vs_MS.NoTrt_F |
| RBM12B     | 0.00256 | -0.3932 | 0.165 | 0.28 | 1 | HC_vs_MS.NoTrt_F |
| C20orf24   | 0.00256 | -0.255  | 0.153 | 0.26 | 1 | HC_vs_MS.NoTrt_F |
| SUPT7L     | 0.00258 | -0.4078 | 0.468 | 0.59 | 1 | HC_vs_MS.NoTrt_F |
| PJA1       | 0.00259 | -0.7379 | 0.075 | 0.16 | 1 | HC_vs_MS.NoTrt_F |
| RP11-286N2 | 0.00259 | 0.34571 | 0.977 | 0.97 | 1 | HC_vs_MS.NoTrt_F |
| C14orf159  | 0.0026  | 0.46359 | 0.592 | 0.75 | 1 | HC_vs_MS.NoTrt_F |
| CKAP5      | 0.0026  | -0.3594 | 0.168 | 0.29 | 1 | HC_vs_MS.NoTrt_F |
| UTP4       | 0.0026  | -0.5388 | 0.838 | 0.88 | 1 | HC_vs_MS.NoTrt_F |
| BPGM       | 0.00261 | 0.50953 | 0.066 | 0.15 | 1 | HC_vs_MS.NoTrt_F |
| UCK2       | 0.00266 | 0.37392 | 0.09  | 0.18 | 1 | HC_vs_MS.NoTrt_F |
| HIST2H4A   | 0.00266 | -0.3017 | 0.09  | 0.18 | 1 | HC_vs_MS.NoTrt_F |
| PPIH       | 0.00267 | -0.5319 | 0.098 | 0.19 | 1 | HC_vs_MS.NoTrt_F |
| PSD        | 0.00267 | -0.4491 | 0.098 | 0.19 | 1 | HC_vs_MS.NoTrt_F |
| TOMM22     | 0.00268 | -0.5723 | 0.214 | 0.33 | 1 | HC_vs_MS.NoTrt_F |
| GYS1       | 0.00269 | -0.2535 | 0.165 | 0.28 | 1 | HC_vs_MS.NoTrt_F |
| SCYL1      | 0.0027  | -0.4421 | 0.269 | 0.39 | 1 | HC_vs_MS.NoTrt_F |
| C4orf32    | 0.0027  | 0.28969 | 0.994 | 0.99 | 1 | HC_vs_MS.NoTrt_F |
| LGALS3BP   | 0.00276 | 1.02146 | 0.711 | 0.6  | 1 | HC_vs_MS.NoTrt_F |
| LPP        | 0.00276 | 0.40404 | 0.988 | 0.96 | 1 | HC_vs_MS.NoTrt_F |
| FLCN       | 0.00277 | 0.54639 | 0.893 | 0.82 | 1 | HC_vs_MS.NoTrt_F |
| CLUL1      | 0.00277 | -0.3846 | 0.075 | 0.16 | 1 | HC_vs_MS.NoTrt_F |
| PRKG2      | 0.00279 | -0.3058 | 0.387 | 0.54 | 1 | HC_vs_MS.NoTrt_F |
| BFSP2      | 0.0028  | 0.67564 | 0.052 | 0.13 | 1 | HC_vs_MS.NoTrt_F |
| CTRL       | 0.00281 | -1.1229 | 0.133 | 0.23 | 1 | HC_vs_MS.NoTrt_F |
| SLC2A6     | 0.00281 | 0.48871 | 0.254 | 0.38 | 1 | HC_vs_MS.NoTrt_F |
| ARF4       | 0.00283 | -0.6144 | 0.182 | 0.29 | 1 | HC_vs_MS.NoTrt_F |
| HOOK1      | 0.00283 | -0.3954 | 0.078 | 0.17 | 1 | HC_vs_MS.NoTrt_F |
| SNRPA      | 0.00283 | -0.2728 | 0.298 | 0.41 | 1 | HC_vs_MS.NoTrt_F |
| LENG8      | 0.00284 | 0.78656 | 0.777 | 0.77 | 1 | HC_vs_MS.NoTrt_F |
| MRPL33     | 0.00286 | 0.28735 | 0.214 | 0.34 | 1 | HC_vs_MS.NoTrt_F |
| RSPH3      | 0.00287 | 0.29499 | 0.829 | 0.82 | 1 | HC_vs_MS.NoTrt_F |
| DIRAS2     | 0.00288 | 0.38849 | 0.873 | 0.83 | 1 | HC_vs_MS.NoTrt_F |
| CCDC71     | 0.00289 | 0.50207 | 0.072 | 0.16 | 1 | HC_vs_MS.NoTrt_F |
| CSTF2      | 0.00289 | -0.642  | 0.095 | 0.18 | 1 | HC_vs_MS.NoTrt_F |
| THAP2      | 0.0029  | -0.5341 | 0.107 | 0.2  | 1 | HC_vs_MS.NoTrt_F |
| DNAJB12    | 0.0029  | -0.4493 | 0.15  | 0.25 | 1 | HC_vs_MS.NoTrt_F |
| ALDH3A2    | 0.0029  | 0.2536  | 0.295 | 0.41 | 1 | HC_vs_MS.NoTrt_F |
| MSH2       | 0.00297 | -0.2706 | 0.13  | 0.23 | 1 | HC_vs_MS.NoTrt_F |

|            |         |         |       |      |   |                  |
|------------|---------|---------|-------|------|---|------------------|
| WDR77      | 0.00297 | -0.4727 | 0.136 | 0.24 | 1 | HC_vs_MS.NoTrt_F |
| POMGNT1    | 0.00298 | 0.30358 | 0.766 | 0.67 | 1 | HC_vs_MS.NoTrt_F |
| TNK2       | 0.00299 | -0.3143 | 0.182 | 0.29 | 1 | HC_vs_MS.NoTrt_F |
| VCPKMT     | 0.003   | -0.4797 | 0.118 | 0.22 | 1 | HC_vs_MS.NoTrt_F |
| SRGAP2B    | 0.00301 | -0.699  | 0.503 | 0.6  | 1 | HC_vs_MS.NoTrt_F |
| ZSCAN26    | 0.00305 | -0.2641 | 0.072 | 0.16 | 1 | HC_vs_MS.NoTrt_F |
| PIBF1      | 0.00306 | 0.41166 | 0.162 | 0.28 | 1 | HC_vs_MS.NoTrt_F |
| TRIM8      | 0.00307 | -0.9481 | 0.087 | 0.17 | 1 | HC_vs_MS.NoTrt_F |
| TBC1D22B   | 0.00312 | -0.636  | 0.095 | 0.18 | 1 | HC_vs_MS.NoTrt_F |
| LRRC45     | 0.00315 | -0.3811 | 0.075 | 0.16 | 1 | HC_vs_MS.NoTrt_F |
| COX16      | 0.00315 | -0.5872 | 0.552 | 0.62 | 1 | HC_vs_MS.NoTrt_F |
| FAM86B1    | 0.00315 | -1.2341 | 0.081 | 0.17 | 1 | HC_vs_MS.NoTrt_F |
| ARHGEF12   | 0.00316 | 0.50931 | 0.988 | 0.98 | 1 | HC_vs_MS.NoTrt_F |
| MAN1A2     | 0.00317 | -0.3851 | 0.367 | 0.48 | 1 | HC_vs_MS.NoTrt_F |
| RAB11FIP5  | 0.00318 | 0.27827 | 0.049 | 0.12 | 1 | HC_vs_MS.NoTrt_F |
| POLDIP3    | 0.00318 | -0.575  | 0.191 | 0.3  | 1 | HC_vs_MS.NoTrt_F |
| DNTTIP1    | 0.00319 | 0.48699 | 0.066 | 0.15 | 1 | HC_vs_MS.NoTrt_F |
| TRAFD1     | 0.00319 | -0.608  | 0.243 | 0.35 | 1 | HC_vs_MS.NoTrt_F |
| ZNF26      | 0.0032  | 0.52682 | 0.994 | 0.99 | 1 | HC_vs_MS.NoTrt_F |
| KCNJ15     | 0.0032  | 0.5284  | 0.705 | 0.56 | 1 | HC_vs_MS.NoTrt_F |
| MRPL15     | 0.00322 | 0.56876 | 0.098 | 0.19 | 1 | HC_vs_MS.NoTrt_F |
| HMGB2      | 0.00323 | -0.3451 | 0.249 | 0.37 | 1 | HC_vs_MS.NoTrt_F |
| AL356053.1 | 0.00324 | 0.30045 | 0.049 | 0.12 | 1 | HC_vs_MS.NoTrt_F |
| MFSD3      | 0.00324 | 0.51302 | 0.064 | 0.14 | 1 | HC_vs_MS.NoTrt_F |
| ATP2C1     | 0.00326 | -0.3125 | 0.191 | 0.3  | 1 | HC_vs_MS.NoTrt_F |
| CTD-2021K4 | 0.0033  | -0.3418 | 0.095 | 0.18 | 1 | HC_vs_MS.NoTrt_F |
| CHIC2      | 0.0033  | -0.3171 | 0.214 | 0.33 | 1 | HC_vs_MS.NoTrt_F |
| TNRC6C     | 0.00332 | 0.31876 | 0.263 | 0.39 | 1 | HC_vs_MS.NoTrt_F |
| YKT6       | 0.00334 | -0.3269 | 0.124 | 0.22 | 1 | HC_vs_MS.NoTrt_F |
| TCF19      | 0.00334 | -0.4549 | 0.072 | 0.16 | 1 | HC_vs_MS.NoTrt_F |
| SLC52A2    | 0.00334 | -0.7743 | 0.043 | 0.11 | 1 | HC_vs_MS.NoTrt_F |
| TTC33      | 0.00335 | -0.5947 | 0.246 | 0.36 | 1 | HC_vs_MS.NoTrt_F |
| B4GALT3    | 0.00335 | -0.2626 | 0.214 | 0.34 | 1 | HC_vs_MS.NoTrt_F |
| MCM3       | 0.00335 | -0.307  | 0.225 | 0.34 | 1 | HC_vs_MS.NoTrt_F |
| TMEM218    | 0.00338 | -1.5066 | 0.116 | 0.2  | 1 | HC_vs_MS.NoTrt_F |
| FAM213A    | 0.00339 | 0.81118 | 0.893 | 0.87 | 1 | HC_vs_MS.NoTrt_F |
| TARBP2     | 0.00343 | -0.5456 | 0.095 | 0.18 | 1 | HC_vs_MS.NoTrt_F |
| UBR2       | 0.00344 | 0.46447 | 0.549 | 0.67 | 1 | HC_vs_MS.NoTrt_F |
| CPEB4      | 0.00345 | -0.2969 | 0.197 | 0.3  | 1 | HC_vs_MS.NoTrt_F |
| TRMT6      | 0.00347 | -0.3586 | 0.118 | 0.22 | 1 | HC_vs_MS.NoTrt_F |



|            |         |         |       |      |   |                  |
|------------|---------|---------|-------|------|---|------------------|
| RC3H2      | 0.00348 | -0.5411 | 0.503 | 0.61 | 1 | HC_vs_MS.NoTrt_F |
| PIGV       | 0.00348 | -0.8175 | 0.072 | 0.16 | 1 | HC_vs_MS.NoTrt_F |
| C3orf38    | 0.00351 | -0.6243 | 0.104 | 0.19 | 1 | HC_vs_MS.NoTrt_F |
| RNF34      | 0.00352 | -0.3593 | 0.272 | 0.4  | 1 | HC_vs_MS.NoTrt_F |
| AGPAT1     | 0.00352 | -0.9705 | 0.118 | 0.21 | 1 | HC_vs_MS.NoTrt_F |
| TMPPE      | 0.00352 | -0.4599 | 0.061 | 0.14 | 1 | HC_vs_MS.NoTrt_F |
| DENND4B    | 0.00353 | -0.5224 | 0.22  | 0.34 | 1 | HC_vs_MS.NoTrt_F |
| COMMD5     | 0.00355 | -0.4764 | 0.098 | 0.19 | 1 | HC_vs_MS.NoTrt_F |
| AMACR      | 0.00356 | -1.2004 | 0.075 | 0.16 | 1 | HC_vs_MS.NoTrt_F |
| ASTN2      | 0.00357 | 0.3847  | 0.977 | 0.96 | 1 | HC_vs_MS.NoTrt_F |
| ZNF689     | 0.00358 | 0.92273 | 0.046 | 0.12 | 1 | HC_vs_MS.NoTrt_F |
| OSBPL11    | 0.00361 | -0.6015 | 0.118 | 0.21 | 1 | HC_vs_MS.NoTrt_F |
| ARL17B     | 0.00362 | -0.2726 | 0.78  | 0.85 | 1 | HC_vs_MS.NoTrt_F |
| ZNF224     | 0.00364 | -1.2469 | 0.451 | 0.56 | 1 | HC_vs_MS.NoTrt_F |
| SLC35A2    | 0.00364 | -0.5624 | 0.104 | 0.19 | 1 | HC_vs_MS.NoTrt_F |
| NOG        | 0.00365 | 0.30807 | 0.139 | 0.24 | 1 | HC_vs_MS.NoTrt_F |
| PES1       | 0.00366 | -0.2727 | 0.142 | 0.24 | 1 | HC_vs_MS.NoTrt_F |
| HSPA13     | 0.00369 | -1.2074 | 0.043 | 0.11 | 1 | HC_vs_MS.NoTrt_F |
| C7         | 0.0037  | -0.4205 | 0.387 | 0.51 | 1 | HC_vs_MS.NoTrt_F |
| SNX24      | 0.00371 | 0.32816 | 0.043 | 0.11 | 1 | HC_vs_MS.NoTrt_F |
| NUDT16     | 0.00371 | -0.9116 | 0.087 | 0.17 | 1 | HC_vs_MS.NoTrt_F |
| NBN        | 0.00372 | -0.3023 | 0.136 | 0.23 | 1 | HC_vs_MS.NoTrt_F |
| PDHA1      | 0.00374 | -0.2553 | 0.249 | 0.37 | 1 | HC_vs_MS.NoTrt_F |
| PIP4K2C    | 0.00374 | -0.4996 | 0.243 | 0.34 | 1 | HC_vs_MS.NoTrt_F |
| CCR6       | 0.00377 | -0.5568 | 0.419 | 0.53 | 1 | HC_vs_MS.NoTrt_F |
| UMAD1      | 0.00377 | -0.3189 | 0.22  | 0.34 | 1 | HC_vs_MS.NoTrt_F |
| UBE2Q2     | 0.00378 | -0.2787 | 0.15  | 0.26 | 1 | HC_vs_MS.NoTrt_F |
| CENPJ      | 0.00379 | -0.6745 | 0.055 | 0.13 | 1 | HC_vs_MS.NoTrt_F |
| CRAMP1     | 0.00379 | -1.4929 | 0.104 | 0.19 | 1 | HC_vs_MS.NoTrt_F |
| DLG3       | 0.00382 | 0.38383 | 0.046 | 0.12 | 1 | HC_vs_MS.NoTrt_F |
| VPS36      | 0.00383 | -0.5047 | 0.358 | 0.48 | 1 | HC_vs_MS.NoTrt_F |
| FKBP9      | 0.00386 | 0.53353 | 0.59  | 0.48 | 1 | HC_vs_MS.NoTrt_F |
| IL33       | 0.00387 | 0.49433 | 0.046 | 0.12 | 1 | HC_vs_MS.NoTrt_F |
| EEPD1      | 0.00388 | 0.29542 | 0.092 | 0.18 | 1 | HC_vs_MS.NoTrt_F |
| FBXO41     | 0.00389 | 0.64854 | 0.061 | 0.14 | 1 | HC_vs_MS.NoTrt_F |
| AL592183.1 | 0.0039  | -0.3973 | 0.118 | 0.21 | 1 | HC_vs_MS.NoTrt_F |
| UBALD2     | 0.0039  | -0.3975 | 0.118 | 0.21 | 1 | HC_vs_MS.NoTrt_F |
| NUP205     | 0.00392 | -0.3925 | 0.202 | 0.31 | 1 | HC_vs_MS.NoTrt_F |
| CD7        | 0.00393 | 0.28746 | 0.289 | 0.41 | 1 | HC_vs_MS.NoTrt_F |
| MMGT1      | 0.00397 | -0.7081 | 0.118 | 0.21 | 1 | HC_vs_MS.NoTrt_F |

|           |         |         |       |      |   |                  |
|-----------|---------|---------|-------|------|---|------------------|
| ERCC6L2   | 0.00397 | -0.5777 | 0.234 | 0.35 | 1 | HC_vs_MS.NoTrt_F |
| AP5S1     | 0.00397 | 0.78529 | 0.876 | 0.8  | 1 | HC_vs_MS.NoTrt_F |
| CCNI2     | 0.00398 | -0.2872 | 0.043 | 0.11 | 1 | HC_vs_MS.NoTrt_F |
| PLEKHB1   | 0.004   | -0.7488 | 0.107 | 0.19 | 1 | HC_vs_MS.NoTrt_F |
| FAM122B   | 0.00402 | -0.2861 | 0.13  | 0.23 | 1 | HC_vs_MS.NoTrt_F |
| TRIAP1    | 0.00402 | -0.3362 | 0.11  | 0.2  | 1 | HC_vs_MS.NoTrt_F |
| FAM221A   | 0.00406 | 0.30568 | 0.983 | 0.98 | 1 | HC_vs_MS.NoTrt_F |
| WDR53     | 0.00406 | -0.2861 | 0.116 | 0.21 | 1 | HC_vs_MS.NoTrt_F |
| ANAPC11   | 0.00406 | 0.33127 | 0.422 | 0.54 | 1 | HC_vs_MS.NoTrt_F |
| RBL2      | 0.00407 | -0.3098 | 0.621 | 0.71 | 1 | HC_vs_MS.NoTrt_F |
| PHF10     | 0.00409 | 0.95188 | 0.113 | 0.2  | 1 | HC_vs_MS.NoTrt_F |
| TRAPPC10  | 0.0041  | 0.80618 | 0.295 | 0.42 | 1 | HC_vs_MS.NoTrt_F |
| WIPF1     | 0.00411 | -0.3606 | 0.711 | 0.8  | 1 | HC_vs_MS.NoTrt_F |
| LTA       | 0.00415 | -0.2828 | 0.09  | 0.18 | 1 | HC_vs_MS.NoTrt_F |
| PRPS1     | 0.00415 | -0.2596 | 0.162 | 0.27 | 1 | HC_vs_MS.NoTrt_F |
| MMADHC    | 0.00416 | -0.4388 | 0.422 | 0.54 | 1 | HC_vs_MS.NoTrt_F |
| TMED1     | 0.00417 | 0.27503 | 0.069 | 0.15 | 1 | HC_vs_MS.NoTrt_F |
| HLA-DQB1  | 0.00417 | 0.79311 | 0.581 | 0.7  | 1 | HC_vs_MS.NoTrt_F |
| GPLD1     | 0.00418 | 0.59499 | 0.78  | 0.71 | 1 | HC_vs_MS.NoTrt_F |
| RGMB      | 0.00418 | -0.8065 | 0.116 | 0.2  | 1 | HC_vs_MS.NoTrt_F |
| SCRIB     | 0.0042  | 0.40834 | 0.043 | 0.11 | 1 | HC_vs_MS.NoTrt_F |
| ZFYVE1    | 0.0042  | -0.259  | 0.095 | 0.18 | 1 | HC_vs_MS.NoTrt_F |
| ADAM17    | 0.00422 | -0.5608 | 0.078 | 0.16 | 1 | HC_vs_MS.NoTrt_F |
| TXNDC16   | 0.00422 | 0.45165 | 0.133 | 0.23 | 1 | HC_vs_MS.NoTrt_F |
| POLR2E    | 0.00422 | -0.3005 | 0.564 | 0.66 | 1 | HC_vs_MS.NoTrt_F |
| CDH13     | 0.00424 | 0.34759 | 0.841 | 0.74 | 1 | HC_vs_MS.NoTrt_F |
| KIAA0922  | 0.00426 | -0.2572 | 0.468 | 0.58 | 1 | HC_vs_MS.NoTrt_F |
| MAP3K7    | 0.00427 | -0.374  | 0.159 | 0.26 | 1 | HC_vs_MS.NoTrt_F |
| INTS6L    | 0.00428 | -0.6202 | 0.142 | 0.24 | 1 | HC_vs_MS.NoTrt_F |
| RGS1      | 0.0043  | -0.3324 | 0.575 | 0.7  | 1 | HC_vs_MS.NoTrt_F |
| MRM1      | 0.0043  | -0.4163 | 0.04  | 0.11 | 1 | HC_vs_MS.NoTrt_F |
| FBF1      | 0.00433 | 1.02341 | 0.058 | 0.13 | 1 | HC_vs_MS.NoTrt_F |
| FXN       | 0.00435 | -0.3047 | 0.22  | 0.33 | 1 | HC_vs_MS.NoTrt_F |
| ANKMY2    | 0.00436 | -0.287  | 0.078 | 0.16 | 1 | HC_vs_MS.NoTrt_F |
| RAB11FIP2 | 0.00437 | -0.5086 | 0.066 | 0.14 | 1 | HC_vs_MS.NoTrt_F |
| FAM185A   | 0.00437 | -0.4838 | 0.113 | 0.2  | 1 | HC_vs_MS.NoTrt_F |
| RPTOR     | 0.00438 | 0.61479 | 0.393 | 0.53 | 1 | HC_vs_MS.NoTrt_F |
| ALDH9A1   | 0.00439 | -0.469  | 0.205 | 0.32 | 1 | HC_vs_MS.NoTrt_F |
| DUSP7     | 0.0044  | 0.39351 | 0.118 | 0.21 | 1 | HC_vs_MS.NoTrt_F |
| ZNF324    | 0.0044  | 0.37694 | 0.066 | 0.14 | 1 | HC_vs_MS.NoTrt_F |

|          |         |         |       |      |   |                  |
|----------|---------|---------|-------|------|---|------------------|
| MDM1     | 0.00441 | -0.2854 | 0.11  | 0.2  | 1 | HC_vs_MS.NoTrt_F |
| MS4A10   | 0.00442 | 0.30697 | 0.746 | 0.64 | 1 | HC_vs_MS.NoTrt_F |
| E4F1     | 0.00442 | -0.4127 | 0.159 | 0.25 | 1 | HC_vs_MS.NoTrt_F |
| DHX58    | 0.00445 | 1.19148 | 0.04  | 0.11 | 1 | HC_vs_MS.NoTrt_F |
| EDEM2    | 0.00449 | -0.3141 | 0.171 | 0.27 | 1 | HC_vs_MS.NoTrt_F |
| FAM103A1 | 0.00449 | -0.3407 | 0.156 | 0.26 | 1 | HC_vs_MS.NoTrt_F |
| CCAR2    | 0.0045  | -0.8662 | 0.272 | 0.39 | 1 | HC_vs_MS.NoTrt_F |
| RDH14    | 0.0045  | 0.8466  | 0.058 | 0.13 | 1 | HC_vs_MS.NoTrt_F |
| RIOK1    | 0.00452 | -0.4098 | 0.136 | 0.23 | 1 | HC_vs_MS.NoTrt_F |
| ATP6V1C1 | 0.00452 | 0.36847 | 0.494 | 0.6  | 1 | HC_vs_MS.NoTrt_F |
| CDIP1    | 0.00452 | -0.4094 | 0.223 | 0.33 | 1 | HC_vs_MS.NoTrt_F |
| APEH     | 0.00458 | -0.3894 | 0.211 | 0.32 | 1 | HC_vs_MS.NoTrt_F |
| RBM25    | 0.0046  | -0.3198 | 0.587 | 0.67 | 1 | HC_vs_MS.NoTrt_F |
| PARL     | 0.00461 | -0.3858 | 0.162 | 0.27 | 1 | HC_vs_MS.NoTrt_F |
| RAB9A    | 0.00464 | -0.6091 | 0.116 | 0.2  | 1 | HC_vs_MS.NoTrt_F |
| BORCS8   | 0.00469 | 0.32891 | 0.962 | 0.95 | 1 | HC_vs_MS.NoTrt_F |
| TAS2R4   | 0.00469 | -0.7233 | 0.355 | 0.47 | 1 | HC_vs_MS.NoTrt_F |
| DDX39A   | 0.00469 | -0.3272 | 0.355 | 0.48 | 1 | HC_vs_MS.NoTrt_F |
| BBS4     | 0.0047  | -0.3064 | 0.107 | 0.19 | 1 | HC_vs_MS.NoTrt_F |
| CTCF     | 0.00471 | 0.94282 | 0.133 | 0.23 | 1 | HC_vs_MS.NoTrt_F |
| CARNMT1  | 0.00471 | -0.3769 | 0.145 | 0.24 | 1 | HC_vs_MS.NoTrt_F |
| MZF1     | 0.00474 | 0.35321 | 0.133 | 0.23 | 1 | HC_vs_MS.NoTrt_F |
| LRRC37B  | 0.00474 | 0.2612  | 0.61  | 0.8  | 1 | HC_vs_MS.NoTrt_F |
| DDX42    | 0.00476 | 0.28405 | 0.373 | 0.49 | 1 | HC_vs_MS.NoTrt_F |
| NUP155   | 0.0048  | 0.64625 | 0.942 | 0.91 | 1 | HC_vs_MS.NoTrt_F |
| UBA5     | 0.00481 | -0.8927 | 0.136 | 0.23 | 1 | HC_vs_MS.NoTrt_F |
| CHERP    | 0.00484 | -0.4843 | 0.191 | 0.29 | 1 | HC_vs_MS.NoTrt_F |
| IGSF8    | 0.00485 | -0.4311 | 0.179 | 0.28 | 1 | HC_vs_MS.NoTrt_F |
| RWDD3    | 0.00485 | -0.45   | 0.124 | 0.22 | 1 | HC_vs_MS.NoTrt_F |
| OGDH     | 0.00489 | -0.3533 | 0.595 | 0.69 | 1 | HC_vs_MS.NoTrt_F |
| RAB14    | 0.00492 | -0.3201 | 0.269 | 0.38 | 1 | HC_vs_MS.NoTrt_F |
| TCEAL3   | 0.00492 | -0.7259 | 0.15  | 0.24 | 1 | HC_vs_MS.NoTrt_F |
| COMMD8   | 0.00494 | -0.3657 | 0.118 | 0.21 | 1 | HC_vs_MS.NoTrt_F |
| GPR108   | 0.00494 | -0.5429 | 0.214 | 0.32 | 1 | HC_vs_MS.NoTrt_F |
| GMPPA    | 0.00495 | -0.5404 | 0.292 | 0.41 | 1 | HC_vs_MS.NoTrt_F |
| RBM27    | 0.00497 | -0.3727 | 0.145 | 0.24 | 1 | HC_vs_MS.NoTrt_F |
| CHD1L    | 0.00497 | 0.5427  | 0.113 | 0.2  | 1 | HC_vs_MS.NoTrt_F |
| ZNF595   | 0.00497 | 0.47042 | 0.858 | 0.81 | 1 | HC_vs_MS.NoTrt_F |
| WAS      | 0.00498 | 0.85635 | 0.332 | 0.46 | 1 | HC_vs_MS.NoTrt_F |
| RALA     | 0.00498 | -0.47   | 0.246 | 0.35 | 1 | HC_vs_MS.NoTrt_F |

|          |         |         |       |      |   |                  |
|----------|---------|---------|-------|------|---|------------------|
| PRR4     | 0.00499 | 0.45574 | 0.26  | 0.4  | 1 | HC_vs_MS.NoTrt_F |
| RAB28    | 0.005   | 0.25722 | 0.136 | 0.24 | 1 | HC_vs_MS.NoTrt_F |
| TMEM173  | 0.00503 | -0.326  | 0.327 | 0.45 | 1 | HC_vs_MS.NoTrt_F |
| SERPING1 | 0.00504 | 1.80111 | 0.15  | 0.07 | 1 | HC_vs_MS.NoTrt_F |
| HOPX     | 0.00504 | 0.4944  | 0.893 | 0.85 | 1 | HC_vs_MS.NoTrt_F |
| RAB21    | 0.00505 | 0.68082 | 0.983 | 0.98 | 1 | HC_vs_MS.NoTrt_F |
| RITA1    | 0.00508 | -0.2952 | 0.064 | 0.14 | 1 | HC_vs_MS.NoTrt_F |
| ECHS1    | 0.00508 | 0.33968 | 0.153 | 0.25 | 1 | HC_vs_MS.NoTrt_F |
| ARHGAP28 | 0.00511 | 0.32948 | 0.887 | 0.9  | 1 | HC_vs_MS.NoTrt_F |
| PET117   | 0.00511 | -0.2904 | 0.095 | 0.18 | 1 | HC_vs_MS.NoTrt_F |
| GNAL     | 0.00512 | -0.2617 | 0.526 | 0.63 | 1 | HC_vs_MS.NoTrt_F |
| ZNF544   | 0.00516 | 0.33193 | 0.954 | 0.93 | 1 | HC_vs_MS.NoTrt_F |
| XKR9     | 0.00518 | 0.33298 | 0.699 | 0.62 | 1 | HC_vs_MS.NoTrt_F |
| TFPT     | 0.00519 | 0.30001 | 0.101 | 0.19 | 1 | HC_vs_MS.NoTrt_F |
| ERBIN    | 0.00519 | -0.5334 | 0.286 | 0.41 | 1 | HC_vs_MS.NoTrt_F |
| DPAGT1   | 0.0052  | -0.984  | 0.084 | 0.16 | 1 | HC_vs_MS.NoTrt_F |
| CSNK2A2  | 0.00523 | -0.9278 | 0.344 | 0.44 | 1 | HC_vs_MS.NoTrt_F |
| GOLGB1   | 0.00525 | -0.4006 | 0.616 | 0.7  | 1 | HC_vs_MS.NoTrt_F |
| SDHAF1   | 0.00527 | -0.5896 | 0.087 | 0.17 | 1 | HC_vs_MS.NoTrt_F |
| GBP3     | 0.00531 | -0.3598 | 0.225 | 0.33 | 1 | HC_vs_MS.NoTrt_F |
| PRPS2    | 0.00533 | -0.5226 | 0.136 | 0.23 | 1 | HC_vs_MS.NoTrt_F |
| ISOC1    | 0.00534 | -0.2522 | 0.124 | 0.22 | 1 | HC_vs_MS.NoTrt_F |
| TMEM117  | 0.00535 | -0.6363 | 0.075 | 0.16 | 1 | HC_vs_MS.NoTrt_F |
| PRPF38A  | 0.00536 | -0.7749 | 0.673 | 0.73 | 1 | HC_vs_MS.NoTrt_F |
| ARFIP1   | 0.00536 | 0.53453 | 0.251 | 0.37 | 1 | HC_vs_MS.NoTrt_F |
| ARRB2    | 0.00537 | -0.6509 | 0.829 | 0.88 | 1 | HC_vs_MS.NoTrt_F |
| CDC42SE1 | 0.0054  | -0.568  | 0.491 | 0.57 | 1 | HC_vs_MS.NoTrt_F |
| STRA13   | 0.00541 | 0.28265 | 0.168 | 0.28 | 1 | HC_vs_MS.NoTrt_F |
| ABHD10   | 0.00542 | -0.7367 | 0.116 | 0.2  | 1 | HC_vs_MS.NoTrt_F |
| GSN      | 0.00546 | 1.49689 | 0.714 | 0.64 | 1 | HC_vs_MS.NoTrt_F |
| NELFB    | 0.00547 | -0.7939 | 0.072 | 0.15 | 1 | HC_vs_MS.NoTrt_F |
| RAVER1   | 0.00548 | -0.3839 | 0.173 | 0.28 | 1 | HC_vs_MS.NoTrt_F |
| ERAP2    | 0.00548 | -0.715  | 0.679 | 0.77 | 1 | HC_vs_MS.NoTrt_F |
| IL23A    | 0.00549 | 0.32962 | 0.052 | 0.12 | 1 | HC_vs_MS.NoTrt_F |
| RASGEF1B | 0.00553 | 1.13851 | 0.812 | 0.76 | 1 | HC_vs_MS.NoTrt_F |
| BTN2A2   | 0.00555 | 0.37993 | 0.101 | 0.19 | 1 | HC_vs_MS.NoTrt_F |
| GGA3     | 0.00557 | -0.2538 | 0.191 | 0.29 | 1 | HC_vs_MS.NoTrt_F |
| SYAP1    | 0.00557 | 0.48267 | 0.98  | 0.98 | 1 | HC_vs_MS.NoTrt_F |
| TMEM229B | 0.00558 | -0.5909 | 0.231 | 0.35 | 1 | HC_vs_MS.NoTrt_F |
| ZNF671   | 0.00558 | -0.6499 | 0.098 | 0.18 | 1 | HC_vs_MS.NoTrt_F |

|            |         |         |       |      |   |                  |
|------------|---------|---------|-------|------|---|------------------|
| APOBEC2    | 0.0056  | 0.40013 | 0.064 | 0.14 | 1 | HC_vs_MS.NoTrt_F |
| RIC8B      | 0.00562 | -0.3354 | 0.165 | 0.26 | 1 | HC_vs_MS.NoTrt_F |
| SEMA3C     | 0.00563 | -0.2834 | 0.656 | 0.81 | 1 | HC_vs_MS.NoTrt_F |
| THAP4      | 0.00565 | 0.3094  | 0.185 | 0.29 | 1 | HC_vs_MS.NoTrt_F |
| OPA1       | 0.00566 | -0.2691 | 0.156 | 0.26 | 1 | HC_vs_MS.NoTrt_F |
| LANCL1     | 0.00567 | -0.5248 | 0.179 | 0.28 | 1 | HC_vs_MS.NoTrt_F |
| FOXK2      | 0.00567 | -0.3934 | 0.318 | 0.42 | 1 | HC_vs_MS.NoTrt_F |
| TLCD2      | 0.0057  | 0.37908 | 0.948 | 0.96 | 1 | HC_vs_MS.NoTrt_F |
| GORASP2    | 0.00571 | -0.3425 | 0.228 | 0.33 | 1 | HC_vs_MS.NoTrt_F |
| IARS       | 0.00573 | -0.2907 | 0.705 | 0.79 | 1 | HC_vs_MS.NoTrt_F |
| SKIL       | 0.00574 | 0.53526 | 0.341 | 0.47 | 1 | HC_vs_MS.NoTrt_F |
| CDK12      | 0.00575 | -0.3138 | 0.561 | 0.65 | 1 | HC_vs_MS.NoTrt_F |
| ZNF646     | 0.00575 | -0.4132 | 0.092 | 0.18 | 1 | HC_vs_MS.NoTrt_F |
| SLC39A6    | 0.00576 | -0.6038 | 0.095 | 0.18 | 1 | HC_vs_MS.NoTrt_F |
| PRKAR1B    | 0.00577 | -0.3899 | 0.127 | 0.22 | 1 | HC_vs_MS.NoTrt_F |
| ATP10B     | 0.00578 | 0.39152 | 0.824 | 0.76 | 1 | HC_vs_MS.NoTrt_F |
| FRMD5      | 0.00578 | 0.36981 | 0.049 | 0.12 | 1 | HC_vs_MS.NoTrt_F |
| FIP1L1     | 0.00584 | -0.2511 | 0.295 | 0.41 | 1 | HC_vs_MS.NoTrt_F |
| ATAD3B     | 0.00585 | -0.5589 | 0.812 | 0.89 | 1 | HC_vs_MS.NoTrt_F |
| ARHGAP22   | 0.00586 | 0.25777 | 0.734 | 0.65 | 1 | HC_vs_MS.NoTrt_F |
| KIF27      | 0.00588 | 0.35214 | 0.474 | 0.36 | 1 | HC_vs_MS.NoTrt_F |
| KDEL2      | 0.00592 | -0.4783 | 0.208 | 0.32 | 1 | HC_vs_MS.NoTrt_F |
| EXOSC8     | 0.00596 | -0.9148 | 0.512 | 0.56 | 1 | HC_vs_MS.NoTrt_F |
| KIFC1      | 0.00597 | 0.52872 | 0.081 | 0.16 | 1 | HC_vs_MS.NoTrt_F |
| SNX12      | 0.00602 | -1.1809 | 0.116 | 0.2  | 1 | HC_vs_MS.NoTrt_F |
| GPD1L      | 0.00602 | -0.725  | 0.136 | 0.23 | 1 | HC_vs_MS.NoTrt_F |
| YBEY       | 0.00606 | -0.5457 | 0.072 | 0.15 | 1 | HC_vs_MS.NoTrt_F |
| NUDT5      | 0.00612 | 0.25293 | 0.24  | 0.37 | 1 | HC_vs_MS.NoTrt_F |
| LCMT2      | 0.00613 | -0.2891 | 0.723 | 0.77 | 1 | HC_vs_MS.NoTrt_F |
| RCN1       | 0.00614 | -0.5923 | 0.116 | 0.2  | 1 | HC_vs_MS.NoTrt_F |
| MAF        | 0.00619 | 1.0016  | 0.538 | 0.46 | 1 | HC_vs_MS.NoTrt_F |
| MVK        | 0.00622 | -0.4755 | 0.058 | 0.13 | 1 | HC_vs_MS.NoTrt_F |
| PPP1R10    | 0.00623 | -0.681  | 0.564 | 0.65 | 1 | HC_vs_MS.NoTrt_F |
| OSGEPL1    | 0.00624 | 0.25981 | 0.257 | 0.39 | 1 | HC_vs_MS.NoTrt_F |
| MAP2K3     | 0.00626 | -0.2927 | 0.194 | 0.3  | 1 | HC_vs_MS.NoTrt_F |
| C8orf33    | 0.00626 | -0.3986 | 0.249 | 0.37 | 1 | HC_vs_MS.NoTrt_F |
| SLU7       | 0.00627 | -0.4421 | 0.442 | 0.55 | 1 | HC_vs_MS.NoTrt_F |
| AC138645.2 | 0.00628 | -0.3926 | 0.124 | 0.22 | 1 | HC_vs_MS.NoTrt_F |
| KIAA0513   | 0.00628 | 0.41516 | 0.743 | 0.64 | 1 | HC_vs_MS.NoTrt_F |
| C5orf51    | 0.00634 | -0.45   | 0.145 | 0.24 | 1 | HC_vs_MS.NoTrt_F |

|            |         |         |       |      |   |                  |
|------------|---------|---------|-------|------|---|------------------|
| EPN1       | 0.00635 | 0.45148 | 0.957 | 0.96 | 1 | HC_vs_MS.NoTrt_F |
| FAM196B    | 0.00635 | 0.29643 | 0.092 | 0.18 | 1 | HC_vs_MS.NoTrt_F |
| UBE2G1     | 0.00638 | -0.3137 | 0.225 | 0.34 | 1 | HC_vs_MS.NoTrt_F |
| UTRN       | 0.00639 | -0.3101 | 0.52  | 0.62 | 1 | HC_vs_MS.NoTrt_F |
| SUMO2      | 0.00642 | -0.2554 | 0.893 | 0.9  | 1 | HC_vs_MS.NoTrt_F |
| EIF2AK3    | 0.00642 | 0.30757 | 0.072 | 0.15 | 1 | HC_vs_MS.NoTrt_F |
| AHCYL1     | 0.00643 | 0.69207 | 0.072 | 0.15 | 1 | HC_vs_MS.NoTrt_F |
| GPR25      | 0.00648 | 0.7446  | 0.046 | 0.11 | 1 | HC_vs_MS.NoTrt_F |
| 2-Sep      | 0.00648 | -0.4153 | 0.925 | 0.93 | 1 | HC_vs_MS.NoTrt_F |
| FKBP14     | 0.00655 | 0.29512 | 0.728 | 0.65 | 1 | HC_vs_MS.NoTrt_F |
| PAK1IP1    | 0.00659 | 0.28223 | 0.061 | 0.13 | 1 | HC_vs_MS.NoTrt_F |
| UCK1       | 0.00659 | 0.97905 | 0.061 | 0.13 | 1 | HC_vs_MS.NoTrt_F |
| ATG4C      | 0.0066  | 0.49556 | 0.061 | 0.13 | 1 | HC_vs_MS.NoTrt_F |
| LXN        | 0.0066  | -0.3545 | 0.202 | 0.3  | 1 | HC_vs_MS.NoTrt_F |
| STOML1     | 0.00661 | 0.35395 | 0.847 | 0.77 | 1 | HC_vs_MS.NoTrt_F |
| PNPLA6     | 0.00662 | 0.28064 | 0.185 | 0.29 | 1 | HC_vs_MS.NoTrt_F |
| AP2M1      | 0.00662 | -0.261  | 0.361 | 0.48 | 1 | HC_vs_MS.NoTrt_F |
| TSPAN18    | 0.00664 | 0.25097 | 0.084 | 0.17 | 1 | HC_vs_MS.NoTrt_F |
| FMC1       | 0.00665 | -0.2842 | 0.662 | 0.78 | 1 | HC_vs_MS.NoTrt_F |
| IPO4       | 0.00666 | -0.4649 | 0.043 | 0.11 | 1 | HC_vs_MS.NoTrt_F |
| ZNF7       | 0.00667 | 0.32795 | 0.934 | 0.96 | 1 | HC_vs_MS.NoTrt_F |
| FAM114A1   | 0.00673 | 0.58688 | 0.618 | 0.5  | 1 | HC_vs_MS.NoTrt_F |
| DYNC1LI1   | 0.00674 | -0.4085 | 0.46  | 0.57 | 1 | HC_vs_MS.NoTrt_F |
| TFB2M      | 0.00676 | 0.42218 | 0.069 | 0.14 | 1 | HC_vs_MS.NoTrt_F |
| SLC5A10    | 0.00678 | -0.5213 | 0.058 | 0.13 | 1 | HC_vs_MS.NoTrt_F |
| SPATS2L    | 0.0068  | 0.35023 | 0.968 | 0.94 | 1 | HC_vs_MS.NoTrt_F |
| MIS18A     | 0.00681 | 0.96769 | 0.075 | 0.16 | 1 | HC_vs_MS.NoTrt_F |
| SLC37A1    | 0.00682 | -0.3871 | 0.087 | 0.17 | 1 | HC_vs_MS.NoTrt_F |
| CXorf65    | 0.00685 | 0.63414 | 0.092 | 0.18 | 1 | HC_vs_MS.NoTrt_F |
| ARMT1      | 0.00687 | -0.2681 | 0.09  | 0.17 | 1 | HC_vs_MS.NoTrt_F |
| SAMM50     | 0.00689 | -0.3304 | 0.465 | 0.56 | 1 | HC_vs_MS.NoTrt_F |
| WDR44      | 0.0069  | -0.6308 | 0.133 | 0.22 | 1 | HC_vs_MS.NoTrt_F |
| ANKRD39    | 0.0069  | 0.37292 | 0.214 | 0.33 | 1 | HC_vs_MS.NoTrt_F |
| AC013461.1 | 0.00692 | 0.48449 | 0.844 | 0.77 | 1 | HC_vs_MS.NoTrt_F |
| ZNF211     | 0.00694 | 0.30935 | 0.202 | 0.3  | 1 | HC_vs_MS.NoTrt_F |
| WDR31      | 0.00695 | 0.28088 | 0.882 | 0.84 | 1 | HC_vs_MS.NoTrt_F |
| SPC25      | 0.00696 | 0.43323 | 0.763 | 0.71 | 1 | HC_vs_MS.NoTrt_F |
| RAB4A      | 0.00697 | -0.5483 | 0.118 | 0.2  | 1 | HC_vs_MS.NoTrt_F |
| DHRS13     | 0.00698 | 0.5666  | 0.061 | 0.13 | 1 | HC_vs_MS.NoTrt_F |
| RCC2       | 0.00699 | -0.65   | 0.13  | 0.22 | 1 | HC_vs_MS.NoTrt_F |

|          |         |         |       |      |   |                  |
|----------|---------|---------|-------|------|---|------------------|
| GPATCH1  | 0.00701 | -0.3206 | 0.413 | 0.53 | 1 | HC_vs_MS.NoTrt_F |
| UPRT     | 0.00706 | 0.3501  | 0.069 | 0.14 | 1 | HC_vs_MS.NoTrt_F |
| MRPL55   | 0.00706 | 0.66316 | 0.121 | 0.21 | 1 | HC_vs_MS.NoTrt_F |
| NUPR1    | 0.0071  | 0.37894 | 0.977 | 0.97 | 1 | HC_vs_MS.NoTrt_F |
| RPGRIP1L | 0.00715 | 0.27903 | 0.827 | 0.74 | 1 | HC_vs_MS.NoTrt_F |
| SNX16    | 0.00718 | -0.7033 | 0.043 | 0.11 | 1 | HC_vs_MS.NoTrt_F |
| PDCD6IP  | 0.00718 | -0.258  | 0.338 | 0.46 | 1 | HC_vs_MS.NoTrt_F |
| ATP8B2   | 0.0072  | -0.3996 | 0.838 | 0.86 | 1 | HC_vs_MS.NoTrt_F |
| AQP11    | 0.00725 | 0.29135 | 0.046 | 0.11 | 1 | HC_vs_MS.NoTrt_F |
| TMEM101  | 0.00728 | 0.26    | 0.095 | 0.18 | 1 | HC_vs_MS.NoTrt_F |
| KIAA0368 | 0.00729 | -0.4256 | 0.272 | 0.38 | 1 | HC_vs_MS.NoTrt_F |
| CNNM4    | 0.00733 | 1.52591 | 0.046 | 0.11 | 1 | HC_vs_MS.NoTrt_F |
| B3GAT2   | 0.00734 | -0.4678 | 0.202 | 0.31 | 1 | HC_vs_MS.NoTrt_F |
| MBD1     | 0.00739 | -0.7075 | 0.217 | 0.32 | 1 | HC_vs_MS.NoTrt_F |
| PTAR1    | 0.00742 | -0.8192 | 0.22  | 0.32 | 1 | HC_vs_MS.NoTrt_F |
| BROX     | 0.00742 | -0.297  | 0.624 | 0.71 | 1 | HC_vs_MS.NoTrt_F |
| ZFAND6   | 0.00742 | -0.4103 | 0.26  | 0.37 | 1 | HC_vs_MS.NoTrt_F |
| FAM175B  | 0.00743 | -0.4864 | 0.078 | 0.16 | 1 | HC_vs_MS.NoTrt_F |
| NOP14    | 0.00744 | -1.1447 | 0.442 | 0.55 | 1 | HC_vs_MS.NoTrt_F |
| MUL1     | 0.00746 | -0.5159 | 0.09  | 0.17 | 1 | HC_vs_MS.NoTrt_F |
| CNEP1R1  | 0.0075  | -0.8249 | 0.555 | 0.66 | 1 | HC_vs_MS.NoTrt_F |
| MRPL35   | 0.00751 | -1.2272 | 0.156 | 0.24 | 1 | HC_vs_MS.NoTrt_F |
| PPP1R12C | 0.00753 | -0.3329 | 0.081 | 0.16 | 1 | HC_vs_MS.NoTrt_F |
| NT5C     | 0.00756 | 0.26334 | 0.205 | 0.32 | 1 | HC_vs_MS.NoTrt_F |
| HIPK2    | 0.00759 | -0.6141 | 0.13  | 0.21 | 1 | HC_vs_MS.NoTrt_F |
| NOC3L    | 0.00762 | -0.3195 | 0.078 | 0.16 | 1 | HC_vs_MS.NoTrt_F |
| UTY      | 0.00768 | -0.6945 | 0.497 | 0.57 | 1 | HC_vs_MS.NoTrt_F |
| TCEB3    | 0.00771 | -0.505  | 0.145 | 0.24 | 1 | HC_vs_MS.NoTrt_F |
| GATSL3   | 0.00773 | 0.42496 | 0.043 | 0.11 | 1 | HC_vs_MS.NoTrt_F |
| TSSC1    | 0.00776 | -0.3281 | 0.136 | 0.23 | 1 | HC_vs_MS.NoTrt_F |
| SNRNP48  | 0.00776 | -0.442  | 0.208 | 0.3  | 1 | HC_vs_MS.NoTrt_F |
| CLCN5    | 0.00779 | -0.4119 | 0.263 | 0.37 | 1 | HC_vs_MS.NoTrt_F |
| TMEM254  | 0.00781 | -0.6821 | 0.121 | 0.21 | 1 | HC_vs_MS.NoTrt_F |
| PIAS1    | 0.00781 | -0.3174 | 0.379 | 0.48 | 1 | HC_vs_MS.NoTrt_F |
| EBLN2    | 0.00782 | -1.2801 | 0.11  | 0.19 | 1 | HC_vs_MS.NoTrt_F |
| STX1B    | 0.00782 | 0.29509 | 0.298 | 0.4  | 1 | HC_vs_MS.NoTrt_F |
| XPO7     | 0.00783 | -0.5281 | 0.142 | 0.23 | 1 | HC_vs_MS.NoTrt_F |
| TTC31    | 0.00787 | -0.3339 | 0.246 | 0.35 | 1 | HC_vs_MS.NoTrt_F |
| VIPAS39  | 0.00787 | -0.9369 | 0.107 | 0.19 | 1 | HC_vs_MS.NoTrt_F |
| PRR3     | 0.00788 | 0.55456 | 0.855 | 0.8  | 1 | HC_vs_MS.NoTrt_F |

|            |         |         |       |      |   |                  |
|------------|---------|---------|-------|------|---|------------------|
| IFITM3     | 0.00788 | 1.08263 | 0.688 | 0.66 | 1 | HC_vs_MS.NoTrt_F |
| POC5       | 0.00789 | -0.8753 | 0.113 | 0.2  | 1 | HC_vs_MS.NoTrt_F |
| TRMT61A    | 0.0079  | 0.58382 | 0.058 | 0.13 | 1 | HC_vs_MS.NoTrt_F |
| GCC1       | 0.00792 | -1.4967 | 0.361 | 0.45 | 1 | HC_vs_MS.NoTrt_F |
| TOMM34     | 0.00793 | 0.4268  | 0.078 | 0.16 | 1 | HC_vs_MS.NoTrt_F |
| ZNF654     | 0.00794 | -1.0323 | 0.145 | 0.23 | 1 | HC_vs_MS.NoTrt_F |
| MANBA      | 0.00801 | -0.2907 | 0.22  | 0.32 | 1 | HC_vs_MS.NoTrt_F |
| EFHC1      | 0.00801 | 0.51658 | 0.922 | 0.87 | 1 | HC_vs_MS.NoTrt_F |
| RP11-49K24 | 0.00805 | -0.3947 | 0.165 | 0.27 | 1 | HC_vs_MS.NoTrt_F |
| CAMK2D     | 0.00806 | 0.63233 | 0.225 | 0.35 | 1 | HC_vs_MS.NoTrt_F |
| PUM3       | 0.00806 | -0.6787 | 0.191 | 0.29 | 1 | HC_vs_MS.NoTrt_F |
| EFCAB11    | 0.0081  | 0.39744 | 0.873 | 0.83 | 1 | HC_vs_MS.NoTrt_F |
| UBXN6      | 0.00811 | 0.38085 | 0.095 | 0.18 | 1 | HC_vs_MS.NoTrt_F |
| C15orf61   | 0.00812 | 0.38506 | 0.746 | 0.63 | 1 | HC_vs_MS.NoTrt_F |
| UBFD1      | 0.00814 | 0.94441 | 0.425 | 0.54 | 1 | HC_vs_MS.NoTrt_F |
| PSMC3      | 0.00815 | -0.5308 | 0.185 | 0.28 | 1 | HC_vs_MS.NoTrt_F |
| BCAS2      | 0.00816 | 0.31433 | 0.329 | 0.47 | 1 | HC_vs_MS.NoTrt_F |
| GPA33      | 0.00822 | 0.83829 | 0.101 | 0.18 | 1 | HC_vs_MS.NoTrt_F |
| ZNF554     | 0.00822 | 0.36123 | 0.968 | 0.96 | 1 | HC_vs_MS.NoTrt_F |
| CASP8      | 0.00828 | -0.3403 | 0.931 | 0.97 | 1 | HC_vs_MS.NoTrt_F |
| COQ10B     | 0.00828 | -0.5987 | 0.688 | 0.79 | 1 | HC_vs_MS.NoTrt_F |
| PEX11B     | 0.0083  | 0.85465 | 0.159 | 0.27 | 1 | HC_vs_MS.NoTrt_F |
| NF2        | 0.00832 | -0.51   | 0.821 | 0.85 | 1 | HC_vs_MS.NoTrt_F |
| RHOQ       | 0.00833 | 0.33981 | 0.09  | 0.17 | 1 | HC_vs_MS.NoTrt_F |
| BRAP       | 0.00834 | -0.6027 | 0.37  | 0.47 | 1 | HC_vs_MS.NoTrt_F |
| SPCS2      | 0.00834 | -0.3716 | 0.324 | 0.44 | 1 | HC_vs_MS.NoTrt_F |
| DYNC1I2    | 0.00835 | -0.6433 | 0.231 | 0.33 | 1 | HC_vs_MS.NoTrt_F |
| ACSL4      | 0.00838 | -0.6943 | 0.217 | 0.33 | 1 | HC_vs_MS.NoTrt_F |
| SDAD1      | 0.00842 | -0.3742 | 0.199 | 0.3  | 1 | HC_vs_MS.NoTrt_F |
| RANGRF     | 0.00844 | -0.3354 | 0.116 | 0.2  | 1 | HC_vs_MS.NoTrt_F |
| CSE1L      | 0.00844 | -0.4749 | 0.225 | 0.33 | 1 | HC_vs_MS.NoTrt_F |
| ZNF721     | 0.00846 | -0.3324 | 0.376 | 0.46 | 1 | HC_vs_MS.NoTrt_F |
| FAM134C    | 0.00848 | -0.6923 | 0.694 | 0.74 | 1 | HC_vs_MS.NoTrt_F |
| RNF187     | 0.00855 | -0.2849 | 0.095 | 0.18 | 1 | HC_vs_MS.NoTrt_F |
| LIPH       | 0.0086  | 0.36391 | 0.697 | 0.59 | 1 | HC_vs_MS.NoTrt_F |
| MRPL27     | 0.00863 | 0.29329 | 0.176 | 0.27 | 1 | HC_vs_MS.NoTrt_F |
| GALNT7     | 0.00863 | -0.4586 | 0.107 | 0.19 | 1 | HC_vs_MS.NoTrt_F |
| PQLC3      | 0.00864 | -0.6073 | 0.191 | 0.28 | 1 | HC_vs_MS.NoTrt_F |
| LYRM5      | 0.00867 | -0.7047 | 0.092 | 0.17 | 1 | HC_vs_MS.NoTrt_F |
| KIF20B     | 0.00867 | -0.2564 | 0.188 | 0.29 | 1 | HC_vs_MS.NoTrt_F |



|          |         |         |       |      |   |                  |
|----------|---------|---------|-------|------|---|------------------|
| KIAA1462 | 0.00871 | 0.47134 | 0.39  | 0.28 | 1 | HC_vs_MS.NoTrt_F |
| CD3EAP   | 0.00871 | 0.52013 | 0.89  | 0.77 | 1 | HC_vs_MS.NoTrt_F |
| WTIP     | 0.00874 | 0.3012  | 0.986 | 1    | 1 | HC_vs_MS.NoTrt_F |
| ELMOD2   | 0.00875 | 0.29563 | 0.095 | 0.18 | 1 | HC_vs_MS.NoTrt_F |
| NANOG    | 0.00878 | 0.31869 | 0.936 | 0.88 | 1 | HC_vs_MS.NoTrt_F |
| SLC25A25 | 0.00879 | -0.3616 | 0.121 | 0.21 | 1 | HC_vs_MS.NoTrt_F |
| GCLM     | 0.00879 | 0.26183 | 0.746 | 0.7  | 1 | HC_vs_MS.NoTrt_F |
| HNRNPUL2 | 0.00879 | 0.60188 | 0.124 | 0.21 | 1 | HC_vs_MS.NoTrt_F |
| RPS6KA4  | 0.0088  | 1.74679 | 0.043 | 0.11 | 1 | HC_vs_MS.NoTrt_F |
| GLYCTK   | 0.00884 | -0.4931 | 0.136 | 0.23 | 1 | HC_vs_MS.NoTrt_F |
| SLC25A1  | 0.00885 | 0.50378 | 0.11  | 0.19 | 1 | HC_vs_MS.NoTrt_F |
| FAM65B   | 0.00887 | -0.3783 | 0.673 | 0.74 | 1 | HC_vs_MS.NoTrt_F |
| FAM105A  | 0.00899 | -0.6742 | 0.28  | 0.38 | 1 | HC_vs_MS.NoTrt_F |
| MGMT     | 0.00899 | 0.41645 | 0.165 | 0.27 | 1 | HC_vs_MS.NoTrt_F |
| GGA2     | 0.00901 | -0.4478 | 0.72  | 0.8  | 1 | HC_vs_MS.NoTrt_F |
| SLC25A38 | 0.00904 | -0.4913 | 0.118 | 0.2  | 1 | HC_vs_MS.NoTrt_F |
| GPX7     | 0.00904 | 0.40716 | 0.081 | 0.16 | 1 | HC_vs_MS.NoTrt_F |
| CEPT1    | 0.00905 | -0.3958 | 0.361 | 0.45 | 1 | HC_vs_MS.NoTrt_F |
| SURF6    | 0.00906 | -0.4312 | 0.598 | 0.67 | 1 | HC_vs_MS.NoTrt_F |
| CAMKMT   | 0.00911 | 0.4078  | 0.286 | 0.4  | 1 | HC_vs_MS.NoTrt_F |
| TSC22D4  | 0.00919 | 0.36031 | 0.303 | 0.45 | 1 | HC_vs_MS.NoTrt_F |
| PEX7     | 0.00922 | 0.29857 | 0.171 | 0.27 | 1 | HC_vs_MS.NoTrt_F |
| ZNF30    | 0.00923 | 1.34315 | 0.078 | 0.15 | 1 | HC_vs_MS.NoTrt_F |
| ZDHHC3   | 0.00931 | -0.4094 | 0.532 | 0.63 | 1 | HC_vs_MS.NoTrt_F |
| ARHGEF15 | 0.00932 | 1.22181 | 0.454 | 0.34 | 1 | HC_vs_MS.NoTrt_F |
| TRADD    | 0.00935 | -0.2796 | 0.225 | 0.32 | 1 | HC_vs_MS.NoTrt_F |
| KDM7A    | 0.00935 | -0.5984 | 0.254 | 0.35 | 1 | HC_vs_MS.NoTrt_F |
| ING4     | 0.00937 | -0.3787 | 0.303 | 0.4  | 1 | HC_vs_MS.NoTrt_F |
| MGAT2    | 0.00939 | -0.2945 | 0.136 | 0.23 | 1 | HC_vs_MS.NoTrt_F |
| TAOK1    | 0.00939 | 0.59961 | 0.945 | 0.95 | 1 | HC_vs_MS.NoTrt_F |
| SIRT7    | 0.00943 | -0.367  | 0.419 | 0.51 | 1 | HC_vs_MS.NoTrt_F |
| BMI1     | 0.00944 | 0.56535 | 0.072 | 0.14 | 1 | HC_vs_MS.NoTrt_F |
| WDR81    | 0.00944 | 0.77053 | 0.084 | 0.16 | 1 | HC_vs_MS.NoTrt_F |
| IDH3B    | 0.00947 | 0.27659 | 0.237 | 0.35 | 1 | HC_vs_MS.NoTrt_F |
| FAM114A2 | 0.00949 | 0.25528 | 0.098 | 0.18 | 1 | HC_vs_MS.NoTrt_F |
| TIMM23   | 0.00951 | 0.27679 | 0.269 | 0.4  | 1 | HC_vs_MS.NoTrt_F |
| ZNF850   | 0.00952 | 0.28776 | 0.957 | 0.91 | 1 | HC_vs_MS.NoTrt_F |
| PTK2     | 0.00953 | 0.28005 | 0.951 | 0.96 | 1 | HC_vs_MS.NoTrt_F |
| ARF3     | 0.00953 | 0.26904 | 0.228 | 0.34 | 1 | HC_vs_MS.NoTrt_F |
| BICD1    | 0.00953 | -0.3893 | 0.118 | 0.2  | 1 | HC_vs_MS.NoTrt_F |

|            |         |         |       |      |   |                  |
|------------|---------|---------|-------|------|---|------------------|
| MAST2      | 0.00955 | 1.18038 | 0.055 | 0.12 | 1 | HC_vs_MS.NoTrt_F |
| CYLD       | 0.00955 | -0.2806 | 0.714 | 0.8  | 1 | HC_vs_MS.NoTrt_F |
| SWI5       | 0.00958 | -0.2883 | 0.084 | 0.16 | 1 | HC_vs_MS.NoTrt_F |
| TMEM208    | 0.0096  | 0.44697 | 0.179 | 0.29 | 1 | HC_vs_MS.NoTrt_F |
| MRPS36     | 0.00961 | 0.43996 | 0.171 | 0.28 | 1 | HC_vs_MS.NoTrt_F |
| PDZD11     | 0.00962 | -0.3408 | 0.121 | 0.2  | 1 | HC_vs_MS.NoTrt_F |
| ZFP36      | 0.00965 | 0.82832 | 0.673 | 0.68 | 1 | HC_vs_MS.NoTrt_F |
| TEFM       | 0.00965 | 0.42549 | 0.763 | 0.67 | 1 | HC_vs_MS.NoTrt_F |
| ACP2       | 0.0097  | 0.28661 | 0.084 | 0.16 | 1 | HC_vs_MS.NoTrt_F |
| RHNO1      | 0.0097  | 0.2859  | 0.74  | 0.64 | 1 | HC_vs_MS.NoTrt_F |
| CNTROB     | 0.00972 | -0.5562 | 0.197 | 0.29 | 1 | HC_vs_MS.NoTrt_F |
| AP006285.1 | 0.00977 | 0.44206 | 0.861 | 0.81 | 1 | HC_vs_MS.NoTrt_F |
| CCDC85B    | 0.00982 | 0.58096 | 0.153 | 0.25 | 1 | HC_vs_MS.NoTrt_F |
| KCNAB1     | 0.00985 | 0.44845 | 0.064 | 0.13 | 1 | HC_vs_MS.NoTrt_F |
| GBP1       | 0.00988 | -0.2536 | 0.289 | 0.4  | 1 | HC_vs_MS.NoTrt_F |
| TEX30      | 0.00998 | 0.51521 | 0.075 | 0.15 | 1 | HC_vs_MS.NoTrt_F |
| RPRD1A     | 0.01001 | -0.3628 | 0.179 | 0.27 | 1 | HC_vs_MS.NoTrt_F |
| MAP2K1     | 0.01003 | -0.5112 | 0.153 | 0.24 | 1 | HC_vs_MS.NoTrt_F |
| ZFYVE16    | 0.01006 | 0.34791 | 0.942 | 0.9  | 1 | HC_vs_MS.NoTrt_F |
| CTD-2369P2 | 0.01007 | 0.66496 | 0.084 | 0.16 | 1 | HC_vs_MS.NoTrt_F |
| C10orf67   | 0.01009 | 0.26215 | 0.269 | 0.38 | 1 | HC_vs_MS.NoTrt_F |
| PFDN4      | 0.0101  | 0.3146  | 0.098 | 0.18 | 1 | HC_vs_MS.NoTrt_F |
| CEP72      | 0.0101  | 0.91302 | 0.064 | 0.13 | 1 | HC_vs_MS.NoTrt_F |
| MTERF2     | 0.0101  | -0.6187 | 0.095 | 0.17 | 1 | HC_vs_MS.NoTrt_F |
| SEC14L2    | 0.01011 | -0.3324 | 0.165 | 0.25 | 1 | HC_vs_MS.NoTrt_F |
| RGL2       | 0.01014 | -0.7217 | 0.179 | 0.27 | 1 | HC_vs_MS.NoTrt_F |
| GLB1       | 0.01015 | -0.5287 | 0.272 | 0.37 | 1 | HC_vs_MS.NoTrt_F |
| ANAPC13    | 0.01018 | 0.27306 | 0.124 | 0.21 | 1 | HC_vs_MS.NoTrt_F |
| KNG1       | 0.01018 | 0.55814 | 0.263 | 0.37 | 1 | HC_vs_MS.NoTrt_F |
| PRKAB2     | 0.01029 | 0.83285 | 0.084 | 0.16 | 1 | HC_vs_MS.NoTrt_F |
| EEFSEC     | 0.01029 | -0.711  | 0.13  | 0.22 | 1 | HC_vs_MS.NoTrt_F |
| FOSB       | 0.0103  | 1.87414 | 0.474 | 0.4  | 1 | HC_vs_MS.NoTrt_F |
| SLC7A6OS   | 0.01033 | 0.37574 | 0.197 | 0.3  | 1 | HC_vs_MS.NoTrt_F |
| SREBF1     | 0.0104  | -1.2108 | 0.061 | 0.13 | 1 | HC_vs_MS.NoTrt_F |
| ZBTB3      | 0.01041 | 0.68462 | 0.85  | 0.84 | 1 | HC_vs_MS.NoTrt_F |
| ZNF845     | 0.01042 | 1.13705 | 0.711 | 0.59 | 1 | HC_vs_MS.NoTrt_F |
| CDC7       | 0.01044 | 0.3878  | 0.052 | 0.12 | 1 | HC_vs_MS.NoTrt_F |
| USP21      | 0.01047 | -0.4825 | 0.139 | 0.23 | 1 | HC_vs_MS.NoTrt_F |
| QTRT2      | 0.01048 | 0.46281 | 0.821 | 0.75 | 1 | HC_vs_MS.NoTrt_F |
| CCDC125    | 0.0105  | 0.3236  | 0.96  | 0.96 | 1 | HC_vs_MS.NoTrt_F |

|            |         |         |       |      |   |                  |
|------------|---------|---------|-------|------|---|------------------|
| TTC4       | 0.01053 | -0.7978 | 0.118 | 0.2  | 1 | HC_vs_MS.NoTrt_F |
| ZBTB44     | 0.01055 | -0.2789 | 0.303 | 0.4  | 1 | HC_vs_MS.NoTrt_F |
| SCAP       | 0.01056 | -0.3839 | 0.653 | 0.77 | 1 | HC_vs_MS.NoTrt_F |
| PPP2R3C    | 0.01057 | -0.2788 | 0.205 | 0.3  | 1 | HC_vs_MS.NoTrt_F |
| ZNF726     | 0.01068 | 0.4533  | 0.902 | 0.86 | 1 | HC_vs_MS.NoTrt_F |
| TWF1       | 0.01068 | -0.6562 | 0.11  | 0.19 | 1 | HC_vs_MS.NoTrt_F |
| ABHD14A-A1 | 0.01071 | -0.3661 | 0.049 | 0.11 | 1 | HC_vs_MS.NoTrt_F |
| CRAT       | 0.01074 | 0.78539 | 0.061 | 0.13 | 1 | HC_vs_MS.NoTrt_F |
| SLC9A7     | 0.01081 | 0.48796 | 0.977 | 0.92 | 1 | HC_vs_MS.NoTrt_F |
| MARK2      | 0.01081 | -0.3151 | 0.188 | 0.29 | 1 | HC_vs_MS.NoTrt_F |
| LPAR5      | 0.01081 | 0.89496 | 0.072 | 0.14 | 1 | HC_vs_MS.NoTrt_F |
| AMPH       | 0.01084 | -0.2821 | 0.168 | 0.26 | 1 | HC_vs_MS.NoTrt_F |
| RYBP       | 0.01085 | -0.5958 | 0.113 | 0.19 | 1 | HC_vs_MS.NoTrt_F |
| RNF13      | 0.01091 | -0.2666 | 0.199 | 0.3  | 1 | HC_vs_MS.NoTrt_F |
| PHLDA1     | 0.01096 | 1.5286  | 0.624 | 0.56 | 1 | HC_vs_MS.NoTrt_F |
| LMBRD2     | 0.01096 | -0.4243 | 0.13  | 0.22 | 1 | HC_vs_MS.NoTrt_F |
| KIF21B     | 0.01096 | 0.7914  | 0.434 | 0.55 | 1 | HC_vs_MS.NoTrt_F |
| FHOD1      | 0.01101 | 1.24147 | 0.194 | 0.3  | 1 | HC_vs_MS.NoTrt_F |
| KLRK1      | 0.01101 | 1.18846 | 0.711 | 0.64 | 1 | HC_vs_MS.NoTrt_F |
| TMEM126A   | 0.01102 | 0.37324 | 0.084 | 0.16 | 1 | HC_vs_MS.NoTrt_F |
| LTBP1      | 0.01102 | 0.7071  | 0.107 | 0.04 | 1 | HC_vs_MS.NoTrt_F |
| NCKIPSD    | 0.01102 | -0.9948 | 0.046 | 0.11 | 1 | HC_vs_MS.NoTrt_F |
| PBDC1      | 0.01103 | 0.5398  | 0.139 | 0.23 | 1 | HC_vs_MS.NoTrt_F |
| ZNF83      | 0.01103 | 0.32407 | 0.87  | 0.84 | 1 | HC_vs_MS.NoTrt_F |
| SIRT1      | 0.01104 | -0.4584 | 0.153 | 0.24 | 1 | HC_vs_MS.NoTrt_F |
| MRPL49     | 0.01105 | -0.4005 | 0.436 | 0.53 | 1 | HC_vs_MS.NoTrt_F |
| SPATA20    | 0.01105 | 0.42932 | 0.124 | 0.21 | 1 | HC_vs_MS.NoTrt_F |
| UBE2O      | 0.01105 | 0.53139 | 0.497 | 0.6  | 1 | HC_vs_MS.NoTrt_F |
| PHACTR4    | 0.01106 | 0.57585 | 0.948 | 0.98 | 1 | HC_vs_MS.NoTrt_F |
| AR         | 0.01111 | -0.5765 | 0.234 | 0.33 | 1 | HC_vs_MS.NoTrt_F |
| POLR3GL    | 0.01111 | 0.35626 | 0.243 | 0.37 | 1 | HC_vs_MS.NoTrt_F |
| TBC1D3L    | 0.01112 | 1.00836 | 0.095 | 0.17 | 1 | HC_vs_MS.NoTrt_F |
| P3H1       | 0.01113 | 0.41567 | 0.96  | 0.98 | 1 | HC_vs_MS.NoTrt_F |
| SH2D3C     | 0.01117 | -0.3452 | 0.257 | 0.35 | 1 | HC_vs_MS.NoTrt_F |
| CSGALNACT1 | 0.01118 | -0.4122 | 0.191 | 0.29 | 1 | HC_vs_MS.NoTrt_F |
| C6orf106   | 0.01119 | -0.6786 | 0.165 | 0.25 | 1 | HC_vs_MS.NoTrt_F |
| CSTF3      | 0.01124 | -1.2198 | 0.558 | 0.63 | 1 | HC_vs_MS.NoTrt_F |
| CRYBG3     | 0.01126 | -0.3105 | 0.09  | 0.17 | 1 | HC_vs_MS.NoTrt_F |
| EGLN1      | 0.01127 | -0.8734 | 0.364 | 0.45 | 1 | HC_vs_MS.NoTrt_F |
| NAAA       | 0.0113  | -0.4327 | 0.728 | 0.77 | 1 | HC_vs_MS.NoTrt_F |

|            |         |         |       |      |   |                  |
|------------|---------|---------|-------|------|---|------------------|
| PTPRA      | 0.01132 | 0.31422 | 0.188 | 0.29 | 1 | HC_vs_MS.NoTrt_F |
| CTSK       | 0.01138 | 0.84399 | 0.049 | 0.11 | 1 | HC_vs_MS.NoTrt_F |
| C6orf226   | 0.0114  | 0.34589 | 0.061 | 0.13 | 1 | HC_vs_MS.NoTrt_F |
| EHD3       | 0.01143 | 0.52032 | 0.098 | 0.18 | 1 | HC_vs_MS.NoTrt_F |
| GDAP1      | 0.01145 | 0.33885 | 0.092 | 0.17 | 1 | HC_vs_MS.NoTrt_F |
| MC1R       | 0.01146 | 0.40188 | 0.072 | 0.14 | 1 | HC_vs_MS.NoTrt_F |
| SLC19A1    | 0.01149 | -0.3403 | 0.087 | 0.16 | 1 | HC_vs_MS.NoTrt_F |
| CLMP       | 0.01155 | -0.8206 | 0.419 | 0.53 | 1 | HC_vs_MS.NoTrt_F |
| HADHB      | 0.01157 | -0.3958 | 0.555 | 0.62 | 1 | HC_vs_MS.NoTrt_F |
| ZNF202     | 0.01162 | 0.78965 | 0.049 | 0.11 | 1 | HC_vs_MS.NoTrt_F |
| SPOPL      | 0.01166 | 0.25516 | 0.084 | 0.16 | 1 | HC_vs_MS.NoTrt_F |
| CTR9       | 0.0117  | -0.3689 | 0.205 | 0.3  | 1 | HC_vs_MS.NoTrt_F |
| ACOX3      | 0.01171 | -0.3794 | 0.121 | 0.2  | 1 | HC_vs_MS.NoTrt_F |
| TMPO       | 0.01172 | -0.6064 | 0.572 | 0.65 | 1 | HC_vs_MS.NoTrt_F |
| SBF1       | 0.01174 | 0.60997 | 0.22  | 0.33 | 1 | HC_vs_MS.NoTrt_F |
| CENPH      | 0.01193 | -0.8103 | 0.324 | 0.41 | 1 | HC_vs_MS.NoTrt_F |
| HIST1H4I   | 0.01199 | -0.4297 | 0.049 | 0.11 | 1 | HC_vs_MS.NoTrt_F |
| FBL        | 0.012   | -0.6602 | 0.474 | 0.56 | 1 | HC_vs_MS.NoTrt_F |
| CTD-220702 | 0.01205 | -0.5701 | 0.168 | 0.25 | 1 | HC_vs_MS.NoTrt_F |
| CELSR3     | 0.01208 | 0.32408 | 0.113 | 0.19 | 1 | HC_vs_MS.NoTrt_F |
| TMCO6      | 0.01208 | -0.3381 | 0.526 | 0.62 | 1 | HC_vs_MS.NoTrt_F |
| SYNC       | 0.0121  | 0.31098 | 0.153 | 0.25 | 1 | HC_vs_MS.NoTrt_F |
| ZSCAN16    | 0.01212 | 0.39857 | 0.058 | 0.12 | 1 | HC_vs_MS.NoTrt_F |
| ZNF174     | 0.01213 | 1.42415 | 0.046 | 0.11 | 1 | HC_vs_MS.NoTrt_F |
| MED20      | 0.0122  | -0.9299 | 0.376 | 0.48 | 1 | HC_vs_MS.NoTrt_F |
| MIER3      | 0.01221 | 0.96044 | 0.061 | 0.13 | 1 | HC_vs_MS.NoTrt_F |
| HMGXB4     | 0.01223 | 0.31809 | 0.156 | 0.25 | 1 | HC_vs_MS.NoTrt_F |
| HEMK1      | 0.01226 | 0.28174 | 0.974 | 0.97 | 1 | HC_vs_MS.NoTrt_F |
| MEOX1      | 0.01227 | -0.4544 | 0.087 | 0.16 | 1 | HC_vs_MS.NoTrt_F |
| KDM6A      | 0.01241 | -0.2656 | 0.263 | 0.36 | 1 | HC_vs_MS.NoTrt_F |
| SLC38A5    | 0.01245 | -0.7822 | 0.092 | 0.17 | 1 | HC_vs_MS.NoTrt_F |
| TRAPPC13   | 0.01247 | 0.57985 | 0.156 | 0.24 | 1 | HC_vs_MS.NoTrt_F |
| WDR47      | 0.01248 | -0.7068 | 0.231 | 0.33 | 1 | HC_vs_MS.NoTrt_F |
| SPECC1     | 0.01253 | 0.55324 | 0.954 | 0.93 | 1 | HC_vs_MS.NoTrt_F |
| SLC23A2    | 0.01256 | 0.66816 | 0.179 | 0.28 | 1 | HC_vs_MS.NoTrt_F |
| MED26      | 0.01261 | 0.92319 | 0.124 | 0.22 | 1 | HC_vs_MS.NoTrt_F |
| HIST2H4B   | 0.01261 | 0.42419 | 0.176 | 0.27 | 1 | HC_vs_MS.NoTrt_F |
| GNL1       | 0.01264 | -0.492  | 0.118 | 0.2  | 1 | HC_vs_MS.NoTrt_F |
| ZNF672     | 0.01266 | 0.3246  | 0.246 | 0.35 | 1 | HC_vs_MS.NoTrt_F |
| LYPLAL1    | 0.01271 | 0.2793  | 0.092 | 0.17 | 1 | HC_vs_MS.NoTrt_F |

|         |         |         |       |      |   |                  |
|---------|---------|---------|-------|------|---|------------------|
| ALDH2   | 0.01272 | 0.36678 | 0.986 | 0.97 | 1 | HC_vs_MS.NoTrt_F |
| ESRRA   | 0.01273 | -0.2872 | 0.127 | 0.21 | 1 | HC_vs_MS.NoTrt_F |
| PGAM1   | 0.01281 | -0.2787 | 0.355 | 0.45 | 1 | HC_vs_MS.NoTrt_F |
| ALKBH3  | 0.01285 | 0.82147 | 0.113 | 0.19 | 1 | HC_vs_MS.NoTrt_F |
| VTI1B   | 0.01287 | 0.29245 | 0.28  | 0.38 | 1 | HC_vs_MS.NoTrt_F |
| AP3D1   | 0.01296 | 0.59949 | 0.168 | 0.27 | 1 | HC_vs_MS.NoTrt_F |
| ZBTB2   | 0.01297 | -0.5271 | 0.101 | 0.18 | 1 | HC_vs_MS.NoTrt_F |
| FBXO38  | 0.01299 | -0.7363 | 0.523 | 0.6  | 1 | HC_vs_MS.NoTrt_F |
| FUOM    | 0.01299 | 0.33359 | 0.046 | 0.11 | 1 | HC_vs_MS.NoTrt_F |
| DTNBP1  | 0.01301 | -0.5235 | 0.142 | 0.23 | 1 | HC_vs_MS.NoTrt_F |
| CENPB   | 0.01312 | 0.49332 | 0.046 | 0.11 | 1 | HC_vs_MS.NoTrt_F |
| PDAP1   | 0.0133  | -0.2501 | 0.428 | 0.53 | 1 | HC_vs_MS.NoTrt_F |
| SLMAP   | 0.01332 | -0.4521 | 0.772 | 0.83 | 1 | HC_vs_MS.NoTrt_F |
| ADGRV1  | 0.01333 | -0.4718 | 0.211 | 0.3  | 1 | HC_vs_MS.NoTrt_F |
| ATOX1   | 0.01333 | 1.01938 | 0.277 | 0.39 | 1 | HC_vs_MS.NoTrt_F |
| LYRM7   | 0.01333 | 0.41787 | 0.96  | 0.9  | 1 | HC_vs_MS.NoTrt_F |
| BIVM    | 0.01335 | 0.48512 | 0.332 | 0.44 | 1 | HC_vs_MS.NoTrt_F |
| LMNA    | 0.01338 | 0.75543 | 0.801 | 0.76 | 1 | HC_vs_MS.NoTrt_F |
| VAPB    | 0.01339 | -0.8404 | 0.217 | 0.3  | 1 | HC_vs_MS.NoTrt_F |
| C3      | 0.01345 | 0.36765 | 0.968 | 0.93 | 1 | HC_vs_MS.NoTrt_F |
| EPHA4   | 0.01353 | -1.3896 | 0.237 | 0.34 | 1 | HC_vs_MS.NoTrt_F |
| FAM227B | 0.01361 | -0.5412 | 0.384 | 0.49 | 1 | HC_vs_MS.NoTrt_F |
| NUDT22  | 0.01361 | -0.4033 | 0.676 | 0.71 | 1 | HC_vs_MS.NoTrt_F |
| INVS    | 0.01364 | -0.9113 | 0.173 | 0.26 | 1 | HC_vs_MS.NoTrt_F |
| CASP4   | 0.01367 | -0.3583 | 0.361 | 0.46 | 1 | HC_vs_MS.NoTrt_F |
| BCS1L   | 0.01368 | 0.41917 | 0.09  | 0.16 | 1 | HC_vs_MS.NoTrt_F |
| PPCS    | 0.0137  | -0.2795 | 0.367 | 0.48 | 1 | HC_vs_MS.NoTrt_F |
| HTT     | 0.01372 | -0.2885 | 0.266 | 0.37 | 1 | HC_vs_MS.NoTrt_F |
| TNIP3   | 0.01387 | 0.8967  | 0.512 | 0.64 | 1 | HC_vs_MS.NoTrt_F |
| DLGAP4  | 0.0139  | -0.2879 | 0.257 | 0.36 | 1 | HC_vs_MS.NoTrt_F |
| MIPEP   | 0.01392 | 0.34368 | 0.078 | 0.15 | 1 | HC_vs_MS.NoTrt_F |
| SLFN13  | 0.01396 | 0.99262 | 0.731 | 0.67 | 1 | HC_vs_MS.NoTrt_F |
| PDE6D   | 0.01396 | -0.4991 | 0.147 | 0.23 | 1 | HC_vs_MS.NoTrt_F |
| DRAXIN  | 0.01397 | 0.29286 | 0.896 | 0.85 | 1 | HC_vs_MS.NoTrt_F |
| COL1A2  | 0.01398 | 1.72866 | 0.532 | 0.44 | 1 | HC_vs_MS.NoTrt_F |
| CCDC43  | 0.014   | -0.5473 | 0.113 | 0.19 | 1 | HC_vs_MS.NoTrt_F |
| COL15A1 | 0.01407 | 1.5417  | 0.425 | 0.32 | 1 | HC_vs_MS.NoTrt_F |
| TRMT61B | 0.01408 | 0.79104 | 0.133 | 0.22 | 1 | HC_vs_MS.NoTrt_F |
| AGAP2   | 0.01411 | 0.26688 | 0.225 | 0.33 | 1 | HC_vs_MS.NoTrt_F |
| MEFV    | 0.01421 | 0.27724 | 0.841 | 0.79 | 1 | HC_vs_MS.NoTrt_F |

|            |         |         |       |      |   |                  |
|------------|---------|---------|-------|------|---|------------------|
| STK35      | 0.01422 | 1.39934 | 0.081 | 0.16 | 1 | HC_vs_MS.NoTrt_F |
| ADAMTSL3   | 0.01423 | 0.52164 | 0.98  | 0.98 | 1 | HC_vs_MS.NoTrt_F |
| NBPF11     | 0.01425 | 0.3406  | 0.286 | 0.4  | 1 | HC_vs_MS.NoTrt_F |
| LGR4       | 0.01439 | 0.46972 | 0.075 | 0.14 | 1 | HC_vs_MS.NoTrt_F |
| VPS37A     | 0.01445 | 0.27736 | 0.191 | 0.28 | 1 | HC_vs_MS.NoTrt_F |
| PAFAH2     | 0.01449 | -0.4275 | 0.566 | 0.64 | 1 | HC_vs_MS.NoTrt_F |
| VCIPI1     | 0.01453 | -0.7136 | 0.439 | 0.53 | 1 | HC_vs_MS.NoTrt_F |
| GBE1       | 0.01453 | 0.44399 | 0.066 | 0.13 | 1 | HC_vs_MS.NoTrt_F |
| PUDP       | 0.01454 | -0.4454 | 0.113 | 0.19 | 1 | HC_vs_MS.NoTrt_F |
| PAFAH1B2   | 0.01455 | -0.2872 | 0.91  | 0.95 | 1 | HC_vs_MS.NoTrt_F |
| PCYOX1L    | 0.01462 | 0.46459 | 0.11  | 0.19 | 1 | HC_vs_MS.NoTrt_F |
| ENGASE     | 0.01466 | 0.87879 | 0.084 | 0.16 | 1 | HC_vs_MS.NoTrt_F |
| TRAF7      | 0.01469 | 0.77002 | 0.15  | 0.24 | 1 | HC_vs_MS.NoTrt_F |
| NOD1       | 0.01473 | -0.4895 | 0.13  | 0.21 | 1 | HC_vs_MS.NoTrt_F |
| MARS       | 0.01477 | -0.5013 | 0.419 | 0.5  | 1 | HC_vs_MS.NoTrt_F |
| GPRC5A     | 0.0148  | 0.28322 | 0.723 | 0.66 | 1 | HC_vs_MS.NoTrt_F |
| IKZF4      | 0.01481 | 0.94649 | 0.211 | 0.32 | 1 | HC_vs_MS.NoTrt_F |
| ACAD9      | 0.01484 | -0.4829 | 0.338 | 0.42 | 1 | HC_vs_MS.NoTrt_F |
| ABC13-4748 | 0.01484 | 0.56155 | 0.101 | 0.18 | 1 | HC_vs_MS.NoTrt_F |
| SRRM1      | 0.01487 | -0.3339 | 0.919 | 0.9  | 1 | HC_vs_MS.NoTrt_F |
| POLR3F     | 0.0149  | -0.3374 | 0.087 | 0.16 | 1 | HC_vs_MS.NoTrt_F |
| TARS       | 0.0149  | -0.3705 | 0.257 | 0.34 | 1 | HC_vs_MS.NoTrt_F |
| GXYLT1     | 0.01498 | -0.4102 | 0.434 | 0.53 | 1 | HC_vs_MS.NoTrt_F |
| LRRFIP2    | 0.01498 | -0.4611 | 0.766 | 0.81 | 1 | HC_vs_MS.NoTrt_F |
| SGSM3      | 0.01499 | 0.28163 | 0.223 | 0.33 | 1 | HC_vs_MS.NoTrt_F |
| FUCA1      | 0.01499 | 0.68302 | 0.078 | 0.15 | 1 | HC_vs_MS.NoTrt_F |
| JADE1      | 0.015   | -0.602  | 0.364 | 0.46 | 1 | HC_vs_MS.NoTrt_F |
| MAMLD1     | 0.01502 | 0.4963  | 0.194 | 0.29 | 1 | HC_vs_MS.NoTrt_F |
| DGCR2      | 0.01503 | -0.2693 | 0.257 | 0.36 | 1 | HC_vs_MS.NoTrt_F |
| CDC27      | 0.01505 | -0.3716 | 0.474 | 0.57 | 1 | HC_vs_MS.NoTrt_F |
| CDC23      | 0.01505 | -0.2741 | 0.116 | 0.19 | 1 | HC_vs_MS.NoTrt_F |
| GK         | 0.01508 | -0.3646 | 0.228 | 0.34 | 1 | HC_vs_MS.NoTrt_F |
| DISP2      | 0.01508 | 0.34538 | 0.934 | 0.93 | 1 | HC_vs_MS.NoTrt_F |
| PAPD5      | 0.01508 | -0.7321 | 0.185 | 0.28 | 1 | HC_vs_MS.NoTrt_F |
| DHRS3      | 0.01511 | 1.34215 | 0.338 | 0.25 | 1 | HC_vs_MS.NoTrt_F |
| RETSAT     | 0.01514 | -0.4203 | 0.179 | 0.28 | 1 | HC_vs_MS.NoTrt_F |
| ADD3       | 0.01518 | -0.45   | 0.827 | 0.82 | 1 | HC_vs_MS.NoTrt_F |
| ZSCAN32    | 0.01521 | -0.3065 | 0.246 | 0.33 | 1 | HC_vs_MS.NoTrt_F |
| LSAMP      | 0.01525 | 0.47644 | 0.566 | 0.5  | 1 | HC_vs_MS.NoTrt_F |
| NPTN       | 0.01528 | -0.2612 | 0.338 | 0.43 | 1 | HC_vs_MS.NoTrt_F |

|            |         |         |       |      |   |                  |
|------------|---------|---------|-------|------|---|------------------|
| GMFB       | 0.01529 | -0.362  | 0.124 | 0.2  | 1 | HC_vs_MS.NoTrt_F |
| ZNF32      | 0.01531 | 0.334   | 0.107 | 0.18 | 1 | HC_vs_MS.NoTrt_F |
| ABCC3      | 0.01531 | 0.32388 | 0.861 | 0.83 | 1 | HC_vs_MS.NoTrt_F |
| PCMT1      | 0.01532 | -0.5008 | 0.228 | 0.32 | 1 | HC_vs_MS.NoTrt_F |
| SLC44A1    | 0.01537 | -0.5671 | 0.639 | 0.71 | 1 | HC_vs_MS.NoTrt_F |
| VWA5A      | 0.01538 | -0.2645 | 0.09  | 0.16 | 1 | HC_vs_MS.NoTrt_F |
| TPH2       | 0.01541 | 0.38602 | 0.711 | 0.68 | 1 | HC_vs_MS.NoTrt_F |
| C19orf54   | 0.01549 | -0.608  | 0.486 | 0.58 | 1 | HC_vs_MS.NoTrt_F |
| ZNF680     | 0.01549 | 0.46401 | 0.139 | 0.22 | 1 | HC_vs_MS.NoTrt_F |
| EIF3J      | 0.01553 | 0.6733  | 0.202 | 0.32 | 1 | HC_vs_MS.NoTrt_F |
| RELA       | 0.01554 | -0.3731 | 0.214 | 0.31 | 1 | HC_vs_MS.NoTrt_F |
| GPR160     | 0.01556 | 0.30311 | 0.055 | 0.12 | 1 | HC_vs_MS.NoTrt_F |
| SCO2       | 0.01565 | 0.75722 | 0.078 | 0.15 | 1 | HC_vs_MS.NoTrt_F |
| ZNF275     | 0.01565 | -0.3197 | 0.072 | 0.14 | 1 | HC_vs_MS.NoTrt_F |
| SETMAR     | 0.01565 | -0.4405 | 0.332 | 0.45 | 1 | HC_vs_MS.NoTrt_F |
| PEMT       | 0.0157  | 0.49659 | 0.084 | 0.16 | 1 | HC_vs_MS.NoTrt_F |
| PSMC4      | 0.01571 | -0.4623 | 0.543 | 0.6  | 1 | HC_vs_MS.NoTrt_F |
| ABCC2      | 0.01571 | 0.31547 | 0.514 | 0.66 | 1 | HC_vs_MS.NoTrt_F |
| BAG4       | 0.01573 | 0.29759 | 0.223 | 0.33 | 1 | HC_vs_MS.NoTrt_F |
| EMC8       | 0.01582 | -0.9105 | 0.208 | 0.29 | 1 | HC_vs_MS.NoTrt_F |
| SNRPC      | 0.01586 | 0.38227 | 0.272 | 0.39 | 1 | HC_vs_MS.NoTrt_F |
| SAMD9L     | 0.01589 | -0.3013 | 0.246 | 0.34 | 1 | HC_vs_MS.NoTrt_F |
| MKKS       | 0.0159  | -0.6266 | 0.104 | 0.18 | 1 | HC_vs_MS.NoTrt_F |
| UPF1       | 0.016   | 0.78999 | 0.13  | 0.21 | 1 | HC_vs_MS.NoTrt_F |
| NAV1       | 0.01601 | 0.56542 | 0.908 | 0.89 | 1 | HC_vs_MS.NoTrt_F |
| SUMO4      | 0.01603 | 1.4947  | 0.049 | 0.11 | 1 | HC_vs_MS.NoTrt_F |
| KIR3DX1    | 0.01608 | 0.31334 | 0.931 | 0.92 | 1 | HC_vs_MS.NoTrt_F |
| KCNE4      | 0.01618 | 0.28472 | 0.919 | 0.87 | 1 | HC_vs_MS.NoTrt_F |
| LGMN       | 0.01624 | 0.3168  | 0.971 | 0.96 | 1 | HC_vs_MS.NoTrt_F |
| ROCK2      | 0.01627 | 0.44045 | 0.471 | 0.59 | 1 | HC_vs_MS.NoTrt_F |
| SURF4      | 0.01628 | 0.33403 | 0.306 | 0.44 | 1 | HC_vs_MS.NoTrt_F |
| NPC2       | 0.01629 | 0.3233  | 0.15  | 0.24 | 1 | HC_vs_MS.NoTrt_F |
| ANKHD1-EIF | 0.01631 | 0.96491 | 0.064 | 0.13 | 1 | HC_vs_MS.NoTrt_F |
| RAB3GAP1   | 0.01631 | -0.3789 | 0.402 | 0.49 | 1 | HC_vs_MS.NoTrt_F |
| ZNF821     | 0.01632 | 0.98896 | 0.084 | 0.16 | 1 | HC_vs_MS.NoTrt_F |
| KLF12      | 0.01633 | -0.3142 | 0.376 | 0.5  | 1 | HC_vs_MS.NoTrt_F |
| PPM1L      | 0.01636 | -1.1112 | 0.246 | 0.33 | 1 | HC_vs_MS.NoTrt_F |
| ZNF783     | 0.0164  | 0.34666 | 0.442 | 0.52 | 1 | HC_vs_MS.NoTrt_F |
| MS4A7      | 0.01644 | 0.36502 | 0.829 | 0.8  | 1 | HC_vs_MS.NoTrt_F |
| UBLCP1     | 0.01644 | 0.64802 | 0.214 | 0.31 | 1 | HC_vs_MS.NoTrt_F |

|             |         |         |       |      |   |                  |
|-------------|---------|---------|-------|------|---|------------------|
| SEMA3G      | 0.01654 | -0.54   | 0.049 | 0.11 | 1 | HC_vs_MS.NoTrt_F |
| CENPT       | 0.01658 | -0.564  | 0.269 | 0.37 | 1 | HC_vs_MS.NoTrt_F |
| ATG9A       | 0.01659 | 0.34127 | 0.116 | 0.19 | 1 | HC_vs_MS.NoTrt_F |
| FAM91A1     | 0.01659 | -0.6854 | 0.344 | 0.45 | 1 | HC_vs_MS.NoTrt_F |
| EPHX1       | 0.01664 | 0.25407 | 0.107 | 0.18 | 1 | HC_vs_MS.NoTrt_F |
| ADH7        | 0.01671 | -0.369  | 0.188 | 0.28 | 1 | HC_vs_MS.NoTrt_F |
| SCGB2B2     | 0.01672 | 1.33156 | 0.066 | 0.13 | 1 | HC_vs_MS.NoTrt_F |
| RCS1        | 0.01677 | -0.3264 | 0.936 | 0.96 | 1 | HC_vs_MS.NoTrt_F |
| RPL7L1      | 0.01679 | 0.26575 | 1     | 1    | 1 | HC_vs_MS.NoTrt_F |
| CCDC22      | 0.01679 | -0.3411 | 0.162 | 0.25 | 1 | HC_vs_MS.NoTrt_F |
| PARVG       | 0.01683 | 0.25008 | 0.315 | 0.44 | 1 | HC_vs_MS.NoTrt_F |
| BDH2        | 0.01693 | -0.5139 | 0.234 | 0.32 | 1 | HC_vs_MS.NoTrt_F |
| RCE1        | 0.01699 | -0.6472 | 0.136 | 0.21 | 1 | HC_vs_MS.NoTrt_F |
| TIMM8B      | 0.01706 | -0.4281 | 0.118 | 0.19 | 1 | HC_vs_MS.NoTrt_F |
| BOLA1       | 0.01708 | 0.6415  | 0.072 | 0.14 | 1 | HC_vs_MS.NoTrt_F |
| STRADB      | 0.01708 | -0.4406 | 0.101 | 0.17 | 1 | HC_vs_MS.NoTrt_F |
| EEF2KMT     | 0.01709 | 0.39699 | 0.104 | 0.18 | 1 | HC_vs_MS.NoTrt_F |
| ZNF143      | 0.0171  | -0.2732 | 0.15  | 0.23 | 1 | HC_vs_MS.NoTrt_F |
| AGFG2       | 0.01711 | 0.26337 | 0.355 | 0.46 | 1 | HC_vs_MS.NoTrt_F |
| FRG2C       | 0.01713 | 0.89533 | 0.194 | 0.29 | 1 | HC_vs_MS.NoTrt_F |
| MMP24       | 0.01714 | 0.40263 | 0.095 | 0.17 | 1 | HC_vs_MS.NoTrt_F |
| TOP3B       | 0.01714 | 0.6917  | 0.15  | 0.24 | 1 | HC_vs_MS.NoTrt_F |
| SLC35G1     | 0.01718 | -0.3776 | 0.176 | 0.25 | 1 | HC_vs_MS.NoTrt_F |
| ANP32A      | 0.01724 | -0.2559 | 0.312 | 0.4  | 1 | HC_vs_MS.NoTrt_F |
| PSMD4       | 0.01727 | -0.3967 | 0.694 | 0.75 | 1 | HC_vs_MS.NoTrt_F |
| PEX19       | 0.01731 | 0.25472 | 0.156 | 0.24 | 1 | HC_vs_MS.NoTrt_F |
| RP11-949J7. | 0.01731 | -1.3165 | 0.087 | 0.16 | 1 | HC_vs_MS.NoTrt_F |
| ATF6        | 0.01734 | 0.44149 | 0.283 | 0.38 | 1 | HC_vs_MS.NoTrt_F |
| FUT8        | 0.01737 | 0.43061 | 1     | 0.99 | 1 | HC_vs_MS.NoTrt_F |
| HEATR1      | 0.0175  | -0.5564 | 0.202 | 0.3  | 1 | HC_vs_MS.NoTrt_F |
| SMYD3       | 0.0175  | -0.406  | 0.234 | 0.33 | 1 | HC_vs_MS.NoTrt_F |
| LIN7C       | 0.01752 | -0.253  | 0.347 | 0.45 | 1 | HC_vs_MS.NoTrt_F |
| NCF2        | 0.01759 | 0.4456  | 0.064 | 0.13 | 1 | HC_vs_MS.NoTrt_F |
| MT-CYB      | 0.01775 | 0.58309 | 0.792 | 0.79 | 1 | HC_vs_MS.NoTrt_F |
| FARP2       | 0.01776 | -1.3256 | 0.376 | 0.46 | 1 | HC_vs_MS.NoTrt_F |
| FAR1        | 0.01776 | 0.29609 | 0.104 | 0.18 | 1 | HC_vs_MS.NoTrt_F |
| LRRFIP1     | 0.0178  | 0.3876  | 0.997 | 1    | 1 | HC_vs_MS.NoTrt_F |
| DPM3        | 0.01782 | 0.42765 | 0.066 | 0.13 | 1 | HC_vs_MS.NoTrt_F |
| GALNT8      | 0.01786 | 0.38987 | 0.052 | 0.11 | 1 | HC_vs_MS.NoTrt_F |
| ALG3        | 0.01787 | 0.35786 | 0.173 | 0.27 | 1 | HC_vs_MS.NoTrt_F |



|            |         |         |       |      |   |                  |
|------------|---------|---------|-------|------|---|------------------|
| PLEKHA4    | 0.01788 | -0.3144 | 0.081 | 0.15 | 1 | HC_vs_MS.NoTrt_F |
| AL078584.1 | 0.01789 | -0.5562 | 0.471 | 0.53 | 1 | HC_vs_MS.NoTrt_F |
| FAM50A     | 0.01795 | 0.43136 | 0.142 | 0.22 | 1 | HC_vs_MS.NoTrt_F |
| NUDT16L1   | 0.01797 | 0.27801 | 0.153 | 0.24 | 1 | HC_vs_MS.NoTrt_F |
| RPS6KB1    | 0.01798 | -0.3861 | 0.87  | 0.95 | 1 | HC_vs_MS.NoTrt_F |
| LLNLF-187D | 0.01805 | 0.31058 | 0.659 | 0.54 | 1 | HC_vs_MS.NoTrt_F |
| REL        | 0.0181  | 0.62002 | 0.983 | 0.97 | 1 | HC_vs_MS.NoTrt_F |
| PLEKHM2    | 0.01817 | -0.6047 | 0.049 | 0.11 | 1 | HC_vs_MS.NoTrt_F |
| SLC25A53   | 0.01817 | 0.31868 | 0.483 | 0.59 | 1 | HC_vs_MS.NoTrt_F |
| KCTD10     | 0.01818 | 1.15361 | 0.483 | 0.37 | 1 | HC_vs_MS.NoTrt_F |
| PGM3       | 0.01823 | 0.7831  | 0.263 | 0.37 | 1 | HC_vs_MS.NoTrt_F |
| AC068533.7 | 0.01825 | 0.38477 | 0.052 | 0.11 | 1 | HC_vs_MS.NoTrt_F |
| PLCG2      | 0.01826 | 0.9376  | 0.113 | 0.19 | 1 | HC_vs_MS.NoTrt_F |
| ZNF223     | 0.01826 | 0.43716 | 0.104 | 0.18 | 1 | HC_vs_MS.NoTrt_F |
| DCAF12     | 0.0183  | -0.5425 | 0.179 | 0.27 | 1 | HC_vs_MS.NoTrt_F |
| NDUFB5     | 0.01833 | -0.6783 | 0.702 | 0.75 | 1 | HC_vs_MS.NoTrt_F |
| HDHD3      | 0.01833 | -0.2558 | 0.194 | 0.28 | 1 | HC_vs_MS.NoTrt_F |
| PKP2       | 0.01836 | 0.42461 | 0.676 | 0.58 | 1 | HC_vs_MS.NoTrt_F |
| VAMP3      | 0.01846 | -0.3594 | 0.353 | 0.44 | 1 | HC_vs_MS.NoTrt_F |
| ZDHHC6     | 0.01853 | -0.2616 | 0.188 | 0.28 | 1 | HC_vs_MS.NoTrt_F |
| PDK2       | 0.01855 | -0.4097 | 0.292 | 0.39 | 1 | HC_vs_MS.NoTrt_F |
| DERL1      | 0.01864 | -0.291  | 0.529 | 0.58 | 1 | HC_vs_MS.NoTrt_F |
| MTMR2      | 0.01878 | -0.3533 | 0.208 | 0.29 | 1 | HC_vs_MS.NoTrt_F |
| FNTB       | 0.01878 | -0.5717 | 0.162 | 0.24 | 1 | HC_vs_MS.NoTrt_F |
| AGFG1      | 0.01879 | -0.4818 | 0.095 | 0.17 | 1 | HC_vs_MS.NoTrt_F |
| ISYNA1     | 0.01892 | 0.43067 | 0.11  | 0.18 | 1 | HC_vs_MS.NoTrt_F |
| ALDOC      | 0.01892 | 0.42806 | 0.095 | 0.17 | 1 | HC_vs_MS.NoTrt_F |
| CLSTN1     | 0.01894 | 0.25395 | 0.188 | 0.28 | 1 | HC_vs_MS.NoTrt_F |
| UTP14C     | 0.01897 | -0.9396 | 0.194 | 0.28 | 1 | HC_vs_MS.NoTrt_F |
| LRG1       | 0.019   | 0.32195 | 0.835 | 0.76 | 1 | HC_vs_MS.NoTrt_F |
| PHLPP2     | 0.019   | 0.30465 | 0.818 | 0.75 | 1 | HC_vs_MS.NoTrt_F |
| BMT2       | 0.019   | 0.76215 | 0.136 | 0.22 | 1 | HC_vs_MS.NoTrt_F |
| ETV7       | 0.01902 | -0.5968 | 0.058 | 0.12 | 1 | HC_vs_MS.NoTrt_F |
| CXCR5      | 0.01906 | 0.29259 | 0.153 | 0.24 | 1 | HC_vs_MS.NoTrt_F |
| NCKAP1     | 0.01924 | 0.77787 | 0.743 | 0.65 | 1 | HC_vs_MS.NoTrt_F |
| ZNF512     | 0.01926 | -0.2943 | 0.142 | 0.22 | 1 | HC_vs_MS.NoTrt_F |
| SEC24D     | 0.01931 | -0.3417 | 0.526 | 0.6  | 1 | HC_vs_MS.NoTrt_F |
| RSAD1      | 0.01934 | 0.45258 | 0.113 | 0.19 | 1 | HC_vs_MS.NoTrt_F |
| SMARCA5    | 0.01937 | -0.2826 | 0.384 | 0.49 | 1 | HC_vs_MS.NoTrt_F |
| ABCA3      | 0.01946 | 0.27836 | 0.078 | 0.14 | 1 | HC_vs_MS.NoTrt_F |

|             |         |         |       |      |   |                  |
|-------------|---------|---------|-------|------|---|------------------|
| TMCC1       | 0.01948 | 0.33687 | 0.118 | 0.19 | 1 | HC_vs_MS.NoTrt_F |
| APOD        | 0.01949 | 2.30074 | 0.35  | 0.26 | 1 | HC_vs_MS.NoTrt_F |
| SP4         | 0.01951 | -0.6904 | 0.448 | 0.5  | 1 | HC_vs_MS.NoTrt_F |
| CAPN12      | 0.01952 | 0.93599 | 0.613 | 0.54 | 1 | HC_vs_MS.NoTrt_F |
| MFSD13A     | 0.01955 | -0.5909 | 0.777 | 0.85 | 1 | HC_vs_MS.NoTrt_F |
| DDX10       | 0.01956 | -0.8294 | 0.694 | 0.75 | 1 | HC_vs_MS.NoTrt_F |
| PIGK        | 0.01958 | -0.5249 | 0.136 | 0.21 | 1 | HC_vs_MS.NoTrt_F |
| STEAP2      | 0.01958 | 0.29282 | 0.78  | 0.73 | 1 | HC_vs_MS.NoTrt_F |
| VPS54       | 0.01963 | -0.6261 | 0.419 | 0.53 | 1 | HC_vs_MS.NoTrt_F |
| C21orf2     | 0.01966 | -0.2673 | 0.185 | 0.27 | 1 | HC_vs_MS.NoTrt_F |
| SLC39A11    | 0.0197  | 0.39539 | 0.272 | 0.38 | 1 | HC_vs_MS.NoTrt_F |
| LCMT1       | 0.01972 | 0.29064 | 0.202 | 0.3  | 1 | HC_vs_MS.NoTrt_F |
| ZMYM5       | 0.01976 | -0.3956 | 0.292 | 0.38 | 1 | HC_vs_MS.NoTrt_F |
| CYTH2       | 0.01981 | 0.43795 | 0.676 | 0.77 | 1 | HC_vs_MS.NoTrt_F |
| IMPA2       | 0.01989 | 0.28782 | 0.87  | 0.82 | 1 | HC_vs_MS.NoTrt_F |
| CSNK1G3     | 0.0199  | -0.2693 | 0.133 | 0.22 | 1 | HC_vs_MS.NoTrt_F |
| BLK         | 0.01993 | 0.74156 | 0.069 | 0.13 | 1 | HC_vs_MS.NoTrt_F |
| RPE         | 0.01994 | -0.3849 | 0.353 | 0.45 | 1 | HC_vs_MS.NoTrt_F |
| NCAPD3      | 0.01995 | 0.38038 | 0.11  | 0.18 | 1 | HC_vs_MS.NoTrt_F |
| AQP7        | 0.01995 | 1.05078 | 0.147 | 0.08 | 1 | HC_vs_MS.NoTrt_F |
| ZNF692      | 0.02007 | 0.31518 | 0.13  | 0.21 | 1 | HC_vs_MS.NoTrt_F |
| PTBP2       | 0.02015 | -0.4525 | 0.682 | 0.72 | 1 | HC_vs_MS.NoTrt_F |
| CTC-432M1!  | 0.02027 | 1.27432 | 0.061 | 0.12 | 1 | HC_vs_MS.NoTrt_F |
| FAM199X     | 0.02044 | 1.23167 | 0.072 | 0.14 | 1 | HC_vs_MS.NoTrt_F |
| SLC25A37    | 0.02045 | 0.64431 | 0.65  | 0.8  | 1 | HC_vs_MS.NoTrt_F |
| CTC-479C5.1 | 0.02045 | -0.547  | 0.601 | 0.63 | 1 | HC_vs_MS.NoTrt_F |
| PYGO2       | 0.02053 | -0.6085 | 0.173 | 0.25 | 1 | HC_vs_MS.NoTrt_F |
| VPS4A       | 0.02055 | -0.3256 | 0.688 | 0.75 | 1 | HC_vs_MS.NoTrt_F |
| ORC3        | 0.02057 | 0.51305 | 0.191 | 0.28 | 1 | HC_vs_MS.NoTrt_F |
| ABCD2       | 0.02059 | 0.32709 | 0.118 | 0.19 | 1 | HC_vs_MS.NoTrt_F |
| WNT10A      | 0.0206  | 1.08854 | 0.159 | 0.25 | 1 | HC_vs_MS.NoTrt_F |
| KIAA1147    | 0.02061 | -0.2686 | 0.124 | 0.2  | 1 | HC_vs_MS.NoTrt_F |
| HINT2       | 0.02065 | 0.46784 | 0.107 | 0.18 | 1 | HC_vs_MS.NoTrt_F |
| SLC16A4     | 0.02067 | 0.49692 | 0.749 | 0.69 | 1 | HC_vs_MS.NoTrt_F |
| MRPL24      | 0.02068 | -0.3324 | 0.145 | 0.22 | 1 | HC_vs_MS.NoTrt_F |
| HAUS4       | 0.0207  | -0.2697 | 0.156 | 0.24 | 1 | HC_vs_MS.NoTrt_F |
| LINC00959   | 0.02074 | -0.8013 | 0.147 | 0.23 | 1 | HC_vs_MS.NoTrt_F |
| CARMIL2     | 0.02074 | 1.58046 | 0.095 | 0.17 | 1 | HC_vs_MS.NoTrt_F |
| GJB7        | 0.02074 | 0.66073 | 0.09  | 0.16 | 1 | HC_vs_MS.NoTrt_F |
| LSM1        | 0.02079 | 0.29321 | 0.162 | 0.25 | 1 | HC_vs_MS.NoTrt_F |

|          |         |         |       |      |   |                  |
|----------|---------|---------|-------|------|---|------------------|
| CIDEB    | 0.02082 | 0.61495 | 0.072 | 0.14 | 1 | HC_vs_MS.NoTrt_F |
| ZC2HC1A  | 0.0209  | 0.29994 | 0.22  | 0.32 | 1 | HC_vs_MS.NoTrt_F |
| INO80E   | 0.02092 | -0.3564 | 0.22  | 0.3  | 1 | HC_vs_MS.NoTrt_F |
| ZNF394   | 0.02096 | -0.5022 | 0.509 | 0.61 | 1 | HC_vs_MS.NoTrt_F |
| CCDC7    | 0.02096 | 0.78983 | 0.191 | 0.29 | 1 | HC_vs_MS.NoTrt_F |
| TTC8     | 0.02101 | 0.32932 | 0.757 | 0.69 | 1 | HC_vs_MS.NoTrt_F |
| MED1     | 0.02102 | -0.6677 | 0.396 | 0.48 | 1 | HC_vs_MS.NoTrt_F |
| PLEKHG4  | 0.02103 | -0.5872 | 0.197 | 0.28 | 1 | HC_vs_MS.NoTrt_F |
| ISPD     | 0.02109 | 0.45715 | 0.882 | 0.82 | 1 | HC_vs_MS.NoTrt_F |
| FBXO7    | 0.02117 | -0.3758 | 0.315 | 0.41 | 1 | HC_vs_MS.NoTrt_F |
| RNPEPL1  | 0.02127 | 0.77274 | 0.171 | 0.26 | 1 | HC_vs_MS.NoTrt_F |
| NANS     | 0.02127 | 0.69777 | 0.812 | 0.81 | 1 | HC_vs_MS.NoTrt_F |
| MYCBP    | 0.02131 | 0.48331 | 0.145 | 0.23 | 1 | HC_vs_MS.NoTrt_F |
| CEMIP    | 0.02132 | -0.2802 | 0.069 | 0.13 | 1 | HC_vs_MS.NoTrt_F |
| AHRR     | 0.02138 | 0.38533 | 0.136 | 0.22 | 1 | HC_vs_MS.NoTrt_F |
| XBP1     | 0.0215  | -0.2561 | 0.188 | 0.28 | 1 | HC_vs_MS.NoTrt_F |
| SMARCE1  | 0.02152 | -0.4938 | 0.523 | 0.6  | 1 | HC_vs_MS.NoTrt_F |
| EML6     | 0.02162 | 0.59769 | 0.665 | 0.62 | 1 | HC_vs_MS.NoTrt_F |
| TTYH2    | 0.02166 | -0.4124 | 0.116 | 0.19 | 1 | HC_vs_MS.NoTrt_F |
| SEMA6A   | 0.0217  | 0.31546 | 0.066 | 0.13 | 1 | HC_vs_MS.NoTrt_F |
| CNOT7    | 0.02174 | -0.32   | 0.546 | 0.62 | 1 | HC_vs_MS.NoTrt_F |
| TEPSIN   | 0.02174 | 0.85323 | 0.15  | 0.23 | 1 | HC_vs_MS.NoTrt_F |
| IFI30    | 0.02176 | -0.4829 | 0.364 | 0.48 | 1 | HC_vs_MS.NoTrt_F |
| BTBD19   | 0.02179 | 0.79658 | 0.795 | 0.72 | 1 | HC_vs_MS.NoTrt_F |
| ATP8A1   | 0.0218  | 0.45804 | 0.15  | 0.23 | 1 | HC_vs_MS.NoTrt_F |
| RBMS2    | 0.02183 | 0.38714 | 0.939 | 0.88 | 1 | HC_vs_MS.NoTrt_F |
| BUB1B    | 0.02184 | -0.5556 | 0.448 | 0.34 | 1 | HC_vs_MS.NoTrt_F |
| MIEN1    | 0.02185 | 0.33209 | 0.165 | 0.25 | 1 | HC_vs_MS.NoTrt_F |
| ROMO1    | 0.02192 | 0.44447 | 0.234 | 0.34 | 1 | HC_vs_MS.NoTrt_F |
| PLIN2    | 0.02193 | 0.25659 | 0.697 | 0.76 | 1 | HC_vs_MS.NoTrt_F |
| TEN1     | 0.02194 | -0.7796 | 0.329 | 0.41 | 1 | HC_vs_MS.NoTrt_F |
| MYCBP2   | 0.02197 | 0.4651  | 0.465 | 0.64 | 1 | HC_vs_MS.NoTrt_F |
| PTGES3L  | 0.022   | 0.32166 | 0.844 | 0.82 | 1 | HC_vs_MS.NoTrt_F |
| CCDC144A | 0.02201 | 0.78938 | 0.908 | 0.91 | 1 | HC_vs_MS.NoTrt_F |
| C10orf76 | 0.02211 | -0.3447 | 0.376 | 0.47 | 1 | HC_vs_MS.NoTrt_F |
| ADNP2    | 0.02212 | 0.27821 | 0.078 | 0.14 | 1 | HC_vs_MS.NoTrt_F |
| PGK1     | 0.02215 | -0.258  | 0.717 | 0.79 | 1 | HC_vs_MS.NoTrt_F |
| EXOC7    | 0.02219 | -0.3006 | 0.465 | 0.53 | 1 | HC_vs_MS.NoTrt_F |
| SMTN     | 0.02219 | 0.79054 | 0.442 | 0.32 | 1 | HC_vs_MS.NoTrt_F |
| ZNF362   | 0.02223 | 0.41195 | 0.15  | 0.23 | 1 | HC_vs_MS.NoTrt_F |

|            |         |         |       |      |   |                  |
|------------|---------|---------|-------|------|---|------------------|
| TAOK3      | 0.02229 | 0.34126 | 0.792 | 0.85 | 1 | HC_vs_MS.NoTrt_F |
| DNAJB9     | 0.02232 | 0.25575 | 0.171 | 0.26 | 1 | HC_vs_MS.NoTrt_F |
| ZBED6CL    | 0.02239 | 1.60425 | 0.069 | 0.13 | 1 | HC_vs_MS.NoTrt_F |
| TPP2       | 0.02248 | -0.3114 | 0.517 | 0.64 | 1 | HC_vs_MS.NoTrt_F |
| MRPL14     | 0.02251 | 0.28889 | 0.136 | 0.22 | 1 | HC_vs_MS.NoTrt_F |
| CD300LD    | 0.02265 | 0.25859 | 0.355 | 0.46 | 1 | HC_vs_MS.NoTrt_F |
| MRPL45     | 0.0227  | 0.57157 | 0.078 | 0.14 | 1 | HC_vs_MS.NoTrt_F |
| DNAJC13    | 0.02272 | 0.53034 | 0.263 | 0.36 | 1 | HC_vs_MS.NoTrt_F |
| NPIPB5     | 0.02272 | 0.41306 | 0.971 | 0.99 | 1 | HC_vs_MS.NoTrt_F |
| CDC14A     | 0.0228  | 0.2562  | 0.303 | 0.42 | 1 | HC_vs_MS.NoTrt_F |
| ZCWPW1     | 0.0228  | -0.7977 | 0.095 | 0.17 | 1 | HC_vs_MS.NoTrt_F |
| EIF2A      | 0.02287 | -0.3985 | 0.621 | 0.68 | 1 | HC_vs_MS.NoTrt_F |
| XXbac-BPG2 | 0.02291 | 0.55697 | 0.081 | 0.15 | 1 | HC_vs_MS.NoTrt_F |
| TMEM145    | 0.02294 | 0.26317 | 0.942 | 0.97 | 1 | HC_vs_MS.NoTrt_F |
| POLD2      | 0.02299 | 0.42164 | 0.124 | 0.2  | 1 | HC_vs_MS.NoTrt_F |
| ZBTB32     | 0.02302 | 0.48209 | 0.069 | 0.13 | 1 | HC_vs_MS.NoTrt_F |
| EXTL2      | 0.02302 | 0.46881 | 0.066 | 0.13 | 1 | HC_vs_MS.NoTrt_F |
| SPATS2     | 0.02302 | 0.4452  | 0.977 | 0.95 | 1 | HC_vs_MS.NoTrt_F |
| RUSC1      | 0.02315 | 0.50486 | 0.084 | 0.15 | 1 | HC_vs_MS.NoTrt_F |
| DOCK11     | 0.02316 | 0.3037  | 0.555 | 0.73 | 1 | HC_vs_MS.NoTrt_F |
| ELP5       | 0.02329 | 0.65822 | 0.133 | 0.22 | 1 | HC_vs_MS.NoTrt_F |
| MTHFSD     | 0.02342 | -0.9803 | 0.087 | 0.16 | 1 | HC_vs_MS.NoTrt_F |
| API5       | 0.0235  | -0.6263 | 0.327 | 0.4  | 1 | HC_vs_MS.NoTrt_F |
| MCMBP      | 0.02352 | 0.55641 | 0.523 | 0.6  | 1 | HC_vs_MS.NoTrt_F |
| ZMYM3      | 0.02354 | -0.5319 | 0.408 | 0.51 | 1 | HC_vs_MS.NoTrt_F |
| C6orf1     | 0.02356 | 0.51961 | 0.159 | 0.25 | 1 | HC_vs_MS.NoTrt_F |
| HBB        | 0.02357 | -3.8156 | 0.075 | 0.14 | 1 | HC_vs_MS.NoTrt_F |
| SDHD       | 0.02358 | -0.4135 | 0.685 | 0.75 | 1 | HC_vs_MS.NoTrt_F |
| ZNF626     | 0.02361 | 0.71867 | 0.783 | 0.72 | 1 | HC_vs_MS.NoTrt_F |
| LYAR       | 0.02367 | 0.27202 | 0.121 | 0.2  | 1 | HC_vs_MS.NoTrt_F |
| SLA2       | 0.02369 | -0.5128 | 0.572 | 0.66 | 1 | HC_vs_MS.NoTrt_F |
| ACTR3B     | 0.02377 | 0.79032 | 0.592 | 0.5  | 1 | HC_vs_MS.NoTrt_F |
| ICOS       | 0.02387 | 0.31787 | 0.405 | 0.54 | 1 | HC_vs_MS.NoTrt_F |
| PPARD      | 0.02392 | -0.4949 | 0.561 | 0.65 | 1 | HC_vs_MS.NoTrt_F |
| C5orf45    | 0.02394 | 0.68159 | 0.913 | 0.92 | 1 | HC_vs_MS.NoTrt_F |
| ARPP19     | 0.02402 | 0.30195 | 0.486 | 0.61 | 1 | HC_vs_MS.NoTrt_F |
| SSSCA1     | 0.02407 | 0.29881 | 0.11  | 0.18 | 1 | HC_vs_MS.NoTrt_F |
| RP11-458D2 | 0.02407 | -0.7876 | 0.127 | 0.2  | 1 | HC_vs_MS.NoTrt_F |
| ANXA1      | 0.02409 | 0.58322 | 0.422 | 0.36 | 1 | HC_vs_MS.NoTrt_F |
| RP11-192H2 | 0.0241  | 0.41063 | 0.737 | 0.75 | 1 | HC_vs_MS.NoTrt_F |

|          |         |         |       |      |   |                  |
|----------|---------|---------|-------|------|---|------------------|
| DDX58    | 0.02417 | -0.5949 | 0.364 | 0.45 | 1 | HC_vs_MS.NoTrt_F |
| ATP1A1   | 0.0242  | -0.4021 | 0.749 | 0.81 | 1 | HC_vs_MS.NoTrt_F |
| KIAA0825 | 0.02421 | 0.9537  | 0.361 | 0.47 | 1 | HC_vs_MS.NoTrt_F |
| DBT      | 0.02423 | -0.535  | 0.867 | 0.92 | 1 | HC_vs_MS.NoTrt_F |
| CREB1    | 0.02432 | -0.5218 | 0.665 | 0.71 | 1 | HC_vs_MS.NoTrt_F |
| NMRK1    | 0.02438 | -0.6412 | 0.382 | 0.44 | 1 | HC_vs_MS.NoTrt_F |
| LRFN1    | 0.02439 | -0.618  | 0.173 | 0.25 | 1 | HC_vs_MS.NoTrt_F |
| AMIGO2   | 0.0244  | -0.4029 | 0.058 | 0.12 | 1 | HC_vs_MS.NoTrt_F |
| ZNF624   | 0.02447 | -0.306  | 0.434 | 0.52 | 1 | HC_vs_MS.NoTrt_F |
| NSA2     | 0.02455 | 0.28959 | 0.335 | 0.44 | 1 | HC_vs_MS.NoTrt_F |
| ZNF420   | 0.02459 | -0.4557 | 0.127 | 0.2  | 1 | HC_vs_MS.NoTrt_F |
| IFI35    | 0.0246  | 0.64612 | 0.873 | 0.83 | 1 | HC_vs_MS.NoTrt_F |
| POT1     | 0.02467 | -0.5996 | 0.11  | 0.18 | 1 | HC_vs_MS.NoTrt_F |
| TNPO1    | 0.02468 | -0.297  | 0.549 | 0.63 | 1 | HC_vs_MS.NoTrt_F |
| ZYG11B   | 0.02468 | -0.2537 | 0.763 | 0.82 | 1 | HC_vs_MS.NoTrt_F |
| KIF5C    | 0.02468 | -0.4608 | 0.058 | 0.12 | 1 | HC_vs_MS.NoTrt_F |
| MGST2    | 0.02469 | -0.5834 | 0.214 | 0.29 | 1 | HC_vs_MS.NoTrt_F |
| TTC27    | 0.02471 | 1.04718 | 0.145 | 0.23 | 1 | HC_vs_MS.NoTrt_F |
| CRB3     | 0.02476 | 0.2909  | 0.064 | 0.12 | 1 | HC_vs_MS.NoTrt_F |
| ARL8B    | 0.02477 | -0.4521 | 0.474 | 0.55 | 1 | HC_vs_MS.NoTrt_F |
| HTRA2    | 0.0248  | -0.3245 | 0.139 | 0.22 | 1 | HC_vs_MS.NoTrt_F |
| DOT1L    | 0.02486 | 0.67271 | 0.818 | 0.79 | 1 | HC_vs_MS.NoTrt_F |
| ATR      | 0.02488 | 0.25921 | 0.561 | 0.66 | 1 | HC_vs_MS.NoTrt_F |
| DDX52    | 0.02488 | 0.41339 | 0.916 | 0.89 | 1 | HC_vs_MS.NoTrt_F |
| CLYBL    | 0.02489 | -0.2891 | 0.124 | 0.2  | 1 | HC_vs_MS.NoTrt_F |
| SEMA4B   | 0.02489 | -1.0754 | 0.376 | 0.48 | 1 | HC_vs_MS.NoTrt_F |
| ACTR6    | 0.02496 | -0.2957 | 0.564 | 0.65 | 1 | HC_vs_MS.NoTrt_F |
| GFM2     | 0.025   | -1.0105 | 0.254 | 0.34 | 1 | HC_vs_MS.NoTrt_F |
| SLF1     | 0.02513 | 0.4522  | 0.197 | 0.29 | 1 | HC_vs_MS.NoTrt_F |
| PYGM     | 0.02514 | 0.33902 | 0.801 | 0.77 | 1 | HC_vs_MS.NoTrt_F |
| ZER1     | 0.02517 | -0.3386 | 0.145 | 0.22 | 1 | HC_vs_MS.NoTrt_F |
| EVI2A    | 0.02521 | 0.4573  | 0.225 | 0.33 | 1 | HC_vs_MS.NoTrt_F |
| ZNF649   | 0.02521 | 0.38378 | 0.205 | 0.29 | 1 | HC_vs_MS.NoTrt_F |
| GRPEL1   | 0.02531 | -0.2855 | 0.156 | 0.24 | 1 | HC_vs_MS.NoTrt_F |
| NUTM2D   | 0.02535 | 0.27501 | 0.095 | 0.17 | 1 | HC_vs_MS.NoTrt_F |
| KRBOX4   | 0.02543 | -0.4259 | 0.483 | 0.58 | 1 | HC_vs_MS.NoTrt_F |
| TMEM261  | 0.02544 | 0.29106 | 0.165 | 0.25 | 1 | HC_vs_MS.NoTrt_F |
| RFXANK   | 0.0255  | -0.7303 | 0.26  | 0.35 | 1 | HC_vs_MS.NoTrt_F |
| GPR22    | 0.02554 | -0.5446 | 0.127 | 0.2  | 1 | HC_vs_MS.NoTrt_F |
| PGBD2    | 0.02567 | -0.6783 | 0.373 | 0.48 | 1 | HC_vs_MS.NoTrt_F |

|          |         |         |       |      |   |                  |
|----------|---------|---------|-------|------|---|------------------|
| CCR3     | 0.02568 | 0.55481 | 0.078 | 0.14 | 1 | HC_vs_MS.NoTrt_F |
| AKT3     | 0.02569 | 0.67487 | 0.798 | 0.76 | 1 | HC_vs_MS.NoTrt_F |
| CKS2     | 0.02571 | 0.38027 | 0.069 | 0.13 | 1 | HC_vs_MS.NoTrt_F |
| ZBTB41   | 0.02573 | 1.44545 | 0.066 | 0.13 | 1 | HC_vs_MS.NoTrt_F |
| CCDC142  | 0.02575 | 0.29073 | 0.676 | 0.61 | 1 | HC_vs_MS.NoTrt_F |
| SLC41A3  | 0.02578 | -0.4494 | 0.393 | 0.49 | 1 | HC_vs_MS.NoTrt_F |
| NDUFC1   | 0.02578 | 0.48581 | 0.289 | 0.4  | 1 | HC_vs_MS.NoTrt_F |
| SIRT3    | 0.02588 | 0.81748 | 0.318 | 0.41 | 1 | HC_vs_MS.NoTrt_F |
| GPRASP1  | 0.02595 | 0.92884 | 0.075 | 0.14 | 1 | HC_vs_MS.NoTrt_F |
| PAIP2B   | 0.02602 | -0.521  | 0.254 | 0.34 | 1 | HC_vs_MS.NoTrt_F |
| PLIN3    | 0.02604 | -0.5368 | 0.561 | 0.6  | 1 | HC_vs_MS.NoTrt_F |
| ZFP37    | 0.02606 | -1.0024 | 0.425 | 0.51 | 1 | HC_vs_MS.NoTrt_F |
| DDX19B   | 0.02623 | -0.3826 | 0.509 | 0.57 | 1 | HC_vs_MS.NoTrt_F |
| TMEM98   | 0.02623 | 0.35597 | 0.61  | 0.53 | 1 | HC_vs_MS.NoTrt_F |
| GRHL1    | 0.02631 | -0.3787 | 0.509 | 0.59 | 1 | HC_vs_MS.NoTrt_F |
| BLVRB    | 0.02631 | 0.35098 | 0.413 | 0.31 | 1 | HC_vs_MS.NoTrt_F |
| RARG     | 0.02653 | 0.85628 | 0.055 | 0.11 | 1 | HC_vs_MS.NoTrt_F |
| MKS1     | 0.02655 | 0.57608 | 0.081 | 0.14 | 1 | HC_vs_MS.NoTrt_F |
| NGDN     | 0.02658 | -0.3714 | 0.367 | 0.45 | 1 | HC_vs_MS.NoTrt_F |
| QSER1    | 0.02669 | -0.6178 | 0.11  | 0.18 | 1 | HC_vs_MS.NoTrt_F |
| LILRA2   | 0.0267  | 0.34871 | 0.838 | 0.75 | 1 | HC_vs_MS.NoTrt_F |
| MRPS30   | 0.02672 | -0.2804 | 0.312 | 0.39 | 1 | HC_vs_MS.NoTrt_F |
| TLE4     | 0.02675 | 0.65428 | 0.199 | 0.29 | 1 | HC_vs_MS.NoTrt_F |
| DOCK7    | 0.02678 | 0.41506 | 0.974 | 0.96 | 1 | HC_vs_MS.NoTrt_F |
| KBTBD6   | 0.02678 | -0.2727 | 0.399 | 0.46 | 1 | HC_vs_MS.NoTrt_F |
| KIAA1586 | 0.02683 | -0.3012 | 0.104 | 0.17 | 1 | HC_vs_MS.NoTrt_F |
| IL1RL1   | 0.02693 | 1.65097 | 0.124 | 0.2  | 1 | HC_vs_MS.NoTrt_F |
| KIZ      | 0.02693 | 0.85964 | 0.147 | 0.23 | 1 | HC_vs_MS.NoTrt_F |
| GGPS1    | 0.02702 | -0.4101 | 0.454 | 0.55 | 1 | HC_vs_MS.NoTrt_F |
| SLC35C1  | 0.02707 | 0.40367 | 0.072 | 0.13 | 1 | HC_vs_MS.NoTrt_F |
| CASD1    | 0.02709 | 1.1443  | 0.075 | 0.14 | 1 | HC_vs_MS.NoTrt_F |
| UCKL1    | 0.02715 | 0.29813 | 0.188 | 0.28 | 1 | HC_vs_MS.NoTrt_F |
| IFFO2    | 0.02717 | -0.4123 | 0.176 | 0.25 | 1 | HC_vs_MS.NoTrt_F |
| NLRP2    | 0.02742 | 0.2755  | 0.85  | 0.8  | 1 | HC_vs_MS.NoTrt_F |
| NPEPL1   | 0.02745 | 0.85174 | 0.176 | 0.27 | 1 | HC_vs_MS.NoTrt_F |
| ARRDC1   | 0.02763 | -0.2994 | 0.306 | 0.38 | 1 | HC_vs_MS.NoTrt_F |
| REV1     | 0.02768 | -0.8029 | 0.211 | 0.29 | 1 | HC_vs_MS.NoTrt_F |
| ZNF627   | 0.02775 | 1.29517 | 0.633 | 0.54 | 1 | HC_vs_MS.NoTrt_F |
| JCHAIN   | 0.02779 | 1.2011  | 0.11  | 0.18 | 1 | HC_vs_MS.NoTrt_F |
| MLYCD    | 0.02782 | -0.3175 | 0.422 | 0.51 | 1 | HC_vs_MS.NoTrt_F |

|            |         |         |       |      |   |                  |
|------------|---------|---------|-------|------|---|------------------|
| GSTP1      | 0.02782 | -0.7314 | 0.075 | 0.13 | 1 | HC_vs_MS.NoTrt_F |
| KLF10      | 0.02786 | -0.4701 | 0.098 | 0.17 | 1 | HC_vs_MS.NoTrt_F |
| DPP4       | 0.0279  | 0.32843 | 0.124 | 0.2  | 1 | HC_vs_MS.NoTrt_F |
| UBR3       | 0.02792 | -0.4905 | 0.171 | 0.24 | 1 | HC_vs_MS.NoTrt_F |
| CFAP70     | 0.02804 | -0.7922 | 0.269 | 0.35 | 1 | HC_vs_MS.NoTrt_F |
| ABHD16A    | 0.02805 | -0.3987 | 0.208 | 0.29 | 1 | HC_vs_MS.NoTrt_F |
| BUD13      | 0.02807 | 0.34257 | 0.104 | 0.17 | 1 | HC_vs_MS.NoTrt_F |
| GPR68      | 0.02816 | 0.53036 | 0.139 | 0.22 | 1 | HC_vs_MS.NoTrt_F |
| FAAH2      | 0.02818 | 0.80573 | 0.127 | 0.2  | 1 | HC_vs_MS.NoTrt_F |
| KDELRL1    | 0.0282  | -0.8008 | 0.266 | 0.35 | 1 | HC_vs_MS.NoTrt_F |
| ALAD       | 0.02825 | -0.3243 | 0.431 | 0.52 | 1 | HC_vs_MS.NoTrt_F |
| CENPI      | 0.02826 | 0.86492 | 0.471 | 0.39 | 1 | HC_vs_MS.NoTrt_F |
| RAD50      | 0.02827 | 0.5948  | 0.225 | 0.32 | 1 | HC_vs_MS.NoTrt_F |
| RP11-244H3 | 0.02837 | -0.8998 | 0.107 | 0.17 | 1 | HC_vs_MS.NoTrt_F |
| LILRA5     | 0.0284  | 0.32205 | 0.754 | 0.76 | 1 | HC_vs_MS.NoTrt_F |
| GEMIN5     | 0.02843 | -0.6496 | 0.052 | 0.11 | 1 | HC_vs_MS.NoTrt_F |
| GID8       | 0.02849 | 0.3463  | 0.191 | 0.28 | 1 | HC_vs_MS.NoTrt_F |
| ST20-MTHFS | 0.02859 | 0.29932 | 0.145 | 0.22 | 1 | HC_vs_MS.NoTrt_F |
| CEP55      | 0.02865 | -0.5437 | 0.15  | 0.23 | 1 | HC_vs_MS.NoTrt_F |
| CMIP       | 0.02867 | -0.3542 | 0.11  | 0.18 | 1 | HC_vs_MS.NoTrt_F |
| IMPACT     | 0.02869 | -0.3314 | 0.061 | 0.12 | 1 | HC_vs_MS.NoTrt_F |
| GDF5       | 0.0287  | 0.27179 | 0.081 | 0.14 | 1 | HC_vs_MS.NoTrt_F |
| NXT1       | 0.02871 | -0.3873 | 0.118 | 0.19 | 1 | HC_vs_MS.NoTrt_F |
| RSBN1      | 0.02873 | 0.41995 | 0.275 | 0.38 | 1 | HC_vs_MS.NoTrt_F |
| KIAA0556   | 0.02875 | -0.5659 | 0.358 | 0.45 | 1 | HC_vs_MS.NoTrt_F |
| LDLR       | 0.02881 | 0.54216 | 0.98  | 0.96 | 1 | HC_vs_MS.NoTrt_F |
| VPS18      | 0.02889 | -0.7827 | 0.251 | 0.34 | 1 | HC_vs_MS.NoTrt_F |
| SCFD2      | 0.0289  | 0.7387  | 0.087 | 0.16 | 1 | HC_vs_MS.NoTrt_F |
| WDR60      | 0.02898 | 0.29163 | 0.15  | 0.23 | 1 | HC_vs_MS.NoTrt_F |
| CCDC88C    | 0.02905 | 0.25637 | 0.569 | 0.67 | 1 | HC_vs_MS.NoTrt_F |
| TMEM187    | 0.02906 | 0.91531 | 0.064 | 0.12 | 1 | HC_vs_MS.NoTrt_F |
| KDM1A      | 0.02917 | 0.35345 | 0.084 | 0.15 | 1 | HC_vs_MS.NoTrt_F |
| IPPK       | 0.02924 | -0.8342 | 0.101 | 0.17 | 1 | HC_vs_MS.NoTrt_F |
| AC009133.2 | 0.02928 | 0.29179 | 0.124 | 0.2  | 1 | HC_vs_MS.NoTrt_F |
| PECAM1     | 0.02939 | 0.60858 | 0.798 | 0.76 | 1 | HC_vs_MS.NoTrt_F |
| LAMC3      | 0.02945 | 0.25718 | 0.283 | 0.39 | 1 | HC_vs_MS.NoTrt_F |
| HMCES      | 0.02963 | 0.35356 | 0.136 | 0.21 | 1 | HC_vs_MS.NoTrt_F |
| BAHD1      | 0.02973 | 1.2215  | 0.075 | 0.14 | 1 | HC_vs_MS.NoTrt_F |
| KXD1       | 0.02974 | -0.361  | 0.858 | 0.87 | 1 | HC_vs_MS.NoTrt_F |
| PNPLA7     | 0.02975 | 0.7539  | 0.098 | 0.17 | 1 | HC_vs_MS.NoTrt_F |

|          |         |         |       |      |   |                  |
|----------|---------|---------|-------|------|---|------------------|
| H1FX     | 0.02981 | 0.80075 | 0.064 | 0.12 | 1 | HC_vs_MS.NoTrt_F |
| MOB3C    | 0.02993 | 1.38282 | 0.072 | 0.13 | 1 | HC_vs_MS.NoTrt_F |
| GPAT2    | 0.02998 | 0.26311 | 0.052 | 0.11 | 1 | HC_vs_MS.NoTrt_F |
| PPIC     | 0.03    | 0.34336 | 0.173 | 0.11 | 1 | HC_vs_MS.NoTrt_F |
| ZNF124   | 0.03006 | 0.98197 | 0.769 | 0.67 | 1 | HC_vs_MS.NoTrt_F |
| C1GALT1  | 0.03023 | -0.298  | 0.613 | 0.67 | 1 | HC_vs_MS.NoTrt_F |
| KLRB1    | 0.03032 | 0.35352 | 0.199 | 0.29 | 1 | HC_vs_MS.NoTrt_F |
| CTSA     | 0.03039 | -0.6678 | 0.668 | 0.74 | 1 | HC_vs_MS.NoTrt_F |
| GPX3     | 0.03041 | 0.89896 | 0.205 | 0.14 | 1 | HC_vs_MS.NoTrt_F |
| IDH3G    | 0.03042 | 0.29183 | 0.197 | 0.29 | 1 | HC_vs_MS.NoTrt_F |
| RASAL3   | 0.03049 | 0.36001 | 0.22  | 0.32 | 1 | HC_vs_MS.NoTrt_F |
| GGT1     | 0.03049 | 0.83345 | 0.156 | 0.24 | 1 | HC_vs_MS.NoTrt_F |
| FLYWCH1  | 0.03052 | 0.27267 | 0.832 | 0.9  | 1 | HC_vs_MS.NoTrt_F |
| ACAN     | 0.03053 | 0.30336 | 0.269 | 0.37 | 1 | HC_vs_MS.NoTrt_F |
| TRMT10C  | 0.03057 | 0.44571 | 0.121 | 0.19 | 1 | HC_vs_MS.NoTrt_F |
| SLC25A51 | 0.03065 | -0.6107 | 0.575 | 0.64 | 1 | HC_vs_MS.NoTrt_F |
| CISD3    | 0.03071 | 0.43972 | 0.118 | 0.19 | 1 | HC_vs_MS.NoTrt_F |
| ICE1     | 0.03071 | 0.86411 | 0.118 | 0.19 | 1 | HC_vs_MS.NoTrt_F |
| ENSA     | 0.03075 | -0.5501 | 0.821 | 0.88 | 1 | HC_vs_MS.NoTrt_F |
| GRK3     | 0.03079 | -0.581  | 0.408 | 0.48 | 1 | HC_vs_MS.NoTrt_F |
| SLC10A7  | 0.03086 | -0.6162 | 0.107 | 0.17 | 1 | HC_vs_MS.NoTrt_F |
| XXYLT1   | 0.03093 | -0.788  | 0.217 | 0.3  | 1 | HC_vs_MS.NoTrt_F |
| AGTRAP   | 0.03117 | 0.35026 | 0.179 | 0.27 | 1 | HC_vs_MS.NoTrt_F |
| C15orf39 | 0.0312  | 0.51911 | 0.098 | 0.17 | 1 | HC_vs_MS.NoTrt_F |
| SFXN2    | 0.03136 | 0.44914 | 0.925 | 0.93 | 1 | HC_vs_MS.NoTrt_F |
| EIF4A3   | 0.03138 | -1.2689 | 0.786 | 0.8  | 1 | HC_vs_MS.NoTrt_F |
| GRK6     | 0.0314  | 0.34304 | 0.223 | 0.32 | 1 | HC_vs_MS.NoTrt_F |
| TOR2A    | 0.03143 | -0.4392 | 0.133 | 0.2  | 1 | HC_vs_MS.NoTrt_F |
| C12orf50 | 0.03144 | 0.3163  | 0.922 | 0.95 | 1 | HC_vs_MS.NoTrt_F |
| STAMBP   | 0.03148 | 0.29057 | 0.162 | 0.24 | 1 | HC_vs_MS.NoTrt_F |
| EIF4E    | 0.03166 | 0.25847 | 0.988 | 0.99 | 1 | HC_vs_MS.NoTrt_F |
| MEPCE    | 0.03166 | 1.15419 | 0.084 | 0.15 | 1 | HC_vs_MS.NoTrt_F |
| XKR6     | 0.03175 | 0.59348 | 0.084 | 0.15 | 1 | HC_vs_MS.NoTrt_F |
| SUN1     | 0.0318  | 0.48208 | 0.717 | 0.7  | 1 | HC_vs_MS.NoTrt_F |
| GRIN2C   | 0.03188 | 0.35821 | 0.28  | 0.38 | 1 | HC_vs_MS.NoTrt_F |
| FMR1     | 0.03189 | -0.3894 | 0.153 | 0.23 | 1 | HC_vs_MS.NoTrt_F |
| SCMH1    | 0.03193 | 0.46262 | 0.176 | 0.26 | 1 | HC_vs_MS.NoTrt_F |
| CHRNA6   | 0.03195 | 0.76589 | 0.367 | 0.28 | 1 | HC_vs_MS.NoTrt_F |
| C4orf48  | 0.03198 | 0.39541 | 0.162 | 0.25 | 1 | HC_vs_MS.NoTrt_F |
| GLCE     | 0.03199 | -1.2587 | 0.165 | 0.23 | 1 | HC_vs_MS.NoTrt_F |



|             |         |         |       |      |   |                  |
|-------------|---------|---------|-------|------|---|------------------|
| TXNDC12     | 0.03203 | 0.30283 | 0.199 | 0.28 | 1 | HC_vs_MS.NoTrt_F |
| GSAP        | 0.03204 | 0.71762 | 0.09  | 0.16 | 1 | HC_vs_MS.NoTrt_F |
| ZNF586      | 0.03206 | 0.29522 | 0.211 | 0.3  | 1 | HC_vs_MS.NoTrt_F |
| ABCC5       | 0.03209 | -0.4578 | 0.179 | 0.25 | 1 | HC_vs_MS.NoTrt_F |
| PGGT1B      | 0.03209 | 0.3298  | 0.202 | 0.29 | 1 | HC_vs_MS.NoTrt_F |
| TRIM58      | 0.03222 | 0.45768 | 0.691 | 0.61 | 1 | HC_vs_MS.NoTrt_F |
| VPS51       | 0.03225 | 0.32856 | 0.283 | 0.39 | 1 | HC_vs_MS.NoTrt_F |
| CAND1       | 0.03226 | -0.4314 | 0.867 | 0.91 | 1 | HC_vs_MS.NoTrt_F |
| MFSD5       | 0.03232 | -0.5348 | 0.092 | 0.16 | 1 | HC_vs_MS.NoTrt_F |
| OSBP        | 0.03234 | 0.81173 | 0.095 | 0.16 | 1 | HC_vs_MS.NoTrt_F |
| USP13       | 0.03234 | -0.3427 | 0.347 | 0.43 | 1 | HC_vs_MS.NoTrt_F |
| RBM26       | 0.03235 | 0.2687  | 0.506 | 0.6  | 1 | HC_vs_MS.NoTrt_F |
| MED17       | 0.03243 | 0.32588 | 0.957 | 0.95 | 1 | HC_vs_MS.NoTrt_F |
| NFE2L3      | 0.0325  | -0.8618 | 0.116 | 0.18 | 1 | HC_vs_MS.NoTrt_F |
| EIF4ENIF1   | 0.03257 | 0.43386 | 0.653 | 0.71 | 1 | HC_vs_MS.NoTrt_F |
| SSX5        | 0.03264 | -0.3889 | 0.188 | 0.27 | 1 | HC_vs_MS.NoTrt_F |
| SARM1       | 0.03264 | 0.26929 | 0.422 | 0.51 | 1 | HC_vs_MS.NoTrt_F |
| RORC        | 0.03266 | 0.95205 | 0.121 | 0.19 | 1 | HC_vs_MS.NoTrt_F |
| EIF2B3      | 0.03267 | -0.5251 | 0.477 | 0.53 | 1 | HC_vs_MS.NoTrt_F |
| CRYL1       | 0.03267 | 0.42197 | 0.11  | 0.18 | 1 | HC_vs_MS.NoTrt_F |
| KIFC3       | 0.03274 | 0.53703 | 0.751 | 0.67 | 1 | HC_vs_MS.NoTrt_F |
| PIK3R5      | 0.03281 | 0.2763  | 0.422 | 0.55 | 1 | HC_vs_MS.NoTrt_F |
| NAXE        | 0.03289 | 0.417   | 0.162 | 0.24 | 1 | HC_vs_MS.NoTrt_F |
| GNPDA2      | 0.03292 | 0.47601 | 0.092 | 0.16 | 1 | HC_vs_MS.NoTrt_F |
| C17orf89    | 0.03293 | 0.59181 | 0.095 | 0.16 | 1 | HC_vs_MS.NoTrt_F |
| HDAC6       | 0.03298 | -0.3415 | 0.896 | 0.92 | 1 | HC_vs_MS.NoTrt_F |
| FAM53C      | 0.03302 | 0.62401 | 0.841 | 0.82 | 1 | HC_vs_MS.NoTrt_F |
| RAB7A       | 0.0331  | -0.3646 | 0.474 | 0.55 | 1 | HC_vs_MS.NoTrt_F |
| FBXL15      | 0.03312 | 0.3826  | 0.162 | 0.24 | 1 | HC_vs_MS.NoTrt_F |
| CCDC174     | 0.03314 | 0.34669 | 0.211 | 0.3  | 1 | HC_vs_MS.NoTrt_F |
| NOL9        | 0.03333 | 0.35286 | 0.968 | 0.96 | 1 | HC_vs_MS.NoTrt_F |
| ENG         | 0.03336 | 1.33939 | 0.205 | 0.14 | 1 | HC_vs_MS.NoTrt_F |
| CTD-3148110 | 0.03342 | 0.26487 | 0.11  | 0.18 | 1 | HC_vs_MS.NoTrt_F |
| TNFAIP8     | 0.03342 | -0.3033 | 0.899 | 0.91 | 1 | HC_vs_MS.NoTrt_F |
| CYP2E1      | 0.03351 | 0.75691 | 0.087 | 0.15 | 1 | HC_vs_MS.NoTrt_F |
| ZFP36L1     | 0.03353 | 0.61538 | 0.769 | 0.76 | 1 | HC_vs_MS.NoTrt_F |
| LAMTOR1     | 0.03354 | 0.31383 | 0.254 | 0.37 | 1 | HC_vs_MS.NoTrt_F |
| BPIFB1      | 0.03362 | -0.3407 | 0.486 | 0.59 | 1 | HC_vs_MS.NoTrt_F |
| ODF2L       | 0.03368 | 0.44658 | 0.986 | 0.97 | 1 | HC_vs_MS.NoTrt_F |
| PTPN22      | 0.03372 | -0.3723 | 0.416 | 0.51 | 1 | HC_vs_MS.NoTrt_F |

|          |         |         |       |      |   |                  |
|----------|---------|---------|-------|------|---|------------------|
| TXLNG    | 0.03372 | 0.30384 | 0.139 | 0.22 | 1 | HC_vs_MS.NoTrt_F |
| SULT1A2  | 0.03378 | 0.26127 | 0.197 | 0.28 | 1 | HC_vs_MS.NoTrt_F |
| HEXB     | 0.03385 | -0.2913 | 0.197 | 0.28 | 1 | HC_vs_MS.NoTrt_F |
| ZNF780B  | 0.03387 | -1.1558 | 0.584 | 0.65 | 1 | HC_vs_MS.NoTrt_F |
| ZNF236   | 0.03391 | 0.43655 | 0.182 | 0.27 | 1 | HC_vs_MS.NoTrt_F |
| AKAP17A  | 0.03405 | -0.3813 | 0.118 | 0.19 | 1 | HC_vs_MS.NoTrt_F |
| SHTN1    | 0.03412 | -1.0076 | 0.118 | 0.19 | 1 | HC_vs_MS.NoTrt_F |
| LY6G5B   | 0.03413 | 0.28473 | 0.864 | 0.82 | 1 | HC_vs_MS.NoTrt_F |
| ATPAF1   | 0.03423 | -0.3834 | 0.263 | 0.34 | 1 | HC_vs_MS.NoTrt_F |
| CDKL1    | 0.03438 | 0.72585 | 0.803 | 0.73 | 1 | HC_vs_MS.NoTrt_F |
| PHACTR1  | 0.03439 | 0.90943 | 0.477 | 0.38 | 1 | HC_vs_MS.NoTrt_F |
| KRT8     | 0.03445 | 0.30109 | 0.867 | 0.83 | 1 | HC_vs_MS.NoTrt_F |
| EIF4E2   | 0.03449 | -0.293  | 0.393 | 0.47 | 1 | HC_vs_MS.NoTrt_F |
| MINA     | 0.03455 | 0.5129  | 0.127 | 0.2  | 1 | HC_vs_MS.NoTrt_F |
| KYAT1    | 0.03464 | -0.259  | 0.173 | 0.25 | 1 | HC_vs_MS.NoTrt_F |
| ZNF333   | 0.03466 | 0.73961 | 0.942 | 0.94 | 1 | HC_vs_MS.NoTrt_F |
| PIAS4    | 0.03485 | 0.57454 | 0.231 | 0.32 | 1 | HC_vs_MS.NoTrt_F |
| TP63     | 0.03486 | 0.32298 | 0.465 | 0.57 | 1 | HC_vs_MS.NoTrt_F |
| STX8     | 0.03486 | 0.53668 | 0.884 | 0.87 | 1 | HC_vs_MS.NoTrt_F |
| IGSF9    | 0.03487 | -0.3181 | 0.344 | 0.41 | 1 | HC_vs_MS.NoTrt_F |
| ZDHHC14  | 0.03493 | 0.56253 | 0.338 | 0.44 | 1 | HC_vs_MS.NoTrt_F |
| ZNF428   | 0.03495 | -0.2599 | 0.234 | 0.32 | 1 | HC_vs_MS.NoTrt_F |
| CCDC82   | 0.03504 | 0.62292 | 0.194 | 0.28 | 1 | HC_vs_MS.NoTrt_F |
| HSF5     | 0.03507 | 0.47012 | 0.098 | 0.16 | 1 | HC_vs_MS.NoTrt_F |
| CREBBP   | 0.03518 | 0.5893  | 0.59  | 0.66 | 1 | HC_vs_MS.NoTrt_F |
| RNF125   | 0.03524 | 0.3778  | 0.951 | 0.95 | 1 | HC_vs_MS.NoTrt_F |
| LHPP     | 0.03524 | 0.52188 | 0.15  | 0.23 | 1 | HC_vs_MS.NoTrt_F |
| GRHPR    | 0.03525 | -0.6422 | 0.549 | 0.6  | 1 | HC_vs_MS.NoTrt_F |
| ZDHHC16  | 0.03541 | -0.5693 | 0.118 | 0.18 | 1 | HC_vs_MS.NoTrt_F |
| CYB5D2   | 0.03564 | 0.31185 | 0.431 | 0.53 | 1 | HC_vs_MS.NoTrt_F |
| PPP1R3E  | 0.03565 | 0.41893 | 0.246 | 0.33 | 1 | HC_vs_MS.NoTrt_F |
| CCDC170  | 0.03568 | 0.29263 | 0.506 | 0.4  | 1 | HC_vs_MS.NoTrt_F |
| SLFN12   | 0.03568 | 0.61289 | 0.078 | 0.14 | 1 | HC_vs_MS.NoTrt_F |
| N4BP1    | 0.03573 | 0.25897 | 0.168 | 0.25 | 1 | HC_vs_MS.NoTrt_F |
| FPR2     | 0.03577 | -0.3385 | 0.546 | 0.43 | 1 | HC_vs_MS.NoTrt_F |
| ZNF287   | 0.03587 | 0.48535 | 0.517 | 0.44 | 1 | HC_vs_MS.NoTrt_F |
| PLSCR1   | 0.03593 | 0.26069 | 0.058 | 0.11 | 1 | HC_vs_MS.NoTrt_F |
| C10orf10 | 0.036   | 1.73517 | 0.107 | 0.06 | 1 | HC_vs_MS.NoTrt_F |
| PPIF     | 0.03611 | -0.5693 | 0.116 | 0.18 | 1 | HC_vs_MS.NoTrt_F |
| EXO1     | 0.03616 | 0.37791 | 0.197 | 0.28 | 1 | HC_vs_MS.NoTrt_F |

|          |         |         |       |      |   |                  |
|----------|---------|---------|-------|------|---|------------------|
| ZNF445   | 0.03627 | 0.36001 | 0.988 | 0.98 | 1 | HC_vs_MS.NoTrt_F |
| ADGRE2   | 0.03637 | 0.7809  | 0.855 | 0.86 | 1 | HC_vs_MS.NoTrt_F |
| SCRG1    | 0.03641 | 0.33203 | 0.806 | 0.75 | 1 | HC_vs_MS.NoTrt_F |
| SORL1    | 0.0365  | -0.2954 | 0.723 | 0.77 | 1 | HC_vs_MS.NoTrt_F |
| CDH15    | 0.03655 | 0.25505 | 0.535 | 0.44 | 1 | HC_vs_MS.NoTrt_F |
| TRIM11   | 0.03663 | -1.0853 | 0.604 | 0.64 | 1 | HC_vs_MS.NoTrt_F |
| BLVRA    | 0.03665 | 0.47324 | 0.156 | 0.23 | 1 | HC_vs_MS.NoTrt_F |
| RAC1     | 0.03674 | 0.68899 | 0.182 | 0.27 | 1 | HC_vs_MS.NoTrt_F |
| MT-ATP8  | 0.03679 | 0.4555  | 0.783 | 0.8  | 1 | HC_vs_MS.NoTrt_F |
| DNAH1    | 0.03681 | 0.32148 | 0.211 | 0.3  | 1 | HC_vs_MS.NoTrt_F |
| TET1     | 0.03684 | 0.44603 | 0.095 | 0.16 | 1 | HC_vs_MS.NoTrt_F |
| NT5DC1   | 0.03689 | 0.4443  | 0.223 | 0.3  | 1 | HC_vs_MS.NoTrt_F |
| LEMD2    | 0.03699 | 0.59781 | 0.118 | 0.19 | 1 | HC_vs_MS.NoTrt_F |
| NUP153   | 0.037   | 0.27634 | 0.249 | 0.34 | 1 | HC_vs_MS.NoTrt_F |
| CHRNA1   | 0.03717 | 0.78097 | 0.659 | 0.6  | 1 | HC_vs_MS.NoTrt_F |
| PSEN2    | 0.03719 | -1.0237 | 0.15  | 0.23 | 1 | HC_vs_MS.NoTrt_F |
| CD151    | 0.03721 | 0.37281 | 0.942 | 0.92 | 1 | HC_vs_MS.NoTrt_F |
| ALKBH6   | 0.03725 | -0.5775 | 0.538 | 0.6  | 1 | HC_vs_MS.NoTrt_F |
| TK2      | 0.0373  | 0.77038 | 0.168 | 0.24 | 1 | HC_vs_MS.NoTrt_F |
| ITPK1    | 0.03734 | -0.4934 | 0.673 | 0.58 | 1 | HC_vs_MS.NoTrt_F |
| NRIP2    | 0.03737 | -0.474  | 0.335 | 0.4  | 1 | HC_vs_MS.NoTrt_F |
| ZNF514   | 0.03743 | -0.5481 | 0.642 | 0.69 | 1 | HC_vs_MS.NoTrt_F |
| C1orf123 | 0.03761 | -0.4288 | 0.22  | 0.29 | 1 | HC_vs_MS.NoTrt_F |
| SLC4A2   | 0.03761 | 0.33055 | 0.09  | 0.16 | 1 | HC_vs_MS.NoTrt_F |
| ADAM32   | 0.03765 | 0.32103 | 0.896 | 0.93 | 1 | HC_vs_MS.NoTrt_F |
| TNRC18   | 0.03767 | 0.672   | 0.847 | 0.81 | 1 | HC_vs_MS.NoTrt_F |
| ADTRP    | 0.03768 | -0.7724 | 0.37  | 0.43 | 1 | HC_vs_MS.NoTrt_F |
| ZNF496   | 0.03779 | 0.80959 | 0.769 | 0.74 | 1 | HC_vs_MS.NoTrt_F |
| DBNDD2   | 0.03783 | 0.28011 | 0.066 | 0.12 | 1 | HC_vs_MS.NoTrt_F |
| C2CD5    | 0.0379  | -0.2929 | 0.211 | 0.29 | 1 | HC_vs_MS.NoTrt_F |
| NAALADL2 | 0.03799 | 0.27534 | 0.092 | 0.16 | 1 | HC_vs_MS.NoTrt_F |
| VIL1     | 0.03812 | 0.62297 | 0.217 | 0.29 | 1 | HC_vs_MS.NoTrt_F |
| TRMT5    | 0.03819 | -1.3333 | 0.165 | 0.23 | 1 | HC_vs_MS.NoTrt_F |
| TCP11L1  | 0.03823 | -0.3457 | 0.199 | 0.28 | 1 | HC_vs_MS.NoTrt_F |
| MAGEH1   | 0.0383  | 0.48735 | 0.11  | 0.18 | 1 | HC_vs_MS.NoTrt_F |
| TSPAN32  | 0.03831 | 0.40431 | 0.251 | 0.36 | 1 | HC_vs_MS.NoTrt_F |
| EHMT2    | 0.03842 | -0.4708 | 0.699 | 0.77 | 1 | HC_vs_MS.NoTrt_F |
| RBM15    | 0.03853 | 0.60324 | 0.078 | 0.14 | 1 | HC_vs_MS.NoTrt_F |
| RAB3D    | 0.03862 | -0.6986 | 0.673 | 0.72 | 1 | HC_vs_MS.NoTrt_F |
| LRPPRC   | 0.03871 | -0.5625 | 0.532 | 0.58 | 1 | HC_vs_MS.NoTrt_F |

|          |         |         |       |      |   |                  |
|----------|---------|---------|-------|------|---|------------------|
| PPP2R5A  | 0.03892 | -1.2995 | 0.237 | 0.3  | 1 | HC_vs_MS.NoTrt_F |
| CAMSAP1  | 0.03895 | 0.35301 | 0.104 | 0.17 | 1 | HC_vs_MS.NoTrt_F |
| CEBPZ    | 0.039   | -0.6783 | 0.246 | 0.33 | 1 | HC_vs_MS.NoTrt_F |
| KTN1     | 0.03905 | -0.4239 | 0.604 | 0.71 | 1 | HC_vs_MS.NoTrt_F |
| MAPK6    | 0.03909 | -0.3295 | 0.54  | 0.59 | 1 | HC_vs_MS.NoTrt_F |
| CARD11   | 0.03909 | 0.62512 | 0.202 | 0.29 | 1 | HC_vs_MS.NoTrt_F |
| ZNF134   | 0.03909 | -0.3203 | 0.194 | 0.27 | 1 | HC_vs_MS.NoTrt_F |
| BCAT1    | 0.03914 | 0.31663 | 0.483 | 0.55 | 1 | HC_vs_MS.NoTrt_F |
| LRIF1    | 0.03916 | 0.3134  | 0.121 | 0.19 | 1 | HC_vs_MS.NoTrt_F |
| FEM1C    | 0.03917 | -0.5817 | 0.147 | 0.22 | 1 | HC_vs_MS.NoTrt_F |
| LPIN2    | 0.03937 | 0.31711 | 0.211 | 0.3  | 1 | HC_vs_MS.NoTrt_F |
| GIMAP2   | 0.0394  | -0.4055 | 0.887 | 0.91 | 1 | HC_vs_MS.NoTrt_F |
| BRPF3    | 0.03947 | 1.73573 | 0.066 | 0.12 | 1 | HC_vs_MS.NoTrt_F |
| ABCB10   | 0.03949 | -0.702  | 0.101 | 0.16 | 1 | HC_vs_MS.NoTrt_F |
| CWC27    | 0.03958 | 0.565   | 0.168 | 0.24 | 1 | HC_vs_MS.NoTrt_F |
| NRM      | 0.03959 | 0.52682 | 0.058 | 0.11 | 1 | HC_vs_MS.NoTrt_F |
| UBASH3B  | 0.03959 | -0.3865 | 0.439 | 0.51 | 1 | HC_vs_MS.NoTrt_F |
| SULT1A1  | 0.03967 | 0.29405 | 0.618 | 0.69 | 1 | HC_vs_MS.NoTrt_F |
| MACC1    | 0.0397  | 0.51734 | 0.786 | 0.69 | 1 | HC_vs_MS.NoTrt_F |
| SUPT16H  | 0.03973 | -0.4977 | 0.731 | 0.77 | 1 | HC_vs_MS.NoTrt_F |
| LRRC59   | 0.03993 | 0.29972 | 0.176 | 0.26 | 1 | HC_vs_MS.NoTrt_F |
| FBXO8    | 0.04006 | 1.13892 | 0.101 | 0.17 | 1 | HC_vs_MS.NoTrt_F |
| HIST1H1D | 0.04035 | 0.82844 | 0.095 | 0.16 | 1 | HC_vs_MS.NoTrt_F |
| DPM2     | 0.04037 | -0.6307 | 0.13  | 0.19 | 1 | HC_vs_MS.NoTrt_F |
| SIGIRR   | 0.04041 | 0.39281 | 0.358 | 0.48 | 1 | HC_vs_MS.NoTrt_F |
| TNFAIP1  | 0.04046 | 0.25488 | 0.113 | 0.18 | 1 | HC_vs_MS.NoTrt_F |
| KLHL28   | 0.04058 | -0.3949 | 0.382 | 0.43 | 1 | HC_vs_MS.NoTrt_F |
| LRRC14   | 0.0406  | 0.96104 | 0.121 | 0.19 | 1 | HC_vs_MS.NoTrt_F |
| BTRC     | 0.04061 | 0.37371 | 0.113 | 0.18 | 1 | HC_vs_MS.NoTrt_F |
| BAG1     | 0.04063 | 0.27057 | 0.954 | 0.97 | 1 | HC_vs_MS.NoTrt_F |
| APOE     | 0.04064 | 0.34319 | 0.792 | 0.81 | 1 | HC_vs_MS.NoTrt_F |
| AFMID    | 0.04065 | 0.30815 | 0.957 | 0.95 | 1 | HC_vs_MS.NoTrt_F |
| ZNF674   | 0.04085 | 0.59741 | 0.948 | 0.92 | 1 | HC_vs_MS.NoTrt_F |
| TINF2    | 0.04093 | -0.3554 | 0.818 | 0.88 | 1 | HC_vs_MS.NoTrt_F |
| BATF     | 0.04104 | 0.36924 | 0.24  | 0.34 | 1 | HC_vs_MS.NoTrt_F |
| TRA2A    | 0.04104 | -0.3029 | 0.772 | 0.81 | 1 | HC_vs_MS.NoTrt_F |
| FLYWCH2  | 0.04106 | 0.50321 | 0.107 | 0.17 | 1 | HC_vs_MS.NoTrt_F |
| NAPRT    | 0.04108 | 0.50815 | 0.214 | 0.3  | 1 | HC_vs_MS.NoTrt_F |
| GRK4     | 0.04118 | 0.27449 | 0.653 | 0.54 | 1 | HC_vs_MS.NoTrt_F |
| PRIM1    | 0.04122 | 0.39064 | 0.176 | 0.25 | 1 | HC_vs_MS.NoTrt_F |

|          |         |         |       |      |   |                  |
|----------|---------|---------|-------|------|---|------------------|
| CHST7    | 0.0413  | 0.74884 | 0.092 | 0.16 | 1 | HC_vs_MS.NoTrt_F |
| SEC61A2  | 0.0413  | 0.32324 | 0.113 | 0.18 | 1 | HC_vs_MS.NoTrt_F |
| CSTF2T   | 0.04137 | -0.3111 | 0.13  | 0.2  | 1 | HC_vs_MS.NoTrt_F |
| TASP1    | 0.0415  | -0.2868 | 0.15  | 0.22 | 1 | HC_vs_MS.NoTrt_F |
| SELP     | 0.04152 | 1.42467 | 0.095 | 0.16 | 1 | HC_vs_MS.NoTrt_F |
| KSR1     | 0.04154 | 1.17404 | 0.28  | 0.38 | 1 | HC_vs_MS.NoTrt_F |
| PCBP4    | 0.04156 | 0.43583 | 0.113 | 0.18 | 1 | HC_vs_MS.NoTrt_F |
| RCCD1    | 0.04173 | -0.7161 | 0.202 | 0.27 | 1 | HC_vs_MS.NoTrt_F |
| IMMP2L   | 0.04174 | -0.3838 | 0.127 | 0.19 | 1 | HC_vs_MS.NoTrt_F |
| DYRK2    | 0.04178 | 0.4482  | 0.173 | 0.25 | 1 | HC_vs_MS.NoTrt_F |
| FER1L5   | 0.04179 | 0.35689 | 0.824 | 0.83 | 1 | HC_vs_MS.NoTrt_F |
| SERPINB8 | 0.04193 | -0.9651 | 0.064 | 0.12 | 1 | HC_vs_MS.NoTrt_F |
| MST1     | 0.042   | 0.26307 | 0.055 | 0.11 | 1 | HC_vs_MS.NoTrt_F |
| TMTC2    | 0.04207 | 0.49028 | 0.095 | 0.16 | 1 | HC_vs_MS.NoTrt_F |
| SCFD1    | 0.0421  | 0.65266 | 0.798 | 0.76 | 1 | HC_vs_MS.NoTrt_F |
| TNF      | 0.0421  | 0.54519 | 0.156 | 0.23 | 1 | HC_vs_MS.NoTrt_F |
| HDAC8    | 0.04236 | 0.85705 | 0.243 | 0.34 | 1 | HC_vs_MS.NoTrt_F |
| USPL1    | 0.04246 | 0.41323 | 0.142 | 0.21 | 1 | HC_vs_MS.NoTrt_F |
| SLC35E2B | 0.04255 | 0.54689 | 0.616 | 0.69 | 1 | HC_vs_MS.NoTrt_F |
| SNX8     | 0.04278 | -1.1827 | 0.15  | 0.22 | 1 | HC_vs_MS.NoTrt_F |
| KLHL33   | 0.04283 | 0.59024 | 0.59  | 0.49 | 1 | HC_vs_MS.NoTrt_F |
| HBA2     | 0.04286 | -2.932  | 0.055 | 0.11 | 1 | HC_vs_MS.NoTrt_F |
| VPS13D   | 0.04287 | -0.4918 | 0.344 | 0.41 | 1 | HC_vs_MS.NoTrt_F |
| CTDP1    | 0.04293 | 1.49232 | 0.078 | 0.14 | 1 | HC_vs_MS.NoTrt_F |
| GATA3    | 0.04305 | 0.27648 | 0.355 | 0.46 | 1 | HC_vs_MS.NoTrt_F |
| STAT4    | 0.04305 | 0.88156 | 0.439 | 0.39 | 1 | HC_vs_MS.NoTrt_F |
| CLIC2    | 0.04311 | -0.2937 | 0.448 | 0.53 | 1 | HC_vs_MS.NoTrt_F |
| UNG      | 0.04315 | -0.6189 | 0.24  | 0.32 | 1 | HC_vs_MS.NoTrt_F |
| CBFB     | 0.04315 | 0.76214 | 0.182 | 0.26 | 1 | HC_vs_MS.NoTrt_F |
| RAB43    | 0.04322 | 1.05731 | 0.228 | 0.31 | 1 | HC_vs_MS.NoTrt_F |
| MTSS1    | 0.04326 | 1.31712 | 0.708 | 0.67 | 1 | HC_vs_MS.NoTrt_F |
| SMARCD1  | 0.04334 | 0.48282 | 0.139 | 0.21 | 1 | HC_vs_MS.NoTrt_F |
| RNF26    | 0.04341 | 0.47558 | 0.127 | 0.19 | 1 | HC_vs_MS.NoTrt_F |
| AHNAK    | 0.04345 | 0.43548 | 0.89  | 0.9  | 1 | HC_vs_MS.NoTrt_F |
| MROH7    | 0.04349 | 0.28847 | 0.613 | 0.53 | 1 | HC_vs_MS.NoTrt_F |
| WDR5     | 0.04354 | 0.32609 | 0.139 | 0.21 | 1 | HC_vs_MS.NoTrt_F |
| SAP130   | 0.04375 | 0.33159 | 0.194 | 0.28 | 1 | HC_vs_MS.NoTrt_F |
| MOGS     | 0.04376 | 0.29598 | 0.121 | 0.19 | 1 | HC_vs_MS.NoTrt_F |
| GREB1    | 0.04379 | 0.35042 | 0.85  | 0.82 | 1 | HC_vs_MS.NoTrt_F |
| CCNJ     | 0.04383 | 0.41305 | 0.075 | 0.13 | 1 | HC_vs_MS.NoTrt_F |

|          |         |         |       |      |   |                  |
|----------|---------|---------|-------|------|---|------------------|
| LYG2     | 0.04401 | 0.64167 | 0.075 | 0.13 | 1 | HC_vs_MS.NoTrt_F |
| NMI      | 0.04402 | -0.6038 | 0.309 | 0.38 | 1 | HC_vs_MS.NoTrt_F |
| ME2      | 0.04416 | 0.39321 | 0.939 | 0.92 | 1 | HC_vs_MS.NoTrt_F |
| SLC8B1   | 0.04426 | -0.4027 | 0.538 | 0.59 | 1 | HC_vs_MS.NoTrt_F |
| PHKA2    | 0.04429 | 0.33791 | 0.734 | 0.82 | 1 | HC_vs_MS.NoTrt_F |
| RBM45    | 0.04432 | 0.91995 | 0.095 | 0.16 | 1 | HC_vs_MS.NoTrt_F |
| CHD6     | 0.04436 | -0.3353 | 0.251 | 0.33 | 1 | HC_vs_MS.NoTrt_F |
| HAUS8    | 0.04441 | -0.3656 | 0.751 | 0.79 | 1 | HC_vs_MS.NoTrt_F |
| ADCY2    | 0.04452 | 0.26884 | 0.815 | 0.8  | 1 | HC_vs_MS.NoTrt_F |
| CHN1     | 0.04456 | 0.3436  | 0.072 | 0.13 | 1 | HC_vs_MS.NoTrt_F |
| GPR63    | 0.04456 | -0.28   | 0.39  | 0.47 | 1 | HC_vs_MS.NoTrt_F |
| NEO1     | 0.04466 | 0.30946 | 0.266 | 0.36 | 1 | HC_vs_MS.NoTrt_F |
| MBIP     | 0.04476 | 0.88785 | 0.098 | 0.16 | 1 | HC_vs_MS.NoTrt_F |
| SYNGAP1  | 0.04476 | 0.42414 | 0.185 | 0.27 | 1 | HC_vs_MS.NoTrt_F |
| CXorf40A | 0.04485 | 0.25419 | 0.188 | 0.27 | 1 | HC_vs_MS.NoTrt_F |
| HGSNAT   | 0.04492 | 0.85697 | 0.772 | 0.73 | 1 | HC_vs_MS.NoTrt_F |
| KIRREL3  | 0.04493 | 0.33166 | 0.618 | 0.55 | 1 | HC_vs_MS.NoTrt_F |
| MCTP2    | 0.04494 | 0.88734 | 0.564 | 0.46 | 1 | HC_vs_MS.NoTrt_F |
| IFI27L2  | 0.04495 | -0.4843 | 0.251 | 0.32 | 1 | HC_vs_MS.NoTrt_F |
| PIGM     | 0.04499 | 0.76237 | 0.679 | 0.59 | 1 | HC_vs_MS.NoTrt_F |
| GLRX5    | 0.04499 | -0.6591 | 0.101 | 0.16 | 1 | HC_vs_MS.NoTrt_F |
| STX5     | 0.04503 | 0.74289 | 0.159 | 0.23 | 1 | HC_vs_MS.NoTrt_F |
| XRCC4    | 0.04505 | 1.22598 | 0.084 | 0.14 | 1 | HC_vs_MS.NoTrt_F |
| TBCC     | 0.04506 | -0.2565 | 0.341 | 0.42 | 1 | HC_vs_MS.NoTrt_F |
| ZNF827   | 0.04508 | 1.10126 | 0.055 | 0.11 | 1 | HC_vs_MS.NoTrt_F |
| ZNF365   | 0.04528 | -0.557  | 0.35  | 0.46 | 1 | HC_vs_MS.NoTrt_F |
| TRAK2    | 0.04529 | -0.3333 | 0.223 | 0.29 | 1 | HC_vs_MS.NoTrt_F |
| BLOC1S1  | 0.0453  | 0.25113 | 0.254 | 0.35 | 1 | HC_vs_MS.NoTrt_F |
| OXSM     | 0.04534 | -0.8924 | 0.153 | 0.22 | 1 | HC_vs_MS.NoTrt_F |
| NWD1     | 0.04537 | -0.3588 | 0.627 | 0.53 | 1 | HC_vs_MS.NoTrt_F |
| RAP1GDS1 | 0.04554 | 0.34918 | 0.379 | 0.5  | 1 | HC_vs_MS.NoTrt_F |
| ALG2     | 0.04573 | 0.30205 | 0.11  | 0.17 | 1 | HC_vs_MS.NoTrt_F |
| MBD4     | 0.04586 | -0.2605 | 0.263 | 0.33 | 1 | HC_vs_MS.NoTrt_F |
| STAU2    | 0.04608 | -0.4027 | 0.656 | 0.71 | 1 | HC_vs_MS.NoTrt_F |
| LYL1     | 0.04615 | 0.26091 | 0.486 | 0.57 | 1 | HC_vs_MS.NoTrt_F |
| TRMT44   | 0.04632 | -0.3068 | 0.28  | 0.37 | 1 | HC_vs_MS.NoTrt_F |
| TSPAN5   | 0.0464  | -0.3805 | 0.645 | 0.67 | 1 | HC_vs_MS.NoTrt_F |
| PCCB     | 0.04647 | 0.78131 | 0.679 | 0.66 | 1 | HC_vs_MS.NoTrt_F |
| CD81     | 0.04652 | 1.35189 | 0.055 | 0.11 | 1 | HC_vs_MS.NoTrt_F |
| PELP1    | 0.04657 | 0.66775 | 0.277 | 0.36 | 1 | HC_vs_MS.NoTrt_F |

|          |         |         |       |      |   |                  |
|----------|---------|---------|-------|------|---|------------------|
| KANSL2   | 0.04665 | 0.52591 | 0.188 | 0.27 | 1 | HC_vs_MS.NoTrt_F |
| PPP3R1   | 0.04666 | -0.6413 | 0.173 | 0.24 | 1 | HC_vs_MS.NoTrt_F |
| HACD1    | 0.04681 | -0.6411 | 0.636 | 0.71 | 1 | HC_vs_MS.NoTrt_F |
| FASTKD1  | 0.04689 | -0.3815 | 0.306 | 0.39 | 1 | HC_vs_MS.NoTrt_F |
| ZNF747   | 0.04693 | 0.30458 | 0.751 | 0.66 | 1 | HC_vs_MS.NoTrt_F |
| FBXO48   | 0.04706 | -0.5914 | 0.694 | 0.8  | 1 | HC_vs_MS.NoTrt_F |
| GATAD2B  | 0.04709 | 0.36442 | 0.5   | 0.65 | 1 | HC_vs_MS.NoTrt_F |
| TFIP11   | 0.04709 | -1.0429 | 0.549 | 0.61 | 1 | HC_vs_MS.NoTrt_F |
| CTBS     | 0.04717 | 0.39761 | 0.147 | 0.22 | 1 | HC_vs_MS.NoTrt_F |
| PLIN5    | 0.04733 | 0.3001  | 0.864 | 0.8  | 1 | HC_vs_MS.NoTrt_F |
| CD8A     | 0.04738 | 1.65464 | 0.081 | 0.14 | 1 | HC_vs_MS.NoTrt_F |
| IGFLR1   | 0.0474  | 0.51971 | 0.578 | 0.71 | 1 | HC_vs_MS.NoTrt_F |
| GP1BA    | 0.04751 | 0.92711 | 0.055 | 0.11 | 1 | HC_vs_MS.NoTrt_F |
| VPS4B    | 0.04757 | -0.2847 | 0.803 | 0.8  | 1 | HC_vs_MS.NoTrt_F |
| MYSM1    | 0.04758 | 0.31333 | 0.269 | 0.35 | 1 | HC_vs_MS.NoTrt_F |
| DPH2     | 0.04768 | 0.67388 | 0.098 | 0.16 | 1 | HC_vs_MS.NoTrt_F |
| ZNF41    | 0.0477  | 1.30716 | 0.055 | 0.11 | 1 | HC_vs_MS.NoTrt_F |
| LTB4R    | 0.04774 | -0.3779 | 0.376 | 0.45 | 1 | HC_vs_MS.NoTrt_F |
| PCNX3    | 0.0478  | 0.76669 | 0.159 | 0.23 | 1 | HC_vs_MS.NoTrt_F |
| GFRAL    | 0.04809 | 0.32603 | 0.465 | 0.39 | 1 | HC_vs_MS.NoTrt_F |
| UQCRC1   | 0.04826 | 0.29227 | 0.263 | 0.37 | 1 | HC_vs_MS.NoTrt_F |
| N6AMT1   | 0.04827 | -0.5673 | 0.159 | 0.23 | 1 | HC_vs_MS.NoTrt_F |
| NEMP2    | 0.04842 | 0.28917 | 0.118 | 0.18 | 1 | HC_vs_MS.NoTrt_F |
| SCOC     | 0.04844 | 0.25063 | 0.127 | 0.19 | 1 | HC_vs_MS.NoTrt_F |
| ATL3     | 0.04858 | -0.5557 | 0.838 | 0.87 | 1 | HC_vs_MS.NoTrt_F |
| C17orf51 | 0.04862 | -0.5251 | 0.408 | 0.48 | 1 | HC_vs_MS.NoTrt_F |
| ZNF22    | 0.04863 | 0.51073 | 0.118 | 0.18 | 1 | HC_vs_MS.NoTrt_F |
| SYNE1    | 0.04878 | 0.41482 | 0.965 | 0.96 | 1 | HC_vs_MS.NoTrt_F |
| LMLN     | 0.0488  | -1.363  | 0.419 | 0.5  | 1 | HC_vs_MS.NoTrt_F |
| YTHDC1   | 0.04881 | -0.2732 | 0.512 | 0.6  | 1 | HC_vs_MS.NoTrt_F |
| SPACA6   | 0.04898 | 0.28832 | 0.893 | 0.91 | 1 | HC_vs_MS.NoTrt_F |
| NAIP     | 0.04908 | -0.4847 | 0.743 | 0.76 | 1 | HC_vs_MS.NoTrt_F |
| FAM234A  | 0.0491  | 0.28628 | 0.272 | 0.36 | 1 | HC_vs_MS.NoTrt_F |
| ACVR2A   | 0.04911 | -0.4794 | 0.315 | 0.4  | 1 | HC_vs_MS.NoTrt_F |
| MCU      | 0.04917 | 0.47329 | 0.257 | 0.35 | 1 | HC_vs_MS.NoTrt_F |
| MRPS9    | 0.04922 | 0.30224 | 0.168 | 0.24 | 1 | HC_vs_MS.NoTrt_F |
| PLRG1    | 0.04939 | 0.3074  | 0.145 | 0.22 | 1 | HC_vs_MS.NoTrt_F |
| GRIN2B   | 0.04939 | 0.48207 | 0.237 | 0.32 | 1 | HC_vs_MS.NoTrt_F |
| CCDC25   | 0.04946 | -0.2976 | 0.286 | 0.37 | 1 | HC_vs_MS.NoTrt_F |
| SS18     | 0.0495  | -0.3058 | 0.647 | 0.7  | 1 | HC_vs_MS.NoTrt_F |

|            |         |         |       |      |   |                  |
|------------|---------|---------|-------|------|---|------------------|
| UBE2E3     | 0.04966 | 0.98848 | 0.072 | 0.13 | 1 | HC_vs_MS.NoTrt_F |
| NOB1       | 0.04972 | -0.4109 | 0.199 | 0.27 | 1 | HC_vs_MS.NoTrt_F |
| NEK8       | 0.04979 | -0.8507 | 0.621 | 0.67 | 1 | HC_vs_MS.NoTrt_F |
| ISOC2      | 0.04993 | 1.28075 | 0.072 | 0.13 | 1 | HC_vs_MS.NoTrt_F |
| AL109923.1 | 0.04994 | 0.36862 | 0.09  | 0.15 | 1 | HC_vs_MS.NoTrt_F |
| S100B      | 0.05011 | 0.61637 | 0.153 | 0.23 | 1 | HC_vs_MS.NoTrt_F |
| TNS1       | 0.05016 | 0.972   | 0.39  | 0.31 | 1 | HC_vs_MS.NoTrt_F |
| NEIL2      | 0.05019 | 0.61478 | 0.124 | 0.19 | 1 | HC_vs_MS.NoTrt_F |
| SMG1       | 0.05024 | 0.33578 | 0.986 | 0.98 | 1 | HC_vs_MS.NoTrt_F |
| SH3BP1     | 0.05041 | -0.3777 | 0.156 | 0.23 | 1 | HC_vs_MS.NoTrt_F |
| NSFL1C     | 0.05042 | 0.30006 | 0.173 | 0.25 | 1 | HC_vs_MS.NoTrt_F |
| SF3B4      | 0.05046 | -0.4734 | 0.243 | 0.32 | 1 | HC_vs_MS.NoTrt_F |
| CNNM2      | 0.05053 | 1.86139 | 0.341 | 0.43 | 1 | HC_vs_MS.NoTrt_F |
| ERF        | 0.05065 | 0.99212 | 0.11  | 0.18 | 1 | HC_vs_MS.NoTrt_F |
| MFSD14C    | 0.05069 | 0.30099 | 0.746 | 0.73 | 1 | HC_vs_MS.NoTrt_F |
| STMND1     | 0.05076 | 0.25786 | 0.867 | 0.83 | 1 | HC_vs_MS.NoTrt_F |
| PRKACA     | 0.05085 | -0.3647 | 0.249 | 0.33 | 1 | HC_vs_MS.NoTrt_F |
| EPN3       | 0.05094 | 0.35034 | 0.081 | 0.14 | 1 | HC_vs_MS.NoTrt_F |
| ZNF569     | 0.05096 | 0.52441 | 0.228 | 0.3  | 1 | HC_vs_MS.NoTrt_F |
| AFF3       | 0.05099 | 0.75563 | 0.806 | 0.74 | 1 | HC_vs_MS.NoTrt_F |
| WDR5B      | 0.05102 | -0.7684 | 0.24  | 0.3  | 1 | HC_vs_MS.NoTrt_F |
| CAPN15     | 0.05112 | 0.9615  | 0.205 | 0.29 | 1 | HC_vs_MS.NoTrt_F |
| TRIP12     | 0.05118 | -0.3096 | 0.543 | 0.6  | 1 | HC_vs_MS.NoTrt_F |
| ATMIN      | 0.05124 | -0.3348 | 0.28  | 0.35 | 1 | HC_vs_MS.NoTrt_F |
| GEMIN8     | 0.05125 | 0.32013 | 0.078 | 0.13 | 1 | HC_vs_MS.NoTrt_F |
| RANBP9     | 0.0513  | 0.37249 | 0.266 | 0.37 | 1 | HC_vs_MS.NoTrt_F |
| CABYR      | 0.05135 | 0.44016 | 0.584 | 0.51 | 1 | HC_vs_MS.NoTrt_F |
| HLA-DMB    | 0.05136 | 0.33319 | 0.107 | 0.17 | 1 | HC_vs_MS.NoTrt_F |
| BAG3       | 0.05144 | 0.49279 | 0.118 | 0.19 | 1 | HC_vs_MS.NoTrt_F |
| ESD        | 0.05154 | 0.31245 | 0.191 | 0.27 | 1 | HC_vs_MS.NoTrt_F |
| STARD9     | 0.05161 | 0.61589 | 0.931 | 0.91 | 1 | HC_vs_MS.NoTrt_F |
| OCLN       | 0.05175 | 0.5049  | 0.812 | 0.82 | 1 | HC_vs_MS.NoTrt_F |
| ZNF770     | 0.05203 | -0.529  | 0.35  | 0.41 | 1 | HC_vs_MS.NoTrt_F |
| AMOTL1     | 0.05204 | -0.9341 | 0.075 | 0.13 | 1 | HC_vs_MS.NoTrt_F |
| ZNF181     | 0.0521  | -1.4208 | 0.194 | 0.27 | 1 | HC_vs_MS.NoTrt_F |
| DCTN3      | 0.0522  | -0.2943 | 0.402 | 0.49 | 1 | HC_vs_MS.NoTrt_F |
| RCAN1      | 0.05238 | 0.65579 | 0.39  | 0.48 | 1 | HC_vs_MS.NoTrt_F |
| ADCY3      | 0.05242 | 0.31732 | 0.11  | 0.17 | 1 | HC_vs_MS.NoTrt_F |
| HAUS7      | 0.05244 | -0.9888 | 0.147 | 0.21 | 1 | HC_vs_MS.NoTrt_F |
| GSG1       | 0.05266 | 0.54104 | 0.627 | 0.59 | 1 | HC_vs_MS.NoTrt_F |



|          |         |         |       |      |   |                  |
|----------|---------|---------|-------|------|---|------------------|
| RNF213   | 0.05266 | 0.26904 | 0.994 | 0.99 | 1 | HC_vs_MS.NoTrt_F |
| UNC45B   | 0.05299 | -0.7097 | 0.142 | 0.21 | 1 | HC_vs_MS.NoTrt_F |
| NCOR2    | 0.0531  | 1.20536 | 0.552 | 0.5  | 1 | HC_vs_MS.NoTrt_F |
| TRAK1    | 0.05313 | 0.40952 | 0.136 | 0.19 | 1 | HC_vs_MS.NoTrt_F |
| SLC13A4  | 0.05337 | 0.55235 | 0.373 | 0.46 | 1 | HC_vs_MS.NoTrt_F |
| CLASP1   | 0.05357 | 0.43383 | 0.312 | 0.4  | 1 | HC_vs_MS.NoTrt_F |
| PRAF2    | 0.0536  | 0.51614 | 0.136 | 0.2  | 1 | HC_vs_MS.NoTrt_F |
| AEN      | 0.05363 | 0.89404 | 0.153 | 0.23 | 1 | HC_vs_MS.NoTrt_F |
| PIP5KL1  | 0.05371 | 0.40795 | 0.503 | 0.58 | 1 | HC_vs_MS.NoTrt_F |
| CGNL1    | 0.05383 | -0.5894 | 0.347 | 0.41 | 1 | HC_vs_MS.NoTrt_F |
| PAXBP1   | 0.05384 | -0.5848 | 0.223 | 0.29 | 1 | HC_vs_MS.NoTrt_F |
| C4BPA    | 0.05384 | -0.3165 | 0.361 | 0.45 | 1 | HC_vs_MS.NoTrt_F |
| SHPRH    | 0.05385 | -0.3894 | 0.751 | 0.77 | 1 | HC_vs_MS.NoTrt_F |
| ZNF254   | 0.05389 | -0.4182 | 0.416 | 0.48 | 1 | HC_vs_MS.NoTrt_F |
| GIN1     | 0.05399 | -0.582  | 0.379 | 0.46 | 1 | HC_vs_MS.NoTrt_F |
| XRCC1    | 0.05408 | 0.48151 | 0.228 | 0.31 | 1 | HC_vs_MS.NoTrt_F |
| ZNF195   | 0.0541  | 0.54142 | 0.621 | 0.67 | 1 | HC_vs_MS.NoTrt_F |
| PFAS     | 0.05428 | -0.5493 | 0.662 | 0.58 | 1 | HC_vs_MS.NoTrt_F |
| GPX1     | 0.05428 | 0.35926 | 0.205 | 0.29 | 1 | HC_vs_MS.NoTrt_F |
| LSM2     | 0.05428 | 0.256   | 0.197 | 0.28 | 1 | HC_vs_MS.NoTrt_F |
| ZC4H2    | 0.05437 | 1.06374 | 0.107 | 0.17 | 1 | HC_vs_MS.NoTrt_F |
| SLC11A1  | 0.05445 | 0.30653 | 0.954 | 0.93 | 1 | HC_vs_MS.NoTrt_F |
| WDR48    | 0.05459 | -0.3809 | 0.211 | 0.28 | 1 | HC_vs_MS.NoTrt_F |
| MIS18BP1 | 0.0546  | -0.9071 | 0.679 | 0.71 | 1 | HC_vs_MS.NoTrt_F |
| FASTK    | 0.05461 | 0.422   | 0.188 | 0.27 | 1 | HC_vs_MS.NoTrt_F |
| UQCR10   | 0.05462 | 0.30309 | 0.364 | 0.48 | 1 | HC_vs_MS.NoTrt_F |
| TAB1     | 0.05465 | 0.28221 | 0.121 | 0.18 | 1 | HC_vs_MS.NoTrt_F |
| INPPL1   | 0.05476 | 0.8225  | 0.121 | 0.19 | 1 | HC_vs_MS.NoTrt_F |
| TOM1     | 0.05487 | 0.28151 | 0.335 | 0.43 | 1 | HC_vs_MS.NoTrt_F |
| TMUB1    | 0.0549  | 0.53994 | 0.139 | 0.21 | 1 | HC_vs_MS.NoTrt_F |
| CDC34    | 0.05495 | 0.54298 | 0.061 | 0.11 | 1 | HC_vs_MS.NoTrt_F |
| BACH1    | 0.05499 | -0.378  | 0.303 | 0.39 | 1 | HC_vs_MS.NoTrt_F |
| OSTM1    | 0.05501 | -0.8822 | 0.795 | 0.85 | 1 | HC_vs_MS.NoTrt_F |
| TRMT1    | 0.05516 | 0.26964 | 0.162 | 0.23 | 1 | HC_vs_MS.NoTrt_F |
| SNAP29   | 0.05521 | -0.5893 | 0.72  | 0.77 | 1 | HC_vs_MS.NoTrt_F |
| PSMA2    | 0.05533 | 0.34976 | 0.595 | 0.66 | 1 | HC_vs_MS.NoTrt_F |
| PARP15   | 0.05538 | 0.53411 | 0.942 | 0.93 | 1 | HC_vs_MS.NoTrt_F |
| ASB7     | 0.05549 | 0.76987 | 0.11  | 0.17 | 1 | HC_vs_MS.NoTrt_F |
| NR1H3    | 0.0555  | 1.82807 | 0.15  | 0.22 | 1 | HC_vs_MS.NoTrt_F |
| CASS4    | 0.05572 | 0.68571 | 0.566 | 0.49 | 1 | HC_vs_MS.NoTrt_F |

|            |         |         |       |      |   |                  |
|------------|---------|---------|-------|------|---|------------------|
| NSG1       | 0.05581 | -0.2653 | 0.668 | 0.74 | 1 | HC_vs_MS.NoTrt_F |
| RP11-701H2 | 0.05584 | -0.4837 | 0.136 | 0.19 | 1 | HC_vs_MS.NoTrt_F |
| C16orf54   | 0.0559  | 0.2529  | 0.737 | 0.87 | 1 | HC_vs_MS.NoTrt_F |
| EPHA1      | 0.05591 | 0.44058 | 0.39  | 0.48 | 1 | HC_vs_MS.NoTrt_F |
| CASP7      | 0.05595 | -0.567  | 0.191 | 0.26 | 1 | HC_vs_MS.NoTrt_F |
| APOPT1     | 0.05605 | 0.26966 | 0.931 | 0.9  | 1 | HC_vs_MS.NoTrt_F |
| TRPS1      | 0.05621 | 0.3587  | 0.127 | 0.19 | 1 | HC_vs_MS.NoTrt_F |
| TDRD1      | 0.05623 | 0.70821 | 0.225 | 0.3  | 1 | HC_vs_MS.NoTrt_F |
| SORBS3     | 0.05623 | 1.06598 | 0.078 | 0.13 | 1 | HC_vs_MS.NoTrt_F |
| PNKP       | 0.05624 | 0.8187  | 0.327 | 0.41 | 1 | HC_vs_MS.NoTrt_F |
| ZNF571     | 0.0563  | -0.6923 | 0.434 | 0.54 | 1 | HC_vs_MS.NoTrt_F |
| KIAA1143   | 0.05638 | -0.6561 | 0.523 | 0.61 | 1 | HC_vs_MS.NoTrt_F |
| ATG101     | 0.05646 | -0.4185 | 0.113 | 0.17 | 1 | HC_vs_MS.NoTrt_F |
| SLC25A6    | 0.05661 | 0.26453 | 0.523 | 0.7  | 1 | HC_vs_MS.NoTrt_F |
| STRBP      | 0.05665 | -0.5709 | 0.65  | 0.72 | 1 | HC_vs_MS.NoTrt_F |
| NCAPG2     | 0.05669 | 1.04254 | 0.202 | 0.28 | 1 | HC_vs_MS.NoTrt_F |
| AP1AR      | 0.05675 | 0.32588 | 0.107 | 0.17 | 1 | HC_vs_MS.NoTrt_F |
| SMC4       | 0.05694 | -0.3944 | 0.483 | 0.55 | 1 | HC_vs_MS.NoTrt_F |
| SH2D2A     | 0.057   | 1.08367 | 0.488 | 0.47 | 1 | HC_vs_MS.NoTrt_F |
| SGSM1      | 0.057   | -0.3033 | 0.543 | 0.58 | 1 | HC_vs_MS.NoTrt_F |
| ERO1B      | 0.05702 | 0.61603 | 0.133 | 0.2  | 1 | HC_vs_MS.NoTrt_F |
| ETS1       | 0.05708 | -0.3027 | 0.986 | 0.98 | 1 | HC_vs_MS.NoTrt_F |
| ARHGEF2    | 0.05709 | 0.48022 | 0.275 | 0.35 | 1 | HC_vs_MS.NoTrt_F |
| CRADD      | 0.05714 | 0.57948 | 0.107 | 0.17 | 1 | HC_vs_MS.NoTrt_F |
| YY1        | 0.05718 | 0.39838 | 0.35  | 0.43 | 1 | HC_vs_MS.NoTrt_F |
| TMEM185A   | 0.05721 | 0.26761 | 0.587 | 0.48 | 1 | HC_vs_MS.NoTrt_F |
| HIST1H3E   | 0.05733 | -0.6568 | 0.136 | 0.2  | 1 | HC_vs_MS.NoTrt_F |
| UBL3       | 0.05737 | 0.30621 | 0.197 | 0.27 | 1 | HC_vs_MS.NoTrt_F |
| AHCY       | 0.05737 | 0.49948 | 0.098 | 0.16 | 1 | HC_vs_MS.NoTrt_F |
| IDI1       | 0.05747 | 0.25691 | 0.243 | 0.33 | 1 | HC_vs_MS.NoTrt_F |
| RBM10      | 0.05762 | 0.29276 | 0.205 | 0.28 | 1 | HC_vs_MS.NoTrt_F |
| SNAPC1     | 0.05762 | -0.3628 | 0.705 | 0.82 | 1 | HC_vs_MS.NoTrt_F |
| NOL10      | 0.05769 | -0.4085 | 0.202 | 0.27 | 1 | HC_vs_MS.NoTrt_F |
| KIAA1210   | 0.05773 | -0.2657 | 0.275 | 0.34 | 1 | HC_vs_MS.NoTrt_F |
| CLIP4      | 0.05774 | -0.336  | 0.162 | 0.23 | 1 | HC_vs_MS.NoTrt_F |
| SMAGP      | 0.05776 | -0.4584 | 0.636 | 0.72 | 1 | HC_vs_MS.NoTrt_F |
| GSDMB      | 0.0578  | 0.52789 | 0.908 | 0.91 | 1 | HC_vs_MS.NoTrt_F |
| TMEM5      | 0.05786 | 0.91697 | 0.523 | 0.6  | 1 | HC_vs_MS.NoTrt_F |
| RBPM5      | 0.05789 | 1.81681 | 0.199 | 0.14 | 1 | HC_vs_MS.NoTrt_F |
| LIAS       | 0.0579  | -0.4368 | 0.133 | 0.19 | 1 | HC_vs_MS.NoTrt_F |

|         |         |         |       |      |   |                  |
|---------|---------|---------|-------|------|---|------------------|
| INTS10  | 0.05797 | -0.5481 | 0.613 | 0.69 | 1 | HC_vs_MS.NoTrt_F |
| FAM162A | 0.05798 | -0.3513 | 0.439 | 0.5  | 1 | HC_vs_MS.NoTrt_F |
| CNOT10  | 0.05805 | 0.42898 | 0.936 | 0.92 | 1 | HC_vs_MS.NoTrt_F |
| CCDC34  | 0.05806 | 0.36492 | 0.118 | 0.18 | 1 | HC_vs_MS.NoTrt_F |
| UTS2    | 0.0581  | 0.32894 | 0.124 | 0.19 | 1 | HC_vs_MS.NoTrt_F |
| COQ9    | 0.0582  | 0.2692  | 0.113 | 0.17 | 1 | HC_vs_MS.NoTrt_F |
| FUNDC2  | 0.05821 | -0.3399 | 0.561 | 0.62 | 1 | HC_vs_MS.NoTrt_F |
| STK25   | 0.05823 | -0.97   | 0.76  | 0.78 | 1 | HC_vs_MS.NoTrt_F |
| TRMT2B  | 0.05839 | -0.4771 | 0.731 | 0.81 | 1 | HC_vs_MS.NoTrt_F |
| PHF19   | 0.05847 | 0.27591 | 0.191 | 0.27 | 1 | HC_vs_MS.NoTrt_F |
| SNX22   | 0.05847 | -0.3185 | 0.838 | 0.81 | 1 | HC_vs_MS.NoTrt_F |
| NFIA    | 0.05849 | 0.90107 | 0.156 | 0.1  | 1 | HC_vs_MS.NoTrt_F |
| TICAM1  | 0.05851 | 0.5537  | 0.095 | 0.16 | 1 | HC_vs_MS.NoTrt_F |
| TSC1    | 0.05853 | 0.66732 | 0.48  | 0.56 | 1 | HC_vs_MS.NoTrt_F |
| SNAPC2  | 0.05868 | 0.50908 | 0.087 | 0.14 | 1 | HC_vs_MS.NoTrt_F |
| RNF144B | 0.05879 | 0.37215 | 0.312 | 0.41 | 1 | HC_vs_MS.NoTrt_F |
| AKAP10  | 0.05889 | -0.2714 | 0.538 | 0.57 | 1 | HC_vs_MS.NoTrt_F |
| PRR14   | 0.05892 | 0.58377 | 0.153 | 0.22 | 1 | HC_vs_MS.NoTrt_F |
| ZSCAN22 | 0.05895 | -1.0739 | 0.48  | 0.57 | 1 | HC_vs_MS.NoTrt_F |
| ACADM   | 0.05901 | 0.35487 | 0.231 | 0.32 | 1 | HC_vs_MS.NoTrt_F |
| VPS41   | 0.05903 | -0.2974 | 0.517 | 0.58 | 1 | HC_vs_MS.NoTrt_F |
| TRIP13  | 0.05905 | 0.32317 | 0.546 | 0.61 | 1 | HC_vs_MS.NoTrt_F |
| FABP7   | 0.0591  | -0.2698 | 0.197 | 0.26 | 1 | HC_vs_MS.NoTrt_F |
| IFI44L  | 0.05914 | 1.07098 | 0.228 | 0.32 | 1 | HC_vs_MS.NoTrt_F |
| PDXK    | 0.05931 | 1.08199 | 0.63  | 0.56 | 1 | HC_vs_MS.NoTrt_F |
| FGF23   | 0.05932 | 0.69161 | 0.925 | 0.85 | 1 | HC_vs_MS.NoTrt_F |
| STRN4   | 0.05935 | 1.03331 | 0.598 | 0.55 | 1 | HC_vs_MS.NoTrt_F |
| ACTG2   | 0.05942 | 0.73351 | 0.277 | 0.35 | 1 | HC_vs_MS.NoTrt_F |
| CYP4F8  | 0.05951 | 0.26835 | 0.847 | 0.8  | 1 | HC_vs_MS.NoTrt_F |
| RUNDC3A | 0.05954 | 0.41021 | 0.564 | 0.51 | 1 | HC_vs_MS.NoTrt_F |
| PCID2   | 0.05959 | -0.3563 | 0.361 | 0.43 | 1 | HC_vs_MS.NoTrt_F |
| LTN1    | 0.05972 | 0.67311 | 0.197 | 0.28 | 1 | HC_vs_MS.NoTrt_F |
| MRPL39  | 0.05987 | 0.42767 | 0.159 | 0.23 | 1 | HC_vs_MS.NoTrt_F |
| NOL7    | 0.05989 | 0.58888 | 0.257 | 0.36 | 1 | HC_vs_MS.NoTrt_F |
| NUDT21  | 0.05991 | -0.3772 | 0.725 | 0.8  | 1 | HC_vs_MS.NoTrt_F |
| CD300LG | 0.05998 | 0.812   | 0.523 | 0.46 | 1 | HC_vs_MS.NoTrt_F |
| TWISTNB | 0.06    | -0.4766 | 0.136 | 0.2  | 1 | HC_vs_MS.NoTrt_F |
| TATDN2  | 0.06002 | 0.25054 | 0.13  | 0.19 | 1 | HC_vs_MS.NoTrt_F |
| PALB2   | 0.06004 | -0.9604 | 0.254 | 0.32 | 1 | HC_vs_MS.NoTrt_F |
| EIF5A2  | 0.06018 | -0.4367 | 0.419 | 0.46 | 1 | HC_vs_MS.NoTrt_F |

|            |         |         |       |      |   |                  |
|------------|---------|---------|-------|------|---|------------------|
| CDC42BPB   | 0.06021 | 0.65315 | 0.081 | 0.13 | 1 | HC_vs_MS.NoTrt_F |
| C16orf72   | 0.06022 | 0.529   | 0.887 | 0.85 | 1 | HC_vs_MS.NoTrt_F |
| PARP6      | 0.06039 | -0.2741 | 0.697 | 0.8  | 1 | HC_vs_MS.NoTrt_F |
| SLC25A33   | 0.06049 | 0.65324 | 0.656 | 0.56 | 1 | HC_vs_MS.NoTrt_F |
| DCAF16     | 0.06052 | -0.4181 | 0.812 | 0.82 | 1 | HC_vs_MS.NoTrt_F |
| RASL10B    | 0.06056 | 0.2625  | 0.977 | 0.98 | 1 | HC_vs_MS.NoTrt_F |
| PLAC8      | 0.06058 | 0.82378 | 0.809 | 0.79 | 1 | HC_vs_MS.NoTrt_F |
| RING1      | 0.06071 | 0.7473  | 0.104 | 0.17 | 1 | HC_vs_MS.NoTrt_F |
| HSPD1      | 0.06076 | 0.2744  | 0.303 | 0.4  | 1 | HC_vs_MS.NoTrt_F |
| DPPA4      | 0.06079 | 0.30316 | 0.864 | 0.84 | 1 | HC_vs_MS.NoTrt_F |
| WAPL       | 0.06099 | -0.5783 | 0.523 | 0.58 | 1 | HC_vs_MS.NoTrt_F |
| COASY      | 0.0611  | -0.3381 | 0.46  | 0.53 | 1 | HC_vs_MS.NoTrt_F |
| SGTB       | 0.06125 | -0.3105 | 0.694 | 0.74 | 1 | HC_vs_MS.NoTrt_F |
| FANCL      | 0.06126 | -0.7175 | 0.173 | 0.24 | 1 | HC_vs_MS.NoTrt_F |
| AGAP4      | 0.06127 | 0.35417 | 0.254 | 0.34 | 1 | HC_vs_MS.NoTrt_F |
| PDIA4      | 0.06148 | 1.51041 | 0.101 | 0.16 | 1 | HC_vs_MS.NoTrt_F |
| RAB27A     | 0.06151 | -0.282  | 0.673 | 0.77 | 1 | HC_vs_MS.NoTrt_F |
| NDRG1      | 0.06158 | 0.62699 | 0.191 | 0.28 | 1 | HC_vs_MS.NoTrt_F |
| TP53I13    | 0.0616  | 0.37031 | 0.179 | 0.25 | 1 | HC_vs_MS.NoTrt_F |
| MVB12B     | 0.06162 | 0.26417 | 0.159 | 0.22 | 1 | HC_vs_MS.NoTrt_F |
| SEC11C     | 0.0618  | 0.26061 | 0.434 | 0.51 | 1 | HC_vs_MS.NoTrt_F |
| RP11-226E2 | 0.06187 | 0.36738 | 0.639 | 0.74 | 1 | HC_vs_MS.NoTrt_F |
| COQ3       | 0.06192 | 0.89513 | 0.251 | 0.33 | 1 | HC_vs_MS.NoTrt_F |
| AMMECR1    | 0.06198 | -0.4534 | 0.159 | 0.23 | 1 | HC_vs_MS.NoTrt_F |
| SLC22A23   | 0.06199 | 0.65292 | 0.101 | 0.16 | 1 | HC_vs_MS.NoTrt_F |
| TAF10      | 0.06231 | 0.27176 | 0.133 | 0.2  | 1 | HC_vs_MS.NoTrt_F |
| FAM104B    | 0.06232 | 0.4364  | 0.087 | 0.14 | 1 | HC_vs_MS.NoTrt_F |
| THUMP2     | 0.06242 | 0.46025 | 0.41  | 0.5  | 1 | HC_vs_MS.NoTrt_F |
| UGDH       | 0.06243 | -0.7922 | 0.584 | 0.67 | 1 | HC_vs_MS.NoTrt_F |
| CACNB3     | 0.06247 | 0.27501 | 0.633 | 0.7  | 1 | HC_vs_MS.NoTrt_F |
| ETV3       | 0.06252 | -0.2601 | 0.243 | 0.32 | 1 | HC_vs_MS.NoTrt_F |
| EFHD2      | 0.06269 | 0.33797 | 0.182 | 0.26 | 1 | HC_vs_MS.NoTrt_F |
| DEGS1      | 0.06283 | -0.4483 | 0.841 | 0.88 | 1 | HC_vs_MS.NoTrt_F |
| SERPINI1   | 0.06289 | -0.4826 | 0.095 | 0.15 | 1 | HC_vs_MS.NoTrt_F |
| PAG1       | 0.06305 | -0.3882 | 0.757 | 0.8  | 1 | HC_vs_MS.NoTrt_F |
| OPRM1      | 0.06306 | 0.30284 | 0.89  | 0.87 | 1 | HC_vs_MS.NoTrt_F |
| TCF4       | 0.06309 | 0.70212 | 0.818 | 0.76 | 1 | HC_vs_MS.NoTrt_F |
| MYO9A      | 0.06312 | -0.3162 | 0.402 | 0.49 | 1 | HC_vs_MS.NoTrt_F |
| MRPL46     | 0.06346 | -0.5983 | 0.26  | 0.33 | 1 | HC_vs_MS.NoTrt_F |
| NRF1       | 0.06346 | -0.8899 | 0.358 | 0.44 | 1 | HC_vs_MS.NoTrt_F |

|         |         |         |       |      |   |                  |
|---------|---------|---------|-------|------|---|------------------|
| GHRL    | 0.06354 | 0.72689 | 0.107 | 0.17 | 1 | HC_vs_MS.NoTrt_F |
| TBC1D20 | 0.06359 | 0.35481 | 0.694 | 0.61 | 1 | HC_vs_MS.NoTrt_F |
| INIP    | 0.06367 | -0.7128 | 0.757 | 0.81 | 1 | HC_vs_MS.NoTrt_F |
| ERCC6   | 0.06372 | -0.3497 | 0.275 | 0.34 | 1 | HC_vs_MS.NoTrt_F |
| GALK1   | 0.06403 | 1.52264 | 0.402 | 0.33 | 1 | HC_vs_MS.NoTrt_F |
| FAAP20  | 0.06406 | 0.29108 | 0.91  | 0.87 | 1 | HC_vs_MS.NoTrt_F |
| NRAS    | 0.06417 | 0.6194  | 0.361 | 0.46 | 1 | HC_vs_MS.NoTrt_F |
| FBRS    | 0.06424 | 0.36579 | 0.185 | 0.27 | 1 | HC_vs_MS.NoTrt_F |
| UBQLN1  | 0.06428 | -0.2757 | 0.306 | 0.39 | 1 | HC_vs_MS.NoTrt_F |
| FAM134A | 0.06447 | 0.26986 | 0.428 | 0.5  | 1 | HC_vs_MS.NoTrt_F |
| CAPRN2  | 0.06478 | -0.3625 | 0.757 | 0.8  | 1 | HC_vs_MS.NoTrt_F |
| REXO1   | 0.06487 | 0.99149 | 0.118 | 0.18 | 1 | HC_vs_MS.NoTrt_F |
| NOP16   | 0.06495 | 0.4359  | 0.228 | 0.3  | 1 | HC_vs_MS.NoTrt_F |
| TOB2    | 0.06502 | 0.43408 | 0.159 | 0.23 | 1 | HC_vs_MS.NoTrt_F |
| SIN3B   | 0.06514 | 0.76619 | 0.812 | 0.78 | 1 | HC_vs_MS.NoTrt_F |
| HS2ST1  | 0.06543 | -0.5357 | 0.127 | 0.18 | 1 | HC_vs_MS.NoTrt_F |
| CMTM3   | 0.06551 | 0.57308 | 0.243 | 0.33 | 1 | HC_vs_MS.NoTrt_F |
| ZMIZ2   | 0.06551 | 0.35137 | 0.199 | 0.28 | 1 | HC_vs_MS.NoTrt_F |
| PHF20L1 | 0.06557 | -0.7009 | 0.662 | 0.69 | 1 | HC_vs_MS.NoTrt_F |
| EPPIN   | 0.06557 | 0.37432 | 0.627 | 0.56 | 1 | HC_vs_MS.NoTrt_F |
| CYP7B1  | 0.06563 | 0.49018 | 0.457 | 0.54 | 1 | HC_vs_MS.NoTrt_F |
| PSMG1   | 0.06566 | -0.2642 | 0.188 | 0.26 | 1 | HC_vs_MS.NoTrt_F |
| RNF157  | 0.06567 | -0.251  | 0.653 | 0.74 | 1 | HC_vs_MS.NoTrt_F |
| XAF1    | 0.06569 | 0.37835 | 0.844 | 0.84 | 1 | HC_vs_MS.NoTrt_F |
| ERI3    | 0.06582 | -0.4715 | 0.142 | 0.2  | 1 | HC_vs_MS.NoTrt_F |
| GIPR    | 0.06587 | 0.29968 | 0.627 | 0.71 | 1 | HC_vs_MS.NoTrt_F |
| HCFC1R1 | 0.06588 | -0.2782 | 0.15  | 0.22 | 1 | HC_vs_MS.NoTrt_F |
| LIN37   | 0.06618 | 0.30181 | 0.104 | 0.16 | 1 | HC_vs_MS.NoTrt_F |
| CHD9    | 0.06645 | -0.5263 | 0.477 | 0.54 | 1 | HC_vs_MS.NoTrt_F |
| ADAM19  | 0.06665 | 0.33538 | 0.419 | 0.55 | 1 | HC_vs_MS.NoTrt_F |
| WARS2   | 0.06665 | 0.44447 | 0.11  | 0.17 | 1 | HC_vs_MS.NoTrt_F |
| CLTB    | 0.06698 | 0.5445  | 0.107 | 0.17 | 1 | HC_vs_MS.NoTrt_F |
| FAM20A  | 0.06709 | -0.8292 | 0.171 | 0.24 | 1 | HC_vs_MS.NoTrt_F |
| GSTM1   | 0.06722 | 0.60077 | 0.194 | 0.27 | 1 | HC_vs_MS.NoTrt_F |
| IER3IP1 | 0.06728 | 0.31285 | 0.182 | 0.25 | 1 | HC_vs_MS.NoTrt_F |
| FAM188B | 0.06767 | 0.52146 | 0.182 | 0.25 | 1 | HC_vs_MS.NoTrt_F |
| MRPL30  | 0.06771 | -0.6222 | 0.827 | 0.88 | 1 | HC_vs_MS.NoTrt_F |
| KLRC1   | 0.06778 | 0.5838  | 0.338 | 0.44 | 1 | HC_vs_MS.NoTrt_F |
| IVD     | 0.06804 | 0.42429 | 0.954 | 0.93 | 1 | HC_vs_MS.NoTrt_F |
| ZC3H18  | 0.06821 | 0.30614 | 0.766 | 0.83 | 1 | HC_vs_MS.NoTrt_F |

|          |         |         |       |      |   |                  |
|----------|---------|---------|-------|------|---|------------------|
| CCDC6    | 0.0683  | 0.97061 | 0.121 | 0.18 | 1 | HC_vs_MS.NoTrt_F |
| DHX8     | 0.06833 | -0.4796 | 0.691 | 0.73 | 1 | HC_vs_MS.NoTrt_F |
| NDUFAB1  | 0.06838 | 0.26127 | 0.275 | 0.36 | 1 | HC_vs_MS.NoTrt_F |
| PAPSS2   | 0.06839 | 0.50766 | 0.072 | 0.12 | 1 | HC_vs_MS.NoTrt_F |
| TMED3    | 0.06844 | 0.63417 | 0.699 | 0.65 | 1 | HC_vs_MS.NoTrt_F |
| RNF25    | 0.06845 | 0.31406 | 0.113 | 0.17 | 1 | HC_vs_MS.NoTrt_F |
| NPIPA5   | 0.06847 | 0.34942 | 0.104 | 0.16 | 1 | HC_vs_MS.NoTrt_F |
| DPH1     | 0.06848 | 0.35772 | 0.91  | 0.88 | 1 | HC_vs_MS.NoTrt_F |
| DAZAP1   | 0.0685  | -0.2666 | 0.194 | 0.27 | 1 | HC_vs_MS.NoTrt_F |
| MTERF3   | 0.06888 | -1.1351 | 0.283 | 0.34 | 1 | HC_vs_MS.NoTrt_F |
| SCO1     | 0.06889 | -0.5371 | 0.85  | 0.85 | 1 | HC_vs_MS.NoTrt_F |
| APOLD1   | 0.06897 | 0.63349 | 0.566 | 0.52 | 1 | HC_vs_MS.NoTrt_F |
| HTRA4    | 0.06897 | 0.30339 | 0.535 | 0.46 | 1 | HC_vs_MS.NoTrt_F |
| ZGRF1    | 0.06898 | 0.55885 | 0.85  | 0.83 | 1 | HC_vs_MS.NoTrt_F |
| CDR2     | 0.06898 | 1.34938 | 0.168 | 0.24 | 1 | HC_vs_MS.NoTrt_F |
| SPCS3    | 0.06907 | 0.27489 | 0.512 | 0.61 | 1 | HC_vs_MS.NoTrt_F |
| DNAL1    | 0.06913 | 0.48262 | 0.951 | 0.94 | 1 | HC_vs_MS.NoTrt_F |
| CIITA    | 0.06918 | -0.4382 | 0.962 | 0.9  | 1 | HC_vs_MS.NoTrt_F |
| VBP1     | 0.06919 | 0.66572 | 0.142 | 0.21 | 1 | HC_vs_MS.NoTrt_F |
| GGCX     | 0.06922 | 0.80139 | 0.934 | 0.95 | 1 | HC_vs_MS.NoTrt_F |
| FAM46A   | 0.06938 | -0.3846 | 0.113 | 0.17 | 1 | HC_vs_MS.NoTrt_F |
| UNK      | 0.06946 | 0.36122 | 0.127 | 0.19 | 1 | HC_vs_MS.NoTrt_F |
| MIIP     | 0.06946 | 0.27034 | 0.199 | 0.28 | 1 | HC_vs_MS.NoTrt_F |
| ZCCHC9   | 0.06955 | 0.27605 | 0.775 | 0.68 | 1 | HC_vs_MS.NoTrt_F |
| POU2AF1  | 0.06967 | 0.54925 | 0.766 | 0.73 | 1 | HC_vs_MS.NoTrt_F |
| SNRPG    | 0.06996 | 0.37894 | 0.329 | 0.45 | 1 | HC_vs_MS.NoTrt_F |
| HS1BP3   | 0.07007 | -0.3639 | 0.188 | 0.25 | 1 | HC_vs_MS.NoTrt_F |
| SVIL     | 0.07048 | 1.21552 | 0.185 | 0.26 | 1 | HC_vs_MS.NoTrt_F |
| VAT1     | 0.07052 | 0.41775 | 0.272 | 0.19 | 1 | HC_vs_MS.NoTrt_F |
| UAP1     | 0.07092 | 0.76553 | 0.092 | 0.15 | 1 | HC_vs_MS.NoTrt_F |
| UBL4A    | 0.07123 | 0.32537 | 0.118 | 0.18 | 1 | HC_vs_MS.NoTrt_F |
| UBP1     | 0.07135 | 0.69815 | 0.13  | 0.19 | 1 | HC_vs_MS.NoTrt_F |
| UNC50    | 0.07139 | 0.42307 | 0.142 | 0.2  | 1 | HC_vs_MS.NoTrt_F |
| PDE3B    | 0.07139 | -0.6067 | 0.613 | 0.63 | 1 | HC_vs_MS.NoTrt_F |
| SLC25A46 | 0.07159 | 0.52013 | 0.162 | 0.23 | 1 | HC_vs_MS.NoTrt_F |
| BTBD11   | 0.07161 | 0.97063 | 0.48  | 0.59 | 1 | HC_vs_MS.NoTrt_F |
| TMX3     | 0.07182 | -0.3261 | 0.462 | 0.56 | 1 | HC_vs_MS.NoTrt_F |
| AHSA1    | 0.07214 | -0.6292 | 0.587 | 0.61 | 1 | HC_vs_MS.NoTrt_F |
| DENND6A  | 0.07238 | -0.2806 | 0.595 | 0.66 | 1 | HC_vs_MS.NoTrt_F |
| SPOP     | 0.07253 | -0.3745 | 0.98  | 0.98 | 1 | HC_vs_MS.NoTrt_F |

|           |         |         |       |      |   |                  |
|-----------|---------|---------|-------|------|---|------------------|
| E2F6      | 0.07254 | -0.3853 | 0.272 | 0.34 | 1 | HC_vs_MS.NoTrt_F |
| CECR1     | 0.07269 | -0.3226 | 0.503 | 0.59 | 1 | HC_vs_MS.NoTrt_F |
| FBXO15    | 0.07287 | 0.42441 | 0.665 | 0.61 | 1 | HC_vs_MS.NoTrt_F |
| EXOC1     | 0.07294 | 0.35861 | 0.22  | 0.29 | 1 | HC_vs_MS.NoTrt_F |
| UBXN7     | 0.07295 | 0.35812 | 0.795 | 0.88 | 1 | HC_vs_MS.NoTrt_F |
| MRE11A    | 0.07299 | -0.4659 | 0.743 | 0.82 | 1 | HC_vs_MS.NoTrt_F |
| FAM219A   | 0.07301 | 0.67496 | 0.075 | 0.13 | 1 | HC_vs_MS.NoTrt_F |
| PARVB     | 0.07313 | 0.42841 | 0.749 | 0.73 | 1 | HC_vs_MS.NoTrt_F |
| CSMD1     | 0.07314 | 0.91582 | 0.361 | 0.29 | 1 | HC_vs_MS.NoTrt_F |
| JMY       | 0.07319 | 0.78857 | 0.353 | 0.45 | 1 | HC_vs_MS.NoTrt_F |
| NDUFS2    | 0.07323 | -0.255  | 0.454 | 0.5  | 1 | HC_vs_MS.NoTrt_F |
| MANF      | 0.07333 | 0.56831 | 0.064 | 0.11 | 1 | HC_vs_MS.NoTrt_F |
| ANAPC7    | 0.07333 | 0.39962 | 0.59  | 0.67 | 1 | HC_vs_MS.NoTrt_F |
| MINPP1    | 0.07354 | 0.37599 | 0.104 | 0.16 | 1 | HC_vs_MS.NoTrt_F |
| CLCN6     | 0.07382 | 1.26025 | 0.59  | 0.53 | 1 | HC_vs_MS.NoTrt_F |
| PARN      | 0.07413 | -0.7027 | 0.746 | 0.79 | 1 | HC_vs_MS.NoTrt_F |
| SLC25A16  | 0.07448 | 0.26506 | 0.974 | 0.98 | 1 | HC_vs_MS.NoTrt_F |
| HSD11B1L  | 0.07451 | 0.36218 | 0.731 | 0.7  | 1 | HC_vs_MS.NoTrt_F |
| AP3S1     | 0.07456 | -0.3032 | 0.413 | 0.45 | 1 | HC_vs_MS.NoTrt_F |
| BTLA      | 0.07464 | 0.74129 | 0.22  | 0.28 | 1 | HC_vs_MS.NoTrt_F |
| CFH       | 0.07466 | 0.37646 | 0.127 | 0.19 | 1 | HC_vs_MS.NoTrt_F |
| LINC01125 | 0.0747  | 0.41316 | 0.957 | 0.96 | 1 | HC_vs_MS.NoTrt_F |
| HIP1R     | 0.07483 | 1.11255 | 0.11  | 0.17 | 1 | HC_vs_MS.NoTrt_F |
| RGL4      | 0.07491 | 0.73108 | 0.263 | 0.36 | 1 | HC_vs_MS.NoTrt_F |
| SOAT1     | 0.07535 | -0.3765 | 0.743 | 0.79 | 1 | HC_vs_MS.NoTrt_F |
| IFITM2    | 0.07536 | 0.53938 | 0.824 | 0.81 | 1 | HC_vs_MS.NoTrt_F |
| SLC35E4   | 0.07546 | 1.03973 | 0.361 | 0.45 | 1 | HC_vs_MS.NoTrt_F |
| TMEM135   | 0.0755  | 0.4286  | 0.803 | 0.83 | 1 | HC_vs_MS.NoTrt_F |
| DUS1L     | 0.07558 | 1.16849 | 0.118 | 0.18 | 1 | HC_vs_MS.NoTrt_F |
| FAM156A   | 0.07589 | -0.6307 | 0.208 | 0.27 | 1 | HC_vs_MS.NoTrt_F |
| PGM1      | 0.07593 | 0.43701 | 0.127 | 0.19 | 1 | HC_vs_MS.NoTrt_F |
| SBNO2     | 0.07625 | 0.3962  | 0.228 | 0.3  | 1 | HC_vs_MS.NoTrt_F |
| TOPBP1    | 0.07629 | 1.19191 | 0.133 | 0.19 | 1 | HC_vs_MS.NoTrt_F |
| CCDC47    | 0.07643 | -0.3612 | 0.691 | 0.79 | 1 | HC_vs_MS.NoTrt_F |
| DXO       | 0.07661 | 0.372   | 0.171 | 0.24 | 1 | HC_vs_MS.NoTrt_F |
| HIST1H2AC | 0.07666 | 1.01405 | 0.081 | 0.13 | 1 | HC_vs_MS.NoTrt_F |
| ZBTB1     | 0.07666 | -0.4833 | 0.231 | 0.3  | 1 | HC_vs_MS.NoTrt_F |
| CCDC146   | 0.0767  | -0.3375 | 0.104 | 0.16 | 1 | HC_vs_MS.NoTrt_F |
| ACTR5     | 0.07693 | 0.25114 | 0.168 | 0.23 | 1 | HC_vs_MS.NoTrt_F |
| SLC36A1   | 0.07693 | 0.27421 | 0.098 | 0.16 | 1 | HC_vs_MS.NoTrt_F |

|            |         |         |       |      |   |                  |
|------------|---------|---------|-------|------|---|------------------|
| PLA2G6     | 0.07697 | 0.51984 | 0.428 | 0.52 | 1 | HC_vs_MS.NoTrt_F |
| FCRL5      | 0.07716 | 0.38062 | 0.569 | 0.52 | 1 | HC_vs_MS.NoTrt_F |
| PCDHGA8    | 0.07725 | 0.34405 | 0.662 | 0.56 | 1 | HC_vs_MS.NoTrt_F |
| AKT1S1     | 0.07733 | -1.0134 | 0.22  | 0.28 | 1 | HC_vs_MS.NoTrt_F |
| ZUFSP      | 0.07749 | 0.4012  | 0.098 | 0.16 | 1 | HC_vs_MS.NoTrt_F |
| YLPM1      | 0.07772 | 0.65574 | 0.749 | 0.67 | 1 | HC_vs_MS.NoTrt_F |
| ENPP3      | 0.07773 | 1.19951 | 0.139 | 0.2  | 1 | HC_vs_MS.NoTrt_F |
| IL5RA      | 0.07793 | 1.58305 | 0.318 | 0.4  | 1 | HC_vs_MS.NoTrt_F |
| RPL17-C18o | 0.07821 | 0.42244 | 0.09  | 0.14 | 1 | HC_vs_MS.NoTrt_F |
| PPP2R2D    | 0.07825 | -0.4284 | 0.65  | 0.73 | 1 | HC_vs_MS.NoTrt_F |
| RNF169     | 0.07837 | 0.89712 | 0.092 | 0.14 | 1 | HC_vs_MS.NoTrt_F |
| SFMBT1     | 0.07841 | -0.6554 | 0.587 | 0.68 | 1 | HC_vs_MS.NoTrt_F |
| TMEM14C    | 0.07842 | 0.25281 | 0.142 | 0.2  | 1 | HC_vs_MS.NoTrt_F |
| TNS3       | 0.07846 | 0.78672 | 0.419 | 0.35 | 1 | HC_vs_MS.NoTrt_F |
| CHIC1      | 0.07848 | 0.55747 | 0.107 | 0.17 | 1 | HC_vs_MS.NoTrt_F |
| ARL5A      | 0.0788  | 0.45787 | 0.205 | 0.28 | 1 | HC_vs_MS.NoTrt_F |
| USO1       | 0.07886 | 0.28492 | 0.208 | 0.28 | 1 | HC_vs_MS.NoTrt_F |
| TMCO4      | 0.079   | 0.25178 | 0.136 | 0.19 | 1 | HC_vs_MS.NoTrt_F |
| HOMEZ      | 0.07924 | -0.7393 | 0.26  | 0.32 | 1 | HC_vs_MS.NoTrt_F |
| POLR2H     | 0.0794  | 0.40908 | 0.448 | 0.54 | 1 | HC_vs_MS.NoTrt_F |
| ELAC1      | 0.07952 | -0.5642 | 0.512 | 0.58 | 1 | HC_vs_MS.NoTrt_F |
| PHF2       | 0.07957 | 0.9088  | 0.104 | 0.16 | 1 | HC_vs_MS.NoTrt_F |
| RMI1       | 0.07957 | 0.77225 | 0.286 | 0.38 | 1 | HC_vs_MS.NoTrt_F |
| GLTSCR2    | 0.07967 | 0.28155 | 0.876 | 0.92 | 1 | HC_vs_MS.NoTrt_F |
| ZNF670-ZNF | 0.07971 | 0.45067 | 0.671 | 0.67 | 1 | HC_vs_MS.NoTrt_F |
| RAD51      | 0.07981 | -0.5346 | 0.512 | 0.61 | 1 | HC_vs_MS.NoTrt_F |
| ICAM4      | 0.0799  | 0.29062 | 0.668 | 0.61 | 1 | HC_vs_MS.NoTrt_F |
| DHCR7      | 0.08004 | 0.40712 | 0.081 | 0.13 | 1 | HC_vs_MS.NoTrt_F |
| GAA        | 0.08012 | 0.97096 | 0.101 | 0.16 | 1 | HC_vs_MS.NoTrt_F |
| SRRD       | 0.08013 | 0.34208 | 0.474 | 0.54 | 1 | HC_vs_MS.NoTrt_F |
| POLG2      | 0.08025 | -0.4875 | 0.538 | 0.56 | 1 | HC_vs_MS.NoTrt_F |
| DDX20      | 0.08029 | 0.64218 | 0.116 | 0.17 | 1 | HC_vs_MS.NoTrt_F |
| UBE3A      | 0.08041 | -0.6308 | 0.598 | 0.64 | 1 | HC_vs_MS.NoTrt_F |
| TUNAR      | 0.08053 | 1.47386 | 0.168 | 0.24 | 1 | HC_vs_MS.NoTrt_F |
| TREML2     | 0.08066 | 0.45067 | 0.133 | 0.2  | 1 | HC_vs_MS.NoTrt_F |
| TYMP       | 0.08077 | 0.4026  | 0.367 | 0.45 | 1 | HC_vs_MS.NoTrt_F |
| BRWD3      | 0.08079 | -0.292  | 0.153 | 0.22 | 1 | HC_vs_MS.NoTrt_F |
| HMGCR      | 0.08083 | 0.38222 | 0.711 | 0.81 | 1 | HC_vs_MS.NoTrt_F |
| BLOC1S4    | 0.08089 | 0.76551 | 0.171 | 0.23 | 1 | HC_vs_MS.NoTrt_F |
| ERI1       | 0.08094 | 0.33271 | 0.451 | 0.54 | 1 | HC_vs_MS.NoTrt_F |



|          |         |         |       |      |   |                  |
|----------|---------|---------|-------|------|---|------------------|
| WDR83OS  | 0.08102 | 0.30225 | 0.231 | 0.31 | 1 | HC_vs_MS.NoTrt_F |
| MSH3     | 0.08128 | -0.6663 | 0.474 | 0.51 | 1 | HC_vs_MS.NoTrt_F |
| PACSLN2  | 0.0813  | -0.4956 | 0.494 | 0.58 | 1 | HC_vs_MS.NoTrt_F |
| CHMP6    | 0.0815  | 0.67523 | 0.145 | 0.21 | 1 | HC_vs_MS.NoTrt_F |
| KCTD11   | 0.08182 | 1.47795 | 0.173 | 0.24 | 1 | HC_vs_MS.NoTrt_F |
| INTS7    | 0.082   | -0.2993 | 0.457 | 0.53 | 1 | HC_vs_MS.NoTrt_F |
| PKP4     | 0.08211 | 0.3314  | 0.116 | 0.17 | 1 | HC_vs_MS.NoTrt_F |
| ZNF282   | 0.08235 | 0.91211 | 0.081 | 0.13 | 1 | HC_vs_MS.NoTrt_F |
| CORO2A   | 0.08241 | 0.49775 | 0.861 | 0.78 | 1 | HC_vs_MS.NoTrt_F |
| TLL1     | 0.08244 | 1.07335 | 0.064 | 0.11 | 1 | HC_vs_MS.NoTrt_F |
| LPGAT1   | 0.0825  | 0.71727 | 0.61  | 0.51 | 1 | HC_vs_MS.NoTrt_F |
| C3orf70  | 0.08257 | 0.56628 | 0.801 | 0.74 | 1 | HC_vs_MS.NoTrt_F |
| PODXL    | 0.08277 | 0.38442 | 0.211 | 0.28 | 1 | HC_vs_MS.NoTrt_F |
| SKI      | 0.08289 | 0.51865 | 0.133 | 0.19 | 1 | HC_vs_MS.NoTrt_F |
| C1orf162 | 0.08305 | 0.45928 | 0.142 | 0.2  | 1 | HC_vs_MS.NoTrt_F |
| ING3     | 0.08308 | 0.39217 | 0.176 | 0.24 | 1 | HC_vs_MS.NoTrt_F |
| FAM117A  | 0.08308 | 0.3362  | 0.717 | 0.79 | 1 | HC_vs_MS.NoTrt_F |
| PANK4    | 0.08323 | 0.30322 | 0.107 | 0.16 | 1 | HC_vs_MS.NoTrt_F |
| PTPRB    | 0.08338 | 0.4742  | 0.624 | 0.55 | 1 | HC_vs_MS.NoTrt_F |
| SNAPC5   | 0.08351 | -0.4947 | 0.616 | 0.66 | 1 | HC_vs_MS.NoTrt_F |
| FADS3    | 0.08377 | -0.3385 | 0.662 | 0.71 | 1 | HC_vs_MS.NoTrt_F |
| STX16    | 0.08395 | -0.3501 | 0.506 | 0.57 | 1 | HC_vs_MS.NoTrt_F |
| MIS12    | 0.08434 | -0.505  | 0.341 | 0.42 | 1 | HC_vs_MS.NoTrt_F |
| IP6K2    | 0.08447 | -0.2847 | 0.373 | 0.44 | 1 | HC_vs_MS.NoTrt_F |
| URB1     | 0.0848  | 1.07415 | 0.52  | 0.58 | 1 | HC_vs_MS.NoTrt_F |
| ZNF280B  | 0.08525 | 0.9712  | 0.139 | 0.2  | 1 | HC_vs_MS.NoTrt_F |
| RBMS1    | 0.08535 | 1.30502 | 0.731 | 0.71 | 1 | HC_vs_MS.NoTrt_F |
| COL4A3BP | 0.08541 | 0.36891 | 0.168 | 0.24 | 1 | HC_vs_MS.NoTrt_F |
| GZMA     | 0.08561 | 0.56417 | 0.133 | 0.19 | 1 | HC_vs_MS.NoTrt_F |
| RECK     | 0.08562 | 0.47057 | 0.188 | 0.25 | 1 | HC_vs_MS.NoTrt_F |
| ARHGEF6  | 0.08565 | 0.31875 | 0.379 | 0.49 | 1 | HC_vs_MS.NoTrt_F |
| ACAA1    | 0.08569 | -0.3269 | 0.52  | 0.58 | 1 | HC_vs_MS.NoTrt_F |
| APIP     | 0.08583 | 0.36618 | 0.509 | 0.61 | 1 | HC_vs_MS.NoTrt_F |
| CAPNS1   | 0.0859  | -0.3095 | 0.37  | 0.44 | 1 | HC_vs_MS.NoTrt_F |
| MTPN     | 0.08603 | 0.46724 | 0.257 | 0.33 | 1 | HC_vs_MS.NoTrt_F |
| GLUD1    | 0.08637 | 0.34799 | 0.275 | 0.35 | 1 | HC_vs_MS.NoTrt_F |
| RGCC     | 0.08658 | 0.37255 | 0.41  | 0.53 | 1 | HC_vs_MS.NoTrt_F |
| PLD1     | 0.08667 | 0.65923 | 0.549 | 0.65 | 1 | HC_vs_MS.NoTrt_F |
| PRDM10   | 0.08676 | 1.41966 | 0.09  | 0.14 | 1 | HC_vs_MS.NoTrt_F |
| PRPF4B   | 0.08677 | -0.2661 | 0.364 | 0.45 | 1 | HC_vs_MS.NoTrt_F |

|             |         |         |       |      |   |                  |
|-------------|---------|---------|-------|------|---|------------------|
| AP1S2       | 0.08686 | 0.30767 | 0.228 | 0.3  | 1 | HC_vs_MS.NoTrt_F |
| MITD1       | 0.08723 | 0.34861 | 0.962 | 0.97 | 1 | HC_vs_MS.NoTrt_F |
| MAP4K2      | 0.08727 | -0.2873 | 0.708 | 0.76 | 1 | HC_vs_MS.NoTrt_F |
| TRIM16L     | 0.08739 | 0.39273 | 0.783 | 0.8  | 1 | HC_vs_MS.NoTrt_F |
| EMC6        | 0.08748 | 0.63515 | 0.116 | 0.17 | 1 | HC_vs_MS.NoTrt_F |
| NBAS        | 0.08754 | 0.58195 | 0.251 | 0.33 | 1 | HC_vs_MS.NoTrt_F |
| KLHDC1      | 0.08777 | 0.38158 | 0.332 | 0.4  | 1 | HC_vs_MS.NoTrt_F |
| SCYL3       | 0.08789 | 0.48909 | 0.818 | 0.72 | 1 | HC_vs_MS.NoTrt_F |
| ALG1        | 0.088   | -0.3186 | 0.601 | 0.66 | 1 | HC_vs_MS.NoTrt_F |
| LAMTOR2     | 0.08803 | 0.27916 | 0.191 | 0.26 | 1 | HC_vs_MS.NoTrt_F |
| KPTN        | 0.08863 | -0.832  | 0.22  | 0.28 | 1 | HC_vs_MS.NoTrt_F |
| EIF4G3      | 0.08873 | 0.32293 | 0.301 | 0.37 | 1 | HC_vs_MS.NoTrt_F |
| SESN1       | 0.08874 | 0.49044 | 0.214 | 0.29 | 1 | HC_vs_MS.NoTrt_F |
| CCDC183     | 0.0888  | 0.62416 | 0.078 | 0.13 | 1 | HC_vs_MS.NoTrt_F |
| NOMO1       | 0.0889  | 0.46623 | 0.199 | 0.27 | 1 | HC_vs_MS.NoTrt_F |
| GNPNAT1     | 0.08905 | 1.03094 | 0.581 | 0.52 | 1 | HC_vs_MS.NoTrt_F |
| DFNA5       | 0.08911 | -0.5866 | 0.15  | 0.22 | 1 | HC_vs_MS.NoTrt_F |
| SLC26A6     | 0.08916 | 0.80656 | 0.113 | 0.17 | 1 | HC_vs_MS.NoTrt_F |
| KIAA1328    | 0.08928 | 0.2814  | 0.986 | 0.99 | 1 | HC_vs_MS.NoTrt_F |
| PCDH9       | 0.09016 | 0.32306 | 0.691 | 0.75 | 1 | HC_vs_MS.NoTrt_F |
| KYAT3       | 0.09023 | -0.3031 | 0.136 | 0.19 | 1 | HC_vs_MS.NoTrt_F |
| ZNF468      | 0.09027 | -0.5151 | 0.529 | 0.62 | 1 | HC_vs_MS.NoTrt_F |
| CTD-2192J10 | 0.09028 | 0.39541 | 0.512 | 0.61 | 1 | HC_vs_MS.NoTrt_F |
| MAZ         | 0.0903  | 0.42085 | 0.182 | 0.25 | 1 | HC_vs_MS.NoTrt_F |
| PTP4A3      | 0.09047 | 0.82373 | 0.11  | 0.17 | 1 | HC_vs_MS.NoTrt_F |
| FCGR2B      | 0.09077 | 0.75049 | 0.075 | 0.12 | 1 | HC_vs_MS.NoTrt_F |
| ZNF425      | 0.09083 | -1.3679 | 0.445 | 0.51 | 1 | HC_vs_MS.NoTrt_F |
| C5AR1       | 0.09094 | 0.36908 | 0.98  | 0.97 | 1 | HC_vs_MS.NoTrt_F |
| NIPA1       | 0.09125 | 0.86557 | 0.191 | 0.25 | 1 | HC_vs_MS.NoTrt_F |
| AP3B1       | 0.09137 | -0.4294 | 0.486 | 0.54 | 1 | HC_vs_MS.NoTrt_F |
| PPP2CB      | 0.09147 | 0.48704 | 0.564 | 0.6  | 1 | HC_vs_MS.NoTrt_F |
| SRGAP1      | 0.0916  | 0.55536 | 0.954 | 0.94 | 1 | HC_vs_MS.NoTrt_F |
| TNC         | 0.09164 | 0.27861 | 0.344 | 0.44 | 1 | HC_vs_MS.NoTrt_F |
| MGME1       | 0.09178 | 0.58197 | 0.118 | 0.17 | 1 | HC_vs_MS.NoTrt_F |
| CCZ1        | 0.09188 | -0.4012 | 0.72  | 0.77 | 1 | HC_vs_MS.NoTrt_F |
| MFGE8       | 0.09212 | -1.247  | 0.604 | 0.62 | 1 | HC_vs_MS.NoTrt_F |
| PPP3CB      | 0.09213 | 0.68303 | 0.136 | 0.19 | 1 | HC_vs_MS.NoTrt_F |
| LIMS3       | 0.09216 | 0.29399 | 0.647 | 0.56 | 1 | HC_vs_MS.NoTrt_F |
| MAGED2      | 0.09217 | -0.2845 | 0.24  | 0.29 | 1 | HC_vs_MS.NoTrt_F |
| SNX21       | 0.09218 | 0.82915 | 0.468 | 0.56 | 1 | HC_vs_MS.NoTrt_F |

|             |         |         |       |      |   |                  |
|-------------|---------|---------|-------|------|---|------------------|
| L3MBTL4     | 0.09237 | -0.7244 | 0.494 | 0.59 | 1 | HC_vs_MS.NoTrt_F |
| WDR46       | 0.09266 | 0.90786 | 0.133 | 0.19 | 1 | HC_vs_MS.NoTrt_F |
| CASP9       | 0.09272 | 0.8365  | 0.471 | 0.4  | 1 | HC_vs_MS.NoTrt_F |
| NFE2L1      | 0.09273 | 0.35127 | 0.101 | 0.16 | 1 | HC_vs_MS.NoTrt_F |
| IFIT5       | 0.09277 | 0.32816 | 0.104 | 0.16 | 1 | HC_vs_MS.NoTrt_F |
| PRKCZ       | 0.0928  | 0.53665 | 0.301 | 0.38 | 1 | HC_vs_MS.NoTrt_F |
| POLR3H      | 0.09289 | 0.69014 | 0.272 | 0.35 | 1 | HC_vs_MS.NoTrt_F |
| MON1A       | 0.0929  | 0.27101 | 0.116 | 0.17 | 1 | HC_vs_MS.NoTrt_F |
| MAD2L1BP    | 0.09295 | -0.8362 | 0.191 | 0.25 | 1 | HC_vs_MS.NoTrt_F |
| ZNF701      | 0.093   | 0.47264 | 0.477 | 0.57 | 1 | HC_vs_MS.NoTrt_F |
| E2F5        | 0.09309 | -0.3264 | 0.393 | 0.46 | 1 | HC_vs_MS.NoTrt_F |
| MRPL50      | 0.09336 | -0.3407 | 0.165 | 0.22 | 1 | HC_vs_MS.NoTrt_F |
| CDH8        | 0.09345 | 0.2922  | 0.514 | 0.59 | 1 | HC_vs_MS.NoTrt_F |
| MAP4K3      | 0.0935  | 0.43919 | 0.084 | 0.13 | 1 | HC_vs_MS.NoTrt_F |
| GZMM        | 0.09357 | 0.53537 | 0.199 | 0.28 | 1 | HC_vs_MS.NoTrt_F |
| ZFAND3      | 0.09382 | 0.4939  | 0.734 | 0.79 | 1 | HC_vs_MS.NoTrt_F |
| LOXL1       | 0.09404 | 0.86594 | 0.104 | 0.16 | 1 | HC_vs_MS.NoTrt_F |
| NAGA        | 0.0941  | 0.6279  | 0.13  | 0.19 | 1 | HC_vs_MS.NoTrt_F |
| PAPLN       | 0.09418 | 0.43471 | 0.847 | 0.82 | 1 | HC_vs_MS.NoTrt_F |
| DAP3        | 0.0942  | -0.569  | 0.913 | 0.93 | 1 | HC_vs_MS.NoTrt_F |
| SRPK2       | 0.09425 | 0.4299  | 0.341 | 0.44 | 1 | HC_vs_MS.NoTrt_F |
| CFHR1       | 0.09428 | 0.42723 | 0.786 | 0.77 | 1 | HC_vs_MS.NoTrt_F |
| RAD51B      | 0.0943  | -0.405  | 0.327 | 0.4  | 1 | HC_vs_MS.NoTrt_F |
| MTM1        | 0.09435 | -0.2541 | 0.228 | 0.29 | 1 | HC_vs_MS.NoTrt_F |
| MRPS15      | 0.09442 | -0.3066 | 0.584 | 0.62 | 1 | HC_vs_MS.NoTrt_F |
| COG6        | 0.09443 | -0.2547 | 0.159 | 0.22 | 1 | HC_vs_MS.NoTrt_F |
| INTS12      | 0.09449 | 0.28658 | 0.136 | 0.19 | 1 | HC_vs_MS.NoTrt_F |
| UHRF1BP1L   | 0.09452 | -0.8899 | 0.393 | 0.47 | 1 | HC_vs_MS.NoTrt_F |
| CD58        | 0.09456 | 0.48336 | 0.303 | 0.39 | 1 | HC_vs_MS.NoTrt_F |
| CCDC137     | 0.09464 | 0.36724 | 0.298 | 0.37 | 1 | HC_vs_MS.NoTrt_F |
| BST1        | 0.0947  | 0.25639 | 0.555 | 0.63 | 1 | HC_vs_MS.NoTrt_F |
| TMUB2       | 0.09473 | 0.32362 | 0.882 | 0.86 | 1 | HC_vs_MS.NoTrt_F |
| GS1-114I9.3 | 0.09488 | 1.14849 | 0.078 | 0.13 | 1 | HC_vs_MS.NoTrt_F |
| ARFGAP1     | 0.09497 | -0.646  | 0.234 | 0.28 | 1 | HC_vs_MS.NoTrt_F |
| CHMP1B      | 0.09499 | 0.49955 | 0.855 | 0.83 | 1 | HC_vs_MS.NoTrt_F |
| SLAMF6      | 0.09501 | -0.8046 | 0.549 | 0.56 | 1 | HC_vs_MS.NoTrt_F |
| PIM3        | 0.09507 | 0.42834 | 0.176 | 0.24 | 1 | HC_vs_MS.NoTrt_F |
| GOLM1       | 0.09517 | 0.94322 | 0.642 | 0.62 | 1 | HC_vs_MS.NoTrt_F |
| NSUN5       | 0.09521 | 0.26416 | 0.35  | 0.41 | 1 | HC_vs_MS.NoTrt_F |
| SLC11A2     | 0.09522 | 0.26541 | 0.801 | 0.74 | 1 | HC_vs_MS.NoTrt_F |

|           |         |         |       |      |   |                  |
|-----------|---------|---------|-------|------|---|------------------|
| BMP1      | 0.09523 | 0.80593 | 0.639 | 0.6  | 1 | HC_vs_MS.NoTrt_F |
| PRKRIP1   | 0.09534 | -0.3457 | 0.211 | 0.26 | 1 | HC_vs_MS.NoTrt_F |
| AAMP      | 0.09555 | -0.4899 | 0.234 | 0.28 | 1 | HC_vs_MS.NoTrt_F |
| ZNF800    | 0.09569 | 0.72477 | 0.251 | 0.33 | 1 | HC_vs_MS.NoTrt_F |
| POU2F1    | 0.09585 | 0.34906 | 0.422 | 0.48 | 1 | HC_vs_MS.NoTrt_F |
| COG5      | 0.09588 | 1.45336 | 0.263 | 0.34 | 1 | HC_vs_MS.NoTrt_F |
| PNLIPRP1  | 0.09593 | 0.30818 | 0.853 | 0.86 | 1 | HC_vs_MS.NoTrt_F |
| TMEM161B  | 0.09596 | -0.3722 | 0.642 | 0.71 | 1 | HC_vs_MS.NoTrt_F |
| ZNF484    | 0.09616 | 0.92722 | 0.107 | 0.16 | 1 | HC_vs_MS.NoTrt_F |
| ANKRD26   | 0.09616 | 0.97296 | 0.159 | 0.22 | 1 | HC_vs_MS.NoTrt_F |
| ESRP2     | 0.09658 | 0.50378 | 0.081 | 0.13 | 1 | HC_vs_MS.NoTrt_F |
| CCNG2     | 0.09661 | 0.51096 | 0.35  | 0.41 | 1 | HC_vs_MS.NoTrt_F |
| TMEM185B  | 0.09675 | -0.9183 | 0.335 | 0.39 | 1 | HC_vs_MS.NoTrt_F |
| TUBGCP5   | 0.09679 | 0.41286 | 0.697 | 0.79 | 1 | HC_vs_MS.NoTrt_F |
| HARS2     | 0.09684 | 0.93973 | 0.153 | 0.22 | 1 | HC_vs_MS.NoTrt_F |
| ARHGAP11A | 0.0971  | -0.947  | 0.422 | 0.5  | 1 | HC_vs_MS.NoTrt_F |
| ABCA9     | 0.0973  | 0.72222 | 0.882 | 0.88 | 1 | HC_vs_MS.NoTrt_F |
| AKAP6     | 0.09738 | 0.27194 | 0.777 | 0.76 | 1 | HC_vs_MS.NoTrt_F |
| ARHGAP10  | 0.09744 | 0.49603 | 0.182 | 0.25 | 1 | HC_vs_MS.NoTrt_F |
| CSF1R     | 0.0975  | -0.8237 | 0.197 | 0.27 | 1 | HC_vs_MS.NoTrt_F |
| RYK       | 0.09752 | 0.38026 | 0.118 | 0.17 | 1 | HC_vs_MS.NoTrt_F |
| POLQ      | 0.09754 | 0.53313 | 0.618 | 0.55 | 1 | HC_vs_MS.NoTrt_F |
| SYNJ2BP   | 0.09779 | -0.2778 | 0.867 | 0.91 | 1 | HC_vs_MS.NoTrt_F |
| PRDM15    | 0.09798 | -0.4884 | 0.636 | 0.58 | 1 | HC_vs_MS.NoTrt_F |
| ATP5G1    | 0.09806 | -0.2765 | 0.306 | 0.38 | 1 | HC_vs_MS.NoTrt_F |
| RAB12     | 0.09836 | 1.75106 | 0.361 | 0.35 | 1 | HC_vs_MS.NoTrt_F |
| TCF7      | 0.09836 | 1.04052 | 0.78  | 0.76 | 1 | HC_vs_MS.NoTrt_F |
| OSCAR     | 0.09856 | 0.27191 | 0.066 | 0.11 | 1 | HC_vs_MS.NoTrt_F |
| FAM58A    | 0.09858 | 0.62345 | 0.107 | 0.16 | 1 | HC_vs_MS.NoTrt_F |
| SLC25A39  | 0.09875 | 0.25467 | 0.72  | 0.77 | 1 | HC_vs_MS.NoTrt_F |
| ZNF429    | 0.09882 | 0.76096 | 0.928 | 0.91 | 1 | HC_vs_MS.NoTrt_F |
| RMND5A    | 0.09926 | 0.94436 | 0.384 | 0.32 | 1 | HC_vs_MS.NoTrt_F |
| USP34     | 0.09927 | 0.28979 | 0.671 | 0.72 | 1 | HC_vs_MS.NoTrt_F |
| EDARADD   | 0.0995  | -0.323  | 0.107 | 0.16 | 1 | HC_vs_MS.NoTrt_F |
| APP       | 0.09971 | 0.88519 | 0.731 | 0.72 | 1 | HC_vs_MS.NoTrt_F |
| NEPRO     | 0.09983 | -0.4008 | 0.197 | 0.25 | 1 | HC_vs_MS.NoTrt_F |
| CEP83     | 0.09983 | 0.38384 | 0.754 | 0.69 | 1 | HC_vs_MS.NoTrt_F |
| USP6NL    | 0.09998 | 0.26591 | 0.827 | 0.8  | 1 | HC_vs_MS.NoTrt_F |
| ADPRHL1   | 0.1002  | -0.5225 | 0.315 | 0.38 | 1 | HC_vs_MS.NoTrt_F |
| C14orf93  | 0.10036 | -0.5197 | 0.335 | 0.39 | 1 | HC_vs_MS.NoTrt_F |

|            |         |         |       |      |   |                  |
|------------|---------|---------|-------|------|---|------------------|
| ORC5       | 0.10103 | 0.33274 | 0.263 | 0.34 | 1 | HC_vs_MS.NoTrt_F |
| NUDT18     | 0.10103 | 0.41193 | 0.066 | 0.11 | 1 | HC_vs_MS.NoTrt_F |
| TNKS2      | 0.10111 | 0.54544 | 0.347 | 0.45 | 1 | HC_vs_MS.NoTrt_F |
| CHMP3      | 0.1014  | -0.3272 | 0.367 | 0.42 | 1 | HC_vs_MS.NoTrt_F |
| MLKL       | 0.102   | -0.3705 | 0.829 | 0.72 | 1 | HC_vs_MS.NoTrt_F |
| TACR2      | 0.10205 | 0.53417 | 0.121 | 0.18 | 1 | HC_vs_MS.NoTrt_F |
| SLC7A6     | 0.10216 | 0.45323 | 0.555 | 0.66 | 1 | HC_vs_MS.NoTrt_F |
| PSTPIP2    | 0.10237 | -0.3407 | 0.408 | 0.48 | 1 | HC_vs_MS.NoTrt_F |
| ANAPC10    | 0.1025  | 0.33982 | 0.168 | 0.23 | 1 | HC_vs_MS.NoTrt_F |
| RBL1       | 0.10262 | -0.2973 | 0.642 | 0.66 | 1 | HC_vs_MS.NoTrt_F |
| TBX19      | 0.10282 | 0.30904 | 0.11  | 0.16 | 1 | HC_vs_MS.NoTrt_F |
| TMEM234    | 0.10286 | 0.62204 | 0.127 | 0.18 | 1 | HC_vs_MS.NoTrt_F |
| NDUFS5     | 0.10333 | 0.26958 | 0.277 | 0.37 | 1 | HC_vs_MS.NoTrt_F |
| LAPTM4A    | 0.1034  | -0.3026 | 0.228 | 0.28 | 1 | HC_vs_MS.NoTrt_F |
| MAPT       | 0.10358 | 0.65183 | 0.746 | 0.72 | 1 | HC_vs_MS.NoTrt_F |
| VTI1A      | 0.10361 | -0.4154 | 0.902 | 0.92 | 1 | HC_vs_MS.NoTrt_F |
| MTOR       | 0.1037  | -0.6029 | 0.243 | 0.29 | 1 | HC_vs_MS.NoTrt_F |
| TMEM38A    | 0.10372 | 0.37167 | 0.581 | 0.49 | 1 | HC_vs_MS.NoTrt_F |
| FXR2       | 0.10375 | 0.61496 | 0.714 | 0.69 | 1 | HC_vs_MS.NoTrt_F |
| DTX3L      | 0.10377 | 0.34099 | 0.711 | 0.79 | 1 | HC_vs_MS.NoTrt_F |
| TSG101     | 0.1038  | -0.3713 | 0.506 | 0.54 | 1 | HC_vs_MS.NoTrt_F |
| DIMT1      | 0.10452 | 0.75441 | 0.162 | 0.23 | 1 | HC_vs_MS.NoTrt_F |
| LRCH3      | 0.10459 | 0.27527 | 0.988 | 0.98 | 1 | HC_vs_MS.NoTrt_F |
| MIB2       | 0.1046  | 0.4545  | 0.202 | 0.26 | 1 | HC_vs_MS.NoTrt_F |
| PMF1-BGLA  | 0.10463 | 1.01511 | 0.11  | 0.17 | 1 | HC_vs_MS.NoTrt_F |
| TUT1       | 0.10479 | -1.2889 | 0.191 | 0.24 | 1 | HC_vs_MS.NoTrt_F |
| FAM227A    | 0.10509 | 0.28929 | 0.942 | 0.94 | 1 | HC_vs_MS.NoTrt_F |
| XKR8       | 0.10514 | -0.98   | 0.185 | 0.24 | 1 | HC_vs_MS.NoTrt_F |
| KIDINS220  | 0.1052  | -0.5699 | 0.298 | 0.35 | 1 | HC_vs_MS.NoTrt_F |
| CENPP      | 0.1052  | -0.2823 | 0.064 | 0.11 | 1 | HC_vs_MS.NoTrt_F |
| PCED1A     | 0.10525 | 0.40746 | 0.185 | 0.25 | 1 | HC_vs_MS.NoTrt_F |
| ZNF169     | 0.10534 | 0.44995 | 0.908 | 0.87 | 1 | HC_vs_MS.NoTrt_F |
| MIXL1      | 0.10544 | 0.28637 | 0.725 | 0.6  | 1 | HC_vs_MS.NoTrt_F |
| DNAJC5     | 0.10579 | 1.04448 | 0.11  | 0.16 | 1 | HC_vs_MS.NoTrt_F |
| EML3       | 0.10585 | 0.46222 | 0.269 | 0.34 | 1 | HC_vs_MS.NoTrt_F |
| L3MBTL1    | 0.10589 | 0.58575 | 0.685 | 0.65 | 1 | HC_vs_MS.NoTrt_F |
| TBRG4      | 0.106   | -0.4509 | 0.436 | 0.48 | 1 | HC_vs_MS.NoTrt_F |
| STXBP3     | 0.10602 | -0.5071 | 0.636 | 0.65 | 1 | HC_vs_MS.NoTrt_F |
| RP11-619A1 | 0.10642 | -0.4902 | 0.63  | 0.7  | 1 | HC_vs_MS.NoTrt_F |
| ALKBH2     | 0.10649 | -0.4367 | 0.37  | 0.44 | 1 | HC_vs_MS.NoTrt_F |

|             |         |         |       |      |   |                  |
|-------------|---------|---------|-------|------|---|------------------|
| MAP3K7CL    | 0.10658 | -0.3195 | 0.465 | 0.53 | 1 | HC_vs_MS.NoTrt_F |
| TPCN1       | 0.10673 | -0.3596 | 0.428 | 0.51 | 1 | HC_vs_MS.NoTrt_F |
| CRELD2      | 0.10688 | -0.4291 | 0.645 | 0.67 | 1 | HC_vs_MS.NoTrt_F |
| NFXL1       | 0.10692 | 0.48928 | 0.145 | 0.2  | 1 | HC_vs_MS.NoTrt_F |
| MARVELD2    | 0.10717 | 0.48842 | 0.725 | 0.72 | 1 | HC_vs_MS.NoTrt_F |
| CSTF1       | 0.10723 | -0.82   | 0.72  | 0.76 | 1 | HC_vs_MS.NoTrt_F |
| CXCL16      | 0.10731 | 0.50329 | 0.662 | 0.61 | 1 | HC_vs_MS.NoTrt_F |
| CYP2C19     | 0.10739 | 0.54536 | 0.769 | 0.76 | 1 | HC_vs_MS.NoTrt_F |
| BPHL        | 0.10742 | 0.48194 | 0.694 | 0.75 | 1 | HC_vs_MS.NoTrt_F |
| ZACN        | 0.10745 | 0.49531 | 0.084 | 0.13 | 1 | HC_vs_MS.NoTrt_F |
| DMXL1       | 0.1077  | 0.68519 | 0.24  | 0.31 | 1 | HC_vs_MS.NoTrt_F |
| BICD2       | 0.10771 | 0.57706 | 0.116 | 0.17 | 1 | HC_vs_MS.NoTrt_F |
| CNBD2       | 0.10774 | 0.84345 | 0.543 | 0.49 | 1 | HC_vs_MS.NoTrt_F |
| KRBA2       | 0.10777 | -1.2259 | 0.387 | 0.44 | 1 | HC_vs_MS.NoTrt_F |
| ERGIC1      | 0.1078  | 0.29072 | 0.882 | 0.86 | 1 | HC_vs_MS.NoTrt_F |
| TMEM164     | 0.1079  | 0.79788 | 0.107 | 0.16 | 1 | HC_vs_MS.NoTrt_F |
| C18orf25    | 0.10797 | -0.349  | 0.468 | 0.5  | 1 | HC_vs_MS.NoTrt_F |
| EXOC3L4     | 0.10803 | -0.5343 | 0.254 | 0.31 | 1 | HC_vs_MS.NoTrt_F |
| CSF2RB      | 0.10809 | 0.47763 | 0.124 | 0.18 | 1 | HC_vs_MS.NoTrt_F |
| TMED2       | 0.10817 | -0.3332 | 0.78  | 0.77 | 1 | HC_vs_MS.NoTrt_F |
| C12orf60    | 0.10831 | 0.52321 | 0.676 | 0.62 | 1 | HC_vs_MS.NoTrt_F |
| GOLGA6L1    | 0.10833 | 0.43551 | 0.471 | 0.43 | 1 | HC_vs_MS.NoTrt_F |
| PTPN7       | 0.10863 | 0.75035 | 0.775 | 0.75 | 1 | HC_vs_MS.NoTrt_F |
| SMG6        | 0.10869 | 0.3556  | 0.251 | 0.33 | 1 | HC_vs_MS.NoTrt_F |
| PTTG1IP     | 0.10877 | 0.32178 | 0.254 | 0.34 | 1 | HC_vs_MS.NoTrt_F |
| MAP3K12     | 0.10881 | 0.39211 | 0.731 | 0.79 | 1 | HC_vs_MS.NoTrt_F |
| STX4        | 0.10887 | 0.28122 | 0.223 | 0.28 | 1 | HC_vs_MS.NoTrt_F |
| TSNARE1     | 0.10902 | 0.54603 | 0.133 | 0.19 | 1 | HC_vs_MS.NoTrt_F |
| NFYA        | 0.10908 | 0.72455 | 0.159 | 0.22 | 1 | HC_vs_MS.NoTrt_F |
| SERPINA10   | 0.1091  | 0.3855  | 0.627 | 0.58 | 1 | HC_vs_MS.NoTrt_F |
| ZBTB46      | 0.10911 | -0.5737 | 0.136 | 0.19 | 1 | HC_vs_MS.NoTrt_F |
| VPS8        | 0.10912 | -0.7169 | 0.691 | 0.75 | 1 | HC_vs_MS.NoTrt_F |
| AK5         | 0.10913 | 0.68038 | 0.156 | 0.22 | 1 | HC_vs_MS.NoTrt_F |
| RP11-864I4. | 0.10914 | -0.4836 | 0.084 | 0.13 | 1 | HC_vs_MS.NoTrt_F |
| NRP1        | 0.10919 | 0.43353 | 0.465 | 0.41 | 1 | HC_vs_MS.NoTrt_F |
| SSH1        | 0.10925 | 0.40721 | 0.887 | 0.89 | 1 | HC_vs_MS.NoTrt_F |
| ZFP36L2     | 0.10939 | 1.00349 | 0.595 | 0.64 | 1 | HC_vs_MS.NoTrt_F |
| CNOT6       | 0.10952 | 0.27927 | 0.182 | 0.23 | 1 | HC_vs_MS.NoTrt_F |
| SZT2        | 0.10958 | 0.31557 | 0.884 | 0.9  | 1 | HC_vs_MS.NoTrt_F |
| HERPUD2     | 0.10981 | 0.34328 | 0.561 | 0.63 | 1 | HC_vs_MS.NoTrt_F |

|          |         |         |       |      |   |                  |
|----------|---------|---------|-------|------|---|------------------|
| KHNYN    | 0.10995 | 0.87201 | 0.136 | 0.19 | 1 | HC_vs_MS.NoTrt_F |
| CPM      | 0.11    | 0.58262 | 0.832 | 0.77 | 1 | HC_vs_MS.NoTrt_F |
| ERP27    | 0.1102  | 0.28636 | 0.26  | 0.34 | 1 | HC_vs_MS.NoTrt_F |
| NOL6     | 0.11022 | 1.29405 | 0.431 | 0.5  | 1 | HC_vs_MS.NoTrt_F |
| MRPL16   | 0.11022 | 0.4555  | 0.211 | 0.28 | 1 | HC_vs_MS.NoTrt_F |
| CDK7     | 0.11052 | 0.36046 | 0.22  | 0.29 | 1 | HC_vs_MS.NoTrt_F |
| AIM2     | 0.11092 | 1.18655 | 0.341 | 0.27 | 1 | HC_vs_MS.NoTrt_F |
| SLC26A2  | 0.11111 | 0.47065 | 0.775 | 0.71 | 1 | HC_vs_MS.NoTrt_F |
| TNFSF8   | 0.11116 | 0.58528 | 0.159 | 0.22 | 1 | HC_vs_MS.NoTrt_F |
| WBP4     | 0.11133 | 0.66444 | 0.116 | 0.17 | 1 | HC_vs_MS.NoTrt_F |
| CENPO    | 0.11137 | 0.89932 | 0.072 | 0.12 | 1 | HC_vs_MS.NoTrt_F |
| DISP1    | 0.11145 | 0.55953 | 0.121 | 0.17 | 1 | HC_vs_MS.NoTrt_F |
| SUN2     | 0.11158 | 0.36516 | 0.422 | 0.54 | 1 | HC_vs_MS.NoTrt_F |
| OMA1     | 0.11167 | -0.4374 | 0.627 | 0.69 | 1 | HC_vs_MS.NoTrt_F |
| CCDC80   | 0.11168 | 0.88295 | 0.783 | 0.75 | 1 | HC_vs_MS.NoTrt_F |
| USP31    | 0.11181 | 0.61598 | 0.133 | 0.19 | 1 | HC_vs_MS.NoTrt_F |
| MAEA     | 0.11186 | -0.2818 | 0.653 | 0.71 | 1 | HC_vs_MS.NoTrt_F |
| CLSTN3   | 0.11193 | 0.39078 | 0.199 | 0.27 | 1 | HC_vs_MS.NoTrt_F |
| PI4KA    | 0.11221 | 0.59409 | 0.373 | 0.32 | 1 | HC_vs_MS.NoTrt_F |
| C15orf41 | 0.11268 | 0.3356  | 0.645 | 0.71 | 1 | HC_vs_MS.NoTrt_F |
| PLXDC2   | 0.11278 | 1.19338 | 0.74  | 0.69 | 1 | HC_vs_MS.NoTrt_F |
| RPL37A   | 0.11359 | 0.38302 | 0.867 | 0.91 | 1 | HC_vs_MS.NoTrt_F |
| PCGF1    | 0.11361 | -0.3515 | 0.402 | 0.46 | 1 | HC_vs_MS.NoTrt_F |
| LNPK     | 0.11389 | -0.2769 | 0.558 | 0.62 | 1 | HC_vs_MS.NoTrt_F |
| THAP9    | 0.11401 | 0.42207 | 0.639 | 0.57 | 1 | HC_vs_MS.NoTrt_F |
| ANAPC2   | 0.11422 | 0.92242 | 0.124 | 0.18 | 1 | HC_vs_MS.NoTrt_F |
| ZNF3     | 0.11427 | -0.7099 | 0.78  | 0.86 | 1 | HC_vs_MS.NoTrt_F |
| B4GALNT2 | 0.11453 | 0.41541 | 0.341 | 0.44 | 1 | HC_vs_MS.NoTrt_F |
| EHBP1L1  | 0.11461 | 0.56315 | 0.246 | 0.31 | 1 | HC_vs_MS.NoTrt_F |
| INPP4A   | 0.11478 | 0.34149 | 0.405 | 0.46 | 1 | HC_vs_MS.NoTrt_F |
| KIAA1549 | 0.11491 | 0.47293 | 0.396 | 0.47 | 1 | HC_vs_MS.NoTrt_F |
| TP53BP2  | 0.11511 | 1.30739 | 0.179 | 0.24 | 1 | HC_vs_MS.NoTrt_F |
| PLK1     | 0.11512 | 0.5312  | 0.465 | 0.53 | 1 | HC_vs_MS.NoTrt_F |
| FAM63B   | 0.11532 | -0.4399 | 0.769 | 0.79 | 1 | HC_vs_MS.NoTrt_F |
| PITHD1   | 0.11598 | 0.36613 | 0.191 | 0.25 | 1 | HC_vs_MS.NoTrt_F |
| ZNF581   | 0.11599 | 0.75411 | 0.116 | 0.17 | 1 | HC_vs_MS.NoTrt_F |
| SRSF8    | 0.11613 | -0.8861 | 0.671 | 0.7  | 1 | HC_vs_MS.NoTrt_F |
| C6orf136 | 0.11622 | 0.31684 | 0.121 | 0.17 | 1 | HC_vs_MS.NoTrt_F |
| AKAP2    | 0.11625 | -0.3311 | 0.312 | 0.38 | 1 | HC_vs_MS.NoTrt_F |
| EIF1AX   | 0.11639 | 0.58692 | 0.347 | 0.29 | 1 | HC_vs_MS.NoTrt_F |

|             |         |         |       |      |   |                  |
|-------------|---------|---------|-------|------|---|------------------|
| RAB8A       | 0.11645 | -0.3303 | 0.607 | 0.63 | 1 | HC_vs_MS.NoTrt_F |
| CPEB3       | 0.11649 | -0.9173 | 0.075 | 0.12 | 1 | HC_vs_MS.NoTrt_F |
| SCP2        | 0.11653 | 0.30901 | 0.306 | 0.39 | 1 | HC_vs_MS.NoTrt_F |
| TMEM241     | 0.11665 | 1.09743 | 0.694 | 0.65 | 1 | HC_vs_MS.NoTrt_F |
| TMEM39A     | 0.11673 | 0.56142 | 0.211 | 0.28 | 1 | HC_vs_MS.NoTrt_F |
| AMDHD1      | 0.11681 | 0.40565 | 0.214 | 0.28 | 1 | HC_vs_MS.NoTrt_F |
| TAF9        | 0.11685 | -0.3327 | 0.399 | 0.46 | 1 | HC_vs_MS.NoTrt_F |
| TBC1D2B     | 0.11694 | 0.59444 | 0.358 | 0.41 | 1 | HC_vs_MS.NoTrt_F |
| ZNF778      | 0.11712 | 0.73911 | 0.705 | 0.66 | 1 | HC_vs_MS.NoTrt_F |
| C1QTNF7     | 0.11717 | 0.48453 | 0.081 | 0.13 | 1 | HC_vs_MS.NoTrt_F |
| ARMCX4      | 0.11725 | 0.68255 | 0.223 | 0.29 | 1 | HC_vs_MS.NoTrt_F |
| ZNF100      | 0.11736 | 0.90313 | 0.864 | 0.83 | 1 | HC_vs_MS.NoTrt_F |
| MTPAP       | 0.11737 | -0.4266 | 0.873 | 0.91 | 1 | HC_vs_MS.NoTrt_F |
| SUGP1       | 0.11739 | -0.3651 | 0.486 | 0.53 | 1 | HC_vs_MS.NoTrt_F |
| RPS7        | 0.11745 | -0.2923 | 0.538 | 0.59 | 1 | HC_vs_MS.NoTrt_F |
| CCDC28A     | 0.11745 | -0.4882 | 0.251 | 0.31 | 1 | HC_vs_MS.NoTrt_F |
| TLK2        | 0.11754 | -0.2713 | 0.431 | 0.49 | 1 | HC_vs_MS.NoTrt_F |
| POLD4       | 0.11763 | 0.36298 | 0.85  | 0.87 | 1 | HC_vs_MS.NoTrt_F |
| SELO        | 0.11787 | 1.11056 | 0.081 | 0.13 | 1 | HC_vs_MS.NoTrt_F |
| C2orf42     | 0.11804 | 0.25276 | 0.182 | 0.24 | 1 | HC_vs_MS.NoTrt_F |
| NCLN        | 0.11805 | 0.32413 | 0.185 | 0.24 | 1 | HC_vs_MS.NoTrt_F |
| PDDC1       | 0.1181  | 0.31297 | 0.977 | 0.98 | 1 | HC_vs_MS.NoTrt_F |
| DISC1       | 0.11815 | 0.32328 | 0.558 | 0.48 | 1 | HC_vs_MS.NoTrt_F |
| ARL17A      | 0.1182  | 0.26675 | 0.679 | 0.77 | 1 | HC_vs_MS.NoTrt_F |
| RP11-894J14 | 0.11828 | -0.4211 | 0.139 | 0.19 | 1 | HC_vs_MS.NoTrt_F |
| FARP1       | 0.11867 | 0.31239 | 0.968 | 0.95 | 1 | HC_vs_MS.NoTrt_F |
| TIPARP      | 0.11869 | 0.39117 | 0.165 | 0.23 | 1 | HC_vs_MS.NoTrt_F |
| ZNF33A      | 0.11869 | -0.702  | 0.584 | 0.61 | 1 | HC_vs_MS.NoTrt_F |
| PPP1R9A     | 0.11872 | 0.33465 | 0.225 | 0.28 | 1 | HC_vs_MS.NoTrt_F |
| C12orf66    | 0.11905 | -0.5212 | 0.382 | 0.44 | 1 | HC_vs_MS.NoTrt_F |
| FUK         | 0.1191  | -1.1421 | 0.616 | 0.65 | 1 | HC_vs_MS.NoTrt_F |
| ZHX3        | 0.11911 | 0.67498 | 0.344 | 0.41 | 1 | HC_vs_MS.NoTrt_F |
| CMAS        | 0.11917 | 0.32356 | 0.13  | 0.18 | 1 | HC_vs_MS.NoTrt_F |
| CYP4B1      | 0.11921 | 0.35892 | 0.699 | 0.63 | 1 | HC_vs_MS.NoTrt_F |
| PDHB        | 0.11941 | -0.3025 | 0.844 | 0.9  | 1 | HC_vs_MS.NoTrt_F |
| LUC7L3      | 0.11955 | 0.2859  | 0.572 | 0.7  | 1 | HC_vs_MS.NoTrt_F |
| DNAJC7      | 0.11958 | -0.3308 | 0.977 | 0.97 | 1 | HC_vs_MS.NoTrt_F |
| MED13       | 0.11983 | 0.59202 | 0.595 | 0.56 | 1 | HC_vs_MS.NoTrt_F |
| HACL1       | 0.11995 | 0.40798 | 0.162 | 0.22 | 1 | HC_vs_MS.NoTrt_F |
| BMPR1A      | 0.12003 | 0.38912 | 0.803 | 0.79 | 1 | HC_vs_MS.NoTrt_F |



|            |         |         |       |      |   |                  |
|------------|---------|---------|-------|------|---|------------------|
| USE1       | 0.12031 | 0.39663 | 0.887 | 0.86 | 1 | HC_vs_MS.NoTrt_F |
| USP49      | 0.12046 | 0.64553 | 0.694 | 0.73 | 1 | HC_vs_MS.NoTrt_F |
| ZWILCH     | 0.12048 | -0.7484 | 0.694 | 0.73 | 1 | HC_vs_MS.NoTrt_F |
| DGKQ       | 0.12048 | 1.5097  | 0.09  | 0.14 | 1 | HC_vs_MS.NoTrt_F |
| MAPK8IP3   | 0.12049 | 0.43131 | 0.22  | 0.29 | 1 | HC_vs_MS.NoTrt_F |
| FAM53B     | 0.1205  | 0.47979 | 0.26  | 0.34 | 1 | HC_vs_MS.NoTrt_F |
| ZNF880     | 0.12066 | 0.28196 | 0.512 | 0.56 | 1 | HC_vs_MS.NoTrt_F |
| DHX40      | 0.12081 | 0.47976 | 0.147 | 0.2  | 1 | HC_vs_MS.NoTrt_F |
| ZNF623     | 0.12083 | 0.89588 | 0.72  | 0.72 | 1 | HC_vs_MS.NoTrt_F |
| PIP4K2B    | 0.12144 | -0.5431 | 0.153 | 0.2  | 1 | HC_vs_MS.NoTrt_F |
| SLC39A7    | 0.12148 | 0.25511 | 0.113 | 0.16 | 1 | HC_vs_MS.NoTrt_F |
| POLR2J3    | 0.12155 | 0.342   | 0.997 | 0.99 | 1 | HC_vs_MS.NoTrt_F |
| QPRT       | 0.1216  | 0.33593 | 0.936 | 0.88 | 1 | HC_vs_MS.NoTrt_F |
| TOE1       | 0.12162 | -0.5688 | 0.09  | 0.13 | 1 | HC_vs_MS.NoTrt_F |
| C2orf81    | 0.12198 | 0.31913 | 0.864 | 0.87 | 1 | HC_vs_MS.NoTrt_F |
| ABI2       | 0.12202 | 0.50536 | 0.899 | 0.88 | 1 | HC_vs_MS.NoTrt_F |
| POLR2J     | 0.12254 | 0.40582 | 0.231 | 0.3  | 1 | HC_vs_MS.NoTrt_F |
| CSF3R      | 0.12275 | 1.03795 | 0.711 | 0.71 | 1 | HC_vs_MS.NoTrt_F |
| NCOA7      | 0.12276 | 0.7109  | 0.801 | 0.77 | 1 | HC_vs_MS.NoTrt_F |
| AP2A1      | 0.12313 | -0.397  | 0.734 | 0.82 | 1 | HC_vs_MS.NoTrt_F |
| FUBP3      | 0.12314 | 0.35557 | 0.104 | 0.16 | 1 | HC_vs_MS.NoTrt_F |
| CLEC16A    | 0.1233  | 0.5887  | 0.694 | 0.67 | 1 | HC_vs_MS.NoTrt_F |
| AIMP2      | 0.12366 | -1.1267 | 0.358 | 0.42 | 1 | HC_vs_MS.NoTrt_F |
| NPTXR      | 0.12374 | 0.96982 | 0.355 | 0.42 | 1 | HC_vs_MS.NoTrt_F |
| TMEM156    | 0.12381 | -0.301  | 0.832 | 0.9  | 1 | HC_vs_MS.NoTrt_F |
| IL18BP     | 0.12397 | 0.39114 | 0.147 | 0.2  | 1 | HC_vs_MS.NoTrt_F |
| ATP1B1     | 0.12397 | 1.12401 | 0.306 | 0.39 | 1 | HC_vs_MS.NoTrt_F |
| SYS1       | 0.12418 | 0.55576 | 0.529 | 0.46 | 1 | HC_vs_MS.NoTrt_F |
| NEMP1      | 0.1245  | 0.57482 | 0.147 | 0.2  | 1 | HC_vs_MS.NoTrt_F |
| COG4       | 0.12466 | -0.4707 | 0.751 | 0.79 | 1 | HC_vs_MS.NoTrt_F |
| ST8SIA4    | 0.1249  | -0.5014 | 0.769 | 0.81 | 1 | HC_vs_MS.NoTrt_F |
| TBC1D3I    | 0.12498 | 0.36578 | 0.223 | 0.29 | 1 | HC_vs_MS.NoTrt_F |
| ZNF235     | 0.12507 | -1.1208 | 0.159 | 0.22 | 1 | HC_vs_MS.NoTrt_F |
| ZSCAN29    | 0.12517 | 0.59183 | 0.445 | 0.48 | 1 | HC_vs_MS.NoTrt_F |
| AMY2B      | 0.12577 | -0.4156 | 0.607 | 0.64 | 1 | HC_vs_MS.NoTrt_F |
| NBPF20     | 0.1258  | 0.91165 | 0.347 | 0.41 | 1 | HC_vs_MS.NoTrt_F |
| USP46      | 0.12582 | 0.46247 | 0.731 | 0.87 | 1 | HC_vs_MS.NoTrt_F |
| MARK4      | 0.126   | 0.27073 | 0.578 | 0.66 | 1 | HC_vs_MS.NoTrt_F |
| TIAM1      | 0.1261  | -0.3301 | 0.54  | 0.6  | 1 | HC_vs_MS.NoTrt_F |
| RP4-583P15 | 0.12623 | 0.29033 | 0.15  | 0.2  | 1 | HC_vs_MS.NoTrt_F |

|            |         |         |       |      |   |                  |
|------------|---------|---------|-------|------|---|------------------|
| KDM5D      | 0.12634 | -1.018  | 0.39  | 0.43 | 1 | HC_vs_MS.NoTrt_F |
| SOX6       | 0.12637 | -0.3284 | 0.448 | 0.5  | 1 | HC_vs_MS.NoTrt_F |
| PHAX       | 0.12644 | -0.4686 | 0.893 | 0.9  | 1 | HC_vs_MS.NoTrt_F |
| CAMKK1     | 0.12664 | -0.2983 | 0.22  | 0.28 | 1 | HC_vs_MS.NoTrt_F |
| ATAD2B     | 0.1267  | 0.51947 | 0.746 | 0.74 | 1 | HC_vs_MS.NoTrt_F |
| NUP35      | 0.12673 | 0.37249 | 0.662 | 0.61 | 1 | HC_vs_MS.NoTrt_F |
| FOXP2      | 0.12699 | 0.27851 | 0.257 | 0.32 | 1 | HC_vs_MS.NoTrt_F |
| TMEM186    | 0.12748 | -0.4805 | 0.526 | 0.61 | 1 | HC_vs_MS.NoTrt_F |
| KLHDC2     | 0.1279  | 0.45853 | 0.246 | 0.3  | 1 | HC_vs_MS.NoTrt_F |
| PLCD1      | 0.12822 | 1.24741 | 0.116 | 0.17 | 1 | HC_vs_MS.NoTrt_F |
| TMX4       | 0.12827 | -0.4095 | 0.636 | 0.62 | 1 | HC_vs_MS.NoTrt_F |
| UTP11      | 0.12884 | 0.69962 | 0.549 | 0.63 | 1 | HC_vs_MS.NoTrt_F |
| SERPINF1   | 0.12896 | 0.25038 | 0.827 | 0.88 | 1 | HC_vs_MS.NoTrt_F |
| AC013264.1 | 0.12901 | 0.3999  | 0.402 | 0.53 | 1 | HC_vs_MS.NoTrt_F |
| THTPA      | 0.12908 | 0.43716 | 0.139 | 0.19 | 1 | HC_vs_MS.NoTrt_F |
| CCNY       | 0.1292  | -0.3245 | 0.494 | 0.43 | 1 | HC_vs_MS.NoTrt_F |
| TMEM258    | 0.12927 | 0.52    | 0.361 | 0.45 | 1 | HC_vs_MS.NoTrt_F |
| KSR2       | 0.12931 | -0.5024 | 0.249 | 0.3  | 1 | HC_vs_MS.NoTrt_F |
| AKR1C2     | 0.12933 | 0.41071 | 0.107 | 0.16 | 1 | HC_vs_MS.NoTrt_F |
| ATP10A     | 0.12936 | 2.05817 | 0.116 | 0.17 | 1 | HC_vs_MS.NoTrt_F |
| DNPEP      | 0.12941 | -0.3689 | 0.48  | 0.52 | 1 | HC_vs_MS.NoTrt_F |
| ZNF234     | 0.12949 | 0.59627 | 0.835 | 0.79 | 1 | HC_vs_MS.NoTrt_F |
| EZH2       | 0.1296  | -0.3061 | 0.185 | 0.24 | 1 | HC_vs_MS.NoTrt_F |
| TFAM       | 0.12985 | 0.8184  | 0.321 | 0.39 | 1 | HC_vs_MS.NoTrt_F |
| PROSER1    | 0.12997 | 0.29845 | 0.208 | 0.27 | 1 | HC_vs_MS.NoTrt_F |
| SOS1       | 0.13012 | 0.37411 | 0.199 | 0.26 | 1 | HC_vs_MS.NoTrt_F |
| ZNF665     | 0.13016 | 0.2905  | 0.954 | 0.95 | 1 | HC_vs_MS.NoTrt_F |
| CEP162     | 0.13052 | -0.5307 | 0.217 | 0.28 | 1 | HC_vs_MS.NoTrt_F |
| ZXDB       | 0.1306  | 1.43786 | 0.087 | 0.13 | 1 | HC_vs_MS.NoTrt_F |
| C8orf59    | 0.13088 | -0.269  | 0.442 | 0.5  | 1 | HC_vs_MS.NoTrt_F |
| ALDH3B1    | 0.13098 | 0.2779  | 0.809 | 0.77 | 1 | HC_vs_MS.NoTrt_F |
| ELP6       | 0.13111 | -1.1237 | 0.647 | 0.69 | 1 | HC_vs_MS.NoTrt_F |
| TLR5       | 0.1313  | 0.59711 | 0.636 | 0.71 | 1 | HC_vs_MS.NoTrt_F |
| DHDDS      | 0.13133 | -0.6436 | 0.618 | 0.62 | 1 | HC_vs_MS.NoTrt_F |
| ZNF563     | 0.13138 | -0.2716 | 0.555 | 0.62 | 1 | HC_vs_MS.NoTrt_F |
| NAB1       | 0.13151 | 0.57876 | 0.153 | 0.21 | 1 | HC_vs_MS.NoTrt_F |
| TDP1       | 0.13154 | -0.2856 | 0.382 | 0.42 | 1 | HC_vs_MS.NoTrt_F |
| TRMT1L     | 0.13157 | 0.63432 | 0.124 | 0.17 | 1 | HC_vs_MS.NoTrt_F |
| RRM2B      | 0.13168 | -0.5607 | 0.182 | 0.24 | 1 | HC_vs_MS.NoTrt_F |
| ADK        | 0.13171 | 0.36126 | 0.289 | 0.36 | 1 | HC_vs_MS.NoTrt_F |

|            |         |         |       |      |   |                  |
|------------|---------|---------|-------|------|---|------------------|
| SWSAP1     | 0.13219 | 0.27072 | 0.783 | 0.71 | 1 | HC_vs_MS.NoTrt_F |
| WNT2B      | 0.13228 | 0.51913 | 0.509 | 0.56 | 1 | HC_vs_MS.NoTrt_F |
| FSD2       | 0.13242 | 0.31623 | 0.488 | 0.56 | 1 | HC_vs_MS.NoTrt_F |
| NUCKS1     | 0.13252 | 0.29778 | 0.5   | 0.6  | 1 | HC_vs_MS.NoTrt_F |
| PSENNEN    | 0.13262 | 0.31641 | 0.246 | 0.3  | 1 | HC_vs_MS.NoTrt_F |
| CLHC1      | 0.13299 | -0.4373 | 0.526 | 0.59 | 1 | HC_vs_MS.NoTrt_F |
| RCHY1      | 0.13307 | -0.2751 | 0.364 | 0.43 | 1 | HC_vs_MS.NoTrt_F |
| PRH1       | 0.13313 | 0.46291 | 0.133 | 0.19 | 1 | HC_vs_MS.NoTrt_F |
| UBA6       | 0.1332  | -0.292  | 0.514 | 0.56 | 1 | HC_vs_MS.NoTrt_F |
| PRRC1      | 0.13321 | -0.7356 | 0.448 | 0.49 | 1 | HC_vs_MS.NoTrt_F |
| SLC35D1    | 0.1333  | 0.3837  | 0.35  | 0.43 | 1 | HC_vs_MS.NoTrt_F |
| NR4A2      | 0.13343 | 0.54969 | 0.607 | 0.61 | 1 | HC_vs_MS.NoTrt_F |
| FSIP2      | 0.13346 | 0.34461 | 0.847 | 0.82 | 1 | HC_vs_MS.NoTrt_F |
| ODC1       | 0.13375 | 0.91185 | 0.142 | 0.2  | 1 | HC_vs_MS.NoTrt_F |
| LAT2       | 0.13395 | 1.05921 | 0.876 | 0.88 | 1 | HC_vs_MS.NoTrt_F |
| MTMR12     | 0.1346  | 0.43272 | 0.488 | 0.53 | 1 | HC_vs_MS.NoTrt_F |
| LIX1L      | 0.13473 | 0.4374  | 0.847 | 0.79 | 1 | HC_vs_MS.NoTrt_F |
| RAE1       | 0.13483 | 0.7524  | 0.139 | 0.19 | 1 | HC_vs_MS.NoTrt_F |
| CTNNA1     | 0.1349  | 0.26573 | 0.662 | 0.65 | 1 | HC_vs_MS.NoTrt_F |
| TFDP2      | 0.13495 | 0.40429 | 0.945 | 0.94 | 1 | HC_vs_MS.NoTrt_F |
| TP53BP1    | 0.13502 | -0.4589 | 0.306 | 0.37 | 1 | HC_vs_MS.NoTrt_F |
| MMACHC     | 0.13547 | 0.65276 | 0.916 | 0.89 | 1 | HC_vs_MS.NoTrt_F |
| RNF19B     | 0.13548 | 0.89706 | 0.069 | 0.11 | 1 | HC_vs_MS.NoTrt_F |
| SOX4       | 0.13565 | 1.12009 | 0.104 | 0.16 | 1 | HC_vs_MS.NoTrt_F |
| SGPL1      | 0.13581 | -0.4907 | 0.471 | 0.52 | 1 | HC_vs_MS.NoTrt_F |
| TRPM7      | 0.13587 | 1.1885  | 0.934 | 0.94 | 1 | HC_vs_MS.NoTrt_F |
| DDX1       | 0.13592 | 0.78156 | 0.205 | 0.27 | 1 | HC_vs_MS.NoTrt_F |
| ZNF99      | 0.13601 | 0.25821 | 0.627 | 0.55 | 1 | HC_vs_MS.NoTrt_F |
| MCFD2      | 0.13624 | 0.40381 | 0.934 | 0.95 | 1 | HC_vs_MS.NoTrt_F |
| ICK        | 0.13624 | -0.719  | 0.246 | 0.29 | 1 | HC_vs_MS.NoTrt_F |
| LY75-CD302 | 0.13642 | 2.44632 | 0.104 | 0.15 | 1 | HC_vs_MS.NoTrt_F |
| PFKFB2     | 0.13655 | -0.4211 | 0.225 | 0.28 | 1 | HC_vs_MS.NoTrt_F |
| P2RX5      | 0.13676 | 0.62987 | 0.113 | 0.16 | 1 | HC_vs_MS.NoTrt_F |
| BTNL9      | 0.13686 | 0.8184  | 0.931 | 0.88 | 1 | HC_vs_MS.NoTrt_F |
| C1orf27    | 0.13701 | -0.3578 | 0.24  | 0.29 | 1 | HC_vs_MS.NoTrt_F |
| FDX1       | 0.13709 | -0.3233 | 0.384 | 0.42 | 1 | HC_vs_MS.NoTrt_F |
| REEP3      | 0.13709 | -0.6827 | 0.486 | 0.53 | 1 | HC_vs_MS.NoTrt_F |
| PPFIBP2    | 0.13718 | -0.9262 | 0.286 | 0.34 | 1 | HC_vs_MS.NoTrt_F |
| TBL2       | 0.13729 | -0.3586 | 0.746 | 0.67 | 1 | HC_vs_MS.NoTrt_F |
| RBM38      | 0.13747 | 0.51969 | 0.202 | 0.27 | 1 | HC_vs_MS.NoTrt_F |

|           |         |         |       |      |   |                  |
|-----------|---------|---------|-------|------|---|------------------|
| FASN      | 0.13756 | 0.73449 | 0.171 | 0.23 | 1 | HC_vs_MS.NoTrt_F |
| CDYL2     | 0.13764 | 0.37353 | 0.127 | 0.18 | 1 | HC_vs_MS.NoTrt_F |
| RNF31     | 0.13837 | 0.42299 | 0.312 | 0.38 | 1 | HC_vs_MS.NoTrt_F |
| SPDYE5    | 0.1386  | 0.25961 | 0.494 | 0.57 | 1 | HC_vs_MS.NoTrt_F |
| WRN       | 0.13869 | -0.4787 | 0.587 | 0.58 | 1 | HC_vs_MS.NoTrt_F |
| GRIA4     | 0.13875 | 0.32223 | 0.191 | 0.14 | 1 | HC_vs_MS.NoTrt_F |
| PNPT1     | 0.13884 | 0.38699 | 0.882 | 0.92 | 1 | HC_vs_MS.NoTrt_F |
| GLCC1     | 0.13905 | 0.3145  | 0.286 | 0.36 | 1 | HC_vs_MS.NoTrt_F |
| TFEB      | 0.13927 | -0.7281 | 0.486 | 0.52 | 1 | HC_vs_MS.NoTrt_F |
| ZBTB7A    | 0.13958 | 0.37178 | 0.162 | 0.22 | 1 | HC_vs_MS.NoTrt_F |
| SLCO2B1   | 0.13964 | 0.75084 | 0.379 | 0.45 | 1 | HC_vs_MS.NoTrt_F |
| ITGB3BP   | 0.13964 | 0.36104 | 0.78  | 0.83 | 1 | HC_vs_MS.NoTrt_F |
| DMPK      | 0.1399  | 0.26931 | 0.668 | 0.74 | 1 | HC_vs_MS.NoTrt_F |
| PDCD2     | 0.14011 | 0.70028 | 0.15  | 0.2  | 1 | HC_vs_MS.NoTrt_F |
| PER1      | 0.14018 | 1.01816 | 0.587 | 0.56 | 1 | HC_vs_MS.NoTrt_F |
| HEATR6    | 0.14018 | 0.35834 | 0.607 | 0.66 | 1 | HC_vs_MS.NoTrt_F |
| FAIM      | 0.14025 | 0.50484 | 0.399 | 0.47 | 1 | HC_vs_MS.NoTrt_F |
| TBC1D15   | 0.14026 | -0.8507 | 0.592 | 0.66 | 1 | HC_vs_MS.NoTrt_F |
| SRL       | 0.14053 | 0.27192 | 0.483 | 0.43 | 1 | HC_vs_MS.NoTrt_F |
| B4GALT5   | 0.1407  | 0.40026 | 0.286 | 0.35 | 1 | HC_vs_MS.NoTrt_F |
| TMPRSS4   | 0.14092 | 0.28073 | 0.659 | 0.61 | 1 | HC_vs_MS.NoTrt_F |
| KIAA1683  | 0.14096 | 0.35828 | 0.717 | 0.67 | 1 | HC_vs_MS.NoTrt_F |
| CMSS1     | 0.14115 | 0.4678  | 0.763 | 0.79 | 1 | HC_vs_MS.NoTrt_F |
| DUSP23    | 0.14119 | 0.50171 | 0.136 | 0.19 | 1 | HC_vs_MS.NoTrt_F |
| GPR146    | 0.14136 | 0.97255 | 0.237 | 0.18 | 1 | HC_vs_MS.NoTrt_F |
| ANKRD30BL | 0.14139 | 0.28472 | 0.621 | 0.61 | 1 | HC_vs_MS.NoTrt_F |
| AGBL5     | 0.14141 | -0.7153 | 0.179 | 0.23 | 1 | HC_vs_MS.NoTrt_F |
| SART1     | 0.14153 | -0.5647 | 0.37  | 0.42 | 1 | HC_vs_MS.NoTrt_F |
| LMTK2     | 0.14169 | 0.62725 | 0.303 | 0.37 | 1 | HC_vs_MS.NoTrt_F |
| FAM188A   | 0.14223 | 0.62097 | 0.133 | 0.18 | 1 | HC_vs_MS.NoTrt_F |
| C18orf21  | 0.14243 | 0.31677 | 0.118 | 0.17 | 1 | HC_vs_MS.NoTrt_F |
| RCBTB1    | 0.14257 | 0.75623 | 0.168 | 0.23 | 1 | HC_vs_MS.NoTrt_F |
| ARHGAP31  | 0.14259 | 0.322   | 0.373 | 0.41 | 1 | HC_vs_MS.NoTrt_F |
| MSRB2     | 0.14311 | -0.2664 | 0.092 | 0.14 | 1 | HC_vs_MS.NoTrt_F |
| ENY2      | 0.14315 | 0.4786  | 0.63  | 0.55 | 1 | HC_vs_MS.NoTrt_F |
| MAFF      | 0.14315 | 0.33337 | 0.723 | 0.67 | 1 | HC_vs_MS.NoTrt_F |
| MAP4      | 0.14359 | 0.58594 | 0.815 | 0.82 | 1 | HC_vs_MS.NoTrt_F |
| CDC73     | 0.14398 | 0.49738 | 0.642 | 0.55 | 1 | HC_vs_MS.NoTrt_F |
| BCAT2     | 0.14398 | -0.4417 | 0.243 | 0.29 | 1 | HC_vs_MS.NoTrt_F |
| MAATS1    | 0.14422 | 0.27869 | 0.277 | 0.35 | 1 | HC_vs_MS.NoTrt_F |

|          |         |         |       |      |   |                  |
|----------|---------|---------|-------|------|---|------------------|
| TRAM2    | 0.14453 | 0.28042 | 0.309 | 0.36 | 1 | HC_vs_MS.NoTrt_F |
| C4BPB    | 0.1446  | 0.32893 | 0.85  | 0.85 | 1 | HC_vs_MS.NoTrt_F |
| ELL      | 0.14474 | 0.84075 | 0.197 | 0.27 | 1 | HC_vs_MS.NoTrt_F |
| SETD5    | 0.14503 | 0.50211 | 0.665 | 0.7  | 1 | HC_vs_MS.NoTrt_F |
| CCDC153  | 0.14507 | 0.5415  | 0.269 | 0.35 | 1 | HC_vs_MS.NoTrt_F |
| SIK1     | 0.14514 | 1.27007 | 0.159 | 0.22 | 1 | HC_vs_MS.NoTrt_F |
| GALNT1   | 0.14544 | 1.8548  | 0.101 | 0.15 | 1 | HC_vs_MS.NoTrt_F |
| ZNF462   | 0.1455  | 0.73382 | 0.24  | 0.19 | 1 | HC_vs_MS.NoTrt_F |
| TM2D2    | 0.14578 | 0.80221 | 0.454 | 0.4  | 1 | HC_vs_MS.NoTrt_F |
| DLG5     | 0.14609 | 0.42396 | 0.517 | 0.45 | 1 | HC_vs_MS.NoTrt_F |
| SIAH1    | 0.14672 | 0.57158 | 0.275 | 0.34 | 1 | HC_vs_MS.NoTrt_F |
| KCTD9    | 0.14681 | -1.0421 | 0.263 | 0.32 | 1 | HC_vs_MS.NoTrt_F |
| RBM41    | 0.14702 | 0.35009 | 0.428 | 0.5  | 1 | HC_vs_MS.NoTrt_F |
| THG1L    | 0.14722 | -0.5976 | 0.621 | 0.71 | 1 | HC_vs_MS.NoTrt_F |
| SIGLEC8  | 0.14776 | 0.54618 | 0.578 | 0.54 | 1 | HC_vs_MS.NoTrt_F |
| MRRF     | 0.14795 | -1.1172 | 0.685 | 0.67 | 1 | HC_vs_MS.NoTrt_F |
| TKFC     | 0.14812 | 0.84759 | 0.639 | 0.61 | 1 | HC_vs_MS.NoTrt_F |
| MTERF1   | 0.14815 | -0.959  | 0.254 | 0.3  | 1 | HC_vs_MS.NoTrt_F |
| PIGU     | 0.14823 | 0.97449 | 0.136 | 0.19 | 1 | HC_vs_MS.NoTrt_F |
| ACOT4    | 0.14838 | 0.33165 | 0.15  | 0.21 | 1 | HC_vs_MS.NoTrt_F |
| CDYL     | 0.14838 | -0.4064 | 0.107 | 0.16 | 1 | HC_vs_MS.NoTrt_F |
| DNAH7    | 0.14858 | 0.47966 | 0.694 | 0.67 | 1 | HC_vs_MS.NoTrt_F |
| C11orf21 | 0.14879 | 0.54414 | 0.173 | 0.23 | 1 | HC_vs_MS.NoTrt_F |
| DUSP2    | 0.14881 | 0.48332 | 0.332 | 0.43 | 1 | HC_vs_MS.NoTrt_F |
| ATPIF1   | 0.1489  | 0.68726 | 0.298 | 0.4  | 1 | HC_vs_MS.NoTrt_F |
| COL6A1   | 0.149   | 3.10279 | 0.107 | 0.07 | 1 | HC_vs_MS.NoTrt_F |
| FDPS     | 0.14925 | -0.2521 | 0.526 | 0.55 | 1 | HC_vs_MS.NoTrt_F |
| SNX19    | 0.14931 | 0.25145 | 0.269 | 0.34 | 1 | HC_vs_MS.NoTrt_F |
| ERGIC2   | 0.14937 | -0.3919 | 0.526 | 0.55 | 1 | HC_vs_MS.NoTrt_F |
| RXRA     | 0.14941 | 0.36461 | 0.225 | 0.29 | 1 | HC_vs_MS.NoTrt_F |
| ZNF549   | 0.14944 | 0.54241 | 0.688 | 0.73 | 1 | HC_vs_MS.NoTrt_F |
| ZDHHC17  | 0.14948 | 0.70341 | 0.341 | 0.42 | 1 | HC_vs_MS.NoTrt_F |
| NUDCD3   | 0.14948 | 0.51328 | 0.344 | 0.41 | 1 | HC_vs_MS.NoTrt_F |
| GRAPL    | 0.14955 | 0.93587 | 0.104 | 0.15 | 1 | HC_vs_MS.NoTrt_F |
| G2E3     | 0.1499  | -0.8927 | 0.549 | 0.58 | 1 | HC_vs_MS.NoTrt_F |
| SULT1A3  | 0.14994 | 0.29498 | 0.679 | 0.73 | 1 | HC_vs_MS.NoTrt_F |
| ZNF76    | 0.15011 | 0.42226 | 0.22  | 0.28 | 1 | HC_vs_MS.NoTrt_F |
| RIPK1    | 0.15035 | 0.33446 | 0.237 | 0.29 | 1 | HC_vs_MS.NoTrt_F |
| ATXN2    | 0.15056 | 0.26402 | 0.934 | 0.92 | 1 | HC_vs_MS.NoTrt_F |
| LRRC28   | 0.15072 | -0.4645 | 0.624 | 0.67 | 1 | HC_vs_MS.NoTrt_F |

|           |         |         |       |      |   |                  |
|-----------|---------|---------|-------|------|---|------------------|
| MGRN1     | 0.15079 | 0.31648 | 0.864 | 0.79 | 1 | HC_vs_MS.NoTrt_F |
| NAMPT     | 0.1509  | 0.85291 | 0.824 | 0.8  | 1 | HC_vs_MS.NoTrt_F |
| VWA7      | 0.15112 | 0.57718 | 0.387 | 0.46 | 1 | HC_vs_MS.NoTrt_F |
| LCA5L     | 0.15122 | 0.58693 | 0.416 | 0.5  | 1 | HC_vs_MS.NoTrt_F |
| TRPM1     | 0.15136 | 0.34384 | 0.133 | 0.18 | 1 | HC_vs_MS.NoTrt_F |
| RHOC      | 0.15137 | 0.90251 | 0.266 | 0.22 | 1 | HC_vs_MS.NoTrt_F |
| AARS      | 0.15166 | -0.432  | 0.428 | 0.5  | 1 | HC_vs_MS.NoTrt_F |
| TLR6      | 0.15169 | -0.4803 | 0.309 | 0.38 | 1 | HC_vs_MS.NoTrt_F |
| PRKCSH    | 0.15175 | 0.81194 | 0.725 | 0.72 | 1 | HC_vs_MS.NoTrt_F |
| ATP11C    | 0.15202 | 1.19588 | 0.09  | 0.13 | 1 | HC_vs_MS.NoTrt_F |
| HNRNPAB   | 0.15225 | 0.40186 | 0.223 | 0.29 | 1 | HC_vs_MS.NoTrt_F |
| LAX1      | 0.15248 | 0.28508 | 0.587 | 0.62 | 1 | HC_vs_MS.NoTrt_F |
| TNKS1BP1  | 0.15286 | 0.5442  | 0.118 | 0.08 | 1 | HC_vs_MS.NoTrt_F |
| WRAP73    | 0.15303 | -0.502  | 0.37  | 0.42 | 1 | HC_vs_MS.NoTrt_F |
| ADAT1     | 0.15304 | -0.6067 | 0.717 | 0.73 | 1 | HC_vs_MS.NoTrt_F |
| MCAM      | 0.1531  | 0.94133 | 0.598 | 0.53 | 1 | HC_vs_MS.NoTrt_F |
| PRPSAP2   | 0.1531  | -0.5903 | 0.653 | 0.71 | 1 | HC_vs_MS.NoTrt_F |
| RABGGTA   | 0.15313 | 0.2678  | 0.153 | 0.21 | 1 | HC_vs_MS.NoTrt_F |
| PLA2G5    | 0.15348 | 0.29261 | 0.309 | 0.26 | 1 | HC_vs_MS.NoTrt_F |
| BCAM      | 0.15392 | 0.54922 | 0.786 | 0.75 | 1 | HC_vs_MS.NoTrt_F |
| HIF3A     | 0.15508 | 0.37245 | 0.908 | 0.88 | 1 | HC_vs_MS.NoTrt_F |
| ALG12     | 0.15526 | 0.29616 | 0.197 | 0.25 | 1 | HC_vs_MS.NoTrt_F |
| SMN2      | 0.15547 | 0.27314 | 0.844 | 0.73 | 1 | HC_vs_MS.NoTrt_F |
| ST8SIA5   | 0.15582 | 0.27874 | 0.723 | 0.69 | 1 | HC_vs_MS.NoTrt_F |
| NEIL3     | 0.15592 | -0.7101 | 0.295 | 0.34 | 1 | HC_vs_MS.NoTrt_F |
| BIRC5     | 0.15599 | 0.50049 | 0.725 | 0.72 | 1 | HC_vs_MS.NoTrt_F |
| MPP7      | 0.15601 | 0.96308 | 0.347 | 0.41 | 1 | HC_vs_MS.NoTrt_F |
| DDX43     | 0.15605 | -0.6255 | 0.185 | 0.24 | 1 | HC_vs_MS.NoTrt_F |
| MT1X      | 0.15634 | 0.39782 | 0.165 | 0.22 | 1 | HC_vs_MS.NoTrt_F |
| DESI1     | 0.15646 | -0.3953 | 0.633 | 0.68 | 1 | HC_vs_MS.NoTrt_F |
| HELZ      | 0.15657 | 0.29729 | 0.699 | 0.76 | 1 | HC_vs_MS.NoTrt_F |
| B3GNT5    | 0.15663 | -0.8232 | 0.587 | 0.62 | 1 | HC_vs_MS.NoTrt_F |
| HIST1H2BG | 0.15673 | 0.25481 | 0.497 | 0.43 | 1 | HC_vs_MS.NoTrt_F |
| TMEM154   | 0.15701 | 0.2849  | 0.945 | 0.93 | 1 | HC_vs_MS.NoTrt_F |
| DNMBP     | 0.15706 | 1.66475 | 0.101 | 0.14 | 1 | HC_vs_MS.NoTrt_F |
| MPRIP     | 0.15708 | 0.36257 | 0.948 | 0.92 | 1 | HC_vs_MS.NoTrt_F |
| GOLGA8N   | 0.15722 | 0.6332  | 0.101 | 0.15 | 1 | HC_vs_MS.NoTrt_F |
| PCED1B    | 0.15761 | 0.62124 | 0.509 | 0.62 | 1 | HC_vs_MS.NoTrt_F |
| PLXNA4    | 0.15777 | 0.30286 | 0.104 | 0.15 | 1 | HC_vs_MS.NoTrt_F |
| TPCN2     | 0.15786 | -0.5477 | 0.682 | 0.75 | 1 | HC_vs_MS.NoTrt_F |

|          |         |         |       |      |   |                  |
|----------|---------|---------|-------|------|---|------------------|
| NAV3     | 0.15841 | 0.3023  | 0.754 | 0.72 | 1 | HC_vs_MS.NoTrt_F |
| TLL2     | 0.1585  | 0.32792 | 0.462 | 0.42 | 1 | HC_vs_MS.NoTrt_F |
| RNF114   | 0.15946 | -0.287  | 0.772 | 0.8  | 1 | HC_vs_MS.NoTrt_F |
| PDP2     | 0.15951 | -0.2905 | 0.835 | 0.8  | 1 | HC_vs_MS.NoTrt_F |
| SUFU     | 0.15953 | 0.26708 | 0.121 | 0.17 | 1 | HC_vs_MS.NoTrt_F |
| CYP20A1  | 0.15957 | -0.4028 | 0.919 | 0.92 | 1 | HC_vs_MS.NoTrt_F |
| WDR7     | 0.15971 | -1.5682 | 0.373 | 0.42 | 1 | HC_vs_MS.NoTrt_F |
| FANCM    | 0.15971 | -0.6884 | 0.133 | 0.18 | 1 | HC_vs_MS.NoTrt_F |
| ABCD3    | 0.15978 | -0.9316 | 0.176 | 0.23 | 1 | HC_vs_MS.NoTrt_F |
| NUDT7    | 0.15984 | 0.26667 | 0.24  | 0.29 | 1 | HC_vs_MS.NoTrt_F |
| SGF29    | 0.15989 | 0.4323  | 0.306 | 0.37 | 1 | HC_vs_MS.NoTrt_F |
| ZNF227   | 0.16041 | 0.48206 | 0.549 | 0.51 | 1 | HC_vs_MS.NoTrt_F |
| COQ5     | 0.16045 | 0.61952 | 0.876 | 0.9  | 1 | HC_vs_MS.NoTrt_F |
| C11orf80 | 0.16081 | 0.49684 | 0.494 | 0.56 | 1 | HC_vs_MS.NoTrt_F |
| RABL3    | 0.16135 | -0.7066 | 0.607 | 0.64 | 1 | HC_vs_MS.NoTrt_F |
| GPN3     | 0.1615  | 0.74643 | 0.379 | 0.45 | 1 | HC_vs_MS.NoTrt_F |
| RCC1L    | 0.16164 | -0.5515 | 0.301 | 0.35 | 1 | HC_vs_MS.NoTrt_F |
| SYTL2    | 0.16196 | 0.37566 | 0.754 | 0.74 | 1 | HC_vs_MS.NoTrt_F |
| CARHSP1  | 0.16273 | -0.634  | 0.688 | 0.72 | 1 | HC_vs_MS.NoTrt_F |
| 7-Mar    | 0.16295 | 0.50107 | 0.263 | 0.33 | 1 | HC_vs_MS.NoTrt_F |
| WRNIP1   | 0.16308 | 0.85866 | 0.133 | 0.18 | 1 | HC_vs_MS.NoTrt_F |
| NCKAP5L  | 0.16334 | 0.55261 | 0.714 | 0.67 | 1 | HC_vs_MS.NoTrt_F |
| PSKH1    | 0.1634  | 0.86853 | 0.13  | 0.18 | 1 | HC_vs_MS.NoTrt_F |
| NCOA1    | 0.16342 | 0.82282 | 0.223 | 0.28 | 1 | HC_vs_MS.NoTrt_F |
| TNFRSF19 | 0.16352 | 0.36542 | 0.182 | 0.24 | 1 | HC_vs_MS.NoTrt_F |
| ART4     | 0.1638  | 0.40161 | 0.572 | 0.5  | 1 | HC_vs_MS.NoTrt_F |
| SORBS1   | 0.1639  | -0.3483 | 0.269 | 0.33 | 1 | HC_vs_MS.NoTrt_F |
| ZNF66    | 0.16436 | -0.5092 | 0.671 | 0.62 | 1 | HC_vs_MS.NoTrt_F |
| KHSRP    | 0.16441 | 0.26601 | 0.153 | 0.2  | 1 | HC_vs_MS.NoTrt_F |
| GTSF1    | 0.16442 | -0.9734 | 0.324 | 0.27 | 1 | HC_vs_MS.NoTrt_F |
| CHMP2A   | 0.16445 | 0.4299  | 0.199 | 0.26 | 1 | HC_vs_MS.NoTrt_F |
| MLLT1    | 0.16451 | 1.29797 | 0.098 | 0.14 | 1 | HC_vs_MS.NoTrt_F |
| ZC2HC1C  | 0.1647  | -0.3479 | 0.124 | 0.17 | 1 | HC_vs_MS.NoTrt_F |
| CECR2    | 0.16483 | 0.61333 | 0.558 | 0.53 | 1 | HC_vs_MS.NoTrt_F |
| USP4     | 0.16499 | 0.28926 | 0.977 | 0.94 | 1 | HC_vs_MS.NoTrt_F |
| PAN2     | 0.16512 | 0.25689 | 0.353 | 0.4  | 1 | HC_vs_MS.NoTrt_F |
| MORN4    | 0.16517 | -0.4747 | 0.61  | 0.65 | 1 | HC_vs_MS.NoTrt_F |
| WIP1     | 0.16545 | 0.34684 | 0.893 | 0.89 | 1 | HC_vs_MS.NoTrt_F |
| GPAA1    | 0.16577 | 0.6171  | 0.182 | 0.24 | 1 | HC_vs_MS.NoTrt_F |
| CNTLN    | 0.16612 | 0.35923 | 0.436 | 0.36 | 1 | HC_vs_MS.NoTrt_F |

|            |         |         |       |      |   |                  |
|------------|---------|---------|-------|------|---|------------------|
| PAK1       | 0.16658 | -0.5927 | 0.202 | 0.26 | 1 | HC_vs_MS.NoTrt_F |
| SCARB1     | 0.16677 | 0.51796 | 0.587 | 0.51 | 1 | HC_vs_MS.NoTrt_F |
| CDAN1      | 0.16682 | 0.60993 | 0.529 | 0.56 | 1 | HC_vs_MS.NoTrt_F |
| ZNF460     | 0.16689 | 0.58331 | 0.22  | 0.28 | 1 | HC_vs_MS.NoTrt_F |
| TUBD1      | 0.16699 | -0.5026 | 0.775 | 0.82 | 1 | HC_vs_MS.NoTrt_F |
| POLD3      | 0.16707 | -1.2502 | 0.176 | 0.22 | 1 | HC_vs_MS.NoTrt_F |
| ENOX2      | 0.16711 | 0.68845 | 0.145 | 0.19 | 1 | HC_vs_MS.NoTrt_F |
| MALT1      | 0.16786 | 0.49404 | 0.153 | 0.2  | 1 | HC_vs_MS.NoTrt_F |
| SENP1      | 0.16813 | 0.74014 | 0.231 | 0.3  | 1 | HC_vs_MS.NoTrt_F |
| IPO11      | 0.16817 | 0.2956  | 0.173 | 0.23 | 1 | HC_vs_MS.NoTrt_F |
| ZNF385D    | 0.16853 | 0.34725 | 0.327 | 0.4  | 1 | HC_vs_MS.NoTrt_F |
| SGTA       | 0.16868 | -0.3223 | 0.59  | 0.64 | 1 | HC_vs_MS.NoTrt_F |
| ANKS1B     | 0.16885 | 0.29819 | 0.743 | 0.62 | 1 | HC_vs_MS.NoTrt_F |
| CEP63      | 0.16934 | -0.5262 | 0.786 | 0.8  | 1 | HC_vs_MS.NoTrt_F |
| ST13       | 0.16939 | 0.31241 | 0.355 | 0.44 | 1 | HC_vs_MS.NoTrt_F |
| SEC14L6    | 0.16943 | 0.44821 | 0.798 | 0.76 | 1 | HC_vs_MS.NoTrt_F |
| FSD1       | 0.16945 | 0.73595 | 0.457 | 0.42 | 1 | HC_vs_MS.NoTrt_F |
| STEAP4     | 0.16965 | 0.40369 | 0.743 | 0.76 | 1 | HC_vs_MS.NoTrt_F |
| MT-ATP6    | 0.16965 | 0.32731 | 0.89  | 0.92 | 1 | HC_vs_MS.NoTrt_F |
| CADM1      | 0.17014 | -0.9639 | 0.289 | 0.33 | 1 | HC_vs_MS.NoTrt_F |
| EHD2       | 0.17046 | 0.26547 | 0.884 | 0.91 | 1 | HC_vs_MS.NoTrt_F |
| AGAP3      | 0.1705  | 0.83934 | 0.072 | 0.11 | 1 | HC_vs_MS.NoTrt_F |
| TRABD      | 0.17063 | 0.27456 | 0.382 | 0.48 | 1 | HC_vs_MS.NoTrt_F |
| ABCA10     | 0.17078 | 1.30191 | 0.095 | 0.14 | 1 | HC_vs_MS.NoTrt_F |
| KIAA1614   | 0.17093 | 0.63313 | 0.335 | 0.38 | 1 | HC_vs_MS.NoTrt_F |
| ZNRF2      | 0.17094 | 1.31511 | 0.098 | 0.14 | 1 | HC_vs_MS.NoTrt_F |
| RPS6KA2    | 0.17094 | 0.46781 | 0.113 | 0.16 | 1 | HC_vs_MS.NoTrt_F |
| RIMKLB     | 0.17112 | 0.42754 | 0.118 | 0.16 | 1 | HC_vs_MS.NoTrt_F |
| RP11-111H1 | 0.17155 | -0.2915 | 0.136 | 0.18 | 1 | HC_vs_MS.NoTrt_F |
| SPECC1L-AD | 0.17255 | -0.9572 | 0.231 | 0.28 | 1 | HC_vs_MS.NoTrt_F |
| GOLGA6L9   | 0.17266 | 1.08479 | 0.072 | 0.11 | 1 | HC_vs_MS.NoTrt_F |
| UBE2Z      | 0.17286 | 0.29687 | 0.286 | 0.34 | 1 | HC_vs_MS.NoTrt_F |
| SLC25A29   | 0.17289 | 0.3386  | 0.387 | 0.45 | 1 | HC_vs_MS.NoTrt_F |
| HSDL2      | 0.17294 | -0.3759 | 0.185 | 0.24 | 1 | HC_vs_MS.NoTrt_F |
| GSTM4      | 0.1734  | 2.5792  | 0.211 | 0.17 | 1 | HC_vs_MS.NoTrt_F |
| GRAMD1B    | 0.17341 | -0.4083 | 0.312 | 0.37 | 1 | HC_vs_MS.NoTrt_F |
| MCOLN1     | 0.17416 | 0.37107 | 0.806 | 0.82 | 1 | HC_vs_MS.NoTrt_F |
| DUSP1      | 0.17421 | 0.28455 | 0.624 | 0.72 | 1 | HC_vs_MS.NoTrt_F |
| RPS27      | 0.17438 | 0.277   | 0.301 | 0.39 | 1 | HC_vs_MS.NoTrt_F |
| MLEC       | 0.1746  | 0.32869 | 0.15  | 0.2  | 1 | HC_vs_MS.NoTrt_F |



|          |         |         |       |      |   |                  |
|----------|---------|---------|-------|------|---|------------------|
| ZFP64    | 0.17464 | -0.5411 | 0.633 | 0.64 | 1 | HC_vs_MS.NoTrt_F |
| RELN     | 0.17503 | 0.2675  | 0.156 | 0.21 | 1 | HC_vs_MS.NoTrt_F |
| MAPK8    | 0.17506 | 0.33036 | 0.497 | 0.56 | 1 | HC_vs_MS.NoTrt_F |
| SPDYA    | 0.17514 | 0.27379 | 0.118 | 0.17 | 1 | HC_vs_MS.NoTrt_F |
| TESPA1   | 0.17518 | 0.26832 | 0.451 | 0.52 | 1 | HC_vs_MS.NoTrt_F |
| TRIM5    | 0.17561 | 0.41183 | 0.503 | 0.56 | 1 | HC_vs_MS.NoTrt_F |
| CAMK2N1  | 0.17569 | -0.3923 | 0.113 | 0.16 | 1 | HC_vs_MS.NoTrt_F |
| VNN3     | 0.17576 | 1.31362 | 0.477 | 0.47 | 1 | HC_vs_MS.NoTrt_F |
| LAMA4    | 0.176   | 0.78124 | 0.355 | 0.3  | 1 | HC_vs_MS.NoTrt_F |
| MOSPD1   | 0.17607 | -0.8129 | 0.217 | 0.27 | 1 | HC_vs_MS.NoTrt_F |
| ZSCAN31  | 0.17622 | 0.4762  | 0.139 | 0.1  | 1 | HC_vs_MS.NoTrt_F |
| CCDC86   | 0.17635 | 1.13947 | 0.09  | 0.13 | 1 | HC_vs_MS.NoTrt_F |
| PHF6     | 0.17649 | -0.957  | 0.714 | 0.74 | 1 | HC_vs_MS.NoTrt_F |
| TSC22D1  | 0.17668 | 1.7624  | 0.116 | 0.08 | 1 | HC_vs_MS.NoTrt_F |
| PABPC1L  | 0.17684 | 0.43717 | 0.321 | 0.39 | 1 | HC_vs_MS.NoTrt_F |
| SLC25A15 | 0.177   | -0.3245 | 0.754 | 0.7  | 1 | HC_vs_MS.NoTrt_F |
| PTPN20   | 0.17765 | 1.08868 | 0.081 | 0.12 | 1 | HC_vs_MS.NoTrt_F |
| DDX39B   | 0.17771 | 0.5121  | 0.783 | 0.8  | 1 | HC_vs_MS.NoTrt_F |
| GDAP2    | 0.17789 | 0.63287 | 0.766 | 0.69 | 1 | HC_vs_MS.NoTrt_F |
| SPATA5   | 0.17806 | 0.86897 | 0.798 | 0.73 | 1 | HC_vs_MS.NoTrt_F |
| ABCB8    | 0.17811 | 0.43427 | 0.627 | 0.56 | 1 | HC_vs_MS.NoTrt_F |
| SKIV2L   | 0.17819 | 0.69694 | 0.185 | 0.24 | 1 | HC_vs_MS.NoTrt_F |
| FGD4     | 0.17837 | 0.93402 | 0.861 | 0.84 | 1 | HC_vs_MS.NoTrt_F |
| ATM      | 0.17839 | 0.51293 | 0.977 | 0.95 | 1 | HC_vs_MS.NoTrt_F |
| ORMDL2   | 0.17842 | -0.2819 | 0.549 | 0.56 | 1 | HC_vs_MS.NoTrt_F |
| TSTD2    | 0.17849 | 0.54748 | 0.121 | 0.17 | 1 | HC_vs_MS.NoTrt_F |
| C2orf49  | 0.17874 | -0.3607 | 0.462 | 0.52 | 1 | HC_vs_MS.NoTrt_F |
| TCOF1    | 0.1788  | -0.3502 | 0.809 | 0.88 | 1 | HC_vs_MS.NoTrt_F |
| OSGEP    | 0.17883 | -0.5989 | 0.671 | 0.68 | 1 | HC_vs_MS.NoTrt_F |
| SEC11A   | 0.17884 | -0.3462 | 0.853 | 0.88 | 1 | HC_vs_MS.NoTrt_F |
| AGO2     | 0.17886 | 0.78262 | 0.468 | 0.45 | 1 | HC_vs_MS.NoTrt_F |
| FBXO18   | 0.17905 | -0.4667 | 0.448 | 0.5  | 1 | HC_vs_MS.NoTrt_F |
| ATG7     | 0.17917 | -0.621  | 0.63  | 0.69 | 1 | HC_vs_MS.NoTrt_F |
| UBXN8    | 0.17928 | 1.47479 | 0.22  | 0.28 | 1 | HC_vs_MS.NoTrt_F |
| ARID5A   | 0.17939 | 0.39062 | 0.225 | 0.29 | 1 | HC_vs_MS.NoTrt_F |
| NETO2    | 0.17943 | -0.4947 | 0.587 | 0.61 | 1 | HC_vs_MS.NoTrt_F |
| IFNAR1   | 0.17943 | 0.51377 | 0.561 | 0.51 | 1 | HC_vs_MS.NoTrt_F |
| SLC10A1  | 0.17955 | 1.6032  | 0.072 | 0.11 | 1 | HC_vs_MS.NoTrt_F |
| CENPM    | 0.18027 | -0.4916 | 0.382 | 0.43 | 1 | HC_vs_MS.NoTrt_F |
| GLA      | 0.18035 | 1.92113 | 0.084 | 0.13 | 1 | HC_vs_MS.NoTrt_F |

|            |         |         |       |      |   |                  |
|------------|---------|---------|-------|------|---|------------------|
| AAR2       | 0.18036 | 0.66064 | 0.266 | 0.32 | 1 | HC_vs_MS.NoTrt_F |
| 1-Dec      | 0.18052 | 0.33106 | 0.575 | 0.54 | 1 | HC_vs_MS.NoTrt_F |
| DAG1       | 0.18062 | 1.02417 | 0.604 | 0.59 | 1 | HC_vs_MS.NoTrt_F |
| IQCG       | 0.18092 | 0.37832 | 0.827 | 0.75 | 1 | HC_vs_MS.NoTrt_F |
| COPS6      | 0.18094 | 0.3283  | 0.708 | 0.66 | 1 | HC_vs_MS.NoTrt_F |
| ATXN2L     | 0.18102 | 0.95147 | 0.298 | 0.38 | 1 | HC_vs_MS.NoTrt_F |
| NFKB2      | 0.1814  | -0.3638 | 0.428 | 0.49 | 1 | HC_vs_MS.NoTrt_F |
| USF2       | 0.18155 | 0.31536 | 0.627 | 0.65 | 1 | HC_vs_MS.NoTrt_F |
| PHYH       | 0.18197 | 0.37674 | 0.309 | 0.35 | 1 | HC_vs_MS.NoTrt_F |
| EDEM1      | 0.18201 | 0.48101 | 0.335 | 0.43 | 1 | HC_vs_MS.NoTrt_F |
| NPHP1      | 0.1821  | 0.38909 | 0.746 | 0.72 | 1 | HC_vs_MS.NoTrt_F |
| RP9        | 0.1822  | 0.32669 | 0.127 | 0.17 | 1 | HC_vs_MS.NoTrt_F |
| NTHL1      | 0.18224 | -0.5076 | 0.075 | 0.11 | 1 | HC_vs_MS.NoTrt_F |
| TRDMT1     | 0.18244 | -0.2544 | 0.78  | 0.77 | 1 | HC_vs_MS.NoTrt_F |
| CPPED1     | 0.1826  | -0.2804 | 0.65  | 0.7  | 1 | HC_vs_MS.NoTrt_F |
| TGFBR2     | 0.18291 | 0.85064 | 0.277 | 0.23 | 1 | HC_vs_MS.NoTrt_F |
| GALNT9     | 0.18309 | -0.2693 | 0.223 | 0.27 | 1 | HC_vs_MS.NoTrt_F |
| CKAP4      | 0.18312 | 1.58346 | 0.11  | 0.16 | 1 | HC_vs_MS.NoTrt_F |
| TIMM44     | 0.18323 | 0.68332 | 0.673 | 0.77 | 1 | HC_vs_MS.NoTrt_F |
| EXOC6      | 0.18327 | 0.45261 | 0.341 | 0.38 | 1 | HC_vs_MS.NoTrt_F |
| HSD17B13   | 0.18331 | 0.65951 | 0.636 | 0.58 | 1 | HC_vs_MS.NoTrt_F |
| WHSC1      | 0.18342 | 0.5212  | 0.74  | 0.74 | 1 | HC_vs_MS.NoTrt_F |
| JOSD1      | 0.1835  | 0.4183  | 0.639 | 0.68 | 1 | HC_vs_MS.NoTrt_F |
| CTIF       | 0.18352 | 0.3701  | 0.234 | 0.29 | 1 | HC_vs_MS.NoTrt_F |
| CLEC7A     | 0.18368 | 0.88226 | 0.665 | 0.66 | 1 | HC_vs_MS.NoTrt_F |
| PPIL4      | 0.1838  | 0.28646 | 0.277 | 0.34 | 1 | HC_vs_MS.NoTrt_F |
| WDR59      | 0.18393 | -0.3836 | 0.951 | 0.98 | 1 | HC_vs_MS.NoTrt_F |
| CBLB       | 0.18398 | 1.12503 | 0.431 | 0.4  | 1 | HC_vs_MS.NoTrt_F |
| C1orf186   | 0.18406 | 1.12905 | 0.587 | 0.69 | 1 | HC_vs_MS.NoTrt_F |
| OSBPL7     | 0.18432 | 0.81391 | 0.116 | 0.16 | 1 | HC_vs_MS.NoTrt_F |
| FLT4       | 0.18439 | 0.65109 | 0.124 | 0.17 | 1 | HC_vs_MS.NoTrt_F |
| RP11-1212A | 0.18441 | 0.25014 | 0.546 | 0.49 | 1 | HC_vs_MS.NoTrt_F |
| ADGRE5     | 0.18448 | 0.54126 | 0.734 | 0.69 | 1 | HC_vs_MS.NoTrt_F |
| HPF1       | 0.18473 | 0.93886 | 0.145 | 0.19 | 1 | HC_vs_MS.NoTrt_F |
| PTPRM      | 0.18489 | 0.99146 | 0.225 | 0.29 | 1 | HC_vs_MS.NoTrt_F |
| TMEM52B    | 0.18509 | 0.38474 | 0.801 | 0.79 | 1 | HC_vs_MS.NoTrt_F |
| LMNB1      | 0.1851  | 0.30634 | 0.147 | 0.19 | 1 | HC_vs_MS.NoTrt_F |
| UBC        | 0.18528 | 0.70412 | 0.578 | 0.55 | 1 | HC_vs_MS.NoTrt_F |
| ATG14      | 0.18604 | 0.54629 | 0.72  | 0.66 | 1 | HC_vs_MS.NoTrt_F |
| WDR33      | 0.18618 | 0.66263 | 0.266 | 0.33 | 1 | HC_vs_MS.NoTrt_F |

|            |         |         |       |      |   |                  |
|------------|---------|---------|-------|------|---|------------------|
| GSTZ1      | 0.18624 | 0.80268 | 0.595 | 0.54 | 1 | HC_vs_MS.NoTrt_F |
| CCDC28B    | 0.18652 | -0.4802 | 0.483 | 0.51 | 1 | HC_vs_MS.NoTrt_F |
| C11orf71   | 0.1868  | 0.5999  | 0.118 | 0.16 | 1 | HC_vs_MS.NoTrt_F |
| ZNF559-ZNF | 0.18682 | 1.18968 | 0.069 | 0.11 | 1 | HC_vs_MS.NoTrt_F |
| TUBG2      | 0.18703 | -0.5329 | 0.147 | 0.19 | 1 | HC_vs_MS.NoTrt_F |
| ZNF566     | 0.18704 | -0.2986 | 0.934 | 0.87 | 1 | HC_vs_MS.NoTrt_F |
| CHRNA3     | 0.18745 | -0.3417 | 0.194 | 0.24 | 1 | HC_vs_MS.NoTrt_F |
| LRRC58     | 0.18747 | 0.81852 | 0.731 | 0.74 | 1 | HC_vs_MS.NoTrt_F |
| DDX25      | 0.18763 | 0.272   | 0.728 | 0.71 | 1 | HC_vs_MS.NoTrt_F |
| GPAT4      | 0.18773 | -0.2927 | 0.783 | 0.85 | 1 | HC_vs_MS.NoTrt_F |
| TPD52L1    | 0.18832 | 0.57888 | 0.769 | 0.79 | 1 | HC_vs_MS.NoTrt_F |
| PCBP1      | 0.1886  | 0.8223  | 0.561 | 0.56 | 1 | HC_vs_MS.NoTrt_F |
| IFT80      | 0.18942 | 0.67436 | 0.792 | 0.79 | 1 | HC_vs_MS.NoTrt_F |
| CYP2F1     | 0.18957 | 0.68876 | 0.185 | 0.24 | 1 | HC_vs_MS.NoTrt_F |
| DERA       | 0.18958 | 0.66124 | 0.113 | 0.16 | 1 | HC_vs_MS.NoTrt_F |
| PILRB      | 0.18967 | 0.4961  | 0.48  | 0.54 | 1 | HC_vs_MS.NoTrt_F |
| HDDC3      | 0.18971 | -1.0737 | 0.396 | 0.43 | 1 | HC_vs_MS.NoTrt_F |
| MIOS       | 0.18975 | 0.63142 | 0.306 | 0.37 | 1 | HC_vs_MS.NoTrt_F |
| TOM1L2     | 0.18975 | 0.47992 | 0.257 | 0.32 | 1 | HC_vs_MS.NoTrt_F |
| STYXL1     | 0.18977 | 0.43621 | 0.306 | 0.35 | 1 | HC_vs_MS.NoTrt_F |
| RAD23A     | 0.18988 | -0.2802 | 0.766 | 0.77 | 1 | HC_vs_MS.NoTrt_F |
| GMDS       | 0.19066 | 0.53673 | 0.194 | 0.25 | 1 | HC_vs_MS.NoTrt_F |
| RPS6KB2    | 0.19078 | -0.285  | 0.861 | 0.87 | 1 | HC_vs_MS.NoTrt_F |
| PTRH1      | 0.19098 | 0.36729 | 0.777 | 0.74 | 1 | HC_vs_MS.NoTrt_F |
| ATXN1L     | 0.19113 | 0.57372 | 0.127 | 0.17 | 1 | HC_vs_MS.NoTrt_F |
| ITGAE      | 0.19135 | -0.3427 | 0.601 | 0.67 | 1 | HC_vs_MS.NoTrt_F |
| PDZK1      | 0.19155 | 0.48017 | 0.355 | 0.29 | 1 | HC_vs_MS.NoTrt_F |
| EML2       | 0.19157 | 0.59603 | 0.714 | 0.68 | 1 | HC_vs_MS.NoTrt_F |
| ACRC       | 0.1916  | -0.3929 | 0.454 | 0.49 | 1 | HC_vs_MS.NoTrt_F |
| LAP3       | 0.19185 | 0.71998 | 0.197 | 0.25 | 1 | HC_vs_MS.NoTrt_F |
| GFI1B      | 0.19198 | 0.38262 | 0.581 | 0.64 | 1 | HC_vs_MS.NoTrt_F |
| THBS4      | 0.19201 | 1.63067 | 0.078 | 0.12 | 1 | HC_vs_MS.NoTrt_F |
| CXCR3      | 0.19234 | 0.43348 | 0.228 | 0.3  | 1 | HC_vs_MS.NoTrt_F |
| BMP8A      | 0.19245 | 0.35244 | 0.668 | 0.71 | 1 | HC_vs_MS.NoTrt_F |
| ZNF395     | 0.19251 | 0.92662 | 0.592 | 0.67 | 1 | HC_vs_MS.NoTrt_F |
| ATAD1      | 0.19273 | 0.26779 | 0.173 | 0.23 | 1 | HC_vs_MS.NoTrt_F |
| METTL8     | 0.19309 | 0.39252 | 0.948 | 0.93 | 1 | HC_vs_MS.NoTrt_F |
| ZSCAN12    | 0.19312 | 1.44593 | 0.468 | 0.4  | 1 | HC_vs_MS.NoTrt_F |
| GMEB2      | 0.19312 | 0.93773 | 0.13  | 0.17 | 1 | HC_vs_MS.NoTrt_F |
| PLCH2      | 0.19334 | 2.73371 | 0.104 | 0.15 | 1 | HC_vs_MS.NoTrt_F |

|            |         |         |       |      |   |                  |
|------------|---------|---------|-------|------|---|------------------|
| BCAS1      | 0.19392 | -1.0458 | 0.425 | 0.46 | 1 | HC_vs_MS.NoTrt_F |
| EXD1       | 0.19416 | 0.30791 | 0.581 | 0.55 | 1 | HC_vs_MS.NoTrt_F |
| NDUFV1     | 0.19426 | 0.25299 | 0.338 | 0.4  | 1 | HC_vs_MS.NoTrt_F |
| AC025335.1 | 0.19437 | -0.2838 | 0.685 | 0.58 | 1 | HC_vs_MS.NoTrt_F |
| TMEM38B    | 0.19454 | -0.5615 | 0.272 | 0.32 | 1 | HC_vs_MS.NoTrt_F |
| U2AF2      | 0.19463 | 0.53809 | 0.243 | 0.3  | 1 | HC_vs_MS.NoTrt_F |
| KMT2C      | 0.1947  | 0.3464  | 0.451 | 0.56 | 1 | HC_vs_MS.NoTrt_F |
| PLPP2      | 0.19493 | 0.33243 | 0.919 | 0.87 | 1 | HC_vs_MS.NoTrt_F |
| ABCF2      | 0.1952  | 0.43667 | 0.303 | 0.35 | 1 | HC_vs_MS.NoTrt_F |
| ABHD17A    | 0.19524 | 0.46368 | 0.136 | 0.18 | 1 | HC_vs_MS.NoTrt_F |
| LARP1      | 0.1956  | -0.3668 | 0.275 | 0.33 | 1 | HC_vs_MS.NoTrt_F |
| STX11      | 0.19569 | 0.83941 | 0.095 | 0.14 | 1 | HC_vs_MS.NoTrt_F |
| TCEA3      | 0.1957  | 1.56798 | 0.084 | 0.12 | 1 | HC_vs_MS.NoTrt_F |
| TMEM131    | 0.1957  | 0.34456 | 0.197 | 0.25 | 1 | HC_vs_MS.NoTrt_F |
| THAP3      | 0.19573 | 0.29955 | 0.145 | 0.19 | 1 | HC_vs_MS.NoTrt_F |
| MELTF      | 0.19581 | 0.42711 | 0.121 | 0.17 | 1 | HC_vs_MS.NoTrt_F |
| LARP4B     | 0.19584 | 0.68645 | 0.283 | 0.36 | 1 | HC_vs_MS.NoTrt_F |
| ATPAF2     | 0.19615 | 0.40788 | 0.503 | 0.56 | 1 | HC_vs_MS.NoTrt_F |
| MED19      | 0.19632 | 1.45044 | 0.113 | 0.16 | 1 | HC_vs_MS.NoTrt_F |
| AHSA2      | 0.1966  | 0.72582 | 0.283 | 0.34 | 1 | HC_vs_MS.NoTrt_F |
| P2RX5-TAX1 | 0.19661 | 0.3296  | 0.887 | 0.87 | 1 | HC_vs_MS.NoTrt_F |
| TRERF1     | 0.19681 | 0.57852 | 0.251 | 0.32 | 1 | HC_vs_MS.NoTrt_F |
| COQ4       | 0.19722 | 0.62514 | 0.922 | 0.9  | 1 | HC_vs_MS.NoTrt_F |
| ATP6V1H    | 0.1976  | 0.31378 | 0.434 | 0.5  | 1 | HC_vs_MS.NoTrt_F |
| ASH2L      | 0.19766 | -0.4041 | 0.633 | 0.67 | 1 | HC_vs_MS.NoTrt_F |
| HMGXB3     | 0.19795 | 0.88296 | 0.223 | 0.27 | 1 | HC_vs_MS.NoTrt_F |
| COG2       | 0.19797 | 0.93461 | 0.37  | 0.44 | 1 | HC_vs_MS.NoTrt_F |
| PITPNB     | 0.19804 | 0.28923 | 0.228 | 0.29 | 1 | HC_vs_MS.NoTrt_F |
| SPATA17    | 0.19812 | 0.25721 | 0.717 | 0.64 | 1 | HC_vs_MS.NoTrt_F |
| NLK        | 0.19821 | 0.77986 | 0.37  | 0.31 | 1 | HC_vs_MS.NoTrt_F |
| KLHL20     | 0.19842 | 0.2645  | 0.197 | 0.25 | 1 | HC_vs_MS.NoTrt_F |
| CTD-2331H1 | 0.19854 | -0.9121 | 0.217 | 0.27 | 1 | HC_vs_MS.NoTrt_F |
| GCHFR      | 0.19863 | 0.66891 | 0.136 | 0.18 | 1 | HC_vs_MS.NoTrt_F |
| COX8A      | 0.19866 | 0.27424 | 0.28  | 0.36 | 1 | HC_vs_MS.NoTrt_F |
| FAM129C    | 0.19871 | 0.29392 | 0.89  | 0.85 | 1 | HC_vs_MS.NoTrt_F |
| ENTPD7     | 0.19908 | 0.94204 | 0.384 | 0.44 | 1 | HC_vs_MS.NoTrt_F |
| MFSD12     | 0.1992  | 0.28561 | 0.295 | 0.34 | 1 | HC_vs_MS.NoTrt_F |
| PPAN       | 0.19945 | 0.36227 | 0.419 | 0.48 | 1 | HC_vs_MS.NoTrt_F |
| PCDHA9     | 0.19951 | 0.36191 | 0.673 | 0.62 | 1 | HC_vs_MS.NoTrt_F |
| GGCT       | 0.19993 | 1.06821 | 0.11  | 0.16 | 1 | HC_vs_MS.NoTrt_F |

|            |         |         |       |      |   |                  |
|------------|---------|---------|-------|------|---|------------------|
| PHB        | 0.2001  | 0.33018 | 0.199 | 0.25 | 1 | HC_vs_MS.NoTrt_F |
| IFI44      | 0.20018 | 1.08417 | 0.104 | 0.14 | 1 | HC_vs_MS.NoTrt_F |
| GRAMD3     | 0.20033 | 0.43464 | 0.757 | 0.86 | 1 | HC_vs_MS.NoTrt_F |
| HINFP      | 0.20036 | -0.5896 | 0.991 | 0.99 | 1 | HC_vs_MS.NoTrt_F |
| PDCD1      | 0.20048 | 0.27752 | 0.127 | 0.17 | 1 | HC_vs_MS.NoTrt_F |
| ITGAV      | 0.20067 | 0.60571 | 0.133 | 0.18 | 1 | HC_vs_MS.NoTrt_F |
| SLC25A13   | 0.20077 | 0.70617 | 0.165 | 0.22 | 1 | HC_vs_MS.NoTrt_F |
| WDR37      | 0.20085 | 0.8105  | 0.231 | 0.29 | 1 | HC_vs_MS.NoTrt_F |
| ANKHD1     | 0.20104 | 0.32702 | 0.494 | 0.6  | 1 | HC_vs_MS.NoTrt_F |
| CYBA       | 0.20127 | 0.56129 | 0.324 | 0.39 | 1 | HC_vs_MS.NoTrt_F |
| LINC01420  | 0.20146 | 0.61497 | 0.223 | 0.28 | 1 | HC_vs_MS.NoTrt_F |
| RAB30      | 0.20155 | 0.38849 | 0.382 | 0.43 | 1 | HC_vs_MS.NoTrt_F |
| STOM       | 0.20164 | 1.09729 | 0.668 | 0.64 | 1 | HC_vs_MS.NoTrt_F |
| FBXL8      | 0.20188 | 0.60592 | 0.618 | 0.64 | 1 | HC_vs_MS.NoTrt_F |
| ZCCHC14    | 0.20191 | 0.99721 | 0.139 | 0.18 | 1 | HC_vs_MS.NoTrt_F |
| OTUB1      | 0.20197 | 0.33764 | 0.931 | 0.98 | 1 | HC_vs_MS.NoTrt_F |
| C12orf40   | 0.20236 | -0.2853 | 0.298 | 0.36 | 1 | HC_vs_MS.NoTrt_F |
| HEMGN      | 0.20249 | -0.2532 | 0.15  | 0.2  | 1 | HC_vs_MS.NoTrt_F |
| FBXW4      | 0.2025  | 0.25719 | 0.506 | 0.56 | 1 | HC_vs_MS.NoTrt_F |
| AASDH      | 0.20265 | 0.72713 | 0.142 | 0.19 | 1 | HC_vs_MS.NoTrt_F |
| TTC39B     | 0.20282 | 0.90496 | 0.838 | 0.77 | 1 | HC_vs_MS.NoTrt_F |
| ZSWIM4     | 0.20289 | 1.19198 | 0.087 | 0.13 | 1 | HC_vs_MS.NoTrt_F |
| THBS1      | 0.20302 | -0.4925 | 0.263 | 0.3  | 1 | HC_vs_MS.NoTrt_F |
| CCND2      | 0.20302 | 0.38618 | 0.465 | 0.59 | 1 | HC_vs_MS.NoTrt_F |
| TBK1       | 0.20335 | 0.84029 | 0.127 | 0.17 | 1 | HC_vs_MS.NoTrt_F |
| NKAP       | 0.20381 | 0.31467 | 0.951 | 0.94 | 1 | HC_vs_MS.NoTrt_F |
| PANK2      | 0.20386 | -0.8444 | 0.575 | 0.56 | 1 | HC_vs_MS.NoTrt_F |
| IFT57      | 0.20405 | 0.83774 | 0.142 | 0.19 | 1 | HC_vs_MS.NoTrt_F |
| AL354822.1 | 0.20421 | 0.6512  | 0.286 | 0.33 | 1 | HC_vs_MS.NoTrt_F |
| PIK3C2A    | 0.20428 | 0.64338 | 0.431 | 0.48 | 1 | HC_vs_MS.NoTrt_F |
| FKBP2      | 0.20456 | 0.93411 | 0.13  | 0.18 | 1 | HC_vs_MS.NoTrt_F |
| TRANK1     | 0.20466 | 0.36731 | 0.263 | 0.32 | 1 | HC_vs_MS.NoTrt_F |
| LIPC       | 0.20476 | 0.40152 | 0.332 | 0.39 | 1 | HC_vs_MS.NoTrt_F |
| STXBP1     | 0.20483 | 0.83435 | 0.069 | 0.11 | 1 | HC_vs_MS.NoTrt_F |
| OFD1       | 0.2051  | 0.81242 | 0.298 | 0.37 | 1 | HC_vs_MS.NoTrt_F |
| TRIP4      | 0.20513 | -0.4674 | 0.575 | 0.6  | 1 | HC_vs_MS.NoTrt_F |
| SPAG4      | 0.20515 | 0.56435 | 0.28  | 0.35 | 1 | HC_vs_MS.NoTrt_F |
| CCNC       | 0.20532 | 0.28663 | 0.624 | 0.69 | 1 | HC_vs_MS.NoTrt_F |
| FAM193B    | 0.20533 | 0.55206 | 0.512 | 0.56 | 1 | HC_vs_MS.NoTrt_F |
| CCNB1IP1   | 0.20589 | 0.28453 | 0.858 | 0.83 | 1 | HC_vs_MS.NoTrt_F |

|           |         |         |       |      |   |                  |
|-----------|---------|---------|-------|------|---|------------------|
| HELLS     | 0.20594 | -0.4419 | 0.841 | 0.85 | 1 | HC_vs_MS.NoTrt_F |
| DIABLO    | 0.20599 | -0.543  | 0.749 | 0.8  | 1 | HC_vs_MS.NoTrt_F |
| WWTR1     | 0.20619 | 0.44567 | 0.474 | 0.52 | 1 | HC_vs_MS.NoTrt_F |
| BICDL1    | 0.20626 | 0.44884 | 0.662 | 0.66 | 1 | HC_vs_MS.NoTrt_F |
| NEUROD2   | 0.2064  | 0.40557 | 0.277 | 0.22 | 1 | HC_vs_MS.NoTrt_F |
| C20orf194 | 0.2066  | 0.62827 | 0.344 | 0.41 | 1 | HC_vs_MS.NoTrt_F |
| MLLT11    | 0.2066  | 0.28586 | 0.194 | 0.25 | 1 | HC_vs_MS.NoTrt_F |
| AP1G2     | 0.20661 | 0.43218 | 0.731 | 0.74 | 1 | HC_vs_MS.NoTrt_F |
| LBHD1     | 0.207   | -0.2985 | 0.523 | 0.56 | 1 | HC_vs_MS.NoTrt_F |
| SLC39A13  | 0.20708 | 0.76505 | 0.179 | 0.23 | 1 | HC_vs_MS.NoTrt_F |
| TES       | 0.20708 | -0.5288 | 0.87  | 0.89 | 1 | HC_vs_MS.NoTrt_F |
| LIPE      | 0.20722 | 0.81772 | 0.396 | 0.44 | 1 | HC_vs_MS.NoTrt_F |
| NR1D2     | 0.20739 | 0.29217 | 0.185 | 0.24 | 1 | HC_vs_MS.NoTrt_F |
| LETM2     | 0.20751 | 0.35683 | 0.798 | 0.81 | 1 | HC_vs_MS.NoTrt_F |
| ANGEL1    | 0.20768 | 0.58985 | 0.471 | 0.51 | 1 | HC_vs_MS.NoTrt_F |
| LIN54     | 0.20776 | -0.705  | 0.653 | 0.66 | 1 | HC_vs_MS.NoTrt_F |
| TEX14     | 0.20795 | 1.13284 | 0.116 | 0.16 | 1 | HC_vs_MS.NoTrt_F |
| HIST1H4C  | 0.20796 | 0.5924  | 0.387 | 0.51 | 1 | HC_vs_MS.NoTrt_F |
| TAPT1     | 0.20803 | 0.39294 | 0.78  | 0.76 | 1 | HC_vs_MS.NoTrt_F |
| AFAP1L1   | 0.20812 | 1.16873 | 0.569 | 0.48 | 1 | HC_vs_MS.NoTrt_F |
| BANK1     | 0.20824 | 0.79856 | 0.197 | 0.25 | 1 | HC_vs_MS.NoTrt_F |
| KBTBD2    | 0.20843 | 0.35215 | 0.72  | 0.69 | 1 | HC_vs_MS.NoTrt_F |
| BRD7      | 0.20845 | 0.69609 | 0.673 | 0.63 | 1 | HC_vs_MS.NoTrt_F |
| FAM76A    | 0.20875 | -0.2741 | 0.855 | 0.85 | 1 | HC_vs_MS.NoTrt_F |
| WSB2      | 0.20879 | 0.58618 | 0.832 | 0.85 | 1 | HC_vs_MS.NoTrt_F |
| HIST1H2AG | 0.20886 | 1.06074 | 0.37  | 0.42 | 1 | HC_vs_MS.NoTrt_F |
| SLC5A3    | 0.20927 | 0.6312  | 0.162 | 0.21 | 1 | HC_vs_MS.NoTrt_F |
| TFDP1     | 0.21039 | 0.43428 | 0.075 | 0.11 | 1 | HC_vs_MS.NoTrt_F |
| HIPK3     | 0.21041 | 0.65917 | 0.179 | 0.23 | 1 | HC_vs_MS.NoTrt_F |
| FAM101B   | 0.21042 | 0.80178 | 0.324 | 0.4  | 1 | HC_vs_MS.NoTrt_F |
| BCDIN3D   | 0.21053 | -0.8659 | 0.454 | 0.46 | 1 | HC_vs_MS.NoTrt_F |
| NDUFS4    | 0.21055 | 0.34906 | 0.353 | 0.4  | 1 | HC_vs_MS.NoTrt_F |
| BVES      | 0.21079 | 0.25518 | 0.772 | 0.75 | 1 | HC_vs_MS.NoTrt_F |
| SLC41A1   | 0.2112  | 0.51254 | 0.179 | 0.23 | 1 | HC_vs_MS.NoTrt_F |
| ZNF526    | 0.21126 | -0.3235 | 0.532 | 0.56 | 1 | HC_vs_MS.NoTrt_F |
| FBXO9     | 0.21158 | -0.2558 | 0.803 | 0.84 | 1 | HC_vs_MS.NoTrt_F |
| SMCR8     | 0.21162 | 0.68087 | 0.309 | 0.36 | 1 | HC_vs_MS.NoTrt_F |
| FBXO5     | 0.2118  | 1.28927 | 0.431 | 0.49 | 1 | HC_vs_MS.NoTrt_F |
| PLA2G2C   | 0.2119  | 0.34814 | 0.581 | 0.53 | 1 | HC_vs_MS.NoTrt_F |
| MBNL3     | 0.21199 | 0.68784 | 0.15  | 0.2  | 1 | HC_vs_MS.NoTrt_F |

|           |         |         |       |      |   |                  |
|-----------|---------|---------|-------|------|---|------------------|
| SRP72     | 0.21212 | 0.35198 | 0.295 | 0.35 | 1 | HC_vs_MS.NoTrt_F |
| SUCLG1    | 0.21217 | -0.3119 | 0.425 | 0.46 | 1 | HC_vs_MS.NoTrt_F |
| C9orf64   | 0.21255 | -0.6484 | 0.592 | 0.62 | 1 | HC_vs_MS.NoTrt_F |
| ANKRD28   | 0.21256 | 0.91503 | 0.439 | 0.5  | 1 | HC_vs_MS.NoTrt_F |
| GTF3C4    | 0.21275 | 0.5341  | 0.35  | 0.4  | 1 | HC_vs_MS.NoTrt_F |
| LEMD3     | 0.21279 | -0.6567 | 0.714 | 0.74 | 1 | HC_vs_MS.NoTrt_F |
| SMN1      | 0.21284 | 0.25233 | 0.402 | 0.48 | 1 | HC_vs_MS.NoTrt_F |
| UBR4      | 0.21309 | 0.25919 | 0.775 | 0.82 | 1 | HC_vs_MS.NoTrt_F |
| UVRAG     | 0.2131  | 0.55042 | 0.41  | 0.46 | 1 | HC_vs_MS.NoTrt_F |
| ACSM3     | 0.2133  | 0.32333 | 0.679 | 0.69 | 1 | HC_vs_MS.NoTrt_F |
| PTGIS     | 0.21331 | 0.76981 | 0.746 | 0.75 | 1 | HC_vs_MS.NoTrt_F |
| ARHGAP18  | 0.21336 | 0.56745 | 0.15  | 0.19 | 1 | HC_vs_MS.NoTrt_F |
| SLC7A5    | 0.21344 | 0.25862 | 0.147 | 0.19 | 1 | HC_vs_MS.NoTrt_F |
| MCRS1     | 0.21344 | 0.49637 | 0.217 | 0.28 | 1 | HC_vs_MS.NoTrt_F |
| ZNF274    | 0.2136  | -0.584  | 0.645 | 0.7  | 1 | HC_vs_MS.NoTrt_F |
| PGAP3     | 0.21363 | -0.7616 | 0.153 | 0.2  | 1 | HC_vs_MS.NoTrt_F |
| ZDHHC20   | 0.21415 | 0.35729 | 0.526 | 0.56 | 1 | HC_vs_MS.NoTrt_F |
| EPS8      | 0.2144  | 0.3322  | 0.488 | 0.54 | 1 | HC_vs_MS.NoTrt_F |
| CCDC120   | 0.21458 | 1.40704 | 0.587 | 0.65 | 1 | HC_vs_MS.NoTrt_F |
| CCDC163   | 0.21473 | 0.6506  | 0.616 | 0.55 | 1 | HC_vs_MS.NoTrt_F |
| KDM4A     | 0.21481 | 0.38689 | 0.188 | 0.24 | 1 | HC_vs_MS.NoTrt_F |
| ARSB      | 0.21529 | 0.62214 | 0.685 | 0.59 | 1 | HC_vs_MS.NoTrt_F |
| MYBBP1A   | 0.21529 | -0.3278 | 0.176 | 0.22 | 1 | HC_vs_MS.NoTrt_F |
| IQCK      | 0.21557 | -0.4906 | 0.231 | 0.28 | 1 | HC_vs_MS.NoTrt_F |
| SARNP     | 0.21558 | -0.3008 | 0.61  | 0.65 | 1 | HC_vs_MS.NoTrt_F |
| ARMCX3    | 0.21657 | 0.59213 | 0.116 | 0.16 | 1 | HC_vs_MS.NoTrt_F |
| TNFRSF10B | 0.21677 | 0.41169 | 0.46  | 0.51 | 1 | HC_vs_MS.NoTrt_F |
| ZNF318    | 0.2168  | 1.19097 | 0.711 | 0.7  | 1 | HC_vs_MS.NoTrt_F |
| QRICH2    | 0.21682 | 0.5063  | 0.217 | 0.27 | 1 | HC_vs_MS.NoTrt_F |
| PIPOX     | 0.2171  | -0.3613 | 0.584 | 0.6  | 1 | HC_vs_MS.NoTrt_F |
| ESF1      | 0.21714 | -0.4482 | 0.205 | 0.25 | 1 | HC_vs_MS.NoTrt_F |
| ELOVL1    | 0.21742 | 0.42656 | 0.205 | 0.26 | 1 | HC_vs_MS.NoTrt_F |
| TMEM217   | 0.2175  | 0.54219 | 0.113 | 0.16 | 1 | HC_vs_MS.NoTrt_F |
| LGALS9    | 0.21755 | 0.5838  | 0.298 | 0.36 | 1 | HC_vs_MS.NoTrt_F |
| HOOK2     | 0.21792 | 0.25547 | 0.98  | 0.97 | 1 | HC_vs_MS.NoTrt_F |
| CFD       | 0.21821 | 1.27397 | 0.197 | 0.24 | 1 | HC_vs_MS.NoTrt_F |
| TFG       | 0.21843 | 0.26743 | 0.191 | 0.24 | 1 | HC_vs_MS.NoTrt_F |
| WDTC1     | 0.21848 | 0.28972 | 0.399 | 0.44 | 1 | HC_vs_MS.NoTrt_F |
| YAF2      | 0.21873 | -0.4647 | 0.769 | 0.81 | 1 | HC_vs_MS.NoTrt_F |
| MCM8      | 0.21879 | -0.3541 | 0.78  | 0.72 | 1 | HC_vs_MS.NoTrt_F |

|           |         |         |       |      |   |                  |
|-----------|---------|---------|-------|------|---|------------------|
| PIK3R4    | 0.21884 | 0.96774 | 0.182 | 0.23 | 1 | HC_vs_MS.NoTrt_F |
| LRRC1     | 0.21887 | -0.4565 | 0.306 | 0.35 | 1 | HC_vs_MS.NoTrt_F |
| EIF2B4    | 0.21895 | 0.48848 | 0.54  | 0.61 | 1 | HC_vs_MS.NoTrt_F |
| CC2D2A    | 0.21898 | 0.67843 | 0.257 | 0.31 | 1 | HC_vs_MS.NoTrt_F |
| NEDD1     | 0.21926 | 0.68223 | 0.15  | 0.2  | 1 | HC_vs_MS.NoTrt_F |
| GSDMA     | 0.21945 | 0.28034 | 0.734 | 0.68 | 1 | HC_vs_MS.NoTrt_F |
| CINP      | 0.2196  | 0.40715 | 0.899 | 0.9  | 1 | HC_vs_MS.NoTrt_F |
| LMF1      | 0.21971 | 0.78239 | 0.156 | 0.2  | 1 | HC_vs_MS.NoTrt_F |
| RNASEL    | 0.21995 | 0.32725 | 0.39  | 0.45 | 1 | HC_vs_MS.NoTrt_F |
| LIFR      | 0.22002 | 0.464   | 0.142 | 0.19 | 1 | HC_vs_MS.NoTrt_F |
| POLH      | 0.22022 | -0.3938 | 0.598 | 0.61 | 1 | HC_vs_MS.NoTrt_F |
| TOP1      | 0.22044 | 0.40462 | 0.225 | 0.28 | 1 | HC_vs_MS.NoTrt_F |
| CDKN1A    | 0.22073 | 0.41647 | 0.182 | 0.24 | 1 | HC_vs_MS.NoTrt_F |
| FOPNL     | 0.22079 | -0.2808 | 0.65  | 0.64 | 1 | HC_vs_MS.NoTrt_F |
| RPP21     | 0.22117 | 0.34606 | 0.197 | 0.25 | 1 | HC_vs_MS.NoTrt_F |
| PIK3AP1   | 0.22121 | 1.13514 | 0.147 | 0.19 | 1 | HC_vs_MS.NoTrt_F |
| PEX13     | 0.22125 | -0.7493 | 0.783 | 0.77 | 1 | HC_vs_MS.NoTrt_F |
| MOB4      | 0.22143 | -0.5469 | 0.419 | 0.44 | 1 | HC_vs_MS.NoTrt_F |
| HPS3      | 0.22149 | 0.54663 | 0.341 | 0.37 | 1 | HC_vs_MS.NoTrt_F |
| CXorf21   | 0.22157 | -1.4175 | 0.355 | 0.41 | 1 | HC_vs_MS.NoTrt_F |
| PXK       | 0.22205 | 0.57196 | 0.153 | 0.2  | 1 | HC_vs_MS.NoTrt_F |
| RFC2      | 0.22252 | 0.37369 | 0.751 | 0.77 | 1 | HC_vs_MS.NoTrt_F |
| RELT      | 0.22292 | 0.69577 | 0.11  | 0.16 | 1 | HC_vs_MS.NoTrt_F |
| PIKFYVE   | 0.22303 | 0.55394 | 0.41  | 0.46 | 1 | HC_vs_MS.NoTrt_F |
| INTS6     | 0.22321 | -0.3973 | 0.954 | 0.96 | 1 | HC_vs_MS.NoTrt_F |
| CAPN3     | 0.22352 | -0.5628 | 0.098 | 0.13 | 1 | HC_vs_MS.NoTrt_F |
| SLC48A1   | 0.22406 | -0.5457 | 0.633 | 0.72 | 1 | HC_vs_MS.NoTrt_F |
| GALNT11   | 0.22425 | 0.29526 | 0.512 | 0.44 | 1 | HC_vs_MS.NoTrt_F |
| ATP7A     | 0.22439 | 0.82863 | 0.399 | 0.45 | 1 | HC_vs_MS.NoTrt_F |
| GCDH      | 0.22452 | 0.27423 | 0.197 | 0.24 | 1 | HC_vs_MS.NoTrt_F |
| DDAH2     | 0.22477 | -0.5969 | 0.118 | 0.16 | 1 | HC_vs_MS.NoTrt_F |
| ST3GAL5   | 0.22508 | 0.27517 | 0.295 | 0.35 | 1 | HC_vs_MS.NoTrt_F |
| CTRC      | 0.2252  | 0.33487 | 0.702 | 0.7  | 1 | HC_vs_MS.NoTrt_F |
| C2orf61   | 0.2259  | -0.5727 | 0.15  | 0.19 | 1 | HC_vs_MS.NoTrt_F |
| DSN1      | 0.2259  | -0.6698 | 0.289 | 0.34 | 1 | HC_vs_MS.NoTrt_F |
| RAB11FIP3 | 0.22595 | 0.69172 | 0.211 | 0.26 | 1 | HC_vs_MS.NoTrt_F |
| CEP76     | 0.2261  | 0.42047 | 0.827 | 0.83 | 1 | HC_vs_MS.NoTrt_F |
| SNX14     | 0.22613 | -0.3687 | 0.59  | 0.62 | 1 | HC_vs_MS.NoTrt_F |
| ATP5E     | 0.22632 | 0.47564 | 0.491 | 0.67 | 1 | HC_vs_MS.NoTrt_F |
| PLEK      | 0.22646 | 2.31614 | 0.084 | 0.12 | 1 | HC_vs_MS.NoTrt_F |



|            |         |         |       |      |   |                  |
|------------|---------|---------|-------|------|---|------------------|
| ATP6V1B2   | 0.22663 | -0.4327 | 0.711 | 0.75 | 1 | HC_vs_MS.NoTrt_F |
| ALPK1      | 0.22681 | 0.60768 | 0.806 | 0.77 | 1 | HC_vs_MS.NoTrt_F |
| TBL1X      | 0.22682 | -0.4569 | 0.65  | 0.6  | 1 | HC_vs_MS.NoTrt_F |
| AKT1       | 0.22716 | 0.806   | 0.254 | 0.31 | 1 | HC_vs_MS.NoTrt_F |
| CLPX       | 0.22744 | -0.9346 | 0.731 | 0.76 | 1 | HC_vs_MS.NoTrt_F |
| PRCP       | 0.22745 | 0.65576 | 0.858 | 0.79 | 1 | HC_vs_MS.NoTrt_F |
| RP11-6L6.2 | 0.22763 | -0.3628 | 0.078 | 0.11 | 1 | HC_vs_MS.NoTrt_F |
| STEAP3     | 0.22764 | -0.7493 | 0.185 | 0.23 | 1 | HC_vs_MS.NoTrt_F |
| ZNF714     | 0.2277  | 0.36899 | 0.96  | 0.93 | 1 | HC_vs_MS.NoTrt_F |
| AP2A2      | 0.228   | 0.30441 | 0.757 | 0.7  | 1 | HC_vs_MS.NoTrt_F |
| FAM133B    | 0.22811 | -0.4982 | 0.798 | 0.81 | 1 | HC_vs_MS.NoTrt_F |
| DNAH3      | 0.22816 | -0.2715 | 0.538 | 0.54 | 1 | HC_vs_MS.NoTrt_F |
| FAM96B     | 0.2284  | 0.27344 | 0.257 | 0.31 | 1 | HC_vs_MS.NoTrt_F |
| DICER1     | 0.22885 | -0.2869 | 0.237 | 0.28 | 1 | HC_vs_MS.NoTrt_F |
| DROSHA     | 0.22916 | 0.43063 | 0.37  | 0.43 | 1 | HC_vs_MS.NoTrt_F |
| TNRC6A     | 0.22946 | 0.34181 | 0.887 | 0.85 | 1 | HC_vs_MS.NoTrt_F |
| GGT7       | 0.23022 | 0.47717 | 0.194 | 0.24 | 1 | HC_vs_MS.NoTrt_F |
| LARGE1     | 0.23056 | 0.53974 | 0.613 | 0.6  | 1 | HC_vs_MS.NoTrt_F |
| PZP        | 0.23095 | 1.34678 | 0.15  | 0.12 | 1 | HC_vs_MS.NoTrt_F |
| PAK6       | 0.23099 | 0.39284 | 0.179 | 0.23 | 1 | HC_vs_MS.NoTrt_F |
| URM1       | 0.23169 | 0.406   | 0.194 | 0.24 | 1 | HC_vs_MS.NoTrt_F |
| GRAP       | 0.23179 | 0.39212 | 0.225 | 0.28 | 1 | HC_vs_MS.NoTrt_F |
| PLEKHG3    | 0.23179 | -0.5011 | 0.5   | 0.53 | 1 | HC_vs_MS.NoTrt_F |
| IBA57      | 0.23183 | 1.13087 | 0.829 | 0.86 | 1 | HC_vs_MS.NoTrt_F |
| HSBP1      | 0.23193 | 0.42828 | 0.639 | 0.7  | 1 | HC_vs_MS.NoTrt_F |
| NARS2      | 0.232   | -0.8835 | 0.448 | 0.49 | 1 | HC_vs_MS.NoTrt_F |
| TBC1D12    | 0.23239 | 0.28895 | 0.445 | 0.4  | 1 | HC_vs_MS.NoTrt_F |
| EDA        | 0.23276 | -0.7599 | 0.428 | 0.48 | 1 | HC_vs_MS.NoTrt_F |
| DHX35      | 0.2328  | -0.4675 | 0.422 | 0.45 | 1 | HC_vs_MS.NoTrt_F |
| FUT3       | 0.23282 | -0.4461 | 0.228 | 0.27 | 1 | HC_vs_MS.NoTrt_F |
| ZNF550     | 0.23339 | -0.2822 | 0.344 | 0.38 | 1 | HC_vs_MS.NoTrt_F |
| ASCC3      | 0.23391 | 0.38453 | 0.338 | 0.41 | 1 | HC_vs_MS.NoTrt_F |
| SLC43A1    | 0.23395 | 0.26698 | 0.156 | 0.2  | 1 | HC_vs_MS.NoTrt_F |
| RNF135     | 0.23444 | 0.81668 | 0.309 | 0.37 | 1 | HC_vs_MS.NoTrt_F |
| ZNF543     | 0.2347  | 0.93005 | 0.607 | 0.69 | 1 | HC_vs_MS.NoTrt_F |
| PPP4R3A    | 0.23484 | 0.2534  | 0.306 | 0.37 | 1 | HC_vs_MS.NoTrt_F |
| RTN2       | 0.23493 | 0.53879 | 0.309 | 0.26 | 1 | HC_vs_MS.NoTrt_F |
| METAP2     | 0.23495 | -0.2864 | 0.477 | 0.55 | 1 | HC_vs_MS.NoTrt_F |
| CKS1B      | 0.23517 | 0.50499 | 0.272 | 0.32 | 1 | HC_vs_MS.NoTrt_F |
| INTS2      | 0.23518 | -0.2585 | 0.298 | 0.34 | 1 | HC_vs_MS.NoTrt_F |

|          |         |         |       |      |   |                  |
|----------|---------|---------|-------|------|---|------------------|
| ACSBG1   | 0.23525 | 0.42693 | 0.428 | 0.5  | 1 | HC_vs_MS.NoTrt_F |
| IL17RE   | 0.23525 | 0.66991 | 0.373 | 0.33 | 1 | HC_vs_MS.NoTrt_F |
| EPHB1    | 0.2354  | 1.29058 | 0.087 | 0.12 | 1 | HC_vs_MS.NoTrt_F |
| INTS4    | 0.2358  | -0.344  | 0.413 | 0.44 | 1 | HC_vs_MS.NoTrt_F |
| ZNF257   | 0.23586 | 0.40664 | 0.569 | 0.51 | 1 | HC_vs_MS.NoTrt_F |
| PSMD11   | 0.2359  | 0.25364 | 0.558 | 0.59 | 1 | HC_vs_MS.NoTrt_F |
| RINL     | 0.23591 | -0.3286 | 0.763 | 0.77 | 1 | HC_vs_MS.NoTrt_F |
| ALOX12   | 0.23609 | 0.49118 | 0.104 | 0.14 | 1 | HC_vs_MS.NoTrt_F |
| MRPL43   | 0.23624 | 0.60541 | 0.185 | 0.24 | 1 | HC_vs_MS.NoTrt_F |
| CD276    | 0.23671 | 0.50975 | 0.512 | 0.46 | 1 | HC_vs_MS.NoTrt_F |
| GSTO2    | 0.23711 | 0.48074 | 0.896 | 0.92 | 1 | HC_vs_MS.NoTrt_F |
| RTF1     | 0.23716 | -0.4042 | 0.645 | 0.66 | 1 | HC_vs_MS.NoTrt_F |
| FNIP1    | 0.2373  | 0.39186 | 0.587 | 0.67 | 1 | HC_vs_MS.NoTrt_F |
| ASB6     | 0.23739 | -0.548  | 0.691 | 0.69 | 1 | HC_vs_MS.NoTrt_F |
| COMTD1   | 0.2375  | 0.34919 | 0.173 | 0.21 | 1 | HC_vs_MS.NoTrt_F |
| HEG1     | 0.23763 | 1.20094 | 0.182 | 0.14 | 1 | HC_vs_MS.NoTrt_F |
| FAM149A  | 0.23794 | 0.79212 | 0.379 | 0.42 | 1 | HC_vs_MS.NoTrt_F |
| KHDRBS1  | 0.23795 | 0.67566 | 0.24  | 0.3  | 1 | HC_vs_MS.NoTrt_F |
| DENND6B  | 0.23796 | 0.79169 | 0.399 | 0.34 | 1 | HC_vs_MS.NoTrt_F |
| HLA-DRB3 | 0.23811 | 0.3068  | 0.188 | 0.24 | 1 | HC_vs_MS.NoTrt_F |
| MIER2    | 0.23822 | 0.29037 | 0.509 | 0.54 | 1 | HC_vs_MS.NoTrt_F |
| IKBKB    | 0.23843 | -0.3018 | 0.864 | 0.9  | 1 | HC_vs_MS.NoTrt_F |
| SLC20A2  | 0.23849 | 0.72875 | 0.179 | 0.23 | 1 | HC_vs_MS.NoTrt_F |
| B3GALT4  | 0.2385  | -0.8615 | 0.165 | 0.2  | 1 | HC_vs_MS.NoTrt_F |
| ABCA2    | 0.23851 | 0.55221 | 0.341 | 0.39 | 1 | HC_vs_MS.NoTrt_F |
| C3orf18  | 0.23855 | 0.72049 | 0.315 | 0.35 | 1 | HC_vs_MS.NoTrt_F |
| CCSAP    | 0.23874 | 0.77752 | 0.188 | 0.24 | 1 | HC_vs_MS.NoTrt_F |
| MRPS12   | 0.23908 | -0.3358 | 0.436 | 0.48 | 1 | HC_vs_MS.NoTrt_F |
| KMT5B    | 0.23919 | 0.45128 | 0.353 | 0.4  | 1 | HC_vs_MS.NoTrt_F |
| ABCC4    | 0.23932 | 0.39709 | 0.789 | 0.81 | 1 | HC_vs_MS.NoTrt_F |
| WHAMM    | 0.23934 | 0.25916 | 0.873 | 0.87 | 1 | HC_vs_MS.NoTrt_F |
| CUL1     | 0.23997 | 0.87741 | 0.237 | 0.3  | 1 | HC_vs_MS.NoTrt_F |
| LST1     | 0.24018 | 0.88307 | 0.272 | 0.33 | 1 | HC_vs_MS.NoTrt_F |
| KIAA0141 | 0.24059 | 0.50347 | 0.249 | 0.3  | 1 | HC_vs_MS.NoTrt_F |
| C16orf87 | 0.24133 | -0.2752 | 0.812 | 0.85 | 1 | HC_vs_MS.NoTrt_F |
| DHX15    | 0.24144 | 0.59194 | 0.54  | 0.59 | 1 | HC_vs_MS.NoTrt_F |
| SCARB2   | 0.2416  | 0.25736 | 0.341 | 0.4  | 1 | HC_vs_MS.NoTrt_F |
| PACS1    | 0.2416  | 0.5502  | 0.853 | 0.85 | 1 | HC_vs_MS.NoTrt_F |
| LRPAP1   | 0.24165 | -0.2994 | 0.887 | 0.9  | 1 | HC_vs_MS.NoTrt_F |
| HLA-F    | 0.24169 | 0.50132 | 0.592 | 0.67 | 1 | HC_vs_MS.NoTrt_F |

|          |         |         |       |      |   |                  |
|----------|---------|---------|-------|------|---|------------------|
| CTSL     | 0.24204 | 0.44096 | 0.078 | 0.11 | 1 | HC_vs_MS.NoTrt_F |
| NMT1     | 0.24225 | -0.4643 | 0.367 | 0.42 | 1 | HC_vs_MS.NoTrt_F |
| PPP5C    | 0.24233 | 0.65895 | 0.558 | 0.51 | 1 | HC_vs_MS.NoTrt_F |
| GTF3C3   | 0.2424  | 0.4539  | 0.699 | 0.72 | 1 | HC_vs_MS.NoTrt_F |
| APOBR    | 0.24254 | 0.39827 | 0.176 | 0.23 | 1 | HC_vs_MS.NoTrt_F |
| BAZ2A    | 0.24311 | 1.0718  | 0.731 | 0.71 | 1 | HC_vs_MS.NoTrt_F |
| H2AFJ    | 0.24312 | 0.79874 | 0.15  | 0.19 | 1 | HC_vs_MS.NoTrt_F |
| GPATCH11 | 0.24315 | -0.361  | 0.535 | 0.59 | 1 | HC_vs_MS.NoTrt_F |
| FDXACB1  | 0.2432  | -0.3418 | 0.445 | 0.51 | 1 | HC_vs_MS.NoTrt_F |
| C21orf33 | 0.24327 | 0.30873 | 0.416 | 0.46 | 1 | HC_vs_MS.NoTrt_F |
| ORAI1    | 0.24328 | 0.5456  | 0.121 | 0.16 | 1 | HC_vs_MS.NoTrt_F |
| IDNK     | 0.24341 | -0.8123 | 0.454 | 0.48 | 1 | HC_vs_MS.NoTrt_F |
| ARL16    | 0.24349 | -0.4002 | 0.783 | 0.8  | 1 | HC_vs_MS.NoTrt_F |
| PNN      | 0.24351 | 0.36572 | 0.301 | 0.37 | 1 | HC_vs_MS.NoTrt_F |
| MEX3C    | 0.24362 | 0.61176 | 0.124 | 0.17 | 1 | HC_vs_MS.NoTrt_F |
| ZNF350   | 0.24374 | -1.1764 | 0.595 | 0.62 | 1 | HC_vs_MS.NoTrt_F |
| RRP8     | 0.24376 | 0.27865 | 0.529 | 0.45 | 1 | HC_vs_MS.NoTrt_F |
| SPTLC3   | 0.2439  | 0.53811 | 0.575 | 0.56 | 1 | HC_vs_MS.NoTrt_F |
| LILRB3   | 0.24397 | -0.682  | 0.162 | 0.2  | 1 | HC_vs_MS.NoTrt_F |
| APBB3    | 0.24398 | 0.71772 | 0.202 | 0.25 | 1 | HC_vs_MS.NoTrt_F |
| TEKT3    | 0.24398 | 0.26289 | 0.179 | 0.23 | 1 | HC_vs_MS.NoTrt_F |
| CPA4     | 0.24415 | 0.25529 | 0.584 | 0.51 | 1 | HC_vs_MS.NoTrt_F |
| PSMD14   | 0.24418 | 0.26674 | 0.179 | 0.23 | 1 | HC_vs_MS.NoTrt_F |
| CXCR2    | 0.24464 | 0.72785 | 0.341 | 0.38 | 1 | HC_vs_MS.NoTrt_F |
| IMMT     | 0.24465 | -0.5423 | 0.486 | 0.54 | 1 | HC_vs_MS.NoTrt_F |
| MICAL2   | 0.24471 | 0.86781 | 0.89  | 0.86 | 1 | HC_vs_MS.NoTrt_F |
| SLC39A5  | 0.24474 | 0.68921 | 0.24  | 0.29 | 1 | HC_vs_MS.NoTrt_F |
| NHP2     | 0.24475 | 0.33153 | 0.266 | 0.31 | 1 | HC_vs_MS.NoTrt_F |
| SHROOM3  | 0.2448  | 0.25242 | 0.327 | 0.29 | 1 | HC_vs_MS.NoTrt_F |
| EPPK1    | 0.24491 | 1.41059 | 0.101 | 0.14 | 1 | HC_vs_MS.NoTrt_F |
| SETD1A   | 0.24503 | 2.19993 | 0.168 | 0.13 | 1 | HC_vs_MS.NoTrt_F |
| ORC1     | 0.24503 | 0.90074 | 0.303 | 0.27 | 1 | HC_vs_MS.NoTrt_F |
| AP1S3    | 0.24583 | 0.27535 | 0.951 | 0.95 | 1 | HC_vs_MS.NoTrt_F |
| GDPGP1   | 0.24593 | 0.27711 | 0.948 | 0.96 | 1 | HC_vs_MS.NoTrt_F |
| CDH26    | 0.24618 | 0.74118 | 0.173 | 0.22 | 1 | HC_vs_MS.NoTrt_F |
| UTP6     | 0.24622 | -0.2796 | 0.899 | 0.91 | 1 | HC_vs_MS.NoTrt_F |
| DUS3L    | 0.24653 | 0.59642 | 0.188 | 0.24 | 1 | HC_vs_MS.NoTrt_F |
| PBRM1    | 0.24662 | 0.40505 | 0.725 | 0.79 | 1 | HC_vs_MS.NoTrt_F |
| DTD1     | 0.24689 | -0.7973 | 0.382 | 0.4  | 1 | HC_vs_MS.NoTrt_F |
| ATP13A3  | 0.24699 | 0.51615 | 0.173 | 0.22 | 1 | HC_vs_MS.NoTrt_F |

|             |         |         |       |      |   |                  |
|-------------|---------|---------|-------|------|---|------------------|
| APAF1       | 0.24702 | -0.6323 | 0.676 | 0.68 | 1 | HC_vs_MS.NoTrt_F |
| AXL         | 0.24749 | -0.4122 | 0.772 | 0.79 | 1 | HC_vs_MS.NoTrt_F |
| CAPN7       | 0.24752 | -0.2645 | 0.624 | 0.63 | 1 | HC_vs_MS.NoTrt_F |
| S100A4      | 0.24816 | 0.38442 | 0.757 | 0.9  | 1 | HC_vs_MS.NoTrt_F |
| WNK1        | 0.24831 | 0.26378 | 0.613 | 0.72 | 1 | HC_vs_MS.NoTrt_F |
| ALO22397.1  | 0.24853 | 0.29001 | 0.292 | 0.37 | 1 | HC_vs_MS.NoTrt_F |
| SOCS1       | 0.24855 | 0.54519 | 0.139 | 0.19 | 1 | HC_vs_MS.NoTrt_F |
| UBE2V2      | 0.24895 | -0.3987 | 0.734 | 0.77 | 1 | HC_vs_MS.NoTrt_F |
| NEK1        | 0.24896 | 0.35321 | 0.402 | 0.45 | 1 | HC_vs_MS.NoTrt_F |
| OPN3        | 0.24899 | -0.7347 | 0.263 | 0.3  | 1 | HC_vs_MS.NoTrt_F |
| SLC8A1      | 0.24924 | 0.80699 | 0.347 | 0.29 | 1 | HC_vs_MS.NoTrt_F |
| RAI1        | 0.24929 | 0.55287 | 0.234 | 0.29 | 1 | HC_vs_MS.NoTrt_F |
| AVPR1A      | 0.24953 | 0.6625  | 0.246 | 0.2  | 1 | HC_vs_MS.NoTrt_F |
| BCAP29      | 0.24955 | -0.6533 | 0.41  | 0.48 | 1 | HC_vs_MS.NoTrt_F |
| WASL        | 0.24967 | 0.37386 | 0.136 | 0.18 | 1 | HC_vs_MS.NoTrt_F |
| KAT2B       | 0.25104 | 0.44893 | 0.315 | 0.39 | 1 | HC_vs_MS.NoTrt_F |
| JAZF1       | 0.25133 | 0.93519 | 0.194 | 0.24 | 1 | HC_vs_MS.NoTrt_F |
| TBC1D22A    | 0.25167 | 0.26027 | 0.572 | 0.62 | 1 | HC_vs_MS.NoTrt_F |
| ATP7B       | 0.25204 | 1.29209 | 0.197 | 0.24 | 1 | HC_vs_MS.NoTrt_F |
| PGM2L1      | 0.2522  | -0.3242 | 0.546 | 0.6  | 1 | HC_vs_MS.NoTrt_F |
| IL13RA1     | 0.25238 | 0.29033 | 0.329 | 0.39 | 1 | HC_vs_MS.NoTrt_F |
| LAMP3       | 0.25276 | 0.48435 | 0.494 | 0.55 | 1 | HC_vs_MS.NoTrt_F |
| MADD        | 0.25325 | 0.48952 | 0.283 | 0.35 | 1 | HC_vs_MS.NoTrt_F |
| TUFT1       | 0.25341 | -0.6534 | 0.396 | 0.44 | 1 | HC_vs_MS.NoTrt_F |
| WNK3        | 0.25352 | -0.3297 | 0.405 | 0.34 | 1 | HC_vs_MS.NoTrt_F |
| MYH3        | 0.25398 | 0.59154 | 0.699 | 0.68 | 1 | HC_vs_MS.NoTrt_F |
| FAHD2A      | 0.2543  | 0.6988  | 0.199 | 0.24 | 1 | HC_vs_MS.NoTrt_F |
| KDELC2      | 0.25466 | -0.5018 | 0.65  | 0.58 | 1 | HC_vs_MS.NoTrt_F |
| ARL10       | 0.25505 | -0.2502 | 0.922 | 0.85 | 1 | HC_vs_MS.NoTrt_F |
| C9orf131    | 0.25511 | -0.3026 | 0.182 | 0.22 | 1 | HC_vs_MS.NoTrt_F |
| HRH2        | 0.25547 | -0.4567 | 0.136 | 0.17 | 1 | HC_vs_MS.NoTrt_F |
| MXD4        | 0.25601 | 0.49601 | 0.254 | 0.3  | 1 | HC_vs_MS.NoTrt_F |
| MCEE        | 0.25631 | 0.5413  | 0.214 | 0.26 | 1 | HC_vs_MS.NoTrt_F |
| GNA15       | 0.25665 | 0.75544 | 0.081 | 0.12 | 1 | HC_vs_MS.NoTrt_F |
| GPNMB       | 0.25676 | 0.26146 | 0.734 | 0.69 | 1 | HC_vs_MS.NoTrt_F |
| MSRB1       | 0.25689 | -0.3596 | 0.13  | 0.17 | 1 | HC_vs_MS.NoTrt_F |
| HIST4H4     | 0.25701 | -0.3102 | 0.561 | 0.61 | 1 | HC_vs_MS.NoTrt_F |
| C15orf38-AF | 0.25733 | -0.8334 | 0.402 | 0.43 | 1 | HC_vs_MS.NoTrt_F |
| PPIL2       | 0.25747 | 0.58115 | 0.454 | 0.49 | 1 | HC_vs_MS.NoTrt_F |
| C14orf1     | 0.25792 | -0.3023 | 0.306 | 0.34 | 1 | HC_vs_MS.NoTrt_F |

|            |         |         |       |      |   |                  |
|------------|---------|---------|-------|------|---|------------------|
| NCOA6      | 0.25799 | 0.39718 | 0.728 | 0.81 | 1 | HC_vs_MS.NoTrt_F |
| TMEM168    | 0.2581  | 0.49513 | 0.592 | 0.51 | 1 | HC_vs_MS.NoTrt_F |
| TMEM65     | 0.25825 | 0.34481 | 0.777 | 0.7  | 1 | HC_vs_MS.NoTrt_F |
| NSMCE4A    | 0.25844 | 0.36918 | 0.379 | 0.42 | 1 | HC_vs_MS.NoTrt_F |
| TMED8      | 0.25896 | 0.58234 | 0.642 | 0.66 | 1 | HC_vs_MS.NoTrt_F |
| CDC42BPG   | 0.25915 | 0.80987 | 0.616 | 0.56 | 1 | HC_vs_MS.NoTrt_F |
| BRCA2      | 0.25958 | -0.298  | 0.393 | 0.43 | 1 | HC_vs_MS.NoTrt_F |
| LGALS1     | 0.25974 | 0.6353  | 0.477 | 0.47 | 1 | HC_vs_MS.NoTrt_F |
| ERCC3      | 0.26013 | -0.2991 | 0.434 | 0.48 | 1 | HC_vs_MS.NoTrt_F |
| ARFGAP2    | 0.26043 | -0.2671 | 0.566 | 0.64 | 1 | HC_vs_MS.NoTrt_F |
| RGPD3      | 0.26066 | 0.38005 | 0.104 | 0.14 | 1 | HC_vs_MS.NoTrt_F |
| LCLAT1     | 0.26078 | 0.36263 | 0.835 | 0.85 | 1 | HC_vs_MS.NoTrt_F |
| WISP2      | 0.26105 | 0.5245  | 0.685 | 0.61 | 1 | HC_vs_MS.NoTrt_F |
| LRRC8A     | 0.26125 | -0.354  | 0.173 | 0.21 | 1 | HC_vs_MS.NoTrt_F |
| STT3B      | 0.26148 | 0.77545 | 0.618 | 0.58 | 1 | HC_vs_MS.NoTrt_F |
| TMEM91     | 0.26168 | 0.58631 | 0.598 | 0.56 | 1 | HC_vs_MS.NoTrt_F |
| LILRB5     | 0.26177 | 0.4804  | 0.379 | 0.43 | 1 | HC_vs_MS.NoTrt_F |
| DOPEY1     | 0.26186 | 0.6304  | 0.327 | 0.38 | 1 | HC_vs_MS.NoTrt_F |
| ALDH1B1    | 0.26186 | -0.3113 | 0.662 | 0.67 | 1 | HC_vs_MS.NoTrt_F |
| ZSWIM1     | 0.26208 | 0.74562 | 0.734 | 0.72 | 1 | HC_vs_MS.NoTrt_F |
| ITSN1      | 0.26224 | 0.50119 | 0.936 | 0.92 | 1 | HC_vs_MS.NoTrt_F |
| FMNL3      | 0.26228 | 0.52341 | 0.431 | 0.39 | 1 | HC_vs_MS.NoTrt_F |
| GPM6B      | 0.26277 | 0.35059 | 0.171 | 0.21 | 1 | HC_vs_MS.NoTrt_F |
| TXNL4A     | 0.26297 | 0.55041 | 0.572 | 0.53 | 1 | HC_vs_MS.NoTrt_F |
| MOBP       | 0.26304 | 0.25387 | 0.656 | 0.6  | 1 | HC_vs_MS.NoTrt_F |
| KIF3A      | 0.26382 | 0.33914 | 0.786 | 0.72 | 1 | HC_vs_MS.NoTrt_F |
| GOSR2      | 0.26385 | 1.10779 | 0.171 | 0.22 | 1 | HC_vs_MS.NoTrt_F |
| RBP7       | 0.26395 | 1.12912 | 0.376 | 0.32 | 1 | HC_vs_MS.NoTrt_F |
| LHFP       | 0.26396 | 1.05346 | 0.26  | 0.23 | 1 | HC_vs_MS.NoTrt_F |
| PLEKHA5    | 0.26432 | -0.4276 | 0.945 | 0.95 | 1 | HC_vs_MS.NoTrt_F |
| GNB1L      | 0.26447 | 0.42971 | 0.292 | 0.33 | 1 | HC_vs_MS.NoTrt_F |
| HINT3      | 0.26453 | -0.6104 | 0.303 | 0.35 | 1 | HC_vs_MS.NoTrt_F |
| AL928654.7 | 0.26455 | 0.40825 | 0.078 | 0.11 | 1 | HC_vs_MS.NoTrt_F |
| IL3RA      | 0.26468 | 1.41453 | 0.121 | 0.16 | 1 | HC_vs_MS.NoTrt_F |
| PNISR      | 0.26473 | 0.34326 | 0.555 | 0.67 | 1 | HC_vs_MS.NoTrt_F |
| BRAF       | 0.26476 | 0.70995 | 0.191 | 0.24 | 1 | HC_vs_MS.NoTrt_F |
| NDC80      | 0.26481 | -0.5356 | 0.743 | 0.77 | 1 | HC_vs_MS.NoTrt_F |
| PCTP       | 0.26483 | 0.40693 | 0.442 | 0.49 | 1 | HC_vs_MS.NoTrt_F |
| RP11-1035H | 0.26486 | 0.43367 | 0.153 | 0.19 | 1 | HC_vs_MS.NoTrt_F |
| RMND5B     | 0.26489 | 0.58824 | 0.682 | 0.64 | 1 | HC_vs_MS.NoTrt_F |

|          |         |         |       |      |   |                  |
|----------|---------|---------|-------|------|---|------------------|
| KCTD20   | 0.26504 | 0.4584  | 0.685 | 0.72 | 1 | HC_vs_MS.NoTrt_F |
| EBPL     | 0.26508 | 0.32828 | 0.717 | 0.71 | 1 | HC_vs_MS.NoTrt_F |
| ZNF609   | 0.26511 | -0.6406 | 0.621 | 0.66 | 1 | HC_vs_MS.NoTrt_F |
| TCTA     | 0.26526 | 0.68343 | 0.633 | 0.64 | 1 | HC_vs_MS.NoTrt_F |
| ZNF331   | 0.26534 | 0.56077 | 0.757 | 0.78 | 1 | HC_vs_MS.NoTrt_F |
| KLHL24   | 0.26535 | -0.4769 | 0.882 | 0.88 | 1 | HC_vs_MS.NoTrt_F |
| MBOAT7   | 0.2654  | 0.74676 | 0.139 | 0.18 | 1 | HC_vs_MS.NoTrt_F |
| INPP5K   | 0.26544 | -0.2765 | 0.621 | 0.69 | 1 | HC_vs_MS.NoTrt_F |
| FASTKD5  | 0.26607 | -0.312  | 0.159 | 0.2  | 1 | HC_vs_MS.NoTrt_F |
| EMC10    | 0.26629 | -0.2518 | 0.864 | 0.87 | 1 | HC_vs_MS.NoTrt_F |
| TMEM216  | 0.26638 | -0.4521 | 0.471 | 0.52 | 1 | HC_vs_MS.NoTrt_F |
| AGPAT5   | 0.26694 | 0.59298 | 0.127 | 0.17 | 1 | HC_vs_MS.NoTrt_F |
| DEPDC5   | 0.26718 | -0.4779 | 0.777 | 0.81 | 1 | HC_vs_MS.NoTrt_F |
| SLC16A3  | 0.26724 | 0.77779 | 0.595 | 0.55 | 1 | HC_vs_MS.NoTrt_F |
| NKPD1    | 0.26724 | 0.3368  | 0.098 | 0.13 | 1 | HC_vs_MS.NoTrt_F |
| MGST3    | 0.26748 | -0.3185 | 0.902 | 0.89 | 1 | HC_vs_MS.NoTrt_F |
| CXADR    | 0.26768 | -0.8831 | 0.289 | 0.34 | 1 | HC_vs_MS.NoTrt_F |
| ANKRD44  | 0.26836 | 0.29825 | 0.864 | 0.91 | 1 | HC_vs_MS.NoTrt_F |
| SEC14L4  | 0.26845 | 0.61124 | 0.613 | 0.56 | 1 | HC_vs_MS.NoTrt_F |
| QSOX2    | 0.26865 | 0.39878 | 0.194 | 0.24 | 1 | HC_vs_MS.NoTrt_F |
| CAMK1D   | 0.26866 | -0.2841 | 0.855 | 0.84 | 1 | HC_vs_MS.NoTrt_F |
| ZNF655   | 0.26869 | 0.2652  | 0.616 | 0.69 | 1 | HC_vs_MS.NoTrt_F |
| SLC38A6  | 0.26919 | 0.50998 | 0.671 | 0.67 | 1 | HC_vs_MS.NoTrt_F |
| HYKK     | 0.26929 | 0.54815 | 0.89  | 0.89 | 1 | HC_vs_MS.NoTrt_F |
| SLC9A6   | 0.26948 | -0.3949 | 0.462 | 0.54 | 1 | HC_vs_MS.NoTrt_F |
| ZNF782   | 0.26974 | 1.3323  | 0.147 | 0.19 | 1 | HC_vs_MS.NoTrt_F |
| NUDT9    | 0.26976 | -0.2879 | 0.662 | 0.59 | 1 | HC_vs_MS.NoTrt_F |
| C6orf25  | 0.26989 | 0.55523 | 0.506 | 0.55 | 1 | HC_vs_MS.NoTrt_F |
| SCG3     | 0.26991 | 0.28182 | 0.26  | 0.32 | 1 | HC_vs_MS.NoTrt_F |
| CCDC169  | 0.27013 | 0.44108 | 0.636 | 0.61 | 1 | HC_vs_MS.NoTrt_F |
| SNRNP27  | 0.2704  | 0.59114 | 0.277 | 0.34 | 1 | HC_vs_MS.NoTrt_F |
| FEM1B    | 0.27042 | 0.28392 | 0.124 | 0.16 | 1 | HC_vs_MS.NoTrt_F |
| GSTT1    | 0.27053 | 0.33504 | 0.74  | 0.81 | 1 | HC_vs_MS.NoTrt_F |
| CLCN3    | 0.2709  | -0.3755 | 0.399 | 0.44 | 1 | HC_vs_MS.NoTrt_F |
| NOCT     | 0.27104 | 0.40008 | 0.728 | 0.71 | 1 | HC_vs_MS.NoTrt_F |
| C15orf52 | 0.27115 | 0.51038 | 0.425 | 0.48 | 1 | HC_vs_MS.NoTrt_F |
| JARID2   | 0.27131 | -0.6591 | 0.26  | 0.3  | 1 | HC_vs_MS.NoTrt_F |
| MAP1LC3A | 0.27131 | 0.41637 | 0.098 | 0.13 | 1 | HC_vs_MS.NoTrt_F |
| SASH1    | 0.27161 | 1.0606  | 0.399 | 0.34 | 1 | HC_vs_MS.NoTrt_F |
| RPP38    | 0.27165 | -0.7318 | 0.465 | 0.5  | 1 | HC_vs_MS.NoTrt_F |

|            |         |         |       |      |   |                  |
|------------|---------|---------|-------|------|---|------------------|
| SERPINB1   | 0.27173 | -0.2585 | 0.723 | 0.72 | 1 | HC_vs_MS.NoTrt_F |
| FCRL2      | 0.27177 | 0.73155 | 0.723 | 0.67 | 1 | HC_vs_MS.NoTrt_F |
| ZNF652     | 0.27207 | -0.5635 | 0.581 | 0.61 | 1 | HC_vs_MS.NoTrt_F |
| NUP43      | 0.2722  | 0.31327 | 0.905 | 0.85 | 1 | HC_vs_MS.NoTrt_F |
| 3-Sep      | 0.27222 | 0.7253  | 0.075 | 0.11 | 1 | HC_vs_MS.NoTrt_F |
| PDCD7      | 0.27242 | 0.57006 | 0.549 | 0.48 | 1 | HC_vs_MS.NoTrt_F |
| ATG13      | 0.27278 | 0.3831  | 0.89  | 0.84 | 1 | HC_vs_MS.NoTrt_F |
| CLVS1      | 0.27334 | 0.25302 | 0.685 | 0.66 | 1 | HC_vs_MS.NoTrt_F |
| KIAA0930   | 0.27374 | 0.83863 | 0.691 | 0.64 | 1 | HC_vs_MS.NoTrt_F |
| ETFDH      | 0.27385 | 0.34352 | 0.74  | 0.74 | 1 | HC_vs_MS.NoTrt_F |
| RALGPS2    | 0.27407 | 0.48624 | 0.37  | 0.41 | 1 | HC_vs_MS.NoTrt_F |
| USF1       | 0.27436 | -1.2134 | 0.223 | 0.25 | 1 | HC_vs_MS.NoTrt_F |
| PRDX5      | 0.27457 | 0.55105 | 0.286 | 0.36 | 1 | HC_vs_MS.NoTrt_F |
| NPIPA7     | 0.27495 | 0.31091 | 0.182 | 0.23 | 1 | HC_vs_MS.NoTrt_F |
| IMPDH2     | 0.27574 | 0.27642 | 0.225 | 0.28 | 1 | HC_vs_MS.NoTrt_F |
| SLC2A5     | 0.2758  | 0.28644 | 0.74  | 0.72 | 1 | HC_vs_MS.NoTrt_F |
| VAV1       | 0.27673 | 0.29807 | 0.876 | 0.91 | 1 | HC_vs_MS.NoTrt_F |
| CST3       | 0.27683 | 1.55964 | 0.153 | 0.12 | 1 | HC_vs_MS.NoTrt_F |
| DLEC1      | 0.2772  | 0.49126 | 0.514 | 0.54 | 1 | HC_vs_MS.NoTrt_F |
| STPG1      | 0.27759 | -0.2772 | 0.801 | 0.81 | 1 | HC_vs_MS.NoTrt_F |
| KIAA1109   | 0.27786 | -0.2576 | 0.373 | 0.43 | 1 | HC_vs_MS.NoTrt_F |
| COPA       | 0.2779  | -0.3065 | 0.35  | 0.39 | 1 | HC_vs_MS.NoTrt_F |
| ZNF316     | 0.27835 | -1.1066 | 0.627 | 0.53 | 1 | HC_vs_MS.NoTrt_F |
| SLC9A8     | 0.2784  | 0.31839 | 0.26  | 0.31 | 1 | HC_vs_MS.NoTrt_F |
| VWA2       | 0.27846 | -0.3834 | 0.78  | 0.79 | 1 | HC_vs_MS.NoTrt_F |
| CES3       | 0.27864 | 0.25938 | 0.327 | 0.39 | 1 | HC_vs_MS.NoTrt_F |
| SERPINB10  | 0.27886 | 0.27319 | 0.448 | 0.43 | 1 | HC_vs_MS.NoTrt_F |
| MAN1C1     | 0.27897 | 0.45242 | 0.905 | 0.85 | 1 | HC_vs_MS.NoTrt_F |
| F11R       | 0.27913 | 0.80696 | 0.691 | 0.66 | 1 | HC_vs_MS.NoTrt_F |
| C17orf105  | 0.27934 | 0.2549  | 0.74  | 0.73 | 1 | HC_vs_MS.NoTrt_F |
| NDST2      | 0.27945 | 1.1322  | 0.124 | 0.16 | 1 | HC_vs_MS.NoTrt_F |
| BSPRY      | 0.27968 | 0.76799 | 0.11  | 0.14 | 1 | HC_vs_MS.NoTrt_F |
| APEX1      | 0.27974 | 0.69125 | 0.211 | 0.26 | 1 | HC_vs_MS.NoTrt_F |
| RINT1      | 0.27995 | -0.4322 | 0.569 | 0.62 | 1 | HC_vs_MS.NoTrt_F |
| MRPS26     | 0.28007 | 0.44271 | 0.194 | 0.23 | 1 | HC_vs_MS.NoTrt_F |
| ATG2B      | 0.28018 | 0.35579 | 0.39  | 0.43 | 1 | HC_vs_MS.NoTrt_F |
| HLA-DPA1   | 0.28032 | 0.28484 | 0.309 | 0.36 | 1 | HC_vs_MS.NoTrt_F |
| COLEC11    | 0.28046 | 0.26738 | 0.393 | 0.45 | 1 | HC_vs_MS.NoTrt_F |
| GTF2H2C.2  | 0.28065 | 0.60047 | 0.289 | 0.34 | 1 | HC_vs_MS.NoTrt_F |
| RP11-644F5 | 0.28139 | -0.358  | 0.731 | 0.67 | 1 | HC_vs_MS.NoTrt_F |

|          |         |         |       |      |   |                  |
|----------|---------|---------|-------|------|---|------------------|
| ZKSCAN8  | 0.28142 | 1.42268 | 0.303 | 0.38 | 1 | HC_vs_MS.NoTrt_F |
| KCMF1    | 0.28165 | 0.56442 | 0.54  | 0.55 | 1 | HC_vs_MS.NoTrt_F |
| CLK3     | 0.28194 | -0.2998 | 0.818 | 0.83 | 1 | HC_vs_MS.NoTrt_F |
| BCL2L1   | 0.28206 | 0.7242  | 0.318 | 0.28 | 1 | HC_vs_MS.NoTrt_F |
| SMAD4    | 0.28209 | 0.28521 | 0.512 | 0.53 | 1 | HC_vs_MS.NoTrt_F |
| DCLK1    | 0.28244 | 0.89555 | 0.361 | 0.4  | 1 | HC_vs_MS.NoTrt_F |
| KIAA0040 | 0.28247 | 0.49238 | 0.211 | 0.26 | 1 | HC_vs_MS.NoTrt_F |
| CSNK1G2  | 0.28247 | -0.2793 | 0.133 | 0.17 | 1 | HC_vs_MS.NoTrt_F |
| NUMA1    | 0.28258 | 0.38051 | 0.893 | 0.87 | 1 | HC_vs_MS.NoTrt_F |
| SREBF2   | 0.28298 | 0.44701 | 0.22  | 0.27 | 1 | HC_vs_MS.NoTrt_F |
| CLK2     | 0.28379 | 1.19946 | 0.202 | 0.17 | 1 | HC_vs_MS.NoTrt_F |
| ADSL     | 0.28389 | -0.3607 | 0.873 | 0.89 | 1 | HC_vs_MS.NoTrt_F |
| CD59     | 0.28394 | -0.5092 | 0.757 | 0.79 | 1 | HC_vs_MS.NoTrt_F |
| AGBL2    | 0.28403 | 0.48753 | 0.28  | 0.32 | 1 | HC_vs_MS.NoTrt_F |
| LSM3     | 0.28442 | 0.40836 | 0.624 | 0.65 | 1 | HC_vs_MS.NoTrt_F |
| CD302    | 0.28462 | 0.26998 | 0.425 | 0.35 | 1 | HC_vs_MS.NoTrt_F |
| TENM1    | 0.28474 | 1.03102 | 0.139 | 0.18 | 1 | HC_vs_MS.NoTrt_F |
| NUDCD2   | 0.28555 | -0.5676 | 0.786 | 0.76 | 1 | HC_vs_MS.NoTrt_F |
| SLAMF7   | 0.28557 | 0.47121 | 0.477 | 0.46 | 1 | HC_vs_MS.NoTrt_F |
| CRTC3    | 0.28564 | 0.25029 | 0.575 | 0.63 | 1 | HC_vs_MS.NoTrt_F |
| RPS6KA3  | 0.28564 | -0.3244 | 0.535 | 0.6  | 1 | HC_vs_MS.NoTrt_F |
| PHF7     | 0.28588 | 1.02849 | 0.523 | 0.49 | 1 | HC_vs_MS.NoTrt_F |
| SOCS7    | 0.28606 | 0.96618 | 0.439 | 0.51 | 1 | HC_vs_MS.NoTrt_F |
| CCNF     | 0.28614 | -0.8946 | 0.503 | 0.53 | 1 | HC_vs_MS.NoTrt_F |
| AKR1B10  | 0.28638 | 0.39841 | 0.488 | 0.51 | 1 | HC_vs_MS.NoTrt_F |
| RPN1     | 0.28647 | 0.39953 | 0.76  | 0.78 | 1 | HC_vs_MS.NoTrt_F |
| NME4     | 0.28654 | 0.2937  | 0.168 | 0.2  | 1 | HC_vs_MS.NoTrt_F |
| YIPF1    | 0.28667 | 1.4102  | 0.124 | 0.16 | 1 | HC_vs_MS.NoTrt_F |
| VPS39    | 0.28702 | -0.5271 | 0.538 | 0.56 | 1 | HC_vs_MS.NoTrt_F |
| ARPC1A   | 0.28727 | 0.49098 | 0.332 | 0.38 | 1 | HC_vs_MS.NoTrt_F |
| STK26    | 0.28745 | 0.6765  | 0.147 | 0.19 | 1 | HC_vs_MS.NoTrt_F |
| GCSAML   | 0.28752 | 0.65158 | 0.338 | 0.39 | 1 | HC_vs_MS.NoTrt_F |
| GTF2E2   | 0.28859 | 0.26542 | 0.639 | 0.7  | 1 | HC_vs_MS.NoTrt_F |
| MTFR1L   | 0.28874 | -0.288  | 0.578 | 0.59 | 1 | HC_vs_MS.NoTrt_F |
| TBC1D19  | 0.28946 | 0.6068  | 0.153 | 0.19 | 1 | HC_vs_MS.NoTrt_F |
| SFXN5    | 0.28951 | 0.41838 | 0.945 | 0.95 | 1 | HC_vs_MS.NoTrt_F |
| ZNF620   | 0.2899  | -0.2559 | 0.754 | 0.81 | 1 | HC_vs_MS.NoTrt_F |
| RRP9     | 0.28994 | 0.94766 | 0.118 | 0.16 | 1 | HC_vs_MS.NoTrt_F |
| DCAF11   | 0.29004 | -0.2611 | 0.847 | 0.85 | 1 | HC_vs_MS.NoTrt_F |
| ACSF2    | 0.29028 | 0.4208  | 0.561 | 0.54 | 1 | HC_vs_MS.NoTrt_F |



|            |         |         |       |      |   |                  |
|------------|---------|---------|-------|------|---|------------------|
| IGHMBP2    | 0.29079 | 0.54424 | 0.402 | 0.43 | 1 | HC_vs_MS.NoTrt_F |
| OSMR       | 0.29121 | 0.75962 | 0.584 | 0.63 | 1 | HC_vs_MS.NoTrt_F |
| APOBEC3C   | 0.29151 | 0.57558 | 0.777 | 0.85 | 1 | HC_vs_MS.NoTrt_F |
| UNC45A     | 0.29181 | 0.2798  | 0.737 | 0.72 | 1 | HC_vs_MS.NoTrt_F |
| TSPYL4     | 0.29181 | 0.83418 | 0.168 | 0.21 | 1 | HC_vs_MS.NoTrt_F |
| EPG5       | 0.2921  | 0.42937 | 0.564 | 0.6  | 1 | HC_vs_MS.NoTrt_F |
| ZNF805     | 0.29214 | 0.8201  | 0.832 | 0.79 | 1 | HC_vs_MS.NoTrt_F |
| WDFY1      | 0.29306 | -0.2994 | 0.39  | 0.43 | 1 | HC_vs_MS.NoTrt_F |
| ZNF781     | 0.29332 | -0.428  | 0.301 | 0.35 | 1 | HC_vs_MS.NoTrt_F |
| PIGW       | 0.29388 | 0.34783 | 0.477 | 0.43 | 1 | HC_vs_MS.NoTrt_F |
| IL18R1     | 0.29404 | 0.40965 | 0.142 | 0.18 | 1 | HC_vs_MS.NoTrt_F |
| TPK1       | 0.29413 | 0.49535 | 0.396 | 0.44 | 1 | HC_vs_MS.NoTrt_F |
| ZKSCAN7    | 0.29458 | 0.34109 | 0.647 | 0.58 | 1 | HC_vs_MS.NoTrt_F |
| CLSPN      | 0.29466 | 0.26871 | 0.91  | 0.91 | 1 | HC_vs_MS.NoTrt_F |
| CTNND1     | 0.29468 | 0.98182 | 0.483 | 0.45 | 1 | HC_vs_MS.NoTrt_F |
| GPR89B     | 0.29483 | 0.32561 | 0.402 | 0.44 | 1 | HC_vs_MS.NoTrt_F |
| OAS1       | 0.29532 | -0.301  | 0.584 | 0.58 | 1 | HC_vs_MS.NoTrt_F |
| LA16c-431H | 0.2956  | 0.72073 | 0.555 | 0.51 | 1 | HC_vs_MS.NoTrt_F |
| CFP        | 0.29617 | 1.14544 | 0.422 | 0.38 | 1 | HC_vs_MS.NoTrt_F |
| CCDC88B    | 0.29641 | 0.71183 | 0.766 | 0.84 | 1 | HC_vs_MS.NoTrt_F |
| CAV2       | 0.29663 | 0.44242 | 0.61  | 0.58 | 1 | HC_vs_MS.NoTrt_F |
| MON2       | 0.29703 | 0.55788 | 0.431 | 0.49 | 1 | HC_vs_MS.NoTrt_F |
| MSI2       | 0.29709 | 0.40352 | 0.942 | 0.91 | 1 | HC_vs_MS.NoTrt_F |
| TP53RK     | 0.29722 | 0.3065  | 0.266 | 0.31 | 1 | HC_vs_MS.NoTrt_F |
| C10orf128  | 0.29726 | -0.2657 | 0.142 | 0.18 | 1 | HC_vs_MS.NoTrt_F |
| OSBP2      | 0.2973  | -0.3826 | 0.468 | 0.52 | 1 | HC_vs_MS.NoTrt_F |
| HIST1H2BE  | 0.29795 | 0.39306 | 0.335 | 0.39 | 1 | HC_vs_MS.NoTrt_F |
| SCAMP3     | 0.29806 | 0.27503 | 0.251 | 0.31 | 1 | HC_vs_MS.NoTrt_F |
| AHR        | 0.29849 | 0.52003 | 0.688 | 0.66 | 1 | HC_vs_MS.NoTrt_F |
| CRACR2A    | 0.29894 | -0.3377 | 0.694 | 0.71 | 1 | HC_vs_MS.NoTrt_F |
| MTHFD2     | 0.29928 | -0.4152 | 0.717 | 0.75 | 1 | HC_vs_MS.NoTrt_F |
| TIMM23B    | 0.2994  | 0.48151 | 0.647 | 0.66 | 1 | HC_vs_MS.NoTrt_F |
| ZNF683     | 0.2995  | 2.07889 | 0.075 | 0.11 | 1 | HC_vs_MS.NoTrt_F |
| ZNF264     | 0.30016 | 0.59955 | 0.957 | 0.95 | 1 | HC_vs_MS.NoTrt_F |
| PAWR       | 0.3004  | 0.45437 | 0.72  | 0.73 | 1 | HC_vs_MS.NoTrt_F |
| OGFOD1     | 0.30043 | -0.5021 | 0.679 | 0.69 | 1 | HC_vs_MS.NoTrt_F |
| RBM12      | 0.30065 | 0.8202  | 0.289 | 0.27 | 1 | HC_vs_MS.NoTrt_F |
| TTC7A      | 0.30104 | 0.70048 | 0.249 | 0.3  | 1 | HC_vs_MS.NoTrt_F |
| ZNRF1      | 0.30121 | 0.83947 | 0.344 | 0.31 | 1 | HC_vs_MS.NoTrt_F |
| FAM175A    | 0.3017  | 0.26033 | 0.867 | 0.88 | 1 | HC_vs_MS.NoTrt_F |

|           |         |         |       |      |   |                  |
|-----------|---------|---------|-------|------|---|------------------|
| GTPBP8    | 0.30201 | -0.4907 | 0.702 | 0.74 | 1 | HC_vs_MS.NoTrt_F |
| GOLGA6L22 | 0.30207 | 0.29119 | 0.434 | 0.41 | 1 | HC_vs_MS.NoTrt_F |
| UQCC3     | 0.30207 | 0.43607 | 0.48  | 0.5  | 1 | HC_vs_MS.NoTrt_F |
| TNFAIP3   | 0.3023  | 0.72698 | 0.633 | 0.65 | 1 | HC_vs_MS.NoTrt_F |
| TMEM182   | 0.30243 | 0.29419 | 0.78  | 0.82 | 1 | HC_vs_MS.NoTrt_F |
| FAM234B   | 0.30248 | -0.5471 | 0.506 | 0.54 | 1 | HC_vs_MS.NoTrt_F |
| TGFB1     | 0.30259 | 0.73198 | 0.393 | 0.45 | 1 | HC_vs_MS.NoTrt_F |
| ACADL     | 0.30263 | -0.3134 | 0.332 | 0.37 | 1 | HC_vs_MS.NoTrt_F |
| SPECC1L   | 0.30266 | 0.25296 | 0.188 | 0.23 | 1 | HC_vs_MS.NoTrt_F |
| SDC4      | 0.30309 | 0.48559 | 0.171 | 0.21 | 1 | HC_vs_MS.NoTrt_F |
| RNF144A   | 0.30342 | 1.76714 | 0.208 | 0.25 | 1 | HC_vs_MS.NoTrt_F |
| ZNF574    | 0.3036  | 0.51558 | 0.373 | 0.39 | 1 | HC_vs_MS.NoTrt_F |
| ANKAR     | 0.3041  | 0.3203  | 0.179 | 0.22 | 1 | HC_vs_MS.NoTrt_F |
| ZNF267    | 0.30419 | 0.62049 | 0.225 | 0.28 | 1 | HC_vs_MS.NoTrt_F |
| IL1R1     | 0.30501 | 1.78254 | 0.422 | 0.39 | 1 | HC_vs_MS.NoTrt_F |
| SMARCA2   | 0.30528 | 0.42186 | 0.477 | 0.55 | 1 | HC_vs_MS.NoTrt_F |
| SCAPER    | 0.30529 | -0.3284 | 0.402 | 0.43 | 1 | HC_vs_MS.NoTrt_F |
| KDM5B     | 0.30533 | 0.89049 | 0.327 | 0.35 | 1 | HC_vs_MS.NoTrt_F |
| ZC3H7B    | 0.30598 | 0.25644 | 0.853 | 0.83 | 1 | HC_vs_MS.NoTrt_F |
| NBPF9     | 0.30635 | 0.55427 | 0.702 | 0.8  | 1 | HC_vs_MS.NoTrt_F |
| MRT04     | 0.30649 | 0.45115 | 0.538 | 0.61 | 1 | HC_vs_MS.NoTrt_F |
| ST20      | 0.30739 | 0.89956 | 0.254 | 0.22 | 1 | HC_vs_MS.NoTrt_F |
| WDR74     | 0.30742 | 0.34196 | 0.653 | 0.62 | 1 | HC_vs_MS.NoTrt_F |
| ARL1      | 0.30747 | -0.5372 | 0.419 | 0.45 | 1 | HC_vs_MS.NoTrt_F |
| TBXA2R    | 0.30758 | 0.4086  | 0.746 | 0.77 | 1 | HC_vs_MS.NoTrt_F |
| CACNB1    | 0.30763 | 0.91025 | 0.145 | 0.18 | 1 | HC_vs_MS.NoTrt_F |
| SMIM8     | 0.30782 | 0.53257 | 0.685 | 0.63 | 1 | HC_vs_MS.NoTrt_F |
| NOTCH1    | 0.30787 | 0.71326 | 0.156 | 0.19 | 1 | HC_vs_MS.NoTrt_F |
| RLIM      | 0.30787 | 0.63317 | 0.772 | 0.8  | 1 | HC_vs_MS.NoTrt_F |
| NAF1      | 0.30828 | 0.62609 | 0.497 | 0.53 | 1 | HC_vs_MS.NoTrt_F |
| PHLDB3    | 0.30845 | 0.46026 | 0.665 | 0.66 | 1 | HC_vs_MS.NoTrt_F |
| MOCS3     | 0.30876 | -0.3731 | 0.879 | 0.88 | 1 | HC_vs_MS.NoTrt_F |
| STX12     | 0.30943 | 0.534   | 0.306 | 0.35 | 1 | HC_vs_MS.NoTrt_F |
| FAM206A   | 0.30946 | 1.32877 | 0.124 | 0.16 | 1 | HC_vs_MS.NoTrt_F |
| ERLEC1    | 0.3096  | 0.51469 | 0.413 | 0.48 | 1 | HC_vs_MS.NoTrt_F |
| NSMCE3    | 0.3097  | -0.3715 | 0.373 | 0.41 | 1 | HC_vs_MS.NoTrt_F |
| ATL2      | 0.30971 | 0.40895 | 0.879 | 0.88 | 1 | HC_vs_MS.NoTrt_F |
| ARHGEF26  | 0.30992 | 1.15981 | 0.595 | 0.53 | 1 | HC_vs_MS.NoTrt_F |
| ZBED5     | 0.31041 | -0.3477 | 0.705 | 0.73 | 1 | HC_vs_MS.NoTrt_F |
| GYG1      | 0.31059 | -0.5674 | 0.618 | 0.64 | 1 | HC_vs_MS.NoTrt_F |

|            |         |         |       |      |   |                  |
|------------|---------|---------|-------|------|---|------------------|
| RAB11FIP1  | 0.31064 | 0.57642 | 0.832 | 0.83 | 1 | HC_vs_MS.NoTrt_F |
| FN3KRP     | 0.31081 | 0.54488 | 0.145 | 0.18 | 1 | HC_vs_MS.NoTrt_F |
| NUP50      | 0.31105 | -0.2889 | 0.734 | 0.75 | 1 | HC_vs_MS.NoTrt_F |
| NEU1       | 0.31123 | 1.14648 | 0.682 | 0.62 | 1 | HC_vs_MS.NoTrt_F |
| FO538757.1 | 0.31152 | 0.41492 | 0.225 | 0.27 | 1 | HC_vs_MS.NoTrt_F |
| CUL7       | 0.312   | 0.91826 | 0.121 | 0.16 | 1 | HC_vs_MS.NoTrt_F |
| ADH4       | 0.31215 | 0.30167 | 0.347 | 0.33 | 1 | HC_vs_MS.NoTrt_F |
| TSKU       | 0.31215 | 0.60482 | 0.587 | 0.6  | 1 | HC_vs_MS.NoTrt_F |
| OGG1       | 0.31251 | -0.2576 | 0.431 | 0.46 | 1 | HC_vs_MS.NoTrt_F |
| RBM34      | 0.31266 | 0.52278 | 0.717 | 0.72 | 1 | HC_vs_MS.NoTrt_F |
| PHRF1      | 0.31285 | 0.72451 | 0.202 | 0.25 | 1 | HC_vs_MS.NoTrt_F |
| SOGA1      | 0.31359 | 0.51049 | 0.711 | 0.65 | 1 | HC_vs_MS.NoTrt_F |
| DDX59      | 0.31371 | 0.32946 | 0.491 | 0.45 | 1 | HC_vs_MS.NoTrt_F |
| CNOT2      | 0.31392 | -0.2801 | 0.936 | 0.96 | 1 | HC_vs_MS.NoTrt_F |
| ERCC2      | 0.31405 | -0.8081 | 0.561 | 0.59 | 1 | HC_vs_MS.NoTrt_F |
| QRSL1      | 0.31446 | 0.29155 | 0.592 | 0.66 | 1 | HC_vs_MS.NoTrt_F |
| STON1      | 0.31503 | -0.7962 | 0.384 | 0.43 | 1 | HC_vs_MS.NoTrt_F |
| SERPINE2   | 0.31623 | -1.1395 | 0.367 | 0.4  | 1 | HC_vs_MS.NoTrt_F |
| NEBL       | 0.3163  | -0.5149 | 0.37  | 0.42 | 1 | HC_vs_MS.NoTrt_F |
| CARF       | 0.31631 | -0.5947 | 0.546 | 0.57 | 1 | HC_vs_MS.NoTrt_F |
| ITFG2      | 0.31633 | 0.32441 | 0.376 | 0.42 | 1 | HC_vs_MS.NoTrt_F |
| GSTO1      | 0.31675 | 0.29604 | 0.217 | 0.26 | 1 | HC_vs_MS.NoTrt_F |
| NUDT6      | 0.31676 | -0.2783 | 0.584 | 0.61 | 1 | HC_vs_MS.NoTrt_F |
| FAM117B    | 0.31681 | 0.27707 | 0.474 | 0.51 | 1 | HC_vs_MS.NoTrt_F |
| KATNAL1    | 0.3169  | 0.30773 | 0.613 | 0.64 | 1 | HC_vs_MS.NoTrt_F |
| PPP1R15A   | 0.31701 | 0.36303 | 0.702 | 0.71 | 1 | HC_vs_MS.NoTrt_F |
| MUTYH      | 0.31726 | -0.2642 | 0.561 | 0.57 | 1 | HC_vs_MS.NoTrt_F |
| WDR3       | 0.31801 | -0.9401 | 0.783 | 0.79 | 1 | HC_vs_MS.NoTrt_F |
| PIGN       | 0.31815 | 0.52949 | 0.653 | 0.64 | 1 | HC_vs_MS.NoTrt_F |
| PPP4R2     | 0.31829 | -0.2516 | 0.523 | 0.56 | 1 | HC_vs_MS.NoTrt_F |
| UBAP1L     | 0.31837 | 0.48259 | 0.399 | 0.45 | 1 | HC_vs_MS.NoTrt_F |
| HSPA14     | 0.31843 | -0.3805 | 0.373 | 0.41 | 1 | HC_vs_MS.NoTrt_F |
| DOCK9      | 0.31852 | 0.8925  | 0.338 | 0.37 | 1 | HC_vs_MS.NoTrt_F |
| LENG1      | 0.31856 | 0.73891 | 0.147 | 0.19 | 1 | HC_vs_MS.NoTrt_F |
| ARHGAP4    | 0.31862 | 0.30778 | 0.497 | 0.6  | 1 | HC_vs_MS.NoTrt_F |
| GGT5       | 0.31867 | 0.3806  | 0.769 | 0.75 | 1 | HC_vs_MS.NoTrt_F |
| A2ML1      | 0.31878 | 0.28105 | 0.685 | 0.71 | 1 | HC_vs_MS.NoTrt_F |
| GOLGA8R    | 0.31898 | 0.54345 | 0.558 | 0.54 | 1 | HC_vs_MS.NoTrt_F |
| RP11-544M1 | 0.31908 | 0.59403 | 0.272 | 0.31 | 1 | HC_vs_MS.NoTrt_F |
| ATAT1      | 0.31916 | 0.73072 | 0.121 | 0.16 | 1 | HC_vs_MS.NoTrt_F |

|          |         |         |       |      |   |                  |
|----------|---------|---------|-------|------|---|------------------|
| MFAP1    | 0.31926 | 0.62818 | 0.139 | 0.18 | 1 | HC_vs_MS.NoTrt_F |
| ILF3     | 0.31944 | 0.51779 | 0.803 | 0.83 | 1 | HC_vs_MS.NoTrt_F |
| KATNAL2  | 0.31977 | 0.66295 | 0.416 | 0.38 | 1 | HC_vs_MS.NoTrt_F |
| WIPF2    | 0.31982 | 0.40588 | 0.841 | 0.84 | 1 | HC_vs_MS.NoTrt_F |
| BRF1     | 0.32021 | 0.69407 | 0.624 | 0.58 | 1 | HC_vs_MS.NoTrt_F |
| NME1     | 0.32023 | 0.6361  | 0.639 | 0.56 | 1 | HC_vs_MS.NoTrt_F |
| ZMYND8   | 0.32024 | 0.32625 | 0.419 | 0.47 | 1 | HC_vs_MS.NoTrt_F |
| ZC3H14   | 0.32037 | -0.3334 | 0.957 | 0.97 | 1 | HC_vs_MS.NoTrt_F |
| WDR91    | 0.32051 | -0.2668 | 0.535 | 0.58 | 1 | HC_vs_MS.NoTrt_F |
| EMP2     | 0.32064 | 0.28064 | 0.957 | 0.95 | 1 | HC_vs_MS.NoTrt_F |
| HSD17B12 | 0.32086 | -0.4139 | 0.474 | 0.52 | 1 | HC_vs_MS.NoTrt_F |
| WDR75    | 0.32145 | 0.30134 | 0.358 | 0.43 | 1 | HC_vs_MS.NoTrt_F |
| ZNF19    | 0.32149 | 0.40876 | 0.815 | 0.84 | 1 | HC_vs_MS.NoTrt_F |
| CALU     | 0.32152 | 0.4132  | 0.425 | 0.49 | 1 | HC_vs_MS.NoTrt_F |
| KCTD6    | 0.32186 | -0.2661 | 0.656 | 0.65 | 1 | HC_vs_MS.NoTrt_F |
| ZNF528   | 0.32243 | 0.518   | 0.65  | 0.59 | 1 | HC_vs_MS.NoTrt_F |
| PLGLB1   | 0.32245 | 0.37708 | 0.185 | 0.23 | 1 | HC_vs_MS.NoTrt_F |
| RUNX1T1  | 0.32245 | 0.49408 | 0.249 | 0.28 | 1 | HC_vs_MS.NoTrt_F |
| GPT2     | 0.3227  | -0.34   | 0.549 | 0.5  | 1 | HC_vs_MS.NoTrt_F |
| ZFYVE26  | 0.32273 | 0.8853  | 0.876 | 0.86 | 1 | HC_vs_MS.NoTrt_F |
| CALCOCO2 | 0.32293 | -0.4132 | 0.994 | 1    | 1 | HC_vs_MS.NoTrt_F |
| ARSD     | 0.32329 | 0.51357 | 0.838 | 0.83 | 1 | HC_vs_MS.NoTrt_F |
| MGP      | 0.32334 | 0.8542  | 0.61  | 0.58 | 1 | HC_vs_MS.NoTrt_F |
| EMILIN2  | 0.32335 | 0.5033  | 0.48  | 0.53 | 1 | HC_vs_MS.NoTrt_F |
| UBE2G2   | 0.32371 | 0.50229 | 0.754 | 0.72 | 1 | HC_vs_MS.NoTrt_F |
| SLC16A5  | 0.32378 | 0.42232 | 0.191 | 0.23 | 1 | HC_vs_MS.NoTrt_F |
| LUC7L    | 0.32391 | 0.66167 | 0.864 | 0.85 | 1 | HC_vs_MS.NoTrt_F |
| VKORC1   | 0.3244  | 0.60374 | 0.214 | 0.25 | 1 | HC_vs_MS.NoTrt_F |
| ENPP2    | 0.32442 | 1.53059 | 0.156 | 0.13 | 1 | HC_vs_MS.NoTrt_F |
| IFIT2    | 0.32454 | -1.3089 | 0.116 | 0.15 | 1 | HC_vs_MS.NoTrt_F |
| YRDC     | 0.32465 | 0.96956 | 0.113 | 0.15 | 1 | HC_vs_MS.NoTrt_F |
| CCDC92   | 0.32471 | 0.33747 | 0.095 | 0.13 | 1 | HC_vs_MS.NoTrt_F |
| SLC9B1   | 0.32474 | 0.39921 | 0.419 | 0.47 | 1 | HC_vs_MS.NoTrt_F |
| AP1B1    | 0.32474 | 0.73902 | 0.28  | 0.25 | 1 | HC_vs_MS.NoTrt_F |
| TGFB11   | 0.3253  | 0.90669 | 0.332 | 0.38 | 1 | HC_vs_MS.NoTrt_F |
| ZNF215   | 0.32538 | 0.51817 | 0.422 | 0.5  | 1 | HC_vs_MS.NoTrt_F |
| HARS     | 0.32579 | -0.2675 | 0.867 | 0.87 | 1 | HC_vs_MS.NoTrt_F |
| TRAPPC2B | 0.32582 | 0.25869 | 0.436 | 0.39 | 1 | HC_vs_MS.NoTrt_F |
| DIP2C    | 0.32584 | 0.64759 | 0.116 | 0.15 | 1 | HC_vs_MS.NoTrt_F |
| SEC14L1  | 0.32586 | -0.314  | 0.731 | 0.79 | 1 | HC_vs_MS.NoTrt_F |

|            |         |         |       |      |   |                  |
|------------|---------|---------|-------|------|---|------------------|
| CCDC149    | 0.32598 | 0.52768 | 0.468 | 0.49 | 1 | HC_vs_MS.NoTrt_F |
| CCDC107    | 0.32653 | 0.39731 | 0.266 | 0.32 | 1 | HC_vs_MS.NoTrt_F |
| U2SURP     | 0.32679 | 0.55113 | 0.364 | 0.43 | 1 | HC_vs_MS.NoTrt_F |
| DGKD       | 0.32679 | 0.26977 | 0.691 | 0.64 | 1 | HC_vs_MS.NoTrt_F |
| IDH2       | 0.3268  | 0.49045 | 0.587 | 0.56 | 1 | HC_vs_MS.NoTrt_F |
| ZGPAT      | 0.32692 | 0.72054 | 0.208 | 0.25 | 1 | HC_vs_MS.NoTrt_F |
| CHPT1      | 0.32694 | 0.38657 | 0.642 | 0.61 | 1 | HC_vs_MS.NoTrt_F |
| UBE3D      | 0.327   | -0.3109 | 0.671 | 0.69 | 1 | HC_vs_MS.NoTrt_F |
| PTPN9      | 0.3274  | 0.85885 | 0.355 | 0.39 | 1 | HC_vs_MS.NoTrt_F |
| PRR5-ARHG, | 0.32745 | -0.6246 | 0.107 | 0.14 | 1 | HC_vs_MS.NoTrt_F |
| FURIN      | 0.32754 | -0.4407 | 0.11  | 0.14 | 1 | HC_vs_MS.NoTrt_F |
| TMEM126B   | 0.3281  | 0.31322 | 0.234 | 0.27 | 1 | HC_vs_MS.NoTrt_F |
| NXN        | 0.32835 | 0.379   | 0.578 | 0.55 | 1 | HC_vs_MS.NoTrt_F |
| EDF1       | 0.32859 | 0.28603 | 0.477 | 0.58 | 1 | HC_vs_MS.NoTrt_F |
| IFNLR1     | 0.32863 | -1.1648 | 0.13  | 0.17 | 1 | HC_vs_MS.NoTrt_F |
| RGS5       | 0.32883 | 1.68935 | 0.11  | 0.14 | 1 | HC_vs_MS.NoTrt_F |
| BHLHE40    | 0.32937 | 0.65463 | 0.156 | 0.2  | 1 | HC_vs_MS.NoTrt_F |
| AL589743.1 | 0.32956 | 0.25175 | 0.642 | 0.59 | 1 | HC_vs_MS.NoTrt_F |
| SYF2       | 0.32972 | 0.79538 | 0.5   | 0.48 | 1 | HC_vs_MS.NoTrt_F |
| WNT7A      | 0.33028 | 0.81202 | 0.098 | 0.13 | 1 | HC_vs_MS.NoTrt_F |
| VPS11      | 0.3304  | -0.7219 | 0.847 | 0.81 | 1 | HC_vs_MS.NoTrt_F |
| CDC14B     | 0.33043 | 0.4482  | 0.347 | 0.37 | 1 | HC_vs_MS.NoTrt_F |
| PBX2       | 0.33044 | 0.49162 | 0.173 | 0.21 | 1 | HC_vs_MS.NoTrt_F |
| PTPN1      | 0.33063 | 0.7811  | 0.41  | 0.39 | 1 | HC_vs_MS.NoTrt_F |
| CYP4V2     | 0.33087 | -0.3893 | 0.763 | 0.82 | 1 | HC_vs_MS.NoTrt_F |
| FCHO1      | 0.33113 | -0.5374 | 0.818 | 0.82 | 1 | HC_vs_MS.NoTrt_F |
| KCNC4      | 0.33196 | 0.78433 | 0.786 | 0.82 | 1 | HC_vs_MS.NoTrt_F |
| ZNF354B    | 0.33199 | 0.35699 | 0.361 | 0.41 | 1 | HC_vs_MS.NoTrt_F |
| NR3C1      | 0.33206 | 0.57725 | 0.338 | 0.3  | 1 | HC_vs_MS.NoTrt_F |
| QTRT1      | 0.33239 | 0.40282 | 0.844 | 0.83 | 1 | HC_vs_MS.NoTrt_F |
| USP12      | 0.33248 | 0.91378 | 0.124 | 0.16 | 1 | HC_vs_MS.NoTrt_F |
| SREK1      | 0.33248 | 0.56658 | 0.572 | 0.62 | 1 | HC_vs_MS.NoTrt_F |
| SF3A1      | 0.33261 | 0.35786 | 0.425 | 0.48 | 1 | HC_vs_MS.NoTrt_F |
| MCM6       | 0.33272 | 0.64069 | 0.173 | 0.22 | 1 | HC_vs_MS.NoTrt_F |
| CS         | 0.33367 | 0.26784 | 0.864 | 0.83 | 1 | HC_vs_MS.NoTrt_F |
| FAM120A    | 0.33476 | 0.46011 | 0.211 | 0.25 | 1 | HC_vs_MS.NoTrt_F |
| ABAT       | 0.33479 | -0.3939 | 0.656 | 0.67 | 1 | HC_vs_MS.NoTrt_F |
| FSCN1      | 0.33494 | 1.278   | 0.101 | 0.13 | 1 | HC_vs_MS.NoTrt_F |
| BACH2      | 0.33509 | 0.78089 | 0.292 | 0.26 | 1 | HC_vs_MS.NoTrt_F |
| CDCA7L     | 0.33521 | 0.69955 | 0.127 | 0.16 | 1 | HC_vs_MS.NoTrt_F |

|         |         |         |       |      |   |                  |
|---------|---------|---------|-------|------|---|------------------|
| USP28   | 0.33537 | 0.89152 | 0.41  | 0.44 | 1 | HC_vs_MS.NoTrt_F |
| NTRK1   | 0.33549 | 0.72318 | 0.249 | 0.3  | 1 | HC_vs_MS.NoTrt_F |
| BCL3    | 0.33564 | 0.42564 | 0.147 | 0.19 | 1 | HC_vs_MS.NoTrt_F |
| SRGAP2C | 0.33577 | -0.2585 | 0.549 | 0.58 | 1 | HC_vs_MS.NoTrt_F |
| DOCK6   | 0.33589 | 1.00247 | 0.552 | 0.6  | 1 | HC_vs_MS.NoTrt_F |
| CFDP1   | 0.33593 | -0.2925 | 0.676 | 0.7  | 1 | HC_vs_MS.NoTrt_F |
| CORO1C  | 0.3362  | 1.46861 | 0.081 | 0.11 | 1 | HC_vs_MS.NoTrt_F |
| DZANK1  | 0.33654 | 0.27633 | 0.763 | 0.7  | 1 | HC_vs_MS.NoTrt_F |
| STK40   | 0.33665 | 0.67775 | 0.136 | 0.17 | 1 | HC_vs_MS.NoTrt_F |
| TPST2   | 0.33688 | 0.61333 | 0.717 | 0.65 | 1 | HC_vs_MS.NoTrt_F |
| POGK    | 0.33695 | 0.28343 | 0.312 | 0.35 | 1 | HC_vs_MS.NoTrt_F |
| UNC13D  | 0.3371  | 0.28952 | 0.642 | 0.71 | 1 | HC_vs_MS.NoTrt_F |
| DUSP19  | 0.33774 | 0.26477 | 0.737 | 0.71 | 1 | HC_vs_MS.NoTrt_F |
| EIF1AY  | 0.33844 | -0.6474 | 0.671 | 0.67 | 1 | HC_vs_MS.NoTrt_F |
| KRI1    | 0.33867 | -0.2808 | 0.549 | 0.56 | 1 | HC_vs_MS.NoTrt_F |
| FGD2    | 0.33935 | 0.52186 | 0.783 | 0.78 | 1 | HC_vs_MS.NoTrt_F |
| CHD1    | 0.33972 | 0.25024 | 0.558 | 0.6  | 1 | HC_vs_MS.NoTrt_F |
| CLEC4E  | 0.34018 | 0.64572 | 0.425 | 0.49 | 1 | HC_vs_MS.NoTrt_F |
| DIP2B   | 0.34021 | 0.42557 | 0.436 | 0.51 | 1 | HC_vs_MS.NoTrt_F |
| MORN1   | 0.34038 | 0.772   | 0.598 | 0.55 | 1 | HC_vs_MS.NoTrt_F |
| CLEC18A | 0.34069 | 0.58233 | 0.405 | 0.43 | 1 | HC_vs_MS.NoTrt_F |
| NPIPA1  | 0.34073 | 0.29564 | 0.702 | 0.77 | 1 | HC_vs_MS.NoTrt_F |
| TAF1B   | 0.34086 | -0.5136 | 0.61  | 0.63 | 1 | HC_vs_MS.NoTrt_F |
| GPATCH4 | 0.34146 | 0.3241  | 0.315 | 0.35 | 1 | HC_vs_MS.NoTrt_F |
| SH2D1B  | 0.34191 | 1.78847 | 0.263 | 0.24 | 1 | HC_vs_MS.NoTrt_F |
| ZNF14   | 0.34191 | 1.06757 | 0.387 | 0.41 | 1 | HC_vs_MS.NoTrt_F |
| MAP1B   | 0.34192 | 0.40162 | 0.101 | 0.08 | 1 | HC_vs_MS.NoTrt_F |
| TNFRSF4 | 0.34195 | 0.53841 | 0.24  | 0.29 | 1 | HC_vs_MS.NoTrt_F |
| BCL2L13 | 0.34209 | -0.6292 | 0.59  | 0.6  | 1 | HC_vs_MS.NoTrt_F |
| AZIN2   | 0.34232 | 1.06111 | 0.379 | 0.36 | 1 | HC_vs_MS.NoTrt_F |
| FOXRED1 | 0.34291 | 0.98183 | 0.549 | 0.52 | 1 | HC_vs_MS.NoTrt_F |
| PMS2    | 0.34314 | 0.81167 | 0.685 | 0.73 | 1 | HC_vs_MS.NoTrt_F |
| SIN3A   | 0.34327 | -0.2871 | 0.832 | 0.84 | 1 | HC_vs_MS.NoTrt_F |
| FRMD3   | 0.34329 | 0.29652 | 0.124 | 0.1  | 1 | HC_vs_MS.NoTrt_F |
| BTD     | 0.34353 | 1.09606 | 0.136 | 0.17 | 1 | HC_vs_MS.NoTrt_F |
| SPON2   | 0.34354 | 0.61108 | 0.488 | 0.53 | 1 | HC_vs_MS.NoTrt_F |
| CHMP5   | 0.34358 | 0.38356 | 0.168 | 0.2  | 1 | HC_vs_MS.NoTrt_F |
| PAM16   | 0.34366 | 0.74364 | 0.237 | 0.28 | 1 | HC_vs_MS.NoTrt_F |
| PCYOX1  | 0.34371 | -0.3371 | 0.841 | 0.83 | 1 | HC_vs_MS.NoTrt_F |
| PGAP2   | 0.34374 | 0.61454 | 0.107 | 0.14 | 1 | HC_vs_MS.NoTrt_F |

|           |         |         |       |      |   |                  |
|-----------|---------|---------|-------|------|---|------------------|
| DCC       | 0.34376 | 0.37545 | 0.116 | 0.15 | 1 | HC_vs_MS.NoTrt_F |
| REV3L     | 0.34378 | 0.30166 | 0.74  | 0.79 | 1 | HC_vs_MS.NoTrt_F |
| NCSTN     | 0.34395 | 0.27259 | 0.24  | 0.29 | 1 | HC_vs_MS.NoTrt_F |
| SNX30     | 0.34416 | 0.47597 | 0.543 | 0.5  | 1 | HC_vs_MS.NoTrt_F |
| SMC1A     | 0.34426 | 0.62393 | 0.263 | 0.32 | 1 | HC_vs_MS.NoTrt_F |
| HPS4      | 0.3443  | 0.68515 | 0.818 | 0.85 | 1 | HC_vs_MS.NoTrt_F |
| PDE1B     | 0.34447 | 0.6482  | 0.601 | 0.56 | 1 | HC_vs_MS.NoTrt_F |
| FMNL1     | 0.34461 | 0.76576 | 0.714 | 0.85 | 1 | HC_vs_MS.NoTrt_F |
| DHRS11    | 0.34479 | 0.54498 | 0.344 | 0.37 | 1 | HC_vs_MS.NoTrt_F |
| ANKRD49   | 0.34496 | 0.88422 | 0.22  | 0.27 | 1 | HC_vs_MS.NoTrt_F |
| KCTD18    | 0.34499 | 0.25352 | 0.832 | 0.86 | 1 | HC_vs_MS.NoTrt_F |
| ZNF491    | 0.34514 | 0.50651 | 0.488 | 0.53 | 1 | HC_vs_MS.NoTrt_F |
| CACNA1F   | 0.34538 | 0.73469 | 0.318 | 0.37 | 1 | HC_vs_MS.NoTrt_F |
| ADGRL1    | 0.3455  | 1.29421 | 0.101 | 0.13 | 1 | HC_vs_MS.NoTrt_F |
| PDE6B     | 0.34565 | 0.50587 | 0.711 | 0.66 | 1 | HC_vs_MS.NoTrt_F |
| DDX21     | 0.34574 | 0.42973 | 0.393 | 0.45 | 1 | HC_vs_MS.NoTrt_F |
| AK3       | 0.34581 | -0.4547 | 0.497 | 0.51 | 1 | HC_vs_MS.NoTrt_F |
| RBBP5     | 0.34592 | 0.27567 | 0.59  | 0.63 | 1 | HC_vs_MS.NoTrt_F |
| APBA2     | 0.34593 | 0.51167 | 0.549 | 0.61 | 1 | HC_vs_MS.NoTrt_F |
| POLR3E    | 0.34599 | 0.32389 | 0.474 | 0.56 | 1 | HC_vs_MS.NoTrt_F |
| CHSY1     | 0.34734 | -0.7648 | 0.324 | 0.36 | 1 | HC_vs_MS.NoTrt_F |
| ZNF587B   | 0.34747 | 0.52905 | 0.35  | 0.38 | 1 | HC_vs_MS.NoTrt_F |
| N4BP2L1   | 0.3475  | -0.5297 | 0.653 | 0.7  | 1 | HC_vs_MS.NoTrt_F |
| CCS       | 0.34873 | 0.35398 | 0.329 | 0.29 | 1 | HC_vs_MS.NoTrt_F |
| ZNF419    | 0.34879 | 0.40638 | 0.876 | 0.85 | 1 | HC_vs_MS.NoTrt_F |
| MPI       | 0.34896 | 0.65213 | 0.517 | 0.56 | 1 | HC_vs_MS.NoTrt_F |
| ADPRH     | 0.34903 | 2.88411 | 0.081 | 0.11 | 1 | HC_vs_MS.NoTrt_F |
| LRP1      | 0.34925 | 1.24574 | 0.344 | 0.29 | 1 | HC_vs_MS.NoTrt_F |
| CSNK2A1   | 0.34964 | -0.6011 | 0.76  | 0.78 | 1 | HC_vs_MS.NoTrt_F |
| RHOT1     | 0.34979 | 0.69507 | 0.254 | 0.29 | 1 | HC_vs_MS.NoTrt_F |
| NECAB1    | 0.35037 | 0.72071 | 0.156 | 0.19 | 1 | HC_vs_MS.NoTrt_F |
| FBXO24    | 0.35042 | -0.3135 | 0.517 | 0.51 | 1 | HC_vs_MS.NoTrt_F |
| GTF2IRD2B | 0.35078 | -0.2553 | 0.879 | 0.9  | 1 | HC_vs_MS.NoTrt_F |
| FOXP3     | 0.3515  | 0.27633 | 0.503 | 0.56 | 1 | HC_vs_MS.NoTrt_F |
| PLAUR     | 0.3516  | 1.92813 | 0.647 | 0.61 | 1 | HC_vs_MS.NoTrt_F |
| DIEXF     | 0.35185 | 0.46709 | 0.555 | 0.49 | 1 | HC_vs_MS.NoTrt_F |
| ZBTB4     | 0.35217 | 0.61048 | 0.194 | 0.23 | 1 | HC_vs_MS.NoTrt_F |
| CTSW      | 0.35226 | 1.15458 | 0.688 | 0.61 | 1 | HC_vs_MS.NoTrt_F |
| ATN1      | 0.3523  | 0.78761 | 0.26  | 0.23 | 1 | HC_vs_MS.NoTrt_F |
| SLC12A2   | 0.35274 | 0.64997 | 0.572 | 0.59 | 1 | HC_vs_MS.NoTrt_F |

|           |         |         |       |      |   |                  |
|-----------|---------|---------|-------|------|---|------------------|
| TPP1      | 0.353   | 0.847   | 0.477 | 0.5  | 1 | HC_vs_MS.NoTrt_F |
| HACE1     | 0.35346 | -0.2952 | 0.688 | 0.68 | 1 | HC_vs_MS.NoTrt_F |
| ELP3      | 0.35365 | -0.3711 | 0.497 | 0.5  | 1 | HC_vs_MS.NoTrt_F |
| ZNF160    | 0.35375 | 0.72851 | 0.621 | 0.59 | 1 | HC_vs_MS.NoTrt_F |
| FAM222B   | 0.3539  | 0.67165 | 0.22  | 0.26 | 1 | HC_vs_MS.NoTrt_F |
| KDM2A     | 0.35411 | 0.35147 | 0.919 | 0.93 | 1 | HC_vs_MS.NoTrt_F |
| VPS33B    | 0.35425 | 1.12924 | 0.416 | 0.46 | 1 | HC_vs_MS.NoTrt_F |
| PFKFB3    | 0.35428 | -0.2648 | 0.344 | 0.4  | 1 | HC_vs_MS.NoTrt_F |
| MSTO1     | 0.3544  | 1.27652 | 0.139 | 0.18 | 1 | HC_vs_MS.NoTrt_F |
| NCR3LG1   | 0.35571 | -0.8276 | 0.084 | 0.11 | 1 | HC_vs_MS.NoTrt_F |
| PPM1N     | 0.35605 | 0.72117 | 0.162 | 0.19 | 1 | HC_vs_MS.NoTrt_F |
| RABIF     | 0.35605 | 0.40618 | 0.422 | 0.45 | 1 | HC_vs_MS.NoTrt_F |
| TM2D1     | 0.35627 | 0.345   | 0.916 | 0.92 | 1 | HC_vs_MS.NoTrt_F |
| BAG6      | 0.35679 | 1.06272 | 0.691 | 0.59 | 1 | HC_vs_MS.NoTrt_F |
| FIBP      | 0.35711 | 0.59636 | 0.561 | 0.53 | 1 | HC_vs_MS.NoTrt_F |
| MTR       | 0.35795 | -0.6453 | 0.569 | 0.55 | 1 | HC_vs_MS.NoTrt_F |
| SMAD3     | 0.35814 | 0.6829  | 0.214 | 0.25 | 1 | HC_vs_MS.NoTrt_F |
| WDR92     | 0.35837 | 0.35787 | 0.743 | 0.73 | 1 | HC_vs_MS.NoTrt_F |
| MCC       | 0.35842 | 0.43485 | 0.532 | 0.53 | 1 | HC_vs_MS.NoTrt_F |
| CC2D1B    | 0.35881 | 0.29688 | 0.65  | 0.63 | 1 | HC_vs_MS.NoTrt_F |
| CTSH      | 0.35917 | 0.57618 | 0.116 | 0.14 | 1 | HC_vs_MS.NoTrt_F |
| TXNL1     | 0.3592  | 0.46842 | 0.668 | 0.71 | 1 | HC_vs_MS.NoTrt_F |
| ZNF45     | 0.35925 | -0.4997 | 0.344 | 0.38 | 1 | HC_vs_MS.NoTrt_F |
| KCNMB4    | 0.35925 | 0.40735 | 0.37  | 0.41 | 1 | HC_vs_MS.NoTrt_F |
| CEP126    | 0.35947 | 0.41468 | 0.783 | 0.81 | 1 | HC_vs_MS.NoTrt_F |
| SH2B3     | 0.35976 | 0.36636 | 0.208 | 0.24 | 1 | HC_vs_MS.NoTrt_F |
| NR4A3     | 0.35997 | 0.70076 | 0.246 | 0.22 | 1 | HC_vs_MS.NoTrt_F |
| APLP1     | 0.36018 | 0.38797 | 0.676 | 0.63 | 1 | HC_vs_MS.NoTrt_F |
| ZNF75D    | 0.36062 | 0.86063 | 0.176 | 0.15 | 1 | HC_vs_MS.NoTrt_F |
| CBWD1     | 0.36065 | 0.56627 | 0.708 | 0.74 | 1 | HC_vs_MS.NoTrt_F |
| AOAH      | 0.3609  | 0.33887 | 0.428 | 0.47 | 1 | HC_vs_MS.NoTrt_F |
| CTSC      | 0.36108 | 0.32872 | 0.928 | 0.91 | 1 | HC_vs_MS.NoTrt_F |
| RND2      | 0.36109 | 0.38346 | 0.425 | 0.44 | 1 | HC_vs_MS.NoTrt_F |
| RFK       | 0.36123 | 0.60498 | 0.5   | 0.53 | 1 | HC_vs_MS.NoTrt_F |
| KIAA0319L | 0.36128 | -0.2916 | 0.725 | 0.75 | 1 | HC_vs_MS.NoTrt_F |
| BCL9L     | 0.36175 | 0.97601 | 0.205 | 0.25 | 1 | HC_vs_MS.NoTrt_F |
| KIAA1161  | 0.36201 | 0.26801 | 0.876 | 0.89 | 1 | HC_vs_MS.NoTrt_F |
| PLA2G15   | 0.36277 | -0.6937 | 0.841 | 0.82 | 1 | HC_vs_MS.NoTrt_F |
| PEAK1     | 0.36285 | 0.34083 | 0.957 | 0.96 | 1 | HC_vs_MS.NoTrt_F |
| UQCRH     | 0.36299 | 0.79857 | 0.581 | 0.59 | 1 | HC_vs_MS.NoTrt_F |



|          |         |         |       |      |   |                  |
|----------|---------|---------|-------|------|---|------------------|
| ANKRD10  | 0.36336 | 0.30254 | 0.717 | 0.8  | 1 | HC_vs_MS.NoTrt_F |
| LRRC49   | 0.36342 | 1.11468 | 0.792 | 0.87 | 1 | HC_vs_MS.NoTrt_F |
| MPP6     | 0.36388 | 0.91906 | 0.335 | 0.38 | 1 | HC_vs_MS.NoTrt_F |
| RELB     | 0.36446 | 0.55797 | 0.159 | 0.19 | 1 | HC_vs_MS.NoTrt_F |
| CD99L2   | 0.36449 | 0.7122  | 0.168 | 0.2  | 1 | HC_vs_MS.NoTrt_F |
| MIB1     | 0.3648  | 0.50237 | 0.171 | 0.2  | 1 | HC_vs_MS.NoTrt_F |
| TMEM144  | 0.36648 | 0.29359 | 0.205 | 0.24 | 1 | HC_vs_MS.NoTrt_F |
| C14orf80 | 0.36757 | 1.21002 | 0.324 | 0.35 | 1 | HC_vs_MS.NoTrt_F |
| SYT2     | 0.36767 | 1.01382 | 0.081 | 0.11 | 1 | HC_vs_MS.NoTrt_F |
| RANBP2   | 0.36777 | 0.28638 | 0.592 | 0.6  | 1 | HC_vs_MS.NoTrt_F |
| FAR2     | 0.3682  | 0.26344 | 0.237 | 0.28 | 1 | HC_vs_MS.NoTrt_F |
| ATP6VOD1 | 0.3684  | -0.2711 | 0.717 | 0.74 | 1 | HC_vs_MS.NoTrt_F |
| PLEKHG2  | 0.36843 | 0.71549 | 0.916 | 0.88 | 1 | HC_vs_MS.NoTrt_F |
| SPPL3    | 0.36875 | 0.47961 | 0.61  | 0.65 | 1 | HC_vs_MS.NoTrt_F |
| DNHD1    | 0.36884 | 0.4473  | 0.39  | 0.35 | 1 | HC_vs_MS.NoTrt_F |
| METTL21B | 0.36899 | 0.78441 | 0.535 | 0.53 | 1 | HC_vs_MS.NoTrt_F |
| HAT1     | 0.36931 | 0.55197 | 0.884 | 0.91 | 1 | HC_vs_MS.NoTrt_F |
| ZNF839   | 0.36941 | -0.2934 | 0.751 | 0.8  | 1 | HC_vs_MS.NoTrt_F |
| LDAH     | 0.36956 | -0.2798 | 0.153 | 0.18 | 1 | HC_vs_MS.NoTrt_F |
| SEZ6     | 0.36973 | 0.7851  | 0.13  | 0.16 | 1 | HC_vs_MS.NoTrt_F |
| PIN1     | 0.37014 | 0.76039 | 0.795 | 0.79 | 1 | HC_vs_MS.NoTrt_F |
| HIST1H1C | 0.37042 | 0.43236 | 0.182 | 0.22 | 1 | HC_vs_MS.NoTrt_F |
| PDE4A    | 0.37089 | 0.27661 | 0.176 | 0.22 | 1 | HC_vs_MS.NoTrt_F |
| GARNL3   | 0.37142 | 0.73654 | 0.223 | 0.25 | 1 | HC_vs_MS.NoTrt_F |
| MIEF1    | 0.37152 | -0.6255 | 0.477 | 0.5  | 1 | HC_vs_MS.NoTrt_F |
| ATP13A2  | 0.37255 | 0.33695 | 0.5   | 0.53 | 1 | HC_vs_MS.NoTrt_F |
| SORD     | 0.37258 | 0.42055 | 0.214 | 0.25 | 1 | HC_vs_MS.NoTrt_F |
| ZNF71    | 0.37268 | -0.3213 | 0.292 | 0.32 | 1 | HC_vs_MS.NoTrt_F |
| KDM3B    | 0.37306 | -0.284  | 0.425 | 0.43 | 1 | HC_vs_MS.NoTrt_F |
| TONSL    | 0.37337 | 0.52283 | 0.668 | 0.66 | 1 | HC_vs_MS.NoTrt_F |
| RIN2     | 0.37339 | 0.64663 | 0.361 | 0.3  | 1 | HC_vs_MS.NoTrt_F |
| ADAMTS17 | 0.37363 | 0.90188 | 0.217 | 0.25 | 1 | HC_vs_MS.NoTrt_F |
| CDK4     | 0.37394 | 0.82184 | 0.636 | 0.64 | 1 | HC_vs_MS.NoTrt_F |
| ZNF396   | 0.37422 | 0.27284 | 0.896 | 0.92 | 1 | HC_vs_MS.NoTrt_F |
| ZFAND4   | 0.37463 | -0.5546 | 0.523 | 0.47 | 1 | HC_vs_MS.NoTrt_F |
| LCAT     | 0.37504 | 0.49564 | 0.263 | 0.3  | 1 | HC_vs_MS.NoTrt_F |
| IL17RC   | 0.3751  | 0.5039  | 0.439 | 0.37 | 1 | HC_vs_MS.NoTrt_F |
| SMAD1    | 0.37518 | 0.81431 | 0.442 | 0.4  | 1 | HC_vs_MS.NoTrt_F |
| PPP1R16B | 0.37555 | 0.97301 | 0.355 | 0.43 | 1 | HC_vs_MS.NoTrt_F |
| C15orf57 | 0.37607 | -0.269  | 0.841 | 0.84 | 1 | HC_vs_MS.NoTrt_F |

|             |         |         |       |      |   |                  |
|-------------|---------|---------|-------|------|---|------------------|
| EEF1E1      | 0.37609 | 0.45719 | 0.621 | 0.56 | 1 | HC_vs_MS.NoTrt_F |
| ALDH5A1     | 0.37615 | -0.428  | 0.529 | 0.57 | 1 | HC_vs_MS.NoTrt_F |
| DIS3        | 0.37624 | -0.3105 | 0.731 | 0.76 | 1 | HC_vs_MS.NoTrt_F |
| SMURF2      | 0.37668 | 0.78318 | 0.801 | 0.86 | 1 | HC_vs_MS.NoTrt_F |
| ERCC5       | 0.37677 | 0.40359 | 0.436 | 0.48 | 1 | HC_vs_MS.NoTrt_F |
| ARHGEF40    | 0.37686 | -0.5311 | 0.217 | 0.25 | 1 | HC_vs_MS.NoTrt_F |
| FAM174B     | 0.37701 | 1.11019 | 0.173 | 0.21 | 1 | HC_vs_MS.NoTrt_F |
| ZNF418      | 0.37708 | 0.90439 | 0.194 | 0.23 | 1 | HC_vs_MS.NoTrt_F |
| QSOX1       | 0.37743 | 0.97541 | 0.474 | 0.43 | 1 | HC_vs_MS.NoTrt_F |
| USP36       | 0.37785 | 0.32341 | 0.535 | 0.62 | 1 | HC_vs_MS.NoTrt_F |
| RNF165      | 0.37789 | 0.50451 | 0.54  | 0.51 | 1 | HC_vs_MS.NoTrt_F |
| UBA1        | 0.37821 | 0.56352 | 0.844 | 0.85 | 1 | HC_vs_MS.NoTrt_F |
| SOCS4       | 0.37825 | 0.72207 | 0.379 | 0.41 | 1 | HC_vs_MS.NoTrt_F |
| PANK3       | 0.37847 | 0.79538 | 0.471 | 0.44 | 1 | HC_vs_MS.NoTrt_F |
| PPP2R1B     | 0.37872 | 0.3485  | 0.514 | 0.47 | 1 | HC_vs_MS.NoTrt_F |
| OSBPL2      | 0.37906 | -0.304  | 0.523 | 0.55 | 1 | HC_vs_MS.NoTrt_F |
| BBIP1       | 0.37937 | 0.26296 | 0.665 | 0.65 | 1 | HC_vs_MS.NoTrt_F |
| RP11-80H18  | 0.37944 | 0.48401 | 0.318 | 0.37 | 1 | HC_vs_MS.NoTrt_F |
| DENND4C     | 0.37958 | 0.51846 | 0.442 | 0.48 | 1 | HC_vs_MS.NoTrt_F |
| MPV17L2     | 0.37992 | 0.57165 | 0.243 | 0.28 | 1 | HC_vs_MS.NoTrt_F |
| ADGRD1      | 0.38048 | 0.61474 | 0.436 | 0.52 | 1 | HC_vs_MS.NoTrt_F |
| VEPH1       | 0.3818  | 0.35207 | 0.113 | 0.14 | 1 | HC_vs_MS.NoTrt_F |
| CYHR1       | 0.38185 | 0.27826 | 0.306 | 0.35 | 1 | HC_vs_MS.NoTrt_F |
| NAV2        | 0.38228 | 1.23072 | 0.408 | 0.42 | 1 | HC_vs_MS.NoTrt_F |
| GRINA       | 0.38231 | 0.85156 | 0.121 | 0.16 | 1 | HC_vs_MS.NoTrt_F |
| UBE2L5P     | 0.38255 | 0.42285 | 0.283 | 0.31 | 1 | HC_vs_MS.NoTrt_F |
| C14orf2     | 0.38288 | -0.2603 | 0.855 | 0.9  | 1 | HC_vs_MS.NoTrt_F |
| CERS5       | 0.38306 | -0.3481 | 0.988 | 0.98 | 1 | HC_vs_MS.NoTrt_F |
| RAB26       | 0.38334 | 0.50178 | 0.179 | 0.22 | 1 | HC_vs_MS.NoTrt_F |
| SS18L1      | 0.38349 | -0.3694 | 0.465 | 0.5  | 1 | HC_vs_MS.NoTrt_F |
| CH507-9B2.! | 0.3839  | 0.60634 | 0.142 | 0.17 | 1 | HC_vs_MS.NoTrt_F |
| ZNF175      | 0.38392 | 0.39351 | 0.211 | 0.24 | 1 | HC_vs_MS.NoTrt_F |
| AP4M1       | 0.38418 | -0.3833 | 0.671 | 0.69 | 1 | HC_vs_MS.NoTrt_F |
| NKD1        | 0.38421 | 0.50832 | 0.425 | 0.49 | 1 | HC_vs_MS.NoTrt_F |
| RNF141      | 0.38421 | 0.59979 | 0.445 | 0.46 | 1 | HC_vs_MS.NoTrt_F |
| B3GNT2      | 0.38477 | 0.37956 | 0.188 | 0.23 | 1 | HC_vs_MS.NoTrt_F |
| RGS3        | 0.38539 | 0.36542 | 0.558 | 0.49 | 1 | HC_vs_MS.NoTrt_F |
| PPME1       | 0.38623 | 0.8948  | 0.182 | 0.22 | 1 | HC_vs_MS.NoTrt_F |
| GBA         | 0.3865  | -0.8355 | 0.506 | 0.5  | 1 | HC_vs_MS.NoTrt_F |
| AKAP12      | 0.38666 | 0.97899 | 0.09  | 0.12 | 1 | HC_vs_MS.NoTrt_F |

|          |         |         |       |      |   |                  |
|----------|---------|---------|-------|------|---|------------------|
| NSMF     | 0.38687 | 2.12296 | 0.11  | 0.14 | 1 | HC_vs_MS.NoTrt_F |
| THEMIS   | 0.38699 | 0.85145 | 0.272 | 0.31 | 1 | HC_vs_MS.NoTrt_F |
| HOMER2   | 0.38704 | -0.5737 | 0.616 | 0.64 | 1 | HC_vs_MS.NoTrt_F |
| MYBL1    | 0.38761 | 0.78161 | 0.078 | 0.11 | 1 | HC_vs_MS.NoTrt_F |
| SLC2A8   | 0.38773 | -1.1174 | 0.327 | 0.38 | 1 | HC_vs_MS.NoTrt_F |
| PRRT2    | 0.38788 | 1.06041 | 0.208 | 0.25 | 1 | HC_vs_MS.NoTrt_F |
| PDZD2    | 0.38802 | 0.63418 | 0.697 | 0.66 | 1 | HC_vs_MS.NoTrt_F |
| CAPRIN1  | 0.38834 | -0.4189 | 0.347 | 0.37 | 1 | HC_vs_MS.NoTrt_F |
| C1orf52  | 0.38853 | 0.27341 | 0.35  | 0.38 | 1 | HC_vs_MS.NoTrt_F |
| ATP1B3   | 0.38882 | 0.68956 | 0.211 | 0.26 | 1 | HC_vs_MS.NoTrt_F |
| CHKA     | 0.38947 | 1.76078 | 0.092 | 0.12 | 1 | HC_vs_MS.NoTrt_F |
| C1QTNF6  | 0.38958 | 0.37526 | 0.627 | 0.67 | 1 | HC_vs_MS.NoTrt_F |
| FIS1     | 0.38994 | 0.64362 | 0.367 | 0.41 | 1 | HC_vs_MS.NoTrt_F |
| RECQL5   | 0.39008 | 0.49306 | 0.257 | 0.29 | 1 | HC_vs_MS.NoTrt_F |
| TRIM39   | 0.39082 | 0.4285  | 0.191 | 0.23 | 1 | HC_vs_MS.NoTrt_F |
| GATAD2A  | 0.39082 | 0.58484 | 0.749 | 0.77 | 1 | HC_vs_MS.NoTrt_F |
| F2R      | 0.39101 | 0.5837  | 0.578 | 0.56 | 1 | HC_vs_MS.NoTrt_F |
| HAUS6    | 0.39195 | 0.39528 | 0.39  | 0.43 | 1 | HC_vs_MS.NoTrt_F |
| NIFK     | 0.39242 | -0.4197 | 0.572 | 0.59 | 1 | HC_vs_MS.NoTrt_F |
| MVD      | 0.39267 | 0.6523  | 0.552 | 0.58 | 1 | HC_vs_MS.NoTrt_F |
| POU5F1   | 0.39285 | 0.28362 | 0.564 | 0.55 | 1 | HC_vs_MS.NoTrt_F |
| MAGI1    | 0.39366 | 0.25571 | 0.133 | 0.11 | 1 | HC_vs_MS.NoTrt_F |
| SPDYE3   | 0.39368 | 0.74258 | 0.506 | 0.56 | 1 | HC_vs_MS.NoTrt_F |
| BGN      | 0.3941  | 1.59323 | 0.084 | 0.11 | 1 | HC_vs_MS.NoTrt_F |
| COL5A1   | 0.39414 | 1.10833 | 0.104 | 0.08 | 1 | HC_vs_MS.NoTrt_F |
| SHKBP1   | 0.39426 | 0.27478 | 0.775 | 0.83 | 1 | HC_vs_MS.NoTrt_F |
| PANK1    | 0.39446 | 0.63756 | 0.497 | 0.47 | 1 | HC_vs_MS.NoTrt_F |
| APOBEC3D | 0.39449 | 0.34316 | 0.723 | 0.75 | 1 | HC_vs_MS.NoTrt_F |
| PTK6     | 0.39451 | 0.46191 | 0.405 | 0.38 | 1 | HC_vs_MS.NoTrt_F |
| IGF2R    | 0.3947  | 0.33273 | 0.486 | 0.51 | 1 | HC_vs_MS.NoTrt_F |
| RYR3     | 0.3948  | -0.3803 | 0.532 | 0.5  | 1 | HC_vs_MS.NoTrt_F |
| MS4A2    | 0.39487 | 0.87302 | 0.61  | 0.59 | 1 | HC_vs_MS.NoTrt_F |
| COX7C    | 0.39499 | 0.26433 | 0.48  | 0.6  | 1 | HC_vs_MS.NoTrt_F |
| CD8B     | 0.3952  | 2.67337 | 0.121 | 0.16 | 1 | HC_vs_MS.NoTrt_F |
| LSM11    | 0.39532 | 0.47027 | 0.607 | 0.64 | 1 | HC_vs_MS.NoTrt_F |
| FSBP     | 0.39596 | 0.59333 | 0.384 | 0.43 | 1 | HC_vs_MS.NoTrt_F |
| APOL1    | 0.39606 | -0.6384 | 0.702 | 0.72 | 1 | HC_vs_MS.NoTrt_F |
| ZNF197   | 0.39756 | -0.691  | 0.538 | 0.59 | 1 | HC_vs_MS.NoTrt_F |
| SFR1     | 0.39773 | 0.31994 | 0.292 | 0.32 | 1 | HC_vs_MS.NoTrt_F |
| PPP1R3G  | 0.39789 | 0.27009 | 0.269 | 0.32 | 1 | HC_vs_MS.NoTrt_F |

|             |         |         |       |      |   |                  |
|-------------|---------|---------|-------|------|---|------------------|
| DNAJC1      | 0.39792 | 2.13834 | 0.199 | 0.18 | 1 | HC_vs_MS.NoTrt_F |
| DCAF6       | 0.39833 | 0.82921 | 0.269 | 0.31 | 1 | HC_vs_MS.NoTrt_F |
| IFT81       | 0.39871 | 0.27872 | 0.792 | 0.79 | 1 | HC_vs_MS.NoTrt_F |
| FAM111A     | 0.39895 | -0.8234 | 0.552 | 0.54 | 1 | HC_vs_MS.NoTrt_F |
| RAI14       | 0.3993  | 0.36288 | 0.121 | 0.15 | 1 | HC_vs_MS.NoTrt_F |
| GLTSCR1     | 0.39967 | 0.40377 | 0.688 | 0.64 | 1 | HC_vs_MS.NoTrt_F |
| STXBP5      | 0.40032 | 0.45946 | 0.197 | 0.23 | 1 | HC_vs_MS.NoTrt_F |
| INPP4B      | 0.4004  | 0.57896 | 0.601 | 0.6  | 1 | HC_vs_MS.NoTrt_F |
| SEC13       | 0.40046 | 0.50604 | 0.22  | 0.26 | 1 | HC_vs_MS.NoTrt_F |
| ZNF662      | 0.4005  | 0.32807 | 0.595 | 0.58 | 1 | HC_vs_MS.NoTrt_F |
| FABP2       | 0.4006  | 0.34593 | 0.442 | 0.44 | 1 | HC_vs_MS.NoTrt_F |
| POLR2L      | 0.40071 | 0.33372 | 0.321 | 0.37 | 1 | HC_vs_MS.NoTrt_F |
| ETHE1       | 0.40139 | 0.66161 | 0.136 | 0.17 | 1 | HC_vs_MS.NoTrt_F |
| RP11-435I1C | 0.40164 | -0.2846 | 0.399 | 0.45 | 1 | HC_vs_MS.NoTrt_F |
| USP1        | 0.4018  | 0.78617 | 0.197 | 0.23 | 1 | HC_vs_MS.NoTrt_F |
| GALNT2      | 0.40184 | -0.3472 | 0.286 | 0.32 | 1 | HC_vs_MS.NoTrt_F |
| MBTPS2      | 0.40194 | -0.4701 | 0.353 | 0.38 | 1 | HC_vs_MS.NoTrt_F |
| DDX11       | 0.40207 | -0.2731 | 0.486 | 0.5  | 1 | HC_vs_MS.NoTrt_F |
| MX2         | 0.4027  | 0.37085 | 0.913 | 0.9  | 1 | HC_vs_MS.NoTrt_F |
| ORC2        | 0.40282 | 0.30824 | 0.694 | 0.73 | 1 | HC_vs_MS.NoTrt_F |
| TM7SF3      | 0.40343 | -0.5773 | 0.951 | 0.93 | 1 | HC_vs_MS.NoTrt_F |
| ATP6V0B     | 0.40364 | 0.612   | 0.26  | 0.32 | 1 | HC_vs_MS.NoTrt_F |
| TIPIN       | 0.4043  | 0.51172 | 0.639 | 0.62 | 1 | HC_vs_MS.NoTrt_F |
| FNIP2       | 0.40448 | 0.43734 | 0.35  | 0.4  | 1 | HC_vs_MS.NoTrt_F |
| PRKCE       | 0.40454 | 0.68166 | 0.171 | 0.2  | 1 | HC_vs_MS.NoTrt_F |
| FCHO2       | 0.40497 | -0.2802 | 0.353 | 0.39 | 1 | HC_vs_MS.NoTrt_F |
| KIF19       | 0.40587 | -0.5643 | 0.425 | 0.45 | 1 | HC_vs_MS.NoTrt_F |
| ITGA11      | 0.40594 | 0.69783 | 0.708 | 0.7  | 1 | HC_vs_MS.NoTrt_F |
| PRKAG1      | 0.40594 | 0.5254  | 0.63  | 0.68 | 1 | HC_vs_MS.NoTrt_F |
| PTDSS2      | 0.40655 | 2.39343 | 0.107 | 0.14 | 1 | HC_vs_MS.NoTrt_F |
| OBSCN       | 0.40668 | 0.28756 | 0.269 | 0.3  | 1 | HC_vs_MS.NoTrt_F |
| RP11-793H1  | 0.40675 | 0.36847 | 0.329 | 0.37 | 1 | HC_vs_MS.NoTrt_F |
| BBS2        | 0.40683 | 0.31059 | 0.737 | 0.77 | 1 | HC_vs_MS.NoTrt_F |
| INO80D      | 0.40701 | 0.35756 | 0.483 | 0.54 | 1 | HC_vs_MS.NoTrt_F |
| ZNF165      | 0.40703 | 0.91898 | 0.09  | 0.12 | 1 | HC_vs_MS.NoTrt_F |
| TBC1D8      | 0.40709 | 0.29652 | 0.445 | 0.5  | 1 | HC_vs_MS.NoTrt_F |
| FBLN1       | 0.40743 | 0.58333 | 0.188 | 0.23 | 1 | HC_vs_MS.NoTrt_F |
| FOXP4       | 0.40745 | 0.4137  | 0.422 | 0.44 | 1 | HC_vs_MS.NoTrt_F |
| GRK5        | 0.40786 | 0.46373 | 0.22  | 0.26 | 1 | HC_vs_MS.NoTrt_F |
| PRPF40B     | 0.40811 | 0.60806 | 0.387 | 0.36 | 1 | HC_vs_MS.NoTrt_F |

|            |         |         |       |      |   |                  |
|------------|---------|---------|-------|------|---|------------------|
| NOL11      | 0.4096  | -0.2812 | 0.578 | 0.56 | 1 | HC_vs_MS.NoTrt_F |
| RSAD2      | 0.40982 | -0.6274 | 0.425 | 0.39 | 1 | HC_vs_MS.NoTrt_F |
| PICK1      | 0.40999 | 1.40396 | 0.52  | 0.5  | 1 | HC_vs_MS.NoTrt_F |
| LRRC2      | 0.41    | -0.3587 | 0.795 | 0.79 | 1 | HC_vs_MS.NoTrt_F |
| HSD17B4    | 0.4102  | -0.3166 | 0.656 | 0.7  | 1 | HC_vs_MS.NoTrt_F |
| COMMD9     | 0.41047 | -0.4989 | 0.503 | 0.46 | 1 | HC_vs_MS.NoTrt_F |
| CENPF      | 0.41052 | 0.35585 | 0.431 | 0.49 | 1 | HC_vs_MS.NoTrt_F |
| UVSSA      | 0.41108 | 0.2623  | 0.824 | 0.81 | 1 | HC_vs_MS.NoTrt_F |
| MDGA1      | 0.41143 | 0.56339 | 0.087 | 0.11 | 1 | HC_vs_MS.NoTrt_F |
| MAML1      | 0.41173 | 0.71037 | 0.208 | 0.25 | 1 | HC_vs_MS.NoTrt_F |
| CYB5R2     | 0.41176 | 0.62375 | 0.575 | 0.53 | 1 | HC_vs_MS.NoTrt_F |
| PWP2       | 0.41206 | 0.34238 | 0.124 | 0.16 | 1 | HC_vs_MS.NoTrt_F |
| ELL2       | 0.41306 | 0.37408 | 0.09  | 0.12 | 1 | HC_vs_MS.NoTrt_F |
| EID2B      | 0.41347 | 1.09578 | 0.523 | 0.57 | 1 | HC_vs_MS.NoTrt_F |
| SSC5D      | 0.41359 | -0.3635 | 0.092 | 0.12 | 1 | HC_vs_MS.NoTrt_F |
| PIK3R3     | 0.41369 | 0.37276 | 0.569 | 0.65 | 1 | HC_vs_MS.NoTrt_F |
| HIPK1      | 0.41374 | 0.80451 | 0.263 | 0.31 | 1 | HC_vs_MS.NoTrt_F |
| CCDC124    | 0.41388 | 0.37641 | 0.488 | 0.54 | 1 | HC_vs_MS.NoTrt_F |
| ING5       | 0.41457 | -0.2627 | 0.948 | 0.94 | 1 | HC_vs_MS.NoTrt_F |
| DNAH11     | 0.41481 | 0.32739 | 0.329 | 0.4  | 1 | HC_vs_MS.NoTrt_F |
| PLOD2      | 0.41483 | 0.42662 | 0.439 | 0.45 | 1 | HC_vs_MS.NoTrt_F |
| AC240274.1 | 0.4153  | 0.65781 | 0.283 | 0.33 | 1 | HC_vs_MS.NoTrt_F |
| BHMT       | 0.41552 | 0.3391  | 0.595 | 0.57 | 1 | HC_vs_MS.NoTrt_F |
| SOWAHC     | 0.41572 | -0.3156 | 0.514 | 0.55 | 1 | HC_vs_MS.NoTrt_F |
| TMEM44     | 0.41591 | -0.3984 | 0.679 | 0.64 | 1 | HC_vs_MS.NoTrt_F |
| OAZ2       | 0.4162  | -0.5297 | 0.815 | 0.85 | 1 | HC_vs_MS.NoTrt_F |
| TMEM71     | 0.41641 | 1.32261 | 0.116 | 0.14 | 1 | HC_vs_MS.NoTrt_F |
| NTAN1      | 0.41668 | 0.27078 | 0.772 | 0.77 | 1 | HC_vs_MS.NoTrt_F |
| TMEM80     | 0.41713 | 0.50516 | 0.552 | 0.6  | 1 | HC_vs_MS.NoTrt_F |
| CARD16     | 0.41732 | 0.46533 | 0.361 | 0.41 | 1 | HC_vs_MS.NoTrt_F |
| MRPL22     | 0.41734 | 0.56071 | 0.28  | 0.32 | 1 | HC_vs_MS.NoTrt_F |
| GON4L      | 0.41757 | 0.41235 | 0.887 | 0.88 | 1 | HC_vs_MS.NoTrt_F |
| CYP3A5     | 0.41767 | 0.26553 | 0.884 | 0.93 | 1 | HC_vs_MS.NoTrt_F |
| CHST3      | 0.41798 | 1.18331 | 0.188 | 0.22 | 1 | HC_vs_MS.NoTrt_F |
| ZNF335     | 0.41826 | 0.47853 | 0.376 | 0.41 | 1 | HC_vs_MS.NoTrt_F |
| RBMXL1     | 0.41861 | 0.38054 | 0.153 | 0.18 | 1 | HC_vs_MS.NoTrt_F |
| PLXNA3     | 0.41872 | 0.72061 | 0.861 | 0.85 | 1 | HC_vs_MS.NoTrt_F |
| CPNE2      | 0.41877 | -0.4716 | 0.477 | 0.47 | 1 | HC_vs_MS.NoTrt_F |
| PQLC1      | 0.41888 | 0.29741 | 0.569 | 0.54 | 1 | HC_vs_MS.NoTrt_F |
| LINC00116  | 0.41894 | 0.61731 | 0.176 | 0.21 | 1 | HC_vs_MS.NoTrt_F |

|            |         |         |       |      |   |                  |
|------------|---------|---------|-------|------|---|------------------|
| TOMM70     | 0.419   | 0.65197 | 0.188 | 0.22 | 1 | HC_vs_MS.NoTrt_F |
| CA5B       | 0.41919 | 0.67097 | 0.879 | 0.9  | 1 | HC_vs_MS.NoTrt_F |
| RBM33      | 0.41922 | 0.9     | 0.277 | 0.33 | 1 | HC_vs_MS.NoTrt_F |
| BACE2      | 0.41956 | 0.73508 | 0.306 | 0.33 | 1 | HC_vs_MS.NoTrt_F |
| PCDHB16    | 0.42031 | 0.66723 | 0.358 | 0.39 | 1 | HC_vs_MS.NoTrt_F |
| LSM5       | 0.42105 | 0.64742 | 0.561 | 0.5  | 1 | HC_vs_MS.NoTrt_F |
| SLC35E2    | 0.42114 | 0.5373  | 0.477 | 0.52 | 1 | HC_vs_MS.NoTrt_F |
| FAHD1      | 0.42115 | -0.4921 | 0.358 | 0.39 | 1 | HC_vs_MS.NoTrt_F |
| RP3-461F17 | 0.42135 | 0.80294 | 0.283 | 0.32 | 1 | HC_vs_MS.NoTrt_F |
| STARD10    | 0.42142 | 0.33245 | 0.855 | 0.88 | 1 | HC_vs_MS.NoTrt_F |
| ABHD2      | 0.42142 | -0.252  | 0.659 | 0.69 | 1 | HC_vs_MS.NoTrt_F |
| CHST14     | 0.42146 | 0.31997 | 0.303 | 0.28 | 1 | HC_vs_MS.NoTrt_F |
| NTPCR      | 0.42169 | 0.44148 | 0.468 | 0.5  | 1 | HC_vs_MS.NoTrt_F |
| C7orf50    | 0.42171 | 0.57471 | 0.355 | 0.39 | 1 | HC_vs_MS.NoTrt_F |
| CKAP2L     | 0.42226 | 0.31618 | 0.512 | 0.57 | 1 | HC_vs_MS.NoTrt_F |
| HN1L       | 0.42254 | 0.68678 | 0.416 | 0.39 | 1 | HC_vs_MS.NoTrt_F |
| TXNL4B     | 0.42265 | -0.4468 | 0.41  | 0.43 | 1 | HC_vs_MS.NoTrt_F |
| SUPT6H     | 0.42315 | 0.60359 | 0.679 | 0.7  | 1 | HC_vs_MS.NoTrt_F |
| GPR35      | 0.42409 | -1.0018 | 0.321 | 0.33 | 1 | HC_vs_MS.NoTrt_F |
| AHCYL2     | 0.42474 | 1.68089 | 0.194 | 0.23 | 1 | HC_vs_MS.NoTrt_F |
| CACNG8     | 0.42479 | 0.38462 | 0.835 | 0.74 | 1 | HC_vs_MS.NoTrt_F |
| TAOK2      | 0.42525 | -0.6502 | 0.179 | 0.2  | 1 | HC_vs_MS.NoTrt_F |
| ZADH2      | 0.42529 | 0.26771 | 0.861 | 0.83 | 1 | HC_vs_MS.NoTrt_F |
| MME        | 0.4254  | 0.45374 | 0.48  | 0.52 | 1 | HC_vs_MS.NoTrt_F |
| PRR29      | 0.4254  | -0.3329 | 0.26  | 0.28 | 1 | HC_vs_MS.NoTrt_F |
| RBM5       | 0.42572 | 0.36926 | 0.861 | 0.87 | 1 | HC_vs_MS.NoTrt_F |
| ZNF670     | 0.42577 | 1.14007 | 0.205 | 0.24 | 1 | HC_vs_MS.NoTrt_F |
| TAL1       | 0.42614 | 0.5617  | 0.26  | 0.23 | 1 | HC_vs_MS.NoTrt_F |
| SNTN       | 0.42692 | 0.31287 | 0.344 | 0.38 | 1 | HC_vs_MS.NoTrt_F |
| ZNF773     | 0.42708 | 0.39929 | 0.662 | 0.6  | 1 | HC_vs_MS.NoTrt_F |
| CSAD       | 0.42734 | 0.2976  | 0.858 | 0.86 | 1 | HC_vs_MS.NoTrt_F |
| BBS5       | 0.42785 | 0.2826  | 0.361 | 0.33 | 1 | HC_vs_MS.NoTrt_F |
| MAPKBP1    | 0.42786 | 0.98174 | 0.552 | 0.51 | 1 | HC_vs_MS.NoTrt_F |
| FBXL22     | 0.4279  | 1.12964 | 0.13  | 0.16 | 1 | HC_vs_MS.NoTrt_F |
| ZZZ3       | 0.42865 | 0.38926 | 0.824 | 0.82 | 1 | HC_vs_MS.NoTrt_F |
| KLF9       | 0.42874 | 1.50547 | 0.09  | 0.12 | 1 | HC_vs_MS.NoTrt_F |
| THNSL1     | 0.42893 | -0.3086 | 0.153 | 0.19 | 1 | HC_vs_MS.NoTrt_F |
| SACS       | 0.4293  | 0.38756 | 0.153 | 0.18 | 1 | HC_vs_MS.NoTrt_F |
| HCST       | 0.42959 | 0.35157 | 0.434 | 0.54 | 1 | HC_vs_MS.NoTrt_F |
| TRIB3      | 0.42983 | -0.416  | 0.121 | 0.15 | 1 | HC_vs_MS.NoTrt_F |

|            |         |         |       |      |   |                  |
|------------|---------|---------|-------|------|---|------------------|
| LIN7B      | 0.43098 | -0.5914 | 0.338 | 0.37 | 1 | HC_vs_MS.NoTrt_F |
| RLF        | 0.43132 | 0.46712 | 0.275 | 0.32 | 1 | HC_vs_MS.NoTrt_F |
| ZNF441     | 0.43143 | 0.33062 | 0.197 | 0.23 | 1 | HC_vs_MS.NoTrt_F |
| PEX1       | 0.43144 | 0.48379 | 0.792 | 0.79 | 1 | HC_vs_MS.NoTrt_F |
| GPR65      | 0.4319  | 0.70479 | 0.335 | 0.37 | 1 | HC_vs_MS.NoTrt_F |
| ZNF675     | 0.43194 | 0.51779 | 0.954 | 0.96 | 1 | HC_vs_MS.NoTrt_F |
| SEC31B     | 0.43213 | 0.27344 | 0.451 | 0.49 | 1 | HC_vs_MS.NoTrt_F |
| DENND5A    | 0.43224 | 0.42559 | 0.275 | 0.32 | 1 | HC_vs_MS.NoTrt_F |
| NBPF12     | 0.43317 | 0.64003 | 0.347 | 0.38 | 1 | HC_vs_MS.NoTrt_F |
| PALM2      | 0.43352 | 0.26248 | 0.497 | 0.48 | 1 | HC_vs_MS.NoTrt_F |
| RALGAPA2   | 0.43396 | 1.20069 | 0.205 | 0.25 | 1 | HC_vs_MS.NoTrt_F |
| ANKRD42    | 0.43424 | 0.5436  | 0.442 | 0.48 | 1 | HC_vs_MS.NoTrt_F |
| AKAP8      | 0.4349  | 0.30895 | 0.422 | 0.45 | 1 | HC_vs_MS.NoTrt_F |
| NSUN4      | 0.43508 | 0.68611 | 0.806 | 0.81 | 1 | HC_vs_MS.NoTrt_F |
| ZC3HC1     | 0.43517 | 0.40957 | 0.517 | 0.56 | 1 | HC_vs_MS.NoTrt_F |
| FERMT2     | 0.43543 | 0.26392 | 0.569 | 0.53 | 1 | HC_vs_MS.NoTrt_F |
| TPRG1      | 0.4355  | 0.63568 | 0.263 | 0.3  | 1 | HC_vs_MS.NoTrt_F |
| SF1        | 0.43593 | 0.49243 | 0.604 | 0.72 | 1 | HC_vs_MS.NoTrt_F |
| RIN1       | 0.43671 | 1.11661 | 0.199 | 0.23 | 1 | HC_vs_MS.NoTrt_F |
| TECPR2     | 0.43676 | 1.81942 | 0.338 | 0.37 | 1 | HC_vs_MS.NoTrt_F |
| SPACA9     | 0.43736 | -0.3444 | 0.685 | 0.64 | 1 | HC_vs_MS.NoTrt_F |
| SWAP70     | 0.43762 | -1.4823 | 0.483 | 0.49 | 1 | HC_vs_MS.NoTrt_F |
| NCBP1      | 0.43804 | 0.54006 | 0.688 | 0.7  | 1 | HC_vs_MS.NoTrt_F |
| CARD6      | 0.43861 | -0.6439 | 0.552 | 0.5  | 1 | HC_vs_MS.NoTrt_F |
| TM4SF19    | 0.43937 | 0.28502 | 0.616 | 0.62 | 1 | HC_vs_MS.NoTrt_F |
| PPT2       | 0.44012 | 0.29619 | 0.604 | 0.56 | 1 | HC_vs_MS.NoTrt_F |
| HNRNPA1L2  | 0.44015 | -0.5219 | 0.341 | 0.38 | 1 | HC_vs_MS.NoTrt_F |
| SIRT5      | 0.44061 | 0.76966 | 0.879 | 0.86 | 1 | HC_vs_MS.NoTrt_F |
| ITGB2      | 0.44127 | 0.57819 | 0.685 | 0.74 | 1 | HC_vs_MS.NoTrt_F |
| TNS4       | 0.44131 | 0.51172 | 0.572 | 0.57 | 1 | HC_vs_MS.NoTrt_F |
| NBPF19     | 0.44141 | 1.15965 | 0.474 | 0.46 | 1 | HC_vs_MS.NoTrt_F |
| RHBDD1     | 0.44158 | 0.301   | 0.422 | 0.44 | 1 | HC_vs_MS.NoTrt_F |
| CITED2     | 0.44211 | 1.28519 | 0.249 | 0.3  | 1 | HC_vs_MS.NoTrt_F |
| MLF1       | 0.44266 | 0.91724 | 0.367 | 0.41 | 1 | HC_vs_MS.NoTrt_F |
| TRHDE      | 0.44274 | 0.36543 | 0.283 | 0.26 | 1 | HC_vs_MS.NoTrt_F |
| RP11-437B1 | 0.44312 | 0.44247 | 0.639 | 0.68 | 1 | HC_vs_MS.NoTrt_F |
| LZTR1      | 0.44343 | -0.4505 | 0.332 | 0.34 | 1 | HC_vs_MS.NoTrt_F |
| PRKCI      | 0.4442  | -0.4023 | 0.419 | 0.42 | 1 | HC_vs_MS.NoTrt_F |
| FEZ1       | 0.44422 | 0.25138 | 0.621 | 0.6  | 1 | HC_vs_MS.NoTrt_F |
| ABHD14A    | 0.44428 | 0.28729 | 0.564 | 0.59 | 1 | HC_vs_MS.NoTrt_F |

|            |         |         |       |      |   |                  |
|------------|---------|---------|-------|------|---|------------------|
| ZMIZ1      | 0.44433 | 0.92277 | 0.162 | 0.19 | 1 | HC_vs_MS.NoTrt_F |
| MCOLN3     | 0.4444  | 0.51413 | 0.517 | 0.56 | 1 | HC_vs_MS.NoTrt_F |
| CHP1       | 0.44445 | 0.44916 | 0.806 | 0.82 | 1 | HC_vs_MS.NoTrt_F |
| NFKBIZ     | 0.4452  | 0.51919 | 0.445 | 0.5  | 1 | HC_vs_MS.NoTrt_F |
| CTTNBP2NL  | 0.44522 | 0.61822 | 0.503 | 0.54 | 1 | HC_vs_MS.NoTrt_F |
| MRPL12     | 0.44529 | 1.91308 | 0.095 | 0.12 | 1 | HC_vs_MS.NoTrt_F |
| NCAPD2     | 0.44569 | -0.3514 | 0.454 | 0.46 | 1 | HC_vs_MS.NoTrt_F |
| ZNF846     | 0.44582 | 0.37839 | 0.494 | 0.53 | 1 | HC_vs_MS.NoTrt_F |
| ELN        | 0.44679 | 0.40462 | 0.72  | 0.74 | 1 | HC_vs_MS.NoTrt_F |
| NUMBL      | 0.44736 | 0.37756 | 0.627 | 0.58 | 1 | HC_vs_MS.NoTrt_F |
| POGZ       | 0.44778 | 0.41534 | 0.876 | 0.86 | 1 | HC_vs_MS.NoTrt_F |
| MKRN3      | 0.4478  | 0.89173 | 0.587 | 0.54 | 1 | HC_vs_MS.NoTrt_F |
| YARS       | 0.44788 | -0.2593 | 0.89  | 0.9  | 1 | HC_vs_MS.NoTrt_F |
| GLT8D1     | 0.44789 | -0.5477 | 0.312 | 0.33 | 1 | HC_vs_MS.NoTrt_F |
| TIMM50     | 0.44856 | 0.32022 | 0.98  | 0.99 | 1 | HC_vs_MS.NoTrt_F |
| NBPF1      | 0.44857 | 0.56478 | 0.283 | 0.33 | 1 | HC_vs_MS.NoTrt_F |
| SSPO       | 0.44934 | 0.28795 | 0.199 | 0.23 | 1 | HC_vs_MS.NoTrt_F |
| LYZ        | 0.44935 | 1.4033  | 0.503 | 0.48 | 1 | HC_vs_MS.NoTrt_F |
| MCM3AP     | 0.44948 | 0.36467 | 0.546 | 0.56 | 1 | HC_vs_MS.NoTrt_F |
| MKLN1      | 0.44981 | 0.63759 | 0.665 | 0.66 | 1 | HC_vs_MS.NoTrt_F |
| SEPN1      | 0.44987 | 0.35359 | 0.442 | 0.43 | 1 | HC_vs_MS.NoTrt_F |
| MTUS1      | 0.44988 | 0.51799 | 0.41  | 0.44 | 1 | HC_vs_MS.NoTrt_F |
| RBKS       | 0.45003 | 0.66139 | 0.145 | 0.18 | 1 | HC_vs_MS.NoTrt_F |
| SRRM2      | 0.45009 | 0.34511 | 0.754 | 0.79 | 1 | HC_vs_MS.NoTrt_F |
| CH507-42P1 | 0.45051 | 0.99735 | 0.257 | 0.3  | 1 | HC_vs_MS.NoTrt_F |
| ICMT       | 0.45057 | -0.6872 | 0.74  | 0.66 | 1 | HC_vs_MS.NoTrt_F |
| EIF2AK2    | 0.45066 | 0.28417 | 0.829 | 0.85 | 1 | HC_vs_MS.NoTrt_F |
| IL18       | 0.45133 | 0.84965 | 0.491 | 0.53 | 1 | HC_vs_MS.NoTrt_F |
| MMAB       | 0.4516  | -0.351  | 0.717 | 0.71 | 1 | HC_vs_MS.NoTrt_F |
| RSPRY1     | 0.45166 | 0.37184 | 0.416 | 0.46 | 1 | HC_vs_MS.NoTrt_F |
| CXCR4      | 0.45171 | 0.31411 | 0.37  | 0.44 | 1 | HC_vs_MS.NoTrt_F |
| LPIN3      | 0.45209 | -0.26   | 0.552 | 0.49 | 1 | HC_vs_MS.NoTrt_F |
| ESCO1      | 0.45239 | 0.33446 | 0.439 | 0.51 | 1 | HC_vs_MS.NoTrt_F |
| C8orf44    | 0.45259 | -0.3604 | 0.526 | 0.58 | 1 | HC_vs_MS.NoTrt_F |
| HBS1L      | 0.45293 | 0.2847  | 0.618 | 0.68 | 1 | HC_vs_MS.NoTrt_F |
| RAD1       | 0.45331 | 0.26568 | 0.717 | 0.74 | 1 | HC_vs_MS.NoTrt_F |
| MYH10      | 0.45411 | 0.67354 | 0.147 | 0.17 | 1 | HC_vs_MS.NoTrt_F |
| BHLHB9     | 0.45416 | -0.2797 | 0.436 | 0.48 | 1 | HC_vs_MS.NoTrt_F |
| EML4       | 0.45427 | 0.26177 | 0.777 | 0.82 | 1 | HC_vs_MS.NoTrt_F |
| ZBTB40     | 0.45532 | 0.29499 | 0.526 | 0.48 | 1 | HC_vs_MS.NoTrt_F |



|          |         |         |       |      |   |                  |
|----------|---------|---------|-------|------|---|------------------|
| FUS      | 0.45565 | 0.2757  | 0.85  | 0.9  | 1 | HC_vs_MS.NoTrt_F |
| ST3GAL2  | 0.45664 | 0.37423 | 0.962 | 0.99 | 1 | HC_vs_MS.NoTrt_F |
| PDRG1    | 0.45721 | -0.2707 | 0.162 | 0.18 | 1 | HC_vs_MS.NoTrt_F |
| CCNK     | 0.45809 | 0.92668 | 0.298 | 0.35 | 1 | HC_vs_MS.NoTrt_F |
| COL24A1  | 0.45854 | 1.28442 | 0.092 | 0.12 | 1 | HC_vs_MS.NoTrt_F |
| ZCCHC7   | 0.45857 | 0.68871 | 0.332 | 0.39 | 1 | HC_vs_MS.NoTrt_F |
| RND1     | 0.45863 | 0.28871 | 0.613 | 0.62 | 1 | HC_vs_MS.NoTrt_F |
| PLA2G12A | 0.45884 | 0.37309 | 0.679 | 0.72 | 1 | HC_vs_MS.NoTrt_F |
| GTF2E1   | 0.45937 | 0.85951 | 0.295 | 0.33 | 1 | HC_vs_MS.NoTrt_F |
| TNS2     | 0.4599  | 1.31201 | 0.39  | 0.41 | 1 | HC_vs_MS.NoTrt_F |
| HLA-DOA  | 0.45996 | -0.468  | 0.743 | 0.67 | 1 | HC_vs_MS.NoTrt_F |
| DHRS1    | 0.46021 | -0.3789 | 0.671 | 0.66 | 1 | HC_vs_MS.NoTrt_F |
| NCF1     | 0.46064 | 2.31063 | 0.543 | 0.6  | 1 | HC_vs_MS.NoTrt_F |
| VPS50    | 0.46102 | -0.4194 | 0.665 | 0.64 | 1 | HC_vs_MS.NoTrt_F |
| QKI      | 0.46111 | 0.34855 | 0.448 | 0.42 | 1 | HC_vs_MS.NoTrt_F |
| SEMA5A   | 0.4615  | 0.60307 | 0.39  | 0.42 | 1 | HC_vs_MS.NoTrt_F |
| RGPD6    | 0.46229 | 0.39279 | 0.685 | 0.69 | 1 | HC_vs_MS.NoTrt_F |
| C19orf52 | 0.46239 | 0.26956 | 0.353 | 0.38 | 1 | HC_vs_MS.NoTrt_F |
| RGS2     | 0.4624  | 1.47429 | 0.202 | 0.24 | 1 | HC_vs_MS.NoTrt_F |
| HLA-DRA  | 0.46305 | 0.29981 | 0.298 | 0.26 | 1 | HC_vs_MS.NoTrt_F |
| POMK     | 0.46318 | -0.4797 | 0.618 | 0.66 | 1 | HC_vs_MS.NoTrt_F |
| PLOD3    | 0.46342 | 0.68387 | 0.78  | 0.78 | 1 | HC_vs_MS.NoTrt_F |
| USP16    | 0.46547 | 0.55233 | 0.529 | 0.58 | 1 | HC_vs_MS.NoTrt_F |
| LRRK1    | 0.46569 | 0.30602 | 0.85  | 0.86 | 1 | HC_vs_MS.NoTrt_F |
| IFT122   | 0.46624 | -0.3255 | 0.916 | 0.93 | 1 | HC_vs_MS.NoTrt_F |
| RDH11    | 0.4663  | -0.2631 | 0.558 | 0.55 | 1 | HC_vs_MS.NoTrt_F |
| HAGH     | 0.46674 | -0.2933 | 0.783 | 0.79 | 1 | HC_vs_MS.NoTrt_F |
| ADRA1A   | 0.46692 | 0.34032 | 0.618 | 0.62 | 1 | HC_vs_MS.NoTrt_F |
| CD93     | 0.46734 | 0.65183 | 0.361 | 0.33 | 1 | HC_vs_MS.NoTrt_F |
| CCNT1    | 0.4674  | 1.14591 | 0.249 | 0.29 | 1 | HC_vs_MS.NoTrt_F |
| FBXO6    | 0.46744 | 0.68988 | 0.697 | 0.65 | 1 | HC_vs_MS.NoTrt_F |
| TRIM22   | 0.46757 | 0.27948 | 0.934 | 0.91 | 1 | HC_vs_MS.NoTrt_F |
| MCM5     | 0.46763 | 0.53979 | 0.263 | 0.29 | 1 | HC_vs_MS.NoTrt_F |
| CDK16    | 0.46822 | 0.35162 | 0.254 | 0.29 | 1 | HC_vs_MS.NoTrt_F |
| ACTR10   | 0.46872 | -0.5364 | 0.783 | 0.82 | 1 | HC_vs_MS.NoTrt_F |
| TMEM204  | 0.46886 | 0.299   | 0.234 | 0.25 | 1 | HC_vs_MS.NoTrt_F |
| COPS7B   | 0.46921 | 0.5565  | 0.769 | 0.85 | 1 | HC_vs_MS.NoTrt_F |
| SRGN     | 0.46978 | 0.36217 | 0.642 | 0.7  | 1 | HC_vs_MS.NoTrt_F |
| APEX2    | 0.47006 | 0.61702 | 0.402 | 0.37 | 1 | HC_vs_MS.NoTrt_F |
| PXMP4    | 0.47019 | 0.34702 | 0.876 | 0.87 | 1 | HC_vs_MS.NoTrt_F |

|            |         |         |       |      |   |                  |
|------------|---------|---------|-------|------|---|------------------|
| LEPR       | 0.47035 | 0.93985 | 0.373 | 0.33 | 1 | HC_vs_MS.NoTrt_F |
| RBMS3      | 0.47083 | 0.59825 | 0.697 | 0.78 | 1 | HC_vs_MS.NoTrt_F |
| TEX2       | 0.47097 | 0.98453 | 0.72  | 0.73 | 1 | HC_vs_MS.NoTrt_F |
| SH3YL1     | 0.47098 | -0.7612 | 0.757 | 0.71 | 1 | HC_vs_MS.NoTrt_F |
| RNF24      | 0.47107 | 0.44932 | 0.581 | 0.61 | 1 | HC_vs_MS.NoTrt_F |
| ZFP41      | 0.47175 | 1.11945 | 0.168 | 0.19 | 1 | HC_vs_MS.NoTrt_F |
| ANKMY1     | 0.47196 | 0.9392  | 0.462 | 0.44 | 1 | HC_vs_MS.NoTrt_F |
| TMEM231    | 0.47264 | 0.34441 | 0.766 | 0.82 | 1 | HC_vs_MS.NoTrt_F |
| LEO1       | 0.47305 | 0.34939 | 0.61  | 0.56 | 1 | HC_vs_MS.NoTrt_F |
| GNLY       | 0.47355 | 2.88652 | 0.312 | 0.34 | 1 | HC_vs_MS.NoTrt_F |
| B9D2       | 0.47382 | 0.47701 | 0.393 | 0.43 | 1 | HC_vs_MS.NoTrt_F |
| RFX2       | 0.47391 | 0.28949 | 0.514 | 0.53 | 1 | HC_vs_MS.NoTrt_F |
| KLHL36     | 0.47399 | 0.35642 | 0.688 | 0.67 | 1 | HC_vs_MS.NoTrt_F |
| TYW3       | 0.47464 | 0.69823 | 0.503 | 0.49 | 1 | HC_vs_MS.NoTrt_F |
| YIPF6      | 0.4754  | 0.5233  | 0.908 | 0.89 | 1 | HC_vs_MS.NoTrt_F |
| ZNF354A    | 0.47542 | 0.45837 | 0.251 | 0.28 | 1 | HC_vs_MS.NoTrt_F |
| GNB1       | 0.47559 | 0.75376 | 0.329 | 0.35 | 1 | HC_vs_MS.NoTrt_F |
| UTP15      | 0.47597 | -0.9136 | 0.367 | 0.39 | 1 | HC_vs_MS.NoTrt_F |
| ERI2       | 0.476   | 0.90099 | 0.197 | 0.23 | 1 | HC_vs_MS.NoTrt_F |
| ZC3H12D    | 0.47674 | 0.31502 | 0.876 | 0.91 | 1 | HC_vs_MS.NoTrt_F |
| CLIP2      | 0.47708 | -0.2579 | 0.405 | 0.37 | 1 | HC_vs_MS.NoTrt_F |
| SLCO4C1    | 0.47802 | 0.26358 | 0.188 | 0.22 | 1 | HC_vs_MS.NoTrt_F |
| CENPN      | 0.47812 | 0.35509 | 0.217 | 0.25 | 1 | HC_vs_MS.NoTrt_F |
| HIST2H2AA3 | 0.47814 | 0.98273 | 0.124 | 0.16 | 1 | HC_vs_MS.NoTrt_F |
| GABBR1     | 0.47839 | 0.90327 | 0.208 | 0.24 | 1 | HC_vs_MS.NoTrt_F |
| NINJ1      | 0.47852 | 0.46686 | 0.613 | 0.65 | 1 | HC_vs_MS.NoTrt_F |
| MAPKAPK3   | 0.47871 | 0.91418 | 0.24  | 0.28 | 1 | HC_vs_MS.NoTrt_F |
| ISG20L2    | 0.47873 | 0.35687 | 0.85  | 0.87 | 1 | HC_vs_MS.NoTrt_F |
| RAB6A      | 0.4791  | 0.29201 | 0.436 | 0.49 | 1 | HC_vs_MS.NoTrt_F |
| MTF1       | 0.47916 | -0.5392 | 0.327 | 0.35 | 1 | HC_vs_MS.NoTrt_F |
| ANKRD12    | 0.4792  | 0.26828 | 0.867 | 0.87 | 1 | HC_vs_MS.NoTrt_F |
| GRB10      | 0.47957 | 1.00248 | 0.341 | 0.32 | 1 | HC_vs_MS.NoTrt_F |
| GDE1       | 0.47966 | 0.52942 | 0.315 | 0.34 | 1 | HC_vs_MS.NoTrt_F |
| ST7L       | 0.47989 | 0.31237 | 0.529 | 0.48 | 1 | HC_vs_MS.NoTrt_F |
| SERPINH1   | 0.47994 | -0.2612 | 0.39  | 0.41 | 1 | HC_vs_MS.NoTrt_F |
| HLA-DRB5   | 0.48004 | -1.9688 | 0.246 | 0.21 | 1 | HC_vs_MS.NoTrt_F |
| GIGYF2     | 0.48046 | -0.4166 | 0.925 | 0.92 | 1 | HC_vs_MS.NoTrt_F |
| PLPP3      | 0.48057 | 0.74996 | 0.315 | 0.33 | 1 | HC_vs_MS.NoTrt_F |
| CYTH4      | 0.48129 | -0.2766 | 0.844 | 0.82 | 1 | HC_vs_MS.NoTrt_F |
| ANKRD17    | 0.48136 | 0.45338 | 0.295 | 0.34 | 1 | HC_vs_MS.NoTrt_F |

|          |         |         |       |      |   |                  |
|----------|---------|---------|-------|------|---|------------------|
| SLC4A5   | 0.48148 | 0.38411 | 0.827 | 0.85 | 1 | HC_vs_MS.NoTrt_F |
| ZNF551   | 0.48177 | 1.18321 | 0.543 | 0.56 | 1 | HC_vs_MS.NoTrt_F |
| SC5D     | 0.48264 | 0.44323 | 0.679 | 0.63 | 1 | HC_vs_MS.NoTrt_F |
| FAF2     | 0.48264 | 0.6293  | 0.191 | 0.22 | 1 | HC_vs_MS.NoTrt_F |
| FAM98B   | 0.48303 | 0.28702 | 0.523 | 0.5  | 1 | HC_vs_MS.NoTrt_F |
| ZNF260   | 0.48304 | -0.2741 | 0.627 | 0.65 | 1 | HC_vs_MS.NoTrt_F |
| RILPL1   | 0.48331 | 0.3287  | 0.954 | 0.98 | 1 | HC_vs_MS.NoTrt_F |
| RER1     | 0.48371 | 0.72322 | 0.257 | 0.3  | 1 | HC_vs_MS.NoTrt_F |
| RNFT1    | 0.48399 | 0.38131 | 0.442 | 0.45 | 1 | HC_vs_MS.NoTrt_F |
| BRAT1    | 0.48419 | 0.47527 | 0.338 | 0.37 | 1 | HC_vs_MS.NoTrt_F |
| ZRANB3   | 0.48421 | 0.3103  | 0.737 | 0.76 | 1 | HC_vs_MS.NoTrt_F |
| UST      | 0.48461 | 0.36905 | 0.37  | 0.33 | 1 | HC_vs_MS.NoTrt_F |
| SAA2     | 0.48505 | 0.25794 | 0.457 | 0.41 | 1 | HC_vs_MS.NoTrt_F |
| HERC2    | 0.4852  | 0.25821 | 0.91  | 0.91 | 1 | HC_vs_MS.NoTrt_F |
| TRPV1    | 0.48635 | 0.49158 | 0.477 | 0.54 | 1 | HC_vs_MS.NoTrt_F |
| FBXL4    | 0.48672 | 0.41672 | 0.546 | 0.58 | 1 | HC_vs_MS.NoTrt_F |
| RABAC1   | 0.48676 | 0.54408 | 0.283 | 0.33 | 1 | HC_vs_MS.NoTrt_F |
| RPP30    | 0.48756 | 0.47052 | 0.679 | 0.66 | 1 | HC_vs_MS.NoTrt_F |
| TOR4A    | 0.4878  | 0.409   | 0.254 | 0.28 | 1 | HC_vs_MS.NoTrt_F |
| SUDS3    | 0.48826 | -0.3129 | 0.841 | 0.81 | 1 | HC_vs_MS.NoTrt_F |
| USP33    | 0.48828 | 0.2686  | 0.965 | 0.95 | 1 | HC_vs_MS.NoTrt_F |
| ABCB9    | 0.48834 | 0.42904 | 0.85  | 0.9  | 1 | HC_vs_MS.NoTrt_F |
| ARRB1    | 0.48852 | 0.67118 | 0.763 | 0.81 | 1 | HC_vs_MS.NoTrt_F |
| NPIPB3   | 0.48887 | 0.62245 | 0.777 | 0.83 | 1 | HC_vs_MS.NoTrt_F |
| MICU1    | 0.48887 | 0.36403 | 0.74  | 0.73 | 1 | HC_vs_MS.NoTrt_F |
| EXOGL    | 0.489   | 0.25839 | 0.561 | 0.58 | 1 | HC_vs_MS.NoTrt_F |
| MTAP     | 0.48907 | 0.53855 | 0.789 | 0.87 | 1 | HC_vs_MS.NoTrt_F |
| TUBG1    | 0.48926 | 1.16756 | 0.668 | 0.61 | 1 | HC_vs_MS.NoTrt_F |
| TSR2     | 0.48943 | -0.3452 | 0.46  | 0.46 | 1 | HC_vs_MS.NoTrt_F |
| CR1      | 0.48979 | 0.93842 | 0.618 | 0.57 | 1 | HC_vs_MS.NoTrt_F |
| SLC25A14 | 0.49045 | 0.86658 | 0.324 | 0.35 | 1 | HC_vs_MS.NoTrt_F |
| ANKEF1   | 0.49069 | -1.4581 | 0.269 | 0.29 | 1 | HC_vs_MS.NoTrt_F |
| OTUD4    | 0.49074 | 0.52941 | 0.699 | 0.71 | 1 | HC_vs_MS.NoTrt_F |
| CHCHD5   | 0.49148 | 0.65142 | 0.532 | 0.53 | 1 | HC_vs_MS.NoTrt_F |
| MAGED1   | 0.49165 | -0.3658 | 0.775 | 0.79 | 1 | HC_vs_MS.NoTrt_F |
| TRIM33   | 0.49178 | 0.40211 | 0.396 | 0.35 | 1 | HC_vs_MS.NoTrt_F |
| GOLPH3L  | 0.49192 | 0.65606 | 0.263 | 0.28 | 1 | HC_vs_MS.NoTrt_F |
| ZNF772   | 0.49195 | 0.37249 | 0.471 | 0.52 | 1 | HC_vs_MS.NoTrt_F |
| CRLF2    | 0.49219 | 1.03394 | 0.37  | 0.41 | 1 | HC_vs_MS.NoTrt_F |
| CLU      | 0.49284 | 0.85762 | 0.561 | 0.6  | 1 | HC_vs_MS.NoTrt_F |

|          |         |         |       |      |   |                  |
|----------|---------|---------|-------|------|---|------------------|
| FAM161A  | 0.49313 | 0.33594 | 0.725 | 0.73 | 1 | HC_vs_MS.NoTrt_F |
| SPIB     | 0.4933  | 0.28035 | 0.818 | 0.86 | 1 | HC_vs_MS.NoTrt_F |
| ACSS1    | 0.49339 | 0.61474 | 0.627 | 0.67 | 1 | HC_vs_MS.NoTrt_F |
| PTK2B    | 0.49354 | 0.56783 | 0.491 | 0.49 | 1 | HC_vs_MS.NoTrt_F |
| CCDC85C  | 0.49385 | 0.59366 | 0.477 | 0.47 | 1 | HC_vs_MS.NoTrt_F |
| DNAJB5   | 0.49434 | 0.39351 | 0.231 | 0.21 | 1 | HC_vs_MS.NoTrt_F |
| KLHDC10  | 0.4947  | -0.7439 | 0.436 | 0.4  | 1 | HC_vs_MS.NoTrt_F |
| PDE3A    | 0.49479 | -0.4139 | 0.246 | 0.28 | 1 | HC_vs_MS.NoTrt_F |
| MECR     | 0.49498 | -0.318  | 0.405 | 0.44 | 1 | HC_vs_MS.NoTrt_F |
| C22orf39 | 0.49499 | 0.37368 | 0.763 | 0.75 | 1 | HC_vs_MS.NoTrt_F |
| HIKESHI  | 0.4951  | 0.28597 | 0.532 | 0.57 | 1 | HC_vs_MS.NoTrt_F |
| RHOF     | 0.49524 | 0.27796 | 0.757 | 0.78 | 1 | HC_vs_MS.NoTrt_F |
| IFT74    | 0.49587 | 0.32032 | 0.465 | 0.49 | 1 | HC_vs_MS.NoTrt_F |
| MYO7A    | 0.49621 | 0.91252 | 0.361 | 0.41 | 1 | HC_vs_MS.NoTrt_F |
| NAA40    | 0.49651 | -0.3647 | 0.561 | 0.55 | 1 | HC_vs_MS.NoTrt_F |
| HACD3    | 0.4968  | -0.3551 | 0.821 | 0.81 | 1 | HC_vs_MS.NoTrt_F |
| MEGF8    | 0.49689 | 1.48569 | 0.532 | 0.54 | 1 | HC_vs_MS.NoTrt_F |
| PRKX     | 0.49722 | 0.30631 | 0.636 | 0.68 | 1 | HC_vs_MS.NoTrt_F |
| GSTM3    | 0.49726 | 0.74971 | 0.598 | 0.6  | 1 | HC_vs_MS.NoTrt_F |
| MAPRE2   | 0.49736 | 0.33988 | 0.338 | 0.39 | 1 | HC_vs_MS.NoTrt_F |
| TRAT1    | 0.49756 | 0.74881 | 0.249 | 0.24 | 1 | HC_vs_MS.NoTrt_F |
| SLIT1    | 0.49835 | 0.65344 | 0.277 | 0.32 | 1 | HC_vs_MS.NoTrt_F |
| CDT1     | 0.49853 | 0.3474  | 0.5   | 0.49 | 1 | HC_vs_MS.NoTrt_F |
| KCNRG    | 0.499   | 0.35161 | 0.425 | 0.46 | 1 | HC_vs_MS.NoTrt_F |
| GATS     | 0.49938 | -0.3737 | 0.393 | 0.41 | 1 | HC_vs_MS.NoTrt_F |
| MT-CO3   | 0.49944 | 0.29206 | 0.679 | 0.67 | 1 | HC_vs_MS.NoTrt_F |
| REPS1    | 0.4995  | 0.25754 | 0.662 | 0.72 | 1 | HC_vs_MS.NoTrt_F |
| TAB3     | 0.49952 | 0.68674 | 0.749 | 0.81 | 1 | HC_vs_MS.NoTrt_F |
| EMC2     | 0.4996  | 0.3939  | 0.517 | 0.54 | 1 | HC_vs_MS.NoTrt_F |
| DZIP1    | 0.5003  | 0.39705 | 0.393 | 0.35 | 1 | HC_vs_MS.NoTrt_F |
| TSPOAP1  | 0.50046 | 0.97045 | 0.321 | 0.29 | 1 | HC_vs_MS.NoTrt_F |
| IFITM1   | 0.50047 | 0.32851 | 0.546 | 0.66 | 1 | HC_vs_MS.NoTrt_F |
| KIF13A   | 0.50052 | 1.32119 | 0.364 | 0.35 | 1 | HC_vs_MS.NoTrt_F |
| CLNK     | 0.50084 | 0.29603 | 0.743 | 0.69 | 1 | HC_vs_MS.NoTrt_F |
| CERS4    | 0.50152 | 0.73517 | 0.659 | 0.64 | 1 | HC_vs_MS.NoTrt_F |
| GNG7     | 0.50196 | -0.5571 | 0.413 | 0.46 | 1 | HC_vs_MS.NoTrt_F |
| ADGRG1   | 0.50269 | 0.53656 | 0.749 | 0.72 | 1 | HC_vs_MS.NoTrt_F |
| GATC     | 0.50279 | 0.35916 | 0.604 | 0.6  | 1 | HC_vs_MS.NoTrt_F |
| FLNB     | 0.50285 | 0.77068 | 0.471 | 0.43 | 1 | HC_vs_MS.NoTrt_F |
| P3H2     | 0.50289 | 0.59593 | 0.517 | 0.56 | 1 | HC_vs_MS.NoTrt_F |

|          |         |         |       |      |   |                  |
|----------|---------|---------|-------|------|---|------------------|
| VCL      | 0.50294 | 0.97418 | 0.188 | 0.22 | 1 | HC_vs_MS.NoTrt_F |
| THEM4    | 0.50336 | 0.46968 | 0.838 | 0.79 | 1 | HC_vs_MS.NoTrt_F |
| FOS      | 0.50343 | 1.03496 | 0.451 | 0.5  | 1 | HC_vs_MS.NoTrt_F |
| TERF2    | 0.50372 | 0.28312 | 0.91  | 0.87 | 1 | HC_vs_MS.NoTrt_F |
| EYS      | 0.50388 | 0.34538 | 0.801 | 0.83 | 1 | HC_vs_MS.NoTrt_F |
| B4GALT1  | 0.50391 | 0.54103 | 0.702 | 0.74 | 1 | HC_vs_MS.NoTrt_F |
| ZSCAN21  | 0.50406 | -0.7195 | 0.28  | 0.31 | 1 | HC_vs_MS.NoTrt_F |
| PHACTR3  | 0.50432 | 0.46741 | 0.176 | 0.16 | 1 | HC_vs_MS.NoTrt_F |
| ASAP1    | 0.50435 | 1.2913  | 0.257 | 0.24 | 1 | HC_vs_MS.NoTrt_F |
| ZNF639   | 0.50454 | -0.4117 | 0.942 | 0.93 | 1 | HC_vs_MS.NoTrt_F |
| MRPS6    | 0.50564 | 0.25915 | 0.283 | 0.32 | 1 | HC_vs_MS.NoTrt_F |
| DCTN6    | 0.50623 | -0.2693 | 0.613 | 0.62 | 1 | HC_vs_MS.NoTrt_F |
| MED24    | 0.50646 | -0.4096 | 0.636 | 0.64 | 1 | HC_vs_MS.NoTrt_F |
| DBF4     | 0.50658 | 0.53764 | 0.488 | 0.45 | 1 | HC_vs_MS.NoTrt_F |
| CCDC152  | 0.50713 | -1.1744 | 0.251 | 0.27 | 1 | HC_vs_MS.NoTrt_F |
| ZNF131   | 0.50762 | 0.31453 | 0.861 | 0.87 | 1 | HC_vs_MS.NoTrt_F |
| RNF215   | 0.50793 | -0.3855 | 0.523 | 0.54 | 1 | HC_vs_MS.NoTrt_F |
| ERVW-1   | 0.50808 | 0.29284 | 0.445 | 0.41 | 1 | HC_vs_MS.NoTrt_F |
| FRRS1    | 0.50823 | 0.31587 | 0.552 | 0.55 | 1 | HC_vs_MS.NoTrt_F |
| USF3     | 0.50857 | 0.85432 | 0.737 | 0.77 | 1 | HC_vs_MS.NoTrt_F |
| ZC3H12B  | 0.50897 | -0.4226 | 0.63  | 0.62 | 1 | HC_vs_MS.NoTrt_F |
| KCNB1    | 0.50908 | 0.40059 | 0.925 | 0.91 | 1 | HC_vs_MS.NoTrt_F |
| NISCH    | 0.50965 | 0.77154 | 0.454 | 0.49 | 1 | HC_vs_MS.NoTrt_F |
| PUS7     | 0.51    | -0.7111 | 0.373 | 0.4  | 1 | HC_vs_MS.NoTrt_F |
| PADI2    | 0.51039 | 0.49626 | 0.315 | 0.29 | 1 | HC_vs_MS.NoTrt_F |
| NCAPH2   | 0.51065 | 0.76538 | 0.757 | 0.81 | 1 | HC_vs_MS.NoTrt_F |
| APELA    | 0.51079 | 0.27257 | 0.431 | 0.45 | 1 | HC_vs_MS.NoTrt_F |
| ITPR3    | 0.51081 | 0.75933 | 0.205 | 0.24 | 1 | HC_vs_MS.NoTrt_F |
| EVA1C    | 0.51098 | -0.335  | 0.202 | 0.23 | 1 | HC_vs_MS.NoTrt_F |
| CHTF8    | 0.51104 | 0.44933 | 0.301 | 0.33 | 1 | HC_vs_MS.NoTrt_F |
| SMG9     | 0.51117 | 0.41634 | 0.688 | 0.66 | 1 | HC_vs_MS.NoTrt_F |
| HDAC9    | 0.51163 | 0.35958 | 0.465 | 0.49 | 1 | HC_vs_MS.NoTrt_F |
| ZNF397   | 0.51195 | -0.265  | 0.962 | 0.96 | 1 | HC_vs_MS.NoTrt_F |
| RNASE4   | 0.51215 | 0.32596 | 0.084 | 0.11 | 1 | HC_vs_MS.NoTrt_F |
| CATIP    | 0.51264 | 0.27124 | 0.882 | 0.91 | 1 | HC_vs_MS.NoTrt_F |
| CLASP2   | 0.51281 | 0.6492  | 0.751 | 0.82 | 1 | HC_vs_MS.NoTrt_F |
| PLEKHA1  | 0.51291 | -0.2689 | 0.96  | 0.95 | 1 | HC_vs_MS.NoTrt_F |
| MBTD1    | 0.51296 | 0.60971 | 0.509 | 0.53 | 1 | HC_vs_MS.NoTrt_F |
| ZBTB8OS  | 0.51303 | 0.34671 | 0.948 | 0.98 | 1 | HC_vs_MS.NoTrt_F |
| ANKRD36B | 0.51343 | 0.29663 | 0.743 | 0.77 | 1 | HC_vs_MS.NoTrt_F |

|           |         |         |       |      |   |                  |
|-----------|---------|---------|-------|------|---|------------------|
| KIAA1324L | 0.5135  | 1.17697 | 0.104 | 0.13 | 1 | HC_vs_MS.NoTrt_F |
| PACRGL    | 0.51369 | 0.71574 | 0.312 | 0.29 | 1 | HC_vs_MS.NoTrt_F |
| SRPK3     | 0.51421 | -0.2871 | 0.315 | 0.34 | 1 | HC_vs_MS.NoTrt_F |
| PBX1      | 0.51427 | 0.27593 | 0.934 | 0.95 | 1 | HC_vs_MS.NoTrt_F |
| ANKRD16   | 0.51467 | 0.39211 | 0.471 | 0.49 | 1 | HC_vs_MS.NoTrt_F |
| HIVEP2    | 0.51495 | 0.38463 | 0.382 | 0.4  | 1 | HC_vs_MS.NoTrt_F |
| PSMF1     | 0.51513 | 0.31813 | 0.315 | 0.36 | 1 | HC_vs_MS.NoTrt_F |
| EPN2      | 0.51565 | 0.45145 | 0.858 | 0.9  | 1 | HC_vs_MS.NoTrt_F |
| STARD8    | 0.51572 | 0.37966 | 0.76  | 0.76 | 1 | HC_vs_MS.NoTrt_F |
| F5        | 0.51635 | 0.59383 | 0.257 | 0.3  | 1 | HC_vs_MS.NoTrt_F |
| HEATR4    | 0.51646 | 0.4911  | 0.413 | 0.44 | 1 | HC_vs_MS.NoTrt_F |
| MYO1C     | 0.51663 | 0.92731 | 0.269 | 0.25 | 1 | HC_vs_MS.NoTrt_F |
| DCP1A     | 0.51708 | 0.43393 | 0.451 | 0.4  | 1 | HC_vs_MS.NoTrt_F |
| CD40      | 0.51726 | -0.3196 | 0.185 | 0.21 | 1 | HC_vs_MS.NoTrt_F |
| GATM      | 0.51755 | 0.31732 | 0.237 | 0.26 | 1 | HC_vs_MS.NoTrt_F |
| MBOAT2    | 0.51812 | 0.564   | 0.379 | 0.33 | 1 | HC_vs_MS.NoTrt_F |
| MAP3K13   | 0.51829 | 0.50697 | 0.85  | 0.83 | 1 | HC_vs_MS.NoTrt_F |
| HFE       | 0.51898 | -0.4065 | 0.665 | 0.67 | 1 | HC_vs_MS.NoTrt_F |
| GAN       | 0.51959 | 0.44503 | 0.876 | 0.85 | 1 | HC_vs_MS.NoTrt_F |
| SPAG7     | 0.51965 | 0.37039 | 0.893 | 0.87 | 1 | HC_vs_MS.NoTrt_F |
| MAPKAPK2  | 0.52019 | 1.13818 | 0.104 | 0.13 | 1 | HC_vs_MS.NoTrt_F |
| CC2D2B    | 0.5202  | 0.40174 | 0.185 | 0.21 | 1 | HC_vs_MS.NoTrt_F |
| BCLAF1    | 0.52069 | 0.40968 | 0.512 | 0.59 | 1 | HC_vs_MS.NoTrt_F |
| MED29     | 0.52071 | 0.25779 | 0.627 | 0.67 | 1 | HC_vs_MS.NoTrt_F |
| MTMR4     | 0.52119 | 0.69965 | 0.298 | 0.33 | 1 | HC_vs_MS.NoTrt_F |
| ZHX1      | 0.52188 | -0.5545 | 0.598 | 0.61 | 1 | HC_vs_MS.NoTrt_F |
| UHRF1BP1  | 0.5219  | 0.41583 | 0.616 | 0.64 | 1 | HC_vs_MS.NoTrt_F |
| F3        | 0.52289 | 0.30945 | 0.535 | 0.5  | 1 | HC_vs_MS.NoTrt_F |
| TNKS      | 0.52294 | 0.75808 | 0.844 | 0.84 | 1 | HC_vs_MS.NoTrt_F |
| ABCD4     | 0.52329 | 0.36103 | 0.855 | 0.83 | 1 | HC_vs_MS.NoTrt_F |
| DHX37     | 0.52406 | 0.40524 | 0.561 | 0.57 | 1 | HC_vs_MS.NoTrt_F |
| TSN       | 0.52434 | -0.6345 | 0.428 | 0.44 | 1 | HC_vs_MS.NoTrt_F |
| AQR       | 0.52521 | -0.363  | 0.671 | 0.67 | 1 | HC_vs_MS.NoTrt_F |
| PIGA      | 0.52538 | -0.5708 | 0.488 | 0.51 | 1 | HC_vs_MS.NoTrt_F |
| 11-Sep    | 0.52539 | 0.72621 | 0.538 | 0.51 | 1 | HC_vs_MS.NoTrt_F |
| PDIA5     | 0.52541 | 0.45356 | 0.434 | 0.46 | 1 | HC_vs_MS.NoTrt_F |
| SEPP1     | 0.52558 | 1.30706 | 0.188 | 0.22 | 1 | HC_vs_MS.NoTrt_F |
| GATB      | 0.52628 | 1.0095  | 0.292 | 0.27 | 1 | HC_vs_MS.NoTrt_F |
| ABCG8     | 0.52643 | 0.69402 | 0.633 | 0.67 | 1 | HC_vs_MS.NoTrt_F |
| SLC41A2   | 0.52676 | 0.28298 | 0.28  | 0.29 | 1 | HC_vs_MS.NoTrt_F |

|           |         |         |       |      |   |                  |
|-----------|---------|---------|-------|------|---|------------------|
| MED28     | 0.52697 | -0.4094 | 0.91  | 0.92 | 1 | HC_vs_MS.NoTrt_F |
| MTRF1L    | 0.52703 | 0.69871 | 0.133 | 0.16 | 1 | HC_vs_MS.NoTrt_F |
| ADAM33    | 0.52705 | 0.56805 | 0.107 | 0.13 | 1 | HC_vs_MS.NoTrt_F |
| ZNF284    | 0.52713 | 0.26021 | 0.613 | 0.61 | 1 | HC_vs_MS.NoTrt_F |
| LPAR4     | 0.5274  | -0.481  | 0.185 | 0.2  | 1 | HC_vs_MS.NoTrt_F |
| TKT       | 0.52744 | 0.41178 | 0.705 | 0.66 | 1 | HC_vs_MS.NoTrt_F |
| SLC36A4   | 0.52768 | -0.405  | 0.104 | 0.13 | 1 | HC_vs_MS.NoTrt_F |
| SLC31A2   | 0.52795 | 0.48508 | 0.13  | 0.16 | 1 | HC_vs_MS.NoTrt_F |
| COX19     | 0.52882 | 0.632   | 0.685 | 0.66 | 1 | HC_vs_MS.NoTrt_F |
| PUS3      | 0.52888 | 1.44949 | 0.358 | 0.39 | 1 | HC_vs_MS.NoTrt_F |
| HHIP      | 0.5292  | 0.43207 | 0.405 | 0.38 | 1 | HC_vs_MS.NoTrt_F |
| PLD6      | 0.52945 | -0.6199 | 0.477 | 0.48 | 1 | HC_vs_MS.NoTrt_F |
| FUT10     | 0.52969 | 0.38474 | 0.428 | 0.44 | 1 | HC_vs_MS.NoTrt_F |
| HSPA2     | 0.53012 | -0.4696 | 0.624 | 0.59 | 1 | HC_vs_MS.NoTrt_F |
| VAPA      | 0.53021 | 0.31312 | 0.789 | 0.77 | 1 | HC_vs_MS.NoTrt_F |
| TLE3      | 0.53074 | 0.7707  | 0.298 | 0.34 | 1 | HC_vs_MS.NoTrt_F |
| SPDYE1    | 0.53081 | 0.6151  | 0.483 | 0.47 | 1 | HC_vs_MS.NoTrt_F |
| TIMP2     | 0.53124 | 1.21164 | 0.202 | 0.23 | 1 | HC_vs_MS.NoTrt_F |
| FUT2      | 0.53184 | 0.3392  | 0.754 | 0.77 | 1 | HC_vs_MS.NoTrt_F |
| C12orf57  | 0.53191 | 0.56107 | 0.451 | 0.41 | 1 | HC_vs_MS.NoTrt_F |
| ATXN1     | 0.53205 | 0.35985 | 0.39  | 0.42 | 1 | HC_vs_MS.NoTrt_F |
| PRAM1     | 0.53271 | 0.34211 | 0.564 | 0.6  | 1 | HC_vs_MS.NoTrt_F |
| LINC00672 | 0.53301 | -0.3904 | 0.572 | 0.59 | 1 | HC_vs_MS.NoTrt_F |
| SFMBT2    | 0.53362 | 2.82159 | 0.379 | 0.38 | 1 | HC_vs_MS.NoTrt_F |
| STK3      | 0.5339  | 0.61489 | 0.786 | 0.82 | 1 | HC_vs_MS.NoTrt_F |
| DYNC1H1   | 0.53408 | 0.53741 | 0.957 | 0.93 | 1 | HC_vs_MS.NoTrt_F |
| ZFPM2     | 0.5342  | 0.36547 | 0.442 | 0.5  | 1 | HC_vs_MS.NoTrt_F |
| PLEKHG6   | 0.53454 | 0.39672 | 0.303 | 0.33 | 1 | HC_vs_MS.NoTrt_F |
| EIF3B     | 0.53462 | 0.56493 | 0.422 | 0.4  | 1 | HC_vs_MS.NoTrt_F |
| ZNF75A    | 0.53483 | -0.5199 | 0.783 | 0.83 | 1 | HC_vs_MS.NoTrt_F |
| CGREF1    | 0.53497 | 0.49131 | 0.101 | 0.12 | 1 | HC_vs_MS.NoTrt_F |
| MGLL      | 0.53499 | 0.34251 | 0.431 | 0.4  | 1 | HC_vs_MS.NoTrt_F |
| PINK1     | 0.53505 | 0.75474 | 0.301 | 0.33 | 1 | HC_vs_MS.NoTrt_F |
| LIMS2     | 0.5355  | 1.2844  | 0.142 | 0.13 | 1 | HC_vs_MS.NoTrt_F |
| MAB21L3   | 0.53557 | 0.30793 | 0.399 | 0.4  | 1 | HC_vs_MS.NoTrt_F |
| MAP3K11   | 0.53558 | 0.3808  | 0.717 | 0.7  | 1 | HC_vs_MS.NoTrt_F |
| MYO1D     | 0.53592 | 1.90377 | 0.202 | 0.23 | 1 | HC_vs_MS.NoTrt_F |
| CX3CL1    | 0.53596 | 0.31547 | 0.604 | 0.59 | 1 | HC_vs_MS.NoTrt_F |
| WARS      | 0.53634 | 0.74629 | 0.315 | 0.34 | 1 | HC_vs_MS.NoTrt_F |
| JAM2      | 0.53646 | 0.32735 | 0.607 | 0.58 | 1 | HC_vs_MS.NoTrt_F |

|          |         |         |       |      |   |                  |
|----------|---------|---------|-------|------|---|------------------|
| OLFML1   | 0.53669 | 0.4118  | 0.263 | 0.28 | 1 | HC_vs_MS.NoTrt_F |
| FBXO45   | 0.537   | 0.71375 | 0.509 | 0.46 | 1 | HC_vs_MS.NoTrt_F |
| INPP5B   | 0.53723 | -0.2538 | 0.96  | 0.95 | 1 | HC_vs_MS.NoTrt_F |
| FBXL12   | 0.53734 | -0.4608 | 0.723 | 0.71 | 1 | HC_vs_MS.NoTrt_F |
| MRM2     | 0.53736 | -0.3956 | 0.393 | 0.39 | 1 | HC_vs_MS.NoTrt_F |
| MAD2L1   | 0.53744 | -0.3648 | 0.477 | 0.49 | 1 | HC_vs_MS.NoTrt_F |
| DTWD1    | 0.53772 | 0.32475 | 0.659 | 0.64 | 1 | HC_vs_MS.NoTrt_F |
| UBN2     | 0.53779 | -0.7725 | 0.708 | 0.64 | 1 | HC_vs_MS.NoTrt_F |
| ZNF177   | 0.5382  | 1.01897 | 0.107 | 0.13 | 1 | HC_vs_MS.NoTrt_F |
| LAPTM4B  | 0.53833 | 0.64982 | 0.225 | 0.24 | 1 | HC_vs_MS.NoTrt_F |
| 8-Mar    | 0.53838 | 1.03484 | 0.413 | 0.46 | 1 | HC_vs_MS.NoTrt_F |
| PROSER3  | 0.53844 | 0.6415  | 0.916 | 0.9  | 1 | HC_vs_MS.NoTrt_F |
| TMED9    | 0.5391  | 0.27575 | 0.431 | 0.47 | 1 | HC_vs_MS.NoTrt_F |
| GMEB1    | 0.53926 | -0.4422 | 0.821 | 0.83 | 1 | HC_vs_MS.NoTrt_F |
| DCTN2    | 0.53931 | -0.2537 | 0.662 | 0.65 | 1 | HC_vs_MS.NoTrt_F |
| DNM3     | 0.53943 | 0.95334 | 0.121 | 0.14 | 1 | HC_vs_MS.NoTrt_F |
| KLHL11   | 0.53951 | 0.60988 | 0.584 | 0.59 | 1 | HC_vs_MS.NoTrt_F |
| DNM1     | 0.53981 | 0.4316  | 0.65  | 0.65 | 1 | HC_vs_MS.NoTrt_F |
| C9orf3   | 0.53987 | 0.86283 | 0.78  | 0.79 | 1 | HC_vs_MS.NoTrt_F |
| AMPD3    | 0.54021 | -0.8584 | 0.436 | 0.47 | 1 | HC_vs_MS.NoTrt_F |
| GRAMD4   | 0.54053 | 1.02795 | 0.104 | 0.13 | 1 | HC_vs_MS.NoTrt_F |
| ZBTB20   | 0.54059 | 0.32019 | 0.801 | 0.8  | 1 | HC_vs_MS.NoTrt_F |
| ASCC1    | 0.54099 | 0.29344 | 0.714 | 0.73 | 1 | HC_vs_MS.NoTrt_F |
| DSCR3    | 0.54125 | 0.27284 | 0.734 | 0.76 | 1 | HC_vs_MS.NoTrt_F |
| KIAA1958 | 0.54159 | -0.317  | 0.728 | 0.75 | 1 | HC_vs_MS.NoTrt_F |
| ZNF764   | 0.54301 | 1.46572 | 0.399 | 0.4  | 1 | HC_vs_MS.NoTrt_F |
| UBE2J2   | 0.54325 | 0.65532 | 0.361 | 0.39 | 1 | HC_vs_MS.NoTrt_F |
| MBD6     | 0.544   | 0.77238 | 0.329 | 0.32 | 1 | HC_vs_MS.NoTrt_F |
| SYVN1    | 0.54416 | 0.30648 | 0.298 | 0.33 | 1 | HC_vs_MS.NoTrt_F |
| CARD19   | 0.54424 | 0.62757 | 0.37  | 0.41 | 1 | HC_vs_MS.NoTrt_F |
| SLC4A8   | 0.5443  | 0.38472 | 0.948 | 0.92 | 1 | HC_vs_MS.NoTrt_F |
| MAP3K2   | 0.54443 | 0.39815 | 0.301 | 0.34 | 1 | HC_vs_MS.NoTrt_F |
| CRIM1    | 0.54469 | 1.06465 | 0.289 | 0.27 | 1 | HC_vs_MS.NoTrt_F |
| SERTAD1  | 0.54493 | 0.36686 | 0.442 | 0.45 | 1 | HC_vs_MS.NoTrt_F |
| C16orf45 | 0.54626 | 0.7138  | 0.22  | 0.25 | 1 | HC_vs_MS.NoTrt_F |
| ECI2     | 0.54675 | 0.38187 | 0.743 | 0.7  | 1 | HC_vs_MS.NoTrt_F |
| CXorf57  | 0.54697 | 0.79527 | 0.179 | 0.16 | 1 | HC_vs_MS.NoTrt_F |
| HIST1H1E | 0.54711 | 1.41641 | 0.136 | 0.16 | 1 | HC_vs_MS.NoTrt_F |
| COX7B    | 0.54721 | 0.27425 | 0.552 | 0.59 | 1 | HC_vs_MS.NoTrt_F |
| NDUFS1   | 0.54752 | -0.6178 | 0.962 | 0.94 | 1 | HC_vs_MS.NoTrt_F |



|          |         |         |       |      |   |                  |
|----------|---------|---------|-------|------|---|------------------|
| PTGER4   | 0.5478  | 0.76039 | 0.277 | 0.32 | 1 | HC_vs_MS.NoTrt_F |
| SYMPK    | 0.54784 | 0.53058 | 0.922 | 0.92 | 1 | HC_vs_MS.NoTrt_F |
| TIMM21   | 0.54791 | -0.3955 | 0.688 | 0.64 | 1 | HC_vs_MS.NoTrt_F |
| AP3M2    | 0.54826 | 0.65243 | 0.208 | 0.24 | 1 | HC_vs_MS.NoTrt_F |
| PAPOLG   | 0.54859 | 0.7023  | 0.827 | 0.8  | 1 | HC_vs_MS.NoTrt_F |
| DLC1     | 0.54888 | 0.47699 | 0.202 | 0.23 | 1 | HC_vs_MS.NoTrt_F |
| PNP      | 0.54896 | 0.80722 | 0.416 | 0.4  | 1 | HC_vs_MS.NoTrt_F |
| BCO2     | 0.549   | 0.29665 | 0.627 | 0.58 | 1 | HC_vs_MS.NoTrt_F |
| PHPT1    | 0.54933 | 0.3948  | 0.228 | 0.25 | 1 | HC_vs_MS.NoTrt_F |
| GAL3ST4  | 0.54956 | -0.3299 | 0.451 | 0.45 | 1 | HC_vs_MS.NoTrt_F |
| CRYGS    | 0.54957 | 1.09897 | 0.286 | 0.32 | 1 | HC_vs_MS.NoTrt_F |
| FBXO16   | 0.54961 | 0.28134 | 0.327 | 0.3  | 1 | HC_vs_MS.NoTrt_F |
| MRI1     | 0.54963 | -0.3247 | 0.749 | 0.77 | 1 | HC_vs_MS.NoTrt_F |
| KIN      | 0.55038 | -0.5741 | 0.772 | 0.82 | 1 | HC_vs_MS.NoTrt_F |
| TCAF2    | 0.55072 | -0.3228 | 0.78  | 0.81 | 1 | HC_vs_MS.NoTrt_F |
| ZNF589   | 0.55142 | 0.35474 | 0.538 | 0.55 | 1 | HC_vs_MS.NoTrt_F |
| PHLDA3   | 0.5517  | 0.76326 | 0.425 | 0.4  | 1 | HC_vs_MS.NoTrt_F |
| ASPH     | 0.55183 | 0.72868 | 0.569 | 0.56 | 1 | HC_vs_MS.NoTrt_F |
| CERKL    | 0.55252 | 0.25912 | 0.451 | 0.45 | 1 | HC_vs_MS.NoTrt_F |
| PAQR8    | 0.55326 | 0.29083 | 0.607 | 0.61 | 1 | HC_vs_MS.NoTrt_F |
| MYDGF    | 0.55358 | 0.5258  | 0.231 | 0.26 | 1 | HC_vs_MS.NoTrt_F |
| PPIL6    | 0.55367 | 0.43922 | 0.54  | 0.54 | 1 | HC_vs_MS.NoTrt_F |
| FOCAD    | 0.55453 | 0.35812 | 0.561 | 0.52 | 1 | HC_vs_MS.NoTrt_F |
| SVEP1    | 0.55486 | 2.16173 | 0.243 | 0.22 | 1 | HC_vs_MS.NoTrt_F |
| MS4A6A   | 0.55508 | 1.55636 | 0.202 | 0.23 | 1 | HC_vs_MS.NoTrt_F |
| IL15     | 0.55564 | -0.8237 | 0.387 | 0.41 | 1 | HC_vs_MS.NoTrt_F |
| CAPN10   | 0.55587 | 0.57547 | 0.566 | 0.58 | 1 | HC_vs_MS.NoTrt_F |
| PLEKHG4B | 0.55589 | 0.51204 | 0.509 | 0.53 | 1 | HC_vs_MS.NoTrt_F |
| CARMIL1  | 0.55606 | 1.24672 | 0.361 | 0.32 | 1 | HC_vs_MS.NoTrt_F |
| KLRG1    | 0.55606 | 1.3109  | 0.465 | 0.48 | 1 | HC_vs_MS.NoTrt_F |
| ZNF615   | 0.5563  | 0.30203 | 0.549 | 0.62 | 1 | HC_vs_MS.NoTrt_F |
| HDAC4    | 0.55636 | 0.46581 | 0.601 | 0.65 | 1 | HC_vs_MS.NoTrt_F |
| METTL25  | 0.55642 | 1.25334 | 0.257 | 0.24 | 1 | HC_vs_MS.NoTrt_F |
| ATXN10   | 0.55738 | 0.48977 | 0.587 | 0.62 | 1 | HC_vs_MS.NoTrt_F |
| POMT1    | 0.5575  | 0.32155 | 0.584 | 0.58 | 1 | HC_vs_MS.NoTrt_F |
| PARP12   | 0.55775 | 1.2341  | 0.269 | 0.29 | 1 | HC_vs_MS.NoTrt_F |
| ZNF746   | 0.55825 | 0.47169 | 0.324 | 0.35 | 1 | HC_vs_MS.NoTrt_F |
| CNPY4    | 0.55836 | -0.288  | 0.725 | 0.72 | 1 | HC_vs_MS.NoTrt_F |
| PPARGC1B | 0.5585  | 0.47466 | 0.763 | 0.76 | 1 | HC_vs_MS.NoTrt_F |
| TAF1     | 0.55883 | -0.6712 | 0.815 | 0.85 | 1 | HC_vs_MS.NoTrt_F |

|           |         |         |       |      |   |                  |
|-----------|---------|---------|-------|------|---|------------------|
| ZFYVE27   | 0.55915 | 0.92868 | 0.225 | 0.26 | 1 | HC_vs_MS.NoTrt_F |
| SLC5A12   | 0.56012 | 0.4281  | 0.124 | 0.15 | 1 | HC_vs_MS.NoTrt_F |
| FAM168A   | 0.56013 | 0.44296 | 0.185 | 0.17 | 1 | HC_vs_MS.NoTrt_F |
| KLK2      | 0.5604  | 0.28453 | 0.379 | 0.41 | 1 | HC_vs_MS.NoTrt_F |
| MMP11     | 0.56106 | 0.48603 | 0.431 | 0.39 | 1 | HC_vs_MS.NoTrt_F |
| PCBP2     | 0.56112 | 0.27605 | 0.653 | 0.68 | 1 | HC_vs_MS.NoTrt_F |
| TTC34     | 0.56134 | 0.35445 | 0.217 | 0.24 | 1 | HC_vs_MS.NoTrt_F |
| BCL7B     | 0.56134 | 1.24803 | 0.52  | 0.48 | 1 | HC_vs_MS.NoTrt_F |
| TUBB3     | 0.56146 | 0.53237 | 0.292 | 0.32 | 1 | HC_vs_MS.NoTrt_F |
| GSK3A     | 0.56148 | -0.6261 | 0.353 | 0.37 | 1 | HC_vs_MS.NoTrt_F |
| SELK      | 0.562   | 0.33205 | 0.54  | 0.52 | 1 | HC_vs_MS.NoTrt_F |
| RREB1     | 0.56213 | 0.50627 | 0.812 | 0.8  | 1 | HC_vs_MS.NoTrt_F |
| FBXO46    | 0.56236 | 0.38884 | 0.315 | 0.34 | 1 | HC_vs_MS.NoTrt_F |
| NFATC2IP  | 0.56254 | 0.46938 | 0.749 | 0.73 | 1 | HC_vs_MS.NoTrt_F |
| POMZP3    | 0.56274 | 0.50604 | 0.538 | 0.54 | 1 | HC_vs_MS.NoTrt_F |
| NAA30     | 0.56278 | -0.7133 | 0.54  | 0.54 | 1 | HC_vs_MS.NoTrt_F |
| COL1A1    | 0.56286 | 0.92228 | 0.558 | 0.55 | 1 | HC_vs_MS.NoTrt_F |
| SCML4     | 0.56289 | 0.7982  | 0.662 | 0.75 | 1 | HC_vs_MS.NoTrt_F |
| SNRNP200  | 0.56333 | 0.35017 | 0.815 | 0.83 | 1 | HC_vs_MS.NoTrt_F |
| TPSB2     | 0.56354 | 3.56604 | 0.286 | 0.27 | 1 | HC_vs_MS.NoTrt_F |
| NUDCD1    | 0.56441 | 1.79166 | 0.162 | 0.14 | 1 | HC_vs_MS.NoTrt_F |
| IL4R      | 0.56521 | 0.36855 | 0.506 | 0.49 | 1 | HC_vs_MS.NoTrt_F |
| ALDH1L2   | 0.56636 | 0.8532  | 0.335 | 0.31 | 1 | HC_vs_MS.NoTrt_F |
| CEP57L1   | 0.56688 | -0.4122 | 0.601 | 0.61 | 1 | HC_vs_MS.NoTrt_F |
| ZNF573    | 0.56735 | -0.2707 | 0.413 | 0.43 | 1 | HC_vs_MS.NoTrt_F |
| GPR174    | 0.56736 | 1.02708 | 0.263 | 0.26 | 1 | HC_vs_MS.NoTrt_F |
| RGS11     | 0.56744 | 0.89106 | 0.217 | 0.2  | 1 | HC_vs_MS.NoTrt_F |
| ZFYVE21   | 0.56758 | -0.29   | 0.737 | 0.73 | 1 | HC_vs_MS.NoTrt_F |
| ALS2      | 0.5678  | -0.9981 | 0.497 | 0.52 | 1 | HC_vs_MS.NoTrt_F |
| MAPK1IP1L | 0.56785 | 0.33688 | 0.896 | 0.9  | 1 | HC_vs_MS.NoTrt_F |
| NLE1      | 0.56915 | 0.33293 | 0.321 | 0.35 | 1 | HC_vs_MS.NoTrt_F |
| STX7      | 0.56944 | 0.87951 | 0.795 | 0.76 | 1 | HC_vs_MS.NoTrt_F |
| NSUN6     | 0.56972 | -0.2697 | 0.728 | 0.76 | 1 | HC_vs_MS.NoTrt_F |
| PKN2      | 0.57012 | 1.60886 | 0.379 | 0.43 | 1 | HC_vs_MS.NoTrt_F |
| SRD5A1    | 0.57024 | -0.5118 | 0.749 | 0.75 | 1 | HC_vs_MS.NoTrt_F |
| RNGTT     | 0.57048 | 0.79512 | 0.439 | 0.46 | 1 | HC_vs_MS.NoTrt_F |
| GJB4      | 0.57055 | 0.32094 | 0.74  | 0.73 | 1 | HC_vs_MS.NoTrt_F |
| DDX27     | 0.57102 | 0.54887 | 0.737 | 0.72 | 1 | HC_vs_MS.NoTrt_F |
| DENR      | 0.57103 | 0.26951 | 0.751 | 0.77 | 1 | HC_vs_MS.NoTrt_F |
| VHL       | 0.57105 | -0.2897 | 0.815 | 0.82 | 1 | HC_vs_MS.NoTrt_F |

|            |         |         |       |      |   |                  |
|------------|---------|---------|-------|------|---|------------------|
| TTC22      | 0.57136 | -0.3479 | 0.494 | 0.52 | 1 | HC_vs_MS.NoTrt_F |
| GET4       | 0.57213 | 0.40219 | 0.535 | 0.56 | 1 | HC_vs_MS.NoTrt_F |
| ID2        | 0.57217 | 0.63986 | 0.118 | 0.14 | 1 | HC_vs_MS.NoTrt_F |
| CTPS2      | 0.57232 | 0.60942 | 0.142 | 0.17 | 1 | HC_vs_MS.NoTrt_F |
| MYO9B      | 0.57238 | 0.80465 | 0.275 | 0.32 | 1 | HC_vs_MS.NoTrt_F |
| MRS2       | 0.57246 | 0.27826 | 0.812 | 0.82 | 1 | HC_vs_MS.NoTrt_F |
| FAM124B    | 0.57296 | -0.9682 | 0.118 | 0.14 | 1 | HC_vs_MS.NoTrt_F |
| ZNF813     | 0.57304 | 0.66061 | 0.763 | 0.77 | 1 | HC_vs_MS.NoTrt_F |
| TMEM107    | 0.57318 | 1.0017  | 0.581 | 0.58 | 1 | HC_vs_MS.NoTrt_F |
| GNAQ       | 0.57346 | 0.59689 | 0.257 | 0.29 | 1 | HC_vs_MS.NoTrt_F |
| RNPC3      | 0.57386 | 0.98265 | 0.405 | 0.4  | 1 | HC_vs_MS.NoTrt_F |
| PDE12      | 0.57389 | -0.3324 | 0.919 | 0.91 | 1 | HC_vs_MS.NoTrt_F |
| HIF1AN     | 0.57398 | 0.49672 | 0.89  | 0.87 | 1 | HC_vs_MS.NoTrt_F |
| IQCF3      | 0.57489 | 0.27712 | 0.327 | 0.37 | 1 | HC_vs_MS.NoTrt_F |
| RP11-552F3 | 0.57572 | -0.4257 | 0.22  | 0.24 | 1 | HC_vs_MS.NoTrt_F |
| TMPRSS3    | 0.57634 | -0.7085 | 0.379 | 0.38 | 1 | HC_vs_MS.NoTrt_F |
| BCCIP      | 0.57638 | 0.56748 | 0.228 | 0.25 | 1 | HC_vs_MS.NoTrt_F |
| ZMAT1      | 0.57643 | 0.28452 | 0.39  | 0.42 | 1 | HC_vs_MS.NoTrt_F |
| SPHK2      | 0.57662 | 0.88765 | 0.393 | 0.37 | 1 | HC_vs_MS.NoTrt_F |
| TBP        | 0.57667 | 0.70849 | 0.431 | 0.48 | 1 | HC_vs_MS.NoTrt_F |
| ELOF1      | 0.57699 | 0.3504  | 0.61  | 0.64 | 1 | HC_vs_MS.NoTrt_F |
| FAM219B    | 0.57757 | 0.90905 | 0.566 | 0.53 | 1 | HC_vs_MS.NoTrt_F |
| IRS1       | 0.5776  | 0.46606 | 0.107 | 0.13 | 1 | HC_vs_MS.NoTrt_F |
| PSMB6      | 0.57775 | 0.51581 | 0.645 | 0.62 | 1 | HC_vs_MS.NoTrt_F |
| PSTPIP1    | 0.57778 | 0.47771 | 0.535 | 0.51 | 1 | HC_vs_MS.NoTrt_F |
| FAM19A2    | 0.57809 | 1.17738 | 0.289 | 0.32 | 1 | HC_vs_MS.NoTrt_F |
| RGS17      | 0.57832 | 0.43471 | 0.488 | 0.51 | 1 | HC_vs_MS.NoTrt_F |
| MAK        | 0.57833 | 0.65159 | 0.249 | 0.23 | 1 | HC_vs_MS.NoTrt_F |
| AEBP2      | 0.57947 | 0.36932 | 0.754 | 0.77 | 1 | HC_vs_MS.NoTrt_F |
| CCDC69     | 0.57964 | -0.5592 | 0.902 | 0.88 | 1 | HC_vs_MS.NoTrt_F |
| BOP1       | 0.58001 | 0.69978 | 0.249 | 0.26 | 1 | HC_vs_MS.NoTrt_F |
| KIAA1324   | 0.58027 | -0.5967 | 0.798 | 0.81 | 1 | HC_vs_MS.NoTrt_F |
| PDE8A      | 0.58044 | 0.40089 | 0.526 | 0.48 | 1 | HC_vs_MS.NoTrt_F |
| SYBU       | 0.5807  | 1.12276 | 0.113 | 0.1  | 1 | HC_vs_MS.NoTrt_F |
| FYTTD1     | 0.58079 | -0.3629 | 0.838 | 0.86 | 1 | HC_vs_MS.NoTrt_F |
| GIT2       | 0.58116 | 0.33927 | 0.751 | 0.76 | 1 | HC_vs_MS.NoTrt_F |
| UIMC1      | 0.5817  | -0.4577 | 0.879 | 0.86 | 1 | HC_vs_MS.NoTrt_F |
| SHFM1      | 0.58266 | 0.343   | 0.922 | 0.92 | 1 | HC_vs_MS.NoTrt_F |
| WIPI2      | 0.58276 | 0.34361 | 0.549 | 0.55 | 1 | HC_vs_MS.NoTrt_F |
| AREL1      | 0.58319 | 0.46849 | 0.52  | 0.54 | 1 | HC_vs_MS.NoTrt_F |

|          |         |         |       |      |   |                  |
|----------|---------|---------|-------|------|---|------------------|
| CABIN1   | 0.58366 | 0.50342 | 0.37  | 0.41 | 1 | HC_vs_MS.NoTrt_F |
| MRPL48   | 0.58366 | 0.27429 | 0.942 | 0.95 | 1 | HC_vs_MS.NoTrt_F |
| PDE4D    | 0.58398 | 0.90765 | 0.405 | 0.4  | 1 | HC_vs_MS.NoTrt_F |
| ACTL6A   | 0.58465 | 0.27199 | 0.327 | 0.34 | 1 | HC_vs_MS.NoTrt_F |
| RAB13    | 0.58489 | 0.2531  | 0.572 | 0.51 | 1 | HC_vs_MS.NoTrt_F |
| MXD1     | 0.58514 | 0.9312  | 0.171 | 0.19 | 1 | HC_vs_MS.NoTrt_F |
| LFNG     | 0.58546 | 0.53451 | 0.344 | 0.32 | 1 | HC_vs_MS.NoTrt_F |
| SLTM     | 0.58549 | 0.52431 | 0.471 | 0.5  | 1 | HC_vs_MS.NoTrt_F |
| MIEF2    | 0.58558 | 0.39552 | 0.54  | 0.56 | 1 | HC_vs_MS.NoTrt_F |
| SERPINB6 | 0.58575 | 0.75413 | 0.535 | 0.56 | 1 | HC_vs_MS.NoTrt_F |
| KLHL23   | 0.58578 | 0.40051 | 0.223 | 0.24 | 1 | HC_vs_MS.NoTrt_F |
| EP400NL  | 0.58603 | -0.323  | 0.801 | 0.79 | 1 | HC_vs_MS.NoTrt_F |
| PAM      | 0.5866  | 0.45101 | 0.445 | 0.45 | 1 | HC_vs_MS.NoTrt_F |
| CARNS1   | 0.58699 | 0.72441 | 0.243 | 0.26 | 1 | HC_vs_MS.NoTrt_F |
| ZNF585B  | 0.58728 | 0.38495 | 0.772 | 0.75 | 1 | HC_vs_MS.NoTrt_F |
| COL16A1  | 0.5873  | 1.20293 | 0.092 | 0.11 | 1 | HC_vs_MS.NoTrt_F |
| SPTY2D1  | 0.58733 | 0.42503 | 0.422 | 0.44 | 1 | HC_vs_MS.NoTrt_F |
| FBXO25   | 0.58777 | 1.66756 | 0.454 | 0.41 | 1 | HC_vs_MS.NoTrt_F |
| LRP2     | 0.58788 | 0.43939 | 0.098 | 0.12 | 1 | HC_vs_MS.NoTrt_F |
| SETD6    | 0.58794 | 0.47951 | 0.462 | 0.49 | 1 | HC_vs_MS.NoTrt_F |
| RNF7     | 0.58828 | 0.31461 | 0.682 | 0.68 | 1 | HC_vs_MS.NoTrt_F |
| SH3BP5   | 0.58834 | -0.2849 | 0.841 | 0.83 | 1 | HC_vs_MS.NoTrt_F |
| MSRB3    | 0.58851 | 0.27615 | 0.523 | 0.52 | 1 | HC_vs_MS.NoTrt_F |
| SGK1     | 0.58887 | 1.53417 | 0.416 | 0.43 | 1 | HC_vs_MS.NoTrt_F |
| POLI     | 0.58952 | -0.8614 | 0.41  | 0.41 | 1 | HC_vs_MS.NoTrt_F |
| CLEC17A  | 0.58952 | 0.73588 | 0.312 | 0.3  | 1 | HC_vs_MS.NoTrt_F |
| FYN      | 0.58953 | 0.27669 | 0.543 | 0.61 | 1 | HC_vs_MS.NoTrt_F |
| PPIE     | 0.58979 | 0.329   | 0.789 | 0.82 | 1 | HC_vs_MS.NoTrt_F |
| RABL6    | 0.59097 | 0.34976 | 0.578 | 0.6  | 1 | HC_vs_MS.NoTrt_F |
| MEGF6    | 0.591   | 1.05626 | 0.162 | 0.18 | 1 | HC_vs_MS.NoTrt_F |
| NBPF26   | 0.59197 | 0.94714 | 0.35  | 0.37 | 1 | HC_vs_MS.NoTrt_F |
| HENMT1   | 0.59231 | -0.9526 | 0.327 | 0.35 | 1 | HC_vs_MS.NoTrt_F |
| UBE2D4   | 0.59264 | 0.56788 | 0.699 | 0.64 | 1 | HC_vs_MS.NoTrt_F |
| TMEM150C | 0.59278 | 0.58113 | 0.569 | 0.56 | 1 | HC_vs_MS.NoTrt_F |
| ARHGAP27 | 0.59326 | 0.44147 | 0.645 | 0.61 | 1 | HC_vs_MS.NoTrt_F |
| KIAA0232 | 0.59328 | 1.49015 | 0.156 | 0.18 | 1 | HC_vs_MS.NoTrt_F |
| PLCB2    | 0.59351 | 0.90225 | 0.327 | 0.34 | 1 | HC_vs_MS.NoTrt_F |
| FBLN7    | 0.59473 | 0.77655 | 0.439 | 0.43 | 1 | HC_vs_MS.NoTrt_F |
| ATRNL    | 0.59532 | 1.15489 | 0.165 | 0.19 | 1 | HC_vs_MS.NoTrt_F |
| SETD1B   | 0.59547 | 0.65925 | 0.249 | 0.28 | 1 | HC_vs_MS.NoTrt_F |

|            |         |         |       |      |   |                  |
|------------|---------|---------|-------|------|---|------------------|
| DCAF17     | 0.59556 | -0.2522 | 0.483 | 0.45 | 1 | HC_vs_MS.NoTrt_F |
| RP11-235E1 | 0.59569 | 0.8588  | 0.28  | 0.27 | 1 | HC_vs_MS.NoTrt_F |
| C8orf37    | 0.59571 | 0.61575 | 0.552 | 0.56 | 1 | HC_vs_MS.NoTrt_F |
| MICAL3     | 0.59572 | 0.45894 | 0.855 | 0.83 | 1 | HC_vs_MS.NoTrt_F |
| ASPA       | 0.59592 | 0.28655 | 0.801 | 0.81 | 1 | HC_vs_MS.NoTrt_F |
| IRAK3      | 0.59603 | -0.4385 | 0.474 | 0.48 | 1 | HC_vs_MS.NoTrt_F |
| CDC5L      | 0.59604 | -0.3343 | 0.697 | 0.74 | 1 | HC_vs_MS.NoTrt_F |
| EXD2       | 0.59611 | -1.51   | 0.275 | 0.25 | 1 | HC_vs_MS.NoTrt_F |
| ZNF346     | 0.59689 | -0.3618 | 0.809 | 0.8  | 1 | HC_vs_MS.NoTrt_F |
| C11orf1    | 0.5973  | 0.31021 | 0.835 | 0.82 | 1 | HC_vs_MS.NoTrt_F |
| STX17      | 0.59743 | 0.45922 | 0.558 | 0.55 | 1 | HC_vs_MS.NoTrt_F |
| CXorf36    | 0.59756 | 0.5468  | 0.474 | 0.46 | 1 | HC_vs_MS.NoTrt_F |
| NHSL2      | 0.59765 | 0.42839 | 0.749 | 0.74 | 1 | HC_vs_MS.NoTrt_F |
| ITGA2B     | 0.59857 | 0.33192 | 0.471 | 0.48 | 1 | HC_vs_MS.NoTrt_F |
| TDRD3      | 0.59874 | 0.93244 | 0.535 | 0.55 | 1 | HC_vs_MS.NoTrt_F |
| FAH        | 0.59897 | 1.69521 | 0.205 | 0.19 | 1 | HC_vs_MS.NoTrt_F |
| AIFM1      | 0.59958 | -0.5426 | 0.636 | 0.63 | 1 | HC_vs_MS.NoTrt_F |
| RNF207     | 0.6004  | 0.33299 | 0.725 | 0.7  | 1 | HC_vs_MS.NoTrt_F |
| ZC3H12C    | 0.60075 | -0.5181 | 0.133 | 0.15 | 1 | HC_vs_MS.NoTrt_F |
| PRSS53     | 0.60101 | 1.24872 | 0.257 | 0.27 | 1 | HC_vs_MS.NoTrt_F |
| ZNF678     | 0.60104 | 1.63828 | 0.228 | 0.25 | 1 | HC_vs_MS.NoTrt_F |
| NUDT14     | 0.60168 | 0.61679 | 0.509 | 0.54 | 1 | HC_vs_MS.NoTrt_F |
| PODN       | 0.60224 | 1.54156 | 0.436 | 0.46 | 1 | HC_vs_MS.NoTrt_F |
| RAD9A      | 0.60249 | 0.40863 | 0.529 | 0.54 | 1 | HC_vs_MS.NoTrt_F |
| AIFM2      | 0.60274 | 0.63329 | 0.514 | 0.49 | 1 | HC_vs_MS.NoTrt_F |
| CD177      | 0.60281 | 1.70046 | 0.095 | 0.12 | 1 | HC_vs_MS.NoTrt_F |
| AP5B1      | 0.60301 | -0.4141 | 0.335 | 0.37 | 1 | HC_vs_MS.NoTrt_F |
| TRAP1      | 0.6031  | 0.33358 | 0.766 | 0.83 | 1 | HC_vs_MS.NoTrt_F |
| KLHL2      | 0.60349 | 0.57656 | 0.367 | 0.39 | 1 | HC_vs_MS.NoTrt_F |
| UBE2R2     | 0.60357 | 0.90962 | 0.156 | 0.14 | 1 | HC_vs_MS.NoTrt_F |
| LDHC       | 0.60363 | -0.48   | 0.225 | 0.24 | 1 | HC_vs_MS.NoTrt_F |
| CD79B      | 0.60424 | 1.03464 | 0.173 | 0.2  | 1 | HC_vs_MS.NoTrt_F |
| TCTN2      | 0.60435 | 0.3328  | 0.795 | 0.78 | 1 | HC_vs_MS.NoTrt_F |
| EIF5A      | 0.60481 | 0.77614 | 0.575 | 0.65 | 1 | HC_vs_MS.NoTrt_F |
| CD68       | 0.60529 | 0.43676 | 0.604 | 0.62 | 1 | HC_vs_MS.NoTrt_F |
| RP11-1070B | 0.60613 | 0.92709 | 0.243 | 0.23 | 1 | HC_vs_MS.NoTrt_F |
| RHBDD3     | 0.60632 | -0.6673 | 0.613 | 0.58 | 1 | HC_vs_MS.NoTrt_F |
| NPIP9      | 0.60665 | 0.39068 | 0.205 | 0.23 | 1 | HC_vs_MS.NoTrt_F |
| NF1        | 0.60703 | 0.29554 | 0.76  | 0.75 | 1 | HC_vs_MS.NoTrt_F |
| BRD1       | 0.60864 | 1.68649 | 0.199 | 0.19 | 1 | HC_vs_MS.NoTrt_F |

|          |         |         |       |      |   |                  |
|----------|---------|---------|-------|------|---|------------------|
| SLC28A2  | 0.6087  | -0.3279 | 0.809 | 0.8  | 1 | HC_vs_MS.NoTrt_F |
| FOXM1    | 0.60872 | 0.49285 | 0.809 | 0.8  | 1 | HC_vs_MS.NoTrt_F |
| B3GNT7   | 0.60926 | 0.70698 | 0.231 | 0.21 | 1 | HC_vs_MS.NoTrt_F |
| TANC1    | 0.61004 | 0.59539 | 0.376 | 0.39 | 1 | HC_vs_MS.NoTrt_F |
| MAP3K3   | 0.61029 | 0.35806 | 0.179 | 0.2  | 1 | HC_vs_MS.NoTrt_F |
| RBM18    | 0.61029 | -0.5695 | 0.393 | 0.4  | 1 | HC_vs_MS.NoTrt_F |
| CREM     | 0.61072 | 0.75951 | 0.445 | 0.45 | 1 | HC_vs_MS.NoTrt_F |
| MFSD4A   | 0.61078 | -0.3238 | 0.535 | 0.5  | 1 | HC_vs_MS.NoTrt_F |
| SF3B3    | 0.61099 | 0.30374 | 0.971 | 0.97 | 1 | HC_vs_MS.NoTrt_F |
| MTHFD1L  | 0.61111 | 0.8892  | 0.139 | 0.16 | 1 | HC_vs_MS.NoTrt_F |
| PKNOX1   | 0.61155 | -0.4313 | 0.824 | 0.8  | 1 | HC_vs_MS.NoTrt_F |
| FAM92A1  | 0.61167 | -0.357  | 0.358 | 0.39 | 1 | HC_vs_MS.NoTrt_F |
| TAZ      | 0.61197 | 0.28743 | 0.59  | 0.62 | 1 | HC_vs_MS.NoTrt_F |
| VNN2     | 0.61213 | 0.95698 | 0.188 | 0.2  | 1 | HC_vs_MS.NoTrt_F |
| PMPCB    | 0.61252 | 0.6897  | 0.676 | 0.65 | 1 | HC_vs_MS.NoTrt_F |
| USP10    | 0.61313 | 0.39728 | 0.321 | 0.35 | 1 | HC_vs_MS.NoTrt_F |
| GLB1L3   | 0.61366 | 0.29974 | 0.763 | 0.75 | 1 | HC_vs_MS.NoTrt_F |
| NBPF3    | 0.61373 | 1.30898 | 0.488 | 0.54 | 1 | HC_vs_MS.NoTrt_F |
| THUMPD3  | 0.61374 | 0.38022 | 0.434 | 0.45 | 1 | HC_vs_MS.NoTrt_F |
| PTPRJ    | 0.61378 | 0.66526 | 0.41  | 0.45 | 1 | HC_vs_MS.NoTrt_F |
| ZNF74    | 0.61422 | 0.59454 | 0.494 | 0.51 | 1 | HC_vs_MS.NoTrt_F |
| NLRP12   | 0.61526 | 0.35181 | 0.775 | 0.76 | 1 | HC_vs_MS.NoTrt_F |
| GLUL     | 0.61552 | 0.77849 | 0.263 | 0.24 | 1 | HC_vs_MS.NoTrt_F |
| CENPV    | 0.61568 | 0.39941 | 0.801 | 0.77 | 1 | HC_vs_MS.NoTrt_F |
| HELZ2    | 0.61573 | -0.2579 | 0.699 | 0.71 | 1 | HC_vs_MS.NoTrt_F |
| LRCH4    | 0.61588 | 0.75272 | 0.575 | 0.61 | 1 | HC_vs_MS.NoTrt_F |
| C16orf74 | 0.61621 | -0.4325 | 0.277 | 0.29 | 1 | HC_vs_MS.NoTrt_F |
| MRPL44   | 0.61625 | -0.2695 | 0.627 | 0.64 | 1 | HC_vs_MS.NoTrt_F |
| SLC15A4  | 0.61665 | 0.26361 | 0.775 | 0.8  | 1 | HC_vs_MS.NoTrt_F |
| ABCG1    | 0.61674 | -0.2985 | 0.523 | 0.5  | 1 | HC_vs_MS.NoTrt_F |
| SFT2D3   | 0.61699 | 0.26047 | 0.535 | 0.53 | 1 | HC_vs_MS.NoTrt_F |
| NHLRC2   | 0.61724 | 0.26953 | 0.798 | 0.79 | 1 | HC_vs_MS.NoTrt_F |
| FASLG    | 0.61754 | 1.49597 | 0.124 | 0.14 | 1 | HC_vs_MS.NoTrt_F |
| NEXN     | 0.61778 | 0.37832 | 0.535 | 0.51 | 1 | HC_vs_MS.NoTrt_F |
| MFN1     | 0.61779 | -0.3988 | 0.506 | 0.5  | 1 | HC_vs_MS.NoTrt_F |
| PNPLA8   | 0.61797 | 0.56856 | 0.468 | 0.45 | 1 | HC_vs_MS.NoTrt_F |
| PSG2     | 0.61828 | 0.33587 | 0.124 | 0.11 | 1 | HC_vs_MS.NoTrt_F |
| ZNF527   | 0.61835 | 0.47227 | 0.934 | 0.95 | 1 | HC_vs_MS.NoTrt_F |
| GSPT1    | 0.61856 | 0.30834 | 0.601 | 0.61 | 1 | HC_vs_MS.NoTrt_F |
| CCT6B    | 0.61866 | 0.66497 | 0.312 | 0.33 | 1 | HC_vs_MS.NoTrt_F |

|         |         |         |       |      |   |                  |
|---------|---------|---------|-------|------|---|------------------|
| CUL2    | 0.61903 | 0.56511 | 0.272 | 0.29 | 1 | HC_vs_MS.NoTrt_F |
| HYAL1   | 0.61925 | -0.3631 | 0.376 | 0.4  | 1 | HC_vs_MS.NoTrt_F |
| TTC28   | 0.61999 | -0.3451 | 0.46  | 0.44 | 1 | HC_vs_MS.NoTrt_F |
| NADK2   | 0.62022 | -0.9597 | 0.5   | 0.48 | 1 | HC_vs_MS.NoTrt_F |
| CREG1   | 0.62044 | 0.67116 | 0.355 | 0.38 | 1 | HC_vs_MS.NoTrt_F |
| NR4A1   | 0.62053 | 1.20789 | 0.569 | 0.57 | 1 | HC_vs_MS.NoTrt_F |
| WDR19   | 0.62058 | 0.77448 | 0.601 | 0.61 | 1 | HC_vs_MS.NoTrt_F |
| ANKRD54 | 0.62094 | 0.56941 | 0.754 | 0.8  | 1 | HC_vs_MS.NoTrt_F |
| PON2    | 0.62135 | 1.02763 | 0.442 | 0.46 | 1 | HC_vs_MS.NoTrt_F |
| ACE     | 0.62141 | 0.31781 | 0.647 | 0.7  | 1 | HC_vs_MS.NoTrt_F |
| SLC35B1 | 0.62173 | 0.3895  | 0.708 | 0.72 | 1 | HC_vs_MS.NoTrt_F |
| MCCC2   | 0.62218 | 0.6442  | 0.734 | 0.75 | 1 | HC_vs_MS.NoTrt_F |
| HAVCR1  | 0.62226 | 0.66535 | 0.373 | 0.39 | 1 | HC_vs_MS.NoTrt_F |
| PLEKHH3 | 0.62257 | 0.2882  | 0.633 | 0.6  | 1 | HC_vs_MS.NoTrt_F |
| ST3GAL3 | 0.62258 | 0.39147 | 0.832 | 0.89 | 1 | HC_vs_MS.NoTrt_F |
| SCLT1   | 0.6232  | 0.87841 | 0.673 | 0.67 | 1 | HC_vs_MS.NoTrt_F |
| LIPT2   | 0.62341 | 0.80099 | 0.173 | 0.2  | 1 | HC_vs_MS.NoTrt_F |
| MRPS10  | 0.62342 | 0.50113 | 0.538 | 0.5  | 1 | HC_vs_MS.NoTrt_F |
| FAM200A | 0.62374 | 0.84587 | 0.246 | 0.26 | 1 | HC_vs_MS.NoTrt_F |
| GADD45B | 0.62387 | 0.58869 | 0.22  | 0.25 | 1 | HC_vs_MS.NoTrt_F |
| CREB3L4 | 0.62443 | 0.41632 | 0.405 | 0.44 | 1 | HC_vs_MS.NoTrt_F |
| RIC3    | 0.62448 | 0.27564 | 0.488 | 0.52 | 1 | HC_vs_MS.NoTrt_F |
| BCR     | 0.62449 | 0.99402 | 0.341 | 0.32 | 1 | HC_vs_MS.NoTrt_F |
| ACSL1   | 0.62455 | 0.29539 | 0.28  | 0.29 | 1 | HC_vs_MS.NoTrt_F |
| PPP6C   | 0.6247  | 0.33181 | 0.272 | 0.3  | 1 | HC_vs_MS.NoTrt_F |
| PLXDC1  | 0.62481 | 0.49771 | 0.731 | 0.75 | 1 | HC_vs_MS.NoTrt_F |
| VPS37B  | 0.62524 | 0.59521 | 0.694 | 0.74 | 1 | HC_vs_MS.NoTrt_F |
| ETV6    | 0.62532 | 0.31429 | 0.246 | 0.27 | 1 | HC_vs_MS.NoTrt_F |
| RBM43   | 0.62541 | -0.3346 | 0.682 | 0.66 | 1 | HC_vs_MS.NoTrt_F |
| TGIF1   | 0.62558 | 0.53589 | 0.315 | 0.35 | 1 | HC_vs_MS.NoTrt_F |
| LAMP2   | 0.62575 | -0.2556 | 0.564 | 0.55 | 1 | HC_vs_MS.NoTrt_F |
| ZNF707  | 0.6262  | 0.61675 | 0.821 | 0.79 | 1 | HC_vs_MS.NoTrt_F |
| B3GAT1  | 0.62691 | 0.47212 | 0.312 | 0.35 | 1 | HC_vs_MS.NoTrt_F |
| NR1H2   | 0.62708 | 0.69891 | 0.564 | 0.61 | 1 | HC_vs_MS.NoTrt_F |
| TPX2    | 0.62737 | 0.39361 | 0.286 | 0.27 | 1 | HC_vs_MS.NoTrt_F |
| IRF2BPL | 0.62808 | 0.45237 | 0.474 | 0.51 | 1 | HC_vs_MS.NoTrt_F |
| PI4KB   | 0.62842 | 0.58169 | 0.251 | 0.28 | 1 | HC_vs_MS.NoTrt_F |
| PLEKHH2 | 0.62849 | 0.79101 | 0.697 | 0.69 | 1 | HC_vs_MS.NoTrt_F |
| MLPH    | 0.62882 | 1.17654 | 0.514 | 0.52 | 1 | HC_vs_MS.NoTrt_F |
| CNR2    | 0.62887 | 0.43265 | 0.844 | 0.9  | 1 | HC_vs_MS.NoTrt_F |

|           |         |         |       |      |   |                  |
|-----------|---------|---------|-------|------|---|------------------|
| CDC6      | 0.6295  | -0.3201 | 0.301 | 0.32 | 1 | HC_vs_MS.NoTrt_F |
| THAP12    | 0.62973 | -0.7355 | 0.679 | 0.66 | 1 | HC_vs_MS.NoTrt_F |
| SEMA4C    | 0.63054 | 0.79138 | 0.801 | 0.84 | 1 | HC_vs_MS.NoTrt_F |
| MBNL2     | 0.63073 | 0.8293  | 0.315 | 0.3  | 1 | HC_vs_MS.NoTrt_F |
| BLMH      | 0.63125 | -0.7635 | 0.65  | 0.7  | 1 | HC_vs_MS.NoTrt_F |
| LRP2BP    | 0.6316  | 0.38177 | 0.48  | 0.49 | 1 | HC_vs_MS.NoTrt_F |
| CHGB      | 0.6324  | 0.46928 | 0.5   | 0.49 | 1 | HC_vs_MS.NoTrt_F |
| ERICH3    | 0.63269 | 1.35229 | 0.118 | 0.14 | 1 | HC_vs_MS.NoTrt_F |
| SPHK1     | 0.63278 | -0.4895 | 0.223 | 0.2  | 1 | HC_vs_MS.NoTrt_F |
| ST6GALNAC | 0.63323 | 0.89359 | 0.257 | 0.26 | 1 | HC_vs_MS.NoTrt_F |
| SIK3      | 0.63337 | 0.76073 | 0.367 | 0.39 | 1 | HC_vs_MS.NoTrt_F |
| CD40LG    | 0.63342 | 1.02457 | 0.266 | 0.29 | 1 | HC_vs_MS.NoTrt_F |
| COA5      | 0.63499 | -0.5164 | 0.52  | 0.51 | 1 | HC_vs_MS.NoTrt_F |
| YIF1A     | 0.63676 | 0.88158 | 0.173 | 0.2  | 1 | HC_vs_MS.NoTrt_F |
| IL10RB    | 0.63682 | 1.11029 | 0.523 | 0.51 | 1 | HC_vs_MS.NoTrt_F |
| HLA-DRB4  | 0.63725 | 0.97987 | 0.124 | 0.14 | 1 | HC_vs_MS.NoTrt_F |
| KLHL18    | 0.63727 | 0.81255 | 0.399 | 0.42 | 1 | HC_vs_MS.NoTrt_F |
| ENTPD5    | 0.63747 | 0.82234 | 0.497 | 0.53 | 1 | HC_vs_MS.NoTrt_F |
| TNFRSF25  | 0.63836 | 0.33068 | 0.717 | 0.75 | 1 | HC_vs_MS.NoTrt_F |
| CD34      | 0.63841 | 0.29949 | 0.665 | 0.69 | 1 | HC_vs_MS.NoTrt_F |
| RBM47     | 0.63857 | 0.4452  | 0.494 | 0.47 | 1 | HC_vs_MS.NoTrt_F |
| IGF1R     | 0.63908 | 1.78012 | 0.387 | 0.37 | 1 | HC_vs_MS.NoTrt_F |
| SIRPB2    | 0.63947 | 0.44359 | 0.416 | 0.44 | 1 | HC_vs_MS.NoTrt_F |
| TNFSF4    | 0.63965 | 0.7134  | 0.136 | 0.16 | 1 | HC_vs_MS.NoTrt_F |
| ST5       | 0.64003 | 0.42837 | 0.393 | 0.38 | 1 | HC_vs_MS.NoTrt_F |
| TSC22D2   | 0.6413  | 0.44453 | 0.488 | 0.48 | 1 | HC_vs_MS.NoTrt_F |
| TYW1      | 0.64166 | 0.26509 | 0.312 | 0.34 | 1 | HC_vs_MS.NoTrt_F |
| TOMM40    | 0.64171 | -0.3178 | 0.653 | 0.65 | 1 | HC_vs_MS.NoTrt_F |
| MED25     | 0.64175 | 0.5787  | 0.52  | 0.5  | 1 | HC_vs_MS.NoTrt_F |
| DDX3X     | 0.64238 | 0.50946 | 0.367 | 0.4  | 1 | HC_vs_MS.NoTrt_F |
| FILIP1L   | 0.64457 | 0.66496 | 0.442 | 0.42 | 1 | HC_vs_MS.NoTrt_F |
| TRAPPC11  | 0.64492 | 0.51368 | 0.474 | 0.5  | 1 | HC_vs_MS.NoTrt_F |
| ADCK1     | 0.64525 | -0.321  | 0.312 | 0.33 | 1 | HC_vs_MS.NoTrt_F |
| TGFBR1    | 0.64529 | 1.1925  | 0.162 | 0.18 | 1 | HC_vs_MS.NoTrt_F |
| SCN11A    | 0.64562 | 0.26746 | 0.419 | 0.46 | 1 | HC_vs_MS.NoTrt_F |
| WDR89     | 0.64587 | 0.96687 | 0.399 | 0.43 | 1 | HC_vs_MS.NoTrt_F |
| GTPBP3    | 0.64591 | 0.29044 | 0.711 | 0.75 | 1 | HC_vs_MS.NoTrt_F |
| PCNX1     | 0.64619 | 0.27576 | 0.861 | 0.86 | 1 | HC_vs_MS.NoTrt_F |
| DNAJB11   | 0.64629 | 0.38963 | 0.269 | 0.3  | 1 | HC_vs_MS.NoTrt_F |
| PRKDC     | 0.64643 | 0.73962 | 0.63  | 0.65 | 1 | HC_vs_MS.NoTrt_F |



|          |         |         |       |      |   |                  |
|----------|---------|---------|-------|------|---|------------------|
| TBRG1    | 0.64649 | 0.3143  | 0.737 | 0.74 | 1 | HC_vs_MS.NoTrt_F |
| SLX4IP   | 0.64707 | 0.2756  | 0.506 | 0.49 | 1 | HC_vs_MS.NoTrt_F |
| SEC16A   | 0.64737 | 0.60385 | 0.26  | 0.29 | 1 | HC_vs_MS.NoTrt_F |
| ZNF547   | 0.64811 | 0.80416 | 0.266 | 0.29 | 1 | HC_vs_MS.NoTrt_F |
| ZNF808   | 0.64853 | 0.42417 | 0.526 | 0.54 | 1 | HC_vs_MS.NoTrt_F |
| FADS2    | 0.64858 | 0.9546  | 0.59  | 0.58 | 1 | HC_vs_MS.NoTrt_F |
| RGPD4    | 0.64904 | 0.72676 | 0.217 | 0.21 | 1 | HC_vs_MS.NoTrt_F |
| TMEM53   | 0.64913 | -0.4552 | 0.364 | 0.34 | 1 | HC_vs_MS.NoTrt_F |
| LCOR     | 0.6496  | 0.6146  | 0.393 | 0.44 | 1 | HC_vs_MS.NoTrt_F |
| CPSF6    | 0.65056 | 0.4152  | 0.396 | 0.41 | 1 | HC_vs_MS.NoTrt_F |
| GRN      | 0.65121 | 0.9183  | 0.211 | 0.19 | 1 | HC_vs_MS.NoTrt_F |
| SUMF2    | 0.65151 | 0.28294 | 0.902 | 0.91 | 1 | HC_vs_MS.NoTrt_F |
| ZNF230   | 0.65165 | 0.73553 | 0.633 | 0.62 | 1 | HC_vs_MS.NoTrt_F |
| TMEM116  | 0.65213 | -0.2715 | 0.928 | 0.91 | 1 | HC_vs_MS.NoTrt_F |
| HMGCL    | 0.65231 | -0.3816 | 0.624 | 0.6  | 1 | HC_vs_MS.NoTrt_F |
| ADORA2A  | 0.6525  | 0.53521 | 0.237 | 0.27 | 1 | HC_vs_MS.NoTrt_F |
| POLN     | 0.65279 | -0.3114 | 0.691 | 0.72 | 1 | HC_vs_MS.NoTrt_F |
| TTL5     | 0.65326 | 0.49243 | 0.749 | 0.76 | 1 | HC_vs_MS.NoTrt_F |
| ZNF835   | 0.6549  | 0.40413 | 0.65  | 0.64 | 1 | HC_vs_MS.NoTrt_F |
| SAMSN1   | 0.6552  | 0.25532 | 0.555 | 0.56 | 1 | HC_vs_MS.NoTrt_F |
| NFIB     | 0.65521 | 1.51037 | 0.191 | 0.18 | 1 | HC_vs_MS.NoTrt_F |
| TGOLN2   | 0.65543 | 0.45966 | 0.653 | 0.72 | 1 | HC_vs_MS.NoTrt_F |
| NFS1     | 0.6556  | -0.4605 | 0.934 | 0.92 | 1 | HC_vs_MS.NoTrt_F |
| ARHGAP17 | 0.65567 | 0.64576 | 0.63  | 0.65 | 1 | HC_vs_MS.NoTrt_F |
| C16orf52 | 0.65571 | 0.85719 | 0.098 | 0.12 | 1 | HC_vs_MS.NoTrt_F |
| SLC39A8  | 0.65597 | -0.5621 | 0.384 | 0.39 | 1 | HC_vs_MS.NoTrt_F |
| KLHL3    | 0.65599 | 0.796   | 0.277 | 0.29 | 1 | HC_vs_MS.NoTrt_F |
| OSBPL10  | 0.65671 | 0.83979 | 0.468 | 0.5  | 1 | HC_vs_MS.NoTrt_F |
| PAAF1    | 0.65727 | -0.3252 | 0.98  | 0.99 | 1 | HC_vs_MS.NoTrt_F |
| ULK4     | 0.65787 | 0.80851 | 0.431 | 0.4  | 1 | HC_vs_MS.NoTrt_F |
| CIRBP    | 0.65896 | 0.36672 | 0.604 | 0.67 | 1 | HC_vs_MS.NoTrt_F |
| GOLGA8B  | 0.659   | 0.30244 | 0.821 | 0.82 | 1 | HC_vs_MS.NoTrt_F |
| WDFY2    | 0.65949 | 0.4822  | 0.645 | 0.65 | 1 | HC_vs_MS.NoTrt_F |
| ZNF727   | 0.66047 | 1.175   | 0.384 | 0.41 | 1 | HC_vs_MS.NoTrt_F |
| FAM102B  | 0.66126 | 1.10766 | 0.315 | 0.32 | 1 | HC_vs_MS.NoTrt_F |
| ZNF85    | 0.66127 | -0.674  | 0.72  | 0.74 | 1 | HC_vs_MS.NoTrt_F |
| TRAF3IP1 | 0.66186 | 0.32078 | 0.431 | 0.4  | 1 | HC_vs_MS.NoTrt_F |
| KCTD3    | 0.66197 | 0.32937 | 0.367 | 0.38 | 1 | HC_vs_MS.NoTrt_F |
| ZKSCAN4  | 0.66211 | -0.9402 | 0.572 | 0.54 | 1 | HC_vs_MS.NoTrt_F |
| DYRK1A   | 0.66239 | 0.80196 | 0.751 | 0.77 | 1 | HC_vs_MS.NoTrt_F |

|            |         |         |       |      |   |                  |
|------------|---------|---------|-------|------|---|------------------|
| STK38L     | 0.66277 | -0.6179 | 0.702 | 0.78 | 1 | HC_vs_MS.NoTrt_F |
| TMEM184C   | 0.66297 | 0.28903 | 0.592 | 0.6  | 1 | HC_vs_MS.NoTrt_F |
| C4orf22    | 0.66426 | 0.35567 | 0.451 | 0.45 | 1 | HC_vs_MS.NoTrt_F |
| ZFP14      | 0.66476 | 0.34471 | 0.887 | 0.9  | 1 | HC_vs_MS.NoTrt_F |
| OPRD1      | 0.6649  | 0.39088 | 0.855 | 0.88 | 1 | HC_vs_MS.NoTrt_F |
| ANGPTL4    | 0.66491 | 1.34338 | 0.35  | 0.35 | 1 | HC_vs_MS.NoTrt_F |
| NKIRAS1    | 0.66522 | -0.3278 | 0.298 | 0.28 | 1 | HC_vs_MS.NoTrt_F |
| PLOD1      | 0.66525 | -0.2795 | 0.691 | 0.66 | 1 | HC_vs_MS.NoTrt_F |
| ATP6V1D    | 0.66537 | 0.42043 | 0.607 | 0.66 | 1 | HC_vs_MS.NoTrt_F |
| NEDD4L     | 0.66558 | -0.5815 | 0.509 | 0.46 | 1 | HC_vs_MS.NoTrt_F |
| SLIT3      | 0.66561 | 0.97118 | 0.616 | 0.62 | 1 | HC_vs_MS.NoTrt_F |
| WDR54      | 0.66572 | 0.40332 | 0.592 | 0.58 | 1 | HC_vs_MS.NoTrt_F |
| SAP30BP    | 0.66582 | 0.37627 | 0.318 | 0.31 | 1 | HC_vs_MS.NoTrt_F |
| SMC6       | 0.66606 | 0.44698 | 0.54  | 0.56 | 1 | HC_vs_MS.NoTrt_F |
| TBCCD1     | 0.66661 | 0.32451 | 0.439 | 0.41 | 1 | HC_vs_MS.NoTrt_F |
| FAM120AOS  | 0.6672  | 0.56942 | 0.688 | 0.67 | 1 | HC_vs_MS.NoTrt_F |
| CEP152     | 0.66733 | -0.83   | 0.795 | 0.7  | 1 | HC_vs_MS.NoTrt_F |
| FAM65C     | 0.66735 | 0.48123 | 0.41  | 0.4  | 1 | HC_vs_MS.NoTrt_F |
| PLEKHM1    | 0.66758 | 0.32084 | 0.861 | 0.92 | 1 | HC_vs_MS.NoTrt_F |
| CEP170     | 0.66764 | 0.37609 | 0.572 | 0.59 | 1 | HC_vs_MS.NoTrt_F |
| SIRPB1     | 0.66822 | 1.55536 | 0.275 | 0.31 | 1 | HC_vs_MS.NoTrt_F |
| RP11-231C1 | 0.66825 | 0.60261 | 0.705 | 0.79 | 1 | HC_vs_MS.NoTrt_F |
| PHF21A     | 0.66837 | 0.35496 | 0.318 | 0.34 | 1 | HC_vs_MS.NoTrt_F |
| SLC14A1    | 0.66866 | 0.31832 | 0.552 | 0.54 | 1 | HC_vs_MS.NoTrt_F |
| RNF170     | 0.6693  | -0.3406 | 0.642 | 0.64 | 1 | HC_vs_MS.NoTrt_F |
| PRPF8      | 0.6699  | 0.36221 | 0.893 | 0.87 | 1 | HC_vs_MS.NoTrt_F |
| SLX1B      | 0.67001 | 0.28354 | 0.5   | 0.49 | 1 | HC_vs_MS.NoTrt_F |
| GAMT       | 0.67038 | 0.54219 | 0.63  | 0.61 | 1 | HC_vs_MS.NoTrt_F |
| NELFCD     | 0.67051 | 1.07915 | 0.598 | 0.59 | 1 | HC_vs_MS.NoTrt_F |
| TPMT       | 0.67057 | 0.49198 | 0.809 | 0.8  | 1 | HC_vs_MS.NoTrt_F |
| SLC25A40   | 0.67088 | -0.7105 | 0.364 | 0.38 | 1 | HC_vs_MS.NoTrt_F |
| CELF2      | 0.67097 | 0.35718 | 0.592 | 0.69 | 1 | HC_vs_MS.NoTrt_F |
| ZNF286B    | 0.67185 | 0.44637 | 0.558 | 0.53 | 1 | HC_vs_MS.NoTrt_F |
| ANKS3      | 0.67199 | 0.29244 | 0.818 | 0.79 | 1 | HC_vs_MS.NoTrt_F |
| JMJD6      | 0.67293 | 0.65956 | 0.494 | 0.46 | 1 | HC_vs_MS.NoTrt_F |
| LIN52      | 0.67295 | 0.32596 | 0.777 | 0.78 | 1 | HC_vs_MS.NoTrt_F |
| TBXAS1     | 0.67305 | 1.49245 | 0.434 | 0.46 | 1 | HC_vs_MS.NoTrt_F |
| IDE        | 0.67378 | 0.68991 | 0.564 | 0.55 | 1 | HC_vs_MS.NoTrt_F |
| KIF13B     | 0.6739  | 0.29425 | 0.159 | 0.18 | 1 | HC_vs_MS.NoTrt_F |
| INTS1      | 0.67394 | 0.42779 | 0.439 | 0.46 | 1 | HC_vs_MS.NoTrt_F |

|           |         |         |       |      |   |                  |
|-----------|---------|---------|-------|------|---|------------------|
| MRPL20    | 0.67494 | 0.32984 | 0.595 | 0.56 | 1 | HC_vs_MS.NoTrt_F |
| NRROS     | 0.67511 | 1.21567 | 0.173 | 0.19 | 1 | HC_vs_MS.NoTrt_F |
| SMARCAL1  | 0.67561 | 0.32394 | 0.743 | 0.74 | 1 | HC_vs_MS.NoTrt_F |
| SUZ12     | 0.67574 | 0.65123 | 0.717 | 0.71 | 1 | HC_vs_MS.NoTrt_F |
| NABP2     | 0.67615 | 0.56024 | 0.494 | 0.48 | 1 | HC_vs_MS.NoTrt_F |
| CERS2     | 0.67636 | 0.25074 | 0.298 | 0.27 | 1 | HC_vs_MS.NoTrt_F |
| HSPB1     | 0.67686 | 0.2761  | 0.436 | 0.44 | 1 | HC_vs_MS.NoTrt_F |
| CYB561    | 0.67699 | 0.88835 | 0.39  | 0.37 | 1 | HC_vs_MS.NoTrt_F |
| CCDC74A   | 0.67705 | 1.11928 | 0.289 | 0.32 | 1 | HC_vs_MS.NoTrt_F |
| NIT2      | 0.67744 | 0.30404 | 0.676 | 0.68 | 1 | HC_vs_MS.NoTrt_F |
| IGFL2     | 0.67797 | 0.2503  | 0.422 | 0.47 | 1 | HC_vs_MS.NoTrt_F |
| MAPK9     | 0.67824 | 0.31663 | 0.509 | 0.5  | 1 | HC_vs_MS.NoTrt_F |
| SLX4      | 0.67864 | -0.302  | 0.569 | 0.56 | 1 | HC_vs_MS.NoTrt_F |
| MNS1      | 0.68015 | 0.27795 | 0.234 | 0.23 | 1 | HC_vs_MS.NoTrt_F |
| TUBB4A    | 0.6805  | -0.4905 | 0.197 | 0.22 | 1 | HC_vs_MS.NoTrt_F |
| CCDC15    | 0.6807  | 0.89658 | 0.28  | 0.29 | 1 | HC_vs_MS.NoTrt_F |
| RCL1      | 0.6807  | 0.78381 | 0.546 | 0.52 | 1 | HC_vs_MS.NoTrt_F |
| SPPL2B    | 0.68071 | 0.29054 | 0.416 | 0.4  | 1 | HC_vs_MS.NoTrt_F |
| CARM1     | 0.68114 | -0.3096 | 0.194 | 0.22 | 1 | HC_vs_MS.NoTrt_F |
| SPDYE16   | 0.68148 | 0.52645 | 0.821 | 0.89 | 1 | HC_vs_MS.NoTrt_F |
| A1BG      | 0.68178 | 0.29652 | 0.902 | 0.87 | 1 | HC_vs_MS.NoTrt_F |
| MTIF2     | 0.68185 | 0.5453  | 0.408 | 0.41 | 1 | HC_vs_MS.NoTrt_F |
| PACS2     | 0.6819  | 0.47697 | 0.338 | 0.35 | 1 | HC_vs_MS.NoTrt_F |
| SCARF1    | 0.68302 | 0.58128 | 0.486 | 0.5  | 1 | HC_vs_MS.NoTrt_F |
| EGR3      | 0.68318 | 0.53146 | 0.28  | 0.3  | 1 | HC_vs_MS.NoTrt_F |
| RFC5      | 0.6834  | -0.2731 | 0.199 | 0.21 | 1 | HC_vs_MS.NoTrt_F |
| PSMB9     | 0.68354 | 0.43803 | 0.775 | 0.8  | 1 | HC_vs_MS.NoTrt_F |
| AHI1      | 0.68402 | 0.29147 | 0.428 | 0.41 | 1 | HC_vs_MS.NoTrt_F |
| DNAJB13   | 0.68404 | 0.38452 | 0.419 | 0.45 | 1 | HC_vs_MS.NoTrt_F |
| ACY1      | 0.68435 | 0.73663 | 0.627 | 0.62 | 1 | HC_vs_MS.NoTrt_F |
| FGGY      | 0.68515 | 0.39749 | 0.506 | 0.53 | 1 | HC_vs_MS.NoTrt_F |
| PRKAA1    | 0.68606 | 0.39297 | 0.902 | 0.95 | 1 | HC_vs_MS.NoTrt_F |
| C14orf119 | 0.68622 | -0.5538 | 0.595 | 0.56 | 1 | HC_vs_MS.NoTrt_F |
| TNFAIP8L1 | 0.6866  | -0.5137 | 0.882 | 0.87 | 1 | HC_vs_MS.NoTrt_F |
| SECISBP2  | 0.68682 | 0.32422 | 0.676 | 0.66 | 1 | HC_vs_MS.NoTrt_F |
| NIPAL1    | 0.68703 | -0.315  | 0.454 | 0.49 | 1 | HC_vs_MS.NoTrt_F |
| DDHD2     | 0.68765 | 0.50403 | 0.864 | 0.88 | 1 | HC_vs_MS.NoTrt_F |
| SPATA7    | 0.68789 | 0.26101 | 0.341 | 0.37 | 1 | HC_vs_MS.NoTrt_F |
| PSMB7     | 0.68822 | 0.2672  | 0.277 | 0.3  | 1 | HC_vs_MS.NoTrt_F |
| PITPNM2   | 0.68829 | 1.3165  | 0.445 | 0.48 | 1 | HC_vs_MS.NoTrt_F |

|          |         |         |       |      |   |                  |
|----------|---------|---------|-------|------|---|------------------|
| ASRGL1   | 0.68862 | 0.88878 | 0.607 | 0.63 | 1 | HC_vs_MS.NoTrt_F |
| CRK      | 0.6887  | 1.02123 | 0.639 | 0.69 | 1 | HC_vs_MS.NoTrt_F |
| SLX1A    | 0.68881 | 0.31439 | 0.546 | 0.56 | 1 | HC_vs_MS.NoTrt_F |
| 2-Mar    | 0.68882 | -0.3432 | 0.636 | 0.65 | 1 | HC_vs_MS.NoTrt_F |
| HDAC7    | 0.68903 | 0.70601 | 0.321 | 0.35 | 1 | HC_vs_MS.NoTrt_F |
| EFCAB13  | 0.68906 | -0.5912 | 0.327 | 0.35 | 1 | HC_vs_MS.NoTrt_F |
| SLC22A18 | 0.68945 | 0.4104  | 0.601 | 0.6  | 1 | HC_vs_MS.NoTrt_F |
| FAM3A    | 0.68977 | 0.44513 | 0.775 | 0.8  | 1 | HC_vs_MS.NoTrt_F |
| ZNF16    | 0.68995 | 0.57561 | 0.809 | 0.83 | 1 | HC_vs_MS.NoTrt_F |
| TRIM16   | 0.69001 | -0.7549 | 0.497 | 0.49 | 1 | HC_vs_MS.NoTrt_F |
| VPS13A   | 0.6902  | 0.52786 | 0.367 | 0.38 | 1 | HC_vs_MS.NoTrt_F |
| IL12RB2  | 0.69088 | 1.47038 | 0.162 | 0.16 | 1 | HC_vs_MS.NoTrt_F |
| ZNF664   | 0.69088 | 0.73821 | 0.301 | 0.34 | 1 | HC_vs_MS.NoTrt_F |
| MAN2C1   | 0.69119 | 0.31008 | 0.847 | 0.85 | 1 | HC_vs_MS.NoTrt_F |
| DST      | 0.69143 | 0.35812 | 0.757 | 0.8  | 1 | HC_vs_MS.NoTrt_F |
| PCGF6    | 0.69265 | -0.399  | 0.792 | 0.79 | 1 | HC_vs_MS.NoTrt_F |
| TBC1D32  | 0.6927  | 1.20839 | 0.564 | 0.53 | 1 | HC_vs_MS.NoTrt_F |
| ZNF157   | 0.69277 | -0.3326 | 0.803 | 0.83 | 1 | HC_vs_MS.NoTrt_F |
| C11orf31 | 0.6932  | 0.26897 | 0.575 | 0.57 | 1 | HC_vs_MS.NoTrt_F |
| EXOSC6   | 0.69563 | 0.30157 | 0.928 | 0.96 | 1 | HC_vs_MS.NoTrt_F |
| AKR1B15  | 0.69743 | 0.26291 | 0.618 | 0.67 | 1 | HC_vs_MS.NoTrt_F |
| ZNF43    | 0.69808 | 0.34667 | 0.772 | 0.79 | 1 | HC_vs_MS.NoTrt_F |
| SLC24A1  | 0.69829 | -0.7334 | 0.529 | 0.51 | 1 | HC_vs_MS.NoTrt_F |
| MBD3     | 0.69861 | 1.09661 | 0.775 | 0.77 | 1 | HC_vs_MS.NoTrt_F |
| MTMR9    | 0.6987  | 0.57062 | 0.361 | 0.39 | 1 | HC_vs_MS.NoTrt_F |
| TBC1D17  | 0.69891 | -0.2849 | 0.893 | 0.89 | 1 | HC_vs_MS.NoTrt_F |
| ZNF559   | 0.6992  | 0.36099 | 0.685 | 0.71 | 1 | HC_vs_MS.NoTrt_F |
| URI1     | 0.69925 | 0.5167  | 0.269 | 0.29 | 1 | HC_vs_MS.NoTrt_F |
| GNL2     | 0.69962 | 0.31701 | 0.76  | 0.73 | 1 | HC_vs_MS.NoTrt_F |
| HSD17B7  | 0.69964 | -0.4546 | 0.598 | 0.64 | 1 | HC_vs_MS.NoTrt_F |
| ZDHHC21  | 0.69968 | -0.3345 | 0.301 | 0.32 | 1 | HC_vs_MS.NoTrt_F |
| SGSH     | 0.69985 | 0.60329 | 0.558 | 0.61 | 1 | HC_vs_MS.NoTrt_F |
| MMS19    | 0.70004 | 0.4842  | 0.225 | 0.25 | 1 | HC_vs_MS.NoTrt_F |
| TUBA1A   | 0.70004 | 0.5093  | 0.361 | 0.36 | 1 | HC_vs_MS.NoTrt_F |
| GPCPD1   | 0.70008 | 0.64518 | 0.445 | 0.48 | 1 | HC_vs_MS.NoTrt_F |
| STAR     | 0.70105 | 0.35664 | 0.286 | 0.3  | 1 | HC_vs_MS.NoTrt_F |
| TTC37    | 0.70195 | 0.3048  | 0.413 | 0.43 | 1 | HC_vs_MS.NoTrt_F |
| RRP36    | 0.70203 | 0.25488 | 0.514 | 0.48 | 1 | HC_vs_MS.NoTrt_F |
| CIC      | 0.70206 | 0.53422 | 0.15  | 0.17 | 1 | HC_vs_MS.NoTrt_F |
| ZNF516   | 0.70232 | 1.44996 | 0.107 | 0.12 | 1 | HC_vs_MS.NoTrt_F |

|          |         |         |       |      |   |                  |
|----------|---------|---------|-------|------|---|------------------|
| MAP2K6   | 0.70245 | 0.87178 | 0.408 | 0.44 | 1 | HC_vs_MS.NoTrt_F |
| IFIT3    | 0.70261 | -1.047  | 0.581 | 0.55 | 1 | HC_vs_MS.NoTrt_F |
| DYNLRB1  | 0.70312 | 0.51276 | 0.269 | 0.31 | 1 | HC_vs_MS.NoTrt_F |
| AP3S2    | 0.7032  | -0.3675 | 0.725 | 0.75 | 1 | HC_vs_MS.NoTrt_F |
| IDS      | 0.70357 | 0.27763 | 0.879 | 0.88 | 1 | HC_vs_MS.NoTrt_F |
| IBTK     | 0.70388 | -0.533  | 0.613 | 0.62 | 1 | HC_vs_MS.NoTrt_F |
| LRRC56   | 0.70389 | -0.2856 | 0.436 | 0.38 | 1 | HC_vs_MS.NoTrt_F |
| MORN3    | 0.70393 | -0.2506 | 0.882 | 0.87 | 1 | HC_vs_MS.NoTrt_F |
| RIPK2    | 0.70421 | 0.66469 | 0.22  | 0.23 | 1 | HC_vs_MS.NoTrt_F |
| BRIP1    | 0.70425 | -0.4465 | 0.876 | 0.87 | 1 | HC_vs_MS.NoTrt_F |
| SMYD4    | 0.7049  | -0.2785 | 0.855 | 0.87 | 1 | HC_vs_MS.NoTrt_F |
| ZNF493   | 0.70496 | 0.6658  | 0.821 | 0.8  | 1 | HC_vs_MS.NoTrt_F |
| GALNT6   | 0.70503 | 0.70288 | 0.78  | 0.81 | 1 | HC_vs_MS.NoTrt_F |
| LASP1    | 0.70511 | -0.3643 | 0.78  | 0.82 | 1 | HC_vs_MS.NoTrt_F |
| P4HA2    | 0.70552 | 0.87217 | 0.514 | 0.53 | 1 | HC_vs_MS.NoTrt_F |
| 1-Mar    | 0.70578 | 0.36166 | 0.639 | 0.66 | 1 | HC_vs_MS.NoTrt_F |
| PRKCA    | 0.70579 | 0.28837 | 0.775 | 0.76 | 1 | HC_vs_MS.NoTrt_F |
| ARSK     | 0.70585 | 0.59875 | 0.604 | 0.61 | 1 | HC_vs_MS.NoTrt_F |
| COBLL1   | 0.70612 | 0.25167 | 0.598 | 0.58 | 1 | HC_vs_MS.NoTrt_F |
| SPICE1   | 0.70635 | 0.57015 | 0.324 | 0.34 | 1 | HC_vs_MS.NoTrt_F |
| ZBED1    | 0.70652 | -0.2575 | 0.546 | 0.55 | 1 | HC_vs_MS.NoTrt_F |
| GDPD5    | 0.70661 | 1.13426 | 0.332 | 0.34 | 1 | HC_vs_MS.NoTrt_F |
| PLBD2    | 0.70746 | 0.58211 | 0.41  | 0.43 | 1 | HC_vs_MS.NoTrt_F |
| EPT1     | 0.70753 | 0.35437 | 0.431 | 0.4  | 1 | HC_vs_MS.NoTrt_F |
| MKL2     | 0.70766 | -0.4002 | 0.769 | 0.8  | 1 | HC_vs_MS.NoTrt_F |
| PBX3     | 0.70806 | 0.89361 | 0.116 | 0.13 | 1 | HC_vs_MS.NoTrt_F |
| GSE1     | 0.70825 | 1.42186 | 0.454 | 0.46 | 1 | HC_vs_MS.NoTrt_F |
| TRIM26   | 0.70853 | 0.61314 | 0.249 | 0.28 | 1 | HC_vs_MS.NoTrt_F |
| C11orf63 | 0.70993 | 0.70815 | 0.523 | 0.51 | 1 | HC_vs_MS.NoTrt_F |
| HPS5     | 0.7101  | -0.5475 | 0.795 | 0.82 | 1 | HC_vs_MS.NoTrt_F |
| LMCD1    | 0.71043 | 1.47032 | 0.37  | 0.39 | 1 | HC_vs_MS.NoTrt_F |
| RAB8B    | 0.71051 | 0.29556 | 0.399 | 0.39 | 1 | HC_vs_MS.NoTrt_F |
| SNUPN    | 0.71071 | -0.3795 | 0.887 | 0.92 | 1 | HC_vs_MS.NoTrt_F |
| XPNPEP1  | 0.71091 | 0.42073 | 0.431 | 0.43 | 1 | HC_vs_MS.NoTrt_F |
| PM20D2   | 0.71119 | 0.44563 | 0.78  | 0.85 | 1 | HC_vs_MS.NoTrt_F |
| ZZEF1    | 0.71139 | 0.51497 | 0.592 | 0.58 | 1 | HC_vs_MS.NoTrt_F |
| GAB1     | 0.71157 | 0.60084 | 0.587 | 0.6  | 1 | HC_vs_MS.NoTrt_F |
| ZNF708   | 0.71168 | 0.45351 | 0.827 | 0.85 | 1 | HC_vs_MS.NoTrt_F |
| POC1B    | 0.71181 | 0.4103  | 0.812 | 0.83 | 1 | HC_vs_MS.NoTrt_F |
| GAPVD1   | 0.71249 | 0.26182 | 0.855 | 0.85 | 1 | HC_vs_MS.NoTrt_F |

|           |         |         |       |      |   |                  |
|-----------|---------|---------|-------|------|---|------------------|
| PRR12     | 0.71312 | 1.25445 | 0.133 | 0.16 | 1 | HC_vs_MS.NoTrt_F |
| RALBP1    | 0.71325 | 0.53679 | 0.454 | 0.44 | 1 | HC_vs_MS.NoTrt_F |
| DRG1      | 0.71413 | 0.96938 | 0.228 | 0.25 | 1 | HC_vs_MS.NoTrt_F |
| ZNF343    | 0.71444 | 0.30001 | 0.52  | 0.54 | 1 | HC_vs_MS.NoTrt_F |
| CTBP1     | 0.71445 | 0.64048 | 0.532 | 0.56 | 1 | HC_vs_MS.NoTrt_F |
| AKR1C1    | 0.71476 | 0.43641 | 0.306 | 0.31 | 1 | HC_vs_MS.NoTrt_F |
| PRKD2     | 0.71476 | 0.45196 | 0.769 | 0.79 | 1 | HC_vs_MS.NoTrt_F |
| KIF21A    | 0.71524 | 0.72299 | 0.22  | 0.25 | 1 | HC_vs_MS.NoTrt_F |
| DCN       | 0.71591 | 0.84425 | 0.749 | 0.77 | 1 | HC_vs_MS.NoTrt_F |
| LRRN4CL   | 0.71594 | 0.268   | 0.598 | 0.59 | 1 | HC_vs_MS.NoTrt_F |
| SPIN1     | 0.71595 | 0.72324 | 0.228 | 0.24 | 1 | HC_vs_MS.NoTrt_F |
| GP6       | 0.71602 | 0.6306  | 0.486 | 0.53 | 1 | HC_vs_MS.NoTrt_F |
| GSR       | 0.71767 | 0.48416 | 0.329 | 0.32 | 1 | HC_vs_MS.NoTrt_F |
| STXBP4    | 0.71771 | 0.57598 | 0.584 | 0.59 | 1 | HC_vs_MS.NoTrt_F |
| TMEM256-P | 0.7178  | 0.42662 | 0.48  | 0.53 | 1 | HC_vs_MS.NoTrt_F |
| POU6F1    | 0.71786 | -0.3644 | 0.558 | 0.54 | 1 | HC_vs_MS.NoTrt_F |
| SHISA2    | 0.71798 | 0.35796 | 0.298 | 0.33 | 1 | HC_vs_MS.NoTrt_F |
| PATL2     | 0.71879 | 0.45966 | 0.431 | 0.43 | 1 | HC_vs_MS.NoTrt_F |
| RGS16     | 0.71896 | 1.11171 | 0.113 | 0.13 | 1 | HC_vs_MS.NoTrt_F |
| MGA       | 0.7195  | -0.639  | 0.908 | 0.89 | 1 | HC_vs_MS.NoTrt_F |
| CD83      | 0.71968 | 1.07642 | 0.179 | 0.18 | 1 | HC_vs_MS.NoTrt_F |
| MLLT6     | 0.71978 | 0.3486  | 0.913 | 0.91 | 1 | HC_vs_MS.NoTrt_F |
| PARP2     | 0.71984 | 1.18116 | 0.436 | 0.42 | 1 | HC_vs_MS.NoTrt_F |
| FRYL      | 0.72037 | 0.44922 | 0.792 | 0.89 | 1 | HC_vs_MS.NoTrt_F |
| SEMA6D    | 0.7204  | 1.35698 | 0.147 | 0.17 | 1 | HC_vs_MS.NoTrt_F |
| LSR       | 0.72048 | 0.78932 | 0.237 | 0.26 | 1 | HC_vs_MS.NoTrt_F |
| PHTF2     | 0.72052 | 0.76269 | 0.552 | 0.57 | 1 | HC_vs_MS.NoTrt_F |
| TALDO1    | 0.72068 | 0.25172 | 0.743 | 0.76 | 1 | HC_vs_MS.NoTrt_F |
| ZNF341    | 0.72072 | -0.3189 | 0.486 | 0.49 | 1 | HC_vs_MS.NoTrt_F |
| C1orf159  | 0.7208  | 1.50723 | 0.208 | 0.23 | 1 | HC_vs_MS.NoTrt_F |
| GALNT15   | 0.72118 | 0.42782 | 0.37  | 0.38 | 1 | HC_vs_MS.NoTrt_F |
| DCPS      | 0.72127 | 0.28029 | 0.509 | 0.51 | 1 | HC_vs_MS.NoTrt_F |
| PITPNM1   | 0.72197 | 0.47576 | 0.306 | 0.32 | 1 | HC_vs_MS.NoTrt_F |
| MTFMT     | 0.72239 | 0.29617 | 0.867 | 0.92 | 1 | HC_vs_MS.NoTrt_F |
| ERAL1     | 0.72256 | 0.82659 | 0.153 | 0.17 | 1 | HC_vs_MS.NoTrt_F |
| EMP1      | 0.72257 | 1.31693 | 0.225 | 0.25 | 1 | HC_vs_MS.NoTrt_F |
| KAZN      | 0.72263 | 0.74446 | 0.558 | 0.57 | 1 | HC_vs_MS.NoTrt_F |
| MOCOS     | 0.72271 | 0.43565 | 0.656 | 0.68 | 1 | HC_vs_MS.NoTrt_F |
| FLG2      | 0.72283 | -0.5711 | 0.532 | 0.5  | 1 | HC_vs_MS.NoTrt_F |
| ERBB3     | 0.72317 | 0.35341 | 0.803 | 0.82 | 1 | HC_vs_MS.NoTrt_F |

|          |         |         |       |      |   |                  |
|----------|---------|---------|-------|------|---|------------------|
| CTDSPL2  | 0.72317 | -0.4889 | 0.723 | 0.76 | 1 | HC_vs_MS.NoTrt_F |
| TYK2     | 0.72319 | 0.67608 | 0.665 | 0.74 | 1 | HC_vs_MS.NoTrt_F |
| PRKAG2   | 0.72361 | 0.72861 | 0.422 | 0.44 | 1 | HC_vs_MS.NoTrt_F |
| ZNRF3    | 0.72373 | -0.2634 | 0.367 | 0.34 | 1 | HC_vs_MS.NoTrt_F |
| CPT1A    | 0.72389 | 0.62894 | 0.746 | 0.7  | 1 | HC_vs_MS.NoTrt_F |
| CEP97    | 0.72433 | 0.59114 | 0.734 | 0.78 | 1 | HC_vs_MS.NoTrt_F |
| MOAP1    | 0.72449 | 0.53976 | 0.413 | 0.42 | 1 | HC_vs_MS.NoTrt_F |
| DIS3L2   | 0.72494 | 0.4389  | 0.569 | 0.57 | 1 | HC_vs_MS.NoTrt_F |
| HCFC1    | 0.72519 | 0.51493 | 0.341 | 0.38 | 1 | HC_vs_MS.NoTrt_F |
| WDR78    | 0.7254  | -0.2791 | 0.529 | 0.54 | 1 | HC_vs_MS.NoTrt_F |
| SSH2     | 0.72548 | 0.34969 | 0.801 | 0.86 | 1 | HC_vs_MS.NoTrt_F |
| CD320    | 0.72577 | 0.44748 | 0.766 | 0.8  | 1 | HC_vs_MS.NoTrt_F |
| FSTL4    | 0.72581 | 0.29134 | 0.246 | 0.27 | 1 | HC_vs_MS.NoTrt_F |
| TRIM45   | 0.72607 | 0.31326 | 0.156 | 0.17 | 1 | HC_vs_MS.NoTrt_F |
| GPR89A   | 0.72637 | 0.54998 | 0.48  | 0.52 | 1 | HC_vs_MS.NoTrt_F |
| COMMD4   | 0.72644 | 0.36316 | 0.945 | 0.95 | 1 | HC_vs_MS.NoTrt_F |
| UAP1L1   | 0.72765 | 0.86184 | 0.355 | 0.36 | 1 | HC_vs_MS.NoTrt_F |
| MNT      | 0.72786 | 0.34671 | 0.711 | 0.7  | 1 | HC_vs_MS.NoTrt_F |
| TADA2A   | 0.72787 | -0.4798 | 0.919 | 0.92 | 1 | HC_vs_MS.NoTrt_F |
| OXCT1    | 0.72846 | 1.25642 | 0.408 | 0.46 | 1 | HC_vs_MS.NoTrt_F |
| CCDC114  | 0.72934 | -0.7025 | 0.494 | 0.49 | 1 | HC_vs_MS.NoTrt_F |
| C9orf85  | 0.72941 | 0.2603  | 0.919 | 0.93 | 1 | HC_vs_MS.NoTrt_F |
| UBB      | 0.72945 | 0.30648 | 0.621 | 0.73 | 1 | HC_vs_MS.NoTrt_F |
| SLC35E1  | 0.72963 | 0.30881 | 0.991 | 0.97 | 1 | HC_vs_MS.NoTrt_F |
| MREG     | 0.7304  | 0.39681 | 0.668 | 0.66 | 1 | HC_vs_MS.NoTrt_F |
| ZNF417   | 0.73074 | 0.74031 | 0.769 | 0.75 | 1 | HC_vs_MS.NoTrt_F |
| ZNF684   | 0.73239 | -0.2836 | 0.751 | 0.74 | 1 | HC_vs_MS.NoTrt_F |
| CHDH     | 0.73253 | -0.6863 | 0.572 | 0.55 | 1 | HC_vs_MS.NoTrt_F |
| TMEM220  | 0.7329  | 0.30124 | 0.572 | 0.56 | 1 | HC_vs_MS.NoTrt_F |
| HTN3     | 0.73359 | 0.37791 | 0.659 | 0.69 | 1 | HC_vs_MS.NoTrt_F |
| LRWD1    | 0.73377 | 0.49832 | 0.61  | 0.59 | 1 | HC_vs_MS.NoTrt_F |
| SLC35B4  | 0.73449 | 0.70388 | 0.587 | 0.59 | 1 | HC_vs_MS.NoTrt_F |
| BTA1F1   | 0.735   | 0.31813 | 0.347 | 0.37 | 1 | HC_vs_MS.NoTrt_F |
| TARSL2   | 0.73535 | 0.34703 | 0.974 | 0.98 | 1 | HC_vs_MS.NoTrt_F |
| CPD      | 0.7359  | 0.52629 | 0.743 | 0.77 | 1 | HC_vs_MS.NoTrt_F |
| MED22    | 0.73669 | 0.47051 | 0.613 | 0.6  | 1 | HC_vs_MS.NoTrt_F |
| CDK5RAP1 | 0.737   | 0.32628 | 0.48  | 0.45 | 1 | HC_vs_MS.NoTrt_F |
| UBOX5    | 0.73738 | -0.2566 | 0.682 | 0.66 | 1 | HC_vs_MS.NoTrt_F |
| ZNF879   | 0.7378  | 0.54907 | 0.367 | 0.35 | 1 | HC_vs_MS.NoTrt_F |
| STARD4   | 0.7381  | 0.41601 | 0.211 | 0.19 | 1 | HC_vs_MS.NoTrt_F |

|          |         |         |       |      |   |                  |
|----------|---------|---------|-------|------|---|------------------|
| FGFR2    | 0.73812 | 0.28368 | 0.509 | 0.51 | 1 | HC_vs_MS.NoTrt_F |
| XPA      | 0.73822 | 1.20798 | 0.208 | 0.23 | 1 | HC_vs_MS.NoTrt_F |
| RNF130   | 0.73835 | 0.40654 | 0.723 | 0.69 | 1 | HC_vs_MS.NoTrt_F |
| CNP      | 0.73837 | 0.30412 | 0.783 | 0.74 | 1 | HC_vs_MS.NoTrt_F |
| NUDC     | 0.73902 | -0.2671 | 0.668 | 0.62 | 1 | HC_vs_MS.NoTrt_F |
| KIF22    | 0.73904 | 0.60473 | 0.246 | 0.24 | 1 | HC_vs_MS.NoTrt_F |
| NFKBID   | 0.73942 | 0.39676 | 0.642 | 0.64 | 1 | HC_vs_MS.NoTrt_F |
| AGPAT3   | 0.73963 | 0.53751 | 0.694 | 0.68 | 1 | HC_vs_MS.NoTrt_F |
| ALG10B   | 0.74077 | -0.6263 | 0.725 | 0.67 | 1 | HC_vs_MS.NoTrt_F |
| PIP5K1C  | 0.74102 | 1.15707 | 0.13  | 0.14 | 1 | HC_vs_MS.NoTrt_F |
| VSIG1    | 0.74167 | 0.49771 | 0.633 | 0.65 | 1 | HC_vs_MS.NoTrt_F |
| AASS     | 0.74177 | 0.78219 | 0.422 | 0.44 | 1 | HC_vs_MS.NoTrt_F |
| OCEL1    | 0.74206 | 0.4043  | 0.514 | 0.51 | 1 | HC_vs_MS.NoTrt_F |
| CCNL1    | 0.74215 | 0.60644 | 0.445 | 0.5  | 1 | HC_vs_MS.NoTrt_F |
| PPP1R14D | 0.7425  | 0.27212 | 0.11  | 0.12 | 1 | HC_vs_MS.NoTrt_F |
| YTHDC2   | 0.74332 | 0.38475 | 0.506 | 0.51 | 1 | HC_vs_MS.NoTrt_F |
| TMEM199  | 0.74431 | -0.6151 | 0.702 | 0.7  | 1 | HC_vs_MS.NoTrt_F |
| SSR3     | 0.74457 | 0.38681 | 0.676 | 0.66 | 1 | HC_vs_MS.NoTrt_F |
| PRELID2  | 0.74546 | 0.72181 | 0.572 | 0.54 | 1 | HC_vs_MS.NoTrt_F |
| E2F3     | 0.74556 | 0.44115 | 0.225 | 0.24 | 1 | HC_vs_MS.NoTrt_F |
| SLC7A11  | 0.74571 | 0.26714 | 0.532 | 0.51 | 1 | HC_vs_MS.NoTrt_F |
| CSF1     | 0.74654 | 0.66164 | 0.176 | 0.19 | 1 | HC_vs_MS.NoTrt_F |
| NUP214   | 0.747   | 0.28358 | 0.694 | 0.74 | 1 | HC_vs_MS.NoTrt_F |
| HAUS5    | 0.74732 | -0.5064 | 0.523 | 0.51 | 1 | HC_vs_MS.NoTrt_F |
| LRCH1    | 0.74819 | 0.69192 | 0.159 | 0.15 | 1 | HC_vs_MS.NoTrt_F |
| MROH8    | 0.74835 | -0.5185 | 0.373 | 0.39 | 1 | HC_vs_MS.NoTrt_F |
| C1orf112 | 0.74895 | 0.30547 | 0.546 | 0.55 | 1 | HC_vs_MS.NoTrt_F |
| ADAM28   | 0.7496  | 0.52478 | 0.211 | 0.23 | 1 | HC_vs_MS.NoTrt_F |
| CCDC159  | 0.74973 | -0.5375 | 0.795 | 0.79 | 1 | HC_vs_MS.NoTrt_F |
| LRRC32   | 0.75026 | 1.58056 | 0.101 | 0.12 | 1 | HC_vs_MS.NoTrt_F |
| RERE     | 0.75039 | 0.66328 | 0.451 | 0.47 | 1 | HC_vs_MS.NoTrt_F |
| GPM6A    | 0.7508  | 0.70504 | 0.355 | 0.36 | 1 | HC_vs_MS.NoTrt_F |
| IRS2     | 0.75097 | 1.09472 | 0.477 | 0.49 | 1 | HC_vs_MS.NoTrt_F |
| BCKDHB   | 0.75133 | -0.537  | 0.656 | 0.65 | 1 | HC_vs_MS.NoTrt_F |
| PPP2R3A  | 0.75182 | 0.26597 | 0.798 | 0.81 | 1 | HC_vs_MS.NoTrt_F |
| CAMK1    | 0.75202 | 0.35441 | 0.561 | 0.59 | 1 | HC_vs_MS.NoTrt_F |
| GTPBP1   | 0.75233 | 0.46922 | 0.604 | 0.65 | 1 | HC_vs_MS.NoTrt_F |
| RANBP6   | 0.75256 | -0.7377 | 0.168 | 0.16 | 1 | HC_vs_MS.NoTrt_F |
| NIT1     | 0.75265 | 0.60717 | 0.676 | 0.69 | 1 | HC_vs_MS.NoTrt_F |
| LMOD3    | 0.75268 | -0.419  | 0.514 | 0.51 | 1 | HC_vs_MS.NoTrt_F |



|          |         |         |       |      |   |                  |
|----------|---------|---------|-------|------|---|------------------|
| GALE     | 0.75271 | 0.66966 | 0.405 | 0.4  | 1 | HC_vs_MS.NoTrt_F |
| DNAJC22  | 0.75383 | -0.3633 | 0.402 | 0.4  | 1 | HC_vs_MS.NoTrt_F |
| PRKCD    | 0.75426 | 0.25229 | 0.566 | 0.55 | 1 | HC_vs_MS.NoTrt_F |
| KCNJ5    | 0.75458 | 0.30367 | 0.673 | 0.65 | 1 | HC_vs_MS.NoTrt_F |
| ICA1L    | 0.75478 | 0.42816 | 0.812 | 0.81 | 1 | HC_vs_MS.NoTrt_F |
| ITPKB    | 0.75488 | 0.50533 | 0.63  | 0.62 | 1 | HC_vs_MS.NoTrt_F |
| ACSS3    | 0.75523 | 0.28459 | 0.298 | 0.32 | 1 | HC_vs_MS.NoTrt_F |
| RASEF    | 0.7556  | 0.3086  | 0.899 | 0.95 | 1 | HC_vs_MS.NoTrt_F |
| HES2     | 0.75635 | 0.27705 | 0.688 | 0.66 | 1 | HC_vs_MS.NoTrt_F |
| PLA2R1   | 0.75654 | 0.67505 | 0.592 | 0.54 | 1 | HC_vs_MS.NoTrt_F |
| CD37     | 0.75675 | 0.30085 | 0.798 | 0.86 | 1 | HC_vs_MS.NoTrt_F |
| CDC40    | 0.75679 | 0.34135 | 0.546 | 0.56 | 1 | HC_vs_MS.NoTrt_F |
| TNFSF9   | 0.75684 | 0.53145 | 0.11  | 0.11 | 1 | HC_vs_MS.NoTrt_F |
| UMPS     | 0.75706 | -0.6716 | 0.688 | 0.7  | 1 | HC_vs_MS.NoTrt_F |
| KIAA2013 | 0.7574  | 0.59508 | 0.361 | 0.37 | 1 | HC_vs_MS.NoTrt_F |
| SMPD3    | 0.75757 | 0.46841 | 0.728 | 0.74 | 1 | HC_vs_MS.NoTrt_F |
| BAIAP2L1 | 0.75794 | 0.29322 | 0.587 | 0.57 | 1 | HC_vs_MS.NoTrt_F |
| CMTR2    | 0.75807 | 0.35254 | 0.321 | 0.31 | 1 | HC_vs_MS.NoTrt_F |
| ECE1     | 0.75811 | 0.3584  | 0.763 | 0.72 | 1 | HC_vs_MS.NoTrt_F |
| RASAL1   | 0.75846 | 0.84746 | 0.318 | 0.33 | 1 | HC_vs_MS.NoTrt_F |
| ABCB6    | 0.75875 | 0.25694 | 0.194 | 0.21 | 1 | HC_vs_MS.NoTrt_F |
| TGFBRAP1 | 0.75887 | 0.46534 | 0.535 | 0.55 | 1 | HC_vs_MS.NoTrt_F |
| DENND3   | 0.75901 | 1.08944 | 0.564 | 0.59 | 1 | HC_vs_MS.NoTrt_F |
| EI24     | 0.75928 | -0.3906 | 0.786 | 0.84 | 1 | HC_vs_MS.NoTrt_F |
| UBE4B    | 0.75949 | 1.22105 | 0.659 | 0.68 | 1 | HC_vs_MS.NoTrt_F |
| ENDOV    | 0.75997 | -0.3736 | 0.659 | 0.66 | 1 | HC_vs_MS.NoTrt_F |
| ASIC4    | 0.76019 | 0.28982 | 0.266 | 0.25 | 1 | HC_vs_MS.NoTrt_F |
| ZNF433   | 0.76049 | 0.632   | 0.185 | 0.2  | 1 | HC_vs_MS.NoTrt_F |
| APPL1    | 0.76153 | 0.37493 | 0.494 | 0.48 | 1 | HC_vs_MS.NoTrt_F |
| PCOLCE   | 0.76158 | 0.97095 | 0.133 | 0.13 | 1 | HC_vs_MS.NoTrt_F |
| CCDC77   | 0.76204 | -0.3885 | 0.714 | 0.7  | 1 | HC_vs_MS.NoTrt_F |
| RGPD8    | 0.76249 | 0.95713 | 0.327 | 0.37 | 1 | HC_vs_MS.NoTrt_F |
| RCOR1    | 0.76259 | 0.92041 | 0.225 | 0.22 | 1 | HC_vs_MS.NoTrt_F |
| ERLIN2   | 0.76417 | 0.49572 | 0.422 | 0.42 | 1 | HC_vs_MS.NoTrt_F |
| HILPDA   | 0.76434 | 0.5442  | 0.592 | 0.62 | 1 | HC_vs_MS.NoTrt_F |
| BRI3BP   | 0.76449 | 0.30467 | 0.902 | 0.95 | 1 | HC_vs_MS.NoTrt_F |
| S1PR5    | 0.76509 | 0.54129 | 0.121 | 0.13 | 1 | HC_vs_MS.NoTrt_F |
| TAF6     | 0.76512 | -0.6147 | 0.584 | 0.58 | 1 | HC_vs_MS.NoTrt_F |
| FBXO36   | 0.76543 | 0.55392 | 0.691 | 0.66 | 1 | HC_vs_MS.NoTrt_F |
| PTBP3    | 0.76548 | 0.31719 | 0.425 | 0.46 | 1 | HC_vs_MS.NoTrt_F |

|          |         |         |       |      |   |                  |
|----------|---------|---------|-------|------|---|------------------|
| RSRC1    | 0.76558 | 0.34426 | 0.757 | 0.76 | 1 | HC_vs_MS.NoTrt_F |
| TAF8     | 0.76591 | -0.5106 | 0.971 | 0.97 | 1 | HC_vs_MS.NoTrt_F |
| PTBP1    | 0.76664 | 0.44787 | 0.303 | 0.33 | 1 | HC_vs_MS.NoTrt_F |
| CLEC4C   | 0.76736 | 0.28673 | 0.442 | 0.45 | 1 | HC_vs_MS.NoTrt_F |
| EGR1     | 0.76777 | 2.22425 | 0.121 | 0.12 | 1 | HC_vs_MS.NoTrt_F |
| RGR      | 0.76846 | 0.61744 | 0.529 | 0.51 | 1 | HC_vs_MS.NoTrt_F |
| ALMS1    | 0.76894 | 1.04252 | 0.517 | 0.48 | 1 | HC_vs_MS.NoTrt_F |
| FMN1     | 0.76917 | 0.70153 | 0.269 | 0.25 | 1 | HC_vs_MS.NoTrt_F |
| HSPBAP1  | 0.7696  | 0.80512 | 0.584 | 0.57 | 1 | HC_vs_MS.NoTrt_F |
| CRKL     | 0.76966 | 0.5012  | 0.607 | 0.64 | 1 | HC_vs_MS.NoTrt_F |
| TNFAIP2  | 0.76977 | 0.70061 | 0.39  | 0.39 | 1 | HC_vs_MS.NoTrt_F |
| KLC4     | 0.77049 | 0.31885 | 0.876 | 0.86 | 1 | HC_vs_MS.NoTrt_F |
| FKTN     | 0.77075 | 1.22807 | 0.199 | 0.22 | 1 | HC_vs_MS.NoTrt_F |
| DENND5B  | 0.77164 | 0.33578 | 0.642 | 0.63 | 1 | HC_vs_MS.NoTrt_F |
| KRR1     | 0.77238 | 0.35695 | 0.717 | 0.71 | 1 | HC_vs_MS.NoTrt_F |
| KDM6B    | 0.77373 | 0.5771  | 0.289 | 0.29 | 1 | HC_vs_MS.NoTrt_F |
| PPP1R16A | 0.77436 | 0.377   | 0.477 | 0.5  | 1 | HC_vs_MS.NoTrt_F |
| COL6A3   | 0.77449 | 2.01699 | 0.517 | 0.54 | 1 | HC_vs_MS.NoTrt_F |
| RASAL2   | 0.77484 | 0.75374 | 0.555 | 0.56 | 1 | HC_vs_MS.NoTrt_F |
| LMBR1    | 0.77527 | 0.74603 | 0.532 | 0.54 | 1 | HC_vs_MS.NoTrt_F |
| IFRD1    | 0.77535 | 0.72868 | 0.564 | 0.58 | 1 | HC_vs_MS.NoTrt_F |
| ZNF700   | 0.7754  | 0.42396 | 0.243 | 0.26 | 1 | HC_vs_MS.NoTrt_F |
| DPH6     | 0.77571 | 0.73156 | 0.477 | 0.45 | 1 | HC_vs_MS.NoTrt_F |
| MRPS34   | 0.77602 | 0.88956 | 0.254 | 0.29 | 1 | HC_vs_MS.NoTrt_F |
| NAPEPLD  | 0.77631 | 0.53739 | 0.384 | 0.38 | 1 | HC_vs_MS.NoTrt_F |
| ERLIN1   | 0.77643 | -0.3846 | 0.101 | 0.11 | 1 | HC_vs_MS.NoTrt_F |
| RPUSD4   | 0.77659 | -0.5812 | 0.749 | 0.8  | 1 | HC_vs_MS.NoTrt_F |
| SRSF10   | 0.7767  | 0.26587 | 0.806 | 0.83 | 1 | HC_vs_MS.NoTrt_F |
| ANO10    | 0.77676 | -0.8692 | 0.671 | 0.66 | 1 | HC_vs_MS.NoTrt_F |
| DCAKD    | 0.77677 | 0.69224 | 0.471 | 0.44 | 1 | HC_vs_MS.NoTrt_F |
| PHF20    | 0.77682 | 0.43735 | 0.598 | 0.61 | 1 | HC_vs_MS.NoTrt_F |
| PPP1CB   | 0.77706 | 0.32935 | 0.749 | 0.84 | 1 | HC_vs_MS.NoTrt_F |
| ATP5L2   | 0.77763 | 0.34171 | 0.353 | 0.36 | 1 | HC_vs_MS.NoTrt_F |
| ZCCHC4   | 0.77771 | -0.5356 | 0.691 | 0.7  | 1 | HC_vs_MS.NoTrt_F |
| TRMT12   | 0.77834 | -0.2656 | 0.512 | 0.5  | 1 | HC_vs_MS.NoTrt_F |
| TTC21B   | 0.77867 | 0.32214 | 0.416 | 0.41 | 1 | HC_vs_MS.NoTrt_F |
| FAM126A  | 0.77891 | 0.34655 | 0.728 | 0.71 | 1 | HC_vs_MS.NoTrt_F |
| ALG11    | 0.77921 | 0.28316 | 0.867 | 0.89 | 1 | HC_vs_MS.NoTrt_F |
| FCRL3    | 0.7795  | 0.74113 | 0.347 | 0.38 | 1 | HC_vs_MS.NoTrt_F |
| HGS      | 0.77969 | 0.35688 | 0.691 | 0.7  | 1 | HC_vs_MS.NoTrt_F |

|         |         |         |       |      |   |                  |
|---------|---------|---------|-------|------|---|------------------|
| USP11   | 0.78024 | 0.36023 | 0.266 | 0.29 | 1 | HC_vs_MS.NoTrt_F |
| ZNF681  | 0.78106 | -0.4178 | 0.708 | 0.69 | 1 | HC_vs_MS.NoTrt_F |
| DIAPH3  | 0.7821  | 0.29161 | 0.364 | 0.38 | 1 | HC_vs_MS.NoTrt_F |
| DMWD    | 0.78253 | 0.41255 | 0.879 | 0.92 | 1 | HC_vs_MS.NoTrt_F |
| DCUN1D3 | 0.78264 | 0.96424 | 0.231 | 0.24 | 1 | HC_vs_MS.NoTrt_F |
| SULT2B1 | 0.78277 | -0.3218 | 0.569 | 0.6  | 1 | HC_vs_MS.NoTrt_F |
| FGFR4   | 0.78302 | 0.25842 | 0.445 | 0.44 | 1 | HC_vs_MS.NoTrt_F |
| LRBA    | 0.78307 | 0.6443  | 0.52  | 0.53 | 1 | HC_vs_MS.NoTrt_F |
| SAXO2   | 0.78337 | 0.52469 | 0.269 | 0.28 | 1 | HC_vs_MS.NoTrt_F |
| MT-ND3  | 0.7837  | 0.80666 | 0.532 | 0.67 | 1 | HC_vs_MS.NoTrt_F |
| SLC23A3 | 0.78388 | 0.3338  | 0.483 | 0.49 | 1 | HC_vs_MS.NoTrt_F |
| MASP2   | 0.7839  | -0.7525 | 0.335 | 0.34 | 1 | HC_vs_MS.NoTrt_F |
| PARBP   | 0.784   | -0.5684 | 0.465 | 0.45 | 1 | HC_vs_MS.NoTrt_F |
| TWSG1   | 0.78457 | 0.56789 | 0.454 | 0.46 | 1 | HC_vs_MS.NoTrt_F |
| SLC9A1  | 0.78509 | 1.17351 | 0.292 | 0.32 | 1 | HC_vs_MS.NoTrt_F |
| MCPH1   | 0.78512 | -0.3843 | 0.743 | 0.75 | 1 | HC_vs_MS.NoTrt_F |
| POLR1C  | 0.78515 | 0.83821 | 0.48  | 0.49 | 1 | HC_vs_MS.NoTrt_F |
| BCL6    | 0.78549 | 0.75463 | 0.191 | 0.19 | 1 | HC_vs_MS.NoTrt_F |
| PPP2R5C | 0.7858  | 0.2995  | 0.936 | 0.96 | 1 | HC_vs_MS.NoTrt_F |
| PTPRG   | 0.78635 | 1.13828 | 0.295 | 0.32 | 1 | HC_vs_MS.NoTrt_F |
| CAPS2   | 0.78664 | 0.94371 | 0.488 | 0.51 | 1 | HC_vs_MS.NoTrt_F |
| DDX19A  | 0.78667 | -0.3286 | 0.974 | 0.98 | 1 | HC_vs_MS.NoTrt_F |
| CTPS1   | 0.7868  | 0.26851 | 0.676 | 0.66 | 1 | HC_vs_MS.NoTrt_F |
| RPAP1   | 0.78685 | -0.6738 | 0.855 | 0.86 | 1 | HC_vs_MS.NoTrt_F |
| CCNYL1  | 0.78701 | -0.3049 | 0.48  | 0.5  | 1 | HC_vs_MS.NoTrt_F |
| PIGL    | 0.78719 | 0.74995 | 0.714 | 0.75 | 1 | HC_vs_MS.NoTrt_F |
| TTF1    | 0.7875  | 0.25224 | 0.512 | 0.51 | 1 | HC_vs_MS.NoTrt_F |
| DRAM2   | 0.78752 | 0.69036 | 0.188 | 0.2  | 1 | HC_vs_MS.NoTrt_F |
| HSF2    | 0.78774 | 0.71893 | 0.142 | 0.16 | 1 | HC_vs_MS.NoTrt_F |
| DNA2    | 0.78791 | -0.3032 | 0.231 | 0.24 | 1 | HC_vs_MS.NoTrt_F |
| INSR    | 0.78823 | 0.90281 | 0.517 | 0.51 | 1 | HC_vs_MS.NoTrt_F |
| GRHL2   | 0.78834 | 0.36647 | 0.28  | 0.31 | 1 | HC_vs_MS.NoTrt_F |
| IL12RB1 | 0.78851 | 0.29042 | 0.89  | 0.88 | 1 | HC_vs_MS.NoTrt_F |
| NARFL   | 0.78854 | 0.74337 | 0.809 | 0.83 | 1 | HC_vs_MS.NoTrt_F |
| CYB5D1  | 0.78864 | -0.822  | 0.205 | 0.21 | 1 | HC_vs_MS.NoTrt_F |
| ZEB2    | 0.78881 | 1.59743 | 0.647 | 0.61 | 1 | HC_vs_MS.NoTrt_F |
| LIMA1   | 0.78883 | 0.63679 | 0.514 | 0.48 | 1 | HC_vs_MS.NoTrt_F |
| IFI27   | 0.78966 | 0.73835 | 0.471 | 0.46 | 1 | HC_vs_MS.NoTrt_F |
| NOSTRIN | 0.79069 | 0.49521 | 0.335 | 0.35 | 1 | HC_vs_MS.NoTrt_F |
| RAB36   | 0.79077 | 1.10618 | 0.39  | 0.38 | 1 | HC_vs_MS.NoTrt_F |

|            |         |         |       |      |   |                  |
|------------|---------|---------|-------|------|---|------------------|
| SPRYD4     | 0.79111 | 0.54904 | 0.89  | 0.93 | 1 | HC_vs_MS.NoTrt_F |
| FAM13A     | 0.79125 | 0.63641 | 0.277 | 0.28 | 1 | HC_vs_MS.NoTrt_F |
| CD55       | 0.79186 | 0.7942  | 0.633 | 0.67 | 1 | HC_vs_MS.NoTrt_F |
| IL1RAP     | 0.79208 | 1.02003 | 0.659 | 0.71 | 1 | HC_vs_MS.NoTrt_F |
| EDC3       | 0.79248 | 0.35372 | 0.448 | 0.46 | 1 | HC_vs_MS.NoTrt_F |
| TRIM66     | 0.79315 | 0.3217  | 0.523 | 0.55 | 1 | HC_vs_MS.NoTrt_F |
| GPAM       | 0.79324 | -0.6385 | 0.113 | 0.12 | 1 | HC_vs_MS.NoTrt_F |
| ULK2       | 0.7935  | -0.9846 | 0.725 | 0.72 | 1 | HC_vs_MS.NoTrt_F |
| NSMCE2     | 0.79352 | 0.44807 | 0.647 | 0.67 | 1 | HC_vs_MS.NoTrt_F |
| OSBPL3     | 0.79363 | 0.5179  | 0.532 | 0.57 | 1 | HC_vs_MS.NoTrt_F |
| RDH10      | 0.79373 | -0.4297 | 0.246 | 0.25 | 1 | HC_vs_MS.NoTrt_F |
| NAPG       | 0.79396 | 0.34645 | 0.659 | 0.67 | 1 | HC_vs_MS.NoTrt_F |
| AC016577.1 | 0.79414 | 0.32102 | 0.436 | 0.5  | 1 | HC_vs_MS.NoTrt_F |
| DAAM2      | 0.79553 | 0.32889 | 0.468 | 0.44 | 1 | HC_vs_MS.NoTrt_F |
| TYMS       | 0.79632 | 0.30804 | 0.251 | 0.26 | 1 | HC_vs_MS.NoTrt_F |
| RRM2       | 0.79673 | 0.47005 | 0.526 | 0.56 | 1 | HC_vs_MS.NoTrt_F |
| CPB1       | 0.79673 | 0.28083 | 0.569 | 0.61 | 1 | HC_vs_MS.NoTrt_F |
| APMAP      | 0.79713 | 0.65234 | 0.249 | 0.26 | 1 | HC_vs_MS.NoTrt_F |
| G6PC2      | 0.79761 | 0.2732  | 0.379 | 0.41 | 1 | HC_vs_MS.NoTrt_F |
| DGKE       | 0.79881 | 0.3856  | 0.74  | 0.75 | 1 | HC_vs_MS.NoTrt_F |
| GEMIN2     | 0.79982 | 0.38566 | 0.691 | 0.71 | 1 | HC_vs_MS.NoTrt_F |
| ZC3H6      | 0.80036 | -0.4717 | 0.85  | 0.79 | 1 | HC_vs_MS.NoTrt_F |
| SPEG       | 0.80068 | 0.70294 | 0.303 | 0.32 | 1 | HC_vs_MS.NoTrt_F |
| C11orf70   | 0.80078 | 0.25264 | 0.266 | 0.29 | 1 | HC_vs_MS.NoTrt_F |
| ZSWIM8     | 0.8008  | 0.83497 | 0.838 | 0.86 | 1 | HC_vs_MS.NoTrt_F |
| PARP11     | 0.80101 | 0.30222 | 0.543 | 0.51 | 1 | HC_vs_MS.NoTrt_F |
| CCDC171    | 0.80214 | 0.96672 | 0.569 | 0.6  | 1 | HC_vs_MS.NoTrt_F |
| POLK       | 0.80221 | 0.37304 | 0.835 | 0.87 | 1 | HC_vs_MS.NoTrt_F |
| POLR2D     | 0.8027  | -0.289  | 0.789 | 0.77 | 1 | HC_vs_MS.NoTrt_F |
| CDK6       | 0.80277 | 1.44989 | 0.257 | 0.27 | 1 | HC_vs_MS.NoTrt_F |
| MFAP3      | 0.80308 | 0.2961  | 0.682 | 0.69 | 1 | HC_vs_MS.NoTrt_F |
| ARHGAP33   | 0.80329 | 0.96279 | 0.197 | 0.22 | 1 | HC_vs_MS.NoTrt_F |
| NLN        | 0.80353 | -0.4906 | 0.754 | 0.71 | 1 | HC_vs_MS.NoTrt_F |
| C22orf46   | 0.80393 | 0.63235 | 0.39  | 0.38 | 1 | HC_vs_MS.NoTrt_F |
| ZNF616     | 0.8041  | 0.51127 | 0.766 | 0.83 | 1 | HC_vs_MS.NoTrt_F |
| FAM63A     | 0.80441 | 0.89762 | 0.581 | 0.59 | 1 | HC_vs_MS.NoTrt_F |
| WBP2NL     | 0.80488 | 0.51911 | 0.419 | 0.43 | 1 | HC_vs_MS.NoTrt_F |
| TPGS1      | 0.8052  | 1.51317 | 0.312 | 0.29 | 1 | HC_vs_MS.NoTrt_F |
| MPDU1      | 0.80626 | -0.3253 | 0.861 | 0.89 | 1 | HC_vs_MS.NoTrt_F |
| PIEZO1     | 0.80651 | 0.2793  | 0.448 | 0.43 | 1 | HC_vs_MS.NoTrt_F |

|            |         |         |       |      |   |                  |
|------------|---------|---------|-------|------|---|------------------|
| NBPF10     | 0.80684 | -0.4204 | 0.303 | 0.3  | 1 | HC_vs_MS.NoTrt_F |
| ASAH2B     | 0.80699 | 0.32938 | 0.422 | 0.41 | 1 | HC_vs_MS.NoTrt_F |
| ZNF2       | 0.80714 | -0.764  | 0.382 | 0.38 | 1 | HC_vs_MS.NoTrt_F |
| C1QTNF2    | 0.80763 | 0.27058 | 0.344 | 0.35 | 1 | HC_vs_MS.NoTrt_F |
| PGM5       | 0.80794 | 0.41393 | 0.104 | 0.12 | 1 | HC_vs_MS.NoTrt_F |
| ANAPC5     | 0.80883 | 0.26661 | 0.962 | 0.96 | 1 | HC_vs_MS.NoTrt_F |
| RP11-327P2 | 0.80926 | 0.38556 | 0.191 | 0.2  | 1 | HC_vs_MS.NoTrt_F |
| H2AFV      | 0.8094  | 0.32688 | 0.691 | 0.73 | 1 | HC_vs_MS.NoTrt_F |
| PXDN       | 0.80943 | 1.1111  | 0.26  | 0.25 | 1 | HC_vs_MS.NoTrt_F |
| NR6A1      | 0.81113 | -0.9328 | 0.477 | 0.47 | 1 | HC_vs_MS.NoTrt_F |
| SRGAP3     | 0.81144 | 0.87047 | 0.879 | 0.88 | 1 | HC_vs_MS.NoTrt_F |
| GPATCH2L   | 0.81161 | 0.52312 | 0.769 | 0.72 | 1 | HC_vs_MS.NoTrt_F |
| HLTF       | 0.81225 | 2.33788 | 0.494 | 0.51 | 1 | HC_vs_MS.NoTrt_F |
| ARHGEF4    | 0.81228 | 0.55031 | 0.627 | 0.64 | 1 | HC_vs_MS.NoTrt_F |
| ZNF720     | 0.81263 | 0.80409 | 0.584 | 0.59 | 1 | HC_vs_MS.NoTrt_F |
| ESYT3      | 0.81321 | 0.46639 | 0.584 | 0.57 | 1 | HC_vs_MS.NoTrt_F |
| MTG2       | 0.81448 | -0.4226 | 0.847 | 0.83 | 1 | HC_vs_MS.NoTrt_F |
| LARS2      | 0.81522 | 0.62289 | 0.546 | 0.54 | 1 | HC_vs_MS.NoTrt_F |
| ATAD5      | 0.81527 | 0.28319 | 0.618 | 0.64 | 1 | HC_vs_MS.NoTrt_F |
| LTBP4      | 0.81554 | 0.53459 | 0.561 | 0.57 | 1 | HC_vs_MS.NoTrt_F |
| BRD9       | 0.81605 | 0.79591 | 0.234 | 0.26 | 1 | HC_vs_MS.NoTrt_F |
| POM121C    | 0.81645 | 0.42395 | 0.497 | 0.5  | 1 | HC_vs_MS.NoTrt_F |
| C21orf58   | 0.81666 | 0.35382 | 0.532 | 0.55 | 1 | HC_vs_MS.NoTrt_F |
| ZMAT5      | 0.81751 | 0.38029 | 0.777 | 0.78 | 1 | HC_vs_MS.NoTrt_F |
| CYP51A1    | 0.81756 | 0.49122 | 0.532 | 0.54 | 1 | HC_vs_MS.NoTrt_F |
| NOX5       | 0.81768 | 0.38423 | 0.592 | 0.62 | 1 | HC_vs_MS.NoTrt_F |
| EFHD1      | 0.81781 | -0.3898 | 0.315 | 0.34 | 1 | HC_vs_MS.NoTrt_F |
| MAP3K10    | 0.81844 | 0.78453 | 0.39  | 0.38 | 1 | HC_vs_MS.NoTrt_F |
| CLTC       | 0.81884 | -0.4379 | 0.483 | 0.44 | 1 | HC_vs_MS.NoTrt_F |
| ZNF530     | 0.81889 | -0.5322 | 0.509 | 0.52 | 1 | HC_vs_MS.NoTrt_F |
| ATP10D     | 0.81917 | 1.29709 | 0.405 | 0.4  | 1 | HC_vs_MS.NoTrt_F |
| NAA50      | 0.81965 | -0.4099 | 0.512 | 0.53 | 1 | HC_vs_MS.NoTrt_F |
| NLRP3      | 0.8206  | 1.01756 | 0.28  | 0.29 | 1 | HC_vs_MS.NoTrt_F |
| EIF2B2     | 0.82082 | -0.4999 | 0.616 | 0.6  | 1 | HC_vs_MS.NoTrt_F |
| NOTCH2     | 0.82124 | 0.81009 | 0.309 | 0.33 | 1 | HC_vs_MS.NoTrt_F |
| NEK6       | 0.82131 | 0.64339 | 0.162 | 0.18 | 1 | HC_vs_MS.NoTrt_F |
| NCR1       | 0.82172 | 1.28906 | 0.266 | 0.28 | 1 | HC_vs_MS.NoTrt_F |
| TRIM34     | 0.82198 | 1.2162  | 0.387 | 0.37 | 1 | HC_vs_MS.NoTrt_F |
| CD109      | 0.82233 | 0.38235 | 0.477 | 0.46 | 1 | HC_vs_MS.NoTrt_F |
| CLCN7      | 0.82233 | 0.27103 | 0.387 | 0.4  | 1 | HC_vs_MS.NoTrt_F |

|          |         |         |       |      |   |                  |
|----------|---------|---------|-------|------|---|------------------|
| LANCL2   | 0.82261 | 0.6775  | 0.185 | 0.2  | 1 | HC_vs_MS.NoTrt_F |
| SLC25A20 | 0.82266 | 0.49075 | 0.171 | 0.18 | 1 | HC_vs_MS.NoTrt_F |
| STIL     | 0.82322 | -0.4499 | 0.668 | 0.63 | 1 | HC_vs_MS.NoTrt_F |
| PRDX4    | 0.82327 | 0.3731  | 0.176 | 0.17 | 1 | HC_vs_MS.NoTrt_F |
| GINS4    | 0.82333 | 0.39203 | 0.916 | 0.93 | 1 | HC_vs_MS.NoTrt_F |
| TNXB     | 0.82366 | 1.70903 | 0.168 | 0.18 | 1 | HC_vs_MS.NoTrt_F |
| TNFRSF21 | 0.82383 | 0.92969 | 0.185 | 0.19 | 1 | HC_vs_MS.NoTrt_F |
| UPF3A    | 0.82403 | -0.291  | 0.775 | 0.79 | 1 | HC_vs_MS.NoTrt_F |
| KCNK10   | 0.82425 | 0.33346 | 0.173 | 0.18 | 1 | HC_vs_MS.NoTrt_F |
| SMIM11A  | 0.82427 | 0.71712 | 0.295 | 0.32 | 1 | HC_vs_MS.NoTrt_F |
| CTDSPL   | 0.82445 | 0.4868  | 0.335 | 0.32 | 1 | HC_vs_MS.NoTrt_F |
| FGF11    | 0.8249  | 0.31838 | 0.306 | 0.31 | 1 | HC_vs_MS.NoTrt_F |
| SIGLEC6  | 0.82493 | 0.66175 | 0.535 | 0.49 | 1 | HC_vs_MS.NoTrt_F |
| PQLC2    | 0.82531 | -0.974  | 0.454 | 0.45 | 1 | HC_vs_MS.NoTrt_F |
| C17orf62 | 0.82556 | 0.38061 | 0.731 | 0.76 | 1 | HC_vs_MS.NoTrt_F |
| GUCD1    | 0.82571 | -0.7311 | 0.512 | 0.48 | 1 | HC_vs_MS.NoTrt_F |
| OLR1     | 0.82589 | 0.31419 | 0.471 | 0.48 | 1 | HC_vs_MS.NoTrt_F |
| ARHGEF9  | 0.82596 | 0.56039 | 0.613 | 0.62 | 1 | HC_vs_MS.NoTrt_F |
| SRBD1    | 0.82637 | -0.6972 | 0.46  | 0.45 | 1 | HC_vs_MS.NoTrt_F |
| KIF3B    | 0.82641 | 0.40887 | 0.5   | 0.49 | 1 | HC_vs_MS.NoTrt_F |
| ITGA2    | 0.82656 | -0.3376 | 0.477 | 0.45 | 1 | HC_vs_MS.NoTrt_F |
| SCAND1   | 0.82659 | 0.4776  | 0.272 | 0.29 | 1 | HC_vs_MS.NoTrt_F |
| ADCY4    | 0.82674 | 0.31167 | 0.15  | 0.17 | 1 | HC_vs_MS.NoTrt_F |
| TEP1     | 0.8269  | 0.77494 | 0.488 | 0.52 | 1 | HC_vs_MS.NoTrt_F |
| CNOT6L   | 0.82704 | 0.49515 | 0.329 | 0.35 | 1 | HC_vs_MS.NoTrt_F |
| METTL14  | 0.82784 | 0.35426 | 0.543 | 0.51 | 1 | HC_vs_MS.NoTrt_F |
| SEMA3D   | 0.82832 | 0.28405 | 0.595 | 0.56 | 1 | HC_vs_MS.NoTrt_F |
| SARDH    | 0.82834 | 0.54162 | 0.486 | 0.49 | 1 | HC_vs_MS.NoTrt_F |
| MATN1    | 0.82892 | 1.28377 | 0.116 | 0.13 | 1 | HC_vs_MS.NoTrt_F |
| MYOM1    | 0.82925 | -0.3515 | 0.402 | 0.39 | 1 | HC_vs_MS.NoTrt_F |
| PHB2     | 0.82927 | 0.36337 | 0.275 | 0.26 | 1 | HC_vs_MS.NoTrt_F |
| TJP1     | 0.82933 | 1.18971 | 0.263 | 0.27 | 1 | HC_vs_MS.NoTrt_F |
| ZFPM1    | 0.82953 | 0.83602 | 0.11  | 0.12 | 1 | HC_vs_MS.NoTrt_F |
| ZNF578   | 0.82971 | 0.29196 | 0.962 | 0.97 | 1 | HC_vs_MS.NoTrt_F |
| IGSF11   | 0.83034 | 0.25033 | 0.095 | 0.11 | 1 | HC_vs_MS.NoTrt_F |
| FOXRED2  | 0.83061 | 0.36039 | 0.59  | 0.6  | 1 | HC_vs_MS.NoTrt_F |
| TMEM2    | 0.83107 | 0.39477 | 0.708 | 0.71 | 1 | HC_vs_MS.NoTrt_F |
| TP53I11  | 0.83155 | 1.29312 | 0.162 | 0.16 | 1 | HC_vs_MS.NoTrt_F |
| PRMT3    | 0.83159 | -0.3622 | 0.358 | 0.36 | 1 | HC_vs_MS.NoTrt_F |
| ZNF669   | 0.83189 | -0.3202 | 0.624 | 0.66 | 1 | HC_vs_MS.NoTrt_F |

|          |         |         |       |      |   |                  |
|----------|---------|---------|-------|------|---|------------------|
| LSG1     | 0.8323  | -0.4328 | 0.503 | 0.48 | 1 | HC_vs_MS.NoTrt_F |
| LTA4H    | 0.83321 | 0.49792 | 0.393 | 0.4  | 1 | HC_vs_MS.NoTrt_F |
| ZNF277   | 0.83377 | -0.4056 | 0.616 | 0.61 | 1 | HC_vs_MS.NoTrt_F |
| COPB2    | 0.83377 | -0.5128 | 0.908 | 0.96 | 1 | HC_vs_MS.NoTrt_F |
| TMEM129  | 0.83385 | 0.43751 | 0.107 | 0.12 | 1 | HC_vs_MS.NoTrt_F |
| MAEL     | 0.83401 | 0.56148 | 0.529 | 0.54 | 1 | HC_vs_MS.NoTrt_F |
| TMEM260  | 0.8346  | -0.5829 | 0.46  | 0.45 | 1 | HC_vs_MS.NoTrt_F |
| NQO2     | 0.83468 | -0.3926 | 0.829 | 0.8  | 1 | HC_vs_MS.NoTrt_F |
| ITGAX    | 0.83534 | 1.60816 | 0.558 | 0.56 | 1 | HC_vs_MS.NoTrt_F |
| LRRC37A  | 0.83569 | 0.73191 | 0.434 | 0.45 | 1 | HC_vs_MS.NoTrt_F |
| IQGAP1   | 0.83608 | 0.29314 | 0.847 | 0.87 | 1 | HC_vs_MS.NoTrt_F |
| CNDP1    | 0.8364  | 0.44424 | 0.671 | 0.69 | 1 | HC_vs_MS.NoTrt_F |
| METTL22  | 0.83727 | 0.61946 | 0.705 | 0.7  | 1 | HC_vs_MS.NoTrt_F |
| IPO9     | 0.83731 | -0.9641 | 0.876 | 0.86 | 1 | HC_vs_MS.NoTrt_F |
| IFIT1    | 0.83734 | 0.63804 | 0.312 | 0.32 | 1 | HC_vs_MS.NoTrt_F |
| IAPP     | 0.83735 | 0.25106 | 0.46  | 0.45 | 1 | HC_vs_MS.NoTrt_F |
| PAX5     | 0.83748 | 0.49739 | 0.159 | 0.16 | 1 | HC_vs_MS.NoTrt_F |
| LYRM1    | 0.83793 | -0.8703 | 0.616 | 0.57 | 1 | HC_vs_MS.NoTrt_F |
| DNAJC14  | 0.83799 | -0.4747 | 0.65  | 0.62 | 1 | HC_vs_MS.NoTrt_F |
| VN1R1    | 0.83806 | 1.24335 | 0.211 | 0.2  | 1 | HC_vs_MS.NoTrt_F |
| FAM20B   | 0.83832 | 0.37617 | 0.63  | 0.62 | 1 | HC_vs_MS.NoTrt_F |
| PHEX     | 0.83837 | -0.2588 | 0.104 | 0.11 | 1 | HC_vs_MS.NoTrt_F |
| TMPRSS7  | 0.83847 | 0.32807 | 0.306 | 0.3  | 1 | HC_vs_MS.NoTrt_F |
| F2RL3    | 0.8388  | 0.52833 | 0.818 | 0.78 | 1 | HC_vs_MS.NoTrt_F |
| FBXL5    | 0.83909 | 0.62208 | 0.376 | 0.42 | 1 | HC_vs_MS.NoTrt_F |
| N4BP2    | 0.84025 | -0.31   | 0.451 | 0.44 | 1 | HC_vs_MS.NoTrt_F |
| RAD51C   | 0.84084 | -0.2706 | 0.968 | 0.97 | 1 | HC_vs_MS.NoTrt_F |
| DENND4A  | 0.84113 | 0.61167 | 0.439 | 0.46 | 1 | HC_vs_MS.NoTrt_F |
| CHD7     | 0.84118 | -0.3335 | 0.636 | 0.6  | 1 | HC_vs_MS.NoTrt_F |
| APBA1    | 0.84133 | -1.1415 | 0.451 | 0.45 | 1 | HC_vs_MS.NoTrt_F |
| CDK19    | 0.84199 | 0.3614  | 0.358 | 0.37 | 1 | HC_vs_MS.NoTrt_F |
| VPS13B   | 0.84318 | 0.32291 | 0.76  | 0.77 | 1 | HC_vs_MS.NoTrt_F |
| C1orf109 | 0.84505 | -0.4178 | 0.922 | 0.86 | 1 | HC_vs_MS.NoTrt_F |
| WFDC11   | 0.84512 | 0.3437  | 0.289 | 0.3  | 1 | HC_vs_MS.NoTrt_F |
| ICAM1    | 0.84582 | 0.70379 | 0.555 | 0.61 | 1 | HC_vs_MS.NoTrt_F |
| PPWD1    | 0.84627 | 0.33636 | 0.301 | 0.33 | 1 | HC_vs_MS.NoTrt_F |
| POLA2    | 0.84695 | -0.3733 | 0.662 | 0.66 | 1 | HC_vs_MS.NoTrt_F |
| FAM210A  | 0.84724 | -0.5388 | 0.39  | 0.4  | 1 | HC_vs_MS.NoTrt_F |
| DENND1A  | 0.84735 | 0.49348 | 0.558 | 0.56 | 1 | HC_vs_MS.NoTrt_F |
| COX20    | 0.84737 | 0.53712 | 0.671 | 0.65 | 1 | HC_vs_MS.NoTrt_F |

|            |         |         |       |      |   |                  |
|------------|---------|---------|-------|------|---|------------------|
| DCAF13     | 0.84745 | 0.36596 | 0.766 | 0.72 | 1 | HC_vs_MS.NoTrt_F |
| ITGA4      | 0.84754 | 0.54484 | 0.272 | 0.3  | 1 | HC_vs_MS.NoTrt_F |
| NAA15      | 0.84822 | 0.27718 | 0.801 | 0.79 | 1 | HC_vs_MS.NoTrt_F |
| TARS2      | 0.84824 | 0.49508 | 0.809 | 0.87 | 1 | HC_vs_MS.NoTrt_F |
| RNF220     | 0.8484  | 0.74795 | 0.699 | 0.73 | 1 | HC_vs_MS.NoTrt_F |
| SPATA6     | 0.84853 | 0.57455 | 0.173 | 0.18 | 1 | HC_vs_MS.NoTrt_F |
| TGIF2      | 0.84882 | -0.5834 | 0.413 | 0.41 | 1 | HC_vs_MS.NoTrt_F |
| PLD3       | 0.84992 | 0.42015 | 0.772 | 0.82 | 1 | HC_vs_MS.NoTrt_F |
| MX1        | 0.85001 | 0.2826  | 0.786 | 0.82 | 1 | HC_vs_MS.NoTrt_F |
| MTHFR      | 0.85045 | 0.32979 | 0.838 | 0.9  | 1 | HC_vs_MS.NoTrt_F |
| RBP1       | 0.85072 | 0.32207 | 0.468 | 0.48 | 1 | HC_vs_MS.NoTrt_F |
| MTF2       | 0.85091 | 0.52384 | 0.402 | 0.38 | 1 | HC_vs_MS.NoTrt_F |
| SIMC1      | 0.8521  | 0.67942 | 0.526 | 0.53 | 1 | HC_vs_MS.NoTrt_F |
| DPH5       | 0.85218 | 0.40538 | 0.361 | 0.36 | 1 | HC_vs_MS.NoTrt_F |
| CHD8       | 0.85223 | 0.71136 | 0.399 | 0.41 | 1 | HC_vs_MS.NoTrt_F |
| SLC35F6    | 0.85274 | 0.39098 | 0.85  | 0.9  | 1 | HC_vs_MS.NoTrt_F |
| SYT16      | 0.85286 | 0.45798 | 0.312 | 0.33 | 1 | HC_vs_MS.NoTrt_F |
| EEA1       | 0.85305 | -0.4912 | 0.277 | 0.28 | 1 | HC_vs_MS.NoTrt_F |
| NOTCH2NL   | 0.85339 | 0.91233 | 0.292 | 0.3  | 1 | HC_vs_MS.NoTrt_F |
| RP11-176H8 | 0.854   | 0.543   | 0.887 | 0.87 | 1 | HC_vs_MS.NoTrt_F |
| HSD17B8    | 0.85402 | 0.50805 | 0.153 | 0.16 | 1 | HC_vs_MS.NoTrt_F |
| ACSM6      | 0.85479 | 0.48861 | 0.147 | 0.15 | 1 | HC_vs_MS.NoTrt_F |
| AFDN       | 0.85488 | 1.47015 | 0.185 | 0.18 | 1 | HC_vs_MS.NoTrt_F |
| MTRF1      | 0.85534 | -0.4205 | 0.598 | 0.56 | 1 | HC_vs_MS.NoTrt_F |
| FBXO11     | 0.85556 | 0.42352 | 0.526 | 0.56 | 1 | HC_vs_MS.NoTrt_F |
| PLEC       | 0.85587 | 0.70239 | 0.439 | 0.48 | 1 | HC_vs_MS.NoTrt_F |
| RGPD2      | 0.8561  | 1.23052 | 0.243 | 0.27 | 1 | HC_vs_MS.NoTrt_F |
| UROS       | 0.85682 | 0.54929 | 0.509 | 0.5  | 1 | HC_vs_MS.NoTrt_F |
| MAST4      | 0.85685 | -0.54   | 0.676 | 0.65 | 1 | HC_vs_MS.NoTrt_F |
| NBEAL1     | 0.85688 | 0.83808 | 0.899 | 0.91 | 1 | HC_vs_MS.NoTrt_F |
| BRD8       | 0.85724 | -0.4775 | 0.786 | 0.77 | 1 | HC_vs_MS.NoTrt_F |
| NDUFAF6    | 0.85777 | -0.608  | 0.662 | 0.66 | 1 | HC_vs_MS.NoTrt_F |
| EXT1       | 0.85832 | 1.17707 | 0.199 | 0.21 | 1 | HC_vs_MS.NoTrt_F |
| CNN3       | 0.85872 | 0.45322 | 0.289 | 0.3  | 1 | HC_vs_MS.NoTrt_F |
| CSRNP1     | 0.85974 | 0.92763 | 0.327 | 0.37 | 1 | HC_vs_MS.NoTrt_F |
| RP11-347C1 | 0.86022 | 0.28374 | 0.809 | 0.83 | 1 | HC_vs_MS.NoTrt_F |
| EREG       | 0.86053 | 0.54277 | 0.853 | 0.88 | 1 | HC_vs_MS.NoTrt_F |
| LIG3       | 0.86056 | 0.54692 | 0.289 | 0.28 | 1 | HC_vs_MS.NoTrt_F |
| CCR8       | 0.86133 | 0.89908 | 0.257 | 0.26 | 1 | HC_vs_MS.NoTrt_F |
| CEP68      | 0.86158 | -0.8498 | 0.598 | 0.55 | 1 | HC_vs_MS.NoTrt_F |



|            |         |         |       |      |   |                  |
|------------|---------|---------|-------|------|---|------------------|
| ADRB2      | 0.8619  | 0.41708 | 0.309 | 0.31 | 1 | HC_vs_MS.NoTrt_F |
| VPS33A     | 0.86216 | -0.4146 | 0.876 | 0.86 | 1 | HC_vs_MS.NoTrt_F |
| ABCA6      | 0.86285 | 0.47239 | 0.685 | 0.67 | 1 | HC_vs_MS.NoTrt_F |
| TCF25      | 0.86315 | 0.3075  | 0.936 | 0.96 | 1 | HC_vs_MS.NoTrt_F |
| FPR1       | 0.86337 | 0.6673  | 0.506 | 0.53 | 1 | HC_vs_MS.NoTrt_F |
| XRCC3      | 0.8638  | -0.3355 | 0.514 | 0.5  | 1 | HC_vs_MS.NoTrt_F |
| EXOSC7     | 0.86543 | 0.30398 | 0.552 | 0.56 | 1 | HC_vs_MS.NoTrt_F |
| ZDHHC4     | 0.86571 | -0.3152 | 0.52  | 0.52 | 1 | HC_vs_MS.NoTrt_F |
| PGAP1      | 0.8658  | 0.9182  | 0.457 | 0.46 | 1 | HC_vs_MS.NoTrt_F |
| TIMM10B    | 0.86601 | 0.43683 | 0.616 | 0.58 | 1 | HC_vs_MS.NoTrt_F |
| DOCK4      | 0.86602 | 0.36553 | 0.318 | 0.32 | 1 | HC_vs_MS.NoTrt_F |
| FOSL2      | 0.86658 | 0.65381 | 0.347 | 0.39 | 1 | HC_vs_MS.NoTrt_F |
| FLOT1      | 0.86666 | 0.644   | 0.223 | 0.22 | 1 | HC_vs_MS.NoTrt_F |
| ZNF836     | 0.86702 | -1.2043 | 0.251 | 0.24 | 1 | HC_vs_MS.NoTrt_F |
| USP32      | 0.8677  | 2.47248 | 0.332 | 0.37 | 1 | HC_vs_MS.NoTrt_F |
| PRKCB      | 0.8683  | 0.41131 | 0.298 | 0.3  | 1 | HC_vs_MS.NoTrt_F |
| ZFYVE28    | 0.86845 | 0.83707 | 0.231 | 0.25 | 1 | HC_vs_MS.NoTrt_F |
| RIT1       | 0.86944 | 0.48892 | 0.477 | 0.5  | 1 | HC_vs_MS.NoTrt_F |
| PAQR3      | 0.86945 | 1.10743 | 0.159 | 0.17 | 1 | HC_vs_MS.NoTrt_F |
| RRP1       | 0.86985 | 0.37295 | 0.711 | 0.71 | 1 | HC_vs_MS.NoTrt_F |
| CCDC138    | 0.8701  | 0.35232 | 0.217 | 0.22 | 1 | HC_vs_MS.NoTrt_F |
| SLC22A5    | 0.87047 | 0.45778 | 0.428 | 0.42 | 1 | HC_vs_MS.NoTrt_F |
| AC138969.4 | 0.87068 | 0.65083 | 0.448 | 0.45 | 1 | HC_vs_MS.NoTrt_F |
| VMP1       | 0.87085 | 0.27502 | 0.858 | 0.88 | 1 | HC_vs_MS.NoTrt_F |
| HERC3      | 0.87142 | 0.75002 | 0.341 | 0.37 | 1 | HC_vs_MS.NoTrt_F |
| CD160      | 0.87199 | 1.28843 | 0.318 | 0.32 | 1 | HC_vs_MS.NoTrt_F |
| POU5F1B    | 0.87247 | 0.2583  | 0.451 | 0.45 | 1 | HC_vs_MS.NoTrt_F |
| MCF2L      | 0.87266 | 0.53572 | 0.37  | 0.35 | 1 | HC_vs_MS.NoTrt_F |
| ZNF555     | 0.87322 | -0.5513 | 0.711 | 0.71 | 1 | HC_vs_MS.NoTrt_F |
| COLGALT1   | 0.8734  | 0.31286 | 0.523 | 0.54 | 1 | HC_vs_MS.NoTrt_F |
| TXN2       | 0.87342 | 0.47501 | 0.382 | 0.38 | 1 | HC_vs_MS.NoTrt_F |
| PMM2       | 0.87393 | -0.3352 | 0.777 | 0.79 | 1 | HC_vs_MS.NoTrt_F |
| PIGH       | 0.87449 | 0.35488 | 0.688 | 0.68 | 1 | HC_vs_MS.NoTrt_F |
| CIART      | 0.87545 | 0.36231 | 0.558 | 0.57 | 1 | HC_vs_MS.NoTrt_F |
| PRRC2A     | 0.87579 | 0.36236 | 0.809 | 0.85 | 1 | HC_vs_MS.NoTrt_F |
| ALDH8A1    | 0.87584 | 0.37848 | 0.59  | 0.61 | 1 | HC_vs_MS.NoTrt_F |
| MRM3       | 0.87601 | 0.85875 | 0.347 | 0.36 | 1 | HC_vs_MS.NoTrt_F |
| RAB40B     | 0.87619 | 0.3528  | 0.601 | 0.62 | 1 | HC_vs_MS.NoTrt_F |
| MAGT1      | 0.87723 | 0.42748 | 0.867 | 0.84 | 1 | HC_vs_MS.NoTrt_F |
| SNX11      | 0.87802 | 0.82823 | 0.642 | 0.67 | 1 | HC_vs_MS.NoTrt_F |

|            |         |         |       |      |   |                  |
|------------|---------|---------|-------|------|---|------------------|
| PRRC2C     | 0.8784  | 0.26535 | 0.847 | 0.86 | 1 | HC_vs_MS.NoTrt_F |
| PHKG1      | 0.87858 | 0.65184 | 0.373 | 0.4  | 1 | HC_vs_MS.NoTrt_F |
| C3orf33    | 0.87956 | -0.4546 | 0.532 | 0.58 | 1 | HC_vs_MS.NoTrt_F |
| PIAS3      | 0.88035 | 0.85972 | 0.249 | 0.25 | 1 | HC_vs_MS.NoTrt_F |
| NFIC       | 0.88051 | 0.41771 | 0.483 | 0.49 | 1 | HC_vs_MS.NoTrt_F |
| AGRN       | 0.88064 | 0.53368 | 0.416 | 0.42 | 1 | HC_vs_MS.NoTrt_F |
| ANKFY1     | 0.88067 | 0.5894  | 0.697 | 0.71 | 1 | HC_vs_MS.NoTrt_F |
| EMG1       | 0.88091 | 0.42796 | 0.225 | 0.23 | 1 | HC_vs_MS.NoTrt_F |
| AGMO       | 0.88115 | 1.36365 | 0.272 | 0.27 | 1 | HC_vs_MS.NoTrt_F |
| ZNF69      | 0.88136 | 0.77832 | 0.454 | 0.44 | 1 | HC_vs_MS.NoTrt_F |
| NEGR1      | 0.88152 | 0.32251 | 0.873 | 0.89 | 1 | HC_vs_MS.NoTrt_F |
| ZCCHC11    | 0.88186 | 0.38522 | 0.945 | 0.97 | 1 | HC_vs_MS.NoTrt_F |
| ACAT1      | 0.88196 | 0.28055 | 0.688 | 0.72 | 1 | HC_vs_MS.NoTrt_F |
| SIGLEC14   | 0.88197 | 0.60008 | 0.289 | 0.3  | 1 | HC_vs_MS.NoTrt_F |
| DGAT2      | 0.88283 | 0.33009 | 0.353 | 0.37 | 1 | HC_vs_MS.NoTrt_F |
| CNOT1      | 0.88342 | 0.77016 | 0.835 | 0.85 | 1 | HC_vs_MS.NoTrt_F |
| CACNA1D    | 0.88349 | 0.50732 | 0.728 | 0.74 | 1 | HC_vs_MS.NoTrt_F |
| BAG2       | 0.88364 | 0.27149 | 0.306 | 0.29 | 1 | HC_vs_MS.NoTrt_F |
| LGR6       | 0.88365 | -0.5132 | 0.168 | 0.18 | 1 | HC_vs_MS.NoTrt_F |
| TMEM219    | 0.88367 | 0.5705  | 0.327 | 0.34 | 1 | HC_vs_MS.NoTrt_F |
| MLXIPL     | 0.88375 | 0.34582 | 0.494 | 0.52 | 1 | HC_vs_MS.NoTrt_F |
| ANKRD13D   | 0.88393 | 0.74514 | 0.734 | 0.74 | 1 | HC_vs_MS.NoTrt_F |
| CNIH3      | 0.88394 | 0.41249 | 0.234 | 0.23 | 1 | HC_vs_MS.NoTrt_F |
| PSMB5      | 0.88451 | 0.50928 | 0.231 | 0.22 | 1 | HC_vs_MS.NoTrt_F |
| WDR83      | 0.88463 | 0.34911 | 0.607 | 0.6  | 1 | HC_vs_MS.NoTrt_F |
| PDE4B      | 0.88519 | 0.77127 | 0.445 | 0.54 | 1 | HC_vs_MS.NoTrt_F |
| CCDC157    | 0.88547 | 0.31129 | 0.694 | 0.7  | 1 | HC_vs_MS.NoTrt_F |
| IFT88      | 0.88594 | 0.73366 | 0.581 | 0.58 | 1 | HC_vs_MS.NoTrt_F |
| HYAL4      | 0.88595 | 0.4286  | 0.549 | 0.56 | 1 | HC_vs_MS.NoTrt_F |
| AC024592.1 | 0.88659 | 0.90962 | 0.376 | 0.39 | 1 | HC_vs_MS.NoTrt_F |
| PEA15      | 0.8866  | 0.62047 | 0.194 | 0.19 | 1 | HC_vs_MS.NoTrt_F |
| SLC25A42   | 0.88666 | 1.03741 | 0.607 | 0.61 | 1 | HC_vs_MS.NoTrt_F |
| COX5A      | 0.8874  | 0.38731 | 0.35  | 0.35 | 1 | HC_vs_MS.NoTrt_F |
| TMEM143    | 0.88743 | 0.83026 | 0.543 | 0.55 | 1 | HC_vs_MS.NoTrt_F |
| DHTKD1     | 0.8899  | 0.37579 | 0.858 | 0.85 | 1 | HC_vs_MS.NoTrt_F |
| GPR155     | 0.88994 | -0.2836 | 0.939 | 0.91 | 1 | HC_vs_MS.NoTrt_F |
| DARS       | 0.88999 | 0.54918 | 0.428 | 0.44 | 1 | HC_vs_MS.NoTrt_F |
| KCNJ14     | 0.89002 | 0.3556  | 0.653 | 0.64 | 1 | HC_vs_MS.NoTrt_F |
| TMEM127    | 0.89046 | 0.45753 | 0.754 | 0.71 | 1 | HC_vs_MS.NoTrt_F |
| NR2C1      | 0.89124 | 0.56343 | 0.746 | 0.76 | 1 | HC_vs_MS.NoTrt_F |

|          |         |         |       |      |   |                  |
|----------|---------|---------|-------|------|---|------------------|
| PRMT1    | 0.89159 | 0.39336 | 0.832 | 0.85 | 1 | HC_vs_MS.NoTrt_F |
| C14orf79 | 0.89197 | 0.35957 | 0.639 | 0.63 | 1 | HC_vs_MS.NoTrt_F |
| POLRMT   | 0.89224 | 1.2547  | 0.176 | 0.18 | 1 | HC_vs_MS.NoTrt_F |
| EMCN     | 0.8928  | 0.55674 | 0.509 | 0.5  | 1 | HC_vs_MS.NoTrt_F |
| TBC1D10B | 0.89303 | 0.28026 | 0.697 | 0.73 | 1 | HC_vs_MS.NoTrt_F |
| BAG5     | 0.89323 | -0.7064 | 0.416 | 0.4  | 1 | HC_vs_MS.NoTrt_F |
| VPS25    | 0.89326 | 0.75677 | 0.338 | 0.34 | 1 | HC_vs_MS.NoTrt_F |
| FBXL20   | 0.89331 | 0.43547 | 0.951 | 0.94 | 1 | HC_vs_MS.NoTrt_F |
| PAXIP1   | 0.89419 | -0.5291 | 0.474 | 0.45 | 1 | HC_vs_MS.NoTrt_F |
| CEP135   | 0.89428 | -0.2754 | 0.824 | 0.8  | 1 | HC_vs_MS.NoTrt_F |
| MAP7D1   | 0.89444 | 0.27903 | 0.59  | 0.58 | 1 | HC_vs_MS.NoTrt_F |
| PRDM2    | 0.89519 | 0.66869 | 0.52  | 0.57 | 1 | HC_vs_MS.NoTrt_F |
| OSBPL9   | 0.89542 | -0.2974 | 0.425 | 0.41 | 1 | HC_vs_MS.NoTrt_F |
| GNAI2    | 0.89542 | 0.59897 | 0.451 | 0.45 | 1 | HC_vs_MS.NoTrt_F |
| INTS3    | 0.89559 | 0.34998 | 0.769 | 0.79 | 1 | HC_vs_MS.NoTrt_F |
| MCOLN2   | 0.89578 | 0.27641 | 0.509 | 0.51 | 1 | HC_vs_MS.NoTrt_F |
| ERV3-1   | 0.89629 | -0.3396 | 0.581 | 0.54 | 1 | HC_vs_MS.NoTrt_F |
| YTHDF3   | 0.89632 | 0.29198 | 0.754 | 0.75 | 1 | HC_vs_MS.NoTrt_F |
| STX3     | 0.89685 | 1.20927 | 0.483 | 0.49 | 1 | HC_vs_MS.NoTrt_F |
| FCRL1    | 0.89863 | 0.90713 | 0.318 | 0.34 | 1 | HC_vs_MS.NoTrt_F |
| SLC26A8  | 0.89911 | 0.35763 | 0.731 | 0.77 | 1 | HC_vs_MS.NoTrt_F |
| SATB1    | 0.8992  | 1.30702 | 0.249 | 0.25 | 1 | HC_vs_MS.NoTrt_F |
| GMPR     | 0.89929 | 0.35492 | 0.39  | 0.4  | 1 | HC_vs_MS.NoTrt_F |
| C1orf216 | 0.90005 | 0.49245 | 0.789 | 0.84 | 1 | HC_vs_MS.NoTrt_F |
| MAN2A2   | 0.90032 | 1.39889 | 0.364 | 0.37 | 1 | HC_vs_MS.NoTrt_F |
| MTA3     | 0.90103 | 0.4891  | 0.697 | 0.7  | 1 | HC_vs_MS.NoTrt_F |
| DPYSL2   | 0.90108 | -0.396  | 0.52  | 0.49 | 1 | HC_vs_MS.NoTrt_F |
| DUSP6    | 0.90129 | 1.19166 | 0.147 | 0.16 | 1 | HC_vs_MS.NoTrt_F |
| UACA     | 0.90141 | 0.73123 | 0.532 | 0.5  | 1 | HC_vs_MS.NoTrt_F |
| KIF9     | 0.9018  | 0.29836 | 0.173 | 0.19 | 1 | HC_vs_MS.NoTrt_F |
| IRGM     | 0.90199 | 0.64854 | 0.413 | 0.43 | 1 | HC_vs_MS.NoTrt_F |
| FAM179A  | 0.90206 | -0.379  | 0.838 | 0.86 | 1 | HC_vs_MS.NoTrt_F |
| POLR1A   | 0.9027  | 0.56311 | 0.772 | 0.76 | 1 | HC_vs_MS.NoTrt_F |
| ZNF326   | 0.9032  | -0.2928 | 0.639 | 0.62 | 1 | HC_vs_MS.NoTrt_F |
| DEF8     | 0.90335 | -0.6076 | 0.512 | 0.53 | 1 | HC_vs_MS.NoTrt_F |
| NDST1    | 0.9038  | 0.66642 | 0.382 | 0.36 | 1 | HC_vs_MS.NoTrt_F |
| CCDC18   | 0.90383 | 0.69329 | 0.249 | 0.26 | 1 | HC_vs_MS.NoTrt_F |
| ERCC1    | 0.9039  | 0.47258 | 0.861 | 0.81 | 1 | HC_vs_MS.NoTrt_F |
| PIK3CB   | 0.90433 | -0.616  | 0.517 | 0.49 | 1 | HC_vs_MS.NoTrt_F |
| RTCA     | 0.90456 | 0.41661 | 0.645 | 0.64 | 1 | HC_vs_MS.NoTrt_F |

|          |         |         |       |      |   |                  |
|----------|---------|---------|-------|------|---|------------------|
| SAMD4A   | 0.9046  | 0.52475 | 0.63  | 0.65 | 1 | HC_vs_MS.NoTrt_F |
| TTC38    | 0.90464 | 0.80032 | 0.538 | 0.52 | 1 | HC_vs_MS.NoTrt_F |
| ADM2     | 0.90467 | -0.4346 | 0.358 | 0.35 | 1 | HC_vs_MS.NoTrt_F |
| FAM60A   | 0.90504 | 0.27344 | 0.535 | 0.56 | 1 | HC_vs_MS.NoTrt_F |
| SSR4     | 0.90556 | 0.55465 | 0.448 | 0.45 | 1 | HC_vs_MS.NoTrt_F |
| MTMR1    | 0.90671 | 0.90516 | 0.254 | 0.27 | 1 | HC_vs_MS.NoTrt_F |
| PTPN23   | 0.90749 | 0.45422 | 0.205 | 0.2  | 1 | HC_vs_MS.NoTrt_F |
| CXCL14   | 0.90757 | 1.64757 | 0.194 | 0.2  | 1 | HC_vs_MS.NoTrt_F |
| MECP2    | 0.90814 | 0.32012 | 0.962 | 0.97 | 1 | HC_vs_MS.NoTrt_F |
| EXOSC2   | 0.90874 | 0.32557 | 0.792 | 0.78 | 1 | HC_vs_MS.NoTrt_F |
| LINS1    | 0.90912 | 0.30766 | 0.627 | 0.69 | 1 | HC_vs_MS.NoTrt_F |
| CDS2     | 0.90955 | 0.36162 | 0.827 | 0.86 | 1 | HC_vs_MS.NoTrt_F |
| LRRC8B   | 0.90959 | 0.74294 | 0.488 | 0.48 | 1 | HC_vs_MS.NoTrt_F |
| SFN      | 0.90964 | 0.46742 | 0.353 | 0.35 | 1 | HC_vs_MS.NoTrt_F |
| TMEM159  | 0.9098  | 0.35615 | 0.61  | 0.59 | 1 | HC_vs_MS.NoTrt_F |
| SHPK     | 0.91024 | -0.373  | 0.512 | 0.49 | 1 | HC_vs_MS.NoTrt_F |
| PURA     | 0.91086 | -0.5563 | 0.136 | 0.14 | 1 | HC_vs_MS.NoTrt_F |
| SUN3     | 0.91171 | 0.33724 | 0.413 | 0.4  | 1 | HC_vs_MS.NoTrt_F |
| EPHX2    | 0.91177 | 0.91176 | 0.353 | 0.38 | 1 | HC_vs_MS.NoTrt_F |
| IPO8     | 0.91195 | 0.271   | 0.575 | 0.62 | 1 | HC_vs_MS.NoTrt_F |
| ARHGEF39 | 0.91207 | 0.30326 | 0.737 | 0.76 | 1 | HC_vs_MS.NoTrt_F |
| MMP25    | 0.91263 | 0.90739 | 0.197 | 0.21 | 1 | HC_vs_MS.NoTrt_F |
| MEIS2    | 0.9136  | 0.4025  | 0.225 | 0.23 | 1 | HC_vs_MS.NoTrt_F |
| SLC13A5  | 0.91381 | 0.33982 | 0.789 | 0.82 | 1 | HC_vs_MS.NoTrt_F |
| NDUFA5   | 0.91408 | 0.32812 | 0.659 | 0.69 | 1 | HC_vs_MS.NoTrt_F |
| STRADA   | 0.9143  | 0.3354  | 0.656 | 0.62 | 1 | HC_vs_MS.NoTrt_F |
| MACF1    | 0.9145  | 0.35898 | 0.91  | 0.92 | 1 | HC_vs_MS.NoTrt_F |
| MAPK10   | 0.9146  | 0.52763 | 0.332 | 0.33 | 1 | HC_vs_MS.NoTrt_F |
| USP9X    | 0.91483 | 0.27251 | 0.645 | 0.65 | 1 | HC_vs_MS.NoTrt_F |
| KIF18A   | 0.91494 | 0.35272 | 0.405 | 0.42 | 1 | HC_vs_MS.NoTrt_F |
| ZKSCAN5  | 0.91543 | -0.5571 | 0.691 | 0.67 | 1 | HC_vs_MS.NoTrt_F |
| NOS3     | 0.91548 | -0.4746 | 0.445 | 0.43 | 1 | HC_vs_MS.NoTrt_F |
| ETF1     | 0.91597 | 0.30757 | 0.448 | 0.48 | 1 | HC_vs_MS.NoTrt_F |
| SLC38A2  | 0.9163  | 0.59551 | 0.425 | 0.44 | 1 | HC_vs_MS.NoTrt_F |
| ZNF141   | 0.91769 | -0.2651 | 0.971 | 0.97 | 1 | HC_vs_MS.NoTrt_F |
| UGT1A1   | 0.91802 | 0.32764 | 0.569 | 0.61 | 1 | HC_vs_MS.NoTrt_F |
| LATS1    | 0.91815 | 0.37189 | 0.717 | 0.72 | 1 | HC_vs_MS.NoTrt_F |
| ZBTB16   | 0.91848 | 1.78046 | 0.442 | 0.44 | 1 | HC_vs_MS.NoTrt_F |
| USP37    | 0.91916 | -0.3809 | 0.535 | 0.51 | 1 | HC_vs_MS.NoTrt_F |
| ICE2     | 0.91987 | -0.7083 | 0.882 | 0.85 | 1 | HC_vs_MS.NoTrt_F |

|             |         |         |       |      |   |                  |
|-------------|---------|---------|-------|------|---|------------------|
| SKIV2L2     | 0.92072 | 0.36992 | 0.887 | 0.9  | 1 | HC_vs_MS.NoTrt_F |
| CMPK1       | 0.92092 | 0.35295 | 0.361 | 0.37 | 1 | HC_vs_MS.NoTrt_F |
| BMP8B       | 0.92168 | 0.2658  | 0.514 | 0.5  | 1 | HC_vs_MS.NoTrt_F |
| ZNF699      | 0.92192 | 0.68382 | 0.353 | 0.36 | 1 | HC_vs_MS.NoTrt_F |
| APPBP2      | 0.92203 | -0.6992 | 0.873 | 0.85 | 1 | HC_vs_MS.NoTrt_F |
| AKR1A1      | 0.92232 | 0.39656 | 0.757 | 0.86 | 1 | HC_vs_MS.NoTrt_F |
| ALG13       | 0.92256 | 0.29711 | 0.41  | 0.43 | 1 | HC_vs_MS.NoTrt_F |
| PDE5A       | 0.92383 | -0.3328 | 0.153 | 0.15 | 1 | HC_vs_MS.NoTrt_F |
| INPP5F      | 0.92444 | 0.79454 | 0.35  | 0.38 | 1 | HC_vs_MS.NoTrt_F |
| FUZ         | 0.92568 | 0.58944 | 0.286 | 0.3  | 1 | HC_vs_MS.NoTrt_F |
| ENAH        | 0.92591 | 0.50145 | 0.723 | 0.76 | 1 | HC_vs_MS.NoTrt_F |
| CCHCR1      | 0.92631 | 0.57004 | 0.376 | 0.37 | 1 | HC_vs_MS.NoTrt_F |
| ERBB2       | 0.92632 | 0.26823 | 0.847 | 0.86 | 1 | HC_vs_MS.NoTrt_F |
| DAGLB       | 0.92657 | -0.2852 | 0.861 | 0.88 | 1 | HC_vs_MS.NoTrt_F |
| TMTC3       | 0.9269  | 0.82857 | 0.269 | 0.28 | 1 | HC_vs_MS.NoTrt_F |
| SLC38A9     | 0.92699 | 1.07859 | 0.434 | 0.45 | 1 | HC_vs_MS.NoTrt_F |
| TXK         | 0.9272  | 0.7495  | 0.621 | 0.64 | 1 | HC_vs_MS.NoTrt_F |
| NIPBL       | 0.92774 | 0.5624  | 0.624 | 0.63 | 1 | HC_vs_MS.NoTrt_F |
| GUF1        | 0.92784 | 0.8968  | 0.448 | 0.45 | 1 | HC_vs_MS.NoTrt_F |
| WEE1        | 0.92857 | -0.4456 | 0.769 | 0.76 | 1 | HC_vs_MS.NoTrt_F |
| CTB-50L17.1 | 0.92857 | -0.2566 | 0.65  | 0.64 | 1 | HC_vs_MS.NoTrt_F |
| ZFP30       | 0.92896 | -0.4991 | 0.844 | 0.91 | 1 | HC_vs_MS.NoTrt_F |
| VSTM4       | 0.92987 | 0.95633 | 0.777 | 0.76 | 1 | HC_vs_MS.NoTrt_F |
| TNFRSF18    | 0.93024 | 1.3483  | 0.289 | 0.33 | 1 | HC_vs_MS.NoTrt_F |
| BAZ1A       | 0.9307  | 0.37251 | 0.483 | 0.49 | 1 | HC_vs_MS.NoTrt_F |
| SKP1        | 0.93123 | 0.34967 | 0.853 | 0.86 | 1 | HC_vs_MS.NoTrt_F |
| TCEAL1      | 0.93142 | 0.86919 | 0.121 | 0.13 | 1 | HC_vs_MS.NoTrt_F |
| KLF7        | 0.93193 | 0.44521 | 0.266 | 0.25 | 1 | HC_vs_MS.NoTrt_F |
| RPH3AL      | 0.93205 | 0.66122 | 0.393 | 0.38 | 1 | HC_vs_MS.NoTrt_F |
| BPTF        | 0.9325  | 0.34712 | 0.832 | 0.83 | 1 | HC_vs_MS.NoTrt_F |
| ZNF658      | 0.93266 | 1.22326 | 0.22  | 0.22 | 1 | HC_vs_MS.NoTrt_F |
| NEIL1       | 0.93292 | 0.53024 | 0.824 | 0.81 | 1 | HC_vs_MS.NoTrt_F |
| TEX10       | 0.93309 | 0.2915  | 0.526 | 0.52 | 1 | HC_vs_MS.NoTrt_F |
| PYCR1       | 0.93407 | 0.89421 | 0.465 | 0.46 | 1 | HC_vs_MS.NoTrt_F |
| DBNDD1      | 0.93457 | 0.99572 | 0.182 | 0.19 | 1 | HC_vs_MS.NoTrt_F |
| BCL2L11     | 0.93462 | 0.34929 | 0.549 | 0.55 | 1 | HC_vs_MS.NoTrt_F |
| FCER1G      | 0.93475 | 1.17028 | 0.671 | 0.72 | 1 | HC_vs_MS.NoTrt_F |
| TINAGL1     | 0.93548 | 0.32323 | 0.54  | 0.55 | 1 | HC_vs_MS.NoTrt_F |
| SPDYE2B     | 0.93587 | 0.857   | 0.37  | 0.4  | 1 | HC_vs_MS.NoTrt_F |
| MTRF1       | 0.93644 | 0.41109 | 0.208 | 0.21 | 1 | HC_vs_MS.NoTrt_F |

|          |         |         |       |      |   |                  |
|----------|---------|---------|-------|------|---|------------------|
| CTSB     | 0.93682 | -0.2718 | 0.974 | 0.96 | 1 | HC_vs_MS.NoTrt_F |
| EML5     | 0.93709 | 0.46651 | 0.243 | 0.24 | 1 | HC_vs_MS.NoTrt_F |
| SYNE4    | 0.93749 | 0.32609 | 0.517 | 0.53 | 1 | HC_vs_MS.NoTrt_F |
| PLAGL1   | 0.93768 | 0.4247  | 0.13  | 0.14 | 1 | HC_vs_MS.NoTrt_F |
| UPB1     | 0.93789 | 0.32208 | 0.624 | 0.66 | 1 | HC_vs_MS.NoTrt_F |
| FLVCR1   | 0.93806 | 0.78166 | 0.702 | 0.7  | 1 | HC_vs_MS.NoTrt_F |
| ULBP3    | 0.9383  | 0.27599 | 0.647 | 0.6  | 1 | HC_vs_MS.NoTrt_F |
| HSD3B7   | 0.93902 | 0.33911 | 0.506 | 0.51 | 1 | HC_vs_MS.NoTrt_F |
| CALD1    | 0.93903 | 1.90197 | 0.327 | 0.32 | 1 | HC_vs_MS.NoTrt_F |
| SCNM1    | 0.94033 | -0.3169 | 0.824 | 0.78 | 1 | HC_vs_MS.NoTrt_F |
| ZSCAN18  | 0.94034 | 0.44274 | 0.731 | 0.69 | 1 | HC_vs_MS.NoTrt_F |
| PPAT     | 0.94056 | 0.91526 | 0.344 | 0.34 | 1 | HC_vs_MS.NoTrt_F |
| TADA2B   | 0.94071 | 1.91342 | 0.361 | 0.36 | 1 | HC_vs_MS.NoTrt_F |
| EPB41L2  | 0.94102 | -0.7496 | 0.214 | 0.22 | 1 | HC_vs_MS.NoTrt_F |
| FSD1L    | 0.94145 | 0.41917 | 0.28  | 0.27 | 1 | HC_vs_MS.NoTrt_F |
| ZNF785   | 0.94276 | -0.2738 | 0.916 | 0.93 | 1 | HC_vs_MS.NoTrt_F |
| LTBP3    | 0.9438  | 0.70163 | 0.757 | 0.76 | 1 | HC_vs_MS.NoTrt_F |
| NDUFA10  | 0.94394 | 0.43048 | 0.39  | 0.39 | 1 | HC_vs_MS.NoTrt_F |
| EMC3     | 0.94396 | -0.2601 | 0.928 | 0.91 | 1 | HC_vs_MS.NoTrt_F |
| PECR     | 0.94485 | 0.46491 | 0.751 | 0.72 | 1 | HC_vs_MS.NoTrt_F |
| TBL3     | 0.94517 | 0.55996 | 0.344 | 0.34 | 1 | HC_vs_MS.NoTrt_F |
| MMRN2    | 0.9452  | 0.29218 | 0.249 | 0.26 | 1 | HC_vs_MS.NoTrt_F |
| ESYT2    | 0.9454  | 0.56722 | 0.668 | 0.71 | 1 | HC_vs_MS.NoTrt_F |
| GOLGA8A  | 0.9456  | 0.74203 | 0.509 | 0.59 | 1 | HC_vs_MS.NoTrt_F |
| BTBD8    | 0.94626 | 0.3061  | 0.361 | 0.36 | 1 | HC_vs_MS.NoTrt_F |
| EXOC5    | 0.94704 | 0.68885 | 0.454 | 0.47 | 1 | HC_vs_MS.NoTrt_F |
| TMEM255B | 0.94711 | 0.87811 | 0.243 | 0.25 | 1 | HC_vs_MS.NoTrt_F |
| CARS2    | 0.94775 | 0.29956 | 0.78  | 0.77 | 1 | HC_vs_MS.NoTrt_F |
| CYB561D1 | 0.94837 | 0.55418 | 0.5   | 0.48 | 1 | HC_vs_MS.NoTrt_F |
| PCBP3    | 0.9488  | 0.3249  | 0.506 | 0.53 | 1 | HC_vs_MS.NoTrt_F |
| EXD3     | 0.94926 | 0.43275 | 0.569 | 0.56 | 1 | HC_vs_MS.NoTrt_F |
| RFX5     | 0.95044 | 0.40136 | 0.393 | 0.38 | 1 | HC_vs_MS.NoTrt_F |
| OTULIN   | 0.95059 | 0.42763 | 0.497 | 0.47 | 1 | HC_vs_MS.NoTrt_F |
| MFSD11   | 0.95059 | 0.54732 | 0.497 | 0.5  | 1 | HC_vs_MS.NoTrt_F |
| MCMDC2   | 0.95071 | 0.83692 | 0.488 | 0.5  | 1 | HC_vs_MS.NoTrt_F |
| NEURL1   | 0.9509  | -0.4772 | 0.303 | 0.29 | 1 | HC_vs_MS.NoTrt_F |
| FER      | 0.95149 | -0.2501 | 0.575 | 0.59 | 1 | HC_vs_MS.NoTrt_F |
| PLEKHG5  | 0.9516  | 0.51007 | 0.182 | 0.19 | 1 | HC_vs_MS.NoTrt_F |
| APBB2    | 0.95168 | 0.87622 | 0.376 | 0.39 | 1 | HC_vs_MS.NoTrt_F |
| CGRRF1   | 0.95179 | 1.22639 | 0.332 | 0.33 | 1 | HC_vs_MS.NoTrt_F |

|            |         |         |       |      |   |                  |
|------------|---------|---------|-------|------|---|------------------|
| ZNF841     | 0.95234 | 1.05151 | 0.538 | 0.54 | 1 | HC_vs_MS.NoTrt_F |
| GBA2       | 0.95269 | 0.29334 | 0.656 | 0.61 | 1 | HC_vs_MS.NoTrt_F |
| TMEM108    | 0.9529  | 0.70323 | 0.367 | 0.37 | 1 | HC_vs_MS.NoTrt_F |
| SLC38A10   | 0.95293 | 0.37948 | 0.448 | 0.43 | 1 | HC_vs_MS.NoTrt_F |
| PRRG1      | 0.953   | 0.40072 | 0.251 | 0.25 | 1 | HC_vs_MS.NoTrt_F |
| ZNF799     | 0.95366 | 0.57886 | 0.471 | 0.48 | 1 | HC_vs_MS.NoTrt_F |
| XPR1       | 0.95388 | 0.26369 | 0.445 | 0.45 | 1 | HC_vs_MS.NoTrt_F |
| PHKB       | 0.95478 | -0.5855 | 0.777 | 0.77 | 1 | HC_vs_MS.NoTrt_F |
| ATP1A3     | 0.95479 | -0.4624 | 0.405 | 0.4  | 1 | HC_vs_MS.NoTrt_F |
| ZNF562     | 0.95483 | -0.7213 | 0.977 | 0.97 | 1 | HC_vs_MS.NoTrt_F |
| RP11-849H4 | 0.95497 | 0.47895 | 0.587 | 0.58 | 1 | HC_vs_MS.NoTrt_F |
| NOM1       | 0.95536 | -0.5249 | 0.714 | 0.69 | 1 | HC_vs_MS.NoTrt_F |
| PTRF       | 0.95539 | 1.15998 | 0.474 | 0.46 | 1 | HC_vs_MS.NoTrt_F |
| ACSS2      | 0.95569 | 1.12944 | 0.572 | 0.55 | 1 | HC_vs_MS.NoTrt_F |
| SH3GLB1    | 0.95592 | 0.36579 | 0.555 | 0.56 | 1 | HC_vs_MS.NoTrt_F |
| MRPS23     | 0.95684 | -0.5601 | 0.858 | 0.84 | 1 | HC_vs_MS.NoTrt_F |
| NUDT3      | 0.95741 | 0.35561 | 0.584 | 0.6  | 1 | HC_vs_MS.NoTrt_F |
| NFKB1      | 0.95767 | 1.51975 | 0.15  | 0.16 | 1 | HC_vs_MS.NoTrt_F |
| ATP2A2     | 0.95822 | 0.69441 | 0.749 | 0.72 | 1 | HC_vs_MS.NoTrt_F |
| RNF19A     | 0.95856 | 0.57728 | 0.506 | 0.56 | 1 | HC_vs_MS.NoTrt_F |
| RASGRF2    | 0.95889 | 1.32876 | 0.228 | 0.23 | 1 | HC_vs_MS.NoTrt_F |
| SPINK9     | 0.9589  | 0.66753 | 0.688 | 0.76 | 1 | HC_vs_MS.NoTrt_F |
| ZNF140     | 0.95896 | -0.6102 | 0.223 | 0.23 | 1 | HC_vs_MS.NoTrt_F |
| NOP2       | 0.95897 | -0.4124 | 0.474 | 0.45 | 1 | HC_vs_MS.NoTrt_F |
| SHQ1       | 0.95929 | -0.5941 | 0.754 | 0.76 | 1 | HC_vs_MS.NoTrt_F |
| KLLN       | 0.96123 | 0.45362 | 0.497 | 0.52 | 1 | HC_vs_MS.NoTrt_F |
| NSL1       | 0.96128 | 0.34118 | 0.821 | 0.78 | 1 | HC_vs_MS.NoTrt_F |
| NOTCH3     | 0.96137 | 0.30932 | 0.616 | 0.63 | 1 | HC_vs_MS.NoTrt_F |
| KCNN2      | 0.96139 | 0.36688 | 0.309 | 0.32 | 1 | HC_vs_MS.NoTrt_F |
| DDB1       | 0.962   | -0.4132 | 0.922 | 0.88 | 1 | HC_vs_MS.NoTrt_F |
| KANK3      | 0.9628  | 0.51756 | 0.277 | 0.28 | 1 | HC_vs_MS.NoTrt_F |
| RALGPS1    | 0.96289 | 0.87281 | 0.477 | 0.45 | 1 | HC_vs_MS.NoTrt_F |
| C5         | 0.96321 | -0.9637 | 0.465 | 0.48 | 1 | HC_vs_MS.NoTrt_F |
| 4-Sep      | 0.96347 | 0.8641  | 0.529 | 0.5  | 1 | HC_vs_MS.NoTrt_F |
| NAE1       | 0.96526 | -0.5167 | 0.737 | 0.73 | 1 | HC_vs_MS.NoTrt_F |
| ST8SIA1    | 0.96547 | 1.00792 | 0.647 | 0.64 | 1 | HC_vs_MS.NoTrt_F |
| THOC2      | 0.96547 | 0.52884 | 0.601 | 0.61 | 1 | HC_vs_MS.NoTrt_F |
| ARFRP1     | 0.96573 | 0.41155 | 0.509 | 0.53 | 1 | HC_vs_MS.NoTrt_F |
| IFFO1      | 0.96629 | 0.76782 | 0.474 | 0.46 | 1 | HC_vs_MS.NoTrt_F |
| CTD-2521M: | 0.96675 | 0.3167  | 0.37  | 0.39 | 1 | HC_vs_MS.NoTrt_F |

|           |         |         |       |      |   |                  |
|-----------|---------|---------|-------|------|---|------------------|
| NME9      | 0.96712 | 0.77475 | 0.275 | 0.29 | 1 | HC_vs_MS.NoTrt_F |
| RNF152    | 0.96733 | 0.50397 | 0.509 | 0.51 | 1 | HC_vs_MS.NoTrt_F |
| SOS2      | 0.96738 | 0.64529 | 0.136 | 0.14 | 1 | HC_vs_MS.NoTrt_F |
| CLDN12    | 0.9675  | 0.30554 | 0.471 | 0.5  | 1 | HC_vs_MS.NoTrt_F |
| SLC12A4   | 0.96764 | 0.89912 | 0.286 | 0.28 | 1 | HC_vs_MS.NoTrt_F |
| WDR13     | 0.96799 | 0.47552 | 0.884 | 0.87 | 1 | HC_vs_MS.NoTrt_F |
| NATD1     | 0.9687  | 0.25917 | 0.561 | 0.54 | 1 | HC_vs_MS.NoTrt_F |
| TMEM64    | 0.96872 | 0.50672 | 0.428 | 0.46 | 1 | HC_vs_MS.NoTrt_F |
| HIVEP1    | 0.96923 | 0.61402 | 0.665 | 0.74 | 1 | HC_vs_MS.NoTrt_F |
| SLC10A3   | 0.96944 | 0.38161 | 0.159 | 0.16 | 1 | HC_vs_MS.NoTrt_F |
| ZNF577    | 0.96945 | 0.6613  | 0.428 | 0.42 | 1 | HC_vs_MS.NoTrt_F |
| ZNF532    | 0.96946 | -0.3061 | 0.942 | 0.97 | 1 | HC_vs_MS.NoTrt_F |
| NDUFA9    | 0.97042 | -0.3492 | 0.905 | 0.9  | 1 | HC_vs_MS.NoTrt_F |
| CDK17     | 0.97111 | 0.83819 | 0.289 | 0.31 | 1 | HC_vs_MS.NoTrt_F |
| CHD3      | 0.97123 | 0.44072 | 0.373 | 0.38 | 1 | HC_vs_MS.NoTrt_F |
| GIPC1     | 0.97133 | 0.47175 | 0.552 | 0.59 | 1 | HC_vs_MS.NoTrt_F |
| KNL1      | 0.97166 | 0.92303 | 0.451 | 0.43 | 1 | HC_vs_MS.NoTrt_F |
| FOXJ3     | 0.97179 | 0.56358 | 0.627 | 0.61 | 1 | HC_vs_MS.NoTrt_F |
| SYNGR2    | 0.97196 | 0.37664 | 0.601 | 0.62 | 1 | HC_vs_MS.NoTrt_F |
| ALG8      | 0.97203 | -0.5613 | 0.543 | 0.51 | 1 | HC_vs_MS.NoTrt_F |
| EXOC8     | 0.97271 | 0.36898 | 0.46  | 0.46 | 1 | HC_vs_MS.NoTrt_F |
| DNAJA1    | 0.97349 | 0.34928 | 0.494 | 0.5  | 1 | HC_vs_MS.NoTrt_F |
| CTC-487M2 | 0.97355 | 0.32049 | 0.91  | 0.95 | 1 | HC_vs_MS.NoTrt_F |
| BCAR3     | 0.974   | 0.5842  | 0.676 | 0.66 | 1 | HC_vs_MS.NoTrt_F |
| TRAPPC3L  | 0.97427 | 0.25846 | 0.616 | 0.64 | 1 | HC_vs_MS.NoTrt_F |
| HPS1      | 0.97474 | 0.32894 | 0.668 | 0.67 | 1 | HC_vs_MS.NoTrt_F |
| RABGGTB   | 0.97508 | 0.32277 | 0.373 | 0.38 | 1 | HC_vs_MS.NoTrt_F |
| DDIAS     | 0.97519 | 0.33439 | 0.46  | 0.44 | 1 | HC_vs_MS.NoTrt_F |
| BTBD2     | 0.97576 | 0.91485 | 0.431 | 0.44 | 1 | HC_vs_MS.NoTrt_F |
| MTHFD2L   | 0.9761  | 0.62642 | 0.535 | 0.54 | 1 | HC_vs_MS.NoTrt_F |
| LYST      | 0.97622 | 0.66868 | 0.422 | 0.43 | 1 | HC_vs_MS.NoTrt_F |
| COQ7      | 0.97758 | 0.41102 | 0.434 | 0.43 | 1 | HC_vs_MS.NoTrt_F |
| SPCS1     | 0.97763 | 0.25041 | 0.899 | 0.93 | 1 | HC_vs_MS.NoTrt_F |
| SLC39A3   | 0.97766 | 0.35366 | 0.65  | 0.68 | 1 | HC_vs_MS.NoTrt_F |
| FAM120C   | 0.97784 | 0.4203  | 0.298 | 0.32 | 1 | HC_vs_MS.NoTrt_F |
| WDR26     | 0.9781  | 0.98386 | 0.717 | 0.72 | 1 | HC_vs_MS.NoTrt_F |
| PTPRCAP   | 0.9791  | 0.26818 | 0.668 | 0.82 | 1 | HC_vs_MS.NoTrt_F |
| ZNF212    | 0.97936 | -1.1865 | 0.506 | 0.48 | 1 | HC_vs_MS.NoTrt_F |
| ZNF483    | 0.97953 | -0.324  | 0.882 | 0.87 | 1 | HC_vs_MS.NoTrt_F |
| IL23R     | 0.97953 | -1.1608 | 0.422 | 0.4  | 1 | HC_vs_MS.NoTrt_F |



|           |         |         |       |      |   |                  |
|-----------|---------|---------|-------|------|---|------------------|
| GTF2A2    | 0.98121 | -0.7015 | 0.633 | 0.62 | 1 | HC_vs_MS.NoTrt_F |
| PGD       | 0.98145 | 0.32409 | 0.194 | 0.19 | 1 | HC_vs_MS.NoTrt_F |
| CEP95     | 0.98233 | 0.33782 | 0.419 | 0.43 | 1 | HC_vs_MS.NoTrt_F |
| FAM159A   | 0.98245 | 0.38555 | 0.63  | 0.63 | 1 | HC_vs_MS.NoTrt_F |
| POFUT1    | 0.98311 | 0.49701 | 0.616 | 0.6  | 1 | HC_vs_MS.NoTrt_F |
| NFAT5     | 0.98339 | 0.25976 | 0.893 | 0.89 | 1 | HC_vs_MS.NoTrt_F |
| ITGA10    | 0.9838  | -0.2812 | 0.543 | 0.55 | 1 | HC_vs_MS.NoTrt_F |
| ENOSF1    | 0.98411 | 1.09111 | 0.879 | 0.9  | 1 | HC_vs_MS.NoTrt_F |
| BPNT1     | 0.98469 | -0.3082 | 0.775 | 0.7  | 1 | HC_vs_MS.NoTrt_F |
| MEIOC     | 0.98481 | -0.3349 | 0.699 | 0.69 | 1 | HC_vs_MS.NoTrt_F |
| TMEM191C  | 0.98524 | 0.30522 | 0.772 | 0.83 | 1 | HC_vs_MS.NoTrt_F |
| SGPP2     | 0.9856  | 0.71099 | 0.399 | 0.41 | 1 | HC_vs_MS.NoTrt_F |
| ITM2A     | 0.98623 | 0.5776  | 0.347 | 0.37 | 1 | HC_vs_MS.NoTrt_F |
| RABL2A    | 0.98653 | -0.2568 | 0.601 | 0.56 | 1 | HC_vs_MS.NoTrt_F |
| SYTL3     | 0.98687 | 0.33331 | 0.384 | 0.4  | 1 | HC_vs_MS.NoTrt_F |
| PRR27     | 0.98698 | 0.26038 | 0.517 | 0.53 | 1 | HC_vs_MS.NoTrt_F |
| MAP7D3    | 0.98722 | 0.48133 | 0.662 | 0.65 | 1 | HC_vs_MS.NoTrt_F |
| NPAS3     | 0.98759 | 0.32646 | 0.448 | 0.44 | 1 | HC_vs_MS.NoTrt_F |
| SLC27A1   | 0.98796 | 0.58081 | 0.87  | 0.87 | 1 | HC_vs_MS.NoTrt_F |
| WASH1     | 0.98864 | 0.75029 | 0.266 | 0.28 | 1 | HC_vs_MS.NoTrt_F |
| TBC1D31   | 0.98948 | -0.4718 | 0.685 | 0.68 | 1 | HC_vs_MS.NoTrt_F |
| SLC50A1   | 0.98986 | 0.32068 | 0.803 | 0.8  | 1 | HC_vs_MS.NoTrt_F |
| HPGD      | 0.98997 | 0.74699 | 0.275 | 0.29 | 1 | HC_vs_MS.NoTrt_F |
| SYK       | 0.99017 | 0.47526 | 0.431 | 0.45 | 1 | HC_vs_MS.NoTrt_F |
| CAMTA2    | 0.99041 | 0.26437 | 0.549 | 0.55 | 1 | HC_vs_MS.NoTrt_F |
| ZNF334    | 0.99055 | 0.76415 | 0.142 | 0.15 | 1 | HC_vs_MS.NoTrt_F |
| KLF11     | 0.99063 | 0.70645 | 0.107 | 0.11 | 1 | HC_vs_MS.NoTrt_F |
| MOB3B     | 0.99097 | 0.34668 | 0.575 | 0.57 | 1 | HC_vs_MS.NoTrt_F |
| RNF41     | 0.99106 | -0.5978 | 0.801 | 0.82 | 1 | HC_vs_MS.NoTrt_F |
| ITIH5     | 0.99106 | 0.37022 | 0.818 | 0.85 | 1 | HC_vs_MS.NoTrt_F |
| ZNF91     | 0.99203 | 0.7552  | 0.806 | 0.82 | 1 | HC_vs_MS.NoTrt_F |
| POLR2A    | 0.99205 | 0.45379 | 0.844 | 0.85 | 1 | HC_vs_MS.NoTrt_F |
| DDI2      | 0.99226 | 0.38669 | 0.812 | 0.81 | 1 | HC_vs_MS.NoTrt_F |
| SLC5A5    | 0.99232 | -0.3016 | 0.517 | 0.5  | 1 | HC_vs_MS.NoTrt_F |
| COX15     | 0.99234 | -0.5208 | 0.639 | 0.62 | 1 | HC_vs_MS.NoTrt_F |
| JAKMIP2   | 0.99307 | 0.73338 | 0.512 | 0.51 | 1 | HC_vs_MS.NoTrt_F |
| C20orf196 | 0.99336 | 0.55655 | 0.373 | 0.38 | 1 | HC_vs_MS.NoTrt_F |
| YEATS2    | 0.9939  | 0.30609 | 0.728 | 0.7  | 1 | HC_vs_MS.NoTrt_F |
| SPPL2A    | 0.99399 | 0.28183 | 0.951 | 0.95 | 1 | HC_vs_MS.NoTrt_F |
| TARBP1    | 0.99403 | 0.58204 | 0.477 | 0.49 | 1 | HC_vs_MS.NoTrt_F |

|          |          |         |       |      |          |                  |
|----------|----------|---------|-------|------|----------|------------------|
| DHX29    | 0.99463  | 0.49575 | 0.249 | 0.25 | 1        | HC_vs_MS.NoTrt_F |
| AP4E1    | 0.99505  | -0.4915 | 0.486 | 0.46 | 1        | HC_vs_MS.NoTrt_F |
| BTBD9    | 0.99528  | 1.22913 | 0.621 | 0.63 | 1        | HC_vs_MS.NoTrt_F |
| DCUN1D5  | 0.99582  | -0.3448 | 0.483 | 0.45 | 1        | HC_vs_MS.NoTrt_F |
| KPNA4    | 0.99583  | 0.52989 | 0.659 | 0.69 | 1        | HC_vs_MS.NoTrt_F |
| WSB1     | 0.99639  | 0.25443 | 0.899 | 0.92 | 1        | HC_vs_MS.NoTrt_F |
| SCAF4    | 0.99667  | 0.3048  | 0.28  | 0.29 | 1        | HC_vs_MS.NoTrt_F |
| PRICKLE3 | 0.99721  | 1.03219 | 0.555 | 0.53 | 1        | HC_vs_MS.NoTrt_F |
| HYLS1    | 0.99737  | 0.70296 | 0.454 | 0.45 | 1        | HC_vs_MS.NoTrt_F |
| CAGE1    | 0.99751  | 0.2503  | 0.373 | 0.38 | 1        | HC_vs_MS.NoTrt_F |
| SH3RF2   | 0.99754  | 1.26477 | 0.191 | 0.19 | 1        | HC_vs_MS.NoTrt_F |
| ZNF233   | 0.99768  | 0.30856 | 0.491 | 0.5  | 1        | HC_vs_MS.NoTrt_F |
| COQ8A    | 0.9978   | 0.30176 | 0.705 | 0.7  | 1        | HC_vs_MS.NoTrt_F |
| OAS3     | 0.99804  | 0.48545 | 0.665 | 0.69 | 1        | HC_vs_MS.NoTrt_F |
| PPP1R12B | 0.99855  | 1.21116 | 0.803 | 0.8  | 1        | HC_vs_MS.NoTrt_F |
| RFX1     | 0.9989   | 0.92149 | 0.379 | 0.38 | 1        | HC_vs_MS.NoTrt_F |
| FBN1     | 0.99898  | 0.45433 | 0.514 | 0.53 | 1        | HC_vs_MS.NoTrt_F |
| DOCK5    | 0.99901  | 0.47928 | 0.587 | 0.63 | 1        | HC_vs_MS.NoTrt_F |
| BRD4     | 1        | 0.69096 | 0.353 | 0.37 | 1        | HC_vs_MS.NoTrt_F |
| FADS1    | 1        | 0.57275 | 0.647 | 0.69 | 1        | HC_vs_MS.NoTrt_F |
| RBBP9    | 1        | 0.46167 | 0.486 | 0.5  | 1        | HC_vs_MS.NoTrt_F |
| FAM135A  | 1        | -0.9954 | 0.471 | 0.46 | 1        | HC_vs_MS.NoTrt_F |
| HLA-B    | 1.14E-36 | -0.8265 | 0.906 | 0.98 | 1.82E-32 | HC_vs_MS.NoTrt_B |
| RPS4Y1   | 2.18E-25 | -2.5784 | 0.072 | 0.35 | 3.48E-21 | HC_vs_MS.NoTrt_B |
| FGF23    | 5.33E-24 | 2.1637  | 0.828 | 0.54 | 8.52E-20 | HC_vs_MS.NoTrt_B |
| TMSB10   | 3.97E-19 | -0.6517 | 0.913 | 1    | 6.34E-15 | HC_vs_MS.NoTrt_B |
| RPL13A   | 1.02E-18 | -0.5325 | 0.904 | 1    | 1.63E-14 | HC_vs_MS.NoTrt_B |
| ARRDC3   | 1.17E-18 | -0.5935 | 0.464 | 0.84 | 1.87E-14 | HC_vs_MS.NoTrt_B |
| IL32     | 7.12E-16 | -0.5172 | 0.851 | 0.97 | 1.14E-11 | HC_vs_MS.NoTrt_B |
| TMSB4X   | 1.23E-15 | -0.4266 | 0.993 | 1    | 1.97E-11 | HC_vs_MS.NoTrt_B |
| S100A4   | 1.40E-15 | -0.7662 | 0.491 | 0.8  | 2.24E-11 | HC_vs_MS.NoTrt_B |
| MIPOL1   | 2.42E-15 | 0.57393 | 0.997 | 0.98 | 3.87E-11 | HC_vs_MS.NoTrt_B |
| CD99     | 5.40E-15 | -0.6729 | 0.377 | 0.71 | 8.63E-11 | HC_vs_MS.NoTrt_B |
| TMEM45A  | 7.51E-15 | 0.53795 | 0.996 | 1    | 1.20E-10 | HC_vs_MS.NoTrt_B |
| RPS3     | 2.09E-14 | -0.4008 | 0.92  | 1    | 3.34E-10 | HC_vs_MS.NoTrt_B |
| FRK      | 3.01E-14 | 0.47036 | 0.991 | 1    | 4.81E-10 | HC_vs_MS.NoTrt_B |
| B2M      | 3.14E-14 | -0.257  | 1     | 1    | 5.01E-10 | HC_vs_MS.NoTrt_B |
| CRIP1    | 5.53E-14 | -0.8146 | 0.296 | 0.57 | 8.83E-10 | HC_vs_MS.NoTrt_B |
| CD52     | 9.12E-14 | -0.5357 | 0.742 | 0.94 | 1.46E-09 | HC_vs_MS.NoTrt_B |
| ANXA2    | 1.18E-13 | -0.7037 | 0.607 | 0.82 | 1.89E-09 | HC_vs_MS.NoTrt_B |

|           |          |         |       |      |          |                  |
|-----------|----------|---------|-------|------|----------|------------------|
| RPL27     | 2.25E-13 | -0.4687 | 0.606 | 0.89 | 3.59E-09 | HC_vs_MS.NoTrt_B |
| MT-ND4L   | 5.17E-13 | 0.9432  | 0.984 | 0.99 | 8.26E-09 | HC_vs_MS.NoTrt_B |
| MORC4     | 5.21E-13 | 0.49767 | 0.991 | 1    | 8.33E-09 | HC_vs_MS.NoTrt_B |
| LSP1      | 5.92E-13 | -0.5472 | 0.601 | 0.87 | 9.45E-09 | HC_vs_MS.NoTrt_B |
| RPS27A    | 7.25E-13 | -0.5093 | 0.788 | 0.97 | 1.16E-08 | HC_vs_MS.NoTrt_B |
| RPL36     | 1.18E-12 | -0.5285 | 0.593 | 0.87 | 1.89E-08 | HC_vs_MS.NoTrt_B |
| RPL7A     | 1.63E-12 | -0.4636 | 0.764 | 0.97 | 2.61E-08 | HC_vs_MS.NoTrt_B |
| UQCR11    | 2.34E-12 | -0.5315 | 0.504 | 0.77 | 3.74E-08 | HC_vs_MS.NoTrt_B |
| RPL27A    | 2.47E-12 | -0.4915 | 0.928 | 0.98 | 3.95E-08 | HC_vs_MS.NoTrt_B |
| RPL28     | 4.43E-12 | -0.4177 | 0.925 | 1    | 7.07E-08 | HC_vs_MS.NoTrt_B |
| ARHGDI B  | 7.27E-12 | -0.352  | 0.9   | 1    | 1.16E-07 | HC_vs_MS.NoTrt_B |
| HLA-A     | 7.55E-12 | -0.5364 | 0.83  | 0.94 | 1.21E-07 | HC_vs_MS.NoTrt_B |
| RAN       | 1.12E-11 | -0.5964 | 0.39  | 0.68 | 1.79E-07 | HC_vs_MS.NoTrt_B |
| RPL19     | 1.15E-11 | -0.4556 | 0.797 | 0.94 | 1.84E-07 | HC_vs_MS.NoTrt_B |
| TMEM50A   | 1.48E-11 | -0.7002 | 0.233 | 0.48 | 2.36E-07 | HC_vs_MS.NoTrt_B |
| C12orf45  | 1.86E-11 | 0.38453 | 0.997 | 1    | 2.97E-07 | HC_vs_MS.NoTrt_B |
| RPL24     | 2.57E-11 | -0.5451 | 0.728 | 0.91 | 4.11E-07 | HC_vs_MS.NoTrt_B |
| INTU      | 3.77E-11 | 0.50744 | 0.987 | 0.97 | 6.02E-07 | HC_vs_MS.NoTrt_B |
| RPAP2     | 5.94E-11 | 0.54234 | 0.997 | 1    | 9.48E-07 | HC_vs_MS.NoTrt_B |
| MTRNR2L12 | 6.15E-11 | 0.38999 | 1     | 1    | 9.82E-07 | HC_vs_MS.NoTrt_B |
| GAPDH     | 6.44E-11 | -0.5155 | 0.703 | 0.89 | 1.03E-06 | HC_vs_MS.NoTrt_B |
| RPLP1     | 6.81E-11 | -0.4273 | 0.948 | 1    | 1.09E-06 | HC_vs_MS.NoTrt_B |
| RPS21     | 8.26E-11 | -0.5301 | 0.439 | 0.76 | 1.32E-06 | HC_vs_MS.NoTrt_B |
| COMMD1    | 9.12E-11 | -0.5678 | 0.536 | 0.8  | 1.46E-06 | HC_vs_MS.NoTrt_B |
| SPATA4    | 1.07E-10 | 0.56432 | 0.587 | 0.36 | 1.71E-06 | HC_vs_MS.NoTrt_B |
| PSME1     | 1.16E-10 | -0.5041 | 0.522 | 0.76 | 1.85E-06 | HC_vs_MS.NoTrt_B |
| S100A6    | 1.36E-10 | -0.4649 | 0.496 | 0.76 | 2.18E-06 | HC_vs_MS.NoTrt_B |
| JAKMIP1   | 1.75E-10 | -1.0861 | 0.175 | 0.38 | 2.79E-06 | HC_vs_MS.NoTrt_B |
| FXYD5     | 2.06E-10 | -0.4349 | 0.713 | 0.89 | 3.29E-06 | HC_vs_MS.NoTrt_B |
| LRRC57    | 2.33E-10 | 0.2855  | 0.97  | 0.95 | 3.73E-06 | HC_vs_MS.NoTrt_B |
| RPS8      | 2.75E-10 | -0.35   | 0.949 | 1    | 4.40E-06 | HC_vs_MS.NoTrt_B |
| FTH1      | 2.99E-10 | -0.3891 | 0.759 | 0.93 | 4.78E-06 | HC_vs_MS.NoTrt_B |
| NACA      | 3.24E-10 | -0.4678 | 0.89  | 0.98 | 5.18E-06 | HC_vs_MS.NoTrt_B |
| ANK3      | 3.40E-10 | 0.80186 | 0.904 | 0.82 | 5.43E-06 | HC_vs_MS.NoTrt_B |
| RPS20     | 5.33E-10 | -0.5579 | 0.791 | 0.92 | 8.52E-06 | HC_vs_MS.NoTrt_B |
| NDUFA6    | 5.93E-10 | -0.5316 | 0.188 | 0.41 | 9.47E-06 | HC_vs_MS.NoTrt_B |
| H3F3A     | 7.92E-10 | -0.3484 | 0.61  | 0.86 | 1.27E-05 | HC_vs_MS.NoTrt_B |
| MYL6      | 9.89E-10 | -0.3875 | 0.594 | 0.85 | 1.58E-05 | HC_vs_MS.NoTrt_B |
| MIF       | 1.21E-09 | -0.4506 | 0.361 | 0.64 | 1.94E-05 | HC_vs_MS.NoTrt_B |
| EPN1      | 1.31E-09 | 0.41406 | 0.949 | 0.93 | 2.09E-05 | HC_vs_MS.NoTrt_B |

|          |          |         |       |      |          |                  |
|----------|----------|---------|-------|------|----------|------------------|
| RPSA     | 1.39E-09 | -0.4874 | 0.652 | 0.83 | 2.23E-05 | HC_vs_MS.NoTrt_B |
| ORC6     | 1.40E-09 | 0.57032 | 0.977 | 0.97 | 2.23E-05 | HC_vs_MS.NoTrt_B |
| RPS18    | 1.68E-09 | -0.3579 | 0.968 | 0.99 | 2.68E-05 | HC_vs_MS.NoTrt_B |
| CKLF     | 1.77E-09 | -0.5965 | 0.148 | 0.34 | 2.83E-05 | HC_vs_MS.NoTrt_B |
| CCR6     | 1.81E-09 | -1.2676 | 0.307 | 0.52 | 2.90E-05 | HC_vs_MS.NoTrt_B |
| PRDM1    | 1.97E-09 | -0.3164 | 0.414 | 0.71 | 3.15E-05 | HC_vs_MS.NoTrt_B |
| EHD1     | 2.01E-09 | -0.6957 | 0.264 | 0.49 | 3.20E-05 | HC_vs_MS.NoTrt_B |
| RPS16    | 2.04E-09 | -0.4112 | 0.775 | 0.92 | 3.27E-05 | HC_vs_MS.NoTrt_B |
| S100A10  | 2.25E-09 | -0.4668 | 0.491 | 0.76 | 3.59E-05 | HC_vs_MS.NoTrt_B |
| COX7C    | 2.37E-09 | -0.5624 | 0.31  | 0.56 | 3.78E-05 | HC_vs_MS.NoTrt_B |
| NEDD4    | 2.46E-09 | 0.63483 | 0.964 | 0.97 | 3.92E-05 | HC_vs_MS.NoTrt_B |
| PKM      | 2.52E-09 | -0.3758 | 0.487 | 0.76 | 4.02E-05 | HC_vs_MS.NoTrt_B |
| FTL      | 2.68E-09 | -0.3195 | 0.917 | 1    | 4.29E-05 | HC_vs_MS.NoTrt_B |
| RPS23    | 2.72E-09 | -0.3447 | 0.838 | 0.97 | 4.35E-05 | HC_vs_MS.NoTrt_B |
| SULT1B1  | 2.78E-09 | 0.70301 | 0.959 | 0.96 | 4.44E-05 | HC_vs_MS.NoTrt_B |
| HNRNPA1  | 3.02E-09 | -0.3682 | 0.748 | 0.93 | 4.82E-05 | HC_vs_MS.NoTrt_B |
| EMP3     | 3.30E-09 | -0.4538 | 0.507 | 0.75 | 5.26E-05 | HC_vs_MS.NoTrt_B |
| COL8A1   | 3.54E-09 | 0.55947 | 0.826 | 0.74 | 5.66E-05 | HC_vs_MS.NoTrt_B |
| ALOX5AP  | 4.17E-09 | -0.6587 | 0.213 | 0.43 | 6.66E-05 | HC_vs_MS.NoTrt_B |
| GLIPR2   | 4.43E-09 | -0.8907 | 0.196 | 0.38 | 7.08E-05 | HC_vs_MS.NoTrt_B |
| RPL37    | 4.67E-09 | -0.3383 | 0.942 | 0.99 | 7.46E-05 | HC_vs_MS.NoTrt_B |
| CSTB     | 4.95E-09 | -0.3421 | 0.406 | 0.65 | 7.91E-05 | HC_vs_MS.NoTrt_B |
| XRCC6    | 5.85E-09 | -0.4805 | 0.546 | 0.76 | 9.35E-05 | HC_vs_MS.NoTrt_B |
| CFAP54   | 6.91E-09 | 0.59023 | 0.939 | 0.96 | 1.10E-04 | HC_vs_MS.NoTrt_B |
| RPL32    | 9.31E-09 | -0.3824 | 0.919 | 0.99 | 1.49E-04 | HC_vs_MS.NoTrt_B |
| RPL12    | 1.03E-08 | -0.3786 | 0.832 | 0.95 | 1.65E-04 | HC_vs_MS.NoTrt_B |
| METTL21A | 1.06E-08 | 0.57804 | 0.942 | 0.97 | 1.69E-04 | HC_vs_MS.NoTrt_B |
| ACTG1    | 1.16E-08 | -0.4013 | 0.878 | 0.96 | 1.85E-04 | HC_vs_MS.NoTrt_B |
| NDUFA1   | 1.23E-08 | -0.4469 | 0.209 | 0.43 | 1.97E-04 | HC_vs_MS.NoTrt_B |
| RPL35A   | 1.32E-08 | -0.398  | 0.886 | 0.97 | 2.11E-04 | HC_vs_MS.NoTrt_B |
| LIME1    | 1.44E-08 | -0.4768 | 0.365 | 0.62 | 2.30E-04 | HC_vs_MS.NoTrt_B |
| H3F3B    | 1.66E-08 | -0.2565 | 0.781 | 0.96 | 2.64E-04 | HC_vs_MS.NoTrt_B |
| RPS13    | 1.68E-08 | -0.3543 | 0.796 | 0.96 | 2.68E-04 | HC_vs_MS.NoTrt_B |
| ENO1     | 1.69E-08 | -0.5089 | 0.377 | 0.63 | 2.71E-04 | HC_vs_MS.NoTrt_B |
| NDUFA4   | 1.82E-08 | -0.4976 | 0.558 | 0.75 | 2.91E-04 | HC_vs_MS.NoTrt_B |
| ATP5E    | 2.00E-08 | -0.3266 | 0.372 | 0.61 | 3.20E-04 | HC_vs_MS.NoTrt_B |
| CDC37    | 2.34E-08 | -0.476  | 0.323 | 0.56 | 3.74E-04 | HC_vs_MS.NoTrt_B |
| TPI1     | 2.37E-08 | -0.5483 | 0.372 | 0.6  | 3.78E-04 | HC_vs_MS.NoTrt_B |
| RPL18    | 2.51E-08 | -0.3465 | 0.694 | 0.92 | 4.02E-04 | HC_vs_MS.NoTrt_B |
| CCDC167  | 2.71E-08 | -0.9461 | 0.099 | 0.25 | 4.33E-04 | HC_vs_MS.NoTrt_B |

|            |          |         |       |      |          |                  |
|------------|----------|---------|-------|------|----------|------------------|
| DBI        | 2.87E-08 | -0.806  | 0.149 | 0.33 | 4.59E-04 | HC_vs_MS.NoTrt_B |
| RPL30      | 2.90E-08 | -0.361  | 0.852 | 0.97 | 4.63E-04 | HC_vs_MS.NoTrt_B |
| RPL13      | 2.93E-08 | -0.2993 | 0.929 | 0.99 | 4.67E-04 | HC_vs_MS.NoTrt_B |
| SLC25A6    | 2.95E-08 | -0.4534 | 0.554 | 0.76 | 4.71E-04 | HC_vs_MS.NoTrt_B |
| TXNIP      | 3.29E-08 | -0.3614 | 0.813 | 0.94 | 5.26E-04 | HC_vs_MS.NoTrt_B |
| COX7A2L    | 3.30E-08 | -0.4434 | 0.258 | 0.48 | 5.27E-04 | HC_vs_MS.NoTrt_B |
| COPE       | 3.77E-08 | -0.405  | 0.303 | 0.55 | 6.03E-04 | HC_vs_MS.NoTrt_B |
| TOMM7      | 4.03E-08 | -0.4244 | 0.554 | 0.75 | 6.44E-04 | HC_vs_MS.NoTrt_B |
| IRGQ       | 4.16E-08 | 0.73794 | 0.98  | 0.99 | 6.64E-04 | HC_vs_MS.NoTrt_B |
| PRDX1      | 4.39E-08 | -0.4907 | 0.465 | 0.67 | 7.01E-04 | HC_vs_MS.NoTrt_B |
| VAMP5      | 4.68E-08 | -0.7381 | 0.113 | 0.28 | 7.47E-04 | HC_vs_MS.NoTrt_B |
| RPL29      | 5.21E-08 | -0.3332 | 0.836 | 0.98 | 8.32E-04 | HC_vs_MS.NoTrt_B |
| RAB12      | 5.75E-08 | 2.66349 | 0.362 | 0.19 | 9.18E-04 | HC_vs_MS.NoTrt_B |
| MYL12A     | 5.77E-08 | -0.2756 | 0.894 | 1    | 9.22E-04 | HC_vs_MS.NoTrt_B |
| BIN1       | 5.84E-08 | -0.5106 | 0.262 | 0.49 | 9.33E-04 | HC_vs_MS.NoTrt_B |
| TMEM173    | 6.22E-08 | -0.9196 | 0.201 | 0.38 | 9.94E-04 | HC_vs_MS.NoTrt_B |
| ANKRD30BL  | 6.33E-08 | 0.45776 | 0.584 | 0.41 | 0.001012 | HC_vs_MS.NoTrt_B |
| NDUFA13    | 6.92E-08 | -0.5236 | 0.409 | 0.62 | 0.001105 | HC_vs_MS.NoTrt_B |
| RPL23A     | 7.10E-08 | -0.3456 | 0.875 | 0.98 | 0.001134 | HC_vs_MS.NoTrt_B |
| RPS11      | 8.46E-08 | -0.3518 | 0.649 | 0.87 | 0.001351 | HC_vs_MS.NoTrt_B |
| ASTN2      | 8.86E-08 | 0.52638 | 0.943 | 0.95 | 0.001416 | HC_vs_MS.NoTrt_B |
| RPL41      | 9.36E-08 | -0.3609 | 0.957 | 1    | 0.001496 | HC_vs_MS.NoTrt_B |
| RASL10B    | 1.01E-07 | 0.34068 | 0.972 | 0.97 | 0.001615 | HC_vs_MS.NoTrt_B |
| ANXA5      | 1.08E-07 | -0.6797 | 0.23  | 0.42 | 0.001729 | HC_vs_MS.NoTrt_B |
| CEACAM21   | 1.13E-07 | -0.3918 | 0.37  | 0.57 | 0.001805 | HC_vs_MS.NoTrt_B |
| RPS19      | 1.23E-07 | -0.3454 | 0.933 | 1    | 0.001969 | HC_vs_MS.NoTrt_B |
| RPS25      | 1.36E-07 | -0.3122 | 0.771 | 0.95 | 0.002176 | HC_vs_MS.NoTrt_B |
| PSMB7      | 1.38E-07 | -0.5979 | 0.174 | 0.35 | 0.002211 | HC_vs_MS.NoTrt_B |
| ADAM32     | 1.45E-07 | 0.70725 | 0.854 | 0.82 | 0.002318 | HC_vs_MS.NoTrt_B |
| GMFG       | 1.51E-07 | -0.3106 | 0.772 | 0.91 | 0.002414 | HC_vs_MS.NoTrt_B |
| NSRP1      | 1.61E-07 | 0.309   | 0.999 | 1    | 0.002567 | HC_vs_MS.NoTrt_B |
| TAGLN2     | 1.61E-07 | -0.4302 | 0.496 | 0.71 | 0.002571 | HC_vs_MS.NoTrt_B |
| RPS15A     | 1.72E-07 | -0.3336 | 0.991 | 1    | 0.002739 | HC_vs_MS.NoTrt_B |
| C9orf16    | 1.99E-07 | -0.3637 | 0.206 | 0.4  | 0.003185 | HC_vs_MS.NoTrt_B |
| RP11-49K24 | 2.00E-07 | -0.4531 | 0.117 | 0.28 | 0.003189 | HC_vs_MS.NoTrt_B |
| RPL22      | 2.04E-07 | -0.3    | 0.584 | 0.8  | 0.003253 | HC_vs_MS.NoTrt_B |
| VIM        | 2.16E-07 | -0.3319 | 0.788 | 0.92 | 0.003447 | HC_vs_MS.NoTrt_B |
| TXN        | 2.17E-07 | -0.3877 | 0.19  | 0.38 | 0.003461 | HC_vs_MS.NoTrt_B |
| FGF13      | 2.24E-07 | 0.46722 | 0.943 | 0.95 | 0.00358  | HC_vs_MS.NoTrt_B |
| MSN        | 2.24E-07 | -0.3983 | 0.558 | 0.74 | 0.003582 | HC_vs_MS.NoTrt_B |

|            |          |         |       |      |          |                  |
|------------|----------|---------|-------|------|----------|------------------|
| EBP        | 2.33E-07 | -0.8695 | 0.129 | 0.28 | 0.00372  | HC_vs_MS.NoTrt_B |
| ASB3       | 2.40E-07 | 0.44495 | 0.936 | 0.94 | 0.003838 | HC_vs_MS.NoTrt_B |
| THYN1      | 2.68E-07 | -0.6641 | 0.13  | 0.29 | 0.004273 | HC_vs_MS.NoTrt_B |
| COX8A      | 2.75E-07 | -0.3553 | 0.18  | 0.37 | 0.004393 | HC_vs_MS.NoTrt_B |
| VCP        | 2.78E-07 | -0.4796 | 0.249 | 0.45 | 0.004439 | HC_vs_MS.NoTrt_B |
| RPL18A     | 2.79E-07 | -0.2931 | 0.914 | 1    | 0.004457 | HC_vs_MS.NoTrt_B |
| ITM2B      | 2.80E-07 | -0.3014 | 0.567 | 0.83 | 0.004476 | HC_vs_MS.NoTrt_B |
| RPL17      | 2.86E-07 | -0.2942 | 0.903 | 1    | 0.004562 | HC_vs_MS.NoTrt_B |
| RPS12      | 2.95E-07 | -0.3346 | 0.887 | 0.98 | 0.004713 | HC_vs_MS.NoTrt_B |
| SOD2       | 2.99E-07 | 0.30232 | 1     | 1    | 0.004773 | HC_vs_MS.NoTrt_B |
| PRRG3      | 3.07E-07 | 1.6224  | 0.597 | 0.42 | 0.004904 | HC_vs_MS.NoTrt_B |
| UBE2D2     | 3.15E-07 | -0.3075 | 0.377 | 0.6  | 0.005032 | HC_vs_MS.NoTrt_B |
| UPK3BL     | 3.29E-07 | -0.5215 | 0.532 | 0.67 | 0.005252 | HC_vs_MS.NoTrt_B |
| RPL11      | 3.30E-07 | -0.257  | 0.957 | 1    | 0.005268 | HC_vs_MS.NoTrt_B |
| TSPO       | 3.35E-07 | -0.3553 | 0.271 | 0.5  | 0.005357 | HC_vs_MS.NoTrt_B |
| LDHB       | 3.66E-07 | -0.3454 | 0.726 | 0.91 | 0.00585  | HC_vs_MS.NoTrt_B |
| HLA-C      | 4.10E-07 | -0.6103 | 0.886 | 0.92 | 0.006549 | HC_vs_MS.NoTrt_B |
| RPL35      | 4.14E-07 | -0.3868 | 0.759 | 0.9  | 0.006612 | HC_vs_MS.NoTrt_B |
| RPL10A     | 4.16E-07 | -0.3521 | 0.851 | 0.97 | 0.006647 | HC_vs_MS.NoTrt_B |
| ATP6V1F    | 4.16E-07 | -0.5866 | 0.155 | 0.32 | 0.006649 | HC_vs_MS.NoTrt_B |
| SRP9       | 4.81E-07 | -0.2694 | 0.345 | 0.56 | 0.007682 | HC_vs_MS.NoTrt_B |
| PIK3IP1    | 5.01E-07 | -0.294  | 0.664 | 0.84 | 0.008    | HC_vs_MS.NoTrt_B |
| MYL12B     | 5.03E-07 | -0.3895 | 0.459 | 0.69 | 0.008034 | HC_vs_MS.NoTrt_B |
| SLC25A3    | 5.06E-07 | -0.479  | 0.929 | 0.96 | 0.008089 | HC_vs_MS.NoTrt_B |
| ANXA6      | 5.23E-07 | -0.3758 | 0.426 | 0.64 | 0.008357 | HC_vs_MS.NoTrt_B |
| ANXA11     | 5.38E-07 | -0.3935 | 0.797 | 0.88 | 0.008598 | HC_vs_MS.NoTrt_B |
| C2CD3      | 5.39E-07 | 0.2629  | 0.991 | 0.97 | 0.008615 | HC_vs_MS.NoTrt_B |
| SERF2      | 6.80E-07 | -0.2658 | 0.799 | 0.95 | 0.010864 | HC_vs_MS.NoTrt_B |
| RP11-286N2 | 6.86E-07 | 0.41814 | 0.958 | 0.93 | 0.01095  | HC_vs_MS.NoTrt_B |
| ARHGAP30   | 6.95E-07 | -0.4634 | 0.355 | 0.56 | 0.011102 | HC_vs_MS.NoTrt_B |
| CSGALNACT  | 6.95E-07 | -0.4909 | 0.514 | 0.69 | 0.011105 | HC_vs_MS.NoTrt_B |
| RPS28      | 7.01E-07 | -0.3932 | 0.826 | 0.94 | 0.011192 | HC_vs_MS.NoTrt_B |
| CHCHD2     | 7.15E-07 | -0.4594 | 0.346 | 0.55 | 0.011418 | HC_vs_MS.NoTrt_B |
| SOD1       | 7.81E-07 | -0.3128 | 0.646 | 0.8  | 0.012483 | HC_vs_MS.NoTrt_B |
| SH3BGRL3   | 7.86E-07 | -0.3022 | 0.787 | 0.91 | 0.012548 | HC_vs_MS.NoTrt_B |
| CCDC107    | 7.86E-07 | -0.7354 | 0.107 | 0.25 | 0.012549 | HC_vs_MS.NoTrt_B |
| SNRPD2     | 8.06E-07 | -0.3902 | 0.51  | 0.7  | 0.012881 | HC_vs_MS.NoTrt_B |
| PSMC5      | 8.95E-07 | -0.6312 | 0.235 | 0.42 | 0.014295 | HC_vs_MS.NoTrt_B |
| CACNA1A    | 9.96E-07 | 0.29596 | 1     | 1    | 0.015911 | HC_vs_MS.NoTrt_B |
| COPS9      | 1.00E-06 | -0.482  | 0.113 | 0.26 | 0.016014 | HC_vs_MS.NoTrt_B |

|            |          |         |       |      |          |                  |
|------------|----------|---------|-------|------|----------|------------------|
| CD3D       | 1.01E-06 | -0.278  | 0.528 | 0.77 | 0.016132 | HC_vs_MS.NoTrt_B |
| SLC15A1    | 1.02E-06 | 0.4266  | 0.838 | 0.74 | 0.016295 | HC_vs_MS.NoTrt_B |
| GARS       | 1.11E-06 | -0.5445 | 0.136 | 0.29 | 0.017683 | HC_vs_MS.NoTrt_B |
| NASP       | 1.16E-06 | 0.70284 | 0.92  | 0.88 | 0.01855  | HC_vs_MS.NoTrt_B |
| TMEM14C    | 1.17E-06 | -0.6725 | 0.081 | 0.21 | 0.018755 | HC_vs_MS.NoTrt_B |
| FBXO7      | 1.19E-06 | -0.4638 | 0.264 | 0.44 | 0.019011 | HC_vs_MS.NoTrt_B |
| OAZ1       | 1.22E-06 | -0.3217 | 0.796 | 0.91 | 0.019514 | HC_vs_MS.NoTrt_B |
| ATP6V1G1   | 1.24E-06 | -0.2977 | 0.426 | 0.64 | 0.019857 | HC_vs_MS.NoTrt_B |
| PFN1       | 1.34E-06 | -0.2605 | 0.952 | 1    | 0.021423 | HC_vs_MS.NoTrt_B |
| IL2RA      | 1.35E-06 | -0.5582 | 0.335 | 0.51 | 0.02153  | HC_vs_MS.NoTrt_B |
| ABCC9      | 1.41E-06 | 0.50711 | 0.959 | 0.95 | 0.022593 | HC_vs_MS.NoTrt_B |
| 1-Sep      | 1.44E-06 | -0.3154 | 0.665 | 0.84 | 0.022991 | HC_vs_MS.NoTrt_B |
| UBE2I      | 1.47E-06 | -0.3164 | 0.52  | 0.72 | 0.023517 | HC_vs_MS.NoTrt_B |
| RPL36A     | 1.49E-06 | -0.3908 | 0.713 | 0.84 | 0.023866 | HC_vs_MS.NoTrt_B |
| PSMD8      | 1.55E-06 | -0.6675 | 0.568 | 0.73 | 0.024735 | HC_vs_MS.NoTrt_B |
| GTF3A      | 1.57E-06 | -0.3125 | 0.394 | 0.63 | 0.025029 | HC_vs_MS.NoTrt_B |
| PKIG       | 1.66E-06 | 0.50481 | 0.626 | 0.54 | 0.026445 | HC_vs_MS.NoTrt_B |
| HOXB2      | 1.73E-06 | -0.3884 | 0.123 | 0.27 | 0.027703 | HC_vs_MS.NoTrt_B |
| FAM98C     | 1.89E-06 | 0.3392  | 0.968 | 0.99 | 0.030203 | HC_vs_MS.NoTrt_B |
| RP11-529K1 | 1.90E-06 | -0.7084 | 0.054 | 0.16 | 0.030278 | HC_vs_MS.NoTrt_B |
| TCEB2      | 1.94E-06 | -0.3423 | 0.301 | 0.5  | 0.030962 | HC_vs_MS.NoTrt_B |
| PSMB3      | 2.01E-06 | -0.3812 | 0.216 | 0.4  | 0.032131 | HC_vs_MS.NoTrt_B |
| CDKL5      | 2.08E-06 | 0.34957 | 0.932 | 0.94 | 0.033273 | HC_vs_MS.NoTrt_B |
| COPZ1      | 2.12E-06 | -0.4187 | 0.152 | 0.31 | 0.03379  | HC_vs_MS.NoTrt_B |
| MRPL28     | 2.13E-06 | -0.8472 | 0.083 | 0.21 | 0.03407  | HC_vs_MS.NoTrt_B |
| CCDC144A   | 2.22E-06 | 0.93531 | 0.878 | 0.84 | 0.035434 | HC_vs_MS.NoTrt_B |
| RACK1      | 2.26E-06 | -0.255  | 0.999 | 1    | 0.036172 | HC_vs_MS.NoTrt_B |
| ORC4       | 2.30E-06 | 0.52122 | 0.98  | 1    | 0.036768 | HC_vs_MS.NoTrt_B |
| TSTA3      | 2.36E-06 | -0.6448 | 0.114 | 0.25 | 0.037675 | HC_vs_MS.NoTrt_B |
| EIF4H      | 2.42E-06 | -0.371  | 0.346 | 0.55 | 0.038632 | HC_vs_MS.NoTrt_B |
| NUPR1      | 2.43E-06 | 0.31926 | 0.941 | 0.96 | 0.03875  | HC_vs_MS.NoTrt_B |
| C4orf32    | 2.57E-06 | 0.38995 | 0.986 | 1    | 0.041046 | HC_vs_MS.NoTrt_B |
| APOL2      | 2.70E-06 | -0.3693 | 0.561 | 0.7  | 0.043125 | HC_vs_MS.NoTrt_B |
| GPS2       | 2.71E-06 | -0.4784 | 0.193 | 0.36 | 0.043213 | HC_vs_MS.NoTrt_B |
| CTLA4      | 2.73E-06 | -0.5181 | 0.248 | 0.41 | 0.043649 | HC_vs_MS.NoTrt_B |
| KPNA5      | 2.78E-06 | 0.40835 | 0.983 | 0.98 | 0.044472 | HC_vs_MS.NoTrt_B |
| SELT       | 2.80E-06 | -0.5634 | 0.306 | 0.47 | 0.044757 | HC_vs_MS.NoTrt_B |
| EEF1B2     | 2.81E-06 | -0.329  | 0.467 | 0.7  | 0.044925 | HC_vs_MS.NoTrt_B |
| ARPC3      | 2.83E-06 | -0.3577 | 0.428 | 0.64 | 0.04521  | HC_vs_MS.NoTrt_B |
| RASGRP3    | 2.86E-06 | 0.26265 | 0.991 | 1    | 0.045678 | HC_vs_MS.NoTrt_B |

|         |          |         |       |      |          |                  |
|---------|----------|---------|-------|------|----------|------------------|
| WDR31   | 2.99E-06 | 0.48237 | 0.836 | 0.81 | 0.047783 | HC_vs_MS.NoTrt_B |
| RNF26   | 2.99E-06 | -0.5553 | 0.077 | 0.2  | 0.047796 | HC_vs_MS.NoTrt_B |
| DGCR2   | 3.35E-06 | -0.4568 | 0.18  | 0.34 | 0.053589 | HC_vs_MS.NoTrt_B |
| DIRAS2  | 3.47E-06 | 0.5663  | 0.787 | 0.75 | 0.055449 | HC_vs_MS.NoTrt_B |
| TUBA1A  | 3.54E-06 | -0.6566 | 0.186 | 0.34 | 0.056505 | HC_vs_MS.NoTrt_B |
| MCM7    | 3.54E-06 | -0.5932 | 0.18  | 0.33 | 0.056572 | HC_vs_MS.NoTrt_B |
| TWF2    | 3.62E-06 | -0.4893 | 0.168 | 0.32 | 0.057859 | HC_vs_MS.NoTrt_B |
| HMGB2   | 3.74E-06 | -0.5999 | 0.22  | 0.39 | 0.059663 | HC_vs_MS.NoTrt_B |
| PYM1    | 3.92E-06 | -0.5613 | 0.245 | 0.41 | 0.062644 | HC_vs_MS.NoTrt_B |
| TMEM182 | 3.95E-06 | 0.73827 | 0.762 | 0.79 | 0.063057 | HC_vs_MS.NoTrt_B |
| SHISA9  | 4.04E-06 | 0.4045  | 0.925 | 0.95 | 0.064499 | HC_vs_MS.NoTrt_B |
| CBR4    | 4.20E-06 | -0.2929 | 0.135 | 0.28 | 0.067161 | HC_vs_MS.NoTrt_B |
| UCP2    | 4.32E-06 | -0.4115 | 0.738 | 0.86 | 0.068942 | HC_vs_MS.NoTrt_B |
| TRPC3   | 4.36E-06 | 0.42327 | 0.362 | 0.18 | 0.069699 | HC_vs_MS.NoTrt_B |
| FLII    | 4.58E-06 | -0.4288 | 0.172 | 0.33 | 0.07312  | HC_vs_MS.NoTrt_B |
| ELP5    | 4.63E-06 | -1.1769 | 0.054 | 0.15 | 0.074016 | HC_vs_MS.NoTrt_B |
| SEC61G  | 4.64E-06 | -0.6709 | 0.216 | 0.37 | 0.074192 | HC_vs_MS.NoTrt_B |
| DEF6    | 4.82E-06 | -0.3319 | 0.399 | 0.6  | 0.077007 | HC_vs_MS.NoTrt_B |
| GBP5    | 5.05E-06 | -0.3242 | 0.641 | 0.78 | 0.080731 | HC_vs_MS.NoTrt_B |
| WDPCP   | 5.24E-06 | 0.46984 | 0.971 | 0.98 | 0.083654 | HC_vs_MS.NoTrt_B |
| TMC2    | 5.24E-06 | 0.54454 | 0.665 | 0.57 | 0.083678 | HC_vs_MS.NoTrt_B |
| RARRES3 | 5.24E-06 | -0.4886 | 0.277 | 0.46 | 0.083768 | HC_vs_MS.NoTrt_B |
| RPS10   | 5.25E-06 | -0.3881 | 0.041 | 0.13 | 0.083809 | HC_vs_MS.NoTrt_B |
| TMBIM6  | 5.26E-06 | -0.3163 | 0.809 | 0.92 | 0.084    | HC_vs_MS.NoTrt_B |
| RPLP2   | 5.34E-06 | -0.2999 | 0.777 | 0.96 | 0.085306 | HC_vs_MS.NoTrt_B |
| RABAC1  | 5.59E-06 | -0.5568 | 0.17  | 0.32 | 0.089273 | HC_vs_MS.NoTrt_B |
| HCST    | 5.62E-06 | -0.4341 | 0.287 | 0.48 | 0.089835 | HC_vs_MS.NoTrt_B |
| ITGB1   | 5.81E-06 | -0.351  | 0.617 | 0.76 | 0.092734 | HC_vs_MS.NoTrt_B |
| RPS6KA1 | 6.11E-06 | -0.6263 | 0.174 | 0.32 | 0.097613 | HC_vs_MS.NoTrt_B |
| MED23   | 6.19E-06 | -0.4416 | 0.213 | 0.37 | 0.098888 | HC_vs_MS.NoTrt_B |
| HINFP   | 6.36E-06 | 0.34703 | 0.99  | 0.99 | 0.101605 | HC_vs_MS.NoTrt_B |
| DNPH1   | 6.50E-06 | -0.495  | 0.104 | 0.23 | 0.103902 | HC_vs_MS.NoTrt_B |
| P2RY8   | 6.57E-06 | -0.5427 | 0.491 | 0.64 | 0.104891 | HC_vs_MS.NoTrt_B |
| TRIM56  | 6.64E-06 | 0.5329  | 0.964 | 0.98 | 0.10604  | HC_vs_MS.NoTrt_B |
| POLR2G  | 6.64E-06 | -0.4514 | 0.132 | 0.28 | 0.106097 | HC_vs_MS.NoTrt_B |
| NDUFB4  | 6.68E-06 | -0.3817 | 0.199 | 0.36 | 0.106691 | HC_vs_MS.NoTrt_B |
| DNAJC9  | 7.11E-06 | -0.6069 | 0.11  | 0.24 | 0.113636 | HC_vs_MS.NoTrt_B |
| LGALS3  | 7.19E-06 | -0.6508 | 0.528 | 0.67 | 0.114866 | HC_vs_MS.NoTrt_B |
| PYCARD  | 7.44E-06 | -0.6008 | 0.072 | 0.18 | 0.118804 | HC_vs_MS.NoTrt_B |
| IL10RA  | 7.75E-06 | -0.3278 | 0.613 | 0.75 | 0.123787 | HC_vs_MS.NoTrt_B |



|            |          |         |       |      |          |                  |
|------------|----------|---------|-------|------|----------|------------------|
| WDR45      | 7.81E-06 | -0.6302 | 0.549 | 0.72 | 0.124738 | HC_vs_MS.NoTrt_B |
| NUDT2      | 8.52E-06 | -1.0782 | 0.03  | 0.11 | 0.13614  | HC_vs_MS.NoTrt_B |
| CTB-133G6. | 8.52E-06 | -0.2622 | 0.268 | 0.45 | 0.136161 | HC_vs_MS.NoTrt_B |
| BLOC1S1    | 8.90E-06 | -0.5281 | 0.165 | 0.31 | 0.142188 | HC_vs_MS.NoTrt_B |
| ARHGAP25   | 9.01E-06 | -0.4358 | 0.425 | 0.59 | 0.143901 | HC_vs_MS.NoTrt_B |
| CD5        | 9.14E-06 | -0.3286 | 0.439 | 0.65 | 0.146002 | HC_vs_MS.NoTrt_B |
| ERAP2      | 9.27E-06 | -0.7805 | 0.619 | 0.72 | 0.147991 | HC_vs_MS.NoTrt_B |
| EZR        | 9.47E-06 | -0.449  | 0.63  | 0.74 | 0.151307 | HC_vs_MS.NoTrt_B |
| SAMD12     | 9.70E-06 | 0.45979 | 0.972 | 1    | 0.154947 | HC_vs_MS.NoTrt_B |
| MTRR       | 9.71E-06 | -0.3679 | 0.133 | 0.27 | 0.155143 | HC_vs_MS.NoTrt_B |
| COX6C      | 1.06E-05 | -0.3047 | 0.467 | 0.62 | 0.169422 | HC_vs_MS.NoTrt_B |
| DDRKG1     | 1.06E-05 | -0.7178 | 0.087 | 0.2  | 0.169886 | HC_vs_MS.NoTrt_B |
| CD74       | 1.08E-05 | -0.3457 | 0.694 | 0.81 | 0.172118 | HC_vs_MS.NoTrt_B |
| GLYCTK     | 1.08E-05 | -1.4398 | 0.067 | 0.17 | 0.173084 | HC_vs_MS.NoTrt_B |
| PDCD5      | 1.09E-05 | -0.4908 | 0.149 | 0.29 | 0.173414 | HC_vs_MS.NoTrt_B |
| KCNJ6      | 1.09E-05 | 1.15561 | 0.799 | 0.75 | 0.173895 | HC_vs_MS.NoTrt_B |
| ERP44      | 1.12E-05 | -0.4071 | 0.219 | 0.37 | 0.178714 | HC_vs_MS.NoTrt_B |
| CNN2       | 1.14E-05 | -0.4399 | 0.983 | 0.99 | 0.182119 | HC_vs_MS.NoTrt_B |
| MTRNR2L8   | 1.16E-05 | 0.27565 | 0.997 | 1    | 0.185735 | HC_vs_MS.NoTrt_B |
| PSMA7      | 1.17E-05 | -0.2862 | 0.367 | 0.55 | 0.186366 | HC_vs_MS.NoTrt_B |
| EID1       | 1.19E-05 | -0.3336 | 0.336 | 0.54 | 0.189764 | HC_vs_MS.NoTrt_B |
| FAM122C    | 1.21E-05 | 0.32808 | 0.901 | 0.91 | 0.193232 | HC_vs_MS.NoTrt_B |
| CASP8      | 1.26E-05 | -0.4933 | 0.914 | 0.95 | 0.201109 | HC_vs_MS.NoTrt_B |
| KYNU       | 1.26E-05 | 0.33024 | 0.968 | 0.99 | 0.201307 | HC_vs_MS.NoTrt_B |
| RPLP0      | 1.27E-05 | -0.2548 | 0.916 | 0.97 | 0.202907 | HC_vs_MS.NoTrt_B |
| MS4A10     | 1.30E-05 | 0.40763 | 0.683 | 0.56 | 0.207625 | HC_vs_MS.NoTrt_B |
| CST7       | 1.31E-05 | -0.7721 | 0.084 | 0.2  | 0.20875  | HC_vs_MS.NoTrt_B |
| RPS5       | 1.31E-05 | -0.2553 | 0.833 | 0.95 | 0.209403 | HC_vs_MS.NoTrt_B |
| CA5A       | 1.33E-05 | 0.3194  | 0.977 | 0.96 | 0.212702 | HC_vs_MS.NoTrt_B |
| MSH5       | 1.34E-05 | 0.54832 | 0.929 | 0.93 | 0.213976 | HC_vs_MS.NoTrt_B |
| REEP5      | 1.43E-05 | -0.265  | 0.293 | 0.45 | 0.227799 | HC_vs_MS.NoTrt_B |
| COX7A2     | 1.43E-05 | -0.363  | 0.719 | 0.82 | 0.229111 | HC_vs_MS.NoTrt_B |
| GJC1       | 1.46E-05 | 0.3455  | 0.938 | 0.94 | 0.232635 | HC_vs_MS.NoTrt_B |
| MAD1L1     | 1.48E-05 | -0.4397 | 0.284 | 0.45 | 0.236212 | HC_vs_MS.NoTrt_B |
| LDOC1      | 1.49E-05 | -0.9691 | 0.035 | 0.11 | 0.237621 | HC_vs_MS.NoTrt_B |
| MRPL33     | 1.60E-05 | -0.4951 | 0.11  | 0.23 | 0.254872 | HC_vs_MS.NoTrt_B |
| PEBP1      | 1.62E-05 | -0.391  | 0.341 | 0.52 | 0.259004 | HC_vs_MS.NoTrt_B |
| DOK2       | 1.66E-05 | -0.3901 | 0.333 | 0.51 | 0.265016 | HC_vs_MS.NoTrt_B |
| RNF181     | 1.73E-05 | -0.8344 | 0.139 | 0.27 | 0.276687 | HC_vs_MS.NoTrt_B |
| UQCR10     | 1.82E-05 | -0.37   | 0.288 | 0.45 | 0.290138 | HC_vs_MS.NoTrt_B |

|           |          |         |       |      |          |                  |
|-----------|----------|---------|-------|------|----------|------------------|
| TSC22D3   | 1.83E-05 | -0.3222 | 0.555 | 0.75 | 0.291629 | HC_vs_MS.NoTrt_B |
| CLIC1     | 1.85E-05 | -0.4707 | 0.543 | 0.69 | 0.294785 | HC_vs_MS.NoTrt_B |
| SPATA20   | 1.91E-05 | -1.1206 | 0.048 | 0.14 | 0.304351 | HC_vs_MS.NoTrt_B |
| SNRPC     | 1.91E-05 | -0.4005 | 0.172 | 0.32 | 0.305522 | HC_vs_MS.NoTrt_B |
| C12orf75  | 1.91E-05 | -0.2835 | 0.122 | 0.25 | 0.305607 | HC_vs_MS.NoTrt_B |
| ALDH2     | 1.96E-05 | 0.30954 | 0.965 | 0.97 | 0.313747 | HC_vs_MS.NoTrt_B |
| ARID4A    | 2.03E-05 | -0.3914 | 0.278 | 0.44 | 0.32398  | HC_vs_MS.NoTrt_B |
| METTL23   | 2.03E-05 | -0.2731 | 0.138 | 0.28 | 0.324737 | HC_vs_MS.NoTrt_B |
| MTRNR2L10 | 2.03E-05 | 0.35719 | 0.968 | 1    | 0.324881 | HC_vs_MS.NoTrt_B |
| MPG       | 2.07E-05 | -0.6021 | 0.094 | 0.21 | 0.330452 | HC_vs_MS.NoTrt_B |
| CD53      | 2.15E-05 | -0.2944 | 0.617 | 0.82 | 0.343098 | HC_vs_MS.NoTrt_B |
| YBEY      | 2.18E-05 | -1.0772 | 0.042 | 0.12 | 0.347484 | HC_vs_MS.NoTrt_B |
| MYO1G     | 2.19E-05 | -0.4263 | 0.529 | 0.68 | 0.350322 | HC_vs_MS.NoTrt_B |
| NAT6      | 2.34E-05 | -1.4199 | 0.03  | 0.1  | 0.373252 | HC_vs_MS.NoTrt_B |
| PSMB4     | 2.34E-05 | -0.2649 | 0.278 | 0.45 | 0.373263 | HC_vs_MS.NoTrt_B |
| EYS       | 2.37E-05 | 0.78462 | 0.809 | 0.77 | 0.378546 | HC_vs_MS.NoTrt_B |
| ATP5B     | 2.40E-05 | -0.3721 | 0.325 | 0.5  | 0.382977 | HC_vs_MS.NoTrt_B |
| TSSC1     | 2.44E-05 | -0.8106 | 0.065 | 0.16 | 0.390213 | HC_vs_MS.NoTrt_B |
| BLOC1S6   | 2.46E-05 | 0.47649 | 0.986 | 1    | 0.39329  | HC_vs_MS.NoTrt_B |
| KARS      | 2.47E-05 | -0.4918 | 0.236 | 0.39 | 0.394737 | HC_vs_MS.NoTrt_B |
| RPL31     | 2.50E-05 | -0.2514 | 0.8   | 0.94 | 0.399127 | HC_vs_MS.NoTrt_B |
| MTRNR2L1  | 2.51E-05 | 0.25549 | 0.997 | 1    | 0.400557 | HC_vs_MS.NoTrt_B |
| PTK2      | 2.52E-05 | 0.39265 | 0.948 | 0.91 | 0.402544 | HC_vs_MS.NoTrt_B |
| ARHGEF12  | 2.58E-05 | 0.34935 | 0.97  | 0.98 | 0.412876 | HC_vs_MS.NoTrt_B |
| MRPL55    | 2.60E-05 | -1.1705 | 0.062 | 0.16 | 0.415882 | HC_vs_MS.NoTrt_B |
| HDHD2     | 2.64E-05 | -0.6624 | 0.114 | 0.23 | 0.421838 | HC_vs_MS.NoTrt_B |
| NUP155    | 2.65E-05 | 0.87391 | 0.906 | 0.89 | 0.422877 | HC_vs_MS.NoTrt_B |
| MRPL51    | 2.67E-05 | -0.5367 | 0.083 | 0.19 | 0.426384 | HC_vs_MS.NoTrt_B |
| RASA4     | 2.69E-05 | -0.3307 | 0.664 | 0.77 | 0.429252 | HC_vs_MS.NoTrt_B |
| NDUFB7    | 2.75E-05 | -0.6213 | 0.155 | 0.29 | 0.439108 | HC_vs_MS.NoTrt_B |
| NDUFB8    | 2.76E-05 | -0.2862 | 0.291 | 0.47 | 0.441112 | HC_vs_MS.NoTrt_B |
| MRPL18    | 2.87E-05 | -0.3347 | 0.088 | 0.2  | 0.457988 | HC_vs_MS.NoTrt_B |
| PSME2     | 2.93E-05 | -0.4228 | 0.301 | 0.47 | 0.467226 | HC_vs_MS.NoTrt_B |
| APRT      | 3.03E-05 | -0.3558 | 0.33  | 0.51 | 0.483372 | HC_vs_MS.NoTrt_B |
| PPP1CA    | 3.15E-05 | -0.3742 | 0.414 | 0.6  | 0.503188 | HC_vs_MS.NoTrt_B |
| TTC7A     | 3.15E-05 | -0.4026 | 0.164 | 0.3  | 0.503502 | HC_vs_MS.NoTrt_B |
| ELAVL1    | 3.20E-05 | 0.47894 | 0.961 | 0.95 | 0.511223 | HC_vs_MS.NoTrt_B |
| PSMB10    | 3.46E-05 | -0.344  | 0.37  | 0.55 | 0.552633 | HC_vs_MS.NoTrt_B |
| HLA-F     | 3.52E-05 | -0.3569 | 0.517 | 0.65 | 0.561557 | HC_vs_MS.NoTrt_B |
| DRAP1     | 3.55E-05 | -0.3702 | 0.158 | 0.3  | 0.567369 | HC_vs_MS.NoTrt_B |

|          |          |         |       |      |          |                  |
|----------|----------|---------|-------|------|----------|------------------|
| TEX264   | 3.62E-05 | -0.5648 | 0.154 | 0.29 | 0.578396 | HC_vs_MS.NoTrt_B |
| CD247    | 3.68E-05 | -0.2733 | 0.438 | 0.63 | 0.587024 | HC_vs_MS.NoTrt_B |
| PLCXD1   | 3.70E-05 | 0.50296 | 0.919 | 0.91 | 0.590391 | HC_vs_MS.NoTrt_B |
| SBDS     | 3.80E-05 | -0.2517 | 0.259 | 0.42 | 0.606288 | HC_vs_MS.NoTrt_B |
| AQP3     | 3.81E-05 | -0.5818 | 0.262 | 0.41 | 0.6079   | HC_vs_MS.NoTrt_B |
| ZFAND2B  | 3.81E-05 | -0.6026 | 0.172 | 0.3  | 0.608199 | HC_vs_MS.NoTrt_B |
| NME2     | 3.83E-05 | -0.269  | 0.464 | 0.65 | 0.611262 | HC_vs_MS.NoTrt_B |
| RGS10    | 3.86E-05 | -0.6589 | 0.177 | 0.31 | 0.61652  | HC_vs_MS.NoTrt_B |
| FBXW5    | 3.90E-05 | -0.2954 | 0.197 | 0.35 | 0.622429 | HC_vs_MS.NoTrt_B |
| CEACAM1  | 3.91E-05 | 0.70584 | 0.79  | 0.69 | 0.625106 | HC_vs_MS.NoTrt_B |
| ZNF37A   | 3.97E-05 | 0.7882  | 0.874 | 0.85 | 0.634915 | HC_vs_MS.NoTrt_B |
| C11orf54 | 4.11E-05 | 0.56099 | 0.807 | 0.76 | 0.656223 | HC_vs_MS.NoTrt_B |
| TERB1    | 4.23E-05 | 0.40656 | 0.675 | 0.6  | 0.676155 | HC_vs_MS.NoTrt_B |
| RPS9     | 4.44E-05 | -0.2724 | 0.923 | 0.97 | 0.709773 | HC_vs_MS.NoTrt_B |
| FAM84B   | 4.50E-05 | -0.8517 | 0.041 | 0.12 | 0.718311 | HC_vs_MS.NoTrt_B |
| DHRS4    | 4.53E-05 | -0.8384 | 0.072 | 0.17 | 0.723555 | HC_vs_MS.NoTrt_B |
| TFPI     | 4.62E-05 | 0.41637 | 0.939 | 0.98 | 0.738444 | HC_vs_MS.NoTrt_B |
| ACTN4    | 4.64E-05 | -0.4394 | 0.309 | 0.46 | 0.741665 | HC_vs_MS.NoTrt_B |
| SSBP2    | 4.87E-05 | 0.34001 | 0.925 | 0.92 | 0.777907 | HC_vs_MS.NoTrt_B |
| HCLS1    | 4.93E-05 | -0.2542 | 0.562 | 0.75 | 0.787707 | HC_vs_MS.NoTrt_B |
| POMP     | 5.07E-05 | -0.5604 | 0.167 | 0.3  | 0.809839 | HC_vs_MS.NoTrt_B |
| TMEM256  | 5.11E-05 | -0.3989 | 0.046 | 0.13 | 0.816249 | HC_vs_MS.NoTrt_B |
| LGALS1   | 5.27E-05 | -0.6499 | 0.175 | 0.31 | 0.841631 | HC_vs_MS.NoTrt_B |
| PBXIP1   | 5.47E-05 | -0.3025 | 0.539 | 0.71 | 0.874037 | HC_vs_MS.NoTrt_B |
| CCDC122  | 5.63E-05 | 0.36203 | 0.909 | 0.91 | 0.899086 | HC_vs_MS.NoTrt_B |
| PERP     | 5.80E-05 | -1.1    | 0.042 | 0.12 | 0.926762 | HC_vs_MS.NoTrt_B |
| COA3     | 5.82E-05 | -0.6812 | 0.075 | 0.17 | 0.929853 | HC_vs_MS.NoTrt_B |
| VDAC3    | 6.19E-05 | -0.4573 | 0.196 | 0.34 | 0.988743 | HC_vs_MS.NoTrt_B |
| FAM118A  | 6.20E-05 | -0.5913 | 0.52  | 0.68 | 0.990775 | HC_vs_MS.NoTrt_B |
| SNRPE    | 6.32E-05 | -0.2943 | 0.11  | 0.23 | 1        | HC_vs_MS.NoTrt_B |
| AFMID    | 6.52E-05 | 0.37121 | 0.93  | 0.9  | 1        | HC_vs_MS.NoTrt_B |
| ZSCAN5A  | 6.59E-05 | 0.43962 | 0.788 | 0.7  | 1        | HC_vs_MS.NoTrt_B |
| SLAMF1   | 6.70E-05 | -0.2776 | 0.177 | 0.32 | 1        | HC_vs_MS.NoTrt_B |
| CCR8     | 6.73E-05 | -0.9765 | 0.087 | 0.19 | 1        | HC_vs_MS.NoTrt_B |
| FGD3     | 6.80E-05 | -0.3037 | 0.516 | 0.68 | 1        | HC_vs_MS.NoTrt_B |
| ZNF431   | 6.81E-05 | 0.51735 | 0.987 | 1    | 1        | HC_vs_MS.NoTrt_B |
| C1D      | 6.92E-05 | -0.4802 | 0.093 | 0.2  | 1        | HC_vs_MS.NoTrt_B |
| SLC19A3  | 7.08E-05 | 0.32829 | 0.8   | 0.73 | 1        | HC_vs_MS.NoTrt_B |
| GLB1     | 7.10E-05 | -0.7105 | 0.201 | 0.34 | 1        | HC_vs_MS.NoTrt_B |
| MRPS34   | 7.32E-05 | -0.3859 | 0.138 | 0.27 | 1        | HC_vs_MS.NoTrt_B |

|          |          |         |       |      |   |                  |
|----------|----------|---------|-------|------|---|------------------|
| ZNF268   | 7.33E-05 | 0.2577  | 0.958 | 0.92 | 1 | HC_vs_MS.NoTrt_B |
| CRYZ     | 7.33E-05 | -0.4644 | 0.055 | 0.14 | 1 | HC_vs_MS.NoTrt_B |
| MTRNR2L6 | 7.63E-05 | 0.30619 | 0.974 | 1    | 1 | HC_vs_MS.NoTrt_B |
| CHTF8    | 7.66E-05 | -0.4641 | 0.217 | 0.35 | 1 | HC_vs_MS.NoTrt_B |
| HARS2    | 7.87E-05 | -0.5061 | 0.106 | 0.22 | 1 | HC_vs_MS.NoTrt_B |
| AP1S1    | 7.90E-05 | -0.6218 | 0.039 | 0.11 | 1 | HC_vs_MS.NoTrt_B |
| RPS6KA5  | 7.94E-05 | 0.37181 | 0.999 | 1    | 1 | HC_vs_MS.NoTrt_B |
| TMEM212  | 8.19E-05 | 0.45266 | 0.942 | 0.95 | 1 | HC_vs_MS.NoTrt_B |
| FAHD2B   | 8.40E-05 | -1.006  | 0.112 | 0.22 | 1 | HC_vs_MS.NoTrt_B |
| CCDC125  | 8.57E-05 | 0.52229 | 0.936 | 0.96 | 1 | HC_vs_MS.NoTrt_B |
| R3HDM1   | 8.61E-05 | 0.78652 | 0.838 | 0.84 | 1 | HC_vs_MS.NoTrt_B |
| KDEL2    | 8.67E-05 | -0.451  | 0.117 | 0.23 | 1 | HC_vs_MS.NoTrt_B |
| PARP1    | 8.91E-05 | -0.4342 | 0.313 | 0.45 | 1 | HC_vs_MS.NoTrt_B |
| FDXR     | 9.05E-05 | -0.8098 | 0.033 | 0.1  | 1 | HC_vs_MS.NoTrt_B |
| INSIG1   | 9.26E-05 | -0.3335 | 0.084 | 0.18 | 1 | HC_vs_MS.NoTrt_B |
| ARSD     | 9.34E-05 | 0.59573 | 0.822 | 0.82 | 1 | HC_vs_MS.NoTrt_B |
| EGLN2    | 9.44E-05 | -0.2969 | 0.232 | 0.38 | 1 | HC_vs_MS.NoTrt_B |
| CNKSR3   | 9.71E-05 | 0.31191 | 0.975 | 1    | 1 | HC_vs_MS.NoTrt_B |
| MPC1     | 9.73E-05 | -0.4726 | 0.077 | 0.17 | 1 | HC_vs_MS.NoTrt_B |
| NDUFA2   | 9.83E-05 | -0.3252 | 0.445 | 0.58 | 1 | HC_vs_MS.NoTrt_B |
| IMPDH1   | 9.84E-05 | -0.8533 | 0.101 | 0.21 | 1 | HC_vs_MS.NoTrt_B |
| PPM1M    | 9.92E-05 | -0.405  | 0.133 | 0.25 | 1 | HC_vs_MS.NoTrt_B |
| TRMT1L   | 9.95E-05 | -1.0943 | 0.054 | 0.14 | 1 | HC_vs_MS.NoTrt_B |
| ODF2L    | 1.02E-04 | 0.25046 | 0.951 | 0.92 | 1 | HC_vs_MS.NoTrt_B |
| SCD5     | 1.06E-04 | 0.44731 | 0.803 | 0.75 | 1 | HC_vs_MS.NoTrt_B |
| PKP2     | 1.07E-04 | 0.34455 | 0.594 | 0.47 | 1 | HC_vs_MS.NoTrt_B |
| RBX1     | 1.08E-04 | -0.4273 | 0.23  | 0.37 | 1 | HC_vs_MS.NoTrt_B |
| MYLK3    | 1.09E-04 | 0.38757 | 0.922 | 0.94 | 1 | HC_vs_MS.NoTrt_B |
| MGAT4C   | 1.14E-04 | 0.44529 | 0.777 | 0.68 | 1 | HC_vs_MS.NoTrt_B |
| TMEM107  | 1.15E-04 | 0.71357 | 0.583 | 0.45 | 1 | HC_vs_MS.NoTrt_B |
| LITAF    | 1.16E-04 | -0.3191 | 0.533 | 0.65 | 1 | HC_vs_MS.NoTrt_B |
| PQLC3    | 1.17E-04 | -0.4519 | 0.12  | 0.23 | 1 | HC_vs_MS.NoTrt_B |
| S100A11  | 1.18E-04 | -0.2507 | 0.301 | 0.47 | 1 | HC_vs_MS.NoTrt_B |
| CYSLTR1  | 1.19E-04 | 0.51576 | 0.946 | 0.92 | 1 | HC_vs_MS.NoTrt_B |
| CYP1A2   | 1.20E-04 | 0.45337 | 0.864 | 0.8  | 1 | HC_vs_MS.NoTrt_B |
| PPDPF    | 1.21E-04 | 1.04247 | 0.433 | 0.35 | 1 | HC_vs_MS.NoTrt_B |
| UBE2L3   | 1.22E-04 | -0.2933 | 0.241 | 0.38 | 1 | HC_vs_MS.NoTrt_B |
| TMEM213  | 1.22E-04 | 0.4293  | 0.816 | 0.75 | 1 | HC_vs_MS.NoTrt_B |
| ADAMTSL3 | 1.23E-04 | 0.35941 | 0.945 | 0.98 | 1 | HC_vs_MS.NoTrt_B |
| PPIB     | 1.24E-04 | -0.4423 | 0.677 | 0.74 | 1 | HC_vs_MS.NoTrt_B |

|            |          |         |       |      |   |                  |
|------------|----------|---------|-------|------|---|------------------|
| ATP5J2     | 1.24E-04 | -0.3041 | 0.278 | 0.43 | 1 | HC_vs_MS.NoTrt_B |
| CCDC115    | 1.26E-04 | -0.6916 | 0.086 | 0.18 | 1 | HC_vs_MS.NoTrt_B |
| CACNB3     | 1.26E-04 | 0.86457 | 0.633 | 0.56 | 1 | HC_vs_MS.NoTrt_B |
| RP4-583P15 | 1.31E-04 | 0.35066 | 0.099 | 0.21 | 1 | HC_vs_MS.NoTrt_B |
| NCL        | 1.33E-04 | -0.3239 | 0.499 | 0.64 | 1 | HC_vs_MS.NoTrt_B |
| HINT2      | 1.36E-04 | -0.7462 | 0.071 | 0.16 | 1 | HC_vs_MS.NoTrt_B |
| LSM4       | 1.37E-04 | -0.3599 | 0.165 | 0.3  | 1 | HC_vs_MS.NoTrt_B |
| SLC1A6     | 1.39E-04 | 0.39501 | 0.799 | 0.7  | 1 | HC_vs_MS.NoTrt_B |
| MIXL1      | 1.44E-04 | 0.37252 | 0.577 | 0.42 | 1 | HC_vs_MS.NoTrt_B |
| AKT1S1     | 1.46E-04 | -0.4101 | 0.136 | 0.25 | 1 | HC_vs_MS.NoTrt_B |
| STARD9     | 1.49E-04 | 0.5068  | 0.903 | 0.93 | 1 | HC_vs_MS.NoTrt_B |
| MGAT1      | 1.50E-04 | -0.442  | 0.487 | 0.63 | 1 | HC_vs_MS.NoTrt_B |
| KCNE4      | 1.50E-04 | 0.45638 | 0.864 | 0.87 | 1 | HC_vs_MS.NoTrt_B |
| SLC3A2     | 1.50E-04 | -0.6202 | 0.441 | 0.56 | 1 | HC_vs_MS.NoTrt_B |
| NONO       | 1.51E-04 | -0.2726 | 0.651 | 0.78 | 1 | HC_vs_MS.NoTrt_B |
| USP8       | 1.53E-04 | 0.26586 | 0.99  | 0.99 | 1 | HC_vs_MS.NoTrt_B |
| TRABD      | 1.53E-04 | -0.3159 | 0.32  | 0.46 | 1 | HC_vs_MS.NoTrt_B |
| FARP1      | 1.53E-04 | 0.44881 | 0.954 | 0.95 | 1 | HC_vs_MS.NoTrt_B |
| SLBP       | 1.54E-04 | -0.4153 | 0.097 | 0.2  | 1 | HC_vs_MS.NoTrt_B |
| THEMIS2    | 1.55E-04 | -0.5207 | 0.094 | 0.2  | 1 | HC_vs_MS.NoTrt_B |
| PA2G4      | 1.58E-04 | -0.3404 | 0.339 | 0.49 | 1 | HC_vs_MS.NoTrt_B |
| ATP5O      | 1.59E-04 | -0.3792 | 0.367 | 0.52 | 1 | HC_vs_MS.NoTrt_B |
| WTIP       | 1.59E-04 | 0.36716 | 0.964 | 0.97 | 1 | HC_vs_MS.NoTrt_B |
| GLOD4      | 1.64E-04 | -0.4774 | 0.612 | 0.72 | 1 | HC_vs_MS.NoTrt_B |
| MRPS6      | 1.66E-04 | -0.4711 | 0.148 | 0.27 | 1 | HC_vs_MS.NoTrt_B |
| TUFM       | 1.66E-04 | -0.2665 | 0.243 | 0.4  | 1 | HC_vs_MS.NoTrt_B |
| OPHN1      | 1.68E-04 | 0.38957 | 0.949 | 0.97 | 1 | HC_vs_MS.NoTrt_B |
| HSPA1B     | 1.68E-04 | 0.66864 | 0.201 | 0.08 | 1 | HC_vs_MS.NoTrt_B |
| MRPL11     | 1.69E-04 | -0.6995 | 0.08  | 0.17 | 1 | HC_vs_MS.NoTrt_B |
| HLA-DRB1   | 1.69E-04 | -0.8313 | 0.174 | 0.29 | 1 | HC_vs_MS.NoTrt_B |
| CAPN2      | 1.77E-04 | -0.4268 | 0.742 | 0.85 | 1 | HC_vs_MS.NoTrt_B |
| IK         | 1.78E-04 | -0.3941 | 0.79  | 0.87 | 1 | HC_vs_MS.NoTrt_B |
| RPL39      | 1.82E-04 | -0.3173 | 0.736 | 0.92 | 1 | HC_vs_MS.NoTrt_B |
| SIT1       | 1.87E-04 | -0.3054 | 0.219 | 0.36 | 1 | HC_vs_MS.NoTrt_B |
| IRF3       | 1.87E-04 | -0.5153 | 0.749 | 0.82 | 1 | HC_vs_MS.NoTrt_B |
| TACC2      | 1.88E-04 | 0.371   | 0.9   | 0.91 | 1 | HC_vs_MS.NoTrt_B |
| PSMC3      | 1.90E-04 | -0.491  | 0.103 | 0.21 | 1 | HC_vs_MS.NoTrt_B |
| BEX3       | 1.90E-04 | -0.3641 | 0.104 | 0.21 | 1 | HC_vs_MS.NoTrt_B |
| ARHGAP4    | 1.92E-04 | -0.305  | 0.429 | 0.58 | 1 | HC_vs_MS.NoTrt_B |
| SAG        | 1.92E-04 | 0.28359 | 0.942 | 0.98 | 1 | HC_vs_MS.NoTrt_B |

|           |          |         |       |      |   |                  |
|-----------|----------|---------|-------|------|---|------------------|
| PPP6C     | 1.93E-04 | -0.3887 | 0.175 | 0.3  | 1 | HC_vs_MS.NoTrt_B |
| LAMTOR2   | 1.94E-04 | -0.4693 | 0.077 | 0.17 | 1 | HC_vs_MS.NoTrt_B |
| UBXN1     | 2.01E-04 | -0.352  | 0.241 | 0.39 | 1 | HC_vs_MS.NoTrt_B |
| GRK4      | 2.01E-04 | 0.52392 | 0.565 | 0.45 | 1 | HC_vs_MS.NoTrt_B |
| ZFP36L2   | 2.03E-04 | 1.19553 | 0.533 | 0.45 | 1 | HC_vs_MS.NoTrt_B |
| PTPMT1    | 2.09E-04 | -0.4932 | 0.08  | 0.17 | 1 | HC_vs_MS.NoTrt_B |
| NDUFC1    | 2.13E-04 | -0.3512 | 0.2   | 0.34 | 1 | HC_vs_MS.NoTrt_B |
| ASNA1     | 2.17E-04 | -0.7398 | 0.042 | 0.11 | 1 | HC_vs_MS.NoTrt_B |
| TDP2      | 2.19E-04 | -0.5417 | 0.094 | 0.19 | 1 | HC_vs_MS.NoTrt_B |
| TNFRSF1B  | 2.23E-04 | -0.4005 | 0.723 | 0.76 | 1 | HC_vs_MS.NoTrt_B |
| SF3B4     | 2.24E-04 | -0.5172 | 0.172 | 0.29 | 1 | HC_vs_MS.NoTrt_B |
| FCRL3     | 2.26E-04 | 0.75895 | 0.397 | 0.25 | 1 | HC_vs_MS.NoTrt_B |
| MMACHC    | 2.27E-04 | 0.53234 | 0.846 | 0.82 | 1 | HC_vs_MS.NoTrt_B |
| NDUFS2    | 2.28E-04 | -0.5457 | 0.384 | 0.5  | 1 | HC_vs_MS.NoTrt_B |
| LRR1      | 2.31E-04 | -1.6411 | 0.072 | 0.16 | 1 | HC_vs_MS.NoTrt_B |
| CPAMD8    | 2.33E-04 | 0.46267 | 0.699 | 0.61 | 1 | HC_vs_MS.NoTrt_B |
| DNAJB11   | 2.34E-04 | -0.3552 | 0.142 | 0.25 | 1 | HC_vs_MS.NoTrt_B |
| MYDGF     | 2.36E-04 | -0.591  | 0.113 | 0.22 | 1 | HC_vs_MS.NoTrt_B |
| NPEPL1    | 2.41E-04 | -0.3205 | 0.11  | 0.22 | 1 | HC_vs_MS.NoTrt_B |
| NCBP2-AS2 | 2.44E-04 | -0.3379 | 0.116 | 0.23 | 1 | HC_vs_MS.NoTrt_B |
| RNF7      | 2.45E-04 | -0.4929 | 0.609 | 0.72 | 1 | HC_vs_MS.NoTrt_B |
| ITGB1BP1  | 2.46E-04 | -0.3393 | 0.141 | 0.25 | 1 | HC_vs_MS.NoTrt_B |
| C10orf95  | 2.49E-04 | -0.7197 | 0.162 | 0.27 | 1 | HC_vs_MS.NoTrt_B |
| ZNF124    | 2.50E-04 | 1.33847 | 0.665 | 0.63 | 1 | HC_vs_MS.NoTrt_B |
| JTB       | 2.52E-04 | -0.3868 | 0.21  | 0.35 | 1 | HC_vs_MS.NoTrt_B |
| CTSD      | 2.53E-04 | -0.5466 | 0.158 | 0.28 | 1 | HC_vs_MS.NoTrt_B |
| TNFRSF25  | 2.57E-04 | -0.2774 | 0.664 | 0.76 | 1 | HC_vs_MS.NoTrt_B |
| SLC36A3   | 2.62E-04 | 0.40005 | 0.441 | 0.31 | 1 | HC_vs_MS.NoTrt_B |
| HAMP      | 2.63E-04 | 0.38365 | 0.823 | 0.8  | 1 | HC_vs_MS.NoTrt_B |
| ZNF776    | 2.68E-04 | 0.49753 | 0.751 | 0.68 | 1 | HC_vs_MS.NoTrt_B |
| ZNF891    | 2.69E-04 | 0.58085 | 0.958 | 0.97 | 1 | HC_vs_MS.NoTrt_B |
| AP5M1     | 2.69E-04 | -0.2594 | 0.109 | 0.21 | 1 | HC_vs_MS.NoTrt_B |
| KIAA1328  | 2.70E-04 | 0.42073 | 0.968 | 1    | 1 | HC_vs_MS.NoTrt_B |
| PTPRCAP   | 2.71E-04 | -0.3518 | 0.67  | 0.78 | 1 | HC_vs_MS.NoTrt_B |
| LRRC2     | 2.71E-04 | 0.62787 | 0.762 | 0.68 | 1 | HC_vs_MS.NoTrt_B |
| C19orf53  | 2.72E-04 | -0.2882 | 0.371 | 0.51 | 1 | HC_vs_MS.NoTrt_B |
| LIPG      | 2.77E-04 | 0.32813 | 0.858 | 0.81 | 1 | HC_vs_MS.NoTrt_B |
| ACP5      | 2.79E-04 | -0.6998 | 0.094 | 0.19 | 1 | HC_vs_MS.NoTrt_B |
| ZNF785    | 2.80E-04 | 0.32746 | 0.906 | 0.9  | 1 | HC_vs_MS.NoTrt_B |
| GPATCH2   | 2.81E-04 | 0.47938 | 0.504 | 0.36 | 1 | HC_vs_MS.NoTrt_B |

|          |          |         |       |      |   |                  |
|----------|----------|---------|-------|------|---|------------------|
| ZYX      | 2.81E-04 | -0.321  | 0.239 | 0.38 | 1 | HC_vs_MS.NoTrt_B |
| CBR1     | 2.81E-04 | -0.4333 | 0.057 | 0.14 | 1 | HC_vs_MS.NoTrt_B |
| ATP1B3   | 2.83E-04 | -0.5193 | 0.086 | 0.18 | 1 | HC_vs_MS.NoTrt_B |
| GLRX     | 2.86E-04 | -0.4179 | 0.683 | 0.78 | 1 | HC_vs_MS.NoTrt_B |
| FAM104A  | 2.87E-04 | -0.4539 | 0.159 | 0.28 | 1 | HC_vs_MS.NoTrt_B |
| HLA-DPA1 | 2.94E-04 | -0.5441 | 0.155 | 0.27 | 1 | HC_vs_MS.NoTrt_B |
| OPA3     | 2.97E-04 | 0.25528 | 0.978 | 0.97 | 1 | HC_vs_MS.NoTrt_B |
| CASP1    | 3.00E-04 | -0.2695 | 0.196 | 0.32 | 1 | HC_vs_MS.NoTrt_B |
| RNF166   | 3.01E-04 | -0.3258 | 0.187 | 0.31 | 1 | HC_vs_MS.NoTrt_B |
| MRPS9    | 3.05E-04 | -0.6337 | 0.087 | 0.18 | 1 | HC_vs_MS.NoTrt_B |
| NUCB2    | 3.06E-04 | 0.738   | 0.971 | 0.94 | 1 | HC_vs_MS.NoTrt_B |
| ZBTB43   | 3.07E-04 | 0.6641  | 0.717 | 0.62 | 1 | HC_vs_MS.NoTrt_B |
| CASP10   | 3.12E-04 | 0.34973 | 0.91  | 0.88 | 1 | HC_vs_MS.NoTrt_B |
| ZNF546   | 3.12E-04 | 0.50803 | 0.893 | 0.91 | 1 | HC_vs_MS.NoTrt_B |
| RCN1     | 3.13E-04 | -0.5772 | 0.068 | 0.15 | 1 | HC_vs_MS.NoTrt_B |
| ZNF814   | 3.18E-04 | 0.45422 | 0.954 | 0.94 | 1 | HC_vs_MS.NoTrt_B |
| SVBP     | 3.18E-04 | -0.9483 | 0.097 | 0.19 | 1 | HC_vs_MS.NoTrt_B |
| MDH2     | 3.33E-04 | -0.4652 | 0.18  | 0.3  | 1 | HC_vs_MS.NoTrt_B |
| ZNF253   | 3.33E-04 | 0.40047 | 0.672 | 0.53 | 1 | HC_vs_MS.NoTrt_B |
| DNASE1   | 3.34E-04 | 0.52734 | 0.9   | 0.86 | 1 | HC_vs_MS.NoTrt_B |
| SGSM3    | 3.36E-04 | -0.3399 | 0.146 | 0.26 | 1 | HC_vs_MS.NoTrt_B |
| CWC15    | 3.37E-04 | -0.3072 | 0.19  | 0.31 | 1 | HC_vs_MS.NoTrt_B |
| HMG3     | 3.42E-04 | -0.2789 | 0.17  | 0.29 | 1 | HC_vs_MS.NoTrt_B |
| ZBTB8A   | 3.46E-04 | 0.27837 | 0.939 | 0.94 | 1 | HC_vs_MS.NoTrt_B |
| TBC1D8   | 3.48E-04 | 0.34285 | 0.425 | 0.61 | 1 | HC_vs_MS.NoTrt_B |
| RNF114   | 3.51E-04 | -0.3717 | 0.694 | 0.83 | 1 | HC_vs_MS.NoTrt_B |
| MDM2     | 3.53E-04 | 0.49365 | 0.991 | 1    | 1 | HC_vs_MS.NoTrt_B |
| TMEM179B | 3.57E-04 | -0.4205 | 0.175 | 0.3  | 1 | HC_vs_MS.NoTrt_B |
| CD3EAP   | 3.58E-04 | 0.27588 | 0.825 | 0.71 | 1 | HC_vs_MS.NoTrt_B |
| ATP10B   | 3.65E-04 | 0.74245 | 0.716 | 0.69 | 1 | HC_vs_MS.NoTrt_B |
| ADRM1    | 3.69E-04 | -0.4489 | 0.172 | 0.29 | 1 | HC_vs_MS.NoTrt_B |
| SAFB     | 3.79E-04 | -0.4221 | 0.345 | 0.46 | 1 | HC_vs_MS.NoTrt_B |
| TMED9    | 3.79E-04 | -0.4208 | 0.278 | 0.41 | 1 | HC_vs_MS.NoTrt_B |
| PTTG1    | 3.85E-04 | -0.4672 | 0.075 | 0.16 | 1 | HC_vs_MS.NoTrt_B |
| PSKH1    | 3.94E-04 | -1.3191 | 0.059 | 0.14 | 1 | HC_vs_MS.NoTrt_B |
| PAPD4    | 4.01E-04 | -0.4686 | 0.226 | 0.35 | 1 | HC_vs_MS.NoTrt_B |
| PIAS2    | 4.01E-04 | 1.03595 | 0.777 | 0.7  | 1 | HC_vs_MS.NoTrt_B |
| ROMO1    | 4.05E-04 | -0.4124 | 0.139 | 0.25 | 1 | HC_vs_MS.NoTrt_B |
| SMIM10L1 | 4.07E-04 | -0.447  | 0.165 | 0.28 | 1 | HC_vs_MS.NoTrt_B |
| OPN3     | 4.20E-04 | 0.87054 | 0.294 | 0.17 | 1 | HC_vs_MS.NoTrt_B |

|            |          |         |       |      |   |                  |
|------------|----------|---------|-------|------|---|------------------|
| CYBRD1     | 4.24E-04 | 0.3917  | 0.833 | 0.82 | 1 | HC_vs_MS.NoTrt_B |
| SLC44A1    | 4.26E-04 | 0.86474 | 0.628 | 0.54 | 1 | HC_vs_MS.NoTrt_B |
| CD48       | 4.35E-04 | -0.2509 | 0.241 | 0.38 | 1 | HC_vs_MS.NoTrt_B |
| RNASEK     | 4.44E-04 | -0.4254 | 0.696 | 0.73 | 1 | HC_vs_MS.NoTrt_B |
| CSNK2B     | 4.45E-04 | -0.3472 | 0.625 | 0.74 | 1 | HC_vs_MS.NoTrt_B |
| ACLY       | 4.49E-04 | -0.2673 | 0.181 | 0.3  | 1 | HC_vs_MS.NoTrt_B |
| CCM2       | 4.50E-04 | -0.2617 | 0.649 | 0.74 | 1 | HC_vs_MS.NoTrt_B |
| SYNPO2L    | 4.51E-04 | 0.38495 | 0.526 | 0.38 | 1 | HC_vs_MS.NoTrt_B |
| SDAD1      | 4.59E-04 | -0.3845 | 0.138 | 0.24 | 1 | HC_vs_MS.NoTrt_B |
| CHMP6      | 4.66E-04 | -0.8188 | 0.052 | 0.12 | 1 | HC_vs_MS.NoTrt_B |
| ST3GAL2    | 4.70E-04 | 0.58797 | 0.938 | 0.97 | 1 | HC_vs_MS.NoTrt_B |
| MIEN1      | 4.72E-04 | -0.3724 | 0.087 | 0.18 | 1 | HC_vs_MS.NoTrt_B |
| CCDC57     | 4.73E-04 | 0.27912 | 0.991 | 1    | 1 | HC_vs_MS.NoTrt_B |
| ARHGAP22   | 4.75E-04 | 0.47364 | 0.643 | 0.57 | 1 | HC_vs_MS.NoTrt_B |
| MOSPD2     | 4.79E-04 | 0.80026 | 0.309 | 0.19 | 1 | HC_vs_MS.NoTrt_B |
| KLHL7      | 4.80E-04 | 0.52545 | 0.712 | 0.67 | 1 | HC_vs_MS.NoTrt_B |
| HNRNPH1    | 4.81E-04 | 0.31748 | 0.99  | 1    | 1 | HC_vs_MS.NoTrt_B |
| AC013461.1 | 4.82E-04 | 0.32198 | 0.81  | 0.76 | 1 | HC_vs_MS.NoTrt_B |
| PDIA3      | 4.90E-04 | -0.2513 | 0.309 | 0.45 | 1 | HC_vs_MS.NoTrt_B |
| SNRPB2     | 4.93E-04 | -0.3903 | 0.164 | 0.28 | 1 | HC_vs_MS.NoTrt_B |
| GLIPR1     | 4.95E-04 | -0.3269 | 0.216 | 0.34 | 1 | HC_vs_MS.NoTrt_B |
| SPG7       | 4.96E-04 | 0.41906 | 0.978 | 0.98 | 1 | HC_vs_MS.NoTrt_B |
| RP11-111M  | 5.06E-04 | 0.43281 | 0.862 | 0.88 | 1 | HC_vs_MS.NoTrt_B |
| MRPL9      | 5.08E-04 | -0.3648 | 0.168 | 0.28 | 1 | HC_vs_MS.NoTrt_B |
| ZNF445     | 5.09E-04 | 0.47645 | 0.978 | 0.98 | 1 | HC_vs_MS.NoTrt_B |
| ACAP1      | 5.18E-04 | -0.2693 | 0.893 | 0.93 | 1 | HC_vs_MS.NoTrt_B |
| C14orf166  | 5.28E-04 | -0.4144 | 0.526 | 0.64 | 1 | HC_vs_MS.NoTrt_B |
| ACP2       | 5.30E-04 | -1.0301 | 0.039 | 0.1  | 1 | HC_vs_MS.NoTrt_B |
| DPF2       | 5.32E-04 | 0.48899 | 0.901 | 0.87 | 1 | HC_vs_MS.NoTrt_B |
| HOOK3      | 5.37E-04 | 0.57806 | 0.935 | 0.95 | 1 | HC_vs_MS.NoTrt_B |
| DHX16      | 5.46E-04 | -0.3504 | 0.112 | 0.21 | 1 | HC_vs_MS.NoTrt_B |
| RHOG       | 5.46E-04 | -0.2751 | 0.314 | 0.46 | 1 | HC_vs_MS.NoTrt_B |
| SLC4A8     | 5.49E-04 | 0.51634 | 0.88  | 0.9  | 1 | HC_vs_MS.NoTrt_B |
| KLRD1      | 5.55E-04 | 0.31807 | 0.965 | 0.98 | 1 | HC_vs_MS.NoTrt_B |
| NDUFB10    | 5.64E-04 | -0.282  | 0.177 | 0.3  | 1 | HC_vs_MS.NoTrt_B |
| MARVELD2   | 5.67E-04 | 0.69802 | 0.59  | 0.53 | 1 | HC_vs_MS.NoTrt_B |
| CDC26      | 5.81E-04 | -0.2779 | 0.162 | 0.28 | 1 | HC_vs_MS.NoTrt_B |
| CRY1       | 5.81E-04 | -0.7073 | 0.091 | 0.18 | 1 | HC_vs_MS.NoTrt_B |
| ERICH1     | 5.82E-04 | -0.402  | 0.178 | 0.29 | 1 | HC_vs_MS.NoTrt_B |
| ZNF157     | 5.85E-04 | 0.44902 | 0.758 | 0.72 | 1 | HC_vs_MS.NoTrt_B |



|          |          |         |       |      |   |                  |
|----------|----------|---------|-------|------|---|------------------|
| GCNT2    | 5.89E-04 | 0.97514 | 0.732 | 0.67 | 1 | HC_vs_MS.NoTrt_B |
| SIVA1    | 5.90E-04 | -0.431  | 0.343 | 0.47 | 1 | HC_vs_MS.NoTrt_B |
| SMIM14   | 5.91E-04 | 0.3254  | 0.983 | 0.99 | 1 | HC_vs_MS.NoTrt_B |
| AURKAIP1 | 5.95E-04 | -0.3766 | 0.141 | 0.25 | 1 | HC_vs_MS.NoTrt_B |
| CHAF1B   | 5.97E-04 | 0.33144 | 0.932 | 0.94 | 1 | HC_vs_MS.NoTrt_B |
| ZNF737   | 5.97E-04 | 0.3091  | 0.833 | 0.82 | 1 | HC_vs_MS.NoTrt_B |
| TARSL2   | 6.04E-04 | 0.28486 | 0.97  | 0.98 | 1 | HC_vs_MS.NoTrt_B |
| RHBG     | 6.07E-04 | 0.33588 | 0.768 | 0.75 | 1 | HC_vs_MS.NoTrt_B |
| KCNJ3    | 6.08E-04 | 0.37788 | 0.214 | 0.1  | 1 | HC_vs_MS.NoTrt_B |
| H2AFJ    | 6.23E-04 | -0.4682 | 0.086 | 0.17 | 1 | HC_vs_MS.NoTrt_B |
| SPOCK2   | 6.28E-04 | -0.2532 | 0.594 | 0.71 | 1 | HC_vs_MS.NoTrt_B |
| TAOK1    | 6.36E-04 | 0.90824 | 0.906 | 0.9  | 1 | HC_vs_MS.NoTrt_B |
| COX6A1   | 6.36E-04 | -0.3444 | 0.113 | 0.21 | 1 | HC_vs_MS.NoTrt_B |
| NPIP4    | 6.38E-04 | 0.34719 | 0.951 | 0.98 | 1 | HC_vs_MS.NoTrt_B |
| POLR3GL  | 6.44E-04 | -0.3359 | 0.174 | 0.29 | 1 | HC_vs_MS.NoTrt_B |
| LDLRAP1  | 6.48E-04 | -0.3952 | 0.449 | 0.55 | 1 | HC_vs_MS.NoTrt_B |
| GDPGP1   | 6.50E-04 | 0.47405 | 0.926 | 0.94 | 1 | HC_vs_MS.NoTrt_B |
| HTN1     | 6.50E-04 | 0.56621 | 0.768 | 0.75 | 1 | HC_vs_MS.NoTrt_B |
| CFDP1    | 6.52E-04 | -0.7905 | 0.641 | 0.71 | 1 | HC_vs_MS.NoTrt_B |
| UFSP2    | 6.54E-04 | -0.3249 | 0.074 | 0.16 | 1 | HC_vs_MS.NoTrt_B |
| KAT2B    | 6.56E-04 | 0.40495 | 0.139 | 0.25 | 1 | HC_vs_MS.NoTrt_B |
| ATP1A4   | 6.58E-04 | 0.46628 | 0.783 | 0.75 | 1 | HC_vs_MS.NoTrt_B |
| ZNF524   | 6.58E-04 | -0.6607 | 0.057 | 0.13 | 1 | HC_vs_MS.NoTrt_B |
| TRIB1    | 6.61E-04 | -0.7557 | 0.046 | 0.11 | 1 | HC_vs_MS.NoTrt_B |
| PHLDB2   | 6.75E-04 | 0.44079 | 0.51  | 0.41 | 1 | HC_vs_MS.NoTrt_B |
| KANK2    | 6.79E-04 | 0.371   | 0.894 | 0.89 | 1 | HC_vs_MS.NoTrt_B |
| FAAP100  | 6.95E-04 | -0.5534 | 0.119 | 0.22 | 1 | HC_vs_MS.NoTrt_B |
| EIF3G    | 7.02E-04 | -0.3572 | 0.816 | 0.89 | 1 | HC_vs_MS.NoTrt_B |
| STK16    | 7.03E-04 | -0.7969 | 0.043 | 0.11 | 1 | HC_vs_MS.NoTrt_B |
| POLE     | 7.06E-04 | 0.5495  | 0.848 | 0.83 | 1 | HC_vs_MS.NoTrt_B |
| STXBP2   | 7.07E-04 | -0.2695 | 0.252 | 0.38 | 1 | HC_vs_MS.NoTrt_B |
| TAF1C    | 7.12E-04 | -0.3549 | 0.075 | 0.16 | 1 | HC_vs_MS.NoTrt_B |
| MKKS     | 7.23E-04 | -0.3945 | 0.046 | 0.11 | 1 | HC_vs_MS.NoTrt_B |
| PSMB6    | 7.37E-04 | -0.4143 | 0.571 | 0.7  | 1 | HC_vs_MS.NoTrt_B |
| GOSR2    | 7.52E-04 | -0.8144 | 0.086 | 0.17 | 1 | HC_vs_MS.NoTrt_B |
| ERLEC1   | 7.60E-04 | -0.6649 | 0.358 | 0.5  | 1 | HC_vs_MS.NoTrt_B |
| TBC1D8B  | 7.67E-04 | 0.51127 | 0.957 | 0.96 | 1 | HC_vs_MS.NoTrt_B |
| DUSP16   | 7.77E-04 | -0.3516 | 0.206 | 0.32 | 1 | HC_vs_MS.NoTrt_B |
| UTP6     | 7.80E-04 | 0.35293 | 0.87  | 0.88 | 1 | HC_vs_MS.NoTrt_B |
| MACC1    | 7.95E-04 | 0.46971 | 0.672 | 0.59 | 1 | HC_vs_MS.NoTrt_B |

|             |          |         |       |      |   |                  |
|-------------|----------|---------|-------|------|---|------------------|
| NUP37       | 8.08E-04 | -1.0157 | 0.275 | 0.4  | 1 | HC_vs_MS.NoTrt_B |
| PYGL        | 8.08E-04 | 0.37074 | 0.888 | 0.87 | 1 | HC_vs_MS.NoTrt_B |
| EIF6        | 8.15E-04 | -0.5152 | 0.125 | 0.22 | 1 | HC_vs_MS.NoTrt_B |
| NT5C        | 8.18E-04 | -0.3366 | 0.104 | 0.2  | 1 | HC_vs_MS.NoTrt_B |
| PCDHA4      | 8.23E-04 | 0.41007 | 0.904 | 0.86 | 1 | HC_vs_MS.NoTrt_B |
| MILR1       | 8.43E-04 | 0.36806 | 0.854 | 0.86 | 1 | HC_vs_MS.NoTrt_B |
| TAF1        | 8.54E-04 | 0.9269  | 0.799 | 0.8  | 1 | HC_vs_MS.NoTrt_B |
| ZNF660      | 8.58E-04 | 0.47395 | 0.564 | 0.51 | 1 | HC_vs_MS.NoTrt_B |
| RAP2C       | 8.63E-04 | -0.3749 | 0.245 | 0.36 | 1 | HC_vs_MS.NoTrt_B |
| PCSK5       | 8.65E-04 | -0.426  | 0.97  | 0.95 | 1 | HC_vs_MS.NoTrt_B |
| PRMT2       | 8.79E-04 | -0.2734 | 0.343 | 0.47 | 1 | HC_vs_MS.NoTrt_B |
| VCPKMT      | 8.85E-04 | -0.38   | 0.07  | 0.15 | 1 | HC_vs_MS.NoTrt_B |
| NIF3L1      | 8.88E-04 | -0.9727 | 0.074 | 0.15 | 1 | HC_vs_MS.NoTrt_B |
| DPPA4       | 9.01E-04 | 0.4884  | 0.852 | 0.87 | 1 | HC_vs_MS.NoTrt_B |
| IL1RAP      | 9.07E-04 | 0.29398 | 0.658 | 0.59 | 1 | HC_vs_MS.NoTrt_B |
| RP11-77H9.1 | 9.20E-04 | 0.36756 | 0.497 | 0.37 | 1 | HC_vs_MS.NoTrt_B |
| AP000304.1  | 9.35E-04 | -0.3867 | 0.197 | 0.31 | 1 | HC_vs_MS.NoTrt_B |
| SATB1       | 9.47E-04 | 0.89026 | 0.239 | 0.12 | 1 | HC_vs_MS.NoTrt_B |
| POLR2L      | 9.58E-04 | -0.6095 | 0.212 | 0.32 | 1 | HC_vs_MS.NoTrt_B |
| NEK4        | 9.61E-04 | 0.51919 | 0.767 | 0.72 | 1 | HC_vs_MS.NoTrt_B |
| TMEM159     | 9.62E-04 | 0.30172 | 0.607 | 0.49 | 1 | HC_vs_MS.NoTrt_B |
| MUL1        | 9.67E-04 | -0.6609 | 0.041 | 0.1  | 1 | HC_vs_MS.NoTrt_B |
| SCIN        | 9.71E-04 | 0.28229 | 0.88  | 0.89 | 1 | HC_vs_MS.NoTrt_B |
| CCR10       | 9.74E-04 | -0.6725 | 0.081 | 0.16 | 1 | HC_vs_MS.NoTrt_B |
| CCDC191     | 9.89E-04 | -0.4642 | 0.181 | 0.3  | 1 | HC_vs_MS.NoTrt_B |
| PHLDB1      | 0.00101  | 0.37983 | 0.942 | 0.95 | 1 | HC_vs_MS.NoTrt_B |
| RELL2       | 0.00101  | -0.4349 | 0.077 | 0.16 | 1 | HC_vs_MS.NoTrt_B |
| ZBTB8B      | 0.00102  | 0.26411 | 0.954 | 0.94 | 1 | HC_vs_MS.NoTrt_B |
| RALB        | 0.00103  | -0.274  | 0.048 | 0.11 | 1 | HC_vs_MS.NoTrt_B |
| OPTN        | 0.00103  | -0.4555 | 0.696 | 0.78 | 1 | HC_vs_MS.NoTrt_B |
| EIF2S1      | 0.00104  | -0.3727 | 0.258 | 0.36 | 1 | HC_vs_MS.NoTrt_B |
| CPT1C       | 0.00105  | 0.33963 | 0.883 | 0.92 | 1 | HC_vs_MS.NoTrt_B |
| MPV17L      | 0.00105  | 0.33476 | 0.975 | 0.98 | 1 | HC_vs_MS.NoTrt_B |
| LRRK1       | 0.00106  | 0.48286 | 0.843 | 0.81 | 1 | HC_vs_MS.NoTrt_B |
| NPFFR1      | 0.00107  | 0.27608 | 0.891 | 0.85 | 1 | HC_vs_MS.NoTrt_B |
| EIF3I       | 0.00108  | -0.7166 | 0.468 | 0.56 | 1 | HC_vs_MS.NoTrt_B |
| MALSU1      | 0.00109  | -0.4954 | 0.081 | 0.16 | 1 | HC_vs_MS.NoTrt_B |
| SHOX        | 0.0011   | 0.37302 | 0.839 | 0.78 | 1 | HC_vs_MS.NoTrt_B |
| TCF7        | 0.0011   | 0.6601  | 0.787 | 0.73 | 1 | HC_vs_MS.NoTrt_B |
| MRPL53      | 0.00111  | -0.2821 | 0.087 | 0.17 | 1 | HC_vs_MS.NoTrt_B |

|            |         |         |       |      |   |                  |
|------------|---------|---------|-------|------|---|------------------|
| LYPLA2     | 0.00112 | -0.4417 | 0.135 | 0.23 | 1 | HC_vs_MS.NoTrt_B |
| ZNF511     | 0.00112 | -0.8128 | 0.052 | 0.12 | 1 | HC_vs_MS.NoTrt_B |
| ABC7-42404 | 0.00113 | 0.26791 | 0.707 | 0.63 | 1 | HC_vs_MS.NoTrt_B |
| PEPD       | 0.00114 | -0.7777 | 0.104 | 0.19 | 1 | HC_vs_MS.NoTrt_B |
| NELFA      | 0.00114 | 0.43885 | 0.786 | 0.76 | 1 | HC_vs_MS.NoTrt_B |
| TBCA       | 0.00115 | -0.3375 | 0.213 | 0.32 | 1 | HC_vs_MS.NoTrt_B |
| SKA1       | 0.00115 | 0.33357 | 0.677 | 0.6  | 1 | HC_vs_MS.NoTrt_B |
| PLAA       | 0.00115 | -0.6719 | 0.084 | 0.16 | 1 | HC_vs_MS.NoTrt_B |
| ITPA       | 0.00116 | -0.4093 | 0.113 | 0.21 | 1 | HC_vs_MS.NoTrt_B |
| TSPYL4     | 0.00116 | -0.4855 | 0.104 | 0.2  | 1 | HC_vs_MS.NoTrt_B |
| ZNF347     | 0.00117 | 0.29006 | 0.91  | 0.9  | 1 | HC_vs_MS.NoTrt_B |
| CUTA       | 0.00117 | -0.3235 | 0.27  | 0.4  | 1 | HC_vs_MS.NoTrt_B |
| DIDO1      | 0.00117 | -0.3881 | 0.213 | 0.33 | 1 | HC_vs_MS.NoTrt_B |
| UFD1L      | 0.00119 | -0.304  | 0.761 | 0.83 | 1 | HC_vs_MS.NoTrt_B |
| NOSIP      | 0.00119 | -0.2894 | 0.484 | 0.61 | 1 | HC_vs_MS.NoTrt_B |
| IBA57      | 0.00119 | 0.88504 | 0.772 | 0.73 | 1 | HC_vs_MS.NoTrt_B |
| AFAP1L1    | 0.00119 | 0.30122 | 0.461 | 0.32 | 1 | HC_vs_MS.NoTrt_B |
| ZNF829     | 0.00121 | 0.5972  | 0.877 | 0.89 | 1 | HC_vs_MS.NoTrt_B |
| EFHC1      | 0.00121 | 0.31877 | 0.903 | 0.9  | 1 | HC_vs_MS.NoTrt_B |
| B3GAT3     | 0.00121 | -0.3989 | 0.532 | 0.62 | 1 | HC_vs_MS.NoTrt_B |
| TRIOBP     | 0.00122 | 0.48697 | 0.397 | 0.27 | 1 | HC_vs_MS.NoTrt_B |
| MTG1       | 0.00123 | -0.4097 | 0.148 | 0.25 | 1 | HC_vs_MS.NoTrt_B |
| AXL        | 0.00125 | 0.27751 | 0.668 | 0.56 | 1 | HC_vs_MS.NoTrt_B |
| RP2        | 0.00125 | 0.58734 | 0.646 | 0.62 | 1 | HC_vs_MS.NoTrt_B |
| CAMLG      | 0.00126 | -0.4122 | 0.442 | 0.56 | 1 | HC_vs_MS.NoTrt_B |
| SEN7       | 0.00129 | 0.40502 | 0.987 | 0.97 | 1 | HC_vs_MS.NoTrt_B |
| COX5A      | 0.0013  | -0.2991 | 0.206 | 0.33 | 1 | HC_vs_MS.NoTrt_B |
| ARIH1      | 0.00131 | 0.36837 | 0.964 | 0.95 | 1 | HC_vs_MS.NoTrt_B |
| GBP3       | 0.00131 | -0.5928 | 0.194 | 0.29 | 1 | HC_vs_MS.NoTrt_B |
| CD79B      | 0.00133 | -0.5335 | 0.059 | 0.13 | 1 | HC_vs_MS.NoTrt_B |
| TERF1      | 0.00133 | 0.45197 | 0.72  | 0.66 | 1 | HC_vs_MS.NoTrt_B |
| MAZ        | 0.00134 | -0.5384 | 0.138 | 0.23 | 1 | HC_vs_MS.NoTrt_B |
| PPIL3      | 0.00135 | 0.2988  | 0.796 | 0.78 | 1 | HC_vs_MS.NoTrt_B |
| BTD        | 0.00136 | -0.5562 | 0.075 | 0.15 | 1 | HC_vs_MS.NoTrt_B |
| NCF4       | 0.00136 | -0.3878 | 0.161 | 0.26 | 1 | HC_vs_MS.NoTrt_B |
| AKR7A2     | 0.00136 | -0.3663 | 0.113 | 0.21 | 1 | HC_vs_MS.NoTrt_B |
| G6PC3      | 0.00136 | 0.35804 | 0.819 | 0.77 | 1 | HC_vs_MS.NoTrt_B |
| RPA1       | 0.00137 | -0.6561 | 0.264 | 0.37 | 1 | HC_vs_MS.NoTrt_B |
| WDR61      | 0.00137 | -0.3097 | 0.13  | 0.23 | 1 | HC_vs_MS.NoTrt_B |
| HSPA4L     | 0.00139 | 0.33369 | 0.874 | 0.86 | 1 | HC_vs_MS.NoTrt_B |

|          |         |         |       |      |   |                  |
|----------|---------|---------|-------|------|---|------------------|
| ARRDC5   | 0.00139 | -0.7419 | 0.087 | 0.17 | 1 | HC_vs_MS.NoTrt_B |
| ZNF708   | 0.00141 | 0.60589 | 0.784 | 0.75 | 1 | HC_vs_MS.NoTrt_B |
| TTC12    | 0.00141 | -0.6196 | 0.097 | 0.18 | 1 | HC_vs_MS.NoTrt_B |
| STAG1    | 0.00142 | 0.33508 | 0.206 | 0.33 | 1 | HC_vs_MS.NoTrt_B |
| PDCD10   | 0.00142 | -0.2799 | 0.174 | 0.28 | 1 | HC_vs_MS.NoTrt_B |
| XPR1     | 0.00143 | -0.3805 | 0.299 | 0.41 | 1 | HC_vs_MS.NoTrt_B |
| ZNF100   | 0.00143 | 0.63291 | 0.835 | 0.82 | 1 | HC_vs_MS.NoTrt_B |
| DENND2D  | 0.00143 | 0.81997 | 0.384 | 0.28 | 1 | HC_vs_MS.NoTrt_B |
| NFS1     | 0.00144 | -0.5151 | 0.886 | 0.87 | 1 | HC_vs_MS.NoTrt_B |
| TRIM27   | 0.00144 | -0.5364 | 0.384 | 0.48 | 1 | HC_vs_MS.NoTrt_B |
| SPACA6   | 0.00146 | 0.26458 | 0.87  | 0.86 | 1 | HC_vs_MS.NoTrt_B |
| COX5B    | 0.00147 | -0.2773 | 0.759 | 0.83 | 1 | HC_vs_MS.NoTrt_B |
| SFT2D2   | 0.00148 | 0.30923 | 0.98  | 0.98 | 1 | HC_vs_MS.NoTrt_B |
| SF3B5    | 0.00151 | -0.4119 | 0.086 | 0.17 | 1 | HC_vs_MS.NoTrt_B |
| FBXL2    | 0.00151 | 0.57749 | 0.636 | 0.58 | 1 | HC_vs_MS.NoTrt_B |
| ANKLE2   | 0.00152 | 0.3595  | 0.984 | 0.99 | 1 | HC_vs_MS.NoTrt_B |
| VAV3     | 0.00153 | 0.54898 | 0.551 | 0.43 | 1 | HC_vs_MS.NoTrt_B |
| TMEM145  | 0.00153 | 0.2932  | 0.893 | 0.94 | 1 | HC_vs_MS.NoTrt_B |
| DDX24    | 0.00153 | -0.3289 | 0.51  | 0.64 | 1 | HC_vs_MS.NoTrt_B |
| SLITRK5  | 0.00153 | 0.34446 | 0.733 | 0.65 | 1 | HC_vs_MS.NoTrt_B |
| LIG1     | 0.00154 | -0.4343 | 0.13  | 0.22 | 1 | HC_vs_MS.NoTrt_B |
| AACS     | 0.00154 | 0.56014 | 0.986 | 0.98 | 1 | HC_vs_MS.NoTrt_B |
| FN3K     | 0.00155 | 0.43254 | 0.783 | 0.76 | 1 | HC_vs_MS.NoTrt_B |
| BAD      | 0.00155 | -0.4021 | 0.061 | 0.13 | 1 | HC_vs_MS.NoTrt_B |
| LYRM7    | 0.00155 | 0.54568 | 0.919 | 0.91 | 1 | HC_vs_MS.NoTrt_B |
| EMC6     | 0.00156 | -0.5078 | 0.057 | 0.12 | 1 | HC_vs_MS.NoTrt_B |
| TMEM126A | 0.00156 | -0.7606 | 0.054 | 0.12 | 1 | HC_vs_MS.NoTrt_B |
| NIM1K    | 0.00158 | 0.26014 | 0.703 | 0.62 | 1 | HC_vs_MS.NoTrt_B |
| MOCS3    | 0.00158 | 0.80225 | 0.822 | 0.81 | 1 | HC_vs_MS.NoTrt_B |
| MAP7D3   | 0.00159 | 0.62186 | 0.577 | 0.49 | 1 | HC_vs_MS.NoTrt_B |
| ERP29    | 0.00159 | -0.3414 | 0.848 | 0.88 | 1 | HC_vs_MS.NoTrt_B |
| GPI      | 0.00161 | -0.4142 | 0.886 | 0.92 | 1 | HC_vs_MS.NoTrt_B |
| TCF23    | 0.00161 | 0.2753  | 0.875 | 0.88 | 1 | HC_vs_MS.NoTrt_B |
| RCE1     | 0.00161 | -0.4445 | 0.061 | 0.13 | 1 | HC_vs_MS.NoTrt_B |
| ZNF26    | 0.00165 | 0.4159  | 0.996 | 0.99 | 1 | HC_vs_MS.NoTrt_B |
| PRF1     | 0.00167 | -0.3794 | 0.155 | 0.25 | 1 | HC_vs_MS.NoTrt_B |
| EIF3K    | 0.00169 | -0.3188 | 0.664 | 0.78 | 1 | HC_vs_MS.NoTrt_B |
| GATAD1   | 0.0017  | 0.46783 | 0.877 | 0.88 | 1 | HC_vs_MS.NoTrt_B |
| SDHA     | 0.0017  | -0.411  | 0.613 | 0.7  | 1 | HC_vs_MS.NoTrt_B |
| DBN1     | 0.00173 | 0.68761 | 0.217 | 0.12 | 1 | HC_vs_MS.NoTrt_B |

|           |         |         |       |      |   |                  |
|-----------|---------|---------|-------|------|---|------------------|
| ZNF426    | 0.00174 | 1.02474 | 0.912 | 0.9  | 1 | HC_vs_MS.NoTrt_B |
| VPS16     | 0.00178 | -0.7214 | 0.086 | 0.16 | 1 | HC_vs_MS.NoTrt_B |
| LINC01125 | 0.00179 | 0.30813 | 0.949 | 0.96 | 1 | HC_vs_MS.NoTrt_B |
| MED11     | 0.0018  | 0.45822 | 0.691 | 0.62 | 1 | HC_vs_MS.NoTrt_B |
| CBWD2     | 0.00181 | -0.2678 | 0.414 | 0.54 | 1 | HC_vs_MS.NoTrt_B |
| STRN3     | 0.00182 | 0.78988 | 0.78  | 0.71 | 1 | HC_vs_MS.NoTrt_B |
| ZNF284    | 0.00183 | -0.9565 | 0.558 | 0.67 | 1 | HC_vs_MS.NoTrt_B |
| SPAG4     | 0.00183 | -0.6323 | 0.188 | 0.3  | 1 | HC_vs_MS.NoTrt_B |
| LGMN      | 0.00184 | 0.62657 | 0.958 | 0.98 | 1 | HC_vs_MS.NoTrt_B |
| MPC2      | 0.00185 | -0.2737 | 0.428 | 0.53 | 1 | HC_vs_MS.NoTrt_B |
| PGM1      | 0.00186 | -0.9474 | 0.062 | 0.13 | 1 | HC_vs_MS.NoTrt_B |
| HERC3     | 0.00188 | -0.3949 | 0.283 | 0.38 | 1 | HC_vs_MS.NoTrt_B |
| GMPR2     | 0.00191 | -0.7047 | 0.107 | 0.19 | 1 | HC_vs_MS.NoTrt_B |
| YPEL5     | 0.00193 | -0.2745 | 0.175 | 0.28 | 1 | HC_vs_MS.NoTrt_B |
| LPXN      | 0.00196 | -0.2577 | 0.3   | 0.41 | 1 | HC_vs_MS.NoTrt_B |
| SSNA1     | 0.00202 | -0.2964 | 0.129 | 0.23 | 1 | HC_vs_MS.NoTrt_B |
| NMNAT1    | 0.00203 | 0.44078 | 0.977 | 1    | 1 | HC_vs_MS.NoTrt_B |
| SPTLC2    | 0.00205 | 0.25124 | 0.697 | 0.6  | 1 | HC_vs_MS.NoTrt_B |
| SLC8B1    | 0.00207 | -0.292  | 0.433 | 0.55 | 1 | HC_vs_MS.NoTrt_B |
| ABCA8     | 0.00208 | 0.40947 | 0.441 | 0.32 | 1 | HC_vs_MS.NoTrt_B |
| NBPF10    | 0.0021  | 1.01818 | 0.278 | 0.17 | 1 | HC_vs_MS.NoTrt_B |
| FAM172A   | 0.00211 | -0.3485 | 0.11  | 0.2  | 1 | HC_vs_MS.NoTrt_B |
| FMO3      | 0.00211 | 0.45764 | 0.567 | 0.51 | 1 | HC_vs_MS.NoTrt_B |
| FTO       | 0.00211 | 0.35961 | 0.99  | 1    | 1 | HC_vs_MS.NoTrt_B |
| NEK5      | 0.00211 | 0.38294 | 0.852 | 0.83 | 1 | HC_vs_MS.NoTrt_B |
| CACNA1D   | 0.00215 | 0.63228 | 0.661 | 0.58 | 1 | HC_vs_MS.NoTrt_B |
| PTGES3L   | 0.00216 | 0.43775 | 0.82  | 0.82 | 1 | HC_vs_MS.NoTrt_B |
| CTTNBP2NL | 0.00217 | 0.6919  | 0.441 | 0.34 | 1 | HC_vs_MS.NoTrt_B |
| SMPD1     | 0.00217 | -0.9052 | 0.055 | 0.12 | 1 | HC_vs_MS.NoTrt_B |
| ATRAID    | 0.00219 | -0.3075 | 0.183 | 0.29 | 1 | HC_vs_MS.NoTrt_B |
| VDAC1     | 0.00222 | -0.3941 | 0.719 | 0.84 | 1 | HC_vs_MS.NoTrt_B |
| TALDO1    | 0.00223 | -0.488  | 0.662 | 0.78 | 1 | HC_vs_MS.NoTrt_B |
| VTI1B     | 0.00228 | -0.3706 | 0.217 | 0.32 | 1 | HC_vs_MS.NoTrt_B |
| STMND1    | 0.00229 | 0.32297 | 0.826 | 0.78 | 1 | HC_vs_MS.NoTrt_B |
| GSTO1     | 0.0023  | -0.3983 | 0.11  | 0.2  | 1 | HC_vs_MS.NoTrt_B |
| ST7       | 0.0023  | -1.5295 | 0.045 | 0.1  | 1 | HC_vs_MS.NoTrt_B |
| ERMARD    | 0.00233 | -0.6232 | 0.071 | 0.14 | 1 | HC_vs_MS.NoTrt_B |
| SPP2      | 0.00236 | 0.62904 | 0.691 | 0.68 | 1 | HC_vs_MS.NoTrt_B |
| HADHA     | 0.00236 | -0.3257 | 0.509 | 0.63 | 1 | HC_vs_MS.NoTrt_B |
| ZNF506    | 0.00237 | 0.29145 | 0.987 | 1    | 1 | HC_vs_MS.NoTrt_B |

|          |         |         |       |      |   |                  |
|----------|---------|---------|-------|------|---|------------------|
| EIF4E    | 0.00243 | 0.29837 | 0.988 | 1    | 1 | HC_vs_MS.NoTrt_B |
| TBC1D30  | 0.00244 | 0.25197 | 0.887 | 0.85 | 1 | HC_vs_MS.NoTrt_B |
| TOMM6    | 0.00246 | -0.2917 | 0.199 | 0.31 | 1 | HC_vs_MS.NoTrt_B |
| PCBP4    | 0.00249 | -1.1149 | 0.049 | 0.11 | 1 | HC_vs_MS.NoTrt_B |
| CASP4    | 0.00249 | -0.3833 | 0.336 | 0.45 | 1 | HC_vs_MS.NoTrt_B |
| APH1A    | 0.0025  | -0.4582 | 0.181 | 0.28 | 1 | HC_vs_MS.NoTrt_B |
| DOK1     | 0.0025  | -0.6994 | 0.045 | 0.1  | 1 | HC_vs_MS.NoTrt_B |
| OS9      | 0.00252 | -0.3433 | 0.226 | 0.34 | 1 | HC_vs_MS.NoTrt_B |
| PHF6     | 0.00253 | 0.83269 | 0.667 | 0.59 | 1 | HC_vs_MS.NoTrt_B |
| FAM32A   | 0.00254 | -0.5253 | 0.436 | 0.53 | 1 | HC_vs_MS.NoTrt_B |
| HNRNPH2  | 0.00254 | -0.5902 | 0.155 | 0.24 | 1 | HC_vs_MS.NoTrt_B |
| PHLPP2   | 0.00256 | 0.86704 | 0.8   | 0.76 | 1 | HC_vs_MS.NoTrt_B |
| HPF1     | 0.00257 | -0.4136 | 0.078 | 0.15 | 1 | HC_vs_MS.NoTrt_B |
| CTNS     | 0.00257 | -1.1094 | 0.106 | 0.18 | 1 | HC_vs_MS.NoTrt_B |
| CREB3    | 0.00258 | -0.8515 | 0.052 | 0.11 | 1 | HC_vs_MS.NoTrt_B |
| KDM4A    | 0.00259 | -0.3158 | 0.088 | 0.17 | 1 | HC_vs_MS.NoTrt_B |
| MOCOS    | 0.00261 | 0.36521 | 0.625 | 0.53 | 1 | HC_vs_MS.NoTrt_B |
| LY6G5C   | 0.00261 | -0.2976 | 0.594 | 0.5  | 1 | HC_vs_MS.NoTrt_B |
| ALKBH7   | 0.00262 | -0.4838 | 0.106 | 0.19 | 1 | HC_vs_MS.NoTrt_B |
| DAGLB    | 0.00262 | 0.63929 | 0.828 | 0.84 | 1 | HC_vs_MS.NoTrt_B |
| TM4SF18  | 0.00262 | 0.33289 | 0.267 | 0.16 | 1 | HC_vs_MS.NoTrt_B |
| CLN5     | 0.00263 | 0.31667 | 0.962 | 0.97 | 1 | HC_vs_MS.NoTrt_B |
| TRIP12   | 0.00267 | -0.2854 | 0.458 | 0.58 | 1 | HC_vs_MS.NoTrt_B |
| ZNF329   | 0.00267 | 0.37947 | 0.716 | 0.68 | 1 | HC_vs_MS.NoTrt_B |
| C11orf98 | 0.00268 | -0.7188 | 0.103 | 0.18 | 1 | HC_vs_MS.NoTrt_B |
| TM7SF3   | 0.0027  | 0.42201 | 0.935 | 0.96 | 1 | HC_vs_MS.NoTrt_B |
| MRPL21   | 0.00271 | -0.491  | 0.087 | 0.16 | 1 | HC_vs_MS.NoTrt_B |
| EEF2KMT  | 0.00273 | -0.6001 | 0.057 | 0.12 | 1 | HC_vs_MS.NoTrt_B |
| ATP6V0D2 | 0.00273 | 0.30954 | 0.778 | 0.74 | 1 | HC_vs_MS.NoTrt_B |
| ZKSCAN1  | 0.00276 | 0.30469 | 0.939 | 0.92 | 1 | HC_vs_MS.NoTrt_B |
| SULT1A4  | 0.00277 | -0.7241 | 0.21  | 0.3  | 1 | HC_vs_MS.NoTrt_B |
| BCL2L1   | 0.00277 | -0.3053 | 0.123 | 0.21 | 1 | HC_vs_MS.NoTrt_B |
| ZNF554   | 0.00277 | 0.2662  | 0.951 | 0.96 | 1 | HC_vs_MS.NoTrt_B |
| ZNF844   | 0.00279 | 0.30405 | 0.904 | 0.89 | 1 | HC_vs_MS.NoTrt_B |
| GSTT1    | 0.00281 | 0.38841 | 0.723 | 0.64 | 1 | HC_vs_MS.NoTrt_B |
| FSIP2    | 0.00282 | 0.40775 | 0.793 | 0.76 | 1 | HC_vs_MS.NoTrt_B |
| C15orf59 | 0.00282 | 0.3703  | 0.654 | 0.6  | 1 | HC_vs_MS.NoTrt_B |
| PTRHD1   | 0.00284 | -0.5672 | 0.22  | 0.32 | 1 | HC_vs_MS.NoTrt_B |
| HSD17B10 | 0.00284 | -0.4644 | 0.09  | 0.17 | 1 | HC_vs_MS.NoTrt_B |
| DPP8     | 0.0029  | -0.2557 | 0.357 | 0.47 | 1 | HC_vs_MS.NoTrt_B |

|          |         |         |       |      |   |                  |
|----------|---------|---------|-------|------|---|------------------|
| C1orf186 | 0.00295 | 0.4829  | 0.614 | 0.57 | 1 | HC_vs_MS.NoTrt_B |
| LAMTOR4  | 0.00295 | -0.4185 | 0.441 | 0.54 | 1 | HC_vs_MS.NoTrt_B |
| HLA-DPB1 | 0.00296 | -0.591  | 0.443 | 0.53 | 1 | HC_vs_MS.NoTrt_B |
| HACD2    | 0.00299 | 0.35055 | 0.939 | 0.97 | 1 | HC_vs_MS.NoTrt_B |
| MAP4K3   | 0.003   | -0.7823 | 0.049 | 0.11 | 1 | HC_vs_MS.NoTrt_B |
| POLR2J   | 0.00302 | -0.379  | 0.152 | 0.24 | 1 | HC_vs_MS.NoTrt_B |
| FEM1A    | 0.00303 | 0.2686  | 0.933 | 0.92 | 1 | HC_vs_MS.NoTrt_B |
| SRI      | 0.00303 | -0.3002 | 0.367 | 0.47 | 1 | HC_vs_MS.NoTrt_B |
| BCAS2    | 0.00305 | -0.3769 | 0.162 | 0.25 | 1 | HC_vs_MS.NoTrt_B |
| THOC7    | 0.00306 | -0.3506 | 0.145 | 0.24 | 1 | HC_vs_MS.NoTrt_B |
| RAB8A    | 0.00306 | -0.4518 | 0.507 | 0.6  | 1 | HC_vs_MS.NoTrt_B |
| CCL5     | 0.00307 | 0.29928 | 0.89  | 0.88 | 1 | HC_vs_MS.NoTrt_B |
| PPP5D1   | 0.00309 | 0.58477 | 0.729 | 0.7  | 1 | HC_vs_MS.NoTrt_B |
| FAM127A  | 0.00312 | -0.7011 | 0.065 | 0.13 | 1 | HC_vs_MS.NoTrt_B |
| CDK7     | 0.00312 | -0.3417 | 0.135 | 0.22 | 1 | HC_vs_MS.NoTrt_B |
| C1orf109 | 0.00321 | 0.26901 | 0.868 | 0.83 | 1 | HC_vs_MS.NoTrt_B |
| PLPP2    | 0.00321 | 0.28002 | 0.891 | 0.87 | 1 | HC_vs_MS.NoTrt_B |
| PROM2    | 0.00324 | 0.50063 | 0.706 | 0.67 | 1 | HC_vs_MS.NoTrt_B |
| SLC5A5   | 0.00326 | 1.20816 | 0.455 | 0.36 | 1 | HC_vs_MS.NoTrt_B |
| EXOC4    | 0.00326 | -0.2871 | 0.564 | 0.67 | 1 | HC_vs_MS.NoTrt_B |
| SDHAF3   | 0.00326 | 0.29117 | 0.045 | 0.1  | 1 | HC_vs_MS.NoTrt_B |
| SLC38A6  | 0.00333 | 0.31152 | 0.643 | 0.61 | 1 | HC_vs_MS.NoTrt_B |
| FYCO1    | 0.00333 | -0.4126 | 0.1   | 0.18 | 1 | HC_vs_MS.NoTrt_B |
| WDR62    | 0.00334 | 0.38711 | 0.884 | 0.88 | 1 | HC_vs_MS.NoTrt_B |
| LILRA2   | 0.00334 | 0.27367 | 0.787 | 0.73 | 1 | HC_vs_MS.NoTrt_B |
| COG5     | 0.00335 | 0.60595 | 0.199 | 0.3  | 1 | HC_vs_MS.NoTrt_B |
| SCGB3A2  | 0.00335 | 0.53742 | 0.28  | 0.17 | 1 | HC_vs_MS.NoTrt_B |
| NHP2     | 0.00335 | -0.3395 | 0.172 | 0.27 | 1 | HC_vs_MS.NoTrt_B |
| SNRPA    | 0.00336 | -0.2523 | 0.288 | 0.4  | 1 | HC_vs_MS.NoTrt_B |
| SSX5     | 0.00337 | 0.5115  | 0.199 | 0.11 | 1 | HC_vs_MS.NoTrt_B |
| KCNN3    | 0.00337 | 0.25336 | 0.412 | 0.32 | 1 | HC_vs_MS.NoTrt_B |
| COL1A2   | 0.00337 | 0.35764 | 0.417 | 0.32 | 1 | HC_vs_MS.NoTrt_B |
| AP5Z1    | 0.00341 | -0.7006 | 0.143 | 0.23 | 1 | HC_vs_MS.NoTrt_B |
| NDUFAB1  | 0.00343 | -0.2996 | 0.17  | 0.27 | 1 | HC_vs_MS.NoTrt_B |
| KCNAB3   | 0.00343 | -0.383  | 0.343 | 0.47 | 1 | HC_vs_MS.NoTrt_B |
| KCNJ15   | 0.00346 | 0.59095 | 0.588 | 0.52 | 1 | HC_vs_MS.NoTrt_B |
| ANKS3    | 0.00347 | -0.288  | 0.746 | 0.7  | 1 | HC_vs_MS.NoTrt_B |
| NAPRT    | 0.00347 | -0.391  | 0.138 | 0.23 | 1 | HC_vs_MS.NoTrt_B |
| CCDC12   | 0.00347 | -0.4047 | 0.281 | 0.4  | 1 | HC_vs_MS.NoTrt_B |
| POP4     | 0.00351 | -0.5625 | 0.101 | 0.18 | 1 | HC_vs_MS.NoTrt_B |

|         |         |         |       |      |   |                  |
|---------|---------|---------|-------|------|---|------------------|
| PMVK    | 0.00354 | -0.3604 | 0.096 | 0.17 | 1 | HC_vs_MS.NoTrt_B |
| DDX39A  | 0.00354 | -0.3116 | 0.268 | 0.38 | 1 | HC_vs_MS.NoTrt_B |
| SYMPK   | 0.00355 | 0.2833  | 0.887 | 0.89 | 1 | HC_vs_MS.NoTrt_B |
| MANSC1  | 0.00358 | 0.26192 | 0.916 | 0.92 | 1 | HC_vs_MS.NoTrt_B |
| CAMTA1  | 0.0036  | -0.4694 | 0.116 | 0.2  | 1 | HC_vs_MS.NoTrt_B |
| PLAG1   | 0.0036  | 1.06119 | 0.358 | 0.25 | 1 | HC_vs_MS.NoTrt_B |
| TERF2   | 0.00364 | 0.45044 | 0.864 | 0.84 | 1 | HC_vs_MS.NoTrt_B |
| COMTD1  | 0.00364 | -0.6531 | 0.062 | 0.12 | 1 | HC_vs_MS.NoTrt_B |
| HECW2   | 0.00365 | 0.4915  | 0.403 | 0.3  | 1 | HC_vs_MS.NoTrt_B |
| HTRA4   | 0.00367 | 0.47611 | 0.455 | 0.35 | 1 | HC_vs_MS.NoTrt_B |
| STIM2   | 0.00369 | -0.2946 | 0.093 | 0.17 | 1 | HC_vs_MS.NoTrt_B |
| CTRL    | 0.00373 | -0.679  | 0.062 | 0.12 | 1 | HC_vs_MS.NoTrt_B |
| YPEL3   | 0.00373 | -0.5075 | 0.235 | 0.32 | 1 | HC_vs_MS.NoTrt_B |
| SLC35A1 | 0.00374 | -0.255  | 0.081 | 0.15 | 1 | HC_vs_MS.NoTrt_B |
| PGK1    | 0.00377 | -0.3059 | 0.577 | 0.66 | 1 | HC_vs_MS.NoTrt_B |
| LILRA5  | 0.00379 | 0.40421 | 0.728 | 0.67 | 1 | HC_vs_MS.NoTrt_B |
| C3      | 0.00379 | 0.30361 | 0.933 | 0.96 | 1 | HC_vs_MS.NoTrt_B |
| ZFYVE16 | 0.0038  | 0.65072 | 0.883 | 0.88 | 1 | HC_vs_MS.NoTrt_B |
| FLT1    | 0.0038  | 0.26988 | 0.683 | 0.59 | 1 | HC_vs_MS.NoTrt_B |
| MITD1   | 0.00381 | 0.45628 | 0.943 | 0.96 | 1 | HC_vs_MS.NoTrt_B |
| ATP2A2  | 0.00386 | 1.26448 | 0.694 | 0.67 | 1 | HC_vs_MS.NoTrt_B |
| USF1    | 0.0039  | -2.0201 | 0.146 | 0.22 | 1 | HC_vs_MS.NoTrt_B |
| SRRM2   | 0.00391 | 0.67376 | 0.742 | 0.72 | 1 | HC_vs_MS.NoTrt_B |
| NEUROD2 | 0.00393 | 1.05532 | 0.188 | 0.1  | 1 | HC_vs_MS.NoTrt_B |
| PHB     | 0.00399 | -0.5129 | 0.123 | 0.21 | 1 | HC_vs_MS.NoTrt_B |
| HOOK2   | 0.00399 | 0.5358  | 0.952 | 0.96 | 1 | HC_vs_MS.NoTrt_B |
| NELFE   | 0.00403 | -0.3979 | 0.114 | 0.2  | 1 | HC_vs_MS.NoTrt_B |
| ACAD9   | 0.00404 | -1.0218 | 0.248 | 0.34 | 1 | HC_vs_MS.NoTrt_B |
| ZNF492  | 0.00404 | 0.50093 | 0.49  | 0.4  | 1 | HC_vs_MS.NoTrt_B |
| ITGB3BP | 0.00405 | 0.47102 | 0.784 | 0.79 | 1 | HC_vs_MS.NoTrt_B |
| CHRNA5  | 0.00407 | 0.39011 | 0.52  | 0.46 | 1 | HC_vs_MS.NoTrt_B |
| MAGED2  | 0.00409 | -0.4235 | 0.138 | 0.22 | 1 | HC_vs_MS.NoTrt_B |
| RANBP1  | 0.0041  | -0.5548 | 0.142 | 0.23 | 1 | HC_vs_MS.NoTrt_B |
| EZH2    | 0.00414 | -0.5369 | 0.099 | 0.17 | 1 | HC_vs_MS.NoTrt_B |
| PNKD    | 0.00418 | -0.4883 | 0.099 | 0.17 | 1 | HC_vs_MS.NoTrt_B |
| KBTBD4  | 0.0042  | -0.6442 | 0.051 | 0.11 | 1 | HC_vs_MS.NoTrt_B |
| SZT2    | 0.00426 | 0.30632 | 0.849 | 0.82 | 1 | HC_vs_MS.NoTrt_B |
| BLVRA   | 0.00428 | -0.6134 | 0.103 | 0.18 | 1 | HC_vs_MS.NoTrt_B |
| FKBP3   | 0.00428 | 0.29045 | 0.268 | 0.38 | 1 | HC_vs_MS.NoTrt_B |
| ARMC1   | 0.00431 | -0.5833 | 0.083 | 0.15 | 1 | HC_vs_MS.NoTrt_B |



|            |         |         |       |      |   |                  |
|------------|---------|---------|-------|------|---|------------------|
| ARF5       | 0.00434 | -0.3772 | 0.196 | 0.29 | 1 | HC_vs_MS.NoTrt_B |
| SLC25A11   | 0.00436 | -0.2792 | 0.104 | 0.18 | 1 | HC_vs_MS.NoTrt_B |
| LBHD1      | 0.00436 | 1.95219 | 0.477 | 0.39 | 1 | HC_vs_MS.NoTrt_B |
| PARK7      | 0.00437 | -0.2876 | 0.714 | 0.78 | 1 | HC_vs_MS.NoTrt_B |
| PCDHB1     | 0.0044  | 0.33225 | 0.778 | 0.79 | 1 | HC_vs_MS.NoTrt_B |
| ARPC1B     | 0.00444 | -0.2924 | 0.928 | 0.98 | 1 | HC_vs_MS.NoTrt_B |
| PPP1R11    | 0.00445 | -0.3516 | 0.13  | 0.22 | 1 | HC_vs_MS.NoTrt_B |
| DERL2      | 0.00445 | 0.27103 | 0.268 | 0.37 | 1 | HC_vs_MS.NoTrt_B |
| RP11-577H5 | 0.00447 | -0.8579 | 0.075 | 0.14 | 1 | HC_vs_MS.NoTrt_B |
| UGGT2      | 0.00448 | 0.47809 | 0.803 | 0.78 | 1 | HC_vs_MS.NoTrt_B |
| FKBP15     | 0.00449 | -0.4966 | 0.07  | 0.14 | 1 | HC_vs_MS.NoTrt_B |
| SRD5A1     | 0.0045  | -0.2527 | 0.701 | 0.68 | 1 | HC_vs_MS.NoTrt_B |
| GABRP      | 0.00452 | 0.64436 | 0.323 | 0.22 | 1 | HC_vs_MS.NoTrt_B |
| QPRT       | 0.00454 | 0.35387 | 0.92  | 0.92 | 1 | HC_vs_MS.NoTrt_B |
| GPR85      | 0.00459 | 0.51441 | 0.388 | 0.28 | 1 | HC_vs_MS.NoTrt_B |
| AHSA2      | 0.00462 | 0.33148 | 0.219 | 0.32 | 1 | HC_vs_MS.NoTrt_B |
| SPICE1     | 0.00462 | -0.5376 | 0.235 | 0.35 | 1 | HC_vs_MS.NoTrt_B |
| MAP3K1     | 0.00476 | 0.34287 | 0.464 | 0.64 | 1 | HC_vs_MS.NoTrt_B |
| FKBP8      | 0.00477 | 0.53215 | 0.196 | 0.31 | 1 | HC_vs_MS.NoTrt_B |
| ETHE1      | 0.00477 | -0.4172 | 0.055 | 0.11 | 1 | HC_vs_MS.NoTrt_B |
| GABARAPL2  | 0.00478 | -0.4537 | 0.443 | 0.54 | 1 | HC_vs_MS.NoTrt_B |
| H6PD       | 0.0048  | 0.86177 | 0.793 | 0.83 | 1 | HC_vs_MS.NoTrt_B |
| SCN7A      | 0.00481 | 0.46695 | 0.522 | 0.44 | 1 | HC_vs_MS.NoTrt_B |
| TMEM147    | 0.00482 | -0.4338 | 0.11  | 0.19 | 1 | HC_vs_MS.NoTrt_B |
| NIPA2      | 0.00485 | -0.5552 | 0.091 | 0.16 | 1 | HC_vs_MS.NoTrt_B |
| UQCRH      | 0.0049  | -0.2848 | 0.514 | 0.62 | 1 | HC_vs_MS.NoTrt_B |
| SLC16A12   | 0.00491 | 0.48321 | 0.397 | 0.31 | 1 | HC_vs_MS.NoTrt_B |
| RGL4       | 0.00492 | -0.3814 | 0.194 | 0.29 | 1 | HC_vs_MS.NoTrt_B |
| KATNA1     | 0.00492 | -0.8265 | 0.064 | 0.12 | 1 | HC_vs_MS.NoTrt_B |
| BRF1       | 0.00494 | 0.58827 | 0.565 | 0.47 | 1 | HC_vs_MS.NoTrt_B |
| SQSTM1     | 0.005   | -0.3303 | 0.81  | 0.84 | 1 | HC_vs_MS.NoTrt_B |
| PTPRC      | 0.005   | 0.37744 | 0.962 | 0.98 | 1 | HC_vs_MS.NoTrt_B |
| DYNC1H1    | 0.0051  | 0.37969 | 0.938 | 0.96 | 1 | HC_vs_MS.NoTrt_B |
| BEX2       | 0.00516 | -0.5285 | 0.067 | 0.13 | 1 | HC_vs_MS.NoTrt_B |
| ST3GAL6    | 0.00519 | 0.70621 | 0.31  | 0.23 | 1 | HC_vs_MS.NoTrt_B |
| CEP19      | 0.00521 | 0.9677  | 0.643 | 0.58 | 1 | HC_vs_MS.NoTrt_B |
| MTMR9      | 0.00525 | -0.3529 | 0.274 | 0.38 | 1 | HC_vs_MS.NoTrt_B |
| EEFSEC     | 0.00527 | -0.4033 | 0.083 | 0.15 | 1 | HC_vs_MS.NoTrt_B |
| SLC43A1    | 0.00531 | -0.7066 | 0.075 | 0.14 | 1 | HC_vs_MS.NoTrt_B |
| DPP6       | 0.00535 | 0.34768 | 0.477 | 0.39 | 1 | HC_vs_MS.NoTrt_B |

|            |         |         |       |      |   |                  |
|------------|---------|---------|-------|------|---|------------------|
| ASNSD1     | 0.00537 | -0.5806 | 0.109 | 0.18 | 1 | HC_vs_MS.NoTrt_B |
| TMEM109    | 0.00541 | -0.2913 | 0.141 | 0.23 | 1 | HC_vs_MS.NoTrt_B |
| UCHL3      | 0.00542 | -0.2815 | 0.104 | 0.18 | 1 | HC_vs_MS.NoTrt_B |
| PGAM1      | 0.00544 | -0.2654 | 0.206 | 0.3  | 1 | HC_vs_MS.NoTrt_B |
| LRR36      | 0.00545 | 0.30066 | 0.836 | 0.82 | 1 | HC_vs_MS.NoTrt_B |
| KDM2A      | 0.00548 | 0.72291 | 0.907 | 0.88 | 1 | HC_vs_MS.NoTrt_B |
| NLRP12     | 0.00549 | 0.37316 | 0.738 | 0.71 | 1 | HC_vs_MS.NoTrt_B |
| PIGR       | 0.00553 | 0.37085 | 0.557 | 0.47 | 1 | HC_vs_MS.NoTrt_B |
| DACT3      | 0.00559 | 0.25139 | 0.955 | 0.96 | 1 | HC_vs_MS.NoTrt_B |
| TMEM161A   | 0.00564 | -0.6754 | 0.135 | 0.22 | 1 | HC_vs_MS.NoTrt_B |
| FAM131A    | 0.0057  | 0.7976  | 0.806 | 0.76 | 1 | HC_vs_MS.NoTrt_B |
| MRPL39     | 0.00572 | -0.5623 | 0.084 | 0.15 | 1 | HC_vs_MS.NoTrt_B |
| AC025335.1 | 0.00574 | 0.65455 | 0.613 | 0.51 | 1 | HC_vs_MS.NoTrt_B |
| PIP4K2C    | 0.00576 | -0.8039 | 0.107 | 0.18 | 1 | HC_vs_MS.NoTrt_B |
| SGO2       | 0.00577 | 0.44873 | 0.791 | 0.8  | 1 | HC_vs_MS.NoTrt_B |
| ASMTL      | 0.00586 | -0.52   | 0.068 | 0.13 | 1 | HC_vs_MS.NoTrt_B |
| C14orf2    | 0.00586 | -0.2511 | 0.833 | 0.88 | 1 | HC_vs_MS.NoTrt_B |
| C17orf89   | 0.00588 | -0.2844 | 0.071 | 0.14 | 1 | HC_vs_MS.NoTrt_B |
| TMEM120A   | 0.00593 | -0.2826 | 0.096 | 0.17 | 1 | HC_vs_MS.NoTrt_B |
| RP11-437B1 | 0.00596 | 0.65109 | 0.574 | 0.5  | 1 | HC_vs_MS.NoTrt_B |
| SHMT1      | 0.00598 | -0.8469 | 0.367 | 0.48 | 1 | HC_vs_MS.NoTrt_B |
| AATF       | 0.00601 | -0.5244 | 0.165 | 0.25 | 1 | HC_vs_MS.NoTrt_B |
| TECRL      | 0.00601 | 0.48128 | 0.217 | 0.13 | 1 | HC_vs_MS.NoTrt_B |
| RUSC1      | 0.00603 | -1.0978 | 0.049 | 0.1  | 1 | HC_vs_MS.NoTrt_B |
| CD40LG     | 0.00603 | 1.18053 | 0.22  | 0.14 | 1 | HC_vs_MS.NoTrt_B |
| TBCB       | 0.00603 | -0.3506 | 0.645 | 0.71 | 1 | HC_vs_MS.NoTrt_B |
| MRPL54     | 0.00604 | -0.4188 | 0.087 | 0.16 | 1 | HC_vs_MS.NoTrt_B |
| TOP3B      | 0.00607 | -0.2881 | 0.133 | 0.22 | 1 | HC_vs_MS.NoTrt_B |
| ICA1       | 0.00607 | 1.03903 | 0.596 | 0.54 | 1 | HC_vs_MS.NoTrt_B |
| TSEN2      | 0.00609 | 0.52654 | 0.881 | 0.88 | 1 | HC_vs_MS.NoTrt_B |
| TTC31      | 0.00614 | -0.6069 | 0.206 | 0.29 | 1 | HC_vs_MS.NoTrt_B |
| SLC30A5    | 0.00615 | 0.40913 | 0.777 | 0.71 | 1 | HC_vs_MS.NoTrt_B |
| ADCY2      | 0.00615 | 0.35312 | 0.717 | 0.68 | 1 | HC_vs_MS.NoTrt_B |
| METTL8     | 0.00616 | 0.30703 | 0.916 | 0.94 | 1 | HC_vs_MS.NoTrt_B |
| RAB21      | 0.00623 | 0.49039 | 0.964 | 0.97 | 1 | HC_vs_MS.NoTrt_B |
| POGZ       | 0.00625 | 0.67181 | 0.822 | 0.8  | 1 | HC_vs_MS.NoTrt_B |
| C1orf216   | 0.00627 | -0.4039 | 0.81  | 0.8  | 1 | HC_vs_MS.NoTrt_B |
| METTL26    | 0.00628 | -0.2644 | 0.187 | 0.28 | 1 | HC_vs_MS.NoTrt_B |
| GFOD2      | 0.00629 | 0.66633 | 0.886 | 0.9  | 1 | HC_vs_MS.NoTrt_B |
| HSPA1A     | 0.00631 | -0.3184 | 0.122 | 0.2  | 1 | HC_vs_MS.NoTrt_B |

|           |         |         |       |      |   |                  |
|-----------|---------|---------|-------|------|---|------------------|
| TMEM223   | 0.00632 | -0.472  | 0.133 | 0.21 | 1 | HC_vs_MS.NoTrt_B |
| CHD7      | 0.00636 | 2.01048 | 0.554 | 0.51 | 1 | HC_vs_MS.NoTrt_B |
| SNRPB     | 0.00643 | -0.2524 | 0.188 | 0.28 | 1 | HC_vs_MS.NoTrt_B |
| STARD10   | 0.00644 | 0.34172 | 0.825 | 0.81 | 1 | HC_vs_MS.NoTrt_B |
| ZNF821    | 0.00645 | -0.6753 | 0.049 | 0.1  | 1 | HC_vs_MS.NoTrt_B |
| CKAP2L    | 0.00648 | 0.50712 | 0.49  | 0.41 | 1 | HC_vs_MS.NoTrt_B |
| TNFAIP8L2 | 0.00662 | -0.4233 | 0.084 | 0.15 | 1 | HC_vs_MS.NoTrt_B |
| C1orf159  | 0.00668 | -0.4078 | 0.114 | 0.19 | 1 | HC_vs_MS.NoTrt_B |
| SKA2      | 0.00674 | 0.25042 | 0.551 | 0.65 | 1 | HC_vs_MS.NoTrt_B |
| ANXA3     | 0.00678 | 0.30808 | 0.486 | 0.38 | 1 | HC_vs_MS.NoTrt_B |
| CACNB4    | 0.00678 | 0.47433 | 0.858 | 0.9  | 1 | HC_vs_MS.NoTrt_B |
| PRDX6     | 0.0068  | -0.2835 | 0.157 | 0.24 | 1 | HC_vs_MS.NoTrt_B |
| FAM135B   | 0.00687 | 0.30778 | 0.291 | 0.2  | 1 | HC_vs_MS.NoTrt_B |
| ATXN2     | 0.00687 | 0.42737 | 0.88  | 0.85 | 1 | HC_vs_MS.NoTrt_B |
| DNAJA2    | 0.00689 | -0.4122 | 0.367 | 0.45 | 1 | HC_vs_MS.NoTrt_B |
| FAM83F    | 0.0069  | 0.32123 | 0.87  | 0.85 | 1 | HC_vs_MS.NoTrt_B |
| HAUS3     | 0.00693 | 0.50475 | 0.822 | 0.85 | 1 | HC_vs_MS.NoTrt_B |
| DNAL1     | 0.00695 | 0.37931 | 0.919 | 0.94 | 1 | HC_vs_MS.NoTrt_B |
| CPQ       | 0.00703 | -0.95   | 0.357 | 0.47 | 1 | HC_vs_MS.NoTrt_B |
| MRPL24    | 0.00704 | -0.5267 | 0.081 | 0.15 | 1 | HC_vs_MS.NoTrt_B |
| EPB41L4A  | 0.00712 | -0.3803 | 0.561 | 0.49 | 1 | HC_vs_MS.NoTrt_B |
| C12orf57  | 0.00712 | -0.516  | 0.349 | 0.45 | 1 | HC_vs_MS.NoTrt_B |
| LRRC74B   | 0.00713 | 0.36778 | 0.748 | 0.71 | 1 | HC_vs_MS.NoTrt_B |
| RASGRP1   | 0.00718 | -0.2722 | 0.354 | 0.45 | 1 | HC_vs_MS.NoTrt_B |
| POLDIP3   | 0.00728 | -0.3626 | 0.119 | 0.2  | 1 | HC_vs_MS.NoTrt_B |
| CCT6B     | 0.00729 | 0.66192 | 0.255 | 0.16 | 1 | HC_vs_MS.NoTrt_B |
| IGFBPL1   | 0.00737 | 0.35129 | 0.562 | 0.5  | 1 | HC_vs_MS.NoTrt_B |
| BTBD9     | 0.00738 | 0.57877 | 0.552 | 0.46 | 1 | HC_vs_MS.NoTrt_B |
| TRAT1     | 0.0074  | 1.10139 | 0.249 | 0.17 | 1 | HC_vs_MS.NoTrt_B |
| AGBL3     | 0.00742 | -0.5023 | 0.248 | 0.34 | 1 | HC_vs_MS.NoTrt_B |
| ZYG11B    | 0.00749 | 0.76995 | 0.704 | 0.62 | 1 | HC_vs_MS.NoTrt_B |
| PPP1R7    | 0.0075  | -0.3385 | 0.152 | 0.23 | 1 | HC_vs_MS.NoTrt_B |
| BRPF1     | 0.0075  | 0.76125 | 0.057 | 0.11 | 1 | HC_vs_MS.NoTrt_B |
| CMTR1     | 0.00751 | -0.3204 | 0.159 | 0.24 | 1 | HC_vs_MS.NoTrt_B |
| STRA13    | 0.00761 | -0.5848 | 0.09  | 0.16 | 1 | HC_vs_MS.NoTrt_B |
| SPDYE2B   | 0.00764 | 1.15135 | 0.335 | 0.27 | 1 | HC_vs_MS.NoTrt_B |
| WDR74     | 0.00765 | 0.37801 | 0.596 | 0.48 | 1 | HC_vs_MS.NoTrt_B |
| R3HCC1    | 0.00765 | -0.2514 | 0.088 | 0.16 | 1 | HC_vs_MS.NoTrt_B |
| POM121    | 0.00767 | 0.25148 | 0.397 | 0.52 | 1 | HC_vs_MS.NoTrt_B |
| FGF22     | 0.00773 | 0.30205 | 0.37  | 0.29 | 1 | HC_vs_MS.NoTrt_B |

|         |         |         |       |      |   |                  |
|---------|---------|---------|-------|------|---|------------------|
| RBMS1   | 0.00777 | 0.58038 | 0.665 | 0.61 | 1 | HC_vs_MS.NoTrt_B |
| SPIRE2  | 0.00778 | 0.37401 | 0.917 | 0.92 | 1 | HC_vs_MS.NoTrt_B |
| CHEK1   | 0.00778 | 0.74355 | 0.767 | 0.77 | 1 | HC_vs_MS.NoTrt_B |
| TLR10   | 0.0078  | 0.26379 | 0.404 | 0.3  | 1 | HC_vs_MS.NoTrt_B |
| TOR1B   | 0.00781 | 1.4084  | 0.2   | 0.11 | 1 | HC_vs_MS.NoTrt_B |
| DAPK3   | 0.00782 | -0.2724 | 0.061 | 0.12 | 1 | HC_vs_MS.NoTrt_B |
| ADA     | 0.00784 | -0.4997 | 0.065 | 0.12 | 1 | HC_vs_MS.NoTrt_B |
| TNRC6B  | 0.00787 | 0.50179 | 0.951 | 1    | 1 | HC_vs_MS.NoTrt_B |
| ZNF316  | 0.00791 | 0.53659 | 0.461 | 0.38 | 1 | HC_vs_MS.NoTrt_B |
| SNTB2   | 0.00792 | 0.50339 | 0.774 | 0.78 | 1 | HC_vs_MS.NoTrt_B |
| MIS18A  | 0.00794 | -0.3355 | 0.051 | 0.1  | 1 | HC_vs_MS.NoTrt_B |
| PLPP5   | 0.00796 | 0.69604 | 0.848 | 0.84 | 1 | HC_vs_MS.NoTrt_B |
| CBFA2T2 | 0.008   | 0.33636 | 0.92  | 0.95 | 1 | HC_vs_MS.NoTrt_B |
| CLDN11  | 0.00802 | 0.59103 | 0.559 | 0.47 | 1 | HC_vs_MS.NoTrt_B |
| SLITRK2 | 0.00806 | 0.42236 | 0.335 | 0.25 | 1 | HC_vs_MS.NoTrt_B |
| SNIP1   | 0.0081  | 0.41407 | 0.659 | 0.6  | 1 | HC_vs_MS.NoTrt_B |
| NSA2    | 0.0081  | -0.4256 | 0.317 | 0.41 | 1 | HC_vs_MS.NoTrt_B |
| APOBEC2 | 0.0081  | -0.2917 | 0.049 | 0.1  | 1 | HC_vs_MS.NoTrt_B |
| ZNF428  | 0.00813 | -0.3192 | 0.157 | 0.23 | 1 | HC_vs_MS.NoTrt_B |
| SYT12   | 0.00813 | 0.29188 | 0.716 | 0.72 | 1 | HC_vs_MS.NoTrt_B |
| GGA3    | 0.00819 | -0.332  | 0.139 | 0.22 | 1 | HC_vs_MS.NoTrt_B |
| PRPF6   | 0.0082  | -0.5455 | 0.18  | 0.26 | 1 | HC_vs_MS.NoTrt_B |
| C9orf72 | 0.00823 | -0.3974 | 0.094 | 0.16 | 1 | HC_vs_MS.NoTrt_B |
| AICDA   | 0.00824 | 0.39034 | 0.604 | 0.54 | 1 | HC_vs_MS.NoTrt_B |
| JOSD2   | 0.00825 | -0.411  | 0.065 | 0.12 | 1 | HC_vs_MS.NoTrt_B |
| SAT2    | 0.00825 | -0.4229 | 0.086 | 0.15 | 1 | HC_vs_MS.NoTrt_B |
| LSS     | 0.00828 | -0.3049 | 0.078 | 0.14 | 1 | HC_vs_MS.NoTrt_B |
| DSEL    | 0.00831 | 0.46028 | 0.657 | 0.6  | 1 | HC_vs_MS.NoTrt_B |
| FCAR    | 0.00836 | 0.30641 | 0.87  | 0.87 | 1 | HC_vs_MS.NoTrt_B |
| PAX5    | 0.00841 | 0.49237 | 0.119 | 0.05 | 1 | HC_vs_MS.NoTrt_B |
| ABCF3   | 0.00845 | -0.5987 | 0.129 | 0.2  | 1 | HC_vs_MS.NoTrt_B |
| IZUMO2  | 0.00845 | 0.28362 | 0.897 | 0.93 | 1 | HC_vs_MS.NoTrt_B |
| KLHL33  | 0.00848 | 0.41378 | 0.497 | 0.42 | 1 | HC_vs_MS.NoTrt_B |
| MAB21L3 | 0.00856 | 0.75314 | 0.362 | 0.28 | 1 | HC_vs_MS.NoTrt_B |
| EI24    | 0.00859 | 0.39026 | 0.736 | 0.72 | 1 | HC_vs_MS.NoTrt_B |
| SCLY    | 0.00859 | 0.49441 | 0.958 | 0.96 | 1 | HC_vs_MS.NoTrt_B |
| MRPS33  | 0.00866 | 0.29641 | 0.916 | 0.93 | 1 | HC_vs_MS.NoTrt_B |
| BEST1   | 0.00872 | 0.89933 | 0.806 | 0.8  | 1 | HC_vs_MS.NoTrt_B |
| DENND2C | 0.00881 | 0.34851 | 0.751 | 0.73 | 1 | HC_vs_MS.NoTrt_B |
| ZEB2    | 0.00881 | 0.36516 | 0.6   | 0.53 | 1 | HC_vs_MS.NoTrt_B |

|          |         |         |       |      |   |                  |
|----------|---------|---------|-------|------|---|------------------|
| NIPA1    | 0.00884 | -0.4735 | 0.101 | 0.17 | 1 | HC_vs_MS.NoTrt_B |
| OCLN     | 0.0089  | 0.73303 | 0.796 | 0.77 | 1 | HC_vs_MS.NoTrt_B |
| ZNF619   | 0.00894 | 0.53285 | 0.716 | 0.7  | 1 | HC_vs_MS.NoTrt_B |
| ADCY1    | 0.00896 | 0.38258 | 0.135 | 0.22 | 1 | HC_vs_MS.NoTrt_B |
| OSBPL11  | 0.00904 | -0.3151 | 0.054 | 0.11 | 1 | HC_vs_MS.NoTrt_B |
| TMEM106B | 0.00907 | 0.56203 | 0.888 | 0.89 | 1 | HC_vs_MS.NoTrt_B |
| DENR     | 0.00907 | 0.27469 | 0.752 | 0.68 | 1 | HC_vs_MS.NoTrt_B |
| MMP25    | 0.00908 | 1.0808  | 0.112 | 0.05 | 1 | HC_vs_MS.NoTrt_B |
| IGF2R    | 0.00908 | 0.5916  | 0.401 | 0.32 | 1 | HC_vs_MS.NoTrt_B |
| PDGFA    | 0.00909 | 0.66913 | 0.501 | 0.42 | 1 | HC_vs_MS.NoTrt_B |
| FUT11    | 0.0091  | 0.52784 | 0.757 | 0.72 | 1 | HC_vs_MS.NoTrt_B |
| OR52A1   | 0.00914 | 0.36632 | 0.749 | 0.72 | 1 | HC_vs_MS.NoTrt_B |
| MOK      | 0.00923 | 0.27328 | 0.79  | 0.8  | 1 | HC_vs_MS.NoTrt_B |
| GCNT4    | 0.00929 | 0.87284 | 0.475 | 0.43 | 1 | HC_vs_MS.NoTrt_B |
| ZDHHC12  | 0.00931 | -0.5727 | 0.096 | 0.16 | 1 | HC_vs_MS.NoTrt_B |
| SLC25A25 | 0.0094  | -0.3209 | 0.086 | 0.15 | 1 | HC_vs_MS.NoTrt_B |
| CDK5RAP3 | 0.00943 | -0.2832 | 0.581 | 0.69 | 1 | HC_vs_MS.NoTrt_B |
| PSMA4    | 0.00944 | -0.5267 | 0.349 | 0.43 | 1 | HC_vs_MS.NoTrt_B |
| CHRNA7   | 0.00946 | 0.26603 | 0.794 | 0.78 | 1 | HC_vs_MS.NoTrt_B |
| TUSC2    | 0.00946 | -0.3958 | 0.062 | 0.12 | 1 | HC_vs_MS.NoTrt_B |
| FGFR1    | 0.00949 | 0.5007  | 0.783 | 0.78 | 1 | HC_vs_MS.NoTrt_B |
| POLK     | 0.00951 | 0.56084 | 0.842 | 0.79 | 1 | HC_vs_MS.NoTrt_B |
| FAM234A  | 0.00956 | -0.8955 | 0.196 | 0.28 | 1 | HC_vs_MS.NoTrt_B |
| TLR6     | 0.00961 | 1.22441 | 0.303 | 0.22 | 1 | HC_vs_MS.NoTrt_B |
| SLFN12L  | 0.00963 | 0.25096 | 0.835 | 0.81 | 1 | HC_vs_MS.NoTrt_B |
| TUBGCP4  | 0.00966 | 0.53704 | 0.784 | 0.8  | 1 | HC_vs_MS.NoTrt_B |
| ARMC2    | 0.00966 | -0.3553 | 0.051 | 0.1  | 1 | HC_vs_MS.NoTrt_B |
| REPS1    | 0.00967 | 0.75001 | 0.632 | 0.62 | 1 | HC_vs_MS.NoTrt_B |
| DHRS4L2  | 0.00975 | -0.2933 | 0.142 | 0.22 | 1 | HC_vs_MS.NoTrt_B |
| IKZF5    | 0.00981 | 0.52621 | 0.158 | 0.25 | 1 | HC_vs_MS.NoTrt_B |
| ISG20L2  | 0.00982 | 0.49235 | 0.803 | 0.78 | 1 | HC_vs_MS.NoTrt_B |
| FRMPD1   | 0.00983 | 0.28763 | 0.83  | 0.85 | 1 | HC_vs_MS.NoTrt_B |
| LYPD5    | 0.00986 | 0.40483 | 0.699 | 0.71 | 1 | HC_vs_MS.NoTrt_B |
| RGPD5    | 0.00988 | 0.76576 | 0.816 | 0.83 | 1 | HC_vs_MS.NoTrt_B |
| TMEM236  | 0.0099  | 0.4642  | 0.73  | 0.71 | 1 | HC_vs_MS.NoTrt_B |
| CYTH2    | 0.00993 | -0.2504 | 0.591 | 0.75 | 1 | HC_vs_MS.NoTrt_B |
| ARPIN    | 0.00993 | 0.29685 | 0.87  | 0.85 | 1 | HC_vs_MS.NoTrt_B |
| ACSS2    | 0.00998 | 1.7802  | 0.549 | 0.5  | 1 | HC_vs_MS.NoTrt_B |
| TUBA4A   | 0.01001 | -0.3214 | 0.22  | 0.31 | 1 | HC_vs_MS.NoTrt_B |
| SLC18B1  | 0.01002 | -0.6767 | 0.055 | 0.11 | 1 | HC_vs_MS.NoTrt_B |

|            |         |         |       |      |   |                  |
|------------|---------|---------|-------|------|---|------------------|
| AKAP8L     | 0.01003 | -0.4326 | 0.059 | 0.11 | 1 | HC_vs_MS.NoTrt_B |
| HIST1H2BN  | 0.01008 | 0.27795 | 0.652 | 0.59 | 1 | HC_vs_MS.NoTrt_B |
| FIS1       | 0.01008 | -0.398  | 0.235 | 0.32 | 1 | HC_vs_MS.NoTrt_B |
| C16orf72   | 0.0101  | 0.70576 | 0.826 | 0.82 | 1 | HC_vs_MS.NoTrt_B |
| ZNF578     | 0.01011 | 0.39501 | 0.939 | 0.94 | 1 | HC_vs_MS.NoTrt_B |
| MIA2       | 0.01014 | 0.34119 | 0.38  | 0.3  | 1 | HC_vs_MS.NoTrt_B |
| ANAPC5     | 0.01026 | -0.2869 | 0.946 | 0.98 | 1 | HC_vs_MS.NoTrt_B |
| HIF3A      | 0.01027 | 0.30915 | 0.864 | 0.84 | 1 | HC_vs_MS.NoTrt_B |
| ZNF480     | 0.01028 | 1.23772 | 0.722 | 0.72 | 1 | HC_vs_MS.NoTrt_B |
| REL        | 0.01039 | 0.29628 | 0.954 | 0.95 | 1 | HC_vs_MS.NoTrt_B |
| KIAA1456   | 0.01043 | 0.26345 | 0.903 | 0.92 | 1 | HC_vs_MS.NoTrt_B |
| CSNK2A2    | 0.01045 | -0.4035 | 0.27  | 0.35 | 1 | HC_vs_MS.NoTrt_B |
| TRPM7      | 0.01048 | 0.26945 | 0.92  | 0.9  | 1 | HC_vs_MS.NoTrt_B |
| RP11-411B6 | 0.01049 | 0.59922 | 0.219 | 0.32 | 1 | HC_vs_MS.NoTrt_B |
| ADH1B      | 0.01049 | 0.38225 | 0.322 | 0.25 | 1 | HC_vs_MS.NoTrt_B |
| AGO3       | 0.01052 | 0.64197 | 0.965 | 0.96 | 1 | HC_vs_MS.NoTrt_B |
| FAM111B    | 0.01052 | 0.35158 | 0.572 | 0.55 | 1 | HC_vs_MS.NoTrt_B |
| RPGRIP1L   | 0.01053 | 0.2587  | 0.722 | 0.7  | 1 | HC_vs_MS.NoTrt_B |
| ORMDL3     | 0.01062 | -0.393  | 0.091 | 0.16 | 1 | HC_vs_MS.NoTrt_B |
| RUVBL1     | 0.01072 | 0.57655 | 0.643 | 0.58 | 1 | HC_vs_MS.NoTrt_B |
| HLA-DQB1   | 0.01072 | -0.5362 | 0.546 | 0.65 | 1 | HC_vs_MS.NoTrt_B |
| LIX1L      | 0.01075 | 0.59315 | 0.775 | 0.76 | 1 | HC_vs_MS.NoTrt_B |
| LIPA       | 0.01076 | -0.3621 | 0.262 | 0.35 | 1 | HC_vs_MS.NoTrt_B |
| A2M        | 0.01078 | 0.73998 | 0.126 | 0.06 | 1 | HC_vs_MS.NoTrt_B |
| PTPRB      | 0.01085 | 0.38281 | 0.514 | 0.46 | 1 | HC_vs_MS.NoTrt_B |
| PIH1D1     | 0.01086 | -0.4144 | 0.245 | 0.32 | 1 | HC_vs_MS.NoTrt_B |
| DDIT4      | 0.01087 | -0.3991 | 0.132 | 0.21 | 1 | HC_vs_MS.NoTrt_B |
| TOR2A      | 0.01095 | -0.5647 | 0.052 | 0.1  | 1 | HC_vs_MS.NoTrt_B |
| KCNK6      | 0.01098 | 0.51298 | 0.959 | 0.96 | 1 | HC_vs_MS.NoTrt_B |
| CA5B       | 0.01098 | 0.60786 | 0.872 | 0.89 | 1 | HC_vs_MS.NoTrt_B |
| PLA2G4C    | 0.01107 | 0.27238 | 0.938 | 0.95 | 1 | HC_vs_MS.NoTrt_B |
| GNG10      | 0.01109 | -0.2956 | 0.11  | 0.18 | 1 | HC_vs_MS.NoTrt_B |
| SGK3       | 0.01109 | 0.38429 | 0.906 | 0.89 | 1 | HC_vs_MS.NoTrt_B |
| IQGAP1     | 0.01112 | -0.3118 | 0.791 | 0.91 | 1 | HC_vs_MS.NoTrt_B |
| GNB4       | 0.01113 | 0.46274 | 0.791 | 0.77 | 1 | HC_vs_MS.NoTrt_B |
| PIGW       | 0.01114 | 0.73937 | 0.459 | 0.38 | 1 | HC_vs_MS.NoTrt_B |
| C4BPB      | 0.01115 | 0.44509 | 0.78  | 0.82 | 1 | HC_vs_MS.NoTrt_B |
| AFF3       | 0.01118 | 1.25058 | 0.748 | 0.73 | 1 | HC_vs_MS.NoTrt_B |
| AP1B1      | 0.01129 | -0.5555 | 0.145 | 0.22 | 1 | HC_vs_MS.NoTrt_B |
| CLEC18A    | 0.01129 | 0.72485 | 0.281 | 0.38 | 1 | HC_vs_MS.NoTrt_B |

|          |         |         |       |      |   |                  |
|----------|---------|---------|-------|------|---|------------------|
| PPA2     | 0.01133 | -0.3172 | 0.633 | 0.74 | 1 | HC_vs_MS.NoTrt_B |
| KIR3DX1  | 0.01133 | 0.27268 | 0.861 | 0.91 | 1 | HC_vs_MS.NoTrt_B |
| PRDX3    | 0.01134 | -0.2639 | 0.409 | 0.51 | 1 | HC_vs_MS.NoTrt_B |
| FOXL2NB  | 0.01134 | 0.43764 | 0.726 | 0.7  | 1 | HC_vs_MS.NoTrt_B |
| IFT122   | 0.01135 | 0.61539 | 0.862 | 0.88 | 1 | HC_vs_MS.NoTrt_B |
| MCRIP1   | 0.01143 | -0.3217 | 0.381 | 0.48 | 1 | HC_vs_MS.NoTrt_B |
| MED6     | 0.01144 | 0.33549 | 0.571 | 0.48 | 1 | HC_vs_MS.NoTrt_B |
| SPIB     | 0.01145 | 0.32299 | 0.822 | 0.85 | 1 | HC_vs_MS.NoTrt_B |
| IL15RA   | 0.01149 | -0.6522 | 0.072 | 0.13 | 1 | HC_vs_MS.NoTrt_B |
| RNF115   | 0.01152 | 0.31776 | 0.964 | 0.98 | 1 | HC_vs_MS.NoTrt_B |
| ZNF333   | 0.01152 | 0.31508 | 0.9   | 0.89 | 1 | HC_vs_MS.NoTrt_B |
| RTEL1    | 0.01157 | -0.4043 | 0.072 | 0.13 | 1 | HC_vs_MS.NoTrt_B |
| STIL     | 0.01157 | 0.42101 | 0.607 | 0.55 | 1 | HC_vs_MS.NoTrt_B |
| CYB561D1 | 0.01158 | 0.32649 | 0.461 | 0.37 | 1 | HC_vs_MS.NoTrt_B |
| ERGIC3   | 0.01164 | -0.5607 | 0.803 | 0.87 | 1 | HC_vs_MS.NoTrt_B |
| GLTSCR1L | 0.01165 | -0.3245 | 0.149 | 0.23 | 1 | HC_vs_MS.NoTrt_B |
| KPNA2    | 0.01169 | -0.7324 | 0.072 | 0.13 | 1 | HC_vs_MS.NoTrt_B |
| ARRB2    | 0.01169 | 0.36641 | 0.771 | 0.71 | 1 | HC_vs_MS.NoTrt_B |
| AGTRAP   | 0.01169 | -0.6174 | 0.077 | 0.14 | 1 | HC_vs_MS.NoTrt_B |
| ZC3H6    | 0.01172 | 0.57037 | 0.794 | 0.83 | 1 | HC_vs_MS.NoTrt_B |
| FAHD2A   | 0.01174 | 0.45438 | 0.154 | 0.24 | 1 | HC_vs_MS.NoTrt_B |
| IRF2BP2  | 0.01176 | 0.83208 | 0.197 | 0.12 | 1 | HC_vs_MS.NoTrt_B |
| ANXA2R   | 0.01177 | -0.3672 | 0.178 | 0.26 | 1 | HC_vs_MS.NoTrt_B |
| COG2     | 0.01195 | -0.2619 | 0.286 | 0.38 | 1 | HC_vs_MS.NoTrt_B |
| AGRN     | 0.01199 | 0.50723 | 0.335 | 0.26 | 1 | HC_vs_MS.NoTrt_B |
| SNRPA1   | 0.01205 | -0.2697 | 0.652 | 0.73 | 1 | HC_vs_MS.NoTrt_B |
| ADGRD2   | 0.0121  | 0.32866 | 0.754 | 0.76 | 1 | HC_vs_MS.NoTrt_B |
| ZNF841   | 0.01213 | 0.87687 | 0.504 | 0.45 | 1 | HC_vs_MS.NoTrt_B |
| KLRK1    | 0.01214 | 0.56239 | 0.643 | 0.62 | 1 | HC_vs_MS.NoTrt_B |
| SMYD2    | 0.01214 | -0.4583 | 0.139 | 0.21 | 1 | HC_vs_MS.NoTrt_B |
| NALCN    | 0.01224 | 0.28328 | 0.558 | 0.45 | 1 | HC_vs_MS.NoTrt_B |
| C1orf43  | 0.01224 | -0.3501 | 0.512 | 0.62 | 1 | HC_vs_MS.NoTrt_B |
| VWA2     | 0.01226 | 0.30818 | 0.725 | 0.68 | 1 | HC_vs_MS.NoTrt_B |
| RNF126   | 0.01231 | -0.2551 | 0.18  | 0.26 | 1 | HC_vs_MS.NoTrt_B |
| ECHS1    | 0.01231 | -0.4764 | 0.093 | 0.16 | 1 | HC_vs_MS.NoTrt_B |
| INPP5K   | 0.01235 | -0.6957 | 0.458 | 0.55 | 1 | HC_vs_MS.NoTrt_B |
| UBR5     | 0.01237 | 0.57179 | 0.816 | 0.81 | 1 | HC_vs_MS.NoTrt_B |
| USMG5    | 0.01245 | -0.3461 | 0.188 | 0.28 | 1 | HC_vs_MS.NoTrt_B |
| CLDN19   | 0.01246 | -0.3924 | 0.183 | 0.28 | 1 | HC_vs_MS.NoTrt_B |
| HTRA2    | 0.01248 | -0.286  | 0.088 | 0.15 | 1 | HC_vs_MS.NoTrt_B |

|          |         |         |       |      |   |                  |
|----------|---------|---------|-------|------|---|------------------|
| EPHA1    | 0.01251 | -0.3369 | 0.328 | 0.43 | 1 | HC_vs_MS.NoTrt_B |
| PPM1F    | 0.01254 | 0.73666 | 0.796 | 0.81 | 1 | HC_vs_MS.NoTrt_B |
| TRAPPC4  | 0.01256 | 0.50064 | 0.903 | 0.92 | 1 | HC_vs_MS.NoTrt_B |
| U2AF1L5  | 0.0126  | -0.316  | 0.632 | 0.7  | 1 | HC_vs_MS.NoTrt_B |
| RGS12    | 0.01261 | 0.95106 | 0.823 | 0.84 | 1 | HC_vs_MS.NoTrt_B |
| BOLA2B   | 0.01266 | 0.32009 | 0.094 | 0.16 | 1 | HC_vs_MS.NoTrt_B |
| DDX27    | 0.01267 | -0.2654 | 0.58  | 0.68 | 1 | HC_vs_MS.NoTrt_B |
| IFT22    | 0.01268 | 0.33877 | 0.964 | 0.94 | 1 | HC_vs_MS.NoTrt_B |
| TCF7L1   | 0.01269 | 0.39815 | 0.655 | 0.61 | 1 | HC_vs_MS.NoTrt_B |
| LAS1L    | 0.01272 | -0.4267 | 0.125 | 0.2  | 1 | HC_vs_MS.NoTrt_B |
| CEP112   | 0.01272 | 0.27826 | 0.933 | 0.91 | 1 | HC_vs_MS.NoTrt_B |
| BIRC2    | 0.01275 | 0.32392 | 0.133 | 0.21 | 1 | HC_vs_MS.NoTrt_B |
| CXCR4    | 0.01286 | 0.97128 | 0.188 | 0.11 | 1 | HC_vs_MS.NoTrt_B |
| GGT5     | 0.01288 | 0.3147  | 0.659 | 0.62 | 1 | HC_vs_MS.NoTrt_B |
| HNRNPH3  | 0.0129  | -0.2872 | 0.291 | 0.38 | 1 | HC_vs_MS.NoTrt_B |
| CREG2    | 0.01294 | 0.50122 | 0.677 | 0.63 | 1 | HC_vs_MS.NoTrt_B |
| PCDHB11  | 0.01296 | 0.3189  | 0.642 | 0.6  | 1 | HC_vs_MS.NoTrt_B |
| FAXDC2   | 0.01306 | 0.53619 | 0.839 | 0.85 | 1 | HC_vs_MS.NoTrt_B |
| LIMK2    | 0.01308 | -0.2849 | 0.201 | 0.29 | 1 | HC_vs_MS.NoTrt_B |
| ARF6     | 0.01312 | 0.33887 | 0.535 | 0.64 | 1 | HC_vs_MS.NoTrt_B |
| CYP3A43  | 0.01313 | 0.33928 | 0.696 | 0.71 | 1 | HC_vs_MS.NoTrt_B |
| MXRA7    | 0.01318 | 0.79826 | 0.78  | 0.79 | 1 | HC_vs_MS.NoTrt_B |
| CGRRF1   | 0.01325 | -0.3885 | 0.257 | 0.35 | 1 | HC_vs_MS.NoTrt_B |
| AMACR    | 0.0133  | -1.1905 | 0.052 | 0.1  | 1 | HC_vs_MS.NoTrt_B |
| EVI5     | 0.01346 | 0.47732 | 0.828 | 0.81 | 1 | HC_vs_MS.NoTrt_B |
| C12orf76 | 0.01347 | 0.27792 | 0.952 | 0.96 | 1 | HC_vs_MS.NoTrt_B |
| ADAMTS4  | 0.01349 | 0.51984 | 0.896 | 0.91 | 1 | HC_vs_MS.NoTrt_B |
| BANF1    | 0.01363 | -0.3347 | 0.181 | 0.27 | 1 | HC_vs_MS.NoTrt_B |
| SRCIN1   | 0.01367 | 0.35724 | 0.516 | 0.45 | 1 | HC_vs_MS.NoTrt_B |
| POLA2    | 0.01368 | -0.4216 | 0.597 | 0.7  | 1 | HC_vs_MS.NoTrt_B |
| PHLDA3   | 0.01373 | -0.3187 | 0.303 | 0.41 | 1 | HC_vs_MS.NoTrt_B |
| RABGGTA  | 0.01374 | -0.4476 | 0.099 | 0.16 | 1 | HC_vs_MS.NoTrt_B |
| CCR4     | 0.01375 | -0.3374 | 0.861 | 0.91 | 1 | HC_vs_MS.NoTrt_B |
| USP49    | 0.0138  | 0.56559 | 0.694 | 0.65 | 1 | HC_vs_MS.NoTrt_B |
| CHMP4A   | 0.01385 | -0.4054 | 0.629 | 0.69 | 1 | HC_vs_MS.NoTrt_B |
| NDUFV3   | 0.0139  | 0.36916 | 0.954 | 0.97 | 1 | HC_vs_MS.NoTrt_B |
| UBE2F    | 0.01392 | -0.3813 | 0.661 | 0.76 | 1 | HC_vs_MS.NoTrt_B |
| TPCN2    | 0.01396 | 0.55847 | 0.619 | 0.57 | 1 | HC_vs_MS.NoTrt_B |
| VGLL4    | 0.01402 | 0.45024 | 0.941 | 0.95 | 1 | HC_vs_MS.NoTrt_B |
| GPR1     | 0.01422 | 0.35065 | 0.243 | 0.16 | 1 | HC_vs_MS.NoTrt_B |



|          |         |         |       |      |   |                  |
|----------|---------|---------|-------|------|---|------------------|
| ZNF611   | 0.01429 | 0.48286 | 0.951 | 0.96 | 1 | HC_vs_MS.NoTrt_B |
| ABCF2    | 0.01433 | -0.2505 | 0.226 | 0.32 | 1 | HC_vs_MS.NoTrt_B |
| PRKAA1   | 0.01434 | 0.48109 | 0.891 | 0.9  | 1 | HC_vs_MS.NoTrt_B |
| NCOR2    | 0.01436 | 0.52094 | 0.404 | 0.31 | 1 | HC_vs_MS.NoTrt_B |
| SPATA17  | 0.01443 | 0.32706 | 0.613 | 0.56 | 1 | HC_vs_MS.NoTrt_B |
| SART3    | 0.01461 | -0.2626 | 0.138 | 0.21 | 1 | HC_vs_MS.NoTrt_B |
| MINPP1   | 0.01461 | -0.4172 | 0.072 | 0.13 | 1 | HC_vs_MS.NoTrt_B |
| LILRA6   | 0.01463 | 0.29613 | 0.523 | 0.44 | 1 | HC_vs_MS.NoTrt_B |
| PSEN1    | 0.01464 | -0.4018 | 0.68  | 0.77 | 1 | HC_vs_MS.NoTrt_B |
| PTGIS    | 0.01464 | 0.30814 | 0.667 | 0.64 | 1 | HC_vs_MS.NoTrt_B |
| ZNF483   | 0.01469 | 0.65352 | 0.826 | 0.84 | 1 | HC_vs_MS.NoTrt_B |
| COL1A1   | 0.0147  | 0.49846 | 0.497 | 0.45 | 1 | HC_vs_MS.NoTrt_B |
| AKAP6    | 0.01473 | 0.4557  | 0.697 | 0.63 | 1 | HC_vs_MS.NoTrt_B |
| CHD6     | 0.01475 | -0.3726 | 0.183 | 0.27 | 1 | HC_vs_MS.NoTrt_B |
| CHMP1A   | 0.01477 | -0.4324 | 0.172 | 0.25 | 1 | HC_vs_MS.NoTrt_B |
| PSMD13   | 0.01481 | -0.3803 | 0.52  | 0.62 | 1 | HC_vs_MS.NoTrt_B |
| KRCC1    | 0.01481 | -0.4837 | 0.099 | 0.16 | 1 | HC_vs_MS.NoTrt_B |
| CRISPLD2 | 0.01484 | 0.3229  | 0.772 | 0.8  | 1 | HC_vs_MS.NoTrt_B |
| ALDH1L1  | 0.01488 | 0.31072 | 0.583 | 0.54 | 1 | HC_vs_MS.NoTrt_B |
| FER      | 0.0149  | 1.46334 | 0.504 | 0.46 | 1 | HC_vs_MS.NoTrt_B |
| ZNF724   | 0.01493 | 0.59521 | 0.899 | 0.92 | 1 | HC_vs_MS.NoTrt_B |
| TCF4     | 0.01494 | 0.62374 | 0.697 | 0.67 | 1 | HC_vs_MS.NoTrt_B |
| STAMBP   | 0.01499 | -0.2585 | 0.112 | 0.18 | 1 | HC_vs_MS.NoTrt_B |
| ZNF385C  | 0.01501 | 0.27154 | 0.581 | 0.52 | 1 | HC_vs_MS.NoTrt_B |
| TLR5     | 0.01528 | 1.14705 | 0.636 | 0.61 | 1 | HC_vs_MS.NoTrt_B |
| TRABD2A  | 0.01544 | 0.49307 | 0.833 | 0.79 | 1 | HC_vs_MS.NoTrt_B |
| MIF4GD   | 0.01547 | -0.3582 | 0.09  | 0.15 | 1 | HC_vs_MS.NoTrt_B |
| CXCR3    | 0.0155  | -0.3751 | 0.103 | 0.17 | 1 | HC_vs_MS.NoTrt_B |
| SEC24B   | 0.01554 | 0.29573 | 0.494 | 0.63 | 1 | HC_vs_MS.NoTrt_B |
| SIM1     | 0.0156  | 0.52697 | 0.261 | 0.18 | 1 | HC_vs_MS.NoTrt_B |
| TPD52L2  | 0.01561 | -0.5328 | 0.201 | 0.28 | 1 | HC_vs_MS.NoTrt_B |
| MCM5     | 0.01574 | -0.6709 | 0.164 | 0.23 | 1 | HC_vs_MS.NoTrt_B |
| NICN1    | 0.01576 | 0.5794  | 0.77  | 0.73 | 1 | HC_vs_MS.NoTrt_B |
| SLC16A6  | 0.01578 | 0.29996 | 0.242 | 0.34 | 1 | HC_vs_MS.NoTrt_B |
| QDPR     | 0.01592 | -0.7512 | 0.058 | 0.11 | 1 | HC_vs_MS.NoTrt_B |
| TMEM127  | 0.01593 | 0.70143 | 0.691 | 0.63 | 1 | HC_vs_MS.NoTrt_B |
| NPIP5    | 0.01594 | 0.54502 | 0.926 | 0.95 | 1 | HC_vs_MS.NoTrt_B |
| C4orf36  | 0.01596 | 0.45106 | 0.838 | 0.89 | 1 | HC_vs_MS.NoTrt_B |
| DSN1     | 0.016   | -0.4962 | 0.225 | 0.31 | 1 | HC_vs_MS.NoTrt_B |
| HVCN1    | 0.01609 | 0.70045 | 0.501 | 0.42 | 1 | HC_vs_MS.NoTrt_B |

|            |         |         |       |      |   |                  |
|------------|---------|---------|-------|------|---|------------------|
| TMEM167A   | 0.01609 | -0.3367 | 0.329 | 0.43 | 1 | HC_vs_MS.NoTrt_B |
| DAND5      | 0.01611 | 0.36145 | 0.749 | 0.69 | 1 | HC_vs_MS.NoTrt_B |
| COA7       | 0.01616 | 0.28643 | 0.871 | 0.86 | 1 | HC_vs_MS.NoTrt_B |
| RP11-343C2 | 0.01618 | -0.3868 | 0.112 | 0.18 | 1 | HC_vs_MS.NoTrt_B |
| TMEM35B    | 0.0162  | -0.5814 | 0.152 | 0.23 | 1 | HC_vs_MS.NoTrt_B |
| TIPARP     | 0.01622 | -0.3723 | 0.062 | 0.11 | 1 | HC_vs_MS.NoTrt_B |
| SLC25A5    | 0.01623 | -0.2981 | 0.278 | 0.37 | 1 | HC_vs_MS.NoTrt_B |
| FLRT2      | 0.01626 | 0.26023 | 0.92  | 0.9  | 1 | HC_vs_MS.NoTrt_B |
| PNPLA1     | 0.01637 | 0.62558 | 0.309 | 0.23 | 1 | HC_vs_MS.NoTrt_B |
| PPCDC      | 0.01641 | -0.2965 | 0.058 | 0.11 | 1 | HC_vs_MS.NoTrt_B |
| BAIAP2L1   | 0.01647 | 0.47042 | 0.533 | 0.46 | 1 | HC_vs_MS.NoTrt_B |
| FBN1       | 0.01652 | 0.39578 | 0.416 | 0.35 | 1 | HC_vs_MS.NoTrt_B |
| ZNF570     | 0.01652 | 0.47346 | 0.78  | 0.75 | 1 | HC_vs_MS.NoTrt_B |
| FAM117B    | 0.01662 | 0.90262 | 0.449 | 0.37 | 1 | HC_vs_MS.NoTrt_B |
| FAM221A    | 0.01672 | 0.3037  | 0.961 | 0.96 | 1 | HC_vs_MS.NoTrt_B |
| PEF1       | 0.01683 | -0.405  | 0.128 | 0.2  | 1 | HC_vs_MS.NoTrt_B |
| AK3        | 0.01684 | 0.40028 | 0.464 | 0.38 | 1 | HC_vs_MS.NoTrt_B |
| RTF1       | 0.01687 | -0.5348 | 0.557 | 0.64 | 1 | HC_vs_MS.NoTrt_B |
| LRRC56     | 0.01691 | 0.39307 | 0.38  | 0.29 | 1 | HC_vs_MS.NoTrt_B |
| SCRN3      | 0.01697 | -0.4021 | 0.426 | 0.51 | 1 | HC_vs_MS.NoTrt_B |
| CISD2      | 0.01709 | 0.59593 | 0.439 | 0.53 | 1 | HC_vs_MS.NoTrt_B |
| VPS13C     | 0.0171  | 0.26561 | 0.751 | 0.85 | 1 | HC_vs_MS.NoTrt_B |
| MICAL1     | 0.01711 | -0.3861 | 0.219 | 0.3  | 1 | HC_vs_MS.NoTrt_B |
| DCTN3      | 0.01725 | -0.4993 | 0.361 | 0.45 | 1 | HC_vs_MS.NoTrt_B |
| RP11-722G7 | 0.01729 | 0.55867 | 0.438 | 0.33 | 1 | HC_vs_MS.NoTrt_B |
| XXYLT1     | 0.01733 | -1.4796 | 0.183 | 0.25 | 1 | HC_vs_MS.NoTrt_B |
| EIF5A2     | 0.01735 | 0.44178 | 0.296 | 0.39 | 1 | HC_vs_MS.NoTrt_B |
| ATM        | 0.01739 | 0.75435 | 0.952 | 0.98 | 1 | HC_vs_MS.NoTrt_B |
| TF         | 0.01742 | 0.41069 | 0.888 | 0.91 | 1 | HC_vs_MS.NoTrt_B |
| NRF1       | 0.01742 | -0.4535 | 0.29  | 0.38 | 1 | HC_vs_MS.NoTrt_B |
| SAMD4B     | 0.01747 | 0.79822 | 0.842 | 0.85 | 1 | HC_vs_MS.NoTrt_B |
| DDT        | 0.01755 | -0.4827 | 0.132 | 0.2  | 1 | HC_vs_MS.NoTrt_B |
| ITGA3      | 0.01755 | 0.42148 | 0.754 | 0.7  | 1 | HC_vs_MS.NoTrt_B |
| ERGIC2     | 0.01757 | 0.33996 | 0.471 | 0.58 | 1 | HC_vs_MS.NoTrt_B |
| CCR7       | 0.01761 | 0.5033  | 0.613 | 0.57 | 1 | HC_vs_MS.NoTrt_B |
| PRKAG2     | 0.01763 | -0.5258 | 0.299 | 0.39 | 1 | HC_vs_MS.NoTrt_B |
| GCNT3      | 0.01785 | 0.33041 | 0.877 | 0.86 | 1 | HC_vs_MS.NoTrt_B |
| DDX17      | 0.01786 | 0.45022 | 0.907 | 0.95 | 1 | HC_vs_MS.NoTrt_B |
| KMT2D      | 0.01806 | 0.71514 | 0.855 | 0.83 | 1 | HC_vs_MS.NoTrt_B |
| CLCN7      | 0.01813 | 0.32075 | 0.284 | 0.4  | 1 | HC_vs_MS.NoTrt_B |

|          |         |         |       |      |   |                  |
|----------|---------|---------|-------|------|---|------------------|
| SERTAD1  | 0.01815 | 0.91301 | 0.339 | 0.25 | 1 | HC_vs_MS.NoTrt_B |
| XAB2     | 0.01816 | 0.41709 | 0.228 | 0.32 | 1 | HC_vs_MS.NoTrt_B |
| CEACAM8  | 0.01816 | 0.37794 | 0.504 | 0.44 | 1 | HC_vs_MS.NoTrt_B |
| SULT1A3  | 0.01821 | -0.5439 | 0.606 | 0.63 | 1 | HC_vs_MS.NoTrt_B |
| RFTN2    | 0.01827 | 0.36776 | 0.68  | 0.62 | 1 | HC_vs_MS.NoTrt_B |
| KCNA3    | 0.01827 | -0.3848 | 0.168 | 0.24 | 1 | HC_vs_MS.NoTrt_B |
| CDC123   | 0.01833 | -0.2717 | 0.188 | 0.27 | 1 | HC_vs_MS.NoTrt_B |
| CDK10    | 0.01848 | 0.58225 | 0.91  | 0.92 | 1 | HC_vs_MS.NoTrt_B |
| PCBD1    | 0.0186  | -0.3935 | 0.062 | 0.11 | 1 | HC_vs_MS.NoTrt_B |
| TNFRSF18 | 0.01865 | -0.6705 | 0.067 | 0.12 | 1 | HC_vs_MS.NoTrt_B |
| LDHA     | 0.01871 | -0.3985 | 0.732 | 0.76 | 1 | HC_vs_MS.NoTrt_B |
| MPLKIP   | 0.01876 | 0.39628 | 0.941 | 0.96 | 1 | HC_vs_MS.NoTrt_B |
| LGR6     | 0.01878 | 0.31948 | 0.178 | 0.11 | 1 | HC_vs_MS.NoTrt_B |
| LAT2     | 0.01883 | 0.48144 | 0.854 | 0.84 | 1 | HC_vs_MS.NoTrt_B |
| DPH1     | 0.01893 | 0.25935 | 0.855 | 0.81 | 1 | HC_vs_MS.NoTrt_B |
| VPS53    | 0.01894 | 0.25865 | 0.941 | 0.95 | 1 | HC_vs_MS.NoTrt_B |
| PCDHA10  | 0.01897 | 0.25793 | 0.538 | 0.45 | 1 | HC_vs_MS.NoTrt_B |
| PTPN23   | 0.01909 | 1.53678 | 0.142 | 0.08 | 1 | HC_vs_MS.NoTrt_B |
| AHR      | 0.01914 | 0.44484 | 0.607 | 0.51 | 1 | HC_vs_MS.NoTrt_B |
| INO80    | 0.01927 | -0.5133 | 0.075 | 0.13 | 1 | HC_vs_MS.NoTrt_B |
| FAM153A  | 0.0194  | -0.2973 | 0.452 | 0.54 | 1 | HC_vs_MS.NoTrt_B |
| SEMA5A   | 0.01942 | 0.33672 | 0.39  | 0.31 | 1 | HC_vs_MS.NoTrt_B |
| ZBTB40   | 0.01948 | 0.30486 | 0.365 | 0.45 | 1 | HC_vs_MS.NoTrt_B |
| CDH1     | 0.01957 | 0.27737 | 0.728 | 0.7  | 1 | HC_vs_MS.NoTrt_B |
| ZNF638   | 0.01957 | 0.86454 | 0.388 | 0.31 | 1 | HC_vs_MS.NoTrt_B |
| IFT88    | 0.0196  | -0.3873 | 0.549 | 0.47 | 1 | HC_vs_MS.NoTrt_B |
| RAET1E   | 0.01961 | 0.41944 | 0.307 | 0.23 | 1 | HC_vs_MS.NoTrt_B |
| CPM      | 0.01968 | 0.52184 | 0.803 | 0.8  | 1 | HC_vs_MS.NoTrt_B |
| FAM120A  | 0.01971 | 0.89573 | 0.158 | 0.09 | 1 | HC_vs_MS.NoTrt_B |
| RPS6KB1  | 0.01974 | 0.35194 | 0.839 | 0.82 | 1 | HC_vs_MS.NoTrt_B |
| GK       | 0.0198  | -0.8257 | 0.126 | 0.19 | 1 | HC_vs_MS.NoTrt_B |
| ENAH     | 0.01981 | 0.31129 | 0.687 | 0.66 | 1 | HC_vs_MS.NoTrt_B |
| CCT8     | 0.01988 | -0.2636 | 0.21  | 0.29 | 1 | HC_vs_MS.NoTrt_B |
| GNL3     | 0.01991 | -0.394  | 0.093 | 0.15 | 1 | HC_vs_MS.NoTrt_B |
| ZNF317   | 0.01991 | -0.323  | 0.088 | 0.15 | 1 | HC_vs_MS.NoTrt_B |
| RNF222   | 0.01991 | 0.39363 | 0.401 | 0.33 | 1 | HC_vs_MS.NoTrt_B |
| RHBDD3   | 0.01997 | 0.74832 | 0.467 | 0.39 | 1 | HC_vs_MS.NoTrt_B |
| NEURL1   | 0.01998 | 0.68229 | 0.3   | 0.22 | 1 | HC_vs_MS.NoTrt_B |
| PMS1     | 0.02001 | 0.37803 | 0.564 | 0.67 | 1 | HC_vs_MS.NoTrt_B |
| ALG10    | 0.02004 | 0.36818 | 0.055 | 0.1  | 1 | HC_vs_MS.NoTrt_B |

|          |         |         |       |      |   |                  |
|----------|---------|---------|-------|------|---|------------------|
| STEAP2   | 0.02009 | 0.34584 | 0.68  | 0.69 | 1 | HC_vs_MS.NoTrt_B |
| IFRD2    | 0.02014 | -0.4762 | 0.084 | 0.14 | 1 | HC_vs_MS.NoTrt_B |
| POU2AF1  | 0.02015 | 0.59235 | 0.694 | 0.7  | 1 | HC_vs_MS.NoTrt_B |
| ATP1B1   | 0.02017 | -0.6339 | 0.161 | 0.23 | 1 | HC_vs_MS.NoTrt_B |
| UBL3     | 0.0202  | -0.2965 | 0.165 | 0.24 | 1 | HC_vs_MS.NoTrt_B |
| CDC27    | 0.0202  | -0.5272 | 0.438 | 0.51 | 1 | HC_vs_MS.NoTrt_B |
| FBXO4    | 0.02031 | -0.2906 | 0.201 | 0.28 | 1 | HC_vs_MS.NoTrt_B |
| VEZT     | 0.02048 | -0.326  | 0.742 | 0.7  | 1 | HC_vs_MS.NoTrt_B |
| LENG8    | 0.0205  | 0.63542 | 0.741 | 0.75 | 1 | HC_vs_MS.NoTrt_B |
| PANK1    | 0.02064 | 0.37429 | 0.452 | 0.41 | 1 | HC_vs_MS.NoTrt_B |
| CATSPERB | 0.02097 | 0.58202 | 0.622 | 0.58 | 1 | HC_vs_MS.NoTrt_B |
| MTMR14   | 0.02098 | -0.3807 | 0.571 | 0.69 | 1 | HC_vs_MS.NoTrt_B |
| DDX42    | 0.02123 | 0.50943 | 0.339 | 0.45 | 1 | HC_vs_MS.NoTrt_B |
| PDE4DIP  | 0.02134 | 0.27741 | 0.864 | 0.89 | 1 | HC_vs_MS.NoTrt_B |
| MAGI2    | 0.02135 | 0.28673 | 0.787 | 0.78 | 1 | HC_vs_MS.NoTrt_B |
| ARHGAP19 | 0.02136 | -0.4785 | 0.27  | 0.36 | 1 | HC_vs_MS.NoTrt_B |
| TDRD12   | 0.02143 | 1.00847 | 0.48  | 0.42 | 1 | HC_vs_MS.NoTrt_B |
| FOPNL    | 0.02146 | 0.55785 | 0.594 | 0.52 | 1 | HC_vs_MS.NoTrt_B |
| TPH2     | 0.02147 | 0.40227 | 0.632 | 0.61 | 1 | HC_vs_MS.NoTrt_B |
| PLK5     | 0.02156 | 0.65115 | 0.528 | 0.47 | 1 | HC_vs_MS.NoTrt_B |
| ZNF512   | 0.02157 | -0.4177 | 0.117 | 0.18 | 1 | HC_vs_MS.NoTrt_B |
| TC2N     | 0.02161 | -0.4019 | 0.174 | 0.24 | 1 | HC_vs_MS.NoTrt_B |
| EFCAB11  | 0.02165 | 0.37819 | 0.813 | 0.8  | 1 | HC_vs_MS.NoTrt_B |
| ZNF584   | 0.02165 | 0.52571 | 0.665 | 0.65 | 1 | HC_vs_MS.NoTrt_B |
| CNTNAP3  | 0.02169 | 0.3975  | 0.593 | 0.54 | 1 | HC_vs_MS.NoTrt_B |
| ARFGAP3  | 0.02175 | -0.3476 | 0.322 | 0.42 | 1 | HC_vs_MS.NoTrt_B |
| TRUB2    | 0.02177 | -0.282  | 0.955 | 0.98 | 1 | HC_vs_MS.NoTrt_B |
| TEX9     | 0.02182 | 0.41732 | 0.752 | 0.77 | 1 | HC_vs_MS.NoTrt_B |
| TSPAN17  | 0.02182 | -0.3232 | 0.064 | 0.11 | 1 | HC_vs_MS.NoTrt_B |
| PGD      | 0.02183 | -1.0513 | 0.078 | 0.13 | 1 | HC_vs_MS.NoTrt_B |
| RNF6     | 0.02189 | -0.5149 | 0.155 | 0.22 | 1 | HC_vs_MS.NoTrt_B |
| MLLT6    | 0.02191 | 0.50404 | 0.91  | 0.89 | 1 | HC_vs_MS.NoTrt_B |
| GZMM     | 0.02193 | -0.3558 | 0.11  | 0.17 | 1 | HC_vs_MS.NoTrt_B |
| ACVR2B   | 0.022   | 0.40771 | 0.383 | 0.49 | 1 | HC_vs_MS.NoTrt_B |
| NIPAL1   | 0.02204 | 0.44661 | 0.41  | 0.36 | 1 | HC_vs_MS.NoTrt_B |
| NQO2     | 0.0221  | 0.26002 | 0.78  | 0.77 | 1 | HC_vs_MS.NoTrt_B |
| IGSF1    | 0.02225 | 0.39138 | 0.388 | 0.31 | 1 | HC_vs_MS.NoTrt_B |
| ZNF99    | 0.02232 | 0.27633 | 0.529 | 0.46 | 1 | HC_vs_MS.NoTrt_B |
| ASB7     | 0.02233 | -0.4111 | 0.064 | 0.11 | 1 | HC_vs_MS.NoTrt_B |
| FAM227A  | 0.0224  | 0.2933  | 0.909 | 0.92 | 1 | HC_vs_MS.NoTrt_B |

|            |         |         |       |      |   |                  |
|------------|---------|---------|-------|------|---|------------------|
| TRADD      | 0.02248 | -0.4026 | 0.133 | 0.2  | 1 | HC_vs_MS.NoTrt_B |
| SLC2A8     | 0.02272 | -0.5582 | 0.259 | 0.35 | 1 | HC_vs_MS.NoTrt_B |
| FCER1G     | 0.02273 | 0.42889 | 0.674 | 0.62 | 1 | HC_vs_MS.NoTrt_B |
| TMEM120B   | 0.02274 | 0.28044 | 0.972 | 0.97 | 1 | HC_vs_MS.NoTrt_B |
| ANKRD16    | 0.02285 | 0.39364 | 0.429 | 0.36 | 1 | HC_vs_MS.NoTrt_B |
| FAM83A     | 0.02286 | 0.27883 | 0.199 | 0.13 | 1 | HC_vs_MS.NoTrt_B |
| ATP9B      | 0.02292 | 0.44028 | 0.909 | 0.93 | 1 | HC_vs_MS.NoTrt_B |
| HNMT       | 0.02293 | 0.30682 | 0.796 | 0.81 | 1 | HC_vs_MS.NoTrt_B |
| DOC2A      | 0.02294 | 0.3511  | 0.475 | 0.43 | 1 | HC_vs_MS.NoTrt_B |
| TRIP13     | 0.02302 | 0.40523 | 0.543 | 0.49 | 1 | HC_vs_MS.NoTrt_B |
| MSRA       | 0.02321 | 0.48785 | 0.239 | 0.17 | 1 | HC_vs_MS.NoTrt_B |
| RSPH10B    | 0.02326 | 0.3604  | 0.603 | 0.52 | 1 | HC_vs_MS.NoTrt_B |
| UBLCP1     | 0.02336 | -0.5076 | 0.148 | 0.21 | 1 | HC_vs_MS.NoTrt_B |
| NBPF19     | 0.02337 | 0.71218 | 0.446 | 0.36 | 1 | HC_vs_MS.NoTrt_B |
| YIPF1      | 0.02341 | -0.6199 | 0.07  | 0.12 | 1 | HC_vs_MS.NoTrt_B |
| MRPS12     | 0.02342 | -0.4176 | 0.371 | 0.47 | 1 | HC_vs_MS.NoTrt_B |
| COPS3      | 0.02343 | -0.3566 | 0.22  | 0.29 | 1 | HC_vs_MS.NoTrt_B |
| SH3BP5     | 0.0235  | 0.38253 | 0.801 | 0.75 | 1 | HC_vs_MS.NoTrt_B |
| PPIL6      | 0.02351 | 0.34568 | 0.497 | 0.45 | 1 | HC_vs_MS.NoTrt_B |
| CATSPER2   | 0.02353 | 0.47503 | 0.771 | 0.71 | 1 | HC_vs_MS.NoTrt_B |
| NCBP3      | 0.02356 | 0.43521 | 0.877 | 0.9  | 1 | HC_vs_MS.NoTrt_B |
| ARNTL      | 0.02363 | -0.4416 | 0.191 | 0.26 | 1 | HC_vs_MS.NoTrt_B |
| NCKAP1L    | 0.02379 | -0.314  | 0.761 | 0.8  | 1 | HC_vs_MS.NoTrt_B |
| BPIFB1     | 0.02381 | 0.39813 | 0.507 | 0.44 | 1 | HC_vs_MS.NoTrt_B |
| NOTCH3     | 0.02388 | 0.33292 | 0.549 | 0.47 | 1 | HC_vs_MS.NoTrt_B |
| HSPG2      | 0.02389 | -0.266  | 0.335 | 0.26 | 1 | HC_vs_MS.NoTrt_B |
| SMAD9      | 0.02395 | -0.4045 | 0.29  | 0.37 | 1 | HC_vs_MS.NoTrt_B |
| PQBP1      | 0.02398 | -0.3775 | 0.135 | 0.2  | 1 | HC_vs_MS.NoTrt_B |
| AS3MT      | 0.02401 | 0.41178 | 0.772 | 0.71 | 1 | HC_vs_MS.NoTrt_B |
| MIB1       | 0.02402 | 0.84573 | 0.101 | 0.16 | 1 | HC_vs_MS.NoTrt_B |
| E2F3       | 0.02405 | 0.38927 | 0.125 | 0.2  | 1 | HC_vs_MS.NoTrt_B |
| AL592183.1 | 0.02413 | -0.4574 | 0.078 | 0.13 | 1 | HC_vs_MS.NoTrt_B |
| SMG8       | 0.02415 | -0.4043 | 0.078 | 0.13 | 1 | HC_vs_MS.NoTrt_B |
| TEX261     | 0.02416 | -0.3147 | 0.057 | 0.1  | 1 | HC_vs_MS.NoTrt_B |
| STARD5     | 0.02417 | 1.49153 | 0.114 | 0.06 | 1 | HC_vs_MS.NoTrt_B |
| CDH13      | 0.02417 | 0.31211 | 0.732 | 0.73 | 1 | HC_vs_MS.NoTrt_B |
| TNFSF15    | 0.02419 | 0.275   | 0.583 | 0.49 | 1 | HC_vs_MS.NoTrt_B |
| ASAH1      | 0.02421 | -0.3231 | 0.678 | 0.76 | 1 | HC_vs_MS.NoTrt_B |
| ABCC3      | 0.02421 | 0.42319 | 0.804 | 0.79 | 1 | HC_vs_MS.NoTrt_B |
| PROCR      | 0.02422 | 0.34031 | 0.839 | 0.84 | 1 | HC_vs_MS.NoTrt_B |

|          |         |         |       |      |   |                  |
|----------|---------|---------|-------|------|---|------------------|
| ZNF677   | 0.02426 | 0.33807 | 0.794 | 0.76 | 1 | HC_vs_MS.NoTrt_B |
| LMNA     | 0.02428 | -0.6111 | 0.486 | 0.56 | 1 | HC_vs_MS.NoTrt_B |
| CCDC180  | 0.0244  | 0.39322 | 0.757 | 0.7  | 1 | HC_vs_MS.NoTrt_B |
| ATP5G3   | 0.02441 | -0.2613 | 0.343 | 0.42 | 1 | HC_vs_MS.NoTrt_B |
| KCTD19   | 0.0246  | 0.33841 | 0.743 | 0.69 | 1 | HC_vs_MS.NoTrt_B |
| KMT2B    | 0.02462 | 0.6801  | 0.29  | 0.22 | 1 | HC_vs_MS.NoTrt_B |
| ARPC1A   | 0.02476 | -0.7879 | 0.23  | 0.3  | 1 | HC_vs_MS.NoTrt_B |
| C2       | 0.02489 | 0.53669 | 0.696 | 0.68 | 1 | HC_vs_MS.NoTrt_B |
| C6orf203 | 0.0249  | 0.64969 | 0.599 | 0.54 | 1 | HC_vs_MS.NoTrt_B |
| TMEM69   | 0.0249  | -0.4481 | 0.197 | 0.28 | 1 | HC_vs_MS.NoTrt_B |
| ZNF451   | 0.02505 | 0.44665 | 0.758 | 0.71 | 1 | HC_vs_MS.NoTrt_B |
| CDK13    | 0.02506 | 0.2767  | 0.825 | 0.83 | 1 | HC_vs_MS.NoTrt_B |
| PSMA5    | 0.02507 | -0.2517 | 0.232 | 0.31 | 1 | HC_vs_MS.NoTrt_B |
| ARHGAP28 | 0.02509 | 0.29076 | 0.845 | 0.85 | 1 | HC_vs_MS.NoTrt_B |
| RRBP1    | 0.0251  | 0.68974 | 0.213 | 0.3  | 1 | HC_vs_MS.NoTrt_B |
| ITGA11   | 0.02511 | 0.41049 | 0.619 | 0.63 | 1 | HC_vs_MS.NoTrt_B |
| DNAAF5   | 0.02515 | 0.98781 | 0.19  | 0.12 | 1 | HC_vs_MS.NoTrt_B |
| SMIM8    | 0.02528 | 0.51333 | 0.599 | 0.52 | 1 | HC_vs_MS.NoTrt_B |
| SPDYA    | 0.02532 | 0.56868 | 0.059 | 0.11 | 1 | HC_vs_MS.NoTrt_B |
| IFIT1    | 0.02536 | 0.5596  | 0.257 | 0.18 | 1 | HC_vs_MS.NoTrt_B |
| SPINT2   | 0.0254  | -0.3903 | 0.526 | 0.44 | 1 | HC_vs_MS.NoTrt_B |
| CHMP5    | 0.02544 | -0.3249 | 0.094 | 0.15 | 1 | HC_vs_MS.NoTrt_B |
| GADD45B  | 0.02551 | -0.8596 | 0.075 | 0.12 | 1 | HC_vs_MS.NoTrt_B |
| TMC7     | 0.02552 | 0.34933 | 0.72  | 0.72 | 1 | HC_vs_MS.NoTrt_B |
| ACBD7    | 0.02553 | 0.27207 | 0.836 | 0.84 | 1 | HC_vs_MS.NoTrt_B |
| SDC3     | 0.0256  | 0.50248 | 0.268 | 0.18 | 1 | HC_vs_MS.NoTrt_B |
| VIMP     | 0.02573 | -0.5957 | 0.091 | 0.15 | 1 | HC_vs_MS.NoTrt_B |
| ZNF843   | 0.02574 | 0.27098 | 0.693 | 0.62 | 1 | HC_vs_MS.NoTrt_B |
| C4orf19  | 0.02581 | 0.33299 | 0.742 | 0.76 | 1 | HC_vs_MS.NoTrt_B |
| ARHGDI1  | 0.02597 | 0.29029 | 0.357 | 0.49 | 1 | HC_vs_MS.NoTrt_B |
| METTL16  | 0.02602 | 0.73861 | 0.759 | 0.69 | 1 | HC_vs_MS.NoTrt_B |
| ZC3H12A  | 0.02603 | -0.4067 | 0.096 | 0.15 | 1 | HC_vs_MS.NoTrt_B |
| HTN3     | 0.02617 | 0.3979  | 0.614 | 0.58 | 1 | HC_vs_MS.NoTrt_B |
| ATP7A    | 0.02624 | 1.39849 | 0.348 | 0.28 | 1 | HC_vs_MS.NoTrt_B |
| ZNF581   | 0.02634 | -0.3148 | 0.061 | 0.11 | 1 | HC_vs_MS.NoTrt_B |
| DEDD2    | 0.0264  | -0.4035 | 0.312 | 0.4  | 1 | HC_vs_MS.NoTrt_B |
| TARDBP   | 0.02647 | 0.25701 | 0.594 | 0.7  | 1 | HC_vs_MS.NoTrt_B |
| ILK      | 0.02647 | -0.2742 | 0.133 | 0.2  | 1 | HC_vs_MS.NoTrt_B |
| LRRC59   | 0.02654 | -0.3807 | 0.1   | 0.16 | 1 | HC_vs_MS.NoTrt_B |
| NUTF2    | 0.02682 | -0.7142 | 0.129 | 0.19 | 1 | HC_vs_MS.NoTrt_B |

|          |         |         |       |      |   |                  |
|----------|---------|---------|-------|------|---|------------------|
| ZNF782   | 0.02688 | 0.66385 | 0.081 | 0.14 | 1 | HC_vs_MS.NoTrt_B |
| ZNF726   | 0.02713 | 0.27761 | 0.858 | 0.84 | 1 | HC_vs_MS.NoTrt_B |
| SIN3B    | 0.02724 | 0.54694 | 0.754 | 0.74 | 1 | HC_vs_MS.NoTrt_B |
| NUDCD3   | 0.02725 | -0.4478 | 0.313 | 0.37 | 1 | HC_vs_MS.NoTrt_B |
| TCAIM    | 0.02726 | 0.47417 | 0.184 | 0.27 | 1 | HC_vs_MS.NoTrt_B |
| SFPQ     | 0.02734 | 0.36671 | 0.513 | 0.42 | 1 | HC_vs_MS.NoTrt_B |
| ABHD12B  | 0.02742 | 0.66934 | 0.614 | 0.6  | 1 | HC_vs_MS.NoTrt_B |
| TBC1D24  | 0.0275  | 0.67749 | 0.706 | 0.68 | 1 | HC_vs_MS.NoTrt_B |
| RETSAT   | 0.02761 | -0.5754 | 0.122 | 0.18 | 1 | HC_vs_MS.NoTrt_B |
| BAG6     | 0.02765 | 0.72389 | 0.622 | 0.56 | 1 | HC_vs_MS.NoTrt_B |
| RSPH10B2 | 0.02767 | 0.27623 | 0.6   | 0.52 | 1 | HC_vs_MS.NoTrt_B |
| ZRANB2   | 0.02778 | 0.25075 | 0.37  | 0.49 | 1 | HC_vs_MS.NoTrt_B |
| MNS1     | 0.0278  | 0.32739 | 0.174 | 0.11 | 1 | HC_vs_MS.NoTrt_B |
| ZFP82    | 0.02796 | 0.69631 | 0.649 | 0.6  | 1 | HC_vs_MS.NoTrt_B |
| PRAF2    | 0.02799 | -0.6578 | 0.083 | 0.14 | 1 | HC_vs_MS.NoTrt_B |
| MAP4     | 0.02804 | -0.4396 | 0.801 | 0.81 | 1 | HC_vs_MS.NoTrt_B |
| SLC25A34 | 0.02813 | 0.48477 | 0.622 | 0.56 | 1 | HC_vs_MS.NoTrt_B |
| PRDM5    | 0.02815 | 0.35147 | 0.672 | 0.67 | 1 | HC_vs_MS.NoTrt_B |
| TMEM41A  | 0.02835 | 0.3433  | 0.835 | 0.81 | 1 | HC_vs_MS.NoTrt_B |
| PAEP     | 0.02848 | 0.40903 | 0.393 | 0.34 | 1 | HC_vs_MS.NoTrt_B |
| MTO1     | 0.02856 | -0.2758 | 0.975 | 0.99 | 1 | HC_vs_MS.NoTrt_B |
| CMTM3    | 0.02873 | -0.3851 | 0.142 | 0.21 | 1 | HC_vs_MS.NoTrt_B |
| CD276    | 0.02874 | 0.28943 | 0.459 | 0.37 | 1 | HC_vs_MS.NoTrt_B |
| WIPF1    | 0.02901 | 0.26143 | 0.691 | 0.83 | 1 | HC_vs_MS.NoTrt_B |
| LHFPL5   | 0.02907 | 0.34898 | 0.528 | 0.47 | 1 | HC_vs_MS.NoTrt_B |
| ARHGEF4  | 0.02908 | 0.39488 | 0.546 | 0.47 | 1 | HC_vs_MS.NoTrt_B |
| ZNF528   | 0.02909 | 0.94002 | 0.574 | 0.51 | 1 | HC_vs_MS.NoTrt_B |
| RBM28    | 0.02913 | 0.4164  | 0.877 | 0.85 | 1 | HC_vs_MS.NoTrt_B |
| LRG1     | 0.02923 | 0.27586 | 0.755 | 0.74 | 1 | HC_vs_MS.NoTrt_B |
| TMCO3    | 0.02927 | 0.49987 | 0.716 | 0.68 | 1 | HC_vs_MS.NoTrt_B |
| DRG1     | 0.02933 | -0.415  | 0.142 | 0.21 | 1 | HC_vs_MS.NoTrt_B |
| CEP68    | 0.0294  | -0.596  | 0.516 | 0.58 | 1 | HC_vs_MS.NoTrt_B |
| SYS1     | 0.02958 | -0.368  | 0.423 | 0.52 | 1 | HC_vs_MS.NoTrt_B |
| PPFIBP2  | 0.02961 | 0.55374 | 0.251 | 0.18 | 1 | HC_vs_MS.NoTrt_B |
| ZSCAN21  | 0.02967 | 1.48351 | 0.22  | 0.15 | 1 | HC_vs_MS.NoTrt_B |
| LCLAT1   | 0.02971 | 0.34389 | 0.812 | 0.86 | 1 | HC_vs_MS.NoTrt_B |
| CHMP1B   | 0.02978 | 0.49079 | 0.775 | 0.78 | 1 | HC_vs_MS.NoTrt_B |
| ZNF468   | 0.02987 | 0.26167 | 0.494 | 0.62 | 1 | HC_vs_MS.NoTrt_B |
| ALDH6A1  | 0.0299  | -0.687  | 0.796 | 0.87 | 1 | HC_vs_MS.NoTrt_B |
| PLCB1    | 0.02992 | 0.31852 | 0.323 | 0.25 | 1 | HC_vs_MS.NoTrt_B |

|           |         |         |       |      |   |                  |
|-----------|---------|---------|-------|------|---|------------------|
| FAM228B   | 0.02993 | 0.26746 | 0.945 | 0.95 | 1 | HC_vs_MS.NoTrt_B |
| ZNF83     | 0.03    | 0.54496 | 0.849 | 0.83 | 1 | HC_vs_MS.NoTrt_B |
| MUT       | 0.03006 | -0.3471 | 0.058 | 0.1  | 1 | HC_vs_MS.NoTrt_B |
| ZBTB3     | 0.03008 | 0.42412 | 0.793 | 0.74 | 1 | HC_vs_MS.NoTrt_B |
| APMAP     | 0.03013 | -0.3437 | 0.119 | 0.18 | 1 | HC_vs_MS.NoTrt_B |
| ITSN1     | 0.03021 | 0.57511 | 0.859 | 0.85 | 1 | HC_vs_MS.NoTrt_B |
| HCFC1R1   | 0.03023 | -0.3937 | 0.058 | 0.1  | 1 | HC_vs_MS.NoTrt_B |
| CCL22     | 0.03023 | 0.2642  | 0.741 | 0.75 | 1 | HC_vs_MS.NoTrt_B |
| WDR18     | 0.03024 | -0.2515 | 0.078 | 0.13 | 1 | HC_vs_MS.NoTrt_B |
| FAM161A   | 0.03032 | -0.6511 | 0.614 | 0.76 | 1 | HC_vs_MS.NoTrt_B |
| SEC14L6   | 0.03035 | 0.37638 | 0.723 | 0.71 | 1 | HC_vs_MS.NoTrt_B |
| ATP5L2    | 0.03046 | 0.37947 | 0.303 | 0.23 | 1 | HC_vs_MS.NoTrt_B |
| PTS       | 0.03082 | -0.3269 | 0.062 | 0.11 | 1 | HC_vs_MS.NoTrt_B |
| ASAP1     | 0.03082 | 0.46871 | 0.146 | 0.09 | 1 | HC_vs_MS.NoTrt_B |
| GPLD1     | 0.0309  | 0.67885 | 0.684 | 0.63 | 1 | HC_vs_MS.NoTrt_B |
| NFIC      | 0.03096 | 0.8456  | 0.412 | 0.34 | 1 | HC_vs_MS.NoTrt_B |
| MBTD1     | 0.03116 | 0.84035 | 0.429 | 0.35 | 1 | HC_vs_MS.NoTrt_B |
| ZNF154    | 0.03122 | 1.23936 | 0.684 | 0.69 | 1 | HC_vs_MS.NoTrt_B |
| CSNK1G2   | 0.03127 | -0.7562 | 0.062 | 0.11 | 1 | HC_vs_MS.NoTrt_B |
| COQ6      | 0.03153 | 0.31778 | 0.761 | 0.71 | 1 | HC_vs_MS.NoTrt_B |
| HDAC7     | 0.03155 | 0.47956 | 0.286 | 0.21 | 1 | HC_vs_MS.NoTrt_B |
| ABCC2     | 0.03174 | 0.6727  | 0.536 | 0.51 | 1 | HC_vs_MS.NoTrt_B |
| ANGPT4    | 0.03175 | 0.36621 | 0.396 | 0.33 | 1 | HC_vs_MS.NoTrt_B |
| TSSC4     | 0.03178 | -0.2603 | 0.104 | 0.16 | 1 | HC_vs_MS.NoTrt_B |
| PIGT      | 0.03185 | -0.4234 | 0.08  | 0.13 | 1 | HC_vs_MS.NoTrt_B |
| C9orf142  | 0.03196 | -0.2757 | 0.207 | 0.28 | 1 | HC_vs_MS.NoTrt_B |
| PCYOX1L   | 0.032   | -0.3966 | 0.062 | 0.11 | 1 | HC_vs_MS.NoTrt_B |
| SLC15A2   | 0.032   | -0.5065 | 0.486 | 0.61 | 1 | HC_vs_MS.NoTrt_B |
| TNFRSF13C | 0.03203 | 0.67178 | 0.62  | 0.58 | 1 | HC_vs_MS.NoTrt_B |
| ARID1B    | 0.03221 | 0.53572 | 0.946 | 0.94 | 1 | HC_vs_MS.NoTrt_B |
| SLC12A4   | 0.0323  | 0.74732 | 0.19  | 0.12 | 1 | HC_vs_MS.NoTrt_B |
| DCAF12    | 0.03232 | -0.634  | 0.09  | 0.14 | 1 | HC_vs_MS.NoTrt_B |
| GTF2F1    | 0.0325  | -0.7387 | 0.268 | 0.34 | 1 | HC_vs_MS.NoTrt_B |
| FAM53C    | 0.03258 | 0.35364 | 0.786 | 0.78 | 1 | HC_vs_MS.NoTrt_B |
| SFMBT2    | 0.0326  | 1.09799 | 0.293 | 0.23 | 1 | HC_vs_MS.NoTrt_B |
| C11orf49  | 0.03266 | 0.33483 | 0.755 | 0.75 | 1 | HC_vs_MS.NoTrt_B |
| USP32     | 0.03283 | 0.45684 | 0.219 | 0.29 | 1 | HC_vs_MS.NoTrt_B |
| LHPP      | 0.03284 | -0.4116 | 0.11  | 0.17 | 1 | HC_vs_MS.NoTrt_B |
| ETV3      | 0.0329  | 1.0659  | 0.12  | 0.07 | 1 | HC_vs_MS.NoTrt_B |
| POLR2C    | 0.03293 | -0.4607 | 0.552 | 0.63 | 1 | HC_vs_MS.NoTrt_B |



|         |         |         |       |      |   |                  |
|---------|---------|---------|-------|------|---|------------------|
| NPRL3   | 0.03302 | 0.47677 | 0.299 | 0.39 | 1 | HC_vs_MS.NoTrt_B |
| CKAP2   | 0.03309 | -0.4979 | 0.103 | 0.16 | 1 | HC_vs_MS.NoTrt_B |
| FOXO3   | 0.03309 | -0.3579 | 0.365 | 0.43 | 1 | HC_vs_MS.NoTrt_B |
| RFX5    | 0.03315 | -0.3924 | 0.281 | 0.35 | 1 | HC_vs_MS.NoTrt_B |
| TMBIM1  | 0.0332  | -0.4719 | 0.588 | 0.64 | 1 | HC_vs_MS.NoTrt_B |
| ACAT2   | 0.03328 | -0.2932 | 0.22  | 0.29 | 1 | HC_vs_MS.NoTrt_B |
| THAP4   | 0.03331 | -0.3308 | 0.106 | 0.16 | 1 | HC_vs_MS.NoTrt_B |
| ROBO1   | 0.0334  | 0.41988 | 0.48  | 0.42 | 1 | HC_vs_MS.NoTrt_B |
| SIM2    | 0.03348 | 0.34693 | 0.617 | 0.59 | 1 | HC_vs_MS.NoTrt_B |
| MRPS18A | 0.03356 | -0.3062 | 0.097 | 0.15 | 1 | HC_vs_MS.NoTrt_B |
| GRIK2   | 0.03357 | 0.27086 | 0.532 | 0.47 | 1 | HC_vs_MS.NoTrt_B |
| TRMT1   | 0.03375 | -0.3752 | 0.129 | 0.19 | 1 | HC_vs_MS.NoTrt_B |
| HIF1AN  | 0.03396 | -0.3427 | 0.78  | 0.88 | 1 | HC_vs_MS.NoTrt_B |
| WWC3    | 0.03398 | 0.30084 | 0.345 | 0.44 | 1 | HC_vs_MS.NoTrt_B |
| ZFP36L1 | 0.03412 | 0.49292 | 0.701 | 0.69 | 1 | HC_vs_MS.NoTrt_B |
| LTBR    | 0.03417 | 0.2701  | 0.929 | 0.95 | 1 | HC_vs_MS.NoTrt_B |
| NFATC3  | 0.03429 | 0.55409 | 0.668 | 0.58 | 1 | HC_vs_MS.NoTrt_B |
| DOK6    | 0.03449 | -0.4131 | 0.258 | 0.19 | 1 | HC_vs_MS.NoTrt_B |
| NPC2    | 0.03455 | -0.4022 | 0.084 | 0.14 | 1 | HC_vs_MS.NoTrt_B |
| TMEM243 | 0.0346  | 0.28133 | 0.255 | 0.36 | 1 | HC_vs_MS.NoTrt_B |
| POLD1   | 0.0346  | -0.4824 | 0.141 | 0.2  | 1 | HC_vs_MS.NoTrt_B |
| ZNF696  | 0.03462 | 0.4671  | 0.316 | 0.25 | 1 | HC_vs_MS.NoTrt_B |
| TMPRSS7 | 0.03467 | 0.36692 | 0.257 | 0.19 | 1 | HC_vs_MS.NoTrt_B |
| CCNT2   | 0.0347  | 0.33171 | 0.133 | 0.2  | 1 | HC_vs_MS.NoTrt_B |
| BCL11B  | 0.03483 | 0.63791 | 0.493 | 0.43 | 1 | HC_vs_MS.NoTrt_B |
| CHKB    | 0.03484 | -0.3808 | 0.186 | 0.25 | 1 | HC_vs_MS.NoTrt_B |
| NCKAP5L | 0.03485 | 0.75997 | 0.593 | 0.53 | 1 | HC_vs_MS.NoTrt_B |
| PLAUR   | 0.03489 | 0.29128 | 0.574 | 0.52 | 1 | HC_vs_MS.NoTrt_B |
| CHID1   | 0.03491 | 0.67311 | 0.314 | 0.24 | 1 | HC_vs_MS.NoTrt_B |
| DPY19L3 | 0.03492 | 0.35067 | 0.913 | 0.92 | 1 | HC_vs_MS.NoTrt_B |
| TIPRL   | 0.03502 | -0.5403 | 0.281 | 0.34 | 1 | HC_vs_MS.NoTrt_B |
| EPN2    | 0.03502 | 0.37628 | 0.771 | 0.81 | 1 | HC_vs_MS.NoTrt_B |
| GIGYF2  | 0.03505 | 0.3339  | 0.91  | 0.92 | 1 | HC_vs_MS.NoTrt_B |
| RBMX2   | 0.03527 | -0.2693 | 0.091 | 0.15 | 1 | HC_vs_MS.NoTrt_B |
| FILIP1L | 0.03534 | 0.54828 | 0.39  | 0.33 | 1 | HC_vs_MS.NoTrt_B |
| CYP2R1  | 0.03539 | -0.6039 | 0.081 | 0.13 | 1 | HC_vs_MS.NoTrt_B |
| PXMP4   | 0.03547 | 0.3231  | 0.816 | 0.82 | 1 | HC_vs_MS.NoTrt_B |
| GPR157  | 0.03559 | 0.31565 | 0.786 | 0.81 | 1 | HC_vs_MS.NoTrt_B |
| CCDC69  | 0.03567 | 0.33604 | 0.859 | 0.83 | 1 | HC_vs_MS.NoTrt_B |
| POC5    | 0.03567 | -0.4895 | 0.081 | 0.13 | 1 | HC_vs_MS.NoTrt_B |

|         |         |         |       |      |   |                  |
|---------|---------|---------|-------|------|---|------------------|
| PAWR    | 0.03574 | 0.3487  | 0.699 | 0.66 | 1 | HC_vs_MS.NoTrt_B |
| S1PR3   | 0.03581 | 0.29355 | 0.757 | 0.7  | 1 | HC_vs_MS.NoTrt_B |
| ORAOV1  | 0.03584 | 0.27222 | 0.694 | 0.64 | 1 | HC_vs_MS.NoTrt_B |
| SOX5    | 0.03584 | 0.30121 | 0.174 | 0.11 | 1 | HC_vs_MS.NoTrt_B |
| PI16    | 0.0359  | -0.6128 | 0.113 | 0.17 | 1 | HC_vs_MS.NoTrt_B |
| NPC1L1  | 0.03593 | 0.28863 | 0.175 | 0.12 | 1 | HC_vs_MS.NoTrt_B |
| SLMAP   | 0.03626 | 0.338   | 0.791 | 0.77 | 1 | HC_vs_MS.NoTrt_B |
| KDM5B   | 0.03629 | 0.94349 | 0.277 | 0.37 | 1 | HC_vs_MS.NoTrt_B |
| MBD5    | 0.03632 | 0.563   | 0.843 | 0.88 | 1 | HC_vs_MS.NoTrt_B |
| TMC8    | 0.03639 | 0.49188 | 0.748 | 0.72 | 1 | HC_vs_MS.NoTrt_B |
| DHX34   | 0.03649 | -0.6027 | 0.059 | 0.1  | 1 | HC_vs_MS.NoTrt_B |
| POLE2   | 0.03659 | 0.51401 | 0.322 | 0.25 | 1 | HC_vs_MS.NoTrt_B |
| TOP1    | 0.03661 | -0.2891 | 0.129 | 0.19 | 1 | HC_vs_MS.NoTrt_B |
| SGSM2   | 0.03666 | 1.54937 | 0.264 | 0.2  | 1 | HC_vs_MS.NoTrt_B |
| CDC37L1 | 0.03686 | -0.4523 | 0.099 | 0.15 | 1 | HC_vs_MS.NoTrt_B |
| CEP152  | 0.03696 | 0.79932 | 0.683 | 0.67 | 1 | HC_vs_MS.NoTrt_B |
| DCBLD2  | 0.03697 | 0.52756 | 0.67  | 0.7  | 1 | HC_vs_MS.NoTrt_B |
| PPP2R5D | 0.03704 | -0.2628 | 0.148 | 0.21 | 1 | HC_vs_MS.NoTrt_B |
| ARV1    | 0.03742 | -0.6698 | 0.232 | 0.31 | 1 | HC_vs_MS.NoTrt_B |
| GPR68   | 0.03743 | -0.5185 | 0.068 | 0.11 | 1 | HC_vs_MS.NoTrt_B |
| GAB1    | 0.03749 | 0.3331  | 0.532 | 0.47 | 1 | HC_vs_MS.NoTrt_B |
| YLPM1   | 0.03763 | 0.79515 | 0.6   | 0.54 | 1 | HC_vs_MS.NoTrt_B |
| LAIR2   | 0.03769 | -0.5152 | 0.103 | 0.16 | 1 | HC_vs_MS.NoTrt_B |
| KLHL18  | 0.03779 | -0.572  | 0.314 | 0.39 | 1 | HC_vs_MS.NoTrt_B |
| RHOC    | 0.0378  | -0.8816 | 0.074 | 0.12 | 1 | HC_vs_MS.NoTrt_B |
| GLO1    | 0.03784 | -0.3095 | 0.064 | 0.11 | 1 | HC_vs_MS.NoTrt_B |
| POLN    | 0.0379  | 0.26886 | 0.636 | 0.6  | 1 | HC_vs_MS.NoTrt_B |
| DNAJC28 | 0.03799 | 0.50874 | 0.374 | 0.29 | 1 | HC_vs_MS.NoTrt_B |
| CRADD   | 0.03805 | -0.5043 | 0.077 | 0.12 | 1 | HC_vs_MS.NoTrt_B |
| SLC35F2 | 0.03807 | -0.313  | 0.219 | 0.28 | 1 | HC_vs_MS.NoTrt_B |
| FMR1    | 0.03813 | 0.44391 | 0.103 | 0.16 | 1 | HC_vs_MS.NoTrt_B |
| ZNF816  | 0.03846 | 0.59624 | 0.407 | 0.5  | 1 | HC_vs_MS.NoTrt_B |
| RBMS2   | 0.03861 | 0.38904 | 0.861 | 0.85 | 1 | HC_vs_MS.NoTrt_B |
| GP2     | 0.03863 | 0.36133 | 0.504 | 0.47 | 1 | HC_vs_MS.NoTrt_B |
| ELMO2   | 0.03864 | -0.4919 | 0.203 | 0.27 | 1 | HC_vs_MS.NoTrt_B |
| PTH2R   | 0.03868 | 0.34208 | 0.194 | 0.14 | 1 | HC_vs_MS.NoTrt_B |
| KCNE3   | 0.03873 | 0.34717 | 0.525 | 0.47 | 1 | HC_vs_MS.NoTrt_B |
| MYH7B   | 0.03888 | -0.4034 | 0.786 | 0.78 | 1 | HC_vs_MS.NoTrt_B |
| LRRC27  | 0.03888 | 0.45576 | 0.803 | 0.81 | 1 | HC_vs_MS.NoTrt_B |
| FAM216A | 0.03889 | 0.73165 | 0.558 | 0.51 | 1 | HC_vs_MS.NoTrt_B |

|            |         |         |       |      |   |                  |
|------------|---------|---------|-------|------|---|------------------|
| TOLLIP     | 0.0389  | -0.3611 | 0.077 | 0.12 | 1 | HC_vs_MS.NoTrt_B |
| ERCC3      | 0.03902 | -0.9704 | 0.361 | 0.43 | 1 | HC_vs_MS.NoTrt_B |
| FAM153C    | 0.03906 | 0.28617 | 0.455 | 0.39 | 1 | HC_vs_MS.NoTrt_B |
| C1S        | 0.03917 | 0.30201 | 0.63  | 0.6  | 1 | HC_vs_MS.NoTrt_B |
| GRAMD2     | 0.03927 | 0.30271 | 0.617 | 0.56 | 1 | HC_vs_MS.NoTrt_B |
| SSSCA1     | 0.03932 | -0.401  | 0.059 | 0.1  | 1 | HC_vs_MS.NoTrt_B |
| PRDM15     | 0.03939 | -0.2632 | 0.523 | 0.64 | 1 | HC_vs_MS.NoTrt_B |
| NPHP1      | 0.03942 | 0.33942 | 0.719 | 0.67 | 1 | HC_vs_MS.NoTrt_B |
| ARID2      | 0.03946 | 0.29627 | 0.688 | 0.74 | 1 | HC_vs_MS.NoTrt_B |
| RP11-235E1 | 0.03957 | 0.42846 | 0.265 | 0.2  | 1 | HC_vs_MS.NoTrt_B |
| ANO10      | 0.03972 | -0.4533 | 0.568 | 0.51 | 1 | HC_vs_MS.NoTrt_B |
| PORCN      | 0.03983 | -0.806  | 0.061 | 0.1  | 1 | HC_vs_MS.NoTrt_B |
| STARD3NL   | 0.03989 | 0.2828  | 0.775 | 0.76 | 1 | HC_vs_MS.NoTrt_B |
| XAF1       | 0.0401  | 0.28104 | 0.848 | 0.82 | 1 | HC_vs_MS.NoTrt_B |
| TBC1D13    | 0.04044 | 0.41005 | 0.109 | 0.16 | 1 | HC_vs_MS.NoTrt_B |
| RCC1       | 0.04048 | -0.3869 | 0.159 | 0.23 | 1 | HC_vs_MS.NoTrt_B |
| PDIA5      | 0.04054 | 0.25115 | 0.367 | 0.29 | 1 | HC_vs_MS.NoTrt_B |
| TRAF6      | 0.04055 | 0.89361 | 0.712 | 0.65 | 1 | HC_vs_MS.NoTrt_B |
| HDAC3      | 0.04055 | -0.4518 | 0.117 | 0.17 | 1 | HC_vs_MS.NoTrt_B |
| RP1L1      | 0.04068 | 0.32006 | 0.6   | 0.52 | 1 | HC_vs_MS.NoTrt_B |
| WNT7A      | 0.0407  | 1.02631 | 0.103 | 0.05 | 1 | HC_vs_MS.NoTrt_B |
| RP11-47I22 | 0.04077 | 0.47278 | 0.596 | 0.58 | 1 | HC_vs_MS.NoTrt_B |
| IRAK3      | 0.04081 | 0.8775  | 0.413 | 0.37 | 1 | HC_vs_MS.NoTrt_B |
| ISPD       | 0.04084 | 0.25063 | 0.787 | 0.78 | 1 | HC_vs_MS.NoTrt_B |
| AP5B1      | 0.04114 | 0.73405 | 0.235 | 0.17 | 1 | HC_vs_MS.NoTrt_B |
| C17orf99   | 0.04119 | 0.2931  | 0.403 | 0.35 | 1 | HC_vs_MS.NoTrt_B |
| NDUFA9     | 0.04132 | -0.2752 | 0.868 | 0.92 | 1 | HC_vs_MS.NoTrt_B |
| TKT        | 0.04132 | -0.297  | 0.557 | 0.61 | 1 | HC_vs_MS.NoTrt_B |
| SNAP47     | 0.04137 | -0.6654 | 0.12  | 0.17 | 1 | HC_vs_MS.NoTrt_B |
| SCRN2      | 0.04172 | -0.3687 | 0.064 | 0.11 | 1 | HC_vs_MS.NoTrt_B |
| NOG        | 0.04173 | 1.41208 | 0.241 | 0.19 | 1 | HC_vs_MS.NoTrt_B |
| KLRB1      | 0.04178 | -0.302  | 0.081 | 0.13 | 1 | HC_vs_MS.NoTrt_B |
| EIF4E3     | 0.04181 | 0.84132 | 0.18  | 0.26 | 1 | HC_vs_MS.NoTrt_B |
| FAM92A1    | 0.04194 | 0.48161 | 0.323 | 0.26 | 1 | HC_vs_MS.NoTrt_B |
| PLA2G2D    | 0.04195 | 0.31973 | 0.426 | 0.37 | 1 | HC_vs_MS.NoTrt_B |
| WNT4       | 0.04199 | 0.58098 | 0.075 | 0.12 | 1 | HC_vs_MS.NoTrt_B |
| AGPAT5     | 0.04206 | 0.77352 | 0.141 | 0.09 | 1 | HC_vs_MS.NoTrt_B |
| STT3B      | 0.04207 | 0.37892 | 0.561 | 0.51 | 1 | HC_vs_MS.NoTrt_B |
| TMEM5      | 0.04212 | 0.94359 | 0.497 | 0.45 | 1 | HC_vs_MS.NoTrt_B |
| CCDC150    | 0.04216 | 0.36215 | 0.672 | 0.7  | 1 | HC_vs_MS.NoTrt_B |

|           |         |         |       |      |   |                  |
|-----------|---------|---------|-------|------|---|------------------|
| CASS4     | 0.04217 | 0.46171 | 0.454 | 0.39 | 1 | HC_vs_MS.NoTrt_B |
| ID3       | 0.0422  | 0.71943 | 0.222 | 0.16 | 1 | HC_vs_MS.NoTrt_B |
| TBC1D5    | 0.04226 | -0.2861 | 0.597 | 0.68 | 1 | HC_vs_MS.NoTrt_B |
| ALKBH2    | 0.04239 | -0.3026 | 0.307 | 0.39 | 1 | HC_vs_MS.NoTrt_B |
| SMN2      | 0.04251 | 0.38645 | 0.807 | 0.7  | 1 | HC_vs_MS.NoTrt_B |
| SPAG9     | 0.04261 | 0.46411 | 0.862 | 0.87 | 1 | HC_vs_MS.NoTrt_B |
| GIMAP5    | 0.04263 | 0.47114 | 0.478 | 0.41 | 1 | HC_vs_MS.NoTrt_B |
| ZNF365    | 0.04266 | -0.6074 | 0.27  | 0.35 | 1 | HC_vs_MS.NoTrt_B |
| ING4      | 0.04276 | -0.4062 | 0.241 | 0.31 | 1 | HC_vs_MS.NoTrt_B |
| CITED2    | 0.04276 | 1.26055 | 0.139 | 0.09 | 1 | HC_vs_MS.NoTrt_B |
| MTRNR2L3  | 0.04281 | -0.3825 | 0.229 | 0.17 | 1 | HC_vs_MS.NoTrt_B |
| DDX51     | 0.04293 | 0.33899 | 0.645 | 0.6  | 1 | HC_vs_MS.NoTrt_B |
| SLC24A2   | 0.04294 | 0.29538 | 0.636 | 0.6  | 1 | HC_vs_MS.NoTrt_B |
| PSME3     | 0.04313 | -0.44   | 0.601 | 0.69 | 1 | HC_vs_MS.NoTrt_B |
| ZIM3      | 0.0432  | 0.31824 | 0.529 | 0.5  | 1 | HC_vs_MS.NoTrt_B |
| SPATA31A7 | 0.04352 | 0.34873 | 0.533 | 0.45 | 1 | HC_vs_MS.NoTrt_B |
| NBPF14    | 0.04355 | 0.38517 | 0.41  | 0.33 | 1 | HC_vs_MS.NoTrt_B |
| XKR9      | 0.04356 | 0.50441 | 0.559 | 0.56 | 1 | HC_vs_MS.NoTrt_B |
| GSDMA     | 0.04359 | 0.67905 | 0.601 | 0.58 | 1 | HC_vs_MS.NoTrt_B |
| ZNF614    | 0.04368 | 1.56508 | 0.252 | 0.18 | 1 | HC_vs_MS.NoTrt_B |
| PITPNM2   | 0.04389 | 1.11626 | 0.422 | 0.37 | 1 | HC_vs_MS.NoTrt_B |
| PRICKLE3  | 0.04391 | 0.43717 | 0.51  | 0.45 | 1 | HC_vs_MS.NoTrt_B |
| GTF2I     | 0.04405 | 0.7216  | 0.887 | 0.88 | 1 | HC_vs_MS.NoTrt_B |
| PADI4     | 0.04408 | 0.52941 | 0.512 | 0.49 | 1 | HC_vs_MS.NoTrt_B |
| PICALM    | 0.04411 | 0.32138 | 0.22  | 0.31 | 1 | HC_vs_MS.NoTrt_B |
| WDR70     | 0.04421 | -0.4166 | 0.264 | 0.35 | 1 | HC_vs_MS.NoTrt_B |
| FRMD4A    | 0.04432 | 0.5779  | 0.629 | 0.58 | 1 | HC_vs_MS.NoTrt_B |
| NAIF1     | 0.04466 | 0.38218 | 0.588 | 0.54 | 1 | HC_vs_MS.NoTrt_B |
| GEMIN4    | 0.04473 | -0.2919 | 0.061 | 0.1  | 1 | HC_vs_MS.NoTrt_B |
| PSMD2     | 0.04483 | -0.2957 | 0.149 | 0.21 | 1 | HC_vs_MS.NoTrt_B |
| CRIP1     | 0.04498 | 0.54772 | 0.18  | 0.25 | 1 | HC_vs_MS.NoTrt_B |
| RADIL     | 0.04507 | 0.38944 | 0.281 | 0.21 | 1 | HC_vs_MS.NoTrt_B |
| RARA      | 0.04509 | -0.5778 | 0.074 | 0.12 | 1 | HC_vs_MS.NoTrt_B |
| DDX19B    | 0.04547 | -1.0849 | 0.432 | 0.48 | 1 | HC_vs_MS.NoTrt_B |
| MRPL42    | 0.0455  | 0.28689 | 0.964 | 0.98 | 1 | HC_vs_MS.NoTrt_B |
| PPP1R21   | 0.04557 | 0.25854 | 0.203 | 0.27 | 1 | HC_vs_MS.NoTrt_B |
| GNG7      | 0.04559 | 0.70644 | 0.394 | 0.35 | 1 | HC_vs_MS.NoTrt_B |
| RCOR1     | 0.0456  | 0.41658 | 0.13  | 0.19 | 1 | HC_vs_MS.NoTrt_B |
| CALM3     | 0.04574 | 0.34781 | 0.43  | 0.57 | 1 | HC_vs_MS.NoTrt_B |
| PISD      | 0.04587 | -0.3115 | 0.119 | 0.17 | 1 | HC_vs_MS.NoTrt_B |

|           |         |         |       |      |   |                  |
|-----------|---------|---------|-------|------|---|------------------|
| PIK3R1    | 0.04593 | 0.78081 | 0.31  | 0.24 | 1 | HC_vs_MS.NoTrt_B |
| RAB11FIP4 | 0.0461  | -0.571  | 0.687 | 0.75 | 1 | HC_vs_MS.NoTrt_B |
| TBCC      | 0.04614 | -0.3878 | 0.364 | 0.43 | 1 | HC_vs_MS.NoTrt_B |
| UBE2O     | 0.04624 | 0.45106 | 0.545 | 0.49 | 1 | HC_vs_MS.NoTrt_B |
| GALR1     | 0.04626 | 0.35232 | 0.616 | 0.58 | 1 | HC_vs_MS.NoTrt_B |
| NF2       | 0.04628 | -0.2502 | 0.762 | 0.81 | 1 | HC_vs_MS.NoTrt_B |
| VASH2     | 0.04633 | 0.46463 | 0.745 | 0.71 | 1 | HC_vs_MS.NoTrt_B |
| RAD54L2   | 0.04646 | -0.3151 | 0.61  | 0.68 | 1 | HC_vs_MS.NoTrt_B |
| CCDC59    | 0.04667 | -0.2799 | 0.114 | 0.17 | 1 | HC_vs_MS.NoTrt_B |
| GATC      | 0.0467  | 0.42064 | 0.559 | 0.67 | 1 | HC_vs_MS.NoTrt_B |
| CSMD3     | 0.04675 | 0.33719 | 0.458 | 0.39 | 1 | HC_vs_MS.NoTrt_B |
| DYNLL2    | 0.0469  | 0.36895 | 0.091 | 0.14 | 1 | HC_vs_MS.NoTrt_B |
| PNPLA3    | 0.04697 | 0.32466 | 0.53  | 0.49 | 1 | HC_vs_MS.NoTrt_B |
| RASA4B    | 0.04703 | 0.38081 | 0.436 | 0.52 | 1 | HC_vs_MS.NoTrt_B |
| INO80E    | 0.04717 | 0.54631 | 0.158 | 0.23 | 1 | HC_vs_MS.NoTrt_B |
| PPARA     | 0.04719 | 0.52236 | 0.904 | 0.91 | 1 | HC_vs_MS.NoTrt_B |
| RCBTB2    | 0.04721 | -0.8283 | 0.1   | 0.15 | 1 | HC_vs_MS.NoTrt_B |
| SH3GLB2   | 0.04734 | 0.75392 | 0.152 | 0.1  | 1 | HC_vs_MS.NoTrt_B |
| TRAPPC3L  | 0.04767 | 0.41675 | 0.572 | 0.58 | 1 | HC_vs_MS.NoTrt_B |
| MACF1     | 0.04777 | 0.53954 | 0.871 | 0.84 | 1 | HC_vs_MS.NoTrt_B |
| BBIP1     | 0.0478  | 0.28088 | 0.529 | 0.61 | 1 | HC_vs_MS.NoTrt_B |
| FAM179B   | 0.04795 | 0.27741 | 0.757 | 0.77 | 1 | HC_vs_MS.NoTrt_B |
| HCN1      | 0.04799 | 0.25344 | 0.361 | 0.29 | 1 | HC_vs_MS.NoTrt_B |
| CD82      | 0.04808 | -0.374  | 0.614 | 0.68 | 1 | HC_vs_MS.NoTrt_B |
| VSNL1     | 0.04822 | 0.29847 | 0.593 | 0.57 | 1 | HC_vs_MS.NoTrt_B |
| SCARF1    | 0.04827 | 0.26548 | 0.361 | 0.29 | 1 | HC_vs_MS.NoTrt_B |
| ZNF674    | 0.04847 | 0.31403 | 0.904 | 0.9  | 1 | HC_vs_MS.NoTrt_B |
| ABCG5     | 0.04849 | -0.2744 | 0.171 | 0.24 | 1 | HC_vs_MS.NoTrt_B |
| URI1      | 0.04851 | 0.58107 | 0.187 | 0.13 | 1 | HC_vs_MS.NoTrt_B |
| UPF2      | 0.04863 | -0.539  | 0.246 | 0.32 | 1 | HC_vs_MS.NoTrt_B |
| RASEF     | 0.04877 | 0.34084 | 0.868 | 0.96 | 1 | HC_vs_MS.NoTrt_B |
| LARP4     | 0.04886 | 0.45218 | 0.358 | 0.43 | 1 | HC_vs_MS.NoTrt_B |
| TRIM6     | 0.04909 | 0.38489 | 0.522 | 0.47 | 1 | HC_vs_MS.NoTrt_B |
| C19orf60  | 0.0491  | -0.2576 | 0.865 | 0.91 | 1 | HC_vs_MS.NoTrt_B |
| SNAPC3    | 0.04928 | 0.57218 | 0.586 | 0.55 | 1 | HC_vs_MS.NoTrt_B |
| ZNF490    | 0.04933 | -0.3834 | 0.865 | 0.87 | 1 | HC_vs_MS.NoTrt_B |
| ZC3H10    | 0.04935 | 0.56695 | 0.507 | 0.48 | 1 | HC_vs_MS.NoTrt_B |
| TMX2      | 0.04953 | -0.2808 | 0.104 | 0.16 | 1 | HC_vs_MS.NoTrt_B |
| ZNF577    | 0.04962 | 0.49613 | 0.332 | 0.43 | 1 | HC_vs_MS.NoTrt_B |
| FGD4      | 0.04971 | 0.28479 | 0.82  | 0.83 | 1 | HC_vs_MS.NoTrt_B |

|            |         |         |       |      |   |                  |
|------------|---------|---------|-------|------|---|------------------|
| ICMT       | 0.04974 | 0.67605 | 0.609 | 0.55 | 1 | HC_vs_MS.NoTrt_B |
| OSBPL1A    | 0.0498  | 0.27156 | 0.736 | 0.71 | 1 | HC_vs_MS.NoTrt_B |
| PPOX       | 0.04983 | -0.4488 | 0.216 | 0.28 | 1 | HC_vs_MS.NoTrt_B |
| MYH3       | 0.05001 | 0.38708 | 0.645 | 0.63 | 1 | HC_vs_MS.NoTrt_B |
| NCK1       | 0.05003 | 0.3519  | 0.364 | 0.48 | 1 | HC_vs_MS.NoTrt_B |
| PPP1R3B    | 0.05003 | -0.2695 | 0.291 | 0.22 | 1 | HC_vs_MS.NoTrt_B |
| C19orf66   | 0.05026 | -0.3513 | 0.616 | 0.67 | 1 | HC_vs_MS.NoTrt_B |
| EXPH5      | 0.05027 | 0.7144  | 0.7   | 0.71 | 1 | HC_vs_MS.NoTrt_B |
| PPP2R5E    | 0.05034 | 0.54109 | 0.188 | 0.27 | 1 | HC_vs_MS.NoTrt_B |
| ZNF114     | 0.05041 | 0.36893 | 0.471 | 0.43 | 1 | HC_vs_MS.NoTrt_B |
| CELF1      | 0.05042 | -0.2618 | 0.367 | 0.44 | 1 | HC_vs_MS.NoTrt_B |
| SURF1      | 0.0505  | -0.2819 | 0.07  | 0.11 | 1 | HC_vs_MS.NoTrt_B |
| SAMD15     | 0.05066 | 0.41514 | 0.323 | 0.25 | 1 | HC_vs_MS.NoTrt_B |
| RBM19      | 0.05079 | -0.2567 | 0.467 | 0.54 | 1 | HC_vs_MS.NoTrt_B |
| TIA1       | 0.05083 | 0.2511  | 0.216 | 0.29 | 1 | HC_vs_MS.NoTrt_B |
| ELF3       | 0.05088 | 0.60179 | 0.545 | 0.5  | 1 | HC_vs_MS.NoTrt_B |
| SLC27A1    | 0.05096 | 0.57409 | 0.797 | 0.84 | 1 | HC_vs_MS.NoTrt_B |
| BCL9L      | 0.05097 | 0.81201 | 0.17  | 0.11 | 1 | HC_vs_MS.NoTrt_B |
| PGAM5      | 0.051   | 0.30238 | 0.714 | 0.65 | 1 | HC_vs_MS.NoTrt_B |
| HLA-DRB5   | 0.05101 | -2.5348 | 0.087 | 0.13 | 1 | HC_vs_MS.NoTrt_B |
| ZSCAN25    | 0.05105 | 0.57523 | 0.433 | 0.36 | 1 | HC_vs_MS.NoTrt_B |
| DNAH7      | 0.0516  | 0.53577 | 0.657 | 0.61 | 1 | HC_vs_MS.NoTrt_B |
| POU2F3     | 0.05171 | 0.35683 | 0.426 | 0.37 | 1 | HC_vs_MS.NoTrt_B |
| GMPPA      | 0.05179 | -0.6151 | 0.236 | 0.31 | 1 | HC_vs_MS.NoTrt_B |
| THTPA      | 0.05182 | -0.2845 | 0.08  | 0.12 | 1 | HC_vs_MS.NoTrt_B |
| DHRS7B     | 0.05187 | 0.44488 | 0.516 | 0.47 | 1 | HC_vs_MS.NoTrt_B |
| RP11-1070B | 0.05188 | 0.92993 | 0.186 | 0.13 | 1 | HC_vs_MS.NoTrt_B |
| MATN2      | 0.05194 | 0.48424 | 0.58  | 0.56 | 1 | HC_vs_MS.NoTrt_B |
| MED8       | 0.05204 | -0.4678 | 0.067 | 0.11 | 1 | HC_vs_MS.NoTrt_B |
| KBTBD6     | 0.05213 | -0.42   | 0.325 | 0.43 | 1 | HC_vs_MS.NoTrt_B |
| DGKD       | 0.05224 | 1.02367 | 0.604 | 0.57 | 1 | HC_vs_MS.NoTrt_B |
| EIF2S2     | 0.0523  | 0.26489 | 0.257 | 0.35 | 1 | HC_vs_MS.NoTrt_B |
| C12orf4    | 0.05239 | 0.299   | 0.588 | 0.72 | 1 | HC_vs_MS.NoTrt_B |
| IVD        | 0.05268 | 0.35149 | 0.9   | 0.93 | 1 | HC_vs_MS.NoTrt_B |
| BAG1       | 0.05269 | 0.46938 | 0.926 | 0.93 | 1 | HC_vs_MS.NoTrt_B |
| GPR89B     | 0.05273 | -0.361  | 0.314 | 0.38 | 1 | HC_vs_MS.NoTrt_B |
| FNTA       | 0.05279 | 0.78922 | 0.854 | 0.84 | 1 | HC_vs_MS.NoTrt_B |
| RGPD6      | 0.05281 | 0.95241 | 0.588 | 0.56 | 1 | HC_vs_MS.NoTrt_B |
| SMAP1      | 0.05283 | -0.5284 | 0.18  | 0.24 | 1 | HC_vs_MS.NoTrt_B |
| ABHD1      | 0.05306 | 0.36142 | 0.758 | 0.74 | 1 | HC_vs_MS.NoTrt_B |

|            |         |         |       |      |   |                  |
|------------|---------|---------|-------|------|---|------------------|
| RBFOX3     | 0.05312 | 0.27622 | 0.783 | 0.78 | 1 | HC_vs_MS.NoTrt_B |
| PYGM       | 0.05315 | 0.73136 | 0.667 | 0.69 | 1 | HC_vs_MS.NoTrt_B |
| CLTA       | 0.05321 | -0.3632 | 0.575 | 0.64 | 1 | HC_vs_MS.NoTrt_B |
| ADGRE2     | 0.05322 | 0.55084 | 0.757 | 0.75 | 1 | HC_vs_MS.NoTrt_B |
| MALL       | 0.05333 | 0.33913 | 0.638 | 0.65 | 1 | HC_vs_MS.NoTrt_B |
| SLC35A3    | 0.05344 | 0.31667 | 0.799 | 0.76 | 1 | HC_vs_MS.NoTrt_B |
| TMEM170A   | 0.05352 | 0.273   | 0.81  | 0.77 | 1 | HC_vs_MS.NoTrt_B |
| SHKBP1     | 0.05357 | -0.2783 | 0.723 | 0.76 | 1 | HC_vs_MS.NoTrt_B |
| SORBS2     | 0.05364 | 0.28589 | 0.545 | 0.5  | 1 | HC_vs_MS.NoTrt_B |
| LIN28A     | 0.05365 | 0.3118  | 0.741 | 0.76 | 1 | HC_vs_MS.NoTrt_B |
| MORC2      | 0.05368 | -0.3117 | 0.388 | 0.44 | 1 | HC_vs_MS.NoTrt_B |
| ZBTB20     | 0.0538  | 0.58243 | 0.796 | 0.74 | 1 | HC_vs_MS.NoTrt_B |
| PLAC8      | 0.05391 | 0.55769 | 0.755 | 0.77 | 1 | HC_vs_MS.NoTrt_B |
| TFAP4      | 0.05392 | 0.62883 | 0.671 | 0.67 | 1 | HC_vs_MS.NoTrt_B |
| ABCB9      | 0.05405 | 0.28641 | 0.833 | 0.84 | 1 | HC_vs_MS.NoTrt_B |
| FAM159A    | 0.05417 | 0.93766 | 0.587 | 0.56 | 1 | HC_vs_MS.NoTrt_B |
| TRAPPC8    | 0.0542  | 0.49548 | 0.672 | 0.64 | 1 | HC_vs_MS.NoTrt_B |
| HLTF       | 0.05441 | 0.77012 | 0.513 | 0.44 | 1 | HC_vs_MS.NoTrt_B |
| ZNF101     | 0.05446 | -0.2786 | 0.951 | 0.96 | 1 | HC_vs_MS.NoTrt_B |
| COQ4       | 0.05466 | 0.26917 | 0.894 | 0.94 | 1 | HC_vs_MS.NoTrt_B |
| ZNF75A     | 0.05466 | -0.6377 | 0.72  | 0.8  | 1 | HC_vs_MS.NoTrt_B |
| CLIP2      | 0.05485 | 0.63369 | 0.362 | 0.32 | 1 | HC_vs_MS.NoTrt_B |
| KCTD1      | 0.05489 | 0.49719 | 0.572 | 0.55 | 1 | HC_vs_MS.NoTrt_B |
| NPHP3      | 0.05492 | 0.51371 | 0.893 | 0.91 | 1 | HC_vs_MS.NoTrt_B |
| SLX4IP     | 0.05497 | -0.5043 | 0.471 | 0.52 | 1 | HC_vs_MS.NoTrt_B |
| FBXW8      | 0.05522 | -0.6705 | 0.257 | 0.33 | 1 | HC_vs_MS.NoTrt_B |
| SHH        | 0.05527 | 1.16983 | 0.106 | 0.06 | 1 | HC_vs_MS.NoTrt_B |
| PLOD1      | 0.05528 | 0.39089 | 0.594 | 0.52 | 1 | HC_vs_MS.NoTrt_B |
| SCYL1      | 0.05531 | -0.3641 | 0.226 | 0.29 | 1 | HC_vs_MS.NoTrt_B |
| DNAJB4     | 0.05534 | -0.5921 | 0.284 | 0.36 | 1 | HC_vs_MS.NoTrt_B |
| AF011889.5 | 0.05552 | -0.2688 | 0.186 | 0.25 | 1 | HC_vs_MS.NoTrt_B |
| DMAP1      | 0.05561 | -0.4025 | 0.441 | 0.51 | 1 | HC_vs_MS.NoTrt_B |
| 1-Mar      | 0.05562 | 0.5852  | 0.31  | 0.25 | 1 | HC_vs_MS.NoTrt_B |
| OLFM2      | 0.05579 | 0.63439 | 0.065 | 0.11 | 1 | HC_vs_MS.NoTrt_B |
| COG7       | 0.05592 | 0.30423 | 0.528 | 0.48 | 1 | HC_vs_MS.NoTrt_B |
| C6orf1     | 0.05604 | -0.306  | 0.097 | 0.15 | 1 | HC_vs_MS.NoTrt_B |
| HCAR1      | 0.05625 | 0.2856  | 0.868 | 0.91 | 1 | HC_vs_MS.NoTrt_B |
| ZNFX1      | 0.0563  | 0.52837 | 0.814 | 0.77 | 1 | HC_vs_MS.NoTrt_B |
| TBX6       | 0.05657 | 0.3147  | 0.47  | 0.4  | 1 | HC_vs_MS.NoTrt_B |
| ANKRD6     | 0.05661 | 0.364   | 0.165 | 0.11 | 1 | HC_vs_MS.NoTrt_B |

|          |         |         |       |      |   |                  |
|----------|---------|---------|-------|------|---|------------------|
| NLN      | 0.05685 | 0.31285 | 0.742 | 0.72 | 1 | HC_vs_MS.NoTrt_B |
| EIF3B    | 0.05695 | 0.52183 | 0.33  | 0.43 | 1 | HC_vs_MS.NoTrt_B |
| ANAPC1   | 0.05707 | 0.80491 | 0.614 | 0.56 | 1 | HC_vs_MS.NoTrt_B |
| ULK4     | 0.05746 | -0.4912 | 0.277 | 0.35 | 1 | HC_vs_MS.NoTrt_B |
| HAAO     | 0.0575  | -0.5431 | 0.075 | 0.12 | 1 | HC_vs_MS.NoTrt_B |
| RBMXL1   | 0.05758 | 0.63363 | 0.12  | 0.07 | 1 | HC_vs_MS.NoTrt_B |
| PSMA2    | 0.05772 | -0.2622 | 0.554 | 0.61 | 1 | HC_vs_MS.NoTrt_B |
| PARP15   | 0.05786 | 0.3181  | 0.899 | 0.88 | 1 | HC_vs_MS.NoTrt_B |
| FBXO27   | 0.058   | 0.32229 | 0.697 | 0.68 | 1 | HC_vs_MS.NoTrt_B |
| XPNPEP1  | 0.05802 | -0.6008 | 0.287 | 0.35 | 1 | HC_vs_MS.NoTrt_B |
| CARS2    | 0.05811 | 0.74686 | 0.758 | 0.77 | 1 | HC_vs_MS.NoTrt_B |
| FASLG    | 0.05819 | 0.2783  | 0.071 | 0.11 | 1 | HC_vs_MS.NoTrt_B |
| CCDC40   | 0.05823 | 0.27912 | 0.772 | 0.75 | 1 | HC_vs_MS.NoTrt_B |
| TRIM36   | 0.05824 | 0.29112 | 0.371 | 0.31 | 1 | HC_vs_MS.NoTrt_B |
| DUSP19   | 0.05844 | 0.3502  | 0.668 | 0.64 | 1 | HC_vs_MS.NoTrt_B |
| SNX22    | 0.05864 | 0.36828 | 0.803 | 0.8  | 1 | HC_vs_MS.NoTrt_B |
| DAP      | 0.05873 | -0.2601 | 0.11  | 0.16 | 1 | HC_vs_MS.NoTrt_B |
| BTBD2    | 0.05905 | 0.98507 | 0.378 | 0.34 | 1 | HC_vs_MS.NoTrt_B |
| C15orf57 | 0.0595  | 0.65052 | 0.772 | 0.74 | 1 | HC_vs_MS.NoTrt_B |
| QTRT1    | 0.05968 | 0.67015 | 0.814 | 0.82 | 1 | HC_vs_MS.NoTrt_B |
| SOWAHC   | 0.05969 | 0.48992 | 0.42  | 0.36 | 1 | HC_vs_MS.NoTrt_B |
| SPTLC3   | 0.05987 | 0.61399 | 0.513 | 0.51 | 1 | HC_vs_MS.NoTrt_B |
| ELK1     | 0.05997 | -1.0511 | 0.07  | 0.11 | 1 | HC_vs_MS.NoTrt_B |
| CHMP3    | 0.06009 | -0.3102 | 0.299 | 0.36 | 1 | HC_vs_MS.NoTrt_B |
| TMEM38A  | 0.06026 | 0.53074 | 0.503 | 0.45 | 1 | HC_vs_MS.NoTrt_B |
| KCNE1    | 0.0603  | 0.32484 | 0.546 | 0.52 | 1 | HC_vs_MS.NoTrt_B |
| IGF1R    | 0.06038 | 0.72136 | 0.354 | 0.29 | 1 | HC_vs_MS.NoTrt_B |
| CDK9     | 0.06052 | -0.662  | 0.072 | 0.11 | 1 | HC_vs_MS.NoTrt_B |
| PLXDC1   | 0.06071 | 0.34564 | 0.729 | 0.72 | 1 | HC_vs_MS.NoTrt_B |
| PNPLA6   | 0.0608  | -0.3735 | 0.126 | 0.18 | 1 | HC_vs_MS.NoTrt_B |
| HSD17B4  | 0.06082 | 0.71276 | 0.642 | 0.63 | 1 | HC_vs_MS.NoTrt_B |
| OSBPL6   | 0.06093 | 0.27152 | 0.562 | 0.55 | 1 | HC_vs_MS.NoTrt_B |
| LMCD1    | 0.06093 | -0.4401 | 0.284 | 0.22 | 1 | HC_vs_MS.NoTrt_B |
| SLC30A4  | 0.06095 | 0.34514 | 0.871 | 0.87 | 1 | HC_vs_MS.NoTrt_B |
| LRIG1    | 0.0611  | 0.30306 | 0.238 | 0.31 | 1 | HC_vs_MS.NoTrt_B |
| AGXT     | 0.0616  | 0.29166 | 0.643 | 0.64 | 1 | HC_vs_MS.NoTrt_B |
| ERI1     | 0.06177 | 0.61462 | 0.365 | 0.45 | 1 | HC_vs_MS.NoTrt_B |
| DMXL2    | 0.06178 | 0.37864 | 0.462 | 0.43 | 1 | HC_vs_MS.NoTrt_B |
| EXTL3    | 0.0618  | 0.27727 | 0.923 | 0.92 | 1 | HC_vs_MS.NoTrt_B |
| SH2D1A   | 0.06183 | 0.33608 | 0.159 | 0.22 | 1 | HC_vs_MS.NoTrt_B |



|            |         |         |       |      |   |                  |
|------------|---------|---------|-------|------|---|------------------|
| GLTSCR1    | 0.06229 | 0.47218 | 0.581 | 0.51 | 1 | HC_vs_MS.NoTrt_B |
| CD200      | 0.06237 | 0.74521 | 0.532 | 0.51 | 1 | HC_vs_MS.NoTrt_B |
| FRS3       | 0.06247 | 0.52135 | 0.32  | 0.27 | 1 | HC_vs_MS.NoTrt_B |
| CYC1       | 0.06256 | -0.2525 | 0.099 | 0.15 | 1 | HC_vs_MS.NoTrt_B |
| TMEM263    | 0.0627  | -0.2571 | 0.377 | 0.44 | 1 | HC_vs_MS.NoTrt_B |
| TTLL10     | 0.06291 | 0.40462 | 0.617 | 0.6  | 1 | HC_vs_MS.NoTrt_B |
| KSR1       | 0.06295 | 0.45342 | 0.286 | 0.22 | 1 | HC_vs_MS.NoTrt_B |
| E2F5       | 0.06299 | 0.83202 | 0.332 | 0.28 | 1 | HC_vs_MS.NoTrt_B |
| ATP6AP1    | 0.06307 | -0.3855 | 0.365 | 0.42 | 1 | HC_vs_MS.NoTrt_B |
| CXCR6      | 0.06308 | -0.8518 | 0.128 | 0.18 | 1 | HC_vs_MS.NoTrt_B |
| TRAPPC12   | 0.06308 | 0.60613 | 0.599 | 0.57 | 1 | HC_vs_MS.NoTrt_B |
| TTYH2      | 0.06315 | -0.4652 | 0.077 | 0.12 | 1 | HC_vs_MS.NoTrt_B |
| RNPC3      | 0.06321 | 0.43698 | 0.362 | 0.48 | 1 | HC_vs_MS.NoTrt_B |
| STK11      | 0.06335 | -0.2963 | 0.417 | 0.36 | 1 | HC_vs_MS.NoTrt_B |
| CALR       | 0.06344 | -0.4044 | 0.752 | 0.82 | 1 | HC_vs_MS.NoTrt_B |
| AKAP5      | 0.06357 | 0.66501 | 0.625 | 0.58 | 1 | HC_vs_MS.NoTrt_B |
| TOPORS     | 0.0637  | 0.31675 | 0.083 | 0.13 | 1 | HC_vs_MS.NoTrt_B |
| MRPL19     | 0.06404 | 0.49929 | 0.243 | 0.32 | 1 | HC_vs_MS.NoTrt_B |
| TEP1       | 0.06406 | 0.41891 | 0.399 | 0.49 | 1 | HC_vs_MS.NoTrt_B |
| SGPL1      | 0.06427 | -0.5418 | 0.419 | 0.48 | 1 | HC_vs_MS.NoTrt_B |
| SLC5A3     | 0.06434 | 0.77727 | 0.067 | 0.11 | 1 | HC_vs_MS.NoTrt_B |
| TTLL7      | 0.0644  | 0.25749 | 0.78  | 0.77 | 1 | HC_vs_MS.NoTrt_B |
| ZNF845     | 0.06446 | 0.87626 | 0.645 | 0.6  | 1 | HC_vs_MS.NoTrt_B |
| QPCTL      | 0.0645  | 0.33143 | 0.742 | 0.76 | 1 | HC_vs_MS.NoTrt_B |
| DDX41      | 0.06463 | -0.3854 | 0.086 | 0.13 | 1 | HC_vs_MS.NoTrt_B |
| CTD-2369P2 | 0.06491 | 0.6383  | 0.284 | 0.24 | 1 | HC_vs_MS.NoTrt_B |
| RP11-166B2 | 0.06497 | 0.77676 | 0.507 | 0.48 | 1 | HC_vs_MS.NoTrt_B |
| STK26      | 0.06508 | 0.52149 | 0.078 | 0.12 | 1 | HC_vs_MS.NoTrt_B |
| CTH        | 0.06517 | 0.36256 | 0.626 | 0.62 | 1 | HC_vs_MS.NoTrt_B |
| NFE2L2     | 0.06541 | 0.68199 | 0.561 | 0.5  | 1 | HC_vs_MS.NoTrt_B |
| RAD51      | 0.06556 | -0.2791 | 0.478 | 0.43 | 1 | HC_vs_MS.NoTrt_B |
| LOXL2      | 0.0657  | 0.6463  | 0.71  | 0.73 | 1 | HC_vs_MS.NoTrt_B |
| DMD        | 0.06595 | 0.49404 | 0.619 | 0.62 | 1 | HC_vs_MS.NoTrt_B |
| B3GNTL1    | 0.06599 | -0.6043 | 0.217 | 0.29 | 1 | HC_vs_MS.NoTrt_B |
| NME3       | 0.0663  | -0.2816 | 0.113 | 0.16 | 1 | HC_vs_MS.NoTrt_B |
| RASGRF2    | 0.0663  | 0.65328 | 0.165 | 0.11 | 1 | HC_vs_MS.NoTrt_B |
| YKT6       | 0.06652 | -0.2961 | 0.077 | 0.12 | 1 | HC_vs_MS.NoTrt_B |
| PLCE1      | 0.06667 | 0.31825 | 0.916 | 0.88 | 1 | HC_vs_MS.NoTrt_B |
| DCUN1D1    | 0.06691 | 0.29626 | 0.372 | 0.44 | 1 | HC_vs_MS.NoTrt_B |
| CASK       | 0.06699 | 0.27762 | 0.12  | 0.17 | 1 | HC_vs_MS.NoTrt_B |

|            |         |         |       |      |   |                  |
|------------|---------|---------|-------|------|---|------------------|
| RASSF8     | 0.06716 | 0.27971 | 0.461 | 0.41 | 1 | HC_vs_MS.NoTrt_B |
| ZNF264     | 0.06717 | 0.45532 | 0.917 | 0.91 | 1 | HC_vs_MS.NoTrt_B |
| BRWD3      | 0.0673  | 0.39886 | 0.117 | 0.07 | 1 | HC_vs_MS.NoTrt_B |
| ART4       | 0.06753 | 0.28553 | 0.5   | 0.45 | 1 | HC_vs_MS.NoTrt_B |
| ERCC1      | 0.06755 | -0.5448 | 0.784 | 0.88 | 1 | HC_vs_MS.NoTrt_B |
| APOL1      | 0.06758 | 0.92413 | 0.7   | 0.65 | 1 | HC_vs_MS.NoTrt_B |
| TMEM106A   | 0.06767 | 0.28024 | 0.677 | 0.66 | 1 | HC_vs_MS.NoTrt_B |
| XPO7       | 0.06791 | -0.3681 | 0.1   | 0.15 | 1 | HC_vs_MS.NoTrt_B |
| PRSS27     | 0.06799 | 0.29709 | 0.755 | 0.74 | 1 | HC_vs_MS.NoTrt_B |
| RP11-849H4 | 0.06801 | 0.75464 | 0.596 | 0.51 | 1 | HC_vs_MS.NoTrt_B |
| SCYL3      | 0.06838 | 0.90711 | 0.659 | 0.64 | 1 | HC_vs_MS.NoTrt_B |
| ADGRG1     | 0.06848 | 0.67104 | 0.654 | 0.65 | 1 | HC_vs_MS.NoTrt_B |
| PTPRZ1     | 0.06883 | 0.28749 | 0.21  | 0.16 | 1 | HC_vs_MS.NoTrt_B |
| NOP56      | 0.06905 | -0.2619 | 0.4   | 0.47 | 1 | HC_vs_MS.NoTrt_B |
| GGPS1      | 0.06914 | -0.2652 | 0.378 | 0.47 | 1 | HC_vs_MS.NoTrt_B |
| DCAF10     | 0.06914 | 0.445   | 0.793 | 0.79 | 1 | HC_vs_MS.NoTrt_B |
| CWC27      | 0.06918 | -0.5302 | 0.101 | 0.15 | 1 | HC_vs_MS.NoTrt_B |
| ZC3H4      | 0.06955 | 0.46356 | 0.312 | 0.42 | 1 | HC_vs_MS.NoTrt_B |
| NAV2       | 0.0696  | 0.7217  | 0.372 | 0.32 | 1 | HC_vs_MS.NoTrt_B |
| ACOX3      | 0.06984 | -0.5258 | 0.077 | 0.12 | 1 | HC_vs_MS.NoTrt_B |
| UNC13C     | 0.06995 | 0.32777 | 0.607 | 0.62 | 1 | HC_vs_MS.NoTrt_B |
| AGAP2      | 0.06998 | -0.5967 | 0.151 | 0.2  | 1 | HC_vs_MS.NoTrt_B |
| IPO9       | 0.07    | 0.30194 | 0.825 | 0.83 | 1 | HC_vs_MS.NoTrt_B |
| SYDE2      | 0.07023 | 0.4547  | 0.48  | 0.44 | 1 | HC_vs_MS.NoTrt_B |
| DCAF6      | 0.07023 | 0.53868 | 0.159 | 0.22 | 1 | HC_vs_MS.NoTrt_B |
| MELK       | 0.0703  | 0.64573 | 0.504 | 0.48 | 1 | HC_vs_MS.NoTrt_B |
| REEP4      | 0.07031 | -0.5585 | 0.065 | 0.1  | 1 | HC_vs_MS.NoTrt_B |
| PMF1       | 0.07031 | -0.3355 | 0.462 | 0.51 | 1 | HC_vs_MS.NoTrt_B |
| UGT2B4     | 0.07036 | 0.28115 | 0.367 | 0.3  | 1 | HC_vs_MS.NoTrt_B |
| SLU7       | 0.07041 | -0.2933 | 0.368 | 0.43 | 1 | HC_vs_MS.NoTrt_B |
| IFRD1      | 0.07045 | 0.4726  | 0.387 | 0.33 | 1 | HC_vs_MS.NoTrt_B |
| CLNK       | 0.07046 | 0.68878 | 0.626 | 0.64 | 1 | HC_vs_MS.NoTrt_B |
| TTC17      | 0.07058 | -0.284  | 0.41  | 0.46 | 1 | HC_vs_MS.NoTrt_B |
| GAS7       | 0.07088 | 0.37163 | 0.586 | 0.56 | 1 | HC_vs_MS.NoTrt_B |
| RBBP8      | 0.0711  | 0.62876 | 0.072 | 0.11 | 1 | HC_vs_MS.NoTrt_B |
| PSMD14     | 0.0713  | -0.536  | 0.087 | 0.13 | 1 | HC_vs_MS.NoTrt_B |
| CXorf36    | 0.07134 | 0.42226 | 0.383 | 0.34 | 1 | HC_vs_MS.NoTrt_B |
| ARSA       | 0.07137 | -0.2758 | 0.68  | 0.73 | 1 | HC_vs_MS.NoTrt_B |
| SOS2       | 0.07141 | -0.4173 | 0.083 | 0.12 | 1 | HC_vs_MS.NoTrt_B |
| MEGF6      | 0.07201 | -0.3782 | 0.11  | 0.16 | 1 | HC_vs_MS.NoTrt_B |

|           |         |         |       |      |   |                  |
|-----------|---------|---------|-------|------|---|------------------|
| TANC2     | 0.07202 | 1.63645 | 0.257 | 0.2  | 1 | HC_vs_MS.NoTrt_B |
| NUMB      | 0.07217 | -0.2643 | 0.709 | 0.76 | 1 | HC_vs_MS.NoTrt_B |
| ARHGAP18  | 0.0724  | -1.0381 | 0.074 | 0.11 | 1 | HC_vs_MS.NoTrt_B |
| RAD23B    | 0.07245 | -0.7109 | 0.439 | 0.53 | 1 | HC_vs_MS.NoTrt_B |
| PDCL      | 0.07257 | -0.3673 | 0.375 | 0.44 | 1 | HC_vs_MS.NoTrt_B |
| COPS6     | 0.07257 | -0.4798 | 0.671 | 0.69 | 1 | HC_vs_MS.NoTrt_B |
| FPGT      | 0.07267 | -0.5466 | 0.087 | 0.13 | 1 | HC_vs_MS.NoTrt_B |
| ST6GALNAC | 0.07268 | 0.27772 | 0.187 | 0.14 | 1 | HC_vs_MS.NoTrt_B |
| TGFBR3    | 0.07288 | 0.53691 | 0.388 | 0.47 | 1 | HC_vs_MS.NoTrt_B |
| UBE4A     | 0.07289 | 0.40078 | 0.367 | 0.46 | 1 | HC_vs_MS.NoTrt_B |
| ATP6V1B2  | 0.0729  | -0.3643 | 0.594 | 0.67 | 1 | HC_vs_MS.NoTrt_B |
| OSER1     | 0.07295 | -0.4154 | 0.157 | 0.21 | 1 | HC_vs_MS.NoTrt_B |
| EIF2AK2   | 0.07303 | 0.57323 | 0.825 | 0.84 | 1 | HC_vs_MS.NoTrt_B |
| REXO1     | 0.07337 | -0.4244 | 0.068 | 0.11 | 1 | HC_vs_MS.NoTrt_B |
| SLC3A1    | 0.07345 | 1.10578 | 0.684 | 0.7  | 1 | HC_vs_MS.NoTrt_B |
| MAGEH1    | 0.07361 | -0.3955 | 0.074 | 0.11 | 1 | HC_vs_MS.NoTrt_B |
| UBASH3A   | 0.07392 | -0.3821 | 0.183 | 0.24 | 1 | HC_vs_MS.NoTrt_B |
| TLE2      | 0.07395 | 0.87301 | 0.487 | 0.44 | 1 | HC_vs_MS.NoTrt_B |
| GLB1L3    | 0.07396 | 0.63113 | 0.7   | 0.69 | 1 | HC_vs_MS.NoTrt_B |
| EGR3      | 0.07406 | 0.25981 | 0.193 | 0.14 | 1 | HC_vs_MS.NoTrt_B |
| ARRB1     | 0.07418 | -0.3669 | 0.716 | 0.69 | 1 | HC_vs_MS.NoTrt_B |
| RNF44     | 0.07472 | 0.97334 | 0.37  | 0.32 | 1 | HC_vs_MS.NoTrt_B |
| TNFSF4    | 0.07488 | 0.69032 | 0.122 | 0.08 | 1 | HC_vs_MS.NoTrt_B |
| GBP6      | 0.07496 | 0.27802 | 0.445 | 0.38 | 1 | HC_vs_MS.NoTrt_B |
| LEO1      | 0.07514 | 0.87684 | 0.548 | 0.49 | 1 | HC_vs_MS.NoTrt_B |
| LLGL2     | 0.07535 | 0.4057  | 0.386 | 0.34 | 1 | HC_vs_MS.NoTrt_B |
| PEX16     | 0.07536 | -0.4648 | 0.712 | 0.8  | 1 | HC_vs_MS.NoTrt_B |
| BECN1     | 0.07543 | -0.3382 | 0.704 | 0.74 | 1 | HC_vs_MS.NoTrt_B |
| KBTBD2    | 0.07546 | 0.4193  | 0.632 | 0.6  | 1 | HC_vs_MS.NoTrt_B |
| BCAM      | 0.07549 | 0.28263 | 0.741 | 0.75 | 1 | HC_vs_MS.NoTrt_B |
| MRTO4     | 0.07569 | -0.3479 | 0.449 | 0.55 | 1 | HC_vs_MS.NoTrt_B |
| MAN1C1    | 0.07573 | 0.55283 | 0.867 | 0.85 | 1 | HC_vs_MS.NoTrt_B |
| STRN      | 0.07608 | 1.19538 | 0.225 | 0.17 | 1 | HC_vs_MS.NoTrt_B |
| FCRL2     | 0.07615 | 0.52967 | 0.619 | 0.58 | 1 | HC_vs_MS.NoTrt_B |
| TMEM132B  | 0.07625 | 0.64248 | 0.267 | 0.21 | 1 | HC_vs_MS.NoTrt_B |
| DDI2      | 0.07628 | 0.288   | 0.751 | 0.7  | 1 | HC_vs_MS.NoTrt_B |
| PRKAR2A   | 0.07633 | 0.36074 | 0.883 | 0.88 | 1 | HC_vs_MS.NoTrt_B |
| SERTAD2   | 0.07637 | 1.29    | 0.119 | 0.08 | 1 | HC_vs_MS.NoTrt_B |
| RAP1B     | 0.07642 | 0.29309 | 0.993 | 0.99 | 1 | HC_vs_MS.NoTrt_B |
| RPP14     | 0.07695 | 0.25965 | 0.907 | 0.91 | 1 | HC_vs_MS.NoTrt_B |

|          |         |         |       |      |   |                  |
|----------|---------|---------|-------|------|---|------------------|
| PSPN     | 0.07696 | 0.32103 | 0.688 | 0.66 | 1 | HC_vs_MS.NoTrt_B |
| C1orf35  | 0.07706 | -0.5645 | 0.2   | 0.25 | 1 | HC_vs_MS.NoTrt_B |
| TRAPPC6B | 0.07713 | 0.39794 | 0.503 | 0.47 | 1 | HC_vs_MS.NoTrt_B |
| GPATCH11 | 0.07717 | 0.65791 | 0.507 | 0.47 | 1 | HC_vs_MS.NoTrt_B |
| AGAP4    | 0.07719 | 0.6209  | 0.21  | 0.29 | 1 | HC_vs_MS.NoTrt_B |
| AMPH     | 0.07729 | -0.5241 | 0.136 | 0.19 | 1 | HC_vs_MS.NoTrt_B |
| CRIP2    | 0.07794 | -0.3183 | 0.12  | 0.17 | 1 | HC_vs_MS.NoTrt_B |
| PPFIBP1  | 0.07795 | 0.43574 | 0.735 | 0.72 | 1 | HC_vs_MS.NoTrt_B |
| XRN1     | 0.07798 | 0.48827 | 0.909 | 0.92 | 1 | HC_vs_MS.NoTrt_B |
| DHFR2    | 0.07826 | -0.4014 | 0.59  | 0.63 | 1 | HC_vs_MS.NoTrt_B |
| PCGF5    | 0.07858 | -0.3771 | 0.329 | 0.38 | 1 | HC_vs_MS.NoTrt_B |
| ATP11B   | 0.07869 | 0.38318 | 0.204 | 0.27 | 1 | HC_vs_MS.NoTrt_B |
| PDZD2    | 0.07888 | 0.51308 | 0.668 | 0.64 | 1 | HC_vs_MS.NoTrt_B |
| SMAD1    | 0.07935 | 1.17196 | 0.32  | 0.27 | 1 | HC_vs_MS.NoTrt_B |
| ADAR     | 0.07965 | 0.48323 | 0.796 | 0.84 | 1 | HC_vs_MS.NoTrt_B |
| CACNB2   | 0.07983 | 0.9678  | 0.449 | 0.4  | 1 | HC_vs_MS.NoTrt_B |
| PRR5     | 0.08005 | 0.57868 | 0.51  | 0.48 | 1 | HC_vs_MS.NoTrt_B |
| SIGLEC10 | 0.08031 | 0.33979 | 0.623 | 0.61 | 1 | HC_vs_MS.NoTrt_B |
| C5orf42  | 0.08041 | 0.66163 | 0.51  | 0.5  | 1 | HC_vs_MS.NoTrt_B |
| C15orf53 | 0.08048 | -0.3253 | 0.065 | 0.1  | 1 | HC_vs_MS.NoTrt_B |
| MARK4    | 0.08063 | 0.48393 | 0.58  | 0.55 | 1 | HC_vs_MS.NoTrt_B |
| 11-Sep   | 0.08065 | 0.5326  | 0.387 | 0.32 | 1 | HC_vs_MS.NoTrt_B |
| DEK      | 0.08072 | 0.29872 | 0.414 | 0.52 | 1 | HC_vs_MS.NoTrt_B |
| WASH1    | 0.08103 | 0.71567 | 0.2   | 0.28 | 1 | HC_vs_MS.NoTrt_B |
| MAPKBP1  | 0.08104 | 0.38435 | 0.387 | 0.48 | 1 | HC_vs_MS.NoTrt_B |
| CWF19L2  | 0.08109 | 0.312   | 0.316 | 0.4  | 1 | HC_vs_MS.NoTrt_B |
| BRI3BP   | 0.08118 | 0.60402 | 0.846 | 0.86 | 1 | HC_vs_MS.NoTrt_B |
| UHRF1BP1 | 0.08121 | -0.5553 | 0.549 | 0.65 | 1 | HC_vs_MS.NoTrt_B |
| LENG1    | 0.08157 | -0.6202 | 0.07  | 0.11 | 1 | HC_vs_MS.NoTrt_B |
| SLC9A9   | 0.08174 | -0.356  | 0.129 | 0.18 | 1 | HC_vs_MS.NoTrt_B |
| CCT7     | 0.08187 | -0.271  | 0.204 | 0.26 | 1 | HC_vs_MS.NoTrt_B |
| CCDC91   | 0.0819  | 0.50858 | 0.486 | 0.43 | 1 | HC_vs_MS.NoTrt_B |
| LHFPL2   | 0.08202 | 0.78664 | 0.29  | 0.36 | 1 | HC_vs_MS.NoTrt_B |
| SBF1     | 0.08214 | 0.88451 | 0.2   | 0.15 | 1 | HC_vs_MS.NoTrt_B |
| MRPS17   | 0.08221 | 0.32881 | 0.845 | 0.83 | 1 | HC_vs_MS.NoTrt_B |
| AMFR     | 0.08256 | -0.3857 | 0.514 | 0.42 | 1 | HC_vs_MS.NoTrt_B |
| MROH8    | 0.0827  | 0.25333 | 0.329 | 0.27 | 1 | HC_vs_MS.NoTrt_B |
| FCHSD1   | 0.08278 | -0.2817 | 0.281 | 0.35 | 1 | HC_vs_MS.NoTrt_B |
| PPIH     | 0.08279 | -0.5583 | 0.075 | 0.11 | 1 | HC_vs_MS.NoTrt_B |
| FAM13A   | 0.08325 | 0.37551 | 0.207 | 0.15 | 1 | HC_vs_MS.NoTrt_B |

|         |         |         |       |      |   |                  |
|---------|---------|---------|-------|------|---|------------------|
| MAFF    | 0.08336 | 0.41441 | 0.642 | 0.6  | 1 | HC_vs_MS.NoTrt_B |
| ITGA2B  | 0.08348 | 0.2716  | 0.325 | 0.27 | 1 | HC_vs_MS.NoTrt_B |
| LIN7B   | 0.08355 | 0.35635 | 0.309 | 0.25 | 1 | HC_vs_MS.NoTrt_B |
| ARRDC2  | 0.08372 | -0.318  | 0.084 | 0.12 | 1 | HC_vs_MS.NoTrt_B |
| GANC    | 0.08372 | 0.38334 | 0.607 | 0.54 | 1 | HC_vs_MS.NoTrt_B |
| KLHL5   | 0.08373 | -0.6455 | 0.419 | 0.53 | 1 | HC_vs_MS.NoTrt_B |
| LYAR    | 0.08376 | -0.2998 | 0.07  | 0.11 | 1 | HC_vs_MS.NoTrt_B |
| STK17B  | 0.08377 | 0.29553 | 0.933 | 0.96 | 1 | HC_vs_MS.NoTrt_B |
| IGFL2   | 0.08378 | 0.4107  | 0.329 | 0.28 | 1 | HC_vs_MS.NoTrt_B |
| DDOST   | 0.08381 | -0.2868 | 0.545 | 0.57 | 1 | HC_vs_MS.NoTrt_B |
| RNF113A | 0.08396 | -0.2516 | 0.096 | 0.14 | 1 | HC_vs_MS.NoTrt_B |
| RBMS3   | 0.08431 | 0.74365 | 0.672 | 0.67 | 1 | HC_vs_MS.NoTrt_B |
| EMCN    | 0.08444 | 0.36274 | 0.438 | 0.37 | 1 | HC_vs_MS.NoTrt_B |
| SCAI    | 0.08458 | 0.75139 | 0.832 | 0.83 | 1 | HC_vs_MS.NoTrt_B |
| PDK1    | 0.08462 | 0.254   | 0.797 | 0.86 | 1 | HC_vs_MS.NoTrt_B |
| TTC32   | 0.08468 | 0.47461 | 0.081 | 0.12 | 1 | HC_vs_MS.NoTrt_B |
| CXorf23 | 0.08477 | 0.49166 | 0.741 | 0.72 | 1 | HC_vs_MS.NoTrt_B |
| SYT14   | 0.08491 | 0.32474 | 0.316 | 0.27 | 1 | HC_vs_MS.NoTrt_B |
| PECAM1  | 0.08525 | 0.93905 | 0.748 | 0.74 | 1 | HC_vs_MS.NoTrt_B |
| MAP2K1  | 0.08528 | 1.19391 | 0.113 | 0.07 | 1 | HC_vs_MS.NoTrt_B |
| ZNF583  | 0.08531 | 0.4206  | 0.803 | 0.85 | 1 | HC_vs_MS.NoTrt_B |
| PDS5B   | 0.08534 | 0.34713 | 0.312 | 0.38 | 1 | HC_vs_MS.NoTrt_B |
| ZDHHC18 | 0.08538 | -0.4544 | 0.065 | 0.1  | 1 | HC_vs_MS.NoTrt_B |
| SLC9A6  | 0.08549 | 0.33778 | 0.407 | 0.34 | 1 | HC_vs_MS.NoTrt_B |
| POLDIP2 | 0.08551 | -0.3577 | 0.093 | 0.14 | 1 | HC_vs_MS.NoTrt_B |
| LRRD1   | 0.08583 | 0.2874  | 0.522 | 0.48 | 1 | HC_vs_MS.NoTrt_B |
| ITGA1   | 0.08613 | 0.26698 | 0.661 | 0.67 | 1 | HC_vs_MS.NoTrt_B |
| TMEM199 | 0.08617 | -0.4097 | 0.578 | 0.67 | 1 | HC_vs_MS.NoTrt_B |
| HPSE    | 0.0862  | -0.2653 | 0.617 | 0.57 | 1 | HC_vs_MS.NoTrt_B |
| RNF220  | 0.08623 | 0.75038 | 0.641 | 0.65 | 1 | HC_vs_MS.NoTrt_B |
| RHBDD2  | 0.08636 | -0.3146 | 0.226 | 0.28 | 1 | HC_vs_MS.NoTrt_B |
| SEMA4C  | 0.08645 | 0.46075 | 0.762 | 0.76 | 1 | HC_vs_MS.NoTrt_B |
| CDH18   | 0.08648 | 0.31207 | 0.73  | 0.76 | 1 | HC_vs_MS.NoTrt_B |
| LINS1   | 0.08652 | 0.75505 | 0.572 | 0.55 | 1 | HC_vs_MS.NoTrt_B |
| TACR2   | 0.08662 | 0.47089 | 0.129 | 0.09 | 1 | HC_vs_MS.NoTrt_B |
| ZNF496  | 0.08665 | 0.71233 | 0.681 | 0.67 | 1 | HC_vs_MS.NoTrt_B |
| DPY19L4 | 0.08669 | 1.09219 | 0.488 | 0.45 | 1 | HC_vs_MS.NoTrt_B |
| PVR     | 0.08746 | 0.28221 | 0.454 | 0.4  | 1 | HC_vs_MS.NoTrt_B |
| ARMC9   | 0.08769 | 0.53867 | 0.668 | 0.68 | 1 | HC_vs_MS.NoTrt_B |
| STXBP6  | 0.08788 | 0.28773 | 0.161 | 0.11 | 1 | HC_vs_MS.NoTrt_B |

|            |         |         |       |      |   |                  |
|------------|---------|---------|-------|------|---|------------------|
| RP11-176H8 | 0.08789 | 0.28179 | 0.823 | 0.82 | 1 | HC_vs_MS.NoTrt_B |
| ARL10      | 0.08807 | 0.66896 | 0.849 | 0.83 | 1 | HC_vs_MS.NoTrt_B |
| ABCC4      | 0.08809 | 0.52881 | 0.703 | 0.75 | 1 | HC_vs_MS.NoTrt_B |
| SCN3B      | 0.08811 | 0.28634 | 0.68  | 0.69 | 1 | HC_vs_MS.NoTrt_B |
| AARSD1     | 0.08854 | 0.5044  | 0.678 | 0.68 | 1 | HC_vs_MS.NoTrt_B |
| SHROOM4    | 0.08855 | 0.2918  | 0.643 | 0.61 | 1 | HC_vs_MS.NoTrt_B |
| GRAMD3     | 0.08874 | -0.3    | 0.69  | 0.78 | 1 | HC_vs_MS.NoTrt_B |
| APPL2      | 0.08882 | 0.39851 | 0.348 | 0.29 | 1 | HC_vs_MS.NoTrt_B |
| ZNF225     | 0.08895 | 0.39493 | 0.768 | 0.74 | 1 | HC_vs_MS.NoTrt_B |
| LRP8       | 0.08899 | 0.29887 | 0.503 | 0.47 | 1 | HC_vs_MS.NoTrt_B |
| STPG1      | 0.08902 | 0.34093 | 0.755 | 0.77 | 1 | HC_vs_MS.NoTrt_B |
| BCAS1      | 0.08909 | -0.8132 | 0.345 | 0.42 | 1 | HC_vs_MS.NoTrt_B |
| NEO1       | 0.08914 | 0.27658 | 0.245 | 0.33 | 1 | HC_vs_MS.NoTrt_B |
| TGFBR2     | 0.08953 | 0.97734 | 0.162 | 0.11 | 1 | HC_vs_MS.NoTrt_B |
| SLC25A20   | 0.08955 | -0.8326 | 0.093 | 0.14 | 1 | HC_vs_MS.NoTrt_B |
| LLNLF-187D | 0.08961 | 0.32024 | 0.546 | 0.54 | 1 | HC_vs_MS.NoTrt_B |
| CAPG       | 0.08989 | -0.6558 | 0.071 | 0.11 | 1 | HC_vs_MS.NoTrt_B |
| INTS9      | 0.08992 | -0.5286 | 0.094 | 0.14 | 1 | HC_vs_MS.NoTrt_B |
| RPF1       | 0.08997 | -0.4791 | 0.232 | 0.29 | 1 | HC_vs_MS.NoTrt_B |
| APOE       | 0.09008 | 0.30233 | 0.743 | 0.74 | 1 | HC_vs_MS.NoTrt_B |
| DNAH9      | 0.09017 | 0.50787 | 0.436 | 0.38 | 1 | HC_vs_MS.NoTrt_B |
| ADCK1      | 0.09031 | 1.03046 | 0.274 | 0.22 | 1 | HC_vs_MS.NoTrt_B |
| ITGA4      | 0.09038 | 0.75839 | 0.223 | 0.17 | 1 | HC_vs_MS.NoTrt_B |
| SERF1B     | 0.09042 | 0.27632 | 0.454 | 0.39 | 1 | HC_vs_MS.NoTrt_B |
| GREB1      | 0.09044 | 0.375   | 0.836 | 0.85 | 1 | HC_vs_MS.NoTrt_B |
| ZNF684     | 0.09058 | 0.61193 | 0.694 | 0.69 | 1 | HC_vs_MS.NoTrt_B |
| CD300LG    | 0.0907  | 0.36666 | 0.4   | 0.36 | 1 | HC_vs_MS.NoTrt_B |
| C7orf73    | 0.09076 | -0.2857 | 0.61  | 0.67 | 1 | HC_vs_MS.NoTrt_B |
| RNF157     | 0.0909  | 0.3148  | 0.607 | 0.56 | 1 | HC_vs_MS.NoTrt_B |
| CEP89      | 0.09091 | 0.35932 | 0.868 | 0.92 | 1 | HC_vs_MS.NoTrt_B |
| SSR4       | 0.09106 | -0.4671 | 0.333 | 0.38 | 1 | HC_vs_MS.NoTrt_B |
| C3orf70    | 0.09138 | 0.37547 | 0.699 | 0.65 | 1 | HC_vs_MS.NoTrt_B |
| PNO1       | 0.09165 | 0.25294 | 0.686 | 0.67 | 1 | HC_vs_MS.NoTrt_B |
| MFSD10     | 0.09168 | -0.3869 | 0.107 | 0.15 | 1 | HC_vs_MS.NoTrt_B |
| AKR1D1     | 0.09177 | 0.2702  | 0.564 | 0.55 | 1 | HC_vs_MS.NoTrt_B |
| FOXP3      | 0.09211 | 0.4061  | 0.457 | 0.57 | 1 | HC_vs_MS.NoTrt_B |
| PPARGC1B   | 0.09216 | 0.47511 | 0.694 | 0.67 | 1 | HC_vs_MS.NoTrt_B |
| GFM1       | 0.09224 | 0.27035 | 0.87  | 0.9  | 1 | HC_vs_MS.NoTrt_B |
| FBXO48     | 0.09228 | 0.75891 | 0.691 | 0.68 | 1 | HC_vs_MS.NoTrt_B |
| JRK        | 0.09229 | 1.43347 | 0.433 | 0.4  | 1 | HC_vs_MS.NoTrt_B |

|          |         |         |       |      |   |                  |
|----------|---------|---------|-------|------|---|------------------|
| KIAA2012 | 0.09239 | 0.32356 | 0.643 | 0.63 | 1 | HC_vs_MS.NoTrt_B |
| RSL1D1   | 0.09257 | 0.26154 | 0.846 | 0.86 | 1 | HC_vs_MS.NoTrt_B |
| ZNF595   | 0.09263 | 0.96153 | 0.793 | 0.81 | 1 | HC_vs_MS.NoTrt_B |
| SEC14L4  | 0.09296 | 0.2953  | 0.516 | 0.48 | 1 | HC_vs_MS.NoTrt_B |
| PPP2R3B  | 0.09301 | -0.8895 | 0.445 | 0.53 | 1 | HC_vs_MS.NoTrt_B |
| CLCC1    | 0.09305 | 0.46087 | 0.793 | 0.83 | 1 | HC_vs_MS.NoTrt_B |
| PIP4K2B  | 0.09403 | -0.3213 | 0.107 | 0.15 | 1 | HC_vs_MS.NoTrt_B |
| POGLUT1  | 0.0942  | 0.64678 | 0.303 | 0.25 | 1 | HC_vs_MS.NoTrt_B |
| EFCAB12  | 0.09447 | 0.36535 | 0.745 | 0.74 | 1 | HC_vs_MS.NoTrt_B |
| COPS4    | 0.09502 | 0.25612 | 0.468 | 0.55 | 1 | HC_vs_MS.NoTrt_B |
| PIGQ     | 0.09504 | -0.6979 | 0.403 | 0.44 | 1 | HC_vs_MS.NoTrt_B |
| HLA-DRB3 | 0.09523 | -0.4742 | 0.093 | 0.14 | 1 | HC_vs_MS.NoTrt_B |
| ZNF396   | 0.09527 | 0.26912 | 0.867 | 0.9  | 1 | HC_vs_MS.NoTrt_B |
| ZNF180   | 0.09535 | -0.2736 | 0.332 | 0.27 | 1 | HC_vs_MS.NoTrt_B |
| TMTC4    | 0.09547 | -0.472  | 0.075 | 0.11 | 1 | HC_vs_MS.NoTrt_B |
| F2R      | 0.09556 | -0.4436 | 0.525 | 0.49 | 1 | HC_vs_MS.NoTrt_B |
| TANGO2   | 0.09559 | -0.6114 | 0.841 | 0.85 | 1 | HC_vs_MS.NoTrt_B |
| ACYP1    | 0.09566 | 0.33972 | 0.204 | 0.27 | 1 | HC_vs_MS.NoTrt_B |
| MYO15B   | 0.09571 | -0.2657 | 0.217 | 0.27 | 1 | HC_vs_MS.NoTrt_B |
| C22orf29 | 0.09591 | -0.2842 | 0.367 | 0.42 | 1 | HC_vs_MS.NoTrt_B |
| APLP1    | 0.09598 | 0.27878 | 0.62  | 0.64 | 1 | HC_vs_MS.NoTrt_B |
| DNAJC12  | 0.09635 | 0.26007 | 0.367 | 0.33 | 1 | HC_vs_MS.NoTrt_B |
| MUTYH    | 0.09637 | -0.4343 | 0.514 | 0.58 | 1 | HC_vs_MS.NoTrt_B |
| C20orf27 | 0.09639 | -0.3667 | 0.067 | 0.1  | 1 | HC_vs_MS.NoTrt_B |
| ALDH1B1  | 0.09663 | 1.08471 | 0.591 | 0.59 | 1 | HC_vs_MS.NoTrt_B |
| IKBKE    | 0.09675 | -0.4285 | 0.293 | 0.35 | 1 | HC_vs_MS.NoTrt_B |
| ANXA1    | 0.09698 | 0.6778  | 0.178 | 0.13 | 1 | HC_vs_MS.NoTrt_B |
| FLCN     | 0.09717 | 0.73206 | 0.859 | 0.86 | 1 | HC_vs_MS.NoTrt_B |
| MIER2    | 0.0972  | -0.372  | 0.529 | 0.45 | 1 | HC_vs_MS.NoTrt_B |
| FAXC     | 0.09746 | 0.32746 | 0.325 | 0.28 | 1 | HC_vs_MS.NoTrt_B |
| ERGIC1   | 0.09756 | 0.41482 | 0.828 | 0.86 | 1 | HC_vs_MS.NoTrt_B |
| SEMA6B   | 0.09757 | 0.25245 | 0.886 | 0.89 | 1 | HC_vs_MS.NoTrt_B |
| C2orf81  | 0.09761 | 0.26727 | 0.835 | 0.87 | 1 | HC_vs_MS.NoTrt_B |
| MAPK6    | 0.09792 | 0.35946 | 0.446 | 0.54 | 1 | HC_vs_MS.NoTrt_B |
| SPATA21  | 0.09819 | -0.2766 | 0.433 | 0.5  | 1 | HC_vs_MS.NoTrt_B |
| SMARCD1  | 0.09825 | 0.46127 | 0.132 | 0.18 | 1 | HC_vs_MS.NoTrt_B |
| NHLRC3   | 0.09827 | 0.26658 | 0.37  | 0.44 | 1 | HC_vs_MS.NoTrt_B |
| PIBF1    | 0.0984  | 0.2865  | 0.128 | 0.18 | 1 | HC_vs_MS.NoTrt_B |
| PARP12   | 0.09857 | 0.31431 | 0.245 | 0.18 | 1 | HC_vs_MS.NoTrt_B |
| MROH7    | 0.09877 | 0.31538 | 0.464 | 0.43 | 1 | HC_vs_MS.NoTrt_B |

|           |         |         |       |      |   |                  |
|-----------|---------|---------|-------|------|---|------------------|
| DPYSL5    | 0.09882 | 0.37816 | 0.591 | 0.59 | 1 | HC_vs_MS.NoTrt_B |
| KIFC3     | 0.09907 | 0.42328 | 0.67  | 0.67 | 1 | HC_vs_MS.NoTrt_B |
| LYRM2     | 0.09918 | -0.3444 | 0.83  | 0.81 | 1 | HC_vs_MS.NoTrt_B |
| GJB4      | 0.09923 | 0.4029  | 0.651 | 0.63 | 1 | HC_vs_MS.NoTrt_B |
| FAM65B    | 0.09959 | 0.49624 | 0.7   | 0.67 | 1 | HC_vs_MS.NoTrt_B |
| ITFG1     | 0.09979 | 0.42495 | 0.174 | 0.23 | 1 | HC_vs_MS.NoTrt_B |
| AIPL1     | 0.09982 | 0.29671 | 0.365 | 0.32 | 1 | HC_vs_MS.NoTrt_B |
| LRRN2     | 0.10007 | 1.10474 | 0.23  | 0.18 | 1 | HC_vs_MS.NoTrt_B |
| FUT2      | 0.1001  | 0.408   | 0.741 | 0.76 | 1 | HC_vs_MS.NoTrt_B |
| EVL       | 0.10027 | 0.33705 | 0.836 | 0.89 | 1 | HC_vs_MS.NoTrt_B |
| RB1       | 0.10028 | 0.26704 | 0.125 | 0.17 | 1 | HC_vs_MS.NoTrt_B |
| ZNF613    | 0.10028 | -0.2983 | 0.413 | 0.49 | 1 | HC_vs_MS.NoTrt_B |
| GPA33     | 0.1004  | 0.93459 | 0.146 | 0.1  | 1 | HC_vs_MS.NoTrt_B |
| UTY       | 0.10043 | -1.2223 | 0.422 | 0.47 | 1 | HC_vs_MS.NoTrt_B |
| ARHGAP11A | 0.10082 | -0.481  | 0.37  | 0.44 | 1 | HC_vs_MS.NoTrt_B |
| PGBD2     | 0.1011  | 0.61391 | 0.301 | 0.25 | 1 | HC_vs_MS.NoTrt_B |
| BMPR2     | 0.10129 | 0.28051 | 0.445 | 0.52 | 1 | HC_vs_MS.NoTrt_B |
| MTHFSD    | 0.10133 | -0.2871 | 0.075 | 0.11 | 1 | HC_vs_MS.NoTrt_B |
| ATP1A3    | 0.10135 | 0.4371  | 0.361 | 0.31 | 1 | HC_vs_MS.NoTrt_B |
| ATP13A3   | 0.10138 | 0.56008 | 0.104 | 0.15 | 1 | HC_vs_MS.NoTrt_B |
| AGO2      | 0.10141 | 0.69763 | 0.413 | 0.37 | 1 | HC_vs_MS.NoTrt_B |
| EIF2S3    | 0.10148 | 0.35501 | 0.954 | 0.95 | 1 | HC_vs_MS.NoTrt_B |
| KRT8      | 0.10173 | 0.28215 | 0.822 | 0.79 | 1 | HC_vs_MS.NoTrt_B |
| PUS1      | 0.10175 | 0.51663 | 0.855 | 0.88 | 1 | HC_vs_MS.NoTrt_B |
| RORC      | 0.10202 | -1.3053 | 0.077 | 0.11 | 1 | HC_vs_MS.NoTrt_B |
| TRIM16    | 0.10205 | -1.1063 | 0.438 | 0.48 | 1 | HC_vs_MS.NoTrt_B |
| CYP2C9    | 0.10212 | 0.27148 | 0.588 | 0.58 | 1 | HC_vs_MS.NoTrt_B |
| LARP7     | 0.10212 | 0.3069  | 0.172 | 0.23 | 1 | HC_vs_MS.NoTrt_B |
| TCTEX1D2  | 0.10238 | -0.2528 | 0.27  | 0.33 | 1 | HC_vs_MS.NoTrt_B |
| HYDIN     | 0.10251 | 0.81444 | 0.299 | 0.24 | 1 | HC_vs_MS.NoTrt_B |
| ZNF497    | 0.10283 | 0.29534 | 0.268 | 0.33 | 1 | HC_vs_MS.NoTrt_B |
| SSH1      | 0.10317 | 0.44    | 0.846 | 0.8  | 1 | HC_vs_MS.NoTrt_B |
| RRAGD     | 0.10321 | 0.74887 | 0.119 | 0.17 | 1 | HC_vs_MS.NoTrt_B |
| AP4B1     | 0.10325 | 0.33046 | 0.622 | 0.61 | 1 | HC_vs_MS.NoTrt_B |
| SRSF12    | 0.10327 | 0.43941 | 0.297 | 0.24 | 1 | HC_vs_MS.NoTrt_B |
| LINC00961 | 0.10331 | 0.49932 | 0.297 | 0.25 | 1 | HC_vs_MS.NoTrt_B |
| NABP2     | 0.1035  | -0.7732 | 0.412 | 0.49 | 1 | HC_vs_MS.NoTrt_B |
| AKAP7     | 0.10364 | 0.69239 | 0.5   | 0.47 | 1 | HC_vs_MS.NoTrt_B |
| CCNK      | 0.10364 | 0.32601 | 0.222 | 0.29 | 1 | HC_vs_MS.NoTrt_B |
| NDUFA3    | 0.10392 | 0.34404 | 0.946 | 0.92 | 1 | HC_vs_MS.NoTrt_B |



|          |         |         |       |      |   |                  |
|----------|---------|---------|-------|------|---|------------------|
| MAVS     | 0.10398 | 0.6079  | 0.935 | 0.96 | 1 | HC_vs_MS.NoTrt_B |
| SMARCA5  | 0.10408 | 0.32079 | 0.328 | 0.4  | 1 | HC_vs_MS.NoTrt_B |
| HIST1H1E | 0.10424 | 0.67556 | 0.11  | 0.07 | 1 | HC_vs_MS.NoTrt_B |
| RAB3B    | 0.10431 | 0.31812 | 0.745 | 0.72 | 1 | HC_vs_MS.NoTrt_B |
| TTC6     | 0.105   | 0.37552 | 0.286 | 0.24 | 1 | HC_vs_MS.NoTrt_B |
| DNASE1L3 | 0.10513 | 0.34737 | 0.397 | 0.35 | 1 | HC_vs_MS.NoTrt_B |
| ANKIB1   | 0.10536 | 0.50165 | 0.304 | 0.37 | 1 | HC_vs_MS.NoTrt_B |
| PPFIA1   | 0.10551 | 0.28913 | 0.657 | 0.64 | 1 | HC_vs_MS.NoTrt_B |
| SLC38A10 | 0.10585 | 0.30145 | 0.304 | 0.38 | 1 | HC_vs_MS.NoTrt_B |
| HSD17B13 | 0.10591 | 0.47621 | 0.57  | 0.54 | 1 | HC_vs_MS.NoTrt_B |
| C1orf131 | 0.10592 | -0.5764 | 0.575 | 0.67 | 1 | HC_vs_MS.NoTrt_B |
| ICA1L    | 0.10596 | 0.4346  | 0.739 | 0.71 | 1 | HC_vs_MS.NoTrt_B |
| SLC25A4  | 0.10601 | -0.4469 | 0.272 | 0.35 | 1 | HC_vs_MS.NoTrt_B |
| MCRIP2   | 0.10624 | 0.49122 | 0.561 | 0.51 | 1 | HC_vs_MS.NoTrt_B |
| ZNF345   | 0.1063  | 0.33474 | 0.814 | 0.85 | 1 | HC_vs_MS.NoTrt_B |
| UIMC1    | 0.10646 | 0.57756 | 0.813 | 0.82 | 1 | HC_vs_MS.NoTrt_B |
| USP47    | 0.10649 | 0.29392 | 0.206 | 0.27 | 1 | HC_vs_MS.NoTrt_B |
| DEAF1    | 0.10651 | 0.58383 | 0.296 | 0.36 | 1 | HC_vs_MS.NoTrt_B |
| U2AF1    | 0.10661 | -0.3799 | 0.535 | 0.56 | 1 | HC_vs_MS.NoTrt_B |
| PNMAL1   | 0.10706 | 0.26456 | 0.428 | 0.38 | 1 | HC_vs_MS.NoTrt_B |
| RNF2     | 0.10737 | -0.3018 | 0.367 | 0.45 | 1 | HC_vs_MS.NoTrt_B |
| HNRNPUL1 | 0.10768 | 0.8828  | 0.688 | 0.68 | 1 | HC_vs_MS.NoTrt_B |
| ARFGAP2  | 0.10773 | -0.372  | 0.525 | 0.6  | 1 | HC_vs_MS.NoTrt_B |
| PFKL     | 0.10784 | -0.3313 | 0.729 | 0.73 | 1 | HC_vs_MS.NoTrt_B |
| RUFY3    | 0.10796 | 0.43588 | 0.545 | 0.51 | 1 | HC_vs_MS.NoTrt_B |
| KCNMB1   | 0.10828 | 0.27876 | 0.69  | 0.7  | 1 | HC_vs_MS.NoTrt_B |
| MKRN3    | 0.10905 | 1.08034 | 0.452 | 0.4  | 1 | HC_vs_MS.NoTrt_B |
| ACADS    | 0.10943 | -0.3134 | 0.077 | 0.11 | 1 | HC_vs_MS.NoTrt_B |
| TMEM205  | 0.10949 | -0.3037 | 0.068 | 0.1  | 1 | HC_vs_MS.NoTrt_B |
| DYX1C1   | 0.10973 | 0.37078 | 0.455 | 0.43 | 1 | HC_vs_MS.NoTrt_B |
| CSAD     | 0.1098  | 0.62516 | 0.806 | 0.81 | 1 | HC_vs_MS.NoTrt_B |
| ZNF280D  | 0.10982 | 0.7452  | 0.214 | 0.17 | 1 | HC_vs_MS.NoTrt_B |
| MEIOC    | 0.11026 | 0.3828  | 0.645 | 0.61 | 1 | HC_vs_MS.NoTrt_B |
| DCUN1D4  | 0.11028 | 0.65476 | 0.249 | 0.31 | 1 | HC_vs_MS.NoTrt_B |
| AIMP2    | 0.11048 | -0.8221 | 0.304 | 0.36 | 1 | HC_vs_MS.NoTrt_B |
| ANGPT2   | 0.11055 | 0.40045 | 0.726 | 0.71 | 1 | HC_vs_MS.NoTrt_B |
| DFFB     | 0.11066 | 0.33186 | 0.807 | 0.79 | 1 | HC_vs_MS.NoTrt_B |
| USP25    | 0.11069 | 0.52383 | 0.449 | 0.54 | 1 | HC_vs_MS.NoTrt_B |
| ZNF622   | 0.11072 | -0.2527 | 0.081 | 0.12 | 1 | HC_vs_MS.NoTrt_B |
| CCHCR1   | 0.11093 | -0.9863 | 0.293 | 0.36 | 1 | HC_vs_MS.NoTrt_B |

|           |         |         |       |      |   |                  |
|-----------|---------|---------|-------|------|---|------------------|
| DHRS3     | 0.11093 | 0.54036 | 0.229 | 0.18 | 1 | HC_vs_MS.NoTrt_B |
| TUFT1     | 0.11139 | 0.36595 | 0.349 | 0.44 | 1 | HC_vs_MS.NoTrt_B |
| CEP70     | 0.11145 | 0.32712 | 0.123 | 0.17 | 1 | HC_vs_MS.NoTrt_B |
| CLCN2     | 0.11158 | 0.38855 | 0.643 | 0.64 | 1 | HC_vs_MS.NoTrt_B |
| MICAL3    | 0.11205 | 0.3687  | 0.791 | 0.8  | 1 | HC_vs_MS.NoTrt_B |
| CORO7-PAM | 0.11215 | -0.4498 | 0.104 | 0.15 | 1 | HC_vs_MS.NoTrt_B |
| THAP9     | 0.11226 | 0.47455 | 0.587 | 0.6  | 1 | HC_vs_MS.NoTrt_B |
| PHKA2     | 0.11248 | 0.36273 | 0.599 | 0.67 | 1 | HC_vs_MS.NoTrt_B |
| RDH5      | 0.11254 | -0.4448 | 0.442 | 0.51 | 1 | HC_vs_MS.NoTrt_B |
| PCGF1     | 0.11256 | -0.3376 | 0.372 | 0.44 | 1 | HC_vs_MS.NoTrt_B |
| FGD2      | 0.11331 | 0.25568 | 0.703 | 0.71 | 1 | HC_vs_MS.NoTrt_B |
| SEPSECS   | 0.11332 | 0.82252 | 0.758 | 0.8  | 1 | HC_vs_MS.NoTrt_B |
| PAFAH1B3  | 0.11347 | -0.3163 | 0.072 | 0.11 | 1 | HC_vs_MS.NoTrt_B |
| NPIP15    | 0.11358 | -0.3079 | 0.193 | 0.24 | 1 | HC_vs_MS.NoTrt_B |
| KMT5C     | 0.11374 | 0.44366 | 0.533 | 0.55 | 1 | HC_vs_MS.NoTrt_B |
| MCMDC2    | 0.11381 | -0.3319 | 0.419 | 0.48 | 1 | HC_vs_MS.NoTrt_B |
| CAMK2G    | 0.11384 | 0.25776 | 0.641 | 0.61 | 1 | HC_vs_MS.NoTrt_B |
| ZMYM2     | 0.1141  | -0.369  | 0.351 | 0.39 | 1 | HC_vs_MS.NoTrt_B |
| NTRK1     | 0.11417 | 0.5459  | 0.109 | 0.07 | 1 | HC_vs_MS.NoTrt_B |
| KCTD11    | 0.11422 | -0.2589 | 0.149 | 0.2  | 1 | HC_vs_MS.NoTrt_B |
| NIT1      | 0.11446 | -0.34   | 0.604 | 0.56 | 1 | HC_vs_MS.NoTrt_B |
| SOX13     | 0.11462 | 0.36861 | 0.739 | 0.75 | 1 | HC_vs_MS.NoTrt_B |
| IRAK1BP1  | 0.11465 | 0.27532 | 0.674 | 0.67 | 1 | HC_vs_MS.NoTrt_B |
| FKBP10    | 0.11466 | 0.28514 | 0.345 | 0.29 | 1 | HC_vs_MS.NoTrt_B |
| SNX1      | 0.11479 | 0.3986  | 0.733 | 0.69 | 1 | HC_vs_MS.NoTrt_B |
| CRLS1     | 0.11488 | 0.74968 | 0.417 | 0.36 | 1 | HC_vs_MS.NoTrt_B |
| C1orf127  | 0.11525 | 0.43057 | 0.272 | 0.22 | 1 | HC_vs_MS.NoTrt_B |
| TMEM138   | 0.11528 | 0.37303 | 0.855 | 0.85 | 1 | HC_vs_MS.NoTrt_B |
| ATN1      | 0.1153  | 0.79684 | 0.17  | 0.12 | 1 | HC_vs_MS.NoTrt_B |
| POLR2M    | 0.11532 | 0.41464 | 0.167 | 0.12 | 1 | HC_vs_MS.NoTrt_B |
| OLR1      | 0.11537 | 0.35244 | 0.414 | 0.37 | 1 | HC_vs_MS.NoTrt_B |
| UGDH      | 0.11544 | 0.40476 | 0.528 | 0.64 | 1 | HC_vs_MS.NoTrt_B |
| NKTR      | 0.11564 | 0.45288 | 0.849 | 0.83 | 1 | HC_vs_MS.NoTrt_B |
| BACH2     | 0.11592 | 0.68617 | 0.242 | 0.19 | 1 | HC_vs_MS.NoTrt_B |
| NET1      | 0.11597 | 0.51218 | 0.081 | 0.12 | 1 | HC_vs_MS.NoTrt_B |
| LTBP3     | 0.11653 | 0.4279  | 0.581 | 0.6  | 1 | HC_vs_MS.NoTrt_B |
| SPATA6L   | 0.11656 | 0.35667 | 0.781 | 0.78 | 1 | HC_vs_MS.NoTrt_B |
| BEST3     | 0.11668 | 0.28811 | 0.161 | 0.12 | 1 | HC_vs_MS.NoTrt_B |
| PRDX2     | 0.11687 | -0.2767 | 0.212 | 0.26 | 1 | HC_vs_MS.NoTrt_B |
| RNPS1     | 0.11704 | -0.2539 | 0.896 | 0.94 | 1 | HC_vs_MS.NoTrt_B |

|          |         |         |       |      |   |                  |
|----------|---------|---------|-------|------|---|------------------|
| ZNF574   | 0.11764 | 1.04961 | 0.316 | 0.27 | 1 | HC_vs_MS.NoTrt_B |
| SQRDL    | 0.11814 | -0.3251 | 0.133 | 0.18 | 1 | HC_vs_MS.NoTrt_B |
| DENND5A  | 0.11835 | 1.33583 | 0.225 | 0.17 | 1 | HC_vs_MS.NoTrt_B |
| TGFB1    | 0.11842 | 1.13585 | 0.316 | 0.27 | 1 | HC_vs_MS.NoTrt_B |
| LRP12    | 0.11845 | 0.29555 | 0.609 | 0.61 | 1 | HC_vs_MS.NoTrt_B |
| TYW5     | 0.1186  | 1.01036 | 0.872 | 0.91 | 1 | HC_vs_MS.NoTrt_B |
| GPAA1    | 0.11868 | 0.26088 | 0.119 | 0.17 | 1 | HC_vs_MS.NoTrt_B |
| ZNF605   | 0.11871 | 0.2599  | 0.884 | 0.86 | 1 | HC_vs_MS.NoTrt_B |
| TMEM204  | 0.11873 | 0.86817 | 0.174 | 0.13 | 1 | HC_vs_MS.NoTrt_B |
| PKD1     | 0.11899 | 1.20872 | 0.436 | 0.38 | 1 | HC_vs_MS.NoTrt_B |
| C1orf106 | 0.11911 | 0.25752 | 0.738 | 0.72 | 1 | HC_vs_MS.NoTrt_B |
| LAMC2    | 0.11922 | 0.26999 | 0.555 | 0.54 | 1 | HC_vs_MS.NoTrt_B |
| RBM7     | 0.11929 | 0.66577 | 0.674 | 0.67 | 1 | HC_vs_MS.NoTrt_B |
| ADRA1A   | 0.11951 | 0.33917 | 0.593 | 0.56 | 1 | HC_vs_MS.NoTrt_B |
| CDH3     | 0.1197  | 0.25264 | 0.846 | 0.87 | 1 | HC_vs_MS.NoTrt_B |
| VENTX    | 0.12016 | 0.29258 | 0.403 | 0.37 | 1 | HC_vs_MS.NoTrt_B |
| TRMU     | 0.12065 | 0.41418 | 0.188 | 0.25 | 1 | HC_vs_MS.NoTrt_B |
| ENDOV    | 0.12096 | 1.00245 | 0.577 | 0.54 | 1 | HC_vs_MS.NoTrt_B |
| GAPVD1   | 0.12097 | 0.45535 | 0.819 | 0.88 | 1 | HC_vs_MS.NoTrt_B |
| ZRSR2    | 0.12121 | 0.56164 | 0.739 | 0.76 | 1 | HC_vs_MS.NoTrt_B |
| TBL2     | 0.12125 | 0.30914 | 0.69  | 0.71 | 1 | HC_vs_MS.NoTrt_B |
| BLM      | 0.12133 | 0.70401 | 0.239 | 0.2  | 1 | HC_vs_MS.NoTrt_B |
| SERAC1   | 0.1214  | 0.47168 | 0.442 | 0.38 | 1 | HC_vs_MS.NoTrt_B |
| SUGP1    | 0.12142 | -0.3234 | 0.412 | 0.48 | 1 | HC_vs_MS.NoTrt_B |
| SLC25A14 | 0.12143 | -0.3089 | 0.213 | 0.27 | 1 | HC_vs_MS.NoTrt_B |
| GNG4     | 0.12157 | 0.3795  | 0.677 | 0.64 | 1 | HC_vs_MS.NoTrt_B |
| ZNF620   | 0.12187 | 0.49436 | 0.716 | 0.72 | 1 | HC_vs_MS.NoTrt_B |
| MTIF3    | 0.12215 | -0.3882 | 0.183 | 0.23 | 1 | HC_vs_MS.NoTrt_B |
| HNF1B    | 0.12262 | 0.37943 | 0.17  | 0.12 | 1 | HC_vs_MS.NoTrt_B |
| TPCN1    | 0.12262 | 0.3391  | 0.42  | 0.5  | 1 | HC_vs_MS.NoTrt_B |
| JAZF1    | 0.12281 | 0.88381 | 0.086 | 0.12 | 1 | HC_vs_MS.NoTrt_B |
| PTCHD4   | 0.12281 | 0.37632 | 0.168 | 0.12 | 1 | HC_vs_MS.NoTrt_B |
| IQSEC1   | 0.12284 | 1.36014 | 0.254 | 0.21 | 1 | HC_vs_MS.NoTrt_B |
| USP30    | 0.12306 | -0.2689 | 0.267 | 0.33 | 1 | HC_vs_MS.NoTrt_B |
| MYT1L    | 0.12317 | 0.26657 | 0.623 | 0.58 | 1 | HC_vs_MS.NoTrt_B |
| SLC13A5  | 0.12342 | 0.29422 | 0.746 | 0.77 | 1 | HC_vs_MS.NoTrt_B |
| ACAD11   | 0.12364 | -0.3676 | 0.184 | 0.23 | 1 | HC_vs_MS.NoTrt_B |
| PPRC1    | 0.12366 | 1.25316 | 0.113 | 0.08 | 1 | HC_vs_MS.NoTrt_B |
| GGCX     | 0.12388 | 0.78852 | 0.891 | 0.94 | 1 | HC_vs_MS.NoTrt_B |
| CFAP69   | 0.12396 | 0.34124 | 0.801 | 0.86 | 1 | HC_vs_MS.NoTrt_B |

|          |         |         |       |      |   |                  |
|----------|---------|---------|-------|------|---|------------------|
| SERINC5  | 0.12433 | 0.43447 | 0.899 | 0.89 | 1 | HC_vs_MS.NoTrt_B |
| RPL26L1  | 0.1244  | -0.356  | 0.112 | 0.15 | 1 | HC_vs_MS.NoTrt_B |
| PSPH     | 0.12452 | 0.36114 | 0.83  | 0.82 | 1 | HC_vs_MS.NoTrt_B |
| PEX13    | 0.12472 | 0.43304 | 0.762 | 0.76 | 1 | HC_vs_MS.NoTrt_B |
| ZNF470   | 0.125   | 0.81894 | 0.714 | 0.74 | 1 | HC_vs_MS.NoTrt_B |
| TDGF1    | 0.1251  | 0.35173 | 0.516 | 0.5  | 1 | HC_vs_MS.NoTrt_B |
| TEX10    | 0.12518 | -0.4742 | 0.465 | 0.52 | 1 | HC_vs_MS.NoTrt_B |
| SLK      | 0.12534 | 0.8597  | 0.196 | 0.15 | 1 | HC_vs_MS.NoTrt_B |
| ISCA2    | 0.12564 | -0.2584 | 0.467 | 0.54 | 1 | HC_vs_MS.NoTrt_B |
| PDLIM5   | 0.12566 | 0.69722 | 0.872 | 0.88 | 1 | HC_vs_MS.NoTrt_B |
| HSPE1    | 0.12572 | 0.28488 | 0.23  | 0.29 | 1 | HC_vs_MS.NoTrt_B |
| NCOA7    | 0.12576 | 0.49713 | 0.745 | 0.74 | 1 | HC_vs_MS.NoTrt_B |
| TIGD6    | 0.12584 | 1.65883 | 0.188 | 0.14 | 1 | HC_vs_MS.NoTrt_B |
| RTN4     | 0.12623 | 0.69711 | 0.264 | 0.22 | 1 | HC_vs_MS.NoTrt_B |
| STX3     | 0.12653 | 0.39344 | 0.377 | 0.34 | 1 | HC_vs_MS.NoTrt_B |
| PHF7     | 0.12692 | -0.68   | 0.459 | 0.54 | 1 | HC_vs_MS.NoTrt_B |
| ADGRF1   | 0.12706 | 0.35474 | 0.775 | 0.79 | 1 | HC_vs_MS.NoTrt_B |
| AMMECR1  | 0.12712 | 0.28148 | 0.132 | 0.18 | 1 | HC_vs_MS.NoTrt_B |
| MMS22L   | 0.12718 | 0.3698  | 0.909 | 0.92 | 1 | HC_vs_MS.NoTrt_B |
| MED17    | 0.12721 | 0.26665 | 0.945 | 0.97 | 1 | HC_vs_MS.NoTrt_B |
| DUSP12   | 0.12723 | -0.357  | 0.291 | 0.35 | 1 | HC_vs_MS.NoTrt_B |
| KIAA0408 | 0.12729 | 0.34496 | 0.27  | 0.22 | 1 | HC_vs_MS.NoTrt_B |
| MON1B    | 0.12746 | 0.32743 | 0.667 | 0.61 | 1 | HC_vs_MS.NoTrt_B |
| FN3KRP   | 0.12749 | -0.3525 | 0.07  | 0.1  | 1 | HC_vs_MS.NoTrt_B |
| MPI      | 0.1275  | -0.4876 | 0.513 | 0.54 | 1 | HC_vs_MS.NoTrt_B |
| PHF20    | 0.12756 | 0.31084 | 0.478 | 0.56 | 1 | HC_vs_MS.NoTrt_B |
| CD164    | 0.12767 | 0.3211  | 0.63  | 0.69 | 1 | HC_vs_MS.NoTrt_B |
| TMEM169  | 0.12772 | -0.3286 | 0.488 | 0.6  | 1 | HC_vs_MS.NoTrt_B |
| MVB12A   | 0.12801 | -0.3879 | 0.514 | 0.6  | 1 | HC_vs_MS.NoTrt_B |
| ABCB7    | 0.12806 | 0.66995 | 0.613 | 0.7  | 1 | HC_vs_MS.NoTrt_B |
| SLC23A2  | 0.12834 | -0.2851 | 0.13  | 0.17 | 1 | HC_vs_MS.NoTrt_B |
| PXYLP1   | 0.12839 | 1.32187 | 0.5   | 0.47 | 1 | HC_vs_MS.NoTrt_B |
| GTF2H4   | 0.12844 | -1.032  | 0.07  | 0.1  | 1 | HC_vs_MS.NoTrt_B |
| TBC1D9B  | 0.12847 | -0.3589 | 0.457 | 0.51 | 1 | HC_vs_MS.NoTrt_B |
| ZBTB38   | 0.12849 | 0.52149 | 0.535 | 0.61 | 1 | HC_vs_MS.NoTrt_B |
| MPPE1    | 0.1286  | -0.3003 | 0.849 | 0.87 | 1 | HC_vs_MS.NoTrt_B |
| PPIP5K2  | 0.12868 | 0.68727 | 0.809 | 0.86 | 1 | HC_vs_MS.NoTrt_B |
| GPRC5A   | 0.12911 | 0.42101 | 0.613 | 0.6  | 1 | HC_vs_MS.NoTrt_B |
| KIF6     | 0.12929 | 0.32141 | 0.849 | 0.9  | 1 | HC_vs_MS.NoTrt_B |
| LPAR3    | 0.12938 | 0.26472 | 0.393 | 0.35 | 1 | HC_vs_MS.NoTrt_B |

|            |         |         |       |      |   |                  |
|------------|---------|---------|-------|------|---|------------------|
| SLC9A4     | 0.12986 | 0.44562 | 0.483 | 0.47 | 1 | HC_vs_MS.NoTrt_B |
| LRRRC37B   | 0.12989 | 0.33369 | 0.619 | 0.59 | 1 | HC_vs_MS.NoTrt_B |
| SDSL       | 0.1299  | 0.74129 | 0.328 | 0.29 | 1 | HC_vs_MS.NoTrt_B |
| TNFRSF10A  | 0.12998 | 0.39392 | 0.567 | 0.51 | 1 | HC_vs_MS.NoTrt_B |
| TM9SF1     | 0.13008 | -0.2748 | 0.232 | 0.29 | 1 | HC_vs_MS.NoTrt_B |
| SLC4A1     | 0.13012 | 0.32668 | 0.671 | 0.67 | 1 | HC_vs_MS.NoTrt_B |
| KLHL21     | 0.13039 | -0.6143 | 0.646 | 0.7  | 1 | HC_vs_MS.NoTrt_B |
| TXLNG      | 0.1304  | 1.34226 | 0.119 | 0.08 | 1 | HC_vs_MS.NoTrt_B |
| ARID3B     | 0.13047 | 0.26767 | 0.712 | 0.69 | 1 | HC_vs_MS.NoTrt_B |
| MROH1      | 0.13058 | 0.26195 | 0.499 | 0.43 | 1 | HC_vs_MS.NoTrt_B |
| ZNF121     | 0.13074 | 0.25619 | 0.878 | 0.9  | 1 | HC_vs_MS.NoTrt_B |
| CLASP2     | 0.13092 | 0.88919 | 0.7   | 0.71 | 1 | HC_vs_MS.NoTrt_B |
| RIN1       | 0.13092 | -0.4424 | 0.197 | 0.25 | 1 | HC_vs_MS.NoTrt_B |
| KIN        | 0.13121 | 0.31301 | 0.72  | 0.74 | 1 | HC_vs_MS.NoTrt_B |
| WNT2B      | 0.13124 | 0.83225 | 0.455 | 0.41 | 1 | HC_vs_MS.NoTrt_B |
| PLEKHD1    | 0.13128 | 0.38255 | 0.706 | 0.7  | 1 | HC_vs_MS.NoTrt_B |
| BCL7A      | 0.13137 | 0.39502 | 0.649 | 0.64 | 1 | HC_vs_MS.NoTrt_B |
| TRPM8      | 0.13155 | 0.25669 | 0.659 | 0.67 | 1 | HC_vs_MS.NoTrt_B |
| SELK       | 0.13159 | -0.3247 | 0.342 | 0.38 | 1 | HC_vs_MS.NoTrt_B |
| RYK        | 0.13161 | 1.16785 | 0.071 | 0.11 | 1 | HC_vs_MS.NoTrt_B |
| FAH        | 0.13174 | 0.39612 | 0.141 | 0.19 | 1 | HC_vs_MS.NoTrt_B |
| SLC36A2    | 0.13178 | 0.3551  | 0.619 | 0.67 | 1 | HC_vs_MS.NoTrt_B |
| INTS6      | 0.13203 | 0.32651 | 0.928 | 0.94 | 1 | HC_vs_MS.NoTrt_B |
| FCRL5      | 0.13206 | 0.53365 | 0.472 | 0.46 | 1 | HC_vs_MS.NoTrt_B |
| DEDD       | 0.13211 | 0.28961 | 0.125 | 0.17 | 1 | HC_vs_MS.NoTrt_B |
| TNFRSF11A  | 0.13213 | 0.88842 | 0.228 | 0.18 | 1 | HC_vs_MS.NoTrt_B |
| PAXIP1     | 0.13237 | -0.5899 | 0.435 | 0.5  | 1 | HC_vs_MS.NoTrt_B |
| DECR2      | 0.13253 | 0.52514 | 0.801 | 0.8  | 1 | HC_vs_MS.NoTrt_B |
| DRC3       | 0.13262 | 0.40144 | 0.591 | 0.54 | 1 | HC_vs_MS.NoTrt_B |
| OSMR       | 0.13298 | 0.39469 | 0.49  | 0.46 | 1 | HC_vs_MS.NoTrt_B |
| RNF144A    | 0.13315 | 0.89957 | 0.196 | 0.15 | 1 | HC_vs_MS.NoTrt_B |
| FOSB       | 0.13328 | 0.4701  | 0.186 | 0.24 | 1 | HC_vs_MS.NoTrt_B |
| CTD-3105H1 | 0.13336 | 0.48399 | 0.293 | 0.24 | 1 | HC_vs_MS.NoTrt_B |
| TRMT10B    | 0.1334  | 0.55296 | 0.851 | 0.87 | 1 | HC_vs_MS.NoTrt_B |
| ZCCHC10    | 0.1335  | 0.35432 | 0.586 | 0.56 | 1 | HC_vs_MS.NoTrt_B |
| EPB41      | 0.1335  | 0.57068 | 0.454 | 0.59 | 1 | HC_vs_MS.NoTrt_B |
| GATA3      | 0.1339  | 0.4762  | 0.246 | 0.32 | 1 | HC_vs_MS.NoTrt_B |
| AC138517.6 | 0.1347  | 0.97104 | 0.081 | 0.12 | 1 | HC_vs_MS.NoTrt_B |
| ATP5A1     | 0.13473 | -0.3069 | 0.996 | 1    | 1 | HC_vs_MS.NoTrt_B |
| DENND1A    | 0.13482 | 0.55098 | 0.435 | 0.38 | 1 | HC_vs_MS.NoTrt_B |

|          |         |         |       |      |   |                  |
|----------|---------|---------|-------|------|---|------------------|
| MGAT5    | 0.13489 | -0.4794 | 0.143 | 0.18 | 1 | HC_vs_MS.NoTrt_B |
| MS4A2    | 0.1349  | 0.2635  | 0.555 | 0.62 | 1 | HC_vs_MS.NoTrt_B |
| CACNG8   | 0.13498 | 0.2597  | 0.751 | 0.76 | 1 | HC_vs_MS.NoTrt_B |
| FAM193A  | 0.13499 | 0.99963 | 0.332 | 0.29 | 1 | HC_vs_MS.NoTrt_B |
| ATRNL1   | 0.13513 | 0.31156 | 0.354 | 0.33 | 1 | HC_vs_MS.NoTrt_B |
| TTPAL    | 0.13517 | 0.35723 | 0.791 | 0.8  | 1 | HC_vs_MS.NoTrt_B |
| CD24     | 0.13529 | 0.35441 | 0.352 | 0.3  | 1 | HC_vs_MS.NoTrt_B |
| SH3PXD2A | 0.13535 | 0.34975 | 0.314 | 0.27 | 1 | HC_vs_MS.NoTrt_B |
| TMEM132A | 0.13539 | 0.50486 | 0.384 | 0.37 | 1 | HC_vs_MS.NoTrt_B |
| MRRF     | 0.13546 | 0.74483 | 0.625 | 0.6  | 1 | HC_vs_MS.NoTrt_B |
| TACO1    | 0.13558 | 1.08993 | 0.37  | 0.32 | 1 | HC_vs_MS.NoTrt_B |
| GOLGA5   | 0.13615 | -0.2527 | 0.084 | 0.12 | 1 | HC_vs_MS.NoTrt_B |
| SAA2     | 0.13637 | 0.3181  | 0.396 | 0.35 | 1 | HC_vs_MS.NoTrt_B |
| UBAP2    | 0.13669 | 0.63851 | 0.686 | 0.69 | 1 | HC_vs_MS.NoTrt_B |
| AIM1     | 0.13682 | -0.2775 | 0.486 | 0.55 | 1 | HC_vs_MS.NoTrt_B |
| ZBTB33   | 0.13685 | 0.3886  | 0.083 | 0.12 | 1 | HC_vs_MS.NoTrt_B |
| SLC8A1   | 0.137   | -0.3837 | 0.304 | 0.24 | 1 | HC_vs_MS.NoTrt_B |
| NSMCE4A  | 0.13712 | -0.4346 | 0.32  | 0.37 | 1 | HC_vs_MS.NoTrt_B |
| SARNP    | 0.13756 | -0.277  | 0.559 | 0.61 | 1 | HC_vs_MS.NoTrt_B |
| PPP1CC   | 0.13769 | 0.38871 | 0.764 | 0.75 | 1 | HC_vs_MS.NoTrt_B |
| NRIP3    | 0.13773 | 0.34316 | 0.483 | 0.45 | 1 | HC_vs_MS.NoTrt_B |
| DOCK10   | 0.1379  | 0.31805 | 0.599 | 0.68 | 1 | HC_vs_MS.NoTrt_B |
| NOM1     | 0.13872 | 0.37595 | 0.614 | 0.58 | 1 | HC_vs_MS.NoTrt_B |
| KLHL12   | 0.13878 | -0.2803 | 0.075 | 0.11 | 1 | HC_vs_MS.NoTrt_B |
| MRPS2    | 0.13882 | -0.2519 | 0.074 | 0.11 | 1 | HC_vs_MS.NoTrt_B |
| DHX38    | 0.13928 | -0.2518 | 0.08  | 0.11 | 1 | HC_vs_MS.NoTrt_B |
| FAM186A  | 0.13929 | 0.40679 | 0.407 | 0.37 | 1 | HC_vs_MS.NoTrt_B |
| SLC35D1  | 0.13934 | 0.81142 | 0.27  | 0.35 | 1 | HC_vs_MS.NoTrt_B |
| TMEM150C | 0.13944 | 0.28838 | 0.541 | 0.5  | 1 | HC_vs_MS.NoTrt_B |
| BRDT     | 0.13964 | 0.28568 | 0.546 | 0.52 | 1 | HC_vs_MS.NoTrt_B |
| WBP2NL   | 0.14009 | 0.56909 | 0.384 | 0.34 | 1 | HC_vs_MS.NoTrt_B |
| MCTP2    | 0.1401  | 0.62349 | 0.426 | 0.41 | 1 | HC_vs_MS.NoTrt_B |
| GSTM3    | 0.14023 | 0.6664  | 0.506 | 0.46 | 1 | HC_vs_MS.NoTrt_B |
| NOL12    | 0.14032 | -0.2805 | 0.483 | 0.42 | 1 | HC_vs_MS.NoTrt_B |
| SP2      | 0.14046 | 0.40724 | 0.3   | 0.37 | 1 | HC_vs_MS.NoTrt_B |
| MT-CYB   | 0.14058 | 0.32931 | 0.738 | 0.76 | 1 | HC_vs_MS.NoTrt_B |
| SMARCB1  | 0.14074 | -0.2654 | 0.436 | 0.47 | 1 | HC_vs_MS.NoTrt_B |
| FAM136A  | 0.14146 | -0.3518 | 0.288 | 0.35 | 1 | HC_vs_MS.NoTrt_B |
| STAMBPL1 | 0.14168 | 0.4541  | 0.507 | 0.48 | 1 | HC_vs_MS.NoTrt_B |
| CTCF     | 0.14184 | 0.2698  | 0.825 | 0.87 | 1 | HC_vs_MS.NoTrt_B |

|            |         |         |       |      |   |                  |
|------------|---------|---------|-------|------|---|------------------|
| HLA-DRA    | 0.14209 | -0.8158 | 0.116 | 0.15 | 1 | HC_vs_MS.NoTrt_B |
| FMNL2      | 0.14222 | -0.2585 | 0.248 | 0.3  | 1 | HC_vs_MS.NoTrt_B |
| SMDT1      | 0.14251 | 0.31262 | 0.21  | 0.27 | 1 | HC_vs_MS.NoTrt_B |
| CATSPERG   | 0.14265 | 0.28215 | 0.893 | 0.91 | 1 | HC_vs_MS.NoTrt_B |
| NME9       | 0.14271 | 0.90198 | 0.201 | 0.16 | 1 | HC_vs_MS.NoTrt_B |
| PARK2      | 0.14272 | 0.67599 | 0.604 | 0.57 | 1 | HC_vs_MS.NoTrt_B |
| FAAP20     | 0.14298 | 0.63827 | 0.865 | 0.86 | 1 | HC_vs_MS.NoTrt_B |
| AL078584.1 | 0.14312 | -0.4255 | 0.409 | 0.47 | 1 | HC_vs_MS.NoTrt_B |
| LDHC       | 0.14314 | 0.35526 | 0.184 | 0.14 | 1 | HC_vs_MS.NoTrt_B |
| THOP1      | 0.14353 | -0.5165 | 0.332 | 0.41 | 1 | HC_vs_MS.NoTrt_B |
| AURKB      | 0.14359 | -0.3822 | 0.423 | 0.38 | 1 | HC_vs_MS.NoTrt_B |
| PSTPIP2    | 0.14383 | -0.283  | 0.342 | 0.44 | 1 | HC_vs_MS.NoTrt_B |
| PSMG3      | 0.14391 | 0.27887 | 0.593 | 0.69 | 1 | HC_vs_MS.NoTrt_B |
| PCDHGA6    | 0.14457 | 0.26064 | 0.729 | 0.78 | 1 | HC_vs_MS.NoTrt_B |
| DDX54      | 0.14457 | -0.2509 | 0.099 | 0.14 | 1 | HC_vs_MS.NoTrt_B |
| GRAMD1C    | 0.14564 | 0.44523 | 0.184 | 0.14 | 1 | HC_vs_MS.NoTrt_B |
| CEP126     | 0.14566 | 0.66726 | 0.726 | 0.73 | 1 | HC_vs_MS.NoTrt_B |
| HNF4G      | 0.14578 | 0.35405 | 0.333 | 0.3  | 1 | HC_vs_MS.NoTrt_B |
| PHGDH      | 0.14599 | 0.34479 | 0.241 | 0.2  | 1 | HC_vs_MS.NoTrt_B |
| KMT2A      | 0.14632 | 0.41219 | 0.943 | 0.93 | 1 | HC_vs_MS.NoTrt_B |
| PRR14      | 0.14641 | 0.73818 | 0.114 | 0.16 | 1 | HC_vs_MS.NoTrt_B |
| EML1       | 0.1465  | 0.31984 | 0.719 | 0.75 | 1 | HC_vs_MS.NoTrt_B |
| PILRB      | 0.14672 | -0.6662 | 0.419 | 0.44 | 1 | HC_vs_MS.NoTrt_B |
| ZMYM1      | 0.14685 | 1.06021 | 0.549 | 0.51 | 1 | HC_vs_MS.NoTrt_B |
| LMBR1      | 0.14696 | 0.56427 | 0.507 | 0.48 | 1 | HC_vs_MS.NoTrt_B |
| P2RX7      | 0.14703 | 0.30807 | 0.749 | 0.75 | 1 | HC_vs_MS.NoTrt_B |
| ZGRF1      | 0.14703 | 0.75681 | 0.755 | 0.78 | 1 | HC_vs_MS.NoTrt_B |
| PJA2       | 0.14788 | 0.47116 | 0.219 | 0.28 | 1 | HC_vs_MS.NoTrt_B |
| C3orf62    | 0.1482  | 0.7283  | 0.758 | 0.77 | 1 | HC_vs_MS.NoTrt_B |
| SFXN2      | 0.14822 | 0.63162 | 0.935 | 0.9  | 1 | HC_vs_MS.NoTrt_B |
| NIPAL3     | 0.14824 | 0.2991  | 0.765 | 0.77 | 1 | HC_vs_MS.NoTrt_B |
| PMPCA      | 0.14842 | -0.2829 | 0.675 | 0.76 | 1 | HC_vs_MS.NoTrt_B |
| DTWD2      | 0.14858 | 0.37699 | 0.743 | 0.76 | 1 | HC_vs_MS.NoTrt_B |
| NR1H3      | 0.14875 | 0.88006 | 0.112 | 0.15 | 1 | HC_vs_MS.NoTrt_B |
| MAGOHB     | 0.14886 | 0.76436 | 0.078 | 0.11 | 1 | HC_vs_MS.NoTrt_B |
| DMWD       | 0.14905 | 0.34961 | 0.836 | 0.85 | 1 | HC_vs_MS.NoTrt_B |
| MTCH2      | 0.14913 | -0.4648 | 0.1   | 0.14 | 1 | HC_vs_MS.NoTrt_B |
| NFKB2      | 0.14971 | 0.37178 | 0.341 | 0.43 | 1 | HC_vs_MS.NoTrt_B |
| ACSF2      | 0.14982 | -0.3476 | 0.47  | 0.44 | 1 | HC_vs_MS.NoTrt_B |
| AFAP1      | 0.14991 | 0.54864 | 0.391 | 0.35 | 1 | HC_vs_MS.NoTrt_B |

|             |         |         |       |      |   |                  |
|-------------|---------|---------|-------|------|---|------------------|
| CALB1       | 0.14996 | 0.44443 | 0.151 | 0.11 | 1 | HC_vs_MS.NoTrt_B |
| IKZF1       | 0.15009 | 0.27161 | 0.348 | 0.43 | 1 | HC_vs_MS.NoTrt_B |
| ZNF592      | 0.1501  | 0.34089 | 0.167 | 0.22 | 1 | HC_vs_MS.NoTrt_B |
| RIOK2       | 0.15042 | 0.79101 | 0.319 | 0.27 | 1 | HC_vs_MS.NoTrt_B |
| GOLGA8R     | 0.15058 | 0.4096  | 0.439 | 0.53 | 1 | HC_vs_MS.NoTrt_B |
| SPECC1L     | 0.1506  | 0.87681 | 0.136 | 0.1  | 1 | HC_vs_MS.NoTrt_B |
| IZUMO1      | 0.15071 | 0.26006 | 0.628 | 0.61 | 1 | HC_vs_MS.NoTrt_B |
| MRPL57      | 0.15076 | -0.2576 | 0.672 | 0.71 | 1 | HC_vs_MS.NoTrt_B |
| GALNT4      | 0.15103 | -0.3051 | 0.386 | 0.44 | 1 | HC_vs_MS.NoTrt_B |
| GGA1        | 0.15134 | 0.42988 | 0.968 | 0.97 | 1 | HC_vs_MS.NoTrt_B |
| KMT5B       | 0.15139 | 0.63144 | 0.294 | 0.24 | 1 | HC_vs_MS.NoTrt_B |
| RAB14       | 0.15203 | 0.50379 | 0.201 | 0.26 | 1 | HC_vs_MS.NoTrt_B |
| DPH3        | 0.15205 | 0.71034 | 0.238 | 0.19 | 1 | HC_vs_MS.NoTrt_B |
| SLC9A7      | 0.15245 | 0.39646 | 0.938 | 0.94 | 1 | HC_vs_MS.NoTrt_B |
| TXNL1       | 0.15275 | 0.3442  | 0.629 | 0.71 | 1 | HC_vs_MS.NoTrt_B |
| NKD1        | 0.15299 | 0.25577 | 0.394 | 0.49 | 1 | HC_vs_MS.NoTrt_B |
| TMEM130     | 0.15309 | 0.31416 | 0.661 | 0.67 | 1 | HC_vs_MS.NoTrt_B |
| DST         | 0.15313 | 0.49404 | 0.755 | 0.79 | 1 | HC_vs_MS.NoTrt_B |
| TMEM64      | 0.15319 | 0.71936 | 0.358 | 0.32 | 1 | HC_vs_MS.NoTrt_B |
| MAPK13      | 0.15321 | -0.3601 | 0.638 | 0.71 | 1 | HC_vs_MS.NoTrt_B |
| TEX35       | 0.15373 | 0.28458 | 0.312 | 0.27 | 1 | HC_vs_MS.NoTrt_B |
| BMP1        | 0.15383 | 0.35604 | 0.535 | 0.51 | 1 | HC_vs_MS.NoTrt_B |
| RP11-9J18.1 | 0.15387 | 0.54045 | 0.262 | 0.22 | 1 | HC_vs_MS.NoTrt_B |
| ACSM2A      | 0.1539  | 0.47639 | 0.467 | 0.49 | 1 | HC_vs_MS.NoTrt_B |
| EPT1        | 0.15399 | 0.27037 | 0.336 | 0.4  | 1 | HC_vs_MS.NoTrt_B |
| MGMT        | 0.15402 | -0.3011 | 0.071 | 0.1  | 1 | HC_vs_MS.NoTrt_B |
| KLHL26      | 0.15416 | 0.92262 | 0.574 | 0.57 | 1 | HC_vs_MS.NoTrt_B |
| MAATS1      | 0.15452 | 0.40674 | 0.2   | 0.25 | 1 | HC_vs_MS.NoTrt_B |
| TXNL4A      | 0.15466 | -0.6112 | 0.471 | 0.52 | 1 | HC_vs_MS.NoTrt_B |
| USP33       | 0.15536 | 0.2911  | 0.945 | 0.94 | 1 | HC_vs_MS.NoTrt_B |
| TAF4        | 0.15539 | 0.36476 | 0.123 | 0.16 | 1 | HC_vs_MS.NoTrt_B |
| ZNF672      | 0.15604 | -0.4826 | 0.236 | 0.28 | 1 | HC_vs_MS.NoTrt_B |
| CHD8        | 0.1562  | 0.41777 | 0.365 | 0.31 | 1 | HC_vs_MS.NoTrt_B |
| NFASC       | 0.15647 | 0.42038 | 0.584 | 0.59 | 1 | HC_vs_MS.NoTrt_B |
| ZNF133      | 0.15679 | -0.2831 | 0.449 | 0.41 | 1 | HC_vs_MS.NoTrt_B |
| NDUFAF5     | 0.15684 | 0.62797 | 0.538 | 0.54 | 1 | HC_vs_MS.NoTrt_B |
| AUH         | 0.15801 | -0.2517 | 0.09  | 0.12 | 1 | HC_vs_MS.NoTrt_B |
| CDKL1       | 0.15802 | 0.42444 | 0.704 | 0.68 | 1 | HC_vs_MS.NoTrt_B |
| GMCL1       | 0.15821 | 0.55972 | 0.32  | 0.38 | 1 | HC_vs_MS.NoTrt_B |
| WDR82       | 0.15824 | -0.3892 | 0.384 | 0.44 | 1 | HC_vs_MS.NoTrt_B |



|           |         |         |       |      |   |                  |
|-----------|---------|---------|-------|------|---|------------------|
| ABCB5     | 0.15846 | 0.28348 | 0.583 | 0.55 | 1 | HC_vs_MS.NoTrt_B |
| TRDMT1    | 0.1591  | 0.71832 | 0.726 | 0.74 | 1 | HC_vs_MS.NoTrt_B |
| CEP170    | 0.15925 | 0.4836  | 0.549 | 0.63 | 1 | HC_vs_MS.NoTrt_B |
| SIL1      | 0.15937 | -0.6804 | 0.077 | 0.11 | 1 | HC_vs_MS.NoTrt_B |
| RDX       | 0.15942 | -0.3105 | 0.236 | 0.29 | 1 | HC_vs_MS.NoTrt_B |
| THRA      | 0.15943 | 1.17669 | 0.142 | 0.1  | 1 | HC_vs_MS.NoTrt_B |
| TMEM267   | 0.15951 | 0.53243 | 0.286 | 0.23 | 1 | HC_vs_MS.NoTrt_B |
| LSG1      | 0.15984 | -0.5265 | 0.361 | 0.42 | 1 | HC_vs_MS.NoTrt_B |
| CCDC27    | 0.1599  | 0.29889 | 0.564 | 0.54 | 1 | HC_vs_MS.NoTrt_B |
| MTM1      | 0.16062 | -0.3775 | 0.135 | 0.17 | 1 | HC_vs_MS.NoTrt_B |
| KLF3      | 0.16073 | 0.2871  | 0.639 | 0.74 | 1 | HC_vs_MS.NoTrt_B |
| NIP7      | 0.16085 | -0.5556 | 0.606 | 0.66 | 1 | HC_vs_MS.NoTrt_B |
| MYO15A    | 0.161   | 0.28321 | 0.781 | 0.82 | 1 | HC_vs_MS.NoTrt_B |
| OLFML1    | 0.16108 | 0.4545  | 0.225 | 0.28 | 1 | HC_vs_MS.NoTrt_B |
| USP42     | 0.16135 | 0.44839 | 0.449 | 0.41 | 1 | HC_vs_MS.NoTrt_B |
| MZF1      | 0.16145 | 0.42334 | 0.084 | 0.12 | 1 | HC_vs_MS.NoTrt_B |
| ADAMTS16  | 0.16151 | 0.55923 | 0.323 | 0.29 | 1 | HC_vs_MS.NoTrt_B |
| CCDC155   | 0.16162 | -0.4621 | 0.117 | 0.16 | 1 | HC_vs_MS.NoTrt_B |
| NBPF11    | 0.16192 | 0.42472 | 0.257 | 0.32 | 1 | HC_vs_MS.NoTrt_B |
| GRPEL2    | 0.16197 | 0.33686 | 0.294 | 0.34 | 1 | HC_vs_MS.NoTrt_B |
| CRBN      | 0.16204 | 0.44642 | 0.467 | 0.55 | 1 | HC_vs_MS.NoTrt_B |
| SLA2      | 0.16225 | -0.3711 | 0.522 | 0.58 | 1 | HC_vs_MS.NoTrt_B |
| SUGP2     | 0.16249 | -0.3902 | 0.709 | 0.78 | 1 | HC_vs_MS.NoTrt_B |
| GNS       | 0.16283 | 0.82762 | 0.739 | 0.72 | 1 | HC_vs_MS.NoTrt_B |
| EPHA4     | 0.16295 | -0.3299 | 0.184 | 0.23 | 1 | HC_vs_MS.NoTrt_B |
| DNHD1     | 0.16339 | 0.90922 | 0.316 | 0.27 | 1 | HC_vs_MS.NoTrt_B |
| FLOT1     | 0.16341 | 0.70843 | 0.123 | 0.09 | 1 | HC_vs_MS.NoTrt_B |
| COQ9      | 0.1642  | -0.4364 | 0.072 | 0.1  | 1 | HC_vs_MS.NoTrt_B |
| KIDINS220 | 0.16428 | 0.30974 | 0.272 | 0.22 | 1 | HC_vs_MS.NoTrt_B |
| WDFY3     | 0.16434 | 0.25606 | 0.261 | 0.22 | 1 | HC_vs_MS.NoTrt_B |
| BRIX1     | 0.16453 | 0.3431  | 0.665 | 0.61 | 1 | HC_vs_MS.NoTrt_B |
| KCNN2     | 0.16455 | 0.3781  | 0.255 | 0.22 | 1 | HC_vs_MS.NoTrt_B |
| BMP8B     | 0.16472 | 0.43277 | 0.403 | 0.37 | 1 | HC_vs_MS.NoTrt_B |
| CFAP36    | 0.16474 | 0.35868 | 0.412 | 0.38 | 1 | HC_vs_MS.NoTrt_B |
| ZNF543    | 0.1648  | 0.5549  | 0.477 | 0.45 | 1 | HC_vs_MS.NoTrt_B |
| TSC1      | 0.16483 | -0.3599 | 0.478 | 0.55 | 1 | HC_vs_MS.NoTrt_B |
| PDE7B     | 0.16488 | 0.47923 | 0.381 | 0.34 | 1 | HC_vs_MS.NoTrt_B |
| LATS1     | 0.16491 | 0.42347 | 0.654 | 0.74 | 1 | HC_vs_MS.NoTrt_B |
| PAK6      | 0.1655  | 0.55456 | 0.155 | 0.11 | 1 | HC_vs_MS.NoTrt_B |
| CRCP      | 0.16558 | -0.4253 | 0.862 | 0.89 | 1 | HC_vs_MS.NoTrt_B |

|            |         |         |       |      |   |                  |
|------------|---------|---------|-------|------|---|------------------|
| DONSON     | 0.16564 | -0.7036 | 0.154 | 0.2  | 1 | HC_vs_MS.NoTrt_B |
| ZNF330     | 0.16569 | -0.2946 | 0.072 | 0.1  | 1 | HC_vs_MS.NoTrt_B |
| IGSF9      | 0.16577 | 0.42872 | 0.304 | 0.27 | 1 | HC_vs_MS.NoTrt_B |
| RP5-994D16 | 0.16601 | 0.35183 | 0.462 | 0.57 | 1 | HC_vs_MS.NoTrt_B |
| DDX55      | 0.16605 | 0.50224 | 0.641 | 0.71 | 1 | HC_vs_MS.NoTrt_B |
| TRIM33     | 0.16607 | 0.32576 | 0.288 | 0.34 | 1 | HC_vs_MS.NoTrt_B |
| TOB1       | 0.16617 | 0.43017 | 0.486 | 0.48 | 1 | HC_vs_MS.NoTrt_B |
| MSH3       | 0.16643 | 0.48567 | 0.42  | 0.4  | 1 | HC_vs_MS.NoTrt_B |
| DEPDC5     | 0.16674 | -0.4896 | 0.783 | 0.77 | 1 | HC_vs_MS.NoTrt_B |
| MEI1       | 0.1675  | -0.5947 | 0.725 | 0.76 | 1 | HC_vs_MS.NoTrt_B |
| SCHIP1     | 0.16758 | 0.50134 | 0.532 | 0.53 | 1 | HC_vs_MS.NoTrt_B |
| RP11-544M1 | 0.16804 | -0.5713 | 0.219 | 0.18 | 1 | HC_vs_MS.NoTrt_B |
| CNN1       | 0.16808 | 0.3363  | 0.543 | 0.54 | 1 | HC_vs_MS.NoTrt_B |
| DNAH1      | 0.16861 | 1.01269 | 0.143 | 0.11 | 1 | HC_vs_MS.NoTrt_B |
| NBPF3      | 0.16908 | 1.06006 | 0.451 | 0.44 | 1 | HC_vs_MS.NoTrt_B |
| MLH3       | 0.1691  | 0.48592 | 0.086 | 0.12 | 1 | HC_vs_MS.NoTrt_B |
| HYAL1      | 0.1692  | 0.50841 | 0.355 | 0.32 | 1 | HC_vs_MS.NoTrt_B |
| GSK3B      | 0.16924 | 0.28647 | 0.712 | 0.72 | 1 | HC_vs_MS.NoTrt_B |
| VIPR2      | 0.16925 | 0.28928 | 0.241 | 0.2  | 1 | HC_vs_MS.NoTrt_B |
| OPRM1      | 0.16945 | 0.303   | 0.836 | 0.89 | 1 | HC_vs_MS.NoTrt_B |
| AGBL2      | 0.16945 | 0.75102 | 0.299 | 0.25 | 1 | HC_vs_MS.NoTrt_B |
| AAR2       | 0.17006 | 0.86824 | 0.249 | 0.21 | 1 | HC_vs_MS.NoTrt_B |
| RNF20      | 0.17014 | -0.3771 | 0.091 | 0.12 | 1 | HC_vs_MS.NoTrt_B |
| ZNF589     | 0.17021 | -0.4921 | 0.459 | 0.52 | 1 | HC_vs_MS.NoTrt_B |
| CDK19      | 0.17022 | 1.53721 | 0.313 | 0.28 | 1 | HC_vs_MS.NoTrt_B |
| BRCC3      | 0.17024 | 0.30814 | 0.248 | 0.2  | 1 | HC_vs_MS.NoTrt_B |
| ANGEL1     | 0.17064 | -0.8915 | 0.374 | 0.42 | 1 | HC_vs_MS.NoTrt_B |
| ABCG8      | 0.17072 | 0.26584 | 0.614 | 0.62 | 1 | HC_vs_MS.NoTrt_B |
| FAM103A1   | 0.17087 | 0.30276 | 0.101 | 0.14 | 1 | HC_vs_MS.NoTrt_B |
| BRD7       | 0.17134 | 0.85991 | 0.522 | 0.52 | 1 | HC_vs_MS.NoTrt_B |
| SPINK9     | 0.17136 | 0.44546 | 0.672 | 0.75 | 1 | HC_vs_MS.NoTrt_B |
| HEXIM1     | 0.17148 | 0.41178 | 0.193 | 0.25 | 1 | HC_vs_MS.NoTrt_B |
| PIGM       | 0.17164 | -0.3613 | 0.587 | 0.54 | 1 | HC_vs_MS.NoTrt_B |
| SPAG7      | 0.17186 | -0.2931 | 0.851 | 0.88 | 1 | HC_vs_MS.NoTrt_B |
| AZU1       | 0.17238 | 0.30016 | 0.201 | 0.16 | 1 | HC_vs_MS.NoTrt_B |
| GLMP       | 0.17248 | 0.26999 | 0.755 | 0.76 | 1 | HC_vs_MS.NoTrt_B |
| GJB7       | 0.17249 | 0.78185 | 0.1   | 0.14 | 1 | HC_vs_MS.NoTrt_B |
| SNX9       | 0.17249 | 0.26201 | 0.087 | 0.12 | 1 | HC_vs_MS.NoTrt_B |
| HABP4      | 0.17264 | 0.28812 | 0.104 | 0.14 | 1 | HC_vs_MS.NoTrt_B |
| TP53BP2    | 0.1727  | 0.959   | 0.135 | 0.18 | 1 | HC_vs_MS.NoTrt_B |

|           |         |         |       |      |   |                  |
|-----------|---------|---------|-------|------|---|------------------|
| ZNF138    | 0.17275 | 1.11256 | 0.072 | 0.1  | 1 | HC_vs_MS.NoTrt_B |
| ADAMTS17  | 0.17279 | 0.45847 | 0.194 | 0.16 | 1 | HC_vs_MS.NoTrt_B |
| ATPAF2    | 0.1729  | 0.48508 | 0.465 | 0.45 | 1 | HC_vs_MS.NoTrt_B |
| IGSF6     | 0.17309 | 0.26062 | 0.626 | 0.62 | 1 | HC_vs_MS.NoTrt_B |
| THUMPD2   | 0.1732  | -0.3101 | 0.345 | 0.4  | 1 | HC_vs_MS.NoTrt_B |
| MFSD6     | 0.17329 | 0.55677 | 0.149 | 0.11 | 1 | HC_vs_MS.NoTrt_B |
| HSPB9     | 0.17336 | 0.44291 | 0.203 | 0.25 | 1 | HC_vs_MS.NoTrt_B |
| KIAA2013  | 0.17344 | -0.7327 | 0.307 | 0.36 | 1 | HC_vs_MS.NoTrt_B |
| SDF2      | 0.17357 | -0.3444 | 0.162 | 0.2  | 1 | HC_vs_MS.NoTrt_B |
| WDR97     | 0.17384 | 0.29263 | 0.474 | 0.44 | 1 | HC_vs_MS.NoTrt_B |
| LPCAT2    | 0.17389 | 0.36093 | 0.325 | 0.29 | 1 | HC_vs_MS.NoTrt_B |
| CDC20B    | 0.17393 | 0.28151 | 0.601 | 0.63 | 1 | HC_vs_MS.NoTrt_B |
| NBPF20    | 0.17406 | 0.56817 | 0.317 | 0.27 | 1 | HC_vs_MS.NoTrt_B |
| UVSSA     | 0.17419 | 0.7793  | 0.746 | 0.72 | 1 | HC_vs_MS.NoTrt_B |
| AKTIP     | 0.1744  | -0.2844 | 0.562 | 0.63 | 1 | HC_vs_MS.NoTrt_B |
| ILVBL     | 0.17443 | -0.4917 | 0.259 | 0.21 | 1 | HC_vs_MS.NoTrt_B |
| TRAF3IP1  | 0.17489 | 0.87378 | 0.371 | 0.35 | 1 | HC_vs_MS.NoTrt_B |
| CYLD      | 0.17509 | 0.42059 | 0.728 | 0.72 | 1 | HC_vs_MS.NoTrt_B |
| FOXM1     | 0.17547 | 0.41498 | 0.686 | 0.68 | 1 | HC_vs_MS.NoTrt_B |
| RAB11FIP3 | 0.17593 | 0.33924 | 0.213 | 0.17 | 1 | HC_vs_MS.NoTrt_B |
| PHLPP1    | 0.17617 | 0.28615 | 0.719 | 0.74 | 1 | HC_vs_MS.NoTrt_B |
| MAT2A     | 0.17641 | 0.30181 | 0.126 | 0.17 | 1 | HC_vs_MS.NoTrt_B |
| HEXA      | 0.17651 | -0.4042 | 0.72  | 0.76 | 1 | HC_vs_MS.NoTrt_B |
| PAQR8     | 0.17742 | 0.69033 | 0.51  | 0.47 | 1 | HC_vs_MS.NoTrt_B |
| STXBP5    | 0.17818 | 0.58483 | 0.199 | 0.16 | 1 | HC_vs_MS.NoTrt_B |
| MVB12B    | 0.17831 | 1.33183 | 0.109 | 0.08 | 1 | HC_vs_MS.NoTrt_B |
| SETD1B    | 0.17837 | 0.66269 | 0.201 | 0.16 | 1 | HC_vs_MS.NoTrt_B |
| ATP6V0D1  | 0.17914 | -0.6893 | 0.601 | 0.62 | 1 | HC_vs_MS.NoTrt_B |
| RHNO1     | 0.17918 | -0.4351 | 0.613 | 0.68 | 1 | HC_vs_MS.NoTrt_B |
| GCSAML    | 0.17927 | 0.3453  | 0.328 | 0.3  | 1 | HC_vs_MS.NoTrt_B |
| BSDC1     | 0.17927 | -0.4024 | 0.484 | 0.51 | 1 | HC_vs_MS.NoTrt_B |
| WRN       | 0.1796  | 0.45081 | 0.432 | 0.4  | 1 | HC_vs_MS.NoTrt_B |
| COPS7A    | 0.17971 | 0.25903 | 0.284 | 0.23 | 1 | HC_vs_MS.NoTrt_B |
| CPEB4     | 0.17994 | 0.51137 | 0.116 | 0.08 | 1 | HC_vs_MS.NoTrt_B |
| INTS7     | 0.18029 | 0.96999 | 0.412 | 0.36 | 1 | HC_vs_MS.NoTrt_B |
| FADS3     | 0.18041 | 0.43865 | 0.625 | 0.58 | 1 | HC_vs_MS.NoTrt_B |
| ZCCHC9    | 0.18044 | -0.4448 | 0.628 | 0.73 | 1 | HC_vs_MS.NoTrt_B |
| IKBIP     | 0.18083 | 0.4705  | 0.439 | 0.4  | 1 | HC_vs_MS.NoTrt_B |
| PLA2G4D   | 0.18101 | 0.26956 | 0.346 | 0.3  | 1 | HC_vs_MS.NoTrt_B |
| IPP       | 0.18134 | 0.46772 | 0.43  | 0.38 | 1 | HC_vs_MS.NoTrt_B |

|           |         |         |       |      |   |                  |
|-----------|---------|---------|-------|------|---|------------------|
| PCMTD1    | 0.1814  | 0.33029 | 0.275 | 0.35 | 1 | HC_vs_MS.NoTrt_B |
| YBX3      | 0.18145 | 0.32772 | 0.706 | 0.74 | 1 | HC_vs_MS.NoTrt_B |
| SHPRH     | 0.18163 | 0.59031 | 0.696 | 0.67 | 1 | HC_vs_MS.NoTrt_B |
| PLEKHA3   | 0.18187 | 0.60775 | 0.783 | 0.75 | 1 | HC_vs_MS.NoTrt_B |
| ARHGAP17  | 0.18194 | 0.25821 | 0.558 | 0.64 | 1 | HC_vs_MS.NoTrt_B |
| TIMMDC1   | 0.18219 | 0.38183 | 0.086 | 0.12 | 1 | HC_vs_MS.NoTrt_B |
| MIER1     | 0.1824  | 0.83015 | 0.707 | 0.75 | 1 | HC_vs_MS.NoTrt_B |
| GTF3C4    | 0.18262 | 0.39268 | 0.29  | 0.35 | 1 | HC_vs_MS.NoTrt_B |
| DENND5B   | 0.18264 | 0.27819 | 0.555 | 0.54 | 1 | HC_vs_MS.NoTrt_B |
| LILRB3    | 0.1827  | -0.8082 | 0.123 | 0.16 | 1 | HC_vs_MS.NoTrt_B |
| NRG4      | 0.18273 | 0.33378 | 0.667 | 0.66 | 1 | HC_vs_MS.NoTrt_B |
| C14orf1   | 0.18276 | -0.6209 | 0.259 | 0.3  | 1 | HC_vs_MS.NoTrt_B |
| C20orf144 | 0.18291 | 0.3486  | 0.362 | 0.33 | 1 | HC_vs_MS.NoTrt_B |
| KIAA0556  | 0.1832  | 0.30609 | 0.259 | 0.31 | 1 | HC_vs_MS.NoTrt_B |
| RIN3      | 0.18321 | 0.41602 | 0.401 | 0.36 | 1 | HC_vs_MS.NoTrt_B |
| UBE2S     | 0.18346 | 0.31758 | 0.652 | 0.66 | 1 | HC_vs_MS.NoTrt_B |
| PIKFYVE   | 0.18392 | 0.26627 | 0.365 | 0.42 | 1 | HC_vs_MS.NoTrt_B |
| HECTD1    | 0.18418 | 0.31732 | 0.519 | 0.62 | 1 | HC_vs_MS.NoTrt_B |
| XRCC3     | 0.18424 | 0.74558 | 0.422 | 0.38 | 1 | HC_vs_MS.NoTrt_B |
| NR4A2     | 0.18452 | 1.70569 | 0.146 | 0.11 | 1 | HC_vs_MS.NoTrt_B |
| CAMK2D    | 0.18474 | 0.3853  | 0.236 | 0.3  | 1 | HC_vs_MS.NoTrt_B |
| ADSL      | 0.18477 | 0.51279 | 0.872 | 0.82 | 1 | HC_vs_MS.NoTrt_B |
| IRF4      | 0.18513 | 0.52808 | 0.259 | 0.21 | 1 | HC_vs_MS.NoTrt_B |
| DZANK1    | 0.18538 | 0.40123 | 0.707 | 0.72 | 1 | HC_vs_MS.NoTrt_B |
| VTA1      | 0.1855  | 0.57341 | 0.33  | 0.4  | 1 | HC_vs_MS.NoTrt_B |
| CHM       | 0.18569 | 0.62473 | 0.49  | 0.44 | 1 | HC_vs_MS.NoTrt_B |
| ABHD14A   | 0.18578 | -0.3736 | 0.457 | 0.51 | 1 | HC_vs_MS.NoTrt_B |
| BORCS5    | 0.18632 | 0.68095 | 0.629 | 0.62 | 1 | HC_vs_MS.NoTrt_B |
| CCDC58    | 0.18642 | 0.4481  | 0.299 | 0.36 | 1 | HC_vs_MS.NoTrt_B |
| CD163     | 0.18645 | 0.37155 | 0.683 | 0.74 | 1 | HC_vs_MS.NoTrt_B |
| APCDD1    | 0.18674 | 0.2592  | 0.372 | 0.34 | 1 | HC_vs_MS.NoTrt_B |
| AMY2B     | 0.18679 | 0.34926 | 0.545 | 0.63 | 1 | HC_vs_MS.NoTrt_B |
| CEP120    | 0.18715 | -0.9462 | 0.094 | 0.12 | 1 | HC_vs_MS.NoTrt_B |
| PEX11G    | 0.1874  | 0.3429  | 0.126 | 0.17 | 1 | HC_vs_MS.NoTrt_B |
| INSR      | 0.18742 | 0.36699 | 0.462 | 0.44 | 1 | HC_vs_MS.NoTrt_B |
| SUZ12     | 0.1876  | 0.41455 | 0.622 | 0.61 | 1 | HC_vs_MS.NoTrt_B |
| PABPN1    | 0.18798 | 0.89793 | 0.196 | 0.16 | 1 | HC_vs_MS.NoTrt_B |
| ZC3H18    | 0.18859 | 0.41528 | 0.725 | 0.71 | 1 | HC_vs_MS.NoTrt_B |
| BRD9      | 0.18987 | 1.19297 | 0.146 | 0.11 | 1 | HC_vs_MS.NoTrt_B |
| TTC39B    | 0.19001 | 0.27357 | 0.733 | 0.71 | 1 | HC_vs_MS.NoTrt_B |

|          |         |         |       |      |   |                  |
|----------|---------|---------|-------|------|---|------------------|
| FRG2C    | 0.19006 | 0.2716  | 0.162 | 0.13 | 1 | HC_vs_MS.NoTrt_B |
| IKZF4    | 0.19011 | 0.5971  | 0.174 | 0.21 | 1 | HC_vs_MS.NoTrt_B |
| SUN3     | 0.19015 | 0.25563 | 0.387 | 0.35 | 1 | HC_vs_MS.NoTrt_B |
| ADIPOR2  | 0.19034 | -0.4818 | 0.128 | 0.16 | 1 | HC_vs_MS.NoTrt_B |
| BOD1L1   | 0.19038 | 0.8101  | 0.681 | 0.73 | 1 | HC_vs_MS.NoTrt_B |
| TEX14    | 0.19042 | 0.83681 | 0.075 | 0.11 | 1 | HC_vs_MS.NoTrt_B |
| DIEXF    | 0.19061 | 0.34803 | 0.461 | 0.41 | 1 | HC_vs_MS.NoTrt_B |
| HMGXB4   | 0.19087 | 0.31395 | 0.091 | 0.12 | 1 | HC_vs_MS.NoTrt_B |
| ZNF558   | 0.1911  | 0.31952 | 0.684 | 0.69 | 1 | HC_vs_MS.NoTrt_B |
| DARS     | 0.19117 | 0.40603 | 0.296 | 0.37 | 1 | HC_vs_MS.NoTrt_B |
| SLC38A9  | 0.19133 | 0.50828 | 0.371 | 0.45 | 1 | HC_vs_MS.NoTrt_B |
| ITGA2    | 0.19136 | 0.39188 | 0.367 | 0.33 | 1 | HC_vs_MS.NoTrt_B |
| KIAA1109 | 0.19217 | 0.40908 | 0.323 | 0.38 | 1 | HC_vs_MS.NoTrt_B |
| MAPK14   | 0.19227 | 1.27977 | 0.142 | 0.11 | 1 | HC_vs_MS.NoTrt_B |
| ZFP14    | 0.19228 | 0.54477 | 0.857 | 0.84 | 1 | HC_vs_MS.NoTrt_B |
| TEPSIN   | 0.19262 | 0.33274 | 0.104 | 0.14 | 1 | HC_vs_MS.NoTrt_B |
| RAB42    | 0.19292 | 0.3005  | 0.567 | 0.57 | 1 | HC_vs_MS.NoTrt_B |
| ZC3H12C  | 0.19308 | 0.3933  | 0.097 | 0.13 | 1 | HC_vs_MS.NoTrt_B |
| BRD4     | 0.19312 | 0.39536 | 0.351 | 0.41 | 1 | HC_vs_MS.NoTrt_B |
| SLC2A6   | 0.19316 | -0.3351 | 0.262 | 0.22 | 1 | HC_vs_MS.NoTrt_B |
| CP       | 0.1932  | 1.16136 | 0.148 | 0.11 | 1 | HC_vs_MS.NoTrt_B |
| LIPC     | 0.1937  | 1.02786 | 0.306 | 0.26 | 1 | HC_vs_MS.NoTrt_B |
| BEND6    | 0.19398 | 0.27069 | 0.197 | 0.16 | 1 | HC_vs_MS.NoTrt_B |
| BEST2    | 0.19409 | 0.2764  | 0.306 | 0.27 | 1 | HC_vs_MS.NoTrt_B |
| NDUFAF7  | 0.19422 | 0.40031 | 0.37  | 0.33 | 1 | HC_vs_MS.NoTrt_B |
| TRIM21   | 0.19427 | -0.3108 | 0.116 | 0.15 | 1 | HC_vs_MS.NoTrt_B |
| VCPIP1   | 0.19448 | 0.51994 | 0.449 | 0.41 | 1 | HC_vs_MS.NoTrt_B |
| IPO7     | 0.19482 | 0.46805 | 0.4   | 0.36 | 1 | HC_vs_MS.NoTrt_B |
| USP1     | 0.19488 | 0.40769 | 0.119 | 0.16 | 1 | HC_vs_MS.NoTrt_B |
| JUND     | 0.19539 | 0.60431 | 0.162 | 0.13 | 1 | HC_vs_MS.NoTrt_B |
| DUSP10   | 0.19544 | 0.26593 | 0.141 | 0.18 | 1 | HC_vs_MS.NoTrt_B |
| PNPLA4   | 0.19554 | -0.3253 | 0.284 | 0.34 | 1 | HC_vs_MS.NoTrt_B |
| UQCC2    | 0.19573 | -0.323  | 0.074 | 0.1  | 1 | HC_vs_MS.NoTrt_B |
| DHFR     | 0.1959  | 0.30762 | 0.546 | 0.52 | 1 | HC_vs_MS.NoTrt_B |
| HYLS1    | 0.19628 | 0.90595 | 0.39  | 0.37 | 1 | HC_vs_MS.NoTrt_B |
| PSG5     | 0.19631 | 0.25163 | 0.317 | 0.28 | 1 | HC_vs_MS.NoTrt_B |
| ACADM    | 0.19636 | 0.25064 | 0.18  | 0.14 | 1 | HC_vs_MS.NoTrt_B |
| TIMD4    | 0.1964  | 0.37628 | 0.072 | 0.1  | 1 | HC_vs_MS.NoTrt_B |
| KLK2     | 0.19641 | 0.48971 | 0.341 | 0.31 | 1 | HC_vs_MS.NoTrt_B |
| DCP1B    | 0.19653 | -0.3463 | 0.133 | 0.17 | 1 | HC_vs_MS.NoTrt_B |

|           |         |         |       |      |   |                  |
|-----------|---------|---------|-------|------|---|------------------|
| CEP85     | 0.1969  | -0.3777 | 0.083 | 0.11 | 1 | HC_vs_MS.NoTrt_B |
| UBE2H     | 0.19714 | 0.73718 | 0.117 | 0.16 | 1 | HC_vs_MS.NoTrt_B |
| IPO8      | 0.19722 | 0.77134 | 0.523 | 0.5  | 1 | HC_vs_MS.NoTrt_B |
| ZNF248    | 0.19728 | 0.91071 | 0.149 | 0.11 | 1 | HC_vs_MS.NoTrt_B |
| PHF14     | 0.19783 | 1.34346 | 0.117 | 0.09 | 1 | HC_vs_MS.NoTrt_B |
| AKR1C1    | 0.19841 | 0.28872 | 0.229 | 0.28 | 1 | HC_vs_MS.NoTrt_B |
| MRPL14    | 0.19847 | 0.32903 | 0.077 | 0.11 | 1 | HC_vs_MS.NoTrt_B |
| NFKBIZ    | 0.19908 | 0.25456 | 0.336 | 0.41 | 1 | HC_vs_MS.NoTrt_B |
| PSMC1     | 0.19924 | -0.2532 | 0.42  | 0.44 | 1 | HC_vs_MS.NoTrt_B |
| HSD17B7   | 0.19957 | 0.35783 | 0.548 | 0.51 | 1 | HC_vs_MS.NoTrt_B |
| ZNF682    | 0.19978 | -0.2542 | 0.37  | 0.42 | 1 | HC_vs_MS.NoTrt_B |
| TMEM181   | 0.19985 | -0.3297 | 0.504 | 0.55 | 1 | HC_vs_MS.NoTrt_B |
| BAX       | 0.20005 | -0.2541 | 0.367 | 0.4  | 1 | HC_vs_MS.NoTrt_B |
| NAPB      | 0.20007 | 0.45823 | 0.403 | 0.36 | 1 | HC_vs_MS.NoTrt_B |
| ZNF17     | 0.20012 | 1.36183 | 0.277 | 0.24 | 1 | HC_vs_MS.NoTrt_B |
| GIPC1     | 0.20017 | 0.29536 | 0.474 | 0.43 | 1 | HC_vs_MS.NoTrt_B |
| KIAA0513  | 0.20098 | -0.7666 | 0.593 | 0.56 | 1 | HC_vs_MS.NoTrt_B |
| HERC2     | 0.20123 | 0.48912 | 0.851 | 0.85 | 1 | HC_vs_MS.NoTrt_B |
| ATF1      | 0.20127 | 0.47572 | 0.133 | 0.17 | 1 | HC_vs_MS.NoTrt_B |
| TMPRSS4   | 0.20137 | 0.28376 | 0.53  | 0.52 | 1 | HC_vs_MS.NoTrt_B |
| MECOM     | 0.2014  | 0.44588 | 0.378 | 0.36 | 1 | HC_vs_MS.NoTrt_B |
| RIC8B     | 0.2014  | 0.3175  | 0.123 | 0.09 | 1 | HC_vs_MS.NoTrt_B |
| TCP11L1   | 0.20143 | 0.71711 | 0.161 | 0.2  | 1 | HC_vs_MS.NoTrt_B |
| C20orf196 | 0.20151 | -0.542  | 0.355 | 0.41 | 1 | HC_vs_MS.NoTrt_B |
| WDR75     | 0.20163 | 0.83428 | 0.32  | 0.27 | 1 | HC_vs_MS.NoTrt_B |
| CAMKK1    | 0.20186 | 0.82137 | 0.148 | 0.2  | 1 | HC_vs_MS.NoTrt_B |
| NMI       | 0.20227 | -0.3282 | 0.274 | 0.31 | 1 | HC_vs_MS.NoTrt_B |
| ABHD11    | 0.20229 | 0.35845 | 0.629 | 0.62 | 1 | HC_vs_MS.NoTrt_B |
| ACAN      | 0.20274 | 0.45348 | 0.268 | 0.34 | 1 | HC_vs_MS.NoTrt_B |
| RREB1     | 0.20275 | 0.81985 | 0.729 | 0.74 | 1 | HC_vs_MS.NoTrt_B |
| NAA60     | 0.2028  | 0.25064 | 0.925 | 0.94 | 1 | HC_vs_MS.NoTrt_B |
| ZNF559    | 0.20292 | 0.27059 | 0.67  | 0.69 | 1 | HC_vs_MS.NoTrt_B |
| MECP2     | 0.2032  | 0.45899 | 0.907 | 0.92 | 1 | HC_vs_MS.NoTrt_B |
| PIWIL3    | 0.20333 | 0.42699 | 0.345 | 0.31 | 1 | HC_vs_MS.NoTrt_B |
| CYP2B6    | 0.20337 | 0.33802 | 0.607 | 0.62 | 1 | HC_vs_MS.NoTrt_B |
| FADS6     | 0.20355 | 0.2702  | 0.539 | 0.52 | 1 | HC_vs_MS.NoTrt_B |
| SVEP1     | 0.20377 | 0.34463 | 0.21  | 0.17 | 1 | HC_vs_MS.NoTrt_B |
| CD36      | 0.2038  | 0.38178 | 0.555 | 0.55 | 1 | HC_vs_MS.NoTrt_B |
| NAA15     | 0.20402 | 0.64187 | 0.739 | 0.74 | 1 | HC_vs_MS.NoTrt_B |
| SEMA3D    | 0.20428 | 0.33635 | 0.514 | 0.5  | 1 | HC_vs_MS.NoTrt_B |

|            |         |         |       |      |   |                  |
|------------|---------|---------|-------|------|---|------------------|
| UTP20      | 0.20444 | 0.59979 | 0.486 | 0.57 | 1 | HC_vs_MS.NoTrt_B |
| CLCN6      | 0.20447 | 0.92975 | 0.496 | 0.47 | 1 | HC_vs_MS.NoTrt_B |
| ZNF585A    | 0.20448 | 0.58276 | 0.364 | 0.31 | 1 | HC_vs_MS.NoTrt_B |
| STARD8     | 0.20465 | 0.39106 | 0.69  | 0.75 | 1 | HC_vs_MS.NoTrt_B |
| FBXO25     | 0.20481 | 0.27898 | 0.358 | 0.32 | 1 | HC_vs_MS.NoTrt_B |
| HIST1H1D   | 0.20483 | 1.37375 | 0.122 | 0.09 | 1 | HC_vs_MS.NoTrt_B |
| ULBP3      | 0.20544 | -0.483  | 0.491 | 0.59 | 1 | HC_vs_MS.NoTrt_B |
| RP11-458D2 | 0.20588 | 0.52411 | 0.106 | 0.08 | 1 | HC_vs_MS.NoTrt_B |
| ZNF28      | 0.20596 | 1.22298 | 0.777 | 0.77 | 1 | HC_vs_MS.NoTrt_B |
| UBFD1      | 0.20597 | 0.35089 | 0.367 | 0.33 | 1 | HC_vs_MS.NoTrt_B |
| NOTCH2NL   | 0.2063  | 0.69309 | 0.217 | 0.18 | 1 | HC_vs_MS.NoTrt_B |
| BPHL       | 0.20656 | 0.43216 | 0.612 | 0.6  | 1 | HC_vs_MS.NoTrt_B |
| ACSS3      | 0.20667 | 0.30354 | 0.267 | 0.23 | 1 | HC_vs_MS.NoTrt_B |
| TUBGCP6    | 0.20745 | 0.31273 | 0.583 | 0.63 | 1 | HC_vs_MS.NoTrt_B |
| MOB3B      | 0.20759 | 0.26778 | 0.577 | 0.56 | 1 | HC_vs_MS.NoTrt_B |
| ZFYVE21    | 0.20778 | 0.6222  | 0.655 | 0.66 | 1 | HC_vs_MS.NoTrt_B |
| AGK        | 0.20788 | 0.34964 | 0.18  | 0.23 | 1 | HC_vs_MS.NoTrt_B |
| EPHX2      | 0.20795 | 0.56655 | 0.294 | 0.25 | 1 | HC_vs_MS.NoTrt_B |
| RENBP      | 0.20857 | 0.43219 | 0.82  | 0.84 | 1 | HC_vs_MS.NoTrt_B |
| SLC5A6     | 0.20873 | -0.3873 | 0.075 | 0.1  | 1 | HC_vs_MS.NoTrt_B |
| MKRN2OS    | 0.2088  | 0.5916  | 0.187 | 0.16 | 1 | HC_vs_MS.NoTrt_B |
| IFNGR2     | 0.20881 | 0.48751 | 0.31  | 0.38 | 1 | HC_vs_MS.NoTrt_B |
| MRPS28     | 0.20893 | 0.31539 | 0.596 | 0.59 | 1 | HC_vs_MS.NoTrt_B |
| MYH10      | 0.20901 | 0.27026 | 0.083 | 0.11 | 1 | HC_vs_MS.NoTrt_B |
| EFCAB14    | 0.20938 | 0.49877 | 0.28  | 0.24 | 1 | HC_vs_MS.NoTrt_B |
| LAMB4      | 0.20993 | 0.4245  | 0.422 | 0.42 | 1 | HC_vs_MS.NoTrt_B |
| ZNF197     | 0.2104  | 0.58474 | 0.467 | 0.44 | 1 | HC_vs_MS.NoTrt_B |
| DNAJC19    | 0.2107  | 0.42959 | 0.228 | 0.28 | 1 | HC_vs_MS.NoTrt_B |
| MYOZ3      | 0.21077 | 0.40652 | 0.243 | 0.3  | 1 | HC_vs_MS.NoTrt_B |
| LUC7L      | 0.21082 | 0.25194 | 0.839 | 0.86 | 1 | HC_vs_MS.NoTrt_B |
| ZNF12      | 0.21132 | 0.51446 | 0.329 | 0.28 | 1 | HC_vs_MS.NoTrt_B |
| TCERG1     | 0.21156 | 0.63503 | 0.309 | 0.28 | 1 | HC_vs_MS.NoTrt_B |
| TFAM       | 0.21166 | 0.44413 | 0.312 | 0.27 | 1 | HC_vs_MS.NoTrt_B |
| ELK4       | 0.2119  | 0.72345 | 0.542 | 0.52 | 1 | HC_vs_MS.NoTrt_B |
| FAM178B    | 0.21206 | 0.32082 | 0.613 | 0.6  | 1 | HC_vs_MS.NoTrt_B |
| TFDP2      | 0.21209 | 0.31578 | 0.903 | 0.91 | 1 | HC_vs_MS.NoTrt_B |
| ATF7       | 0.21254 | 0.34168 | 0.42  | 0.5  | 1 | HC_vs_MS.NoTrt_B |
| DYDC1      | 0.21256 | 0.26842 | 0.584 | 0.58 | 1 | HC_vs_MS.NoTrt_B |
| OR11A1     | 0.21285 | 0.37126 | 0.267 | 0.24 | 1 | HC_vs_MS.NoTrt_B |
| PTPRM      | 0.21289 | 1.1977  | 0.203 | 0.17 | 1 | HC_vs_MS.NoTrt_B |

|            |         |         |       |      |   |                  |
|------------|---------|---------|-------|------|---|------------------|
| NABP1      | 0.21289 | 0.28645 | 0.757 | 0.82 | 1 | HC_vs_MS.NoTrt_B |
| CYP4V2     | 0.21308 | 0.79036 | 0.707 | 0.69 | 1 | HC_vs_MS.NoTrt_B |
| ABHD2      | 0.21312 | -0.3495 | 0.622 | 0.71 | 1 | HC_vs_MS.NoTrt_B |
| ZNF131     | 0.21367 | -0.3224 | 0.812 | 0.84 | 1 | HC_vs_MS.NoTrt_B |
| ARPC4-TTL1 | 0.21381 | -0.3149 | 0.084 | 0.11 | 1 | HC_vs_MS.NoTrt_B |
| JMJD1C     | 0.21417 | 0.47793 | 0.22  | 0.28 | 1 | HC_vs_MS.NoTrt_B |
| ZNF678     | 0.21433 | 0.42838 | 0.172 | 0.14 | 1 | HC_vs_MS.NoTrt_B |
| PLGLB1     | 0.21491 | 0.39108 | 0.119 | 0.16 | 1 | HC_vs_MS.NoTrt_B |
| ERLIN2     | 0.21501 | 0.51365 | 0.358 | 0.32 | 1 | HC_vs_MS.NoTrt_B |
| NUFIP2     | 0.21522 | 0.54797 | 0.471 | 0.46 | 1 | HC_vs_MS.NoTrt_B |
| COTL1      | 0.21554 | -0.3122 | 0.88  | 0.91 | 1 | HC_vs_MS.NoTrt_B |
| SORT1      | 0.21571 | 0.58768 | 0.528 | 0.52 | 1 | HC_vs_MS.NoTrt_B |
| TRAM2      | 0.21579 | -0.3668 | 0.248 | 0.29 | 1 | HC_vs_MS.NoTrt_B |
| MGST2      | 0.2158  | -0.2589 | 0.157 | 0.2  | 1 | HC_vs_MS.NoTrt_B |
| LYZ        | 0.21581 | 0.81195 | 0.406 | 0.38 | 1 | HC_vs_MS.NoTrt_B |
| PINLYP     | 0.21593 | 0.29278 | 0.597 | 0.61 | 1 | HC_vs_MS.NoTrt_B |
| RCL1       | 0.21599 | 1.30934 | 0.5   | 0.5  | 1 | HC_vs_MS.NoTrt_B |
| IKBKAP     | 0.21678 | 0.71749 | 0.216 | 0.18 | 1 | HC_vs_MS.NoTrt_B |
| SRPRA      | 0.21691 | 0.33413 | 0.238 | 0.29 | 1 | HC_vs_MS.NoTrt_B |
| FANK1      | 0.21715 | -0.4481 | 0.158 | 0.19 | 1 | HC_vs_MS.NoTrt_B |
| TOPBP1     | 0.2178  | 0.57527 | 0.106 | 0.14 | 1 | HC_vs_MS.NoTrt_B |
| ZNF286B    | 0.21806 | 1.00028 | 0.481 | 0.48 | 1 | HC_vs_MS.NoTrt_B |
| PRKAB1     | 0.21818 | 0.28433 | 0.784 | 0.76 | 1 | HC_vs_MS.NoTrt_B |
| THEMIS     | 0.21819 | 1.06151 | 0.194 | 0.16 | 1 | HC_vs_MS.NoTrt_B |
| MAP1LC3C   | 0.21867 | 0.4297  | 0.374 | 0.36 | 1 | HC_vs_MS.NoTrt_B |
| NDUFB5     | 0.21891 | -0.3474 | 0.68  | 0.74 | 1 | HC_vs_MS.NoTrt_B |
| FAN1       | 0.21911 | 0.76449 | 0.288 | 0.34 | 1 | HC_vs_MS.NoTrt_B |
| TMEM168    | 0.21944 | 0.62944 | 0.51  | 0.48 | 1 | HC_vs_MS.NoTrt_B |
| DLGAP4     | 0.21955 | 0.26639 | 0.149 | 0.19 | 1 | HC_vs_MS.NoTrt_B |
| ZNF302     | 0.21957 | 0.30696 | 0.426 | 0.35 | 1 | HC_vs_MS.NoTrt_B |
| NOTCH2     | 0.21968 | 0.88112 | 0.204 | 0.17 | 1 | HC_vs_MS.NoTrt_B |
| MAP2K3     | 0.21991 | -0.3741 | 0.116 | 0.15 | 1 | HC_vs_MS.NoTrt_B |
| ADRB2      | 0.22054 | 1.51838 | 0.187 | 0.16 | 1 | HC_vs_MS.NoTrt_B |
| UBN2       | 0.22079 | 0.7307  | 0.606 | 0.6  | 1 | HC_vs_MS.NoTrt_B |
| SEMA4B     | 0.22115 | 0.37922 | 0.397 | 0.36 | 1 | HC_vs_MS.NoTrt_B |
| PIGA       | 0.22157 | -0.2672 | 0.39  | 0.43 | 1 | HC_vs_MS.NoTrt_B |
| MFHAS1     | 0.22179 | -0.2681 | 0.075 | 0.1  | 1 | HC_vs_MS.NoTrt_B |
| GLYR1      | 0.22195 | -0.267  | 0.391 | 0.43 | 1 | HC_vs_MS.NoTrt_B |
| NOS3       | 0.22214 | 0.50074 | 0.362 | 0.44 | 1 | HC_vs_MS.NoTrt_B |
| SLC12A2    | 0.22217 | 0.60533 | 0.526 | 0.63 | 1 | HC_vs_MS.NoTrt_B |



|            |         |         |       |      |   |                  |
|------------|---------|---------|-------|------|---|------------------|
| HOMER3     | 0.22234 | -0.2588 | 0.32  | 0.28 | 1 | HC_vs_MS.NoTrt_B |
| FAM46C     | 0.22285 | 1.01279 | 0.158 | 0.12 | 1 | HC_vs_MS.NoTrt_B |
| VSTM1      | 0.2233  | 0.27166 | 0.296 | 0.25 | 1 | HC_vs_MS.NoTrt_B |
| TUBGCP2    | 0.22333 | -0.2783 | 0.761 | 0.78 | 1 | HC_vs_MS.NoTrt_B |
| RP11-295P9 | 0.22339 | -0.4955 | 0.08  | 0.11 | 1 | HC_vs_MS.NoTrt_B |
| PHPT1      | 0.22361 | -0.2729 | 0.106 | 0.14 | 1 | HC_vs_MS.NoTrt_B |
| RAB1A      | 0.22402 | 0.64276 | 0.135 | 0.17 | 1 | HC_vs_MS.NoTrt_B |
| PCBD2      | 0.22469 | 0.53632 | 0.799 | 0.83 | 1 | HC_vs_MS.NoTrt_B |
| RP11-644F5 | 0.2252  | 0.46687 | 0.625 | 0.64 | 1 | HC_vs_MS.NoTrt_B |
| ZFX        | 0.22561 | 0.25996 | 0.651 | 0.6  | 1 | HC_vs_MS.NoTrt_B |
| MFN1       | 0.22569 | 0.3911  | 0.439 | 0.38 | 1 | HC_vs_MS.NoTrt_B |
| LZTS1      | 0.22575 | 0.28017 | 0.325 | 0.4  | 1 | HC_vs_MS.NoTrt_B |
| GCLM       | 0.22579 | 0.54619 | 0.672 | 0.68 | 1 | HC_vs_MS.NoTrt_B |
| EFL1       | 0.2259  | -0.3897 | 0.091 | 0.12 | 1 | HC_vs_MS.NoTrt_B |
| HAP1       | 0.22649 | 0.37888 | 0.746 | 0.76 | 1 | HC_vs_MS.NoTrt_B |
| SAAL1      | 0.22658 | 0.62561 | 0.074 | 0.1  | 1 | HC_vs_MS.NoTrt_B |
| CALCRL     | 0.22697 | 0.31483 | 0.646 | 0.68 | 1 | HC_vs_MS.NoTrt_B |
| KRT10      | 0.2273  | 0.41816 | 0.081 | 0.11 | 1 | HC_vs_MS.NoTrt_B |
| ZNF160     | 0.22733 | 0.47107 | 0.593 | 0.56 | 1 | HC_vs_MS.NoTrt_B |
| PNPLA8     | 0.22783 | 0.46909 | 0.333 | 0.4  | 1 | HC_vs_MS.NoTrt_B |
| PTK6       | 0.22791 | 0.54117 | 0.332 | 0.4  | 1 | HC_vs_MS.NoTrt_B |
| RFX3       | 0.22795 | 1.03389 | 0.194 | 0.16 | 1 | HC_vs_MS.NoTrt_B |
| CTDSPL     | 0.22797 | 0.36808 | 0.235 | 0.2  | 1 | HC_vs_MS.NoTrt_B |
| SOCS4      | 0.22802 | 0.3248  | 0.246 | 0.3  | 1 | HC_vs_MS.NoTrt_B |
| HNRNPU     | 0.22855 | 0.3051  | 0.48  | 0.56 | 1 | HC_vs_MS.NoTrt_B |
| BRAT1      | 0.2286  | 0.32953 | 0.317 | 0.27 | 1 | HC_vs_MS.NoTrt_B |
| FXN        | 0.2286  | 0.34705 | 0.157 | 0.2  | 1 | HC_vs_MS.NoTrt_B |
| NCR1       | 0.22868 | 0.72159 | 0.223 | 0.18 | 1 | HC_vs_MS.NoTrt_B |
| PPP4R2     | 0.22876 | 0.48708 | 0.457 | 0.44 | 1 | HC_vs_MS.NoTrt_B |
| APBB2      | 0.22889 | 0.44265 | 0.317 | 0.29 | 1 | HC_vs_MS.NoTrt_B |
| SGPP2      | 0.22904 | 0.31782 | 0.332 | 0.28 | 1 | HC_vs_MS.NoTrt_B |
| EPB41L2    | 0.2295  | -0.4465 | 0.112 | 0.15 | 1 | HC_vs_MS.NoTrt_B |
| UST        | 0.22961 | -0.3521 | 0.272 | 0.31 | 1 | HC_vs_MS.NoTrt_B |
| MTF1       | 0.22999 | 0.58297 | 0.267 | 0.23 | 1 | HC_vs_MS.NoTrt_B |
| EIF4E2     | 0.2301  | -0.3256 | 0.322 | 0.37 | 1 | HC_vs_MS.NoTrt_B |
| ZNF257     | 0.23034 | 0.572   | 0.536 | 0.5  | 1 | HC_vs_MS.NoTrt_B |
| BMP8A      | 0.23065 | -0.3225 | 0.565 | 0.62 | 1 | HC_vs_MS.NoTrt_B |
| ZNF700     | 0.2307  | 0.8493  | 0.148 | 0.2  | 1 | HC_vs_MS.NoTrt_B |
| ST3GAL5    | 0.23086 | -0.532  | 0.284 | 0.33 | 1 | HC_vs_MS.NoTrt_B |
| HARS       | 0.23087 | -0.2977 | 0.823 | 0.88 | 1 | HC_vs_MS.NoTrt_B |

|          |         |         |       |      |   |                  |
|----------|---------|---------|-------|------|---|------------------|
| TTC9C    | 0.23117 | -0.3161 | 0.357 | 0.3  | 1 | HC_vs_MS.NoTrt_B |
| BTG3     | 0.23143 | -0.2853 | 0.232 | 0.27 | 1 | HC_vs_MS.NoTrt_B |
| LAMA4    | 0.23166 | 0.3428  | 0.229 | 0.2  | 1 | HC_vs_MS.NoTrt_B |
| JMY      | 0.23172 | 0.3159  | 0.259 | 0.22 | 1 | HC_vs_MS.NoTrt_B |
| SULT2A1  | 0.23204 | 0.30159 | 0.7   | 0.72 | 1 | HC_vs_MS.NoTrt_B |
| RTTN     | 0.23292 | 0.30529 | 0.239 | 0.22 | 1 | HC_vs_MS.NoTrt_B |
| C6orf25  | 0.23345 | 0.7871  | 0.436 | 0.42 | 1 | HC_vs_MS.NoTrt_B |
| PSD3     | 0.23348 | 0.8521  | 0.31  | 0.27 | 1 | HC_vs_MS.NoTrt_B |
| FAM35A   | 0.23365 | 0.26294 | 0.103 | 0.14 | 1 | HC_vs_MS.NoTrt_B |
| POLR3A   | 0.2338  | 0.33135 | 0.829 | 0.84 | 1 | HC_vs_MS.NoTrt_B |
| RASGRP4  | 0.23387 | -0.5839 | 0.472 | 0.5  | 1 | HC_vs_MS.NoTrt_B |
| PBX2     | 0.23396 | 1.17527 | 0.12  | 0.09 | 1 | HC_vs_MS.NoTrt_B |
| MRPL40   | 0.23417 | -0.3348 | 0.394 | 0.45 | 1 | HC_vs_MS.NoTrt_B |
| MITF     | 0.2345  | 0.4327  | 0.139 | 0.18 | 1 | HC_vs_MS.NoTrt_B |
| FLT4     | 0.2346  | 0.33643 | 0.104 | 0.14 | 1 | HC_vs_MS.NoTrt_B |
| IFI44L   | 0.23469 | 0.83009 | 0.2   | 0.16 | 1 | HC_vs_MS.NoTrt_B |
| SCN2B    | 0.23481 | -0.6572 | 0.312 | 0.27 | 1 | HC_vs_MS.NoTrt_B |
| TTC14    | 0.23507 | 0.43746 | 0.399 | 0.46 | 1 | HC_vs_MS.NoTrt_B |
| SETX     | 0.23534 | 0.40732 | 0.283 | 0.35 | 1 | HC_vs_MS.NoTrt_B |
| NREP     | 0.23543 | 0.67901 | 0.191 | 0.16 | 1 | HC_vs_MS.NoTrt_B |
| GEN1     | 0.23578 | 0.27099 | 0.741 | 0.77 | 1 | HC_vs_MS.NoTrt_B |
| APOOL    | 0.23625 | 0.3879  | 0.771 | 0.78 | 1 | HC_vs_MS.NoTrt_B |
| MIOS     | 0.23639 | 0.54082 | 0.271 | 0.32 | 1 | HC_vs_MS.NoTrt_B |
| FAM222B  | 0.23656 | 0.29042 | 0.136 | 0.17 | 1 | HC_vs_MS.NoTrt_B |
| FSD1L    | 0.23657 | 0.32772 | 0.229 | 0.2  | 1 | HC_vs_MS.NoTrt_B |
| FOXK2    | 0.23675 | -0.2934 | 0.252 | 0.29 | 1 | HC_vs_MS.NoTrt_B |
| OVCA2    | 0.23678 | 0.32932 | 0.091 | 0.12 | 1 | HC_vs_MS.NoTrt_B |
| TRAPPC6A | 0.23738 | -0.2506 | 0.178 | 0.22 | 1 | HC_vs_MS.NoTrt_B |
| ZCCHC11  | 0.23747 | 0.37095 | 0.93  | 0.9  | 1 | HC_vs_MS.NoTrt_B |
| BCAP29   | 0.23797 | 0.32559 | 0.374 | 0.34 | 1 | HC_vs_MS.NoTrt_B |
| FAM107B  | 0.2385  | 0.47054 | 0.348 | 0.32 | 1 | HC_vs_MS.NoTrt_B |
| PPARG    | 0.23865 | 0.28581 | 0.377 | 0.35 | 1 | HC_vs_MS.NoTrt_B |
| SORBS1   | 0.23885 | 0.44021 | 0.219 | 0.18 | 1 | HC_vs_MS.NoTrt_B |
| LETM2    | 0.23907 | 0.2626  | 0.667 | 0.67 | 1 | HC_vs_MS.NoTrt_B |
| ATOX1    | 0.23918 | 0.69308 | 0.174 | 0.14 | 1 | HC_vs_MS.NoTrt_B |
| PALLD    | 0.23948 | -0.3246 | 0.338 | 0.3  | 1 | HC_vs_MS.NoTrt_B |
| SCMH1    | 0.23962 | 0.41168 | 0.104 | 0.14 | 1 | HC_vs_MS.NoTrt_B |
| MTPN     | 0.23964 | 0.28474 | 0.162 | 0.21 | 1 | HC_vs_MS.NoTrt_B |
| F5       | 0.23967 | 0.69634 | 0.272 | 0.24 | 1 | HC_vs_MS.NoTrt_B |
| ZC3H11A  | 0.2402  | 0.4749  | 0.204 | 0.17 | 1 | HC_vs_MS.NoTrt_B |

|            |         |         |       |      |   |                  |
|------------|---------|---------|-------|------|---|------------------|
| ZMYM3      | 0.241   | 0.54198 | 0.419 | 0.4  | 1 | HC_vs_MS.NoTrt_B |
| ELF4       | 0.24101 | 0.29897 | 0.112 | 0.15 | 1 | HC_vs_MS.NoTrt_B |
| SBNO1      | 0.24139 | 0.33023 | 0.645 | 0.6  | 1 | HC_vs_MS.NoTrt_B |
| ANKRD49    | 0.24143 | 0.7782  | 0.157 | 0.2  | 1 | HC_vs_MS.NoTrt_B |
| EDEM1      | 0.2419  | 0.33039 | 0.314 | 0.37 | 1 | HC_vs_MS.NoTrt_B |
| KLHL6      | 0.24193 | 0.47187 | 0.729 | 0.73 | 1 | HC_vs_MS.NoTrt_B |
| DISC1      | 0.24219 | 1.15268 | 0.486 | 0.44 | 1 | HC_vs_MS.NoTrt_B |
| WAC        | 0.24268 | 0.35998 | 0.445 | 0.51 | 1 | HC_vs_MS.NoTrt_B |
| WIPF2      | 0.24278 | 0.56526 | 0.772 | 0.82 | 1 | HC_vs_MS.NoTrt_B |
| CYP7B1     | 0.24285 | 0.47445 | 0.428 | 0.42 | 1 | HC_vs_MS.NoTrt_B |
| CDC14B     | 0.24296 | 0.44214 | 0.322 | 0.29 | 1 | HC_vs_MS.NoTrt_B |
| GABRG3     | 0.24311 | 0.25758 | 0.348 | 0.31 | 1 | HC_vs_MS.NoTrt_B |
| DMKN       | 0.24328 | 0.27028 | 0.471 | 0.43 | 1 | HC_vs_MS.NoTrt_B |
| HSD17B2    | 0.24354 | 0.25247 | 0.749 | 0.77 | 1 | HC_vs_MS.NoTrt_B |
| PELI1      | 0.24355 | 0.54771 | 0.172 | 0.22 | 1 | HC_vs_MS.NoTrt_B |
| WNT10A     | 0.2438  | 0.72518 | 0.126 | 0.16 | 1 | HC_vs_MS.NoTrt_B |
| CA12       | 0.24381 | 0.6508  | 0.265 | 0.22 | 1 | HC_vs_MS.NoTrt_B |
| WDR60      | 0.24383 | 0.7474  | 0.133 | 0.1  | 1 | HC_vs_MS.NoTrt_B |
| SMAD4      | 0.24425 | 0.38092 | 0.491 | 0.44 | 1 | HC_vs_MS.NoTrt_B |
| EARS2      | 0.24443 | 0.29079 | 0.604 | 0.65 | 1 | HC_vs_MS.NoTrt_B |
| HKR1       | 0.24448 | 0.26229 | 0.967 | 0.98 | 1 | HC_vs_MS.NoTrt_B |
| THSD4      | 0.24481 | 0.49948 | 0.362 | 0.32 | 1 | HC_vs_MS.NoTrt_B |
| TADA2B     | 0.24514 | 1.73335 | 0.317 | 0.3  | 1 | HC_vs_MS.NoTrt_B |
| HSBP1L1    | 0.24535 | -0.2561 | 0.365 | 0.41 | 1 | HC_vs_MS.NoTrt_B |
| SMURF2     | 0.24541 | 0.49212 | 0.794 | 0.77 | 1 | HC_vs_MS.NoTrt_B |
| ZFPM2      | 0.24576 | 0.43493 | 0.417 | 0.4  | 1 | HC_vs_MS.NoTrt_B |
| FOXJ2      | 0.24592 | 0.50996 | 0.449 | 0.51 | 1 | HC_vs_MS.NoTrt_B |
| TMEM40     | 0.24604 | 0.26829 | 0.772 | 0.79 | 1 | HC_vs_MS.NoTrt_B |
| MYB        | 0.2469  | 0.55689 | 0.28  | 0.33 | 1 | HC_vs_MS.NoTrt_B |
| BBS4       | 0.2473  | -0.3594 | 0.077 | 0.1  | 1 | HC_vs_MS.NoTrt_B |
| CACNA1G    | 0.24754 | 0.25174 | 0.184 | 0.16 | 1 | HC_vs_MS.NoTrt_B |
| ABCD4      | 0.24825 | 0.26683 | 0.79  | 0.79 | 1 | HC_vs_MS.NoTrt_B |
| PLEKHG3    | 0.24838 | -0.6858 | 0.396 | 0.47 | 1 | HC_vs_MS.NoTrt_B |
| SPDYE3     | 0.24881 | 0.52955 | 0.588 | 0.55 | 1 | HC_vs_MS.NoTrt_B |
| TAOK2      | 0.24892 | 0.73822 | 0.103 | 0.08 | 1 | HC_vs_MS.NoTrt_B |
| BID        | 0.24894 | -0.4515 | 0.478 | 0.51 | 1 | HC_vs_MS.NoTrt_B |
| FBXL17     | 0.24914 | 0.54128 | 0.243 | 0.21 | 1 | HC_vs_MS.NoTrt_B |
| ZNF587B    | 0.24922 | 0.42022 | 0.336 | 0.3  | 1 | HC_vs_MS.NoTrt_B |
| BBS9       | 0.24923 | -0.3597 | 0.096 | 0.12 | 1 | HC_vs_MS.NoTrt_B |
| AC240274.1 | 0.24935 | 1.10199 | 0.241 | 0.21 | 1 | HC_vs_MS.NoTrt_B |

|          |         |         |       |      |   |                  |
|----------|---------|---------|-------|------|---|------------------|
| VRK2     | 0.24969 | -0.3362 | 0.212 | 0.25 | 1 | HC_vs_MS.NoTrt_B |
| NATD1    | 0.24975 | 0.75876 | 0.481 | 0.46 | 1 | HC_vs_MS.NoTrt_B |
| AFTPH    | 0.25026 | 0.41605 | 0.162 | 0.21 | 1 | HC_vs_MS.NoTrt_B |
| DPP3     | 0.25048 | 0.39616 | 0.187 | 0.15 | 1 | HC_vs_MS.NoTrt_B |
| GPR107   | 0.25094 | 0.74361 | 0.145 | 0.11 | 1 | HC_vs_MS.NoTrt_B |
| KIF5B    | 0.25113 | 0.43871 | 0.262 | 0.34 | 1 | HC_vs_MS.NoTrt_B |
| GDE1     | 0.25113 | -1.1311 | 0.245 | 0.29 | 1 | HC_vs_MS.NoTrt_B |
| TRPV1    | 0.25125 | -0.2652 | 0.401 | 0.39 | 1 | HC_vs_MS.NoTrt_B |
| CRLF2    | 0.25126 | 0.31376 | 0.3   | 0.28 | 1 | HC_vs_MS.NoTrt_B |
| SYCP1    | 0.25163 | 0.30172 | 0.312 | 0.29 | 1 | HC_vs_MS.NoTrt_B |
| PLA2G12A | 0.25169 | -0.2558 | 0.57  | 0.65 | 1 | HC_vs_MS.NoTrt_B |
| PRKRIP1  | 0.25175 | 1.64814 | 0.13  | 0.1  | 1 | HC_vs_MS.NoTrt_B |
| ADAT2    | 0.25184 | 0.5942  | 0.404 | 0.38 | 1 | HC_vs_MS.NoTrt_B |
| CERKL    | 0.25218 | 0.27024 | 0.354 | 0.43 | 1 | HC_vs_MS.NoTrt_B |
| CCDC13   | 0.25244 | 0.76892 | 0.32  | 0.3  | 1 | HC_vs_MS.NoTrt_B |
| VSX1     | 0.25262 | 0.26493 | 0.17  | 0.21 | 1 | HC_vs_MS.NoTrt_B |
| FUCA2    | 0.25337 | 0.36323 | 0.296 | 0.27 | 1 | HC_vs_MS.NoTrt_B |
| DPH5     | 0.25339 | -0.4792 | 0.343 | 0.38 | 1 | HC_vs_MS.NoTrt_B |
| CCDC130  | 0.25359 | 0.28894 | 0.429 | 0.49 | 1 | HC_vs_MS.NoTrt_B |
| USP13    | 0.25385 | 0.79554 | 0.259 | 0.23 | 1 | HC_vs_MS.NoTrt_B |
| KIF1B    | 0.25394 | 0.47498 | 0.788 | 0.81 | 1 | HC_vs_MS.NoTrt_B |
| BLOC1S4  | 0.25407 | 0.46283 | 0.149 | 0.18 | 1 | HC_vs_MS.NoTrt_B |
| RFC4     | 0.25412 | -0.5512 | 0.228 | 0.27 | 1 | HC_vs_MS.NoTrt_B |
| UACA     | 0.25452 | 0.35716 | 0.404 | 0.38 | 1 | HC_vs_MS.NoTrt_B |
| GFI1B    | 0.25461 | 0.41866 | 0.541 | 0.54 | 1 | HC_vs_MS.NoTrt_B |
| ABCA5    | 0.25501 | 0.37475 | 0.6   | 0.68 | 1 | HC_vs_MS.NoTrt_B |
| P3H4     | 0.25533 | 0.36294 | 0.896 | 0.9  | 1 | HC_vs_MS.NoTrt_B |
| SCUBE2   | 0.25718 | 0.25153 | 0.304 | 0.28 | 1 | HC_vs_MS.NoTrt_B |
| CEP295   | 0.25792 | 0.95381 | 0.565 | 0.56 | 1 | HC_vs_MS.NoTrt_B |
| NPAP1    | 0.25802 | 0.38139 | 0.465 | 0.46 | 1 | HC_vs_MS.NoTrt_B |
| FSTL4    | 0.25891 | 0.5457  | 0.155 | 0.13 | 1 | HC_vs_MS.NoTrt_B |
| RANGAP1  | 0.25904 | -0.442  | 0.659 | 0.71 | 1 | HC_vs_MS.NoTrt_B |
| ZNF514   | 0.25905 | 0.38413 | 0.597 | 0.72 | 1 | HC_vs_MS.NoTrt_B |
| GNLY     | 0.25909 | 1.27653 | 0.226 | 0.2  | 1 | HC_vs_MS.NoTrt_B |
| C14orf80 | 0.25926 | -1.0775 | 0.262 | 0.32 | 1 | HC_vs_MS.NoTrt_B |
| ATRIP    | 0.25941 | -0.3963 | 0.078 | 0.1  | 1 | HC_vs_MS.NoTrt_B |
| ZNF346   | 0.25969 | -0.2697 | 0.743 | 0.77 | 1 | HC_vs_MS.NoTrt_B |
| TNFRSF9  | 0.25978 | -0.4545 | 0.899 | 0.91 | 1 | HC_vs_MS.NoTrt_B |
| JARID2   | 0.25981 | 0.26499 | 0.18  | 0.22 | 1 | HC_vs_MS.NoTrt_B |
| DLG1     | 0.25983 | 0.62155 | 0.581 | 0.56 | 1 | HC_vs_MS.NoTrt_B |

|            |         |         |       |      |   |                  |
|------------|---------|---------|-------|------|---|------------------|
| SVIL       | 0.26048 | 0.53411 | 0.148 | 0.12 | 1 | HC_vs_MS.NoTrt_B |
| OXNAD1     | 0.26058 | 0.6846  | 0.31  | 0.28 | 1 | HC_vs_MS.NoTrt_B |
| PSEN2      | 0.26122 | -1.3555 | 0.138 | 0.17 | 1 | HC_vs_MS.NoTrt_B |
| NCAPH      | 0.26153 | -0.4839 | 0.455 | 0.42 | 1 | HC_vs_MS.NoTrt_B |
| ALG3       | 0.26161 | 0.48571 | 0.12  | 0.09 | 1 | HC_vs_MS.NoTrt_B |
| CCDC85C    | 0.26195 | 0.84942 | 0.407 | 0.37 | 1 | HC_vs_MS.NoTrt_B |
| SRFBP1     | 0.26216 | 0.66209 | 0.429 | 0.4  | 1 | HC_vs_MS.NoTrt_B |
| MME        | 0.26227 | 0.45039 | 0.439 | 0.41 | 1 | HC_vs_MS.NoTrt_B |
| SLC33A1    | 0.2624  | -0.4354 | 0.893 | 0.89 | 1 | HC_vs_MS.NoTrt_B |
| GPM6A      | 0.2626  | 0.26235 | 0.28  | 0.24 | 1 | HC_vs_MS.NoTrt_B |
| ARHGAP35   | 0.26278 | -0.5228 | 0.161 | 0.19 | 1 | HC_vs_MS.NoTrt_B |
| GSDMD      | 0.26299 | -0.375  | 0.794 | 0.82 | 1 | HC_vs_MS.NoTrt_B |
| RGMA       | 0.26302 | 0.35164 | 0.652 | 0.64 | 1 | HC_vs_MS.NoTrt_B |
| RP11-111H1 | 0.26328 | 0.30183 | 0.113 | 0.15 | 1 | HC_vs_MS.NoTrt_B |
| METTL5     | 0.26359 | -0.3984 | 0.464 | 0.48 | 1 | HC_vs_MS.NoTrt_B |
| ACSM2B     | 0.2639  | 0.32701 | 0.522 | 0.53 | 1 | HC_vs_MS.NoTrt_B |
| SULT1C4    | 0.26408 | 0.35271 | 0.554 | 0.57 | 1 | HC_vs_MS.NoTrt_B |
| KLHL35     | 0.26443 | -0.2895 | 0.364 | 0.42 | 1 | HC_vs_MS.NoTrt_B |
| SCNN1A     | 0.2645  | 0.30874 | 0.729 | 0.78 | 1 | HC_vs_MS.NoTrt_B |
| CCND2      | 0.26464 | 0.33504 | 0.381 | 0.44 | 1 | HC_vs_MS.NoTrt_B |
| JAM2       | 0.26477 | 0.28784 | 0.5   | 0.51 | 1 | HC_vs_MS.NoTrt_B |
| PTGES      | 0.26487 | 0.31685 | 0.481 | 0.48 | 1 | HC_vs_MS.NoTrt_B |
| SHQ1       | 0.26525 | 0.67022 | 0.69  | 0.67 | 1 | HC_vs_MS.NoTrt_B |
| ATG2B      | 0.26578 | 0.67929 | 0.296 | 0.36 | 1 | HC_vs_MS.NoTrt_B |
| ZNF780B    | 0.26581 | 0.87412 | 0.588 | 0.6  | 1 | HC_vs_MS.NoTrt_B |
| PALB2      | 0.26616 | -0.3248 | 0.186 | 0.22 | 1 | HC_vs_MS.NoTrt_B |
| UBXN7      | 0.26645 | 0.68921 | 0.787 | 0.78 | 1 | HC_vs_MS.NoTrt_B |
| ZNF573     | 0.26647 | 0.28243 | 0.368 | 0.42 | 1 | HC_vs_MS.NoTrt_B |
| DGKE       | 0.26665 | 0.2841  | 0.661 | 0.74 | 1 | HC_vs_MS.NoTrt_B |
| C1orf27    | 0.26667 | 0.45056 | 0.155 | 0.19 | 1 | HC_vs_MS.NoTrt_B |
| CHD9       | 0.26674 | 0.30717 | 0.345 | 0.4  | 1 | HC_vs_MS.NoTrt_B |
| ZFP30      | 0.26684 | 0.3477  | 0.828 | 0.81 | 1 | HC_vs_MS.NoTrt_B |
| ORAI3      | 0.26705 | -0.5096 | 0.093 | 0.12 | 1 | HC_vs_MS.NoTrt_B |
| PCSK6      | 0.26705 | 0.34542 | 0.633 | 0.63 | 1 | HC_vs_MS.NoTrt_B |
| PREPL      | 0.26715 | 0.53751 | 0.683 | 0.67 | 1 | HC_vs_MS.NoTrt_B |
| ELMO1      | 0.26718 | 0.35771 | 0.754 | 0.75 | 1 | HC_vs_MS.NoTrt_B |
| PNPT1      | 0.26721 | 0.43406 | 0.855 | 0.88 | 1 | HC_vs_MS.NoTrt_B |
| PTPRK      | 0.2675  | 0.34293 | 0.443 | 0.43 | 1 | HC_vs_MS.NoTrt_B |
| DNAJC15    | 0.26777 | -0.3661 | 0.175 | 0.21 | 1 | HC_vs_MS.NoTrt_B |
| TPGS1      | 0.26833 | 0.77004 | 0.254 | 0.22 | 1 | HC_vs_MS.NoTrt_B |

|           |         |         |       |      |   |                  |
|-----------|---------|---------|-------|------|---|------------------|
| THRAP3    | 0.2684  | 0.30435 | 0.349 | 0.42 | 1 | HC_vs_MS.NoTrt_B |
| ZNF226    | 0.26858 | -0.4618 | 0.523 | 0.47 | 1 | HC_vs_MS.NoTrt_B |
| DHTKD1    | 0.26867 | 0.45139 | 0.806 | 0.83 | 1 | HC_vs_MS.NoTrt_B |
| EBPL      | 0.26878 | 0.37858 | 0.706 | 0.73 | 1 | HC_vs_MS.NoTrt_B |
| ELOF1     | 0.26905 | -0.4669 | 0.581 | 0.62 | 1 | HC_vs_MS.NoTrt_B |
| MED14     | 0.26966 | 1.34503 | 0.141 | 0.11 | 1 | HC_vs_MS.NoTrt_B |
| OR6J1     | 0.26991 | 0.43605 | 0.68  | 0.69 | 1 | HC_vs_MS.NoTrt_B |
| HIST1H2BE | 0.26992 | 0.65719 | 0.265 | 0.31 | 1 | HC_vs_MS.NoTrt_B |
| NLK       | 0.27021 | 1.25558 | 0.307 | 0.27 | 1 | HC_vs_MS.NoTrt_B |
| OR52I1    | 0.27051 | 0.57014 | 0.458 | 0.44 | 1 | HC_vs_MS.NoTrt_B |
| NRBP1     | 0.27057 | -0.2904 | 0.593 | 0.63 | 1 | HC_vs_MS.NoTrt_B |
| NAPEPLD   | 0.27082 | 0.64394 | 0.32  | 0.29 | 1 | HC_vs_MS.NoTrt_B |
| PTPN2     | 0.27136 | -0.3528 | 0.965 | 0.98 | 1 | HC_vs_MS.NoTrt_B |
| UFL1      | 0.27143 | 0.4189  | 0.152 | 0.19 | 1 | HC_vs_MS.NoTrt_B |
| KIAA1755  | 0.27147 | 0.39782 | 0.194 | 0.17 | 1 | HC_vs_MS.NoTrt_B |
| THAP12    | 0.27152 | 0.50549 | 0.596 | 0.59 | 1 | HC_vs_MS.NoTrt_B |
| RIC1      | 0.27159 | 0.68979 | 0.103 | 0.08 | 1 | HC_vs_MS.NoTrt_B |
| CABYR     | 0.27185 | 0.33505 | 0.486 | 0.49 | 1 | HC_vs_MS.NoTrt_B |
| ZSWIM1    | 0.27255 | 0.35224 | 0.681 | 0.76 | 1 | HC_vs_MS.NoTrt_B |
| CACNA1F   | 0.27287 | 0.29838 | 0.251 | 0.22 | 1 | HC_vs_MS.NoTrt_B |
| ACBD4     | 0.27295 | -0.5623 | 0.317 | 0.35 | 1 | HC_vs_MS.NoTrt_B |
| REST      | 0.27313 | 0.33428 | 0.17  | 0.21 | 1 | HC_vs_MS.NoTrt_B |
| LYN       | 0.27322 | 0.27252 | 0.587 | 0.61 | 1 | HC_vs_MS.NoTrt_B |
| FANCF     | 0.2735  | 0.37317 | 0.236 | 0.2  | 1 | HC_vs_MS.NoTrt_B |
| B3GALT5   | 0.27362 | 0.30911 | 0.342 | 0.32 | 1 | HC_vs_MS.NoTrt_B |
| RTCA      | 0.27364 | -0.4008 | 0.526 | 0.57 | 1 | HC_vs_MS.NoTrt_B |
| CDKN2AIP  | 0.27427 | -0.2591 | 0.078 | 0.1  | 1 | HC_vs_MS.NoTrt_B |
| PCNX2     | 0.27428 | 0.29389 | 0.925 | 0.95 | 1 | HC_vs_MS.NoTrt_B |
| MLST8     | 0.27503 | -0.2801 | 0.355 | 0.4  | 1 | HC_vs_MS.NoTrt_B |
| NXF1      | 0.27536 | 0.26707 | 0.559 | 0.64 | 1 | HC_vs_MS.NoTrt_B |
| GDF11     | 0.27569 | 0.45345 | 0.325 | 0.29 | 1 | HC_vs_MS.NoTrt_B |
| SLC1A4    | 0.27587 | 0.73995 | 0.574 | 0.61 | 1 | HC_vs_MS.NoTrt_B |
| ZDHC17    | 0.27591 | 0.53459 | 0.345 | 0.3  | 1 | HC_vs_MS.NoTrt_B |
| SLC27A5   | 0.27604 | 0.29677 | 0.864 | 0.89 | 1 | HC_vs_MS.NoTrt_B |
| MYO1F     | 0.27623 | -0.262  | 0.848 | 0.85 | 1 | HC_vs_MS.NoTrt_B |
| SLC13A3   | 0.27626 | 0.34877 | 0.299 | 0.28 | 1 | HC_vs_MS.NoTrt_B |
| PON2      | 0.27684 | 1.45831 | 0.42  | 0.41 | 1 | HC_vs_MS.NoTrt_B |
| DIAPH3    | 0.27701 | 0.45816 | 0.329 | 0.3  | 1 | HC_vs_MS.NoTrt_B |
| FAM120C   | 0.2771  | 0.69403 | 0.274 | 0.25 | 1 | HC_vs_MS.NoTrt_B |
| CTSC      | 0.27732 | -0.321  | 0.894 | 0.92 | 1 | HC_vs_MS.NoTrt_B |

|          |         |         |       |      |   |                  |
|----------|---------|---------|-------|------|---|------------------|
| STEAP3   | 0.27758 | 0.5027  | 0.116 | 0.15 | 1 | HC_vs_MS.NoTrt_B |
| SLC22A18 | 0.27876 | 1.07824 | 0.503 | 0.6  | 1 | HC_vs_MS.NoTrt_B |
| AP1G1    | 0.27899 | 0.3536  | 0.667 | 0.74 | 1 | HC_vs_MS.NoTrt_B |
| ERCC6L   | 0.27938 | 0.87446 | 0.117 | 0.15 | 1 | HC_vs_MS.NoTrt_B |
| GP6      | 0.27955 | 0.41558 | 0.459 | 0.44 | 1 | HC_vs_MS.NoTrt_B |
| ANKRD13D | 0.28008 | 0.26532 | 0.668 | 0.67 | 1 | HC_vs_MS.NoTrt_B |
| FASTKD1  | 0.28095 | -0.2912 | 0.23  | 0.27 | 1 | HC_vs_MS.NoTrt_B |
| ZNF71    | 0.28105 | 0.97759 | 0.204 | 0.25 | 1 | HC_vs_MS.NoTrt_B |
| MED25    | 0.28151 | 0.85002 | 0.486 | 0.45 | 1 | HC_vs_MS.NoTrt_B |
| GSKIP    | 0.28211 | -0.419  | 0.096 | 0.12 | 1 | HC_vs_MS.NoTrt_B |
| HECTD3   | 0.28249 | 1.15612 | 0.129 | 0.1  | 1 | HC_vs_MS.NoTrt_B |
| FBXL20   | 0.28266 | 0.26151 | 0.912 | 0.9  | 1 | HC_vs_MS.NoTrt_B |
| NOL6     | 0.28291 | -0.5676 | 0.372 | 0.42 | 1 | HC_vs_MS.NoTrt_B |
| ZNF224   | 0.28302 | 0.90378 | 0.458 | 0.47 | 1 | HC_vs_MS.NoTrt_B |
| EID2B    | 0.28312 | -0.3047 | 0.523 | 0.5  | 1 | HC_vs_MS.NoTrt_B |
| OSBPL10  | 0.28366 | 0.498   | 0.391 | 0.35 | 1 | HC_vs_MS.NoTrt_B |
| PABPC1   | 0.28378 | 0.26387 | 0.93  | 0.95 | 1 | HC_vs_MS.NoTrt_B |
| MDM4     | 0.28414 | 0.3096  | 0.991 | 1    | 1 | HC_vs_MS.NoTrt_B |
| PATL1    | 0.28423 | 0.38989 | 0.133 | 0.17 | 1 | HC_vs_MS.NoTrt_B |
| FGFR4    | 0.2844  | 0.54976 | 0.393 | 0.36 | 1 | HC_vs_MS.NoTrt_B |
| NRP2     | 0.28455 | 0.32696 | 0.372 | 0.35 | 1 | HC_vs_MS.NoTrt_B |
| IFFO2    | 0.28466 | 0.54671 | 0.123 | 0.1  | 1 | HC_vs_MS.NoTrt_B |
| MDFIC    | 0.28485 | 0.52466 | 0.296 | 0.35 | 1 | HC_vs_MS.NoTrt_B |
| ITGAX    | 0.28486 | 0.30033 | 0.471 | 0.54 | 1 | HC_vs_MS.NoTrt_B |
| DHRS2    | 0.28513 | 0.35427 | 0.329 | 0.3  | 1 | HC_vs_MS.NoTrt_B |
| PPM1L    | 0.28558 | 0.41542 | 0.236 | 0.2  | 1 | HC_vs_MS.NoTrt_B |
| CCDC88B  | 0.28561 | 0.56702 | 0.759 | 0.82 | 1 | HC_vs_MS.NoTrt_B |
| CRX      | 0.28584 | 0.30795 | 0.697 | 0.76 | 1 | HC_vs_MS.NoTrt_B |
| HACE1    | 0.28592 | 0.30423 | 0.655 | 0.65 | 1 | HC_vs_MS.NoTrt_B |
| BAZ2A    | 0.28608 | 0.38609 | 0.665 | 0.68 | 1 | HC_vs_MS.NoTrt_B |
| SFXN3    | 0.28622 | -0.408  | 0.323 | 0.35 | 1 | HC_vs_MS.NoTrt_B |
| VPS13B   | 0.28623 | 0.40746 | 0.735 | 0.71 | 1 | HC_vs_MS.NoTrt_B |
| NUP210   | 0.28629 | 0.67755 | 0.52  | 0.5  | 1 | HC_vs_MS.NoTrt_B |
| CD302    | 0.28643 | 0.98825 | 0.326 | 0.29 | 1 | HC_vs_MS.NoTrt_B |
| SCYL2    | 0.28651 | 0.34551 | 0.11  | 0.14 | 1 | HC_vs_MS.NoTrt_B |
| GSE1     | 0.28665 | 1.23496 | 0.338 | 0.32 | 1 | HC_vs_MS.NoTrt_B |
| PIP5K1A  | 0.28678 | -0.2901 | 0.493 | 0.54 | 1 | HC_vs_MS.NoTrt_B |
| BNIP3L   | 0.28736 | -0.2551 | 0.181 | 0.21 | 1 | HC_vs_MS.NoTrt_B |
| SGK494   | 0.28757 | 0.25841 | 0.738 | 0.71 | 1 | HC_vs_MS.NoTrt_B |
| TNFSF14  | 0.28764 | 0.48369 | 0.606 | 0.64 | 1 | HC_vs_MS.NoTrt_B |

|            |         |         |       |      |   |                  |
|------------|---------|---------|-------|------|---|------------------|
| PTRF       | 0.28782 | 0.29199 | 0.352 | 0.33 | 1 | HC_vs_MS.NoTrt_B |
| CGGBP1     | 0.28789 | 0.48381 | 0.18  | 0.22 | 1 | HC_vs_MS.NoTrt_B |
| TRIM25     | 0.28811 | 1.14202 | 0.33  | 0.3  | 1 | HC_vs_MS.NoTrt_B |
| KCNG4      | 0.28817 | 0.25064 | 0.548 | 0.52 | 1 | HC_vs_MS.NoTrt_B |
| DNAJB14    | 0.28826 | 0.44155 | 0.48  | 0.52 | 1 | HC_vs_MS.NoTrt_B |
| ALDH3B1    | 0.28859 | 0.25894 | 0.735 | 0.76 | 1 | HC_vs_MS.NoTrt_B |
| APC        | 0.28873 | 0.26921 | 0.501 | 0.46 | 1 | HC_vs_MS.NoTrt_B |
| EIF1AY     | 0.28989 | -0.7459 | 0.609 | 0.65 | 1 | HC_vs_MS.NoTrt_B |
| C9orf64    | 0.29016 | 0.54492 | 0.596 | 0.59 | 1 | HC_vs_MS.NoTrt_B |
| NARF       | 0.29022 | -0.2617 | 0.959 | 0.97 | 1 | HC_vs_MS.NoTrt_B |
| TBC1D7     | 0.29043 | 0.93066 | 0.513 | 0.48 | 1 | HC_vs_MS.NoTrt_B |
| SERINC1    | 0.29082 | 0.38964 | 0.645 | 0.63 | 1 | HC_vs_MS.NoTrt_B |
| SNX11      | 0.29095 | 0.42818 | 0.645 | 0.65 | 1 | HC_vs_MS.NoTrt_B |
| GMEB1      | 0.29116 | 0.42569 | 0.803 | 0.84 | 1 | HC_vs_MS.NoTrt_B |
| CDCP1      | 0.2914  | 1.42267 | 0.43  | 0.38 | 1 | HC_vs_MS.NoTrt_B |
| TMEM87B    | 0.29179 | 0.73678 | 0.109 | 0.14 | 1 | HC_vs_MS.NoTrt_B |
| CDAN1      | 0.29188 | 0.2931  | 0.43  | 0.41 | 1 | HC_vs_MS.NoTrt_B |
| TSEN15     | 0.29206 | -0.5745 | 0.201 | 0.23 | 1 | HC_vs_MS.NoTrt_B |
| OTOA       | 0.2921  | 0.32909 | 0.358 | 0.33 | 1 | HC_vs_MS.NoTrt_B |
| CPPED1     | 0.29228 | -0.6363 | 0.593 | 0.57 | 1 | HC_vs_MS.NoTrt_B |
| CCDC163    | 0.29238 | -0.2661 | 0.538 | 0.58 | 1 | HC_vs_MS.NoTrt_B |
| AP3M1      | 0.29282 | 0.40473 | 0.484 | 0.44 | 1 | HC_vs_MS.NoTrt_B |
| NEDD1      | 0.29351 | -0.3015 | 0.094 | 0.12 | 1 | HC_vs_MS.NoTrt_B |
| TPM1       | 0.29367 | 0.42287 | 0.493 | 0.45 | 1 | HC_vs_MS.NoTrt_B |
| PSTK       | 0.29367 | -0.5618 | 0.338 | 0.29 | 1 | HC_vs_MS.NoTrt_B |
| RP11-347C1 | 0.29399 | 0.42922 | 0.664 | 0.7  | 1 | HC_vs_MS.NoTrt_B |
| C2CD2L     | 0.29415 | 0.52138 | 0.409 | 0.47 | 1 | HC_vs_MS.NoTrt_B |
| CTD-3105H1 | 0.29467 | 0.29061 | 0.27  | 0.24 | 1 | HC_vs_MS.NoTrt_B |
| SLC16A7    | 0.29486 | 0.28728 | 0.628 | 0.6  | 1 | HC_vs_MS.NoTrt_B |
| ARMC10     | 0.29504 | 0.69999 | 0.632 | 0.64 | 1 | HC_vs_MS.NoTrt_B |
| ANKDD1A    | 0.29559 | 0.47328 | 0.522 | 0.52 | 1 | HC_vs_MS.NoTrt_B |
| LAP3       | 0.29588 | -0.2801 | 0.119 | 0.15 | 1 | HC_vs_MS.NoTrt_B |
| TMEM183A   | 0.29596 | 0.68677 | 0.183 | 0.15 | 1 | HC_vs_MS.NoTrt_B |
| TLN1       | 0.29618 | 0.85261 | 0.575 | 0.57 | 1 | HC_vs_MS.NoTrt_B |
| TDRD1      | 0.29638 | 0.49513 | 0.168 | 0.14 | 1 | HC_vs_MS.NoTrt_B |
| CRKL       | 0.29709 | 0.67046 | 0.574 | 0.57 | 1 | HC_vs_MS.NoTrt_B |
| C5orf63    | 0.2975  | -0.2918 | 0.335 | 0.37 | 1 | HC_vs_MS.NoTrt_B |
| TMOD2      | 0.29759 | 0.26363 | 0.454 | 0.47 | 1 | HC_vs_MS.NoTrt_B |
| UVRAG      | 0.29782 | 0.2633  | 0.423 | 0.5  | 1 | HC_vs_MS.NoTrt_B |
| SH3RF2     | 0.29785 | -0.5469 | 0.165 | 0.14 | 1 | HC_vs_MS.NoTrt_B |



|            |         |         |       |      |   |                  |
|------------|---------|---------|-------|------|---|------------------|
| CLDN4      | 0.29791 | 0.72266 | 0.543 | 0.64 | 1 | HC_vs_MS.NoTrt_B |
| MARK2      | 0.29826 | 0.45617 | 0.13  | 0.1  | 1 | HC_vs_MS.NoTrt_B |
| CTSW       | 0.29837 | -0.4575 | 0.622 | 0.56 | 1 | HC_vs_MS.NoTrt_B |
| ZNF699     | 0.29854 | 0.36061 | 0.251 | 0.29 | 1 | HC_vs_MS.NoTrt_B |
| MRPS25     | 0.29914 | 0.26216 | 0.487 | 0.44 | 1 | HC_vs_MS.NoTrt_B |
| TRA2B      | 0.29928 | 0.43452 | 0.543 | 0.51 | 1 | HC_vs_MS.NoTrt_B |
| ZNF85      | 0.29968 | -0.3419 | 0.652 | 0.72 | 1 | HC_vs_MS.NoTrt_B |
| CD38       | 0.30112 | 1.23157 | 0.335 | 0.31 | 1 | HC_vs_MS.NoTrt_B |
| KANK3      | 0.30134 | 0.47132 | 0.201 | 0.24 | 1 | HC_vs_MS.NoTrt_B |
| SLC35E4    | 0.30178 | 0.48775 | 0.333 | 0.3  | 1 | HC_vs_MS.NoTrt_B |
| NUP43      | 0.30195 | 0.28692 | 0.843 | 0.8  | 1 | HC_vs_MS.NoTrt_B |
| JMJD7-PLA2 | 0.30223 | 0.27154 | 0.386 | 0.43 | 1 | HC_vs_MS.NoTrt_B |
| ITGB5      | 0.30248 | 0.25207 | 0.328 | 0.38 | 1 | HC_vs_MS.NoTrt_B |
| ATXN1L     | 0.3028  | 0.5807  | 0.078 | 0.1  | 1 | HC_vs_MS.NoTrt_B |
| GADL1      | 0.30284 | 0.47124 | 0.622 | 0.7  | 1 | HC_vs_MS.NoTrt_B |
| FDPS       | 0.30295 | -0.4389 | 0.445 | 0.48 | 1 | HC_vs_MS.NoTrt_B |
| GGT6       | 0.3035  | 0.2923  | 0.454 | 0.43 | 1 | HC_vs_MS.NoTrt_B |
| CCDC159    | 0.3043  | -0.4492 | 0.765 | 0.84 | 1 | HC_vs_MS.NoTrt_B |
| SRSF10     | 0.30436 | 0.3748  | 0.722 | 0.79 | 1 | HC_vs_MS.NoTrt_B |
| NME7       | 0.30457 | 0.39627 | 0.622 | 0.64 | 1 | HC_vs_MS.NoTrt_B |
| TSC2       | 0.30469 | 0.45529 | 0.684 | 0.68 | 1 | HC_vs_MS.NoTrt_B |
| USP31      | 0.30542 | 0.33017 | 0.135 | 0.11 | 1 | HC_vs_MS.NoTrt_B |
| ZNF233     | 0.30561 | 0.40608 | 0.467 | 0.48 | 1 | HC_vs_MS.NoTrt_B |
| ZC3H13     | 0.30577 | 0.3552  | 0.326 | 0.29 | 1 | HC_vs_MS.NoTrt_B |
| DET1       | 0.30612 | 1.11749 | 0.536 | 0.5  | 1 | HC_vs_MS.NoTrt_B |
| MBTPS2     | 0.30618 | 0.49811 | 0.312 | 0.28 | 1 | HC_vs_MS.NoTrt_B |
| MIB2       | 0.30626 | 1.27913 | 0.177 | 0.22 | 1 | HC_vs_MS.NoTrt_B |
| PLS3       | 0.30651 | 0.25172 | 0.358 | 0.43 | 1 | HC_vs_MS.NoTrt_B |
| TESMIN     | 0.30658 | 0.3651  | 0.629 | 0.7  | 1 | HC_vs_MS.NoTrt_B |
| ZNF680     | 0.30673 | 0.79944 | 0.096 | 0.12 | 1 | HC_vs_MS.NoTrt_B |
| C10orf82   | 0.30677 | 0.29001 | 0.535 | 0.54 | 1 | HC_vs_MS.NoTrt_B |
| YTHDC2     | 0.30682 | 0.84429 | 0.416 | 0.39 | 1 | HC_vs_MS.NoTrt_B |
| BNIP3      | 0.30697 | 0.2685  | 0.583 | 0.68 | 1 | HC_vs_MS.NoTrt_B |
| EPPIN      | 0.30701 | 0.41051 | 0.462 | 0.47 | 1 | HC_vs_MS.NoTrt_B |
| ERAP1      | 0.30725 | 0.98371 | 0.584 | 0.62 | 1 | HC_vs_MS.NoTrt_B |
| NDUFAF1    | 0.30748 | 0.45126 | 0.365 | 0.42 | 1 | HC_vs_MS.NoTrt_B |
| ZC3H3      | 0.30813 | 0.53738 | 0.125 | 0.1  | 1 | HC_vs_MS.NoTrt_B |
| MAP3K10    | 0.30832 | 0.4401  | 0.354 | 0.34 | 1 | HC_vs_MS.NoTrt_B |
| CENPV      | 0.30844 | 0.33045 | 0.71  | 0.71 | 1 | HC_vs_MS.NoTrt_B |
| CD160      | 0.30846 | 0.60138 | 0.294 | 0.27 | 1 | HC_vs_MS.NoTrt_B |

|           |         |         |       |      |   |                  |
|-----------|---------|---------|-------|------|---|------------------|
| TRRAP     | 0.30872 | 0.3536  | 0.158 | 0.13 | 1 | HC_vs_MS.NoTrt_B |
| LSM6      | 0.30888 | 0.31715 | 0.13  | 0.16 | 1 | HC_vs_MS.NoTrt_B |
| ARHGAP11B | 0.30901 | -0.2671 | 0.204 | 0.23 | 1 | HC_vs_MS.NoTrt_B |
| SLC16A5   | 0.30925 | 0.71463 | 0.154 | 0.12 | 1 | HC_vs_MS.NoTrt_B |
| NELFCD    | 0.30955 | 0.25079 | 0.519 | 0.57 | 1 | HC_vs_MS.NoTrt_B |
| LRPPRC    | 0.3096  | 0.51883 | 0.519 | 0.54 | 1 | HC_vs_MS.NoTrt_B |
| C1orf167  | 0.30987 | 0.26003 | 0.632 | 0.65 | 1 | HC_vs_MS.NoTrt_B |
| C2orf68   | 0.30995 | 0.28097 | 0.822 | 0.77 | 1 | HC_vs_MS.NoTrt_B |
| FUT6      | 0.31014 | 0.4751  | 0.404 | 0.47 | 1 | HC_vs_MS.NoTrt_B |
| WDTC1     | 0.31057 | 0.40228 | 0.359 | 0.35 | 1 | HC_vs_MS.NoTrt_B |
| SF3A1     | 0.31065 | 0.312   | 0.349 | 0.43 | 1 | HC_vs_MS.NoTrt_B |
| BAZ1A     | 0.31152 | 0.27692 | 0.374 | 0.34 | 1 | HC_vs_MS.NoTrt_B |
| RNF130    | 0.31155 | -0.275  | 0.633 | 0.67 | 1 | HC_vs_MS.NoTrt_B |
| FAM234B   | 0.31178 | -0.7043 | 0.414 | 0.38 | 1 | HC_vs_MS.NoTrt_B |
| PMS2      | 0.31213 | 0.76357 | 0.662 | 0.7  | 1 | HC_vs_MS.NoTrt_B |
| BEND2     | 0.31216 | 0.26862 | 0.555 | 0.58 | 1 | HC_vs_MS.NoTrt_B |
| SERPINB9  | 0.31231 | 0.5656  | 0.699 | 0.8  | 1 | HC_vs_MS.NoTrt_B |
| COL28A1   | 0.3125  | 0.33371 | 0.428 | 0.41 | 1 | HC_vs_MS.NoTrt_B |
| KIAA1210  | 0.31288 | -0.2533 | 0.203 | 0.23 | 1 | HC_vs_MS.NoTrt_B |
| SKIL      | 0.31308 | 0.46891 | 0.277 | 0.24 | 1 | HC_vs_MS.NoTrt_B |
| OSBPL9    | 0.31349 | 0.51912 | 0.328 | 0.3  | 1 | HC_vs_MS.NoTrt_B |
| ACOT4     | 0.31367 | -0.4845 | 0.1   | 0.12 | 1 | HC_vs_MS.NoTrt_B |
| SYNRG     | 0.31406 | 0.31764 | 0.929 | 0.96 | 1 | HC_vs_MS.NoTrt_B |
| PIAS3     | 0.31425 | 0.42204 | 0.113 | 0.14 | 1 | HC_vs_MS.NoTrt_B |
| OTUD5     | 0.31449 | -0.3206 | 0.125 | 0.15 | 1 | HC_vs_MS.NoTrt_B |
| EML6      | 0.31461 | 0.35687 | 0.578 | 0.57 | 1 | HC_vs_MS.NoTrt_B |
| HAUS2     | 0.31494 | 0.25858 | 0.794 | 0.83 | 1 | HC_vs_MS.NoTrt_B |
| NRIP2     | 0.31502 | 0.71073 | 0.336 | 0.32 | 1 | HC_vs_MS.NoTrt_B |
| ADAD2     | 0.31508 | 0.29107 | 0.225 | 0.28 | 1 | HC_vs_MS.NoTrt_B |
| CD300LD   | 0.31557 | 0.27803 | 0.362 | 0.32 | 1 | HC_vs_MS.NoTrt_B |
| IFI27     | 0.31587 | 0.35528 | 0.355 | 0.34 | 1 | HC_vs_MS.NoTrt_B |
| HPS1      | 0.31625 | 0.34827 | 0.6   | 0.65 | 1 | HC_vs_MS.NoTrt_B |
| KDELRL1   | 0.31626 | 0.46176 | 0.243 | 0.21 | 1 | HC_vs_MS.NoTrt_B |
| CAMTA2    | 0.31628 | 0.32364 | 0.501 | 0.45 | 1 | HC_vs_MS.NoTrt_B |
| EIF4A3    | 0.31715 | -0.4176 | 0.649 | 0.71 | 1 | HC_vs_MS.NoTrt_B |
| TRIM2     | 0.3174  | 0.9182  | 0.23  | 0.21 | 1 | HC_vs_MS.NoTrt_B |
| MKL2      | 0.31746 | 0.74961 | 0.696 | 0.72 | 1 | HC_vs_MS.NoTrt_B |
| STRBP     | 0.31762 | -0.5416 | 0.63  | 0.61 | 1 | HC_vs_MS.NoTrt_B |
| CES2      | 0.31771 | -0.3477 | 0.316 | 0.27 | 1 | HC_vs_MS.NoTrt_B |
| FAM63A    | 0.31827 | 0.53947 | 0.509 | 0.58 | 1 | HC_vs_MS.NoTrt_B |

|            |         |         |       |      |   |                  |
|------------|---------|---------|-------|------|---|------------------|
| LEKR1      | 0.31837 | -0.3904 | 0.174 | 0.21 | 1 | HC_vs_MS.NoTrt_B |
| ACSM3      | 0.31856 | 0.3389  | 0.594 | 0.6  | 1 | HC_vs_MS.NoTrt_B |
| LARP1      | 0.3187  | 0.50487 | 0.18  | 0.15 | 1 | HC_vs_MS.NoTrt_B |
| SCML4      | 0.31916 | 0.72169 | 0.629 | 0.64 | 1 | HC_vs_MS.NoTrt_B |
| SYT11      | 0.31932 | -0.3233 | 0.616 | 0.63 | 1 | HC_vs_MS.NoTrt_B |
| WAPL       | 0.31947 | 0.65888 | 0.452 | 0.45 | 1 | HC_vs_MS.NoTrt_B |
| RBM10      | 0.3196  | 0.53047 | 0.175 | 0.15 | 1 | HC_vs_MS.NoTrt_B |
| UBE2G1     | 0.32003 | 0.29132 | 0.22  | 0.26 | 1 | HC_vs_MS.NoTrt_B |
| OAS1       | 0.32012 | 0.28578 | 0.503 | 0.49 | 1 | HC_vs_MS.NoTrt_B |
| SMC5       | 0.32027 | 0.34143 | 0.386 | 0.35 | 1 | HC_vs_MS.NoTrt_B |
| ALG10B     | 0.32042 | 0.25948 | 0.639 | 0.62 | 1 | HC_vs_MS.NoTrt_B |
| MSMO1      | 0.32046 | 0.68061 | 0.525 | 0.52 | 1 | HC_vs_MS.NoTrt_B |
| PARP10     | 0.3207  | 0.67146 | 0.157 | 0.13 | 1 | HC_vs_MS.NoTrt_B |
| RUNDC1     | 0.3213  | 0.64156 | 0.701 | 0.69 | 1 | HC_vs_MS.NoTrt_B |
| RIOK3      | 0.32138 | 0.34926 | 0.514 | 0.48 | 1 | HC_vs_MS.NoTrt_B |
| ZNF879     | 0.32148 | 0.40545 | 0.312 | 0.36 | 1 | HC_vs_MS.NoTrt_B |
| NPIPA7     | 0.32151 | 0.26334 | 0.154 | 0.19 | 1 | HC_vs_MS.NoTrt_B |
| ATG16L1    | 0.32207 | 0.53674 | 0.112 | 0.09 | 1 | HC_vs_MS.NoTrt_B |
| GIPR       | 0.32207 | 0.28686 | 0.619 | 0.69 | 1 | HC_vs_MS.NoTrt_B |
| HYAL4      | 0.32222 | 0.40977 | 0.572 | 0.56 | 1 | HC_vs_MS.NoTrt_B |
| POM121C    | 0.32223 | 0.28179 | 0.494 | 0.52 | 1 | HC_vs_MS.NoTrt_B |
| GDNF       | 0.32225 | 0.27508 | 0.294 | 0.27 | 1 | HC_vs_MS.NoTrt_B |
| RFX7       | 0.32235 | 0.40898 | 0.13  | 0.16 | 1 | HC_vs_MS.NoTrt_B |
| NAA40      | 0.3226  | -0.3563 | 0.548 | 0.53 | 1 | HC_vs_MS.NoTrt_B |
| AL354822.1 | 0.32277 | 0.53208 | 0.242 | 0.21 | 1 | HC_vs_MS.NoTrt_B |
| CCDC18     | 0.32314 | -0.2868 | 0.159 | 0.19 | 1 | HC_vs_MS.NoTrt_B |
| KHDRBS1    | 0.3234  | 0.91491 | 0.183 | 0.16 | 1 | HC_vs_MS.NoTrt_B |
| SIDT1      | 0.32352 | 0.4317  | 0.781 | 0.74 | 1 | HC_vs_MS.NoTrt_B |
| FAM110C    | 0.32355 | 0.69367 | 0.242 | 0.29 | 1 | HC_vs_MS.NoTrt_B |
| PRPF8      | 0.3239  | -0.2641 | 0.868 | 0.87 | 1 | HC_vs_MS.NoTrt_B |
| HNRNPUL2   | 0.32484 | -0.3162 | 0.084 | 0.11 | 1 | HC_vs_MS.NoTrt_B |
| FGF9       | 0.32549 | 0.47025 | 0.13  | 0.1  | 1 | HC_vs_MS.NoTrt_B |
| MCEE       | 0.32597 | 0.70836 | 0.129 | 0.16 | 1 | HC_vs_MS.NoTrt_B |
| DHX36      | 0.32604 | 0.48622 | 0.713 | 0.77 | 1 | HC_vs_MS.NoTrt_B |
| RALGPS2    | 0.32614 | 0.34833 | 0.354 | 0.32 | 1 | HC_vs_MS.NoTrt_B |
| ALG6       | 0.32632 | 0.46033 | 0.101 | 0.13 | 1 | HC_vs_MS.NoTrt_B |
| SERPINH1   | 0.32656 | 0.94967 | 0.304 | 0.36 | 1 | HC_vs_MS.NoTrt_B |
| BRAF       | 0.32676 | 0.97361 | 0.106 | 0.14 | 1 | HC_vs_MS.NoTrt_B |
| ZDHC24     | 0.32712 | 0.25306 | 0.864 | 0.91 | 1 | HC_vs_MS.NoTrt_B |
| CEP85L     | 0.32726 | 0.49667 | 0.258 | 0.3  | 1 | HC_vs_MS.NoTrt_B |

|          |         |         |       |      |   |                  |
|----------|---------|---------|-------|------|---|------------------|
| CCDC126  | 0.3274  | 0.59673 | 0.116 | 0.15 | 1 | HC_vs_MS.NoTrt_B |
| RAB8B    | 0.32746 | 0.76841 | 0.178 | 0.23 | 1 | HC_vs_MS.NoTrt_B |
| SLC25A46 | 0.32751 | 0.43118 | 0.099 | 0.12 | 1 | HC_vs_MS.NoTrt_B |
| CRELD2   | 0.32754 | -0.6468 | 0.574 | 0.61 | 1 | HC_vs_MS.NoTrt_B |
| L3MBTL1  | 0.32755 | 0.47454 | 0.616 | 0.6  | 1 | HC_vs_MS.NoTrt_B |
| GINM1    | 0.32805 | -0.4949 | 0.529 | 0.48 | 1 | HC_vs_MS.NoTrt_B |
| NDUFB6   | 0.32815 | 0.25041 | 0.5   | 0.56 | 1 | HC_vs_MS.NoTrt_B |
| DEPDC1B  | 0.32827 | -0.9796 | 0.206 | 0.24 | 1 | HC_vs_MS.NoTrt_B |
| DUSP1    | 0.32885 | 1.09858 | 0.168 | 0.15 | 1 | HC_vs_MS.NoTrt_B |
| EBF2     | 0.32959 | 0.26121 | 0.288 | 0.26 | 1 | HC_vs_MS.NoTrt_B |
| TPO      | 0.3298  | 0.58384 | 0.228 | 0.27 | 1 | HC_vs_MS.NoTrt_B |
| HES2     | 0.3299  | 0.27463 | 0.587 | 0.6  | 1 | HC_vs_MS.NoTrt_B |
| KIF21B   | 0.33021 | 0.74877 | 0.378 | 0.37 | 1 | HC_vs_MS.NoTrt_B |
| CLSTN1   | 0.33027 | 0.36358 | 0.204 | 0.24 | 1 | HC_vs_MS.NoTrt_B |
| WDR59    | 0.33139 | 0.31948 | 0.954 | 0.94 | 1 | HC_vs_MS.NoTrt_B |
| SV2B     | 0.3322  | 0.75008 | 0.383 | 0.37 | 1 | HC_vs_MS.NoTrt_B |
| ADGRA3   | 0.33237 | 0.34696 | 0.393 | 0.39 | 1 | HC_vs_MS.NoTrt_B |
| CTIF     | 0.33261 | 0.92988 | 0.162 | 0.2  | 1 | HC_vs_MS.NoTrt_B |
| SAMD9L   | 0.33274 | 0.62995 | 0.191 | 0.16 | 1 | HC_vs_MS.NoTrt_B |
| ACTN1    | 0.33307 | 0.54178 | 0.599 | 0.63 | 1 | HC_vs_MS.NoTrt_B |
| SLC38A2  | 0.33359 | 0.55432 | 0.239 | 0.21 | 1 | HC_vs_MS.NoTrt_B |
| NT5C3B   | 0.33404 | 0.837   | 0.616 | 0.64 | 1 | HC_vs_MS.NoTrt_B |
| NOL11    | 0.33442 | -0.3502 | 0.53  | 0.49 | 1 | HC_vs_MS.NoTrt_B |
| SF3A2    | 0.33443 | 0.63209 | 0.365 | 0.34 | 1 | HC_vs_MS.NoTrt_B |
| TUBD1    | 0.3346  | 0.43135 | 0.822 | 0.8  | 1 | HC_vs_MS.NoTrt_B |
| TMPO     | 0.33464 | 0.29798 | 0.535 | 0.5  | 1 | HC_vs_MS.NoTrt_B |
| PRPF38B  | 0.33465 | 0.26403 | 0.47  | 0.52 | 1 | HC_vs_MS.NoTrt_B |
| COQ10A   | 0.33471 | 0.85075 | 0.475 | 0.47 | 1 | HC_vs_MS.NoTrt_B |
| RAB5A    | 0.33501 | 0.31436 | 0.113 | 0.14 | 1 | HC_vs_MS.NoTrt_B |
| KANK1    | 0.33629 | -0.2899 | 0.701 | 0.71 | 1 | HC_vs_MS.NoTrt_B |
| TCF20    | 0.33671 | 0.45925 | 0.109 | 0.14 | 1 | HC_vs_MS.NoTrt_B |
| CABIN1   | 0.33724 | 0.6065  | 0.255 | 0.23 | 1 | HC_vs_MS.NoTrt_B |
| PDCD6    | 0.33781 | -0.485  | 0.667 | 0.71 | 1 | HC_vs_MS.NoTrt_B |
| F3       | 0.33791 | 0.41747 | 0.497 | 0.52 | 1 | HC_vs_MS.NoTrt_B |
| SLC46A3  | 0.33804 | 0.6139  | 0.078 | 0.1  | 1 | HC_vs_MS.NoTrt_B |
| IMMT     | 0.33807 | -0.3601 | 0.443 | 0.48 | 1 | HC_vs_MS.NoTrt_B |
| CDH15    | 0.33901 | 0.50209 | 0.403 | 0.37 | 1 | HC_vs_MS.NoTrt_B |
| STYX     | 0.33919 | 0.35247 | 0.496 | 0.57 | 1 | HC_vs_MS.NoTrt_B |
| BTLA     | 0.33936 | 0.99686 | 0.154 | 0.18 | 1 | HC_vs_MS.NoTrt_B |
| FUT10    | 0.33942 | 0.46087 | 0.358 | 0.35 | 1 | HC_vs_MS.NoTrt_B |

|            |         |         |       |      |   |                  |
|------------|---------|---------|-------|------|---|------------------|
| TMEM17     | 0.33972 | 0.26144 | 0.497 | 0.49 | 1 | HC_vs_MS.NoTrt_B |
| VAC14      | 0.33996 | 0.35695 | 0.104 | 0.08 | 1 | HC_vs_MS.NoTrt_B |
| KDM6B      | 0.34027 | 0.47328 | 0.161 | 0.14 | 1 | HC_vs_MS.NoTrt_B |
| LMNB1      | 0.34076 | -0.4244 | 0.083 | 0.1  | 1 | HC_vs_MS.NoTrt_B |
| ZNF587     | 0.3413  | 0.33946 | 0.945 | 0.95 | 1 | HC_vs_MS.NoTrt_B |
| XBP1       | 0.34146 | 0.53108 | 0.093 | 0.12 | 1 | HC_vs_MS.NoTrt_B |
| TMEM185A   | 0.3417  | 0.38405 | 0.483 | 0.46 | 1 | HC_vs_MS.NoTrt_B |
| PRR19      | 0.34177 | 0.32011 | 0.693 | 0.75 | 1 | HC_vs_MS.NoTrt_B |
| NUP98      | 0.3419  | 0.32214 | 0.758 | 0.78 | 1 | HC_vs_MS.NoTrt_B |
| SEC23B     | 0.34212 | -0.3682 | 0.112 | 0.14 | 1 | HC_vs_MS.NoTrt_B |
| ZNF615     | 0.34214 | 1.18535 | 0.47  | 0.46 | 1 | HC_vs_MS.NoTrt_B |
| KLF13      | 0.34267 | 0.57792 | 0.297 | 0.35 | 1 | HC_vs_MS.NoTrt_B |
| EFTUD2     | 0.34269 | -0.3158 | 0.836 | 0.86 | 1 | HC_vs_MS.NoTrt_B |
| SLC35B4    | 0.34287 | 0.46102 | 0.533 | 0.54 | 1 | HC_vs_MS.NoTrt_B |
| TNKS2      | 0.34308 | 0.48788 | 0.259 | 0.3  | 1 | HC_vs_MS.NoTrt_B |
| ERN2       | 0.34317 | 0.25832 | 0.51  | 0.5  | 1 | HC_vs_MS.NoTrt_B |
| NAPG       | 0.34326 | 0.60694 | 0.571 | 0.58 | 1 | HC_vs_MS.NoTrt_B |
| HYPK       | 0.34351 | 0.38609 | 0.903 | 0.92 | 1 | HC_vs_MS.NoTrt_B |
| MANBA      | 0.3442  | 0.51447 | 0.181 | 0.15 | 1 | HC_vs_MS.NoTrt_B |
| ABRA       | 0.34456 | 0.52784 | 0.084 | 0.11 | 1 | HC_vs_MS.NoTrt_B |
| CHIT1      | 0.34458 | -1.072  | 0.09  | 0.11 | 1 | HC_vs_MS.NoTrt_B |
| RASAL3     | 0.34471 | 1.2962  | 0.184 | 0.16 | 1 | HC_vs_MS.NoTrt_B |
| OBSCN      | 0.34507 | 0.43763 | 0.213 | 0.18 | 1 | HC_vs_MS.NoTrt_B |
| TNFAIP3    | 0.34513 | 0.34947 | 0.355 | 0.42 | 1 | HC_vs_MS.NoTrt_B |
| PGGT1B     | 0.34558 | 0.66835 | 0.158 | 0.13 | 1 | HC_vs_MS.NoTrt_B |
| CTD-3088G3 | 0.3456  | 0.48625 | 0.51  | 0.5  | 1 | HC_vs_MS.NoTrt_B |
| PPP2R2D    | 0.34578 | 0.26763 | 0.622 | 0.64 | 1 | HC_vs_MS.NoTrt_B |
| CYSTM1     | 0.34591 | -0.486  | 0.265 | 0.3  | 1 | HC_vs_MS.NoTrt_B |
| PPP2R3C    | 0.34598 | -0.3145 | 0.138 | 0.16 | 1 | HC_vs_MS.NoTrt_B |
| LINC00371  | 0.34612 | 0.35624 | 0.136 | 0.11 | 1 | HC_vs_MS.NoTrt_B |
| WISP2      | 0.3463  | 0.28979 | 0.606 | 0.59 | 1 | HC_vs_MS.NoTrt_B |
| KIAA0825   | 0.3464  | 0.52233 | 0.294 | 0.27 | 1 | HC_vs_MS.NoTrt_B |
| RFWD2      | 0.34671 | 0.43854 | 0.291 | 0.34 | 1 | HC_vs_MS.NoTrt_B |
| WHSC1L1    | 0.34728 | 0.26961 | 0.596 | 0.69 | 1 | HC_vs_MS.NoTrt_B |
| NPAS2      | 0.34763 | 0.25349 | 0.426 | 0.4  | 1 | HC_vs_MS.NoTrt_B |
| DEPDC4     | 0.34785 | 0.60088 | 0.438 | 0.45 | 1 | HC_vs_MS.NoTrt_B |
| ZNF441     | 0.34787 | -0.5515 | 0.174 | 0.21 | 1 | HC_vs_MS.NoTrt_B |
| HIST2H4B   | 0.348   | 0.53729 | 0.123 | 0.15 | 1 | HC_vs_MS.NoTrt_B |
| FBXO3      | 0.3482  | 0.39924 | 0.291 | 0.33 | 1 | HC_vs_MS.NoTrt_B |
| MT-ATP8    | 0.34889 | 0.47481 | 0.71  | 0.84 | 1 | HC_vs_MS.NoTrt_B |

|          |         |         |       |      |   |                  |
|----------|---------|---------|-------|------|---|------------------|
| CNOT3    | 0.34895 | 0.56319 | 0.123 | 0.1  | 1 | HC_vs_MS.NoTrt_B |
| PCDHGB6  | 0.34933 | 0.42648 | 0.352 | 0.33 | 1 | HC_vs_MS.NoTrt_B |
| DNAJC11  | 0.34942 | -0.2779 | 0.168 | 0.2  | 1 | HC_vs_MS.NoTrt_B |
| CTNNA1   | 0.34945 | -0.5312 | 0.562 | 0.63 | 1 | HC_vs_MS.NoTrt_B |
| CSRP1    | 0.35021 | -0.5896 | 0.497 | 0.52 | 1 | HC_vs_MS.NoTrt_B |
| TAF13    | 0.35026 | 0.25468 | 0.116 | 0.09 | 1 | HC_vs_MS.NoTrt_B |
| HSPB11   | 0.35058 | 0.26006 | 0.764 | 0.74 | 1 | HC_vs_MS.NoTrt_B |
| ATXN2L   | 0.35108 | 0.55486 | 0.259 | 0.23 | 1 | HC_vs_MS.NoTrt_B |
| MORC3    | 0.35127 | 0.37256 | 0.486 | 0.44 | 1 | HC_vs_MS.NoTrt_B |
| ZBTB11   | 0.35129 | 1.03111 | 0.533 | 0.51 | 1 | HC_vs_MS.NoTrt_B |
| TMEM41B  | 0.35168 | 0.48718 | 0.806 | 0.87 | 1 | HC_vs_MS.NoTrt_B |
| GSN      | 0.35173 | -0.2938 | 0.554 | 0.56 | 1 | HC_vs_MS.NoTrt_B |
| GRK6     | 0.3518  | 0.48243 | 0.191 | 0.23 | 1 | HC_vs_MS.NoTrt_B |
| SPG21    | 0.35214 | -0.2583 | 0.872 | 0.88 | 1 | HC_vs_MS.NoTrt_B |
| CYB561   | 0.35219 | 0.69179 | 0.272 | 0.26 | 1 | HC_vs_MS.NoTrt_B |
| SULT1A1  | 0.35226 | -0.3352 | 0.535 | 0.6  | 1 | HC_vs_MS.NoTrt_B |
| MTA2     | 0.35241 | -0.3854 | 0.249 | 0.29 | 1 | HC_vs_MS.NoTrt_B |
| PRKCZ    | 0.35247 | 0.5409  | 0.239 | 0.21 | 1 | HC_vs_MS.NoTrt_B |
| TNK2     | 0.35267 | 0.76347 | 0.132 | 0.11 | 1 | HC_vs_MS.NoTrt_B |
| CKAP5    | 0.3531  | 0.68538 | 0.151 | 0.12 | 1 | HC_vs_MS.NoTrt_B |
| BOLL     | 0.3533  | 0.40776 | 0.154 | 0.13 | 1 | HC_vs_MS.NoTrt_B |
| ZNF212   | 0.35356 | -0.7444 | 0.371 | 0.33 | 1 | HC_vs_MS.NoTrt_B |
| GM2A     | 0.35452 | -0.3143 | 0.528 | 0.57 | 1 | HC_vs_MS.NoTrt_B |
| TJP1     | 0.35515 | 0.42733 | 0.165 | 0.15 | 1 | HC_vs_MS.NoTrt_B |
| PPP4R3A  | 0.35549 | 0.29631 | 0.204 | 0.24 | 1 | HC_vs_MS.NoTrt_B |
| TVP23A   | 0.35557 | 0.31394 | 0.454 | 0.52 | 1 | HC_vs_MS.NoTrt_B |
| IRS2     | 0.35559 | 0.41244 | 0.322 | 0.3  | 1 | HC_vs_MS.NoTrt_B |
| ING1     | 0.3557  | 0.26224 | 0.543 | 0.61 | 1 | HC_vs_MS.NoTrt_B |
| MGA      | 0.35573 | 0.39637 | 0.858 | 0.9  | 1 | HC_vs_MS.NoTrt_B |
| KIAA0430 | 0.35663 | 0.43858 | 0.28  | 0.32 | 1 | HC_vs_MS.NoTrt_B |
| HECA     | 0.35674 | 0.38561 | 0.548 | 0.61 | 1 | HC_vs_MS.NoTrt_B |
| FAM174B  | 0.35712 | -0.2999 | 0.12  | 0.1  | 1 | HC_vs_MS.NoTrt_B |
| MTRF1    | 0.35714 | -0.3381 | 0.528 | 0.57 | 1 | HC_vs_MS.NoTrt_B |
| MTA1     | 0.35751 | 0.36131 | 0.403 | 0.38 | 1 | HC_vs_MS.NoTrt_B |
| IFIT3    | 0.35774 | 0.81862 | 0.43  | 0.48 | 1 | HC_vs_MS.NoTrt_B |
| VPS26A   | 0.35815 | 0.41366 | 0.361 | 0.42 | 1 | HC_vs_MS.NoTrt_B |
| EIF1B    | 0.35881 | 0.37926 | 0.159 | 0.2  | 1 | HC_vs_MS.NoTrt_B |
| FAM189B  | 0.3589  | 0.42679 | 0.69  | 0.74 | 1 | HC_vs_MS.NoTrt_B |
| LSM14A   | 0.35912 | 0.32585 | 0.497 | 0.44 | 1 | HC_vs_MS.NoTrt_B |
| NOL10    | 0.3592  | 0.76055 | 0.133 | 0.16 | 1 | HC_vs_MS.NoTrt_B |

|             |         |         |       |      |   |                  |
|-------------|---------|---------|-------|------|---|------------------|
| PPP1R10     | 0.35932 | -0.322  | 0.486 | 0.5  | 1 | HC_vs_MS.NoTrt_B |
| FBXL8       | 0.35963 | 0.71689 | 0.539 | 0.55 | 1 | HC_vs_MS.NoTrt_B |
| SLX4        | 0.35996 | 1.13403 | 0.443 | 0.45 | 1 | HC_vs_MS.NoTrt_B |
| NAXE        | 0.35997 | -0.3195 | 0.107 | 0.13 | 1 | HC_vs_MS.NoTrt_B |
| EXOSC7      | 0.35998 | -0.3989 | 0.446 | 0.49 | 1 | HC_vs_MS.NoTrt_B |
| C7orf49     | 0.36007 | 0.32516 | 0.145 | 0.12 | 1 | HC_vs_MS.NoTrt_B |
| ZC3H12B     | 0.3604  | 1.29246 | 0.552 | 0.52 | 1 | HC_vs_MS.NoTrt_B |
| PLGRKT      | 0.3605  | -0.3663 | 0.09  | 0.11 | 1 | HC_vs_MS.NoTrt_B |
| ARHGAP5     | 0.36093 | 0.91201 | 0.497 | 0.49 | 1 | HC_vs_MS.NoTrt_B |
| ITGA5       | 0.36109 | -0.4011 | 0.103 | 0.12 | 1 | HC_vs_MS.NoTrt_B |
| LRP2BP      | 0.36109 | -0.4253 | 0.435 | 0.47 | 1 | HC_vs_MS.NoTrt_B |
| FAM229B     | 0.36143 | 0.39699 | 0.303 | 0.28 | 1 | HC_vs_MS.NoTrt_B |
| SELENBP1    | 0.36163 | 0.38229 | 0.275 | 0.24 | 1 | HC_vs_MS.NoTrt_B |
| HUWE1       | 0.36267 | 0.51155 | 0.452 | 0.42 | 1 | HC_vs_MS.NoTrt_B |
| MTHFS       | 0.36268 | 0.79634 | 0.138 | 0.11 | 1 | HC_vs_MS.NoTrt_B |
| COLEC11     | 0.36282 | 0.97606 | 0.367 | 0.34 | 1 | HC_vs_MS.NoTrt_B |
| ZNF207      | 0.36288 | 0.31179 | 0.913 | 0.9  | 1 | HC_vs_MS.NoTrt_B |
| AGL         | 0.36324 | 1.08662 | 0.13  | 0.11 | 1 | HC_vs_MS.NoTrt_B |
| ARL8B       | 0.36355 | 0.53662 | 0.378 | 0.35 | 1 | HC_vs_MS.NoTrt_B |
| PAPOLA      | 0.36419 | 0.45978 | 0.874 | 0.85 | 1 | HC_vs_MS.NoTrt_B |
| HIPK1       | 0.36438 | 0.56796 | 0.168 | 0.14 | 1 | HC_vs_MS.NoTrt_B |
| NSMCE2      | 0.36483 | -0.3766 | 0.538 | 0.61 | 1 | HC_vs_MS.NoTrt_B |
| ZNF391      | 0.36548 | -0.3712 | 0.184 | 0.22 | 1 | HC_vs_MS.NoTrt_B |
| SAMD4A      | 0.36592 | 0.62223 | 0.584 | 0.63 | 1 | HC_vs_MS.NoTrt_B |
| C2orf50     | 0.36608 | 0.49652 | 0.351 | 0.33 | 1 | HC_vs_MS.NoTrt_B |
| OR7A5       | 0.36649 | 0.29275 | 0.42  | 0.42 | 1 | HC_vs_MS.NoTrt_B |
| SH2D2A      | 0.36665 | 0.82151 | 0.171 | 0.15 | 1 | HC_vs_MS.NoTrt_B |
| RAPGEF6     | 0.36713 | 0.89433 | 0.536 | 0.54 | 1 | HC_vs_MS.NoTrt_B |
| TOR3A       | 0.36721 | -0.3798 | 0.828 | 0.85 | 1 | HC_vs_MS.NoTrt_B |
| NIPBL       | 0.36724 | 0.49582 | 0.584 | 0.57 | 1 | HC_vs_MS.NoTrt_B |
| CTC-454I21. | 0.3677  | 0.28163 | 0.199 | 0.17 | 1 | HC_vs_MS.NoTrt_B |
| TOP2B       | 0.36781 | 0.55326 | 0.261 | 0.23 | 1 | HC_vs_MS.NoTrt_B |
| ERI2        | 0.36801 | 0.4447  | 0.148 | 0.18 | 1 | HC_vs_MS.NoTrt_B |
| TSPAN6      | 0.36809 | 0.51744 | 0.53  | 0.55 | 1 | HC_vs_MS.NoTrt_B |
| MICALL1     | 0.3684  | 0.34772 | 0.462 | 0.55 | 1 | HC_vs_MS.NoTrt_B |
| ZNF337      | 0.36844 | 0.25468 | 0.081 | 0.1  | 1 | HC_vs_MS.NoTrt_B |
| PRPF4B      | 0.36859 | 0.30332 | 0.343 | 0.4  | 1 | HC_vs_MS.NoTrt_B |
| IL6ST       | 0.36875 | 0.60933 | 0.367 | 0.34 | 1 | HC_vs_MS.NoTrt_B |
| IRS1        | 0.36898 | -0.2609 | 0.11  | 0.09 | 1 | HC_vs_MS.NoTrt_B |
| TIMM23      | 0.3694  | 0.68774 | 0.239 | 0.22 | 1 | HC_vs_MS.NoTrt_B |

|           |         |         |       |      |   |                  |
|-----------|---------|---------|-------|------|---|------------------|
| TRAK2     | 0.36973 | 0.5501  | 0.197 | 0.24 | 1 | HC_vs_MS.NoTrt_B |
| CD209     | 0.36989 | 0.28043 | 0.433 | 0.43 | 1 | HC_vs_MS.NoTrt_B |
| MED20     | 0.36998 | -0.2874 | 0.314 | 0.36 | 1 | HC_vs_MS.NoTrt_B |
| AP2A2     | 0.36998 | 0.76239 | 0.616 | 0.64 | 1 | HC_vs_MS.NoTrt_B |
| TRIM69    | 0.37025 | -0.2789 | 0.829 | 0.82 | 1 | HC_vs_MS.NoTrt_B |
| ITPR3     | 0.37027 | 0.40788 | 0.119 | 0.15 | 1 | HC_vs_MS.NoTrt_B |
| TEN1-CDK3 | 0.37051 | 0.52    | 0.52  | 0.49 | 1 | HC_vs_MS.NoTrt_B |
| ATP10D    | 0.37076 | 0.90055 | 0.3   | 0.35 | 1 | HC_vs_MS.NoTrt_B |
| B3GAT2    | 0.37082 | 0.76329 | 0.151 | 0.12 | 1 | HC_vs_MS.NoTrt_B |
| GPATCH2L  | 0.37123 | 0.33528 | 0.67  | 0.78 | 1 | HC_vs_MS.NoTrt_B |
| FZD3      | 0.37123 | 0.57109 | 0.614 | 0.63 | 1 | HC_vs_MS.NoTrt_B |
| IL1R1     | 0.37147 | 0.28567 | 0.317 | 0.29 | 1 | HC_vs_MS.NoTrt_B |
| CTBP1     | 0.37163 | 0.25704 | 0.506 | 0.46 | 1 | HC_vs_MS.NoTrt_B |
| PTCHD1    | 0.37179 | 0.43302 | 0.703 | 0.75 | 1 | HC_vs_MS.NoTrt_B |
| ZZEF1     | 0.37185 | 0.42423 | 0.501 | 0.55 | 1 | HC_vs_MS.NoTrt_B |
| ACVR2A    | 0.3719  | -0.354  | 0.225 | 0.26 | 1 | HC_vs_MS.NoTrt_B |
| PLEKHG5   | 0.37232 | 1.19664 | 0.165 | 0.14 | 1 | HC_vs_MS.NoTrt_B |
| ZNF763    | 0.37278 | 0.45313 | 0.172 | 0.15 | 1 | HC_vs_MS.NoTrt_B |
| MYOM3     | 0.37284 | 0.35634 | 0.561 | 0.57 | 1 | HC_vs_MS.NoTrt_B |
| PRKG2     | 0.37286 | 0.35198 | 0.391 | 0.46 | 1 | HC_vs_MS.NoTrt_B |
| ETFA      | 0.37286 | -0.3665 | 0.643 | 0.65 | 1 | HC_vs_MS.NoTrt_B |
| GTF2E1    | 0.37303 | -0.3923 | 0.254 | 0.22 | 1 | HC_vs_MS.NoTrt_B |
| TRANK1    | 0.37317 | 0.73642 | 0.246 | 0.22 | 1 | HC_vs_MS.NoTrt_B |
| ADAT1     | 0.37332 | -0.5966 | 0.671 | 0.74 | 1 | HC_vs_MS.NoTrt_B |
| CNDP1     | 0.37334 | 0.26778 | 0.577 | 0.58 | 1 | HC_vs_MS.NoTrt_B |
| BTBD8     | 0.37349 | 0.62094 | 0.293 | 0.27 | 1 | HC_vs_MS.NoTrt_B |
| ZNF569    | 0.37367 | 0.88799 | 0.183 | 0.22 | 1 | HC_vs_MS.NoTrt_B |
| EPHB4     | 0.37407 | 0.25578 | 0.79  | 0.89 | 1 | HC_vs_MS.NoTrt_B |
| NRBF2     | 0.37421 | 0.57669 | 0.086 | 0.11 | 1 | HC_vs_MS.NoTrt_B |
| TSC22D4   | 0.37436 | 0.3042  | 0.283 | 0.32 | 1 | HC_vs_MS.NoTrt_B |
| POU5F1B   | 0.37436 | 0.32071 | 0.352 | 0.34 | 1 | HC_vs_MS.NoTrt_B |
| WWP1      | 0.37439 | 0.27597 | 0.432 | 0.51 | 1 | HC_vs_MS.NoTrt_B |
| POU2F1    | 0.37471 | 0.4973  | 0.419 | 0.46 | 1 | HC_vs_MS.NoTrt_B |
| CBY1      | 0.37476 | 0.53191 | 0.188 | 0.16 | 1 | HC_vs_MS.NoTrt_B |
| UGT1A1    | 0.37513 | 0.34776 | 0.551 | 0.57 | 1 | HC_vs_MS.NoTrt_B |
| CEP350    | 0.37527 | 0.30033 | 0.323 | 0.37 | 1 | HC_vs_MS.NoTrt_B |
| KCNJ5     | 0.3753  | 0.27659 | 0.597 | 0.6  | 1 | HC_vs_MS.NoTrt_B |
| MAPK1     | 0.37575 | 0.50821 | 0.483 | 0.55 | 1 | HC_vs_MS.NoTrt_B |
| TAF2      | 0.37611 | 0.98154 | 0.43  | 0.42 | 1 | HC_vs_MS.NoTrt_B |
| POLL      | 0.37634 | -0.6397 | 0.404 | 0.42 | 1 | HC_vs_MS.NoTrt_B |



|            |         |         |       |      |   |                  |
|------------|---------|---------|-------|------|---|------------------|
| PYROXD1    | 0.3764  | 0.632   | 0.462 | 0.51 | 1 | HC_vs_MS.NoTrt_B |
| MFSD12     | 0.3769  | 1.06422 | 0.261 | 0.23 | 1 | HC_vs_MS.NoTrt_B |
| PNMA2      | 0.37771 | 0.32523 | 0.658 | 0.71 | 1 | HC_vs_MS.NoTrt_B |
| CLVS1      | 0.37795 | 0.26019 | 0.568 | 0.59 | 1 | HC_vs_MS.NoTrt_B |
| NCDN       | 0.37931 | 0.90054 | 0.216 | 0.19 | 1 | HC_vs_MS.NoTrt_B |
| ANKRD36    | 0.37934 | 0.442   | 0.714 | 0.66 | 1 | HC_vs_MS.NoTrt_B |
| TDRD3      | 0.38026 | -0.682  | 0.519 | 0.55 | 1 | HC_vs_MS.NoTrt_B |
| PLXNA4     | 0.3805  | 0.2629  | 0.083 | 0.1  | 1 | HC_vs_MS.NoTrt_B |
| DNAJC24    | 0.3814  | 0.33913 | 0.629 | 0.68 | 1 | HC_vs_MS.NoTrt_B |
| HIST1H2AG  | 0.38146 | 1.32028 | 0.278 | 0.34 | 1 | HC_vs_MS.NoTrt_B |
| SOS1       | 0.38157 | 0.76086 | 0.157 | 0.14 | 1 | HC_vs_MS.NoTrt_B |
| NECTIN4    | 0.38278 | -0.3061 | 0.178 | 0.21 | 1 | HC_vs_MS.NoTrt_B |
| PLCG1      | 0.38279 | 0.37357 | 0.364 | 0.42 | 1 | HC_vs_MS.NoTrt_B |
| KLHDC1     | 0.38305 | 0.46034 | 0.251 | 0.3  | 1 | HC_vs_MS.NoTrt_B |
| XKR8       | 0.38331 | 0.44256 | 0.17  | 0.14 | 1 | HC_vs_MS.NoTrt_B |
| ATMIN      | 0.38392 | 0.74245 | 0.287 | 0.27 | 1 | HC_vs_MS.NoTrt_B |
| ITGA10     | 0.38414 | 0.37196 | 0.449 | 0.54 | 1 | HC_vs_MS.NoTrt_B |
| WDR6       | 0.38425 | 0.32777 | 0.41  | 0.38 | 1 | HC_vs_MS.NoTrt_B |
| MTG2       | 0.38437 | 0.25777 | 0.775 | 0.78 | 1 | HC_vs_MS.NoTrt_B |
| EML5       | 0.38443 | 1.01818 | 0.223 | 0.25 | 1 | HC_vs_MS.NoTrt_B |
| LEMD2      | 0.38486 | 0.37812 | 0.09  | 0.11 | 1 | HC_vs_MS.NoTrt_B |
| ZNF418     | 0.38526 | 0.57834 | 0.172 | 0.15 | 1 | HC_vs_MS.NoTrt_B |
| SNRNP70    | 0.38536 | 0.71238 | 0.299 | 0.28 | 1 | HC_vs_MS.NoTrt_B |
| GTF2H2C.2  | 0.38539 | 0.32162 | 0.293 | 0.27 | 1 | HC_vs_MS.NoTrt_B |
| KDM6A      | 0.38576 | 0.5247  | 0.242 | 0.22 | 1 | HC_vs_MS.NoTrt_B |
| CYP3A5     | 0.38633 | 0.28186 | 0.89  | 0.95 | 1 | HC_vs_MS.NoTrt_B |
| RARS2      | 0.38644 | -0.277  | 0.586 | 0.62 | 1 | HC_vs_MS.NoTrt_B |
| SCRG1      | 0.38688 | 0.3172  | 0.714 | 0.74 | 1 | HC_vs_MS.NoTrt_B |
| ZNF551     | 0.38712 | 1.02567 | 0.513 | 0.6  | 1 | HC_vs_MS.NoTrt_B |
| DYNLT3     | 0.38759 | 0.34048 | 0.662 | 0.69 | 1 | HC_vs_MS.NoTrt_B |
| ZBTB44     | 0.38777 | 0.56978 | 0.309 | 0.28 | 1 | HC_vs_MS.NoTrt_B |
| AKT2       | 0.38836 | 0.43984 | 0.946 | 0.98 | 1 | HC_vs_MS.NoTrt_B |
| PPME1      | 0.38918 | -0.5211 | 0.116 | 0.14 | 1 | HC_vs_MS.NoTrt_B |
| CCDC50     | 0.38963 | 1.29292 | 0.443 | 0.42 | 1 | HC_vs_MS.NoTrt_B |
| RP11-506B6 | 0.38991 | 0.26993 | 0.364 | 0.35 | 1 | HC_vs_MS.NoTrt_B |
| KAT8       | 0.39023 | 0.41259 | 0.145 | 0.12 | 1 | HC_vs_MS.NoTrt_B |
| CEP83      | 0.391   | 0.3595  | 0.658 | 0.63 | 1 | HC_vs_MS.NoTrt_B |
| RUFY2      | 0.39178 | 0.50971 | 0.507 | 0.54 | 1 | HC_vs_MS.NoTrt_B |
| CARD14     | 0.39184 | 0.45355 | 0.762 | 0.8  | 1 | HC_vs_MS.NoTrt_B |
| TMEM242    | 0.39315 | 0.38076 | 0.117 | 0.1  | 1 | HC_vs_MS.NoTrt_B |

|          |         |         |       |      |   |                  |
|----------|---------|---------|-------|------|---|------------------|
| TMX3     | 0.39318 | 0.65614 | 0.417 | 0.41 | 1 | HC_vs_MS.NoTrt_B |
| VPS39    | 0.39374 | 0.45607 | 0.496 | 0.55 | 1 | HC_vs_MS.NoTrt_B |
| DDHD1    | 0.39387 | 0.42868 | 0.919 | 0.95 | 1 | HC_vs_MS.NoTrt_B |
| PQLC2    | 0.39461 | -0.9951 | 0.396 | 0.45 | 1 | HC_vs_MS.NoTrt_B |
| PAGR1    | 0.39464 | 0.6715  | 0.183 | 0.22 | 1 | HC_vs_MS.NoTrt_B |
| DHX33    | 0.39472 | -0.3185 | 0.317 | 0.36 | 1 | HC_vs_MS.NoTrt_B |
| EFCAB10  | 0.39524 | 0.27691 | 0.168 | 0.21 | 1 | HC_vs_MS.NoTrt_B |
| MYEF2    | 0.39528 | 0.35119 | 0.451 | 0.44 | 1 | HC_vs_MS.NoTrt_B |
| CAPN1    | 0.3953  | -0.4652 | 0.572 | 0.59 | 1 | HC_vs_MS.NoTrt_B |
| OSBP2    | 0.39554 | -1.0204 | 0.37  | 0.35 | 1 | HC_vs_MS.NoTrt_B |
| PIGN     | 0.39572 | 0.39642 | 0.586 | 0.6  | 1 | HC_vs_MS.NoTrt_B |
| BRCA1    | 0.39579 | 0.25925 | 0.813 | 0.83 | 1 | HC_vs_MS.NoTrt_B |
| MSI2     | 0.39597 | 0.7417  | 0.83  | 0.85 | 1 | HC_vs_MS.NoTrt_B |
| STX5     | 0.39604 | 0.25401 | 0.083 | 0.1  | 1 | HC_vs_MS.NoTrt_B |
| VSIG1    | 0.39605 | -0.2894 | 0.593 | 0.58 | 1 | HC_vs_MS.NoTrt_B |
| HGSNAT   | 0.39616 | -0.2985 | 0.67  | 0.67 | 1 | HC_vs_MS.NoTrt_B |
| SLC2A3   | 0.39622 | 0.30662 | 0.732 | 0.81 | 1 | HC_vs_MS.NoTrt_B |
| POU5F1   | 0.39625 | 0.36267 | 0.478 | 0.49 | 1 | HC_vs_MS.NoTrt_B |
| NUP188   | 0.39653 | 0.28383 | 0.526 | 0.52 | 1 | HC_vs_MS.NoTrt_B |
| PDE10A   | 0.39659 | 0.26214 | 0.3   | 0.33 | 1 | HC_vs_MS.NoTrt_B |
| NEB      | 0.39725 | 0.4719  | 0.532 | 0.62 | 1 | HC_vs_MS.NoTrt_B |
| IVNS1ABP | 0.39744 | 0.54617 | 0.33  | 0.3  | 1 | HC_vs_MS.NoTrt_B |
| CFAP70   | 0.39768 | -0.2925 | 0.22  | 0.2  | 1 | HC_vs_MS.NoTrt_B |
| TNFAIP8  | 0.39816 | 0.3485  | 0.864 | 0.88 | 1 | HC_vs_MS.NoTrt_B |
| LUC7L2   | 0.39852 | 0.62491 | 0.519 | 0.56 | 1 | HC_vs_MS.NoTrt_B |
| POMK     | 0.39872 | 0.52791 | 0.536 | 0.57 | 1 | HC_vs_MS.NoTrt_B |
| RNASE10  | 0.39884 | 0.27666 | 0.152 | 0.13 | 1 | HC_vs_MS.NoTrt_B |
| CDC40    | 0.39905 | 0.51509 | 0.532 | 0.57 | 1 | HC_vs_MS.NoTrt_B |
| ELOVL6   | 0.39944 | -1.1521 | 0.274 | 0.3  | 1 | HC_vs_MS.NoTrt_B |
| WDR93    | 0.39984 | 0.26019 | 0.412 | 0.41 | 1 | HC_vs_MS.NoTrt_B |
| QSOX2    | 0.40011 | -0.3734 | 0.158 | 0.18 | 1 | HC_vs_MS.NoTrt_B |
| KALRN    | 0.40014 | 0.57053 | 0.3   | 0.36 | 1 | HC_vs_MS.NoTrt_B |
| NIFK     | 0.40027 | -0.3269 | 0.522 | 0.57 | 1 | HC_vs_MS.NoTrt_B |
| LRCH4    | 0.40042 | 0.54431 | 0.5   | 0.51 | 1 | HC_vs_MS.NoTrt_B |
| ITIH1    | 0.40048 | 0.28874 | 0.172 | 0.16 | 1 | HC_vs_MS.NoTrt_B |
| TIMELESS | 0.40074 | -0.6666 | 0.301 | 0.27 | 1 | HC_vs_MS.NoTrt_B |
| NADK     | 0.40112 | 0.55338 | 0.287 | 0.27 | 1 | HC_vs_MS.NoTrt_B |
| NRP1     | 0.40123 | 0.40635 | 0.386 | 0.37 | 1 | HC_vs_MS.NoTrt_B |
| KLHL11   | 0.40127 | 0.3007  | 0.475 | 0.46 | 1 | HC_vs_MS.NoTrt_B |
| ADARB2   | 0.40279 | 0.43741 | 0.348 | 0.35 | 1 | HC_vs_MS.NoTrt_B |

|            |         |         |       |      |   |                  |
|------------|---------|---------|-------|------|---|------------------|
| UROS       | 0.40291 | -0.3275 | 0.457 | 0.49 | 1 | HC_vs_MS.NoTrt_B |
| MICA       | 0.40321 | 0.40099 | 0.716 | 0.82 | 1 | HC_vs_MS.NoTrt_B |
| ETV4       | 0.40355 | 0.46056 | 0.101 | 0.08 | 1 | HC_vs_MS.NoTrt_B |
| YWHAH      | 0.40364 | -0.3191 | 0.125 | 0.15 | 1 | HC_vs_MS.NoTrt_B |
| SCARB2     | 0.40369 | 0.66581 | 0.3   | 0.29 | 1 | HC_vs_MS.NoTrt_B |
| UBR2       | 0.40373 | 0.31834 | 0.538 | 0.58 | 1 | HC_vs_MS.NoTrt_B |
| TIAF1      | 0.40401 | -0.4579 | 0.536 | 0.49 | 1 | HC_vs_MS.NoTrt_B |
| PWWP2A     | 0.40433 | 0.67462 | 0.165 | 0.2  | 1 | HC_vs_MS.NoTrt_B |
| CSNK1G3    | 0.40497 | 0.40668 | 0.087 | 0.11 | 1 | HC_vs_MS.NoTrt_B |
| SH3BP2     | 0.40508 | 0.28373 | 0.771 | 0.77 | 1 | HC_vs_MS.NoTrt_B |
| C2orf88    | 0.40511 | 0.4242  | 0.345 | 0.32 | 1 | HC_vs_MS.NoTrt_B |
| WDR5B      | 0.40534 | 0.38182 | 0.183 | 0.22 | 1 | HC_vs_MS.NoTrt_B |
| UTS2B      | 0.40562 | 0.32182 | 0.23  | 0.27 | 1 | HC_vs_MS.NoTrt_B |
| ADARB1     | 0.40582 | 0.67587 | 0.197 | 0.17 | 1 | HC_vs_MS.NoTrt_B |
| TM9SF3     | 0.40712 | 0.62533 | 0.11  | 0.14 | 1 | HC_vs_MS.NoTrt_B |
| LACE1      | 0.40712 | -0.3106 | 0.542 | 0.6  | 1 | HC_vs_MS.NoTrt_B |
| BCO2       | 0.40721 | 0.36291 | 0.526 | 0.56 | 1 | HC_vs_MS.NoTrt_B |
| RNF14      | 0.40734 | -0.3533 | 0.603 | 0.63 | 1 | HC_vs_MS.NoTrt_B |
| ZBTB1      | 0.40759 | 0.43638 | 0.136 | 0.16 | 1 | HC_vs_MS.NoTrt_B |
| C16orf70   | 0.40769 | 0.27035 | 0.661 | 0.68 | 1 | HC_vs_MS.NoTrt_B |
| CASP3      | 0.40775 | 0.36924 | 0.12  | 0.15 | 1 | HC_vs_MS.NoTrt_B |
| CDKN2AIPNI | 0.40782 | -0.4    | 0.51  | 0.55 | 1 | HC_vs_MS.NoTrt_B |
| LUC7L3     | 0.40793 | 0.28685 | 0.604 | 0.72 | 1 | HC_vs_MS.NoTrt_B |
| NSUN6      | 0.40811 | 0.48053 | 0.675 | 0.69 | 1 | HC_vs_MS.NoTrt_B |
| USP10      | 0.40845 | 0.37765 | 0.243 | 0.28 | 1 | HC_vs_MS.NoTrt_B |
| FANCL      | 0.40861 | 0.25454 | 0.12  | 0.1  | 1 | HC_vs_MS.NoTrt_B |
| EGLN1      | 0.40897 | 0.79306 | 0.354 | 0.4  | 1 | HC_vs_MS.NoTrt_B |
| ABC13-4748 | 0.41007 | 0.42577 | 0.117 | 0.1  | 1 | HC_vs_MS.NoTrt_B |
| MYO7A      | 0.4103  | 0.45609 | 0.278 | 0.27 | 1 | HC_vs_MS.NoTrt_B |
| RINL       | 0.41057 | -0.4419 | 0.725 | 0.76 | 1 | HC_vs_MS.NoTrt_B |
| ZNF649     | 0.41079 | -0.3744 | 0.17  | 0.2  | 1 | HC_vs_MS.NoTrt_B |
| PCIF1      | 0.4121  | 0.31003 | 0.303 | 0.35 | 1 | HC_vs_MS.NoTrt_B |
| PEX11A     | 0.41215 | 0.44485 | 0.552 | 0.63 | 1 | HC_vs_MS.NoTrt_B |
| RRP15      | 0.41226 | 0.56121 | 0.567 | 0.57 | 1 | HC_vs_MS.NoTrt_B |
| LPCAT3     | 0.41269 | -0.2977 | 0.409 | 0.41 | 1 | HC_vs_MS.NoTrt_B |
| CCSAP      | 0.41286 | 0.8338  | 0.139 | 0.12 | 1 | HC_vs_MS.NoTrt_B |
| TRAF3      | 0.413   | 0.3809  | 0.342 | 0.38 | 1 | HC_vs_MS.NoTrt_B |
| AGAP6      | 0.41345 | 0.94777 | 0.101 | 0.12 | 1 | HC_vs_MS.NoTrt_B |
| BIRC6      | 0.41349 | 0.38172 | 0.422 | 0.48 | 1 | HC_vs_MS.NoTrt_B |
| DNAH17     | 0.41474 | 0.42838 | 0.309 | 0.28 | 1 | HC_vs_MS.NoTrt_B |

|             |         |         |       |      |   |                  |
|-------------|---------|---------|-------|------|---|------------------|
| PDZD8       | 0.41494 | 0.68056 | 0.249 | 0.22 | 1 | HC_vs_MS.NoTrt_B |
| WDR7        | 0.41494 | -0.3507 | 0.388 | 0.41 | 1 | HC_vs_MS.NoTrt_B |
| PANK3       | 0.41507 | 0.29945 | 0.429 | 0.4  | 1 | HC_vs_MS.NoTrt_B |
| RP11-345J4. | 0.41516 | 0.29847 | 0.757 | 0.75 | 1 | HC_vs_MS.NoTrt_B |
| SPTBN1      | 0.4156  | 0.28445 | 0.294 | 0.27 | 1 | HC_vs_MS.NoTrt_B |
| TLK2        | 0.4156  | 0.50678 | 0.371 | 0.35 | 1 | HC_vs_MS.NoTrt_B |
| FBXO15      | 0.41568 | 0.4532  | 0.604 | 0.58 | 1 | HC_vs_MS.NoTrt_B |
| POMGNT1     | 0.41572 | 0.50788 | 0.662 | 0.69 | 1 | HC_vs_MS.NoTrt_B |
| EDRF1       | 0.41572 | 0.41302 | 0.626 | 0.62 | 1 | HC_vs_MS.NoTrt_B |
| NUDT6       | 0.41622 | -0.3424 | 0.475 | 0.55 | 1 | HC_vs_MS.NoTrt_B |
| UBE2V2      | 0.4169  | 0.51967 | 0.722 | 0.72 | 1 | HC_vs_MS.NoTrt_B |
| FBXO11      | 0.41701 | 0.8664  | 0.441 | 0.49 | 1 | HC_vs_MS.NoTrt_B |
| NHLRC2      | 0.41718 | 0.65714 | 0.707 | 0.72 | 1 | HC_vs_MS.NoTrt_B |
| ZNF862      | 0.41785 | 0.46114 | 0.107 | 0.13 | 1 | HC_vs_MS.NoTrt_B |
| GGT1        | 0.418   | -0.4478 | 0.088 | 0.11 | 1 | HC_vs_MS.NoTrt_B |
| KLHL36      | 0.41831 | 0.68909 | 0.636 | 0.65 | 1 | HC_vs_MS.NoTrt_B |
| NEDD9       | 0.41861 | 0.35244 | 0.467 | 0.42 | 1 | HC_vs_MS.NoTrt_B |
| CC2D2B      | 0.41867 | 0.96456 | 0.125 | 0.11 | 1 | HC_vs_MS.NoTrt_B |
| MYLK        | 0.41869 | -0.9015 | 0.562 | 0.55 | 1 | HC_vs_MS.NoTrt_B |
| FMNL1       | 0.41869 | 0.44397 | 0.701 | 0.71 | 1 | HC_vs_MS.NoTrt_B |
| TMEM98      | 0.41903 | 0.25417 | 0.528 | 0.54 | 1 | HC_vs_MS.NoTrt_B |
| G6PC2       | 0.41925 | 0.26893 | 0.272 | 0.25 | 1 | HC_vs_MS.NoTrt_B |
| LSM10       | 0.41944 | 0.31591 | 0.119 | 0.1  | 1 | HC_vs_MS.NoTrt_B |
| ZNF81       | 0.41961 | 0.48735 | 0.29  | 0.27 | 1 | HC_vs_MS.NoTrt_B |
| ZHX3        | 0.41967 | 0.38105 | 0.401 | 0.4  | 1 | HC_vs_MS.NoTrt_B |
| MUC20       | 0.41992 | 0.97978 | 0.536 | 0.56 | 1 | HC_vs_MS.NoTrt_B |
| SLC24A1     | 0.42017 | 0.79319 | 0.468 | 0.45 | 1 | HC_vs_MS.NoTrt_B |
| ALG12       | 0.4204  | 0.51131 | 0.146 | 0.12 | 1 | HC_vs_MS.NoTrt_B |
| PTGR1       | 0.42053 | 0.25676 | 0.6   | 0.69 | 1 | HC_vs_MS.NoTrt_B |
| GMEB2       | 0.42083 | 0.33825 | 0.088 | 0.11 | 1 | HC_vs_MS.NoTrt_B |
| MSH6        | 0.42148 | 0.33971 | 0.865 | 0.86 | 1 | HC_vs_MS.NoTrt_B |
| C12orf29    | 0.42149 | -0.3271 | 0.199 | 0.22 | 1 | HC_vs_MS.NoTrt_B |
| CNTLN       | 0.42152 | 0.38466 | 0.328 | 0.31 | 1 | HC_vs_MS.NoTrt_B |
| SLC39A9     | 0.42187 | 0.62176 | 0.174 | 0.15 | 1 | HC_vs_MS.NoTrt_B |
| WAS         | 0.42195 | 0.72355 | 0.278 | 0.32 | 1 | HC_vs_MS.NoTrt_B |
| CPEB1       | 0.422   | -0.2773 | 0.146 | 0.12 | 1 | HC_vs_MS.NoTrt_B |
| TIGD5       | 0.42204 | 0.86206 | 0.199 | 0.17 | 1 | HC_vs_MS.NoTrt_B |
| MBNL1       | 0.42205 | 0.35659 | 0.859 | 0.91 | 1 | HC_vs_MS.NoTrt_B |
| ALG1        | 0.42232 | -0.2509 | 0.613 | 0.65 | 1 | HC_vs_MS.NoTrt_B |
| DENND6B     | 0.42252 | -0.3485 | 0.259 | 0.3  | 1 | HC_vs_MS.NoTrt_B |

|          |         |         |       |      |   |                  |
|----------|---------|---------|-------|------|---|------------------|
| RND1     | 0.42265 | 0.33581 | 0.551 | 0.56 | 1 | HC_vs_MS.NoTrt_B |
| PRKCB    | 0.42325 | 0.28048 | 0.291 | 0.32 | 1 | HC_vs_MS.NoTrt_B |
| PHACTR2  | 0.42354 | 0.31326 | 0.481 | 0.5  | 1 | HC_vs_MS.NoTrt_B |
| KLHL9    | 0.42363 | 0.31129 | 0.343 | 0.34 | 1 | HC_vs_MS.NoTrt_B |
| IL18BP   | 0.42371 | 0.70221 | 0.106 | 0.09 | 1 | HC_vs_MS.NoTrt_B |
| SLC25A36 | 0.42372 | 0.47406 | 0.129 | 0.15 | 1 | HC_vs_MS.NoTrt_B |
| TOR1AIP1 | 0.42387 | -0.343  | 0.53  | 0.49 | 1 | HC_vs_MS.NoTrt_B |
| ASRGL1   | 0.42401 | 0.38658 | 0.548 | 0.54 | 1 | HC_vs_MS.NoTrt_B |
| DMXL1    | 0.42482 | 0.58673 | 0.171 | 0.15 | 1 | HC_vs_MS.NoTrt_B |
| UMAD1    | 0.42495 | 0.4054  | 0.138 | 0.16 | 1 | HC_vs_MS.NoTrt_B |
| ZNF208   | 0.42531 | 0.47152 | 0.816 | 0.85 | 1 | HC_vs_MS.NoTrt_B |
| SIRPB1   | 0.42543 | 1.70955 | 0.216 | 0.21 | 1 | HC_vs_MS.NoTrt_B |
| EIF4G3   | 0.42556 | 0.90872 | 0.21  | 0.19 | 1 | HC_vs_MS.NoTrt_B |
| GTF3C6   | 0.42619 | 0.43661 | 0.151 | 0.13 | 1 | HC_vs_MS.NoTrt_B |
| ACTR3B   | 0.42656 | 0.58212 | 0.493 | 0.55 | 1 | HC_vs_MS.NoTrt_B |
| TBXAS1   | 0.42705 | -0.3638 | 0.371 | 0.42 | 1 | HC_vs_MS.NoTrt_B |
| EIF2B1   | 0.42723 | -0.3939 | 0.329 | 0.34 | 1 | HC_vs_MS.NoTrt_B |
| FAM208B  | 0.42781 | 0.36688 | 0.294 | 0.28 | 1 | HC_vs_MS.NoTrt_B |
| ZNF384   | 0.42901 | 0.54519 | 0.145 | 0.12 | 1 | HC_vs_MS.NoTrt_B |
| ERVK3-1  | 0.42902 | 0.32176 | 0.274 | 0.25 | 1 | HC_vs_MS.NoTrt_B |
| C5orf51  | 0.4291  | 0.2671  | 0.099 | 0.12 | 1 | HC_vs_MS.NoTrt_B |
| EXO1     | 0.42929 | -0.8971 | 0.164 | 0.2  | 1 | HC_vs_MS.NoTrt_B |
| PRR27    | 0.42946 | 0.26292 | 0.477 | 0.49 | 1 | HC_vs_MS.NoTrt_B |
| NLGN4Y   | 0.42953 | 0.39826 | 0.355 | 0.35 | 1 | HC_vs_MS.NoTrt_B |
| TAF3     | 0.4296  | 0.47467 | 0.151 | 0.13 | 1 | HC_vs_MS.NoTrt_B |
| PAFAH2   | 0.42998 | 0.38779 | 0.47  | 0.52 | 1 | HC_vs_MS.NoTrt_B |
| KDM3B    | 0.43019 | 0.54493 | 0.381 | 0.35 | 1 | HC_vs_MS.NoTrt_B |
| PBRM1    | 0.43065 | 0.43542 | 0.662 | 0.7  | 1 | HC_vs_MS.NoTrt_B |
| ZSCAN22  | 0.43069 | -0.8336 | 0.399 | 0.41 | 1 | HC_vs_MS.NoTrt_B |
| CD59     | 0.43116 | -0.2731 | 0.675 | 0.7  | 1 | HC_vs_MS.NoTrt_B |
| ESRRG    | 0.43118 | 0.26146 | 0.368 | 0.35 | 1 | HC_vs_MS.NoTrt_B |
| DDX43    | 0.43135 | 0.85005 | 0.168 | 0.15 | 1 | HC_vs_MS.NoTrt_B |
| ERI3     | 0.43172 | 0.52529 | 0.087 | 0.11 | 1 | HC_vs_MS.NoTrt_B |
| HS1BP3   | 0.43234 | -0.2575 | 0.154 | 0.18 | 1 | HC_vs_MS.NoTrt_B |
| ACADSB   | 0.43257 | 0.34595 | 0.628 | 0.72 | 1 | HC_vs_MS.NoTrt_B |
| EDA      | 0.43274 | 0.84701 | 0.33  | 0.37 | 1 | HC_vs_MS.NoTrt_B |
| ABCB8    | 0.43291 | -0.3843 | 0.533 | 0.5  | 1 | HC_vs_MS.NoTrt_B |
| GALNT10  | 0.43316 | -0.3413 | 0.53  | 0.57 | 1 | HC_vs_MS.NoTrt_B |
| NECAP1   | 0.43334 | 0.50227 | 0.436 | 0.41 | 1 | HC_vs_MS.NoTrt_B |
| DOT1L    | 0.43336 | 0.68016 | 0.729 | 0.77 | 1 | HC_vs_MS.NoTrt_B |

|           |         |         |       |      |   |                  |
|-----------|---------|---------|-------|------|---|------------------|
| PIP5K1B   | 0.43364 | 0.82816 | 0.116 | 0.1  | 1 | HC_vs_MS.NoTrt_B |
| HSH2D     | 0.43457 | -0.6167 | 0.601 | 0.63 | 1 | HC_vs_MS.NoTrt_B |
| ABHD15    | 0.43494 | 0.35639 | 0.329 | 0.37 | 1 | HC_vs_MS.NoTrt_B |
| CMC1      | 0.4354  | 0.81381 | 0.161 | 0.19 | 1 | HC_vs_MS.NoTrt_B |
| BCKDHA    | 0.43556 | -0.3114 | 0.175 | 0.2  | 1 | HC_vs_MS.NoTrt_B |
| EMSY      | 0.43564 | 0.41397 | 0.49  | 0.48 | 1 | HC_vs_MS.NoTrt_B |
| DALRD3    | 0.43617 | -0.3801 | 0.116 | 0.14 | 1 | HC_vs_MS.NoTrt_B |
| ATP6V1A   | 0.43646 | -0.3996 | 0.472 | 0.5  | 1 | HC_vs_MS.NoTrt_B |
| TUBB4A    | 0.43655 | -0.3186 | 0.19  | 0.17 | 1 | HC_vs_MS.NoTrt_B |
| ZKSCAN4   | 0.43663 | -0.2911 | 0.435 | 0.42 | 1 | HC_vs_MS.NoTrt_B |
| SMC1A     | 0.43664 | 0.65775 | 0.249 | 0.23 | 1 | HC_vs_MS.NoTrt_B |
| SLC25A23  | 0.43668 | 0.83951 | 0.507 | 0.52 | 1 | HC_vs_MS.NoTrt_B |
| ALDH3A2   | 0.43729 | -0.5874 | 0.262 | 0.29 | 1 | HC_vs_MS.NoTrt_B |
| BICDL1    | 0.4374  | 0.25604 | 0.581 | 0.57 | 1 | HC_vs_MS.NoTrt_B |
| TMEM52B   | 0.43783 | 0.44563 | 0.658 | 0.7  | 1 | HC_vs_MS.NoTrt_B |
| CHRNA6    | 0.43792 | -0.4292 | 0.425 | 0.5  | 1 | HC_vs_MS.NoTrt_B |
| FAM20B    | 0.43822 | -0.8039 | 0.565 | 0.62 | 1 | HC_vs_MS.NoTrt_B |
| ZFAND6    | 0.43879 | 0.3989  | 0.203 | 0.18 | 1 | HC_vs_MS.NoTrt_B |
| PKIB      | 0.43919 | 0.28454 | 0.7   | 0.74 | 1 | HC_vs_MS.NoTrt_B |
| HIST1H2BG | 0.43931 | 1.2591  | 0.472 | 0.47 | 1 | HC_vs_MS.NoTrt_B |
| LZTFL1    | 0.43952 | -0.3502 | 0.532 | 0.57 | 1 | HC_vs_MS.NoTrt_B |
| VDR       | 0.43969 | -0.5619 | 0.288 | 0.25 | 1 | HC_vs_MS.NoTrt_B |
| GRIPAP1   | 0.43978 | -0.2895 | 0.729 | 0.77 | 1 | HC_vs_MS.NoTrt_B |
| THADA     | 0.43982 | 0.40249 | 0.854 | 0.85 | 1 | HC_vs_MS.NoTrt_B |
| SLFN13    | 0.43993 | 0.45322 | 0.574 | 0.57 | 1 | HC_vs_MS.NoTrt_B |
| IL21R     | 0.44004 | 0.25062 | 0.523 | 0.57 | 1 | HC_vs_MS.NoTrt_B |
| ATP8B2    | 0.44039 | 0.25104 | 0.807 | 0.83 | 1 | HC_vs_MS.NoTrt_B |
| CCDC192   | 0.44062 | 0.3227  | 0.093 | 0.11 | 1 | HC_vs_MS.NoTrt_B |
| MAP3K4    | 0.4412  | 0.82391 | 0.183 | 0.16 | 1 | HC_vs_MS.NoTrt_B |
| PLIN3     | 0.44123 | -0.4675 | 0.519 | 0.48 | 1 | HC_vs_MS.NoTrt_B |
| NLE1      | 0.44156 | 1.12252 | 0.214 | 0.2  | 1 | HC_vs_MS.NoTrt_B |
| ACSBG1    | 0.44164 | 0.26348 | 0.361 | 0.35 | 1 | HC_vs_MS.NoTrt_B |
| NCAPD2    | 0.44208 | -0.325  | 0.403 | 0.44 | 1 | HC_vs_MS.NoTrt_B |
| DSC2      | 0.44247 | -1.0585 | 0.291 | 0.27 | 1 | HC_vs_MS.NoTrt_B |
| MED12     | 0.44254 | 0.31944 | 0.172 | 0.2  | 1 | HC_vs_MS.NoTrt_B |
| HELB      | 0.44264 | 0.37032 | 0.899 | 0.91 | 1 | HC_vs_MS.NoTrt_B |
| PCED1A    | 0.44303 | 0.27343 | 0.136 | 0.16 | 1 | HC_vs_MS.NoTrt_B |
| HMGA2     | 0.44311 | 0.25277 | 0.612 | 0.62 | 1 | HC_vs_MS.NoTrt_B |
| ZNF254    | 0.44328 | 0.61499 | 0.397 | 0.41 | 1 | HC_vs_MS.NoTrt_B |
| FSD1      | 0.44457 | 0.25422 | 0.39  | 0.38 | 1 | HC_vs_MS.NoTrt_B |

|          |         |         |       |      |   |                  |
|----------|---------|---------|-------|------|---|------------------|
| CLN6     | 0.44458 | 0.32776 | 0.759 | 0.82 | 1 | HC_vs_MS.NoTrt_B |
| NBPF12   | 0.44485 | 0.84204 | 0.312 | 0.35 | 1 | HC_vs_MS.NoTrt_B |
| ARL17A   | 0.44513 | 0.26192 | 0.691 | 0.75 | 1 | HC_vs_MS.NoTrt_B |
| INTS1    | 0.44543 | 0.527   | 0.413 | 0.37 | 1 | HC_vs_MS.NoTrt_B |
| FAM217B  | 0.44559 | 0.58982 | 0.352 | 0.35 | 1 | HC_vs_MS.NoTrt_B |
| NCLN     | 0.44588 | 0.36631 | 0.122 | 0.15 | 1 | HC_vs_MS.NoTrt_B |
| SETD2    | 0.44629 | 0.36037 | 0.342 | 0.37 | 1 | HC_vs_MS.NoTrt_B |
| PARVA    | 0.44635 | 0.343   | 0.719 | 0.72 | 1 | HC_vs_MS.NoTrt_B |
| ZNF644   | 0.44669 | 0.63618 | 0.194 | 0.17 | 1 | HC_vs_MS.NoTrt_B |
| IGF2BP3  | 0.44675 | 0.26493 | 0.545 | 0.55 | 1 | HC_vs_MS.NoTrt_B |
| NDUFS8   | 0.44689 | -0.2902 | 0.767 | 0.84 | 1 | HC_vs_MS.NoTrt_B |
| NUP85    | 0.44736 | 0.87072 | 0.475 | 0.49 | 1 | HC_vs_MS.NoTrt_B |
| SCLT1    | 0.44762 | 0.29656 | 0.614 | 0.63 | 1 | HC_vs_MS.NoTrt_B |
| ZNF706   | 0.44774 | 0.25308 | 0.372 | 0.42 | 1 | HC_vs_MS.NoTrt_B |
| APBB1    | 0.44786 | 0.34482 | 0.238 | 0.28 | 1 | HC_vs_MS.NoTrt_B |
| GALNT16  | 0.44798 | 0.56369 | 0.552 | 0.58 | 1 | HC_vs_MS.NoTrt_B |
| PCDHGA8  | 0.44818 | -0.3388 | 0.596 | 0.58 | 1 | HC_vs_MS.NoTrt_B |
| ANKRD17  | 0.44829 | 0.32785 | 0.251 | 0.28 | 1 | HC_vs_MS.NoTrt_B |
| EIF5A    | 0.44849 | 1.21909 | 0.577 | 0.67 | 1 | HC_vs_MS.NoTrt_B |
| NETO2    | 0.44858 | 0.42018 | 0.532 | 0.55 | 1 | HC_vs_MS.NoTrt_B |
| ACSL1    | 0.44898 | 0.36175 | 0.239 | 0.21 | 1 | HC_vs_MS.NoTrt_B |
| SYNE4    | 0.44928 | 0.60967 | 0.409 | 0.41 | 1 | HC_vs_MS.NoTrt_B |
| ENOX2    | 0.44938 | 0.58457 | 0.088 | 0.11 | 1 | HC_vs_MS.NoTrt_B |
| ORMDL2   | 0.44958 | 0.2741  | 0.452 | 0.49 | 1 | HC_vs_MS.NoTrt_B |
| MATK     | 0.44961 | 0.36755 | 0.559 | 0.61 | 1 | HC_vs_MS.NoTrt_B |
| PTAR1    | 0.44981 | 0.27509 | 0.168 | 0.2  | 1 | HC_vs_MS.NoTrt_B |
| C11orf24 | 0.44986 | 1.95302 | 0.246 | 0.23 | 1 | HC_vs_MS.NoTrt_B |
| GRHL1    | 0.45016 | 0.37721 | 0.484 | 0.49 | 1 | HC_vs_MS.NoTrt_B |
| MIS12    | 0.45017 | -0.4792 | 0.291 | 0.34 | 1 | HC_vs_MS.NoTrt_B |
| SNX3     | 0.45094 | 0.56773 | 0.158 | 0.14 | 1 | HC_vs_MS.NoTrt_B |
| FNIP1    | 0.45097 | 0.62115 | 0.575 | 0.55 | 1 | HC_vs_MS.NoTrt_B |
| ARHGEF10 | 0.45098 | 0.34669 | 0.607 | 0.58 | 1 | HC_vs_MS.NoTrt_B |
| RIT1     | 0.45107 | 0.26676 | 0.388 | 0.42 | 1 | HC_vs_MS.NoTrt_B |
| TNS1     | 0.4513  | 0.2931  | 0.245 | 0.23 | 1 | HC_vs_MS.NoTrt_B |
| ACTR6    | 0.45161 | -0.2664 | 0.513 | 0.54 | 1 | HC_vs_MS.NoTrt_B |
| KPNB1    | 0.4525  | 0.51037 | 0.697 | 0.69 | 1 | HC_vs_MS.NoTrt_B |
| BBX      | 0.45262 | 0.26628 | 0.325 | 0.37 | 1 | HC_vs_MS.NoTrt_B |
| MASP2    | 0.4529  | -0.2589 | 0.236 | 0.27 | 1 | HC_vs_MS.NoTrt_B |
| ZNF91    | 0.45328 | 0.71442 | 0.787 | 0.79 | 1 | HC_vs_MS.NoTrt_B |
| ANKRD27  | 0.45343 | 0.41729 | 0.193 | 0.22 | 1 | HC_vs_MS.NoTrt_B |

|            |         |         |       |      |   |                  |
|------------|---------|---------|-------|------|---|------------------|
| COL6A3     | 0.45351 | 0.28699 | 0.452 | 0.45 | 1 | HC_vs_MS.NoTrt_B |
| DCBLD1     | 0.45378 | 0.80916 | 0.504 | 0.52 | 1 | HC_vs_MS.NoTrt_B |
| GSK3A      | 0.45381 | 0.83017 | 0.328 | 0.32 | 1 | HC_vs_MS.NoTrt_B |
| GDI1       | 0.45417 | 0.69055 | 0.274 | 0.32 | 1 | HC_vs_MS.NoTrt_B |
| NR1H2      | 0.45443 | 0.30978 | 0.507 | 0.55 | 1 | HC_vs_MS.NoTrt_B |
| FAM210A    | 0.45471 | 0.69832 | 0.257 | 0.3  | 1 | HC_vs_MS.NoTrt_B |
| ZNF485     | 0.45477 | 0.58658 | 0.186 | 0.17 | 1 | HC_vs_MS.NoTrt_B |
| TRIM34     | 0.45509 | -0.5758 | 0.314 | 0.3  | 1 | HC_vs_MS.NoTrt_B |
| ERCC8      | 0.45587 | 0.35772 | 0.341 | 0.37 | 1 | HC_vs_MS.NoTrt_B |
| CBX6       | 0.45605 | 0.36072 | 0.455 | 0.53 | 1 | HC_vs_MS.NoTrt_B |
| MTHFD1L    | 0.45643 | 0.77747 | 0.125 | 0.11 | 1 | HC_vs_MS.NoTrt_B |
| TIPIN      | 0.45713 | 0.51341 | 0.562 | 0.59 | 1 | HC_vs_MS.NoTrt_B |
| SLAIN2     | 0.4574  | 0.2781  | 0.148 | 0.17 | 1 | HC_vs_MS.NoTrt_B |
| EXOC3      | 0.45744 | -0.354  | 0.214 | 0.24 | 1 | HC_vs_MS.NoTrt_B |
| CNOT6      | 0.45755 | 0.3358  | 0.09  | 0.11 | 1 | HC_vs_MS.NoTrt_B |
| TANGO6     | 0.45788 | 0.31097 | 0.797 | 0.85 | 1 | HC_vs_MS.NoTrt_B |
| ZNF2       | 0.45789 | 1.23586 | 0.316 | 0.36 | 1 | HC_vs_MS.NoTrt_B |
| GOPC       | 0.45812 | 0.90277 | 0.103 | 0.09 | 1 | HC_vs_MS.NoTrt_B |
| KTN1       | 0.45828 | 0.32264 | 0.571 | 0.67 | 1 | HC_vs_MS.NoTrt_B |
| SLC2A1     | 0.4595  | -0.2885 | 0.086 | 0.1  | 1 | HC_vs_MS.NoTrt_B |
| HDDC2      | 0.45958 | 0.4698  | 0.116 | 0.1  | 1 | HC_vs_MS.NoTrt_B |
| DGKZ       | 0.45977 | 0.45732 | 0.422 | 0.46 | 1 | HC_vs_MS.NoTrt_B |
| CCNT1      | 0.46013 | 0.50254 | 0.116 | 0.1  | 1 | HC_vs_MS.NoTrt_B |
| STK39      | 0.46046 | 0.42374 | 0.103 | 0.12 | 1 | HC_vs_MS.NoTrt_B |
| ZNF624     | 0.46118 | 0.47564 | 0.436 | 0.43 | 1 | HC_vs_MS.NoTrt_B |
| WDR89      | 0.46122 | 0.30037 | 0.362 | 0.41 | 1 | HC_vs_MS.NoTrt_B |
| UFC1       | 0.46179 | -0.2572 | 0.778 | 0.76 | 1 | HC_vs_MS.NoTrt_B |
| PNRC1      | 0.46227 | 0.82826 | 0.31  | 0.3  | 1 | HC_vs_MS.NoTrt_B |
| UBE3A      | 0.46274 | 0.59822 | 0.568 | 0.55 | 1 | HC_vs_MS.NoTrt_B |
| CYP3A4     | 0.46345 | 0.28952 | 0.157 | 0.14 | 1 | HC_vs_MS.NoTrt_B |
| DZIP3      | 0.46378 | 0.8417  | 0.257 | 0.24 | 1 | HC_vs_MS.NoTrt_B |
| CARF       | 0.464   | -0.5537 | 0.486 | 0.51 | 1 | HC_vs_MS.NoTrt_B |
| EIF2AK4    | 0.46405 | 0.29335 | 0.642 | 0.67 | 1 | HC_vs_MS.NoTrt_B |
| PRKCE      | 0.46406 | 0.63055 | 0.136 | 0.12 | 1 | HC_vs_MS.NoTrt_B |
| LTA4H      | 0.46408 | 0.4162  | 0.33  | 0.3  | 1 | HC_vs_MS.NoTrt_B |
| CLDN15     | 0.46455 | 0.47454 | 0.394 | 0.37 | 1 | HC_vs_MS.NoTrt_B |
| AK6        | 0.46527 | -0.259  | 0.184 | 0.21 | 1 | HC_vs_MS.NoTrt_B |
| ZNF44      | 0.46618 | -0.5002 | 0.535 | 0.52 | 1 | HC_vs_MS.NoTrt_B |
| ZNF461     | 0.46637 | -0.3746 | 0.664 | 0.64 | 1 | HC_vs_MS.NoTrt_B |
| FAM47E-STE | 0.46691 | 0.4321  | 0.174 | 0.21 | 1 | HC_vs_MS.NoTrt_B |



|          |         |         |       |      |   |                  |
|----------|---------|---------|-------|------|---|------------------|
| C22orf46 | 0.46814 | 0.41222 | 0.364 | 0.35 | 1 | HC_vs_MS.NoTrt_B |
| NEMF     | 0.46877 | 0.63174 | 0.777 | 0.8  | 1 | HC_vs_MS.NoTrt_B |
| RRM2B    | 0.46939 | 0.55336 | 0.117 | 0.14 | 1 | HC_vs_MS.NoTrt_B |
| PPP4C    | 0.46942 | 0.25749 | 0.455 | 0.42 | 1 | HC_vs_MS.NoTrt_B |
| ZNF548   | 0.46961 | 0.46024 | 0.638 | 0.67 | 1 | HC_vs_MS.NoTrt_B |
| ZFHX3    | 0.46978 | 1.1166  | 0.143 | 0.12 | 1 | HC_vs_MS.NoTrt_B |
| RIPK2    | 0.47013 | 0.52264 | 0.161 | 0.18 | 1 | HC_vs_MS.NoTrt_B |
| BRD2     | 0.47044 | 0.34273 | 0.546 | 0.6  | 1 | HC_vs_MS.NoTrt_B |
| KCNV1    | 0.4724  | 0.27507 | 0.581 | 0.6  | 1 | HC_vs_MS.NoTrt_B |
| PRH1     | 0.47247 | 0.25697 | 0.086 | 0.1  | 1 | HC_vs_MS.NoTrt_B |
| ATR      | 0.47273 | 0.3771  | 0.468 | 0.52 | 1 | HC_vs_MS.NoTrt_B |
| RRP8     | 0.47277 | 0.56595 | 0.486 | 0.47 | 1 | HC_vs_MS.NoTrt_B |
| GBA      | 0.47285 | -0.8293 | 0.458 | 0.5  | 1 | HC_vs_MS.NoTrt_B |
| ST7L     | 0.473   | 0.27679 | 0.468 | 0.47 | 1 | HC_vs_MS.NoTrt_B |
| FAM71D   | 0.47313 | 0.31731 | 0.12  | 0.1  | 1 | HC_vs_MS.NoTrt_B |
| NPIP9    | 0.47314 | 0.51336 | 0.114 | 0.1  | 1 | HC_vs_MS.NoTrt_B |
| CXorf57  | 0.47328 | -0.4623 | 0.11  | 0.09 | 1 | HC_vs_MS.NoTrt_B |
| VPS25    | 0.47328 | -0.3821 | 0.255 | 0.28 | 1 | HC_vs_MS.NoTrt_B |
| PRKCD    | 0.47365 | 0.52606 | 0.477 | 0.48 | 1 | HC_vs_MS.NoTrt_B |
| FRMPD2   | 0.4738  | 0.32859 | 0.13  | 0.11 | 1 | HC_vs_MS.NoTrt_B |
| RBM20    | 0.47397 | 0.32569 | 0.438 | 0.42 | 1 | HC_vs_MS.NoTrt_B |
| MAP2K6   | 0.47434 | 1.15654 | 0.333 | 0.32 | 1 | HC_vs_MS.NoTrt_B |
| WDR17    | 0.4745  | 0.30338 | 0.716 | 0.76 | 1 | HC_vs_MS.NoTrt_B |
| OTUD3    | 0.47491 | 1.45506 | 0.5   | 0.49 | 1 | HC_vs_MS.NoTrt_B |
| TP53I13  | 0.47512 | 0.77309 | 0.116 | 0.14 | 1 | HC_vs_MS.NoTrt_B |
| PPA1     | 0.47546 | -0.3828 | 0.797 | 0.84 | 1 | HC_vs_MS.NoTrt_B |
| COQ3     | 0.47562 | -0.2523 | 0.23  | 0.26 | 1 | HC_vs_MS.NoTrt_B |
| FKBP4    | 0.47638 | -0.7941 | 0.094 | 0.11 | 1 | HC_vs_MS.NoTrt_B |
| RUVBL2   | 0.4769  | -0.6884 | 0.854 | 0.92 | 1 | HC_vs_MS.NoTrt_B |
| MCMBP    | 0.47708 | 1.24821 | 0.423 | 0.41 | 1 | HC_vs_MS.NoTrt_B |
| SSRP1    | 0.47714 | 0.59417 | 0.113 | 0.14 | 1 | HC_vs_MS.NoTrt_B |
| ZNF250   | 0.47717 | -0.2568 | 0.552 | 0.6  | 1 | HC_vs_MS.NoTrt_B |
| TMEM184C | 0.47788 | 0.64508 | 0.533 | 0.58 | 1 | HC_vs_MS.NoTrt_B |
| SLC46A1  | 0.47798 | 0.39762 | 0.484 | 0.45 | 1 | HC_vs_MS.NoTrt_B |
| SFT2D3   | 0.47799 | 0.41847 | 0.419 | 0.47 | 1 | HC_vs_MS.NoTrt_B |
| INTS2    | 0.47874 | 0.66745 | 0.235 | 0.22 | 1 | HC_vs_MS.NoTrt_B |
| BMF      | 0.47907 | 0.25283 | 0.139 | 0.12 | 1 | HC_vs_MS.NoTrt_B |
| C6orf163 | 0.4792  | 0.43453 | 0.452 | 0.49 | 1 | HC_vs_MS.NoTrt_B |
| PARP14   | 0.47986 | 0.56981 | 0.409 | 0.39 | 1 | HC_vs_MS.NoTrt_B |
| RBM45    | 0.47986 | 0.40039 | 0.086 | 0.1  | 1 | HC_vs_MS.NoTrt_B |

|         |         |         |       |      |   |                  |
|---------|---------|---------|-------|------|---|------------------|
| MYO9B   | 0.48006 | 0.53927 | 0.22  | 0.26 | 1 | HC_vs_MS.NoTrt_B |
| CHTOP   | 0.4801  | 0.62069 | 0.593 | 0.59 | 1 | HC_vs_MS.NoTrt_B |
| ZNF549  | 0.48026 | 1.24669 | 0.688 | 0.7  | 1 | HC_vs_MS.NoTrt_B |
| AKAP11  | 0.48028 | 0.53535 | 0.226 | 0.21 | 1 | HC_vs_MS.NoTrt_B |
| IFNLR1  | 0.48037 | 0.26085 | 0.109 | 0.13 | 1 | HC_vs_MS.NoTrt_B |
| TEKT2   | 0.48055 | 0.46229 | 0.117 | 0.14 | 1 | HC_vs_MS.NoTrt_B |
| UBXN8   | 0.48107 | 0.67516 | 0.177 | 0.21 | 1 | HC_vs_MS.NoTrt_B |
| SLC41A1 | 0.48138 | 0.48906 | 0.103 | 0.09 | 1 | HC_vs_MS.NoTrt_B |
| SLC18A1 | 0.4825  | 0.26881 | 0.143 | 0.17 | 1 | HC_vs_MS.NoTrt_B |
| CTNND1  | 0.48255 | 0.52487 | 0.304 | 0.3  | 1 | HC_vs_MS.NoTrt_B |
| RFC5    | 0.48311 | -0.5294 | 0.119 | 0.14 | 1 | HC_vs_MS.NoTrt_B |
| EME2    | 0.48318 | 0.95579 | 0.286 | 0.32 | 1 | HC_vs_MS.NoTrt_B |
| MLLT10  | 0.48325 | 0.69222 | 0.3   | 0.33 | 1 | HC_vs_MS.NoTrt_B |
| SMIM15  | 0.48326 | 0.82883 | 0.088 | 0.11 | 1 | HC_vs_MS.NoTrt_B |
| SYNC    | 0.48405 | 0.78115 | 0.123 | 0.15 | 1 | HC_vs_MS.NoTrt_B |
| DENND4B | 0.48415 | 0.38123 | 0.207 | 0.24 | 1 | HC_vs_MS.NoTrt_B |
| MRPS27  | 0.48433 | -0.6554 | 0.514 | 0.51 | 1 | HC_vs_MS.NoTrt_B |
| CHP2    | 0.48451 | 0.32382 | 0.407 | 0.41 | 1 | HC_vs_MS.NoTrt_B |
| PPID    | 0.48456 | -0.2994 | 0.352 | 0.37 | 1 | HC_vs_MS.NoTrt_B |
| FADS2   | 0.48495 | 0.46751 | 0.486 | 0.54 | 1 | HC_vs_MS.NoTrt_B |
| MOCS2   | 0.48517 | 0.58865 | 0.084 | 0.1  | 1 | HC_vs_MS.NoTrt_B |
| U2AF2   | 0.48567 | 0.32536 | 0.186 | 0.17 | 1 | HC_vs_MS.NoTrt_B |
| SIDT2   | 0.48589 | 0.50346 | 0.751 | 0.79 | 1 | HC_vs_MS.NoTrt_B |
| RAB4B   | 0.48665 | 0.28116 | 0.377 | 0.35 | 1 | HC_vs_MS.NoTrt_B |
| REV3L   | 0.48702 | 0.38727 | 0.675 | 0.72 | 1 | HC_vs_MS.NoTrt_B |
| FSBP    | 0.48713 | 0.87182 | 0.314 | 0.36 | 1 | HC_vs_MS.NoTrt_B |
| ELAC1   | 0.48717 | 0.29548 | 0.439 | 0.44 | 1 | HC_vs_MS.NoTrt_B |
| SLC30A8 | 0.48721 | 0.29605 | 0.401 | 0.38 | 1 | HC_vs_MS.NoTrt_B |
| XPOT    | 0.48748 | 0.39241 | 0.432 | 0.41 | 1 | HC_vs_MS.NoTrt_B |
| HYKK    | 0.48762 | 0.41152 | 0.813 | 0.86 | 1 | HC_vs_MS.NoTrt_B |
| GOLPH3L | 0.48783 | 0.44043 | 0.21  | 0.24 | 1 | HC_vs_MS.NoTrt_B |
| TONSL   | 0.48813 | 0.78766 | 0.597 | 0.62 | 1 | HC_vs_MS.NoTrt_B |
| CASC3   | 0.48829 | 0.32466 | 0.533 | 0.52 | 1 | HC_vs_MS.NoTrt_B |
| ATP13A1 | 0.48858 | 0.65139 | 0.322 | 0.3  | 1 | HC_vs_MS.NoTrt_B |
| FAM214A | 0.48874 | 0.62962 | 0.193 | 0.22 | 1 | HC_vs_MS.NoTrt_B |
| AMDHD1  | 0.48966 | 0.55997 | 0.196 | 0.17 | 1 | HC_vs_MS.NoTrt_B |
| CC2D2A  | 0.4897  | 0.28028 | 0.241 | 0.27 | 1 | HC_vs_MS.NoTrt_B |
| OPRD1   | 0.48984 | 0.29233 | 0.746 | 0.82 | 1 | HC_vs_MS.NoTrt_B |
| AASS    | 0.49002 | 0.25455 | 0.312 | 0.29 | 1 | HC_vs_MS.NoTrt_B |
| PIGBOS1 | 0.49015 | -0.4166 | 0.558 | 0.62 | 1 | HC_vs_MS.NoTrt_B |

|            |         |         |       |      |   |                  |
|------------|---------|---------|-------|------|---|------------------|
| TTF1       | 0.49025 | -0.4172 | 0.396 | 0.42 | 1 | HC_vs_MS.NoTrt_B |
| ZNF781     | 0.49059 | 0.83047 | 0.291 | 0.27 | 1 | HC_vs_MS.NoTrt_B |
| CSNK1D     | 0.49087 | 0.30102 | 0.936 | 0.96 | 1 | HC_vs_MS.NoTrt_B |
| BCAT1      | 0.49104 | -0.6079 | 0.446 | 0.45 | 1 | HC_vs_MS.NoTrt_B |
| TK2        | 0.49106 | 0.27005 | 0.126 | 0.15 | 1 | HC_vs_MS.NoTrt_B |
| MYADM      | 0.49152 | 0.31517 | 0.728 | 0.77 | 1 | HC_vs_MS.NoTrt_B |
| DDX25      | 0.49242 | 0.30228 | 0.654 | 0.65 | 1 | HC_vs_MS.NoTrt_B |
| ENO3       | 0.49278 | 0.28193 | 0.467 | 0.47 | 1 | HC_vs_MS.NoTrt_B |
| CPSF4      | 0.49331 | 0.55898 | 0.357 | 0.36 | 1 | HC_vs_MS.NoTrt_B |
| AP4E1      | 0.49399 | 0.45485 | 0.397 | 0.38 | 1 | HC_vs_MS.NoTrt_B |
| TRAF5      | 0.49403 | 0.40505 | 0.716 | 0.72 | 1 | HC_vs_MS.NoTrt_B |
| NCALD      | 0.49446 | 0.38033 | 0.699 | 0.73 | 1 | HC_vs_MS.NoTrt_B |
| GNE        | 0.4948  | 0.86828 | 0.193 | 0.17 | 1 | HC_vs_MS.NoTrt_B |
| RNFT1      | 0.49531 | 0.39065 | 0.401 | 0.45 | 1 | HC_vs_MS.NoTrt_B |
| SIMC1      | 0.49627 | 0.52898 | 0.42  | 0.48 | 1 | HC_vs_MS.NoTrt_B |
| LCP2       | 0.49651 | 0.34007 | 0.719 | 0.77 | 1 | HC_vs_MS.NoTrt_B |
| ARL14EP    | 0.49655 | -0.6574 | 0.203 | 0.22 | 1 | HC_vs_MS.NoTrt_B |
| LPCAT4     | 0.4966  | 0.39267 | 0.262 | 0.3  | 1 | HC_vs_MS.NoTrt_B |
| ZSCAN20    | 0.49715 | 0.78366 | 0.238 | 0.22 | 1 | HC_vs_MS.NoTrt_B |
| USF3       | 0.4975  | 0.30325 | 0.699 | 0.74 | 1 | HC_vs_MS.NoTrt_B |
| CAMK4      | 0.4978  | 0.36131 | 0.648 | 0.7  | 1 | HC_vs_MS.NoTrt_B |
| CHIC2      | 0.49784 | 0.51312 | 0.171 | 0.2  | 1 | HC_vs_MS.NoTrt_B |
| SEMA3B     | 0.49893 | 0.55083 | 0.226 | 0.26 | 1 | HC_vs_MS.NoTrt_B |
| KIAA1143   | 0.49933 | 0.29706 | 0.491 | 0.47 | 1 | HC_vs_MS.NoTrt_B |
| SLC16A10   | 0.49937 | 0.30939 | 0.823 | 0.81 | 1 | HC_vs_MS.NoTrt_B |
| MRPS23     | 0.4994  | -0.4629 | 0.78  | 0.82 | 1 | HC_vs_MS.NoTrt_B |
| HSD3B7     | 0.49953 | 0.67077 | 0.432 | 0.44 | 1 | HC_vs_MS.NoTrt_B |
| PTOV1      | 0.49976 | 0.91716 | 0.133 | 0.12 | 1 | HC_vs_MS.NoTrt_B |
| UNKL       | 0.50005 | 0.58301 | 0.43  | 0.4  | 1 | HC_vs_MS.NoTrt_B |
| ZNF181     | 0.50006 | 0.57083 | 0.157 | 0.18 | 1 | HC_vs_MS.NoTrt_B |
| CFP        | 0.5002  | -0.613  | 0.357 | 0.41 | 1 | HC_vs_MS.NoTrt_B |
| C9orf3     | 0.5004  | -0.4882 | 0.704 | 0.73 | 1 | HC_vs_MS.NoTrt_B |
| CADM1      | 0.50044 | 1.38883 | 0.19  | 0.17 | 1 | HC_vs_MS.NoTrt_B |
| DYRK1A     | 0.50132 | 0.35739 | 0.681 | 0.68 | 1 | HC_vs_MS.NoTrt_B |
| GNA13      | 0.50147 | 0.74213 | 0.132 | 0.16 | 1 | HC_vs_MS.NoTrt_B |
| MRPS15     | 0.50194 | -0.5048 | 0.49  | 0.44 | 1 | HC_vs_MS.NoTrt_B |
| RP11-231C1 | 0.50321 | 0.34804 | 0.655 | 0.69 | 1 | HC_vs_MS.NoTrt_B |
| RASGRP2    | 0.5035  | 0.43987 | 0.384 | 0.43 | 1 | HC_vs_MS.NoTrt_B |
| JUNB       | 0.50423 | 0.87297 | 0.354 | 0.38 | 1 | HC_vs_MS.NoTrt_B |
| ZBED5      | 0.50508 | 0.28    | 0.678 | 0.7  | 1 | HC_vs_MS.NoTrt_B |

|         |         |         |       |      |   |                  |
|---------|---------|---------|-------|------|---|------------------|
| CADPS   | 0.50522 | 0.34992 | 0.33  | 0.32 | 1 | HC_vs_MS.NoTrt_B |
| MRFAP1  | 0.50559 | -0.2553 | 0.268 | 0.29 | 1 | HC_vs_MS.NoTrt_B |
| GALNT6  | 0.5058  | 0.7158  | 0.655 | 0.71 | 1 | HC_vs_MS.NoTrt_B |
| MFGE8   | 0.50623 | 0.51979 | 0.504 | 0.54 | 1 | HC_vs_MS.NoTrt_B |
| TGDS    | 0.50663 | 0.62304 | 0.107 | 0.09 | 1 | HC_vs_MS.NoTrt_B |
| F2RL1   | 0.50687 | 0.96207 | 0.191 | 0.17 | 1 | HC_vs_MS.NoTrt_B |
| ZNF836  | 0.50689 | 0.42013 | 0.161 | 0.18 | 1 | HC_vs_MS.NoTrt_B |
| OPA1    | 0.50702 | 0.31682 | 0.122 | 0.14 | 1 | HC_vs_MS.NoTrt_B |
| DNAJC3  | 0.50714 | 0.29335 | 0.458 | 0.5  | 1 | HC_vs_MS.NoTrt_B |
| NLRP2   | 0.50735 | 0.38675 | 0.794 | 0.81 | 1 | HC_vs_MS.NoTrt_B |
| TAPT1   | 0.50773 | 0.58308 | 0.684 | 0.7  | 1 | HC_vs_MS.NoTrt_B |
| CDK12   | 0.50774 | 0.29226 | 0.512 | 0.56 | 1 | HC_vs_MS.NoTrt_B |
| NOL4L   | 0.50824 | 0.38818 | 0.597 | 0.69 | 1 | HC_vs_MS.NoTrt_B |
| RBM18   | 0.50829 | 0.39523 | 0.312 | 0.29 | 1 | HC_vs_MS.NoTrt_B |
| RNF212  | 0.50829 | 0.26263 | 0.572 | 0.58 | 1 | HC_vs_MS.NoTrt_B |
| SF1     | 0.5089  | 0.44556 | 0.512 | 0.63 | 1 | HC_vs_MS.NoTrt_B |
| RAB2B   | 0.509   | 0.38627 | 0.652 | 0.65 | 1 | HC_vs_MS.NoTrt_B |
| SLC41A3 | 0.50909 | -0.6546 | 0.286 | 0.31 | 1 | HC_vs_MS.NoTrt_B |
| ZNF84   | 0.50917 | 0.62915 | 0.284 | 0.26 | 1 | HC_vs_MS.NoTrt_B |
| ZNF530  | 0.50953 | 0.7984  | 0.483 | 0.45 | 1 | HC_vs_MS.NoTrt_B |
| PIK3C2A | 0.50979 | 1.19235 | 0.386 | 0.37 | 1 | HC_vs_MS.NoTrt_B |
| KCNMB4  | 0.51048 | 0.4031  | 0.293 | 0.33 | 1 | HC_vs_MS.NoTrt_B |
| CCDC124 | 0.51107 | 0.33935 | 0.486 | 0.49 | 1 | HC_vs_MS.NoTrt_B |
| LNPEP   | 0.51167 | 0.30968 | 0.583 | 0.65 | 1 | HC_vs_MS.NoTrt_B |
| SIN3A   | 0.51174 | 0.36179 | 0.783 | 0.78 | 1 | HC_vs_MS.NoTrt_B |
| FANCA   | 0.51179 | -0.4688 | 0.259 | 0.28 | 1 | HC_vs_MS.NoTrt_B |
| XPO1    | 0.51197 | 0.25944 | 0.916 | 0.93 | 1 | HC_vs_MS.NoTrt_B |
| CDC5L   | 0.51199 | 0.47795 | 0.59  | 0.6  | 1 | HC_vs_MS.NoTrt_B |
| HAUS7   | 0.51202 | 0.33532 | 0.091 | 0.11 | 1 | HC_vs_MS.NoTrt_B |
| NPAT    | 0.51242 | 0.56137 | 0.71  | 0.79 | 1 | HC_vs_MS.NoTrt_B |
| MCUR1   | 0.51258 | 0.531   | 0.786 | 0.82 | 1 | HC_vs_MS.NoTrt_B |
| ZNF835  | 0.51266 | 0.29381 | 0.558 | 0.57 | 1 | HC_vs_MS.NoTrt_B |
| ZC3HC1  | 0.51299 | -0.4696 | 0.458 | 0.5  | 1 | HC_vs_MS.NoTrt_B |
| KCTD13  | 0.51317 | 0.83539 | 0.135 | 0.12 | 1 | HC_vs_MS.NoTrt_B |
| EPS8    | 0.51318 | -0.4496 | 0.391 | 0.38 | 1 | HC_vs_MS.NoTrt_B |
| DTD1    | 0.51368 | 0.26153 | 0.307 | 0.28 | 1 | HC_vs_MS.NoTrt_B |
| PIGP    | 0.5137  | 0.27031 | 0.775 | 0.82 | 1 | HC_vs_MS.NoTrt_B |
| RBM38   | 0.51377 | 0.3866  | 0.125 | 0.15 | 1 | HC_vs_MS.NoTrt_B |
| TTN     | 0.5138  | 0.51849 | 0.628 | 0.69 | 1 | HC_vs_MS.NoTrt_B |
| TTC21B  | 0.51427 | 0.37916 | 0.359 | 0.35 | 1 | HC_vs_MS.NoTrt_B |

|            |         |         |       |      |   |                  |
|------------|---------|---------|-------|------|---|------------------|
| ANO8       | 0.51429 | 0.64309 | 0.133 | 0.12 | 1 | HC_vs_MS.NoTrt_B |
| XRCC1      | 0.51458 | -0.3572 | 0.161 | 0.18 | 1 | HC_vs_MS.NoTrt_B |
| PADI2      | 0.51467 | 0.44736 | 0.217 | 0.2  | 1 | HC_vs_MS.NoTrt_B |
| ESF1       | 0.51474 | 0.78616 | 0.136 | 0.12 | 1 | HC_vs_MS.NoTrt_B |
| CCDC152    | 0.51492 | 0.52492 | 0.197 | 0.23 | 1 | HC_vs_MS.NoTrt_B |
| SPC24      | 0.51504 | -0.2884 | 0.859 | 0.82 | 1 | HC_vs_MS.NoTrt_B |
| PRRC1      | 0.51524 | 0.35042 | 0.352 | 0.38 | 1 | HC_vs_MS.NoTrt_B |
| SNCAIP     | 0.51563 | 0.31371 | 0.384 | 0.4  | 1 | HC_vs_MS.NoTrt_B |
| DIABLO     | 0.51578 | -0.3673 | 0.674 | 0.72 | 1 | HC_vs_MS.NoTrt_B |
| SEC31B     | 0.51626 | 0.34579 | 0.446 | 0.47 | 1 | HC_vs_MS.NoTrt_B |
| C3orf49    | 0.51633 | 0.36536 | 0.31  | 0.3  | 1 | HC_vs_MS.NoTrt_B |
| RAB39A     | 0.5165  | 0.28222 | 0.349 | 0.36 | 1 | HC_vs_MS.NoTrt_B |
| ZNF69      | 0.51658 | -0.3653 | 0.452 | 0.43 | 1 | HC_vs_MS.NoTrt_B |
| ARHGAP27   | 0.51664 | 0.35887 | 0.526 | 0.59 | 1 | HC_vs_MS.NoTrt_B |
| FAM69A     | 0.51667 | 0.62342 | 0.106 | 0.12 | 1 | HC_vs_MS.NoTrt_B |
| PKHD1L1    | 0.51676 | 0.38679 | 0.446 | 0.47 | 1 | HC_vs_MS.NoTrt_B |
| RGS1       | 0.5169  | 0.54309 | 0.129 | 0.11 | 1 | HC_vs_MS.NoTrt_B |
| ADGB       | 0.51738 | 0.27261 | 0.158 | 0.15 | 1 | HC_vs_MS.NoTrt_B |
| CDC6       | 0.51756 | 0.28593 | 0.27  | 0.25 | 1 | HC_vs_MS.NoTrt_B |
| MRPL49     | 0.51766 | -0.3354 | 0.455 | 0.46 | 1 | HC_vs_MS.NoTrt_B |
| NUDT14     | 0.5179  | 0.54537 | 0.438 | 0.48 | 1 | HC_vs_MS.NoTrt_B |
| ITGAE      | 0.51796 | 0.40903 | 0.574 | 0.6  | 1 | HC_vs_MS.NoTrt_B |
| CC2D1A     | 0.51896 | 0.34402 | 0.681 | 0.74 | 1 | HC_vs_MS.NoTrt_B |
| PROX2      | 0.51932 | 0.346   | 0.123 | 0.11 | 1 | HC_vs_MS.NoTrt_B |
| PSMG1      | 0.51948 | 0.39145 | 0.126 | 0.15 | 1 | HC_vs_MS.NoTrt_B |
| RP11-526A4 | 0.52104 | 0.2725  | 0.338 | 0.34 | 1 | HC_vs_MS.NoTrt_B |
| CDC14A     | 0.52171 | 0.51193 | 0.229 | 0.26 | 1 | HC_vs_MS.NoTrt_B |
| NAV3       | 0.52188 | 0.30157 | 0.704 | 0.75 | 1 | HC_vs_MS.NoTrt_B |
| PAQR7      | 0.52204 | 0.46365 | 0.486 | 0.49 | 1 | HC_vs_MS.NoTrt_B |
| RPS17      | 0.52206 | 0.2637  | 0.394 | 0.42 | 1 | HC_vs_MS.NoTrt_B |
| LRR37A     | 0.5222  | 0.69015 | 0.399 | 0.44 | 1 | HC_vs_MS.NoTrt_B |
| LGALS9     | 0.52239 | 0.63541 | 0.299 | 0.29 | 1 | HC_vs_MS.NoTrt_B |
| KDM5C      | 0.52377 | 0.83974 | 0.37  | 0.42 | 1 | HC_vs_MS.NoTrt_B |
| SELM       | 0.52409 | 0.28497 | 0.259 | 0.29 | 1 | HC_vs_MS.NoTrt_B |
| PTPRS      | 0.52448 | 0.25887 | 0.509 | 0.57 | 1 | HC_vs_MS.NoTrt_B |
| ZNF140     | 0.52615 | -0.4394 | 0.149 | 0.17 | 1 | HC_vs_MS.NoTrt_B |
| ITPKB      | 0.52618 | 0.58724 | 0.562 | 0.59 | 1 | HC_vs_MS.NoTrt_B |
| MAP3K11    | 0.52625 | 0.87721 | 0.612 | 0.64 | 1 | HC_vs_MS.NoTrt_B |
| WDFY2      | 0.52643 | -0.3337 | 0.558 | 0.58 | 1 | HC_vs_MS.NoTrt_B |
| WDR77      | 0.52648 | 0.29676 | 0.106 | 0.12 | 1 | HC_vs_MS.NoTrt_B |

|            |         |         |       |      |   |                  |
|------------|---------|---------|-------|------|---|------------------|
| HENMT1     | 0.52688 | -0.4032 | 0.332 | 0.36 | 1 | HC_vs_MS.NoTrt_B |
| PITPNM1    | 0.52718 | 0.5369  | 0.246 | 0.23 | 1 | HC_vs_MS.NoTrt_B |
| SLC30A7    | 0.52723 | 0.28614 | 0.599 | 0.64 | 1 | HC_vs_MS.NoTrt_B |
| MTFR1      | 0.52743 | 0.57791 | 0.125 | 0.15 | 1 | HC_vs_MS.NoTrt_B |
| MRPS30     | 0.5278  | 0.54643 | 0.328 | 0.32 | 1 | HC_vs_MS.NoTrt_B |
| ZFP36      | 0.52808 | 0.32884 | 0.393 | 0.45 | 1 | HC_vs_MS.NoTrt_B |
| WDR36      | 0.52817 | 0.57702 | 0.142 | 0.12 | 1 | HC_vs_MS.NoTrt_B |
| PGGHG      | 0.52842 | 0.49569 | 0.146 | 0.13 | 1 | HC_vs_MS.NoTrt_B |
| ST20-MTHFS | 0.52856 | 0.68867 | 0.116 | 0.1  | 1 | HC_vs_MS.NoTrt_B |
| SLC25A40   | 0.5294  | -0.2758 | 0.297 | 0.29 | 1 | HC_vs_MS.NoTrt_B |
| FBXW12     | 0.52944 | 0.26035 | 0.323 | 0.36 | 1 | HC_vs_MS.NoTrt_B |
| USP21      | 0.52983 | 0.53706 | 0.113 | 0.1  | 1 | HC_vs_MS.NoTrt_B |
| ZNF223     | 0.52985 | 0.97938 | 0.101 | 0.09 | 1 | HC_vs_MS.NoTrt_B |
| PDS5A      | 0.5302  | 0.37109 | 0.754 | 0.8  | 1 | HC_vs_MS.NoTrt_B |
| MEGF8      | 0.5306  | 0.71103 | 0.393 | 0.38 | 1 | HC_vs_MS.NoTrt_B |
| RNF103     | 0.53081 | 0.44304 | 0.574 | 0.58 | 1 | HC_vs_MS.NoTrt_B |
| ZNRF1      | 0.53163 | 0.4272  | 0.274 | 0.26 | 1 | HC_vs_MS.NoTrt_B |
| CDK16      | 0.53181 | 0.53599 | 0.113 | 0.1  | 1 | HC_vs_MS.NoTrt_B |
| ZP3        | 0.53197 | 0.47663 | 0.601 | 0.61 | 1 | HC_vs_MS.NoTrt_B |
| ALDH5A1    | 0.53206 | 0.92253 | 0.468 | 0.51 | 1 | HC_vs_MS.NoTrt_B |
| ADNP       | 0.53207 | 0.8264  | 0.438 | 0.47 | 1 | HC_vs_MS.NoTrt_B |
| BOLA2      | 0.5323  | 0.43484 | 0.123 | 0.15 | 1 | HC_vs_MS.NoTrt_B |
| NIPSNAP1   | 0.53234 | -0.5037 | 0.393 | 0.35 | 1 | HC_vs_MS.NoTrt_B |
| TGOLN2     | 0.53264 | 0.50824 | 0.619 | 0.65 | 1 | HC_vs_MS.NoTrt_B |
| PPP2CA     | 0.53268 | 0.38495 | 0.691 | 0.78 | 1 | HC_vs_MS.NoTrt_B |
| RSBN1      | 0.53269 | 0.30897 | 0.249 | 0.23 | 1 | HC_vs_MS.NoTrt_B |
| ILDR2      | 0.53273 | 0.26563 | 0.304 | 0.29 | 1 | HC_vs_MS.NoTrt_B |
| WHAMM      | 0.53282 | 0.38886 | 0.814 | 0.84 | 1 | HC_vs_MS.NoTrt_B |
| C1GALT1    | 0.53326 | 0.57017 | 0.564 | 0.58 | 1 | HC_vs_MS.NoTrt_B |
| MUM1       | 0.53372 | -0.2648 | 0.599 | 0.58 | 1 | HC_vs_MS.NoTrt_B |
| OGG1       | 0.5339  | 0.31712 | 0.364 | 0.34 | 1 | HC_vs_MS.NoTrt_B |
| AP3M2      | 0.53427 | 0.36237 | 0.101 | 0.09 | 1 | HC_vs_MS.NoTrt_B |
| PCGF3      | 0.53451 | 0.28189 | 0.229 | 0.25 | 1 | HC_vs_MS.NoTrt_B |
| CREB1      | 0.53463 | 0.37051 | 0.643 | 0.71 | 1 | HC_vs_MS.NoTrt_B |
| TLR3       | 0.53466 | 0.28799 | 0.286 | 0.28 | 1 | HC_vs_MS.NoTrt_B |
| NDC80      | 0.53497 | -0.8181 | 0.684 | 0.7  | 1 | HC_vs_MS.NoTrt_B |
| TXK        | 0.53499 | 0.54844 | 0.599 | 0.63 | 1 | HC_vs_MS.NoTrt_B |
| STOML1     | 0.53504 | -0.4654 | 0.765 | 0.82 | 1 | HC_vs_MS.NoTrt_B |
| NMT2       | 0.53509 | -0.4577 | 0.925 | 0.92 | 1 | HC_vs_MS.NoTrt_B |
| TBC1D2B    | 0.5352  | 0.97333 | 0.294 | 0.33 | 1 | HC_vs_MS.NoTrt_B |

|          |         |         |       |      |   |                  |
|----------|---------|---------|-------|------|---|------------------|
| CCDC38   | 0.53528 | 0.29132 | 0.378 | 0.38 | 1 | HC_vs_MS.NoTrt_B |
| NR1I3    | 0.5353  | 0.30228 | 0.399 | 0.4  | 1 | HC_vs_MS.NoTrt_B |
| NR6A1    | 0.53548 | 0.27936 | 0.378 | 0.39 | 1 | HC_vs_MS.NoTrt_B |
| DCDC1    | 0.53553 | 0.36257 | 0.48  | 0.47 | 1 | HC_vs_MS.NoTrt_B |
| C3orf33  | 0.53578 | 0.25406 | 0.475 | 0.48 | 1 | HC_vs_MS.NoTrt_B |
| CTDSP2   | 0.53604 | 0.52992 | 0.216 | 0.25 | 1 | HC_vs_MS.NoTrt_B |
| GMIP     | 0.53605 | 0.99454 | 0.254 | 0.3  | 1 | HC_vs_MS.NoTrt_B |
| RBCK1    | 0.53695 | 0.32094 | 0.201 | 0.23 | 1 | HC_vs_MS.NoTrt_B |
| FIGNL1   | 0.53721 | 0.54579 | 0.114 | 0.14 | 1 | HC_vs_MS.NoTrt_B |
| FOXRED2  | 0.53724 | 0.35396 | 0.529 | 0.55 | 1 | HC_vs_MS.NoTrt_B |
| OFD1     | 0.53726 | 0.53375 | 0.246 | 0.24 | 1 | HC_vs_MS.NoTrt_B |
| PAM16    | 0.53741 | 0.4562  | 0.181 | 0.2  | 1 | HC_vs_MS.NoTrt_B |
| ASIC4    | 0.53757 | 0.44771 | 0.21  | 0.2  | 1 | HC_vs_MS.NoTrt_B |
| CDK6     | 0.53811 | 0.51167 | 0.145 | 0.17 | 1 | HC_vs_MS.NoTrt_B |
| SLC39A4  | 0.53886 | 0.38626 | 0.386 | 0.37 | 1 | HC_vs_MS.NoTrt_B |
| ZNF410   | 0.53932 | -0.4941 | 0.535 | 0.5  | 1 | HC_vs_MS.NoTrt_B |
| USP6NL   | 0.53936 | 0.6505  | 0.768 | 0.82 | 1 | HC_vs_MS.NoTrt_B |
| MRPL52   | 0.53975 | 0.52627 | 0.626 | 0.67 | 1 | HC_vs_MS.NoTrt_B |
| ARSK     | 0.54003 | -0.26   | 0.538 | 0.6  | 1 | HC_vs_MS.NoTrt_B |
| GALE     | 0.54073 | -1.1128 | 0.323 | 0.36 | 1 | HC_vs_MS.NoTrt_B |
| RELA     | 0.54078 | 0.58918 | 0.154 | 0.18 | 1 | HC_vs_MS.NoTrt_B |
| JAKMIP2  | 0.54155 | -0.8136 | 0.352 | 0.38 | 1 | HC_vs_MS.NoTrt_B |
| STON2    | 0.54224 | 0.36666 | 0.258 | 0.29 | 1 | HC_vs_MS.NoTrt_B |
| ZNF260   | 0.54268 | 0.33217 | 0.506 | 0.55 | 1 | HC_vs_MS.NoTrt_B |
| OGFOD1   | 0.54309 | -0.2837 | 0.596 | 0.68 | 1 | HC_vs_MS.NoTrt_B |
| GPATCH4  | 0.54309 | 0.92404 | 0.277 | 0.31 | 1 | HC_vs_MS.NoTrt_B |
| HYOU1    | 0.5432  | 0.33328 | 0.475 | 0.47 | 1 | HC_vs_MS.NoTrt_B |
| WDFY1    | 0.54367 | 0.57006 | 0.339 | 0.33 | 1 | HC_vs_MS.NoTrt_B |
| PROSER1  | 0.54478 | 0.28855 | 0.171 | 0.2  | 1 | HC_vs_MS.NoTrt_B |
| PDE8A    | 0.54482 | 0.99782 | 0.397 | 0.44 | 1 | HC_vs_MS.NoTrt_B |
| NCOA3    | 0.54507 | 0.32575 | 0.739 | 0.78 | 1 | HC_vs_MS.NoTrt_B |
| HDAC9    | 0.54508 | 0.95118 | 0.459 | 0.51 | 1 | HC_vs_MS.NoTrt_B |
| FAM83G   | 0.54512 | 0.70084 | 0.432 | 0.43 | 1 | HC_vs_MS.NoTrt_B |
| ERCC6L2  | 0.54586 | 0.33918 | 0.203 | 0.18 | 1 | HC_vs_MS.NoTrt_B |
| CCNG2    | 0.54615 | 0.29276 | 0.265 | 0.29 | 1 | HC_vs_MS.NoTrt_B |
| TBRG1    | 0.5462  | 0.42253 | 0.632 | 0.68 | 1 | HC_vs_MS.NoTrt_B |
| KIAA1841 | 0.54624 | 0.41216 | 0.846 | 0.88 | 1 | HC_vs_MS.NoTrt_B |
| PCF11    | 0.54636 | 0.35902 | 0.519 | 0.53 | 1 | HC_vs_MS.NoTrt_B |
| USP48    | 0.54647 | 0.44347 | 0.499 | 0.54 | 1 | HC_vs_MS.NoTrt_B |
| DMGDH    | 0.5468  | 0.2827  | 0.397 | 0.45 | 1 | HC_vs_MS.NoTrt_B |

|          |         |         |       |      |   |                  |
|----------|---------|---------|-------|------|---|------------------|
| TIMM21   | 0.5469  | 0.5045  | 0.633 | 0.63 | 1 | HC_vs_MS.NoTrt_B |
| SRSF11   | 0.54691 | 0.25922 | 0.771 | 0.82 | 1 | HC_vs_MS.NoTrt_B |
| UBR3     | 0.54703 | 0.71417 | 0.116 | 0.14 | 1 | HC_vs_MS.NoTrt_B |
| GLUL     | 0.54745 | 0.37374 | 0.158 | 0.18 | 1 | HC_vs_MS.NoTrt_B |
| CEP76    | 0.54752 | 0.50365 | 0.787 | 0.82 | 1 | HC_vs_MS.NoTrt_B |
| SC5D     | 0.54762 | 0.32426 | 0.517 | 0.51 | 1 | HC_vs_MS.NoTrt_B |
| ZNF565   | 0.54788 | 0.82941 | 0.093 | 0.11 | 1 | HC_vs_MS.NoTrt_B |
| GOLGA8A  | 0.54833 | 0.61235 | 0.412 | 0.47 | 1 | HC_vs_MS.NoTrt_B |
| C2CD2    | 0.54834 | 0.71936 | 0.22  | 0.21 | 1 | HC_vs_MS.NoTrt_B |
| C16orf58 | 0.54844 | 0.28228 | 0.107 | 0.09 | 1 | HC_vs_MS.NoTrt_B |
| ANKRD18A | 0.54867 | 0.42564 | 0.232 | 0.22 | 1 | HC_vs_MS.NoTrt_B |
| UNG      | 0.54894 | 0.79614 | 0.2   | 0.18 | 1 | HC_vs_MS.NoTrt_B |
| FOCAD    | 0.54904 | 0.77713 | 0.529 | 0.55 | 1 | HC_vs_MS.NoTrt_B |
| SUDS3    | 0.54925 | 0.38783 | 0.775 | 0.81 | 1 | HC_vs_MS.NoTrt_B |
| VIL1     | 0.54959 | 0.42713 | 0.155 | 0.17 | 1 | HC_vs_MS.NoTrt_B |
| ANKRD13C | 0.54989 | 0.3054  | 0.167 | 0.19 | 1 | HC_vs_MS.NoTrt_B |
| NBEAL1   | 0.5502  | 0.74932 | 0.87  | 0.89 | 1 | HC_vs_MS.NoTrt_B |
| PPP4R3B  | 0.55031 | 0.30498 | 0.425 | 0.45 | 1 | HC_vs_MS.NoTrt_B |
| PYCR1    | 0.55053 | -0.6606 | 0.406 | 0.45 | 1 | HC_vs_MS.NoTrt_B |
| TMEM65   | 0.55066 | 0.46751 | 0.683 | 0.72 | 1 | HC_vs_MS.NoTrt_B |
| COA1     | 0.55105 | 0.3784  | 0.759 | 0.82 | 1 | HC_vs_MS.NoTrt_B |
| PLEKHS1  | 0.5517  | 0.25707 | 0.152 | 0.14 | 1 | HC_vs_MS.NoTrt_B |
| SFR1     | 0.55171 | 0.29141 | 0.242 | 0.27 | 1 | HC_vs_MS.NoTrt_B |
| KIAA0100 | 0.55181 | 1.1156  | 0.497 | 0.5  | 1 | HC_vs_MS.NoTrt_B |
| VNN3     | 0.55188 | 0.32597 | 0.358 | 0.37 | 1 | HC_vs_MS.NoTrt_B |
| TPX2     | 0.55193 | 0.69425 | 0.181 | 0.2  | 1 | HC_vs_MS.NoTrt_B |
| PDLIM2   | 0.55228 | 0.25303 | 0.729 | 0.78 | 1 | HC_vs_MS.NoTrt_B |
| ATG3     | 0.55232 | 0.2962  | 0.409 | 0.36 | 1 | HC_vs_MS.NoTrt_B |
| FBXL4    | 0.55243 | 0.47816 | 0.554 | 0.55 | 1 | HC_vs_MS.NoTrt_B |
| VAMP7    | 0.55341 | 0.25201 | 0.099 | 0.11 | 1 | HC_vs_MS.NoTrt_B |
| MMAB     | 0.55368 | 0.41311 | 0.664 | 0.67 | 1 | HC_vs_MS.NoTrt_B |
| ZNF805   | 0.554   | 0.4463  | 0.739 | 0.74 | 1 | HC_vs_MS.NoTrt_B |
| CCDC7    | 0.55416 | 0.2994  | 0.122 | 0.14 | 1 | HC_vs_MS.NoTrt_B |
| DENND3   | 0.55419 | 0.46187 | 0.454 | 0.45 | 1 | HC_vs_MS.NoTrt_B |
| ELOVL7   | 0.55447 | 0.29996 | 0.319 | 0.31 | 1 | HC_vs_MS.NoTrt_B |
| PCDHB9   | 0.55468 | 0.26596 | 0.348 | 0.4  | 1 | HC_vs_MS.NoTrt_B |
| MAP3K9   | 0.55476 | 0.6477  | 0.448 | 0.52 | 1 | HC_vs_MS.NoTrt_B |
| PTCD1    | 0.55501 | 0.38332 | 0.59  | 0.61 | 1 | HC_vs_MS.NoTrt_B |
| RCAN3    | 0.55514 | 0.2539  | 0.781 | 0.81 | 1 | HC_vs_MS.NoTrt_B |
| PDZD7    | 0.55526 | 0.34143 | 0.483 | 0.51 | 1 | HC_vs_MS.NoTrt_B |



|          |         |         |       |      |   |                  |
|----------|---------|---------|-------|------|---|------------------|
| LRR8B    | 0.55602 | 1.20692 | 0.409 | 0.47 | 1 | HC_vs_MS.NoTrt_B |
| METTL25  | 0.55609 | 0.67581 | 0.18  | 0.16 | 1 | HC_vs_MS.NoTrt_B |
| ATP6V1E1 | 0.55616 | -0.7225 | 0.632 | 0.66 | 1 | HC_vs_MS.NoTrt_B |
| SGCB     | 0.55693 | 0.44389 | 0.267 | 0.24 | 1 | HC_vs_MS.NoTrt_B |
| HELZ2    | 0.55734 | 0.83472 | 0.633 | 0.7  | 1 | HC_vs_MS.NoTrt_B |
| TUBGCP3  | 0.5574  | 0.55262 | 0.167 | 0.19 | 1 | HC_vs_MS.NoTrt_B |
| TTC19    | 0.55825 | 0.29856 | 0.762 | 0.75 | 1 | HC_vs_MS.NoTrt_B |
| HECTD4   | 0.55852 | 0.87907 | 0.662 | 0.69 | 1 | HC_vs_MS.NoTrt_B |
| RSAD1    | 0.55933 | 0.60001 | 0.087 | 0.1  | 1 | HC_vs_MS.NoTrt_B |
| AP3S2    | 0.55977 | -0.2924 | 0.694 | 0.68 | 1 | HC_vs_MS.NoTrt_B |
| CNOT4    | 0.55978 | 0.61042 | 0.686 | 0.74 | 1 | HC_vs_MS.NoTrt_B |
| ULK2     | 0.56046 | 0.37757 | 0.701 | 0.74 | 1 | HC_vs_MS.NoTrt_B |
| KDM3A    | 0.56167 | 0.2655  | 0.146 | 0.13 | 1 | HC_vs_MS.NoTrt_B |
| ACAD10   | 0.56174 | 0.35018 | 0.446 | 0.49 | 1 | HC_vs_MS.NoTrt_B |
| MKLN1    | 0.56224 | 0.37165 | 0.572 | 0.6  | 1 | HC_vs_MS.NoTrt_B |
| ATP7B    | 0.56226 | 0.74119 | 0.2   | 0.18 | 1 | HC_vs_MS.NoTrt_B |
| SORD     | 0.56242 | 0.83578 | 0.142 | 0.16 | 1 | HC_vs_MS.NoTrt_B |
| POLR2B   | 0.56243 | 0.50198 | 0.446 | 0.48 | 1 | HC_vs_MS.NoTrt_B |
| ICOSLG   | 0.56244 | 0.25701 | 0.722 | 0.75 | 1 | HC_vs_MS.NoTrt_B |
| HERC5    | 0.56259 | 0.35205 | 0.21  | 0.23 | 1 | HC_vs_MS.NoTrt_B |
| FNBP4    | 0.56276 | 0.41546 | 0.481 | 0.48 | 1 | HC_vs_MS.NoTrt_B |
| SOCS7    | 0.56278 | 0.55938 | 0.349 | 0.4  | 1 | HC_vs_MS.NoTrt_B |
| CMBL     | 0.5631  | 0.2577  | 0.48  | 0.5  | 1 | HC_vs_MS.NoTrt_B |
| LSR      | 0.56324 | -0.3384 | 0.152 | 0.17 | 1 | HC_vs_MS.NoTrt_B |
| GBA2     | 0.56328 | 0.51606 | 0.567 | 0.59 | 1 | HC_vs_MS.NoTrt_B |
| FKBP5    | 0.56347 | 0.3229  | 0.762 | 0.88 | 1 | HC_vs_MS.NoTrt_B |
| TMIGD2   | 0.56358 | 0.61304 | 0.199 | 0.19 | 1 | HC_vs_MS.NoTrt_B |
| ST8SIA6  | 0.56361 | 0.86325 | 0.443 | 0.51 | 1 | HC_vs_MS.NoTrt_B |
| RWDD3    | 0.56423 | 0.389   | 0.126 | 0.15 | 1 | HC_vs_MS.NoTrt_B |
| SEC62    | 0.56465 | 0.38835 | 0.414 | 0.44 | 1 | HC_vs_MS.NoTrt_B |
| ATG16L2  | 0.56475 | 0.28276 | 0.816 | 0.87 | 1 | HC_vs_MS.NoTrt_B |
| MCL1     | 0.5649  | 0.63179 | 0.372 | 0.38 | 1 | HC_vs_MS.NoTrt_B |
| SLC37A2  | 0.56508 | 0.36725 | 0.525 | 0.59 | 1 | HC_vs_MS.NoTrt_B |
| RHPN2    | 0.56526 | 0.39009 | 0.548 | 0.57 | 1 | HC_vs_MS.NoTrt_B |
| ZFYVE28  | 0.5657  | 0.48151 | 0.133 | 0.15 | 1 | HC_vs_MS.NoTrt_B |
| TDG      | 0.56577 | 0.52164 | 0.339 | 0.32 | 1 | HC_vs_MS.NoTrt_B |
| UTP14A   | 0.5662  | -0.5297 | 0.18  | 0.16 | 1 | HC_vs_MS.NoTrt_B |
| ZNF652   | 0.56666 | 0.46368 | 0.493 | 0.53 | 1 | HC_vs_MS.NoTrt_B |
| RAD1     | 0.56708 | 0.27566 | 0.72  | 0.73 | 1 | HC_vs_MS.NoTrt_B |
| SPTLC1   | 0.56724 | -0.2547 | 0.723 | 0.74 | 1 | HC_vs_MS.NoTrt_B |

|          |         |         |       |      |   |                  |
|----------|---------|---------|-------|------|---|------------------|
| COIL     | 0.56725 | 0.78633 | 0.106 | 0.12 | 1 | HC_vs_MS.NoTrt_B |
| ZNF790   | 0.56821 | -0.6342 | 0.488 | 0.52 | 1 | HC_vs_MS.NoTrt_B |
| HIST1H3E | 0.56845 | -0.2716 | 0.112 | 0.1  | 1 | HC_vs_MS.NoTrt_B |
| ZNF285   | 0.5687  | 0.25435 | 0.297 | 0.29 | 1 | HC_vs_MS.NoTrt_B |
| ABO      | 0.5689  | -0.459  | 0.362 | 0.36 | 1 | HC_vs_MS.NoTrt_B |
| RSRC1    | 0.56965 | -0.2519 | 0.739 | 0.71 | 1 | HC_vs_MS.NoTrt_B |
| UBA2     | 0.57006 | 0.40777 | 0.513 | 0.54 | 1 | HC_vs_MS.NoTrt_B |
| KIF3A    | 0.57017 | 0.44737 | 0.675 | 0.72 | 1 | HC_vs_MS.NoTrt_B |
| DDHD2    | 0.5703  | 0.45335 | 0.793 | 0.81 | 1 | HC_vs_MS.NoTrt_B |
| PSTPIP1  | 0.57048 | -0.381  | 0.414 | 0.43 | 1 | HC_vs_MS.NoTrt_B |
| PSMD10   | 0.57136 | 0.5281  | 0.316 | 0.3  | 1 | HC_vs_MS.NoTrt_B |
| ZNF471   | 0.5715  | 0.26253 | 0.819 | 0.89 | 1 | HC_vs_MS.NoTrt_B |
| UBTF     | 0.57155 | 0.76263 | 0.212 | 0.2  | 1 | HC_vs_MS.NoTrt_B |
| SHCBP1   | 0.57162 | 0.25611 | 0.707 | 0.76 | 1 | HC_vs_MS.NoTrt_B |
| CAMK1    | 0.57189 | 0.41843 | 0.516 | 0.56 | 1 | HC_vs_MS.NoTrt_B |
| PITHD1   | 0.572   | 0.34434 | 0.145 | 0.13 | 1 | HC_vs_MS.NoTrt_B |
| NBPF9    | 0.57204 | 0.51128 | 0.709 | 0.72 | 1 | HC_vs_MS.NoTrt_B |
| GAB3     | 0.5722  | 1.08466 | 0.346 | 0.39 | 1 | HC_vs_MS.NoTrt_B |
| POLR1C   | 0.57226 | 0.35689 | 0.412 | 0.38 | 1 | HC_vs_MS.NoTrt_B |
| RPF2     | 0.5724  | 0.25294 | 0.304 | 0.29 | 1 | HC_vs_MS.NoTrt_B |
| ANTXRL   | 0.57323 | 0.32596 | 0.204 | 0.24 | 1 | HC_vs_MS.NoTrt_B |
| HSPD1    | 0.57355 | 0.48404 | 0.193 | 0.22 | 1 | HC_vs_MS.NoTrt_B |
| PATL2    | 0.57379 | 1.009   | 0.358 | 0.37 | 1 | HC_vs_MS.NoTrt_B |
| PPP2R3A  | 0.57402 | 0.26068 | 0.701 | 0.76 | 1 | HC_vs_MS.NoTrt_B |
| FHIT     | 0.57421 | 0.42628 | 0.657 | 0.63 | 1 | HC_vs_MS.NoTrt_B |
| PDE4B    | 0.57427 | 0.3909  | 0.28  | 0.31 | 1 | HC_vs_MS.NoTrt_B |
| PRKRA    | 0.57432 | 0.37713 | 0.216 | 0.24 | 1 | HC_vs_MS.NoTrt_B |
| SPC25    | 0.57459 | 0.41347 | 0.677 | 0.72 | 1 | HC_vs_MS.NoTrt_B |
| GPATCH1  | 0.57464 | -0.6043 | 0.361 | 0.38 | 1 | HC_vs_MS.NoTrt_B |
| APPL1    | 0.57468 | 0.89083 | 0.414 | 0.41 | 1 | HC_vs_MS.NoTrt_B |
| DSP      | 0.57484 | 0.27508 | 0.096 | 0.11 | 1 | HC_vs_MS.NoTrt_B |
| RASAL2   | 0.5749  | 0.26485 | 0.481 | 0.47 | 1 | HC_vs_MS.NoTrt_B |
| KIAA1551 | 0.57518 | 0.32942 | 0.497 | 0.58 | 1 | HC_vs_MS.NoTrt_B |
| NUP205   | 0.57598 | 0.79733 | 0.174 | 0.2  | 1 | HC_vs_MS.NoTrt_B |
| SEMA4F   | 0.57648 | -0.2637 | 0.486 | 0.52 | 1 | HC_vs_MS.NoTrt_B |
| TAB2     | 0.57655 | 0.32321 | 0.584 | 0.57 | 1 | HC_vs_MS.NoTrt_B |
| FAF1     | 0.57657 | 0.29497 | 0.436 | 0.47 | 1 | HC_vs_MS.NoTrt_B |
| C2orf49  | 0.5773  | 0.30873 | 0.425 | 0.42 | 1 | HC_vs_MS.NoTrt_B |
| MFSD9    | 0.57749 | -0.5223 | 0.488 | 0.47 | 1 | HC_vs_MS.NoTrt_B |
| COPA     | 0.57753 | 0.25341 | 0.223 | 0.25 | 1 | HC_vs_MS.NoTrt_B |

|          |         |         |       |      |   |                  |
|----------|---------|---------|-------|------|---|------------------|
| TMEM161B | 0.57762 | 0.36678 | 0.641 | 0.68 | 1 | HC_vs_MS.NoTrt_B |
| CDH26    | 0.57783 | 0.39493 | 0.159 | 0.15 | 1 | HC_vs_MS.NoTrt_B |
| SARM1    | 0.57784 | -0.4109 | 0.443 | 0.43 | 1 | HC_vs_MS.NoTrt_B |
| EP300    | 0.57827 | 0.44062 | 0.707 | 0.72 | 1 | HC_vs_MS.NoTrt_B |
| CROCC    | 0.57836 | 0.3783  | 0.48  | 0.47 | 1 | HC_vs_MS.NoTrt_B |
| KLF7     | 0.57855 | -1.0472 | 0.188 | 0.16 | 1 | HC_vs_MS.NoTrt_B |
| TJP3     | 0.57923 | 0.4531  | 0.103 | 0.12 | 1 | HC_vs_MS.NoTrt_B |
| ZNF517   | 0.57934 | 0.3625  | 0.375 | 0.37 | 1 | HC_vs_MS.NoTrt_B |
| ACER1    | 0.57954 | 0.42495 | 0.438 | 0.46 | 1 | HC_vs_MS.NoTrt_B |
| UBE2G2   | 0.58049 | -0.3027 | 0.713 | 0.74 | 1 | HC_vs_MS.NoTrt_B |
| DCUN1D3  | 0.58051 | 0.33259 | 0.139 | 0.12 | 1 | HC_vs_MS.NoTrt_B |
| ANKRD40  | 0.58128 | 0.26526 | 0.746 | 0.78 | 1 | HC_vs_MS.NoTrt_B |
| MAML2    | 0.58156 | 0.53559 | 0.272 | 0.26 | 1 | HC_vs_MS.NoTrt_B |
| PPP1R3E  | 0.58158 | -0.3094 | 0.209 | 0.23 | 1 | HC_vs_MS.NoTrt_B |
| SMG6     | 0.58192 | -0.3877 | 0.188 | 0.2  | 1 | HC_vs_MS.NoTrt_B |
| YARS2    | 0.58224 | 0.39891 | 0.377 | 0.36 | 1 | HC_vs_MS.NoTrt_B |
| CUBN     | 0.58247 | 0.53767 | 0.397 | 0.41 | 1 | HC_vs_MS.NoTrt_B |
| FAR2     | 0.58295 | 0.95768 | 0.186 | 0.21 | 1 | HC_vs_MS.NoTrt_B |
| MAP2K7   | 0.58343 | 0.43115 | 0.609 | 0.64 | 1 | HC_vs_MS.NoTrt_B |
| SLC26A11 | 0.58364 | -0.3498 | 0.654 | 0.71 | 1 | HC_vs_MS.NoTrt_B |
| NDFIP2   | 0.58367 | 0.60267 | 0.132 | 0.12 | 1 | HC_vs_MS.NoTrt_B |
| GRK5     | 0.58374 | -0.3142 | 0.155 | 0.17 | 1 | HC_vs_MS.NoTrt_B |
| PLA2G7   | 0.58403 | 0.38841 | 0.594 | 0.62 | 1 | HC_vs_MS.NoTrt_B |
| CCDC22   | 0.58426 | 0.56649 | 0.129 | 0.11 | 1 | HC_vs_MS.NoTrt_B |
| SFXN1    | 0.58436 | 0.37974 | 0.775 | 0.82 | 1 | HC_vs_MS.NoTrt_B |
| IL20RB   | 0.58453 | 0.77741 | 0.229 | 0.22 | 1 | HC_vs_MS.NoTrt_B |
| SETD4    | 0.58537 | 0.53698 | 0.483 | 0.48 | 1 | HC_vs_MS.NoTrt_B |
| LARGE1   | 0.58566 | 0.25936 | 0.557 | 0.55 | 1 | HC_vs_MS.NoTrt_B |
| 3-Mar    | 0.58586 | 0.50043 | 0.326 | 0.36 | 1 | HC_vs_MS.NoTrt_B |
| CMTR2    | 0.58631 | 0.57392 | 0.257 | 0.24 | 1 | HC_vs_MS.NoTrt_B |
| TMEM39B  | 0.58645 | 0.49188 | 0.17  | 0.19 | 1 | HC_vs_MS.NoTrt_B |
| SES3     | 0.58662 | 0.83803 | 0.259 | 0.25 | 1 | HC_vs_MS.NoTrt_B |
| CNNM3    | 0.58662 | 0.61325 | 0.609 | 0.63 | 1 | HC_vs_MS.NoTrt_B |
| SUN1     | 0.58684 | 0.88044 | 0.593 | 0.61 | 1 | HC_vs_MS.NoTrt_B |
| SES1     | 0.58695 | 0.66383 | 0.19  | 0.18 | 1 | HC_vs_MS.NoTrt_B |
| HEMGN    | 0.58723 | 0.30006 | 0.117 | 0.14 | 1 | HC_vs_MS.NoTrt_B |
| CGN      | 0.58793 | 0.287   | 0.201 | 0.2  | 1 | HC_vs_MS.NoTrt_B |
| NFATC1   | 0.588   | 0.57749 | 0.164 | 0.15 | 1 | HC_vs_MS.NoTrt_B |
| ZNF770   | 0.5883  | 0.2951  | 0.322 | 0.34 | 1 | HC_vs_MS.NoTrt_B |
| SP1      | 0.58897 | 0.84551 | 0.168 | 0.16 | 1 | HC_vs_MS.NoTrt_B |

|             |         |         |       |      |   |                  |
|-------------|---------|---------|-------|------|---|------------------|
| NBN         | 0.58899 | 0.3671  | 0.104 | 0.12 | 1 | HC_vs_MS.NoTrt_B |
| TP53        | 0.58953 | 0.41599 | 0.772 | 0.84 | 1 | HC_vs_MS.NoTrt_B |
| SNX19       | 0.58968 | 0.26664 | 0.21  | 0.23 | 1 | HC_vs_MS.NoTrt_B |
| PHTF1       | 0.58996 | -0.4894 | 0.428 | 0.45 | 1 | HC_vs_MS.NoTrt_B |
| TFR2        | 0.59004 | 0.28036 | 0.696 | 0.71 | 1 | HC_vs_MS.NoTrt_B |
| CTBS        | 0.5901  | 0.43222 | 0.125 | 0.14 | 1 | HC_vs_MS.NoTrt_B |
| MTMR10      | 0.59012 | 0.59932 | 0.159 | 0.18 | 1 | HC_vs_MS.NoTrt_B |
| LPAR4       | 0.59016 | 0.53489 | 0.132 | 0.12 | 1 | HC_vs_MS.NoTrt_B |
| TBC1D20     | 0.59102 | 0.75943 | 0.568 | 0.63 | 1 | HC_vs_MS.NoTrt_B |
| PPP5C       | 0.59141 | 0.30984 | 0.397 | 0.39 | 1 | HC_vs_MS.NoTrt_B |
| PUM3        | 0.59241 | 0.34257 | 0.135 | 0.12 | 1 | HC_vs_MS.NoTrt_B |
| BBS2        | 0.59254 | 0.26655 | 0.661 | 0.72 | 1 | HC_vs_MS.NoTrt_B |
| RHEB        | 0.5928  | 0.4365  | 0.128 | 0.15 | 1 | HC_vs_MS.NoTrt_B |
| WRAP73      | 0.59281 | 0.37992 | 0.33  | 0.31 | 1 | HC_vs_MS.NoTrt_B |
| SGK1        | 0.59285 | -0.436  | 0.371 | 0.37 | 1 | HC_vs_MS.NoTrt_B |
| SKIDA1      | 0.5931  | -0.2708 | 0.404 | 0.41 | 1 | HC_vs_MS.NoTrt_B |
| TRIP11      | 0.59336 | 0.41956 | 0.52  | 0.5  | 1 | HC_vs_MS.NoTrt_B |
| DDX60L      | 0.59342 | 0.55615 | 0.714 | 0.76 | 1 | HC_vs_MS.NoTrt_B |
| P4HB        | 0.59351 | -0.2889 | 0.654 | 0.65 | 1 | HC_vs_MS.NoTrt_B |
| MBD6        | 0.5936  | 0.73152 | 0.199 | 0.18 | 1 | HC_vs_MS.NoTrt_B |
| SNX5        | 0.59383 | 0.26703 | 0.583 | 0.63 | 1 | HC_vs_MS.NoTrt_B |
| RBM26       | 0.59394 | 0.78335 | 0.468 | 0.5  | 1 | HC_vs_MS.NoTrt_B |
| C18orf32    | 0.59434 | 0.27222 | 0.835 | 0.87 | 1 | HC_vs_MS.NoTrt_B |
| FBXO6       | 0.59539 | 0.73462 | 0.617 | 0.71 | 1 | HC_vs_MS.NoTrt_B |
| KCNK3       | 0.59644 | 0.37123 | 0.609 | 0.68 | 1 | HC_vs_MS.NoTrt_B |
| PHLDA1      | 0.59674 | -0.3754 | 0.459 | 0.44 | 1 | HC_vs_MS.NoTrt_B |
| GLT8D1      | 0.59711 | -0.4195 | 0.229 | 0.24 | 1 | HC_vs_MS.NoTrt_B |
| AC138645.2  | 0.59725 | 0.39149 | 0.112 | 0.1  | 1 | HC_vs_MS.NoTrt_B |
| PDP2        | 0.59748 | -0.4121 | 0.778 | 0.87 | 1 | HC_vs_MS.NoTrt_B |
| JOSD1       | 0.59818 | 0.72105 | 0.533 | 0.5  | 1 | HC_vs_MS.NoTrt_B |
| POLR3H      | 0.59829 | 0.46249 | 0.238 | 0.22 | 1 | HC_vs_MS.NoTrt_B |
| QRSL1       | 0.59891 | 0.45391 | 0.555 | 0.6  | 1 | HC_vs_MS.NoTrt_B |
| CEP63       | 0.59903 | -0.4151 | 0.699 | 0.76 | 1 | HC_vs_MS.NoTrt_B |
| POU5F2      | 0.60107 | 0.64302 | 0.678 | 0.68 | 1 | HC_vs_MS.NoTrt_B |
| IWS1        | 0.60131 | 0.6096  | 0.128 | 0.15 | 1 | HC_vs_MS.NoTrt_B |
| CUL9        | 0.60162 | 0.47362 | 0.154 | 0.17 | 1 | HC_vs_MS.NoTrt_B |
| BET1        | 0.60168 | 0.27131 | 0.568 | 0.56 | 1 | HC_vs_MS.NoTrt_B |
| CLEC4E      | 0.60198 | 0.29501 | 0.343 | 0.4  | 1 | HC_vs_MS.NoTrt_B |
| ZFP2        | 0.60319 | 1.18095 | 0.19  | 0.18 | 1 | HC_vs_MS.NoTrt_B |
| CTD-2192J10 | 0.60325 | 0.71261 | 0.133 | 0.12 | 1 | HC_vs_MS.NoTrt_B |

|          |         |         |       |      |   |                  |
|----------|---------|---------|-------|------|---|------------------|
| ZNF235   | 0.60408 | 0.79173 | 0.103 | 0.09 | 1 | HC_vs_MS.NoTrt_B |
| ANKEF1   | 0.60427 | 0.68701 | 0.214 | 0.25 | 1 | HC_vs_MS.NoTrt_B |
| ZNF280B  | 0.60441 | 0.58291 | 0.116 | 0.13 | 1 | HC_vs_MS.NoTrt_B |
| GSTO2    | 0.60449 | 0.39328 | 0.858 | 0.91 | 1 | HC_vs_MS.NoTrt_B |
| PCYT1A   | 0.60466 | -0.3964 | 0.507 | 0.5  | 1 | HC_vs_MS.NoTrt_B |
| PPP4R1   | 0.60476 | -0.637  | 0.238 | 0.25 | 1 | HC_vs_MS.NoTrt_B |
| WDR33    | 0.60499 | 0.74397 | 0.254 | 0.25 | 1 | HC_vs_MS.NoTrt_B |
| GTF2E2   | 0.60512 | 0.7937  | 0.588 | 0.62 | 1 | HC_vs_MS.NoTrt_B |
| PAK1     | 0.60539 | -1.137  | 0.155 | 0.17 | 1 | HC_vs_MS.NoTrt_B |
| UBE2A    | 0.60582 | 0.55767 | 0.346 | 0.32 | 1 | HC_vs_MS.NoTrt_B |
| SLC25A51 | 0.6059  | 0.51059 | 0.538 | 0.57 | 1 | HC_vs_MS.NoTrt_B |
| ZNF555   | 0.60664 | 0.85512 | 0.587 | 0.61 | 1 | HC_vs_MS.NoTrt_B |
| VARS2    | 0.60728 | 0.5324  | 0.471 | 0.45 | 1 | HC_vs_MS.NoTrt_B |
| TUT1     | 0.60734 | -0.6244 | 0.097 | 0.11 | 1 | HC_vs_MS.NoTrt_B |
| EGFL8    | 0.60737 | 0.32735 | 0.483 | 0.52 | 1 | HC_vs_MS.NoTrt_B |
| KIF9     | 0.60747 | 0.34358 | 0.106 | 0.09 | 1 | HC_vs_MS.NoTrt_B |
| CFD      | 0.6076  | 0.79785 | 0.151 | 0.14 | 1 | HC_vs_MS.NoTrt_B |
| TECPR2   | 0.60778 | 1.09013 | 0.345 | 0.34 | 1 | HC_vs_MS.NoTrt_B |
| NAA30    | 0.6078  | 0.84427 | 0.443 | 0.46 | 1 | HC_vs_MS.NoTrt_B |
| RAB3IP   | 0.60808 | 0.71358 | 0.674 | 0.67 | 1 | HC_vs_MS.NoTrt_B |
| PHC3     | 0.60848 | 0.36866 | 0.958 | 0.98 | 1 | HC_vs_MS.NoTrt_B |
| GPN2     | 0.60856 | -0.259  | 0.774 | 0.76 | 1 | HC_vs_MS.NoTrt_B |
| TMPRSS3  | 0.60887 | 0.50856 | 0.342 | 0.33 | 1 | HC_vs_MS.NoTrt_B |
| ANGEL2   | 0.60952 | 0.36485 | 0.696 | 0.69 | 1 | HC_vs_MS.NoTrt_B |
| TASP1    | 0.60953 | 0.37507 | 0.11  | 0.1  | 1 | HC_vs_MS.NoTrt_B |
| CLDND1   | 0.6096  | 0.32657 | 0.355 | 0.4  | 1 | HC_vs_MS.NoTrt_B |
| PPM1K    | 0.61011 | -0.3715 | 0.875 | 0.89 | 1 | HC_vs_MS.NoTrt_B |
| PRR23C   | 0.61013 | 0.34255 | 0.4   | 0.42 | 1 | HC_vs_MS.NoTrt_B |
| ASUN     | 0.61063 | 0.54994 | 0.109 | 0.12 | 1 | HC_vs_MS.NoTrt_B |
| ROCK2    | 0.6107  | 0.9213  | 0.439 | 0.48 | 1 | HC_vs_MS.NoTrt_B |
| PRRC2B   | 0.61081 | 0.38926 | 0.268 | 0.25 | 1 | HC_vs_MS.NoTrt_B |
| ALS2     | 0.61121 | 0.89365 | 0.435 | 0.45 | 1 | HC_vs_MS.NoTrt_B |
| MAN2C1   | 0.61137 | 0.31972 | 0.8   | 0.78 | 1 | HC_vs_MS.NoTrt_B |
| KIAA0922 | 0.61165 | 0.32998 | 0.49  | 0.53 | 1 | HC_vs_MS.NoTrt_B |
| D2HGDH   | 0.61165 | 0.86984 | 0.439 | 0.43 | 1 | HC_vs_MS.NoTrt_B |
| IL17RE   | 0.61299 | -0.6155 | 0.259 | 0.24 | 1 | HC_vs_MS.NoTrt_B |
| NBAS     | 0.61356 | 0.53701 | 0.213 | 0.2  | 1 | HC_vs_MS.NoTrt_B |
| ABCE1    | 0.6137  | 0.4406  | 0.346 | 0.33 | 1 | HC_vs_MS.NoTrt_B |
| BRD8     | 0.6139  | -0.332  | 0.735 | 0.77 | 1 | HC_vs_MS.NoTrt_B |
| NFATC2   | 0.61413 | 0.74409 | 0.178 | 0.17 | 1 | HC_vs_MS.NoTrt_B |

|             |         |         |       |      |   |                  |
|-------------|---------|---------|-------|------|---|------------------|
| RP11-894J14 | 0.61452 | 0.27765 | 0.112 | 0.12 | 1 | HC_vs_MS.NoTrt_B |
| PLEKHG4B    | 0.61519 | 0.38236 | 0.386 | 0.44 | 1 | HC_vs_MS.NoTrt_B |
| HSD11B1L    | 0.61722 | 0.26496 | 0.649 | 0.7  | 1 | HC_vs_MS.NoTrt_B |
| FBXO5       | 0.6176  | -0.3253 | 0.401 | 0.4  | 1 | HC_vs_MS.NoTrt_B |
| DYNAP       | 0.61767 | 0.26572 | 0.187 | 0.18 | 1 | HC_vs_MS.NoTrt_B |
| TMEM191C    | 0.6178  | 0.50039 | 0.662 | 0.72 | 1 | HC_vs_MS.NoTrt_B |
| PPP2R2A     | 0.61861 | 0.50828 | 0.126 | 0.14 | 1 | HC_vs_MS.NoTrt_B |
| 1-Mar       | 0.619   | 0.48766 | 0.583 | 0.61 | 1 | HC_vs_MS.NoTrt_B |
| MARK3       | 0.6191  | 0.29286 | 0.875 | 0.92 | 1 | HC_vs_MS.NoTrt_B |
| ABLIM1      | 0.61961 | 0.57555 | 0.413 | 0.43 | 1 | HC_vs_MS.NoTrt_B |
| PRMT1       | 0.6199  | -0.3192 | 0.81  | 0.82 | 1 | HC_vs_MS.NoTrt_B |
| MSL1        | 0.61991 | 0.41222 | 0.554 | 0.64 | 1 | HC_vs_MS.NoTrt_B |
| PLK1        | 0.61999 | -0.2911 | 0.383 | 0.42 | 1 | HC_vs_MS.NoTrt_B |
| SCUBE3      | 0.62012 | 0.34861 | 0.601 | 0.67 | 1 | HC_vs_MS.NoTrt_B |
| ANTXR2      | 0.62023 | -0.3507 | 0.672 | 0.67 | 1 | HC_vs_MS.NoTrt_B |
| TGIF2       | 0.62028 | 0.32999 | 0.343 | 0.32 | 1 | HC_vs_MS.NoTrt_B |
| RDH16       | 0.62037 | 0.26599 | 0.684 | 0.73 | 1 | HC_vs_MS.NoTrt_B |
| FGD6        | 0.62047 | 0.97519 | 0.43  | 0.43 | 1 | HC_vs_MS.NoTrt_B |
| HEATR3      | 0.62076 | 0.53278 | 0.625 | 0.68 | 1 | HC_vs_MS.NoTrt_B |
| PCNX3       | 0.62087 | 0.61104 | 0.103 | 0.09 | 1 | HC_vs_MS.NoTrt_B |
| PNPLA2      | 0.62122 | 0.35586 | 0.17  | 0.16 | 1 | HC_vs_MS.NoTrt_B |
| RNF43       | 0.62189 | 0.25557 | 0.296 | 0.27 | 1 | HC_vs_MS.NoTrt_B |
| SNRK        | 0.62204 | 0.55529 | 0.545 | 0.55 | 1 | HC_vs_MS.NoTrt_B |
| RAB36       | 0.6221  | 0.34828 | 0.304 | 0.3  | 1 | HC_vs_MS.NoTrt_B |
| CD28        | 0.62224 | 0.31339 | 0.597 | 0.65 | 1 | HC_vs_MS.NoTrt_B |
| SENP1       | 0.62281 | 0.59932 | 0.167 | 0.15 | 1 | HC_vs_MS.NoTrt_B |
| CAMKMT      | 0.62302 | 0.84442 | 0.291 | 0.28 | 1 | HC_vs_MS.NoTrt_B |
| GPCPD1      | 0.62343 | 0.70321 | 0.293 | 0.29 | 1 | HC_vs_MS.NoTrt_B |
| PDXK        | 0.62363 | 0.81061 | 0.49  | 0.51 | 1 | HC_vs_MS.NoTrt_B |
| EMC2        | 0.62374 | -0.2997 | 0.465 | 0.5  | 1 | HC_vs_MS.NoTrt_B |
| LURAP1      | 0.62457 | 0.26654 | 0.339 | 0.35 | 1 | HC_vs_MS.NoTrt_B |
| PHC1        | 0.62501 | 0.44893 | 0.12  | 0.11 | 1 | HC_vs_MS.NoTrt_B |
| SGSM1       | 0.62504 | 0.36453 | 0.477 | 0.48 | 1 | HC_vs_MS.NoTrt_B |
| PES1        | 0.62573 | 0.28055 | 0.104 | 0.09 | 1 | HC_vs_MS.NoTrt_B |
| STX7        | 0.62621 | 0.78442 | 0.72  | 0.74 | 1 | HC_vs_MS.NoTrt_B |
| TMEM186     | 0.62628 | 0.48893 | 0.51  | 0.56 | 1 | HC_vs_MS.NoTrt_B |
| LYRM1       | 0.62631 | 0.84812 | 0.548 | 0.57 | 1 | HC_vs_MS.NoTrt_B |
| SLCO2A1     | 0.62643 | 0.33566 | 0.357 | 0.37 | 1 | HC_vs_MS.NoTrt_B |
| BET1L       | 0.62644 | 0.35252 | 0.213 | 0.2  | 1 | HC_vs_MS.NoTrt_B |
| C9orf66     | 0.62697 | 0.25499 | 0.574 | 0.58 | 1 | HC_vs_MS.NoTrt_B |

|          |         |         |       |      |   |                  |
|----------|---------|---------|-------|------|---|------------------|
| PARP9    | 0.62743 | 0.73509 | 0.388 | 0.4  | 1 | HC_vs_MS.NoTrt_B |
| PIGO     | 0.62746 | 0.31539 | 0.342 | 0.32 | 1 | HC_vs_MS.NoTrt_B |
| NUDC     | 0.62759 | 0.2586  | 0.546 | 0.62 | 1 | HC_vs_MS.NoTrt_B |
| SNAPC5   | 0.62772 | 0.50836 | 0.536 | 0.57 | 1 | HC_vs_MS.NoTrt_B |
| SLC17A5  | 0.62797 | -0.5338 | 0.5   | 0.51 | 1 | HC_vs_MS.NoTrt_B |
| ZFAT     | 0.62832 | -0.8355 | 0.319 | 0.31 | 1 | HC_vs_MS.NoTrt_B |
| ABCA2    | 0.62961 | 1.0538  | 0.238 | 0.23 | 1 | HC_vs_MS.NoTrt_B |
| ZC2HC1C  | 0.62969 | 0.48988 | 0.109 | 0.12 | 1 | HC_vs_MS.NoTrt_B |
| FBLN1    | 0.62974 | 0.27855 | 0.146 | 0.14 | 1 | HC_vs_MS.NoTrt_B |
| UQCC1    | 0.62989 | 0.29014 | 0.517 | 0.52 | 1 | HC_vs_MS.NoTrt_B |
| LEAP2    | 0.63089 | 0.27541 | 0.191 | 0.21 | 1 | HC_vs_MS.NoTrt_B |
| ABCC5    | 0.63092 | -0.3206 | 0.136 | 0.15 | 1 | HC_vs_MS.NoTrt_B |
| GPX2     | 0.63097 | 0.49231 | 0.18  | 0.2  | 1 | HC_vs_MS.NoTrt_B |
| PTCD2    | 0.63154 | 0.44959 | 0.541 | 0.61 | 1 | HC_vs_MS.NoTrt_B |
| FAM185A  | 0.63177 | 0.37645 | 0.103 | 0.09 | 1 | HC_vs_MS.NoTrt_B |
| LRRC47   | 0.6318  | 0.34631 | 0.281 | 0.3  | 1 | HC_vs_MS.NoTrt_B |
| TRA2A    | 0.63203 | 0.31318 | 0.759 | 0.81 | 1 | HC_vs_MS.NoTrt_B |
| RNGTT    | 0.63255 | 0.35905 | 0.394 | 0.39 | 1 | HC_vs_MS.NoTrt_B |
| KIAA1614 | 0.63294 | 0.34643 | 0.303 | 0.34 | 1 | HC_vs_MS.NoTrt_B |
| FMNL3    | 0.63318 | 0.47191 | 0.235 | 0.22 | 1 | HC_vs_MS.NoTrt_B |
| ZNF486   | 0.63349 | 0.25133 | 0.649 | 0.65 | 1 | HC_vs_MS.NoTrt_B |
| NOMO2    | 0.6344  | 0.81811 | 0.184 | 0.18 | 1 | HC_vs_MS.NoTrt_B |
| MAPK9    | 0.63441 | 0.28757 | 0.442 | 0.48 | 1 | HC_vs_MS.NoTrt_B |
| IPCEF1   | 0.63508 | 0.31917 | 0.53  | 0.52 | 1 | HC_vs_MS.NoTrt_B |
| ZNF267   | 0.63513 | 0.32337 | 0.117 | 0.13 | 1 | HC_vs_MS.NoTrt_B |
| CCDC102B | 0.63553 | 0.34234 | 0.157 | 0.17 | 1 | HC_vs_MS.NoTrt_B |
| VHL      | 0.63578 | 0.26286 | 0.749 | 0.77 | 1 | HC_vs_MS.NoTrt_B |
| CWF19L1  | 0.63605 | -0.5522 | 0.784 | 0.83 | 1 | HC_vs_MS.NoTrt_B |
| CXCR2    | 0.63624 | 0.28089 | 0.28  | 0.28 | 1 | HC_vs_MS.NoTrt_B |
| INCA1    | 0.63636 | -0.4682 | 0.18  | 0.21 | 1 | HC_vs_MS.NoTrt_B |
| GRTP1    | 0.63649 | 0.32489 | 0.506 | 0.51 | 1 | HC_vs_MS.NoTrt_B |
| CNKSR1   | 0.63654 | -0.6097 | 0.138 | 0.15 | 1 | HC_vs_MS.NoTrt_B |
| ENTPD7   | 0.63669 | 0.51312 | 0.345 | 0.34 | 1 | HC_vs_MS.NoTrt_B |
| NAT9     | 0.63781 | 0.34768 | 0.18  | 0.2  | 1 | HC_vs_MS.NoTrt_B |
| ADAM15   | 0.63812 | -0.4213 | 0.361 | 0.34 | 1 | HC_vs_MS.NoTrt_B |
| DIAPH2   | 0.63824 | 0.66993 | 0.304 | 0.33 | 1 | HC_vs_MS.NoTrt_B |
| QSOX1    | 0.63869 | 0.33359 | 0.37  | 0.36 | 1 | HC_vs_MS.NoTrt_B |
| MED13    | 0.63872 | 0.35642 | 0.588 | 0.58 | 1 | HC_vs_MS.NoTrt_B |
| UCKL1    | 0.6388  | -0.269  | 0.113 | 0.12 | 1 | HC_vs_MS.NoTrt_B |
| PINK1    | 0.63906 | -0.2789 | 0.268 | 0.28 | 1 | HC_vs_MS.NoTrt_B |

|             |         |         |       |      |   |                  |
|-------------|---------|---------|-------|------|---|------------------|
| IQCK        | 0.63918 | 0.57614 | 0.19  | 0.22 | 1 | HC_vs_MS.NoTrt_B |
| VPS9D1      | 0.63961 | 0.26185 | 0.226 | 0.24 | 1 | HC_vs_MS.NoTrt_B |
| MTUS1       | 0.6397  | 1.07571 | 0.339 | 0.37 | 1 | HC_vs_MS.NoTrt_B |
| NUP50       | 0.63974 | 0.31945 | 0.649 | 0.69 | 1 | HC_vs_MS.NoTrt_B |
| FANCI       | 0.64106 | 0.29718 | 0.52  | 0.51 | 1 | HC_vs_MS.NoTrt_B |
| ARFIP1      | 0.64112 | -0.3127 | 0.212 | 0.22 | 1 | HC_vs_MS.NoTrt_B |
| CRIM1       | 0.6412  | 0.37542 | 0.139 | 0.13 | 1 | HC_vs_MS.NoTrt_B |
| GPR137B     | 0.64131 | 0.80855 | 0.088 | 0.1  | 1 | HC_vs_MS.NoTrt_B |
| SNTG2       | 0.64132 | 0.26751 | 0.219 | 0.21 | 1 | HC_vs_MS.NoTrt_B |
| SIK3        | 0.6426  | 0.54107 | 0.243 | 0.27 | 1 | HC_vs_MS.NoTrt_B |
| ZNF43       | 0.64286 | -0.3541 | 0.726 | 0.72 | 1 | HC_vs_MS.NoTrt_B |
| VPS18       | 0.64467 | -0.3727 | 0.197 | 0.21 | 1 | HC_vs_MS.NoTrt_B |
| CALD1       | 0.64503 | -0.6657 | 0.191 | 0.18 | 1 | HC_vs_MS.NoTrt_B |
| GNB2        | 0.64531 | 0.43034 | 0.491 | 0.5  | 1 | HC_vs_MS.NoTrt_B |
| ZNF831      | 0.6456  | 0.67001 | 0.236 | 0.23 | 1 | HC_vs_MS.NoTrt_B |
| MAPK8IP3    | 0.64565 | 0.35716 | 0.148 | 0.16 | 1 | HC_vs_MS.NoTrt_B |
| TEFM        | 0.6464  | 0.43718 | 0.652 | 0.7  | 1 | HC_vs_MS.NoTrt_B |
| C16orf45    | 0.64656 | 0.33631 | 0.203 | 0.18 | 1 | HC_vs_MS.NoTrt_B |
| RNASEH1     | 0.64711 | -0.2553 | 0.729 | 0.74 | 1 | HC_vs_MS.NoTrt_B |
| MEF2A       | 0.64784 | 0.4606  | 0.443 | 0.48 | 1 | HC_vs_MS.NoTrt_B |
| EHBP1       | 0.64784 | 0.4653  | 0.354 | 0.38 | 1 | HC_vs_MS.NoTrt_B |
| PCNX1       | 0.64791 | 0.2695  | 0.857 | 0.88 | 1 | HC_vs_MS.NoTrt_B |
| FCHO2       | 0.64829 | 0.60263 | 0.309 | 0.3  | 1 | HC_vs_MS.NoTrt_B |
| CNOT6L      | 0.64883 | 0.69162 | 0.274 | 0.27 | 1 | HC_vs_MS.NoTrt_B |
| EIF2B4      | 0.64889 | 0.70239 | 0.486 | 0.52 | 1 | HC_vs_MS.NoTrt_B |
| CH507-9B2.1 | 0.64936 | 0.52994 | 0.403 | 0.43 | 1 | HC_vs_MS.NoTrt_B |
| ACVR1       | 0.64958 | -0.394  | 0.193 | 0.21 | 1 | HC_vs_MS.NoTrt_B |
| UFM1        | 0.65004 | 0.40404 | 0.326 | 0.34 | 1 | HC_vs_MS.NoTrt_B |
| CIPC        | 0.65036 | -0.4269 | 0.37  | 0.4  | 1 | HC_vs_MS.NoTrt_B |
| GCN1        | 0.65036 | 0.4142  | 0.171 | 0.16 | 1 | HC_vs_MS.NoTrt_B |
| SLC12A7     | 0.65062 | 0.36098 | 0.138 | 0.15 | 1 | HC_vs_MS.NoTrt_B |
| ZNF720      | 0.65065 | 0.25003 | 0.497 | 0.51 | 1 | HC_vs_MS.NoTrt_B |
| CREBL2      | 0.65161 | 0.75949 | 0.09  | 0.1  | 1 | HC_vs_MS.NoTrt_B |
| NAF1        | 0.65166 | 0.53705 | 0.409 | 0.4  | 1 | HC_vs_MS.NoTrt_B |
| RFX2        | 0.65174 | 1.00337 | 0.477 | 0.49 | 1 | HC_vs_MS.NoTrt_B |
| STX8        | 0.65177 | -0.3175 | 0.854 | 0.91 | 1 | HC_vs_MS.NoTrt_B |
| ATP6V1C1    | 0.65184 | -0.3072 | 0.47  | 0.45 | 1 | HC_vs_MS.NoTrt_B |
| RFXANK      | 0.65206 | -0.7873 | 0.242 | 0.24 | 1 | HC_vs_MS.NoTrt_B |
| NUCKS1      | 0.65243 | 0.32455 | 0.496 | 0.55 | 1 | HC_vs_MS.NoTrt_B |
| JMJD6       | 0.65272 | -0.4988 | 0.455 | 0.44 | 1 | HC_vs_MS.NoTrt_B |



|           |         |         |       |      |   |                  |
|-----------|---------|---------|-------|------|---|------------------|
| DDIAS     | 0.65282 | 0.59857 | 0.355 | 0.35 | 1 | HC_vs_MS.NoTrt_B |
| GHRL      | 0.65285 | 0.35941 | 0.088 | 0.1  | 1 | HC_vs_MS.NoTrt_B |
| PML       | 0.65302 | 0.4629  | 0.596 | 0.6  | 1 | HC_vs_MS.NoTrt_B |
| PHF19     | 0.65307 | 0.46629 | 0.12  | 0.14 | 1 | HC_vs_MS.NoTrt_B |
| PRR29     | 0.65328 | 0.44862 | 0.171 | 0.2  | 1 | HC_vs_MS.NoTrt_B |
| LEF1      | 0.65329 | 0.34787 | 0.604 | 0.63 | 1 | HC_vs_MS.NoTrt_B |
| FBXW7     | 0.65332 | 0.49759 | 0.152 | 0.14 | 1 | HC_vs_MS.NoTrt_B |
| PAPD5     | 0.65357 | 0.49016 | 0.136 | 0.15 | 1 | HC_vs_MS.NoTrt_B |
| COL4A3BP  | 0.65393 | 0.59041 | 0.129 | 0.15 | 1 | HC_vs_MS.NoTrt_B |
| RASGEF1B  | 0.65416 | 0.56961 | 0.672 | 0.72 | 1 | HC_vs_MS.NoTrt_B |
| SMIM19    | 0.65428 | 0.54801 | 0.472 | 0.47 | 1 | HC_vs_MS.NoTrt_B |
| TRIM44    | 0.6543  | 0.67841 | 0.275 | 0.27 | 1 | HC_vs_MS.NoTrt_B |
| ARHGAP26  | 0.65478 | 0.40411 | 0.626 | 0.68 | 1 | HC_vs_MS.NoTrt_B |
| CSPP1     | 0.65481 | 1.13986 | 0.397 | 0.4  | 1 | HC_vs_MS.NoTrt_B |
| FMN1      | 0.65518 | 0.38646 | 0.206 | 0.2  | 1 | HC_vs_MS.NoTrt_B |
| FAM21C    | 0.6553  | 0.29067 | 0.203 | 0.22 | 1 | HC_vs_MS.NoTrt_B |
| HCFC1     | 0.65548 | 0.43387 | 0.296 | 0.29 | 1 | HC_vs_MS.NoTrt_B |
| PTK7      | 0.65555 | 0.25675 | 0.564 | 0.58 | 1 | HC_vs_MS.NoTrt_B |
| RBM14-RBM | 0.65608 | 0.60487 | 0.09  | 0.1  | 1 | HC_vs_MS.NoTrt_B |
| DYRK2     | 0.65693 | 0.52379 | 0.181 | 0.2  | 1 | HC_vs_MS.NoTrt_B |
| OAZ2      | 0.65719 | -0.2576 | 0.755 | 0.83 | 1 | HC_vs_MS.NoTrt_B |
| RHOT1     | 0.65753 | 0.27635 | 0.178 | 0.19 | 1 | HC_vs_MS.NoTrt_B |
| CUL4B     | 0.65762 | 0.60571 | 0.107 | 0.12 | 1 | HC_vs_MS.NoTrt_B |
| HEATR5B   | 0.65769 | 0.32824 | 0.438 | 0.46 | 1 | HC_vs_MS.NoTrt_B |
| HACL1     | 0.65816 | 0.40536 | 0.125 | 0.14 | 1 | HC_vs_MS.NoTrt_B |
| FCGRT     | 0.65824 | -0.4129 | 0.217 | 0.23 | 1 | HC_vs_MS.NoTrt_B |
| GNA11     | 0.65892 | 0.25863 | 0.53  | 0.51 | 1 | HC_vs_MS.NoTrt_B |
| RGCC      | 0.65894 | 0.50165 | 0.18  | 0.2  | 1 | HC_vs_MS.NoTrt_B |
| ATIC      | 0.65916 | 0.26439 | 0.377 | 0.41 | 1 | HC_vs_MS.NoTrt_B |
| SSBP3     | 0.66037 | -0.3106 | 0.394 | 0.43 | 1 | HC_vs_MS.NoTrt_B |
| ERC1      | 0.66038 | 0.42622 | 0.861 | 0.92 | 1 | HC_vs_MS.NoTrt_B |
| ARHGAP31  | 0.66091 | 0.3416  | 0.293 | 0.29 | 1 | HC_vs_MS.NoTrt_B |
| NANOS1    | 0.66132 | 0.26296 | 0.459 | 0.48 | 1 | HC_vs_MS.NoTrt_B |
| TMEM229B  | 0.6617  | 0.86264 | 0.172 | 0.19 | 1 | HC_vs_MS.NoTrt_B |
| PTBP3     | 0.66196 | 0.69387 | 0.325 | 0.36 | 1 | HC_vs_MS.NoTrt_B |
| PARP11    | 0.66216 | 0.66522 | 0.454 | 0.49 | 1 | HC_vs_MS.NoTrt_B |
| NANP      | 0.66229 | -0.7841 | 0.275 | 0.3  | 1 | HC_vs_MS.NoTrt_B |
| WDR55     | 0.6624  | -0.2648 | 0.613 | 0.67 | 1 | HC_vs_MS.NoTrt_B |
| MAP4K4    | 0.66244 | 0.27341 | 0.538 | 0.57 | 1 | HC_vs_MS.NoTrt_B |
| ZNF746    | 0.66282 | 0.25161 | 0.194 | 0.21 | 1 | HC_vs_MS.NoTrt_B |

|            |         |         |       |      |   |                  |
|------------|---------|---------|-------|------|---|------------------|
| AC138969.4 | 0.66292 | 0.51139 | 0.436 | 0.47 | 1 | HC_vs_MS.NoTrt_B |
| DBT        | 0.66299 | -0.5405 | 0.851 | 0.85 | 1 | HC_vs_MS.NoTrt_B |
| C2orf54    | 0.66303 | 0.29742 | 0.114 | 0.11 | 1 | HC_vs_MS.NoTrt_B |
| MLF1       | 0.66312 | 0.29795 | 0.293 | 0.29 | 1 | HC_vs_MS.NoTrt_B |
| FKRP       | 0.66421 | 0.34536 | 0.633 | 0.67 | 1 | HC_vs_MS.NoTrt_B |
| GYG1       | 0.66446 | -0.4402 | 0.542 | 0.52 | 1 | HC_vs_MS.NoTrt_B |
| PPP2R5A    | 0.66522 | 0.53803 | 0.187 | 0.2  | 1 | HC_vs_MS.NoTrt_B |
| TSG101     | 0.66534 | 0.25524 | 0.432 | 0.45 | 1 | HC_vs_MS.NoTrt_B |
| VWA7       | 0.66542 | 0.75625 | 0.313 | 0.31 | 1 | HC_vs_MS.NoTrt_B |
| BEND7      | 0.66643 | 0.28857 | 0.316 | 0.34 | 1 | HC_vs_MS.NoTrt_B |
| AHCTF1     | 0.66657 | 0.49181 | 0.133 | 0.15 | 1 | HC_vs_MS.NoTrt_B |
| LRRC8D     | 0.66704 | 0.40831 | 0.148 | 0.14 | 1 | HC_vs_MS.NoTrt_B |
| EHD3       | 0.66794 | 0.46012 | 0.091 | 0.1  | 1 | HC_vs_MS.NoTrt_B |
| PACSIN2    | 0.66814 | 0.26862 | 0.5   | 0.5  | 1 | HC_vs_MS.NoTrt_B |
| C19orf12   | 0.66827 | 0.44208 | 0.335 | 0.32 | 1 | HC_vs_MS.NoTrt_B |
| ZNF417     | 0.66864 | 0.80927 | 0.693 | 0.75 | 1 | HC_vs_MS.NoTrt_B |
| GCC2       | 0.66902 | 0.26145 | 0.806 | 0.83 | 1 | HC_vs_MS.NoTrt_B |
| PACS2      | 0.66916 | 0.51232 | 0.246 | 0.24 | 1 | HC_vs_MS.NoTrt_B |
| CCDC127    | 0.67012 | -0.4013 | 0.716 | 0.79 | 1 | HC_vs_MS.NoTrt_B |
| CLK4       | 0.6705  | 0.37098 | 0.657 | 0.69 | 1 | HC_vs_MS.NoTrt_B |
| YPEL1      | 0.67067 | 0.65833 | 0.414 | 0.41 | 1 | HC_vs_MS.NoTrt_B |
| STYXL1     | 0.67092 | -0.5666 | 0.268 | 0.25 | 1 | HC_vs_MS.NoTrt_B |
| TMEM2      | 0.67094 | 0.42338 | 0.584 | 0.57 | 1 | HC_vs_MS.NoTrt_B |
| TMEM19     | 0.67104 | -0.4421 | 0.743 | 0.78 | 1 | HC_vs_MS.NoTrt_B |
| KIF21A     | 0.67156 | 0.90207 | 0.142 | 0.16 | 1 | HC_vs_MS.NoTrt_B |
| TEX11      | 0.67189 | 0.27607 | 0.239 | 0.23 | 1 | HC_vs_MS.NoTrt_B |
| HBS1L      | 0.67194 | 0.36359 | 0.568 | 0.58 | 1 | HC_vs_MS.NoTrt_B |
| ZNF487     | 0.6724  | -0.8022 | 0.433 | 0.43 | 1 | HC_vs_MS.NoTrt_B |
| ZNF518A    | 0.67399 | 0.35848 | 0.113 | 0.12 | 1 | HC_vs_MS.NoTrt_B |
| SHC1       | 0.67406 | 0.30639 | 0.63  | 0.65 | 1 | HC_vs_MS.NoTrt_B |
| IL27RA     | 0.67488 | 0.35711 | 0.359 | 0.36 | 1 | HC_vs_MS.NoTrt_B |
| AHRR       | 0.67502 | 0.50282 | 0.113 | 0.13 | 1 | HC_vs_MS.NoTrt_B |
| TMCO6      | 0.67512 | -0.5575 | 0.475 | 0.51 | 1 | HC_vs_MS.NoTrt_B |
| SRPK2      | 0.6756  | 0.4609  | 0.328 | 0.36 | 1 | HC_vs_MS.NoTrt_B |
| NSUN5      | 0.67642 | 0.79759 | 0.312 | 0.35 | 1 | HC_vs_MS.NoTrt_B |
| SLC28A2    | 0.6767  | 0.28478 | 0.746 | 0.81 | 1 | HC_vs_MS.NoTrt_B |
| SLC12A6    | 0.67696 | 0.33936 | 0.759 | 0.8  | 1 | HC_vs_MS.NoTrt_B |
| CENPN      | 0.6772  | 0.4237  | 0.155 | 0.15 | 1 | HC_vs_MS.NoTrt_B |
| LRSAM1     | 0.67794 | 0.48043 | 0.132 | 0.12 | 1 | HC_vs_MS.NoTrt_B |
| MYO9A      | 0.67857 | 0.68748 | 0.323 | 0.35 | 1 | HC_vs_MS.NoTrt_B |

|          |         |         |       |      |   |                  |
|----------|---------|---------|-------|------|---|------------------|
| NSD1     | 0.67861 | 0.44284 | 0.645 | 0.65 | 1 | HC_vs_MS.NoTrt_B |
| ERCC4    | 0.67909 | 0.39636 | 0.858 | 0.89 | 1 | HC_vs_MS.NoTrt_B |
| FAIM     | 0.67921 | 0.55148 | 0.358 | 0.37 | 1 | HC_vs_MS.NoTrt_B |
| APLF     | 0.68015 | -0.259  | 0.128 | 0.14 | 1 | HC_vs_MS.NoTrt_B |
| RABEP1   | 0.68019 | 0.38824 | 0.201 | 0.2  | 1 | HC_vs_MS.NoTrt_B |
| RBM44    | 0.68053 | 0.38059 | 0.174 | 0.2  | 1 | HC_vs_MS.NoTrt_B |
| ZNF286A  | 0.68056 | 0.73577 | 0.354 | 0.38 | 1 | HC_vs_MS.NoTrt_B |
| AGPS     | 0.68064 | 0.50478 | 0.119 | 0.13 | 1 | HC_vs_MS.NoTrt_B |
| RSAD2    | 0.68075 | 0.99017 | 0.326 | 0.37 | 1 | HC_vs_MS.NoTrt_B |
| RC3H1    | 0.68085 | 0.59397 | 0.438 | 0.5  | 1 | HC_vs_MS.NoTrt_B |
| WDR76    | 0.68116 | -0.3395 | 0.658 | 0.69 | 1 | HC_vs_MS.NoTrt_B |
| STON1    | 0.68168 | -0.5956 | 0.301 | 0.31 | 1 | HC_vs_MS.NoTrt_B |
| TBRG4    | 0.68372 | 0.25222 | 0.391 | 0.38 | 1 | HC_vs_MS.NoTrt_B |
| RNF207   | 0.68421 | -0.6164 | 0.661 | 0.73 | 1 | HC_vs_MS.NoTrt_B |
| ITCH     | 0.68457 | 0.46338 | 0.47  | 0.5  | 1 | HC_vs_MS.NoTrt_B |
| LAX1     | 0.68485 | -0.5344 | 0.467 | 0.42 | 1 | HC_vs_MS.NoTrt_B |
| NOP16    | 0.68526 | 0.29707 | 0.201 | 0.2  | 1 | HC_vs_MS.NoTrt_B |
| POC1B    | 0.68559 | 0.26062 | 0.742 | 0.74 | 1 | HC_vs_MS.NoTrt_B |
| SLC16A4  | 0.68562 | 0.50099 | 0.662 | 0.68 | 1 | HC_vs_MS.NoTrt_B |
| MS4A6A   | 0.68626 | 0.32647 | 0.162 | 0.16 | 1 | HC_vs_MS.NoTrt_B |
| KIAA1033 | 0.68725 | 0.3931  | 0.281 | 0.3  | 1 | HC_vs_MS.NoTrt_B |
| HDAC10   | 0.68737 | 0.94556 | 0.123 | 0.14 | 1 | HC_vs_MS.NoTrt_B |
| L2HGDH   | 0.6884  | 0.54344 | 0.807 | 0.89 | 1 | HC_vs_MS.NoTrt_B |
| GTF2B    | 0.68845 | 0.38613 | 0.167 | 0.18 | 1 | HC_vs_MS.NoTrt_B |
| GMPS     | 0.68955 | -0.5611 | 0.861 | 0.87 | 1 | HC_vs_MS.NoTrt_B |
| RUFY1    | 0.68976 | 0.42378 | 0.309 | 0.35 | 1 | HC_vs_MS.NoTrt_B |
| RRAGC    | 0.68992 | 0.41911 | 0.509 | 0.58 | 1 | HC_vs_MS.NoTrt_B |
| ASXL1    | 0.68994 | 0.4162  | 0.199 | 0.22 | 1 | HC_vs_MS.NoTrt_B |
| MRPS11   | 0.69012 | -0.3123 | 0.713 | 0.7  | 1 | HC_vs_MS.NoTrt_B |
| P4HA1    | 0.69014 | 0.28904 | 0.161 | 0.17 | 1 | HC_vs_MS.NoTrt_B |
| MFSD11   | 0.69098 | -0.6164 | 0.429 | 0.42 | 1 | HC_vs_MS.NoTrt_B |
| NSMCE3   | 0.69138 | 1.18544 | 0.319 | 0.32 | 1 | HC_vs_MS.NoTrt_B |
| SLCO2B1  | 0.6914  | 0.25996 | 0.309 | 0.31 | 1 | HC_vs_MS.NoTrt_B |
| SH3BP1   | 0.69153 | 0.92649 | 0.109 | 0.1  | 1 | HC_vs_MS.NoTrt_B |
| LRRC37A2 | 0.69223 | 0.33442 | 0.688 | 0.76 | 1 | HC_vs_MS.NoTrt_B |
| SRCAP    | 0.69234 | 0.32213 | 0.662 | 0.69 | 1 | HC_vs_MS.NoTrt_B |
| TP53INP1 | 0.69249 | 0.54691 | 0.351 | 0.37 | 1 | HC_vs_MS.NoTrt_B |
| NUDT16L1 | 0.69291 | 0.56276 | 0.11  | 0.1  | 1 | HC_vs_MS.NoTrt_B |
| MRPL32   | 0.69314 | 0.41443 | 0.122 | 0.14 | 1 | HC_vs_MS.NoTrt_B |
| N4BP1    | 0.69336 | 0.69345 | 0.11  | 0.1  | 1 | HC_vs_MS.NoTrt_B |

|          |         |         |       |      |   |                  |
|----------|---------|---------|-------|------|---|------------------|
| ZNF772   | 0.69357 | 0.45374 | 0.42  | 0.45 | 1 | HC_vs_MS.NoTrt_B |
| PIGS     | 0.69362 | 0.32364 | 0.48  | 0.51 | 1 | HC_vs_MS.NoTrt_B |
| PODXL    | 0.69408 | 0.28384 | 0.193 | 0.22 | 1 | HC_vs_MS.NoTrt_B |
| ZNF343   | 0.69446 | 1.66803 | 0.433 | 0.43 | 1 | HC_vs_MS.NoTrt_B |
| ZNF681   | 0.69522 | 0.29003 | 0.649 | 0.68 | 1 | HC_vs_MS.NoTrt_B |
| LANCL3   | 0.69549 | -0.4066 | 0.259 | 0.28 | 1 | HC_vs_MS.NoTrt_B |
| CDHR3    | 0.69568 | -0.272  | 0.617 | 0.62 | 1 | HC_vs_MS.NoTrt_B |
| CELA2A   | 0.69569 | 0.25104 | 0.519 | 0.53 | 1 | HC_vs_MS.NoTrt_B |
| AKT3     | 0.69584 | 0.45814 | 0.649 | 0.7  | 1 | HC_vs_MS.NoTrt_B |
| ADSSL1   | 0.69621 | 0.50408 | 0.257 | 0.25 | 1 | HC_vs_MS.NoTrt_B |
| RPTOR    | 0.69658 | 0.70897 | 0.378 | 0.4  | 1 | HC_vs_MS.NoTrt_B |
| CYB5R3   | 0.69743 | -0.272  | 0.474 | 0.49 | 1 | HC_vs_MS.NoTrt_B |
| DVL3     | 0.69746 | 0.79064 | 0.235 | 0.26 | 1 | HC_vs_MS.NoTrt_B |
| VPS13D   | 0.69781 | 0.60253 | 0.317 | 0.34 | 1 | HC_vs_MS.NoTrt_B |
| GPRC5C   | 0.69815 | 0.25118 | 0.264 | 0.26 | 1 | HC_vs_MS.NoTrt_B |
| GON4L    | 0.69858 | 0.41361 | 0.833 | 0.89 | 1 | HC_vs_MS.NoTrt_B |
| URB1     | 0.69896 | 0.57671 | 0.471 | 0.5  | 1 | HC_vs_MS.NoTrt_B |
| DCTN4    | 0.69897 | -0.2795 | 0.332 | 0.34 | 1 | HC_vs_MS.NoTrt_B |
| UBR4     | 0.69909 | 0.31438 | 0.752 | 0.78 | 1 | HC_vs_MS.NoTrt_B |
| NFXL1    | 0.69918 | 0.37345 | 0.103 | 0.11 | 1 | HC_vs_MS.NoTrt_B |
| CCS      | 0.70013 | -0.4166 | 0.204 | 0.22 | 1 | HC_vs_MS.NoTrt_B |
| GPBP1L1  | 0.70023 | 0.75756 | 0.458 | 0.44 | 1 | HC_vs_MS.NoTrt_B |
| HSPBAP1  | 0.70055 | 0.31742 | 0.5   | 0.51 | 1 | HC_vs_MS.NoTrt_B |
| CYP51A1  | 0.70091 | -0.3069 | 0.454 | 0.5  | 1 | HC_vs_MS.NoTrt_B |
| ZNF764   | 0.70135 | 0.27141 | 0.32  | 0.32 | 1 | HC_vs_MS.NoTrt_B |
| C1orf210 | 0.70221 | 0.33387 | 0.394 | 0.39 | 1 | HC_vs_MS.NoTrt_B |
| CBLB     | 0.70232 | 0.26958 | 0.355 | 0.36 | 1 | HC_vs_MS.NoTrt_B |
| ISCA1    | 0.7031  | -0.294  | 0.659 | 0.64 | 1 | HC_vs_MS.NoTrt_B |
| MAP3K2   | 0.7032  | 0.40179 | 0.171 | 0.16 | 1 | HC_vs_MS.NoTrt_B |
| SIRT3    | 0.70345 | 0.57944 | 0.294 | 0.32 | 1 | HC_vs_MS.NoTrt_B |
| ABHD6    | 0.70352 | -0.5569 | 0.461 | 0.46 | 1 | HC_vs_MS.NoTrt_B |
| IQCE     | 0.70382 | 0.31421 | 0.406 | 0.44 | 1 | HC_vs_MS.NoTrt_B |
| TMEM39A  | 0.70465 | 0.56345 | 0.117 | 0.11 | 1 | HC_vs_MS.NoTrt_B |
| AARS     | 0.70482 | 0.36424 | 0.426 | 0.42 | 1 | HC_vs_MS.NoTrt_B |
| TIMP2    | 0.70488 | 0.33172 | 0.165 | 0.16 | 1 | HC_vs_MS.NoTrt_B |
| RPS6KA3  | 0.70501 | 0.42218 | 0.491 | 0.55 | 1 | HC_vs_MS.NoTrt_B |
| LZTR1    | 0.7052  | 1.26526 | 0.248 | 0.28 | 1 | HC_vs_MS.NoTrt_B |
| HEMK1    | 0.70521 | -0.3731 | 0.951 | 0.98 | 1 | HC_vs_MS.NoTrt_B |
| FRA10AC1 | 0.70537 | 0.92074 | 0.532 | 0.61 | 1 | HC_vs_MS.NoTrt_B |
| STX17    | 0.7057  | 0.80089 | 0.452 | 0.5  | 1 | HC_vs_MS.NoTrt_B |

|          |         |         |       |      |   |                  |
|----------|---------|---------|-------|------|---|------------------|
| RCC1L    | 0.70594 | 0.44821 | 0.265 | 0.27 | 1 | HC_vs_MS.NoTrt_B |
| GPRIN3   | 0.70662 | 0.957   | 0.428 | 0.49 | 1 | HC_vs_MS.NoTrt_B |
| EML3     | 0.70673 | 0.33174 | 0.216 | 0.2  | 1 | HC_vs_MS.NoTrt_B |
| C22orf39 | 0.70689 | 0.61275 | 0.688 | 0.69 | 1 | HC_vs_MS.NoTrt_B |
| C8orf44  | 0.70705 | 0.26659 | 0.535 | 0.57 | 1 | HC_vs_MS.NoTrt_B |
| ISY1     | 0.70785 | -0.4581 | 0.612 | 0.64 | 1 | HC_vs_MS.NoTrt_B |
| MGAT4A   | 0.70839 | 0.566   | 0.406 | 0.41 | 1 | HC_vs_MS.NoTrt_B |
| LANCL1   | 0.70859 | 1.03386 | 0.122 | 0.14 | 1 | HC_vs_MS.NoTrt_B |
| SF3B3    | 0.70859 | -0.4088 | 0.954 | 0.96 | 1 | HC_vs_MS.NoTrt_B |
| NARS2    | 0.70903 | 0.30732 | 0.39  | 0.42 | 1 | HC_vs_MS.NoTrt_B |
| BCOR     | 0.70971 | 0.38488 | 0.112 | 0.1  | 1 | HC_vs_MS.NoTrt_B |
| SAMD9    | 0.70972 | 0.71545 | 0.183 | 0.18 | 1 | HC_vs_MS.NoTrt_B |
| SARDH    | 0.7098  | 0.46372 | 0.388 | 0.38 | 1 | HC_vs_MS.NoTrt_B |
| BLOC1S3  | 0.70996 | 0.27704 | 0.586 | 0.61 | 1 | HC_vs_MS.NoTrt_B |
| NUDT1    | 0.71021 | -0.4536 | 0.391 | 0.38 | 1 | HC_vs_MS.NoTrt_B |
| SPPL3    | 0.71025 | -0.4583 | 0.583 | 0.62 | 1 | HC_vs_MS.NoTrt_B |
| SGTB     | 0.71038 | 0.38005 | 0.654 | 0.65 | 1 | HC_vs_MS.NoTrt_B |
| KRAS     | 0.71055 | 0.58538 | 0.372 | 0.37 | 1 | HC_vs_MS.NoTrt_B |
| ACBD5    | 0.71124 | -0.513  | 0.467 | 0.45 | 1 | HC_vs_MS.NoTrt_B |
| LPAR6    | 0.71129 | 0.36217 | 0.396 | 0.38 | 1 | HC_vs_MS.NoTrt_B |
| CCNH     | 0.71138 | 0.2743  | 0.178 | 0.19 | 1 | HC_vs_MS.NoTrt_B |
| ZNF407   | 0.7116  | 0.71165 | 0.097 | 0.11 | 1 | HC_vs_MS.NoTrt_B |
| BIVM     | 0.71203 | 0.73896 | 0.328 | 0.32 | 1 | HC_vs_MS.NoTrt_B |
| SIPA1L1  | 0.71216 | 0.65908 | 0.594 | 0.64 | 1 | HC_vs_MS.NoTrt_B |
| CCDC174  | 0.71216 | 0.63642 | 0.12  | 0.11 | 1 | HC_vs_MS.NoTrt_B |
| FAM208A  | 0.71218 | 0.30283 | 0.736 | 0.72 | 1 | HC_vs_MS.NoTrt_B |
| CD22     | 0.71244 | 0.25379 | 0.778 | 0.83 | 1 | HC_vs_MS.NoTrt_B |
| NCKAP1   | 0.7135  | 0.33184 | 0.636 | 0.7  | 1 | HC_vs_MS.NoTrt_B |
| RRNAD1   | 0.71367 | 0.38966 | 0.643 | 0.67 | 1 | HC_vs_MS.NoTrt_B |
| PRKDC    | 0.71407 | 0.58605 | 0.622 | 0.65 | 1 | HC_vs_MS.NoTrt_B |
| FCRL1    | 0.71412 | 0.4638  | 0.249 | 0.24 | 1 | HC_vs_MS.NoTrt_B |
| TRNT1    | 0.71417 | -0.4613 | 0.319 | 0.28 | 1 | HC_vs_MS.NoTrt_B |
| UBIAD1   | 0.7142  | -0.2893 | 0.684 | 0.7  | 1 | HC_vs_MS.NoTrt_B |
| PDCD2    | 0.71455 | 0.50958 | 0.106 | 0.1  | 1 | HC_vs_MS.NoTrt_B |
| PKIA     | 0.71483 | 0.74828 | 0.104 | 0.1  | 1 | HC_vs_MS.NoTrt_B |
| LAMC3    | 0.71498 | -0.8617 | 0.264 | 0.27 | 1 | HC_vs_MS.NoTrt_B |
| DUS4L    | 0.7151  | -0.319  | 0.096 | 0.1  | 1 | HC_vs_MS.NoTrt_B |
| RCC2     | 0.71531 | 0.55482 | 0.093 | 0.1  | 1 | HC_vs_MS.NoTrt_B |
| CDC73    | 0.71539 | 0.66009 | 0.516 | 0.54 | 1 | HC_vs_MS.NoTrt_B |
| KLHDC10  | 0.71542 | 0.77859 | 0.387 | 0.4  | 1 | HC_vs_MS.NoTrt_B |

|          |         |         |       |      |   |                  |
|----------|---------|---------|-------|------|---|------------------|
| ZFC3H1   | 0.71559 | 0.39653 | 0.367 | 0.4  | 1 | HC_vs_MS.NoTrt_B |
| CARNMT1  | 0.71559 | 1.05517 | 0.097 | 0.11 | 1 | HC_vs_MS.NoTrt_B |
| ZNF66    | 0.71563 | -0.3135 | 0.648 | 0.69 | 1 | HC_vs_MS.NoTrt_B |
| SDR42E1  | 0.71625 | 1.19334 | 0.386 | 0.43 | 1 | HC_vs_MS.NoTrt_B |
| TIAL1    | 0.71657 | 0.6212  | 0.862 | 0.89 | 1 | HC_vs_MS.NoTrt_B |
| FAM3A    | 0.7167  | 0.68607 | 0.752 | 0.84 | 1 | HC_vs_MS.NoTrt_B |
| PFKFB2   | 0.71671 | 0.88501 | 0.2   | 0.2  | 1 | HC_vs_MS.NoTrt_B |
| PHF3     | 0.71674 | 0.45534 | 0.483 | 0.52 | 1 | HC_vs_MS.NoTrt_B |
| DDX23    | 0.71687 | -0.4158 | 0.662 | 0.68 | 1 | HC_vs_MS.NoTrt_B |
| ESYT3    | 0.71713 | 0.59372 | 0.462 | 0.51 | 1 | HC_vs_MS.NoTrt_B |
| NIT2     | 0.71722 | 0.38584 | 0.655 | 0.69 | 1 | HC_vs_MS.NoTrt_B |
| TRIM24   | 0.71723 | 0.29688 | 0.458 | 0.47 | 1 | HC_vs_MS.NoTrt_B |
| CPB1     | 0.71789 | 0.32407 | 0.483 | 0.51 | 1 | HC_vs_MS.NoTrt_B |
| PCTP     | 0.71817 | -0.4809 | 0.391 | 0.43 | 1 | HC_vs_MS.NoTrt_B |
| CCNF     | 0.71855 | 1.08134 | 0.439 | 0.46 | 1 | HC_vs_MS.NoTrt_B |
| C5       | 0.71905 | -0.2826 | 0.4   | 0.39 | 1 | HC_vs_MS.NoTrt_B |
| ATP8A1   | 0.71981 | 0.3264  | 0.161 | 0.17 | 1 | HC_vs_MS.NoTrt_B |
| GCLC     | 0.72018 | 0.56733 | 0.497 | 0.55 | 1 | HC_vs_MS.NoTrt_B |
| RGL2     | 0.72034 | 0.45838 | 0.135 | 0.15 | 1 | HC_vs_MS.NoTrt_B |
| GTF2IRD1 | 0.72089 | -0.299  | 0.645 | 0.64 | 1 | HC_vs_MS.NoTrt_B |
| AK5      | 0.72109 | 0.70915 | 0.142 | 0.14 | 1 | HC_vs_MS.NoTrt_B |
| IGF2BP1  | 0.72154 | 0.29917 | 0.533 | 0.55 | 1 | HC_vs_MS.NoTrt_B |
| CBX1     | 0.72216 | 0.26046 | 0.272 | 0.29 | 1 | HC_vs_MS.NoTrt_B |
| DOPEY2   | 0.72241 | -0.3317 | 0.768 | 0.8  | 1 | HC_vs_MS.NoTrt_B |
| TBC1D1   | 0.72254 | 0.55903 | 0.616 | 0.69 | 1 | HC_vs_MS.NoTrt_B |
| SPDYE6   | 0.72266 | 0.7258  | 0.122 | 0.14 | 1 | HC_vs_MS.NoTrt_B |
| CAND1    | 0.7231  | 0.34764 | 0.886 | 0.91 | 1 | HC_vs_MS.NoTrt_B |
| TCEAL8   | 0.72423 | 0.295   | 0.109 | 0.12 | 1 | HC_vs_MS.NoTrt_B |
| KLC1     | 0.72495 | 0.32165 | 0.586 | 0.67 | 1 | HC_vs_MS.NoTrt_B |
| NEBL     | 0.72496 | 0.61869 | 0.287 | 0.32 | 1 | HC_vs_MS.NoTrt_B |
| UNC13A   | 0.72551 | 0.54613 | 0.261 | 0.29 | 1 | HC_vs_MS.NoTrt_B |
| GNPNAT1  | 0.72569 | 0.33577 | 0.513 | 0.58 | 1 | HC_vs_MS.NoTrt_B |
| NBEAL2   | 0.72686 | 0.3596  | 0.206 | 0.22 | 1 | HC_vs_MS.NoTrt_B |
| PARD6G   | 0.7277  | 0.27082 | 0.41  | 0.41 | 1 | HC_vs_MS.NoTrt_B |
| POTEI    | 0.72777 | 0.32204 | 0.19  | 0.18 | 1 | HC_vs_MS.NoTrt_B |
| GFAP     | 0.72779 | 0.25036 | 0.733 | 0.82 | 1 | HC_vs_MS.NoTrt_B |
| IGFBP2   | 0.72815 | 0.25284 | 0.574 | 0.63 | 1 | HC_vs_MS.NoTrt_B |
| LMAN1    | 0.72816 | 0.60597 | 0.162 | 0.18 | 1 | HC_vs_MS.NoTrt_B |
| E2F8     | 0.72856 | 0.47069 | 0.133 | 0.15 | 1 | HC_vs_MS.NoTrt_B |
| ZCCHC14  | 0.72879 | 0.65428 | 0.104 | 0.1  | 1 | HC_vs_MS.NoTrt_B |

|          |         |         |       |      |   |                  |
|----------|---------|---------|-------|------|---|------------------|
| TOMM70   | 0.72939 | 0.53739 | 0.129 | 0.14 | 1 | HC_vs_MS.NoTrt_B |
| SLC35F6  | 0.72974 | -0.2607 | 0.759 | 0.81 | 1 | HC_vs_MS.NoTrt_B |
| LACTB    | 0.73068 | -0.3044 | 0.558 | 0.58 | 1 | HC_vs_MS.NoTrt_B |
| MTMR4    | 0.73076 | 0.52222 | 0.236 | 0.23 | 1 | HC_vs_MS.NoTrt_B |
| TRMT112  | 0.73148 | 0.27696 | 0.254 | 0.29 | 1 | HC_vs_MS.NoTrt_B |
| DUSP18   | 0.73154 | 0.26959 | 0.586 | 0.58 | 1 | HC_vs_MS.NoTrt_B |
| LTB4R    | 0.73226 | -0.7259 | 0.339 | 0.31 | 1 | HC_vs_MS.NoTrt_B |
| CCDC82   | 0.73234 | 0.45181 | 0.129 | 0.14 | 1 | HC_vs_MS.NoTrt_B |
| ATAD2B   | 0.73236 | 0.36775 | 0.628 | 0.69 | 1 | HC_vs_MS.NoTrt_B |
| POTEC    | 0.73241 | 0.50513 | 0.406 | 0.44 | 1 | HC_vs_MS.NoTrt_B |
| SNRNP27  | 0.73333 | 0.35712 | 0.278 | 0.31 | 1 | HC_vs_MS.NoTrt_B |
| HINT3    | 0.73356 | 0.49019 | 0.296 | 0.28 | 1 | HC_vs_MS.NoTrt_B |
| EVC      | 0.73367 | 0.91448 | 0.242 | 0.27 | 1 | HC_vs_MS.NoTrt_B |
| TNPO2    | 0.73375 | 0.47833 | 0.122 | 0.11 | 1 | HC_vs_MS.NoTrt_B |
| MCC      | 0.73376 | 0.36537 | 0.438 | 0.48 | 1 | HC_vs_MS.NoTrt_B |
| RECQL5   | 0.73409 | 0.50333 | 0.196 | 0.21 | 1 | HC_vs_MS.NoTrt_B |
| APOBR    | 0.7344  | 0.73501 | 0.104 | 0.11 | 1 | HC_vs_MS.NoTrt_B |
| FAM179A  | 0.73447 | -0.4375 | 0.772 | 0.78 | 1 | HC_vs_MS.NoTrt_B |
| MAD2L1   | 0.73475 | -0.3863 | 0.435 | 0.46 | 1 | HC_vs_MS.NoTrt_B |
| CYB5D1   | 0.7348  | 0.43973 | 0.138 | 0.13 | 1 | HC_vs_MS.NoTrt_B |
| GAREM2   | 0.73499 | 0.40568 | 0.499 | 0.52 | 1 | HC_vs_MS.NoTrt_B |
| UBE2W    | 0.73502 | 0.37034 | 0.626 | 0.64 | 1 | HC_vs_MS.NoTrt_B |
| PMM2     | 0.73666 | -0.3693 | 0.742 | 0.73 | 1 | HC_vs_MS.NoTrt_B |
| KIAA0907 | 0.73697 | 0.55832 | 0.762 | 0.78 | 1 | HC_vs_MS.NoTrt_B |
| TENM1    | 0.73707 | 0.90592 | 0.093 | 0.1  | 1 | HC_vs_MS.NoTrt_B |
| MINK1    | 0.73786 | 0.89223 | 0.252 | 0.26 | 1 | HC_vs_MS.NoTrt_B |
| BTBD11   | 0.738   | 1.37083 | 0.457 | 0.53 | 1 | HC_vs_MS.NoTrt_B |
| AGGF1    | 0.73803 | 1.04381 | 0.123 | 0.12 | 1 | HC_vs_MS.NoTrt_B |
| OGFR     | 0.73824 | 0.29463 | 0.187 | 0.18 | 1 | HC_vs_MS.NoTrt_B |
| FAM120B  | 0.73844 | 0.54171 | 0.346 | 0.38 | 1 | HC_vs_MS.NoTrt_B |
| PLOD2    | 0.73855 | 0.34552 | 0.387 | 0.42 | 1 | HC_vs_MS.NoTrt_B |
| SUGT1    | 0.73859 | 0.42047 | 0.903 | 0.94 | 1 | HC_vs_MS.NoTrt_B |
| ZNF846   | 0.73901 | 1.11268 | 0.446 | 0.44 | 1 | HC_vs_MS.NoTrt_B |
| HHLA3    | 0.7391  | 0.64816 | 0.343 | 0.38 | 1 | HC_vs_MS.NoTrt_B |
| XPO4     | 0.73938 | 1.17453 | 0.112 | 0.12 | 1 | HC_vs_MS.NoTrt_B |
| HDAC4    | 0.73954 | 0.30379 | 0.559 | 0.58 | 1 | HC_vs_MS.NoTrt_B |
| TMEM230  | 0.74063 | 0.28184 | 0.497 | 0.52 | 1 | HC_vs_MS.NoTrt_B |
| FGF11    | 0.74087 | 0.41328 | 0.21  | 0.21 | 1 | HC_vs_MS.NoTrt_B |
| USP54    | 0.74136 | 0.6115  | 0.58  | 0.63 | 1 | HC_vs_MS.NoTrt_B |
| CS       | 0.74226 | 0.35607 | 0.842 | 0.82 | 1 | HC_vs_MS.NoTrt_B |

|          |         |         |       |      |   |                  |
|----------|---------|---------|-------|------|---|------------------|
| CCDC15   | 0.74267 | -0.8345 | 0.216 | 0.21 | 1 | HC_vs_MS.NoTrt_B |
| ANKRD46  | 0.74305 | 0.47912 | 0.171 | 0.18 | 1 | HC_vs_MS.NoTrt_B |
| FBXO31   | 0.7432  | 1.32485 | 0.3   | 0.31 | 1 | HC_vs_MS.NoTrt_B |
| DCAKD    | 0.74373 | 0.69157 | 0.39  | 0.37 | 1 | HC_vs_MS.NoTrt_B |
| CIAO1    | 0.74393 | 0.3047  | 0.286 | 0.3  | 1 | HC_vs_MS.NoTrt_B |
| ETAA1    | 0.74411 | 0.31243 | 0.096 | 0.1  | 1 | HC_vs_MS.NoTrt_B |
| MAP2K4   | 0.74536 | 1.29971 | 0.213 | 0.21 | 1 | HC_vs_MS.NoTrt_B |
| MAGIX    | 0.74588 | 0.69113 | 0.465 | 0.48 | 1 | HC_vs_MS.NoTrt_B |
| TLL4     | 0.74598 | 0.5484  | 0.29  | 0.32 | 1 | HC_vs_MS.NoTrt_B |
| KCTD9    | 0.7461  | 0.6073  | 0.183 | 0.18 | 1 | HC_vs_MS.NoTrt_B |
| IDH2     | 0.74643 | -0.3666 | 0.513 | 0.51 | 1 | HC_vs_MS.NoTrt_B |
| MOB1A    | 0.74839 | 0.37724 | 0.825 | 0.88 | 1 | HC_vs_MS.NoTrt_B |
| RALGAPB  | 0.74883 | 0.25739 | 0.277 | 0.29 | 1 | HC_vs_MS.NoTrt_B |
| PLCB2    | 0.7492  | 0.29464 | 0.223 | 0.22 | 1 | HC_vs_MS.NoTrt_B |
| TNIP3    | 0.74927 | -0.2904 | 0.499 | 0.56 | 1 | HC_vs_MS.NoTrt_B |
| AEBP2    | 0.74974 | 0.38105 | 0.696 | 0.7  | 1 | HC_vs_MS.NoTrt_B |
| EBLN2    | 0.75065 | 0.46377 | 0.114 | 0.12 | 1 | HC_vs_MS.NoTrt_B |
| B4GALT5  | 0.75067 | 0.92545 | 0.251 | 0.28 | 1 | HC_vs_MS.NoTrt_B |
| ARHGAP44 | 0.75102 | 1.27795 | 0.242 | 0.24 | 1 | HC_vs_MS.NoTrt_B |
| C8orf76  | 0.75107 | -0.7425 | 0.572 | 0.58 | 1 | HC_vs_MS.NoTrt_B |
| OLAH     | 0.75113 | 0.25842 | 0.432 | 0.47 | 1 | HC_vs_MS.NoTrt_B |
| ADORA2A  | 0.75184 | -0.2702 | 0.117 | 0.12 | 1 | HC_vs_MS.NoTrt_B |
| AP2B1    | 0.752   | 0.37716 | 0.274 | 0.29 | 1 | HC_vs_MS.NoTrt_B |
| C21orf58 | 0.75224 | -0.272  | 0.464 | 0.49 | 1 | HC_vs_MS.NoTrt_B |
| FAF2     | 0.75273 | 0.73708 | 0.12  | 0.11 | 1 | HC_vs_MS.NoTrt_B |
| DGCR8    | 0.75352 | 0.46534 | 0.116 | 0.11 | 1 | HC_vs_MS.NoTrt_B |
| POLR2A   | 0.75383 | 0.39337 | 0.781 | 0.81 | 1 | HC_vs_MS.NoTrt_B |
| POMT1    | 0.75484 | -0.6152 | 0.538 | 0.58 | 1 | HC_vs_MS.NoTrt_B |
| SLC25A43 | 0.75491 | 0.47345 | 0.241 | 0.22 | 1 | HC_vs_MS.NoTrt_B |
| OR8H2    | 0.75503 | -0.3266 | 0.186 | 0.2  | 1 | HC_vs_MS.NoTrt_B |
| TNFSF13B | 0.75539 | -0.2945 | 0.5   | 0.52 | 1 | HC_vs_MS.NoTrt_B |
| AR       | 0.7557  | 0.31644 | 0.222 | 0.24 | 1 | HC_vs_MS.NoTrt_B |
| U2SURP   | 0.75644 | 0.27782 | 0.333 | 0.34 | 1 | HC_vs_MS.NoTrt_B |
| TCEAL3   | 0.7566  | -0.2589 | 0.11  | 0.12 | 1 | HC_vs_MS.NoTrt_B |
| CAPN15   | 0.75702 | 0.50701 | 0.207 | 0.2  | 1 | HC_vs_MS.NoTrt_B |
| NUPL2    | 0.75747 | 0.26713 | 0.962 | 0.98 | 1 | HC_vs_MS.NoTrt_B |
| RPRD1A   | 0.75821 | 0.29927 | 0.158 | 0.15 | 1 | HC_vs_MS.NoTrt_B |
| ZDHHC20  | 0.75873 | 0.29751 | 0.448 | 0.44 | 1 | HC_vs_MS.NoTrt_B |
| IL4R     | 0.75944 | 0.38148 | 0.425 | 0.43 | 1 | HC_vs_MS.NoTrt_B |
| SNX30    | 0.75962 | 0.58353 | 0.435 | 0.45 | 1 | HC_vs_MS.NoTrt_B |



|            |         |         |       |      |   |                  |
|------------|---------|---------|-------|------|---|------------------|
| LRFN1      | 0.75969 | 0.52933 | 0.142 | 0.15 | 1 | HC_vs_MS.NoTrt_B |
| HIVEP1     | 0.7604  | 0.93709 | 0.654 | 0.73 | 1 | HC_vs_MS.NoTrt_B |
| KLRC1      | 0.76062 | 0.53224 | 0.291 | 0.3  | 1 | HC_vs_MS.NoTrt_B |
| RANBP9     | 0.76098 | 0.37068 | 0.186 | 0.18 | 1 | HC_vs_MS.NoTrt_B |
| PANK2      | 0.76194 | 0.64923 | 0.517 | 0.54 | 1 | HC_vs_MS.NoTrt_B |
| SH2B3      | 0.76196 | 0.43291 | 0.142 | 0.15 | 1 | HC_vs_MS.NoTrt_B |
| LPIN3      | 0.76228 | 0.45873 | 0.432 | 0.43 | 1 | HC_vs_MS.NoTrt_B |
| IRGM       | 0.76243 | 0.32684 | 0.396 | 0.42 | 1 | HC_vs_MS.NoTrt_B |
| PPIF       | 0.76249 | 0.32108 | 0.094 | 0.1  | 1 | HC_vs_MS.NoTrt_B |
| DICER1     | 0.76327 | 0.74748 | 0.148 | 0.16 | 1 | HC_vs_MS.NoTrt_B |
| TP53BP1    | 0.76347 | 0.30027 | 0.252 | 0.24 | 1 | HC_vs_MS.NoTrt_B |
| VPS41      | 0.76367 | 0.34924 | 0.452 | 0.44 | 1 | HC_vs_MS.NoTrt_B |
| EHBP1L1    | 0.76369 | 0.66408 | 0.184 | 0.18 | 1 | HC_vs_MS.NoTrt_B |
| UNC45B     | 0.76374 | 0.33277 | 0.12  | 0.11 | 1 | HC_vs_MS.NoTrt_B |
| JADE1      | 0.76474 | 0.59817 | 0.326 | 0.32 | 1 | HC_vs_MS.NoTrt_B |
| ZNF395     | 0.76503 | 0.93578 | 0.542 | 0.61 | 1 | HC_vs_MS.NoTrt_B |
| FBXO42     | 0.76521 | 0.54843 | 0.449 | 0.49 | 1 | HC_vs_MS.NoTrt_B |
| RP11-1212A | 0.76531 | 0.3319  | 0.481 | 0.5  | 1 | HC_vs_MS.NoTrt_B |
| PPP1R16B   | 0.76561 | 0.56318 | 0.184 | 0.19 | 1 | HC_vs_MS.NoTrt_B |
| MRM2       | 0.76622 | 0.41685 | 0.31  | 0.32 | 1 | HC_vs_MS.NoTrt_B |
| PSMC4      | 0.76685 | -0.5503 | 0.457 | 0.45 | 1 | HC_vs_MS.NoTrt_B |
| RAC1       | 0.76701 | 0.76581 | 0.151 | 0.17 | 1 | HC_vs_MS.NoTrt_B |
| ZDHHC7     | 0.76713 | 0.35492 | 0.17  | 0.18 | 1 | HC_vs_MS.NoTrt_B |
| ZNF230     | 0.76746 | 0.76429 | 0.568 | 0.56 | 1 | HC_vs_MS.NoTrt_B |
| MRS2       | 0.76761 | -0.3366 | 0.764 | 0.77 | 1 | HC_vs_MS.NoTrt_B |
| CRIPAK     | 0.76793 | 0.35296 | 0.21  | 0.23 | 1 | HC_vs_MS.NoTrt_B |
| KIF1BP     | 0.76803 | 0.48967 | 0.617 | 0.63 | 1 | HC_vs_MS.NoTrt_B |
| TRIM39     | 0.76843 | 0.32756 | 0.112 | 0.12 | 1 | HC_vs_MS.NoTrt_B |
| RSPRY1     | 0.76857 | -0.3502 | 0.335 | 0.36 | 1 | HC_vs_MS.NoTrt_B |
| LYST       | 0.76882 | 1.25836 | 0.291 | 0.3  | 1 | HC_vs_MS.NoTrt_B |
| CLCN3      | 0.76922 | 1.0692  | 0.364 | 0.39 | 1 | HC_vs_MS.NoTrt_B |
| DNAJA4     | 0.76951 | 1.77675 | 0.112 | 0.11 | 1 | HC_vs_MS.NoTrt_B |
| MGLL       | 0.76952 | 0.38841 | 0.319 | 0.36 | 1 | HC_vs_MS.NoTrt_B |
| IMMP1L     | 0.7696  | 0.44107 | 0.559 | 0.58 | 1 | HC_vs_MS.NoTrt_B |
| TBC1D31    | 0.76977 | 0.45834 | 0.597 | 0.65 | 1 | HC_vs_MS.NoTrt_B |
| TJP2       | 0.76988 | 0.50051 | 0.339 | 0.37 | 1 | HC_vs_MS.NoTrt_B |
| MAN2A2     | 0.77171 | 0.59289 | 0.252 | 0.25 | 1 | HC_vs_MS.NoTrt_B |
| CTF1       | 0.77203 | -0.3236 | 0.248 | 0.24 | 1 | HC_vs_MS.NoTrt_B |
| MTERF3     | 0.77222 | -0.678  | 0.18  | 0.18 | 1 | HC_vs_MS.NoTrt_B |
| SMARCAD1   | 0.77303 | 0.8914  | 0.123 | 0.12 | 1 | HC_vs_MS.NoTrt_B |

|         |         |         |       |      |   |                  |
|---------|---------|---------|-------|------|---|------------------|
| RUNX3   | 0.77353 | 0.3711  | 0.136 | 0.13 | 1 | HC_vs_MS.NoTrt_B |
| EXOG    | 0.77377 | 0.45634 | 0.475 | 0.5  | 1 | HC_vs_MS.NoTrt_B |
| PTPN4   | 0.77427 | 0.25013 | 0.588 | 0.58 | 1 | HC_vs_MS.NoTrt_B |
| BAG2    | 0.7743  | 0.76572 | 0.23  | 0.25 | 1 | HC_vs_MS.NoTrt_B |
| TLE3    | 0.77473 | 0.66891 | 0.193 | 0.19 | 1 | HC_vs_MS.NoTrt_B |
| SYNGAP1 | 0.77478 | 1.03308 | 0.136 | 0.15 | 1 | HC_vs_MS.NoTrt_B |
| DDX11   | 0.77491 | -0.2761 | 0.414 | 0.38 | 1 | HC_vs_MS.NoTrt_B |
| POLR1A  | 0.77622 | -0.4391 | 0.672 | 0.69 | 1 | HC_vs_MS.NoTrt_B |
| ZMAT1   | 0.77652 | 0.93182 | 0.341 | 0.34 | 1 | HC_vs_MS.NoTrt_B |
| TMEM259 | 0.77671 | 1.21702 | 0.113 | 0.11 | 1 | HC_vs_MS.NoTrt_B |
| MAP3K3  | 0.7772  | 0.68065 | 0.142 | 0.14 | 1 | HC_vs_MS.NoTrt_B |
| ADCY9   | 0.77761 | 0.37111 | 0.261 | 0.28 | 1 | HC_vs_MS.NoTrt_B |
| CREB3L4 | 0.77821 | 1.282   | 0.399 | 0.4  | 1 | HC_vs_MS.NoTrt_B |
| EXT2    | 0.77859 | -0.4842 | 0.146 | 0.14 | 1 | HC_vs_MS.NoTrt_B |
| CEACAM4 | 0.77924 | -0.2674 | 0.097 | 0.1  | 1 | HC_vs_MS.NoTrt_B |
| TCEB3   | 0.77966 | 0.55162 | 0.094 | 0.1  | 1 | HC_vs_MS.NoTrt_B |
| NAA16   | 0.77975 | 0.26098 | 0.406 | 0.43 | 1 | HC_vs_MS.NoTrt_B |
| TNS2    | 0.77995 | 0.52858 | 0.291 | 0.31 | 1 | HC_vs_MS.NoTrt_B |
| ZNF625  | 0.78006 | -0.4276 | 0.243 | 0.25 | 1 | HC_vs_MS.NoTrt_B |
| TMEM119 | 0.78052 | -0.3904 | 0.555 | 0.57 | 1 | HC_vs_MS.NoTrt_B |
| APEX2   | 0.78109 | 0.53592 | 0.307 | 0.32 | 1 | HC_vs_MS.NoTrt_B |
| TNKS    | 0.78154 | 0.26188 | 0.797 | 0.82 | 1 | HC_vs_MS.NoTrt_B |
| CENPH   | 0.78231 | -0.2659 | 0.249 | 0.25 | 1 | HC_vs_MS.NoTrt_B |
| SLC22A5 | 0.78272 | 0.85893 | 0.375 | 0.41 | 1 | HC_vs_MS.NoTrt_B |
| HIGD1A  | 0.78273 | 0.31138 | 0.148 | 0.16 | 1 | HC_vs_MS.NoTrt_B |
| MYO1B   | 0.78273 | 0.25416 | 0.393 | 0.41 | 1 | HC_vs_MS.NoTrt_B |
| POGK    | 0.78437 | 0.60192 | 0.265 | 0.26 | 1 | HC_vs_MS.NoTrt_B |
| CDK2AP2 | 0.78441 | 0.35369 | 0.199 | 0.22 | 1 | HC_vs_MS.NoTrt_B |
| DDX52   | 0.78516 | -0.4938 | 0.871 | 0.87 | 1 | HC_vs_MS.NoTrt_B |
| HJURP   | 0.78614 | -0.5954 | 0.37  | 0.39 | 1 | HC_vs_MS.NoTrt_B |
| RNASEL  | 0.78654 | 0.74181 | 0.338 | 0.37 | 1 | HC_vs_MS.NoTrt_B |
| NEK7    | 0.78726 | 0.59013 | 0.12  | 0.11 | 1 | HC_vs_MS.NoTrt_B |
| KANSL1  | 0.78776 | 0.43002 | 0.707 | 0.73 | 1 | HC_vs_MS.NoTrt_B |
| ZNF107  | 0.78851 | 0.89062 | 0.41  | 0.42 | 1 | HC_vs_MS.NoTrt_B |
| LYL1    | 0.78917 | 0.31277 | 0.397 | 0.43 | 1 | HC_vs_MS.NoTrt_B |
| ZMYM6   | 0.79008 | 0.34348 | 0.814 | 0.89 | 1 | HC_vs_MS.NoTrt_B |
| FOXRED1 | 0.79018 | 0.29566 | 0.507 | 0.51 | 1 | HC_vs_MS.NoTrt_B |
| CAMKK2  | 0.79068 | 0.94105 | 0.465 | 0.51 | 1 | HC_vs_MS.NoTrt_B |
| PHYKPL  | 0.79141 | 0.32476 | 0.425 | 0.44 | 1 | HC_vs_MS.NoTrt_B |
| SIKE1   | 0.79204 | 0.44473 | 0.394 | 0.39 | 1 | HC_vs_MS.NoTrt_B |

|           |         |         |       |      |   |                  |
|-----------|---------|---------|-------|------|---|------------------|
| COX10     | 0.79235 | 0.49328 | 0.11  | 0.12 | 1 | HC_vs_MS.NoTrt_B |
| SYVN1     | 0.79424 | 0.31534 | 0.229 | 0.23 | 1 | HC_vs_MS.NoTrt_B |
| PTRH2     | 0.79452 | 0.98649 | 0.132 | 0.12 | 1 | HC_vs_MS.NoTrt_B |
| GBAS      | 0.79545 | 0.45788 | 0.691 | 0.71 | 1 | HC_vs_MS.NoTrt_B |
| DIMT1     | 0.79566 | 0.38666 | 0.174 | 0.17 | 1 | HC_vs_MS.NoTrt_B |
| PEX1      | 0.79623 | 0.32533 | 0.67  | 0.71 | 1 | HC_vs_MS.NoTrt_B |
| MPP6      | 0.79637 | 0.52007 | 0.278 | 0.3  | 1 | HC_vs_MS.NoTrt_B |
| HLX       | 0.79661 | 0.2946  | 0.193 | 0.21 | 1 | HC_vs_MS.NoTrt_B |
| CPD       | 0.79762 | 0.60545 | 0.693 | 0.74 | 1 | HC_vs_MS.NoTrt_B |
| EXD1      | 0.79791 | 0.3615  | 0.472 | 0.51 | 1 | HC_vs_MS.NoTrt_B |
| TNFAIP8L1 | 0.79821 | -0.4159 | 0.797 | 0.8  | 1 | HC_vs_MS.NoTrt_B |
| NARFL     | 0.79848 | 0.40092 | 0.762 | 0.78 | 1 | HC_vs_MS.NoTrt_B |
| MIGA1     | 0.79863 | 0.42686 | 0.413 | 0.45 | 1 | HC_vs_MS.NoTrt_B |
| TTC33     | 0.79926 | 0.29729 | 0.228 | 0.22 | 1 | HC_vs_MS.NoTrt_B |
| PITPNC1   | 0.79972 | 0.47554 | 0.212 | 0.2  | 1 | HC_vs_MS.NoTrt_B |
| TG        | 0.80006 | 0.42237 | 0.093 | 0.1  | 1 | HC_vs_MS.NoTrt_B |
| NOP2      | 0.8001  | 0.62898 | 0.381 | 0.38 | 1 | HC_vs_MS.NoTrt_B |
| SPG11     | 0.80033 | 0.36587 | 0.807 | 0.84 | 1 | HC_vs_MS.NoTrt_B |
| UHRF2     | 0.80039 | 0.77254 | 0.251 | 0.25 | 1 | HC_vs_MS.NoTrt_B |
| UBA6      | 0.80045 | 0.44035 | 0.491 | 0.49 | 1 | HC_vs_MS.NoTrt_B |
| PIK3CG    | 0.80068 | 1.12233 | 0.238 | 0.23 | 1 | HC_vs_MS.NoTrt_B |
| PRIM1     | 0.80092 | 0.2931  | 0.143 | 0.15 | 1 | HC_vs_MS.NoTrt_B |
| CD69      | 0.80107 | 0.37391 | 0.174 | 0.18 | 1 | HC_vs_MS.NoTrt_B |
| ARHGEF38  | 0.80115 | 0.414   | 0.361 | 0.39 | 1 | HC_vs_MS.NoTrt_B |
| SEPN1     | 0.80116 | 0.42952 | 0.351 | 0.36 | 1 | HC_vs_MS.NoTrt_B |
| TPRA1     | 0.80143 | 0.50936 | 0.152 | 0.16 | 1 | HC_vs_MS.NoTrt_B |
| CA14      | 0.80184 | 0.27619 | 0.572 | 0.59 | 1 | HC_vs_MS.NoTrt_B |
| TPRG1     | 0.80199 | -0.2895 | 0.18  | 0.19 | 1 | HC_vs_MS.NoTrt_B |
| GMPPB     | 0.80203 | 0.26332 | 0.41  | 0.41 | 1 | HC_vs_MS.NoTrt_B |
| HNRNPM    | 0.80204 | 0.42423 | 0.274 | 0.3  | 1 | HC_vs_MS.NoTrt_B |
| ADAM28    | 0.80209 | 0.25961 | 0.135 | 0.13 | 1 | HC_vs_MS.NoTrt_B |
| MCOLN3    | 0.80211 | 0.36533 | 0.467 | 0.5  | 1 | HC_vs_MS.NoTrt_B |
| COG3      | 0.80287 | 0.61002 | 0.168 | 0.18 | 1 | HC_vs_MS.NoTrt_B |
| THAP5     | 0.80303 | 0.34583 | 0.87  | 0.89 | 1 | HC_vs_MS.NoTrt_B |
| IL5RA     | 0.80346 | 1.29479 | 0.252 | 0.27 | 1 | HC_vs_MS.NoTrt_B |
| ECHDC3    | 0.80403 | 0.72035 | 0.109 | 0.1  | 1 | HC_vs_MS.NoTrt_B |
| IMPAD1    | 0.80438 | 0.47894 | 0.472 | 0.49 | 1 | HC_vs_MS.NoTrt_B |
| FBXW4     | 0.80482 | 0.44094 | 0.493 | 0.55 | 1 | HC_vs_MS.NoTrt_B |
| TBCEL     | 0.8055  | 0.68415 | 0.116 | 0.11 | 1 | HC_vs_MS.NoTrt_B |
| CR1       | 0.80663 | 0.45159 | 0.51  | 0.55 | 1 | HC_vs_MS.NoTrt_B |

|           |         |         |       |      |   |                  |
|-----------|---------|---------|-------|------|---|------------------|
| HEBP1     | 0.80665 | 0.40994 | 0.262 | 0.27 | 1 | HC_vs_MS.NoTrt_B |
| SH2D6     | 0.80674 | 0.33371 | 0.417 | 0.43 | 1 | HC_vs_MS.NoTrt_B |
| ANKRD20A3 | 0.80727 | 0.36184 | 0.112 | 0.12 | 1 | HC_vs_MS.NoTrt_B |
| WSB2      | 0.80757 | 0.56597 | 0.767 | 0.81 | 1 | HC_vs_MS.NoTrt_B |
| IFI27L2   | 0.8077  | 0.35466 | 0.142 | 0.15 | 1 | HC_vs_MS.NoTrt_B |
| IL23R     | 0.80781 | 0.66969 | 0.343 | 0.36 | 1 | HC_vs_MS.NoTrt_B |
| ZBTB16    | 0.80801 | 0.46895 | 0.372 | 0.4  | 1 | HC_vs_MS.NoTrt_B |
| MRPL27    | 0.80841 | 0.66377 | 0.155 | 0.17 | 1 | HC_vs_MS.NoTrt_B |
| FAM47E    | 0.80852 | 0.31788 | 0.642 | 0.69 | 1 | HC_vs_MS.NoTrt_B |
| ENTPD1    | 0.8088  | -0.3258 | 0.961 | 0.97 | 1 | HC_vs_MS.NoTrt_B |
| GTF2F2    | 0.80901 | 0.51726 | 0.204 | 0.2  | 1 | HC_vs_MS.NoTrt_B |
| GALNT2    | 0.80946 | 0.3956  | 0.187 | 0.18 | 1 | HC_vs_MS.NoTrt_B |
| PRODH     | 0.80954 | 0.85993 | 0.386 | 0.42 | 1 | HC_vs_MS.NoTrt_B |
| GSPT1     | 0.81035 | 0.28471 | 0.522 | 0.56 | 1 | HC_vs_MS.NoTrt_B |
| VPS50     | 0.81079 | 0.3859  | 0.526 | 0.54 | 1 | HC_vs_MS.NoTrt_B |
| LRBA      | 0.811   | 0.34379 | 0.477 | 0.49 | 1 | HC_vs_MS.NoTrt_B |
| TIAM1     | 0.81154 | 0.26069 | 0.539 | 0.56 | 1 | HC_vs_MS.NoTrt_B |
| THBS1     | 0.81168 | 0.54743 | 0.209 | 0.22 | 1 | HC_vs_MS.NoTrt_B |
| NDUFA8    | 0.81169 | 0.50434 | 0.1   | 0.11 | 1 | HC_vs_MS.NoTrt_B |
| NPL       | 0.81186 | 0.64273 | 0.223 | 0.24 | 1 | HC_vs_MS.NoTrt_B |
| C1orf123  | 0.8126  | 0.37646 | 0.119 | 0.11 | 1 | HC_vs_MS.NoTrt_B |
| MOB1B     | 0.81264 | 0.3143  | 0.61  | 0.62 | 1 | HC_vs_MS.NoTrt_B |
| SETD6     | 0.81329 | -0.3024 | 0.436 | 0.45 | 1 | HC_vs_MS.NoTrt_B |
| COA5      | 0.81344 | 0.49195 | 0.465 | 0.49 | 1 | HC_vs_MS.NoTrt_B |
| RABL6     | 0.81441 | 0.71043 | 0.509 | 0.52 | 1 | HC_vs_MS.NoTrt_B |
| CYHR1     | 0.81477 | 0.36886 | 0.268 | 0.27 | 1 | HC_vs_MS.NoTrt_B |
| TNFSF10   | 0.81549 | 0.41875 | 0.401 | 0.41 | 1 | HC_vs_MS.NoTrt_B |
| SLC25A44  | 0.81614 | 0.30995 | 0.674 | 0.7  | 1 | HC_vs_MS.NoTrt_B |
| DOCK11    | 0.81623 | 0.41615 | 0.514 | 0.57 | 1 | HC_vs_MS.NoTrt_B |
| BIN3      | 0.8166  | 0.50102 | 0.364 | 0.37 | 1 | HC_vs_MS.NoTrt_B |
| TLCD1     | 0.81662 | 0.30343 | 0.203 | 0.2  | 1 | HC_vs_MS.NoTrt_B |
| GANAB     | 0.81689 | 0.35703 | 0.43  | 0.44 | 1 | HC_vs_MS.NoTrt_B |
| TET2      | 0.81712 | 0.82699 | 0.454 | 0.51 | 1 | HC_vs_MS.NoTrt_B |
| LEPR      | 0.81769 | 0.76228 | 0.283 | 0.3  | 1 | HC_vs_MS.NoTrt_B |
| PRKCA     | 0.81812 | -0.4714 | 0.739 | 0.78 | 1 | HC_vs_MS.NoTrt_B |
| BTG1      | 0.81842 | 0.33796 | 0.599 | 0.63 | 1 | HC_vs_MS.NoTrt_B |
| THG1L     | 0.81891 | -0.4798 | 0.551 | 0.57 | 1 | HC_vs_MS.NoTrt_B |
| MRPL35    | 0.81916 | 0.68518 | 0.106 | 0.1  | 1 | HC_vs_MS.NoTrt_B |
| DDX3X     | 0.81932 | 0.25004 | 0.329 | 0.32 | 1 | HC_vs_MS.NoTrt_B |
| PTPN12    | 0.81948 | 0.43175 | 0.717 | 0.82 | 1 | HC_vs_MS.NoTrt_B |

|          |         |         |       |      |   |                  |
|----------|---------|---------|-------|------|---|------------------|
| MECR     | 0.8204  | -1.2073 | 0.306 | 0.3  | 1 | HC_vs_MS.NoTrt_B |
| INPP5F   | 0.82047 | 1.13999 | 0.307 | 0.32 | 1 | HC_vs_MS.NoTrt_B |
| HEXDC    | 0.82068 | -0.2609 | 0.338 | 0.34 | 1 | HC_vs_MS.NoTrt_B |
| NME4     | 0.821   | 0.60871 | 0.116 | 0.12 | 1 | HC_vs_MS.NoTrt_B |
| LPGAT1   | 0.82113 | -0.5016 | 0.446 | 0.47 | 1 | HC_vs_MS.NoTrt_B |
| STK24    | 0.8212  | 0.38775 | 0.254 | 0.27 | 1 | HC_vs_MS.NoTrt_B |
| MKNK2    | 0.82121 | 0.28878 | 0.199 | 0.21 | 1 | HC_vs_MS.NoTrt_B |
| DDX49    | 0.82208 | -0.5636 | 0.135 | 0.14 | 1 | HC_vs_MS.NoTrt_B |
| KLF8     | 0.82216 | -0.5017 | 0.726 | 0.72 | 1 | HC_vs_MS.NoTrt_B |
| NUP133   | 0.82241 | 0.54557 | 0.499 | 0.54 | 1 | HC_vs_MS.NoTrt_B |
| ARFGEF2  | 0.82265 | 0.78181 | 0.458 | 0.48 | 1 | HC_vs_MS.NoTrt_B |
| NCOA6    | 0.82275 | 0.59392 | 0.671 | 0.69 | 1 | HC_vs_MS.NoTrt_B |
| NHLRC1   | 0.82275 | -0.6518 | 0.233 | 0.23 | 1 | HC_vs_MS.NoTrt_B |
| RNF215   | 0.82278 | 0.36121 | 0.432 | 0.44 | 1 | HC_vs_MS.NoTrt_B |
| FDX1     | 0.82328 | 0.57806 | 0.287 | 0.29 | 1 | HC_vs_MS.NoTrt_B |
| SYNJ2BP  | 0.82388 | 0.27178 | 0.823 | 0.82 | 1 | HC_vs_MS.NoTrt_B |
| KRBOX4   | 0.82431 | 0.38511 | 0.525 | 0.55 | 1 | HC_vs_MS.NoTrt_B |
| PEX7     | 0.82462 | -0.3257 | 0.141 | 0.15 | 1 | HC_vs_MS.NoTrt_B |
| PRR14L   | 0.82481 | 0.43763 | 0.401 | 0.42 | 1 | HC_vs_MS.NoTrt_B |
| FSD2     | 0.82548 | 0.40433 | 0.452 | 0.49 | 1 | HC_vs_MS.NoTrt_B |
| ELK3     | 0.82576 | 0.39042 | 0.393 | 0.4  | 1 | HC_vs_MS.NoTrt_B |
| ABHD18   | 0.82593 | 0.27016 | 0.833 | 0.87 | 1 | HC_vs_MS.NoTrt_B |
| TTBK2    | 0.82604 | 0.27043 | 0.493 | 0.5  | 1 | HC_vs_MS.NoTrt_B |
| DNPEP    | 0.82626 | 0.28441 | 0.448 | 0.47 | 1 | HC_vs_MS.NoTrt_B |
| CLEC2B   | 0.8278  | 0.6257  | 0.209 | 0.22 | 1 | HC_vs_MS.NoTrt_B |
| WFDC11   | 0.82783 | 0.25426 | 0.196 | 0.21 | 1 | HC_vs_MS.NoTrt_B |
| PABPC1L  | 0.82788 | 0.49833 | 0.284 | 0.31 | 1 | HC_vs_MS.NoTrt_B |
| AMPD3    | 0.82799 | -0.2639 | 0.43  | 0.45 | 1 | HC_vs_MS.NoTrt_B |
| ANKRD9   | 0.82868 | 0.42792 | 0.47  | 0.51 | 1 | HC_vs_MS.NoTrt_B |
| ARHGAP21 | 0.82885 | 0.63835 | 0.296 | 0.3  | 1 | HC_vs_MS.NoTrt_B |
| ADPRHL1  | 0.82935 | 0.27648 | 0.235 | 0.25 | 1 | HC_vs_MS.NoTrt_B |
| STK38L   | 0.82937 | -0.2631 | 0.684 | 0.7  | 1 | HC_vs_MS.NoTrt_B |
| DNAH6    | 0.82943 | 0.61101 | 0.168 | 0.16 | 1 | HC_vs_MS.NoTrt_B |
| FAM126A  | 0.83038 | 0.83418 | 0.661 | 0.73 | 1 | HC_vs_MS.NoTrt_B |
| CEP162   | 0.83041 | -0.84   | 0.138 | 0.13 | 1 | HC_vs_MS.NoTrt_B |
| TRPT1    | 0.83113 | 0.43739 | 0.096 | 0.1  | 1 | HC_vs_MS.NoTrt_B |
| SAMM50   | 0.83155 | -0.3919 | 0.483 | 0.48 | 1 | HC_vs_MS.NoTrt_B |
| RLF      | 0.83201 | 0.55028 | 0.168 | 0.16 | 1 | HC_vs_MS.NoTrt_B |
| SLC25A35 | 0.83254 | -0.3971 | 0.142 | 0.14 | 1 | HC_vs_MS.NoTrt_B |
| LCAT     | 0.83306 | -0.2561 | 0.187 | 0.2  | 1 | HC_vs_MS.NoTrt_B |

|          |         |         |       |      |   |                  |
|----------|---------|---------|-------|------|---|------------------|
| DNAJC21  | 0.83334 | 0.75382 | 0.381 | 0.4  | 1 | HC_vs_MS.NoTrt_B |
| TRIM61   | 0.83458 | -0.2564 | 0.214 | 0.21 | 1 | HC_vs_MS.NoTrt_B |
| GALNT15  | 0.83479 | 0.90424 | 0.271 | 0.28 | 1 | HC_vs_MS.NoTrt_B |
| ZKSCAN3  | 0.83479 | 0.39357 | 0.807 | 0.84 | 1 | HC_vs_MS.NoTrt_B |
| APOBEC3D | 0.83486 | -0.3726 | 0.612 | 0.6  | 1 | HC_vs_MS.NoTrt_B |
| KRBA2    | 0.83511 | 1.1211  | 0.37  | 0.41 | 1 | HC_vs_MS.NoTrt_B |
| RASA1    | 0.83532 | 0.67511 | 0.209 | 0.22 | 1 | HC_vs_MS.NoTrt_B |
| PTPRH    | 0.83533 | -0.3533 | 0.125 | 0.12 | 1 | HC_vs_MS.NoTrt_B |
| PUM2     | 0.83552 | 0.43505 | 0.33  | 0.36 | 1 | HC_vs_MS.NoTrt_B |
| SDHAF2   | 0.8365  | 0.30642 | 0.223 | 0.24 | 1 | HC_vs_MS.NoTrt_B |
| ZNHIT6   | 0.8367  | 0.37655 | 0.393 | 0.38 | 1 | HC_vs_MS.NoTrt_B |
| DNAJC4   | 0.83675 | 0.57893 | 0.117 | 0.11 | 1 | HC_vs_MS.NoTrt_B |
| GLS      | 0.83694 | 0.64292 | 0.628 | 0.64 | 1 | HC_vs_MS.NoTrt_B |
| EFR3A    | 0.83764 | 0.38895 | 0.135 | 0.13 | 1 | HC_vs_MS.NoTrt_B |
| GRK3     | 0.83816 | -0.2609 | 0.333 | 0.34 | 1 | HC_vs_MS.NoTrt_B |
| RBM43    | 0.83839 | 0.28355 | 0.59  | 0.68 | 1 | HC_vs_MS.NoTrt_B |
| STMN1    | 0.8388  | -0.3528 | 0.691 | 0.7  | 1 | HC_vs_MS.NoTrt_B |
| LPP      | 0.83887 | 0.29221 | 0.971 | 0.95 | 1 | HC_vs_MS.NoTrt_B |
| PPAN     | 0.83902 | 1.03863 | 0.368 | 0.39 | 1 | HC_vs_MS.NoTrt_B |
| SAP130   | 0.83918 | 0.64915 | 0.158 | 0.16 | 1 | HC_vs_MS.NoTrt_B |
| TTC34    | 0.83946 | 0.97058 | 0.193 | 0.21 | 1 | HC_vs_MS.NoTrt_B |
| ETNK1    | 0.83989 | 0.45688 | 0.494 | 0.57 | 1 | HC_vs_MS.NoTrt_B |
| UHMK1    | 0.84036 | 0.48559 | 0.238 | 0.25 | 1 | HC_vs_MS.NoTrt_B |
| RAD51B   | 0.84098 | 0.93871 | 0.287 | 0.29 | 1 | HC_vs_MS.NoTrt_B |
| TSC22D2  | 0.84099 | 0.82023 | 0.372 | 0.38 | 1 | HC_vs_MS.NoTrt_B |
| TMEM53   | 0.84134 | 1.02397 | 0.314 | 0.34 | 1 | HC_vs_MS.NoTrt_B |
| APBB3    | 0.84136 | 0.26079 | 0.123 | 0.13 | 1 | HC_vs_MS.NoTrt_B |
| LRRC8A   | 0.84165 | -0.3027 | 0.104 | 0.1  | 1 | HC_vs_MS.NoTrt_B |
| KATNAL1  | 0.84189 | -0.8776 | 0.523 | 0.5  | 1 | HC_vs_MS.NoTrt_B |
| PRPSAP1  | 0.84228 | -0.4713 | 0.714 | 0.71 | 1 | HC_vs_MS.NoTrt_B |
| CEP97    | 0.8423  | 0.72644 | 0.628 | 0.65 | 1 | HC_vs_MS.NoTrt_B |
| SLC35E2  | 0.84236 | 0.28035 | 0.464 | 0.45 | 1 | HC_vs_MS.NoTrt_B |
| CXADR    | 0.84306 | 0.33175 | 0.281 | 0.27 | 1 | HC_vs_MS.NoTrt_B |
| RAB5B    | 0.84369 | 0.33293 | 0.864 | 0.92 | 1 | HC_vs_MS.NoTrt_B |
| MAN1A2   | 0.84404 | 0.47228 | 0.248 | 0.24 | 1 | HC_vs_MS.NoTrt_B |
| PRSS53   | 0.84423 | 0.26058 | 0.162 | 0.17 | 1 | HC_vs_MS.NoTrt_B |
| PNPO     | 0.84446 | -0.4321 | 0.584 | 0.61 | 1 | HC_vs_MS.NoTrt_B |
| KAT6B    | 0.84465 | 0.5096  | 0.106 | 0.11 | 1 | HC_vs_MS.NoTrt_B |
| MBD3     | 0.84476 | 0.55197 | 0.733 | 0.8  | 1 | HC_vs_MS.NoTrt_B |
| SPEN     | 0.84526 | 0.3853  | 0.283 | 0.28 | 1 | HC_vs_MS.NoTrt_B |

|          |         |         |       |      |   |                  |
|----------|---------|---------|-------|------|---|------------------|
| RRP1B    | 0.84556 | 0.39471 | 0.199 | 0.2  | 1 | HC_vs_MS.NoTrt_B |
| OAS2     | 0.8456  | 0.3475  | 0.213 | 0.22 | 1 | HC_vs_MS.NoTrt_B |
| PPIL4    | 0.84561 | 0.55927 | 0.223 | 0.22 | 1 | HC_vs_MS.NoTrt_B |
| KEAP1    | 0.84576 | -0.4156 | 0.448 | 0.43 | 1 | HC_vs_MS.NoTrt_B |
| IRF7     | 0.8458  | 0.44462 | 0.112 | 0.12 | 1 | HC_vs_MS.NoTrt_B |
| SH2D3C   | 0.84601 | 0.42882 | 0.2   | 0.21 | 1 | HC_vs_MS.NoTrt_B |
| CREBBP   | 0.84601 | 0.31253 | 0.564 | 0.61 | 1 | HC_vs_MS.NoTrt_B |
| ZNF213   | 0.84603 | 0.59952 | 0.455 | 0.48 | 1 | HC_vs_MS.NoTrt_B |
| PPP1R12B | 0.84703 | 0.47192 | 0.696 | 0.68 | 1 | HC_vs_MS.NoTrt_B |
| CAPN7    | 0.84727 | 0.26897 | 0.552 | 0.58 | 1 | HC_vs_MS.NoTrt_B |
| NPIPA5   | 0.84742 | 0.37793 | 0.101 | 0.1  | 1 | HC_vs_MS.NoTrt_B |
| C9orf131 | 0.84749 | 0.79798 | 0.148 | 0.15 | 1 | HC_vs_MS.NoTrt_B |
| RPP30    | 0.84813 | 0.42456 | 0.604 | 0.65 | 1 | HC_vs_MS.NoTrt_B |
| SLC35G1  | 0.84891 | 0.25824 | 0.146 | 0.15 | 1 | HC_vs_MS.NoTrt_B |
| AGO1     | 0.84893 | 0.27313 | 0.439 | 0.43 | 1 | HC_vs_MS.NoTrt_B |
| QKI      | 0.84914 | -0.3711 | 0.386 | 0.39 | 1 | HC_vs_MS.NoTrt_B |
| ARAP2    | 0.84932 | 0.28222 | 0.265 | 0.27 | 1 | HC_vs_MS.NoTrt_B |
| KLHDC4   | 0.84988 | 0.44657 | 0.706 | 0.7  | 1 | HC_vs_MS.NoTrt_B |
| ANKFY1   | 0.85042 | 0.69001 | 0.617 | 0.71 | 1 | HC_vs_MS.NoTrt_B |
| UGCG     | 0.85064 | 0.55419 | 0.178 | 0.17 | 1 | HC_vs_MS.NoTrt_B |
| DLG5     | 0.85075 | 0.35254 | 0.429 | 0.45 | 1 | HC_vs_MS.NoTrt_B |
| ALMS1    | 0.85139 | 0.43765 | 0.461 | 0.46 | 1 | HC_vs_MS.NoTrt_B |
| CCDC138  | 0.8524  | 0.34811 | 0.157 | 0.15 | 1 | HC_vs_MS.NoTrt_B |
| TMEM260  | 0.85244 | 0.44757 | 0.4   | 0.43 | 1 | HC_vs_MS.NoTrt_B |
| ALG13    | 0.85253 | 0.68042 | 0.284 | 0.3  | 1 | HC_vs_MS.NoTrt_B |
| WDR48    | 0.85271 | 0.48887 | 0.129 | 0.14 | 1 | HC_vs_MS.NoTrt_B |
| CA13     | 0.85302 | 0.34262 | 0.513 | 0.54 | 1 | HC_vs_MS.NoTrt_B |
| CHST14   | 0.85306 | 0.5255  | 0.225 | 0.23 | 1 | HC_vs_MS.NoTrt_B |
| CLPX     | 0.85319 | 0.50179 | 0.683 | 0.73 | 1 | HC_vs_MS.NoTrt_B |
| PLEKHM1  | 0.85323 | 0.54786 | 0.816 | 0.87 | 1 | HC_vs_MS.NoTrt_B |
| HPCAL1   | 0.85324 | 0.27551 | 0.357 | 0.36 | 1 | HC_vs_MS.NoTrt_B |
| PLD6     | 0.85325 | 0.6304  | 0.435 | 0.46 | 1 | HC_vs_MS.NoTrt_B |
| NKIRAS1  | 0.85333 | 0.3986  | 0.239 | 0.25 | 1 | HC_vs_MS.NoTrt_B |
| TRIM58   | 0.85383 | 0.52125 | 0.564 | 0.58 | 1 | HC_vs_MS.NoTrt_B |
| OLA1     | 0.85481 | 0.26025 | 0.455 | 0.44 | 1 | HC_vs_MS.NoTrt_B |
| RAD50    | 0.85591 | 0.40121 | 0.184 | 0.19 | 1 | HC_vs_MS.NoTrt_B |
| MLH1     | 0.85603 | 0.48145 | 0.364 | 0.38 | 1 | HC_vs_MS.NoTrt_B |
| RABIF    | 0.85605 | 0.5981  | 0.364 | 0.37 | 1 | HC_vs_MS.NoTrt_B |
| C11orf63 | 0.85611 | 0.34    | 0.42  | 0.47 | 1 | HC_vs_MS.NoTrt_B |
| TBCCD1   | 0.85749 | 0.48686 | 0.275 | 0.28 | 1 | HC_vs_MS.NoTrt_B |

|            |         |         |       |      |   |                  |
|------------|---------|---------|-------|------|---|------------------|
| THNSL1     | 0.85756 | 0.6479  | 0.096 | 0.1  | 1 | HC_vs_MS.NoTrt_B |
| ZBTB4      | 0.85758 | 0.78209 | 0.126 | 0.12 | 1 | HC_vs_MS.NoTrt_B |
| DDX56      | 0.8578  | 0.46652 | 0.217 | 0.23 | 1 | HC_vs_MS.NoTrt_B |
| FAM91A1    | 0.85809 | 0.49832 | 0.299 | 0.32 | 1 | HC_vs_MS.NoTrt_B |
| PPP3R1     | 0.85839 | 1.09571 | 0.158 | 0.16 | 1 | HC_vs_MS.NoTrt_B |
| CEP55      | 0.85856 | -0.702  | 0.126 | 0.13 | 1 | HC_vs_MS.NoTrt_B |
| FAM65C     | 0.85895 | 0.37381 | 0.326 | 0.34 | 1 | HC_vs_MS.NoTrt_B |
| MAP2K5     | 0.85914 | 0.41346 | 0.103 | 0.11 | 1 | HC_vs_MS.NoTrt_B |
| METTL21B   | 0.85917 | 0.73303 | 0.448 | 0.47 | 1 | HC_vs_MS.NoTrt_B |
| AL589743.1 | 0.85981 | -0.2959 | 0.519 | 0.55 | 1 | HC_vs_MS.NoTrt_B |
| SNRNP48    | 0.86    | 0.43034 | 0.207 | 0.21 | 1 | HC_vs_MS.NoTrt_B |
| SHPK       | 0.86049 | -0.916  | 0.401 | 0.42 | 1 | HC_vs_MS.NoTrt_B |
| ZNF142     | 0.86065 | 0.26476 | 0.101 | 0.11 | 1 | HC_vs_MS.NoTrt_B |
| FBLN5      | 0.86068 | 0.45844 | 0.148 | 0.16 | 1 | HC_vs_MS.NoTrt_B |
| RAB2A      | 0.86083 | 0.40829 | 0.214 | 0.23 | 1 | HC_vs_MS.NoTrt_B |
| ZNF749     | 0.86126 | 1.02026 | 0.38  | 0.41 | 1 | HC_vs_MS.NoTrt_B |
| STARD4     | 0.86154 | 0.29685 | 0.143 | 0.15 | 1 | HC_vs_MS.NoTrt_B |
| LIN54      | 0.8616  | 1.31616 | 0.548 | 0.63 | 1 | HC_vs_MS.NoTrt_B |
| CDC42EP3   | 0.86178 | 0.45722 | 0.461 | 0.49 | 1 | HC_vs_MS.NoTrt_B |
| GRM4       | 0.86244 | 0.27876 | 0.22  | 0.22 | 1 | HC_vs_MS.NoTrt_B |
| ARL1       | 0.86267 | 0.46703 | 0.346 | 0.35 | 1 | HC_vs_MS.NoTrt_B |
| ATXN7L3B   | 0.86285 | 0.77787 | 0.162 | 0.17 | 1 | HC_vs_MS.NoTrt_B |
| GINS2      | 0.86286 | 0.86052 | 0.3   | 0.31 | 1 | HC_vs_MS.NoTrt_B |
| PGA3       | 0.86312 | 0.42397 | 0.291 | 0.3  | 1 | HC_vs_MS.NoTrt_B |
| AC013264.1 | 0.86342 | 0.7503  | 0.336 | 0.35 | 1 | HC_vs_MS.NoTrt_B |
| MNT        | 0.86388 | 0.55077 | 0.623 | 0.7  | 1 | HC_vs_MS.NoTrt_B |
| LZIC       | 0.86419 | 0.30152 | 0.788 | 0.85 | 1 | HC_vs_MS.NoTrt_B |
| INHBE      | 0.86484 | 0.27088 | 0.364 | 0.39 | 1 | HC_vs_MS.NoTrt_B |
| BRCA2      | 0.86513 | 0.4995  | 0.358 | 0.38 | 1 | HC_vs_MS.NoTrt_B |
| TRIM68     | 0.86517 | -0.8748 | 0.509 | 0.54 | 1 | HC_vs_MS.NoTrt_B |
| GCKR       | 0.86527 | 0.45401 | 0.139 | 0.15 | 1 | HC_vs_MS.NoTrt_B |
| AP4M1      | 0.86569 | -0.4988 | 0.538 | 0.61 | 1 | HC_vs_MS.NoTrt_B |
| SDCBP      | 0.86598 | 0.43327 | 0.203 | 0.2  | 1 | HC_vs_MS.NoTrt_B |
| DLK2       | 0.86634 | 0.27711 | 0.312 | 0.32 | 1 | HC_vs_MS.NoTrt_B |
| MYCBP2     | 0.86666 | 0.69105 | 0.413 | 0.43 | 1 | HC_vs_MS.NoTrt_B |
| PAPOLG     | 0.86677 | 0.35842 | 0.733 | 0.78 | 1 | HC_vs_MS.NoTrt_B |
| FAM149A    | 0.86794 | -0.2562 | 0.306 | 0.3  | 1 | HC_vs_MS.NoTrt_B |
| MRPL10     | 0.86795 | -0.7189 | 0.4   | 0.39 | 1 | HC_vs_MS.NoTrt_B |
| GCNT1      | 0.86866 | 1.41795 | 0.249 | 0.27 | 1 | HC_vs_MS.NoTrt_B |
| CTSA       | 0.86905 | -0.3317 | 0.659 | 0.65 | 1 | HC_vs_MS.NoTrt_B |



|            |         |         |       |      |   |                  |
|------------|---------|---------|-------|------|---|------------------|
| SPECC1L-AD | 0.86912 | 0.39749 | 0.187 | 0.18 | 1 | HC_vs_MS.NoTrt_B |
| KRT15      | 0.86919 | 0.29971 | 0.417 | 0.43 | 1 | HC_vs_MS.NoTrt_B |
| SGF29      | 0.86922 | -0.3481 | 0.271 | 0.26 | 1 | HC_vs_MS.NoTrt_B |
| RNF145     | 0.86937 | 0.70622 | 0.157 | 0.16 | 1 | HC_vs_MS.NoTrt_B |
| FAM168B    | 0.86998 | 0.63277 | 0.106 | 0.1  | 1 | HC_vs_MS.NoTrt_B |
| AVL9       | 0.87007 | 0.38251 | 0.894 | 0.92 | 1 | HC_vs_MS.NoTrt_B |
| EFCAB3     | 0.87026 | 0.38765 | 0.522 | 0.61 | 1 | HC_vs_MS.NoTrt_B |
| DCTN6      | 0.8707  | -0.3365 | 0.519 | 0.55 | 1 | HC_vs_MS.NoTrt_B |
| SULF2      | 0.87087 | 0.31527 | 0.149 | 0.15 | 1 | HC_vs_MS.NoTrt_B |
| SLC23A3    | 0.8714  | -0.2526 | 0.41  | 0.42 | 1 | HC_vs_MS.NoTrt_B |
| NBPF1      | 0.87145 | 1.10302 | 0.229 | 0.25 | 1 | HC_vs_MS.NoTrt_B |
| KLHL2      | 0.87161 | 0.63796 | 0.323 | 0.34 | 1 | HC_vs_MS.NoTrt_B |
| RNF24      | 0.87165 | -0.281  | 0.545 | 0.56 | 1 | HC_vs_MS.NoTrt_B |
| VNN2       | 0.87179 | 0.34852 | 0.158 | 0.15 | 1 | HC_vs_MS.NoTrt_B |
| CTPS1      | 0.87189 | -0.4762 | 0.609 | 0.62 | 1 | HC_vs_MS.NoTrt_B |
| CHERP      | 0.87213 | 0.32892 | 0.145 | 0.15 | 1 | HC_vs_MS.NoTrt_B |
| ESAM       | 0.87214 | 0.64592 | 0.109 | 0.11 | 1 | HC_vs_MS.NoTrt_B |
| GDPD5      | 0.87232 | 0.30943 | 0.267 | 0.27 | 1 | HC_vs_MS.NoTrt_B |
| BTG2       | 0.8725  | 0.25041 | 0.178 | 0.17 | 1 | HC_vs_MS.NoTrt_B |
| RRP1       | 0.87355 | -0.2658 | 0.638 | 0.7  | 1 | HC_vs_MS.NoTrt_B |
| HTT        | 0.87357 | 0.65478 | 0.236 | 0.24 | 1 | HC_vs_MS.NoTrt_B |
| NCAPG2     | 0.87377 | -0.9993 | 0.159 | 0.16 | 1 | HC_vs_MS.NoTrt_B |
| ENTPD6     | 0.87386 | 0.44181 | 0.12  | 0.12 | 1 | HC_vs_MS.NoTrt_B |
| CCDC186    | 0.87448 | 0.32472 | 0.575 | 0.57 | 1 | HC_vs_MS.NoTrt_B |
| ZNF670     | 0.87522 | 0.38167 | 0.161 | 0.17 | 1 | HC_vs_MS.NoTrt_B |
| GMDS       | 0.87558 | 0.3711  | 0.112 | 0.11 | 1 | HC_vs_MS.NoTrt_B |
| GRAP       | 0.87571 | 0.40583 | 0.204 | 0.21 | 1 | HC_vs_MS.NoTrt_B |
| PDE7A      | 0.87603 | 0.61768 | 0.309 | 0.32 | 1 | HC_vs_MS.NoTrt_B |
| AP1M1      | 0.8771  | -0.2932 | 0.99  | 0.97 | 1 | HC_vs_MS.NoTrt_B |
| SP3        | 0.87722 | 0.70292 | 0.559 | 0.58 | 1 | HC_vs_MS.NoTrt_B |
| LAPTM4B    | 0.87741 | -0.5564 | 0.194 | 0.2  | 1 | HC_vs_MS.NoTrt_B |
| AGTPBP1    | 0.87748 | 0.6073  | 0.172 | 0.17 | 1 | HC_vs_MS.NoTrt_B |
| GFPT1      | 0.87758 | 0.40401 | 0.706 | 0.74 | 1 | HC_vs_MS.NoTrt_B |
| ZNF227     | 0.87763 | 0.56805 | 0.465 | 0.5  | 1 | HC_vs_MS.NoTrt_B |
| CEP104     | 0.87806 | 0.29676 | 0.652 | 0.65 | 1 | HC_vs_MS.NoTrt_B |
| DPH6       | 0.87811 | 0.5897  | 0.409 | 0.44 | 1 | HC_vs_MS.NoTrt_B |
| INPP4B     | 0.87814 | 0.27342 | 0.504 | 0.5  | 1 | HC_vs_MS.NoTrt_B |
| NAT10      | 0.87844 | -0.408  | 0.354 | 0.36 | 1 | HC_vs_MS.NoTrt_B |
| NTMT1      | 0.87855 | 0.6832  | 0.214 | 0.22 | 1 | HC_vs_MS.NoTrt_B |
| LIG3       | 0.87856 | 0.39043 | 0.33  | 0.33 | 1 | HC_vs_MS.NoTrt_B |

|          |         |         |       |      |   |                  |
|----------|---------|---------|-------|------|---|------------------|
| FIBP     | 0.87876 | -0.2866 | 0.509 | 0.51 | 1 | HC_vs_MS.NoTrt_B |
| GLUD1    | 0.87888 | 0.39697 | 0.158 | 0.16 | 1 | HC_vs_MS.NoTrt_B |
| SCAF8    | 0.87906 | 0.45486 | 0.239 | 0.25 | 1 | HC_vs_MS.NoTrt_B |
| TBC1D32  | 0.87929 | -0.3348 | 0.449 | 0.46 | 1 | HC_vs_MS.NoTrt_B |
| FAM124B  | 0.87966 | -0.3316 | 0.106 | 0.1  | 1 | HC_vs_MS.NoTrt_B |
| USP38    | 0.8804  | 0.27565 | 0.312 | 0.32 | 1 | HC_vs_MS.NoTrt_B |
| NOLC1    | 0.88081 | 0.61976 | 0.103 | 0.11 | 1 | HC_vs_MS.NoTrt_B |
| NDRG4    | 0.88083 | 0.28477 | 0.13  | 0.14 | 1 | HC_vs_MS.NoTrt_B |
| CCND3    | 0.88092 | 0.38933 | 0.516 | 0.55 | 1 | HC_vs_MS.NoTrt_B |
| NFATC2IP | 0.88093 | -0.2712 | 0.657 | 0.7  | 1 | HC_vs_MS.NoTrt_B |
| FBXO45   | 0.88151 | 0.5326  | 0.423 | 0.44 | 1 | HC_vs_MS.NoTrt_B |
| LMLN     | 0.8819  | -0.4853 | 0.435 | 0.45 | 1 | HC_vs_MS.NoTrt_B |
| SLC15A4  | 0.88193 | -0.2592 | 0.722 | 0.73 | 1 | HC_vs_MS.NoTrt_B |
| DHR SX   | 0.8824  | -0.3557 | 0.725 | 0.77 | 1 | HC_vs_MS.NoTrt_B |
| TMEM241  | 0.88243 | -0.5595 | 0.632 | 0.67 | 1 | HC_vs_MS.NoTrt_B |
| SULF1    | 0.88263 | 0.25786 | 0.174 | 0.17 | 1 | HC_vs_MS.NoTrt_B |
| C12orf40 | 0.88284 | 0.35908 | 0.288 | 0.3  | 1 | HC_vs_MS.NoTrt_B |
| MMRN2    | 0.88308 | -0.9349 | 0.152 | 0.15 | 1 | HC_vs_MS.NoTrt_B |
| IMPA1    | 0.88311 | 0.30769 | 0.336 | 0.34 | 1 | HC_vs_MS.NoTrt_B |
| CLTC     | 0.88361 | -0.3531 | 0.355 | 0.35 | 1 | HC_vs_MS.NoTrt_B |
| ATG10    | 0.88371 | 0.31408 | 0.936 | 0.94 | 1 | HC_vs_MS.NoTrt_B |
| KDM4B    | 0.88378 | 0.32663 | 0.594 | 0.6  | 1 | HC_vs_MS.NoTrt_B |
| PSMD9    | 0.8838  | -0.2938 | 0.954 | 0.98 | 1 | HC_vs_MS.NoTrt_B |
| CCDC117  | 0.88381 | 0.37639 | 0.299 | 0.31 | 1 | HC_vs_MS.NoTrt_B |
| FILIP1   | 0.88404 | 0.28471 | 0.384 | 0.41 | 1 | HC_vs_MS.NoTrt_B |
| CHI3L2   | 0.8842  | 0.4582  | 0.201 | 0.21 | 1 | HC_vs_MS.NoTrt_B |
| ATXN7L1  | 0.88438 | 0.51914 | 0.332 | 0.37 | 1 | HC_vs_MS.NoTrt_B |
| PLD2     | 0.88481 | -0.5916 | 0.107 | 0.1  | 1 | HC_vs_MS.NoTrt_B |
| SYPL1    | 0.88581 | 0.44136 | 0.383 | 0.39 | 1 | HC_vs_MS.NoTrt_B |
| MSS51    | 0.88612 | 0.39634 | 0.536 | 0.56 | 1 | HC_vs_MS.NoTrt_B |
| NPIPA1   | 0.88729 | 0.30635 | 0.683 | 0.72 | 1 | HC_vs_MS.NoTrt_B |
| TSPYL1   | 0.88732 | 0.37978 | 0.522 | 0.56 | 1 | HC_vs_MS.NoTrt_B |
| LST1     | 0.88779 | -0.3505 | 0.245 | 0.23 | 1 | HC_vs_MS.NoTrt_B |
| TCAF1    | 0.8879  | -0.4282 | 0.336 | 0.34 | 1 | HC_vs_MS.NoTrt_B |
| IQCB1    | 0.88836 | 0.88298 | 0.11  | 0.11 | 1 | HC_vs_MS.NoTrt_B |
| UBAP1L   | 0.88874 | 1.16421 | 0.355 | 0.38 | 1 | HC_vs_MS.NoTrt_B |
| G2E3     | 0.88882 | 0.42136 | 0.488 | 0.5  | 1 | HC_vs_MS.NoTrt_B |
| CPSF6    | 0.88941 | 0.83321 | 0.409 | 0.42 | 1 | HC_vs_MS.NoTrt_B |
| HERPUD2  | 0.89002 | 0.65679 | 0.481 | 0.49 | 1 | HC_vs_MS.NoTrt_B |
| MAK      | 0.89005 | 0.26048 | 0.17  | 0.17 | 1 | HC_vs_MS.NoTrt_B |

|          |         |         |       |      |   |                  |
|----------|---------|---------|-------|------|---|------------------|
| TSPOAP1  | 0.89082 | -0.4423 | 0.223 | 0.22 | 1 | HC_vs_MS.NoTrt_B |
| ZFAND3   | 0.8909  | 0.30596 | 0.642 | 0.67 | 1 | HC_vs_MS.NoTrt_B |
| PLEKHH2  | 0.89122 | 0.46338 | 0.619 | 0.68 | 1 | HC_vs_MS.NoTrt_B |
| PDPK1    | 0.89127 | 0.69393 | 0.599 | 0.62 | 1 | HC_vs_MS.NoTrt_B |
| DNAJB7   | 0.89168 | 0.45394 | 0.225 | 0.23 | 1 | HC_vs_MS.NoTrt_B |
| JUN      | 0.89174 | 0.98309 | 0.119 | 0.12 | 1 | HC_vs_MS.NoTrt_B |
| ABL2     | 0.89214 | 0.8766  | 0.787 | 0.83 | 1 | HC_vs_MS.NoTrt_B |
| PDE3B    | 0.89264 | 0.27758 | 0.591 | 0.61 | 1 | HC_vs_MS.NoTrt_B |
| GPR37L1  | 0.89305 | 0.64156 | 0.32  | 0.34 | 1 | HC_vs_MS.NoTrt_B |
| EHMT1    | 0.89403 | 0.29523 | 0.941 | 0.96 | 1 | HC_vs_MS.NoTrt_B |
| C12orf66 | 0.89408 | -0.3842 | 0.33  | 0.32 | 1 | HC_vs_MS.NoTrt_B |
| TYSND1   | 0.89461 | -0.535  | 0.257 | 0.26 | 1 | HC_vs_MS.NoTrt_B |
| FAM156A  | 0.89584 | -0.5016 | 0.165 | 0.16 | 1 | HC_vs_MS.NoTrt_B |
| AFDN     | 0.89595 | 0.3238  | 0.113 | 0.12 | 1 | HC_vs_MS.NoTrt_B |
| FYN      | 0.89622 | 0.31991 | 0.523 | 0.54 | 1 | HC_vs_MS.NoTrt_B |
| ZNF799   | 0.8966  | 0.35437 | 0.39  | 0.42 | 1 | HC_vs_MS.NoTrt_B |
| PELP1    | 0.89721 | 0.42826 | 0.226 | 0.24 | 1 | HC_vs_MS.NoTrt_B |
| CARS     | 0.89724 | -0.4324 | 0.757 | 0.75 | 1 | HC_vs_MS.NoTrt_B |
| ARPC5    | 0.89725 | 0.31192 | 0.901 | 0.94 | 1 | HC_vs_MS.NoTrt_B |
| LAMTOR3  | 0.89733 | 0.93441 | 0.325 | 0.34 | 1 | HC_vs_MS.NoTrt_B |
| FAM126B  | 0.89738 | 0.28647 | 0.87  | 0.92 | 1 | HC_vs_MS.NoTrt_B |
| ZNF600   | 0.89825 | 0.80557 | 0.142 | 0.15 | 1 | HC_vs_MS.NoTrt_B |
| NAMPT    | 0.89849 | 0.52477 | 0.687 | 0.71 | 1 | HC_vs_MS.NoTrt_B |
| NOTCH1   | 0.89966 | 0.27578 | 0.117 | 0.11 | 1 | HC_vs_MS.NoTrt_B |
| ANKRD13A | 0.89987 | 0.25853 | 0.787 | 0.81 | 1 | HC_vs_MS.NoTrt_B |
| TRIM4    | 0.89991 | 0.48339 | 0.583 | 0.62 | 1 | HC_vs_MS.NoTrt_B |
| ASXL2    | 0.90015 | 0.44185 | 0.193 | 0.2  | 1 | HC_vs_MS.NoTrt_B |
| PAXBP1   | 0.90032 | 0.59393 | 0.168 | 0.17 | 1 | HC_vs_MS.NoTrt_B |
| CHRM3    | 0.90074 | 0.43817 | 0.191 | 0.2  | 1 | HC_vs_MS.NoTrt_B |
| MCM3AP   | 0.90101 | 0.35256 | 0.529 | 0.54 | 1 | HC_vs_MS.NoTrt_B |
| ASCC3    | 0.90109 | 0.6002  | 0.275 | 0.29 | 1 | HC_vs_MS.NoTrt_B |
| ZNF135   | 0.90131 | 0.64792 | 0.432 | 0.45 | 1 | HC_vs_MS.NoTrt_B |
| MREG     | 0.90157 | 0.48844 | 0.614 | 0.69 | 1 | HC_vs_MS.NoTrt_B |
| USP15    | 0.90159 | 0.35693 | 0.822 | 0.87 | 1 | HC_vs_MS.NoTrt_B |
| CAPN10   | 0.90161 | 0.85664 | 0.462 | 0.48 | 1 | HC_vs_MS.NoTrt_B |
| CD7      | 0.90165 | 0.84553 | 0.242 | 0.25 | 1 | HC_vs_MS.NoTrt_B |
| ARF3     | 0.90227 | 0.58984 | 0.159 | 0.16 | 1 | HC_vs_MS.NoTrt_B |
| DTWD1    | 0.90258 | 0.28451 | 0.597 | 0.65 | 1 | HC_vs_MS.NoTrt_B |
| UAP1L1   | 0.90313 | -0.3303 | 0.301 | 0.3  | 1 | HC_vs_MS.NoTrt_B |
| ZNF14    | 0.90333 | 2.37971 | 0.32  | 0.34 | 1 | HC_vs_MS.NoTrt_B |

|          |         |         |       |      |   |                  |
|----------|---------|---------|-------|------|---|------------------|
| GTPBP3   | 0.90369 | -0.2726 | 0.632 | 0.65 | 1 | HC_vs_MS.NoTrt_B |
| ANKRA2   | 0.90388 | 0.467   | 0.11  | 0.11 | 1 | HC_vs_MS.NoTrt_B |
| TPP2     | 0.9042  | 0.26429 | 0.53  | 0.52 | 1 | HC_vs_MS.NoTrt_B |
| CAPN8    | 0.90443 | -0.3903 | 0.261 | 0.25 | 1 | HC_vs_MS.NoTrt_B |
| SMARCA2  | 0.90447 | 0.4388  | 0.413 | 0.43 | 1 | HC_vs_MS.NoTrt_B |
| RBBP6    | 0.90532 | 0.33331 | 0.22  | 0.23 | 1 | HC_vs_MS.NoTrt_B |
| MIEF1    | 0.90552 | -0.3898 | 0.465 | 0.44 | 1 | HC_vs_MS.NoTrt_B |
| AIFM1    | 0.90603 | -0.563  | 0.546 | 0.56 | 1 | HC_vs_MS.NoTrt_B |
| ZNF432   | 0.9061  | 0.30233 | 0.552 | 0.6  | 1 | HC_vs_MS.NoTrt_B |
| IRF5     | 0.90648 | 0.41789 | 0.377 | 0.38 | 1 | HC_vs_MS.NoTrt_B |
| ZC3HAV1L | 0.90671 | 0.27576 | 0.433 | 0.47 | 1 | HC_vs_MS.NoTrt_B |
| L3HYPDH  | 0.90691 | 0.83152 | 0.194 | 0.2  | 1 | HC_vs_MS.NoTrt_B |
| WWOX     | 0.90703 | 0.78087 | 0.236 | 0.25 | 1 | HC_vs_MS.NoTrt_B |
| SLAMF7   | 0.90719 | 0.51956 | 0.407 | 0.44 | 1 | HC_vs_MS.NoTrt_B |
| DCUN1D5  | 0.90722 | 0.36704 | 0.425 | 0.43 | 1 | HC_vs_MS.NoTrt_B |
| ENPP3    | 0.90746 | 0.82017 | 0.13  | 0.13 | 1 | HC_vs_MS.NoTrt_B |
| HIPK3    | 0.90834 | 0.29618 | 0.122 | 0.12 | 1 | HC_vs_MS.NoTrt_B |
| NR4A1    | 0.90853 | 0.26132 | 0.435 | 0.45 | 1 | HC_vs_MS.NoTrt_B |
| HIVEP2   | 0.90912 | 0.51805 | 0.396 | 0.43 | 1 | HC_vs_MS.NoTrt_B |
| IRAK2    | 0.90913 | 0.71498 | 0.288 | 0.3  | 1 | HC_vs_MS.NoTrt_B |
| GPR35    | 0.90917 | 0.6236  | 0.28  | 0.29 | 1 | HC_vs_MS.NoTrt_B |
| OTUD4    | 0.90931 | 0.48483 | 0.597 | 0.63 | 1 | HC_vs_MS.NoTrt_B |
| FARP2    | 0.90961 | -0.8412 | 0.381 | 0.39 | 1 | HC_vs_MS.NoTrt_B |
| KLHL23   | 0.90985 | 0.31463 | 0.157 | 0.16 | 1 | HC_vs_MS.NoTrt_B |
| UPB1     | 0.91017 | 0.2691  | 0.552 | 0.58 | 1 | HC_vs_MS.NoTrt_B |
| CD40     | 0.91026 | -0.2931 | 0.143 | 0.15 | 1 | HC_vs_MS.NoTrt_B |
| TTC39A   | 0.91103 | 0.37221 | 0.333 | 0.36 | 1 | HC_vs_MS.NoTrt_B |
| TCOF1    | 0.91144 | -0.3496 | 0.79  | 0.79 | 1 | HC_vs_MS.NoTrt_B |
| RAB26    | 0.9118  | -0.3272 | 0.132 | 0.13 | 1 | HC_vs_MS.NoTrt_B |
| ZMAT3    | 0.91182 | 0.7215  | 0.564 | 0.6  | 1 | HC_vs_MS.NoTrt_B |
| FAM110A  | 0.91243 | 0.38789 | 0.165 | 0.17 | 1 | HC_vs_MS.NoTrt_B |
| SLC6A16  | 0.91251 | 0.68249 | 0.243 | 0.24 | 1 | HC_vs_MS.NoTrt_B |
| MDN1     | 0.91274 | 0.59191 | 0.241 | 0.24 | 1 | HC_vs_MS.NoTrt_B |
| SLC43A3  | 0.91323 | -0.2606 | 0.423 | 0.4  | 1 | HC_vs_MS.NoTrt_B |
| PHACTR1  | 0.91329 | 0.62378 | 0.393 | 0.41 | 1 | HC_vs_MS.NoTrt_B |
| CKS1B    | 0.91335 | 0.25647 | 0.186 | 0.19 | 1 | HC_vs_MS.NoTrt_B |
| ZNF175   | 0.91342 | -1.3163 | 0.167 | 0.17 | 1 | HC_vs_MS.NoTrt_B |
| ADH4     | 0.9139  | 0.28521 | 0.328 | 0.35 | 1 | HC_vs_MS.NoTrt_B |
| WDR3     | 0.9141  | 0.39921 | 0.712 | 0.73 | 1 | HC_vs_MS.NoTrt_B |
| GULP1    | 0.91444 | 0.49306 | 0.42  | 0.47 | 1 | HC_vs_MS.NoTrt_B |

|          |         |         |       |      |   |                  |
|----------|---------|---------|-------|------|---|------------------|
| APOL4    | 0.91535 | 0.31776 | 0.43  | 0.46 | 1 | HC_vs_MS.NoTrt_B |
| SEMA4D   | 0.91553 | 0.3852  | 0.512 | 0.52 | 1 | HC_vs_MS.NoTrt_B |
| C21orf59 | 0.91617 | -0.3264 | 0.446 | 0.42 | 1 | HC_vs_MS.NoTrt_B |
| SCAMP1   | 0.9164  | 0.40741 | 0.442 | 0.44 | 1 | HC_vs_MS.NoTrt_B |
| FAM102B  | 0.9171  | 0.72145 | 0.171 | 0.17 | 1 | HC_vs_MS.NoTrt_B |
| CAAP1    | 0.91738 | 0.79263 | 0.109 | 0.11 | 1 | HC_vs_MS.NoTrt_B |
| SRL      | 0.91751 | 0.25601 | 0.346 | 0.37 | 1 | HC_vs_MS.NoTrt_B |
| KLRG1    | 0.91777 | 0.587   | 0.374 | 0.42 | 1 | HC_vs_MS.NoTrt_B |
| CLIP4    | 0.918   | 0.64603 | 0.125 | 0.13 | 1 | HC_vs_MS.NoTrt_B |
| C2orf42  | 0.91801 | 0.50374 | 0.1   | 0.1  | 1 | HC_vs_MS.NoTrt_B |
| FAM210B  | 0.91821 | 0.38728 | 0.31  | 0.31 | 1 | HC_vs_MS.NoTrt_B |
| GID4     | 0.91834 | 0.65834 | 0.675 | 0.71 | 1 | HC_vs_MS.NoTrt_B |
| SORL1    | 0.91888 | 0.31829 | 0.799 | 0.78 | 1 | HC_vs_MS.NoTrt_B |
| RABEPK   | 0.91952 | -0.3649 | 0.749 | 0.75 | 1 | HC_vs_MS.NoTrt_B |
| SLC1A2   | 0.91962 | 0.54492 | 0.329 | 0.36 | 1 | HC_vs_MS.NoTrt_B |
| LXN      | 0.91986 | 0.32634 | 0.168 | 0.17 | 1 | HC_vs_MS.NoTrt_B |
| C1orf52  | 0.92065 | 0.35622 | 0.283 | 0.29 | 1 | HC_vs_MS.NoTrt_B |
| PPP2CB   | 0.9208  | 0.52233 | 0.57  | 0.6  | 1 | HC_vs_MS.NoTrt_B |
| ZKSCAN8  | 0.92171 | 1.77357 | 0.281 | 0.29 | 1 | HC_vs_MS.NoTrt_B |
| FKBP11   | 0.92187 | -0.3053 | 0.684 | 0.7  | 1 | HC_vs_MS.NoTrt_B |
| FKTN     | 0.92191 | 1.04143 | 0.143 | 0.14 | 1 | HC_vs_MS.NoTrt_B |
| AKT1     | 0.92227 | -0.3267 | 0.203 | 0.2  | 1 | HC_vs_MS.NoTrt_B |
| CREBRF   | 0.92299 | 0.30579 | 0.768 | 0.81 | 1 | HC_vs_MS.NoTrt_B |
| RGS13    | 0.92305 | 0.367   | 0.338 | 0.37 | 1 | HC_vs_MS.NoTrt_B |
| IKZF2    | 0.92335 | 0.52845 | 0.357 | 0.39 | 1 | HC_vs_MS.NoTrt_B |
| RBL1     | 0.92428 | 0.62393 | 0.561 | 0.57 | 1 | HC_vs_MS.NoTrt_B |
| PIM1     | 0.92467 | 0.2863  | 0.384 | 0.41 | 1 | HC_vs_MS.NoTrt_B |
| PAK2     | 0.92483 | 0.31487 | 0.745 | 0.78 | 1 | HC_vs_MS.NoTrt_B |
| CARM1    | 0.92492 | -0.2541 | 0.132 | 0.14 | 1 | HC_vs_MS.NoTrt_B |
| METTL15  | 0.92531 | 0.63833 | 0.377 | 0.39 | 1 | HC_vs_MS.NoTrt_B |
| PPP1R15B | 0.92545 | -0.4205 | 0.281 | 0.28 | 1 | HC_vs_MS.NoTrt_B |
| C19orf54 | 0.92562 | 0.4258  | 0.43  | 0.46 | 1 | HC_vs_MS.NoTrt_B |
| KIAA1324 | 0.9261  | -0.3468 | 0.719 | 0.78 | 1 | HC_vs_MS.NoTrt_B |
| 2-Mar    | 0.92634 | -0.6628 | 0.516 | 0.54 | 1 | HC_vs_MS.NoTrt_B |
| DOPEY1   | 0.92682 | 1.60979 | 0.288 | 0.31 | 1 | HC_vs_MS.NoTrt_B |
| RNF138   | 0.92693 | 0.54843 | 0.145 | 0.15 | 1 | HC_vs_MS.NoTrt_B |
| CNIH4    | 0.92699 | 0.9373  | 0.559 | 0.62 | 1 | HC_vs_MS.NoTrt_B |
| SYT15    | 0.92701 | 0.26229 | 0.5   | 0.54 | 1 | HC_vs_MS.NoTrt_B |
| CDT1     | 0.92746 | 0.43802 | 0.416 | 0.42 | 1 | HC_vs_MS.NoTrt_B |
| ITM2A    | 0.92755 | 0.25331 | 0.219 | 0.22 | 1 | HC_vs_MS.NoTrt_B |

|            |         |         |       |      |   |                  |
|------------|---------|---------|-------|------|---|------------------|
| SLC4A5     | 0.9277  | 0.28437 | 0.7   | 0.77 | 1 | HC_vs_MS.NoTrt_B |
| CELF5      | 0.92777 | -0.3105 | 0.264 | 0.28 | 1 | HC_vs_MS.NoTrt_B |
| CARD6      | 0.92876 | -0.7033 | 0.503 | 0.55 | 1 | HC_vs_MS.NoTrt_B |
| AKAP8      | 0.92959 | -0.3306 | 0.37  | 0.37 | 1 | HC_vs_MS.NoTrt_B |
| PACS1      | 0.9298  | 0.29595 | 0.817 | 0.83 | 1 | HC_vs_MS.NoTrt_B |
| CNN3       | 0.93063 | 1.21231 | 0.165 | 0.17 | 1 | HC_vs_MS.NoTrt_B |
| MAF        | 0.93148 | 0.89823 | 0.27  | 0.29 | 1 | HC_vs_MS.NoTrt_B |
| PRKAR1A    | 0.93164 | 0.36056 | 0.254 | 0.26 | 1 | HC_vs_MS.NoTrt_B |
| NNT        | 0.93185 | -0.3054 | 0.638 | 0.63 | 1 | HC_vs_MS.NoTrt_B |
| MAD2L1BP   | 0.93207 | -0.5966 | 0.164 | 0.16 | 1 | HC_vs_MS.NoTrt_B |
| SMAD5      | 0.93286 | 0.81079 | 0.441 | 0.47 | 1 | HC_vs_MS.NoTrt_B |
| LRRC37A3   | 0.93306 | 0.52126 | 0.528 | 0.56 | 1 | HC_vs_MS.NoTrt_B |
| FAM19A2    | 0.93352 | 0.91051 | 0.217 | 0.22 | 1 | HC_vs_MS.NoTrt_B |
| TPRG1L     | 0.93419 | 0.9177  | 0.242 | 0.24 | 1 | HC_vs_MS.NoTrt_B |
| UBAP1      | 0.93439 | 0.27079 | 0.122 | 0.12 | 1 | HC_vs_MS.NoTrt_B |
| ELMSAN1    | 0.93499 | 0.31564 | 0.674 | 0.68 | 1 | HC_vs_MS.NoTrt_B |
| RBPMS      | 0.93546 | 0.27602 | 0.1   | 0.1  | 1 | HC_vs_MS.NoTrt_B |
| TAF11      | 0.93655 | 0.29571 | 0.483 | 0.51 | 1 | HC_vs_MS.NoTrt_B |
| FGD5       | 0.93685 | 0.51176 | 0.525 | 0.57 | 1 | HC_vs_MS.NoTrt_B |
| UBXN2B     | 0.93712 | 0.59894 | 0.343 | 0.36 | 1 | HC_vs_MS.NoTrt_B |
| AC016577.1 | 0.93713 | 0.27265 | 0.391 | 0.42 | 1 | HC_vs_MS.NoTrt_B |
| CXXC5      | 0.93744 | 0.86587 | 0.504 | 0.55 | 1 | HC_vs_MS.NoTrt_B |
| ZNF354A    | 0.93766 | 0.87152 | 0.18  | 0.19 | 1 | HC_vs_MS.NoTrt_B |
| KMT2C      | 0.93839 | 0.46141 | 0.422 | 0.44 | 1 | HC_vs_MS.NoTrt_B |
| IKBKB      | 0.93872 | 0.458   | 0.83  | 0.87 | 1 | HC_vs_MS.NoTrt_B |
| ZNF552     | 0.93931 | -0.3506 | 0.399 | 0.42 | 1 | HC_vs_MS.NoTrt_B |
| WNK1       | 0.93958 | 0.34308 | 0.526 | 0.57 | 1 | HC_vs_MS.NoTrt_B |
| TTC16      | 0.93967 | 0.33108 | 0.561 | 0.62 | 1 | HC_vs_MS.NoTrt_B |
| MVD        | 0.93988 | 0.29118 | 0.454 | 0.5  | 1 | HC_vs_MS.NoTrt_B |
| MKL1       | 0.93999 | 0.45858 | 0.387 | 0.4  | 1 | HC_vs_MS.NoTrt_B |
| MIGA2      | 0.94046 | -0.3334 | 0.399 | 0.38 | 1 | HC_vs_MS.NoTrt_B |
| TBCK       | 0.94058 | 0.47655 | 0.725 | 0.74 | 1 | HC_vs_MS.NoTrt_B |
| SWAP70     | 0.94139 | -0.4067 | 0.458 | 0.48 | 1 | HC_vs_MS.NoTrt_B |
| MBNL2      | 0.94159 | 0.26226 | 0.18  | 0.18 | 1 | HC_vs_MS.NoTrt_B |
| CCDC113    | 0.94205 | 0.31151 | 0.639 | 0.68 | 1 | HC_vs_MS.NoTrt_B |
| YEATS2     | 0.94218 | 0.5477  | 0.623 | 0.66 | 1 | HC_vs_MS.NoTrt_B |
| NEDD4L     | 0.94255 | -0.3198 | 0.42  | 0.43 | 1 | HC_vs_MS.NoTrt_B |
| NUP35      | 0.94264 | -0.484  | 0.462 | 0.5  | 1 | HC_vs_MS.NoTrt_B |
| ZNF23      | 0.94294 | 0.38663 | 0.326 | 0.35 | 1 | HC_vs_MS.NoTrt_B |
| SHF        | 0.94298 | 0.27822 | 0.336 | 0.35 | 1 | HC_vs_MS.NoTrt_B |

|           |         |         |       |      |   |                  |
|-----------|---------|---------|-------|------|---|------------------|
| XYLT2     | 0.94343 | 0.33762 | 0.586 | 0.62 | 1 | HC_vs_MS.NoTrt_B |
| RNF4      | 0.94344 | 0.2726  | 0.765 | 0.77 | 1 | HC_vs_MS.NoTrt_B |
| SZRD1     | 0.94347 | 0.40978 | 0.193 | 0.2  | 1 | HC_vs_MS.NoTrt_B |
| 9-Sep     | 0.94377 | 0.64781 | 0.587 | 0.67 | 1 | HC_vs_MS.NoTrt_B |
| TANC1     | 0.94388 | 0.65635 | 0.339 | 0.35 | 1 | HC_vs_MS.NoTrt_B |
| SLC25A37  | 0.94404 | 0.49144 | 0.649 | 0.68 | 1 | HC_vs_MS.NoTrt_B |
| RBFA      | 0.94468 | 0.91501 | 0.288 | 0.29 | 1 | HC_vs_MS.NoTrt_B |
| MSL3      | 0.94481 | 0.38102 | 0.184 | 0.2  | 1 | HC_vs_MS.NoTrt_B |
| DHRS11    | 0.94574 | -0.6868 | 0.283 | 0.29 | 1 | HC_vs_MS.NoTrt_B |
| MEMO1     | 0.94577 | 0.28308 | 0.301 | 0.3  | 1 | HC_vs_MS.NoTrt_B |
| PPP1R16A  | 0.94618 | 0.9898  | 0.436 | 0.45 | 1 | HC_vs_MS.NoTrt_B |
| ITPR1     | 0.94686 | 0.2734  | 0.154 | 0.15 | 1 | HC_vs_MS.NoTrt_B |
| ATPAF1    | 0.9472  | -0.5697 | 0.235 | 0.23 | 1 | HC_vs_MS.NoTrt_B |
| CENPM     | 0.94734 | -0.7481 | 0.3   | 0.29 | 1 | HC_vs_MS.NoTrt_B |
| RGPD8     | 0.9475  | 0.96503 | 0.188 | 0.2  | 1 | HC_vs_MS.NoTrt_B |
| RAI1      | 0.94761 | 0.69547 | 0.209 | 0.21 | 1 | HC_vs_MS.NoTrt_B |
| RXRA      | 0.94775 | 1.32092 | 0.138 | 0.14 | 1 | HC_vs_MS.NoTrt_B |
| UBP1      | 0.94819 | 0.71373 | 0.099 | 0.1  | 1 | HC_vs_MS.NoTrt_B |
| RC3H2     | 0.94823 | 0.43972 | 0.496 | 0.5  | 1 | HC_vs_MS.NoTrt_B |
| HEATR1    | 0.94842 | 0.41643 | 0.138 | 0.14 | 1 | HC_vs_MS.NoTrt_B |
| USP36     | 0.94874 | 0.52788 | 0.239 | 0.24 | 1 | HC_vs_MS.NoTrt_B |
| PTAFR     | 0.94878 | 0.39232 | 0.567 | 0.61 | 1 | HC_vs_MS.NoTrt_B |
| LINC00094 | 0.94951 | 0.68923 | 0.457 | 0.46 | 1 | HC_vs_MS.NoTrt_B |
| TMEM140   | 0.94969 | 0.4227  | 0.178 | 0.18 | 1 | HC_vs_MS.NoTrt_B |
| SERPINF1  | 0.95028 | 0.36437 | 0.752 | 0.84 | 1 | HC_vs_MS.NoTrt_B |
| PTPN18    | 0.95051 | 1.03071 | 0.37  | 0.4  | 1 | HC_vs_MS.NoTrt_B |
| TMEM221   | 0.95053 | 0.49408 | 0.17  | 0.17 | 1 | HC_vs_MS.NoTrt_B |
| DHX30     | 0.95074 | -0.3588 | 0.639 | 0.64 | 1 | HC_vs_MS.NoTrt_B |
| DCTN5     | 0.95114 | -0.3157 | 0.781 | 0.82 | 1 | HC_vs_MS.NoTrt_B |
| ZEB1      | 0.95123 | 0.90818 | 0.565 | 0.56 | 1 | HC_vs_MS.NoTrt_B |
| STK17A    | 0.9521  | 1.04039 | 0.274 | 0.29 | 1 | HC_vs_MS.NoTrt_B |
| NCBP1     | 0.95253 | 0.46896 | 0.649 | 0.71 | 1 | HC_vs_MS.NoTrt_B |
| TRIM46    | 0.95314 | -0.7854 | 0.417 | 0.44 | 1 | HC_vs_MS.NoTrt_B |
| ZNF397    | 0.95335 | -0.4223 | 0.946 | 0.96 | 1 | HC_vs_MS.NoTrt_B |
| ANK1      | 0.95337 | -1.2155 | 0.225 | 0.22 | 1 | HC_vs_MS.NoTrt_B |
| HMG20A    | 0.95337 | 0.7713  | 0.264 | 0.28 | 1 | HC_vs_MS.NoTrt_B |
| XYLT1     | 0.95339 | 0.31194 | 0.116 | 0.11 | 1 | HC_vs_MS.NoTrt_B |
| PGM3      | 0.95418 | 1.0872  | 0.245 | 0.25 | 1 | HC_vs_MS.NoTrt_B |
| P2RY10    | 0.95428 | 0.41014 | 0.309 | 0.3  | 1 | HC_vs_MS.NoTrt_B |
| KDM4C     | 0.95433 | 0.35212 | 0.291 | 0.3  | 1 | HC_vs_MS.NoTrt_B |

|          |         |         |       |      |   |                  |
|----------|---------|---------|-------|------|---|------------------|
| NIPAL2   | 0.95435 | -0.4003 | 0.281 | 0.28 | 1 | HC_vs_MS.NoTrt_B |
| PUS3     | 0.9545  | 0.30183 | 0.31  | 0.32 | 1 | HC_vs_MS.NoTrt_B |
| NDUFAF6  | 0.95457 | 0.33648 | 0.622 | 0.63 | 1 | HC_vs_MS.NoTrt_B |
| ZNF786   | 0.95502 | -0.3793 | 0.406 | 0.41 | 1 | HC_vs_MS.NoTrt_B |
| TBL3     | 0.95611 | 0.35919 | 0.268 | 0.27 | 1 | HC_vs_MS.NoTrt_B |
| PER1     | 0.95647 | 0.50674 | 0.332 | 0.34 | 1 | HC_vs_MS.NoTrt_B |
| TBC1D15  | 0.95649 | 0.50404 | 0.572 | 0.6  | 1 | HC_vs_MS.NoTrt_B |
| GUSB     | 0.95682 | -0.3899 | 0.681 | 0.72 | 1 | HC_vs_MS.NoTrt_B |
| ZNF740   | 0.95735 | 0.37201 | 0.142 | 0.14 | 1 | HC_vs_MS.NoTrt_B |
| SSPO     | 0.95815 | 0.91102 | 0.123 | 0.12 | 1 | HC_vs_MS.NoTrt_B |
| ALG14    | 0.95828 | -0.3641 | 0.899 | 0.93 | 1 | HC_vs_MS.NoTrt_B |
| AGO4     | 0.95953 | -1.1417 | 0.28  | 0.28 | 1 | HC_vs_MS.NoTrt_B |
| CC2D1B   | 0.95962 | 0.25195 | 0.59  | 0.6  | 1 | HC_vs_MS.NoTrt_B |
| JAK2     | 0.95972 | 0.34888 | 0.223 | 0.22 | 1 | HC_vs_MS.NoTrt_B |
| LIPT2    | 0.96021 | -0.4154 | 0.123 | 0.12 | 1 | HC_vs_MS.NoTrt_B |
| KATNAL2  | 0.96041 | 0.6897  | 0.31  | 0.32 | 1 | HC_vs_MS.NoTrt_B |
| DHDDS    | 0.96044 | 0.575   | 0.543 | 0.57 | 1 | HC_vs_MS.NoTrt_B |
| WDR44    | 0.96045 | 0.44103 | 0.1   | 0.1  | 1 | HC_vs_MS.NoTrt_B |
| GPC2     | 0.96093 | 0.57023 | 0.397 | 0.43 | 1 | HC_vs_MS.NoTrt_B |
| MTPAP    | 0.9615  | 0.69441 | 0.832 | 0.89 | 1 | HC_vs_MS.NoTrt_B |
| SPEF2    | 0.9621  | 0.43267 | 0.546 | 0.56 | 1 | HC_vs_MS.NoTrt_B |
| ZNF658   | 0.96228 | 0.46582 | 0.175 | 0.18 | 1 | HC_vs_MS.NoTrt_B |
| YY1      | 0.96288 | 0.66524 | 0.314 | 0.32 | 1 | HC_vs_MS.NoTrt_B |
| PRPF40B  | 0.96319 | 0.33848 | 0.204 | 0.21 | 1 | HC_vs_MS.NoTrt_B |
| EXOSC3   | 0.96327 | 0.33146 | 0.429 | 0.44 | 1 | HC_vs_MS.NoTrt_B |
| ZNF812P  | 0.96347 | 0.36805 | 0.109 | 0.11 | 1 | HC_vs_MS.NoTrt_B |
| PRRC2A   | 0.96409 | 0.46833 | 0.757 | 0.82 | 1 | HC_vs_MS.NoTrt_B |
| AMD1     | 0.9652  | -0.4456 | 0.713 | 0.74 | 1 | HC_vs_MS.NoTrt_B |
| RALGAPA2 | 0.96527 | 0.82817 | 0.149 | 0.15 | 1 | HC_vs_MS.NoTrt_B |
| ABCD3    | 0.96606 | 0.43388 | 0.125 | 0.12 | 1 | HC_vs_MS.NoTrt_B |
| SETD5    | 0.96608 | 0.77967 | 0.496 | 0.53 | 1 | HC_vs_MS.NoTrt_B |
| SYK      | 0.9663  | 0.28353 | 0.333 | 0.35 | 1 | HC_vs_MS.NoTrt_B |
| MAP4K5   | 0.96661 | 0.54615 | 0.494 | 0.53 | 1 | HC_vs_MS.NoTrt_B |
| CLMN     | 0.96725 | 0.29752 | 0.63  | 0.66 | 1 | HC_vs_MS.NoTrt_B |
| TAF1B    | 0.96806 | 0.32272 | 0.464 | 0.49 | 1 | HC_vs_MS.NoTrt_B |
| KCTD21   | 0.96814 | -1.0453 | 0.416 | 0.42 | 1 | HC_vs_MS.NoTrt_B |
| LCOR     | 0.96838 | 0.32914 | 0.367 | 0.37 | 1 | HC_vs_MS.NoTrt_B |
| 6-Mar    | 0.96839 | 0.33677 | 0.8   | 0.85 | 1 | HC_vs_MS.NoTrt_B |
| MAGEA10  | 0.96907 | 0.27874 | 0.543 | 0.56 | 1 | HC_vs_MS.NoTrt_B |
| COMMD2   | 0.96949 | 0.38757 | 0.329 | 0.33 | 1 | HC_vs_MS.NoTrt_B |



|             |         |         |       |      |   |                  |
|-------------|---------|---------|-------|------|---|------------------|
| PFKFB3      | 0.9702  | 0.78718 | 0.23  | 0.23 | 1 | HC_vs_MS.NoTrt_B |
| C1R         | 0.97106 | 0.65506 | 0.346 | 0.38 | 1 | HC_vs_MS.NoTrt_B |
| PPAT        | 0.97131 | 0.40008 | 0.271 | 0.28 | 1 | HC_vs_MS.NoTrt_B |
| DNAJB5      | 0.9715  | -1.38   | 0.146 | 0.15 | 1 | HC_vs_MS.NoTrt_B |
| COLGALT1    | 0.97382 | 0.29257 | 0.436 | 0.47 | 1 | HC_vs_MS.NoTrt_B |
| TNRC6A      | 0.97383 | 0.3434  | 0.764 | 0.81 | 1 | HC_vs_MS.NoTrt_B |
| NEPRO       | 0.97395 | 0.42993 | 0.194 | 0.2  | 1 | HC_vs_MS.NoTrt_B |
| C21orf2     | 0.97439 | 0.33997 | 0.123 | 0.12 | 1 | HC_vs_MS.NoTrt_B |
| CNOT1       | 0.97532 | 0.34149 | 0.806 | 0.84 | 1 | HC_vs_MS.NoTrt_B |
| RCAN1       | 0.976   | 0.37401 | 0.303 | 0.32 | 1 | HC_vs_MS.NoTrt_B |
| C2CD5       | 0.97619 | 0.62717 | 0.165 | 0.17 | 1 | HC_vs_MS.NoTrt_B |
| HSPH1       | 0.97659 | 0.70527 | 0.165 | 0.17 | 1 | HC_vs_MS.NoTrt_B |
| ZCCHC17     | 0.97665 | 0.36023 | 0.117 | 0.12 | 1 | HC_vs_MS.NoTrt_B |
| VPS4B       | 0.97667 | -0.2508 | 0.742 | 0.78 | 1 | HC_vs_MS.NoTrt_B |
| BCR         | 0.977   | -0.2746 | 0.261 | 0.27 | 1 | HC_vs_MS.NoTrt_B |
| KPTN        | 0.97825 | 0.41266 | 0.212 | 0.22 | 1 | HC_vs_MS.NoTrt_B |
| MYSM1       | 0.9784  | 0.82348 | 0.206 | 0.21 | 1 | HC_vs_MS.NoTrt_B |
| ACTG2       | 0.97854 | 0.56918 | 0.241 | 0.24 | 1 | HC_vs_MS.NoTrt_B |
| HHLA1       | 0.97869 | 0.34889 | 0.381 | 0.41 | 1 | HC_vs_MS.NoTrt_B |
| NPIP11      | 0.97915 | 0.6605  | 0.446 | 0.49 | 1 | HC_vs_MS.NoTrt_B |
| ZNF561      | 0.97944 | -0.4657 | 0.532 | 0.55 | 1 | HC_vs_MS.NoTrt_B |
| STAT2       | 0.98011 | 0.62061 | 0.883 | 0.92 | 1 | HC_vs_MS.NoTrt_B |
| NKIRAS2     | 0.98056 | -0.2904 | 0.806 | 0.85 | 1 | HC_vs_MS.NoTrt_B |
| ABCB6       | 0.9817  | 0.30791 | 0.113 | 0.11 | 1 | HC_vs_MS.NoTrt_B |
| CTD-2192J10 | 0.98217 | 0.56049 | 0.454 | 0.48 | 1 | HC_vs_MS.NoTrt_B |
| HAUS1       | 0.98241 | -0.359  | 0.635 | 0.62 | 1 | HC_vs_MS.NoTrt_B |
| ZNF664      | 0.98257 | 0.36638 | 0.233 | 0.24 | 1 | HC_vs_MS.NoTrt_B |
| RNF19A      | 0.98261 | 0.36603 | 0.412 | 0.43 | 1 | HC_vs_MS.NoTrt_B |
| MYO6        | 0.98283 | 0.41294 | 0.419 | 0.45 | 1 | HC_vs_MS.NoTrt_B |
| AC004381.6  | 0.98285 | 0.57317 | 0.196 | 0.2  | 1 | HC_vs_MS.NoTrt_B |
| PCBP1       | 0.98322 | 0.37019 | 0.514 | 0.53 | 1 | HC_vs_MS.NoTrt_B |
| ANKRD22     | 0.98337 | 0.27063 | 0.125 | 0.12 | 1 | HC_vs_MS.NoTrt_B |
| CEP135      | 0.9834  | 0.44364 | 0.757 | 0.8  | 1 | HC_vs_MS.NoTrt_B |
| DCAF7       | 0.98394 | -0.2818 | 0.348 | 0.32 | 1 | HC_vs_MS.NoTrt_B |
| MORN4       | 0.98403 | 0.41882 | 0.532 | 0.58 | 1 | HC_vs_MS.NoTrt_B |
| ZNF33A      | 0.98422 | 0.2608  | 0.574 | 0.58 | 1 | HC_vs_MS.NoTrt_B |
| CNPY4       | 0.98436 | 0.47607 | 0.69  | 0.75 | 1 | HC_vs_MS.NoTrt_B |
| LDHAL6A     | 0.98439 | 0.50884 | 0.349 | 0.37 | 1 | HC_vs_MS.NoTrt_B |
| ERMN        | 0.98452 | 0.26158 | 0.172 | 0.17 | 1 | HC_vs_MS.NoTrt_B |
| ATP13A4     | 0.98509 | 0.70079 | 0.397 | 0.42 | 1 | HC_vs_MS.NoTrt_B |

|           |          |         |       |      |          |                      |
|-----------|----------|---------|-------|------|----------|----------------------|
| GPR174    | 0.98524  | 0.31224 | 0.154 | 0.16 | 1        | HC_vs_MS.NoTrt_B     |
| PDE4D     | 0.98577  | 0.35438 | 0.304 | 0.32 | 1        | HC_vs_MS.NoTrt_B     |
| SIRT2     | 0.98613  | -0.4039 | 0.897 | 0.91 | 1        | HC_vs_MS.NoTrt_B     |
| ETFB      | 0.98639  | -0.2832 | 0.868 | 0.9  | 1        | HC_vs_MS.NoTrt_B     |
| METTLL12  | 0.98695  | 0.5879  | 0.613 | 0.67 | 1        | HC_vs_MS.NoTrt_B     |
| SIRT1     | 0.98761  | 0.44903 | 0.103 | 0.1  | 1        | HC_vs_MS.NoTrt_B     |
| CHD2      | 0.98811  | 0.30586 | 0.987 | 0.99 | 1        | HC_vs_MS.NoTrt_B     |
| SSFA2     | 0.98837  | 0.49553 | 0.119 | 0.12 | 1        | HC_vs_MS.NoTrt_B     |
| INPP5E    | 0.98928  | 0.36167 | 0.27  | 0.27 | 1        | HC_vs_MS.NoTrt_B     |
| HAUS8     | 0.98955  | -0.3307 | 0.726 | 0.75 | 1        | HC_vs_MS.NoTrt_B     |
| CNIH3     | 0.99124  | -0.5556 | 0.171 | 0.17 | 1        | HC_vs_MS.NoTrt_B     |
| FAM60A    | 0.99142  | 0.53348 | 0.522 | 0.55 | 1        | HC_vs_MS.NoTrt_B     |
| TLL2      | 0.99162  | 0.32112 | 0.316 | 0.33 | 1        | HC_vs_MS.NoTrt_B     |
| XYLB      | 0.99163  | 0.27943 | 0.433 | 0.45 | 1        | HC_vs_MS.NoTrt_B     |
| ZNF287    | 0.99166  | -0.4026 | 0.365 | 0.37 | 1        | HC_vs_MS.NoTrt_B     |
| MTBP      | 0.99189  | 0.40515 | 0.597 | 0.62 | 1        | HC_vs_MS.NoTrt_B     |
| MLANA     | 0.99204  | 0.3098  | 0.394 | 0.44 | 1        | HC_vs_MS.NoTrt_B     |
| PATJ      | 0.99213  | 0.33512 | 0.662 | 0.68 | 1        | HC_vs_MS.NoTrt_B     |
| USO1      | 0.99227  | 1.07089 | 0.133 | 0.14 | 1        | HC_vs_MS.NoTrt_B     |
| NDST4     | 0.9925   | 0.35532 | 0.109 | 0.11 | 1        | HC_vs_MS.NoTrt_B     |
| APBA2     | 0.99308  | 0.56246 | 0.522 | 0.54 | 1        | HC_vs_MS.NoTrt_B     |
| USP3      | 0.99367  | 0.4486  | 0.743 | 0.74 | 1        | HC_vs_MS.NoTrt_B     |
| CHAMP1    | 0.99376  | 0.35159 | 0.581 | 0.62 | 1        | HC_vs_MS.NoTrt_B     |
| MED22     | 0.9943   | 0.60565 | 0.506 | 0.55 | 1        | HC_vs_MS.NoTrt_B     |
| CCDC120   | 0.99433  | 0.43668 | 0.464 | 0.5  | 1        | HC_vs_MS.NoTrt_B     |
| AURKA     | 0.99445  | 0.53858 | 0.286 | 0.3  | 1        | HC_vs_MS.NoTrt_B     |
| KNSTRN    | 0.99562  | 0.46094 | 0.475 | 0.49 | 1        | HC_vs_MS.NoTrt_B     |
| SLC7A6    | 0.99582  | 0.29393 | 0.51  | 0.5  | 1        | HC_vs_MS.NoTrt_B     |
| KCNMB3    | 0.99622  | 0.48283 | 0.367 | 0.38 | 1        | HC_vs_MS.NoTrt_B     |
| GARNL3    | 0.9969   | 1.36895 | 0.155 | 0.16 | 1        | HC_vs_MS.NoTrt_B     |
| ANKRD7    | 0.99702  | 0.53258 | 0.171 | 0.18 | 1        | HC_vs_MS.NoTrt_B     |
| EXD2      | 0.99747  | 1.04718 | 0.181 | 0.18 | 1        | HC_vs_MS.NoTrt_B     |
| ATP10A    | 0.99751  | 0.33151 | 0.101 | 0.1  | 1        | HC_vs_MS.NoTrt_B     |
| CLMP      | 0.99775  | 0.50767 | 0.378 | 0.4  | 1        | HC_vs_MS.NoTrt_B     |
| KDM5D     | 0.99921  | -0.9367 | 0.316 | 0.31 | 1        | HC_vs_MS.NoTrt_B     |
| MMP24-AS1 | 0.99947  | 0.59597 | 0.725 | 0.76 | 1        | HC_vs_MS.NoTrt_B     |
| CHD3      | 0.9997   | 0.37066 | 0.365 | 0.38 | 1        | HC_vs_MS.NoTrt_B     |
| FBXO40    | 1        | 1.06782 | 0.328 | 0.34 | 1        | HC_vs_MS.NoTrt_B     |
| FBXL22    | 1        | 0.86429 | 0.103 | 0.1  | 1        | HC_vs_MS.NoTrt_B     |
| MT-ND4L   | 2.06E-22 | 1.36987 | 0.989 | 1    | 3.29E-18 | MS.Trt_vs_MS.NoTrt_F |

|          |          |         |       |      |          |                      |
|----------|----------|---------|-------|------|----------|----------------------|
| MT-CO2   | 1.18E-18 | 1.11448 | 0.996 | 1    | 1.89E-14 | MS.Trt_vs_MS.NoTrt_F |
| RBPJ     | 1.41E-18 | -0.3463 | 0.36  | 0.79 | 2.25E-14 | MS.Trt_vs_MS.NoTrt_F |
| HLA-B    | 1.32E-17 | -0.6715 | 0.881 | 0.99 | 2.10E-13 | MS.Trt_vs_MS.NoTrt_F |
| TAC4     | 3.62E-14 | -0.9884 | 0.561 | 0.8  | 5.78E-10 | MS.Trt_vs_MS.NoTrt_F |
| CD69     | 4.93E-14 | -0.9566 | 0.277 | 0.66 | 7.88E-10 | MS.Trt_vs_MS.NoTrt_F |
| RGS1     | 8.40E-14 | -1.0624 | 0.356 | 0.7  | 1.34E-09 | MS.Trt_vs_MS.NoTrt_F |
| PCSK5    | 9.46E-14 | 1.55027 | 0.928 | 0.93 | 1.51E-09 | MS.Trt_vs_MS.NoTrt_F |
| ARHGAP9  | 1.08E-13 | -0.6735 | 0.46  | 0.77 | 1.73E-09 | MS.Trt_vs_MS.NoTrt_F |
| EEF1A1   | 2.56E-13 | -0.4483 | 0.964 | 1    | 4.09E-09 | MS.Trt_vs_MS.NoTrt_F |
| RPS4Y1   | 2.75E-13 | -3.8498 | 0.079 | 0.33 | 4.39E-09 | MS.Trt_vs_MS.NoTrt_F |
| RPS3     | 3.19E-13 | -0.4772 | 0.853 | 0.99 | 5.09E-09 | MS.Trt_vs_MS.NoTrt_F |
| HOXB2    | 2.36E-12 | -0.6688 | 0.112 | 0.39 | 3.77E-08 | MS.Trt_vs_MS.NoTrt_F |
| HSPA1A   | 3.95E-12 | -0.9118 | 0.169 | 0.47 | 6.31E-08 | MS.Trt_vs_MS.NoTrt_F |
| EIF4A2   | 4.27E-12 | -0.611  | 0.46  | 0.83 | 6.83E-08 | MS.Trt_vs_MS.NoTrt_F |
| AQP3     | 4.29E-12 | -0.8966 | 0.27  | 0.6  | 6.85E-08 | MS.Trt_vs_MS.NoTrt_F |
| SNRNP70  | 4.34E-12 | -1.0312 | 0.183 | 0.48 | 6.92E-08 | MS.Trt_vs_MS.NoTrt_F |
| SRSF7    | 5.15E-12 | -0.4925 | 0.396 | 0.76 | 8.23E-08 | MS.Trt_vs_MS.NoTrt_F |
| ECSIT    | 5.90E-12 | -0.8493 | 0.227 | 0.54 | 9.42E-08 | MS.Trt_vs_MS.NoTrt_F |
| RPL9     | 9.16E-12 | -0.6516 | 0.809 | 0.95 | 1.46E-07 | MS.Trt_vs_MS.NoTrt_F |
| HNRNPH1  | 9.83E-12 | 0.98686 | 0.993 | 1    | 1.57E-07 | MS.Trt_vs_MS.NoTrt_F |
| DNAJB1   | 2.04E-11 | -0.8421 | 0.683 | 0.92 | 3.26E-07 | MS.Trt_vs_MS.NoTrt_F |
| GBP5     | 3.13E-11 | -0.5737 | 0.54  | 0.81 | 4.99E-07 | MS.Trt_vs_MS.NoTrt_F |
| LSM6     | 4.34E-11 | -0.6833 | 0.115 | 0.38 | 6.93E-07 | MS.Trt_vs_MS.NoTrt_F |
| PBX1     | 6.33E-11 | -0.5771 | 0.878 | 0.95 | 1.01E-06 | MS.Trt_vs_MS.NoTrt_F |
| HSPA1B   | 7.57E-11 | -1.2509 | 0.212 | 0.49 | 1.21E-06 | MS.Trt_vs_MS.NoTrt_F |
| METTL21A | 1.09E-10 | 0.91762 | 0.953 | 0.95 | 1.74E-06 | MS.Trt_vs_MS.NoTrt_F |
| MTRNR2L4 | 1.88E-10 | -0.4194 | 0.924 | 0.99 | 3.01E-06 | MS.Trt_vs_MS.NoTrt_F |
| TYR      | 2.58E-10 | -0.6029 | 0.194 | 0.46 | 4.12E-06 | MS.Trt_vs_MS.NoTrt_F |
| JUN      | 2.59E-10 | -0.4896 | 0.327 | 0.64 | 4.13E-06 | MS.Trt_vs_MS.NoTrt_F |
| PHF1     | 2.93E-10 | -1.4454 | 0.129 | 0.38 | 4.68E-06 | MS.Trt_vs_MS.NoTrt_F |
| GPSM3    | 5.21E-10 | -0.7046 | 0.374 | 0.67 | 8.31E-06 | MS.Trt_vs_MS.NoTrt_F |
| ELF1     | 5.25E-10 | -0.6808 | 0.295 | 0.59 | 8.38E-06 | MS.Trt_vs_MS.NoTrt_F |
| RPL26    | 5.79E-10 | -0.4218 | 0.835 | 0.97 | 9.25E-06 | MS.Trt_vs_MS.NoTrt_F |
| ALKBH5   | 6.86E-10 | -0.8505 | 0.144 | 0.4  | 1.10E-05 | MS.Trt_vs_MS.NoTrt_F |
| MAML2    | 7.19E-10 | -1.3733 | 0.14  | 0.39 | 1.15E-05 | MS.Trt_vs_MS.NoTrt_F |
| SYNPO    | 7.97E-10 | -0.639  | 0.18  | 0.44 | 1.27E-05 | MS.Trt_vs_MS.NoTrt_F |
| ATP2B1   | 9.19E-10 | -0.2781 | 0.378 | 0.71 | 1.47E-05 | MS.Trt_vs_MS.NoTrt_F |
| LYPLA2   | 9.68E-10 | -0.9463 | 0.119 | 0.36 | 1.55E-05 | MS.Trt_vs_MS.NoTrt_F |
| LRRC8C   | 1.02E-09 | -0.8285 | 0.277 | 0.54 | 1.63E-05 | MS.Trt_vs_MS.NoTrt_F |
| JUNB     | 1.10E-09 | -0.5103 | 0.565 | 0.85 | 1.76E-05 | MS.Trt_vs_MS.NoTrt_F |

|            |          |         |       |      |          |                      |
|------------|----------|---------|-------|------|----------|----------------------|
| ANXA2      | 1.18E-09 | -0.502  | 0.637 | 0.86 | 1.89E-05 | MS.Trt_vs_MS.NoTrt_F |
| S100A4     | 1.23E-09 | -0.3053 | 0.55  | 0.9  | 1.97E-05 | MS.Trt_vs_MS.NoTrt_F |
| FAM160B1   | 1.33E-09 | -1.4204 | 0.147 | 0.4  | 2.12E-05 | MS.Trt_vs_MS.NoTrt_F |
| C1orf56    | 1.45E-09 | 0.93396 | 0.842 | 0.8  | 2.31E-05 | MS.Trt_vs_MS.NoTrt_F |
| POLR2G     | 1.57E-09 | -0.755  | 0.137 | 0.39 | 2.51E-05 | MS.Trt_vs_MS.NoTrt_F |
| TNIK       | 1.62E-09 | -0.4818 | 0.306 | 0.61 | 2.59E-05 | MS.Trt_vs_MS.NoTrt_F |
| CCDC14     | 1.66E-09 | -1.1961 | 0.187 | 0.45 | 2.65E-05 | MS.Trt_vs_MS.NoTrt_F |
| ANP32B     | 2.21E-09 | -0.405  | 0.237 | 0.51 | 3.52E-05 | MS.Trt_vs_MS.NoTrt_F |
| VPS13C     | 2.40E-09 | -0.6122 | 0.716 | 0.91 | 3.83E-05 | MS.Trt_vs_MS.NoTrt_F |
| TCEA1      | 2.50E-09 | -0.3421 | 0.252 | 0.54 | 4.00E-05 | MS.Trt_vs_MS.NoTrt_F |
| KIAA1551   | 2.65E-09 | -0.5045 | 0.403 | 0.71 | 4.23E-05 | MS.Trt_vs_MS.NoTrt_F |
| RUNDC3B    | 2.74E-09 | -0.7282 | 0.212 | 0.44 | 4.38E-05 | MS.Trt_vs_MS.NoTrt_F |
| SLC9A9     | 3.07E-09 | -1.2621 | 0.108 | 0.34 | 4.90E-05 | MS.Trt_vs_MS.NoTrt_F |
| VPS36      | 3.11E-09 | -0.8189 | 0.219 | 0.48 | 4.96E-05 | MS.Trt_vs_MS.NoTrt_F |
| SAYSD1     | 3.36E-09 | -0.2725 | 0.137 | 0.38 | 5.36E-05 | MS.Trt_vs_MS.NoTrt_F |
| PKM        | 3.63E-09 | -0.4899 | 0.478 | 0.79 | 5.80E-05 | MS.Trt_vs_MS.NoTrt_F |
| SF1        | 3.76E-09 | -0.4497 | 0.424 | 0.72 | 6.01E-05 | MS.Trt_vs_MS.NoTrt_F |
| CDKN1B     | 4.04E-09 | -0.7236 | 0.266 | 0.55 | 6.46E-05 | MS.Trt_vs_MS.NoTrt_F |
| TAGAP      | 4.06E-09 | -0.8216 | 0.245 | 0.52 | 6.48E-05 | MS.Trt_vs_MS.NoTrt_F |
| SMCHD1     | 5.31E-09 | -0.5247 | 0.608 | 0.85 | 8.48E-05 | MS.Trt_vs_MS.NoTrt_F |
| TAGLN2     | 5.36E-09 | -0.3632 | 0.471 | 0.82 | 8.56E-05 | MS.Trt_vs_MS.NoTrt_F |
| RASA2      | 5.54E-09 | -0.4398 | 0.327 | 0.61 | 8.84E-05 | MS.Trt_vs_MS.NoTrt_F |
| SMC3       | 6.35E-09 | -0.4404 | 0.205 | 0.47 | 1.01E-04 | MS.Trt_vs_MS.NoTrt_F |
| FLNA       | 6.51E-09 | -0.423  | 0.511 | 0.8  | 1.04E-04 | MS.Trt_vs_MS.NoTrt_F |
| ARL5B      | 6.96E-09 | -0.7725 | 0.112 | 0.33 | 1.11E-04 | MS.Trt_vs_MS.NoTrt_F |
| GBP2       | 7.31E-09 | -0.597  | 0.356 | 0.64 | 1.17E-04 | MS.Trt_vs_MS.NoTrt_F |
| TXNIP      | 7.35E-09 | -0.4972 | 0.504 | 0.8  | 1.17E-04 | MS.Trt_vs_MS.NoTrt_F |
| ELF4       | 7.71E-09 | -1.083  | 0.094 | 0.3  | 1.23E-04 | MS.Trt_vs_MS.NoTrt_F |
| STXBP2     | 8.89E-09 | -1.1342 | 0.216 | 0.46 | 1.42E-04 | MS.Trt_vs_MS.NoTrt_F |
| RP11-343C2 | 9.30E-09 | -1.0282 | 0.115 | 0.34 | 1.49E-04 | MS.Trt_vs_MS.NoTrt_F |
| PRKCQ      | 9.38E-09 | -0.5091 | 0.259 | 0.54 | 1.50E-04 | MS.Trt_vs_MS.NoTrt_F |
| ABCC1      | 9.61E-09 | -0.4485 | 0.32  | 0.6  | 1.53E-04 | MS.Trt_vs_MS.NoTrt_F |
| ORC6       | 1.06E-08 | 1.01191 | 0.964 | 0.97 | 1.69E-04 | MS.Trt_vs_MS.NoTrt_F |
| EFNA5      | 1.14E-08 | -0.325  | 0.32  | 0.57 | 1.82E-04 | MS.Trt_vs_MS.NoTrt_F |
| CEACAM1    | 1.22E-08 | -0.5398 | 0.917 | 0.75 | 1.94E-04 | MS.Trt_vs_MS.NoTrt_F |
| MAP1LC3B   | 1.22E-08 | -0.325  | 0.313 | 0.59 | 1.94E-04 | MS.Trt_vs_MS.NoTrt_F |
| SNU13      | 1.33E-08 | -0.7558 | 0.216 | 0.48 | 2.12E-04 | MS.Trt_vs_MS.NoTrt_F |
| CD28       | 1.37E-08 | -0.2834 | 0.547 | 0.77 | 2.19E-04 | MS.Trt_vs_MS.NoTrt_F |
| 9-Sep      | 1.62E-08 | -0.3375 | 0.453 | 0.71 | 2.58E-04 | MS.Trt_vs_MS.NoTrt_F |
| C10orf11   | 1.66E-08 | -0.3516 | 0.968 | 0.98 | 2.66E-04 | MS.Trt_vs_MS.NoTrt_F |

|           |          |         |       |      |          |                      |
|-----------|----------|---------|-------|------|----------|----------------------|
| DUSP10    | 1.72E-08 | -0.3949 | 0.223 | 0.49 | 2.74E-04 | MS.Trt_vs_MS.NoTrt_F |
| SDF2      | 1.72E-08 | -0.5896 | 0.183 | 0.44 | 2.74E-04 | MS.Trt_vs_MS.NoTrt_F |
| ARHGEF18  | 1.73E-08 | -0.4355 | 0.277 | 0.55 | 2.76E-04 | MS.Trt_vs_MS.NoTrt_F |
| CEP164    | 1.75E-08 | -0.6134 | 0.147 | 0.38 | 2.80E-04 | MS.Trt_vs_MS.NoTrt_F |
| CCDC167   | 1.80E-08 | -0.2586 | 0.122 | 0.34 | 2.88E-04 | MS.Trt_vs_MS.NoTrt_F |
| GTF3C5    | 1.99E-08 | -0.7869 | 0.273 | 0.52 | 3.17E-04 | MS.Trt_vs_MS.NoTrt_F |
| EPB41     | 2.00E-08 | -0.291  | 0.309 | 0.62 | 3.19E-04 | MS.Trt_vs_MS.NoTrt_F |
| MED15     | 2.32E-08 | -0.465  | 0.55  | 0.76 | 3.71E-04 | MS.Trt_vs_MS.NoTrt_F |
| CACYBP    | 2.33E-08 | -0.4309 | 0.201 | 0.46 | 3.72E-04 | MS.Trt_vs_MS.NoTrt_F |
| GAPDH     | 2.53E-08 | -0.3973 | 0.705 | 0.93 | 4.04E-04 | MS.Trt_vs_MS.NoTrt_F |
| HNRNPA2B1 | 2.62E-08 | -0.3396 | 0.612 | 0.9  | 4.19E-04 | MS.Trt_vs_MS.NoTrt_F |
| HNRNPA0   | 2.73E-08 | -0.5673 | 0.309 | 0.59 | 4.35E-04 | MS.Trt_vs_MS.NoTrt_F |
| JMJD1C    | 2.73E-08 | -0.6993 | 0.23  | 0.5  | 4.36E-04 | MS.Trt_vs_MS.NoTrt_F |
| IL6R      | 3.19E-08 | -0.5899 | 0.576 | 0.79 | 5.09E-04 | MS.Trt_vs_MS.NoTrt_F |
| ACTR1B    | 3.62E-08 | -0.6398 | 0.133 | 0.36 | 5.79E-04 | MS.Trt_vs_MS.NoTrt_F |
| MDN1      | 3.89E-08 | -0.6499 | 0.147 | 0.37 | 6.21E-04 | MS.Trt_vs_MS.NoTrt_F |
| KDM4C     | 4.84E-08 | -0.6033 | 0.216 | 0.46 | 7.73E-04 | MS.Trt_vs_MS.NoTrt_F |
| DLGAP4    | 5.21E-08 | -1.0069 | 0.14  | 0.36 | 8.33E-04 | MS.Trt_vs_MS.NoTrt_F |
| ARHGDI    | 5.25E-08 | -0.9319 | 0.342 | 0.58 | 8.38E-04 | MS.Trt_vs_MS.NoTrt_F |
| PIGF      | 5.51E-08 | -0.6959 | 0.083 | 0.27 | 8.80E-04 | MS.Trt_vs_MS.NoTrt_F |
| CDC25B    | 5.55E-08 | -0.5379 | 0.291 | 0.55 | 8.86E-04 | MS.Trt_vs_MS.NoTrt_F |
| KIAA2026  | 5.77E-08 | -0.6218 | 0.165 | 0.39 | 9.22E-04 | MS.Trt_vs_MS.NoTrt_F |
| AMMECR1L  | 6.79E-08 | -0.4761 | 0.191 | 0.44 | 0.001084 | MS.Trt_vs_MS.NoTrt_F |
| PRDX1     | 7.06E-08 | -0.4345 | 0.5   | 0.75 | 0.001127 | MS.Trt_vs_MS.NoTrt_F |
| NCKAP1L   | 7.14E-08 | -0.7131 | 0.701 | 0.86 | 0.00114  | MS.Trt_vs_MS.NoTrt_F |
| BAZ1B     | 7.17E-08 | -0.8542 | 0.144 | 0.37 | 0.001145 | MS.Trt_vs_MS.NoTrt_F |
| USMG5     | 7.43E-08 | 0.41199 | 0.18  | 0.43 | 0.001186 | MS.Trt_vs_MS.NoTrt_F |
| TCEAL8    | 7.48E-08 | -0.4896 | 0.094 | 0.29 | 0.001195 | MS.Trt_vs_MS.NoTrt_F |
| LIG1      | 7.48E-08 | -1.2339 | 0.119 | 0.33 | 0.001196 | MS.Trt_vs_MS.NoTrt_F |
| NARS      | 7.76E-08 | -0.7966 | 0.137 | 0.35 | 0.00124  | MS.Trt_vs_MS.NoTrt_F |
| COMMD1    | 8.26E-08 | 0.42387 | 0.493 | 0.82 | 0.00132  | MS.Trt_vs_MS.NoTrt_F |
| NDUFB8    | 8.74E-08 | -0.251  | 0.309 | 0.6  | 0.001396 | MS.Trt_vs_MS.NoTrt_F |
| C11orf98  | 9.03E-08 | -0.8473 | 0.122 | 0.33 | 0.001442 | MS.Trt_vs_MS.NoTrt_F |
| FAM118A   | 9.06E-08 | -0.9157 | 0.522 | 0.71 | 0.001446 | MS.Trt_vs_MS.NoTrt_F |
| LMF2      | 9.68E-08 | -0.3183 | 0.219 | 0.47 | 0.001546 | MS.Trt_vs_MS.NoTrt_F |
| IL2RA     | 9.88E-08 | -0.4478 | 0.288 | 0.54 | 0.001578 | MS.Trt_vs_MS.NoTrt_F |
| PDLIM2    | 1.02E-07 | -0.6394 | 0.629 | 0.85 | 0.001634 | MS.Trt_vs_MS.NoTrt_F |
| LDHB      | 1.02E-07 | -0.4051 | 0.579 | 0.85 | 0.001637 | MS.Trt_vs_MS.NoTrt_F |
| WWOX      | 1.03E-07 | -0.3895 | 0.194 | 0.43 | 0.001653 | MS.Trt_vs_MS.NoTrt_F |
| SYNE2     | 1.05E-07 | -0.4536 | 0.942 | 0.98 | 0.001681 | MS.Trt_vs_MS.NoTrt_F |

|           |          |         |       |      |          |                      |
|-----------|----------|---------|-------|------|----------|----------------------|
| SERBP1    | 1.09E-07 | -0.461  | 0.507 | 0.74 | 0.001743 | MS.Trt_vs_MS.NoTrt_F |
| ZNF142    | 1.10E-07 | -1.4273 | 0.083 | 0.27 | 0.001763 | MS.Trt_vs_MS.NoTrt_F |
| FAM46C    | 1.11E-07 | -0.5427 | 0.309 | 0.57 | 0.00178  | MS.Trt_vs_MS.NoTrt_F |
| NCK2      | 1.15E-07 | -0.7539 | 0.198 | 0.43 | 0.001834 | MS.Trt_vs_MS.NoTrt_F |
| COL8A1    | 1.23E-07 | 0.51738 | 0.957 | 0.81 | 0.00196  | MS.Trt_vs_MS.NoTrt_F |
| JAKMIP1   | 1.25E-07 | -0.276  | 0.205 | 0.45 | 0.001998 | MS.Trt_vs_MS.NoTrt_F |
| ATF2      | 1.30E-07 | -1.0264 | 0.176 | 0.41 | 0.002073 | MS.Trt_vs_MS.NoTrt_F |
| CD3E      | 1.37E-07 | -0.6649 | 0.626 | 0.85 | 0.002187 | MS.Trt_vs_MS.NoTrt_F |
| GABARAPL1 | 1.40E-07 | -1.0894 | 0.129 | 0.33 | 0.00223  | MS.Trt_vs_MS.NoTrt_F |
| CDC14A    | 1.40E-07 | -0.4047 | 0.183 | 0.42 | 0.002231 | MS.Trt_vs_MS.NoTrt_F |
| CASP8     | 1.46E-07 | -0.7687 | 0.91  | 0.97 | 0.002335 | MS.Trt_vs_MS.NoTrt_F |
| SUPT5H    | 1.53E-07 | -1.2279 | 0.36  | 0.59 | 0.002449 | MS.Trt_vs_MS.NoTrt_F |
| BTN3A2    | 1.56E-07 | -0.2569 | 0.701 | 0.85 | 0.002492 | MS.Trt_vs_MS.NoTrt_F |
| CNN2      | 1.59E-07 | -0.4948 | 0.964 | 0.98 | 0.002545 | MS.Trt_vs_MS.NoTrt_F |
| RFTN1     | 1.60E-07 | -0.3442 | 0.299 | 0.55 | 0.00256  | MS.Trt_vs_MS.NoTrt_F |
| ANTXR2    | 1.63E-07 | -0.3866 | 0.644 | 0.83 | 0.002606 | MS.Trt_vs_MS.NoTrt_F |
| TRERF1    | 1.63E-07 | -0.5838 | 0.112 | 0.32 | 0.002612 | MS.Trt_vs_MS.NoTrt_F |
| FAN1      | 1.71E-07 | 0.51251 | 0.209 | 0.44 | 0.002731 | MS.Trt_vs_MS.NoTrt_F |
| LGALS3    | 1.84E-07 | -0.4614 | 0.579 | 0.77 | 0.002937 | MS.Trt_vs_MS.NoTrt_F |
| DYNLL1    | 1.92E-07 | -0.3501 | 0.335 | 0.58 | 0.003068 | MS.Trt_vs_MS.NoTrt_F |
| MTMR6     | 2.06E-07 | -1.3148 | 0.104 | 0.29 | 0.003294 | MS.Trt_vs_MS.NoTrt_F |
| MED26     | 2.10E-07 | -1.3237 | 0.058 | 0.22 | 0.00336  | MS.Trt_vs_MS.NoTrt_F |
| GABRE     | 2.16E-07 | -0.5648 | 0.129 | 0.32 | 0.003447 | MS.Trt_vs_MS.NoTrt_F |
| USP36     | 2.17E-07 | -0.314  | 0.353 | 0.62 | 0.00347  | MS.Trt_vs_MS.NoTrt_F |
| POLR3D    | 2.30E-07 | -0.7725 | 0.345 | 0.58 | 0.003672 | MS.Trt_vs_MS.NoTrt_F |
| BBX       | 2.32E-07 | -0.2961 | 0.273 | 0.54 | 0.003704 | MS.Trt_vs_MS.NoTrt_F |
| PAX6      | 2.33E-07 | -0.5186 | 0.281 | 0.5  | 0.003717 | MS.Trt_vs_MS.NoTrt_F |
| TMBIM6    | 2.35E-07 | -0.3487 | 0.745 | 0.91 | 0.003758 | MS.Trt_vs_MS.NoTrt_F |
| ATP5B     | 2.40E-07 | -0.4615 | 0.345 | 0.61 | 0.003832 | MS.Trt_vs_MS.NoTrt_F |
| TAF7      | 2.42E-07 | -0.5259 | 0.288 | 0.53 | 0.003873 | MS.Trt_vs_MS.NoTrt_F |
| CWC22     | 2.50E-07 | -0.5612 | 0.115 | 0.31 | 0.003992 | MS.Trt_vs_MS.NoTrt_F |
| CRY1      | 2.51E-07 | -0.946  | 0.133 | 0.34 | 0.004006 | MS.Trt_vs_MS.NoTrt_F |
| MTM1      | 2.56E-07 | -0.51   | 0.101 | 0.29 | 0.004081 | MS.Trt_vs_MS.NoTrt_F |
| PLA2G7    | 2.63E-07 | -0.7442 | 0.482 | 0.71 | 0.004208 | MS.Trt_vs_MS.NoTrt_F |
| CYP4F11   | 2.67E-07 | -0.5358 | 0.302 | 0.52 | 0.004271 | MS.Trt_vs_MS.NoTrt_F |
| RALGDS    | 2.78E-07 | -0.6182 | 0.27  | 0.5  | 0.004439 | MS.Trt_vs_MS.NoTrt_F |
| SPOCK2    | 2.88E-07 | -0.3813 | 0.55  | 0.76 | 0.004594 | MS.Trt_vs_MS.NoTrt_F |
| TNFRSF1B  | 2.88E-07 | -0.3266 | 0.759 | 0.91 | 0.004603 | MS.Trt_vs_MS.NoTrt_F |
| ANXA11    | 2.89E-07 | -0.422  | 0.799 | 0.91 | 0.004615 | MS.Trt_vs_MS.NoTrt_F |
| RTN4      | 2.90E-07 | -0.6895 | 0.23  | 0.45 | 0.004633 | MS.Trt_vs_MS.NoTrt_F |

|            |          |         |       |      |          |                      |
|------------|----------|---------|-------|------|----------|----------------------|
| UBE2D3     | 2.91E-07 | -0.3038 | 0.612 | 0.82 | 0.004648 | MS.Trt_vs_MS.NoTrt_F |
| CSRNP1     | 2.96E-07 | -0.6089 | 0.147 | 0.37 | 0.004724 | MS.Trt_vs_MS.NoTrt_F |
| STK4       | 2.97E-07 | -0.3783 | 0.863 | 0.96 | 0.00475  | MS.Trt_vs_MS.NoTrt_F |
| PRKAR1A    | 2.98E-07 | -0.483  | 0.281 | 0.52 | 0.004754 | MS.Trt_vs_MS.NoTrt_F |
| P2RY8      | 3.08E-07 | -0.6227 | 0.374 | 0.61 | 0.004925 | MS.Trt_vs_MS.NoTrt_F |
| SNAP47     | 3.16E-07 | -0.8249 | 0.122 | 0.32 | 0.005041 | MS.Trt_vs_MS.NoTrt_F |
| EEF2       | 3.17E-07 | -0.4488 | 0.817 | 0.94 | 0.005061 | MS.Trt_vs_MS.NoTrt_F |
| HTATIP2    | 3.19E-07 | -0.467  | 0.151 | 0.37 | 0.005103 | MS.Trt_vs_MS.NoTrt_F |
| CCNH       | 3.21E-07 | -0.3592 | 0.223 | 0.46 | 0.005133 | MS.Trt_vs_MS.NoTrt_F |
| PREX1      | 3.26E-07 | -0.6786 | 0.518 | 0.73 | 0.00521  | MS.Trt_vs_MS.NoTrt_F |
| MT2A       | 3.27E-07 | -0.3064 | 0.198 | 0.43 | 0.00522  | MS.Trt_vs_MS.NoTrt_F |
| HNRNPA1    | 3.27E-07 | -0.3309 | 0.629 | 0.92 | 0.00522  | MS.Trt_vs_MS.NoTrt_F |
| DUSP28     | 3.28E-07 | -0.5914 | 0.637 | 0.83 | 0.005232 | MS.Trt_vs_MS.NoTrt_F |
| RAD21      | 3.33E-07 | -0.4741 | 0.309 | 0.57 | 0.005318 | MS.Trt_vs_MS.NoTrt_F |
| ZNF253     | 3.36E-07 | 1.0086  | 0.831 | 0.59 | 0.00536  | MS.Trt_vs_MS.NoTrt_F |
| MAN1A2     | 3.60E-07 | -0.6684 | 0.245 | 0.48 | 0.005758 | MS.Trt_vs_MS.NoTrt_F |
| ZFP36      | 3.62E-07 | -0.5591 | 0.41  | 0.68 | 0.005781 | MS.Trt_vs_MS.NoTrt_F |
| LITAF      | 3.64E-07 | -0.4191 | 0.46  | 0.7  | 0.005819 | MS.Trt_vs_MS.NoTrt_F |
| MYH9       | 3.84E-07 | -0.3555 | 0.719 | 0.95 | 0.006131 | MS.Trt_vs_MS.NoTrt_F |
| WNK1       | 3.88E-07 | -0.3963 | 0.464 | 0.72 | 0.006193 | MS.Trt_vs_MS.NoTrt_F |
| RP11-717K1 | 3.91E-07 | -0.6735 | 0.079 | 0.25 | 0.006252 | MS.Trt_vs_MS.NoTrt_F |
| SCAP       | 4.26E-07 | -0.347  | 0.554 | 0.77 | 0.00681  | MS.Trt_vs_MS.NoTrt_F |
| SLAMF1     | 4.29E-07 | -0.5191 | 0.219 | 0.45 | 0.006858 | MS.Trt_vs_MS.NoTrt_F |
| CTLA4      | 4.41E-07 | -0.3525 | 0.234 | 0.45 | 0.007041 | MS.Trt_vs_MS.NoTrt_F |
| OSER1      | 4.60E-07 | -0.4581 | 0.18  | 0.4  | 0.007354 | MS.Trt_vs_MS.NoTrt_F |
| TIGIT      | 4.64E-07 | -0.3498 | 0.313 | 0.55 | 0.007419 | MS.Trt_vs_MS.NoTrt_F |
| CCDC7      | 4.68E-07 | -0.3821 | 0.101 | 0.29 | 0.007474 | MS.Trt_vs_MS.NoTrt_F |
| ABHD14B    | 4.82E-07 | -0.3434 | 0.165 | 0.39 | 0.0077   | MS.Trt_vs_MS.NoTrt_F |
| SEL1L      | 4.86E-07 | -0.2864 | 0.169 | 0.39 | 0.007758 | MS.Trt_vs_MS.NoTrt_F |
| THAP4      | 4.89E-07 | -0.253  | 0.104 | 0.29 | 0.007805 | MS.Trt_vs_MS.NoTrt_F |
| CBLL1      | 5.01E-07 | -0.3072 | 0.209 | 0.44 | 0.007998 | MS.Trt_vs_MS.NoTrt_F |
| DOCK2      | 5.36E-07 | -0.3123 | 0.356 | 0.63 | 0.008566 | MS.Trt_vs_MS.NoTrt_F |
| C2CD3      | 5.51E-07 | 0.48066 | 0.986 | 0.99 | 0.008797 | MS.Trt_vs_MS.NoTrt_F |
| SGMS1      | 5.86E-07 | -0.8108 | 0.183 | 0.4  | 0.009368 | MS.Trt_vs_MS.NoTrt_F |
| ZRANB2     | 6.17E-07 | -0.3782 | 0.273 | 0.51 | 0.009849 | MS.Trt_vs_MS.NoTrt_F |
| PIP4K2C    | 6.34E-07 | -0.6719 | 0.14  | 0.34 | 0.010132 | MS.Trt_vs_MS.NoTrt_F |
| CCR5       | 6.46E-07 | -1.0556 | 0.086 | 0.25 | 0.010318 | MS.Trt_vs_MS.NoTrt_F |
| HSP90AA1   | 6.56E-07 | -0.2632 | 0.673 | 0.85 | 0.010477 | MS.Trt_vs_MS.NoTrt_F |
| MT-ND4     | 6.61E-07 | 0.54094 | 1     | 1    | 0.010556 | MS.Trt_vs_MS.NoTrt_F |
| C12orf4    | 6.66E-07 | -0.7737 | 0.471 | 0.72 | 0.010631 | MS.Trt_vs_MS.NoTrt_F |

|          |          |         |       |      |          |                      |
|----------|----------|---------|-------|------|----------|----------------------|
| HSPA9    | 6.93E-07 | -0.5103 | 0.439 | 0.66 | 0.011074 | MS.Trt_vs_MS.NoTrt_F |
| RUNX2    | 7.05E-07 | -0.6034 | 0.158 | 0.37 | 0.011255 | MS.Trt_vs_MS.NoTrt_F |
| ZCCHC2   | 7.10E-07 | -2.4033 | 0.072 | 0.23 | 0.011346 | MS.Trt_vs_MS.NoTrt_F |
| ENTPD6   | 7.33E-07 | -0.9938 | 0.112 | 0.29 | 0.011707 | MS.Trt_vs_MS.NoTrt_F |
| GPBP1    | 7.47E-07 | -0.338  | 0.273 | 0.52 | 0.011936 | MS.Trt_vs_MS.NoTrt_F |
| PHC3     | 7.94E-07 | -0.4104 | 0.968 | 0.98 | 0.012677 | MS.Trt_vs_MS.NoTrt_F |
| NT5C     | 8.15E-07 | -0.5471 | 0.129 | 0.32 | 0.013024 | MS.Trt_vs_MS.NoTrt_F |
| OGDH     | 8.31E-07 | -0.6237 | 0.464 | 0.69 | 0.013279 | MS.Trt_vs_MS.NoTrt_F |
| ACSL4    | 8.75E-07 | -1.3532 | 0.133 | 0.33 | 0.013978 | MS.Trt_vs_MS.NoTrt_F |
| RASGRP1  | 8.90E-07 | -0.3072 | 0.345 | 0.6  | 0.014217 | MS.Trt_vs_MS.NoTrt_F |
| ITFG1    | 9.79E-07 | -0.8629 | 0.165 | 0.37 | 0.015635 | MS.Trt_vs_MS.NoTrt_F |
| ANKRD13C | 9.86E-07 | 0.52609 | 0.122 | 0.33 | 0.015753 | MS.Trt_vs_MS.NoTrt_F |
| UBE2L6   | 9.86E-07 | -0.3732 | 0.209 | 0.44 | 0.015756 | MS.Trt_vs_MS.NoTrt_F |
| ZC3H3    | 9.87E-07 | -1.0285 | 0.115 | 0.29 | 0.015758 | MS.Trt_vs_MS.NoTrt_F |
| TBC1D23  | 1.01E-06 | -0.5633 | 0.133 | 0.33 | 0.016101 | MS.Trt_vs_MS.NoTrt_F |
| SLFN5    | 1.02E-06 | -0.6477 | 0.856 | 0.93 | 0.016327 | MS.Trt_vs_MS.NoTrt_F |
| C6orf62  | 1.06E-06 | 0.95396 | 0.838 | 0.85 | 0.016962 | MS.Trt_vs_MS.NoTrt_F |
| BATF     | 1.09E-06 | -0.2626 | 0.137 | 0.34 | 0.017422 | MS.Trt_vs_MS.NoTrt_F |
| RBX1     | 1.10E-06 | 0.45747 | 0.263 | 0.54 | 0.017552 | MS.Trt_vs_MS.NoTrt_F |
| AFF1     | 1.15E-06 | -0.5322 | 0.284 | 0.51 | 0.018335 | MS.Trt_vs_MS.NoTrt_F |
| CATIP    | 1.19E-06 | 0.59942 | 0.892 | 0.91 | 0.019028 | MS.Trt_vs_MS.NoTrt_F |
| ARHGEF10 | 1.23E-06 | 0.64779 | 0.791 | 0.54 | 0.019686 | MS.Trt_vs_MS.NoTrt_F |
| COPS7A   | 1.25E-06 | -0.7612 | 0.23  | 0.44 | 0.019952 | MS.Trt_vs_MS.NoTrt_F |
| SLC51A   | 1.26E-06 | 0.28623 | 0.888 | 0.73 | 0.020131 | MS.Trt_vs_MS.NoTrt_F |
| STMN3    | 1.27E-06 | -0.716  | 0.183 | 0.39 | 0.020285 | MS.Trt_vs_MS.NoTrt_F |
| IDS      | 1.27E-06 | -0.3303 | 0.748 | 0.88 | 0.020297 | MS.Trt_vs_MS.NoTrt_F |
| HS3ST3B1 | 1.28E-06 | -0.2562 | 0.518 | 0.71 | 0.020464 | MS.Trt_vs_MS.NoTrt_F |
| RPSA     | 1.28E-06 | -0.3387 | 0.59  | 0.82 | 0.020524 | MS.Trt_vs_MS.NoTrt_F |
| STAT1    | 1.30E-06 | -0.2641 | 0.335 | 0.58 | 0.020723 | MS.Trt_vs_MS.NoTrt_F |
| RAD54L2  | 1.34E-06 | -0.5621 | 0.665 | 0.81 | 0.021445 | MS.Trt_vs_MS.NoTrt_F |
| NMRK1    | 1.37E-06 | 0.32155 | 0.223 | 0.44 | 0.021826 | MS.Trt_vs_MS.NoTrt_F |
| TRIM37   | 1.39E-06 | -0.6489 | 0.187 | 0.38 | 0.022177 | MS.Trt_vs_MS.NoTrt_F |
| FAM153A  | 1.42E-06 | -0.4392 | 0.403 | 0.65 | 0.022664 | MS.Trt_vs_MS.NoTrt_F |
| TMEM63A  | 1.44E-06 | -0.3068 | 0.665 | 0.88 | 0.022984 | MS.Trt_vs_MS.NoTrt_F |
| TNIP1    | 1.46E-06 | -0.5368 | 0.295 | 0.52 | 0.023311 | MS.Trt_vs_MS.NoTrt_F |
| PEBP1    | 1.47E-06 | -0.5052 | 0.385 | 0.6  | 0.023538 | MS.Trt_vs_MS.NoTrt_F |
| HEBP2    | 1.51E-06 | -0.5608 | 0.324 | 0.53 | 0.024113 | MS.Trt_vs_MS.NoTrt_F |
| STAT5A   | 1.54E-06 | -0.7462 | 0.133 | 0.33 | 0.024566 | MS.Trt_vs_MS.NoTrt_F |
| ACAD9    | 1.55E-06 | -1.0522 | 0.216 | 0.42 | 0.024718 | MS.Trt_vs_MS.NoTrt_F |
| HDAC10   | 1.56E-06 | -1.5756 | 0.133 | 0.32 | 0.024971 | MS.Trt_vs_MS.NoTrt_F |



|            |          |         |       |      |          |                      |
|------------|----------|---------|-------|------|----------|----------------------|
| RP11-307N1 | 1.59E-06 | -0.7718 | 0.079 | 0.24 | 0.025328 | MS.Trt_vs_MS.NoTrt_F |
| CXXC1      | 1.68E-06 | -0.5942 | 0.158 | 0.37 | 0.02683  | MS.Trt_vs_MS.NoTrt_F |
| CRIP2      | 1.70E-06 | -0.2554 | 0.126 | 0.32 | 0.02717  | MS.Trt_vs_MS.NoTrt_F |
| WAS        | 1.72E-06 | -0.4048 | 0.259 | 0.46 | 0.027518 | MS.Trt_vs_MS.NoTrt_F |
| RPS6KA1    | 1.75E-06 | -0.7667 | 0.169 | 0.37 | 0.028019 | MS.Trt_vs_MS.NoTrt_F |
| AATF       | 1.80E-06 | -0.5152 | 0.158 | 0.36 | 0.028713 | MS.Trt_vs_MS.NoTrt_F |
| RALA       | 1.82E-06 | -0.6273 | 0.155 | 0.35 | 0.029024 | MS.Trt_vs_MS.NoTrt_F |
| TBC1D14    | 1.89E-06 | -0.2756 | 0.176 | 0.39 | 0.030199 | MS.Trt_vs_MS.NoTrt_F |
| SLC3A2     | 1.89E-06 | -0.3793 | 0.453 | 0.66 | 0.030252 | MS.Trt_vs_MS.NoTrt_F |
| RARRES3    | 1.90E-06 | -0.3253 | 0.237 | 0.48 | 0.030277 | MS.Trt_vs_MS.NoTrt_F |
| UBQLN2     | 1.94E-06 | -0.5888 | 0.209 | 0.42 | 0.030942 | MS.Trt_vs_MS.NoTrt_F |
| HNRNPDL    | 1.98E-06 | -0.2682 | 0.514 | 0.77 | 0.031631 | MS.Trt_vs_MS.NoTrt_F |
| RFX7       | 2.00E-06 | -0.3954 | 0.147 | 0.34 | 0.031898 | MS.Trt_vs_MS.NoTrt_F |
| CDH8       | 2.07E-06 | -0.3797 | 0.36  | 0.59 | 0.033041 | MS.Trt_vs_MS.NoTrt_F |
| AF011889.5 | 2.13E-06 | -0.5481 | 0.173 | 0.37 | 0.034006 | MS.Trt_vs_MS.NoTrt_F |
| PGK1       | 2.15E-06 | -0.3042 | 0.568 | 0.79 | 0.034265 | MS.Trt_vs_MS.NoTrt_F |
| SARS       | 2.17E-06 | -0.2928 | 0.223 | 0.46 | 0.034614 | MS.Trt_vs_MS.NoTrt_F |
| ACOT8      | 2.17E-06 | -0.7102 | 0.09  | 0.25 | 0.034715 | MS.Trt_vs_MS.NoTrt_F |
| AKIRIN1    | 2.27E-06 | -0.3715 | 0.45  | 0.68 | 0.03622  | MS.Trt_vs_MS.NoTrt_F |
| TNFAIP8L2  | 2.32E-06 | -1.1085 | 0.086 | 0.25 | 0.036984 | MS.Trt_vs_MS.NoTrt_F |
| WHRN       | 2.33E-06 | -0.5712 | 0.108 | 0.28 | 0.03717  | MS.Trt_vs_MS.NoTrt_F |
| R3HCC1     | 2.33E-06 | -0.9991 | 0.108 | 0.28 | 0.037226 | MS.Trt_vs_MS.NoTrt_F |
| ARF5       | 2.39E-06 | -0.2726 | 0.194 | 0.41 | 0.038127 | MS.Trt_vs_MS.NoTrt_F |
| MAF1       | 2.51E-06 | -0.2733 | 0.158 | 0.36 | 0.040164 | MS.Trt_vs_MS.NoTrt_F |
| CD48       | 2.64E-06 | -0.3275 | 0.252 | 0.49 | 0.042095 | MS.Trt_vs_MS.NoTrt_F |
| RIMS1      | 2.72E-06 | -0.4521 | 0.212 | 0.4  | 0.043438 | MS.Trt_vs_MS.NoTrt_F |
| PFKP       | 2.84E-06 | -0.5478 | 0.23  | 0.44 | 0.0453   | MS.Trt_vs_MS.NoTrt_F |
| PPP1R1C    | 2.84E-06 | -0.4195 | 0.23  | 0.43 | 0.045408 | MS.Trt_vs_MS.NoTrt_F |
| SNRNP40    | 2.95E-06 | -0.3081 | 0.165 | 0.36 | 0.047082 | MS.Trt_vs_MS.NoTrt_F |
| HDLBP      | 3.11E-06 | -0.477  | 0.432 | 0.6  | 0.049653 | MS.Trt_vs_MS.NoTrt_F |
| EIF4A3     | 3.15E-06 | -1.2425 | 0.665 | 0.8  | 0.050276 | MS.Trt_vs_MS.NoTrt_F |
| FMNL2      | 3.22E-06 | -0.615  | 0.173 | 0.35 | 0.051485 | MS.Trt_vs_MS.NoTrt_F |
| FNBP4      | 3.23E-06 | -0.5601 | 0.424 | 0.64 | 0.05158  | MS.Trt_vs_MS.NoTrt_F |
| EXOC3L4    | 3.31E-06 | -0.8435 | 0.137 | 0.31 | 0.05285  | MS.Trt_vs_MS.NoTrt_F |
| ANP32A     | 3.36E-06 | -0.9836 | 0.205 | 0.4  | 0.053653 | MS.Trt_vs_MS.NoTrt_F |
| ANO9       | 3.46E-06 | -0.4724 | 0.227 | 0.44 | 0.055336 | MS.Trt_vs_MS.NoTrt_F |
| TRAF1      | 3.48E-06 | 0.26531 | 0.273 | 0.51 | 0.055526 | MS.Trt_vs_MS.NoTrt_F |
| MYO9A      | 3.62E-06 | -0.5897 | 0.27  | 0.49 | 0.057817 | MS.Trt_vs_MS.NoTrt_F |
| EPM2AIP1   | 3.62E-06 | -0.7157 | 0.23  | 0.42 | 0.057893 | MS.Trt_vs_MS.NoTrt_F |
| PRKG2      | 3.69E-06 | -0.7843 | 0.295 | 0.54 | 0.058979 | MS.Trt_vs_MS.NoTrt_F |

|          |          |         |       |      |          |                      |
|----------|----------|---------|-------|------|----------|----------------------|
| PSMD7    | 3.99E-06 | -0.5322 | 0.266 | 0.48 | 0.06381  | MS.Trt_vs_MS.NoTrt_F |
| SLC41A3  | 4.03E-06 | -0.5993 | 0.273 | 0.49 | 0.064435 | MS.Trt_vs_MS.NoTrt_F |
| GMIP     | 4.15E-06 | -1.0644 | 0.191 | 0.39 | 0.066316 | MS.Trt_vs_MS.NoTrt_F |
| UBL7     | 4.23E-06 | -0.5152 | 0.137 | 0.32 | 0.067592 | MS.Trt_vs_MS.NoTrt_F |
| SYT17    | 4.32E-06 | -0.37   | 0.277 | 0.48 | 0.069051 | MS.Trt_vs_MS.NoTrt_F |
| PTAR1    | 4.39E-06 | -0.8272 | 0.137 | 0.32 | 0.07019  | MS.Trt_vs_MS.NoTrt_F |
| C15orf53 | 4.46E-06 | -0.8766 | 0.115 | 0.28 | 0.071282 | MS.Trt_vs_MS.NoTrt_F |
| EIF3D    | 4.63E-06 | -0.3157 | 0.371 | 0.6  | 0.073948 | MS.Trt_vs_MS.NoTrt_F |
| TMED7    | 4.68E-06 | -1.2323 | 0.104 | 0.27 | 0.074803 | MS.Trt_vs_MS.NoTrt_F |
| ADSS     | 4.70E-06 | -0.2727 | 0.137 | 0.32 | 0.075063 | MS.Trt_vs_MS.NoTrt_F |
| RRM1     | 4.72E-06 | -0.2633 | 0.331 | 0.55 | 0.075439 | MS.Trt_vs_MS.NoTrt_F |
| SP2      | 4.76E-06 | -1.3482 | 0.277 | 0.48 | 0.076039 | MS.Trt_vs_MS.NoTrt_F |
| MSANTD4  | 4.79E-06 | -1.6116 | 0.058 | 0.19 | 0.076548 | MS.Trt_vs_MS.NoTrt_F |
| IKBKE    | 4.80E-06 | -0.2959 | 0.291 | 0.53 | 0.076641 | MS.Trt_vs_MS.NoTrt_F |
| ULK3     | 4.86E-06 | -0.5578 | 0.144 | 0.33 | 0.07768  | MS.Trt_vs_MS.NoTrt_F |
| LAMP1    | 4.86E-06 | -0.9513 | 0.349 | 0.54 | 0.077687 | MS.Trt_vs_MS.NoTrt_F |
| BORCS5   | 4.94E-06 | -0.5977 | 0.597 | 0.79 | 0.07893  | MS.Trt_vs_MS.NoTrt_F |
| RPL7A    | 5.01E-06 | -0.3246 | 0.68  | 0.92 | 0.080023 | MS.Trt_vs_MS.NoTrt_F |
| ASUN     | 5.10E-06 | -0.5755 | 0.126 | 0.3  | 0.081495 | MS.Trt_vs_MS.NoTrt_F |
| EHD2     | 5.24E-06 | -0.6523 | 0.799 | 0.91 | 0.083676 | MS.Trt_vs_MS.NoTrt_F |
| GIMAP2   | 5.31E-06 | -0.5109 | 0.853 | 0.91 | 0.084757 | MS.Trt_vs_MS.NoTrt_F |
| BTG1     | 5.32E-06 | -0.3241 | 0.619 | 0.85 | 0.084955 | MS.Trt_vs_MS.NoTrt_F |
| NDUFA4   | 5.56E-06 | 0.26861 | 0.554 | 0.77 | 0.08876  | MS.Trt_vs_MS.NoTrt_F |
| NDUFA6   | 5.61E-06 | -0.284  | 0.23  | 0.45 | 0.089588 | MS.Trt_vs_MS.NoTrt_F |
| RALGAPB  | 5.61E-06 | -0.2993 | 0.18  | 0.38 | 0.089659 | MS.Trt_vs_MS.NoTrt_F |
| SLC44A5  | 5.64E-06 | 0.49139 | 0.817 | 0.83 | 0.090063 | MS.Trt_vs_MS.NoTrt_F |
| INTS9    | 5.65E-06 | -0.8819 | 0.112 | 0.28 | 0.090264 | MS.Trt_vs_MS.NoTrt_F |
| LBH      | 5.65E-06 | -0.3713 | 0.651 | 0.82 | 0.090301 | MS.Trt_vs_MS.NoTrt_F |
| RPL13A   | 5.66E-06 | -0.2924 | 0.813 | 0.99 | 0.090343 | MS.Trt_vs_MS.NoTrt_F |
| POLR2I   | 5.82E-06 | -0.4556 | 0.133 | 0.31 | 0.092904 | MS.Trt_vs_MS.NoTrt_F |
| CHCHD3   | 5.97E-06 | -0.7049 | 0.129 | 0.3  | 0.09528  | MS.Trt_vs_MS.NoTrt_F |
| NFATC3   | 6.13E-06 | -0.2793 | 0.629 | 0.77 | 0.097876 | MS.Trt_vs_MS.NoTrt_F |
| PCGF3    | 6.13E-06 | -0.6277 | 0.173 | 0.36 | 0.097973 | MS.Trt_vs_MS.NoTrt_F |
| FBXW5    | 6.24E-06 | -0.3098 | 0.194 | 0.4  | 0.099735 | MS.Trt_vs_MS.NoTrt_F |
| TCERG1   | 6.30E-06 | -0.345  | 0.248 | 0.46 | 0.100566 | MS.Trt_vs_MS.NoTrt_F |
| BTLA     | 6.35E-06 | 1.10494 | 0.122 | 0.28 | 0.101419 | MS.Trt_vs_MS.NoTrt_F |
| NEBL     | 6.40E-06 | -0.9706 | 0.216 | 0.42 | 0.102189 | MS.Trt_vs_MS.NoTrt_F |
| ACLY     | 6.61E-06 | -0.4883 | 0.201 | 0.4  | 0.105529 | MS.Trt_vs_MS.NoTrt_F |
| UTRN     | 6.70E-06 | -0.6076 | 0.421 | 0.62 | 0.106951 | MS.Trt_vs_MS.NoTrt_F |
| BST2     | 6.72E-06 | -0.4297 | 0.155 | 0.34 | 0.107345 | MS.Trt_vs_MS.NoTrt_F |

|         |          |         |       |      |          |                      |
|---------|----------|---------|-------|------|----------|----------------------|
| PRRC2B  | 6.79E-06 | -0.5413 | 0.245 | 0.46 | 0.108385 | MS.Trt_vs_MS.NoTrt_F |
| EPHB4   | 6.85E-06 | 0.66496 | 0.813 | 0.8  | 0.109483 | MS.Trt_vs_MS.NoTrt_F |
| RNF20   | 6.89E-06 | -1.0145 | 0.122 | 0.29 | 0.10999  | MS.Trt_vs_MS.NoTrt_F |
| UBXN11  | 6.98E-06 | -0.2939 | 0.173 | 0.37 | 0.111416 | MS.Trt_vs_MS.NoTrt_F |
| PTP4A1  | 7.02E-06 | -0.3228 | 0.198 | 0.4  | 0.1122   | MS.Trt_vs_MS.NoTrt_F |
| COX10   | 7.24E-06 | -0.9099 | 0.101 | 0.26 | 0.115716 | MS.Trt_vs_MS.NoTrt_F |
| NDUFC1  | 7.30E-06 | 0.33226 | 0.191 | 0.4  | 0.116546 | MS.Trt_vs_MS.NoTrt_F |
| RASA1   | 7.30E-06 | -0.6371 | 0.191 | 0.38 | 0.116581 | MS.Trt_vs_MS.NoTrt_F |
| SF3A1   | 7.36E-06 | -0.4883 | 0.277 | 0.48 | 0.117534 | MS.Trt_vs_MS.NoTrt_F |
| CEP85L  | 7.42E-06 | -0.574  | 0.219 | 0.41 | 0.118447 | MS.Trt_vs_MS.NoTrt_F |
| C2orf91 | 7.65E-06 | -0.3872 | 0.403 | 0.59 | 0.122131 | MS.Trt_vs_MS.NoTrt_F |
| HDAC3   | 7.70E-06 | -0.4094 | 0.122 | 0.29 | 0.122918 | MS.Trt_vs_MS.NoTrt_F |
| CD7     | 7.70E-06 | -0.3937 | 0.219 | 0.41 | 0.122991 | MS.Trt_vs_MS.NoTrt_F |
| TADA3   | 7.87E-06 | -0.7092 | 0.529 | 0.74 | 0.125733 | MS.Trt_vs_MS.NoTrt_F |
| GIMAP1  | 7.88E-06 | -0.5206 | 0.378 | 0.58 | 0.125801 | MS.Trt_vs_MS.NoTrt_F |
| AKAP8L  | 7.89E-06 | -0.7831 | 0.097 | 0.25 | 0.126069 | MS.Trt_vs_MS.NoTrt_F |
| UQCRFS1 | 7.89E-06 | -0.4252 | 0.194 | 0.39 | 0.126101 | MS.Trt_vs_MS.NoTrt_F |
| YJEFN3  | 7.90E-06 | -2.4733 | 0.054 | 0.18 | 0.126217 | MS.Trt_vs_MS.NoTrt_F |
| SRA1    | 8.00E-06 | -0.5322 | 0.126 | 0.29 | 0.127713 | MS.Trt_vs_MS.NoTrt_F |
| RIN3    | 8.01E-06 | -0.5432 | 0.176 | 0.37 | 0.127893 | MS.Trt_vs_MS.NoTrt_F |
| SNX9    | 8.23E-06 | -0.47   | 0.14  | 0.32 | 0.131455 | MS.Trt_vs_MS.NoTrt_F |
| MKRN2   | 8.32E-06 | -0.9362 | 0.09  | 0.24 | 0.13292  | MS.Trt_vs_MS.NoTrt_F |
| CECR1   | 8.44E-06 | -1.0564 | 0.363 | 0.59 | 0.134874 | MS.Trt_vs_MS.NoTrt_F |
| HAX1    | 8.86E-06 | -0.2697 | 0.18  | 0.38 | 0.141596 | MS.Trt_vs_MS.NoTrt_F |
| SAMD9   | 8.94E-06 | -0.5043 | 0.147 | 0.33 | 0.142743 | MS.Trt_vs_MS.NoTrt_F |
| IL21R   | 8.94E-06 | -0.6075 | 0.522 | 0.75 | 0.142877 | MS.Trt_vs_MS.NoTrt_F |
| TMX2    | 9.02E-06 | -0.596  | 0.115 | 0.28 | 0.144028 | MS.Trt_vs_MS.NoTrt_F |
| TTC14   | 9.18E-06 | -0.7947 | 0.353 | 0.54 | 0.1466   | MS.Trt_vs_MS.NoTrt_F |
| MPC1    | 9.27E-06 | -0.508  | 0.119 | 0.28 | 0.148081 | MS.Trt_vs_MS.NoTrt_F |
| ACBD6   | 9.40E-06 | -0.3147 | 0.335 | 0.55 | 0.150128 | MS.Trt_vs_MS.NoTrt_F |
| OTUD5   | 9.47E-06 | -0.2926 | 0.137 | 0.32 | 0.151303 | MS.Trt_vs_MS.NoTrt_F |
| NUTF2   | 9.53E-06 | -0.325  | 0.169 | 0.35 | 0.152187 | MS.Trt_vs_MS.NoTrt_F |
| ST8SIA3 | 9.56E-06 | -0.3519 | 0.112 | 0.27 | 0.15267  | MS.Trt_vs_MS.NoTrt_F |
| SOCS3   | 9.88E-06 | -0.4605 | 0.14  | 0.32 | 0.157867 | MS.Trt_vs_MS.NoTrt_F |
| ZNF331  | 1.00E-05 | -0.8128 | 0.615 | 0.78 | 0.160022 | MS.Trt_vs_MS.NoTrt_F |
| CLASRP  | 1.00E-05 | -1.3558 | 0.147 | 0.32 | 0.160156 | MS.Trt_vs_MS.NoTrt_F |
| HSPE1   | 1.01E-05 | -0.2634 | 0.259 | 0.46 | 0.160722 | MS.Trt_vs_MS.NoTrt_F |
| RANBP2  | 1.01E-05 | -0.3854 | 0.349 | 0.6  | 0.162061 | MS.Trt_vs_MS.NoTrt_F |
| MYL12B  | 1.02E-05 | -0.288  | 0.489 | 0.75 | 0.163259 | MS.Trt_vs_MS.NoTrt_F |
| SMYD3   | 1.04E-05 | -0.7628 | 0.147 | 0.33 | 0.165681 | MS.Trt_vs_MS.NoTrt_F |

|          |          |         |       |      |          |                      |
|----------|----------|---------|-------|------|----------|----------------------|
| JRK      | 1.04E-05 | -1.4194 | 0.353 | 0.55 | 0.165867 | MS.Trt_vs_MS.NoTrt_F |
| GLTSCR1L | 1.04E-05 | -0.428  | 0.173 | 0.37 | 0.166405 | MS.Trt_vs_MS.NoTrt_F |
| ATG4B    | 1.04E-05 | -0.5422 | 0.183 | 0.38 | 0.166529 | MS.Trt_vs_MS.NoTrt_F |
| ACAD11   | 1.05E-05 | -0.6811 | 0.165 | 0.35 | 0.167052 | MS.Trt_vs_MS.NoTrt_F |
| ITPA     | 1.11E-05 | -0.3754 | 0.151 | 0.33 | 0.177926 | MS.Trt_vs_MS.NoTrt_F |
| PSMG2    | 1.14E-05 | -0.2719 | 0.165 | 0.35 | 0.181879 | MS.Trt_vs_MS.NoTrt_F |
| IRF2     | 1.15E-05 | -0.6034 | 0.32  | 0.53 | 0.184467 | MS.Trt_vs_MS.NoTrt_F |
| MAPK10   | 1.16E-05 | -0.2941 | 0.155 | 0.33 | 0.184931 | MS.Trt_vs_MS.NoTrt_F |
| LRRC37B  | 1.16E-05 | 0.39094 | 0.583 | 0.8  | 0.185224 | MS.Trt_vs_MS.NoTrt_F |
| UBAP1    | 1.17E-05 | -0.4615 | 0.133 | 0.3  | 0.186689 | MS.Trt_vs_MS.NoTrt_F |
| CAMK4    | 1.20E-05 | -0.3033 | 0.586 | 0.76 | 0.191814 | MS.Trt_vs_MS.NoTrt_F |
| NSMAF    | 1.20E-05 | -0.4508 | 0.198 | 0.39 | 0.191995 | MS.Trt_vs_MS.NoTrt_F |
| TOMM20   | 1.21E-05 | -0.3899 | 0.194 | 0.38 | 0.193445 | MS.Trt_vs_MS.NoTrt_F |
| TCP11L2  | 1.25E-05 | -0.8501 | 0.248 | 0.42 | 0.19992  | MS.Trt_vs_MS.NoTrt_F |
| KLF6     | 1.29E-05 | -0.319  | 0.68  | 0.87 | 0.205321 | MS.Trt_vs_MS.NoTrt_F |
| MUC15    | 1.31E-05 | -0.3522 | 0.104 | 0.25 | 0.209651 | MS.Trt_vs_MS.NoTrt_F |
| CHKB     | 1.35E-05 | -0.5026 | 0.245 | 0.44 | 0.216175 | MS.Trt_vs_MS.NoTrt_F |
| LIMK2    | 1.35E-05 | -0.3477 | 0.187 | 0.38 | 0.216263 | MS.Trt_vs_MS.NoTrt_F |
| ZNF281   | 1.37E-05 | -0.9774 | 0.094 | 0.24 | 0.218283 | MS.Trt_vs_MS.NoTrt_F |
| PHF14    | 1.37E-05 | -1.1339 | 0.119 | 0.28 | 0.218961 | MS.Trt_vs_MS.NoTrt_F |
| PPP6R2   | 1.38E-05 | -0.3936 | 0.288 | 0.5  | 0.220395 | MS.Trt_vs_MS.NoTrt_F |
| ARRDC5   | 1.39E-05 | -0.3387 | 0.097 | 0.25 | 0.221865 | MS.Trt_vs_MS.NoTrt_F |
| TAF1C    | 1.46E-05 | -1.0033 | 0.108 | 0.27 | 0.232549 | MS.Trt_vs_MS.NoTrt_F |
| TIFA     | 1.49E-05 | -0.3176 | 0.104 | 0.27 | 0.237448 | MS.Trt_vs_MS.NoTrt_F |
| NIM1K    | 1.49E-05 | 0.41583 | 0.799 | 0.62 | 0.238309 | MS.Trt_vs_MS.NoTrt_F |
| PISD     | 1.51E-05 | -0.3669 | 0.119 | 0.28 | 0.240679 | MS.Trt_vs_MS.NoTrt_F |
| KIAA0141 | 1.51E-05 | -0.6194 | 0.133 | 0.3  | 0.241818 | MS.Trt_vs_MS.NoTrt_F |
| YWHAG    | 1.54E-05 | -0.626  | 0.119 | 0.28 | 0.245747 | MS.Trt_vs_MS.NoTrt_F |
| CD3G     | 1.54E-05 | 0.88709 | 0.953 | 0.98 | 0.246445 | MS.Trt_vs_MS.NoTrt_F |
| HNF4G    | 1.55E-05 | -0.3148 | 0.223 | 0.41 | 0.246809 | MS.Trt_vs_MS.NoTrt_F |
| RARA     | 1.56E-05 | -0.8803 | 0.108 | 0.26 | 0.248551 | MS.Trt_vs_MS.NoTrt_F |
| PNPLA6   | 1.59E-05 | 0.25931 | 0.122 | 0.29 | 0.25372  | MS.Trt_vs_MS.NoTrt_F |
| PTTG1IP  | 1.61E-05 | -0.282  | 0.158 | 0.34 | 0.257901 | MS.Trt_vs_MS.NoTrt_F |
| GDF5OS   | 1.62E-05 | -0.3288 | 0.299 | 0.49 | 0.258425 | MS.Trt_vs_MS.NoTrt_F |
| DNAH1    | 1.62E-05 | -0.4998 | 0.129 | 0.3  | 0.259221 | MS.Trt_vs_MS.NoTrt_F |
| EPSTI1   | 1.63E-05 | -0.5271 | 0.14  | 0.32 | 0.259684 | MS.Trt_vs_MS.NoTrt_F |
| SAMD9L   | 1.64E-05 | -0.3602 | 0.162 | 0.34 | 0.261585 | MS.Trt_vs_MS.NoTrt_F |
| TMEM55A  | 1.64E-05 | -1.459  | 0.068 | 0.2  | 0.262234 | MS.Trt_vs_MS.NoTrt_F |
| RASA4    | 1.67E-05 | 0.25124 | 0.586 | 0.81 | 0.26604  | MS.Trt_vs_MS.NoTrt_F |
| MAPK6    | 1.67E-05 | 0.75499 | 0.421 | 0.59 | 0.267054 | MS.Trt_vs_MS.NoTrt_F |

|           |          |         |       |      |          |                      |
|-----------|----------|---------|-------|------|----------|----------------------|
| STIM2     | 1.69E-05 | -0.3947 | 0.137 | 0.3  | 0.269167 | MS.Trt_vs_MS.NoTrt_F |
| GCN1      | 1.70E-05 | -1.0178 | 0.119 | 0.28 | 0.272288 | MS.Trt_vs_MS.NoTrt_F |
| PGM2      | 1.72E-05 | -0.4546 | 0.108 | 0.27 | 0.275292 | MS.Trt_vs_MS.NoTrt_F |
| MRPL28    | 1.72E-05 | -0.8364 | 0.104 | 0.25 | 0.275319 | MS.Trt_vs_MS.NoTrt_F |
| 4-Sep     | 1.73E-05 | 0.32054 | 0.331 | 0.5  | 0.276835 | MS.Trt_vs_MS.NoTrt_F |
| PRKACB    | 1.74E-05 | -0.4112 | 0.216 | 0.41 | 0.277414 | MS.Trt_vs_MS.NoTrt_F |
| HSPA4     | 1.79E-05 | -0.6283 | 0.349 | 0.53 | 0.286693 | MS.Trt_vs_MS.NoTrt_F |
| LDLRAD4   | 1.87E-05 | -0.6048 | 0.353 | 0.55 | 0.298788 | MS.Trt_vs_MS.NoTrt_F |
| VAMP2     | 1.92E-05 | -0.3803 | 0.367 | 0.61 | 0.306709 | MS.Trt_vs_MS.NoTrt_F |
| HP1BP3    | 1.94E-05 | -0.3043 | 0.82  | 0.93 | 0.309763 | MS.Trt_vs_MS.NoTrt_F |
| PREP      | 1.95E-05 | -0.285  | 0.104 | 0.26 | 0.311993 | MS.Trt_vs_MS.NoTrt_F |
| 2-Sep     | 1.98E-05 | -0.2586 | 0.874 | 0.93 | 0.316462 | MS.Trt_vs_MS.NoTrt_F |
| RRN3      | 2.04E-05 | 0.38972 | 0.263 | 0.48 | 0.325839 | MS.Trt_vs_MS.NoTrt_F |
| MAP1LC3B2 | 2.06E-05 | 0.43451 | 0.237 | 0.45 | 0.32893  | MS.Trt_vs_MS.NoTrt_F |
| WDR70     | 2.08E-05 | -0.6303 | 0.234 | 0.43 | 0.331777 | MS.Trt_vs_MS.NoTrt_F |
| ELP2      | 2.09E-05 | -0.4969 | 0.572 | 0.74 | 0.333569 | MS.Trt_vs_MS.NoTrt_F |
| JUND      | 2.12E-05 | -0.3849 | 0.32  | 0.53 | 0.338499 | MS.Trt_vs_MS.NoTrt_F |
| SUCLG2    | 2.13E-05 | -0.367  | 0.194 | 0.38 | 0.339621 | MS.Trt_vs_MS.NoTrt_F |
| SUCO      | 2.13E-05 | -0.9239 | 0.104 | 0.25 | 0.340773 | MS.Trt_vs_MS.NoTrt_F |
| AMDHD2    | 2.15E-05 | -1.319  | 0.086 | 0.23 | 0.34399  | MS.Trt_vs_MS.NoTrt_F |
| PRPF18    | 2.17E-05 | -0.7354 | 0.112 | 0.27 | 0.346144 | MS.Trt_vs_MS.NoTrt_F |
| NPIP8     | 2.18E-05 | -0.374  | 0.108 | 0.26 | 0.347646 | MS.Trt_vs_MS.NoTrt_F |
| MSN       | 2.19E-05 | -0.3399 | 0.55  | 0.75 | 0.349096 | MS.Trt_vs_MS.NoTrt_F |
| PPFIBP2   | 2.19E-05 | -0.9859 | 0.169 | 0.34 | 0.349867 | MS.Trt_vs_MS.NoTrt_F |
| NBEAL2    | 2.19E-05 | -0.3401 | 0.216 | 0.41 | 0.350212 | MS.Trt_vs_MS.NoTrt_F |
| CCDC13    | 2.22E-05 | -0.6833 | 0.259 | 0.47 | 0.354247 | MS.Trt_vs_MS.NoTrt_F |
| EXOC4     | 2.22E-05 | -0.5148 | 0.486 | 0.69 | 0.354764 | MS.Trt_vs_MS.NoTrt_F |
| NFRKB     | 2.23E-05 | -0.4839 | 0.133 | 0.3  | 0.355449 | MS.Trt_vs_MS.NoTrt_F |
| CABIN1    | 2.26E-05 | -0.4768 | 0.223 | 0.41 | 0.361639 | MS.Trt_vs_MS.NoTrt_F |
| EFCAB6    | 2.29E-05 | -0.2511 | 0.349 | 0.56 | 0.365047 | MS.Trt_vs_MS.NoTrt_F |
| MRPS2     | 2.29E-05 | -1.479  | 0.072 | 0.2  | 0.365325 | MS.Trt_vs_MS.NoTrt_F |
| PPP4R3B   | 2.29E-05 | -0.3438 | 0.403 | 0.58 | 0.365617 | MS.Trt_vs_MS.NoTrt_F |
| FAM84B    | 2.34E-05 | -0.8869 | 0.054 | 0.18 | 0.373479 | MS.Trt_vs_MS.NoTrt_F |
| FXN       | 2.37E-05 | -0.4542 | 0.158 | 0.33 | 0.37864  | MS.Trt_vs_MS.NoTrt_F |
| NME3      | 2.38E-05 | -0.433  | 0.108 | 0.26 | 0.379843 | MS.Trt_vs_MS.NoTrt_F |
| SMNDC1    | 2.39E-05 | -0.6791 | 0.126 | 0.29 | 0.382303 | MS.Trt_vs_MS.NoTrt_F |
| ARHGEF5   | 2.41E-05 | -0.4162 | 0.101 | 0.25 | 0.38457  | MS.Trt_vs_MS.NoTrt_F |
| RPTOR     | 2.41E-05 | 0.32046 | 0.338 | 0.53 | 0.385357 | MS.Trt_vs_MS.NoTrt_F |
| GPR183    | 2.45E-05 | -0.3655 | 0.371 | 0.59 | 0.39073  | MS.Trt_vs_MS.NoTrt_F |
| HEATR1    | 2.47E-05 | 0.47126 | 0.137 | 0.3  | 0.395035 | MS.Trt_vs_MS.NoTrt_F |

|           |          |         |       |      |          |                      |
|-----------|----------|---------|-------|------|----------|----------------------|
| PPM1M     | 2.48E-05 | -0.4465 | 0.14  | 0.31 | 0.396015 | MS.Trt_vs_MS.NoTrt_F |
| DDX28     | 2.49E-05 | -1.3213 | 0.061 | 0.19 | 0.39729  | MS.Trt_vs_MS.NoTrt_F |
| SEPHS2    | 2.57E-05 | -0.6205 | 0.108 | 0.26 | 0.410888 | MS.Trt_vs_MS.NoTrt_F |
| WNT7B     | 2.57E-05 | -0.3412 | 0.259 | 0.45 | 0.411304 | MS.Trt_vs_MS.NoTrt_F |
| CNOT11    | 2.58E-05 | -1.0437 | 0.119 | 0.27 | 0.411926 | MS.Trt_vs_MS.NoTrt_F |
| SLC39A10  | 2.59E-05 | -0.4648 | 0.176 | 0.36 | 0.4143   | MS.Trt_vs_MS.NoTrt_F |
| TRPC4AP   | 2.59E-05 | -0.2949 | 0.259 | 0.46 | 0.414404 | MS.Trt_vs_MS.NoTrt_F |
| ZNF592    | 2.64E-05 | -0.3833 | 0.158 | 0.34 | 0.421216 | MS.Trt_vs_MS.NoTrt_F |
| ZDHHC5    | 2.66E-05 | -0.3675 | 0.108 | 0.26 | 0.424948 | MS.Trt_vs_MS.NoTrt_F |
| FTSJ3     | 2.67E-05 | -0.2957 | 0.09  | 0.23 | 0.425729 | MS.Trt_vs_MS.NoTrt_F |
| FIP1L1    | 2.67E-05 | -0.5    | 0.223 | 0.41 | 0.425772 | MS.Trt_vs_MS.NoTrt_F |
| OXLD1     | 2.67E-05 | -0.4688 | 0.108 | 0.26 | 0.426083 | MS.Trt_vs_MS.NoTrt_F |
| NBAS      | 2.69E-05 | -0.4168 | 0.158 | 0.33 | 0.429602 | MS.Trt_vs_MS.NoTrt_F |
| EBAG9     | 2.70E-05 | -0.5069 | 0.094 | 0.24 | 0.431817 | MS.Trt_vs_MS.NoTrt_F |
| CCT4      | 2.75E-05 | -0.3916 | 0.241 | 0.43 | 0.438738 | MS.Trt_vs_MS.NoTrt_F |
| MAP3K4    | 2.76E-05 | -0.4802 | 0.158 | 0.33 | 0.440863 | MS.Trt_vs_MS.NoTrt_F |
| PCDH10    | 2.77E-05 | -0.3984 | 0.122 | 0.27 | 0.442086 | MS.Trt_vs_MS.NoTrt_F |
| MPZL3     | 2.77E-05 | -1.031  | 0.633 | 0.76 | 0.442551 | MS.Trt_vs_MS.NoTrt_F |
| LDHA      | 2.78E-05 | -0.3678 | 0.655 | 0.81 | 0.444611 | MS.Trt_vs_MS.NoTrt_F |
| CHURC1    | 2.79E-05 | 0.38271 | 0.629 | 0.82 | 0.445407 | MS.Trt_vs_MS.NoTrt_F |
| LRFN1     | 2.79E-05 | -1.0062 | 0.108 | 0.25 | 0.446401 | MS.Trt_vs_MS.NoTrt_F |
| KCNA3     | 2.83E-05 | -0.3673 | 0.216 | 0.41 | 0.451614 | MS.Trt_vs_MS.NoTrt_F |
| TMEM35B   | 2.83E-05 | -0.4044 | 0.162 | 0.34 | 0.451981 | MS.Trt_vs_MS.NoTrt_F |
| MMADHC    | 2.85E-05 | -0.2826 | 0.356 | 0.54 | 0.455708 | MS.Trt_vs_MS.NoTrt_F |
| ATOX1     | 2.85E-05 | -0.261  | 0.212 | 0.39 | 0.455883 | MS.Trt_vs_MS.NoTrt_F |
| TMEM147   | 2.87E-05 | 0.25593 | 0.133 | 0.3  | 0.458314 | MS.Trt_vs_MS.NoTrt_F |
| HEATR5B   | 2.87E-05 | -0.2545 | 0.349 | 0.58 | 0.459021 | MS.Trt_vs_MS.NoTrt_F |
| DCTN1     | 2.91E-05 | -0.3892 | 0.216 | 0.4  | 0.464282 | MS.Trt_vs_MS.NoTrt_F |
| VAMP7     | 2.95E-05 | -0.4623 | 0.094 | 0.24 | 0.470785 | MS.Trt_vs_MS.NoTrt_F |
| CCDC186   | 2.95E-05 | -0.3083 | 0.568 | 0.71 | 0.470887 | MS.Trt_vs_MS.NoTrt_F |
| CORO7-PAN | 2.95E-05 | -0.7254 | 0.101 | 0.25 | 0.470892 | MS.Trt_vs_MS.NoTrt_F |
| IL7       | 2.99E-05 | -0.9054 | 0.076 | 0.21 | 0.4783   | MS.Trt_vs_MS.NoTrt_F |
| PPP2R1A   | 3.01E-05 | -0.4788 | 0.64  | 0.8  | 0.480816 | MS.Trt_vs_MS.NoTrt_F |
| TCHP      | 3.07E-05 | -0.5687 | 0.446 | 0.62 | 0.489758 | MS.Trt_vs_MS.NoTrt_F |
| HACD3     | 3.07E-05 | -0.7375 | 0.665 | 0.81 | 0.489822 | MS.Trt_vs_MS.NoTrt_F |
| PINLYP    | 3.10E-05 | -0.2866 | 0.511 | 0.69 | 0.494454 | MS.Trt_vs_MS.NoTrt_F |
| RIOK1     | 3.11E-05 | -0.7069 | 0.09  | 0.23 | 0.496573 | MS.Trt_vs_MS.NoTrt_F |
| SSNA1     | 3.11E-05 | -0.3889 | 0.14  | 0.31 | 0.496763 | MS.Trt_vs_MS.NoTrt_F |
| SGPP1     | 3.15E-05 | 0.43412 | 0.086 | 0.23 | 0.503202 | MS.Trt_vs_MS.NoTrt_F |
| KPNB1     | 3.15E-05 | -0.6843 | 0.644 | 0.74 | 0.503335 | MS.Trt_vs_MS.NoTrt_F |

|           |          |         |       |      |          |                      |
|-----------|----------|---------|-------|------|----------|----------------------|
| FAM13B    | 3.16E-05 | -0.8054 | 0.367 | 0.54 | 0.505002 | MS.Trt_vs_MS.NoTrt_F |
| SNRK      | 3.19E-05 | -0.7091 | 0.45  | 0.63 | 0.508822 | MS.Trt_vs_MS.NoTrt_F |
| TTC31     | 3.22E-05 | -1.1864 | 0.187 | 0.35 | 0.515051 | MS.Trt_vs_MS.NoTrt_F |
| RAN       | 3.25E-05 | -0.3387 | 0.371 | 0.58 | 0.518658 | MS.Trt_vs_MS.NoTrt_F |
| DTNBP1    | 3.26E-05 | -0.7353 | 0.086 | 0.23 | 0.520053 | MS.Trt_vs_MS.NoTrt_F |
| NUP205    | 3.29E-05 | -1.2624 | 0.147 | 0.31 | 0.525707 | MS.Trt_vs_MS.NoTrt_F |
| PHF3      | 3.30E-05 | -0.2711 | 0.403 | 0.6  | 0.52638  | MS.Trt_vs_MS.NoTrt_F |
| MARVELD2  | 3.31E-05 | -0.2627 | 0.536 | 0.72 | 0.528751 | MS.Trt_vs_MS.NoTrt_F |
| ARL17B    | 3.38E-05 | 0.28835 | 0.712 | 0.85 | 0.54019  | MS.Trt_vs_MS.NoTrt_F |
| PICALM    | 3.44E-05 | -0.4733 | 0.201 | 0.39 | 0.549592 | MS.Trt_vs_MS.NoTrt_F |
| RCBTB2    | 3.47E-05 | -0.329  | 0.115 | 0.27 | 0.554825 | MS.Trt_vs_MS.NoTrt_F |
| CERK      | 3.50E-05 | -0.4504 | 0.439 | 0.63 | 0.55931  | MS.Trt_vs_MS.NoTrt_F |
| THAP7     | 3.55E-05 | -0.6809 | 0.112 | 0.26 | 0.566992 | MS.Trt_vs_MS.NoTrt_F |
| HNRNPL    | 3.57E-05 | 0.50651 | 0.809 | 0.75 | 0.569774 | MS.Trt_vs_MS.NoTrt_F |
| ZDHC3     | 3.60E-05 | -0.5475 | 0.435 | 0.63 | 0.575376 | MS.Trt_vs_MS.NoTrt_F |
| TUSC3     | 3.61E-05 | -0.3477 | 0.367 | 0.54 | 0.576161 | MS.Trt_vs_MS.NoTrt_F |
| HIVEP2    | 3.66E-05 | -0.6466 | 0.23  | 0.4  | 0.58535  | MS.Trt_vs_MS.NoTrt_F |
| OST4      | 3.67E-05 | 0.28355 | 0.36  | 0.66 | 0.586368 | MS.Trt_vs_MS.NoTrt_F |
| CP        | 3.82E-05 | 1.16025 | 0.122 | 0.27 | 0.610095 | MS.Trt_vs_MS.NoTrt_F |
| DDX50     | 3.87E-05 | -0.2948 | 0.183 | 0.37 | 0.618282 | MS.Trt_vs_MS.NoTrt_F |
| PAN3      | 3.91E-05 | 0.26111 | 0.856 | 0.95 | 0.624506 | MS.Trt_vs_MS.NoTrt_F |
| TRMT13    | 3.91E-05 | -0.3513 | 0.129 | 0.29 | 0.624928 | MS.Trt_vs_MS.NoTrt_F |
| HLA-A     | 4.01E-05 | -0.367  | 0.748 | 0.92 | 0.639955 | MS.Trt_vs_MS.NoTrt_F |
| ARRDC2    | 4.03E-05 | -0.3576 | 0.126 | 0.28 | 0.643673 | MS.Trt_vs_MS.NoTrt_F |
| RB1       | 4.03E-05 | -0.8223 | 0.129 | 0.29 | 0.644079 | MS.Trt_vs_MS.NoTrt_F |
| C1orf123  | 4.07E-05 | -0.7373 | 0.137 | 0.29 | 0.650355 | MS.Trt_vs_MS.NoTrt_F |
| ATF6      | 4.10E-05 | -0.4372 | 0.201 | 0.38 | 0.654154 | MS.Trt_vs_MS.NoTrt_F |
| INF2      | 4.12E-05 | -0.3306 | 0.198 | 0.38 | 0.658567 | MS.Trt_vs_MS.NoTrt_F |
| REXO4     | 4.14E-05 | -1.2415 | 0.068 | 0.19 | 0.661992 | MS.Trt_vs_MS.NoTrt_F |
| ZFP36L1   | 4.15E-05 | 0.99988 | 0.759 | 0.76 | 0.662708 | MS.Trt_vs_MS.NoTrt_F |
| ATP6V0E2  | 4.15E-05 | -0.4941 | 0.187 | 0.37 | 0.662854 | MS.Trt_vs_MS.NoTrt_F |
| SETD1B    | 4.15E-05 | -0.4712 | 0.126 | 0.28 | 0.663252 | MS.Trt_vs_MS.NoTrt_F |
| CLIP4     | 4.17E-05 | -1.4915 | 0.09  | 0.23 | 0.665403 | MS.Trt_vs_MS.NoTrt_F |
| SLC16A6   | 4.17E-05 | 0.33995 | 0.23  | 0.41 | 0.666723 | MS.Trt_vs_MS.NoTrt_F |
| RTFDC1    | 4.18E-05 | -0.4222 | 0.183 | 0.36 | 0.667985 | MS.Trt_vs_MS.NoTrt_F |
| SF3B5     | 4.19E-05 | -0.7851 | 0.097 | 0.24 | 0.668605 | MS.Trt_vs_MS.NoTrt_F |
| SUMO2     | 4.21E-05 | -0.397  | 0.831 | 0.9  | 0.672878 | MS.Trt_vs_MS.NoTrt_F |
| CSGALNACT | 4.25E-05 | -0.3338 | 0.511 | 0.69 | 0.679136 | MS.Trt_vs_MS.NoTrt_F |
| MAP2K3    | 4.30E-05 | -0.8514 | 0.144 | 0.3  | 0.687112 | MS.Trt_vs_MS.NoTrt_F |
| PUM3      | 4.31E-05 | -0.8221 | 0.129 | 0.29 | 0.689024 | MS.Trt_vs_MS.NoTrt_F |

|          |          |         |       |      |          |                      |
|----------|----------|---------|-------|------|----------|----------------------|
| KIAA1147 | 4.32E-05 | -0.9551 | 0.072 | 0.2  | 0.689479 | MS.Trt_vs_MS.NoTrt_F |
| TRMT2B   | 4.37E-05 | -0.5874 | 0.594 | 0.81 | 0.698009 | MS.Trt_vs_MS.NoTrt_F |
| HSPH1    | 4.38E-05 | -0.3899 | 0.209 | 0.4  | 0.700096 | MS.Trt_vs_MS.NoTrt_F |
| MNAT1    | 4.42E-05 | -0.9016 | 0.09  | 0.23 | 0.706545 | MS.Trt_vs_MS.NoTrt_F |
| RYBP     | 4.45E-05 | -1.0403 | 0.068 | 0.19 | 0.711349 | MS.Trt_vs_MS.NoTrt_F |
| FBXO34   | 4.46E-05 | -0.3991 | 0.108 | 0.25 | 0.71275  | MS.Trt_vs_MS.NoTrt_F |
| ARL13B   | 4.48E-05 | -0.5775 | 0.158 | 0.32 | 0.715322 | MS.Trt_vs_MS.NoTrt_F |
| MTCH2    | 4.50E-05 | -0.6525 | 0.094 | 0.23 | 0.718388 | MS.Trt_vs_MS.NoTrt_F |
| CNOT6    | 4.53E-05 | -0.756  | 0.094 | 0.23 | 0.723598 | MS.Trt_vs_MS.NoTrt_F |
| TRIP12   | 4.58E-05 | -0.4562 | 0.439 | 0.6  | 0.731328 | MS.Trt_vs_MS.NoTrt_F |
| UCKL1    | 4.60E-05 | -0.632  | 0.122 | 0.28 | 0.734812 | MS.Trt_vs_MS.NoTrt_F |
| FAM192A  | 4.65E-05 | 0.59268 | 0.403 | 0.63 | 0.742885 | MS.Trt_vs_MS.NoTrt_F |
| MRPS35   | 4.71E-05 | -0.4385 | 0.112 | 0.27 | 0.752127 | MS.Trt_vs_MS.NoTrt_F |
| JAK2     | 4.74E-05 | -0.8099 | 0.165 | 0.33 | 0.756367 | MS.Trt_vs_MS.NoTrt_F |
| DICER1   | 4.74E-05 | -0.3917 | 0.119 | 0.28 | 0.756567 | MS.Trt_vs_MS.NoTrt_F |
| EFR3A    | 4.75E-05 | -0.2812 | 0.14  | 0.31 | 0.759176 | MS.Trt_vs_MS.NoTrt_F |
| MRPL47   | 4.79E-05 | -0.4109 | 0.079 | 0.21 | 0.765223 | MS.Trt_vs_MS.NoTrt_F |
| KPNA2    | 4.79E-05 | -0.5038 | 0.101 | 0.24 | 0.765543 | MS.Trt_vs_MS.NoTrt_F |
| ROMO1    | 4.82E-05 | 0.47105 | 0.162 | 0.34 | 0.769717 | MS.Trt_vs_MS.NoTrt_F |
| PDGFA    | 4.84E-05 | -0.5324 | 0.565 | 0.68 | 0.772341 | MS.Trt_vs_MS.NoTrt_F |
| PRPF6    | 4.87E-05 | -0.2995 | 0.205 | 0.38 | 0.77755  | MS.Trt_vs_MS.NoTrt_F |
| ZMYM3    | 4.87E-05 | -0.8183 | 0.335 | 0.51 | 0.777683 | MS.Trt_vs_MS.NoTrt_F |
| RBBP6    | 4.90E-05 | -0.4487 | 0.151 | 0.32 | 0.781994 | MS.Trt_vs_MS.NoTrt_F |
| PRPF31   | 4.96E-05 | -0.2534 | 0.155 | 0.33 | 0.791657 | MS.Trt_vs_MS.NoTrt_F |
| TRPV2    | 5.11E-05 | -0.5664 | 0.252 | 0.43 | 0.816122 | MS.Trt_vs_MS.NoTrt_F |
| ZDHHC13  | 5.14E-05 | 0.66805 | 0.662 | 0.86 | 0.820752 | MS.Trt_vs_MS.NoTrt_F |
| SLC38A1  | 5.15E-05 | -0.2651 | 0.73  | 0.87 | 0.823392 | MS.Trt_vs_MS.NoTrt_F |
| TBC1D5   | 5.16E-05 | -0.558  | 0.536 | 0.7  | 0.824143 | MS.Trt_vs_MS.NoTrt_F |
| RSRP1    | 5.19E-05 | -0.3998 | 0.91  | 0.97 | 0.829501 | MS.Trt_vs_MS.NoTrt_F |
| PPP1R11  | 5.26E-05 | -0.299  | 0.165 | 0.34 | 0.840137 | MS.Trt_vs_MS.NoTrt_F |
| MTFP1    | 5.28E-05 | -0.646  | 0.14  | 0.3  | 0.843973 | MS.Trt_vs_MS.NoTrt_F |
| DENND4B  | 5.30E-05 | -0.7485 | 0.173 | 0.34 | 0.846568 | MS.Trt_vs_MS.NoTrt_F |
| SLC2A4RG | 5.39E-05 | -0.597  | 0.079 | 0.21 | 0.860858 | MS.Trt_vs_MS.NoTrt_F |
| NUCB1    | 5.41E-05 | -0.2559 | 0.273 | 0.47 | 0.863671 | MS.Trt_vs_MS.NoTrt_F |
| RPL14    | 5.43E-05 | -0.2898 | 0.968 | 0.99 | 0.867658 | MS.Trt_vs_MS.NoTrt_F |
| KAT6A    | 5.44E-05 | -0.4856 | 0.709 | 0.85 | 0.868232 | MS.Trt_vs_MS.NoTrt_F |
| FKBP8    | 5.46E-05 | -0.8539 | 0.201 | 0.38 | 0.872607 | MS.Trt_vs_MS.NoTrt_F |
| CCDC141  | 5.53E-05 | -0.4481 | 0.647 | 0.79 | 0.883353 | MS.Trt_vs_MS.NoTrt_F |
| CDC5L    | 5.59E-05 | -0.3264 | 0.536 | 0.74 | 0.892383 | MS.Trt_vs_MS.NoTrt_F |
| PELI1    | 5.59E-05 | -0.3855 | 0.169 | 0.34 | 0.893515 | MS.Trt_vs_MS.NoTrt_F |



|          |          |         |       |      |          |                      |
|----------|----------|---------|-------|------|----------|----------------------|
| LSS      | 5.62E-05 | -1.0429 | 0.119 | 0.27 | 0.897169 | MS.Trt_vs_MS.NoTrt_F |
| TTC9C    | 5.70E-05 | -0.293  | 0.313 | 0.49 | 0.909726 | MS.Trt_vs_MS.NoTrt_F |
| FBXL3    | 5.79E-05 | -0.9076 | 0.129 | 0.28 | 0.92457  | MS.Trt_vs_MS.NoTrt_F |
| METTL26  | 5.79E-05 | 0.33863 | 0.176 | 0.36 | 0.924924 | MS.Trt_vs_MS.NoTrt_F |
| BTN3A1   | 5.82E-05 | -0.2703 | 0.64  | 0.74 | 0.929046 | MS.Trt_vs_MS.NoTrt_F |
| C1D      | 5.82E-05 | 0.25623 | 0.162 | 0.34 | 0.930182 | MS.Trt_vs_MS.NoTrt_F |
| ZYX      | 5.99E-05 | -0.3361 | 0.291 | 0.49 | 0.95636  | MS.Trt_vs_MS.NoTrt_F |
| XPO4     | 5.99E-05 | -0.3263 | 0.112 | 0.26 | 0.956381 | MS.Trt_vs_MS.NoTrt_F |
| NOB1     | 6.07E-05 | -0.5119 | 0.115 | 0.27 | 0.970097 | MS.Trt_vs_MS.NoTrt_F |
| FAM160B2 | 6.09E-05 | -0.4526 | 0.662 | 0.83 | 0.973311 | MS.Trt_vs_MS.NoTrt_F |
| IL24     | 6.21E-05 | -0.9527 | 0.108 | 0.25 | 0.992656 | MS.Trt_vs_MS.NoTrt_F |
| ENTPD4   | 6.24E-05 | -0.4699 | 0.529 | 0.72 | 0.996639 | MS.Trt_vs_MS.NoTrt_F |
| RNF5     | 6.24E-05 | -0.3816 | 0.122 | 0.28 | 0.996656 | MS.Trt_vs_MS.NoTrt_F |
| ASCC3    | 6.26E-05 | 0.25402 | 0.216 | 0.41 | 0.999487 | MS.Trt_vs_MS.NoTrt_F |
| PRPS1    | 6.27E-05 | -0.7382 | 0.119 | 0.27 | 1        | MS.Trt_vs_MS.NoTrt_F |
| WBP2     | 6.31E-05 | -0.4215 | 0.601 | 0.77 | 1        | MS.Trt_vs_MS.NoTrt_F |
| DMTF1    | 6.35E-05 | -0.543  | 0.504 | 0.67 | 1        | MS.Trt_vs_MS.NoTrt_F |
| TNIP2    | 6.51E-05 | -0.4371 | 0.108 | 0.25 | 1        | MS.Trt_vs_MS.NoTrt_F |
| AIDA     | 6.51E-05 | -1.2725 | 0.104 | 0.24 | 1        | MS.Trt_vs_MS.NoTrt_F |
| SH2B1    | 6.55E-05 | -0.2717 | 0.511 | 0.72 | 1        | MS.Trt_vs_MS.NoTrt_F |
| ATXN2L   | 6.56E-05 | -0.4578 | 0.205 | 0.38 | 1        | MS.Trt_vs_MS.NoTrt_F |
| ELK3     | 6.63E-05 | -0.7933 | 0.396 | 0.58 | 1        | MS.Trt_vs_MS.NoTrt_F |
| CXXC5    | 6.65E-05 | 0.60059 | 0.446 | 0.64 | 1        | MS.Trt_vs_MS.NoTrt_F |
| PPP1CB   | 6.67E-05 | 1.2403  | 0.849 | 0.84 | 1        | MS.Trt_vs_MS.NoTrt_F |
| KDM5D    | 6.67E-05 | -2.9248 | 0.273 | 0.43 | 1        | MS.Trt_vs_MS.NoTrt_F |
| TXNRD1   | 6.70E-05 | -1.3035 | 0.23  | 0.39 | 1        | MS.Trt_vs_MS.NoTrt_F |
| PMAIP1   | 6.79E-05 | -0.5268 | 0.183 | 0.36 | 1        | MS.Trt_vs_MS.NoTrt_F |
| UTP14A   | 6.82E-05 | -0.2511 | 0.158 | 0.32 | 1        | MS.Trt_vs_MS.NoTrt_F |
| NR3C2    | 6.90E-05 | -1.2241 | 0.058 | 0.17 | 1        | MS.Trt_vs_MS.NoTrt_F |
| IGSF8    | 6.96E-05 | -0.3034 | 0.122 | 0.28 | 1        | MS.Trt_vs_MS.NoTrt_F |
| PNPLA2   | 6.97E-05 | -0.4456 | 0.151 | 0.32 | 1        | MS.Trt_vs_MS.NoTrt_F |
| MRPL23   | 7.02E-05 | -0.3522 | 0.108 | 0.25 | 1        | MS.Trt_vs_MS.NoTrt_F |
| PQLC3    | 7.06E-05 | -1.0563 | 0.133 | 0.28 | 1        | MS.Trt_vs_MS.NoTrt_F |
| PDE9A    | 7.25E-05 | -0.6903 | 0.054 | 0.17 | 1        | MS.Trt_vs_MS.NoTrt_F |
| MARK3    | 7.26E-05 | -0.4642 | 0.82  | 0.95 | 1        | MS.Trt_vs_MS.NoTrt_F |
| GABRA6   | 7.31E-05 | -0.2502 | 0.104 | 0.24 | 1        | MS.Trt_vs_MS.NoTrt_F |
| CRIP1    | 7.37E-05 | -0.349  | 0.216 | 0.39 | 1        | MS.Trt_vs_MS.NoTrt_F |
| RAB35    | 7.38E-05 | -1.0516 | 0.151 | 0.3  | 1        | MS.Trt_vs_MS.NoTrt_F |
| FBXW7    | 7.38E-05 | 0.56184 | 0.165 | 0.34 | 1        | MS.Trt_vs_MS.NoTrt_F |
| CLMP     | 7.44E-05 | -0.9771 | 0.356 | 0.53 | 1        | MS.Trt_vs_MS.NoTrt_F |

|             |          |         |       |      |   |                      |
|-------------|----------|---------|-------|------|---|----------------------|
| CNDP2       | 7.45E-05 | -0.5777 | 0.669 | 0.8  | 1 | MS.Trt_vs_MS.NoTrt_F |
| ZFAND2B     | 7.51E-05 | -1.054  | 0.198 | 0.35 | 1 | MS.Trt_vs_MS.NoTrt_F |
| GPR63       | 7.51E-05 | -0.3962 | 0.27  | 0.47 | 1 | MS.Trt_vs_MS.NoTrt_F |
| TRIB1       | 7.54E-05 | -1.934  | 0.068 | 0.19 | 1 | MS.Trt_vs_MS.NoTrt_F |
| SRSF1       | 7.59E-05 | -0.2812 | 0.482 | 0.66 | 1 | MS.Trt_vs_MS.NoTrt_F |
| CPQ         | 7.64E-05 | -0.7747 | 0.313 | 0.5  | 1 | MS.Trt_vs_MS.NoTrt_F |
| NUDT2       | 7.65E-05 | -1.5324 | 0.061 | 0.18 | 1 | MS.Trt_vs_MS.NoTrt_F |
| CXorf40A    | 7.69E-05 | -0.4493 | 0.122 | 0.27 | 1 | MS.Trt_vs_MS.NoTrt_F |
| TP53I13     | 7.85E-05 | -0.2797 | 0.108 | 0.25 | 1 | MS.Trt_vs_MS.NoTrt_F |
| BMT2        | 7.90E-05 | -0.6753 | 0.086 | 0.22 | 1 | MS.Trt_vs_MS.NoTrt_F |
| ATP1A1      | 7.92E-05 | -0.2501 | 0.651 | 0.81 | 1 | MS.Trt_vs_MS.NoTrt_F |
| SLITRK2     | 8.00E-05 | -0.2705 | 0.23  | 0.39 | 1 | MS.Trt_vs_MS.NoTrt_F |
| GEMIN4      | 8.15E-05 | -0.6923 | 0.072 | 0.19 | 1 | MS.Trt_vs_MS.NoTrt_F |
| DDX3Y       | 8.17E-05 | -2.0643 | 0.04  | 0.14 | 1 | MS.Trt_vs_MS.NoTrt_F |
| UBR7        | 8.28E-05 | -0.4676 | 0.112 | 0.25 | 1 | MS.Trt_vs_MS.NoTrt_F |
| RBM22       | 8.29E-05 | -0.3215 | 0.137 | 0.3  | 1 | MS.Trt_vs_MS.NoTrt_F |
| MRPL1       | 8.41E-05 | -0.3542 | 0.129 | 0.28 | 1 | MS.Trt_vs_MS.NoTrt_F |
| DBI         | 8.45E-05 | -0.2654 | 0.194 | 0.37 | 1 | MS.Trt_vs_MS.NoTrt_F |
| RRAGA       | 8.49E-05 | -0.3848 | 0.137 | 0.29 | 1 | MS.Trt_vs_MS.NoTrt_F |
| PLG         | 8.56E-05 | -0.6604 | 0.191 | 0.34 | 1 | MS.Trt_vs_MS.NoTrt_F |
| CEP85       | 8.74E-05 | -0.7251 | 0.112 | 0.25 | 1 | MS.Trt_vs_MS.NoTrt_F |
| ATRIP       | 8.85E-05 | -0.511  | 0.104 | 0.24 | 1 | MS.Trt_vs_MS.NoTrt_F |
| MUS81       | 8.93E-05 | -0.2834 | 0.162 | 0.33 | 1 | MS.Trt_vs_MS.NoTrt_F |
| TNFRSF13B   | 8.98E-05 | -1.1769 | 0.036 | 0.13 | 1 | MS.Trt_vs_MS.NoTrt_F |
| PREB        | 9.02E-05 | -0.3354 | 0.14  | 0.3  | 1 | MS.Trt_vs_MS.NoTrt_F |
| UCHL5       | 9.05E-05 | 0.46785 | 0.173 | 0.34 | 1 | MS.Trt_vs_MS.NoTrt_F |
| SRP54       | 9.08E-05 | -0.4143 | 0.252 | 0.43 | 1 | MS.Trt_vs_MS.NoTrt_F |
| TLN1        | 9.08E-05 | -0.3449 | 0.572 | 0.71 | 1 | MS.Trt_vs_MS.NoTrt_F |
| C6orf47     | 9.16E-05 | -0.8976 | 0.09  | 0.22 | 1 | MS.Trt_vs_MS.NoTrt_F |
| TTC1        | 9.16E-05 | -0.584  | 0.201 | 0.37 | 1 | MS.Trt_vs_MS.NoTrt_F |
| ASF1A       | 9.22E-05 | 0.43851 | 0.169 | 0.35 | 1 | MS.Trt_vs_MS.NoTrt_F |
| REV1        | 9.31E-05 | -0.643  | 0.137 | 0.29 | 1 | MS.Trt_vs_MS.NoTrt_F |
| NOA1        | 9.37E-05 | -0.3196 | 0.112 | 0.25 | 1 | MS.Trt_vs_MS.NoTrt_F |
| CTC-479C5.1 | 9.38E-05 | -0.3874 | 0.464 | 0.63 | 1 | MS.Trt_vs_MS.NoTrt_F |
| HAAO        | 9.39E-05 | 0.53897 | 0.086 | 0.22 | 1 | MS.Trt_vs_MS.NoTrt_F |
| SLC2A6      | 9.59E-05 | -1.0133 | 0.216 | 0.38 | 1 | MS.Trt_vs_MS.NoTrt_F |
| SYNRG       | 9.69E-05 | -0.6104 | 0.928 | 0.97 | 1 | MS.Trt_vs_MS.NoTrt_F |
| RPL34       | 9.74E-05 | 0.61861 | 0.95  | 0.98 | 1 | MS.Trt_vs_MS.NoTrt_F |
| GABARAPL2   | 9.77E-05 | -0.4014 | 0.478 | 0.66 | 1 | MS.Trt_vs_MS.NoTrt_F |
| MANBA       | 9.80E-05 | -0.5038 | 0.169 | 0.32 | 1 | MS.Trt_vs_MS.NoTrt_F |

|          |          |         |       |      |   |                      |
|----------|----------|---------|-------|------|---|----------------------|
| EXOSC10  | 9.83E-05 | -0.3055 | 0.802 | 0.9  | 1 | MS.Trt_vs_MS.NoTrt_F |
| FAM78A   | 9.87E-05 | -0.8199 | 0.338 | 0.51 | 1 | MS.Trt_vs_MS.NoTrt_F |
| BEX3     | 9.93E-05 | -0.3937 | 0.115 | 0.26 | 1 | MS.Trt_vs_MS.NoTrt_F |
| KCTD7    | 9.95E-05 | -0.6468 | 0.205 | 0.37 | 1 | MS.Trt_vs_MS.NoTrt_F |
| NOL8     | 1.00E-04 | -0.2586 | 0.191 | 0.38 | 1 | MS.Trt_vs_MS.NoTrt_F |
| GABPB1   | 1.00E-04 | 0.42667 | 0.428 | 0.61 | 1 | MS.Trt_vs_MS.NoTrt_F |
| FAM193A  | 1.00E-04 | -0.3647 | 0.266 | 0.45 | 1 | MS.Trt_vs_MS.NoTrt_F |
| SASS6    | 1.01E-04 | -0.3681 | 0.065 | 0.18 | 1 | MS.Trt_vs_MS.NoTrt_F |
| KHDRBS1  | 1.01E-04 | 0.25506 | 0.144 | 0.3  | 1 | MS.Trt_vs_MS.NoTrt_F |
| SFN      | 1.01E-04 | -0.3873 | 0.205 | 0.35 | 1 | MS.Trt_vs_MS.NoTrt_F |
| NRBP1    | 1.01E-04 | -0.429  | 0.5   | 0.67 | 1 | MS.Trt_vs_MS.NoTrt_F |
| C19orf43 | 1.02E-04 | -0.2782 | 0.155 | 0.32 | 1 | MS.Trt_vs_MS.NoTrt_F |
| TMEM9B   | 1.02E-04 | 0.25396 | 0.209 | 0.39 | 1 | MS.Trt_vs_MS.NoTrt_F |
| PHYH     | 1.03E-04 | -0.3072 | 0.198 | 0.35 | 1 | MS.Trt_vs_MS.NoTrt_F |
| RAB7A    | 1.03E-04 | -0.3948 | 0.345 | 0.55 | 1 | MS.Trt_vs_MS.NoTrt_F |
| RNF121   | 1.03E-04 | -0.7082 | 0.32  | 0.51 | 1 | MS.Trt_vs_MS.NoTrt_F |
| GBP1     | 1.04E-04 | -0.3104 | 0.219 | 0.4  | 1 | MS.Trt_vs_MS.NoTrt_F |
| KIAA0196 | 1.04E-04 | -0.4472 | 0.133 | 0.28 | 1 | MS.Trt_vs_MS.NoTrt_F |
| ZNF862   | 1.05E-04 | -0.3128 | 0.137 | 0.29 | 1 | MS.Trt_vs_MS.NoTrt_F |
| TERF2IP  | 1.06E-04 | -0.3628 | 0.374 | 0.56 | 1 | MS.Trt_vs_MS.NoTrt_F |
| SAT1     | 1.06E-04 | -0.5205 | 0.54  | 0.76 | 1 | MS.Trt_vs_MS.NoTrt_F |
| DTX2     | 1.06E-04 | -0.5892 | 0.371 | 0.54 | 1 | MS.Trt_vs_MS.NoTrt_F |
| TPCN2    | 1.06E-04 | -1.6097 | 0.586 | 0.75 | 1 | MS.Trt_vs_MS.NoTrt_F |
| TPP2     | 1.06E-04 | -0.2591 | 0.439 | 0.64 | 1 | MS.Trt_vs_MS.NoTrt_F |
| NEMP1    | 1.06E-04 | -0.7701 | 0.079 | 0.2  | 1 | MS.Trt_vs_MS.NoTrt_F |
| NEK5     | 1.09E-04 | 0.44207 | 0.899 | 0.86 | 1 | MS.Trt_vs_MS.NoTrt_F |
| OAT      | 1.09E-04 | -0.7426 | 0.101 | 0.23 | 1 | MS.Trt_vs_MS.NoTrt_F |
| SPNS3    | 1.09E-04 | 0.42838 | 0.068 | 0.19 | 1 | MS.Trt_vs_MS.NoTrt_F |
| AP2M1    | 1.09E-04 | -0.4213 | 0.288 | 0.48 | 1 | MS.Trt_vs_MS.NoTrt_F |
| VPS4A    | 1.09E-04 | -0.7433 | 0.604 | 0.75 | 1 | MS.Trt_vs_MS.NoTrt_F |
| MAN1B1   | 1.10E-04 | -0.9378 | 0.284 | 0.48 | 1 | MS.Trt_vs_MS.NoTrt_F |
| COPS3    | 1.11E-04 | -0.6085 | 0.237 | 0.41 | 1 | MS.Trt_vs_MS.NoTrt_F |
| PRPF40A  | 1.11E-04 | -0.3533 | 0.457 | 0.63 | 1 | MS.Trt_vs_MS.NoTrt_F |
| INIP     | 1.11E-04 | -0.2753 | 0.601 | 0.81 | 1 | MS.Trt_vs_MS.NoTrt_F |
| ACIN1    | 1.12E-04 | -0.5745 | 0.46  | 0.63 | 1 | MS.Trt_vs_MS.NoTrt_F |
| MXD4     | 1.13E-04 | 0.35095 | 0.14  | 0.3  | 1 | MS.Trt_vs_MS.NoTrt_F |
| TTPA     | 1.15E-04 | -0.3756 | 0.356 | 0.54 | 1 | MS.Trt_vs_MS.NoTrt_F |
| GGA2     | 1.15E-04 | -0.4517 | 0.629 | 0.8  | 1 | MS.Trt_vs_MS.NoTrt_F |
| SIK2     | 1.16E-04 | -0.5142 | 0.691 | 0.82 | 1 | MS.Trt_vs_MS.NoTrt_F |
| TAP2     | 1.16E-04 | -0.5461 | 0.183 | 0.34 | 1 | MS.Trt_vs_MS.NoTrt_F |

|           |          |         |       |      |   |                      |
|-----------|----------|---------|-------|------|---|----------------------|
| FUCA2     | 1.16E-04 | 0.27471 | 0.288 | 0.48 | 1 | MS.Trt_vs_MS.NoTrt_F |
| RBM14-RBM | 1.16E-04 | -1.098  | 0.112 | 0.25 | 1 | MS.Trt_vs_MS.NoTrt_F |
| ZAP70     | 1.17E-04 | -0.3167 | 0.442 | 0.66 | 1 | MS.Trt_vs_MS.NoTrt_F |
| DIP2A     | 1.18E-04 | -0.5669 | 0.813 | 0.87 | 1 | MS.Trt_vs_MS.NoTrt_F |
| DIP2B     | 1.18E-04 | 0.37994 | 0.309 | 0.51 | 1 | MS.Trt_vs_MS.NoTrt_F |
| MRPL18    | 1.19E-04 | 0.50547 | 0.158 | 0.33 | 1 | MS.Trt_vs_MS.NoTrt_F |
| EEFSEC    | 1.19E-04 | -1.8484 | 0.09  | 0.22 | 1 | MS.Trt_vs_MS.NoTrt_F |
| RGPD6     | 1.19E-04 | -0.4014 | 0.522 | 0.69 | 1 | MS.Trt_vs_MS.NoTrt_F |
| CNOT2     | 1.19E-04 | -0.3875 | 0.921 | 0.96 | 1 | MS.Trt_vs_MS.NoTrt_F |
| EHD1      | 1.19E-04 | -0.2992 | 0.291 | 0.49 | 1 | MS.Trt_vs_MS.NoTrt_F |
| WDR53     | 1.19E-04 | -0.6081 | 0.083 | 0.21 | 1 | MS.Trt_vs_MS.NoTrt_F |
| UTP18     | 1.20E-04 | -0.6772 | 0.126 | 0.27 | 1 | MS.Trt_vs_MS.NoTrt_F |
| SERINC4   | 1.21E-04 | -1.2327 | 0.054 | 0.16 | 1 | MS.Trt_vs_MS.NoTrt_F |
| TPCN1     | 1.22E-04 | -0.6744 | 0.335 | 0.51 | 1 | MS.Trt_vs_MS.NoTrt_F |
| ERAP2     | 1.22E-04 | -0.7304 | 0.619 | 0.77 | 1 | MS.Trt_vs_MS.NoTrt_F |
| PES1      | 1.22E-04 | -1.1841 | 0.108 | 0.24 | 1 | MS.Trt_vs_MS.NoTrt_F |
| UBE2E1    | 1.23E-04 | -1.3996 | 0.083 | 0.2  | 1 | MS.Trt_vs_MS.NoTrt_F |
| TRAPPC2L  | 1.23E-04 | -0.3408 | 0.129 | 0.28 | 1 | MS.Trt_vs_MS.NoTrt_F |
| STRA13    | 1.23E-04 | 0.27851 | 0.126 | 0.28 | 1 | MS.Trt_vs_MS.NoTrt_F |
| PPP2R5D   | 1.24E-04 | -0.2532 | 0.155 | 0.32 | 1 | MS.Trt_vs_MS.NoTrt_F |
| CRYZ      | 1.27E-04 | -0.8424 | 0.101 | 0.23 | 1 | MS.Trt_vs_MS.NoTrt_F |
| TMEM62    | 1.27E-04 | -0.6598 | 0.223 | 0.39 | 1 | MS.Trt_vs_MS.NoTrt_F |
| TMBIM1    | 1.27E-04 | -0.2892 | 0.529 | 0.76 | 1 | MS.Trt_vs_MS.NoTrt_F |
| CDC37L1   | 1.28E-04 | -1.0099 | 0.101 | 0.23 | 1 | MS.Trt_vs_MS.NoTrt_F |
| DEDD2     | 1.28E-04 | -0.2674 | 0.349 | 0.53 | 1 | MS.Trt_vs_MS.NoTrt_F |
| PTTG1     | 1.28E-04 | 0.36216 | 0.126 | 0.28 | 1 | MS.Trt_vs_MS.NoTrt_F |
| RAB14     | 1.29E-04 | -0.4468 | 0.209 | 0.38 | 1 | MS.Trt_vs_MS.NoTrt_F |
| AP5S1     | 1.29E-04 | 0.94212 | 0.906 | 0.8  | 1 | MS.Trt_vs_MS.NoTrt_F |
| CAPN7     | 1.30E-04 | -0.823  | 0.46  | 0.63 | 1 | MS.Trt_vs_MS.NoTrt_F |
| CTRL      | 1.31E-04 | -0.8196 | 0.097 | 0.23 | 1 | MS.Trt_vs_MS.NoTrt_F |
| PDCD6IP   | 1.32E-04 | -0.2704 | 0.284 | 0.46 | 1 | MS.Trt_vs_MS.NoTrt_F |
| CCDC47    | 1.33E-04 | -0.3486 | 0.608 | 0.79 | 1 | MS.Trt_vs_MS.NoTrt_F |
| ZNF32     | 1.33E-04 | -1.2595 | 0.068 | 0.18 | 1 | MS.Trt_vs_MS.NoTrt_F |
| ZNF79     | 1.33E-04 | -1.298  | 0.061 | 0.17 | 1 | MS.Trt_vs_MS.NoTrt_F |
| TBCA      | 1.36E-04 | -0.3166 | 0.248 | 0.41 | 1 | MS.Trt_vs_MS.NoTrt_F |
| ERVK3-1   | 1.37E-04 | -0.5774 | 0.295 | 0.47 | 1 | MS.Trt_vs_MS.NoTrt_F |
| CMTR1     | 1.38E-04 | -1.1049 | 0.155 | 0.3  | 1 | MS.Trt_vs_MS.NoTrt_F |
| ZNF407    | 1.39E-04 | -0.8502 | 0.097 | 0.23 | 1 | MS.Trt_vs_MS.NoTrt_F |
| SNRPE     | 1.39E-04 | 0.82893 | 0.129 | 0.28 | 1 | MS.Trt_vs_MS.NoTrt_F |
| SH3BP1    | 1.39E-04 | -0.9387 | 0.097 | 0.23 | 1 | MS.Trt_vs_MS.NoTrt_F |

|          |          |         |       |      |   |                      |
|----------|----------|---------|-------|------|---|----------------------|
| MAL      | 1.40E-04 | -0.341  | 0.176 | 0.34 | 1 | MS.Trt_vs_MS.NoTrt_F |
| NT5C3A   | 1.40E-04 | 0.37577 | 0.212 | 0.4  | 1 | MS.Trt_vs_MS.NoTrt_F |
| KBTBD4   | 1.40E-04 | -0.5745 | 0.076 | 0.19 | 1 | MS.Trt_vs_MS.NoTrt_F |
| ARGLU1   | 1.41E-04 | -0.2954 | 0.655 | 0.84 | 1 | MS.Trt_vs_MS.NoTrt_F |
| TREX1    | 1.42E-04 | -0.6496 | 0.104 | 0.24 | 1 | MS.Trt_vs_MS.NoTrt_F |
| HADHB    | 1.43E-04 | -0.3307 | 0.471 | 0.62 | 1 | MS.Trt_vs_MS.NoTrt_F |
| MIF4GD   | 1.43E-04 | -0.3562 | 0.129 | 0.28 | 1 | MS.Trt_vs_MS.NoTrt_F |
| ABHD4    | 1.44E-04 | -0.9121 | 0.054 | 0.16 | 1 | MS.Trt_vs_MS.NoTrt_F |
| CCDC171  | 1.44E-04 | -0.3734 | 0.414 | 0.6  | 1 | MS.Trt_vs_MS.NoTrt_F |
| ITPR2    | 1.45E-04 | -0.6461 | 0.205 | 0.37 | 1 | MS.Trt_vs_MS.NoTrt_F |
| VAC14    | 1.45E-04 | -0.7744 | 0.094 | 0.22 | 1 | MS.Trt_vs_MS.NoTrt_F |
| BAG4     | 1.45E-04 | 0.78229 | 0.169 | 0.33 | 1 | MS.Trt_vs_MS.NoTrt_F |
| UFM1     | 1.46E-04 | -0.3483 | 0.392 | 0.55 | 1 | MS.Trt_vs_MS.NoTrt_F |
| POLA1    | 1.46E-04 | -1.3122 | 0.083 | 0.2  | 1 | MS.Trt_vs_MS.NoTrt_F |
| CD84     | 1.46E-04 | -0.4855 | 0.716 | 0.8  | 1 | MS.Trt_vs_MS.NoTrt_F |
| LCMT2    | 1.46E-04 | -0.8036 | 0.673 | 0.77 | 1 | MS.Trt_vs_MS.NoTrt_F |
| TUBGCP2  | 1.46E-04 | -0.4661 | 0.716 | 0.83 | 1 | MS.Trt_vs_MS.NoTrt_F |
| CD5      | 1.46E-04 | -0.2501 | 0.446 | 0.66 | 1 | MS.Trt_vs_MS.NoTrt_F |
| PRMT9    | 1.47E-04 | 0.96838 | 0.198 | 0.38 | 1 | MS.Trt_vs_MS.NoTrt_F |
| PKIA     | 1.49E-04 | -0.2854 | 0.112 | 0.25 | 1 | MS.Trt_vs_MS.NoTrt_F |
| DRG2     | 1.49E-04 | -0.6774 | 0.176 | 0.34 | 1 | MS.Trt_vs_MS.NoTrt_F |
| C21orf2  | 1.49E-04 | -0.266  | 0.126 | 0.27 | 1 | MS.Trt_vs_MS.NoTrt_F |
| EDEM2    | 1.49E-04 | -0.3079 | 0.126 | 0.27 | 1 | MS.Trt_vs_MS.NoTrt_F |
| R3HCC1L  | 1.52E-04 | -0.3574 | 0.281 | 0.45 | 1 | MS.Trt_vs_MS.NoTrt_F |
| RNF38    | 1.52E-04 | -0.2768 | 0.194 | 0.36 | 1 | MS.Trt_vs_MS.NoTrt_F |
| BRAP     | 1.54E-04 | -0.3826 | 0.291 | 0.47 | 1 | MS.Trt_vs_MS.NoTrt_F |
| GNB2     | 1.54E-04 | -0.5766 | 0.496 | 0.65 | 1 | MS.Trt_vs_MS.NoTrt_F |
| MED8     | 1.56E-04 | -0.9666 | 0.094 | 0.22 | 1 | MS.Trt_vs_MS.NoTrt_F |
| AHNAK    | 1.58E-04 | -0.281  | 0.759 | 0.9  | 1 | MS.Trt_vs_MS.NoTrt_F |
| C6orf106 | 1.59E-04 | -0.9868 | 0.119 | 0.25 | 1 | MS.Trt_vs_MS.NoTrt_F |
| NOTCH2NL | 1.59E-04 | -0.3695 | 0.151 | 0.3  | 1 | MS.Trt_vs_MS.NoTrt_F |
| INO80E   | 1.59E-04 | -1.0448 | 0.158 | 0.3  | 1 | MS.Trt_vs_MS.NoTrt_F |
| ERP29    | 1.60E-04 | -0.3031 | 0.806 | 0.91 | 1 | MS.Trt_vs_MS.NoTrt_F |
| TRIM2    | 1.63E-04 | -0.472  | 0.187 | 0.34 | 1 | MS.Trt_vs_MS.NoTrt_F |
| VAMP1    | 1.64E-04 | -0.4686 | 0.126 | 0.27 | 1 | MS.Trt_vs_MS.NoTrt_F |
| PAK2     | 1.65E-04 | -0.3365 | 0.68  | 0.86 | 1 | MS.Trt_vs_MS.NoTrt_F |
| MECP2    | 1.65E-04 | -0.3269 | 0.917 | 0.97 | 1 | MS.Trt_vs_MS.NoTrt_F |
| RUFY1    | 1.67E-04 | -0.8171 | 0.252 | 0.41 | 1 | MS.Trt_vs_MS.NoTrt_F |
| AGAP5    | 1.67E-04 | -1.173  | 0.076 | 0.19 | 1 | MS.Trt_vs_MS.NoTrt_F |
| NDUFB4   | 1.68E-04 | 0.50332 | 0.237 | 0.44 | 1 | MS.Trt_vs_MS.NoTrt_F |

|           |          |         |       |      |   |                      |
|-----------|----------|---------|-------|------|---|----------------------|
| DNAJB9    | 1.68E-04 | -0.5351 | 0.119 | 0.26 | 1 | MS.Trt_vs_MS.NoTrt_F |
| TBC1D2    | 1.68E-04 | -1.2694 | 0.065 | 0.18 | 1 | MS.Trt_vs_MS.NoTrt_F |
| C7orf26   | 1.68E-04 | -0.5739 | 0.086 | 0.21 | 1 | MS.Trt_vs_MS.NoTrt_F |
| ARL6IP1   | 1.69E-04 | -0.299  | 0.482 | 0.66 | 1 | MS.Trt_vs_MS.NoTrt_F |
| RBM14     | 1.69E-04 | -0.2624 | 0.162 | 0.32 | 1 | MS.Trt_vs_MS.NoTrt_F |
| VIM       | 1.69E-04 | -0.3282 | 0.766 | 0.9  | 1 | MS.Trt_vs_MS.NoTrt_F |
| TAF15     | 1.69E-04 | -0.3244 | 0.18  | 0.34 | 1 | MS.Trt_vs_MS.NoTrt_F |
| FAM156B   | 1.71E-04 | 0.51903 | 0.076 | 0.19 | 1 | MS.Trt_vs_MS.NoTrt_F |
| RELL2     | 1.71E-04 | -0.4291 | 0.112 | 0.25 | 1 | MS.Trt_vs_MS.NoTrt_F |
| THAP1     | 1.72E-04 | 0.79864 | 0.101 | 0.23 | 1 | MS.Trt_vs_MS.NoTrt_F |
| UBE2Q2    | 1.72E-04 | -0.6086 | 0.119 | 0.26 | 1 | MS.Trt_vs_MS.NoTrt_F |
| NPC2      | 1.73E-04 | 0.4517  | 0.101 | 0.24 | 1 | MS.Trt_vs_MS.NoTrt_F |
| IGSF9     | 1.73E-04 | -0.6316 | 0.259 | 0.41 | 1 | MS.Trt_vs_MS.NoTrt_F |
| PEPD      | 1.74E-04 | -0.3343 | 0.144 | 0.3  | 1 | MS.Trt_vs_MS.NoTrt_F |
| THG1L     | 1.77E-04 | 0.27313 | 0.54  | 0.71 | 1 | MS.Trt_vs_MS.NoTrt_F |
| ZNF831    | 1.79E-04 | -0.3007 | 0.223 | 0.4  | 1 | MS.Trt_vs_MS.NoTrt_F |
| MPHOSPH10 | 1.80E-04 | -0.4535 | 0.216 | 0.38 | 1 | MS.Trt_vs_MS.NoTrt_F |
| CD93      | 1.82E-04 | 0.66113 | 0.176 | 0.33 | 1 | MS.Trt_vs_MS.NoTrt_F |
| CCDC28A   | 1.82E-04 | -0.4828 | 0.155 | 0.31 | 1 | MS.Trt_vs_MS.NoTrt_F |
| ABCA7     | 1.83E-04 | 0.28198 | 0.194 | 0.37 | 1 | MS.Trt_vs_MS.NoTrt_F |
| TSC22D3   | 1.84E-04 | -0.2743 | 0.683 | 0.89 | 1 | MS.Trt_vs_MS.NoTrt_F |
| HMGXB4    | 0.00018  | -0.808  | 0.115 | 0.25 | 1 | MS.Trt_vs_MS.NoTrt_F |
| LARP4     | 1.84E-04 | -0.4053 | 0.353 | 0.51 | 1 | MS.Trt_vs_MS.NoTrt_F |
| ERP44     | 1.86E-04 | -0.4596 | 0.27  | 0.43 | 1 | MS.Trt_vs_MS.NoTrt_F |
| RAB30     | 1.87E-04 | 0.3248  | 0.263 | 0.43 | 1 | MS.Trt_vs_MS.NoTrt_F |
| PDHA1     | 1.89E-04 | -0.3356 | 0.198 | 0.37 | 1 | MS.Trt_vs_MS.NoTrt_F |
| ASNSD1    | 1.89E-04 | 0.29119 | 0.133 | 0.29 | 1 | MS.Trt_vs_MS.NoTrt_F |
| MRPL43    | 1.91E-04 | -0.3091 | 0.104 | 0.24 | 1 | MS.Trt_vs_MS.NoTrt_F |
| VPS16     | 1.93E-04 | 0.35277 | 0.133 | 0.29 | 1 | MS.Trt_vs_MS.NoTrt_F |
| VPS37A    | 1.94E-04 | -0.6945 | 0.14  | 0.28 | 1 | MS.Trt_vs_MS.NoTrt_F |
| RABGAP1L  | 1.95E-04 | -0.4128 | 0.835 | 0.9  | 1 | MS.Trt_vs_MS.NoTrt_F |
| GOLGA5    | 1.95E-04 | -1.0109 | 0.126 | 0.27 | 1 | MS.Trt_vs_MS.NoTrt_F |
| ZGPAT     | 1.95E-04 | -0.5123 | 0.112 | 0.25 | 1 | MS.Trt_vs_MS.NoTrt_F |
| ZNRD1     | 1.98E-04 | 0.36912 | 0.147 | 0.3  | 1 | MS.Trt_vs_MS.NoTrt_F |
| ACSL5     | 1.99E-04 | -0.5883 | 0.183 | 0.34 | 1 | MS.Trt_vs_MS.NoTrt_F |
| TRIP11    | 2.00E-04 | -0.4442 | 0.511 | 0.66 | 1 | MS.Trt_vs_MS.NoTrt_F |
| C16orf54  | 2.01E-04 | 1.33361 | 0.802 | 0.87 | 1 | MS.Trt_vs_MS.NoTrt_F |
| CKAP2     | 2.01E-04 | -0.4415 | 0.122 | 0.26 | 1 | MS.Trt_vs_MS.NoTrt_F |
| FH        | 2.02E-04 | -0.5228 | 0.068 | 0.18 | 1 | MS.Trt_vs_MS.NoTrt_F |
| ACTN4     | 2.02E-04 | -0.4298 | 0.414 | 0.59 | 1 | MS.Trt_vs_MS.NoTrt_F |

|           |          |         |       |      |   |                      |
|-----------|----------|---------|-------|------|---|----------------------|
| LMBRD2    | 2.02E-04 | -0.3295 | 0.09  | 0.22 | 1 | MS.Trt_vs_MS.NoTrt_F |
| DCTN4     | 2.03E-04 | -0.5844 | 0.288 | 0.48 | 1 | MS.Trt_vs_MS.NoTrt_F |
| SH2D3C    | 2.03E-04 | -0.2531 | 0.183 | 0.35 | 1 | MS.Trt_vs_MS.NoTrt_F |
| GBF1      | 2.03E-04 | -0.3919 | 0.151 | 0.3  | 1 | MS.Trt_vs_MS.NoTrt_F |
| RNF6      | 2.04E-04 | -0.7346 | 0.198 | 0.35 | 1 | MS.Trt_vs_MS.NoTrt_F |
| SLC25A44  | 2.04E-04 | 0.45875 | 0.586 | 0.77 | 1 | MS.Trt_vs_MS.NoTrt_F |
| DUSP4     | 2.05E-04 | -0.3105 | 0.277 | 0.45 | 1 | MS.Trt_vs_MS.NoTrt_F |
| TATDN1    | 2.05E-04 | -1.3556 | 0.644 | 0.76 | 1 | MS.Trt_vs_MS.NoTrt_F |
| SLC30A3   | 2.06E-04 | -0.315  | 0.356 | 0.54 | 1 | MS.Trt_vs_MS.NoTrt_F |
| LUC7L2    | 2.07E-04 | -0.3826 | 0.518 | 0.69 | 1 | MS.Trt_vs_MS.NoTrt_F |
| MTOR      | 2.08E-04 | -0.5647 | 0.14  | 0.29 | 1 | MS.Trt_vs_MS.NoTrt_F |
| ATXN7L3B  | 2.08E-04 | -0.3884 | 0.151 | 0.3  | 1 | MS.Trt_vs_MS.NoTrt_F |
| ABHD16A   | 2.10E-04 | -0.3471 | 0.14  | 0.29 | 1 | MS.Trt_vs_MS.NoTrt_F |
| LPIN2     | 2.10E-04 | 0.25589 | 0.147 | 0.3  | 1 | MS.Trt_vs_MS.NoTrt_F |
| XPC       | 2.11E-04 | -0.2949 | 0.223 | 0.39 | 1 | MS.Trt_vs_MS.NoTrt_F |
| EIF1B     | 2.11E-04 | -0.3977 | 0.147 | 0.3  | 1 | MS.Trt_vs_MS.NoTrt_F |
| DAZAP1    | 2.12E-04 | -0.338  | 0.126 | 0.27 | 1 | MS.Trt_vs_MS.NoTrt_F |
| HS1BP3    | 2.12E-04 | -0.4624 | 0.119 | 0.25 | 1 | MS.Trt_vs_MS.NoTrt_F |
| RCE1      | 2.17E-04 | -0.507  | 0.086 | 0.21 | 1 | MS.Trt_vs_MS.NoTrt_F |
| GADD45GIP | 2.19E-04 | 0.60928 | 0.155 | 0.32 | 1 | MS.Trt_vs_MS.NoTrt_F |
| ILK       | 2.19E-04 | -0.3087 | 0.187 | 0.35 | 1 | MS.Trt_vs_MS.NoTrt_F |
| ZMYND11   | 2.20E-04 | -0.3334 | 0.108 | 0.24 | 1 | MS.Trt_vs_MS.NoTrt_F |
| SLC39A4   | 2.22E-04 | -0.3768 | 0.331 | 0.5  | 1 | MS.Trt_vs_MS.NoTrt_F |
| TUT1      | 2.23E-04 | -0.7325 | 0.108 | 0.24 | 1 | MS.Trt_vs_MS.NoTrt_F |
| SHANK2    | 2.24E-04 | -0.318  | 0.281 | 0.45 | 1 | MS.Trt_vs_MS.NoTrt_F |
| SLC25A36  | 2.25E-04 | -0.5324 | 0.129 | 0.27 | 1 | MS.Trt_vs_MS.NoTrt_F |
| ATP6V1A   | 2.28E-04 | -0.3991 | 0.518 | 0.67 | 1 | MS.Trt_vs_MS.NoTrt_F |
| TLE4      | 2.29E-04 | 0.37254 | 0.14  | 0.29 | 1 | MS.Trt_vs_MS.NoTrt_F |
| TFE3      | 2.29E-04 | -0.7618 | 0.09  | 0.21 | 1 | MS.Trt_vs_MS.NoTrt_F |
| UFSP2     | 2.33E-04 | -0.6122 | 0.122 | 0.26 | 1 | MS.Trt_vs_MS.NoTrt_F |
| BAG3      | 2.34E-04 | -0.3812 | 0.072 | 0.19 | 1 | MS.Trt_vs_MS.NoTrt_F |
| SLC46A3   | 2.39E-04 | -0.3185 | 0.083 | 0.2  | 1 | MS.Trt_vs_MS.NoTrt_F |
| PPP1R10   | 2.39E-04 | -0.653  | 0.478 | 0.65 | 1 | MS.Trt_vs_MS.NoTrt_F |
| FADD      | 2.39E-04 | -0.7885 | 0.09  | 0.21 | 1 | MS.Trt_vs_MS.NoTrt_F |
| PBDC1     | 2.41E-04 | 0.26339 | 0.101 | 0.23 | 1 | MS.Trt_vs_MS.NoTrt_F |
| C11orf24  | 2.41E-04 | -1.0649 | 0.194 | 0.34 | 1 | MS.Trt_vs_MS.NoTrt_F |
| FAM104A   | 2.43E-04 | 0.40855 | 0.198 | 0.37 | 1 | MS.Trt_vs_MS.NoTrt_F |
| BTBD10    | 2.44E-04 | -0.7469 | 0.137 | 0.28 | 1 | MS.Trt_vs_MS.NoTrt_F |
| SUPT7L    | 2.46E-04 | -0.4081 | 0.403 | 0.59 | 1 | MS.Trt_vs_MS.NoTrt_F |
| ALG10     | 2.49E-04 | -1.7512 | 0.086 | 0.2  | 1 | MS.Trt_vs_MS.NoTrt_F |

|           |          |         |       |      |   |                      |
|-----------|----------|---------|-------|------|---|----------------------|
| DUT       | 2.49E-04 | -0.2519 | 0.151 | 0.3  | 1 | MS.Trt_vs_MS.NoTrt_F |
| NUP210    | 2.51E-04 | -0.4069 | 0.5   | 0.67 | 1 | MS.Trt_vs_MS.NoTrt_F |
| CYP7B1    | 2.51E-04 | 0.39627 | 0.374 | 0.54 | 1 | MS.Trt_vs_MS.NoTrt_F |
| CHST6     | 2.54E-04 | 0.31791 | 0.932 | 0.88 | 1 | MS.Trt_vs_MS.NoTrt_F |
| INSIG1    | 2.57E-04 | -0.3236 | 0.165 | 0.32 | 1 | MS.Trt_vs_MS.NoTrt_F |
| GOLGA8A   | 2.58E-04 | 0.32759 | 0.399 | 0.59 | 1 | MS.Trt_vs_MS.NoTrt_F |
| PPP1R7    | 2.58E-04 | -0.3919 | 0.162 | 0.31 | 1 | MS.Trt_vs_MS.NoTrt_F |
| VPS72     | 2.59E-04 | -0.3554 | 0.14  | 0.29 | 1 | MS.Trt_vs_MS.NoTrt_F |
| SF3B4     | 2.60E-04 | -0.9113 | 0.169 | 0.32 | 1 | MS.Trt_vs_MS.NoTrt_F |
| GNB1L     | 2.63E-04 | -0.451  | 0.183 | 0.33 | 1 | MS.Trt_vs_MS.NoTrt_F |
| TMEM261   | 2.63E-04 | 1.0811  | 0.115 | 0.25 | 1 | MS.Trt_vs_MS.NoTrt_F |
| RBM12B    | 2.66E-04 | -0.3046 | 0.133 | 0.28 | 1 | MS.Trt_vs_MS.NoTrt_F |
| LINC01420 | 2.66E-04 | 0.62093 | 0.129 | 0.28 | 1 | MS.Trt_vs_MS.NoTrt_F |
| KIAA0556  | 2.67E-04 | -1.3372 | 0.284 | 0.45 | 1 | MS.Trt_vs_MS.NoTrt_F |
| WBP1L     | 2.67E-04 | -1.0701 | 0.112 | 0.24 | 1 | MS.Trt_vs_MS.NoTrt_F |
| SLC35A2   | 2.68E-04 | -0.8826 | 0.079 | 0.19 | 1 | MS.Trt_vs_MS.NoTrt_F |
| DNAJC30   | 2.68E-04 | -0.442  | 0.234 | 0.41 | 1 | MS.Trt_vs_MS.NoTrt_F |
| TMEM79    | 2.70E-04 | -0.5215 | 0.104 | 0.23 | 1 | MS.Trt_vs_MS.NoTrt_F |
| SACM1L    | 2.70E-04 | -0.3629 | 0.241 | 0.43 | 1 | MS.Trt_vs_MS.NoTrt_F |
| THOC6     | 2.72E-04 | -0.5869 | 0.101 | 0.23 | 1 | MS.Trt_vs_MS.NoTrt_F |
| TSNAX     | 2.74E-04 | -0.3683 | 0.662 | 0.8  | 1 | MS.Trt_vs_MS.NoTrt_F |
| TBC1D1    | 2.76E-04 | -0.4634 | 0.522 | 0.74 | 1 | MS.Trt_vs_MS.NoTrt_F |
| PAFAH1B3  | 2.79E-04 | -0.5925 | 0.094 | 0.22 | 1 | MS.Trt_vs_MS.NoTrt_F |
| NREP      | 2.79E-04 | -0.6554 | 0.137 | 0.27 | 1 | MS.Trt_vs_MS.NoTrt_F |
| TAF9B     | 2.80E-04 | -0.5352 | 0.119 | 0.25 | 1 | MS.Trt_vs_MS.NoTrt_F |
| LRIG1     | 2.80E-04 | 0.36398 | 0.191 | 0.35 | 1 | MS.Trt_vs_MS.NoTrt_F |
| ESR2      | 2.80E-04 | 0.31321 | 0.493 | 0.7  | 1 | MS.Trt_vs_MS.NoTrt_F |
| LGALS8    | 2.81E-04 | -0.5963 | 0.594 | 0.75 | 1 | MS.Trt_vs_MS.NoTrt_F |
| TOPORS    | 2.84E-04 | -0.3443 | 0.104 | 0.23 | 1 | MS.Trt_vs_MS.NoTrt_F |
| TRIM28    | 2.85E-04 | -1.5944 | 0.09  | 0.21 | 1 | MS.Trt_vs_MS.NoTrt_F |
| MFSD6     | 2.90E-04 | -0.9289 | 0.147 | 0.29 | 1 | MS.Trt_vs_MS.NoTrt_F |
| SYCP1     | 2.90E-04 | -0.3708 | 0.248 | 0.43 | 1 | MS.Trt_vs_MS.NoTrt_F |
| TNPO2     | 2.92E-04 | -0.9052 | 0.151 | 0.29 | 1 | MS.Trt_vs_MS.NoTrt_F |
| SERGEF    | 2.93E-04 | -0.3262 | 0.129 | 0.27 | 1 | MS.Trt_vs_MS.NoTrt_F |
| TRIM47    | 2.94E-04 | -0.7628 | 0.061 | 0.17 | 1 | MS.Trt_vs_MS.NoTrt_F |
| DTNB      | 2.94E-04 | -0.292  | 0.165 | 0.32 | 1 | MS.Trt_vs_MS.NoTrt_F |
| GPR108    | 2.96E-04 | -0.4018 | 0.169 | 0.32 | 1 | MS.Trt_vs_MS.NoTrt_F |
| ZNF134    | 2.96E-04 | -1.5856 | 0.137 | 0.27 | 1 | MS.Trt_vs_MS.NoTrt_F |
| NOC4L     | 2.98E-04 | -0.7591 | 0.076 | 0.19 | 1 | MS.Trt_vs_MS.NoTrt_F |
| STAT3     | 2.98E-04 | -0.277  | 0.795 | 0.87 | 1 | MS.Trt_vs_MS.NoTrt_F |



|            |          |         |       |      |   |                      |
|------------|----------|---------|-------|------|---|----------------------|
| APOA2      | 2.99E-04 | -0.3131 | 0.205 | 0.35 | 1 | MS.Trt_vs_MS.NoTrt_F |
| RP11-500M8 | 2.99E-04 | 0.37853 | 0.112 | 0.25 | 1 | MS.Trt_vs_MS.NoTrt_F |
| BARD1      | 3.01E-04 | 0.41214 | 0.151 | 0.31 | 1 | MS.Trt_vs_MS.NoTrt_F |
| NDC1       | 3.02E-04 | -1.1019 | 0.065 | 0.17 | 1 | MS.Trt_vs_MS.NoTrt_F |
| TMEM208    | 3.09E-04 | 0.41598 | 0.137 | 0.29 | 1 | MS.Trt_vs_MS.NoTrt_F |
| ZC3H7A     | 3.13E-04 | 0.265   | 0.367 | 0.56 | 1 | MS.Trt_vs_MS.NoTrt_F |
| LANCL1     | 3.13E-04 | -0.2675 | 0.137 | 0.28 | 1 | MS.Trt_vs_MS.NoTrt_F |
| ANKMY2     | 3.14E-04 | -0.6401 | 0.058 | 0.16 | 1 | MS.Trt_vs_MS.NoTrt_F |
| ATF7       | 3.16E-04 | -0.3224 | 0.403 | 0.58 | 1 | MS.Trt_vs_MS.NoTrt_F |
| RNF123     | 3.16E-04 | -0.689  | 0.144 | 0.29 | 1 | MS.Trt_vs_MS.NoTrt_F |
| CRLS1      | 3.17E-04 | -0.2549 | 0.288 | 0.45 | 1 | MS.Trt_vs_MS.NoTrt_F |
| HSPE1-MOB  | 3.19E-04 | -0.4791 | 0.112 | 0.24 | 1 | MS.Trt_vs_MS.NoTrt_F |
| PPM1G      | 3.21E-04 | -0.255  | 0.665 | 0.82 | 1 | MS.Trt_vs_MS.NoTrt_F |
| SNED1      | 3.21E-04 | -0.6271 | 0.144 | 0.29 | 1 | MS.Trt_vs_MS.NoTrt_F |
| NOL7       | 3.21E-04 | 0.45676 | 0.191 | 0.36 | 1 | MS.Trt_vs_MS.NoTrt_F |
| GLYCTK     | 3.21E-04 | -0.4224 | 0.101 | 0.23 | 1 | MS.Trt_vs_MS.NoTrt_F |
| TXN        | 3.21E-04 | 0.29536 | 0.212 | 0.39 | 1 | MS.Trt_vs_MS.NoTrt_F |
| ACAT2      | 3.25E-04 | -1.4281 | 0.234 | 0.37 | 1 | MS.Trt_vs_MS.NoTrt_F |
| OGFOD2     | 3.25E-04 | -0.6314 | 0.101 | 0.23 | 1 | MS.Trt_vs_MS.NoTrt_F |
| HS3ST3A1   | 3.26E-04 | -0.2985 | 0.076 | 0.19 | 1 | MS.Trt_vs_MS.NoTrt_F |
| RGCC       | 3.26E-04 | 0.29413 | 0.317 | 0.53 | 1 | MS.Trt_vs_MS.NoTrt_F |
| PARP6      | 3.32E-04 | -0.5042 | 0.626 | 0.8  | 1 | MS.Trt_vs_MS.NoTrt_F |
| POLR2M     | 3.34E-04 | -0.4138 | 0.158 | 0.3  | 1 | MS.Trt_vs_MS.NoTrt_F |
| HNRNPA3    | 3.35E-04 | -0.3012 | 0.399 | 0.55 | 1 | MS.Trt_vs_MS.NoTrt_F |
| CARS       | 3.36E-04 | -0.3425 | 0.781 | 0.83 | 1 | MS.Trt_vs_MS.NoTrt_F |
| CUTC       | 3.38E-04 | -0.5202 | 0.158 | 0.3  | 1 | MS.Trt_vs_MS.NoTrt_F |
| PDIK1L     | 3.41E-04 | -1.056  | 0.068 | 0.18 | 1 | MS.Trt_vs_MS.NoTrt_F |
| MAT2A      | 3.43E-04 | -0.4273 | 0.151 | 0.3  | 1 | MS.Trt_vs_MS.NoTrt_F |
| BCAT1      | 3.45E-04 | 0.33971 | 0.41  | 0.55 | 1 | MS.Trt_vs_MS.NoTrt_F |
| AP2S1      | 3.46E-04 | 0.48271 | 0.144 | 0.3  | 1 | MS.Trt_vs_MS.NoTrt_F |
| GCC2       | 3.46E-04 | 0.26682 | 0.748 | 0.9  | 1 | MS.Trt_vs_MS.NoTrt_F |
| MAP4K1     | 3.48E-04 | -0.4148 | 0.878 | 0.94 | 1 | MS.Trt_vs_MS.NoTrt_F |
| PPP2R2A    | 3.49E-04 | -1.2659 | 0.129 | 0.27 | 1 | MS.Trt_vs_MS.NoTrt_F |
| PTBP2      | 3.51E-04 | 0.5395  | 0.554 | 0.72 | 1 | MS.Trt_vs_MS.NoTrt_F |
| S1PR4      | 3.51E-04 | -0.3971 | 0.147 | 0.29 | 1 | MS.Trt_vs_MS.NoTrt_F |
| GGT1       | 3.51E-04 | -0.4369 | 0.112 | 0.24 | 1 | MS.Trt_vs_MS.NoTrt_F |
| HELQ       | 3.51E-04 | -0.6303 | 0.126 | 0.27 | 1 | MS.Trt_vs_MS.NoTrt_F |
| NPIP6      | 3.52E-04 | -0.5432 | 0.194 | 0.33 | 1 | MS.Trt_vs_MS.NoTrt_F |
| SPATA13    | 3.53E-04 | -0.4398 | 0.46  | 0.6  | 1 | MS.Trt_vs_MS.NoTrt_F |
| SLK        | 3.53E-04 | -0.4187 | 0.176 | 0.32 | 1 | MS.Trt_vs_MS.NoTrt_F |

|            |          |         |       |      |   |                      |
|------------|----------|---------|-------|------|---|----------------------|
| LMTK2      | 3.56E-04 | 0.36844 | 0.216 | 0.37 | 1 | MS.Trt_vs_MS.NoTrt_F |
| GIMAP1-GIM | 3.57E-04 | -0.4469 | 0.076 | 0.19 | 1 | MS.Trt_vs_MS.NoTrt_F |
| ATAD3B     | 3.59E-04 | -0.5234 | 0.745 | 0.89 | 1 | MS.Trt_vs_MS.NoTrt_F |
| ELF2       | 3.63E-04 | -0.3533 | 0.626 | 0.75 | 1 | MS.Trt_vs_MS.NoTrt_F |
| SDHAF3     | 3.65E-04 | -0.3396 | 0.076 | 0.19 | 1 | MS.Trt_vs_MS.NoTrt_F |
| C5orf51    | 3.66E-04 | -0.715  | 0.112 | 0.24 | 1 | MS.Trt_vs_MS.NoTrt_F |
| GTF2F2     | 3.69E-04 | -0.3352 | 0.201 | 0.34 | 1 | MS.Trt_vs_MS.NoTrt_F |
| FAS        | 3.69E-04 | -0.5074 | 0.342 | 0.51 | 1 | MS.Trt_vs_MS.NoTrt_F |
| PTPN22     | 3.70E-04 | -0.3241 | 0.356 | 0.51 | 1 | MS.Trt_vs_MS.NoTrt_F |
| BACH1      | 3.72E-04 | -0.4391 | 0.223 | 0.39 | 1 | MS.Trt_vs_MS.NoTrt_F |
| EIF3CL     | 3.77E-04 | -0.2897 | 0.162 | 0.32 | 1 | MS.Trt_vs_MS.NoTrt_F |
| CYB5R1     | 3.78E-04 | -1.1826 | 0.108 | 0.23 | 1 | MS.Trt_vs_MS.NoTrt_F |
| WDR77      | 3.80E-04 | -0.6554 | 0.112 | 0.24 | 1 | MS.Trt_vs_MS.NoTrt_F |
| METTL4     | 3.80E-04 | -0.6468 | 0.112 | 0.24 | 1 | MS.Trt_vs_MS.NoTrt_F |
| ACP5       | 3.82E-04 | 0.28723 | 0.14  | 0.29 | 1 | MS.Trt_vs_MS.NoTrt_F |
| SRD5A1     | 3.84E-04 | -0.7183 | 0.59  | 0.75 | 1 | MS.Trt_vs_MS.NoTrt_F |
| MT-ND3     | 3.85E-04 | 0.42627 | 0.421 | 0.67 | 1 | MS.Trt_vs_MS.NoTrt_F |
| HAUS7      | 3.85E-04 | -1.3293 | 0.094 | 0.21 | 1 | MS.Trt_vs_MS.NoTrt_F |
| TAS2R4     | 3.85E-04 | -0.8202 | 0.317 | 0.47 | 1 | MS.Trt_vs_MS.NoTrt_F |
| CTNBL1     | 3.86E-04 | -0.3002 | 0.144 | 0.29 | 1 | MS.Trt_vs_MS.NoTrt_F |
| SLC41A1    | 3.87E-04 | -0.337  | 0.104 | 0.23 | 1 | MS.Trt_vs_MS.NoTrt_F |
| YTHDF1     | 3.87E-04 | 0.26019 | 0.068 | 0.18 | 1 | MS.Trt_vs_MS.NoTrt_F |
| LAPTM5     | 3.88E-04 | -0.2885 | 0.586 | 0.76 | 1 | MS.Trt_vs_MS.NoTrt_F |
| TAF4       | 3.89E-04 | -0.9637 | 0.126 | 0.26 | 1 | MS.Trt_vs_MS.NoTrt_F |
| DHFR2      | 3.89E-04 | 0.38928 | 0.597 | 0.69 | 1 | MS.Trt_vs_MS.NoTrt_F |
| MBD1       | 3.90E-04 | -0.4017 | 0.169 | 0.32 | 1 | MS.Trt_vs_MS.NoTrt_F |
| CENPH      | 3.91E-04 | -0.3035 | 0.255 | 0.41 | 1 | MS.Trt_vs_MS.NoTrt_F |
| NDUFA1     | 3.93E-04 | 0.26343 | 0.259 | 0.45 | 1 | MS.Trt_vs_MS.NoTrt_F |
| B3GAT2     | 3.93E-04 | 0.73021 | 0.169 | 0.31 | 1 | MS.Trt_vs_MS.NoTrt_F |
| RIPK1      | 3.95E-04 | -0.6381 | 0.158 | 0.29 | 1 | MS.Trt_vs_MS.NoTrt_F |
| DMPK       | 3.97E-04 | -0.3426 | 0.565 | 0.74 | 1 | MS.Trt_vs_MS.NoTrt_F |
| MADD       | 3.98E-04 | -0.3044 | 0.194 | 0.35 | 1 | MS.Trt_vs_MS.NoTrt_F |
| CPSF7      | 4.00E-04 | -0.5184 | 0.187 | 0.34 | 1 | MS.Trt_vs_MS.NoTrt_F |
| B3GAT1     | 4.02E-04 | -0.305  | 0.191 | 0.35 | 1 | MS.Trt_vs_MS.NoTrt_F |
| CLPTM1L    | 4.02E-04 | 0.72209 | 0.076 | 0.19 | 1 | MS.Trt_vs_MS.NoTrt_F |
| FABP7      | 4.03E-04 | -0.4291 | 0.133 | 0.26 | 1 | MS.Trt_vs_MS.NoTrt_F |
| SETD3      | 4.05E-04 | -0.8622 | 0.119 | 0.25 | 1 | MS.Trt_vs_MS.NoTrt_F |
| KRAS       | 4.05E-04 | -0.3367 | 0.317 | 0.48 | 1 | MS.Trt_vs_MS.NoTrt_F |
| RIPK3      | 4.08E-04 | -0.2973 | 0.076 | 0.19 | 1 | MS.Trt_vs_MS.NoTrt_F |
| AKAP11     | 4.09E-04 | -0.7975 | 0.194 | 0.34 | 1 | MS.Trt_vs_MS.NoTrt_F |

|           |          |         |       |      |   |                      |
|-----------|----------|---------|-------|------|---|----------------------|
| FARS2     | 4.14E-04 | -1.5259 | 0.086 | 0.2  | 1 | MS.Trt_vs_MS.NoTrt_F |
| EPHB6     | 4.16E-04 | -0.4318 | 0.101 | 0.22 | 1 | MS.Trt_vs_MS.NoTrt_F |
| TMEM38B   | 4.18E-04 | -0.4016 | 0.176 | 0.32 | 1 | MS.Trt_vs_MS.NoTrt_F |
| GPS1      | 4.20E-04 | -0.314  | 0.14  | 0.28 | 1 | MS.Trt_vs_MS.NoTrt_F |
| WAC       | 4.20E-04 | -0.4006 | 0.417 | 0.59 | 1 | MS.Trt_vs_MS.NoTrt_F |
| DOK1      | 4.21E-04 | -0.3584 | 0.09  | 0.2  | 1 | MS.Trt_vs_MS.NoTrt_F |
| BET1L     | 4.21E-04 | -0.3225 | 0.183 | 0.33 | 1 | MS.Trt_vs_MS.NoTrt_F |
| NDE1      | 4.23E-04 | -0.4187 | 0.723 | 0.85 | 1 | MS.Trt_vs_MS.NoTrt_F |
| CKS1B     | 4.25E-04 | 0.51081 | 0.173 | 0.32 | 1 | MS.Trt_vs_MS.NoTrt_F |
| MAGED1    | 4.25E-04 | -0.5422 | 0.633 | 0.79 | 1 | MS.Trt_vs_MS.NoTrt_F |
| THRA      | 4.25E-04 | -0.8313 | 0.104 | 0.23 | 1 | MS.Trt_vs_MS.NoTrt_F |
| SNX13     | 4.26E-04 | -0.4012 | 0.255 | 0.43 | 1 | MS.Trt_vs_MS.NoTrt_F |
| SMG5      | 4.30E-04 | -0.3133 | 0.187 | 0.34 | 1 | MS.Trt_vs_MS.NoTrt_F |
| SPSB3     | 4.32E-04 | 0.39728 | 0.266 | 0.46 | 1 | MS.Trt_vs_MS.NoTrt_F |
| TNFSF12   | 4.34E-04 | -0.3053 | 0.09  | 0.2  | 1 | MS.Trt_vs_MS.NoTrt_F |
| SPRYD3    | 4.35E-04 | -0.3955 | 0.155 | 0.3  | 1 | MS.Trt_vs_MS.NoTrt_F |
| PHC1      | 4.36E-04 | -0.5897 | 0.112 | 0.24 | 1 | MS.Trt_vs_MS.NoTrt_F |
| APH1A     | 4.37E-04 | -0.3327 | 0.18  | 0.33 | 1 | MS.Trt_vs_MS.NoTrt_F |
| BYSL      | 4.43E-04 | -2.5246 | 0.061 | 0.16 | 1 | MS.Trt_vs_MS.NoTrt_F |
| TUBG2     | 4.45E-04 | -1.0237 | 0.079 | 0.19 | 1 | MS.Trt_vs_MS.NoTrt_F |
| SERPINI1  | 4.46E-04 | -1.6192 | 0.054 | 0.15 | 1 | MS.Trt_vs_MS.NoTrt_F |
| SGTB      | 4.47E-04 | -0.3876 | 0.633 | 0.74 | 1 | MS.Trt_vs_MS.NoTrt_F |
| CD200     | 4.48E-04 | 0.94851 | 0.698 | 0.53 | 1 | MS.Trt_vs_MS.NoTrt_F |
| TRMU      | 4.48E-04 | -0.3771 | 0.216 | 0.38 | 1 | MS.Trt_vs_MS.NoTrt_F |
| FAM76B    | 0.00045  | -0.3828 | 0.101 | 0.22 | 1 | MS.Trt_vs_MS.NoTrt_F |
| TCF12     | 4.52E-04 | -0.7002 | 0.273 | 0.43 | 1 | MS.Trt_vs_MS.NoTrt_F |
| ZNF395    | 4.53E-04 | 0.31011 | 0.529 | 0.67 | 1 | MS.Trt_vs_MS.NoTrt_F |
| BLCAP     | 4.57E-04 | -0.3873 | 0.342 | 0.5  | 1 | MS.Trt_vs_MS.NoTrt_F |
| DNAJC27   | 4.61E-04 | -0.4223 | 0.083 | 0.19 | 1 | MS.Trt_vs_MS.NoTrt_F |
| PIAS3     | 4.61E-04 | 0.27348 | 0.115 | 0.25 | 1 | MS.Trt_vs_MS.NoTrt_F |
| MS4A10    | 4.62E-04 | 0.37402 | 0.773 | 0.64 | 1 | MS.Trt_vs_MS.NoTrt_F |
| TMEM42    | 4.65E-04 | -0.5052 | 0.147 | 0.28 | 1 | MS.Trt_vs_MS.NoTrt_F |
| BICD1     | 4.66E-04 | -0.9831 | 0.086 | 0.2  | 1 | MS.Trt_vs_MS.NoTrt_F |
| CSGALNACT | 4.66E-04 | -0.8068 | 0.151 | 0.29 | 1 | MS.Trt_vs_MS.NoTrt_F |
| PRPSAP2   | 4.69E-04 | -0.697  | 0.568 | 0.71 | 1 | MS.Trt_vs_MS.NoTrt_F |
| USP5      | 4.73E-04 | -0.6044 | 0.122 | 0.25 | 1 | MS.Trt_vs_MS.NoTrt_F |
| SLU7      | 4.73E-04 | -0.5711 | 0.396 | 0.55 | 1 | MS.Trt_vs_MS.NoTrt_F |
| ATP6V1C1  | 4.75E-04 | 0.4959  | 0.439 | 0.6  | 1 | MS.Trt_vs_MS.NoTrt_F |
| AMPD2     | 4.78E-04 | -1.1047 | 0.09  | 0.2  | 1 | MS.Trt_vs_MS.NoTrt_F |
| S100A11   | 4.79E-04 | 0.40684 | 0.374 | 0.62 | 1 | MS.Trt_vs_MS.NoTrt_F |

|            |          |         |       |      |   |                      |
|------------|----------|---------|-------|------|---|----------------------|
| MTRNR2L3   | 4.81E-04 | 0.26993 | 0.41  | 0.25 | 1 | MS.Trt_vs_MS.NoTrt_F |
| FOXK2      | 4.85E-04 | -0.5384 | 0.281 | 0.42 | 1 | MS.Trt_vs_MS.NoTrt_F |
| MRPS18A    | 4.86E-04 | 0.33598 | 0.112 | 0.24 | 1 | MS.Trt_vs_MS.NoTrt_F |
| ERBIN      | 4.86E-04 | -0.391  | 0.248 | 0.41 | 1 | MS.Trt_vs_MS.NoTrt_F |
| PABPC4     | 4.89E-04 | -0.3945 | 0.766 | 0.87 | 1 | MS.Trt_vs_MS.NoTrt_F |
| ZMYM2      | 4.90E-04 | -0.2989 | 0.342 | 0.5  | 1 | MS.Trt_vs_MS.NoTrt_F |
| EIF2S3     | 4.91E-04 | 0.57767 | 0.957 | 0.95 | 1 | MS.Trt_vs_MS.NoTrt_F |
| KIAA0825   | 4.91E-04 | 1.34103 | 0.302 | 0.47 | 1 | MS.Trt_vs_MS.NoTrt_F |
| DPM1       | 4.95E-04 | -0.7646 | 0.101 | 0.22 | 1 | MS.Trt_vs_MS.NoTrt_F |
| NCDN       | 4.99E-04 | -0.3609 | 0.173 | 0.32 | 1 | MS.Trt_vs_MS.NoTrt_F |
| ESRRA      | 5.03E-04 | -1.293  | 0.097 | 0.21 | 1 | MS.Trt_vs_MS.NoTrt_F |
| YIPF2      | 5.06E-04 | -0.4512 | 0.09  | 0.2  | 1 | MS.Trt_vs_MS.NoTrt_F |
| SPATA20    | 5.07E-04 | -0.5373 | 0.094 | 0.21 | 1 | MS.Trt_vs_MS.NoTrt_F |
| C5orf15    | 5.07E-04 | 0.44091 | 0.169 | 0.32 | 1 | MS.Trt_vs_MS.NoTrt_F |
| SLC35F2    | 5.08E-04 | -0.3549 | 0.288 | 0.43 | 1 | MS.Trt_vs_MS.NoTrt_F |
| ZNF646     | 5.10E-04 | -0.8961 | 0.072 | 0.18 | 1 | MS.Trt_vs_MS.NoTrt_F |
| UBTF       | 5.11E-04 | -0.5336 | 0.237 | 0.38 | 1 | MS.Trt_vs_MS.NoTrt_F |
| NARS2      | 5.13E-04 | -0.7722 | 0.317 | 0.49 | 1 | MS.Trt_vs_MS.NoTrt_F |
| ALDH16A1   | 5.17E-04 | -0.3975 | 0.626 | 0.77 | 1 | MS.Trt_vs_MS.NoTrt_F |
| C15orf39   | 5.18E-04 | -0.6847 | 0.065 | 0.17 | 1 | MS.Trt_vs_MS.NoTrt_F |
| ALKBH7     | 5.18E-04 | -0.2944 | 0.126 | 0.26 | 1 | MS.Trt_vs_MS.NoTrt_F |
| DNAJC11    | 5.18E-04 | -0.5964 | 0.187 | 0.33 | 1 | MS.Trt_vs_MS.NoTrt_F |
| STUB1      | 5.19E-04 | -0.2513 | 0.097 | 0.22 | 1 | MS.Trt_vs_MS.NoTrt_F |
| ZNF746     | 5.20E-04 | 0.32618 | 0.194 | 0.35 | 1 | MS.Trt_vs_MS.NoTrt_F |
| FAAP100    | 5.26E-04 | 0.50869 | 0.162 | 0.32 | 1 | MS.Trt_vs_MS.NoTrt_F |
| NPHP4      | 5.31E-04 | -0.7115 | 0.068 | 0.17 | 1 | MS.Trt_vs_MS.NoTrt_F |
| MZT1       | 5.33E-04 | -0.5644 | 0.058 | 0.16 | 1 | MS.Trt_vs_MS.NoTrt_F |
| HIPK2      | 5.40E-04 | -0.3235 | 0.094 | 0.21 | 1 | MS.Trt_vs_MS.NoTrt_F |
| SS18L2     | 5.41E-04 | -0.3431 | 0.345 | 0.5  | 1 | MS.Trt_vs_MS.NoTrt_F |
| AC138517.6 | 5.45E-04 | -1.0463 | 0.097 | 0.22 | 1 | MS.Trt_vs_MS.NoTrt_F |
| ZSCAN26    | 5.45E-04 | -1.2114 | 0.058 | 0.16 | 1 | MS.Trt_vs_MS.NoTrt_F |
| ZBTB7B     | 5.46E-04 | -0.5089 | 0.097 | 0.21 | 1 | MS.Trt_vs_MS.NoTrt_F |
| PITPNA     | 5.47E-04 | -1.0272 | 0.097 | 0.22 | 1 | MS.Trt_vs_MS.NoTrt_F |
| SDHAF4     | 5.47E-04 | -0.2762 | 0.655 | 0.79 | 1 | MS.Trt_vs_MS.NoTrt_F |
| NXT1       | 5.47E-04 | -0.7965 | 0.079 | 0.19 | 1 | MS.Trt_vs_MS.NoTrt_F |
| SSX5       | 5.49E-04 | -0.5262 | 0.137 | 0.27 | 1 | MS.Trt_vs_MS.NoTrt_F |
| ARFGEF2    | 5.51E-04 | -0.7787 | 0.406 | 0.57 | 1 | MS.Trt_vs_MS.NoTrt_F |
| CXCR4      | 5.51E-04 | -0.2796 | 0.27  | 0.44 | 1 | MS.Trt_vs_MS.NoTrt_F |
| SLC2A13    | 5.60E-04 | -0.5427 | 0.266 | 0.42 | 1 | MS.Trt_vs_MS.NoTrt_F |
| PEF1       | 5.60E-04 | -0.4294 | 0.158 | 0.3  | 1 | MS.Trt_vs_MS.NoTrt_F |

|            |          |         |       |      |   |                      |
|------------|----------|---------|-------|------|---|----------------------|
| KHNYN      | 5.66E-04 | -1.1439 | 0.083 | 0.19 | 1 | MS.Trt_vs_MS.NoTrt_F |
| AGPAT4     | 5.66E-04 | -0.2867 | 0.097 | 0.21 | 1 | MS.Trt_vs_MS.NoTrt_F |
| RPL18A     | 5.67E-04 | 0.44979 | 0.881 | 0.97 | 1 | MS.Trt_vs_MS.NoTrt_F |
| ZNF143     | 5.72E-04 | -0.667  | 0.112 | 0.23 | 1 | MS.Trt_vs_MS.NoTrt_F |
| ATP5I      | 5.73E-04 | 0.82885 | 0.255 | 0.47 | 1 | MS.Trt_vs_MS.NoTrt_F |
| SCAF11     | 5.75E-04 | 0.31973 | 0.871 | 0.93 | 1 | MS.Trt_vs_MS.NoTrt_F |
| RB1CC1     | 5.78E-04 | -0.4194 | 0.277 | 0.44 | 1 | MS.Trt_vs_MS.NoTrt_F |
| CAB39      | 5.79E-04 | 0.28517 | 0.277 | 0.44 | 1 | MS.Trt_vs_MS.NoTrt_F |
| SEC14L2    | 5.82E-04 | -0.372  | 0.122 | 0.25 | 1 | MS.Trt_vs_MS.NoTrt_F |
| RACGAP1    | 5.85E-04 | -1.0072 | 0.086 | 0.2  | 1 | MS.Trt_vs_MS.NoTrt_F |
| C12orf10   | 5.87E-04 | -0.4013 | 0.201 | 0.35 | 1 | MS.Trt_vs_MS.NoTrt_F |
| ZEB1       | 5.89E-04 | -0.6342 | 0.504 | 0.69 | 1 | MS.Trt_vs_MS.NoTrt_F |
| NAPRT      | 5.90E-04 | 0.34419 | 0.155 | 0.3  | 1 | MS.Trt_vs_MS.NoTrt_F |
| GNPDA1     | 5.91E-04 | -0.3221 | 0.076 | 0.18 | 1 | MS.Trt_vs_MS.NoTrt_F |
| PIBF1      | 5.91E-04 | 0.31034 | 0.14  | 0.28 | 1 | MS.Trt_vs_MS.NoTrt_F |
| NUDT16     | 5.91E-04 | -0.6456 | 0.068 | 0.17 | 1 | MS.Trt_vs_MS.NoTrt_F |
| TBC1D15    | 5.95E-04 | -1.6472 | 0.507 | 0.66 | 1 | MS.Trt_vs_MS.NoTrt_F |
| RP11-977G1 | 5.97E-04 | -0.2581 | 0.065 | 0.17 | 1 | MS.Trt_vs_MS.NoTrt_F |
| TG         | 5.98E-04 | -0.7932 | 0.112 | 0.23 | 1 | MS.Trt_vs_MS.NoTrt_F |
| MPHOSPH6   | 6.00E-04 | -0.5224 | 0.137 | 0.27 | 1 | MS.Trt_vs_MS.NoTrt_F |
| EIF2S1     | 6.01E-04 | 0.30752 | 0.252 | 0.43 | 1 | MS.Trt_vs_MS.NoTrt_F |
| ATAD3A     | 6.04E-04 | 0.36597 | 0.079 | 0.19 | 1 | MS.Trt_vs_MS.NoTrt_F |
| THEM6      | 6.12E-04 | -0.984  | 0.086 | 0.19 | 1 | MS.Trt_vs_MS.NoTrt_F |
| SLC2A3     | 6.13E-04 | -0.2738 | 0.845 | 0.93 | 1 | MS.Trt_vs_MS.NoTrt_F |
| KDM8       | 6.17E-04 | -0.4327 | 0.076 | 0.18 | 1 | MS.Trt_vs_MS.NoTrt_F |
| BCL9       | 6.18E-04 | -0.4016 | 0.09  | 0.2  | 1 | MS.Trt_vs_MS.NoTrt_F |
| AR         | 6.18E-04 | -0.6518 | 0.187 | 0.33 | 1 | MS.Trt_vs_MS.NoTrt_F |
| GPATCH3    | 6.19E-04 | -0.8843 | 0.068 | 0.17 | 1 | MS.Trt_vs_MS.NoTrt_F |
| MAP2K7     | 6.22E-04 | -0.2737 | 0.594 | 0.77 | 1 | MS.Trt_vs_MS.NoTrt_F |
| KIAA1468   | 6.27E-04 | -0.3223 | 0.295 | 0.45 | 1 | MS.Trt_vs_MS.NoTrt_F |
| ATF1       | 6.33E-04 | -1.0417 | 0.129 | 0.26 | 1 | MS.Trt_vs_MS.NoTrt_F |
| ATP13A1    | 6.33E-04 | -0.615  | 0.32  | 0.44 | 1 | MS.Trt_vs_MS.NoTrt_F |
| PSTPIP2    | 6.35E-04 | -0.5775 | 0.317 | 0.48 | 1 | MS.Trt_vs_MS.NoTrt_F |
| KATNAL1    | 6.35E-04 | -0.6279 | 0.522 | 0.64 | 1 | MS.Trt_vs_MS.NoTrt_F |
| FRA10AC1   | 6.38E-04 | 0.30736 | 0.489 | 0.69 | 1 | MS.Trt_vs_MS.NoTrt_F |
| LRRC14     | 6.49E-04 | 0.30423 | 0.079 | 0.19 | 1 | MS.Trt_vs_MS.NoTrt_F |
| CCDC58     | 6.58E-04 | -0.4048 | 0.27  | 0.43 | 1 | MS.Trt_vs_MS.NoTrt_F |
| B3GALT4    | 6.60E-04 | -1.0302 | 0.09  | 0.2  | 1 | MS.Trt_vs_MS.NoTrt_F |
| CDKN2A     | 6.60E-04 | -0.4086 | 0.076 | 0.18 | 1 | MS.Trt_vs_MS.NoTrt_F |
| VCPKMT     | 6.66E-04 | -1.077  | 0.101 | 0.22 | 1 | MS.Trt_vs_MS.NoTrt_F |

|            |          |         |       |      |   |                      |
|------------|----------|---------|-------|------|---|----------------------|
| LNPEP      | 6.67E-04 | -0.3477 | 0.529 | 0.67 | 1 | MS.Trt_vs_MS.NoTrt_F |
| PHF10      | 6.71E-04 | -0.2634 | 0.09  | 0.2  | 1 | MS.Trt_vs_MS.NoTrt_F |
| PTPN2      | 6.75E-04 | -0.6282 | 0.96  | 0.98 | 1 | MS.Trt_vs_MS.NoTrt_F |
| PITRM1     | 6.75E-04 | -0.2892 | 0.14  | 0.28 | 1 | MS.Trt_vs_MS.NoTrt_F |
| MOB2       | 6.77E-04 | -0.6442 | 0.14  | 0.27 | 1 | MS.Trt_vs_MS.NoTrt_F |
| VCPIP1     | 6.81E-04 | -0.389  | 0.371 | 0.53 | 1 | MS.Trt_vs_MS.NoTrt_F |
| CENPT      | 6.82E-04 | -0.2713 | 0.205 | 0.37 | 1 | MS.Trt_vs_MS.NoTrt_F |
| PIGT       | 6.85E-04 | -1.3005 | 0.097 | 0.21 | 1 | MS.Trt_vs_MS.NoTrt_F |
| IDUA       | 0.00069  | -0.6228 | 0.097 | 0.21 | 1 | MS.Trt_vs_MS.NoTrt_F |
| MPP7       | 6.88E-04 | -0.6749 | 0.266 | 0.41 | 1 | MS.Trt_vs_MS.NoTrt_F |
| VIPAS39    | 6.88E-04 | -1.0356 | 0.083 | 0.19 | 1 | MS.Trt_vs_MS.NoTrt_F |
| GLS        | 6.98E-04 | -0.3372 | 0.637 | 0.75 | 1 | MS.Trt_vs_MS.NoTrt_F |
| GNL3       | 7.08E-04 | 0.26616 | 0.137 | 0.27 | 1 | MS.Trt_vs_MS.NoTrt_F |
| DDX1       | 7.11E-04 | 0.50084 | 0.133 | 0.27 | 1 | MS.Trt_vs_MS.NoTrt_F |
| NHLRC3     | 7.20E-04 | 0.25246 | 0.345 | 0.5  | 1 | MS.Trt_vs_MS.NoTrt_F |
| ARPC4-TTLL | 7.22E-04 | 0.32018 | 0.126 | 0.25 | 1 | MS.Trt_vs_MS.NoTrt_F |
| ATF4       | 7.22E-04 | -0.3638 | 0.155 | 0.29 | 1 | MS.Trt_vs_MS.NoTrt_F |
| NOP14      | 7.22E-04 | -1.4609 | 0.392 | 0.55 | 1 | MS.Trt_vs_MS.NoTrt_F |
| CHKB-CPT1E | 7.23E-04 | -1.1268 | 0.036 | 0.12 | 1 | MS.Trt_vs_MS.NoTrt_F |
| MMGT1      | 7.25E-04 | -1.3583 | 0.097 | 0.21 | 1 | MS.Trt_vs_MS.NoTrt_F |
| GRAMD1A    | 7.27E-04 | 0.25371 | 0.651 | 0.79 | 1 | MS.Trt_vs_MS.NoTrt_F |
| CASP8AP2   | 7.27E-04 | -0.5643 | 0.291 | 0.44 | 1 | MS.Trt_vs_MS.NoTrt_F |
| ROBO1      | 7.28E-04 | 0.30348 | 0.651 | 0.48 | 1 | MS.Trt_vs_MS.NoTrt_F |
| ZC2HC1A    | 7.31E-04 | 0.34623 | 0.169 | 0.32 | 1 | MS.Trt_vs_MS.NoTrt_F |
| C1QTNF1    | 7.31E-04 | 0.5803  | 0.219 | 0.39 | 1 | MS.Trt_vs_MS.NoTrt_F |
| EMC4       | 7.32E-04 | 0.6978  | 1     | 0.99 | 1 | MS.Trt_vs_MS.NoTrt_F |
| ARHGEF6    | 7.35E-04 | 0.27908 | 0.309 | 0.49 | 1 | MS.Trt_vs_MS.NoTrt_F |
| OLFM2      | 7.39E-04 | -0.7547 | 0.09  | 0.2  | 1 | MS.Trt_vs_MS.NoTrt_F |
| RAB11B     | 7.40E-04 | -0.4568 | 0.453 | 0.62 | 1 | MS.Trt_vs_MS.NoTrt_F |
| OFD1       | 7.49E-04 | 0.54397 | 0.201 | 0.37 | 1 | MS.Trt_vs_MS.NoTrt_F |
| UTY        | 7.50E-04 | -1.8846 | 0.428 | 0.57 | 1 | MS.Trt_vs_MS.NoTrt_F |
| CPPED1     | 7.51E-04 | -0.8211 | 0.579 | 0.7  | 1 | MS.Trt_vs_MS.NoTrt_F |
| FAM122B    | 7.52E-04 | -0.4033 | 0.115 | 0.23 | 1 | MS.Trt_vs_MS.NoTrt_F |
| SPON2      | 7.58E-04 | -0.338  | 0.367 | 0.53 | 1 | MS.Trt_vs_MS.NoTrt_F |
| CHID1      | 7.65E-04 | -0.4639 | 0.248 | 0.4  | 1 | MS.Trt_vs_MS.NoTrt_F |
| ANKRD18A   | 7.66E-04 | -1.194  | 0.273 | 0.42 | 1 | MS.Trt_vs_MS.NoTrt_F |
| PAM16      | 7.75E-04 | -0.3385 | 0.144 | 0.28 | 1 | MS.Trt_vs_MS.NoTrt_F |
| SPDYE16    | 7.79E-04 | 0.72943 | 0.838 | 0.89 | 1 | MS.Trt_vs_MS.NoTrt_F |
| IQSEC1     | 7.82E-04 | -0.4836 | 0.191 | 0.34 | 1 | MS.Trt_vs_MS.NoTrt_F |
| SPDYE1     | 7.82E-04 | 0.99755 | 0.586 | 0.47 | 1 | MS.Trt_vs_MS.NoTrt_F |

|          |          |         |       |      |   |                      |
|----------|----------|---------|-------|------|---|----------------------|
| KARS     | 7.82E-04 | -0.469  | 0.212 | 0.36 | 1 | MS.Trt_vs_MS.NoTrt_F |
| NPRL2    | 7.82E-04 | -0.3032 | 0.151 | 0.29 | 1 | MS.Trt_vs_MS.NoTrt_F |
| INTS5    | 7.83E-04 | -1.123  | 0.076 | 0.18 | 1 | MS.Trt_vs_MS.NoTrt_F |
| CDK8     | 7.84E-04 | -1.7238 | 0.058 | 0.15 | 1 | MS.Trt_vs_MS.NoTrt_F |
| ZNF408   | 7.84E-04 | -1.7789 | 0.05  | 0.14 | 1 | MS.Trt_vs_MS.NoTrt_F |
| CANT1    | 7.87E-04 | -0.82   | 0.094 | 0.2  | 1 | MS.Trt_vs_MS.NoTrt_F |
| B4GALT3  | 7.88E-04 | -0.3068 | 0.191 | 0.34 | 1 | MS.Trt_vs_MS.NoTrt_F |
| RWDD4    | 7.98E-04 | 0.33041 | 0.094 | 0.21 | 1 | MS.Trt_vs_MS.NoTrt_F |
| RNF8     | 8.00E-04 | -0.7738 | 0.453 | 0.64 | 1 | MS.Trt_vs_MS.NoTrt_F |
| GRB10    | 8.02E-04 | -0.2556 | 0.183 | 0.32 | 1 | MS.Trt_vs_MS.NoTrt_F |
| IFRD1    | 8.05E-04 | 0.25892 | 0.417 | 0.58 | 1 | MS.Trt_vs_MS.NoTrt_F |
| TMEM120A | 8.07E-04 | 0.48782 | 0.137 | 0.28 | 1 | MS.Trt_vs_MS.NoTrt_F |
| NADK     | 8.07E-04 | 0.48808 | 0.23  | 0.38 | 1 | MS.Trt_vs_MS.NoTrt_F |
| SERTAD2  | 8.13E-04 | -0.474  | 0.115 | 0.24 | 1 | MS.Trt_vs_MS.NoTrt_F |
| ZNF398   | 8.14E-04 | -0.6843 | 0.165 | 0.3  | 1 | MS.Trt_vs_MS.NoTrt_F |
| PRCC     | 8.15E-04 | -0.432  | 0.151 | 0.29 | 1 | MS.Trt_vs_MS.NoTrt_F |
| KCTD5    | 8.25E-04 | -1.0012 | 0.086 | 0.19 | 1 | MS.Trt_vs_MS.NoTrt_F |
| CCDC97   | 8.30E-04 | -0.5336 | 0.147 | 0.28 | 1 | MS.Trt_vs_MS.NoTrt_F |
| NUP153   | 8.32E-04 | -0.4336 | 0.194 | 0.34 | 1 | MS.Trt_vs_MS.NoTrt_F |
| ERI3     | 8.35E-04 | -0.6879 | 0.094 | 0.2  | 1 | MS.Trt_vs_MS.NoTrt_F |
| FLYWCH1  | 8.36E-04 | -0.6795 | 0.759 | 0.9  | 1 | MS.Trt_vs_MS.NoTrt_F |
| SOAT1    | 8.39E-04 | -0.4026 | 0.676 | 0.79 | 1 | MS.Trt_vs_MS.NoTrt_F |
| ZNF717   | 8.41E-04 | -0.3225 | 0.05  | 0.14 | 1 | MS.Trt_vs_MS.NoTrt_F |
| ITGB3BP  | 8.46E-04 | -0.3326 | 0.665 | 0.83 | 1 | MS.Trt_vs_MS.NoTrt_F |
| DYNLT1   | 8.55E-04 | -0.3962 | 0.511 | 0.72 | 1 | MS.Trt_vs_MS.NoTrt_F |
| SFXN3    | 8.56E-04 | -0.2713 | 0.306 | 0.46 | 1 | MS.Trt_vs_MS.NoTrt_F |
| ZNF740   | 8.58E-04 | 0.30987 | 0.151 | 0.29 | 1 | MS.Trt_vs_MS.NoTrt_F |
| IKZF3    | 8.68E-04 | -0.272  | 0.953 | 1    | 1 | MS.Trt_vs_MS.NoTrt_F |
| CETN2    | 8.69E-04 | -0.741  | 0.043 | 0.13 | 1 | MS.Trt_vs_MS.NoTrt_F |
| C6orf226 | 8.71E-04 | -0.2539 | 0.043 | 0.13 | 1 | MS.Trt_vs_MS.NoTrt_F |
| MGAT5    | 8.75E-04 | -0.3223 | 0.14  | 0.27 | 1 | MS.Trt_vs_MS.NoTrt_F |
| ARAP2    | 8.75E-04 | 0.35792 | 0.291 | 0.45 | 1 | MS.Trt_vs_MS.NoTrt_F |
| FYCO1    | 8.76E-04 | -0.2586 | 0.176 | 0.32 | 1 | MS.Trt_vs_MS.NoTrt_F |
| IL15RA   | 8.76E-04 | -0.2598 | 0.112 | 0.23 | 1 | MS.Trt_vs_MS.NoTrt_F |
| POLDIP3  | 8.81E-04 | -0.5577 | 0.165 | 0.3  | 1 | MS.Trt_vs_MS.NoTrt_F |
| SCAMP3   | 8.81E-04 | -0.383  | 0.169 | 0.31 | 1 | MS.Trt_vs_MS.NoTrt_F |
| CISD1    | 8.85E-04 | 0.31667 | 0.094 | 0.2  | 1 | MS.Trt_vs_MS.NoTrt_F |
| ADAM12   | 8.86E-04 | -0.2915 | 0.212 | 0.37 | 1 | MS.Trt_vs_MS.NoTrt_F |
| ZC3H11A  | 8.86E-04 | -0.4995 | 0.212 | 0.35 | 1 | MS.Trt_vs_MS.NoTrt_F |
| GADD45B  | 8.89E-04 | -0.5804 | 0.129 | 0.25 | 1 | MS.Trt_vs_MS.NoTrt_F |

|            |          |         |       |      |   |                      |
|------------|----------|---------|-------|------|---|----------------------|
| RAVER1     | 8.92E-04 | -0.5209 | 0.147 | 0.28 | 1 | MS.Trt_vs_MS.NoTrt_F |
| HCFC2      | 8.94E-04 | -1.1554 | 0.079 | 0.18 | 1 | MS.Trt_vs_MS.NoTrt_F |
| DNAJB11    | 8.97E-04 | -0.3633 | 0.162 | 0.3  | 1 | MS.Trt_vs_MS.NoTrt_F |
| SMPD1      | 9.02E-04 | 0.25969 | 0.112 | 0.23 | 1 | MS.Trt_vs_MS.NoTrt_F |
| EGLN2      | 9.04E-04 | 0.32895 | 0.255 | 0.44 | 1 | MS.Trt_vs_MS.NoTrt_F |
| POLR2C     | 9.04E-04 | -0.4826 | 0.547 | 0.68 | 1 | MS.Trt_vs_MS.NoTrt_F |
| GLYR1      | 9.04E-04 | -0.5595 | 0.414 | 0.54 | 1 | MS.Trt_vs_MS.NoTrt_F |
| NCAPD3     | 9.04E-04 | -1.3718 | 0.079 | 0.18 | 1 | MS.Trt_vs_MS.NoTrt_F |
| ATG101     | 9.07E-04 | -0.625  | 0.072 | 0.17 | 1 | MS.Trt_vs_MS.NoTrt_F |
| FEZ2       | 9.07E-04 | -1.0302 | 0.46  | 0.61 | 1 | MS.Trt_vs_MS.NoTrt_F |
| MED20      | 9.07E-04 | -0.7926 | 0.32  | 0.48 | 1 | MS.Trt_vs_MS.NoTrt_F |
| EXOSC7     | 9.07E-04 | -0.3139 | 0.403 | 0.56 | 1 | MS.Trt_vs_MS.NoTrt_F |
| INSL6      | 9.09E-04 | -0.3059 | 0.295 | 0.46 | 1 | MS.Trt_vs_MS.NoTrt_F |
| VN1R2      | 9.11E-04 | -0.3416 | 0.079 | 0.18 | 1 | MS.Trt_vs_MS.NoTrt_F |
| SIGMAR1    | 9.13E-04 | -0.2687 | 0.183 | 0.33 | 1 | MS.Trt_vs_MS.NoTrt_F |
| SLC18B1    | 9.15E-04 | -1.2069 | 0.079 | 0.18 | 1 | MS.Trt_vs_MS.NoTrt_F |
| TLDC1      | 9.20E-04 | -0.5625 | 0.64  | 0.85 | 1 | MS.Trt_vs_MS.NoTrt_F |
| STARD5     | 9.22E-04 | -0.4592 | 0.133 | 0.25 | 1 | MS.Trt_vs_MS.NoTrt_F |
| HLX        | 9.22E-04 | -0.2703 | 0.173 | 0.3  | 1 | MS.Trt_vs_MS.NoTrt_F |
| HIGD1A     | 9.22E-04 | 0.46527 | 0.155 | 0.29 | 1 | MS.Trt_vs_MS.NoTrt_F |
| LCORL      | 9.28E-04 | 0.40455 | 0.112 | 0.23 | 1 | MS.Trt_vs_MS.NoTrt_F |
| DDX19B     | 9.28E-04 | -0.5033 | 0.414 | 0.57 | 1 | MS.Trt_vs_MS.NoTrt_F |
| ATP23      | 9.29E-04 | -0.2819 | 0.119 | 0.24 | 1 | MS.Trt_vs_MS.NoTrt_F |
| COA6       | 9.29E-04 | 0.32542 | 0.115 | 0.24 | 1 | MS.Trt_vs_MS.NoTrt_F |
| WRNIP1     | 9.34E-04 | 0.26276 | 0.079 | 0.18 | 1 | MS.Trt_vs_MS.NoTrt_F |
| NELFB      | 9.39E-04 | -0.5396 | 0.058 | 0.15 | 1 | MS.Trt_vs_MS.NoTrt_F |
| TIMD4      | 9.42E-04 | -0.4887 | 0.072 | 0.17 | 1 | MS.Trt_vs_MS.NoTrt_F |
| CUEDC2     | 9.45E-04 | 0.39459 | 0.115 | 0.24 | 1 | MS.Trt_vs_MS.NoTrt_F |
| TENM4      | 9.45E-04 | -0.2855 | 0.234 | 0.38 | 1 | MS.Trt_vs_MS.NoTrt_F |
| C19orf53   | 9.48E-04 | 0.29635 | 0.374 | 0.55 | 1 | MS.Trt_vs_MS.NoTrt_F |
| CTD-2583A1 | 9.48E-04 | -0.4162 | 0.076 | 0.18 | 1 | MS.Trt_vs_MS.NoTrt_F |
| PTGER4     | 9.49E-04 | 0.4234  | 0.173 | 0.32 | 1 | MS.Trt_vs_MS.NoTrt_F |
| FLYWCH2    | 9.50E-04 | -0.611  | 0.072 | 0.17 | 1 | MS.Trt_vs_MS.NoTrt_F |
| KPNA5      | 9.50E-04 | -0.3605 | 0.928 | 0.98 | 1 | MS.Trt_vs_MS.NoTrt_F |
| ZBTB45     | 9.53E-04 | -0.7242 | 0.054 | 0.14 | 1 | MS.Trt_vs_MS.NoTrt_F |
| TCF20      | 9.54E-04 | -0.6751 | 0.144 | 0.27 | 1 | MS.Trt_vs_MS.NoTrt_F |
| RIF1       | 9.54E-04 | -0.2969 | 0.522 | 0.71 | 1 | MS.Trt_vs_MS.NoTrt_F |
| ORMDL2     | 9.54E-04 | -0.4784 | 0.41  | 0.56 | 1 | MS.Trt_vs_MS.NoTrt_F |
| CTBP1      | 9.55E-04 | 0.25343 | 0.367 | 0.56 | 1 | MS.Trt_vs_MS.NoTrt_F |
| C1orf158   | 9.57E-04 | 0.63972 | 0.878 | 0.79 | 1 | MS.Trt_vs_MS.NoTrt_F |



|           |          |         |       |      |   |                      |
|-----------|----------|---------|-------|------|---|----------------------|
| AIM1L     | 9.60E-04 | -0.5889 | 0.061 | 0.16 | 1 | MS.Trt_vs_MS.NoTrt_F |
| HK1       | 9.60E-04 | -0.5192 | 0.522 | 0.66 | 1 | MS.Trt_vs_MS.NoTrt_F |
| VPS54     | 9.62E-04 | 0.51317 | 0.356 | 0.53 | 1 | MS.Trt_vs_MS.NoTrt_F |
| GSKIP     | 9.62E-04 | -0.3555 | 0.112 | 0.23 | 1 | MS.Trt_vs_MS.NoTrt_F |
| MYCBP     | 9.64E-04 | 0.39543 | 0.112 | 0.23 | 1 | MS.Trt_vs_MS.NoTrt_F |
| GNG5      | 9.64E-04 | 0.27041 | 0.252 | 0.43 | 1 | MS.Trt_vs_MS.NoTrt_F |
| KLRC1     | 9.64E-04 | 0.87059 | 0.266 | 0.44 | 1 | MS.Trt_vs_MS.NoTrt_F |
| TDP2      | 9.66E-04 | -0.2985 | 0.115 | 0.23 | 1 | MS.Trt_vs_MS.NoTrt_F |
| WAPL      | 9.67E-04 | -0.4565 | 0.406 | 0.58 | 1 | MS.Trt_vs_MS.NoTrt_F |
| FAM96A    | 9.70E-04 | -0.2506 | 0.295 | 0.45 | 1 | MS.Trt_vs_MS.NoTrt_F |
| FBXO28    | 9.72E-04 | -1.1011 | 0.108 | 0.22 | 1 | MS.Trt_vs_MS.NoTrt_F |
| ZCCHC14   | 9.73E-04 | -0.8337 | 0.079 | 0.18 | 1 | MS.Trt_vs_MS.NoTrt_F |
| TYSND1    | 9.76E-04 | 0.54694 | 0.23  | 0.38 | 1 | MS.Trt_vs_MS.NoTrt_F |
| TMTC2     | 9.77E-04 | -0.7839 | 0.065 | 0.16 | 1 | MS.Trt_vs_MS.NoTrt_F |
| CNOT3     | 9.84E-04 | -0.7312 | 0.137 | 0.26 | 1 | MS.Trt_vs_MS.NoTrt_F |
| CDKN1A    | 9.87E-04 | -0.4595 | 0.119 | 0.24 | 1 | MS.Trt_vs_MS.NoTrt_F |
| PKD2      | 9.88E-04 | 0.44085 | 0.173 | 0.31 | 1 | MS.Trt_vs_MS.NoTrt_F |
| LPAR2     | 9.89E-04 | 0.74236 | 0.129 | 0.25 | 1 | MS.Trt_vs_MS.NoTrt_F |
| COX6A1    | 9.90E-04 | 0.37728 | 0.162 | 0.3  | 1 | MS.Trt_vs_MS.NoTrt_F |
| ARFIP1    | 9.90E-04 | 0.30766 | 0.23  | 0.37 | 1 | MS.Trt_vs_MS.NoTrt_F |
| C1GALT1C1 | 9.92E-04 | -0.5373 | 0.068 | 0.17 | 1 | MS.Trt_vs_MS.NoTrt_F |
| MDM1      | 9.99E-04 | -0.8385 | 0.094 | 0.2  | 1 | MS.Trt_vs_MS.NoTrt_F |
| UHMK1     | 0.001    | 0.27704 | 0.255 | 0.41 | 1 | MS.Trt_vs_MS.NoTrt_F |
| SCFD2     | 0.001    | -0.2711 | 0.061 | 0.16 | 1 | MS.Trt_vs_MS.NoTrt_F |
| FUS       | 0.00101  | -0.287  | 0.842 | 0.9  | 1 | MS.Trt_vs_MS.NoTrt_F |
| ZSWIM6    | 0.00103  | -0.3073 | 0.076 | 0.18 | 1 | MS.Trt_vs_MS.NoTrt_F |
| FAM118B   | 0.00103  | -0.5598 | 0.068 | 0.17 | 1 | MS.Trt_vs_MS.NoTrt_F |
| GINM1     | 0.00103  | -0.3022 | 0.536 | 0.67 | 1 | MS.Trt_vs_MS.NoTrt_F |
| PPRC1     | 0.00104  | -0.5127 | 0.119 | 0.24 | 1 | MS.Trt_vs_MS.NoTrt_F |
| ALDH9A1   | 0.00104  | -0.4249 | 0.176 | 0.32 | 1 | MS.Trt_vs_MS.NoTrt_F |
| TMEM140   | 0.00104  | -0.2636 | 0.155 | 0.28 | 1 | MS.Trt_vs_MS.NoTrt_F |
| CACNA2D4  | 0.00104  | -0.3526 | 0.068 | 0.17 | 1 | MS.Trt_vs_MS.NoTrt_F |
| KCTD11    | 0.00104  | 0.5663  | 0.122 | 0.24 | 1 | MS.Trt_vs_MS.NoTrt_F |
| MYO5C     | 0.00104  | 0.70357 | 0.392 | 0.55 | 1 | MS.Trt_vs_MS.NoTrt_F |
| MASTL     | 0.00105  | 0.4201  | 0.076 | 0.18 | 1 | MS.Trt_vs_MS.NoTrt_F |
| ESF1      | 0.00105  | -0.3182 | 0.129 | 0.25 | 1 | MS.Trt_vs_MS.NoTrt_F |
| SP3       | 0.00105  | -1.0105 | 0.489 | 0.64 | 1 | MS.Trt_vs_MS.NoTrt_F |
| CWC15     | 0.00105  | 0.36146 | 0.201 | 0.37 | 1 | MS.Trt_vs_MS.NoTrt_F |
| PHF8      | 0.00106  | -0.5198 | 0.119 | 0.24 | 1 | MS.Trt_vs_MS.NoTrt_F |
| TCF19     | 0.00106  | -0.4161 | 0.061 | 0.16 | 1 | MS.Trt_vs_MS.NoTrt_F |

|            |         |         |       |      |   |                      |
|------------|---------|---------|-------|------|---|----------------------|
| EZH1       | 0.00106 | -0.6423 | 0.881 | 0.95 | 1 | MS.Trt_vs_MS.NoTrt_F |
| N4BP1      | 0.00106 | 0.25328 | 0.122 | 0.25 | 1 | MS.Trt_vs_MS.NoTrt_F |
| TAOK2      | 0.00106 | -0.3615 | 0.094 | 0.2  | 1 | MS.Trt_vs_MS.NoTrt_F |
| TAX1BP3    | 0.00107 | -0.6869 | 0.076 | 0.18 | 1 | MS.Trt_vs_MS.NoTrt_F |
| SLC25A35   | 0.00107 | -0.5763 | 0.137 | 0.27 | 1 | MS.Trt_vs_MS.NoTrt_F |
| PARP10     | 0.00107 | -0.2863 | 0.194 | 0.33 | 1 | MS.Trt_vs_MS.NoTrt_F |
| ZNF182     | 0.00107 | -0.9829 | 0.076 | 0.18 | 1 | MS.Trt_vs_MS.NoTrt_F |
| C4orf48    | 0.00107 | 0.62083 | 0.122 | 0.25 | 1 | MS.Trt_vs_MS.NoTrt_F |
| GK         | 0.00108 | -1.0005 | 0.187 | 0.34 | 1 | MS.Trt_vs_MS.NoTrt_F |
| DHRS12     | 0.00108 | -0.6946 | 0.09  | 0.2  | 1 | MS.Trt_vs_MS.NoTrt_F |
| STK25      | 0.0011  | -0.4491 | 0.633 | 0.78 | 1 | MS.Trt_vs_MS.NoTrt_F |
| CDK12      | 0.00111 | -0.7056 | 0.489 | 0.65 | 1 | MS.Trt_vs_MS.NoTrt_F |
| APTX       | 0.00111 | -0.3238 | 0.191 | 0.34 | 1 | MS.Trt_vs_MS.NoTrt_F |
| EHMT2      | 0.00111 | -0.9213 | 0.604 | 0.77 | 1 | MS.Trt_vs_MS.NoTrt_F |
| PIN4       | 0.00112 | 0.61806 | 0.129 | 0.26 | 1 | MS.Trt_vs_MS.NoTrt_F |
| SFSWAP     | 0.00112 | -0.4934 | 0.522 | 0.66 | 1 | MS.Trt_vs_MS.NoTrt_F |
| UBE2J1     | 0.00112 | 0.31439 | 0.18  | 0.32 | 1 | MS.Trt_vs_MS.NoTrt_F |
| COPG2      | 0.00112 | 1.2396  | 0.09  | 0.2  | 1 | MS.Trt_vs_MS.NoTrt_F |
| PDE4D      | 0.00112 | 0.43058 | 0.252 | 0.4  | 1 | MS.Trt_vs_MS.NoTrt_F |
| FUNDC2     | 0.00113 | -0.501  | 0.478 | 0.62 | 1 | MS.Trt_vs_MS.NoTrt_F |
| MRPS36     | 0.00114 | 0.43435 | 0.14  | 0.28 | 1 | MS.Trt_vs_MS.NoTrt_F |
| SNX12      | 0.00115 | -0.8625 | 0.094 | 0.2  | 1 | MS.Trt_vs_MS.NoTrt_F |
| EIF3J      | 0.00115 | 0.40074 | 0.165 | 0.32 | 1 | MS.Trt_vs_MS.NoTrt_F |
| PLGLB1     | 0.00115 | -0.3808 | 0.112 | 0.23 | 1 | MS.Trt_vs_MS.NoTrt_F |
| DHX38      | 0.00115 | -0.2949 | 0.119 | 0.24 | 1 | MS.Trt_vs_MS.NoTrt_F |
| MAPK14     | 0.00117 | -0.6249 | 0.133 | 0.25 | 1 | MS.Trt_vs_MS.NoTrt_F |
| TMEM50B    | 0.00117 | -0.3526 | 0.669 | 0.81 | 1 | MS.Trt_vs_MS.NoTrt_F |
| PHTF2      | 0.00117 | 0.32042 | 0.374 | 0.57 | 1 | MS.Trt_vs_MS.NoTrt_F |
| CALD1      | 0.00118 | 0.71844 | 0.191 | 0.32 | 1 | MS.Trt_vs_MS.NoTrt_F |
| TIAM2      | 0.00119 | -0.3191 | 0.748 | 0.86 | 1 | MS.Trt_vs_MS.NoTrt_F |
| YBX1       | 0.00119 | 0.35636 | 0.496 | 0.7  | 1 | MS.Trt_vs_MS.NoTrt_F |
| ZNF783     | 0.00119 | -0.7545 | 0.381 | 0.52 | 1 | MS.Trt_vs_MS.NoTrt_F |
| RTN3       | 0.0012  | -0.3032 | 0.155 | 0.28 | 1 | MS.Trt_vs_MS.NoTrt_F |
| SAFB2      | 0.0012  | -0.5552 | 0.831 | 0.9  | 1 | MS.Trt_vs_MS.NoTrt_F |
| SIM1       | 0.0012  | 0.90772 | 0.158 | 0.28 | 1 | MS.Trt_vs_MS.NoTrt_F |
| RP11-411B6 | 0.0012  | 0.25763 | 0.234 | 0.4  | 1 | MS.Trt_vs_MS.NoTrt_F |
| NCOA5      | 0.00122 | -0.293  | 0.129 | 0.25 | 1 | MS.Trt_vs_MS.NoTrt_F |
| WDR37      | 0.00123 | 0.25797 | 0.155 | 0.29 | 1 | MS.Trt_vs_MS.NoTrt_F |
| PSENE1     | 0.00123 | 0.41817 | 0.169 | 0.3  | 1 | MS.Trt_vs_MS.NoTrt_F |
| FAM214A    | 0.00123 | -0.2822 | 0.194 | 0.33 | 1 | MS.Trt_vs_MS.NoTrt_F |

|           |         |         |       |      |                        |
|-----------|---------|---------|-------|------|------------------------|
| SMG7      | 0.00125 | -0.3253 | 0.162 | 0.3  | 1 MS.Trt_vs_MS.NoTrt_F |
| NPDC1     | 0.00125 | -0.3307 | 0.072 | 0.17 | 1 MS.Trt_vs_MS.NoTrt_F |
| SLFN12    | 0.00125 | -0.5597 | 0.054 | 0.14 | 1 MS.Trt_vs_MS.NoTrt_F |
| HEXB      | 0.00125 | -0.3883 | 0.151 | 0.28 | 1 MS.Trt_vs_MS.NoTrt_F |
| PPP2R3C   | 0.00125 | -0.5144 | 0.176 | 0.3  | 1 MS.Trt_vs_MS.NoTrt_F |
| CHMP2B    | 0.00126 | 0.28747 | 0.144 | 0.27 | 1 MS.Trt_vs_MS.NoTrt_F |
| LMNA      | 0.00126 | -0.3833 | 0.651 | 0.76 | 1 MS.Trt_vs_MS.NoTrt_F |
| TOMM6     | 0.00128 | 0.27968 | 0.219 | 0.38 | 1 MS.Trt_vs_MS.NoTrt_F |
| IGFBPL1   | 0.00129 | -0.2613 | 0.518 | 0.65 | 1 MS.Trt_vs_MS.NoTrt_F |
| ATP5J2    | 0.00129 | 0.78572 | 0.331 | 0.53 | 1 MS.Trt_vs_MS.NoTrt_F |
| SLMAP     | 0.00129 | -0.5722 | 0.759 | 0.83 | 1 MS.Trt_vs_MS.NoTrt_F |
| SNW1      | 0.00129 | -0.264  | 0.234 | 0.38 | 1 MS.Trt_vs_MS.NoTrt_F |
| ARHGEF1   | 0.0013  | -0.3023 | 0.885 | 0.93 | 1 MS.Trt_vs_MS.NoTrt_F |
| DDX60     | 0.0013  | -0.3627 | 0.126 | 0.25 | 1 MS.Trt_vs_MS.NoTrt_F |
| FBXL5     | 0.00131 | 0.70129 | 0.234 | 0.42 | 1 MS.Trt_vs_MS.NoTrt_F |
| NFE2L3    | 0.00131 | -0.8955 | 0.083 | 0.18 | 1 MS.Trt_vs_MS.NoTrt_F |
| SMARCD1   | 0.00131 | -0.4991 | 0.101 | 0.21 | 1 MS.Trt_vs_MS.NoTrt_F |
| PDCD5     | 0.00131 | 0.27741 | 0.18  | 0.33 | 1 MS.Trt_vs_MS.NoTrt_F |
| TMEM9     | 0.00131 | -0.3051 | 0.09  | 0.19 | 1 MS.Trt_vs_MS.NoTrt_F |
| ADD3      | 0.00131 | -0.3588 | 0.716 | 0.82 | 1 MS.Trt_vs_MS.NoTrt_F |
| SSBP4     | 0.00132 | -0.6776 | 0.083 | 0.18 | 1 MS.Trt_vs_MS.NoTrt_F |
| PLAG1     | 0.00132 | 0.76961 | 0.367 | 0.52 | 1 MS.Trt_vs_MS.NoTrt_F |
| CAMTA1    | 0.00133 | 0.6125  | 0.165 | 0.3  | 1 MS.Trt_vs_MS.NoTrt_F |
| KLF7      | 0.00133 | 0.9579  | 0.133 | 0.25 | 1 MS.Trt_vs_MS.NoTrt_F |
| SUPT20H   | 0.00133 | -0.4569 | 0.414 | 0.56 | 1 MS.Trt_vs_MS.NoTrt_F |
| FBXW11    | 0.00133 | 0.52074 | 0.277 | 0.45 | 1 MS.Trt_vs_MS.NoTrt_F |
| ZBTB33    | 0.00133 | -0.4454 | 0.094 | 0.2  | 1 MS.Trt_vs_MS.NoTrt_F |
| PLAT      | 0.00135 | 0.27225 | 0.115 | 0.23 | 1 MS.Trt_vs_MS.NoTrt_F |
| CSNK2A2   | 0.00135 | -0.507  | 0.288 | 0.44 | 1 MS.Trt_vs_MS.NoTrt_F |
| TEP1      | 0.00136 | -0.4457 | 0.371 | 0.52 | 1 MS.Trt_vs_MS.NoTrt_F |
| SLC12A7   | 0.00136 | -0.4508 | 0.147 | 0.28 | 1 MS.Trt_vs_MS.NoTrt_F |
| CRAMP1    | 0.00136 | -0.8769 | 0.09  | 0.19 | 1 MS.Trt_vs_MS.NoTrt_F |
| PEX7      | 0.00136 | -0.6178 | 0.147 | 0.27 | 1 MS.Trt_vs_MS.NoTrt_F |
| ISYNA1    | 0.00136 | -0.6182 | 0.083 | 0.18 | 1 MS.Trt_vs_MS.NoTrt_F |
| SLC35C2   | 0.00136 | -0.4652 | 0.475 | 0.64 | 1 MS.Trt_vs_MS.NoTrt_F |
| HNRNPA1L2 | 0.00137 | -0.7001 | 0.227 | 0.38 | 1 MS.Trt_vs_MS.NoTrt_F |
| HDHD2     | 0.00137 | 0.44248 | 0.155 | 0.29 | 1 MS.Trt_vs_MS.NoTrt_F |
| GPR18     | 0.00137 | -0.6659 | 0.083 | 0.18 | 1 MS.Trt_vs_MS.NoTrt_F |
| METAP1D   | 0.00138 | -1.5767 | 0.036 | 0.11 | 1 MS.Trt_vs_MS.NoTrt_F |
| HRAS      | 0.00138 | -1.4819 | 0.04  | 0.12 | 1 MS.Trt_vs_MS.NoTrt_F |

|             |         |         |       |      |   |                      |
|-------------|---------|---------|-------|------|---|----------------------|
| FAM156A     | 0.00139 | -0.5424 | 0.155 | 0.27 | 1 | MS.Trt_vs_MS.NoTrt_F |
| POLDIP2     | 0.0014  | -0.3783 | 0.144 | 0.27 | 1 | MS.Trt_vs_MS.NoTrt_F |
| SF3A3       | 0.0014  | 0.28132 | 0.306 | 0.48 | 1 | MS.Trt_vs_MS.NoTrt_F |
| NFATC2      | 0.0014  | -0.2695 | 0.191 | 0.33 | 1 | MS.Trt_vs_MS.NoTrt_F |
| XAB2        | 0.00141 | 0.49881 | 0.219 | 0.37 | 1 | MS.Trt_vs_MS.NoTrt_F |
| NAA10       | 0.00141 | -0.5423 | 0.378 | 0.52 | 1 | MS.Trt_vs_MS.NoTrt_F |
| ATP9A       | 0.00141 | -0.277  | 0.219 | 0.35 | 1 | MS.Trt_vs_MS.NoTrt_F |
| CDC42       | 0.00141 | 0.68497 | 0.91  | 0.97 | 1 | MS.Trt_vs_MS.NoTrt_F |
| WDR4        | 0.00142 | -0.792  | 0.086 | 0.19 | 1 | MS.Trt_vs_MS.NoTrt_F |
| TWF1        | 0.00142 | -0.816  | 0.086 | 0.19 | 1 | MS.Trt_vs_MS.NoTrt_F |
| GLO1        | 0.00143 | -0.541  | 0.086 | 0.19 | 1 | MS.Trt_vs_MS.NoTrt_F |
| CDRT1       | 0.00143 | -1.77   | 0.036 | 0.11 | 1 | MS.Trt_vs_MS.NoTrt_F |
| ITPR3       | 0.00143 | -0.7867 | 0.119 | 0.24 | 1 | MS.Trt_vs_MS.NoTrt_F |
| ETV3        | 0.00144 | -0.342  | 0.18  | 0.32 | 1 | MS.Trt_vs_MS.NoTrt_F |
| C7orf55-LUC | 0.00144 | -0.5892 | 0.086 | 0.19 | 1 | MS.Trt_vs_MS.NoTrt_F |
| ADCK2       | 0.00144 | -2.0453 | 0.047 | 0.13 | 1 | MS.Trt_vs_MS.NoTrt_F |
| AGAP6       | 0.00145 | -0.3997 | 0.14  | 0.25 | 1 | MS.Trt_vs_MS.NoTrt_F |
| BEX2        | 0.00145 | -0.6151 | 0.086 | 0.19 | 1 | MS.Trt_vs_MS.NoTrt_F |
| FBXO7       | 0.00145 | -0.6616 | 0.277 | 0.41 | 1 | MS.Trt_vs_MS.NoTrt_F |
| C8orf44-SGk | 0.00145 | -0.7373 | 0.097 | 0.2  | 1 | MS.Trt_vs_MS.NoTrt_F |
| TAB3        | 0.00146 | -0.4079 | 0.665 | 0.81 | 1 | MS.Trt_vs_MS.NoTrt_F |
| LRRC61      | 0.00148 | -1.432  | 0.076 | 0.17 | 1 | MS.Trt_vs_MS.NoTrt_F |
| BCAP31      | 0.00148 | -0.6384 | 0.176 | 0.31 | 1 | MS.Trt_vs_MS.NoTrt_F |
| OSBPL10     | 0.00148 | 0.38619 | 0.356 | 0.5  | 1 | MS.Trt_vs_MS.NoTrt_F |
| SPATC1L     | 0.00148 | -1.1392 | 0.04  | 0.12 | 1 | MS.Trt_vs_MS.NoTrt_F |
| MKRN1       | 0.00148 | -0.3244 | 0.813 | 0.9  | 1 | MS.Trt_vs_MS.NoTrt_F |
| PAM         | 0.00148 | 0.28533 | 0.302 | 0.45 | 1 | MS.Trt_vs_MS.NoTrt_F |
| MLYCD       | 0.00148 | -1.3189 | 0.345 | 0.51 | 1 | MS.Trt_vs_MS.NoTrt_F |
| KAT6B       | 0.00148 | -0.3887 | 0.122 | 0.24 | 1 | MS.Trt_vs_MS.NoTrt_F |
| ANKRD17     | 0.00149 | -0.5302 | 0.198 | 0.34 | 1 | MS.Trt_vs_MS.NoTrt_F |
| SRGAP2B     | 0.0015  | -0.6419 | 0.439 | 0.6  | 1 | MS.Trt_vs_MS.NoTrt_F |
| TRAK1       | 0.0015  | -0.2709 | 0.09  | 0.19 | 1 | MS.Trt_vs_MS.NoTrt_F |
| MTERF3      | 0.00151 | -1.1101 | 0.216 | 0.34 | 1 | MS.Trt_vs_MS.NoTrt_F |
| TTC27       | 0.00151 | 0.88332 | 0.112 | 0.23 | 1 | MS.Trt_vs_MS.NoTrt_F |
| VKORC1      | 0.00151 | 0.33297 | 0.129 | 0.25 | 1 | MS.Trt_vs_MS.NoTrt_F |
| HOMER2      | 0.00151 | -0.9007 | 0.507 | 0.64 | 1 | MS.Trt_vs_MS.NoTrt_F |
| TTC4        | 0.00152 | -0.7962 | 0.094 | 0.2  | 1 | MS.Trt_vs_MS.NoTrt_F |
| RXRБ        | 0.00152 | -0.3127 | 0.183 | 0.32 | 1 | MS.Trt_vs_MS.NoTrt_F |
| PFDN1       | 0.00153 | -0.2873 | 0.162 | 0.29 | 1 | MS.Trt_vs_MS.NoTrt_F |
| BTRC        | 0.00153 | -0.5733 | 0.079 | 0.18 | 1 | MS.Trt_vs_MS.NoTrt_F |

|            |         |         |       |      |   |                      |
|------------|---------|---------|-------|------|---|----------------------|
| DCAF15     | 0.00153 | -1.2338 | 0.061 | 0.15 | 1 | MS.Trt_vs_MS.NoTrt_F |
| GNL1       | 0.00154 | -0.6679 | 0.094 | 0.2  | 1 | MS.Trt_vs_MS.NoTrt_F |
| RNF40      | 0.00155 | -0.4502 | 0.129 | 0.25 | 1 | MS.Trt_vs_MS.NoTrt_F |
| TMEM206    | 0.00155 | -0.9222 | 0.083 | 0.18 | 1 | MS.Trt_vs_MS.NoTrt_F |
| ABCA2      | 0.00155 | -0.2931 | 0.245 | 0.39 | 1 | MS.Trt_vs_MS.NoTrt_F |
| PI4K2A     | 0.00156 | -0.918  | 0.072 | 0.17 | 1 | MS.Trt_vs_MS.NoTrt_F |
| SHMT2      | 0.00157 | -0.3285 | 0.252 | 0.4  | 1 | MS.Trt_vs_MS.NoTrt_F |
| SURF6      | 0.00157 | -0.2589 | 0.5   | 0.67 | 1 | MS.Trt_vs_MS.NoTrt_F |
| BCAP29     | 0.00157 | -0.61   | 0.327 | 0.48 | 1 | MS.Trt_vs_MS.NoTrt_F |
| CBX7       | 0.00158 | 0.35784 | 0.381 | 0.54 | 1 | MS.Trt_vs_MS.NoTrt_F |
| RTF1       | 0.00158 | -0.4312 | 0.529 | 0.66 | 1 | MS.Trt_vs_MS.NoTrt_F |
| TXNDC16    | 0.00158 | 0.79972 | 0.115 | 0.23 | 1 | MS.Trt_vs_MS.NoTrt_F |
| C10orf128  | 0.00158 | -0.2941 | 0.079 | 0.18 | 1 | MS.Trt_vs_MS.NoTrt_F |
| ZBTB46     | 0.00159 | -0.9805 | 0.09  | 0.19 | 1 | MS.Trt_vs_MS.NoTrt_F |
| PI4K2B     | 0.00159 | -1.0513 | 0.05  | 0.13 | 1 | MS.Trt_vs_MS.NoTrt_F |
| RP5-864K19 | 0.00159 | -0.4914 | 0.047 | 0.13 | 1 | MS.Trt_vs_MS.NoTrt_F |
| TMEM43     | 0.00159 | -0.5474 | 0.198 | 0.33 | 1 | MS.Trt_vs_MS.NoTrt_F |
| ISCU       | 0.0016  | 0.35716 | 0.288 | 0.48 | 1 | MS.Trt_vs_MS.NoTrt_F |
| RELA       | 0.0016  | -0.9553 | 0.18  | 0.31 | 1 | MS.Trt_vs_MS.NoTrt_F |
| PPIH       | 0.0016  | -0.4625 | 0.09  | 0.19 | 1 | MS.Trt_vs_MS.NoTrt_F |
| ITGA5      | 0.0016  | 0.82321 | 0.104 | 0.22 | 1 | MS.Trt_vs_MS.NoTrt_F |
| MTMR2      | 0.00161 | 0.59696 | 0.169 | 0.29 | 1 | MS.Trt_vs_MS.NoTrt_F |
| FAM105A    | 0.00161 | -0.3872 | 0.245 | 0.38 | 1 | MS.Trt_vs_MS.NoTrt_F |
| MIGA2      | 0.00161 | -0.8413 | 0.424 | 0.55 | 1 | MS.Trt_vs_MS.NoTrt_F |
| DHX8       | 0.00161 | -0.4565 | 0.576 | 0.73 | 1 | MS.Trt_vs_MS.NoTrt_F |
| YWHAH      | 0.00161 | -0.3792 | 0.187 | 0.32 | 1 | MS.Trt_vs_MS.NoTrt_F |
| FGL2       | 0.00162 | -0.97   | 0.291 | 0.42 | 1 | MS.Trt_vs_MS.NoTrt_F |
| TMEM229B   | 0.00162 | -0.8012 | 0.205 | 0.35 | 1 | MS.Trt_vs_MS.NoTrt_F |
| RCHY1      | 0.00162 | -0.587  | 0.284 | 0.43 | 1 | MS.Trt_vs_MS.NoTrt_F |
| MTERF2     | 0.00162 | -0.511  | 0.076 | 0.17 | 1 | MS.Trt_vs_MS.NoTrt_F |
| ARHGAP11A  | 0.00163 | -1.4205 | 0.353 | 0.5  | 1 | MS.Trt_vs_MS.NoTrt_F |
| EIF5A      | 0.00163 | 1.10204 | 0.709 | 0.65 | 1 | MS.Trt_vs_MS.NoTrt_F |
| TXNDC11    | 0.00163 | -0.2621 | 0.324 | 0.49 | 1 | MS.Trt_vs_MS.NoTrt_F |
| CCR10      | 0.00164 | -0.3052 | 0.122 | 0.24 | 1 | MS.Trt_vs_MS.NoTrt_F |
| MAPK7      | 0.00164 | -0.8184 | 0.068 | 0.16 | 1 | MS.Trt_vs_MS.NoTrt_F |
| SLC8B1     | 0.00164 | -0.7136 | 0.446 | 0.59 | 1 | MS.Trt_vs_MS.NoTrt_F |
| RCC1       | 0.00164 | -0.6308 | 0.147 | 0.28 | 1 | MS.Trt_vs_MS.NoTrt_F |
| MARS2      | 0.00164 | -0.4498 | 0.065 | 0.16 | 1 | MS.Trt_vs_MS.NoTrt_F |
| CDCP1      | 0.00164 | 0.55602 | 0.554 | 0.41 | 1 | MS.Trt_vs_MS.NoTrt_F |
| BPIFB1     | 0.00165 | -0.5165 | 0.428 | 0.59 | 1 | MS.Trt_vs_MS.NoTrt_F |

|         |         |         |       |      |   |                      |
|---------|---------|---------|-------|------|---|----------------------|
| SCMH1   | 0.00165 | 0.63874 | 0.137 | 0.26 | 1 | MS.Trt_vs_MS.NoTrt_F |
| MTX2    | 0.00166 | -0.4882 | 0.245 | 0.39 | 1 | MS.Trt_vs_MS.NoTrt_F |
| FASTKD5 | 0.00166 | 0.41459 | 0.094 | 0.2  | 1 | MS.Trt_vs_MS.NoTrt_F |
| COPG1   | 0.00166 | -0.2652 | 0.183 | 0.32 | 1 | MS.Trt_vs_MS.NoTrt_F |
| ARFGEF1 | 0.00166 | -0.3406 | 0.572 | 0.74 | 1 | MS.Trt_vs_MS.NoTrt_F |
| PBX2    | 0.00166 | -0.3326 | 0.108 | 0.21 | 1 | MS.Trt_vs_MS.NoTrt_F |
| SSRP1   | 0.00166 | 0.3405  | 0.151 | 0.28 | 1 | MS.Trt_vs_MS.NoTrt_F |
| PDE3A   | 0.00166 | -0.6145 | 0.158 | 0.28 | 1 | MS.Trt_vs_MS.NoTrt_F |
| PGGHG   | 0.00167 | -0.8064 | 0.129 | 0.24 | 1 | MS.Trt_vs_MS.NoTrt_F |
| ELK1    | 0.00167 | -0.5342 | 0.083 | 0.18 | 1 | MS.Trt_vs_MS.NoTrt_F |
| PPCDC   | 0.00167 | 0.35818 | 0.086 | 0.19 | 1 | MS.Trt_vs_MS.NoTrt_F |
| EED     | 0.00167 | 0.55504 | 0.162 | 0.3  | 1 | MS.Trt_vs_MS.NoTrt_F |
| HIRA    | 0.00167 | 0.26623 | 0.061 | 0.15 | 1 | MS.Trt_vs_MS.NoTrt_F |
| MITF    | 0.00167 | -0.2963 | 0.144 | 0.26 | 1 | MS.Trt_vs_MS.NoTrt_F |
| TCF3    | 0.00167 | -0.6086 | 0.079 | 0.18 | 1 | MS.Trt_vs_MS.NoTrt_F |
| ITGA6   | 0.00168 | -0.3134 | 0.14  | 0.27 | 1 | MS.Trt_vs_MS.NoTrt_F |
| TRIM25  | 0.00168 | -0.4538 | 0.324 | 0.46 | 1 | MS.Trt_vs_MS.NoTrt_F |
| UBALD2  | 0.00169 | -0.5386 | 0.104 | 0.21 | 1 | MS.Trt_vs_MS.NoTrt_F |
| CCZ1B   | 0.0017  | -0.2513 | 0.662 | 0.77 | 1 | MS.Trt_vs_MS.NoTrt_F |
| ACTR8   | 0.00171 | -0.2701 | 0.083 | 0.18 | 1 | MS.Trt_vs_MS.NoTrt_F |
| ZW10    | 0.00171 | -0.7126 | 0.068 | 0.16 | 1 | MS.Trt_vs_MS.NoTrt_F |
| BORCS6  | 0.00171 | -0.7489 | 0.086 | 0.19 | 1 | MS.Trt_vs_MS.NoTrt_F |
| RBM17   | 0.00172 | 0.2877  | 0.342 | 0.53 | 1 | MS.Trt_vs_MS.NoTrt_F |
| ARMC5   | 0.00172 | 0.31919 | 0.115 | 0.23 | 1 | MS.Trt_vs_MS.NoTrt_F |
| PRKAB2  | 0.00172 | 0.97699 | 0.068 | 0.16 | 1 | MS.Trt_vs_MS.NoTrt_F |
| RPL41   | 0.00172 | 0.33822 | 0.942 | 1    | 1 | MS.Trt_vs_MS.NoTrt_F |
| HPF1    | 0.00173 | 0.68491 | 0.09  | 0.19 | 1 | MS.Trt_vs_MS.NoTrt_F |
| MANEA   | 0.00174 | -0.493  | 0.115 | 0.23 | 1 | MS.Trt_vs_MS.NoTrt_F |
| TMEM222 | 0.00174 | -0.5334 | 0.133 | 0.25 | 1 | MS.Trt_vs_MS.NoTrt_F |
| ACP2    | 0.00175 | -1.4832 | 0.068 | 0.16 | 1 | MS.Trt_vs_MS.NoTrt_F |
| TEX264  | 0.00175 | 0.26753 | 0.198 | 0.34 | 1 | MS.Trt_vs_MS.NoTrt_F |
| FLVCR2  | 0.00175 | -0.5761 | 0.058 | 0.14 | 1 | MS.Trt_vs_MS.NoTrt_F |
| EID3    | 0.00175 | -1.0648 | 0.058 | 0.14 | 1 | MS.Trt_vs_MS.NoTrt_F |
| CEP128  | 0.00176 | 0.29106 | 0.198 | 0.33 | 1 | MS.Trt_vs_MS.NoTrt_F |
| FASN    | 0.00176 | -0.9257 | 0.122 | 0.23 | 1 | MS.Trt_vs_MS.NoTrt_F |
| H2AFZ   | 0.00177 | 0.35439 | 0.345 | 0.56 | 1 | MS.Trt_vs_MS.NoTrt_F |
| E4F1    | 0.00177 | -0.6194 | 0.14  | 0.25 | 1 | MS.Trt_vs_MS.NoTrt_F |
| ABHD15  | 0.00177 | 1.41825 | 0.324 | 0.49 | 1 | MS.Trt_vs_MS.NoTrt_F |
| LRRC59  | 0.00177 | -0.2648 | 0.137 | 0.26 | 1 | MS.Trt_vs_MS.NoTrt_F |
| SVIP    | 0.00178 | -0.5771 | 0.45  | 0.62 | 1 | MS.Trt_vs_MS.NoTrt_F |

|          |         |         |       |      |   |                      |
|----------|---------|---------|-------|------|---|----------------------|
| REV3L    | 0.00179 | -0.2786 | 0.597 | 0.79 | 1 | MS.Trt_vs_MS.NoTrt_F |
| RPE      | 0.00179 | -0.823  | 0.32  | 0.45 | 1 | MS.Trt_vs_MS.NoTrt_F |
| DDX58    | 0.00179 | -0.7539 | 0.306 | 0.45 | 1 | MS.Trt_vs_MS.NoTrt_F |
| AMZ2     | 0.00179 | -0.2841 | 0.529 | 0.71 | 1 | MS.Trt_vs_MS.NoTrt_F |
| RCC2     | 0.00179 | -0.9188 | 0.112 | 0.22 | 1 | MS.Trt_vs_MS.NoTrt_F |
| NUTM2D   | 0.0018  | -0.7434 | 0.072 | 0.17 | 1 | MS.Trt_vs_MS.NoTrt_F |
| ZFAND6   | 0.0018  | -0.5086 | 0.237 | 0.37 | 1 | MS.Trt_vs_MS.NoTrt_F |
| FAM122A  | 0.0018  | -0.5825 | 0.065 | 0.16 | 1 | MS.Trt_vs_MS.NoTrt_F |
| GZMM     | 0.00181 | 0.26086 | 0.144 | 0.28 | 1 | MS.Trt_vs_MS.NoTrt_F |
| TACC1    | 0.00181 | -0.4131 | 0.468 | 0.6  | 1 | MS.Trt_vs_MS.NoTrt_F |
| U2AF2    | 0.00181 | -0.5705 | 0.173 | 0.3  | 1 | MS.Trt_vs_MS.NoTrt_F |
| RABEP1   | 0.00183 | 0.67338 | 0.209 | 0.36 | 1 | MS.Trt_vs_MS.NoTrt_F |
| OLAH     | 0.00184 | -0.3635 | 0.396 | 0.54 | 1 | MS.Trt_vs_MS.NoTrt_F |
| MRPL53   | 0.00184 | 0.40926 | 0.126 | 0.25 | 1 | MS.Trt_vs_MS.NoTrt_F |
| SPOUT1   | 0.00185 | 0.75878 | 0.158 | 0.29 | 1 | MS.Trt_vs_MS.NoTrt_F |
| FASTKD1  | 0.00186 | -0.3414 | 0.248 | 0.39 | 1 | MS.Trt_vs_MS.NoTrt_F |
| SLC19A1  | 0.00186 | 0.45916 | 0.068 | 0.16 | 1 | MS.Trt_vs_MS.NoTrt_F |
| EXOC6B   | 0.00186 | -0.7136 | 0.115 | 0.23 | 1 | MS.Trt_vs_MS.NoTrt_F |
| ZCCHC17  | 0.00186 | 0.43947 | 0.133 | 0.25 | 1 | MS.Trt_vs_MS.NoTrt_F |
| ACCS     | 0.00187 | -0.9284 | 0.076 | 0.17 | 1 | MS.Trt_vs_MS.NoTrt_F |
| HKDC1    | 0.00187 | 0.34004 | 0.068 | 0.16 | 1 | MS.Trt_vs_MS.NoTrt_F |
| ILVBL    | 0.00187 | 0.6941  | 0.234 | 0.39 | 1 | MS.Trt_vs_MS.NoTrt_F |
| GOLGA8B  | 0.00187 | 0.27967 | 0.719 | 0.82 | 1 | MS.Trt_vs_MS.NoTrt_F |
| KLRB1    | 0.00187 | 0.52558 | 0.158 | 0.29 | 1 | MS.Trt_vs_MS.NoTrt_F |
| IKZF4    | 0.00188 | 0.79175 | 0.18  | 0.32 | 1 | MS.Trt_vs_MS.NoTrt_F |
| YY1      | 0.00188 | 0.43112 | 0.288 | 0.43 | 1 | MS.Trt_vs_MS.NoTrt_F |
| ICOS     | 0.00188 | 0.40037 | 0.338 | 0.54 | 1 | MS.Trt_vs_MS.NoTrt_F |
| KIFAP3   | 0.00188 | 0.49197 | 0.147 | 0.27 | 1 | MS.Trt_vs_MS.NoTrt_F |
| U2AF1    | 0.00188 | -0.4724 | 0.507 | 0.64 | 1 | MS.Trt_vs_MS.NoTrt_F |
| MCMDC2   | 0.00188 | -0.2646 | 0.367 | 0.5  | 1 | MS.Trt_vs_MS.NoTrt_F |
| TMEM55B  | 0.00189 | -0.9852 | 0.09  | 0.19 | 1 | MS.Trt_vs_MS.NoTrt_F |
| RC3H1    | 0.00189 | 0.30978 | 0.464 | 0.66 | 1 | MS.Trt_vs_MS.NoTrt_F |
| HTT      | 0.00191 | -0.4501 | 0.23  | 0.37 | 1 | MS.Trt_vs_MS.NoTrt_F |
| KIAA0368 | 0.00191 | -0.8515 | 0.252 | 0.38 | 1 | MS.Trt_vs_MS.NoTrt_F |
| LRRC8D   | 0.00193 | 0.82499 | 0.122 | 0.24 | 1 | MS.Trt_vs_MS.NoTrt_F |
| CASP3    | 0.00194 | 0.36023 | 0.158 | 0.29 | 1 | MS.Trt_vs_MS.NoTrt_F |
| PTBP1    | 0.00194 | -0.3171 | 0.198 | 0.33 | 1 | MS.Trt_vs_MS.NoTrt_F |
| MTHFD1   | 0.00194 | -0.5731 | 0.867 | 0.92 | 1 | MS.Trt_vs_MS.NoTrt_F |
| IARS2    | 0.00194 | 0.25959 | 0.137 | 0.25 | 1 | MS.Trt_vs_MS.NoTrt_F |
| FER      | 0.00195 | -0.9654 | 0.424 | 0.59 | 1 | MS.Trt_vs_MS.NoTrt_F |

|          |         |         |       |      |   |                      |
|----------|---------|---------|-------|------|---|----------------------|
| WDYHV1   | 0.00197 | -0.4115 | 0.104 | 0.21 | 1 | MS.Trt_vs_MS.NoTrt_F |
| MCPH1    | 0.00197 | -0.354  | 0.601 | 0.75 | 1 | MS.Trt_vs_MS.NoTrt_F |
| ZNF415   | 0.00197 | 0.61621 | 0.295 | 0.44 | 1 | MS.Trt_vs_MS.NoTrt_F |
| MLH1     | 0.00198 | -0.4798 | 0.356 | 0.49 | 1 | MS.Trt_vs_MS.NoTrt_F |
| FBLN5    | 0.00198 | 0.3218  | 0.201 | 0.33 | 1 | MS.Trt_vs_MS.NoTrt_F |
| MRPL37   | 0.00199 | -0.4041 | 0.155 | 0.28 | 1 | MS.Trt_vs_MS.NoTrt_F |
| EFTUD2   | 0.00199 | -0.5326 | 0.759 | 0.83 | 1 | MS.Trt_vs_MS.NoTrt_F |
| DGCR2    | 0.002   | -0.5464 | 0.227 | 0.36 | 1 | MS.Trt_vs_MS.NoTrt_F |
| BRPF1    | 0.00202 | -0.3714 | 0.083 | 0.18 | 1 | MS.Trt_vs_MS.NoTrt_F |
| SSH3     | 0.00203 | -0.9243 | 0.072 | 0.17 | 1 | MS.Trt_vs_MS.NoTrt_F |
| 3-Mar    | 0.00203 | -0.6418 | 0.273 | 0.41 | 1 | MS.Trt_vs_MS.NoTrt_F |
| SIGIRR   | 0.00204 | 0.28344 | 0.302 | 0.48 | 1 | MS.Trt_vs_MS.NoTrt_F |
| ANAPC2   | 0.00205 | -0.7284 | 0.083 | 0.18 | 1 | MS.Trt_vs_MS.NoTrt_F |
| TMX1     | 0.00205 | -0.3087 | 0.374 | 0.54 | 1 | MS.Trt_vs_MS.NoTrt_F |
| ARHGAP29 | 0.00206 | -0.3251 | 0.381 | 0.53 | 1 | MS.Trt_vs_MS.NoTrt_F |
| ZNF585A  | 0.00207 | -0.6636 | 0.356 | 0.53 | 1 | MS.Trt_vs_MS.NoTrt_F |
| LRRFIP2  | 0.00207 | -0.3457 | 0.68  | 0.81 | 1 | MS.Trt_vs_MS.NoTrt_F |
| HERC5    | 0.00207 | -0.5388 | 0.147 | 0.27 | 1 | MS.Trt_vs_MS.NoTrt_F |
| ARHGEF28 | 0.00208 | 0.34056 | 0.173 | 0.3  | 1 | MS.Trt_vs_MS.NoTrt_F |
| B3GNT4   | 0.00208 | 0.5663  | 0.155 | 0.27 | 1 | MS.Trt_vs_MS.NoTrt_F |
| SLC25A45 | 0.00209 | 0.36983 | 0.978 | 0.98 | 1 | MS.Trt_vs_MS.NoTrt_F |
| NDOR1    | 0.00209 | -0.7868 | 0.079 | 0.17 | 1 | MS.Trt_vs_MS.NoTrt_F |
| KIZ      | 0.00211 | 0.38045 | 0.119 | 0.23 | 1 | MS.Trt_vs_MS.NoTrt_F |
| TMEM181  | 0.00211 | -0.3095 | 0.489 | 0.63 | 1 | MS.Trt_vs_MS.NoTrt_F |
| GPX2     | 0.00212 | -0.8826 | 0.162 | 0.29 | 1 | MS.Trt_vs_MS.NoTrt_F |
| DUSP6    | 0.00213 | -0.2504 | 0.068 | 0.16 | 1 | MS.Trt_vs_MS.NoTrt_F |
| ZDHHC8   | 0.00213 | -0.3193 | 0.101 | 0.2  | 1 | MS.Trt_vs_MS.NoTrt_F |
| PAIP2B   | 0.00214 | -1.2838 | 0.209 | 0.34 | 1 | MS.Trt_vs_MS.NoTrt_F |
| BLOC1S1  | 0.00214 | 0.58166 | 0.198 | 0.35 | 1 | MS.Trt_vs_MS.NoTrt_F |
| TMEM216  | 0.00215 | -0.4286 | 0.385 | 0.52 | 1 | MS.Trt_vs_MS.NoTrt_F |
| FBL      | 0.00216 | -0.3362 | 0.435 | 0.56 | 1 | MS.Trt_vs_MS.NoTrt_F |
| RNF114   | 0.00216 | -0.6227 | 0.665 | 0.8  | 1 | MS.Trt_vs_MS.NoTrt_F |
| MCM6     | 0.00218 | -0.257  | 0.108 | 0.22 | 1 | MS.Trt_vs_MS.NoTrt_F |
| PTGES3L  | 0.00218 | 0.32848 | 0.845 | 0.82 | 1 | MS.Trt_vs_MS.NoTrt_F |
| IQCB1    | 0.00218 | -0.8233 | 0.101 | 0.2  | 1 | MS.Trt_vs_MS.NoTrt_F |
| TUBA1A   | 0.00218 | -0.5548 | 0.234 | 0.36 | 1 | MS.Trt_vs_MS.NoTrt_F |
| UCHL3    | 0.00219 | 0.43312 | 0.144 | 0.27 | 1 | MS.Trt_vs_MS.NoTrt_F |
| AGTPBP1  | 0.00219 | 0.5015  | 0.165 | 0.3  | 1 | MS.Trt_vs_MS.NoTrt_F |
| TMEM128  | 0.00221 | 0.62881 | 0.155 | 0.28 | 1 | MS.Trt_vs_MS.NoTrt_F |
| RC3H2    | 0.00222 | -0.3285 | 0.482 | 0.61 | 1 | MS.Trt_vs_MS.NoTrt_F |



|            |         |         |       |      |   |                      |
|------------|---------|---------|-------|------|---|----------------------|
| RHEB       | 0.00223 | -0.2924 | 0.158 | 0.28 | 1 | MS.Trt_vs_MS.NoTrt_F |
| NDUFS6     | 0.00225 | 0.40729 | 0.137 | 0.26 | 1 | MS.Trt_vs_MS.NoTrt_F |
| LRCH4      | 0.00226 | 0.29292 | 0.446 | 0.61 | 1 | MS.Trt_vs_MS.NoTrt_F |
| FANCL      | 0.00227 | -0.4817 | 0.126 | 0.24 | 1 | MS.Trt_vs_MS.NoTrt_F |
| RP11-529K1 | 0.00227 | -0.4252 | 0.097 | 0.2  | 1 | MS.Trt_vs_MS.NoTrt_F |
| SLC35B2    | 0.00227 | -0.852  | 0.097 | 0.2  | 1 | MS.Trt_vs_MS.NoTrt_F |
| GRPEL2     | 0.00228 | 0.2734  | 0.266 | 0.4  | 1 | MS.Trt_vs_MS.NoTrt_F |
| SPIDR      | 0.00229 | -0.725  | 0.306 | 0.42 | 1 | MS.Trt_vs_MS.NoTrt_F |
| TSNARE1    | 0.00231 | -0.5493 | 0.09  | 0.19 | 1 | MS.Trt_vs_MS.NoTrt_F |
| SNRPC      | 0.00231 | 0.52066 | 0.227 | 0.39 | 1 | MS.Trt_vs_MS.NoTrt_F |
| FKBP15     | 0.00232 | -0.2975 | 0.133 | 0.25 | 1 | MS.Trt_vs_MS.NoTrt_F |
| VRK2       | 0.00233 | 0.488   | 0.223 | 0.36 | 1 | MS.Trt_vs_MS.NoTrt_F |
| SEPHS1     | 0.00233 | -0.7488 | 0.086 | 0.18 | 1 | MS.Trt_vs_MS.NoTrt_F |
| TSGA10     | 0.00234 | -0.629  | 0.101 | 0.2  | 1 | MS.Trt_vs_MS.NoTrt_F |
| BTN3A3     | 0.00236 | -0.4085 | 0.227 | 0.35 | 1 | MS.Trt_vs_MS.NoTrt_F |
| UBLCP1     | 0.0024  | 0.32051 | 0.176 | 0.31 | 1 | MS.Trt_vs_MS.NoTrt_F |
| CACNA1D    | 0.0024  | -0.2779 | 0.633 | 0.74 | 1 | MS.Trt_vs_MS.NoTrt_F |
| PCYOX1L    | 0.00241 | -0.8302 | 0.09  | 0.19 | 1 | MS.Trt_vs_MS.NoTrt_F |
| ATP6V1H    | 0.00241 | -0.4041 | 0.371 | 0.5  | 1 | MS.Trt_vs_MS.NoTrt_F |
| POLR3C     | 0.00243 | -0.3607 | 0.543 | 0.74 | 1 | MS.Trt_vs_MS.NoTrt_F |
| ST3GAL3    | 0.00245 | 0.44523 | 0.766 | 0.89 | 1 | MS.Trt_vs_MS.NoTrt_F |
| FAM49B     | 0.00245 | -0.5988 | 0.96  | 0.98 | 1 | MS.Trt_vs_MS.NoTrt_F |
| METTL5     | 0.00245 | -0.5257 | 0.507 | 0.62 | 1 | MS.Trt_vs_MS.NoTrt_F |
| RPS19      | 0.00245 | 0.43318 | 0.953 | 0.98 | 1 | MS.Trt_vs_MS.NoTrt_F |
| MED4       | 0.00245 | 0.31515 | 0.622 | 0.79 | 1 | MS.Trt_vs_MS.NoTrt_F |
| GTF3C6     | 0.00246 | 0.51562 | 0.162 | 0.3  | 1 | MS.Trt_vs_MS.NoTrt_F |
| PSD4       | 0.00248 | -0.3157 | 0.896 | 0.94 | 1 | MS.Trt_vs_MS.NoTrt_F |
| ATP6V0C    | 0.00249 | -0.4084 | 0.27  | 0.41 | 1 | MS.Trt_vs_MS.NoTrt_F |
| CDKAL1     | 0.00252 | -0.6446 | 0.529 | 0.67 | 1 | MS.Trt_vs_MS.NoTrt_F |
| P2RY10     | 0.00252 | -0.2509 | 0.338 | 0.48 | 1 | MS.Trt_vs_MS.NoTrt_F |
| SMIM15     | 0.00253 | -0.5335 | 0.115 | 0.22 | 1 | MS.Trt_vs_MS.NoTrt_F |
| GYS1       | 0.00255 | 0.35077 | 0.155 | 0.28 | 1 | MS.Trt_vs_MS.NoTrt_F |
| SUV39H1    | 0.00256 | -1.2977 | 0.065 | 0.15 | 1 | MS.Trt_vs_MS.NoTrt_F |
| DCTD       | 0.0026  | 0.25124 | 0.14  | 0.26 | 1 | MS.Trt_vs_MS.NoTrt_F |
| PLEKHF2    | 0.0026  | -0.2562 | 0.104 | 0.2  | 1 | MS.Trt_vs_MS.NoTrt_F |
| NPB        | 0.0026  | -0.2627 | 0.05  | 0.13 | 1 | MS.Trt_vs_MS.NoTrt_F |
| TCEAL4     | 0.00261 | -0.47   | 0.162 | 0.28 | 1 | MS.Trt_vs_MS.NoTrt_F |
| ACYP1      | 0.00261 | -0.2523 | 0.216 | 0.35 | 1 | MS.Trt_vs_MS.NoTrt_F |
| ZNF391     | 0.00262 | -0.3439 | 0.191 | 0.32 | 1 | MS.Trt_vs_MS.NoTrt_F |
| C18orf21   | 0.00263 | -0.4029 | 0.076 | 0.17 | 1 | MS.Trt_vs_MS.NoTrt_F |

|            |         |         |       |      |   |                      |
|------------|---------|---------|-------|------|---|----------------------|
| TJP3       | 0.00263 | -1.0267 | 0.108 | 0.21 | 1 | MS.Trt_vs_MS.NoTrt_F |
| CCR6       | 0.00264 | -0.4546 | 0.399 | 0.53 | 1 | MS.Trt_vs_MS.NoTrt_F |
| FAM21C     | 0.00265 | -0.2897 | 0.212 | 0.35 | 1 | MS.Trt_vs_MS.NoTrt_F |
| ZMYM4      | 0.00266 | -0.9075 | 0.151 | 0.26 | 1 | MS.Trt_vs_MS.NoTrt_F |
| NIPSNAP3A  | 0.00267 | -0.7539 | 0.072 | 0.16 | 1 | MS.Trt_vs_MS.NoTrt_F |
| UNC119B    | 0.00268 | -1.6639 | 0.065 | 0.15 | 1 | MS.Trt_vs_MS.NoTrt_F |
| AL078584.1 | 0.00269 | -0.9022 | 0.424 | 0.53 | 1 | MS.Trt_vs_MS.NoTrt_F |
| NOP9       | 0.00271 | -1.0439 | 0.061 | 0.14 | 1 | MS.Trt_vs_MS.NoTrt_F |
| CGGBP1     | 0.00271 | 0.58754 | 0.205 | 0.34 | 1 | MS.Trt_vs_MS.NoTrt_F |
| APEH       | 0.00271 | -0.2559 | 0.191 | 0.32 | 1 | MS.Trt_vs_MS.NoTrt_F |
| NEK1       | 0.00271 | -0.3554 | 0.313 | 0.45 | 1 | MS.Trt_vs_MS.NoTrt_F |
| TRIO       | 0.00271 | -0.7488 | 0.065 | 0.15 | 1 | MS.Trt_vs_MS.NoTrt_F |
| TXNDC12    | 0.00271 | 0.52033 | 0.158 | 0.28 | 1 | MS.Trt_vs_MS.NoTrt_F |
| NOP10      | 0.00272 | 0.54621 | 0.234 | 0.4  | 1 | MS.Trt_vs_MS.NoTrt_F |
| PFKL       | 0.00272 | -0.4787 | 0.709 | 0.79 | 1 | MS.Trt_vs_MS.NoTrt_F |
| USP25      | 0.00273 | 0.9334  | 0.374 | 0.56 | 1 | MS.Trt_vs_MS.NoTrt_F |
| ZNHIT6     | 0.00273 | -0.3613 | 0.392 | 0.51 | 1 | MS.Trt_vs_MS.NoTrt_F |
| RHOBTB2    | 0.00273 | -0.9747 | 0.079 | 0.17 | 1 | MS.Trt_vs_MS.NoTrt_F |
| RGL2       | 0.00274 | -0.4777 | 0.151 | 0.27 | 1 | MS.Trt_vs_MS.NoTrt_F |
| FTSJ1      | 0.00275 | 0.36845 | 0.14  | 0.26 | 1 | MS.Trt_vs_MS.NoTrt_F |
| BLOC1S2    | 0.00277 | 0.27139 | 0.5   | 0.66 | 1 | MS.Trt_vs_MS.NoTrt_F |
| ARRB2      | 0.00277 | -0.5162 | 0.766 | 0.88 | 1 | MS.Trt_vs_MS.NoTrt_F |
| OSBPL11    | 0.00278 | -0.2655 | 0.108 | 0.21 | 1 | MS.Trt_vs_MS.NoTrt_F |
| ETAA1      | 0.00278 | 0.35125 | 0.147 | 0.27 | 1 | MS.Trt_vs_MS.NoTrt_F |
| FOSL2      | 0.00278 | -0.2925 | 0.245 | 0.39 | 1 | MS.Trt_vs_MS.NoTrt_F |
| HMGA1      | 0.00278 | -0.2541 | 0.176 | 0.3  | 1 | MS.Trt_vs_MS.NoTrt_F |
| IRS2       | 0.00279 | -0.4504 | 0.363 | 0.49 | 1 | MS.Trt_vs_MS.NoTrt_F |
| PIGV       | 0.00279 | -0.7876 | 0.068 | 0.16 | 1 | MS.Trt_vs_MS.NoTrt_F |
| KCTD13     | 0.00279 | 0.41836 | 0.158 | 0.28 | 1 | MS.Trt_vs_MS.NoTrt_F |
| IL17RB     | 0.0028  | -2.2636 | 0.04  | 0.11 | 1 | MS.Trt_vs_MS.NoTrt_F |
| MRPS14     | 0.0028  | 0.26966 | 0.169 | 0.3  | 1 | MS.Trt_vs_MS.NoTrt_F |
| TOMM22     | 0.00283 | -0.4443 | 0.201 | 0.33 | 1 | MS.Trt_vs_MS.NoTrt_F |
| C2CD2      | 0.00283 | -0.9367 | 0.219 | 0.33 | 1 | MS.Trt_vs_MS.NoTrt_F |
| OCM        | 0.00286 | -0.6639 | 0.04  | 0.11 | 1 | MS.Trt_vs_MS.NoTrt_F |
| ZNF12      | 0.00286 | -1.0712 | 0.317 | 0.45 | 1 | MS.Trt_vs_MS.NoTrt_F |
| MRPL55     | 0.00286 | 0.89556 | 0.108 | 0.21 | 1 | MS.Trt_vs_MS.NoTrt_F |
| ELP5       | 0.00287 | -0.3559 | 0.112 | 0.22 | 1 | MS.Trt_vs_MS.NoTrt_F |
| FHOD1      | 0.00287 | 1.12701 | 0.169 | 0.3  | 1 | MS.Trt_vs_MS.NoTrt_F |
| SLC14A2    | 0.00288 | -0.2554 | 0.633 | 0.79 | 1 | MS.Trt_vs_MS.NoTrt_F |
| NUDT5      | 0.00288 | 0.40666 | 0.209 | 0.37 | 1 | MS.Trt_vs_MS.NoTrt_F |

|            |         |         |       |      |   |                      |
|------------|---------|---------|-------|------|---|----------------------|
| BBS7       | 0.00289 | -0.8809 | 0.072 | 0.16 | 1 | MS.Trt_vs_MS.NoTrt_F |
| ALCAM      | 0.00289 | -0.929  | 0.072 | 0.16 | 1 | MS.Trt_vs_MS.NoTrt_F |
| FBXO21     | 0.0029  | 0.25641 | 0.169 | 0.3  | 1 | MS.Trt_vs_MS.NoTrt_F |
| G2E3       | 0.00291 | -0.5898 | 0.457 | 0.58 | 1 | MS.Trt_vs_MS.NoTrt_F |
| DHX34      | 0.00291 | 0.38725 | 0.094 | 0.19 | 1 | MS.Trt_vs_MS.NoTrt_F |
| ZBTB39     | 0.00292 | -1.5226 | 0.043 | 0.12 | 1 | MS.Trt_vs_MS.NoTrt_F |
| PDE4A      | 0.00293 | -0.6198 | 0.115 | 0.22 | 1 | MS.Trt_vs_MS.NoTrt_F |
| NFX1       | 0.00293 | -0.5521 | 0.784 | 0.9  | 1 | MS.Trt_vs_MS.NoTrt_F |
| PHF5A      | 0.00293 | -0.3253 | 0.129 | 0.24 | 1 | MS.Trt_vs_MS.NoTrt_F |
| COG5       | 0.00293 | 1.39773 | 0.198 | 0.34 | 1 | MS.Trt_vs_MS.NoTrt_F |
| ADGRE1     | 0.00293 | -0.3666 | 0.047 | 0.12 | 1 | MS.Trt_vs_MS.NoTrt_F |
| PSMA4      | 0.00294 | 0.37355 | 0.356 | 0.5  | 1 | MS.Trt_vs_MS.NoTrt_F |
| PLEC       | 0.00294 | 0.38083 | 0.309 | 0.48 | 1 | MS.Trt_vs_MS.NoTrt_F |
| ZNF275     | 0.00295 | -1.6346 | 0.058 | 0.14 | 1 | MS.Trt_vs_MS.NoTrt_F |
| POFUT2     | 0.00295 | -0.9693 | 0.072 | 0.16 | 1 | MS.Trt_vs_MS.NoTrt_F |
| MAP3K14    | 0.00296 | -0.3013 | 0.158 | 0.28 | 1 | MS.Trt_vs_MS.NoTrt_F |
| NKRF       | 0.00296 | -0.5851 | 0.083 | 0.18 | 1 | MS.Trt_vs_MS.NoTrt_F |
| DUS2       | 0.00296 | -0.9697 | 0.076 | 0.17 | 1 | MS.Trt_vs_MS.NoTrt_F |
| NR1D1      | 0.00296 | -0.5956 | 0.112 | 0.22 | 1 | MS.Trt_vs_MS.NoTrt_F |
| NFKBIZ     | 0.00296 | -0.3667 | 0.36  | 0.5  | 1 | MS.Trt_vs_MS.NoTrt_F |
| DDX24      | 0.00296 | -0.2797 | 0.532 | 0.67 | 1 | MS.Trt_vs_MS.NoTrt_F |
| LMLN       | 0.00296 | -1.6868 | 0.353 | 0.5  | 1 | MS.Trt_vs_MS.NoTrt_F |
| UNC79      | 0.00297 | -0.3878 | 0.317 | 0.45 | 1 | MS.Trt_vs_MS.NoTrt_F |
| SPNS1      | 0.00299 | -0.5545 | 0.755 | 0.92 | 1 | MS.Trt_vs_MS.NoTrt_F |
| LEAP2      | 0.00299 | -0.4845 | 0.23  | 0.38 | 1 | MS.Trt_vs_MS.NoTrt_F |
| SNAPC4     | 0.00299 | -0.2663 | 0.058 | 0.14 | 1 | MS.Trt_vs_MS.NoTrt_F |
| INVS       | 0.00299 | -0.9219 | 0.147 | 0.26 | 1 | MS.Trt_vs_MS.NoTrt_F |
| EXOC6      | 0.003   | -0.5763 | 0.259 | 0.38 | 1 | MS.Trt_vs_MS.NoTrt_F |
| AC009950.1 | 0.00301 | -0.4503 | 0.072 | 0.16 | 1 | MS.Trt_vs_MS.NoTrt_F |
| SWT1       | 0.00301 | -0.4859 | 0.076 | 0.17 | 1 | MS.Trt_vs_MS.NoTrt_F |
| NT5DC1     | 0.00301 | -0.3308 | 0.173 | 0.3  | 1 | MS.Trt_vs_MS.NoTrt_F |
| PAGR1      | 0.00302 | -0.2583 | 0.205 | 0.34 | 1 | MS.Trt_vs_MS.NoTrt_F |
| IFIH1      | 0.00304 | -1.2839 | 0.043 | 0.12 | 1 | MS.Trt_vs_MS.NoTrt_F |
| FAM175B    | 0.00304 | -0.69   | 0.068 | 0.16 | 1 | MS.Trt_vs_MS.NoTrt_F |
| TDP1       | 0.00305 | -0.3221 | 0.299 | 0.42 | 1 | MS.Trt_vs_MS.NoTrt_F |
| GLOD4      | 0.00306 | -0.3111 | 0.594 | 0.72 | 1 | MS.Trt_vs_MS.NoTrt_F |
| CCT6A      | 0.00309 | 0.30839 | 0.46  | 0.67 | 1 | MS.Trt_vs_MS.NoTrt_F |
| TMEM242    | 0.0031  | -0.452  | 0.129 | 0.24 | 1 | MS.Trt_vs_MS.NoTrt_F |
| NDUFA13    | 0.0031  | 0.32206 | 0.475 | 0.65 | 1 | MS.Trt_vs_MS.NoTrt_F |
| ATIC       | 0.0031  | -0.3846 | 0.338 | 0.46 | 1 | MS.Trt_vs_MS.NoTrt_F |

|            |         |         |       |      |                        |
|------------|---------|---------|-------|------|------------------------|
| TAOK3      | 0.00312 | 0.41092 | 0.745 | 0.85 | 1 MS.Trt_vs_MS.NoTrt_F |
| TNPO3      | 0.00312 | -0.5592 | 0.18  | 0.3  | 1 MS.Trt_vs_MS.NoTrt_F |
| STRBP      | 0.00312 | -0.6763 | 0.572 | 0.72 | 1 MS.Trt_vs_MS.NoTrt_F |
| TGIF2      | 0.00312 | -0.5618 | 0.27  | 0.41 | 1 MS.Trt_vs_MS.NoTrt_F |
| ARMC2      | 0.00313 | -0.5293 | 0.097 | 0.19 | 1 MS.Trt_vs_MS.NoTrt_F |
| CMPK1      | 0.00314 | 0.26081 | 0.23  | 0.37 | 1 MS.Trt_vs_MS.NoTrt_F |
| CPNE2      | 0.00314 | -0.5647 | 0.349 | 0.47 | 1 MS.Trt_vs_MS.NoTrt_F |
| TRMO       | 0.00314 | -0.2823 | 0.144 | 0.27 | 1 MS.Trt_vs_MS.NoTrt_F |
| LTV1       | 0.00315 | -0.3352 | 0.144 | 0.26 | 1 MS.Trt_vs_MS.NoTrt_F |
| NAT6       | 0.00316 | 0.38463 | 0.076 | 0.17 | 1 MS.Trt_vs_MS.NoTrt_F |
| MMP13      | 0.00316 | -0.3166 | 0.101 | 0.2  | 1 MS.Trt_vs_MS.NoTrt_F |
| ZNF600     | 0.00319 | -0.7043 | 0.201 | 0.32 | 1 MS.Trt_vs_MS.NoTrt_F |
| LYRM5      | 0.0032  | -0.5879 | 0.079 | 0.17 | 1 MS.Trt_vs_MS.NoTrt_F |
| SNX20      | 0.0032  | -0.3216 | 0.446 | 0.56 | 1 MS.Trt_vs_MS.NoTrt_F |
| MLANA      | 0.00323 | -0.3215 | 0.385 | 0.55 | 1 MS.Trt_vs_MS.NoTrt_F |
| PHF2       | 0.00323 | 0.49625 | 0.072 | 0.16 | 1 MS.Trt_vs_MS.NoTrt_F |
| FAM98A     | 0.00324 | 0.37517 | 0.072 | 0.16 | 1 MS.Trt_vs_MS.NoTrt_F |
| CTD-2116N1 | 0.00324 | -0.4207 | 0.047 | 0.12 | 1 MS.Trt_vs_MS.NoTrt_F |
| C10orf76   | 0.00324 | -0.4974 | 0.331 | 0.47 | 1 MS.Trt_vs_MS.NoTrt_F |
| RP11-619A1 | 0.00325 | -0.4157 | 0.565 | 0.7  | 1 MS.Trt_vs_MS.NoTrt_F |
| LZTS2      | 0.00326 | -0.6518 | 0.058 | 0.14 | 1 MS.Trt_vs_MS.NoTrt_F |
| EIF3C      | 0.00327 | -0.3336 | 0.748 | 0.83 | 1 MS.Trt_vs_MS.NoTrt_F |
| SLC25A25   | 0.00329 | 0.26691 | 0.108 | 0.21 | 1 MS.Trt_vs_MS.NoTrt_F |
| SART1      | 0.0033  | -1.2669 | 0.288 | 0.42 | 1 MS.Trt_vs_MS.NoTrt_F |
| TTLL12     | 0.00331 | -0.7772 | 0.065 | 0.15 | 1 MS.Trt_vs_MS.NoTrt_F |
| FAM8A1     | 0.00331 | 0.34721 | 0.061 | 0.14 | 1 MS.Trt_vs_MS.NoTrt_F |
| TGFB111    | 0.00331 | 0.53048 | 0.245 | 0.38 | 1 MS.Trt_vs_MS.NoTrt_F |
| LSM1       | 0.00334 | 0.26942 | 0.133 | 0.25 | 1 MS.Trt_vs_MS.NoTrt_F |
| DEK        | 0.00336 | 0.36797 | 0.41  | 0.55 | 1 MS.Trt_vs_MS.NoTrt_F |
| INPPL1     | 0.00338 | 0.66991 | 0.09  | 0.19 | 1 MS.Trt_vs_MS.NoTrt_F |
| USPL1      | 0.00338 | 0.53422 | 0.108 | 0.21 | 1 MS.Trt_vs_MS.NoTrt_F |
| ZDHHC18    | 0.00339 | -0.3082 | 0.101 | 0.2  | 1 MS.Trt_vs_MS.NoTrt_F |
| FCHO1      | 0.0034  | -1.2734 | 0.73  | 0.82 | 1 MS.Trt_vs_MS.NoTrt_F |
| TAF10      | 0.0034  | -0.6501 | 0.101 | 0.2  | 1 MS.Trt_vs_MS.NoTrt_F |
| KLC4       | 0.00341 | -0.2779 | 0.795 | 0.86 | 1 MS.Trt_vs_MS.NoTrt_F |
| NUTM2B     | 0.00342 | -0.4166 | 0.065 | 0.15 | 1 MS.Trt_vs_MS.NoTrt_F |
| ZNF224     | 0.00346 | -0.8051 | 0.45  | 0.56 | 1 MS.Trt_vs_MS.NoTrt_F |
| CREBL2     | 0.00348 | -0.4668 | 0.112 | 0.21 | 1 MS.Trt_vs_MS.NoTrt_F |
| TMEM258    | 0.00348 | 0.58709 | 0.309 | 0.45 | 1 MS.Trt_vs_MS.NoTrt_F |
| DIDO1      | 0.0035  | 0.30603 | 0.201 | 0.34 | 1 MS.Trt_vs_MS.NoTrt_F |

|            |         |         |       |      |                        |
|------------|---------|---------|-------|------|------------------------|
| BEX4       | 0.0035  | 0.33623 | 0.122 | 0.24 | 1 MS.Trt_vs_MS.NoTrt_F |
| TCEAL3     | 0.00351 | -0.3413 | 0.133 | 0.24 | 1 MS.Trt_vs_MS.NoTrt_F |
| ARL15      | 0.00354 | 0.47588 | 0.083 | 0.18 | 1 MS.Trt_vs_MS.NoTrt_F |
| NET1       | 0.00355 | -0.4668 | 0.104 | 0.2  | 1 MS.Trt_vs_MS.NoTrt_F |
| PLD2       | 0.00356 | -0.503  | 0.09  | 0.18 | 1 MS.Trt_vs_MS.NoTrt_F |
| PIM3       | 0.00356 | -0.3504 | 0.129 | 0.24 | 1 MS.Trt_vs_MS.NoTrt_F |
| TBC1D22B   | 0.00356 | -0.8381 | 0.09  | 0.18 | 1 MS.Trt_vs_MS.NoTrt_F |
| TOR2A      | 0.00357 | 0.48698 | 0.101 | 0.2  | 1 MS.Trt_vs_MS.NoTrt_F |
| UBE2B      | 0.00358 | 0.29944 | 0.676 | 0.79 | 1 MS.Trt_vs_MS.NoTrt_F |
| SEC23B     | 0.0036  | -0.4197 | 0.147 | 0.26 | 1 MS.Trt_vs_MS.NoTrt_F |
| ESD        | 0.0036  | 0.36067 | 0.151 | 0.27 | 1 MS.Trt_vs_MS.NoTrt_F |
| DNAJC8     | 0.00361 | 0.278   | 0.266 | 0.43 | 1 MS.Trt_vs_MS.NoTrt_F |
| ZNF92      | 0.00361 | -0.9751 | 0.126 | 0.23 | 1 MS.Trt_vs_MS.NoTrt_F |
| DAGLB      | 0.00361 | -0.3525 | 0.741 | 0.88 | 1 MS.Trt_vs_MS.NoTrt_F |
| TLK2       | 0.00361 | -0.4096 | 0.345 | 0.49 | 1 MS.Trt_vs_MS.NoTrt_F |
| RP11-49K24 | 0.00363 | -0.4736 | 0.147 | 0.27 | 1 MS.Trt_vs_MS.NoTrt_F |
| PIK3R1     | 0.00364 | -0.4046 | 0.327 | 0.45 | 1 MS.Trt_vs_MS.NoTrt_F |
| WDR44      | 0.00364 | -0.5433 | 0.119 | 0.22 | 1 MS.Trt_vs_MS.NoTrt_F |
| THAP2      | 0.00365 | -0.4626 | 0.104 | 0.2  | 1 MS.Trt_vs_MS.NoTrt_F |
| PSMC1      | 0.00368 | -0.3415 | 0.342 | 0.46 | 1 MS.Trt_vs_MS.NoTrt_F |
| IMPA1      | 0.00368 | 0.58343 | 0.338 | 0.48 | 1 MS.Trt_vs_MS.NoTrt_F |
| LAMTOR1    | 0.0037  | 0.45802 | 0.219 | 0.37 | 1 MS.Trt_vs_MS.NoTrt_F |
| RP3-461F17 | 0.00371 | 0.25499 | 0.194 | 0.32 | 1 MS.Trt_vs_MS.NoTrt_F |
| PPM1A      | 0.00371 | -0.4171 | 0.183 | 0.31 | 1 MS.Trt_vs_MS.NoTrt_F |
| PLEKHM3    | 0.00373 | -0.7622 | 0.478 | 0.62 | 1 MS.Trt_vs_MS.NoTrt_F |
| PRPS2      | 0.00373 | -0.6151 | 0.126 | 0.23 | 1 MS.Trt_vs_MS.NoTrt_F |
| CIC        | 0.00375 | -0.4054 | 0.079 | 0.17 | 1 MS.Trt_vs_MS.NoTrt_F |
| DUS1L      | 0.00376 | 1.09009 | 0.086 | 0.18 | 1 MS.Trt_vs_MS.NoTrt_F |
| ATP2C1     | 0.00377 | -0.6482 | 0.183 | 0.3  | 1 MS.Trt_vs_MS.NoTrt_F |
| RYK        | 0.00377 | -0.623  | 0.083 | 0.17 | 1 MS.Trt_vs_MS.NoTrt_F |
| ATG9A      | 0.00377 | -0.3588 | 0.097 | 0.19 | 1 MS.Trt_vs_MS.NoTrt_F |
| RPS6KC1    | 0.00378 | -0.68   | 0.097 | 0.19 | 1 MS.Trt_vs_MS.NoTrt_F |
| MLEC       | 0.0038  | -0.3419 | 0.101 | 0.2  | 1 MS.Trt_vs_MS.NoTrt_F |
| CMIP       | 0.0038  | -1.0963 | 0.09  | 0.18 | 1 MS.Trt_vs_MS.NoTrt_F |
| PRDM8      | 0.00381 | -0.5484 | 0.086 | 0.18 | 1 MS.Trt_vs_MS.NoTrt_F |
| RRS1       | 0.00381 | -0.519  | 0.108 | 0.21 | 1 MS.Trt_vs_MS.NoTrt_F |
| ADAM8      | 0.00382 | 0.26937 | 0.201 | 0.34 | 1 MS.Trt_vs_MS.NoTrt_F |
| NLE1       | 0.00385 | -1.0076 | 0.223 | 0.35 | 1 MS.Trt_vs_MS.NoTrt_F |
| CUL4A      | 0.00386 | -0.3837 | 0.759 | 0.83 | 1 MS.Trt_vs_MS.NoTrt_F |
| MT1F       | 0.00386 | 0.3705  | 0.108 | 0.21 | 1 MS.Trt_vs_MS.NoTrt_F |

|          |         |         |       |      |   |                      |
|----------|---------|---------|-------|------|---|----------------------|
| TNFAIP1  | 0.00387 | -0.547  | 0.086 | 0.18 | 1 | MS.Trt_vs_MS.NoTrt_F |
| PSD3     | 0.00387 | -0.5998 | 0.306 | 0.45 | 1 | MS.Trt_vs_MS.NoTrt_F |
| NBPF3    | 0.00387 | 0.96172 | 0.403 | 0.54 | 1 | MS.Trt_vs_MS.NoTrt_F |
| ZRANB1   | 0.00387 | -0.3666 | 0.122 | 0.22 | 1 | MS.Trt_vs_MS.NoTrt_F |
| FAM196B  | 0.00388 | -0.5295 | 0.086 | 0.18 | 1 | MS.Trt_vs_MS.NoTrt_F |
| SLC25A37 | 0.00388 | 0.62514 | 0.622 | 0.8  | 1 | MS.Trt_vs_MS.NoTrt_F |
| C6orf223 | 0.00388 | -0.362  | 0.219 | 0.34 | 1 | MS.Trt_vs_MS.NoTrt_F |
| SEMA4B   | 0.00389 | -0.6403 | 0.349 | 0.48 | 1 | MS.Trt_vs_MS.NoTrt_F |
| CAPG     | 0.0039  | -0.3483 | 0.144 | 0.25 | 1 | MS.Trt_vs_MS.NoTrt_F |
| POLE4    | 0.00392 | -0.5307 | 0.112 | 0.21 | 1 | MS.Trt_vs_MS.NoTrt_F |
| METTL10  | 0.00392 | 0.30961 | 0.324 | 0.46 | 1 | MS.Trt_vs_MS.NoTrt_F |
| CAPRN2   | 0.00392 | -1.2165 | 0.673 | 0.8  | 1 | MS.Trt_vs_MS.NoTrt_F |
| DCAF4    | 0.00394 | 0.46598 | 0.536 | 0.66 | 1 | MS.Trt_vs_MS.NoTrt_F |
| RBM27    | 0.00395 | -0.4295 | 0.133 | 0.24 | 1 | MS.Trt_vs_MS.NoTrt_F |
| ZNF44    | 0.00395 | 0.39606 | 0.579 | 0.69 | 1 | MS.Trt_vs_MS.NoTrt_F |
| EVI2A    | 0.00396 | 0.60927 | 0.191 | 0.33 | 1 | MS.Trt_vs_MS.NoTrt_F |
| HPS3     | 0.00397 | 0.38062 | 0.241 | 0.37 | 1 | MS.Trt_vs_MS.NoTrt_F |
| SDHD     | 0.00398 | -0.4118 | 0.633 | 0.75 | 1 | MS.Trt_vs_MS.NoTrt_F |
| TNFRSF4  | 0.00398 | 0.52142 | 0.165 | 0.29 | 1 | MS.Trt_vs_MS.NoTrt_F |
| ASNA1    | 0.00399 | -0.327  | 0.086 | 0.18 | 1 | MS.Trt_vs_MS.NoTrt_F |
| HOXB3    | 0.00401 | -0.3121 | 0.065 | 0.14 | 1 | MS.Trt_vs_MS.NoTrt_F |
| TRIM23   | 0.00401 | -1.555  | 0.079 | 0.17 | 1 | MS.Trt_vs_MS.NoTrt_F |
| C8orf44  | 0.00402 | -0.6029 | 0.439 | 0.58 | 1 | MS.Trt_vs_MS.NoTrt_F |
| RCL1     | 0.00403 | 0.39182 | 0.396 | 0.52 | 1 | MS.Trt_vs_MS.NoTrt_F |
| VPS52    | 0.00404 | -0.4973 | 0.158 | 0.27 | 1 | MS.Trt_vs_MS.NoTrt_F |
| SNX10    | 0.00405 | 0.65226 | 0.133 | 0.24 | 1 | MS.Trt_vs_MS.NoTrt_F |
| RAB37    | 0.00406 | -0.442  | 0.32  | 0.46 | 1 | MS.Trt_vs_MS.NoTrt_F |
| HIGD2A   | 0.00408 | 0.44408 | 0.288 | 0.46 | 1 | MS.Trt_vs_MS.NoTrt_F |
| GRB2     | 0.0041  | 0.36806 | 0.647 | 0.79 | 1 | MS.Trt_vs_MS.NoTrt_F |
| FIS1     | 0.0041  | 0.29286 | 0.259 | 0.41 | 1 | MS.Trt_vs_MS.NoTrt_F |
| TRPT1    | 0.0041  | -0.4605 | 0.115 | 0.22 | 1 | MS.Trt_vs_MS.NoTrt_F |
| CYCS     | 0.00414 | -0.6067 | 0.741 | 0.81 | 1 | MS.Trt_vs_MS.NoTrt_F |
| ERMARD   | 0.00414 | -0.292  | 0.104 | 0.2  | 1 | MS.Trt_vs_MS.NoTrt_F |
| ADORA2A  | 0.00415 | -0.2557 | 0.151 | 0.27 | 1 | MS.Trt_vs_MS.NoTrt_F |
| MED28    | 0.00416 | -0.8852 | 0.867 | 0.92 | 1 | MS.Trt_vs_MS.NoTrt_F |
| YKT6     | 0.00417 | 0.25601 | 0.115 | 0.22 | 1 | MS.Trt_vs_MS.NoTrt_F |
| KLF12    | 0.00417 | -0.3948 | 0.353 | 0.5  | 1 | MS.Trt_vs_MS.NoTrt_F |
| SLC9A1   | 0.00417 | 0.94512 | 0.187 | 0.32 | 1 | MS.Trt_vs_MS.NoTrt_F |
| MAN1C1   | 0.00418 | 0.63112 | 0.899 | 0.85 | 1 | MS.Trt_vs_MS.NoTrt_F |
| ZFYVE19  | 0.00418 | -0.6919 | 0.108 | 0.2  | 1 | MS.Trt_vs_MS.NoTrt_F |

|         |         |         |       |      |                        |
|---------|---------|---------|-------|------|------------------------|
| FRG2C   | 0.00418 | -0.3016 | 0.169 | 0.29 | 1 MS.Trt_vs_MS.NoTrt_F |
| SOCS1   | 0.00419 | -0.2649 | 0.094 | 0.19 | 1 MS.Trt_vs_MS.NoTrt_F |
| ADARB1  | 0.00419 | -0.9446 | 0.209 | 0.34 | 1 MS.Trt_vs_MS.NoTrt_F |
| XPR1    | 0.00419 | 0.30261 | 0.302 | 0.45 | 1 MS.Trt_vs_MS.NoTrt_F |
| C6orf1  | 0.0042  | 0.28327 | 0.133 | 0.25 | 1 MS.Trt_vs_MS.NoTrt_F |
| PAPD7   | 0.00421 | -1.4353 | 0.097 | 0.19 | 1 MS.Trt_vs_MS.NoTrt_F |
| MECR    | 0.00421 | -0.7778 | 0.284 | 0.44 | 1 MS.Trt_vs_MS.NoTrt_F |
| PORCN   | 0.00421 | -1.0586 | 0.079 | 0.17 | 1 MS.Trt_vs_MS.NoTrt_F |
| LAMTOR3 | 0.00422 | 0.32121 | 0.356 | 0.53 | 1 MS.Trt_vs_MS.NoTrt_F |
| ICAM1   | 0.00424 | 0.26139 | 0.424 | 0.61 | 1 MS.Trt_vs_MS.NoTrt_F |
| RABEP2  | 0.00425 | -0.3942 | 0.518 | 0.63 | 1 MS.Trt_vs_MS.NoTrt_F |
| TAF1B   | 0.00425 | -0.3065 | 0.468 | 0.63 | 1 MS.Trt_vs_MS.NoTrt_F |
| HECA    | 0.00426 | 0.47034 | 0.496 | 0.65 | 1 MS.Trt_vs_MS.NoTrt_F |
| CASC3   | 0.00426 | -0.3904 | 0.529 | 0.65 | 1 MS.Trt_vs_MS.NoTrt_F |
| AKAP2   | 0.00427 | -0.3052 | 0.234 | 0.38 | 1 MS.Trt_vs_MS.NoTrt_F |
| IMPAD1  | 0.00427 | -0.312  | 0.475 | 0.62 | 1 MS.Trt_vs_MS.NoTrt_F |
| C3orf38 | 0.00429 | -1.2547 | 0.101 | 0.19 | 1 MS.Trt_vs_MS.NoTrt_F |
| CLCN7   | 0.00429 | -0.3796 | 0.263 | 0.4  | 1 MS.Trt_vs_MS.NoTrt_F |
| AAAS    | 0.0043  | -0.3282 | 0.119 | 0.22 | 1 MS.Trt_vs_MS.NoTrt_F |
| WDR5B   | 0.0043  | -1.9872 | 0.191 | 0.3  | 1 MS.Trt_vs_MS.NoTrt_F |
| DIAPH2  | 0.00431 | -0.5394 | 0.317 | 0.46 | 1 MS.Trt_vs_MS.NoTrt_F |
| DENND4C | 0.00431 | -0.2566 | 0.338 | 0.48 | 1 MS.Trt_vs_MS.NoTrt_F |
| 5-Mar   | 0.00432 | -0.3318 | 0.209 | 0.33 | 1 MS.Trt_vs_MS.NoTrt_F |
| RIC1    | 0.00432 | -0.3765 | 0.126 | 0.23 | 1 MS.Trt_vs_MS.NoTrt_F |
| CDK6    | 0.00432 | 0.46304 | 0.147 | 0.27 | 1 MS.Trt_vs_MS.NoTrt_F |
| ABT1    | 0.00434 | 0.34965 | 0.194 | 0.33 | 1 MS.Trt_vs_MS.NoTrt_F |
| SLC6A6  | 0.00435 | 0.48731 | 0.194 | 0.33 | 1 MS.Trt_vs_MS.NoTrt_F |
| MRRF    | 0.00435 | -0.9689 | 0.583 | 0.67 | 1 MS.Trt_vs_MS.NoTrt_F |
| CHPF2   | 0.00435 | -0.4101 | 0.115 | 0.22 | 1 MS.Trt_vs_MS.NoTrt_F |
| CPSF3   | 0.00435 | -0.6558 | 0.108 | 0.2  | 1 MS.Trt_vs_MS.NoTrt_F |
| RPGRIP1 | 0.00438 | 0.38378 | 0.248 | 0.38 | 1 MS.Trt_vs_MS.NoTrt_F |
| FAM46A  | 0.00438 | -0.3704 | 0.083 | 0.17 | 1 MS.Trt_vs_MS.NoTrt_F |
| REC8    | 0.00438 | -0.6153 | 0.112 | 0.21 | 1 MS.Trt_vs_MS.NoTrt_F |
| GAR1    | 0.00438 | -0.4605 | 0.068 | 0.15 | 1 MS.Trt_vs_MS.NoTrt_F |
| SUB1    | 0.00439 | 0.29926 | 0.554 | 0.74 | 1 MS.Trt_vs_MS.NoTrt_F |
| COA3    | 0.00441 | 0.28921 | 0.147 | 0.27 | 1 MS.Trt_vs_MS.NoTrt_F |
| AP1S1   | 0.00441 | -0.4326 | 0.076 | 0.16 | 1 MS.Trt_vs_MS.NoTrt_F |
| SPG20   | 0.00442 | -0.3711 | 0.112 | 0.21 | 1 MS.Trt_vs_MS.NoTrt_F |
| SLC25A1 | 0.0045  | 0.28339 | 0.097 | 0.19 | 1 MS.Trt_vs_MS.NoTrt_F |
| NPEPL1  | 0.00451 | 0.7314  | 0.147 | 0.27 | 1 MS.Trt_vs_MS.NoTrt_F |

|            |         |         |       |      |   |                      |
|------------|---------|---------|-------|------|---|----------------------|
| LMCD1      | 0.00452 | 1.03128 | 0.266 | 0.39 | 1 | MS.Trt_vs_MS.NoTrt_F |
| RP11-159D1 | 0.00452 | -0.3031 | 0.147 | 0.26 | 1 | MS.Trt_vs_MS.NoTrt_F |
| CPA5       | 0.00453 | -1.2044 | 0.054 | 0.13 | 1 | MS.Trt_vs_MS.NoTrt_F |
| KIAA1143   | 0.00453 | -0.8576 | 0.475 | 0.61 | 1 | MS.Trt_vs_MS.NoTrt_F |
| KCNC2      | 0.00454 | -0.2516 | 0.349 | 0.48 | 1 | MS.Trt_vs_MS.NoTrt_F |
| EZH2       | 0.00454 | -0.6758 | 0.133 | 0.24 | 1 | MS.Trt_vs_MS.NoTrt_F |
| KLHL42     | 0.00455 | -0.4751 | 0.115 | 0.21 | 1 | MS.Trt_vs_MS.NoTrt_F |
| FAR1       | 0.00456 | -0.6858 | 0.09  | 0.18 | 1 | MS.Trt_vs_MS.NoTrt_F |
| MCMBP      | 0.00458 | 0.48902 | 0.464 | 0.6  | 1 | MS.Trt_vs_MS.NoTrt_F |
| TRIM35     | 0.00459 | 0.30755 | 0.223 | 0.38 | 1 | MS.Trt_vs_MS.NoTrt_F |
| MON1A      | 0.00459 | -0.9595 | 0.083 | 0.17 | 1 | MS.Trt_vs_MS.NoTrt_F |
| GIMAP8     | 0.00461 | 0.5001  | 0.09  | 0.18 | 1 | MS.Trt_vs_MS.NoTrt_F |
| MRPL38     | 0.00462 | -0.2919 | 0.406 | 0.53 | 1 | MS.Trt_vs_MS.NoTrt_F |
| SECISBP2L  | 0.00465 | -0.2634 | 0.683 | 0.83 | 1 | MS.Trt_vs_MS.NoTrt_F |
| PRR4       | 0.00466 | 0.33659 | 0.259 | 0.4  | 1 | MS.Trt_vs_MS.NoTrt_F |
| SLC25A38   | 0.00467 | -0.6696 | 0.104 | 0.2  | 1 | MS.Trt_vs_MS.NoTrt_F |
| ODC1       | 0.00468 | 0.52659 | 0.101 | 0.2  | 1 | MS.Trt_vs_MS.NoTrt_F |
| SLC7A1     | 0.00468 | -0.8087 | 0.101 | 0.19 | 1 | MS.Trt_vs_MS.NoTrt_F |
| RASSF1     | 0.00469 | -0.2781 | 0.223 | 0.35 | 1 | MS.Trt_vs_MS.NoTrt_F |
| RITA1      | 0.0047  | -0.7143 | 0.061 | 0.14 | 1 | MS.Trt_vs_MS.NoTrt_F |
| TDRKH      | 0.0047  | -0.3195 | 0.086 | 0.18 | 1 | MS.Trt_vs_MS.NoTrt_F |
| WWP1       | 0.00472 | 0.29466 | 0.424 | 0.59 | 1 | MS.Trt_vs_MS.NoTrt_F |
| PRKAG1     | 0.00473 | 0.51102 | 0.525 | 0.68 | 1 | MS.Trt_vs_MS.NoTrt_F |
| PPP1R12C   | 0.00475 | -0.3627 | 0.076 | 0.16 | 1 | MS.Trt_vs_MS.NoTrt_F |
| FAM50B     | 0.00475 | -1.3568 | 0.061 | 0.14 | 1 | MS.Trt_vs_MS.NoTrt_F |
| SCN1A      | 0.00476 | -0.2752 | 0.342 | 0.48 | 1 | MS.Trt_vs_MS.NoTrt_F |
| CHTOP      | 0.00476 | 0.31842 | 0.55  | 0.7  | 1 | MS.Trt_vs_MS.NoTrt_F |
| GRIP1      | 0.00476 | -0.507  | 0.061 | 0.14 | 1 | MS.Trt_vs_MS.NoTrt_F |
| CCDC65     | 0.00478 | -0.3406 | 0.083 | 0.17 | 1 | MS.Trt_vs_MS.NoTrt_F |
| RGPD1      | 0.00478 | -0.4906 | 0.223 | 0.35 | 1 | MS.Trt_vs_MS.NoTrt_F |
| CRIP1      | 0.00478 | 0.35446 | 0.432 | 0.64 | 1 | MS.Trt_vs_MS.NoTrt_F |
| CFAP36     | 0.00479 | -0.8438 | 0.392 | 0.5  | 1 | MS.Trt_vs_MS.NoTrt_F |
| KAT2B      | 0.0048  | 0.37517 | 0.237 | 0.39 | 1 | MS.Trt_vs_MS.NoTrt_F |
| ADAM17     | 0.00481 | -0.2836 | 0.076 | 0.16 | 1 | MS.Trt_vs_MS.NoTrt_F |
| GBP3       | 0.00481 | 0.27325 | 0.201 | 0.33 | 1 | MS.Trt_vs_MS.NoTrt_F |
| TRAPPC13   | 0.00481 | 0.46194 | 0.14  | 0.24 | 1 | MS.Trt_vs_MS.NoTrt_F |
| TET3       | 0.00483 | -0.6413 | 0.083 | 0.17 | 1 | MS.Trt_vs_MS.NoTrt_F |
| AP4B1      | 0.00484 | 0.36239 | 0.604 | 0.74 | 1 | MS.Trt_vs_MS.NoTrt_F |
| PDCD11     | 0.00484 | 0.58147 | 0.219 | 0.35 | 1 | MS.Trt_vs_MS.NoTrt_F |
| DDX11      | 0.00484 | -0.258  | 0.385 | 0.5  | 1 | MS.Trt_vs_MS.NoTrt_F |



|          |         |         |       |      |   |                      |
|----------|---------|---------|-------|------|---|----------------------|
| SNX2     | 0.00485 | -0.2953 | 0.633 | 0.74 | 1 | MS.Trt_vs_MS.NoTrt_F |
| ZNF770   | 0.00488 | -0.5107 | 0.291 | 0.41 | 1 | MS.Trt_vs_MS.NoTrt_F |
| LEMD2    | 0.00488 | -0.4884 | 0.094 | 0.19 | 1 | MS.Trt_vs_MS.NoTrt_F |
| SLC25A28 | 0.00488 | -0.8105 | 0.061 | 0.14 | 1 | MS.Trt_vs_MS.NoTrt_F |
| NAA20    | 0.00488 | 0.42713 | 0.133 | 0.24 | 1 | MS.Trt_vs_MS.NoTrt_F |
| C16orf58 | 0.00489 | 0.52286 | 0.14  | 0.25 | 1 | MS.Trt_vs_MS.NoTrt_F |
| DAPK3    | 0.0049  | -0.3049 | 0.112 | 0.21 | 1 | MS.Trt_vs_MS.NoTrt_F |
| ASB13    | 0.00491 | -1.6754 | 0.112 | 0.21 | 1 | MS.Trt_vs_MS.NoTrt_F |
| ZYG11B   | 0.00492 | -0.3787 | 0.687 | 0.82 | 1 | MS.Trt_vs_MS.NoTrt_F |
| GTF2H2C  | 0.00492 | 0.52116 | 0.342 | 0.49 | 1 | MS.Trt_vs_MS.NoTrt_F |
| WDR81    | 0.00494 | 0.62584 | 0.076 | 0.16 | 1 | MS.Trt_vs_MS.NoTrt_F |
| PHF12    | 0.00495 | -0.387  | 0.662 | 0.75 | 1 | MS.Trt_vs_MS.NoTrt_F |
| TAF5L    | 0.00495 | -0.7645 | 0.173 | 0.3  | 1 | MS.Trt_vs_MS.NoTrt_F |
| MFSD12   | 0.00497 | -0.4213 | 0.219 | 0.34 | 1 | MS.Trt_vs_MS.NoTrt_F |
| C1orf131 | 0.00497 | 0.86801 | 0.586 | 0.71 | 1 | MS.Trt_vs_MS.NoTrt_F |
| TCEB2    | 0.00498 | 0.64579 | 0.32  | 0.52 | 1 | MS.Trt_vs_MS.NoTrt_F |
| DDX31    | 0.005   | -0.9862 | 0.068 | 0.15 | 1 | MS.Trt_vs_MS.NoTrt_F |
| HBS1L    | 0.005   | 0.45766 | 0.522 | 0.68 | 1 | MS.Trt_vs_MS.NoTrt_F |
| MYO18A   | 0.00501 | -0.5371 | 0.514 | 0.65 | 1 | MS.Trt_vs_MS.NoTrt_F |
| LIPA     | 0.00502 | -0.572  | 0.284 | 0.41 | 1 | MS.Trt_vs_MS.NoTrt_F |
| C9orf69  | 0.00502 | -1.0173 | 0.054 | 0.13 | 1 | MS.Trt_vs_MS.NoTrt_F |
| GPRASP1  | 0.00503 | -0.7913 | 0.061 | 0.14 | 1 | MS.Trt_vs_MS.NoTrt_F |
| MATR3    | 0.00503 | -0.3613 | 0.932 | 0.96 | 1 | MS.Trt_vs_MS.NoTrt_F |
| C4orf33  | 0.00503 | 0.8848  | 0.079 | 0.17 | 1 | MS.Trt_vs_MS.NoTrt_F |
| UBXN7    | 0.00503 | -0.3767 | 0.777 | 0.88 | 1 | MS.Trt_vs_MS.NoTrt_F |
| HHLA3    | 0.00504 | -0.4798 | 0.302 | 0.43 | 1 | MS.Trt_vs_MS.NoTrt_F |
| ZNF446   | 0.00505 | -0.914  | 0.054 | 0.13 | 1 | MS.Trt_vs_MS.NoTrt_F |
| ZNF644   | 0.00506 | 0.38966 | 0.209 | 0.34 | 1 | MS.Trt_vs_MS.NoTrt_F |
| MARK2    | 0.00507 | -0.4798 | 0.173 | 0.29 | 1 | MS.Trt_vs_MS.NoTrt_F |
| DLG3     | 0.00507 | -1.0683 | 0.047 | 0.12 | 1 | MS.Trt_vs_MS.NoTrt_F |
| GPR34    | 0.00508 | -0.6162 | 0.068 | 0.15 | 1 | MS.Trt_vs_MS.NoTrt_F |
| ST3GAL1  | 0.00509 | -0.2991 | 0.234 | 0.34 | 1 | MS.Trt_vs_MS.NoTrt_F |
| ATP5E    | 0.00511 | 0.65283 | 0.417 | 0.67 | 1 | MS.Trt_vs_MS.NoTrt_F |
| C21orf91 | 0.00512 | 0.53481 | 0.18  | 0.3  | 1 | MS.Trt_vs_MS.NoTrt_F |
| RING1    | 0.00512 | 0.30983 | 0.079 | 0.17 | 1 | MS.Trt_vs_MS.NoTrt_F |
| CHML     | 0.00514 | 1.25672 | 0.209 | 0.34 | 1 | MS.Trt_vs_MS.NoTrt_F |
| DMAP1    | 0.00515 | -0.5633 | 0.432 | 0.55 | 1 | MS.Trt_vs_MS.NoTrt_F |
| C7orf25  | 0.00515 | -2.0323 | 0.04  | 0.11 | 1 | MS.Trt_vs_MS.NoTrt_F |
| TADA1    | 0.00516 | 0.32313 | 0.086 | 0.18 | 1 | MS.Trt_vs_MS.NoTrt_F |
| ARHGAP19 | 0.00518 | 0.41317 | 0.299 | 0.44 | 1 | MS.Trt_vs_MS.NoTrt_F |

|           |         |         |       |      |   |                      |
|-----------|---------|---------|-------|------|---|----------------------|
| ST8SIA4   | 0.00518 | -0.4626 | 0.737 | 0.81 | 1 | MS.Trt_vs_MS.NoTrt_F |
| RBM12     | 0.00518 | 0.26738 | 0.147 | 0.27 | 1 | MS.Trt_vs_MS.NoTrt_F |
| AFF4      | 0.00518 | -0.6844 | 0.482 | 0.61 | 1 | MS.Trt_vs_MS.NoTrt_F |
| TPP1      | 0.00519 | 0.45264 | 0.317 | 0.5  | 1 | MS.Trt_vs_MS.NoTrt_F |
| TRAFD1    | 0.00524 | -0.2929 | 0.227 | 0.35 | 1 | MS.Trt_vs_MS.NoTrt_F |
| OVCA2     | 0.00524 | 0.42589 | 0.101 | 0.2  | 1 | MS.Trt_vs_MS.NoTrt_F |
| RAB2B     | 0.00524 | -0.3764 | 0.637 | 0.74 | 1 | MS.Trt_vs_MS.NoTrt_F |
| GSK3B     | 0.00526 | -0.8361 | 0.683 | 0.81 | 1 | MS.Trt_vs_MS.NoTrt_F |
| GPR146    | 0.00526 | 0.33952 | 0.09  | 0.18 | 1 | MS.Trt_vs_MS.NoTrt_F |
| FBF1      | 0.00527 | 0.60712 | 0.058 | 0.13 | 1 | MS.Trt_vs_MS.NoTrt_F |
| HEMGN     | 0.00528 | -0.7456 | 0.104 | 0.2  | 1 | MS.Trt_vs_MS.NoTrt_F |
| STK17A    | 0.00528 | -0.3136 | 0.291 | 0.44 | 1 | MS.Trt_vs_MS.NoTrt_F |
| DHX33     | 0.0053  | 0.26885 | 0.349 | 0.49 | 1 | MS.Trt_vs_MS.NoTrt_F |
| IFT52     | 0.00531 | -0.3071 | 0.086 | 0.18 | 1 | MS.Trt_vs_MS.NoTrt_F |
| GABPA     | 0.00531 | -0.8383 | 0.108 | 0.2  | 1 | MS.Trt_vs_MS.NoTrt_F |
| ATP1B3    | 0.00532 | 0.32345 | 0.144 | 0.26 | 1 | MS.Trt_vs_MS.NoTrt_F |
| PRR7      | 0.00533 | -0.3432 | 0.05  | 0.12 | 1 | MS.Trt_vs_MS.NoTrt_F |
| PDHX      | 0.00534 | -0.2792 | 0.637 | 0.76 | 1 | MS.Trt_vs_MS.NoTrt_F |
| SNX29     | 0.00536 | -0.7403 | 0.781 | 0.86 | 1 | MS.Trt_vs_MS.NoTrt_F |
| GAB3      | 0.0054  | 0.7765  | 0.363 | 0.51 | 1 | MS.Trt_vs_MS.NoTrt_F |
| DNAH8     | 0.0054  | 0.88362 | 0.065 | 0.14 | 1 | MS.Trt_vs_MS.NoTrt_F |
| EIF2B3    | 0.00541 | -0.6144 | 0.424 | 0.53 | 1 | MS.Trt_vs_MS.NoTrt_F |
| CEACAM4   | 0.00541 | -0.3749 | 0.101 | 0.19 | 1 | MS.Trt_vs_MS.NoTrt_F |
| RPP25L    | 0.00541 | 0.45506 | 0.072 | 0.16 | 1 | MS.Trt_vs_MS.NoTrt_F |
| PLS3      | 0.00545 | 0.38427 | 0.353 | 0.52 | 1 | MS.Trt_vs_MS.NoTrt_F |
| EPC2      | 0.00547 | -0.6496 | 0.101 | 0.19 | 1 | MS.Trt_vs_MS.NoTrt_F |
| AASDH     | 0.00547 | 0.3254  | 0.094 | 0.19 | 1 | MS.Trt_vs_MS.NoTrt_F |
| RNF13     | 0.00548 | 0.52271 | 0.173 | 0.3  | 1 | MS.Trt_vs_MS.NoTrt_F |
| ADAL      | 0.00552 | -0.7735 | 0.421 | 0.58 | 1 | MS.Trt_vs_MS.NoTrt_F |
| KIAA1324L | 0.00553 | 0.52357 | 0.054 | 0.13 | 1 | MS.Trt_vs_MS.NoTrt_F |
| ARPC1A    | 0.00554 | 0.51129 | 0.245 | 0.38 | 1 | MS.Trt_vs_MS.NoTrt_F |
| GCHFR     | 0.00556 | 0.69776 | 0.09  | 0.18 | 1 | MS.Trt_vs_MS.NoTrt_F |
| LEMD3     | 0.00556 | -0.2835 | 0.594 | 0.74 | 1 | MS.Trt_vs_MS.NoTrt_F |
| COX7A2    | 0.00558 | 0.29256 | 0.705 | 0.8  | 1 | MS.Trt_vs_MS.NoTrt_F |
| DFNA5     | 0.00559 | -0.3485 | 0.119 | 0.22 | 1 | MS.Trt_vs_MS.NoTrt_F |
| ATP6V0B   | 0.00562 | 0.37231 | 0.187 | 0.32 | 1 | MS.Trt_vs_MS.NoTrt_F |
| C9orf131  | 0.00563 | -1.2394 | 0.126 | 0.22 | 1 | MS.Trt_vs_MS.NoTrt_F |
| NAA38     | 0.00563 | 0.55823 | 0.129 | 0.24 | 1 | MS.Trt_vs_MS.NoTrt_F |
| C2orf68   | 0.00564 | 0.69774 | 0.827 | 0.8  | 1 | MS.Trt_vs_MS.NoTrt_F |
| ADGRV1    | 0.00565 | -0.2575 | 0.183 | 0.3  | 1 | MS.Trt_vs_MS.NoTrt_F |

|            |         |         |       |      |   |                      |
|------------|---------|---------|-------|------|---|----------------------|
| HLA-DRB5   | 0.00567 | -1.1204 | 0.115 | 0.21 | 1 | MS.Trt_vs_MS.NoTrt_F |
| MGAT2      | 0.00568 | -0.5529 | 0.126 | 0.23 | 1 | MS.Trt_vs_MS.NoTrt_F |
| RAB40C     | 0.00568 | -1.0094 | 0.043 | 0.11 | 1 | MS.Trt_vs_MS.NoTrt_F |
| DDB1       | 0.0057  | -0.2736 | 0.881 | 0.88 | 1 | MS.Trt_vs_MS.NoTrt_F |
| INTS10     | 0.00573 | -0.2921 | 0.543 | 0.69 | 1 | MS.Trt_vs_MS.NoTrt_F |
| CTD-2369P2 | 0.00573 | 0.94027 | 0.076 | 0.16 | 1 | MS.Trt_vs_MS.NoTrt_F |
| ZNF146     | 0.00573 | 0.35756 | 0.194 | 0.32 | 1 | MS.Trt_vs_MS.NoTrt_F |
| RAI1       | 0.00574 | -0.6545 | 0.176 | 0.29 | 1 | MS.Trt_vs_MS.NoTrt_F |
| PEMT       | 0.00576 | 0.69877 | 0.072 | 0.16 | 1 | MS.Trt_vs_MS.NoTrt_F |
| PGM3       | 0.00577 | 1.02161 | 0.23  | 0.37 | 1 | MS.Trt_vs_MS.NoTrt_F |
| COG4       | 0.00577 | -0.4312 | 0.68  | 0.79 | 1 | MS.Trt_vs_MS.NoTrt_F |
| FAM134C    | 0.00577 | -0.3024 | 0.629 | 0.74 | 1 | MS.Trt_vs_MS.NoTrt_F |
| NCOR2      | 0.00582 | 0.27901 | 0.363 | 0.5  | 1 | MS.Trt_vs_MS.NoTrt_F |
| PPIF       | 0.00588 | -0.6984 | 0.094 | 0.18 | 1 | MS.Trt_vs_MS.NoTrt_F |
| MPG        | 0.00589 | 0.25714 | 0.173 | 0.3  | 1 | MS.Trt_vs_MS.NoTrt_F |
| GLB1       | 0.0059  | -0.6687 | 0.248 | 0.37 | 1 | MS.Trt_vs_MS.NoTrt_F |
| WDR45B     | 0.0059  | -0.3624 | 0.381 | 0.53 | 1 | MS.Trt_vs_MS.NoTrt_F |
| SPECC1L    | 0.00593 | 0.27609 | 0.122 | 0.23 | 1 | MS.Trt_vs_MS.NoTrt_F |
| FBXO41     | 0.00594 | 0.33106 | 0.061 | 0.14 | 1 | MS.Trt_vs_MS.NoTrt_F |
| SMIM4      | 0.00598 | -0.8831 | 0.079 | 0.16 | 1 | MS.Trt_vs_MS.NoTrt_F |
| COX6B1     | 0.00599 | 0.27956 | 0.18  | 0.29 | 1 | MS.Trt_vs_MS.NoTrt_F |
| ORC3       | 0.00599 | 0.849   | 0.165 | 0.28 | 1 | MS.Trt_vs_MS.NoTrt_F |
| S1PR3      | 0.00601 | 0.33909 | 0.802 | 0.71 | 1 | MS.Trt_vs_MS.NoTrt_F |
| PER3       | 0.00602 | -1.4539 | 0.086 | 0.17 | 1 | MS.Trt_vs_MS.NoTrt_F |
| RHBDD2     | 0.00604 | -0.3427 | 0.241 | 0.37 | 1 | MS.Trt_vs_MS.NoTrt_F |
| FAM210B    | 0.00604 | -1.2441 | 0.338 | 0.46 | 1 | MS.Trt_vs_MS.NoTrt_F |
| HIST2H4A   | 0.00605 | -0.5052 | 0.094 | 0.18 | 1 | MS.Trt_vs_MS.NoTrt_F |
| SAT2       | 0.00605 | -0.3261 | 0.122 | 0.22 | 1 | MS.Trt_vs_MS.NoTrt_F |
| TMEM254    | 0.00608 | -0.5406 | 0.112 | 0.21 | 1 | MS.Trt_vs_MS.NoTrt_F |
| FKBP10     | 0.00608 | -0.4151 | 0.349 | 0.5  | 1 | MS.Trt_vs_MS.NoTrt_F |
| TRMT44     | 0.00609 | -0.5698 | 0.23  | 0.37 | 1 | MS.Trt_vs_MS.NoTrt_F |
| DSN1       | 0.00609 | -0.6251 | 0.219 | 0.34 | 1 | MS.Trt_vs_MS.NoTrt_F |
| MRPL41     | 0.00611 | 0.34617 | 0.176 | 0.3  | 1 | MS.Trt_vs_MS.NoTrt_F |
| SIRT1      | 0.00611 | 0.34125 | 0.137 | 0.24 | 1 | MS.Trt_vs_MS.NoTrt_F |
| EMC7       | 0.00611 | 0.26273 | 0.205 | 0.34 | 1 | MS.Trt_vs_MS.NoTrt_F |
| DNASE1L3   | 0.00612 | -0.2768 | 0.338 | 0.5  | 1 | MS.Trt_vs_MS.NoTrt_F |
| KDM4B      | 0.00613 | -0.8109 | 0.59  | 0.71 | 1 | MS.Trt_vs_MS.NoTrt_F |
| AIMP2      | 0.00614 | -0.5495 | 0.288 | 0.42 | 1 | MS.Trt_vs_MS.NoTrt_F |
| SUV39H2    | 0.00619 | -0.5528 | 0.399 | 0.56 | 1 | MS.Trt_vs_MS.NoTrt_F |
| TFG        | 0.00622 | 0.25524 | 0.133 | 0.24 | 1 | MS.Trt_vs_MS.NoTrt_F |

|          |         |         |       |      |   |                      |
|----------|---------|---------|-------|------|---|----------------------|
| COMTD1   | 0.00622 | 0.69049 | 0.112 | 0.21 | 1 | MS.Trt_vs_MS.NoTrt_F |
| DGCR8    | 0.00625 | -0.2805 | 0.137 | 0.25 | 1 | MS.Trt_vs_MS.NoTrt_F |
| LARP7    | 0.00626 | 0.53989 | 0.201 | 0.32 | 1 | MS.Trt_vs_MS.NoTrt_F |
| MYD88    | 0.00627 | -0.6176 | 0.144 | 0.25 | 1 | MS.Trt_vs_MS.NoTrt_F |
| EID1     | 0.00627 | 0.2557  | 0.381 | 0.56 | 1 | MS.Trt_vs_MS.NoTrt_F |
| PPP1R16B | 0.0063  | 0.81886 | 0.291 | 0.43 | 1 | MS.Trt_vs_MS.NoTrt_F |
| ZNF672   | 0.00632 | 0.98172 | 0.234 | 0.35 | 1 | MS.Trt_vs_MS.NoTrt_F |
| FBXO32   | 0.00634 | 0.40178 | 0.165 | 0.28 | 1 | MS.Trt_vs_MS.NoTrt_F |
| TMEM156  | 0.00634 | -0.5229 | 0.781 | 0.9  | 1 | MS.Trt_vs_MS.NoTrt_F |
| HPCAL4   | 0.00634 | -0.5991 | 0.083 | 0.17 | 1 | MS.Trt_vs_MS.NoTrt_F |
| RAB8B    | 0.00634 | -0.2623 | 0.266 | 0.39 | 1 | MS.Trt_vs_MS.NoTrt_F |
| CCDC94   | 0.00635 | -0.6946 | 0.14  | 0.24 | 1 | MS.Trt_vs_MS.NoTrt_F |
| QDPR     | 0.00636 | 0.33008 | 0.076 | 0.16 | 1 | MS.Trt_vs_MS.NoTrt_F |
| KRIT1    | 0.00636 | -0.8838 | 0.597 | 0.73 | 1 | MS.Trt_vs_MS.NoTrt_F |
| ARL3     | 0.0064  | 0.30389 | 0.094 | 0.18 | 1 | MS.Trt_vs_MS.NoTrt_F |
| IMMP1L   | 0.00641 | 0.92871 | 0.561 | 0.69 | 1 | MS.Trt_vs_MS.NoTrt_F |
| CHMP4A   | 0.00642 | 0.37852 | 0.572 | 0.75 | 1 | MS.Trt_vs_MS.NoTrt_F |
| OAS1     | 0.00642 | -0.5803 | 0.507 | 0.58 | 1 | MS.Trt_vs_MS.NoTrt_F |
| PYCR2    | 0.00643 | -0.2508 | 0.662 | 0.78 | 1 | MS.Trt_vs_MS.NoTrt_F |
| APIP     | 0.00643 | 0.61977 | 0.482 | 0.61 | 1 | MS.Trt_vs_MS.NoTrt_F |
| YEATS4   | 0.00646 | 0.25127 | 0.191 | 0.3  | 1 | MS.Trt_vs_MS.NoTrt_F |
| TACO1    | 0.00646 | -1.3595 | 0.385 | 0.48 | 1 | MS.Trt_vs_MS.NoTrt_F |
| HSPB9    | 0.00648 | -0.4366 | 0.187 | 0.3  | 1 | MS.Trt_vs_MS.NoTrt_F |
| ZNF420   | 0.00651 | 0.38672 | 0.104 | 0.2  | 1 | MS.Trt_vs_MS.NoTrt_F |
| ASNS     | 0.00652 | -0.519  | 0.281 | 0.4  | 1 | MS.Trt_vs_MS.NoTrt_F |
| SLC13A4  | 0.00653 | -0.6863 | 0.349 | 0.46 | 1 | MS.Trt_vs_MS.NoTrt_F |
| ASB6     | 0.00654 | -0.5892 | 0.586 | 0.69 | 1 | MS.Trt_vs_MS.NoTrt_F |
| SEMA3C   | 0.00655 | -0.3847 | 0.673 | 0.81 | 1 | MS.Trt_vs_MS.NoTrt_F |
| ZNF543   | 0.00656 | 0.89994 | 0.532 | 0.69 | 1 | MS.Trt_vs_MS.NoTrt_F |
| TSPYL4   | 0.00657 | 0.43248 | 0.108 | 0.21 | 1 | MS.Trt_vs_MS.NoTrt_F |
| TPM4     | 0.00658 | -0.3387 | 0.917 | 0.95 | 1 | MS.Trt_vs_MS.NoTrt_F |
| NAXE     | 0.00658 | 0.92907 | 0.133 | 0.24 | 1 | MS.Trt_vs_MS.NoTrt_F |
| LARS     | 0.0066  | 0.50947 | 0.691 | 0.79 | 1 | MS.Trt_vs_MS.NoTrt_F |
| EPC1     | 0.00661 | -0.3717 | 0.716 | 0.82 | 1 | MS.Trt_vs_MS.NoTrt_F |
| POP4     | 0.00662 | 0.44221 | 0.129 | 0.24 | 1 | MS.Trt_vs_MS.NoTrt_F |
| ZNF337   | 0.00663 | -0.5966 | 0.097 | 0.19 | 1 | MS.Trt_vs_MS.NoTrt_F |
| ANAPC13  | 0.00663 | 0.51733 | 0.112 | 0.21 | 1 | MS.Trt_vs_MS.NoTrt_F |
| CCNT1    | 0.00663 | 0.73278 | 0.165 | 0.29 | 1 | MS.Trt_vs_MS.NoTrt_F |
| EPHA4    | 0.00665 | -0.6096 | 0.212 | 0.34 | 1 | MS.Trt_vs_MS.NoTrt_F |
| SDHAF1   | 0.00665 | 0.41477 | 0.083 | 0.17 | 1 | MS.Trt_vs_MS.NoTrt_F |

|         |         |         |       |      |                        |
|---------|---------|---------|-------|------|------------------------|
| BEST1   | 0.00668 | -0.2507 | 0.806 | 0.91 | 1 MS.Trt_vs_MS.NoTrt_F |
| TRAPPC9 | 0.00668 | 0.89392 | 0.144 | 0.25 | 1 MS.Trt_vs_MS.NoTrt_F |
| PCBD1   | 0.00668 | -0.5579 | 0.108 | 0.2  | 1 MS.Trt_vs_MS.NoTrt_F |
| AP3D1   | 0.00669 | 0.27075 | 0.155 | 0.27 | 1 MS.Trt_vs_MS.NoTrt_F |
| PTPN9   | 0.0067  | 0.47501 | 0.273 | 0.39 | 1 MS.Trt_vs_MS.NoTrt_F |
| LYPLAL1 | 0.0067  | -0.5297 | 0.083 | 0.17 | 1 MS.Trt_vs_MS.NoTrt_F |
| NTMT1   | 0.00674 | -0.2552 | 0.212 | 0.31 | 1 MS.Trt_vs_MS.NoTrt_F |
| PCMT1   | 0.00676 | -0.2871 | 0.212 | 0.32 | 1 MS.Trt_vs_MS.NoTrt_F |
| DNAJC2  | 0.00676 | -0.3748 | 0.752 | 0.82 | 1 MS.Trt_vs_MS.NoTrt_F |
| AGAP4   | 0.00677 | 0.46367 | 0.209 | 0.34 | 1 MS.Trt_vs_MS.NoTrt_F |
| IARS    | 0.00677 | 0.25694 | 0.683 | 0.79 | 1 MS.Trt_vs_MS.NoTrt_F |
| WBP1    | 0.0068  | -0.3729 | 0.108 | 0.2  | 1 MS.Trt_vs_MS.NoTrt_F |
| BCORL1  | 0.00681 | -0.5537 | 0.083 | 0.17 | 1 MS.Trt_vs_MS.NoTrt_F |
| ALG1    | 0.00684 | -0.2758 | 0.558 | 0.66 | 1 MS.Trt_vs_MS.NoTrt_F |
| TFAM    | 0.00684 | 0.5512  | 0.255 | 0.39 | 1 MS.Trt_vs_MS.NoTrt_F |
| FUK     | 0.00685 | -0.5911 | 0.532 | 0.65 | 1 MS.Trt_vs_MS.NoTrt_F |
| SP1     | 0.00685 | 0.25327 | 0.169 | 0.29 | 1 MS.Trt_vs_MS.NoTrt_F |
| ZNF280B | 0.00688 | 0.3439  | 0.108 | 0.2  | 1 MS.Trt_vs_MS.NoTrt_F |
| DCUN1D4 | 0.00689 | 0.30688 | 0.288 | 0.43 | 1 MS.Trt_vs_MS.NoTrt_F |
| FUT10   | 0.00693 | 0.32601 | 0.313 | 0.44 | 1 MS.Trt_vs_MS.NoTrt_F |
| TRIM62  | 0.00694 | -1.2868 | 0.086 | 0.17 | 1 MS.Trt_vs_MS.NoTrt_F |
| PYCARD  | 0.00695 | 0.60742 | 0.133 | 0.24 | 1 MS.Trt_vs_MS.NoTrt_F |
| IMMP2L  | 0.00697 | -1.0602 | 0.101 | 0.19 | 1 MS.Trt_vs_MS.NoTrt_F |
| YIF1A   | 0.00697 | 0.36316 | 0.104 | 0.2  | 1 MS.Trt_vs_MS.NoTrt_F |
| UBFD1   | 0.00697 | -0.3708 | 0.363 | 0.54 | 1 MS.Trt_vs_MS.NoTrt_F |
| RAD50   | 0.00698 | 0.2888  | 0.198 | 0.32 | 1 MS.Trt_vs_MS.NoTrt_F |
| CENPF   | 0.00701 | -0.3716 | 0.324 | 0.49 | 1 MS.Trt_vs_MS.NoTrt_F |
| MRPL14  | 0.00704 | 0.8691  | 0.115 | 0.22 | 1 MS.Trt_vs_MS.NoTrt_F |
| NUDT6   | 0.00706 | -1.1084 | 0.507 | 0.61 | 1 MS.Trt_vs_MS.NoTrt_F |
| GRHL1   | 0.00709 | -0.5227 | 0.471 | 0.59 | 1 MS.Trt_vs_MS.NoTrt_F |
| HBG2    | 0.00709 | -0.2929 | 0.406 | 0.55 | 1 MS.Trt_vs_MS.NoTrt_F |
| MRPL36  | 0.00709 | 0.97038 | 0.115 | 0.22 | 1 MS.Trt_vs_MS.NoTrt_F |
| HNRNPH2 | 0.00711 | 0.25057 | 0.219 | 0.34 | 1 MS.Trt_vs_MS.NoTrt_F |
| ORAOV1  | 0.00713 | 0.44568 | 0.633 | 0.75 | 1 MS.Trt_vs_MS.NoTrt_F |
| CISD3   | 0.00716 | 0.38274 | 0.097 | 0.19 | 1 MS.Trt_vs_MS.NoTrt_F |
| EMC6    | 0.00717 | 0.67227 | 0.086 | 0.17 | 1 MS.Trt_vs_MS.NoTrt_F |
| HS2ST1  | 0.00718 | -0.7797 | 0.097 | 0.18 | 1 MS.Trt_vs_MS.NoTrt_F |
| CEP290  | 0.0072  | 0.38241 | 0.112 | 0.21 | 1 MS.Trt_vs_MS.NoTrt_F |
| AKT2    | 0.0072  | -0.3869 | 0.953 | 0.96 | 1 MS.Trt_vs_MS.NoTrt_F |
| RGS2    | 0.00724 | 0.88419 | 0.137 | 0.24 | 1 MS.Trt_vs_MS.NoTrt_F |

|          |         |         |       |      |                        |
|----------|---------|---------|-------|------|------------------------|
| CXCR3    | 0.00725 | -0.3407 | 0.183 | 0.3  | 1 MS.Trt_vs_MS.NoTrt_F |
| BACH2    | 0.00726 | -0.3557 | 0.155 | 0.26 | 1 MS.Trt_vs_MS.NoTrt_F |
| EBLN2    | 0.00726 | -0.7892 | 0.104 | 0.19 | 1 MS.Trt_vs_MS.NoTrt_F |
| UBE2G1   | 0.00729 | -0.4389 | 0.219 | 0.34 | 1 MS.Trt_vs_MS.NoTrt_F |
| TELO2    | 0.00733 | 0.68991 | 0.115 | 0.22 | 1 MS.Trt_vs_MS.NoTrt_F |
| VAMP4    | 0.00734 | 0.45596 | 0.219 | 0.34 | 1 MS.Trt_vs_MS.NoTrt_F |
| ZC3H15   | 0.00734 | 0.46568 | 0.198 | 0.33 | 1 MS.Trt_vs_MS.NoTrt_F |
| ANKRD36B | 0.00735 | 0.56068 | 0.644 | 0.77 | 1 MS.Trt_vs_MS.NoTrt_F |
| NDUFAF4  | 0.00736 | 0.26668 | 0.094 | 0.18 | 1 MS.Trt_vs_MS.NoTrt_F |
| PPP3R1   | 0.00738 | -0.5663 | 0.147 | 0.24 | 1 MS.Trt_vs_MS.NoTrt_F |
| USP13    | 0.00741 | -0.3664 | 0.302 | 0.43 | 1 MS.Trt_vs_MS.NoTrt_F |
| LRRC8A   | 0.00741 | -0.6392 | 0.115 | 0.21 | 1 MS.Trt_vs_MS.NoTrt_F |
| VPS37B   | 0.00741 | -0.5752 | 0.615 | 0.74 | 1 MS.Trt_vs_MS.NoTrt_F |
| TRPS1    | 0.00742 | -1.1908 | 0.104 | 0.19 | 1 MS.Trt_vs_MS.NoTrt_F |
| SLAMF6   | 0.00743 | -0.4652 | 0.468 | 0.56 | 1 MS.Trt_vs_MS.NoTrt_F |
| PIK3CD   | 0.00743 | -0.3778 | 0.626 | 0.71 | 1 MS.Trt_vs_MS.NoTrt_F |
| FKBP5    | 0.00746 | 0.40386 | 0.745 | 0.88 | 1 MS.Trt_vs_MS.NoTrt_F |
| GREB1    | 0.00748 | 0.30996 | 0.827 | 0.82 | 1 MS.Trt_vs_MS.NoTrt_F |
| AKAP17A  | 0.00749 | -0.8926 | 0.101 | 0.19 | 1 MS.Trt_vs_MS.NoTrt_F |
| UBAC2    | 0.00752 | -0.2647 | 0.576 | 0.67 | 1 MS.Trt_vs_MS.NoTrt_F |
| CES3     | 0.00753 | -0.2918 | 0.259 | 0.39 | 1 MS.Trt_vs_MS.NoTrt_F |
| SFPQ     | 0.00758 | 0.46046 | 0.54  | 0.69 | 1 MS.Trt_vs_MS.NoTrt_F |
| ESYT2    | 0.0076  | 0.31481 | 0.561 | 0.71 | 1 MS.Trt_vs_MS.NoTrt_F |
| ZNF319   | 0.0076  | 0.26172 | 0.076 | 0.16 | 1 MS.Trt_vs_MS.NoTrt_F |
| ANKRD46  | 0.00763 | -0.6885 | 0.198 | 0.3  | 1 MS.Trt_vs_MS.NoTrt_F |
| CYB5D2   | 0.00763 | 0.31597 | 0.378 | 0.53 | 1 MS.Trt_vs_MS.NoTrt_F |
| CCDC191  | 0.00767 | -0.6877 | 0.201 | 0.31 | 1 MS.Trt_vs_MS.NoTrt_F |
| TSPAN32  | 0.0077  | 0.5906  | 0.227 | 0.36 | 1 MS.Trt_vs_MS.NoTrt_F |
| ENTPD1   | 0.00771 | -0.3367 | 0.935 | 0.98 | 1 MS.Trt_vs_MS.NoTrt_F |
| SLC22A23 | 0.00771 | -0.9009 | 0.079 | 0.16 | 1 MS.Trt_vs_MS.NoTrt_F |
| MTPN     | 0.00772 | 0.62804 | 0.198 | 0.33 | 1 MS.Trt_vs_MS.NoTrt_F |
| QARS     | 0.00773 | -0.4331 | 0.237 | 0.36 | 1 MS.Trt_vs_MS.NoTrt_F |
| TTF2     | 0.00773 | 0.25534 | 0.709 | 0.82 | 1 MS.Trt_vs_MS.NoTrt_F |
| PLEKHF1  | 0.00776 | 0.25623 | 0.158 | 0.27 | 1 MS.Trt_vs_MS.NoTrt_F |
| IFT122   | 0.00777 | -0.312  | 0.849 | 0.93 | 1 MS.Trt_vs_MS.NoTrt_F |
| TMEM104  | 0.00782 | -0.6043 | 0.155 | 0.26 | 1 MS.Trt_vs_MS.NoTrt_F |
| SHROOM1  | 0.00782 | -0.2753 | 0.342 | 0.46 | 1 MS.Trt_vs_MS.NoTrt_F |
| NECAP2   | 0.00783 | 0.37644 | 0.457 | 0.61 | 1 MS.Trt_vs_MS.NoTrt_F |
| GPR171   | 0.00783 | -1.1139 | 0.058 | 0.13 | 1 MS.Trt_vs_MS.NoTrt_F |
| NDRG3    | 0.00783 | 0.40397 | 0.381 | 0.53 | 1 MS.Trt_vs_MS.NoTrt_F |

|          |         |         |       |      |                        |
|----------|---------|---------|-------|------|------------------------|
| ARL6IP4  | 0.00784 | 0.34599 | 0.313 | 0.49 | 1 MS.Trt_vs_MS.NoTrt_F |
| PARG     | 0.00786 | 0.8502  | 0.155 | 0.27 | 1 MS.Trt_vs_MS.NoTrt_F |
| RPGR     | 0.0079  | -0.8729 | 0.068 | 0.14 | 1 MS.Trt_vs_MS.NoTrt_F |
| VARS     | 0.0079  | -0.4187 | 0.083 | 0.17 | 1 MS.Trt_vs_MS.NoTrt_F |
| ACTR6    | 0.00791 | -0.45   | 0.547 | 0.65 | 1 MS.Trt_vs_MS.NoTrt_F |
| NSUN2    | 0.00796 | -0.2667 | 0.594 | 0.74 | 1 MS.Trt_vs_MS.NoTrt_F |
| SNX27    | 0.00797 | 0.34881 | 0.676 | 0.81 | 1 MS.Trt_vs_MS.NoTrt_F |
| GCC1     | 0.00798 | -1.6026 | 0.327 | 0.45 | 1 MS.Trt_vs_MS.NoTrt_F |
| PSAT1    | 0.00799 | -0.7825 | 0.076 | 0.16 | 1 MS.Trt_vs_MS.NoTrt_F |
| PDRG1    | 0.00799 | -0.495  | 0.097 | 0.18 | 1 MS.Trt_vs_MS.NoTrt_F |
| PANK4    | 0.008   | -0.3932 | 0.079 | 0.16 | 1 MS.Trt_vs_MS.NoTrt_F |
| STK39    | 0.00802 | -0.2652 | 0.144 | 0.25 | 1 MS.Trt_vs_MS.NoTrt_F |
| ADNP     | 0.00803 | 0.78279 | 0.428 | 0.6  | 1 MS.Trt_vs_MS.NoTrt_F |
| ADSL     | 0.00803 | -0.4939 | 0.827 | 0.89 | 1 MS.Trt_vs_MS.NoTrt_F |
| RNASSET2 | 0.00804 | 0.26832 | 0.435 | 0.61 | 1 MS.Trt_vs_MS.NoTrt_F |
| SPEF2    | 0.00806 | -0.8357 | 0.536 | 0.65 | 1 MS.Trt_vs_MS.NoTrt_F |
| BTBD19   | 0.00809 | 0.3027  | 0.766 | 0.72 | 1 MS.Trt_vs_MS.NoTrt_F |
| COPS4    | 0.00809 | 0.59346 | 0.453 | 0.57 | 1 MS.Trt_vs_MS.NoTrt_F |
| CCDC93   | 0.0081  | 0.38981 | 0.151 | 0.26 | 1 MS.Trt_vs_MS.NoTrt_F |
| BIN3     | 0.00812 | 0.50022 | 0.345 | 0.49 | 1 MS.Trt_vs_MS.NoTrt_F |
| MCM2     | 0.00812 | -0.6936 | 0.058 | 0.13 | 1 MS.Trt_vs_MS.NoTrt_F |
| TMEM164  | 0.00813 | 0.52752 | 0.079 | 0.16 | 1 MS.Trt_vs_MS.NoTrt_F |
| RNF181   | 0.00817 | 0.31037 | 0.169 | 0.29 | 1 MS.Trt_vs_MS.NoTrt_F |
| EAFL1    | 0.00818 | 0.68912 | 0.331 | 0.49 | 1 MS.Trt_vs_MS.NoTrt_F |
| PRDM4    | 0.00819 | 1.17586 | 0.086 | 0.17 | 1 MS.Trt_vs_MS.NoTrt_F |
| FDX2     | 0.0082  | 0.54103 | 0.068 | 0.14 | 1 MS.Trt_vs_MS.NoTrt_F |
| PSMB1    | 0.0082  | 0.37001 | 0.313 | 0.47 | 1 MS.Trt_vs_MS.NoTrt_F |
| MAGOHB   | 0.00821 | -0.3223 | 0.104 | 0.19 | 1 MS.Trt_vs_MS.NoTrt_F |
| RPAP3    | 0.00821 | 0.28733 | 0.586 | 0.76 | 1 MS.Trt_vs_MS.NoTrt_F |
| ARF1     | 0.00821 | 0.25232 | 0.46  | 0.65 | 1 MS.Trt_vs_MS.NoTrt_F |
| SPOPL    | 0.00824 | 0.33016 | 0.079 | 0.16 | 1 MS.Trt_vs_MS.NoTrt_F |
| ZNF775   | 0.00825 | -0.4574 | 0.072 | 0.15 | 1 MS.Trt_vs_MS.NoTrt_F |
| TRAF4    | 0.00827 | -1.0151 | 0.061 | 0.13 | 1 MS.Trt_vs_MS.NoTrt_F |
| ABHD5    | 0.0083  | -0.5602 | 0.126 | 0.22 | 1 MS.Trt_vs_MS.NoTrt_F |
| WIPF1    | 0.00831 | -0.3479 | 0.694 | 0.8  | 1 MS.Trt_vs_MS.NoTrt_F |
| ISOC1    | 0.00836 | 0.34318 | 0.119 | 0.22 | 1 MS.Trt_vs_MS.NoTrt_F |
| EMC9     | 0.00837 | -0.567  | 0.065 | 0.14 | 1 MS.Trt_vs_MS.NoTrt_F |
| PDZD11   | 0.00837 | -0.305  | 0.112 | 0.2  | 1 MS.Trt_vs_MS.NoTrt_F |
| NFXL1    | 0.00838 | -0.7506 | 0.112 | 0.2  | 1 MS.Trt_vs_MS.NoTrt_F |
| ZNF624   | 0.00842 | -0.7996 | 0.378 | 0.52 | 1 MS.Trt_vs_MS.NoTrt_F |

|          |         |         |       |      |                        |
|----------|---------|---------|-------|------|------------------------|
| HDAC6    | 0.00845 | -0.5    | 0.86  | 0.92 | 1 MS.Trt_vs_MS.NoTrt_F |
| CEP89    | 0.00847 | -0.3156 | 0.842 | 0.93 | 1 MS.Trt_vs_MS.NoTrt_F |
| PLCXD2   | 0.00849 | -1.4772 | 0.09  | 0.17 | 1 MS.Trt_vs_MS.NoTrt_F |
| FMO3     | 0.00853 | 0.35627 | 0.687 | 0.61 | 1 MS.Trt_vs_MS.NoTrt_F |
| RHOQ     | 0.00855 | 0.56989 | 0.086 | 0.17 | 1 MS.Trt_vs_MS.NoTrt_F |
| POTEC    | 0.00855 | 0.26316 | 0.356 | 0.51 | 1 MS.Trt_vs_MS.NoTrt_F |
| ZNF155   | 0.00856 | -1.0261 | 0.054 | 0.12 | 1 MS.Trt_vs_MS.NoTrt_F |
| EEF2KMT  | 0.00857 | 0.25648 | 0.094 | 0.18 | 1 MS.Trt_vs_MS.NoTrt_F |
| ATG4A    | 0.00857 | 0.66005 | 0.083 | 0.17 | 1 MS.Trt_vs_MS.NoTrt_F |
| FBXO22   | 0.00857 | -0.4446 | 0.748 | 0.82 | 1 MS.Trt_vs_MS.NoTrt_F |
| IRF1     | 0.00858 | -0.5161 | 0.849 | 0.92 | 1 MS.Trt_vs_MS.NoTrt_F |
| WDR35    | 0.00859 | 0.84921 | 0.083 | 0.17 | 1 MS.Trt_vs_MS.NoTrt_F |
| CTSA     | 0.00861 | -0.7721 | 0.644 | 0.74 | 1 MS.Trt_vs_MS.NoTrt_F |
| ZNF514   | 0.00865 | -1.2963 | 0.586 | 0.69 | 1 MS.Trt_vs_MS.NoTrt_F |
| ACVR2B   | 0.00868 | -0.7078 | 0.396 | 0.53 | 1 MS.Trt_vs_MS.NoTrt_F |
| RMI1     | 0.00869 | 0.54553 | 0.245 | 0.38 | 1 MS.Trt_vs_MS.NoTrt_F |
| IPPK     | 0.00872 | 0.41012 | 0.083 | 0.17 | 1 MS.Trt_vs_MS.NoTrt_F |
| TMED9    | 0.00872 | 0.32594 | 0.32  | 0.47 | 1 MS.Trt_vs_MS.NoTrt_F |
| RIC8B    | 0.00875 | -0.3122 | 0.162 | 0.26 | 1 MS.Trt_vs_MS.NoTrt_F |
| TULP3    | 0.00877 | -1.0386 | 0.058 | 0.13 | 1 MS.Trt_vs_MS.NoTrt_F |
| GSTCD    | 0.00877 | -0.3723 | 0.619 | 0.74 | 1 MS.Trt_vs_MS.NoTrt_F |
| CNOT8    | 0.00879 | 0.39899 | 0.216 | 0.34 | 1 MS.Trt_vs_MS.NoTrt_F |
| TYMP     | 0.0088  | -0.4302 | 0.324 | 0.45 | 1 MS.Trt_vs_MS.NoTrt_F |
| KANSL2   | 0.00882 | 0.58228 | 0.155 | 0.27 | 1 MS.Trt_vs_MS.NoTrt_F |
| CDC42BPB | 0.00885 | 0.52777 | 0.061 | 0.13 | 1 MS.Trt_vs_MS.NoTrt_F |
| ROBO4    | 0.00886 | -1.0911 | 0.169 | 0.27 | 1 MS.Trt_vs_MS.NoTrt_F |
| TMEM186  | 0.00886 | -0.7939 | 0.478 | 0.61 | 1 MS.Trt_vs_MS.NoTrt_F |
| PHPT1    | 0.00889 | 0.81757 | 0.144 | 0.25 | 1 MS.Trt_vs_MS.NoTrt_F |
| FAM65A   | 0.0089  | -0.4648 | 0.126 | 0.22 | 1 MS.Trt_vs_MS.NoTrt_F |
| FOXP3    | 0.00891 | -0.2697 | 0.417 | 0.56 | 1 MS.Trt_vs_MS.NoTrt_F |
| RGP1     | 0.00893 | -0.4165 | 0.162 | 0.27 | 1 MS.Trt_vs_MS.NoTrt_F |
| EMG1     | 0.00897 | 0.37142 | 0.126 | 0.23 | 1 MS.Trt_vs_MS.NoTrt_F |
| CCDC82   | 0.00897 | 0.48682 | 0.165 | 0.28 | 1 MS.Trt_vs_MS.NoTrt_F |
| RPUSD1   | 0.00901 | 0.50135 | 0.115 | 0.21 | 1 MS.Trt_vs_MS.NoTrt_F |
| ZCWPW1   | 0.00901 | 0.35551 | 0.086 | 0.17 | 1 MS.Trt_vs_MS.NoTrt_F |
| RALGAPA2 | 0.00902 | 0.53807 | 0.14  | 0.25 | 1 MS.Trt_vs_MS.NoTrt_F |
| PFKFB3   | 0.00903 | -0.2748 | 0.281 | 0.4  | 1 MS.Trt_vs_MS.NoTrt_F |
| UQCQRQ   | 0.00903 | 0.32104 | 0.572 | 0.7  | 1 MS.Trt_vs_MS.NoTrt_F |
| C12orf40 | 0.00904 | -0.925  | 0.237 | 0.36 | 1 MS.Trt_vs_MS.NoTrt_F |
| LRIF1    | 0.00907 | -0.6475 | 0.101 | 0.19 | 1 MS.Trt_vs_MS.NoTrt_F |



|            |         |         |       |      |                        |
|------------|---------|---------|-------|------|------------------------|
| ZFYVE16    | 0.00908 | 0.30591 | 0.957 | 0.9  | 1 MS.Trt_vs_MS.NoTrt_F |
| RABGAP1    | 0.00908 | -0.4608 | 0.363 | 0.5  | 1 MS.Trt_vs_MS.NoTrt_F |
| PLCL2      | 0.00911 | 0.31118 | 0.072 | 0.15 | 1 MS.Trt_vs_MS.NoTrt_F |
| ZNF518B    | 0.00914 | 0.6442  | 0.094 | 0.18 | 1 MS.Trt_vs_MS.NoTrt_F |
| EIF2B4     | 0.00915 | 0.42903 | 0.442 | 0.61 | 1 MS.Trt_vs_MS.NoTrt_F |
| RAB5B      | 0.00919 | -0.443  | 0.888 | 0.91 | 1 MS.Trt_vs_MS.NoTrt_F |
| GXYLT1     | 0.0092  | -0.5229 | 0.417 | 0.53 | 1 MS.Trt_vs_MS.NoTrt_F |
| SAP30L     | 0.00922 | -1.2029 | 0.047 | 0.11 | 1 MS.Trt_vs_MS.NoTrt_F |
| WRB        | 0.00922 | 0.29602 | 0.083 | 0.17 | 1 MS.Trt_vs_MS.NoTrt_F |
| RAD52      | 0.00922 | -0.323  | 0.266 | 0.39 | 1 MS.Trt_vs_MS.NoTrt_F |
| HSBP1L1    | 0.00923 | -0.4344 | 0.345 | 0.47 | 1 MS.Trt_vs_MS.NoTrt_F |
| SIRT6      | 0.00925 | 0.3768  | 0.083 | 0.17 | 1 MS.Trt_vs_MS.NoTrt_F |
| PI16       | 0.00926 | 0.59305 | 0.158 | 0.27 | 1 MS.Trt_vs_MS.NoTrt_F |
| TARBP2     | 0.00928 | -0.5367 | 0.097 | 0.18 | 1 MS.Trt_vs_MS.NoTrt_F |
| FBRSL1     | 0.0093  | 0.30739 | 0.101 | 0.19 | 1 MS.Trt_vs_MS.NoTrt_F |
| CHD9       | 0.00935 | -0.6794 | 0.41  | 0.54 | 1 MS.Trt_vs_MS.NoTrt_F |
| SOWAHC     | 0.0094  | -0.4413 | 0.457 | 0.55 | 1 MS.Trt_vs_MS.NoTrt_F |
| TF         | 0.00941 | -0.3013 | 0.892 | 0.91 | 1 MS.Trt_vs_MS.NoTrt_F |
| NLRP2      | 0.00941 | 0.78224 | 0.824 | 0.8  | 1 MS.Trt_vs_MS.NoTrt_F |
| ATPIF1     | 0.00942 | 0.49129 | 0.245 | 0.4  | 1 MS.Trt_vs_MS.NoTrt_F |
| RUNDC1     | 0.00942 | 0.85245 | 0.752 | 0.71 | 1 MS.Trt_vs_MS.NoTrt_F |
| EPB41L2    | 0.00943 | -1.0942 | 0.122 | 0.22 | 1 MS.Trt_vs_MS.NoTrt_F |
| ZNF622     | 0.00946 | 0.3536  | 0.144 | 0.25 | 1 MS.Trt_vs_MS.NoTrt_F |
| UTP3       | 0.00946 | -0.2854 | 0.05  | 0.12 | 1 MS.Trt_vs_MS.NoTrt_F |
| MALSU1     | 0.00951 | 0.47692 | 0.126 | 0.22 | 1 MS.Trt_vs_MS.NoTrt_F |
| FBXO3      | 0.00951 | 0.63342 | 0.266 | 0.39 | 1 MS.Trt_vs_MS.NoTrt_F |
| TOP2B      | 0.00956 | 0.30346 | 0.237 | 0.37 | 1 MS.Trt_vs_MS.NoTrt_F |
| CCNE2      | 0.00957 | -0.5154 | 0.05  | 0.12 | 1 MS.Trt_vs_MS.NoTrt_F |
| DIS3       | 0.00958 | -0.3743 | 0.651 | 0.76 | 1 MS.Trt_vs_MS.NoTrt_F |
| RP11-77K12 | 0.00958 | -0.3054 | 0.061 | 0.13 | 1 MS.Trt_vs_MS.NoTrt_F |
| TAF1       | 0.00963 | -0.2782 | 0.745 | 0.85 | 1 MS.Trt_vs_MS.NoTrt_F |
| ARMC7      | 0.00964 | -0.2751 | 0.097 | 0.18 | 1 MS.Trt_vs_MS.NoTrt_F |
| ZDHHC6     | 0.00967 | 0.40294 | 0.165 | 0.28 | 1 MS.Trt_vs_MS.NoTrt_F |
| CCS        | 0.0097  | -0.6439 | 0.183 | 0.29 | 1 MS.Trt_vs_MS.NoTrt_F |
| BTA1F1     | 0.0097  | 0.34612 | 0.248 | 0.37 | 1 MS.Trt_vs_MS.NoTrt_F |
| TMTC4      | 0.00972 | -0.7702 | 0.086 | 0.17 | 1 MS.Trt_vs_MS.NoTrt_F |
| ZNF620     | 0.00976 | -0.3094 | 0.665 | 0.81 | 1 MS.Trt_vs_MS.NoTrt_F |
| SLC6A1     | 0.00976 | -0.3066 | 0.522 | 0.64 | 1 MS.Trt_vs_MS.NoTrt_F |
| OR52A1     | 0.00978 | 0.39732 | 0.799 | 0.75 | 1 MS.Trt_vs_MS.NoTrt_F |
| COX5B      | 0.00978 | 0.65221 | 0.791 | 0.88 | 1 MS.Trt_vs_MS.NoTrt_F |

|             |         |         |       |      |                        |
|-------------|---------|---------|-------|------|------------------------|
| EPS15L1     | 0.00979 | -0.56   | 0.799 | 0.9  | 1 MS.Trt_vs_MS.NoTrt_F |
| PSMF1       | 0.0098  | 0.4376  | 0.227 | 0.36 | 1 MS.Trt_vs_MS.NoTrt_F |
| EPHX1       | 0.00982 | -0.3299 | 0.097 | 0.18 | 1 MS.Trt_vs_MS.NoTrt_F |
| USP8        | 0.00983 | 0.35043 | 0.986 | 0.99 | 1 MS.Trt_vs_MS.NoTrt_F |
| NHP2        | 0.00985 | 0.55666 | 0.187 | 0.31 | 1 MS.Trt_vs_MS.NoTrt_F |
| LIN54       | 0.00985 | -0.3132 | 0.565 | 0.66 | 1 MS.Trt_vs_MS.NoTrt_F |
| CMC1        | 0.00986 | 0.42526 | 0.191 | 0.31 | 1 MS.Trt_vs_MS.NoTrt_F |
| TBC1D2B     | 0.00986 | 0.33713 | 0.295 | 0.41 | 1 MS.Trt_vs_MS.NoTrt_F |
| SSSCA1      | 0.00988 | 0.64801 | 0.097 | 0.18 | 1 MS.Trt_vs_MS.NoTrt_F |
| MBNL3       | 0.00991 | 0.32787 | 0.108 | 0.2  | 1 MS.Trt_vs_MS.NoTrt_F |
| NRF1        | 0.00991 | 0.27264 | 0.306 | 0.44 | 1 MS.Trt_vs_MS.NoTrt_F |
| NOG         | 0.00993 | 1.55009 | 0.129 | 0.24 | 1 MS.Trt_vs_MS.NoTrt_F |
| TTI1        | 0.00994 | 0.64168 | 0.234 | 0.37 | 1 MS.Trt_vs_MS.NoTrt_F |
| ZNF671      | 0.00994 | -0.6748 | 0.097 | 0.18 | 1 MS.Trt_vs_MS.NoTrt_F |
| MEI1        | 0.00994 | -0.3161 | 0.687 | 0.77 | 1 MS.Trt_vs_MS.NoTrt_F |
| TBP         | 0.01    | 0.56203 | 0.335 | 0.48 | 1 MS.Trt_vs_MS.NoTrt_F |
| NCBP2-AS2   | 0.01002 | 0.39351 | 0.119 | 0.22 | 1 MS.Trt_vs_MS.NoTrt_F |
| AL592183.1  | 0.01003 | -0.2845 | 0.119 | 0.21 | 1 MS.Trt_vs_MS.NoTrt_F |
| PIGG        | 0.01003 | -0.3277 | 0.511 | 0.62 | 1 MS.Trt_vs_MS.NoTrt_F |
| CNPPD1      | 0.01005 | 0.34635 | 0.281 | 0.43 | 1 MS.Trt_vs_MS.NoTrt_F |
| SLC25A32    | 0.01007 | 0.75777 | 0.338 | 0.47 | 1 MS.Trt_vs_MS.NoTrt_F |
| FNDC3B      | 0.01007 | 0.57367 | 0.745 | 0.65 | 1 MS.Trt_vs_MS.NoTrt_F |
| MUT         | 0.0101  | 0.26284 | 0.09  | 0.17 | 1 MS.Trt_vs_MS.NoTrt_F |
| HSD17B8     | 0.01011 | 0.79816 | 0.079 | 0.16 | 1 MS.Trt_vs_MS.NoTrt_F |
| TMEM221     | 0.01011 | -0.3537 | 0.183 | 0.28 | 1 MS.Trt_vs_MS.NoTrt_F |
| UQCC2       | 0.01013 | 0.80353 | 0.112 | 0.2  | 1 MS.Trt_vs_MS.NoTrt_F |
| SPICE1      | 0.01014 | -0.3552 | 0.234 | 0.34 | 1 MS.Trt_vs_MS.NoTrt_F |
| MYSM1       | 0.01016 | 0.41907 | 0.227 | 0.35 | 1 MS.Trt_vs_MS.NoTrt_F |
| STK11IP     | 0.01016 | 0.28971 | 0.097 | 0.18 | 1 MS.Trt_vs_MS.NoTrt_F |
| ADAM19      | 0.01017 | 0.56824 | 0.36  | 0.55 | 1 MS.Trt_vs_MS.NoTrt_F |
| GANAB       | 0.01024 | -0.8664 | 0.446 | 0.53 | 1 MS.Trt_vs_MS.NoTrt_F |
| MDC1        | 0.01026 | 0.26353 | 0.115 | 0.2  | 1 MS.Trt_vs_MS.NoTrt_F |
| TRIB3       | 0.01028 | 0.34722 | 0.072 | 0.15 | 1 MS.Trt_vs_MS.NoTrt_F |
| ATP8B2      | 0.0103  | -0.3084 | 0.802 | 0.86 | 1 MS.Trt_vs_MS.NoTrt_F |
| TRMT10C     | 0.01036 | 0.93285 | 0.104 | 0.19 | 1 MS.Trt_vs_MS.NoTrt_F |
| GALNT7      | 0.01039 | 0.46896 | 0.101 | 0.19 | 1 MS.Trt_vs_MS.NoTrt_F |
| GS1-114I9.3 | 0.01039 | 1.06673 | 0.058 | 0.13 | 1 MS.Trt_vs_MS.NoTrt_F |
| EIF2S2      | 0.0104  | 0.30124 | 0.241 | 0.38 | 1 MS.Trt_vs_MS.NoTrt_F |
| C1orf146    | 0.01042 | -0.2912 | 0.151 | 0.25 | 1 MS.Trt_vs_MS.NoTrt_F |
| OTUD7A      | 0.01042 | 0.32972 | 0.158 | 0.26 | 1 MS.Trt_vs_MS.NoTrt_F |

|         |         |         |       |      |   |                      |
|---------|---------|---------|-------|------|---|----------------------|
| SMN2    | 0.01042 | 0.31899 | 0.878 | 0.73 | 1 | MS.Trt_vs_MS.NoTrt_F |
| FAM162A | 0.01046 | -0.431  | 0.403 | 0.5  | 1 | MS.Trt_vs_MS.NoTrt_F |
| B4GALT1 | 0.01047 | 0.76877 | 0.712 | 0.74 | 1 | MS.Trt_vs_MS.NoTrt_F |
| PARP9   | 0.01047 | 0.57946 | 0.331 | 0.46 | 1 | MS.Trt_vs_MS.NoTrt_F |
| ARL4C   | 0.01053 | 0.26905 | 0.399 | 0.58 | 1 | MS.Trt_vs_MS.NoTrt_F |
| AK1     | 0.01055 | 0.74818 | 0.104 | 0.19 | 1 | MS.Trt_vs_MS.NoTrt_F |
| LRRC28  | 0.01056 | -0.7675 | 0.54  | 0.67 | 1 | MS.Trt_vs_MS.NoTrt_F |
| NDUFB10 | 0.01057 | 0.58912 | 0.248 | 0.39 | 1 | MS.Trt_vs_MS.NoTrt_F |
| MTAP    | 0.01058 | 0.53211 | 0.658 | 0.87 | 1 | MS.Trt_vs_MS.NoTrt_F |
| QSER1   | 0.01061 | 0.48921 | 0.097 | 0.18 | 1 | MS.Trt_vs_MS.NoTrt_F |
| IBTK    | 0.01062 | -0.5907 | 0.522 | 0.62 | 1 | MS.Trt_vs_MS.NoTrt_F |
| INTS12  | 0.01062 | 0.28825 | 0.104 | 0.19 | 1 | MS.Trt_vs_MS.NoTrt_F |
| AMPD3   | 0.01071 | -1.3494 | 0.331 | 0.47 | 1 | MS.Trt_vs_MS.NoTrt_F |
| IFT172  | 0.01072 | -0.9388 | 0.59  | 0.7  | 1 | MS.Trt_vs_MS.NoTrt_F |
| SOX6    | 0.01072 | -0.5072 | 0.378 | 0.5  | 1 | MS.Trt_vs_MS.NoTrt_F |
| RNASE10 | 0.01073 | -0.2614 | 0.173 | 0.27 | 1 | MS.Trt_vs_MS.NoTrt_F |
| ELMO1   | 0.01081 | -0.4114 | 0.788 | 0.86 | 1 | MS.Trt_vs_MS.NoTrt_F |
| ANKRD37 | 0.01082 | -0.8303 | 0.104 | 0.19 | 1 | MS.Trt_vs_MS.NoTrt_F |
| LRRC40  | 0.01084 | 0.64074 | 0.144 | 0.24 | 1 | MS.Trt_vs_MS.NoTrt_F |
| ANKRD11 | 0.01085 | 0.63206 | 0.263 | 0.4  | 1 | MS.Trt_vs_MS.NoTrt_F |
| PSMB5   | 0.01087 | -0.5499 | 0.133 | 0.22 | 1 | MS.Trt_vs_MS.NoTrt_F |
| NOL10   | 0.01091 | -1.001  | 0.165 | 0.27 | 1 | MS.Trt_vs_MS.NoTrt_F |
| FAM19A2 | 0.01092 | -0.2858 | 0.212 | 0.32 | 1 | MS.Trt_vs_MS.NoTrt_F |
| PCNX3   | 0.01093 | 0.36108 | 0.133 | 0.23 | 1 | MS.Trt_vs_MS.NoTrt_F |
| ARMT1   | 0.01095 | -0.5072 | 0.086 | 0.17 | 1 | MS.Trt_vs_MS.NoTrt_F |
| RASGRP2 | 0.01096 | -0.3022 | 0.313 | 0.44 | 1 | MS.Trt_vs_MS.NoTrt_F |
| EP300   | 0.011   | -0.5258 | 0.658 | 0.79 | 1 | MS.Trt_vs_MS.NoTrt_F |
| GNPDA2  | 0.01101 | -0.6101 | 0.079 | 0.16 | 1 | MS.Trt_vs_MS.NoTrt_F |
| UBAP1L  | 0.01104 | -0.3155 | 0.324 | 0.45 | 1 | MS.Trt_vs_MS.NoTrt_F |
| PHF6    | 0.01108 | -0.887  | 0.647 | 0.74 | 1 | MS.Trt_vs_MS.NoTrt_F |
| PNMA1   | 0.01111 | 0.28254 | 0.097 | 0.18 | 1 | MS.Trt_vs_MS.NoTrt_F |
| TXNDC9  | 0.01111 | 0.39445 | 0.137 | 0.24 | 1 | MS.Trt_vs_MS.NoTrt_F |
| FAM206A | 0.01118 | -0.3651 | 0.083 | 0.16 | 1 | MS.Trt_vs_MS.NoTrt_F |
| PHF19   | 0.01119 | 0.72506 | 0.158 | 0.27 | 1 | MS.Trt_vs_MS.NoTrt_F |
| SF3A2   | 0.01125 | -0.3382 | 0.399 | 0.48 | 1 | MS.Trt_vs_MS.NoTrt_F |
| SCML4   | 0.01127 | 0.44351 | 0.572 | 0.75 | 1 | MS.Trt_vs_MS.NoTrt_F |
| NOMO1   | 0.0113  | 0.85187 | 0.165 | 0.27 | 1 | MS.Trt_vs_MS.NoTrt_F |
| MBOAT7  | 0.01134 | 0.59751 | 0.097 | 0.18 | 1 | MS.Trt_vs_MS.NoTrt_F |
| CD58    | 0.01135 | 0.28383 | 0.263 | 0.39 | 1 | MS.Trt_vs_MS.NoTrt_F |
| STK19   | 0.0114  | -0.3029 | 0.09  | 0.17 | 1 | MS.Trt_vs_MS.NoTrt_F |

|         |         |         |       |      |                        |
|---------|---------|---------|-------|------|------------------------|
| ERCC3   | 0.0114  | -0.3507 | 0.353 | 0.48 | 1 MS.Trt_vs_MS.NoTrt_F |
| AURKA   | 0.0114  | 0.65111 | 0.306 | 0.43 | 1 MS.Trt_vs_MS.NoTrt_F |
| IMPA2   | 0.01142 | 0.52332 | 0.874 | 0.82 | 1 MS.Trt_vs_MS.NoTrt_F |
| HIRIP3  | 0.01143 | 0.3232  | 0.101 | 0.19 | 1 MS.Trt_vs_MS.NoTrt_F |
| ZNF366  | 0.01144 | -0.3096 | 0.165 | 0.26 | 1 MS.Trt_vs_MS.NoTrt_F |
| CARMIL2 | 0.01144 | 0.2581  | 0.086 | 0.17 | 1 MS.Trt_vs_MS.NoTrt_F |
| TRMT2A  | 0.01146 | 0.37758 | 0.158 | 0.27 | 1 MS.Trt_vs_MS.NoTrt_F |
| POLL    | 0.01147 | 0.37267 | 0.392 | 0.53 | 1 MS.Trt_vs_MS.NoTrt_F |
| BCAS1   | 0.01149 | -1.9067 | 0.349 | 0.46 | 1 MS.Trt_vs_MS.NoTrt_F |
| WNT2B   | 0.0115  | 0.39598 | 0.453 | 0.56 | 1 MS.Trt_vs_MS.NoTrt_F |
| DMXL1   | 0.01155 | 1.03494 | 0.187 | 0.31 | 1 MS.Trt_vs_MS.NoTrt_F |
| ABCE1   | 0.01157 | -0.2702 | 0.36  | 0.46 | 1 MS.Trt_vs_MS.NoTrt_F |
| ACTR1A  | 0.01161 | -0.3555 | 0.471 | 0.58 | 1 MS.Trt_vs_MS.NoTrt_F |
| AP1AR   | 0.01162 | 0.89714 | 0.086 | 0.17 | 1 MS.Trt_vs_MS.NoTrt_F |
| RAB10   | 0.01162 | 0.33357 | 0.241 | 0.37 | 1 MS.Trt_vs_MS.NoTrt_F |
| NPIP9   | 0.01165 | 0.45251 | 0.137 | 0.23 | 1 MS.Trt_vs_MS.NoTrt_F |
| RPS14   | 0.01167 | 0.37597 | 0.964 | 1    | 1 MS.Trt_vs_MS.NoTrt_F |
| PATZ1   | 0.01168 | 0.40871 | 0.112 | 0.2  | 1 MS.Trt_vs_MS.NoTrt_F |
| MTMR3   | 0.01173 | -1.0194 | 0.241 | 0.35 | 1 MS.Trt_vs_MS.NoTrt_F |
| ZNF692  | 0.01174 | 0.26836 | 0.119 | 0.21 | 1 MS.Trt_vs_MS.NoTrt_F |
| TDG     | 0.01177 | -0.5542 | 0.327 | 0.42 | 1 MS.Trt_vs_MS.NoTrt_F |
| TARDBP  | 0.01179 | -0.3884 | 0.586 | 0.69 | 1 MS.Trt_vs_MS.NoTrt_F |
| KDM6B   | 0.01179 | -0.3052 | 0.183 | 0.29 | 1 MS.Trt_vs_MS.NoTrt_F |
| ADCY3   | 0.0118  | 0.28589 | 0.09  | 0.17 | 1 MS.Trt_vs_MS.NoTrt_F |
| GRAP    | 0.01185 | 0.40717 | 0.169 | 0.28 | 1 MS.Trt_vs_MS.NoTrt_F |
| ZNF212  | 0.01185 | -0.8874 | 0.371 | 0.48 | 1 MS.Trt_vs_MS.NoTrt_F |
| PEX19   | 0.01189 | 0.26987 | 0.14  | 0.24 | 1 MS.Trt_vs_MS.NoTrt_F |
| ZDHHC24 | 0.01189 | 0.28722 | 0.91  | 0.87 | 1 MS.Trt_vs_MS.NoTrt_F |
| STYX    | 0.01192 | 0.45418 | 0.504 | 0.64 | 1 MS.Trt_vs_MS.NoTrt_F |
| KDM6A   | 0.01193 | -0.4988 | 0.245 | 0.36 | 1 MS.Trt_vs_MS.NoTrt_F |
| PMPCA   | 0.01194 | -0.2521 | 0.705 | 0.8  | 1 MS.Trt_vs_MS.NoTrt_F |
| TNRC6C  | 0.01194 | 0.46537 | 0.266 | 0.39 | 1 MS.Trt_vs_MS.NoTrt_F |
| NSUN5   | 0.01194 | 0.4304  | 0.277 | 0.41 | 1 MS.Trt_vs_MS.NoTrt_F |
| DPP8    | 0.01203 | -0.4931 | 0.363 | 0.44 | 1 MS.Trt_vs_MS.NoTrt_F |
| DNAJC9  | 0.01207 | 0.44126 | 0.169 | 0.28 | 1 MS.Trt_vs_MS.NoTrt_F |
| MLH3    | 0.0121  | 0.37038 | 0.122 | 0.22 | 1 MS.Trt_vs_MS.NoTrt_F |
| SEL1L3  | 0.0121  | 0.36363 | 0.27  | 0.4  | 1 MS.Trt_vs_MS.NoTrt_F |
| ATG2A   | 0.0121  | -0.4604 | 0.705 | 0.75 | 1 MS.Trt_vs_MS.NoTrt_F |
| MESDC2  | 0.01214 | 0.76524 | 0.504 | 0.66 | 1 MS.Trt_vs_MS.NoTrt_F |
| NXF1    | 0.01215 | -0.3286 | 0.558 | 0.67 | 1 MS.Trt_vs_MS.NoTrt_F |

|          |         |         |       |      |                        |
|----------|---------|---------|-------|------|------------------------|
| LSR      | 0.01217 | -0.7366 | 0.165 | 0.26 | 1 MS.Trt_vs_MS.NoTrt_F |
| PGD      | 0.01218 | -0.5187 | 0.104 | 0.19 | 1 MS.Trt_vs_MS.NoTrt_F |
| GRSF1    | 0.01219 | 0.2613  | 0.68  | 0.77 | 1 MS.Trt_vs_MS.NoTrt_F |
| F8A1     | 0.0122  | -0.3676 | 0.079 | 0.16 | 1 MS.Trt_vs_MS.NoTrt_F |
| SURF1    | 0.01226 | 0.37995 | 0.126 | 0.22 | 1 MS.Trt_vs_MS.NoTrt_F |
| ANAPC1   | 0.01228 | -0.5448 | 0.5   | 0.66 | 1 MS.Trt_vs_MS.NoTrt_F |
| NEK9     | 0.01228 | -0.4182 | 0.899 | 0.95 | 1 MS.Trt_vs_MS.NoTrt_F |
| PIAS4    | 0.01228 | 0.36875 | 0.205 | 0.32 | 1 MS.Trt_vs_MS.NoTrt_F |
| CD2AP    | 0.01235 | -0.3276 | 0.162 | 0.27 | 1 MS.Trt_vs_MS.NoTrt_F |
| DYNLT3   | 0.01235 | -0.6568 | 0.615 | 0.74 | 1 MS.Trt_vs_MS.NoTrt_F |
| FAM173A  | 0.01236 | 0.58388 | 0.094 | 0.18 | 1 MS.Trt_vs_MS.NoTrt_F |
| C14orf93 | 0.01237 | 0.4691  | 0.284 | 0.39 | 1 MS.Trt_vs_MS.NoTrt_F |
| KIF18A   | 0.01238 | 0.63765 | 0.291 | 0.42 | 1 MS.Trt_vs_MS.NoTrt_F |
| CCDC36   | 0.01244 | -0.293  | 0.32  | 0.45 | 1 MS.Trt_vs_MS.NoTrt_F |
| ZC3HAV1L | 0.01249 | -0.4495 | 0.396 | 0.52 | 1 MS.Trt_vs_MS.NoTrt_F |
| NOC3L    | 0.0125  | 0.40437 | 0.079 | 0.16 | 1 MS.Trt_vs_MS.NoTrt_F |
| DCAF16   | 0.01251 | -0.6368 | 0.748 | 0.82 | 1 MS.Trt_vs_MS.NoTrt_F |
| IPO8     | 0.01255 | 0.27591 | 0.489 | 0.62 | 1 MS.Trt_vs_MS.NoTrt_F |
| PCNP     | 0.01256 | 0.5949  | 0.241 | 0.38 | 1 MS.Trt_vs_MS.NoTrt_F |
| PJA1     | 0.01262 | -0.2693 | 0.083 | 0.16 | 1 MS.Trt_vs_MS.NoTrt_F |
| NUAK2    | 0.01265 | -0.8732 | 0.331 | 0.45 | 1 MS.Trt_vs_MS.NoTrt_F |
| RAD18    | 0.01265 | -0.3316 | 0.076 | 0.15 | 1 MS.Trt_vs_MS.NoTrt_F |
| RAP1GAP2 | 0.01266 | 0.60146 | 0.27  | 0.4  | 1 MS.Trt_vs_MS.NoTrt_F |
| CEP104   | 0.01271 | -0.6876 | 0.709 | 0.8  | 1 MS.Trt_vs_MS.NoTrt_F |
| MOV10    | 0.01272 | -0.4989 | 0.424 | 0.53 | 1 MS.Trt_vs_MS.NoTrt_F |
| TNIP3    | 0.01273 | 0.47047 | 0.478 | 0.64 | 1 MS.Trt_vs_MS.NoTrt_F |
| RGPD2    | 0.01275 | 0.79661 | 0.155 | 0.27 | 1 MS.Trt_vs_MS.NoTrt_F |
| ANAPC11  | 0.01277 | 1.08317 | 0.403 | 0.54 | 1 MS.Trt_vs_MS.NoTrt_F |
| UBAC1    | 0.01279 | 0.50168 | 0.076 | 0.15 | 1 MS.Trt_vs_MS.NoTrt_F |
| ZNF609   | 0.01282 | -1.0707 | 0.565 | 0.66 | 1 MS.Trt_vs_MS.NoTrt_F |
| RBFA     | 0.01283 | -0.6856 | 0.295 | 0.4  | 1 MS.Trt_vs_MS.NoTrt_F |
| USP10    | 0.01284 | 0.33105 | 0.23  | 0.35 | 1 MS.Trt_vs_MS.NoTrt_F |
| CHRNA6   | 0.0129  | 0.56587 | 0.374 | 0.28 | 1 MS.Trt_vs_MS.NoTrt_F |
| NLRP12   | 0.01292 | 0.29412 | 0.809 | 0.76 | 1 MS.Trt_vs_MS.NoTrt_F |
| GYG1     | 0.01292 | -0.6948 | 0.554 | 0.64 | 1 MS.Trt_vs_MS.NoTrt_F |
| PBLD     | 0.01293 | -0.4627 | 0.572 | 0.67 | 1 MS.Trt_vs_MS.NoTrt_F |
| WISP2    | 0.01295 | 0.94452 | 0.511 | 0.61 | 1 MS.Trt_vs_MS.NoTrt_F |
| SLC39A6  | 0.01295 | -0.4726 | 0.097 | 0.18 | 1 MS.Trt_vs_MS.NoTrt_F |
| UBE4B    | 0.01297 | 0.30515 | 0.547 | 0.68 | 1 MS.Trt_vs_MS.NoTrt_F |
| VPS45    | 0.013   | -0.5035 | 0.277 | 0.38 | 1 MS.Trt_vs_MS.NoTrt_F |

|          |         |         |       |      |   |                      |
|----------|---------|---------|-------|------|---|----------------------|
| GPR174   | 0.01301 | 0.43573 | 0.155 | 0.26 | 1 | MS.Trt_vs_MS.NoTrt_F |
| TBCK     | 0.01307 | -0.4674 | 0.615 | 0.76 | 1 | MS.Trt_vs_MS.NoTrt_F |
| MCC      | 0.01309 | -0.5259 | 0.432 | 0.53 | 1 | MS.Trt_vs_MS.NoTrt_F |
| AKAP1    | 0.01312 | -0.3114 | 0.104 | 0.19 | 1 | MS.Trt_vs_MS.NoTrt_F |
| GON7     | 0.01313 | -1.0943 | 0.058 | 0.12 | 1 | MS.Trt_vs_MS.NoTrt_F |
| ENGASE   | 0.01315 | 1.42322 | 0.079 | 0.16 | 1 | MS.Trt_vs_MS.NoTrt_F |
| TMEM110  | 0.01315 | -0.4727 | 0.079 | 0.16 | 1 | MS.Trt_vs_MS.NoTrt_F |
| MED30    | 0.01319 | 0.60446 | 0.137 | 0.24 | 1 | MS.Trt_vs_MS.NoTrt_F |
| HTATSF1  | 0.01319 | 0.62916 | 0.169 | 0.28 | 1 | MS.Trt_vs_MS.NoTrt_F |
| TOP1     | 0.01322 | 0.30692 | 0.173 | 0.28 | 1 | MS.Trt_vs_MS.NoTrt_F |
| ZNF343   | 0.01324 | -0.8195 | 0.432 | 0.54 | 1 | MS.Trt_vs_MS.NoTrt_F |
| PDCD2L   | 0.01329 | -0.5412 | 0.065 | 0.13 | 1 | MS.Trt_vs_MS.NoTrt_F |
| HDGF     | 0.01336 | -0.3643 | 0.094 | 0.17 | 1 | MS.Trt_vs_MS.NoTrt_F |
| SESN2    | 0.01344 | -1.0904 | 0.061 | 0.13 | 1 | MS.Trt_vs_MS.NoTrt_F |
| CCSAP    | 0.01346 | 0.94795 | 0.144 | 0.24 | 1 | MS.Trt_vs_MS.NoTrt_F |
| DAD1     | 0.01353 | 0.51352 | 0.324 | 0.53 | 1 | MS.Trt_vs_MS.NoTrt_F |
| 11-Sep   | 0.01354 | 0.37144 | 0.392 | 0.51 | 1 | MS.Trt_vs_MS.NoTrt_F |
| BRCC3    | 0.01355 | 0.54402 | 0.248 | 0.37 | 1 | MS.Trt_vs_MS.NoTrt_F |
| KBTBD6   | 0.01356 | -0.3602 | 0.353 | 0.46 | 1 | MS.Trt_vs_MS.NoTrt_F |
| SUMO1    | 0.01358 | 0.31312 | 0.496 | 0.61 | 1 | MS.Trt_vs_MS.NoTrt_F |
| UBN1     | 0.01363 | 0.34949 | 0.147 | 0.24 | 1 | MS.Trt_vs_MS.NoTrt_F |
| ZNF626   | 0.01364 | 0.31355 | 0.763 | 0.72 | 1 | MS.Trt_vs_MS.NoTrt_F |
| CLEC18A  | 0.01367 | 0.67374 | 0.32  | 0.43 | 1 | MS.Trt_vs_MS.NoTrt_F |
| FLCN     | 0.01373 | 0.29203 | 0.881 | 0.82 | 1 | MS.Trt_vs_MS.NoTrt_F |
| SMC6     | 0.01376 | -0.3898 | 0.442 | 0.56 | 1 | MS.Trt_vs_MS.NoTrt_F |
| MC1R     | 0.01377 | -0.9061 | 0.072 | 0.14 | 1 | MS.Trt_vs_MS.NoTrt_F |
| SAMD3    | 0.01379 | 0.29598 | 0.284 | 0.41 | 1 | MS.Trt_vs_MS.NoTrt_F |
| FLAD1    | 0.01382 | -0.3509 | 0.554 | 0.68 | 1 | MS.Trt_vs_MS.NoTrt_F |
| TXNRD2   | 0.01384 | -0.5734 | 0.827 | 0.91 | 1 | MS.Trt_vs_MS.NoTrt_F |
| KIF16B   | 0.01385 | -1.2826 | 0.068 | 0.14 | 1 | MS.Trt_vs_MS.NoTrt_F |
| DAPP1    | 0.01386 | 0.39397 | 0.245 | 0.37 | 1 | MS.Trt_vs_MS.NoTrt_F |
| TNFRSF18 | 0.01387 | 0.7275  | 0.198 | 0.33 | 1 | MS.Trt_vs_MS.NoTrt_F |
| NME1     | 0.01388 | 0.32543 | 0.734 | 0.56 | 1 | MS.Trt_vs_MS.NoTrt_F |
| NR4A3    | 0.01394 | -0.691  | 0.133 | 0.22 | 1 | MS.Trt_vs_MS.NoTrt_F |
| PEX6     | 0.01395 | -0.4014 | 0.061 | 0.13 | 1 | MS.Trt_vs_MS.NoTrt_F |
| ABO      | 0.01398 | -0.4101 | 0.331 | 0.45 | 1 | MS.Trt_vs_MS.NoTrt_F |
| ENOPH1   | 0.01399 | 0.32475 | 0.158 | 0.26 | 1 | MS.Trt_vs_MS.NoTrt_F |
| SCO2     | 0.01403 | 0.49523 | 0.076 | 0.15 | 1 | MS.Trt_vs_MS.NoTrt_F |
| CENPJ    | 0.01405 | -0.9549 | 0.061 | 0.13 | 1 | MS.Trt_vs_MS.NoTrt_F |
| TRAPPC3  | 0.01405 | 0.32754 | 0.392 | 0.5  | 1 | MS.Trt_vs_MS.NoTrt_F |

|          |         |         |       |      |   |                      |
|----------|---------|---------|-------|------|---|----------------------|
| METTL22  | 0.01407 | -0.3619 | 0.615 | 0.7  | 1 | MS.Trt_vs_MS.NoTrt_F |
| PCYT2    | 0.0141  | -0.2537 | 0.065 | 0.13 | 1 | MS.Trt_vs_MS.NoTrt_F |
| SBNO2    | 0.01415 | -0.3877 | 0.194 | 0.3  | 1 | MS.Trt_vs_MS.NoTrt_F |
| LDOC1L   | 0.01415 | -0.6768 | 0.068 | 0.14 | 1 | MS.Trt_vs_MS.NoTrt_F |
| TAF3     | 0.01416 | 0.41326 | 0.165 | 0.27 | 1 | MS.Trt_vs_MS.NoTrt_F |
| GRAMD3   | 0.01424 | -0.4668 | 0.676 | 0.86 | 1 | MS.Trt_vs_MS.NoTrt_F |
| PAIP1    | 0.01424 | 0.38634 | 0.162 | 0.27 | 1 | MS.Trt_vs_MS.NoTrt_F |
| MPP6     | 0.01426 | -0.2511 | 0.255 | 0.38 | 1 | MS.Trt_vs_MS.NoTrt_F |
| HLA-C    | 0.01426 | -0.4064 | 0.853 | 0.91 | 1 | MS.Trt_vs_MS.NoTrt_F |
| RTEL1    | 0.01432 | -0.964  | 0.115 | 0.2  | 1 | MS.Trt_vs_MS.NoTrt_F |
| ABCF1    | 0.01434 | -0.3444 | 0.817 | 0.89 | 1 | MS.Trt_vs_MS.NoTrt_F |
| PSD      | 0.01437 | -0.2987 | 0.108 | 0.19 | 1 | MS.Trt_vs_MS.NoTrt_F |
| TRPM8    | 0.01438 | 0.26103 | 0.777 | 0.61 | 1 | MS.Trt_vs_MS.NoTrt_F |
| FAF2     | 0.01439 | 0.79136 | 0.122 | 0.22 | 1 | MS.Trt_vs_MS.NoTrt_F |
| REXO2    | 0.01439 | 0.53036 | 0.209 | 0.33 | 1 | MS.Trt_vs_MS.NoTrt_F |
| SNRPD2   | 0.01442 | 0.34144 | 0.529 | 0.71 | 1 | MS.Trt_vs_MS.NoTrt_F |
| TEX261   | 0.01442 | -0.3263 | 0.09  | 0.17 | 1 | MS.Trt_vs_MS.NoTrt_F |
| TOLLIP   | 0.01442 | 0.53332 | 0.133 | 0.23 | 1 | MS.Trt_vs_MS.NoTrt_F |
| HDAC2    | 0.01445 | -0.2639 | 0.655 | 0.81 | 1 | MS.Trt_vs_MS.NoTrt_F |
| C1QBP    | 0.01447 | 0.52434 | 0.273 | 0.4  | 1 | MS.Trt_vs_MS.NoTrt_F |
| GOLGA8N  | 0.01448 | 1.05662 | 0.076 | 0.15 | 1 | MS.Trt_vs_MS.NoTrt_F |
| SGIP1    | 0.01449 | -0.3206 | 0.245 | 0.34 | 1 | MS.Trt_vs_MS.NoTrt_F |
| KLHL5    | 0.0145  | 0.59241 | 0.428 | 0.54 | 1 | MS.Trt_vs_MS.NoTrt_F |
| ZC4H2    | 0.01451 | -0.6733 | 0.094 | 0.17 | 1 | MS.Trt_vs_MS.NoTrt_F |
| SENP1    | 0.01452 | 0.82057 | 0.191 | 0.3  | 1 | MS.Trt_vs_MS.NoTrt_F |
| ZNF485   | 0.01452 | -0.3592 | 0.183 | 0.28 | 1 | MS.Trt_vs_MS.NoTrt_F |
| C2CD4A   | 0.01454 | -0.4219 | 0.288 | 0.39 | 1 | MS.Trt_vs_MS.NoTrt_F |
| NUDT18   | 0.01455 | -1.9548 | 0.05  | 0.11 | 1 | MS.Trt_vs_MS.NoTrt_F |
| CCDC71   | 0.01459 | 0.5951  | 0.079 | 0.16 | 1 | MS.Trt_vs_MS.NoTrt_F |
| NSG1     | 0.01465 | -0.3088 | 0.615 | 0.74 | 1 | MS.Trt_vs_MS.NoTrt_F |
| HIBADH   | 0.01467 | 0.62467 | 0.097 | 0.18 | 1 | MS.Trt_vs_MS.NoTrt_F |
| C2orf47  | 0.01473 | -0.7241 | 0.05  | 0.11 | 1 | MS.Trt_vs_MS.NoTrt_F |
| ETFDH    | 0.01475 | 0.59963 | 0.619 | 0.74 | 1 | MS.Trt_vs_MS.NoTrt_F |
| SMC2     | 0.01477 | 0.57382 | 0.083 | 0.16 | 1 | MS.Trt_vs_MS.NoTrt_F |
| ZNRF3    | 0.0148  | -0.4017 | 0.23  | 0.34 | 1 | MS.Trt_vs_MS.NoTrt_F |
| BCL2     | 0.01482 | 0.4363  | 0.263 | 0.38 | 1 | MS.Trt_vs_MS.NoTrt_F |
| ATAD5    | 0.01485 | -0.5819 | 0.5   | 0.64 | 1 | MS.Trt_vs_MS.NoTrt_F |
| KIAA0391 | 0.01487 | -0.4449 | 0.691 | 0.8  | 1 | MS.Trt_vs_MS.NoTrt_F |
| BCL10    | 0.01487 | 0.41583 | 0.079 | 0.16 | 1 | MS.Trt_vs_MS.NoTrt_F |
| ABLIM3   | 0.01491 | -0.6337 | 0.065 | 0.13 | 1 | MS.Trt_vs_MS.NoTrt_F |

|          |         |         |       |      |   |                      |
|----------|---------|---------|-------|------|---|----------------------|
| UBQLN4   | 0.01497 | 0.46718 | 0.065 | 0.13 | 1 | MS.Trt_vs_MS.NoTrt_F |
| BLK      | 0.015   | 0.96836 | 0.065 | 0.13 | 1 | MS.Trt_vs_MS.NoTrt_F |
| N4BP2    | 0.01501 | -0.3782 | 0.313 | 0.44 | 1 | MS.Trt_vs_MS.NoTrt_F |
| DHRS13   | 0.01501 | -0.3803 | 0.065 | 0.13 | 1 | MS.Trt_vs_MS.NoTrt_F |
| PSKH1    | 0.01504 | 0.62928 | 0.097 | 0.18 | 1 | MS.Trt_vs_MS.NoTrt_F |
| SIGLEC10 | 0.01506 | -0.3466 | 0.579 | 0.73 | 1 | MS.Trt_vs_MS.NoTrt_F |
| ITM2A    | 0.01506 | 0.47323 | 0.234 | 0.37 | 1 | MS.Trt_vs_MS.NoTrt_F |
| PLAGL2   | 0.01507 | -1.0114 | 0.068 | 0.14 | 1 | MS.Trt_vs_MS.NoTrt_F |
| LPCAT1   | 0.01508 | 0.30158 | 0.076 | 0.15 | 1 | MS.Trt_vs_MS.NoTrt_F |
| VPS13A   | 0.01509 | 0.30928 | 0.27  | 0.38 | 1 | MS.Trt_vs_MS.NoTrt_F |
| PPARG    | 0.0151  | -0.3361 | 0.424 | 0.52 | 1 | MS.Trt_vs_MS.NoTrt_F |
| PIGO     | 0.01513 | -0.5108 | 0.381 | 0.48 | 1 | MS.Trt_vs_MS.NoTrt_F |
| PLEKHO1  | 0.01514 | 0.43648 | 0.076 | 0.15 | 1 | MS.Trt_vs_MS.NoTrt_F |
| ZNF429   | 0.01519 | 0.77918 | 0.896 | 0.91 | 1 | MS.Trt_vs_MS.NoTrt_F |
| MIB1     | 0.01521 | -0.8877 | 0.119 | 0.2  | 1 | MS.Trt_vs_MS.NoTrt_F |
| PUDP     | 0.01522 | -0.4699 | 0.108 | 0.19 | 1 | MS.Trt_vs_MS.NoTrt_F |
| IFIT1    | 0.01524 | -0.7338 | 0.212 | 0.32 | 1 | MS.Trt_vs_MS.NoTrt_F |
| GPAM     | 0.01525 | -1.2498 | 0.058 | 0.12 | 1 | MS.Trt_vs_MS.NoTrt_F |
| ADNP2    | 0.01525 | 0.54493 | 0.072 | 0.14 | 1 | MS.Trt_vs_MS.NoTrt_F |
| KLHDC7B  | 0.01529 | -0.2991 | 0.061 | 0.13 | 1 | MS.Trt_vs_MS.NoTrt_F |
| LMAN2L   | 0.01529 | -0.5441 | 0.05  | 0.11 | 1 | MS.Trt_vs_MS.NoTrt_F |
| PTRF     | 0.01532 | 0.62805 | 0.353 | 0.46 | 1 | MS.Trt_vs_MS.NoTrt_F |
| TBC1D3L  | 0.01536 | 1.58578 | 0.094 | 0.17 | 1 | MS.Trt_vs_MS.NoTrt_F |
| TMX4     | 0.01537 | -0.4008 | 0.565 | 0.62 | 1 | MS.Trt_vs_MS.NoTrt_F |
| ICK      | 0.01538 | -1.442  | 0.201 | 0.29 | 1 | MS.Trt_vs_MS.NoTrt_F |
| ZNF581   | 0.01544 | -0.3013 | 0.09  | 0.17 | 1 | MS.Trt_vs_MS.NoTrt_F |
| RECQL5   | 0.01547 | -0.9357 | 0.191 | 0.29 | 1 | MS.Trt_vs_MS.NoTrt_F |
| OSGEPL1  | 0.0155  | 0.46988 | 0.252 | 0.39 | 1 | MS.Trt_vs_MS.NoTrt_F |
| ARHGAP5  | 0.0155  | -0.5472 | 0.414 | 0.53 | 1 | MS.Trt_vs_MS.NoTrt_F |
| BHLHE40  | 0.01553 | 0.48201 | 0.112 | 0.2  | 1 | MS.Trt_vs_MS.NoTrt_F |
| PRDX4    | 0.01559 | -0.3345 | 0.09  | 0.17 | 1 | MS.Trt_vs_MS.NoTrt_F |
| PLCG2    | 0.01565 | 1.13485 | 0.104 | 0.19 | 1 | MS.Trt_vs_MS.NoTrt_F |
| IGSF9B   | 0.01571 | -1.1578 | 0.054 | 0.12 | 1 | MS.Trt_vs_MS.NoTrt_F |
| CCR2     | 0.01572 | -0.734  | 0.115 | 0.2  | 1 | MS.Trt_vs_MS.NoTrt_F |
| SLC17A5  | 0.01577 | -0.3461 | 0.424 | 0.54 | 1 | MS.Trt_vs_MS.NoTrt_F |
| AGO4     | 0.01584 | -0.9173 | 0.309 | 0.4  | 1 | MS.Trt_vs_MS.NoTrt_F |
| BRD3     | 0.01585 | 0.49648 | 0.18  | 0.29 | 1 | MS.Trt_vs_MS.NoTrt_F |
| CC2D2B   | 0.01585 | 1.02766 | 0.119 | 0.21 | 1 | MS.Trt_vs_MS.NoTrt_F |
| VPS9D1   | 0.01589 | -0.3745 | 0.223 | 0.33 | 1 | MS.Trt_vs_MS.NoTrt_F |
| CCDC107  | 0.01596 | 0.32672 | 0.198 | 0.32 | 1 | MS.Trt_vs_MS.NoTrt_F |



|         |         |         |       |      |   |                      |
|---------|---------|---------|-------|------|---|----------------------|
| SLC37A4 | 0.01598 | -0.4836 | 0.05  | 0.11 | 1 | MS.Trt_vs_MS.NoTrt_F |
| ZNF701  | 0.01602 | 0.90971 | 0.442 | 0.57 | 1 | MS.Trt_vs_MS.NoTrt_F |
| LUZP1   | 0.01606 | -0.5699 | 0.55  | 0.63 | 1 | MS.Trt_vs_MS.NoTrt_F |
| SEMA3G  | 0.01607 | -0.6061 | 0.047 | 0.11 | 1 | MS.Trt_vs_MS.NoTrt_F |
| MRPL39  | 0.0161  | 0.32296 | 0.137 | 0.23 | 1 | MS.Trt_vs_MS.NoTrt_F |
| ECHS1   | 0.01611 | 0.57341 | 0.155 | 0.25 | 1 | MS.Trt_vs_MS.NoTrt_F |
| PRPF4   | 0.01612 | 0.37008 | 0.302 | 0.42 | 1 | MS.Trt_vs_MS.NoTrt_F |
| BRF2    | 0.01614 | -0.4266 | 0.147 | 0.24 | 1 | MS.Trt_vs_MS.NoTrt_F |
| POLM    | 0.01617 | 0.36938 | 0.518 | 0.64 | 1 | MS.Trt_vs_MS.NoTrt_F |
| ANKS1A  | 0.01625 | 0.76997 | 0.054 | 0.12 | 1 | MS.Trt_vs_MS.NoTrt_F |
| ARSG    | 0.01628 | -0.3006 | 0.932 | 0.97 | 1 | MS.Trt_vs_MS.NoTrt_F |
| GGNBP2  | 0.01634 | 0.31691 | 0.676 | 0.83 | 1 | MS.Trt_vs_MS.NoTrt_F |
| RNF168  | 0.01639 | 0.6018  | 0.568 | 0.74 | 1 | MS.Trt_vs_MS.NoTrt_F |
| AQP11   | 0.0164  | -0.2917 | 0.05  | 0.11 | 1 | MS.Trt_vs_MS.NoTrt_F |
| AKT1    | 0.01642 | 0.41114 | 0.209 | 0.31 | 1 | MS.Trt_vs_MS.NoTrt_F |
| COMMD6  | 0.01643 | 0.46327 | 0.363 | 0.55 | 1 | MS.Trt_vs_MS.NoTrt_F |
| GOSR1   | 0.01646 | 0.52956 | 0.968 | 0.97 | 1 | MS.Trt_vs_MS.NoTrt_F |
| ZNF282  | 0.01649 | 0.82391 | 0.065 | 0.13 | 1 | MS.Trt_vs_MS.NoTrt_F |
| ARPC5   | 0.01649 | 0.26309 | 0.892 | 0.96 | 1 | MS.Trt_vs_MS.NoTrt_F |
| DPH2    | 0.01651 | 1.51377 | 0.083 | 0.16 | 1 | MS.Trt_vs_MS.NoTrt_F |
| FBXO42  | 0.01655 | -0.2821 | 0.486 | 0.58 | 1 | MS.Trt_vs_MS.NoTrt_F |
| CLDN5   | 0.01655 | -0.8988 | 0.047 | 0.11 | 1 | MS.Trt_vs_MS.NoTrt_F |
| SLC26A1 | 0.01658 | -0.53   | 0.047 | 0.11 | 1 | MS.Trt_vs_MS.NoTrt_F |
| AKT1S1  | 0.01659 | -0.5115 | 0.18  | 0.28 | 1 | MS.Trt_vs_MS.NoTrt_F |
| ZBTB16  | 0.01663 | 0.62816 | 0.327 | 0.44 | 1 | MS.Trt_vs_MS.NoTrt_F |
| ERP27   | 0.01663 | 0.56615 | 0.219 | 0.34 | 1 | MS.Trt_vs_MS.NoTrt_F |
| POC5    | 0.01669 | -0.2933 | 0.112 | 0.2  | 1 | MS.Trt_vs_MS.NoTrt_F |
| GPR160  | 0.01671 | 0.33777 | 0.054 | 0.12 | 1 | MS.Trt_vs_MS.NoTrt_F |
| ACTR10  | 0.01673 | -0.3551 | 0.741 | 0.82 | 1 | MS.Trt_vs_MS.NoTrt_F |
| CEP72   | 0.0168  | 0.64271 | 0.065 | 0.13 | 1 | MS.Trt_vs_MS.NoTrt_F |
| BSCL2   | 0.01682 | -0.641  | 0.201 | 0.3  | 1 | MS.Trt_vs_MS.NoTrt_F |
| FBXO38  | 0.01682 | -0.5058 | 0.507 | 0.6  | 1 | MS.Trt_vs_MS.NoTrt_F |
| CAMK2D  | 0.01683 | 1.06885 | 0.227 | 0.35 | 1 | MS.Trt_vs_MS.NoTrt_F |
| PLPP5   | 0.01685 | 0.41188 | 0.878 | 0.93 | 1 | MS.Trt_vs_MS.NoTrt_F |
| SNAPC1  | 0.01689 | -0.2826 | 0.683 | 0.82 | 1 | MS.Trt_vs_MS.NoTrt_F |
| DDX41   | 0.0169  | 0.33062 | 0.129 | 0.22 | 1 | MS.Trt_vs_MS.NoTrt_F |
| TAPBPL  | 0.01693 | 0.25916 | 0.216 | 0.33 | 1 | MS.Trt_vs_MS.NoTrt_F |
| LYAR    | 0.01693 | 0.93488 | 0.112 | 0.2  | 1 | MS.Trt_vs_MS.NoTrt_F |
| PCNA    | 0.01696 | 0.44513 | 0.097 | 0.18 | 1 | MS.Trt_vs_MS.NoTrt_F |
| DDX43   | 0.01698 | -0.7696 | 0.147 | 0.24 | 1 | MS.Trt_vs_MS.NoTrt_F |

|         |         |         |       |      |                        |
|---------|---------|---------|-------|------|------------------------|
| FDXACB1 | 0.017   | -0.3816 | 0.388 | 0.51 | 1 MS.Trt_vs_MS.NoTrt_F |
| ITGA11  | 0.01708 | -0.278  | 0.561 | 0.7  | 1 MS.Trt_vs_MS.NoTrt_F |
| APOL3   | 0.01709 | -0.3397 | 0.176 | 0.27 | 1 MS.Trt_vs_MS.NoTrt_F |
| APH1B   | 0.01718 | 0.31451 | 0.094 | 0.17 | 1 MS.Trt_vs_MS.NoTrt_F |
| CNNM4   | 0.0172  | 0.83636 | 0.05  | 0.11 | 1 MS.Trt_vs_MS.NoTrt_F |
| SMARCA5 | 0.01721 | -0.3121 | 0.363 | 0.49 | 1 MS.Trt_vs_MS.NoTrt_F |
| APEX1   | 0.01721 | 0.57736 | 0.155 | 0.26 | 1 MS.Trt_vs_MS.NoTrt_F |
| ZBTB7A  | 0.01722 | 1.02949 | 0.126 | 0.22 | 1 MS.Trt_vs_MS.NoTrt_F |
| C2orf49 | 0.01726 | -0.3113 | 0.399 | 0.52 | 1 MS.Trt_vs_MS.NoTrt_F |
| CHSY1   | 0.01729 | -0.4264 | 0.255 | 0.36 | 1 MS.Trt_vs_MS.NoTrt_F |
| DDX18   | 0.01732 | 0.30988 | 0.694 | 0.8  | 1 MS.Trt_vs_MS.NoTrt_F |
| PTK2    | 0.01738 | 0.37576 | 0.914 | 0.96 | 1 MS.Trt_vs_MS.NoTrt_F |
| IKBKAP  | 0.0174  | -0.2918 | 0.259 | 0.35 | 1 MS.Trt_vs_MS.NoTrt_F |
| ETHE1   | 0.0174  | -0.3405 | 0.09  | 0.17 | 1 MS.Trt_vs_MS.NoTrt_F |
| MRPL17  | 0.01742 | 0.74801 | 0.09  | 0.17 | 1 MS.Trt_vs_MS.NoTrt_F |
| ZDHHC7  | 0.01743 | -0.3679 | 0.212 | 0.31 | 1 MS.Trt_vs_MS.NoTrt_F |
| TSTA3   | 0.01745 | 0.3789  | 0.162 | 0.27 | 1 MS.Trt_vs_MS.NoTrt_F |
| QSOX2   | 0.01747 | 0.27465 | 0.144 | 0.24 | 1 MS.Trt_vs_MS.NoTrt_F |
| MARS    | 0.01753 | -0.4945 | 0.414 | 0.5  | 1 MS.Trt_vs_MS.NoTrt_F |
| TMEM30A | 0.01762 | 0.41476 | 0.219 | 0.33 | 1 MS.Trt_vs_MS.NoTrt_F |
| DHX16   | 0.01762 | 0.36871 | 0.147 | 0.24 | 1 MS.Trt_vs_MS.NoTrt_F |
| CES2    | 0.01769 | 0.9083  | 0.309 | 0.43 | 1 MS.Trt_vs_MS.NoTrt_F |
| BIVM    | 0.01775 | 0.56298 | 0.309 | 0.44 | 1 MS.Trt_vs_MS.NoTrt_F |
| TARBP1  | 0.01775 | -0.9287 | 0.371 | 0.49 | 1 MS.Trt_vs_MS.NoTrt_F |
| ABHD13  | 0.01779 | -0.3212 | 0.112 | 0.19 | 1 MS.Trt_vs_MS.NoTrt_F |
| OGFR    | 0.01789 | -0.4494 | 0.201 | 0.3  | 1 MS.Trt_vs_MS.NoTrt_F |
| STXBP4  | 0.01794 | 0.43395 | 0.45  | 0.59 | 1 MS.Trt_vs_MS.NoTrt_F |
| ST8SIA6 | 0.01796 | 0.68545 | 0.367 | 0.49 | 1 MS.Trt_vs_MS.NoTrt_F |
| IDH1    | 0.01797 | -0.9368 | 0.216 | 0.32 | 1 MS.Trt_vs_MS.NoTrt_F |
| DAP3    | 0.01802 | -0.4699 | 0.903 | 0.93 | 1 MS.Trt_vs_MS.NoTrt_F |
| BACE1   | 0.01806 | 0.52473 | 0.536 | 0.7  | 1 MS.Trt_vs_MS.NoTrt_F |
| TMEM223 | 0.0181  | 0.30787 | 0.176 | 0.28 | 1 MS.Trt_vs_MS.NoTrt_F |
| ADPRHL1 | 0.01818 | -0.3569 | 0.277 | 0.38 | 1 MS.Trt_vs_MS.NoTrt_F |
| PTP4A3  | 0.01819 | 0.31656 | 0.09  | 0.17 | 1 MS.Trt_vs_MS.NoTrt_F |
| ARL17A  | 0.01825 | 0.2662  | 0.583 | 0.77 | 1 MS.Trt_vs_MS.NoTrt_F |
| BMF     | 0.01832 | 0.43729 | 0.101 | 0.18 | 1 MS.Trt_vs_MS.NoTrt_F |
| ZMYM6   | 0.01836 | 0.63708 | 0.824 | 0.79 | 1 MS.Trt_vs_MS.NoTrt_F |
| SULT2B1 | 0.01836 | -0.5968 | 0.464 | 0.6  | 1 MS.Trt_vs_MS.NoTrt_F |
| VWA5A   | 0.01839 | -0.311  | 0.086 | 0.16 | 1 MS.Trt_vs_MS.NoTrt_F |
| ULK4    | 0.01841 | -0.6216 | 0.291 | 0.4  | 1 MS.Trt_vs_MS.NoTrt_F |

|             |         |         |       |      |                        |
|-------------|---------|---------|-------|------|------------------------|
| COL6A3      | 0.01842 | 0.36987 | 0.396 | 0.54 | 1 MS.Trt_vs_MS.NoTrt_F |
| FBXO24      | 0.01843 | -0.3558 | 0.374 | 0.51 | 1 MS.Trt_vs_MS.NoTrt_F |
| CASP7       | 0.01843 | -1.737  | 0.169 | 0.26 | 1 MS.Trt_vs_MS.NoTrt_F |
| MEIS3       | 0.01847 | 1.28909 | 0.104 | 0.18 | 1 MS.Trt_vs_MS.NoTrt_F |
| ARL1        | 0.01848 | 0.29848 | 0.327 | 0.45 | 1 MS.Trt_vs_MS.NoTrt_F |
| USP21       | 0.01849 | -0.4656 | 0.137 | 0.23 | 1 MS.Trt_vs_MS.NoTrt_F |
| PRKACA      | 0.01849 | -0.3366 | 0.216 | 0.33 | 1 MS.Trt_vs_MS.NoTrt_F |
| C19orf12    | 0.01858 | -0.5305 | 0.363 | 0.48 | 1 MS.Trt_vs_MS.NoTrt_F |
| VASP        | 0.01862 | -0.4281 | 0.572 | 0.68 | 1 MS.Trt_vs_MS.NoTrt_F |
| PKIB        | 0.01862 | -0.3611 | 0.701 | 0.79 | 1 MS.Trt_vs_MS.NoTrt_F |
| EMILIN2     | 0.01864 | 0.99908 | 0.417 | 0.53 | 1 MS.Trt_vs_MS.NoTrt_F |
| PGGT1B      | 0.01869 | 0.87853 | 0.183 | 0.29 | 1 MS.Trt_vs_MS.NoTrt_F |
| MED14       | 0.01869 | 0.25391 | 0.162 | 0.27 | 1 MS.Trt_vs_MS.NoTrt_F |
| ELMOD2      | 0.01871 | 0.78385 | 0.097 | 0.18 | 1 MS.Trt_vs_MS.NoTrt_F |
| RANBP3      | 0.01871 | -0.4258 | 0.755 | 0.86 | 1 MS.Trt_vs_MS.NoTrt_F |
| SLC25A46    | 0.01871 | 0.64978 | 0.14  | 0.23 | 1 MS.Trt_vs_MS.NoTrt_F |
| MAN2A1      | 0.01874 | 0.29271 | 0.245 | 0.37 | 1 MS.Trt_vs_MS.NoTrt_F |
| ACTG2       | 0.01876 | -0.3728 | 0.259 | 0.35 | 1 MS.Trt_vs_MS.NoTrt_F |
| ZFAT        | 0.01886 | -1.0352 | 0.331 | 0.46 | 1 MS.Trt_vs_MS.NoTrt_F |
| SLC10A7     | 0.01891 | -0.7683 | 0.097 | 0.17 | 1 MS.Trt_vs_MS.NoTrt_F |
| ARMCX4      | 0.01891 | 0.49154 | 0.187 | 0.29 | 1 MS.Trt_vs_MS.NoTrt_F |
| SSR4        | 0.01894 | 0.7491  | 0.317 | 0.45 | 1 MS.Trt_vs_MS.NoTrt_F |
| CCR4        | 0.01905 | -0.2577 | 0.91  | 0.94 | 1 MS.Trt_vs_MS.NoTrt_F |
| KAT8        | 0.01907 | -0.5427 | 0.101 | 0.18 | 1 MS.Trt_vs_MS.NoTrt_F |
| GTF2A1      | 0.01909 | 0.31249 | 0.09  | 0.17 | 1 MS.Trt_vs_MS.NoTrt_F |
| SLC4A2      | 0.0191  | -0.5648 | 0.083 | 0.16 | 1 MS.Trt_vs_MS.NoTrt_F |
| GPN1        | 0.01913 | 0.39794 | 0.165 | 0.26 | 1 MS.Trt_vs_MS.NoTrt_F |
| TRRAP       | 0.01914 | 0.40601 | 0.14  | 0.24 | 1 MS.Trt_vs_MS.NoTrt_F |
| CPT1B       | 0.01923 | 0.27416 | 0.194 | 0.29 | 1 MS.Trt_vs_MS.NoTrt_F |
| LDOC1       | 0.01925 | 0.48636 | 0.09  | 0.17 | 1 MS.Trt_vs_MS.NoTrt_F |
| CALU        | 0.01926 | 0.38143 | 0.353 | 0.49 | 1 MS.Trt_vs_MS.NoTrt_F |
| EFCAB7      | 0.01935 | -0.4853 | 0.076 | 0.14 | 1 MS.Trt_vs_MS.NoTrt_F |
| SEC11A      | 0.0194  | -0.3262 | 0.766 | 0.88 | 1 MS.Trt_vs_MS.NoTrt_F |
| RPL39       | 0.01941 | 0.26655 | 0.597 | 0.89 | 1 MS.Trt_vs_MS.NoTrt_F |
| EHBP1L1     | 0.01942 | 0.87307 | 0.201 | 0.31 | 1 MS.Trt_vs_MS.NoTrt_F |
| ZC3H12B     | 0.01944 | 0.65571 | 0.504 | 0.62 | 1 MS.Trt_vs_MS.NoTrt_F |
| NCOA1       | 0.01949 | 0.63261 | 0.187 | 0.28 | 1 MS.Trt_vs_MS.NoTrt_F |
| RP11-47I22. | 0.01952 | -0.2904 | 0.478 | 0.61 | 1 MS.Trt_vs_MS.NoTrt_F |
| C3orf58     | 0.01954 | 0.45088 | 0.133 | 0.22 | 1 MS.Trt_vs_MS.NoTrt_F |
| MRPS33      | 0.01955 | -0.333  | 0.924 | 0.95 | 1 MS.Trt_vs_MS.NoTrt_F |

|            |         |         |       |      |   |                      |
|------------|---------|---------|-------|------|---|----------------------|
| RBBP9      | 0.01962 | -1.1163 | 0.378 | 0.5  | 1 | MS.Trt_vs_MS.NoTrt_F |
| TRIM58     | 0.01965 | 0.35617 | 0.662 | 0.61 | 1 | MS.Trt_vs_MS.NoTrt_F |
| IFFO2      | 0.01966 | -0.6151 | 0.165 | 0.25 | 1 | MS.Trt_vs_MS.NoTrt_F |
| ATP13A3    | 0.01974 | 0.49791 | 0.129 | 0.22 | 1 | MS.Trt_vs_MS.NoTrt_F |
| KATNA1     | 0.01981 | 0.8849  | 0.122 | 0.21 | 1 | MS.Trt_vs_MS.NoTrt_F |
| RBBP8      | 0.01992 | -0.2533 | 0.101 | 0.18 | 1 | MS.Trt_vs_MS.NoTrt_F |
| NVL        | 0.01992 | 0.53484 | 0.741 | 0.88 | 1 | MS.Trt_vs_MS.NoTrt_F |
| SETD4      | 0.01997 | 0.6437  | 0.511 | 0.61 | 1 | MS.Trt_vs_MS.NoTrt_F |
| RP11-613M: | 0.02003 | -0.3072 | 0.162 | 0.24 | 1 | MS.Trt_vs_MS.NoTrt_F |
| ALG12      | 0.02011 | -0.2548 | 0.155 | 0.25 | 1 | MS.Trt_vs_MS.NoTrt_F |
| PCDH9      | 0.02012 | -0.3142 | 0.669 | 0.75 | 1 | MS.Trt_vs_MS.NoTrt_F |
| MOB1A      | 0.02013 | 0.32951 | 0.82  | 0.91 | 1 | MS.Trt_vs_MS.NoTrt_F |
| ZNF232     | 0.02013 | -0.5792 | 0.065 | 0.13 | 1 | MS.Trt_vs_MS.NoTrt_F |
| LTB4R      | 0.02014 | -0.3008 | 0.349 | 0.45 | 1 | MS.Trt_vs_MS.NoTrt_F |
| ELL        | 0.02018 | 0.79014 | 0.162 | 0.27 | 1 | MS.Trt_vs_MS.NoTrt_F |
| IRAK4      | 0.02021 | -0.3495 | 0.579 | 0.68 | 1 | MS.Trt_vs_MS.NoTrt_F |
| NCLN       | 0.02026 | 0.27645 | 0.151 | 0.24 | 1 | MS.Trt_vs_MS.NoTrt_F |
| AEN        | 0.02028 | 0.39591 | 0.137 | 0.23 | 1 | MS.Trt_vs_MS.NoTrt_F |
| SLC15A3    | 0.02028 | -0.3077 | 0.076 | 0.14 | 1 | MS.Trt_vs_MS.NoTrt_F |
| UBE2N      | 0.02035 | 0.46578 | 0.536 | 0.66 | 1 | MS.Trt_vs_MS.NoTrt_F |
| GTF2H5     | 0.0204  | 0.30796 | 0.853 | 0.78 | 1 | MS.Trt_vs_MS.NoTrt_F |
| IGFLR1     | 0.02052 | 0.52898 | 0.543 | 0.71 | 1 | MS.Trt_vs_MS.NoTrt_F |
| TMEM2      | 0.02055 | 0.27167 | 0.608 | 0.71 | 1 | MS.Trt_vs_MS.NoTrt_F |
| CCNYL1     | 0.02059 | 0.41789 | 0.353 | 0.5  | 1 | MS.Trt_vs_MS.NoTrt_F |
| FBXL15     | 0.0206  | 0.51393 | 0.144 | 0.24 | 1 | MS.Trt_vs_MS.NoTrt_F |
| CDR2       | 0.02068 | 0.31451 | 0.147 | 0.24 | 1 | MS.Trt_vs_MS.NoTrt_F |
| ZC3H7B     | 0.02068 | -0.6064 | 0.766 | 0.83 | 1 | MS.Trt_vs_MS.NoTrt_F |
| FXR1       | 0.0207  | 0.38957 | 0.205 | 0.31 | 1 | MS.Trt_vs_MS.NoTrt_F |
| WHSC1      | 0.02074 | 0.31766 | 0.683 | 0.74 | 1 | MS.Trt_vs_MS.NoTrt_F |
| OTUB1      | 0.02077 | 0.37028 | 0.881 | 0.98 | 1 | MS.Trt_vs_MS.NoTrt_F |
| IDI1       | 0.02079 | 0.62342 | 0.212 | 0.33 | 1 | MS.Trt_vs_MS.NoTrt_F |
| CASZ1      | 0.02085 | -0.8162 | 0.255 | 0.36 | 1 | MS.Trt_vs_MS.NoTrt_F |
| NISCH      | 0.021   | 0.25833 | 0.399 | 0.49 | 1 | MS.Trt_vs_MS.NoTrt_F |
| ZNF197     | 0.02102 | -0.3028 | 0.471 | 0.59 | 1 | MS.Trt_vs_MS.NoTrt_F |
| C9orf72    | 0.02103 | 0.72179 | 0.169 | 0.27 | 1 | MS.Trt_vs_MS.NoTrt_F |
| ATXN1L     | 0.02103 | -0.5812 | 0.097 | 0.17 | 1 | MS.Trt_vs_MS.NoTrt_F |
| DYNLRB1    | 0.02108 | 0.43263 | 0.198 | 0.31 | 1 | MS.Trt_vs_MS.NoTrt_F |
| DCTPP1     | 0.0211  | 0.40369 | 0.112 | 0.19 | 1 | MS.Trt_vs_MS.NoTrt_F |
| TMEM8A     | 0.02117 | 0.29931 | 0.076 | 0.14 | 1 | MS.Trt_vs_MS.NoTrt_F |
| CEP55      | 0.02122 | -0.6461 | 0.14  | 0.23 | 1 | MS.Trt_vs_MS.NoTrt_F |

|            |         |         |       |      |   |                      |
|------------|---------|---------|-------|------|---|----------------------|
| CRACR2A    | 0.02122 | -0.2821 | 0.629 | 0.71 | 1 | MS.Trt_vs_MS.NoTrt_F |
| SLC2A8     | 0.02123 | -1.368  | 0.266 | 0.38 | 1 | MS.Trt_vs_MS.NoTrt_F |
| HARS2      | 0.02124 | 0.82185 | 0.129 | 0.22 | 1 | MS.Trt_vs_MS.NoTrt_F |
| SPRED3     | 0.02125 | 0.29193 | 0.676 | 0.62 | 1 | MS.Trt_vs_MS.NoTrt_F |
| CLUL1      | 0.02126 | -0.3945 | 0.09  | 0.16 | 1 | MS.Trt_vs_MS.NoTrt_F |
| ACADS      | 0.02127 | 0.36813 | 0.112 | 0.19 | 1 | MS.Trt_vs_MS.NoTrt_F |
| HIST1H1C   | 0.0213  | 0.53261 | 0.129 | 0.22 | 1 | MS.Trt_vs_MS.NoTrt_F |
| CCDC126    | 0.02131 | 0.62474 | 0.104 | 0.18 | 1 | MS.Trt_vs_MS.NoTrt_F |
| USP11      | 0.02133 | -0.3466 | 0.191 | 0.29 | 1 | MS.Trt_vs_MS.NoTrt_F |
| FNTA       | 0.02134 | -0.3216 | 0.824 | 0.91 | 1 | MS.Trt_vs_MS.NoTrt_F |
| TNXB       | 0.02135 | 0.31141 | 0.104 | 0.18 | 1 | MS.Trt_vs_MS.NoTrt_F |
| SCAND1     | 0.02136 | 0.43509 | 0.187 | 0.29 | 1 | MS.Trt_vs_MS.NoTrt_F |
| USP30      | 0.02141 | -0.4928 | 0.302 | 0.38 | 1 | MS.Trt_vs_MS.NoTrt_F |
| SEMA6A     | 0.02142 | -0.4944 | 0.065 | 0.13 | 1 | MS.Trt_vs_MS.NoTrt_F |
| CHMP6      | 0.02142 | 0.39272 | 0.122 | 0.21 | 1 | MS.Trt_vs_MS.NoTrt_F |
| TRANK1     | 0.02142 | -0.3005 | 0.216 | 0.32 | 1 | MS.Trt_vs_MS.NoTrt_F |
| RP11-507K1 | 0.02143 | 0.32898 | 0.068 | 0.13 | 1 | MS.Trt_vs_MS.NoTrt_F |
| FAM199X    | 0.02153 | 0.81596 | 0.072 | 0.14 | 1 | MS.Trt_vs_MS.NoTrt_F |
| HIST1H4C   | 0.02155 | 0.74863 | 0.331 | 0.51 | 1 | MS.Trt_vs_MS.NoTrt_F |
| DNTTIP1    | 0.02155 | 0.7968  | 0.079 | 0.15 | 1 | MS.Trt_vs_MS.NoTrt_F |
| BAZ2A      | 0.02156 | 0.44063 | 0.594 | 0.71 | 1 | MS.Trt_vs_MS.NoTrt_F |
| LMOD3      | 0.02157 | -0.6072 | 0.403 | 0.51 | 1 | MS.Trt_vs_MS.NoTrt_F |
| PELP1      | 0.02158 | -0.3643 | 0.263 | 0.36 | 1 | MS.Trt_vs_MS.NoTrt_F |
| GPATCH4    | 0.0216  | 0.56613 | 0.248 | 0.35 | 1 | MS.Trt_vs_MS.NoTrt_F |
| RPF1       | 0.02162 | 0.45851 | 0.245 | 0.35 | 1 | MS.Trt_vs_MS.NoTrt_F |
| SAMM50     | 0.02166 | 0.33125 | 0.453 | 0.56 | 1 | MS.Trt_vs_MS.NoTrt_F |
| GZMA       | 0.02167 | 0.56978 | 0.112 | 0.19 | 1 | MS.Trt_vs_MS.NoTrt_F |
| CDK17      | 0.02167 | 0.7208  | 0.198 | 0.31 | 1 | MS.Trt_vs_MS.NoTrt_F |
| GOSR2      | 0.02168 | 0.7618  | 0.129 | 0.22 | 1 | MS.Trt_vs_MS.NoTrt_F |
| SLC5A3     | 0.02169 | 0.4968  | 0.126 | 0.21 | 1 | MS.Trt_vs_MS.NoTrt_F |
| WNT10A     | 0.02173 | 0.36023 | 0.162 | 0.25 | 1 | MS.Trt_vs_MS.NoTrt_F |
| LOXL1      | 0.02174 | 0.28086 | 0.086 | 0.16 | 1 | MS.Trt_vs_MS.NoTrt_F |
| TBX19      | 0.02176 | 0.37824 | 0.09  | 0.16 | 1 | MS.Trt_vs_MS.NoTrt_F |
| MAP4K3     | 0.02177 | -0.9514 | 0.068 | 0.13 | 1 | MS.Trt_vs_MS.NoTrt_F |
| MEN1       | 0.02178 | -1.0492 | 0.094 | 0.17 | 1 | MS.Trt_vs_MS.NoTrt_F |
| MAP3K7CL   | 0.02179 | -0.5956 | 0.424 | 0.53 | 1 | MS.Trt_vs_MS.NoTrt_F |
| APOBEC3C   | 0.02181 | 0.75744 | 0.788 | 0.85 | 1 | MS.Trt_vs_MS.NoTrt_F |
| MSL1       | 0.02183 | 0.47914 | 0.525 | 0.66 | 1 | MS.Trt_vs_MS.NoTrt_F |
| PDCD2      | 0.02184 | 0.66607 | 0.119 | 0.2  | 1 | MS.Trt_vs_MS.NoTrt_F |
| COASY      | 0.02184 | -0.6538 | 0.442 | 0.53 | 1 | MS.Trt_vs_MS.NoTrt_F |

|            |         |         |       |      |                        |
|------------|---------|---------|-------|------|------------------------|
| MLLT3      | 0.02186 | 0.27463 | 0.371 | 0.5  | 1 MS.Trt_vs_MS.NoTrt_F |
| DCTN6      | 0.02191 | -0.2883 | 0.511 | 0.62 | 1 MS.Trt_vs_MS.NoTrt_F |
| VRK1       | 0.02191 | -0.6806 | 0.201 | 0.28 | 1 MS.Trt_vs_MS.NoTrt_F |
| XKR6       | 0.02191 | 0.3471  | 0.079 | 0.15 | 1 MS.Trt_vs_MS.NoTrt_F |
| PPIL2      | 0.02191 | 0.2985  | 0.392 | 0.49 | 1 MS.Trt_vs_MS.NoTrt_F |
| CCDC12     | 0.02196 | 0.25274 | 0.281 | 0.4  | 1 MS.Trt_vs_MS.NoTrt_F |
| EIF2AK3    | 0.02207 | 1.262   | 0.079 | 0.15 | 1 MS.Trt_vs_MS.NoTrt_F |
| IFIT5      | 0.02208 | 0.99641 | 0.083 | 0.16 | 1 MS.Trt_vs_MS.NoTrt_F |
| AL356053.1 | 0.02214 | -0.6549 | 0.061 | 0.12 | 1 MS.Trt_vs_MS.NoTrt_F |
| ADCK1      | 0.02216 | -1.4668 | 0.234 | 0.33 | 1 MS.Trt_vs_MS.NoTrt_F |
| MELK       | 0.02217 | 0.47701 | 0.586 | 0.53 | 1 MS.Trt_vs_MS.NoTrt_F |
| ANKRD6     | 0.02218 | -0.4291 | 0.14  | 0.22 | 1 MS.Trt_vs_MS.NoTrt_F |
| SREBF2     | 0.02219 | 0.52254 | 0.165 | 0.27 | 1 MS.Trt_vs_MS.NoTrt_F |
| CYP2D6     | 0.0223  | -0.7091 | 0.076 | 0.14 | 1 MS.Trt_vs_MS.NoTrt_F |
| EPS8L2     | 0.02239 | -0.3436 | 0.065 | 0.13 | 1 MS.Trt_vs_MS.NoTrt_F |
| CD226      | 0.02241 | -0.67   | 0.518 | 0.61 | 1 MS.Trt_vs_MS.NoTrt_F |
| GSPT2      | 0.02245 | 0.34641 | 0.072 | 0.14 | 1 MS.Trt_vs_MS.NoTrt_F |
| SLC39A13   | 0.02246 | 0.78885 | 0.14  | 0.23 | 1 MS.Trt_vs_MS.NoTrt_F |
| ARV1       | 0.0225  | -0.6808 | 0.277 | 0.39 | 1 MS.Trt_vs_MS.NoTrt_F |
| CNNM2      | 0.02251 | 0.47307 | 0.317 | 0.43 | 1 MS.Trt_vs_MS.NoTrt_F |
| CALCOCO2   | 0.02252 | -0.327  | 0.982 | 1    | 1 MS.Trt_vs_MS.NoTrt_F |
| CHD4       | 0.02256 | 0.34358 | 0.536 | 0.66 | 1 MS.Trt_vs_MS.NoTrt_F |
| MRPL22     | 0.02259 | 0.59409 | 0.212 | 0.32 | 1 MS.Trt_vs_MS.NoTrt_F |
| FUCA1      | 0.02261 | 0.62108 | 0.079 | 0.15 | 1 MS.Trt_vs_MS.NoTrt_F |
| PACS2      | 0.02264 | 0.66966 | 0.248 | 0.35 | 1 MS.Trt_vs_MS.NoTrt_F |
| ZC3HC1     | 0.02266 | 0.37907 | 0.414 | 0.56 | 1 MS.Trt_vs_MS.NoTrt_F |
| NDUFB3     | 0.02272 | 0.80406 | 0.216 | 0.34 | 1 MS.Trt_vs_MS.NoTrt_F |
| EIF4G1     | 0.02273 | -0.7094 | 0.482 | 0.58 | 1 MS.Trt_vs_MS.NoTrt_F |
| ARHGEF39   | 0.02278 | -0.54   | 0.622 | 0.76 | 1 MS.Trt_vs_MS.NoTrt_F |
| ASB7       | 0.02278 | 0.82652 | 0.097 | 0.17 | 1 MS.Trt_vs_MS.NoTrt_F |
| SET        | 0.02279 | 0.72599 | 0.874 | 0.96 | 1 MS.Trt_vs_MS.NoTrt_F |
| ADAM28     | 0.02282 | 1.27062 | 0.144 | 0.23 | 1 MS.Trt_vs_MS.NoTrt_F |
| SCOC       | 0.02298 | 0.58318 | 0.112 | 0.19 | 1 MS.Trt_vs_MS.NoTrt_F |
| CCDC120    | 0.02299 | 0.26541 | 0.507 | 0.65 | 1 MS.Trt_vs_MS.NoTrt_F |
| VNN3       | 0.023   | 0.64013 | 0.32  | 0.47 | 1 MS.Trt_vs_MS.NoTrt_F |
| MAP3K9     | 0.02306 | 0.58158 | 0.424 | 0.54 | 1 MS.Trt_vs_MS.NoTrt_F |
| ZNF432     | 0.02312 | -0.9542 | 0.622 | 0.7  | 1 MS.Trt_vs_MS.NoTrt_F |
| NDUFAF5    | 0.02312 | -0.4926 | 0.478 | 0.6  | 1 MS.Trt_vs_MS.NoTrt_F |
| HERC6      | 0.02314 | 0.43169 | 0.302 | 0.4  | 1 MS.Trt_vs_MS.NoTrt_F |
| TMPPE      | 0.02315 | 0.43731 | 0.072 | 0.14 | 1 MS.Trt_vs_MS.NoTrt_F |

|            |         |         |       |      |   |                      |
|------------|---------|---------|-------|------|---|----------------------|
| CNOT6L     | 0.02317 | 0.67341 | 0.241 | 0.35 | 1 | MS.Trt_vs_MS.NoTrt_F |
| ARMCX6     | 0.02318 | 0.30992 | 0.079 | 0.15 | 1 | MS.Trt_vs_MS.NoTrt_F |
| DISP1      | 0.02318 | -0.7052 | 0.097 | 0.17 | 1 | MS.Trt_vs_MS.NoTrt_F |
| ARL5A      | 0.0232  | 0.66904 | 0.173 | 0.28 | 1 | MS.Trt_vs_MS.NoTrt_F |
| ZFP3       | 0.02322 | -1.3607 | 0.115 | 0.19 | 1 | MS.Trt_vs_MS.NoTrt_F |
| C9orf78    | 0.02323 | -0.2867 | 0.964 | 0.98 | 1 | MS.Trt_vs_MS.NoTrt_F |
| LZTR1      | 0.02324 | -0.5468 | 0.252 | 0.34 | 1 | MS.Trt_vs_MS.NoTrt_F |
| URI1       | 0.02331 | 0.32209 | 0.187 | 0.29 | 1 | MS.Trt_vs_MS.NoTrt_F |
| MRPL44     | 0.02332 | -0.7371 | 0.529 | 0.64 | 1 | MS.Trt_vs_MS.NoTrt_F |
| CD59       | 0.02334 | -0.4174 | 0.655 | 0.79 | 1 | MS.Trt_vs_MS.NoTrt_F |
| ATXN7L3    | 0.02337 | 0.99958 | 0.076 | 0.14 | 1 | MS.Trt_vs_MS.NoTrt_F |
| MRPL2      | 0.02337 | 0.33122 | 0.288 | 0.4  | 1 | MS.Trt_vs_MS.NoTrt_F |
| ZHX2       | 0.02359 | 0.54757 | 0.137 | 0.23 | 1 | MS.Trt_vs_MS.NoTrt_F |
| NUDT14     | 0.0236  | 0.56396 | 0.428 | 0.54 | 1 | MS.Trt_vs_MS.NoTrt_F |
| SLC25A43   | 0.02362 | -0.2656 | 0.219 | 0.31 | 1 | MS.Trt_vs_MS.NoTrt_F |
| ATPAF2     | 0.02363 | 0.28989 | 0.439 | 0.56 | 1 | MS.Trt_vs_MS.NoTrt_F |
| NSFL1C     | 0.02363 | 0.54586 | 0.155 | 0.25 | 1 | MS.Trt_vs_MS.NoTrt_F |
| ITGAL      | 0.02365 | 0.27691 | 0.752 | 0.84 | 1 | MS.Trt_vs_MS.NoTrt_F |
| HSF5       | 0.02368 | -0.2745 | 0.09  | 0.16 | 1 | MS.Trt_vs_MS.NoTrt_F |
| HIKESHI    | 0.02368 | 0.30571 | 0.442 | 0.57 | 1 | MS.Trt_vs_MS.NoTrt_F |
| SESN1      | 0.02369 | 0.73781 | 0.183 | 0.29 | 1 | MS.Trt_vs_MS.NoTrt_F |
| ZNF48      | 0.02374 | -0.5322 | 0.058 | 0.12 | 1 | MS.Trt_vs_MS.NoTrt_F |
| TTC33      | 0.02388 | 0.28094 | 0.259 | 0.36 | 1 | MS.Trt_vs_MS.NoTrt_F |
| ZNF10      | 0.024   | 1.08885 | 0.126 | 0.21 | 1 | MS.Trt_vs_MS.NoTrt_F |
| HINT2      | 0.02407 | 0.71848 | 0.101 | 0.18 | 1 | MS.Trt_vs_MS.NoTrt_F |
| MED19      | 0.0242  | 0.25717 | 0.086 | 0.16 | 1 | MS.Trt_vs_MS.NoTrt_F |
| DDX10      | 0.02422 | -0.7917 | 0.658 | 0.75 | 1 | MS.Trt_vs_MS.NoTrt_F |
| NBPF1      | 0.02435 | 0.25717 | 0.219 | 0.33 | 1 | MS.Trt_vs_MS.NoTrt_F |
| GEMIN5     | 0.02438 | -2.2503 | 0.05  | 0.11 | 1 | MS.Trt_vs_MS.NoTrt_F |
| BRAF       | 0.0244  | 0.37937 | 0.147 | 0.24 | 1 | MS.Trt_vs_MS.NoTrt_F |
| SPECC1L-AD | 0.02446 | -1.148  | 0.187 | 0.28 | 1 | MS.Trt_vs_MS.NoTrt_F |
| CLP1       | 0.02447 | -1.3381 | 0.05  | 0.11 | 1 | MS.Trt_vs_MS.NoTrt_F |
| OSBPL9     | 0.02451 | -0.5229 | 0.309 | 0.41 | 1 | MS.Trt_vs_MS.NoTrt_F |
| BAHD1      | 0.02455 | 0.79769 | 0.072 | 0.14 | 1 | MS.Trt_vs_MS.NoTrt_F |
| IDNK       | 0.02456 | -0.3793 | 0.367 | 0.48 | 1 | MS.Trt_vs_MS.NoTrt_F |
| HARS       | 0.02457 | 0.28833 | 0.871 | 0.87 | 1 | MS.Trt_vs_MS.NoTrt_F |
| AASDHPPT   | 0.02462 | 0.4914  | 0.205 | 0.31 | 1 | MS.Trt_vs_MS.NoTrt_F |
| FEM1B      | 0.02463 | -0.5941 | 0.09  | 0.16 | 1 | MS.Trt_vs_MS.NoTrt_F |
| ERLIN1     | 0.02463 | -1.8533 | 0.054 | 0.11 | 1 | MS.Trt_vs_MS.NoTrt_F |
| FANCM      | 0.02463 | -0.6268 | 0.104 | 0.18 | 1 | MS.Trt_vs_MS.NoTrt_F |

|             |         |         |       |      |   |                      |
|-------------|---------|---------|-------|------|---|----------------------|
| ZFYVE1      | 0.02466 | -0.3212 | 0.108 | 0.18 | 1 | MS.Trt_vs_MS.NoTrt_F |
| RP11-449H3  | 0.02469 | -0.9919 | 0.234 | 0.33 | 1 | MS.Trt_vs_MS.NoTrt_F |
| PEX14       | 0.02482 | -0.5469 | 0.119 | 0.19 | 1 | MS.Trt_vs_MS.NoTrt_F |
| PARBPB      | 0.02484 | 0.59105 | 0.338 | 0.45 | 1 | MS.Trt_vs_MS.NoTrt_F |
| ATP5J2-PTCI | 0.02487 | -0.5081 | 0.058 | 0.12 | 1 | MS.Trt_vs_MS.NoTrt_F |
| KYAT1       | 0.02488 | 0.50801 | 0.162 | 0.25 | 1 | MS.Trt_vs_MS.NoTrt_F |
| TOMM34      | 0.02491 | 0.8242  | 0.083 | 0.16 | 1 | MS.Trt_vs_MS.NoTrt_F |
| MRPL45      | 0.025   | -0.5422 | 0.076 | 0.14 | 1 | MS.Trt_vs_MS.NoTrt_F |
| TMEM184B    | 0.02502 | -0.5384 | 0.09  | 0.16 | 1 | MS.Trt_vs_MS.NoTrt_F |
| SOCS4       | 0.02514 | -0.4267 | 0.299 | 0.41 | 1 | MS.Trt_vs_MS.NoTrt_F |
| LRTOMT      | 0.02521 | 0.50641 | 0.849 | 0.83 | 1 | MS.Trt_vs_MS.NoTrt_F |
| FAM45A      | 0.02521 | -0.476  | 0.673 | 0.76 | 1 | MS.Trt_vs_MS.NoTrt_F |
| BCDIN3D     | 0.02523 | -1.5482 | 0.385 | 0.46 | 1 | MS.Trt_vs_MS.NoTrt_F |
| SCRIB       | 0.02523 | -0.4501 | 0.054 | 0.11 | 1 | MS.Trt_vs_MS.NoTrt_F |
| MMRN2       | 0.02527 | -0.4126 | 0.162 | 0.26 | 1 | MS.Trt_vs_MS.NoTrt_F |
| IP6K1       | 0.02529 | 0.45069 | 0.151 | 0.24 | 1 | MS.Trt_vs_MS.NoTrt_F |
| MRPS34      | 0.02532 | 0.66071 | 0.18  | 0.29 | 1 | MS.Trt_vs_MS.NoTrt_F |
| WDR60       | 0.0255  | 0.4163  | 0.144 | 0.23 | 1 | MS.Trt_vs_MS.NoTrt_F |
| YDJC        | 0.02553 | 0.38461 | 0.162 | 0.26 | 1 | MS.Trt_vs_MS.NoTrt_F |
| CCDC86      | 0.02554 | 0.56567 | 0.068 | 0.13 | 1 | MS.Trt_vs_MS.NoTrt_F |
| TRMT61B     | 0.02572 | 1.11367 | 0.129 | 0.22 | 1 | MS.Trt_vs_MS.NoTrt_F |
| KLF11       | 0.02572 | -0.3631 | 0.054 | 0.11 | 1 | MS.Trt_vs_MS.NoTrt_F |
| FKBP4       | 0.02574 | -0.4021 | 0.108 | 0.18 | 1 | MS.Trt_vs_MS.NoTrt_F |
| MON2        | 0.02577 | 0.52428 | 0.36  | 0.49 | 1 | MS.Trt_vs_MS.NoTrt_F |
| FAM185A     | 0.02578 | -0.8371 | 0.126 | 0.2  | 1 | MS.Trt_vs_MS.NoTrt_F |
| C7          | 0.02582 | -0.3618 | 0.381 | 0.51 | 1 | MS.Trt_vs_MS.NoTrt_F |
| CCDC146     | 0.02582 | -0.7162 | 0.09  | 0.16 | 1 | MS.Trt_vs_MS.NoTrt_F |
| SLC35A1     | 0.02589 | 0.30744 | 0.137 | 0.22 | 1 | MS.Trt_vs_MS.NoTrt_F |
| CCDC69      | 0.02597 | -0.6082 | 0.827 | 0.88 | 1 | MS.Trt_vs_MS.NoTrt_F |
| EVA1C       | 0.02599 | -0.4939 | 0.144 | 0.23 | 1 | MS.Trt_vs_MS.NoTrt_F |
| SLC9B2      | 0.026   | 0.69078 | 0.079 | 0.15 | 1 | MS.Trt_vs_MS.NoTrt_F |
| MAMLD1      | 0.02604 | 0.99473 | 0.187 | 0.29 | 1 | MS.Trt_vs_MS.NoTrt_F |
| USP31       | 0.02607 | 0.84783 | 0.112 | 0.19 | 1 | MS.Trt_vs_MS.NoTrt_F |
| NR4A1       | 0.02608 | 0.88826 | 0.435 | 0.57 | 1 | MS.Trt_vs_MS.NoTrt_F |
| PPTC7       | 0.02615 | -0.2755 | 0.094 | 0.17 | 1 | MS.Trt_vs_MS.NoTrt_F |
| ABCD3       | 0.02619 | -0.4414 | 0.144 | 0.23 | 1 | MS.Trt_vs_MS.NoTrt_F |
| CNTROB      | 0.02631 | -0.4864 | 0.201 | 0.29 | 1 | MS.Trt_vs_MS.NoTrt_F |
| ZNF235      | 0.02636 | 0.31503 | 0.133 | 0.22 | 1 | MS.Trt_vs_MS.NoTrt_F |
| DDIT4       | 0.0264  | 0.34192 | 0.342 | 0.5  | 1 | MS.Trt_vs_MS.NoTrt_F |
| RNF207      | 0.02641 | 0.7633  | 0.737 | 0.7  | 1 | MS.Trt_vs_MS.NoTrt_F |



|          |         |         |       |      |   |                      |
|----------|---------|---------|-------|------|---|----------------------|
| FZR1     | 0.02644 | -0.3703 | 0.129 | 0.22 | 1 | MS.Trt_vs_MS.NoTrt_F |
| ZNF335   | 0.02645 | -0.4241 | 0.331 | 0.41 | 1 | MS.Trt_vs_MS.NoTrt_F |
| DYRK2    | 0.02645 | 0.91141 | 0.155 | 0.25 | 1 | MS.Trt_vs_MS.NoTrt_F |
| RAB33A   | 0.02648 | 0.53155 | 0.097 | 0.17 | 1 | MS.Trt_vs_MS.NoTrt_F |
| SETD1A   | 0.02652 | 1.03983 | 0.068 | 0.13 | 1 | MS.Trt_vs_MS.NoTrt_F |
| SLC26A11 | 0.0266  | -0.4955 | 0.597 | 0.72 | 1 | MS.Trt_vs_MS.NoTrt_F |
| ZFAND1   | 0.02661 | 0.74758 | 0.14  | 0.23 | 1 | MS.Trt_vs_MS.NoTrt_F |
| LIN52    | 0.02665 | 0.6958  | 0.676 | 0.78 | 1 | MS.Trt_vs_MS.NoTrt_F |
| DHX40    | 0.02668 | 0.92519 | 0.122 | 0.2  | 1 | MS.Trt_vs_MS.NoTrt_F |
| FBXO31   | 0.02677 | -0.3733 | 0.335 | 0.44 | 1 | MS.Trt_vs_MS.NoTrt_F |
| SUCLA2   | 0.02679 | 0.49468 | 0.126 | 0.21 | 1 | MS.Trt_vs_MS.NoTrt_F |
| ICOSLG   | 0.02687 | -0.4602 | 0.709 | 0.85 | 1 | MS.Trt_vs_MS.NoTrt_F |
| PRIMPOL  | 0.02691 | -0.3379 | 0.112 | 0.19 | 1 | MS.Trt_vs_MS.NoTrt_F |
| RFX3     | 0.02704 | -0.4877 | 0.187 | 0.28 | 1 | MS.Trt_vs_MS.NoTrt_F |
| L3MBTL4  | 0.02705 | -0.7966 | 0.432 | 0.59 | 1 | MS.Trt_vs_MS.NoTrt_F |
| SEC23IP  | 0.02712 | -0.4543 | 0.385 | 0.5  | 1 | MS.Trt_vs_MS.NoTrt_F |
| CISD2    | 0.02721 | 0.64533 | 0.446 | 0.55 | 1 | MS.Trt_vs_MS.NoTrt_F |
| IL17RA   | 0.02721 | -0.3261 | 0.658 | 0.76 | 1 | MS.Trt_vs_MS.NoTrt_F |
| PYGB     | 0.02725 | 0.42616 | 0.144 | 0.23 | 1 | MS.Trt_vs_MS.NoTrt_F |
| PABPC1L  | 0.0273  | -0.3682 | 0.288 | 0.39 | 1 | MS.Trt_vs_MS.NoTrt_F |
| KDM1B    | 0.02734 | -0.807  | 0.086 | 0.16 | 1 | MS.Trt_vs_MS.NoTrt_F |
| OSBP     | 0.02736 | 0.26665 | 0.09  | 0.16 | 1 | MS.Trt_vs_MS.NoTrt_F |
| CRADD    | 0.0275  | 0.41125 | 0.094 | 0.17 | 1 | MS.Trt_vs_MS.NoTrt_F |
| TRIM11   | 0.02754 | -0.6106 | 0.554 | 0.64 | 1 | MS.Trt_vs_MS.NoTrt_F |
| ACOT13   | 0.02755 | -0.6361 | 0.374 | 0.46 | 1 | MS.Trt_vs_MS.NoTrt_F |
| EDA      | 0.02755 | -0.6303 | 0.367 | 0.48 | 1 | MS.Trt_vs_MS.NoTrt_F |
| KCNMB3   | 0.02757 | 0.42663 | 0.378 | 0.47 | 1 | MS.Trt_vs_MS.NoTrt_F |
| AGA      | 0.0276  | 0.33025 | 0.137 | 0.22 | 1 | MS.Trt_vs_MS.NoTrt_F |
| CLDN11   | 0.02764 | 0.57945 | 0.568 | 0.69 | 1 | MS.Trt_vs_MS.NoTrt_F |
| CENPP    | 0.02769 | -0.5971 | 0.05  | 0.11 | 1 | MS.Trt_vs_MS.NoTrt_F |
| TMPRSS13 | 0.0277  | 1.04501 | 0.162 | 0.24 | 1 | MS.Trt_vs_MS.NoTrt_F |
| KTI12    | 0.02786 | 0.32775 | 0.09  | 0.16 | 1 | MS.Trt_vs_MS.NoTrt_F |
| THTPA    | 0.02789 | 0.41461 | 0.115 | 0.19 | 1 | MS.Trt_vs_MS.NoTrt_F |
| MYDGF    | 0.02789 | 0.4906  | 0.162 | 0.26 | 1 | MS.Trt_vs_MS.NoTrt_F |
| RNF215   | 0.02791 | -0.6309 | 0.468 | 0.54 | 1 | MS.Trt_vs_MS.NoTrt_F |
| ZNF181   | 0.02795 | -0.4573 | 0.169 | 0.27 | 1 | MS.Trt_vs_MS.NoTrt_F |
| PML      | 0.02803 | -0.3842 | 0.601 | 0.73 | 1 | MS.Trt_vs_MS.NoTrt_F |
| COX8A    | 0.02803 | 0.63447 | 0.23  | 0.36 | 1 | MS.Trt_vs_MS.NoTrt_F |
| FICD     | 0.02822 | 0.31439 | 0.083 | 0.15 | 1 | MS.Trt_vs_MS.NoTrt_F |
| ATG7     | 0.02831 | 0.26187 | 0.536 | 0.69 | 1 | MS.Trt_vs_MS.NoTrt_F |

|          |         |         |       |      |   |                      |
|----------|---------|---------|-------|------|---|----------------------|
| ATP13A2  | 0.02831 | 0.2805  | 0.421 | 0.53 | 1 | MS.Trt_vs_MS.NoTrt_F |
| GPR68    | 0.02838 | 0.52003 | 0.133 | 0.22 | 1 | MS.Trt_vs_MS.NoTrt_F |
| CEPT1    | 0.02847 | 0.42436 | 0.338 | 0.45 | 1 | MS.Trt_vs_MS.NoTrt_F |
| IFT57    | 0.02849 | 0.38665 | 0.112 | 0.19 | 1 | MS.Trt_vs_MS.NoTrt_F |
| POLR1E   | 0.02852 | 0.71034 | 0.129 | 0.21 | 1 | MS.Trt_vs_MS.NoTrt_F |
| STK32C   | 0.02853 | -0.5916 | 0.072 | 0.13 | 1 | MS.Trt_vs_MS.NoTrt_F |
| SACS     | 0.02858 | -0.2807 | 0.108 | 0.18 | 1 | MS.Trt_vs_MS.NoTrt_F |
| SNRPG    | 0.02858 | 0.70523 | 0.313 | 0.45 | 1 | MS.Trt_vs_MS.NoTrt_F |
| RAPGEF6  | 0.0286  | -0.4707 | 0.442 | 0.55 | 1 | MS.Trt_vs_MS.NoTrt_F |
| RPS26    | 0.02865 | 0.44722 | 0.691 | 0.77 | 1 | MS.Trt_vs_MS.NoTrt_F |
| C10orf54 | 0.0287  | 0.35077 | 0.338 | 0.49 | 1 | MS.Trt_vs_MS.NoTrt_F |
| SLC25A24 | 0.02897 | 0.50597 | 0.133 | 0.22 | 1 | MS.Trt_vs_MS.NoTrt_F |
| AP3M1    | 0.02899 | -0.311  | 0.468 | 0.55 | 1 | MS.Trt_vs_MS.NoTrt_F |
| NOL6     | 0.02899 | 0.90876 | 0.381 | 0.5  | 1 | MS.Trt_vs_MS.NoTrt_F |
| NRG4     | 0.02907 | -0.4368 | 0.586 | 0.7  | 1 | MS.Trt_vs_MS.NoTrt_F |
| ZNF180   | 0.0291  | 1.04966 | 0.353 | 0.43 | 1 | MS.Trt_vs_MS.NoTrt_F |
| IRF2BP2  | 0.02921 | 0.38291 | 0.216 | 0.32 | 1 | MS.Trt_vs_MS.NoTrt_F |
| CSE1L    | 0.02921 | 0.31546 | 0.223 | 0.33 | 1 | MS.Trt_vs_MS.NoTrt_F |
| GFER     | 0.02922 | 0.423   | 0.083 | 0.15 | 1 | MS.Trt_vs_MS.NoTrt_F |
| ARFGAP3  | 0.02926 | -0.2835 | 0.327 | 0.43 | 1 | MS.Trt_vs_MS.NoTrt_F |
| HLA-DMB  | 0.02928 | -1.1508 | 0.101 | 0.17 | 1 | MS.Trt_vs_MS.NoTrt_F |
| THSD4    | 0.02939 | 0.2812  | 0.324 | 0.44 | 1 | MS.Trt_vs_MS.NoTrt_F |
| CNKSR1   | 0.02939 | -0.6048 | 0.173 | 0.26 | 1 | MS.Trt_vs_MS.NoTrt_F |
| TXN2     | 0.02943 | 0.44063 | 0.273 | 0.38 | 1 | MS.Trt_vs_MS.NoTrt_F |
| GLIPR1   | 0.02946 | 0.34755 | 0.309 | 0.43 | 1 | MS.Trt_vs_MS.NoTrt_F |
| INTS1    | 0.02946 | -0.5757 | 0.367 | 0.46 | 1 | MS.Trt_vs_MS.NoTrt_F |
| DCBLD2   | 0.02946 | 0.40731 | 0.64  | 0.77 | 1 | MS.Trt_vs_MS.NoTrt_F |
| UBXN6    | 0.02946 | 0.93975 | 0.101 | 0.18 | 1 | MS.Trt_vs_MS.NoTrt_F |
| NHSL2    | 0.02952 | 0.31094 | 0.633 | 0.74 | 1 | MS.Trt_vs_MS.NoTrt_F |
| BHLHB9   | 0.02954 | 0.4948  | 0.345 | 0.48 | 1 | MS.Trt_vs_MS.NoTrt_F |
| PLA2G6   | 0.02962 | -0.4239 | 0.428 | 0.52 | 1 | MS.Trt_vs_MS.NoTrt_F |
| CCDC24   | 0.02964 | 0.39302 | 0.745 | 0.66 | 1 | MS.Trt_vs_MS.NoTrt_F |
| MFSD14B  | 0.02966 | 0.51032 | 0.122 | 0.2  | 1 | MS.Trt_vs_MS.NoTrt_F |
| TUSC2    | 0.02969 | 0.28691 | 0.115 | 0.19 | 1 | MS.Trt_vs_MS.NoTrt_F |
| ADRB2    | 0.02973 | 0.88376 | 0.205 | 0.31 | 1 | MS.Trt_vs_MS.NoTrt_F |
| ABCC9    | 0.02978 | 0.34352 | 0.924 | 0.96 | 1 | MS.Trt_vs_MS.NoTrt_F |
| HAUS4    | 0.02979 | 0.91741 | 0.147 | 0.24 | 1 | MS.Trt_vs_MS.NoTrt_F |
| FBXO48   | 0.02984 | -0.5884 | 0.655 | 0.8  | 1 | MS.Trt_vs_MS.NoTrt_F |
| ELOVL6   | 0.02986 | 0.43577 | 0.342 | 0.45 | 1 | MS.Trt_vs_MS.NoTrt_F |
| FIGNL1   | 0.0299  | 0.26478 | 0.151 | 0.23 | 1 | MS.Trt_vs_MS.NoTrt_F |

|            |         |         |       |      |   |                      |
|------------|---------|---------|-------|------|---|----------------------|
| HACL1      | 0.02993 | 0.4571  | 0.137 | 0.22 | 1 | MS.Trt_vs_MS.NoTrt_F |
| EXOSC8     | 0.02995 | -0.6069 | 0.518 | 0.56 | 1 | MS.Trt_vs_MS.NoTrt_F |
| ZNF616     | 0.02996 | 0.2767  | 0.665 | 0.83 | 1 | MS.Trt_vs_MS.NoTrt_F |
| BTD        | 0.03    | 0.4935  | 0.097 | 0.17 | 1 | MS.Trt_vs_MS.NoTrt_F |
| TPRG1L     | 0.03001 | -0.8055 | 0.255 | 0.34 | 1 | MS.Trt_vs_MS.NoTrt_F |
| FLNB       | 0.03002 | 0.50592 | 0.353 | 0.43 | 1 | MS.Trt_vs_MS.NoTrt_F |
| AIFM2      | 0.03019 | 1.03527 | 0.371 | 0.49 | 1 | MS.Trt_vs_MS.NoTrt_F |
| SMG6       | 0.03029 | -0.6016 | 0.237 | 0.33 | 1 | MS.Trt_vs_MS.NoTrt_F |
| BAZ2B      | 0.0303  | -0.8906 | 0.806 | 0.87 | 1 | MS.Trt_vs_MS.NoTrt_F |
| XRCC4      | 0.03032 | 0.33071 | 0.079 | 0.14 | 1 | MS.Trt_vs_MS.NoTrt_F |
| ROCK2      | 0.03036 | -0.4479 | 0.464 | 0.59 | 1 | MS.Trt_vs_MS.NoTrt_F |
| IFI44L     | 0.03039 | 2.11549 | 0.209 | 0.32 | 1 | MS.Trt_vs_MS.NoTrt_F |
| C8orf33    | 0.03048 | 0.87359 | 0.245 | 0.37 | 1 | MS.Trt_vs_MS.NoTrt_F |
| RUSC1      | 0.0305  | 0.55947 | 0.083 | 0.15 | 1 | MS.Trt_vs_MS.NoTrt_F |
| ENOSF1     | 0.03051 | 0.3626  | 0.813 | 0.9  | 1 | MS.Trt_vs_MS.NoTrt_F |
| NOL11      | 0.03063 | 0.47044 | 0.475 | 0.56 | 1 | MS.Trt_vs_MS.NoTrt_F |
| ANKAR      | 0.03072 | -0.3543 | 0.137 | 0.22 | 1 | MS.Trt_vs_MS.NoTrt_F |
| BTBD2      | 0.03078 | 0.68072 | 0.345 | 0.44 | 1 | MS.Trt_vs_MS.NoTrt_F |
| SOCS5      | 0.03079 | 0.36977 | 0.09  | 0.16 | 1 | MS.Trt_vs_MS.NoTrt_F |
| ALS2       | 0.03084 | -0.4219 | 0.403 | 0.52 | 1 | MS.Trt_vs_MS.NoTrt_F |
| ZNF799     | 0.03089 | 1.48124 | 0.367 | 0.48 | 1 | MS.Trt_vs_MS.NoTrt_F |
| INSIG2     | 0.03096 | 0.84965 | 0.144 | 0.24 | 1 | MS.Trt_vs_MS.NoTrt_F |
| TMED1      | 0.03109 | -0.4404 | 0.083 | 0.15 | 1 | MS.Trt_vs_MS.NoTrt_F |
| FOPNL      | 0.03114 | -0.3036 | 0.561 | 0.64 | 1 | MS.Trt_vs_MS.NoTrt_F |
| AP000275.6 | 0.03123 | 0.35972 | 0.094 | 0.17 | 1 | MS.Trt_vs_MS.NoTrt_F |
| HECTD3     | 0.03125 | 0.31577 | 0.151 | 0.24 | 1 | MS.Trt_vs_MS.NoTrt_F |
| CYP4F8     | 0.03128 | 0.32829 | 0.827 | 0.8  | 1 | MS.Trt_vs_MS.NoTrt_F |
| GALK2      | 0.03137 | -0.4691 | 0.892 | 0.94 | 1 | MS.Trt_vs_MS.NoTrt_F |
| TCF4       | 0.03139 | 0.29969 | 0.669 | 0.76 | 1 | MS.Trt_vs_MS.NoTrt_F |
| C9orf84    | 0.03145 | -0.7193 | 0.072 | 0.13 | 1 | MS.Trt_vs_MS.NoTrt_F |
| STARD6     | 0.03145 | 0.52159 | 0.129 | 0.2  | 1 | MS.Trt_vs_MS.NoTrt_F |
| CYP4V2     | 0.03145 | -0.327  | 0.752 | 0.82 | 1 | MS.Trt_vs_MS.NoTrt_F |
| FAM58A     | 0.03148 | 0.59494 | 0.09  | 0.16 | 1 | MS.Trt_vs_MS.NoTrt_F |
| MRPL27     | 0.0315  | 0.49302 | 0.176 | 0.27 | 1 | MS.Trt_vs_MS.NoTrt_F |
| NDUFB5     | 0.0315  | -0.3056 | 0.691 | 0.75 | 1 | MS.Trt_vs_MS.NoTrt_F |
| NIFK       | 0.03159 | -0.5369 | 0.496 | 0.59 | 1 | MS.Trt_vs_MS.NoTrt_F |
| MCFD2      | 0.0316  | 0.34363 | 0.824 | 0.95 | 1 | MS.Trt_vs_MS.NoTrt_F |
| TFPT       | 0.03167 | 0.54557 | 0.112 | 0.19 | 1 | MS.Trt_vs_MS.NoTrt_F |
| TRPM1      | 0.03172 | -0.4348 | 0.112 | 0.18 | 1 | MS.Trt_vs_MS.NoTrt_F |
| FMNL1      | 0.03178 | 0.33587 | 0.683 | 0.85 | 1 | MS.Trt_vs_MS.NoTrt_F |

|         |         |         |       |      |                        |
|---------|---------|---------|-------|------|------------------------|
| ENG     | 0.03179 | 0.61233 | 0.076 | 0.14 | 1 MS.Trt_vs_MS.NoTrt_F |
| ZMIZ2   | 0.03183 | 0.51388 | 0.183 | 0.28 | 1 MS.Trt_vs_MS.NoTrt_F |
| MRPL32  | 0.03195 | 0.51683 | 0.18  | 0.28 | 1 MS.Trt_vs_MS.NoTrt_F |
| DENND1B | 0.03195 | -0.5051 | 0.162 | 0.25 | 1 MS.Trt_vs_MS.NoTrt_F |
| PHACTR4 | 0.03207 | 0.39807 | 0.95  | 0.98 | 1 MS.Trt_vs_MS.NoTrt_F |
| UBASH3B | 0.03215 | -0.5735 | 0.421 | 0.51 | 1 MS.Trt_vs_MS.NoTrt_F |
| SNX8    | 0.03215 | -0.3934 | 0.14  | 0.22 | 1 MS.Trt_vs_MS.NoTrt_F |
| STIL    | 0.03219 | -0.7697 | 0.554 | 0.63 | 1 MS.Trt_vs_MS.NoTrt_F |
| RNF146  | 0.0322  | 0.69385 | 0.126 | 0.21 | 1 MS.Trt_vs_MS.NoTrt_F |
| STX1A   | 0.03235 | -1.2833 | 0.065 | 0.12 | 1 MS.Trt_vs_MS.NoTrt_F |
| SKAP2   | 0.03236 | -0.3101 | 0.219 | 0.31 | 1 MS.Trt_vs_MS.NoTrt_F |
| LYRM9   | 0.03238 | -0.3611 | 0.176 | 0.27 | 1 MS.Trt_vs_MS.NoTrt_F |
| COPS9   | 0.03243 | 0.79206 | 0.187 | 0.29 | 1 MS.Trt_vs_MS.NoTrt_F |
| DPY19L4 | 0.03256 | -1.0599 | 0.525 | 0.62 | 1 MS.Trt_vs_MS.NoTrt_F |
| ELAVL1  | 0.03257 | 0.4524  | 0.964 | 0.97 | 1 MS.Trt_vs_MS.NoTrt_F |
| F5      | 0.03266 | 0.72012 | 0.198 | 0.3  | 1 MS.Trt_vs_MS.NoTrt_F |
| GPR65   | 0.03268 | 0.86282 | 0.273 | 0.37 | 1 MS.Trt_vs_MS.NoTrt_F |
| SSFA2   | 0.03271 | -1.0694 | 0.144 | 0.22 | 1 MS.Trt_vs_MS.NoTrt_F |
| ATG4C   | 0.03275 | 0.31168 | 0.072 | 0.13 | 1 MS.Trt_vs_MS.NoTrt_F |
| RIMS2   | 0.03287 | 0.2736  | 0.917 | 0.92 | 1 MS.Trt_vs_MS.NoTrt_F |
| NUTM2G  | 0.03291 | 0.26133 | 0.076 | 0.14 | 1 MS.Trt_vs_MS.NoTrt_F |
| OSBPL7  | 0.03295 | 0.34183 | 0.09  | 0.16 | 1 MS.Trt_vs_MS.NoTrt_F |
| GLCC1   | 0.03295 | -0.3849 | 0.266 | 0.36 | 1 MS.Trt_vs_MS.NoTrt_F |
| GLCE    | 0.03299 | -0.6206 | 0.155 | 0.23 | 1 MS.Trt_vs_MS.NoTrt_F |
| FUNDC1  | 0.03304 | -0.3983 | 0.076 | 0.14 | 1 MS.Trt_vs_MS.NoTrt_F |
| CXCR2   | 0.03305 | 0.72452 | 0.302 | 0.38 | 1 MS.Trt_vs_MS.NoTrt_F |
| ARID2   | 0.03306 | 0.27335 | 0.694 | 0.81 | 1 MS.Trt_vs_MS.NoTrt_F |
| ENPP3   | 0.03325 | 1.25171 | 0.122 | 0.2  | 1 MS.Trt_vs_MS.NoTrt_F |
| FHL1    | 0.03331 | -0.5266 | 0.072 | 0.13 | 1 MS.Trt_vs_MS.NoTrt_F |
| PIK3CA  | 0.03336 | -0.275  | 0.072 | 0.13 | 1 MS.Trt_vs_MS.NoTrt_F |
| JOSD2   | 0.0334  | 0.28909 | 0.108 | 0.18 | 1 MS.Trt_vs_MS.NoTrt_F |
| CYB5R4  | 0.03343 | -0.3782 | 0.888 | 0.95 | 1 MS.Trt_vs_MS.NoTrt_F |
| BCKDHB  | 0.0335  | -0.5103 | 0.568 | 0.65 | 1 MS.Trt_vs_MS.NoTrt_F |
| MMAB    | 0.03351 | -0.6891 | 0.64  | 0.71 | 1 MS.Trt_vs_MS.NoTrt_F |
| ATP6AP1 | 0.03356 | -0.3916 | 0.464 | 0.54 | 1 MS.Trt_vs_MS.NoTrt_F |
| CHGB    | 0.03359 | -0.562  | 0.399 | 0.49 | 1 MS.Trt_vs_MS.NoTrt_F |
| MANBAL  | 0.03361 | -1.362  | 0.083 | 0.14 | 1 MS.Trt_vs_MS.NoTrt_F |
| DHPS    | 0.03362 | 0.42325 | 0.284 | 0.39 | 1 MS.Trt_vs_MS.NoTrt_F |
| PARP3   | 0.03368 | -1.2609 | 0.076 | 0.14 | 1 MS.Trt_vs_MS.NoTrt_F |
| MKS1    | 0.03371 | 0.60552 | 0.079 | 0.14 | 1 MS.Trt_vs_MS.NoTrt_F |

|            |         |         |       |      |                        |
|------------|---------|---------|-------|------|------------------------|
| SEC61G     | 0.03381 | 0.41558 | 0.32  | 0.42 | 1 MS.Trt_vs_MS.NoTrt_F |
| KIDINS220  | 0.03389 | 0.25659 | 0.255 | 0.35 | 1 MS.Trt_vs_MS.NoTrt_F |
| PLCD1      | 0.03393 | 1.30375 | 0.097 | 0.17 | 1 MS.Trt_vs_MS.NoTrt_F |
| ERI1       | 0.03393 | 0.30478 | 0.428 | 0.54 | 1 MS.Trt_vs_MS.NoTrt_F |
| RTN2       | 0.03397 | 0.3393  | 0.345 | 0.26 | 1 MS.Trt_vs_MS.NoTrt_F |
| MTMR1      | 0.034   | 0.7985  | 0.18  | 0.27 | 1 MS.Trt_vs_MS.NoTrt_F |
| SREBF1     | 0.03406 | -0.6064 | 0.068 | 0.13 | 1 MS.Trt_vs_MS.NoTrt_F |
| BRD1       | 0.03419 | 0.84538 | 0.115 | 0.19 | 1 MS.Trt_vs_MS.NoTrt_F |
| NDUFC2     | 0.0343  | 0.46426 | 0.572 | 0.67 | 1 MS.Trt_vs_MS.NoTrt_F |
| FAM102B    | 0.03434 | 0.34492 | 0.223 | 0.32 | 1 MS.Trt_vs_MS.NoTrt_F |
| PXK        | 0.03434 | 0.84412 | 0.119 | 0.2  | 1 MS.Trt_vs_MS.NoTrt_F |
| COX17      | 0.03435 | 0.37271 | 0.317 | 0.43 | 1 MS.Trt_vs_MS.NoTrt_F |
| ZNF821     | 0.03437 | 0.78727 | 0.086 | 0.16 | 1 MS.Trt_vs_MS.NoTrt_F |
| PKN2       | 0.03441 | 1.22963 | 0.313 | 0.43 | 1 MS.Trt_vs_MS.NoTrt_F |
| CRAT       | 0.03443 | -0.458  | 0.068 | 0.13 | 1 MS.Trt_vs_MS.NoTrt_F |
| GPM6B      | 0.03453 | 0.47845 | 0.129 | 0.21 | 1 MS.Trt_vs_MS.NoTrt_F |
| WDR55      | 0.03455 | -0.3506 | 0.676 | 0.76 | 1 MS.Trt_vs_MS.NoTrt_F |
| PLCH2      | 0.03456 | 1.23596 | 0.083 | 0.15 | 1 MS.Trt_vs_MS.NoTrt_F |
| FCHSD1     | 0.03473 | 0.29992 | 0.299 | 0.43 | 1 MS.Trt_vs_MS.NoTrt_F |
| KIF21B     | 0.03475 | 0.41892 | 0.432 | 0.55 | 1 MS.Trt_vs_MS.NoTrt_F |
| ATP11C     | 0.03479 | 0.68155 | 0.072 | 0.13 | 1 MS.Trt_vs_MS.NoTrt_F |
| ZNF362     | 0.03493 | 0.65207 | 0.147 | 0.23 | 1 MS.Trt_vs_MS.NoTrt_F |
| DDX42      | 0.03495 | 0.29417 | 0.378 | 0.49 | 1 MS.Trt_vs_MS.NoTrt_F |
| STK24      | 0.03495 | 0.6552  | 0.288 | 0.41 | 1 MS.Trt_vs_MS.NoTrt_F |
| DBNDD2     | 0.03498 | -0.5183 | 0.065 | 0.12 | 1 MS.Trt_vs_MS.NoTrt_F |
| HDAC1      | 0.03498 | 0.29173 | 0.288 | 0.41 | 1 MS.Trt_vs_MS.NoTrt_F |
| CDC42SE1   | 0.03507 | -0.4956 | 0.511 | 0.57 | 1 MS.Trt_vs_MS.NoTrt_F |
| FSD1L      | 0.03511 | -0.4752 | 0.191 | 0.27 | 1 MS.Trt_vs_MS.NoTrt_F |
| CTD-2568A1 | 0.03521 | -0.2504 | 0.388 | 0.47 | 1 MS.Trt_vs_MS.NoTrt_F |
| PHRF1      | 0.03523 | 0.54264 | 0.158 | 0.25 | 1 MS.Trt_vs_MS.NoTrt_F |
| SRR        | 0.03536 | 1.75542 | 0.068 | 0.13 | 1 MS.Trt_vs_MS.NoTrt_F |
| FAM92A1    | 0.03556 | -0.2795 | 0.27  | 0.39 | 1 MS.Trt_vs_MS.NoTrt_F |
| ODF3B      | 0.03557 | -0.3122 | 0.068 | 0.13 | 1 MS.Trt_vs_MS.NoTrt_F |
| PSMB3      | 0.03557 | 0.2617  | 0.302 | 0.44 | 1 MS.Trt_vs_MS.NoTrt_F |
| CDC16      | 0.03562 | 0.78824 | 0.18  | 0.27 | 1 MS.Trt_vs_MS.NoTrt_F |
| CAPZA1     | 0.03564 | 0.73096 | 0.856 | 0.97 | 1 MS.Trt_vs_MS.NoTrt_F |
| MTHFD2     | 0.03566 | -0.7148 | 0.683 | 0.75 | 1 MS.Trt_vs_MS.NoTrt_F |
| NIPAL3     | 0.0358  | 0.25716 | 0.755 | 0.83 | 1 MS.Trt_vs_MS.NoTrt_F |
| TNFRSF10D  | 0.03587 | 0.33135 | 0.133 | 0.21 | 1 MS.Trt_vs_MS.NoTrt_F |
| TRMT1L     | 0.03597 | 0.37846 | 0.101 | 0.17 | 1 MS.Trt_vs_MS.NoTrt_F |

|          |         |         |       |      |   |                      |
|----------|---------|---------|-------|------|---|----------------------|
| ZXDB     | 0.03607 | 0.4398  | 0.072 | 0.13 | 1 | MS.Trt_vs_MS.NoTrt_F |
| PDZD7    | 0.03607 | -0.3044 | 0.41  | 0.54 | 1 | MS.Trt_vs_MS.NoTrt_F |
| FAM120A  | 0.03612 | 0.69343 | 0.162 | 0.25 | 1 | MS.Trt_vs_MS.NoTrt_F |
| DDX20    | 0.03624 | 1.07514 | 0.101 | 0.17 | 1 | MS.Trt_vs_MS.NoTrt_F |
| PDLIM7   | 0.03642 | -0.5297 | 0.068 | 0.13 | 1 | MS.Trt_vs_MS.NoTrt_F |
| ZNF707   | 0.03647 | 0.4003  | 0.727 | 0.79 | 1 | MS.Trt_vs_MS.NoTrt_F |
| GFM2     | 0.03693 | -0.9729 | 0.259 | 0.34 | 1 | MS.Trt_vs_MS.NoTrt_F |
| ALG11    | 0.03693 | 0.49009 | 0.813 | 0.89 | 1 | MS.Trt_vs_MS.NoTrt_F |
| C3orf18  | 0.03694 | 0.41615 | 0.266 | 0.35 | 1 | MS.Trt_vs_MS.NoTrt_F |
| UNC50    | 0.03698 | 0.65617 | 0.126 | 0.2  | 1 | MS.Trt_vs_MS.NoTrt_F |
| SLC25A34 | 0.03701 | 0.77205 | 0.554 | 0.67 | 1 | MS.Trt_vs_MS.NoTrt_F |
| CRYBG3   | 0.03705 | 0.80614 | 0.097 | 0.17 | 1 | MS.Trt_vs_MS.NoTrt_F |
| TSPAN4   | 0.03706 | -0.7413 | 0.058 | 0.11 | 1 | MS.Trt_vs_MS.NoTrt_F |
| APOBEC2  | 0.03709 | 0.74081 | 0.076 | 0.14 | 1 | MS.Trt_vs_MS.NoTrt_F |
| IER2     | 0.0371  | 0.33424 | 0.381 | 0.55 | 1 | MS.Trt_vs_MS.NoTrt_F |
| ZNF211   | 0.03715 | 0.95552 | 0.205 | 0.3  | 1 | MS.Trt_vs_MS.NoTrt_F |
| NLGN3    | 0.03731 | 0.4304  | 0.086 | 0.15 | 1 | MS.Trt_vs_MS.NoTrt_F |
| SNRNP48  | 0.03734 | -0.9475 | 0.223 | 0.3  | 1 | MS.Trt_vs_MS.NoTrt_F |
| SRPK2    | 0.03745 | 0.29225 | 0.317 | 0.44 | 1 | MS.Trt_vs_MS.NoTrt_F |
| CCT3     | 0.03746 | -0.313  | 0.547 | 0.63 | 1 | MS.Trt_vs_MS.NoTrt_F |
| SLC25A29 | 0.03746 | -0.4576 | 0.353 | 0.45 | 1 | MS.Trt_vs_MS.NoTrt_F |
| DUS3L    | 0.03758 | 0.90486 | 0.151 | 0.24 | 1 | MS.Trt_vs_MS.NoTrt_F |
| NDUFS4   | 0.0376  | 0.88385 | 0.302 | 0.4  | 1 | MS.Trt_vs_MS.NoTrt_F |
| FAM83G   | 0.03769 | 0.44003 | 0.41  | 0.52 | 1 | MS.Trt_vs_MS.NoTrt_F |
| BLVRB    | 0.0377  | 0.55709 | 0.414 | 0.31 | 1 | MS.Trt_vs_MS.NoTrt_F |
| GOLPH3L  | 0.03774 | -0.3762 | 0.201 | 0.28 | 1 | MS.Trt_vs_MS.NoTrt_F |
| NR3C1    | 0.03779 | 0.35921 | 0.209 | 0.3  | 1 | MS.Trt_vs_MS.NoTrt_F |
| CD320    | 0.03788 | 0.69702 | 0.662 | 0.8  | 1 | MS.Trt_vs_MS.NoTrt_F |
| BCO2     | 0.03789 | -0.3109 | 0.511 | 0.58 | 1 | MS.Trt_vs_MS.NoTrt_F |
| KDELRL1  | 0.03791 | -0.2963 | 0.252 | 0.35 | 1 | MS.Trt_vs_MS.NoTrt_F |
| MTA2     | 0.03796 | -1.1555 | 0.302 | 0.43 | 1 | MS.Trt_vs_MS.NoTrt_F |
| GSDMB    | 0.03801 | 0.4995  | 0.899 | 0.91 | 1 | MS.Trt_vs_MS.NoTrt_F |
| TSEN15   | 0.03803 | 0.55705 | 0.209 | 0.31 | 1 | MS.Trt_vs_MS.NoTrt_F |
| HLA-DRA  | 0.03804 | 0.3091  | 0.173 | 0.26 | 1 | MS.Trt_vs_MS.NoTrt_F |
| ALS2CL   | 0.03823 | 0.2676  | 0.151 | 0.23 | 1 | MS.Trt_vs_MS.NoTrt_F |
| GPX7     | 0.03832 | 0.50358 | 0.09  | 0.16 | 1 | MS.Trt_vs_MS.NoTrt_F |
| MAPKBP1  | 0.03833 | 0.42168 | 0.414 | 0.51 | 1 | MS.Trt_vs_MS.NoTrt_F |
| KLHL12   | 0.03839 | 0.45787 | 0.108 | 0.18 | 1 | MS.Trt_vs_MS.NoTrt_F |
| HABP4    | 0.03844 | 0.97784 | 0.165 | 0.24 | 1 | MS.Trt_vs_MS.NoTrt_F |
| ZNF492   | 0.0385  | 0.3262  | 0.622 | 0.5  | 1 | MS.Trt_vs_MS.NoTrt_F |

|            |         |         |       |      |                        |
|------------|---------|---------|-------|------|------------------------|
| ZNF571     | 0.03856 | -0.5229 | 0.41  | 0.54 | 1 MS.Trt_vs_MS.NoTrt_F |
| NPHS1      | 0.03858 | 0.28464 | 0.464 | 0.4  | 1 MS.Trt_vs_MS.NoTrt_F |
| PNN        | 0.03878 | 0.54307 | 0.252 | 0.37 | 1 MS.Trt_vs_MS.NoTrt_F |
| ANKEF1     | 0.03884 | -0.3568 | 0.201 | 0.29 | 1 MS.Trt_vs_MS.NoTrt_F |
| PPIL4      | 0.03886 | 0.41947 | 0.234 | 0.34 | 1 MS.Trt_vs_MS.NoTrt_F |
| PRDX5      | 0.03887 | 0.52686 | 0.245 | 0.36 | 1 MS.Trt_vs_MS.NoTrt_F |
| FAM219B    | 0.03893 | 0.85655 | 0.421 | 0.53 | 1 MS.Trt_vs_MS.NoTrt_F |
| C11orf71   | 0.03895 | 0.96532 | 0.094 | 0.16 | 1 MS.Trt_vs_MS.NoTrt_F |
| RNPEPL1    | 0.03898 | 0.91171 | 0.162 | 0.26 | 1 MS.Trt_vs_MS.NoTrt_F |
| TGDS       | 0.03904 | 0.42645 | 0.119 | 0.19 | 1 MS.Trt_vs_MS.NoTrt_F |
| CCDC153    | 0.0391  | 1.28956 | 0.245 | 0.35 | 1 MS.Trt_vs_MS.NoTrt_F |
| TMEM5      | 0.03915 | 1.25046 | 0.496 | 0.6  | 1 MS.Trt_vs_MS.NoTrt_F |
| LYRM7      | 0.03917 | 0.48909 | 0.917 | 0.9  | 1 MS.Trt_vs_MS.NoTrt_F |
| NRP1       | 0.03917 | 0.90424 | 0.302 | 0.41 | 1 MS.Trt_vs_MS.NoTrt_F |
| PILRB      | 0.03926 | 0.43597 | 0.45  | 0.54 | 1 MS.Trt_vs_MS.NoTrt_F |
| OSGEP      | 0.03931 | -0.4145 | 0.576 | 0.68 | 1 MS.Trt_vs_MS.NoTrt_F |
| SF3B6      | 0.03939 | 0.49217 | 0.198 | 0.3  | 1 MS.Trt_vs_MS.NoTrt_F |
| RBAK       | 0.03957 | -1.6884 | 0.054 | 0.11 | 1 MS.Trt_vs_MS.NoTrt_F |
| ZSCAN16    | 0.03977 | 0.48592 | 0.065 | 0.12 | 1 MS.Trt_vs_MS.NoTrt_F |
| SMAD9      | 0.03985 | 0.70698 | 0.331 | 0.44 | 1 MS.Trt_vs_MS.NoTrt_F |
| UBXN8      | 0.03991 | 0.73263 | 0.198 | 0.28 | 1 MS.Trt_vs_MS.NoTrt_F |
| IFITM2     | 0.03997 | 0.65777 | 0.849 | 0.81 | 1 MS.Trt_vs_MS.NoTrt_F |
| TFB2M      | 0.03998 | 1.30173 | 0.079 | 0.14 | 1 MS.Trt_vs_MS.NoTrt_F |
| ZMYM1      | 0.04001 | 0.4567  | 0.547 | 0.66 | 1 MS.Trt_vs_MS.NoTrt_F |
| CCZ1       | 0.04001 | -0.8721 | 0.673 | 0.77 | 1 MS.Trt_vs_MS.NoTrt_F |
| ISOC2      | 0.04002 | 0.40783 | 0.068 | 0.13 | 1 MS.Trt_vs_MS.NoTrt_F |
| AC013461.1 | 0.04004 | 0.57891 | 0.831 | 0.77 | 1 MS.Trt_vs_MS.NoTrt_F |
| RP11-234B2 | 0.04005 | -0.3008 | 0.058 | 0.11 | 1 MS.Trt_vs_MS.NoTrt_F |
| STX6       | 0.04005 | 0.26704 | 0.367 | 0.46 | 1 MS.Trt_vs_MS.NoTrt_F |
| LRRC56     | 0.04006 | -0.5007 | 0.525 | 0.38 | 1 MS.Trt_vs_MS.NoTrt_F |
| CBWD7      | 0.04012 | 0.34975 | 0.478 | 0.59 | 1 MS.Trt_vs_MS.NoTrt_F |
| ARMC1      | 0.0402  | 0.53727 | 0.144 | 0.22 | 1 MS.Trt_vs_MS.NoTrt_F |
| LUC7L3     | 0.04023 | 0.29108 | 0.529 | 0.7  | 1 MS.Trt_vs_MS.NoTrt_F |
| ISG20      | 0.04023 | 0.26527 | 0.612 | 0.67 | 1 MS.Trt_vs_MS.NoTrt_F |
| ANAPC15    | 0.04024 | 0.35572 | 0.763 | 0.85 | 1 MS.Trt_vs_MS.NoTrt_F |
| TICAM1     | 0.04028 | -0.479  | 0.09  | 0.16 | 1 MS.Trt_vs_MS.NoTrt_F |
| TMEM167B   | 0.04042 | -0.6065 | 0.773 | 0.82 | 1 MS.Trt_vs_MS.NoTrt_F |
| RPS21      | 0.04048 | 0.48408 | 0.435 | 0.64 | 1 MS.Trt_vs_MS.NoTrt_F |
| ZNF790     | 0.04049 | -0.2572 | 0.468 | 0.6  | 1 MS.Trt_vs_MS.NoTrt_F |
| PLEKHA4    | 0.04049 | -0.3193 | 0.086 | 0.15 | 1 MS.Trt_vs_MS.NoTrt_F |

|          |         |         |       |      |   |                      |
|----------|---------|---------|-------|------|---|----------------------|
| SPCS1    | 0.04049 | 0.28489 | 0.903 | 0.93 | 1 | MS.Trt_vs_MS.NoTrt_F |
| EMP1     | 0.0405  | 0.61423 | 0.162 | 0.25 | 1 | MS.Trt_vs_MS.NoTrt_F |
| C12orf29 | 0.04052 | 0.42902 | 0.223 | 0.32 | 1 | MS.Trt_vs_MS.NoTrt_F |
| STON1    | 0.04054 | -0.9005 | 0.335 | 0.43 | 1 | MS.Trt_vs_MS.NoTrt_F |
| TOP3B    | 0.04055 | 0.32618 | 0.151 | 0.24 | 1 | MS.Trt_vs_MS.NoTrt_F |
| MTBP     | 0.0406  | -0.6714 | 0.55  | 0.64 | 1 | MS.Trt_vs_MS.NoTrt_F |
| BNIP1    | 0.04069 | 1.46392 | 0.104 | 0.18 | 1 | MS.Trt_vs_MS.NoTrt_F |
| RAB15    | 0.04083 | 0.83489 | 0.058 | 0.11 | 1 | MS.Trt_vs_MS.NoTrt_F |
| KIF1B    | 0.04096 | -0.7892 | 0.741 | 0.84 | 1 | MS.Trt_vs_MS.NoTrt_F |
| TMEM38A  | 0.04097 | 0.2659  | 0.601 | 0.49 | 1 | MS.Trt_vs_MS.NoTrt_F |
| POP1     | 0.04099 | -0.2539 | 0.061 | 0.12 | 1 | MS.Trt_vs_MS.NoTrt_F |
| CUL4B    | 0.041   | 0.67259 | 0.129 | 0.2  | 1 | MS.Trt_vs_MS.NoTrt_F |
| PRH1     | 0.04104 | 0.37467 | 0.115 | 0.19 | 1 | MS.Trt_vs_MS.NoTrt_F |
| CDK5     | 0.04115 | 0.35698 | 0.065 | 0.12 | 1 | MS.Trt_vs_MS.NoTrt_F |
| DHX30    | 0.04116 | -0.5023 | 0.633 | 0.69 | 1 | MS.Trt_vs_MS.NoTrt_F |
| TMEM209  | 0.04131 | 0.40345 | 0.752 | 0.81 | 1 | MS.Trt_vs_MS.NoTrt_F |
| ALKBH8   | 0.0414  | -0.5444 | 0.054 | 0.11 | 1 | MS.Trt_vs_MS.NoTrt_F |
| SLC38A9  | 0.04153 | 0.95459 | 0.331 | 0.45 | 1 | MS.Trt_vs_MS.NoTrt_F |
| MINPP1   | 0.04162 | -0.9367 | 0.097 | 0.16 | 1 | MS.Trt_vs_MS.NoTrt_F |
| PPME1    | 0.04165 | 0.32097 | 0.144 | 0.22 | 1 | MS.Trt_vs_MS.NoTrt_F |
| CBX4     | 0.04167 | -0.3944 | 0.083 | 0.14 | 1 | MS.Trt_vs_MS.NoTrt_F |
| ZBTB38   | 0.04167 | -0.2529 | 0.59  | 0.7  | 1 | MS.Trt_vs_MS.NoTrt_F |
| BMP8A    | 0.04174 | -0.5354 | 0.601 | 0.71 | 1 | MS.Trt_vs_MS.NoTrt_F |
| FRMD5    | 0.04175 | 0.33243 | 0.061 | 0.12 | 1 | MS.Trt_vs_MS.NoTrt_F |
| MMD      | 0.04177 | 0.32005 | 0.09  | 0.16 | 1 | MS.Trt_vs_MS.NoTrt_F |
| ADCK5    | 0.04182 | 0.64161 | 0.086 | 0.15 | 1 | MS.Trt_vs_MS.NoTrt_F |
| HAGH     | 0.04186 | -0.3739 | 0.741 | 0.79 | 1 | MS.Trt_vs_MS.NoTrt_F |
| MTHFSD   | 0.04204 | -0.509  | 0.09  | 0.16 | 1 | MS.Trt_vs_MS.NoTrt_F |
| BUB1     | 0.04206 | -0.5656 | 0.054 | 0.11 | 1 | MS.Trt_vs_MS.NoTrt_F |
| SLC39A9  | 0.04215 | -0.31   | 0.191 | 0.28 | 1 | MS.Trt_vs_MS.NoTrt_F |
| ZUFSP    | 0.0422  | 0.65165 | 0.09  | 0.16 | 1 | MS.Trt_vs_MS.NoTrt_F |
| BNIP3L   | 0.0422  | 0.4672  | 0.187 | 0.28 | 1 | MS.Trt_vs_MS.NoTrt_F |
| MAP7D1   | 0.04227 | -0.3843 | 0.46  | 0.58 | 1 | MS.Trt_vs_MS.NoTrt_F |
| SEC22A   | 0.04234 | 0.30966 | 0.637 | 0.74 | 1 | MS.Trt_vs_MS.NoTrt_F |
| GABRP    | 0.04237 | 0.36773 | 0.259 | 0.38 | 1 | MS.Trt_vs_MS.NoTrt_F |
| CKS2     | 0.0424  | -0.3493 | 0.076 | 0.13 | 1 | MS.Trt_vs_MS.NoTrt_F |
| COMT     | 0.0424  | 0.32205 | 0.381 | 0.5  | 1 | MS.Trt_vs_MS.NoTrt_F |
| SCO1     | 0.04245 | -0.2638 | 0.788 | 0.85 | 1 | MS.Trt_vs_MS.NoTrt_F |
| RASSF3   | 0.04245 | 0.32641 | 0.583 | 0.78 | 1 | MS.Trt_vs_MS.NoTrt_F |
| ZNF550   | 0.04246 | 0.42551 | 0.288 | 0.38 | 1 | MS.Trt_vs_MS.NoTrt_F |



|            |         |         |       |      |   |                      |
|------------|---------|---------|-------|------|---|----------------------|
| SMG8       | 0.04249 | 0.34695 | 0.133 | 0.21 | 1 | MS.Trt_vs_MS.NoTrt_F |
| SYTL2      | 0.04254 | 0.43495 | 0.737 | 0.74 | 1 | MS.Trt_vs_MS.NoTrt_F |
| TYK2       | 0.04262 | 0.51479 | 0.626 | 0.74 | 1 | MS.Trt_vs_MS.NoTrt_F |
| TSPAN5     | 0.04262 | -0.6312 | 0.615 | 0.67 | 1 | MS.Trt_vs_MS.NoTrt_F |
| EIF5B      | 0.04267 | 0.46129 | 0.291 | 0.41 | 1 | MS.Trt_vs_MS.NoTrt_F |
| GSTP1      | 0.04271 | -0.6481 | 0.076 | 0.13 | 1 | MS.Trt_vs_MS.NoTrt_F |
| DUS4L      | 0.04272 | 0.51148 | 0.122 | 0.2  | 1 | MS.Trt_vs_MS.NoTrt_F |
| SELM       | 0.04281 | 0.39676 | 0.281 | 0.38 | 1 | MS.Trt_vs_MS.NoTrt_F |
| ABCC4      | 0.04284 | 0.51773 | 0.784 | 0.81 | 1 | MS.Trt_vs_MS.NoTrt_F |
| SLC25A23   | 0.04289 | 0.26402 | 0.486 | 0.6  | 1 | MS.Trt_vs_MS.NoTrt_F |
| KLHDC3     | 0.04295 | 0.6371  | 0.169 | 0.26 | 1 | MS.Trt_vs_MS.NoTrt_F |
| ZNF84      | 0.04296 | 0.84485 | 0.248 | 0.34 | 1 | MS.Trt_vs_MS.NoTrt_F |
| CEP57L1    | 0.04298 | -0.4615 | 0.529 | 0.61 | 1 | MS.Trt_vs_MS.NoTrt_F |
| GSTM3      | 0.04306 | 0.30943 | 0.471 | 0.6  | 1 | MS.Trt_vs_MS.NoTrt_F |
| LARP1B     | 0.04306 | 0.41259 | 0.101 | 0.17 | 1 | MS.Trt_vs_MS.NoTrt_F |
| EIF3I      | 0.04308 | -0.2912 | 0.536 | 0.6  | 1 | MS.Trt_vs_MS.NoTrt_F |
| IL18BP     | 0.04321 | 0.75806 | 0.126 | 0.2  | 1 | MS.Trt_vs_MS.NoTrt_F |
| NFKB2      | 0.04334 | -1.5537 | 0.403 | 0.49 | 1 | MS.Trt_vs_MS.NoTrt_F |
| GPD2       | 0.04338 | 0.95298 | 0.086 | 0.15 | 1 | MS.Trt_vs_MS.NoTrt_F |
| MBTD1      | 0.04346 | 0.5941  | 0.421 | 0.53 | 1 | MS.Trt_vs_MS.NoTrt_F |
| RABGGTB    | 0.04351 | -0.5338 | 0.277 | 0.38 | 1 | MS.Trt_vs_MS.NoTrt_F |
| LONP2      | 0.04355 | 0.33778 | 0.73  | 0.85 | 1 | MS.Trt_vs_MS.NoTrt_F |
| GARS       | 0.04368 | 0.74657 | 0.187 | 0.29 | 1 | MS.Trt_vs_MS.NoTrt_F |
| PKNOX1     | 0.04372 | -0.3891 | 0.705 | 0.8  | 1 | MS.Trt_vs_MS.NoTrt_F |
| CLHC1      | 0.04376 | -0.4073 | 0.478 | 0.59 | 1 | MS.Trt_vs_MS.NoTrt_F |
| SLC2A1     | 0.04378 | 0.59118 | 0.133 | 0.21 | 1 | MS.Trt_vs_MS.NoTrt_F |
| C5orf22    | 0.04381 | 0.45762 | 0.288 | 0.39 | 1 | MS.Trt_vs_MS.NoTrt_F |
| SETDB2     | 0.04387 | 0.28409 | 0.849 | 0.92 | 1 | MS.Trt_vs_MS.NoTrt_F |
| PPP1R3E    | 0.0439  | -1.01   | 0.248 | 0.33 | 1 | MS.Trt_vs_MS.NoTrt_F |
| LMBR1L     | 0.04398 | -0.4284 | 0.705 | 0.82 | 1 | MS.Trt_vs_MS.NoTrt_F |
| FAM222B    | 0.04407 | 0.74552 | 0.169 | 0.26 | 1 | MS.Trt_vs_MS.NoTrt_F |
| TAF11      | 0.04447 | 0.28826 | 0.453 | 0.58 | 1 | MS.Trt_vs_MS.NoTrt_F |
| TTPAL      | 0.0445  | -0.2875 | 0.813 | 0.86 | 1 | MS.Trt_vs_MS.NoTrt_F |
| ERF        | 0.04463 | 0.60372 | 0.104 | 0.18 | 1 | MS.Trt_vs_MS.NoTrt_F |
| PIK3CG     | 0.04464 | 0.92047 | 0.295 | 0.41 | 1 | MS.Trt_vs_MS.NoTrt_F |
| PDK2       | 0.04466 | 0.32054 | 0.281 | 0.39 | 1 | MS.Trt_vs_MS.NoTrt_F |
| RP11-458D2 | 0.04471 | -0.3325 | 0.126 | 0.2  | 1 | MS.Trt_vs_MS.NoTrt_F |
| ZNF148     | 0.04486 | 0.40708 | 0.302 | 0.42 | 1 | MS.Trt_vs_MS.NoTrt_F |
| FRG1       | 0.04492 | 0.45292 | 0.396 | 0.48 | 1 | MS.Trt_vs_MS.NoTrt_F |
| NAA30      | 0.04508 | -1.1416 | 0.464 | 0.54 | 1 | MS.Trt_vs_MS.NoTrt_F |

|          |         |         |       |      |                        |
|----------|---------|---------|-------|------|------------------------|
| SELP     | 0.04508 | 0.95137 | 0.09  | 0.16 | 1 MS.Trt_vs_MS.NoTrt_F |
| DDX47    | 0.04514 | 0.33742 | 0.471 | 0.56 | 1 MS.Trt_vs_MS.NoTrt_F |
| RAB43    | 0.04526 | 0.33621 | 0.219 | 0.31 | 1 MS.Trt_vs_MS.NoTrt_F |
| PGAP3    | 0.04527 | -0.5338 | 0.126 | 0.2  | 1 MS.Trt_vs_MS.NoTrt_F |
| ZBED6    | 0.0453  | 0.47484 | 0.079 | 0.14 | 1 MS.Trt_vs_MS.NoTrt_F |
| YIPF5    | 0.04531 | -0.9614 | 0.496 | 0.55 | 1 MS.Trt_vs_MS.NoTrt_F |
| PGAP1    | 0.04533 | 0.29606 | 0.367 | 0.46 | 1 MS.Trt_vs_MS.NoTrt_F |
| HBP1     | 0.04541 | -0.3117 | 0.799 | 0.87 | 1 MS.Trt_vs_MS.NoTrt_F |
| NUDCD1   | 0.04541 | 0.44258 | 0.083 | 0.14 | 1 MS.Trt_vs_MS.NoTrt_F |
| NDST2    | 0.04542 | 0.74198 | 0.094 | 0.16 | 1 MS.Trt_vs_MS.NoTrt_F |
| WDR45    | 0.04551 | -0.4278 | 0.579 | 0.69 | 1 MS.Trt_vs_MS.NoTrt_F |
| KRBA2    | 0.04557 | -1.1968 | 0.363 | 0.44 | 1 MS.Trt_vs_MS.NoTrt_F |
| MAD2L2   | 0.04557 | 0.40469 | 0.137 | 0.22 | 1 MS.Trt_vs_MS.NoTrt_F |
| SHTN1    | 0.04564 | 0.35196 | 0.119 | 0.19 | 1 MS.Trt_vs_MS.NoTrt_F |
| MAST4    | 0.0458  | -0.5892 | 0.572 | 0.65 | 1 MS.Trt_vs_MS.NoTrt_F |
| USP38    | 0.04593 | -0.3326 | 0.288 | 0.39 | 1 MS.Trt_vs_MS.NoTrt_F |
| ALPK1    | 0.0461  | 0.34547 | 0.698 | 0.77 | 1 MS.Trt_vs_MS.NoTrt_F |
| PIGU     | 0.04617 | 0.76321 | 0.115 | 0.19 | 1 MS.Trt_vs_MS.NoTrt_F |
| ANKRD49  | 0.04618 | 0.63697 | 0.183 | 0.27 | 1 MS.Trt_vs_MS.NoTrt_F |
| DIP2C    | 0.04621 | -0.45   | 0.086 | 0.15 | 1 MS.Trt_vs_MS.NoTrt_F |
| PTEN     | 0.04621 | 0.72628 | 0.518 | 0.66 | 1 MS.Trt_vs_MS.NoTrt_F |
| AOAH     | 0.04621 | 1.15084 | 0.363 | 0.47 | 1 MS.Trt_vs_MS.NoTrt_F |
| PSMD11   | 0.04629 | 0.29245 | 0.482 | 0.59 | 1 MS.Trt_vs_MS.NoTrt_F |
| CRELD1   | 0.04648 | 0.31226 | 0.126 | 0.19 | 1 MS.Trt_vs_MS.NoTrt_F |
| ATXN1    | 0.04652 | 0.4144  | 0.309 | 0.42 | 1 MS.Trt_vs_MS.NoTrt_F |
| CDADC1   | 0.04658 | 0.27165 | 0.083 | 0.14 | 1 MS.Trt_vs_MS.NoTrt_F |
| C12orf66 | 0.04666 | -0.6357 | 0.353 | 0.44 | 1 MS.Trt_vs_MS.NoTrt_F |
| PRKX     | 0.04672 | 0.51489 | 0.54  | 0.68 | 1 MS.Trt_vs_MS.NoTrt_F |
| DNAH17   | 0.04675 | 0.32771 | 0.313 | 0.4  | 1 MS.Trt_vs_MS.NoTrt_F |
| CHST7    | 0.04686 | 1.18981 | 0.09  | 0.16 | 1 MS.Trt_vs_MS.NoTrt_F |
| MUTYH    | 0.04688 | -0.8201 | 0.507 | 0.57 | 1 MS.Trt_vs_MS.NoTrt_F |
| BMI1     | 0.0469  | 1.24854 | 0.083 | 0.14 | 1 MS.Trt_vs_MS.NoTrt_F |
| AHSA2    | 0.0469  | 0.45209 | 0.237 | 0.34 | 1 MS.Trt_vs_MS.NoTrt_F |
| TNF      | 0.04699 | 0.36934 | 0.151 | 0.23 | 1 MS.Trt_vs_MS.NoTrt_F |
| FAM114A2 | 0.04705 | 0.70067 | 0.108 | 0.18 | 1 MS.Trt_vs_MS.NoTrt_F |
| STK17B   | 0.04708 | 0.5719  | 0.942 | 0.97 | 1 MS.Trt_vs_MS.NoTrt_F |
| MRPS7    | 0.04713 | -0.4342 | 0.522 | 0.6  | 1 MS.Trt_vs_MS.NoTrt_F |
| SHANK1   | 0.04715 | -0.2743 | 0.302 | 0.38 | 1 MS.Trt_vs_MS.NoTrt_F |
| SREK1    | 0.04743 | 0.43443 | 0.525 | 0.62 | 1 MS.Trt_vs_MS.NoTrt_F |
| COX6C    | 0.04746 | 0.53413 | 0.486 | 0.62 | 1 MS.Trt_vs_MS.NoTrt_F |

|          |         |         |       |      |                        |
|----------|---------|---------|-------|------|------------------------|
| SFT2D1   | 0.04751 | 0.57038 | 0.414 | 0.49 | 1 MS.Trt_vs_MS.NoTrt_F |
| PRMT5    | 0.04756 | 0.94913 | 0.09  | 0.16 | 1 MS.Trt_vs_MS.NoTrt_F |
| WNT7A    | 0.04762 | 0.92782 | 0.072 | 0.13 | 1 MS.Trt_vs_MS.NoTrt_F |
| XPA      | 0.0479  | 0.64606 | 0.147 | 0.23 | 1 MS.Trt_vs_MS.NoTrt_F |
| STX11    | 0.04791 | 0.75097 | 0.079 | 0.14 | 1 MS.Trt_vs_MS.NoTrt_F |
| POLN     | 0.04811 | -0.4082 | 0.615 | 0.72 | 1 MS.Trt_vs_MS.NoTrt_F |
| STARD3NL | 0.0482  | -0.2666 | 0.673 | 0.74 | 1 MS.Trt_vs_MS.NoTrt_F |
| ABCD2    | 0.04837 | 0.54878 | 0.119 | 0.19 | 1 MS.Trt_vs_MS.NoTrt_F |
| CYBA     | 0.04837 | 0.35718 | 0.299 | 0.39 | 1 MS.Trt_vs_MS.NoTrt_F |
| LIPT1    | 0.04843 | -0.35   | 0.676 | 0.78 | 1 MS.Trt_vs_MS.NoTrt_F |
| BUB3     | 0.04851 | 0.30272 | 0.662 | 0.8  | 1 MS.Trt_vs_MS.NoTrt_F |
| BAG6     | 0.04854 | 0.31518 | 0.554 | 0.59 | 1 MS.Trt_vs_MS.NoTrt_F |
| ZNF596   | 0.04861 | 0.63426 | 0.45  | 0.52 | 1 MS.Trt_vs_MS.NoTrt_F |
| SNAPC2   | 0.04865 | 0.285   | 0.083 | 0.14 | 1 MS.Trt_vs_MS.NoTrt_F |
| ZBED1    | 0.04876 | -0.8472 | 0.468 | 0.55 | 1 MS.Trt_vs_MS.NoTrt_F |
| USP9Y    | 0.04878 | -0.9307 | 0.27  | 0.35 | 1 MS.Trt_vs_MS.NoTrt_F |
| PSMB8    | 0.04886 | 0.33797 | 0.388 | 0.52 | 1 MS.Trt_vs_MS.NoTrt_F |
| ZBTB21   | 0.04887 | 0.64254 | 0.147 | 0.23 | 1 MS.Trt_vs_MS.NoTrt_F |
| MMP24    | 0.04892 | 0.70001 | 0.101 | 0.17 | 1 MS.Trt_vs_MS.NoTrt_F |
| STK35    | 0.04893 | 1.50147 | 0.09  | 0.16 | 1 MS.Trt_vs_MS.NoTrt_F |
| BTBD9    | 0.04918 | 0.63245 | 0.568 | 0.63 | 1 MS.Trt_vs_MS.NoTrt_F |
| PAK1     | 0.04919 | 0.61698 | 0.173 | 0.26 | 1 MS.Trt_vs_MS.NoTrt_F |
| C10orf67 | 0.04926 | 0.31834 | 0.288 | 0.38 | 1 MS.Trt_vs_MS.NoTrt_F |
| CCR3     | 0.04938 | 0.61407 | 0.083 | 0.14 | 1 MS.Trt_vs_MS.NoTrt_F |
| FAM188A  | 0.04942 | 1.03622 | 0.115 | 0.18 | 1 MS.Trt_vs_MS.NoTrt_F |
| UCK1     | 0.0495  | 0.79172 | 0.076 | 0.13 | 1 MS.Trt_vs_MS.NoTrt_F |
| TTC5     | 0.0495  | -0.5282 | 0.511 | 0.61 | 1 MS.Trt_vs_MS.NoTrt_F |
| TMEM179B | 0.0498  | 0.39221 | 0.216 | 0.32 | 1 MS.Trt_vs_MS.NoTrt_F |
| RAP2A    | 0.04987 | -0.6743 | 0.068 | 0.12 | 1 MS.Trt_vs_MS.NoTrt_F |
| KPTN     | 0.04987 | -0.6221 | 0.198 | 0.28 | 1 MS.Trt_vs_MS.NoTrt_F |
| CNEP1R1  | 0.04991 | 0.73512 | 0.583 | 0.66 | 1 MS.Trt_vs_MS.NoTrt_F |
| GLUD1    | 0.05005 | 0.58163 | 0.248 | 0.35 | 1 MS.Trt_vs_MS.NoTrt_F |
| USF1     | 0.05008 | -0.747  | 0.18  | 0.25 | 1 MS.Trt_vs_MS.NoTrt_F |
| AP1B1    | 0.05014 | 0.54585 | 0.162 | 0.25 | 1 MS.Trt_vs_MS.NoTrt_F |
| CBX6     | 0.05017 | 0.96397 | 0.601 | 0.65 | 1 MS.Trt_vs_MS.NoTrt_F |
| TSPAN3   | 0.05018 | -0.4721 | 0.349 | 0.43 | 1 MS.Trt_vs_MS.NoTrt_F |
| RSPH3    | 0.05021 | 0.4027  | 0.799 | 0.82 | 1 MS.Trt_vs_MS.NoTrt_F |
| TMEM234  | 0.05022 | 0.66837 | 0.112 | 0.18 | 1 MS.Trt_vs_MS.NoTrt_F |
| ADPRM    | 0.05022 | 0.41598 | 0.101 | 0.17 | 1 MS.Trt_vs_MS.NoTrt_F |
| USP1     | 0.05023 | 1.1491  | 0.151 | 0.23 | 1 MS.Trt_vs_MS.NoTrt_F |

|          |         |         |       |      |   |                      |
|----------|---------|---------|-------|------|---|----------------------|
| INPP1    | 0.05026 | 0.58063 | 0.079 | 0.14 | 1 | MS.Trt_vs_MS.NoTrt_F |
| ERMN     | 0.05031 | 0.58981 | 0.23  | 0.32 | 1 | MS.Trt_vs_MS.NoTrt_F |
| MRPL49   | 0.05033 | -0.3807 | 0.45  | 0.53 | 1 | MS.Trt_vs_MS.NoTrt_F |
| FAH      | 0.05036 | 0.30226 | 0.122 | 0.19 | 1 | MS.Trt_vs_MS.NoTrt_F |
| NEIL2    | 0.05044 | 0.9637  | 0.119 | 0.19 | 1 | MS.Trt_vs_MS.NoTrt_F |
| EXOC3    | 0.05054 | -0.2744 | 0.216 | 0.3  | 1 | MS.Trt_vs_MS.NoTrt_F |
| GPAA1    | 0.05054 | 0.59382 | 0.158 | 0.24 | 1 | MS.Trt_vs_MS.NoTrt_F |
| ATMIN    | 0.05058 | 0.2691  | 0.27  | 0.35 | 1 | MS.Trt_vs_MS.NoTrt_F |
| 8-Mar    | 0.0507  | 0.48139 | 0.342 | 0.46 | 1 | MS.Trt_vs_MS.NoTrt_F |
| TMEM14C  | 0.05076 | 0.61254 | 0.129 | 0.2  | 1 | MS.Trt_vs_MS.NoTrt_F |
| PLPP1    | 0.05085 | 0.62705 | 0.101 | 0.17 | 1 | MS.Trt_vs_MS.NoTrt_F |
| SNRNP27  | 0.05091 | 0.79286 | 0.234 | 0.34 | 1 | MS.Trt_vs_MS.NoTrt_F |
| SBK1     | 0.05092 | -0.7929 | 0.169 | 0.24 | 1 | MS.Trt_vs_MS.NoTrt_F |
| CD99L2   | 0.05099 | 0.70112 | 0.129 | 0.2  | 1 | MS.Trt_vs_MS.NoTrt_F |
| TMEM11   | 0.05099 | 0.81888 | 0.129 | 0.21 | 1 | MS.Trt_vs_MS.NoTrt_F |
| CCNG2    | 0.05106 | 0.30135 | 0.338 | 0.41 | 1 | MS.Trt_vs_MS.NoTrt_F |
| UPRT     | 0.05113 | 0.91065 | 0.083 | 0.14 | 1 | MS.Trt_vs_MS.NoTrt_F |
| RAB6A    | 0.05115 | 0.35174 | 0.36  | 0.49 | 1 | MS.Trt_vs_MS.NoTrt_F |
| TRMT6    | 0.05115 | 0.92252 | 0.137 | 0.22 | 1 | MS.Trt_vs_MS.NoTrt_F |
| KLHDC1   | 0.0514  | -0.2545 | 0.309 | 0.4  | 1 | MS.Trt_vs_MS.NoTrt_F |
| LMO7     | 0.05145 | -0.389  | 0.277 | 0.37 | 1 | MS.Trt_vs_MS.NoTrt_F |
| UBA5     | 0.0515  | 1.0706  | 0.147 | 0.23 | 1 | MS.Trt_vs_MS.NoTrt_F |
| CD63     | 0.05161 | 0.30365 | 0.187 | 0.27 | 1 | MS.Trt_vs_MS.NoTrt_F |
| MEMO1    | 0.05181 | 0.46477 | 0.36  | 0.45 | 1 | MS.Trt_vs_MS.NoTrt_F |
| LAPTM4A  | 0.05181 | 0.33461 | 0.198 | 0.28 | 1 | MS.Trt_vs_MS.NoTrt_F |
| NDC80    | 0.05199 | 0.26059 | 0.662 | 0.77 | 1 | MS.Trt_vs_MS.NoTrt_F |
| BBS4     | 0.05219 | -0.6442 | 0.126 | 0.19 | 1 | MS.Trt_vs_MS.NoTrt_F |
| DNAJC5   | 0.05221 | 0.88441 | 0.097 | 0.16 | 1 | MS.Trt_vs_MS.NoTrt_F |
| NR2C2    | 0.05234 | 0.4535  | 0.622 | 0.72 | 1 | MS.Trt_vs_MS.NoTrt_F |
| ZNF570   | 0.05236 | 0.59435 | 0.791 | 0.88 | 1 | MS.Trt_vs_MS.NoTrt_F |
| FBRS     | 0.05236 | 0.45511 | 0.176 | 0.27 | 1 | MS.Trt_vs_MS.NoTrt_F |
| ADTRP    | 0.05238 | -0.4821 | 0.342 | 0.43 | 1 | MS.Trt_vs_MS.NoTrt_F |
| BLM      | 0.05239 | 0.30841 | 0.27  | 0.36 | 1 | MS.Trt_vs_MS.NoTrt_F |
| ATP6AP1L | 0.05241 | -0.4384 | 0.453 | 0.55 | 1 | MS.Trt_vs_MS.NoTrt_F |
| FN3KRP   | 0.05244 | 0.86047 | 0.112 | 0.18 | 1 | MS.Trt_vs_MS.NoTrt_F |
| CRTC1    | 0.05248 | 0.38135 | 0.245 | 0.35 | 1 | MS.Trt_vs_MS.NoTrt_F |
| SLC10A3  | 0.0525  | 0.88479 | 0.097 | 0.16 | 1 | MS.Trt_vs_MS.NoTrt_F |
| TP53INP1 | 0.05252 | 0.43396 | 0.353 | 0.48 | 1 | MS.Trt_vs_MS.NoTrt_F |
| TOMM5    | 0.05257 | 0.51109 | 0.219 | 0.32 | 1 | MS.Trt_vs_MS.NoTrt_F |
| CAD      | 0.0526  | 0.77157 | 0.734 | 0.7  | 1 | MS.Trt_vs_MS.NoTrt_F |

|            |         |         |       |      |                        |
|------------|---------|---------|-------|------|------------------------|
| PIGH       | 0.0527  | 0.77557 | 0.561 | 0.68 | 1 MS.Trt_vs_MS.NoTrt_F |
| PPT1       | 0.05285 | 0.50861 | 0.234 | 0.34 | 1 MS.Trt_vs_MS.NoTrt_F |
| DSTYK      | 0.053   | 0.5569  | 0.799 | 0.9  | 1 MS.Trt_vs_MS.NoTrt_F |
| ZNF473     | 0.05302 | 1.34771 | 0.079 | 0.14 | 1 MS.Trt_vs_MS.NoTrt_F |
| PLEKHA1    | 0.05303 | -0.3196 | 0.896 | 0.95 | 1 MS.Trt_vs_MS.NoTrt_F |
| ORAI1      | 0.05304 | 0.60982 | 0.097 | 0.16 | 1 MS.Trt_vs_MS.NoTrt_F |
| ACBD3      | 0.05305 | -0.3994 | 0.072 | 0.13 | 1 MS.Trt_vs_MS.NoTrt_F |
| SMAD4      | 0.05307 | -0.3717 | 0.442 | 0.53 | 1 MS.Trt_vs_MS.NoTrt_F |
| GNLY       | 0.0532  | 2.38036 | 0.252 | 0.34 | 1 MS.Trt_vs_MS.NoTrt_F |
| RHOT2      | 0.05333 | 0.31413 | 0.281 | 0.4  | 1 MS.Trt_vs_MS.NoTrt_F |
| PSMD1      | 0.0535  | 0.49217 | 0.209 | 0.31 | 1 MS.Trt_vs_MS.NoTrt_F |
| ZNF277     | 0.05351 | 0.45009 | 0.504 | 0.61 | 1 MS.Trt_vs_MS.NoTrt_F |
| ZNF75D     | 0.05355 | 0.64176 | 0.09  | 0.15 | 1 MS.Trt_vs_MS.NoTrt_F |
| SLC5A5     | 0.05355 | -0.8786 | 0.432 | 0.5  | 1 MS.Trt_vs_MS.NoTrt_F |
| C9orf142   | 0.05366 | 0.2615  | 0.263 | 0.38 | 1 MS.Trt_vs_MS.NoTrt_F |
| ZNF816     | 0.0537  | 0.88635 | 0.428 | 0.52 | 1 MS.Trt_vs_MS.NoTrt_F |
| NRROS      | 0.05372 | 0.26402 | 0.126 | 0.19 | 1 MS.Trt_vs_MS.NoTrt_F |
| ACAT1      | 0.05377 | 0.41948 | 0.604 | 0.72 | 1 MS.Trt_vs_MS.NoTrt_F |
| COL4A3BP   | 0.05378 | 0.62018 | 0.155 | 0.24 | 1 MS.Trt_vs_MS.NoTrt_F |
| FUBP1      | 0.05384 | 0.61915 | 0.41  | 0.54 | 1 MS.Trt_vs_MS.NoTrt_F |
| ZNF721     | 0.05393 | 0.348   | 0.371 | 0.46 | 1 MS.Trt_vs_MS.NoTrt_F |
| ZNF100     | 0.05397 | 0.62906 | 0.838 | 0.83 | 1 MS.Trt_vs_MS.NoTrt_F |
| ARHGAP19-! | 0.05402 | -0.3556 | 0.065 | 0.12 | 1 MS.Trt_vs_MS.NoTrt_F |
| RORC       | 0.05411 | 1.03833 | 0.122 | 0.19 | 1 MS.Trt_vs_MS.NoTrt_F |
| ZNF880     | 0.05416 | 0.97446 | 0.5   | 0.56 | 1 MS.Trt_vs_MS.NoTrt_F |
| C14orf169  | 0.05421 | 0.40236 | 0.108 | 0.18 | 1 MS.Trt_vs_MS.NoTrt_F |
| NDUFV1     | 0.05424 | 0.32545 | 0.277 | 0.4  | 1 MS.Trt_vs_MS.NoTrt_F |
| AHSA1      | 0.05425 | -0.4432 | 0.547 | 0.61 | 1 MS.Trt_vs_MS.NoTrt_F |
| SHQ1       | 0.05425 | -0.4769 | 0.68  | 0.76 | 1 MS.Trt_vs_MS.NoTrt_F |
| ZBED2      | 0.05427 | -0.2503 | 0.068 | 0.12 | 1 MS.Trt_vs_MS.NoTrt_F |
| PLK1       | 0.05427 | 0.36466 | 0.457 | 0.53 | 1 MS.Trt_vs_MS.NoTrt_F |
| ADGRL1     | 0.05437 | 0.90588 | 0.076 | 0.13 | 1 MS.Trt_vs_MS.NoTrt_F |
| ARSD       | 0.05447 | 0.51186 | 0.77  | 0.83 | 1 MS.Trt_vs_MS.NoTrt_F |
| GBE1       | 0.05449 | 0.83723 | 0.076 | 0.13 | 1 MS.Trt_vs_MS.NoTrt_F |
| MALT1      | 0.05453 | 0.70197 | 0.129 | 0.2  | 1 MS.Trt_vs_MS.NoTrt_F |
| FAM110C    | 0.05459 | 0.40625 | 0.259 | 0.35 | 1 MS.Trt_vs_MS.NoTrt_F |
| ZNRF2      | 0.05481 | 0.68774 | 0.083 | 0.14 | 1 MS.Trt_vs_MS.NoTrt_F |
| TM9SF1     | 0.0549  | 1.04957 | 0.255 | 0.34 | 1 MS.Trt_vs_MS.NoTrt_F |
| AKAP10     | 0.05506 | 0.30449 | 0.471 | 0.57 | 1 MS.Trt_vs_MS.NoTrt_F |
| PDIA4      | 0.05516 | 0.92366 | 0.097 | 0.16 | 1 MS.Trt_vs_MS.NoTrt_F |

|         |         |         |       |      |   |                      |
|---------|---------|---------|-------|------|---|----------------------|
| MED23   | 0.05516 | 0.27927 | 0.212 | 0.3  | 1 | MS.Trt_vs_MS.NoTrt_F |
| TREML2  | 0.0552  | 1.50611 | 0.129 | 0.2  | 1 | MS.Trt_vs_MS.NoTrt_F |
| UPF1    | 0.05526 | 0.37736 | 0.137 | 0.21 | 1 | MS.Trt_vs_MS.NoTrt_F |
| BABAM1  | 0.05528 | 0.498   | 0.619 | 0.7  | 1 | MS.Trt_vs_MS.NoTrt_F |
| SIPA1   | 0.05529 | 0.57779 | 0.532 | 0.68 | 1 | MS.Trt_vs_MS.NoTrt_F |
| IL17RD  | 0.05538 | 0.71937 | 0.586 | 0.7  | 1 | MS.Trt_vs_MS.NoTrt_F |
| PAK3    | 0.05548 | -0.6551 | 0.421 | 0.55 | 1 | MS.Trt_vs_MS.NoTrt_F |
| APAF1   | 0.0555  | -0.3169 | 0.597 | 0.68 | 1 | MS.Trt_vs_MS.NoTrt_F |
| BROX    | 0.05554 | 0.65167 | 0.644 | 0.71 | 1 | MS.Trt_vs_MS.NoTrt_F |
| AAR2    | 0.05557 | 0.86525 | 0.23  | 0.32 | 1 | MS.Trt_vs_MS.NoTrt_F |
| GORASP1 | 0.05569 | -0.5522 | 0.101 | 0.16 | 1 | MS.Trt_vs_MS.NoTrt_F |
| HSF1    | 0.05569 | -0.3787 | 0.424 | 0.51 | 1 | MS.Trt_vs_MS.NoTrt_F |
| GIPC1   | 0.05583 | 0.4061  | 0.457 | 0.59 | 1 | MS.Trt_vs_MS.NoTrt_F |
| MEGF11  | 0.05584 | -1.0298 | 0.065 | 0.12 | 1 | MS.Trt_vs_MS.NoTrt_F |
| SEC61A2 | 0.05585 | 1.05113 | 0.108 | 0.18 | 1 | MS.Trt_vs_MS.NoTrt_F |
| DNAH9   | 0.05597 | 0.52062 | 0.565 | 0.49 | 1 | MS.Trt_vs_MS.NoTrt_F |
| SLC4A7  | 0.05603 | 0.2885  | 0.342 | 0.44 | 1 | MS.Trt_vs_MS.NoTrt_F |
| ALG3    | 0.05606 | 1.12992 | 0.173 | 0.27 | 1 | MS.Trt_vs_MS.NoTrt_F |
| LNPB    | 0.0561  | 0.25005 | 0.547 | 0.62 | 1 | MS.Trt_vs_MS.NoTrt_F |
| FAM50A  | 0.05625 | 0.60022 | 0.147 | 0.22 | 1 | MS.Trt_vs_MS.NoTrt_F |
| NATD1   | 0.05628 | 0.3752  | 0.432 | 0.54 | 1 | MS.Trt_vs_MS.NoTrt_F |
| NCKIPSD | 0.05637 | -1.801  | 0.058 | 0.11 | 1 | MS.Trt_vs_MS.NoTrt_F |
| ANXA1   | 0.05639 | -0.3534 | 0.266 | 0.36 | 1 | MS.Trt_vs_MS.NoTrt_F |
| CAMKMT  | 0.05642 | 0.7398  | 0.306 | 0.4  | 1 | MS.Trt_vs_MS.NoTrt_F |
| KLHL3   | 0.0565  | 0.34025 | 0.209 | 0.29 | 1 | MS.Trt_vs_MS.NoTrt_F |
| VDAC1   | 0.05683 | -0.3146 | 0.676 | 0.84 | 1 | MS.Trt_vs_MS.NoTrt_F |
| NBPF11  | 0.0569  | 0.6444  | 0.288 | 0.4  | 1 | MS.Trt_vs_MS.NoTrt_F |
| ITGA3   | 0.05691 | -0.3812 | 0.719 | 0.81 | 1 | MS.Trt_vs_MS.NoTrt_F |
| POLG2   | 0.05697 | -0.346  | 0.493 | 0.56 | 1 | MS.Trt_vs_MS.NoTrt_F |
| SORD    | 0.05699 | 0.46418 | 0.18  | 0.25 | 1 | MS.Trt_vs_MS.NoTrt_F |
| DDX51   | 0.05703 | 0.63573 | 0.683 | 0.66 | 1 | MS.Trt_vs_MS.NoTrt_F |
| NEO1    | 0.05707 | 0.75345 | 0.241 | 0.36 | 1 | MS.Trt_vs_MS.NoTrt_F |
| EIF1AY  | 0.05711 | -0.8168 | 0.615 | 0.67 | 1 | MS.Trt_vs_MS.NoTrt_F |
| TMEM187 | 0.05737 | 0.88169 | 0.068 | 0.12 | 1 | MS.Trt_vs_MS.NoTrt_F |
| ULBP3   | 0.05751 | 0.77485 | 0.543 | 0.6  | 1 | MS.Trt_vs_MS.NoTrt_F |
| USP42   | 0.05758 | -0.4099 | 0.435 | 0.51 | 1 | MS.Trt_vs_MS.NoTrt_F |
| SLC9A7  | 0.0576  | 0.57549 | 0.957 | 0.92 | 1 | MS.Trt_vs_MS.NoTrt_F |
| NUDT7   | 0.05786 | 0.61109 | 0.212 | 0.29 | 1 | MS.Trt_vs_MS.NoTrt_F |
| FAM104B | 0.05795 | 0.58552 | 0.086 | 0.14 | 1 | MS.Trt_vs_MS.NoTrt_F |
| MPDU1   | 0.05797 | -0.3702 | 0.791 | 0.89 | 1 | MS.Trt_vs_MS.NoTrt_F |

|           |         |         |       |      |   |                      |
|-----------|---------|---------|-------|------|---|----------------------|
| AMDHD1    | 0.05799 | 0.50162 | 0.191 | 0.28 | 1 | MS.Trt_vs_MS.NoTrt_F |
| GIPR      | 0.058   | 0.51121 | 0.651 | 0.71 | 1 | MS.Trt_vs_MS.NoTrt_F |
| OSTF1     | 0.05804 | 0.43346 | 0.291 | 0.39 | 1 | MS.Trt_vs_MS.NoTrt_F |
| RP11-544M | 0.05809 | 0.52248 | 0.227 | 0.31 | 1 | MS.Trt_vs_MS.NoTrt_F |
| GAA       | 0.05819 | 0.33703 | 0.094 | 0.16 | 1 | MS.Trt_vs_MS.NoTrt_F |
| RABIF     | 0.05841 | 0.46237 | 0.356 | 0.45 | 1 | MS.Trt_vs_MS.NoTrt_F |
| PAFAH1B2  | 0.05843 | 0.42999 | 0.82  | 0.95 | 1 | MS.Trt_vs_MS.NoTrt_F |
| C10orf95  | 0.05848 | 0.55388 | 0.169 | 0.25 | 1 | MS.Trt_vs_MS.NoTrt_F |
| KDM7A     | 0.05859 | -0.3447 | 0.263 | 0.35 | 1 | MS.Trt_vs_MS.NoTrt_F |
| FAM91A1   | 0.0586  | -0.983  | 0.338 | 0.45 | 1 | MS.Trt_vs_MS.NoTrt_F |
| RPS6KA3   | 0.05866 | -0.4091 | 0.471 | 0.6  | 1 | MS.Trt_vs_MS.NoTrt_F |
| CALR      | 0.0587  | -0.3272 | 0.806 | 0.86 | 1 | MS.Trt_vs_MS.NoTrt_F |
| DROSHA    | 0.05875 | 0.4887  | 0.324 | 0.43 | 1 | MS.Trt_vs_MS.NoTrt_F |
| OSBPL3    | 0.05902 | 0.25506 | 0.45  | 0.57 | 1 | MS.Trt_vs_MS.NoTrt_F |
| CTCF      | 0.05913 | 0.79305 | 0.151 | 0.23 | 1 | MS.Trt_vs_MS.NoTrt_F |
| MST1      | 0.05914 | -1.0698 | 0.058 | 0.11 | 1 | MS.Trt_vs_MS.NoTrt_F |
| CCR7      | 0.05925 | 0.33999 | 0.421 | 0.57 | 1 | MS.Trt_vs_MS.NoTrt_F |
| DEPDC7    | 0.05927 | 0.3956  | 0.079 | 0.13 | 1 | MS.Trt_vs_MS.NoTrt_F |
| RGL4      | 0.05934 | 0.38019 | 0.255 | 0.36 | 1 | MS.Trt_vs_MS.NoTrt_F |
| ZNF551    | 0.05941 | 0.70559 | 0.489 | 0.56 | 1 | MS.Trt_vs_MS.NoTrt_F |
| ZCCHC4    | 0.05943 | -0.3786 | 0.615 | 0.7  | 1 | MS.Trt_vs_MS.NoTrt_F |
| ZNF830    | 0.05944 | 0.5635  | 0.108 | 0.17 | 1 | MS.Trt_vs_MS.NoTrt_F |
| URB2      | 0.05946 | -1.1254 | 0.058 | 0.11 | 1 | MS.Trt_vs_MS.NoTrt_F |
| NAGPA     | 0.0595  | -0.3257 | 0.669 | 0.71 | 1 | MS.Trt_vs_MS.NoTrt_F |
| GPCPD1    | 0.05951 | 0.30654 | 0.356 | 0.48 | 1 | MS.Trt_vs_MS.NoTrt_F |
| C1orf216  | 0.05956 | 0.78181 | 0.73  | 0.84 | 1 | MS.Trt_vs_MS.NoTrt_F |
| LCAT      | 0.05965 | 0.4365  | 0.205 | 0.3  | 1 | MS.Trt_vs_MS.NoTrt_F |
| GIMAP5    | 0.05966 | 0.37121 | 0.338 | 0.45 | 1 | MS.Trt_vs_MS.NoTrt_F |
| SARNP     | 0.05989 | 0.28173 | 0.579 | 0.65 | 1 | MS.Trt_vs_MS.NoTrt_F |
| PHB2      | 0.05991 | 0.40006 | 0.176 | 0.26 | 1 | MS.Trt_vs_MS.NoTrt_F |
| SLC25A30  | 0.05997 | -0.3259 | 0.644 | 0.72 | 1 | MS.Trt_vs_MS.NoTrt_F |
| SLC8A1    | 0.06    | 0.60923 | 0.378 | 0.29 | 1 | MS.Trt_vs_MS.NoTrt_F |
| RAB11FIP2 | 0.06002 | -0.695  | 0.086 | 0.14 | 1 | MS.Trt_vs_MS.NoTrt_F |
| ERCC6     | 0.06002 | -0.4679 | 0.266 | 0.34 | 1 | MS.Trt_vs_MS.NoTrt_F |
| CEP97     | 0.06007 | 0.53368 | 0.64  | 0.78 | 1 | MS.Trt_vs_MS.NoTrt_F |
| SNIP1     | 0.06008 | 0.52786 | 0.619 | 0.74 | 1 | MS.Trt_vs_MS.NoTrt_F |
| MINA      | 0.06024 | 0.61541 | 0.126 | 0.2  | 1 | MS.Trt_vs_MS.NoTrt_F |
| AP1S2     | 0.06031 | 0.78192 | 0.201 | 0.3  | 1 | MS.Trt_vs_MS.NoTrt_F |
| NDRG2     | 0.06045 | -0.2671 | 0.835 | 0.88 | 1 | MS.Trt_vs_MS.NoTrt_F |
| CREB3     | 0.0606  | 0.46928 | 0.108 | 0.18 | 1 | MS.Trt_vs_MS.NoTrt_F |

|            |         |         |       |      |   |                      |
|------------|---------|---------|-------|------|---|----------------------|
| RHOBTB3    | 0.06061 | -0.2593 | 0.572 | 0.69 | 1 | MS.Trt_vs_MS.NoTrt_F |
| STOM       | 0.06072 | 0.8176  | 0.655 | 0.64 | 1 | MS.Trt_vs_MS.NoTrt_F |
| DHRS1      | 0.06076 | -0.365  | 0.608 | 0.66 | 1 | MS.Trt_vs_MS.NoTrt_F |
| UBE3B      | 0.06089 | -0.5309 | 0.331 | 0.4  | 1 | MS.Trt_vs_MS.NoTrt_F |
| USE1       | 0.06093 | 0.69105 | 0.917 | 0.86 | 1 | MS.Trt_vs_MS.NoTrt_F |
| ARPC4      | 0.06102 | 0.62003 | 0.683 | 0.71 | 1 | MS.Trt_vs_MS.NoTrt_F |
| APLF       | 0.06105 | 0.67849 | 0.176 | 0.25 | 1 | MS.Trt_vs_MS.NoTrt_F |
| MBIP       | 0.06106 | 0.95542 | 0.097 | 0.16 | 1 | MS.Trt_vs_MS.NoTrt_F |
| ACOT7      | 0.06109 | 0.45814 | 0.058 | 0.11 | 1 | MS.Trt_vs_MS.NoTrt_F |
| TNS2       | 0.06116 | 0.26278 | 0.342 | 0.41 | 1 | MS.Trt_vs_MS.NoTrt_F |
| TOPORS-AS1 | 0.06116 | 0.89966 | 0.115 | 0.18 | 1 | MS.Trt_vs_MS.NoTrt_F |
| CTD-2021K4 | 0.06126 | 0.28425 | 0.115 | 0.18 | 1 | MS.Trt_vs_MS.NoTrt_F |
| GATAD2B    | 0.0615  | 0.32097 | 0.514 | 0.65 | 1 | MS.Trt_vs_MS.NoTrt_F |
| C1QTNF6    | 0.06152 | 0.30066 | 0.547 | 0.67 | 1 | MS.Trt_vs_MS.NoTrt_F |
| ACADL      | 0.06165 | -0.3153 | 0.288 | 0.37 | 1 | MS.Trt_vs_MS.NoTrt_F |
| ATRN       | 0.06165 | 0.43168 | 0.119 | 0.19 | 1 | MS.Trt_vs_MS.NoTrt_F |
| MAP3K12    | 0.06203 | 0.6392  | 0.701 | 0.79 | 1 | MS.Trt_vs_MS.NoTrt_F |
| ZNF43      | 0.06212 | 1.08604 | 0.773 | 0.79 | 1 | MS.Trt_vs_MS.NoTrt_F |
| ANKRD26    | 0.06227 | 1.3373  | 0.144 | 0.22 | 1 | MS.Trt_vs_MS.NoTrt_F |
| AARSD1     | 0.0623  | -0.4026 | 0.676 | 0.77 | 1 | MS.Trt_vs_MS.NoTrt_F |
| RPS7       | 0.06234 | -0.3574 | 0.514 | 0.59 | 1 | MS.Trt_vs_MS.NoTrt_F |
| CTBS       | 0.06241 | 0.57654 | 0.147 | 0.22 | 1 | MS.Trt_vs_MS.NoTrt_F |
| TFDP1      | 0.06241 | -0.4064 | 0.061 | 0.11 | 1 | MS.Trt_vs_MS.NoTrt_F |
| ADAT2      | 0.06248 | 0.51086 | 0.381 | 0.45 | 1 | MS.Trt_vs_MS.NoTrt_F |
| PLIN3      | 0.06265 | -0.3888 | 0.54  | 0.6  | 1 | MS.Trt_vs_MS.NoTrt_F |
| CAAP1      | 0.06269 | 0.41594 | 0.158 | 0.23 | 1 | MS.Trt_vs_MS.NoTrt_F |
| LRG1       | 0.06272 | 0.40345 | 0.813 | 0.76 | 1 | MS.Trt_vs_MS.NoTrt_F |
| EEF1E1     | 0.06286 | 0.29499 | 0.475 | 0.56 | 1 | MS.Trt_vs_MS.NoTrt_F |
| RELB       | 0.06295 | 0.42183 | 0.126 | 0.19 | 1 | MS.Trt_vs_MS.NoTrt_F |
| TBRG1      | 0.06296 | 0.26155 | 0.651 | 0.74 | 1 | MS.Trt_vs_MS.NoTrt_F |
| USP32      | 0.063   | 1.80856 | 0.277 | 0.37 | 1 | MS.Trt_vs_MS.NoTrt_F |
| HSD17B1    | 0.06336 | -0.4525 | 0.766 | 0.82 | 1 | MS.Trt_vs_MS.NoTrt_F |
| ESCO1      | 0.06337 | 0.69724 | 0.378 | 0.51 | 1 | MS.Trt_vs_MS.NoTrt_F |
| ZEB2       | 0.06343 | 2.39712 | 0.694 | 0.61 | 1 | MS.Trt_vs_MS.NoTrt_F |
| ITGB1BP1   | 0.06355 | 0.72392 | 0.219 | 0.31 | 1 | MS.Trt_vs_MS.NoTrt_F |
| PALLD      | 0.06376 | 0.25259 | 0.317 | 0.41 | 1 | MS.Trt_vs_MS.NoTrt_F |
| SPACA6     | 0.064   | 0.36857 | 0.881 | 0.91 | 1 | MS.Trt_vs_MS.NoTrt_F |
| RRM2B      | 0.06401 | -0.9429 | 0.165 | 0.24 | 1 | MS.Trt_vs_MS.NoTrt_F |
| CCNK       | 0.06407 | 0.48904 | 0.259 | 0.35 | 1 | MS.Trt_vs_MS.NoTrt_F |
| CXorf23    | 0.06408 | -0.3236 | 0.698 | 0.79 | 1 | MS.Trt_vs_MS.NoTrt_F |



|          |         |         |       |      |                        |
|----------|---------|---------|-------|------|------------------------|
| ZSCAN12  | 0.06409 | 0.91056 | 0.493 | 0.4  | 1 MS.Trt_vs_MS.NoTrt_F |
| AARS     | 0.06422 | -0.5044 | 0.403 | 0.5  | 1 MS.Trt_vs_MS.NoTrt_F |
| TRNT1    | 0.06434 | -0.3629 | 0.281 | 0.36 | 1 MS.Trt_vs_MS.NoTrt_F |
| FITM2    | 0.0644  | -0.4432 | 0.673 | 0.75 | 1 MS.Trt_vs_MS.NoTrt_F |
| SLAIN2   | 0.06445 | 0.31384 | 0.212 | 0.3  | 1 MS.Trt_vs_MS.NoTrt_F |
| MIIP     | 0.06446 | 0.5064  | 0.187 | 0.28 | 1 MS.Trt_vs_MS.NoTrt_F |
| SLC10A1  | 0.06448 | 0.39844 | 0.061 | 0.11 | 1 MS.Trt_vs_MS.NoTrt_F |
| ZNF552   | 0.06471 | -0.6353 | 0.432 | 0.5  | 1 MS.Trt_vs_MS.NoTrt_F |
| SNURF    | 0.06496 | 0.42311 | 0.176 | 0.25 | 1 MS.Trt_vs_MS.NoTrt_F |
| SARM1    | 0.06516 | 0.9     | 0.417 | 0.51 | 1 MS.Trt_vs_MS.NoTrt_F |
| MIEF2    | 0.06531 | -0.4049 | 0.457 | 0.56 | 1 MS.Trt_vs_MS.NoTrt_F |
| VIPR1    | 0.06531 | 0.50841 | 0.086 | 0.14 | 1 MS.Trt_vs_MS.NoTrt_F |
| THNSL1   | 0.06548 | 1.42816 | 0.119 | 0.19 | 1 MS.Trt_vs_MS.NoTrt_F |
| IGF2R    | 0.06554 | 0.49035 | 0.41  | 0.51 | 1 MS.Trt_vs_MS.NoTrt_F |
| USP37    | 0.06555 | -0.9163 | 0.442 | 0.51 | 1 MS.Trt_vs_MS.NoTrt_F |
| FOXRED2  | 0.06557 | 0.61444 | 0.504 | 0.6  | 1 MS.Trt_vs_MS.NoTrt_F |
| FAM103A1 | 0.06558 | 0.70345 | 0.18  | 0.26 | 1 MS.Trt_vs_MS.NoTrt_F |
| GRINA    | 0.06562 | 0.49099 | 0.094 | 0.16 | 1 MS.Trt_vs_MS.NoTrt_F |
| NMI      | 0.06569 | -0.8887 | 0.306 | 0.38 | 1 MS.Trt_vs_MS.NoTrt_F |
| PDE6D    | 0.06577 | 0.38329 | 0.155 | 0.23 | 1 MS.Trt_vs_MS.NoTrt_F |
| TBPL1    | 0.0658  | 0.36981 | 0.245 | 0.33 | 1 MS.Trt_vs_MS.NoTrt_F |
| NT5C3B   | 0.06592 | -0.8163 | 0.612 | 0.7  | 1 MS.Trt_vs_MS.NoTrt_F |
| RINL     | 0.06598 | -0.6946 | 0.741 | 0.77 | 1 MS.Trt_vs_MS.NoTrt_F |
| EXOSC3   | 0.06629 | -0.469  | 0.392 | 0.46 | 1 MS.Trt_vs_MS.NoTrt_F |
| CBFB     | 0.06631 | 1.05832 | 0.173 | 0.26 | 1 MS.Trt_vs_MS.NoTrt_F |
| TET1     | 0.06638 | 0.5379  | 0.097 | 0.16 | 1 MS.Trt_vs_MS.NoTrt_F |
| DRC3     | 0.06646 | -0.39   | 0.565 | 0.65 | 1 MS.Trt_vs_MS.NoTrt_F |
| ERGIC2   | 0.06651 | -0.7273 | 0.471 | 0.55 | 1 MS.Trt_vs_MS.NoTrt_F |
| COMMD10  | 0.06657 | 0.27196 | 0.324 | 0.41 | 1 MS.Trt_vs_MS.NoTrt_F |
| ZNF665   | 0.06668 | 0.68262 | 0.917 | 0.95 | 1 MS.Trt_vs_MS.NoTrt_F |
| TRIM26   | 0.06673 | 0.54752 | 0.191 | 0.28 | 1 MS.Trt_vs_MS.NoTrt_F |
| GORAB    | 0.06676 | 0.32032 | 0.083 | 0.14 | 1 MS.Trt_vs_MS.NoTrt_F |
| SNX21    | 0.06683 | 0.76921 | 0.421 | 0.56 | 1 MS.Trt_vs_MS.NoTrt_F |
| DPYSL2   | 0.06689 | 0.36883 | 0.572 | 0.49 | 1 MS.Trt_vs_MS.NoTrt_F |
| RBM48    | 0.06698 | 0.57152 | 0.719 | 0.85 | 1 MS.Trt_vs_MS.NoTrt_F |
| RAB40B   | 0.06704 | 0.26291 | 0.525 | 0.62 | 1 MS.Trt_vs_MS.NoTrt_F |
| MTRF1L   | 0.06709 | 1.02486 | 0.094 | 0.16 | 1 MS.Trt_vs_MS.NoTrt_F |
| CLSTN3   | 0.06712 | 0.27702 | 0.183 | 0.27 | 1 MS.Trt_vs_MS.NoTrt_F |
| MAP4K5   | 0.06714 | -0.6613 | 0.482 | 0.57 | 1 MS.Trt_vs_MS.NoTrt_F |
| LIN7C    | 0.06731 | -0.2998 | 0.388 | 0.45 | 1 MS.Trt_vs_MS.NoTrt_F |

|            |         |         |       |      |                        |
|------------|---------|---------|-------|------|------------------------|
| UQCR10     | 0.06734 | 0.84009 | 0.342 | 0.48 | 1 MS.Trt_vs_MS.NoTrt_F |
| WDR46      | 0.06735 | 0.95118 | 0.122 | 0.19 | 1 MS.Trt_vs_MS.NoTrt_F |
| ARF4       | 0.06736 | 0.54053 | 0.209 | 0.29 | 1 MS.Trt_vs_MS.NoTrt_F |
| CASD1      | 0.0674  | 0.73964 | 0.083 | 0.14 | 1 MS.Trt_vs_MS.NoTrt_F |
| CYP20A1    | 0.06743 | -0.2908 | 0.896 | 0.92 | 1 MS.Trt_vs_MS.NoTrt_F |
| ZNF333     | 0.0677  | 0.71904 | 0.885 | 0.94 | 1 MS.Trt_vs_MS.NoTrt_F |
| TRIM45     | 0.06778 | -0.6088 | 0.112 | 0.17 | 1 MS.Trt_vs_MS.NoTrt_F |
| ACOX3      | 0.06799 | 0.40594 | 0.133 | 0.2  | 1 MS.Trt_vs_MS.NoTrt_F |
| SCP2       | 0.06801 | 0.79147 | 0.277 | 0.39 | 1 MS.Trt_vs_MS.NoTrt_F |
| RPS6KB2    | 0.06803 | -0.5591 | 0.853 | 0.87 | 1 MS.Trt_vs_MS.NoTrt_F |
| PLEKHA3    | 0.06808 | -0.395  | 0.763 | 0.81 | 1 MS.Trt_vs_MS.NoTrt_F |
| SMIM12     | 0.0681  | -0.3376 | 0.737 | 0.79 | 1 MS.Trt_vs_MS.NoTrt_F |
| SH3PXD2A   | 0.06814 | -0.3086 | 0.309 | 0.39 | 1 MS.Trt_vs_MS.NoTrt_F |
| DNPH1      | 0.06818 | 0.99831 | 0.212 | 0.32 | 1 MS.Trt_vs_MS.NoTrt_F |
| EDC3       | 0.06831 | 0.35438 | 0.371 | 0.46 | 1 MS.Trt_vs_MS.NoTrt_F |
| MRPL46     | 0.06834 | -0.4318 | 0.252 | 0.33 | 1 MS.Trt_vs_MS.NoTrt_F |
| NOP56      | 0.06841 | 0.64525 | 0.453 | 0.55 | 1 MS.Trt_vs_MS.NoTrt_F |
| RASAL3     | 0.06846 | 0.45417 | 0.219 | 0.32 | 1 MS.Trt_vs_MS.NoTrt_F |
| STEAP3     | 0.06847 | -0.7891 | 0.162 | 0.23 | 1 MS.Trt_vs_MS.NoTrt_F |
| CLCN5      | 0.0685  | -0.3486 | 0.277 | 0.37 | 1 MS.Trt_vs_MS.NoTrt_F |
| MYO10      | 0.0685  | -0.2901 | 0.619 | 0.71 | 1 MS.Trt_vs_MS.NoTrt_F |
| DNMBP      | 0.06865 | 1.09817 | 0.09  | 0.14 | 1 MS.Trt_vs_MS.NoTrt_F |
| SLC25A14   | 0.06868 | -0.49   | 0.263 | 0.35 | 1 MS.Trt_vs_MS.NoTrt_F |
| TMEM138    | 0.06868 | -0.5965 | 0.806 | 0.86 | 1 MS.Trt_vs_MS.NoTrt_F |
| RP11-244H3 | 0.06876 | 0.86753 | 0.108 | 0.17 | 1 MS.Trt_vs_MS.NoTrt_F |
| PCGF6      | 0.06895 | -0.4182 | 0.644 | 0.79 | 1 MS.Trt_vs_MS.NoTrt_F |
| AC138645.2 | 0.06899 | -0.3001 | 0.151 | 0.22 | 1 MS.Trt_vs_MS.NoTrt_F |
| MOB4       | 0.06899 | -0.4007 | 0.378 | 0.44 | 1 MS.Trt_vs_MS.NoTrt_F |
| HRH2       | 0.06911 | -1.0327 | 0.115 | 0.17 | 1 MS.Trt_vs_MS.NoTrt_F |
| CEP83      | 0.06913 | -0.4512 | 0.647 | 0.69 | 1 MS.Trt_vs_MS.NoTrt_F |
| EIF2AK2    | 0.06921 | 0.30336 | 0.773 | 0.85 | 1 MS.Trt_vs_MS.NoTrt_F |
| PDZD2      | 0.06924 | 0.64793 | 0.705 | 0.66 | 1 MS.Trt_vs_MS.NoTrt_F |
| MYLIP      | 0.06925 | 0.75536 | 0.104 | 0.17 | 1 MS.Trt_vs_MS.NoTrt_F |
| AMACR      | 0.06936 | -0.4537 | 0.101 | 0.16 | 1 MS.Trt_vs_MS.NoTrt_F |
| DIMT1      | 0.06938 | 0.80276 | 0.147 | 0.23 | 1 MS.Trt_vs_MS.NoTrt_F |
| DARS       | 0.06942 | 0.51293 | 0.331 | 0.44 | 1 MS.Trt_vs_MS.NoTrt_F |
| NUP54      | 0.06942 | 0.3562  | 0.194 | 0.27 | 1 MS.Trt_vs_MS.NoTrt_F |
| METRNL     | 0.06959 | 1.09929 | 0.119 | 0.18 | 1 MS.Trt_vs_MS.NoTrt_F |
| TMEM255B   | 0.0699  | 0.66382 | 0.176 | 0.25 | 1 MS.Trt_vs_MS.NoTrt_F |
| GATAD2A    | 0.07005 | 0.48734 | 0.655 | 0.77 | 1 MS.Trt_vs_MS.NoTrt_F |

|             |         |         |       |      |                        |
|-------------|---------|---------|-------|------|------------------------|
| FAM179B     | 0.07014 | 0.4635  | 0.755 | 0.87 | 1 MS.Trt_vs_MS.NoTrt_F |
| MYCBPAP     | 0.0702  | -0.417  | 0.791 | 0.89 | 1 MS.Trt_vs_MS.NoTrt_F |
| NCAPH2      | 0.07023 | 0.34265 | 0.712 | 0.81 | 1 MS.Trt_vs_MS.NoTrt_F |
| CPNE8       | 0.07023 | 0.62009 | 0.151 | 0.23 | 1 MS.Trt_vs_MS.NoTrt_F |
| TMEM116     | 0.07033 | -0.5656 | 0.871 | 0.91 | 1 MS.Trt_vs_MS.NoTrt_F |
| MPI         | 0.0704  | 0.52734 | 0.468 | 0.56 | 1 MS.Trt_vs_MS.NoTrt_F |
| TNS1        | 0.07046 | -1.1693 | 0.23  | 0.31 | 1 MS.Trt_vs_MS.NoTrt_F |
| YTHDC2      | 0.07046 | 0.52021 | 0.406 | 0.51 | 1 MS.Trt_vs_MS.NoTrt_F |
| FRMD8       | 0.07052 | 0.73642 | 0.644 | 0.58 | 1 MS.Trt_vs_MS.NoTrt_F |
| KIAA2013    | 0.07054 | 0.51302 | 0.284 | 0.37 | 1 MS.Trt_vs_MS.NoTrt_F |
| ZNF91       | 0.07073 | 0.36562 | 0.727 | 0.82 | 1 MS.Trt_vs_MS.NoTrt_F |
| FBXW4       | 0.07081 | 0.52688 | 0.446 | 0.56 | 1 MS.Trt_vs_MS.NoTrt_F |
| MIEN1       | 0.071   | 0.79205 | 0.169 | 0.25 | 1 MS.Trt_vs_MS.NoTrt_F |
| SMARCC1     | 0.07109 | -0.4873 | 0.442 | 0.51 | 1 MS.Trt_vs_MS.NoTrt_F |
| VWF         | 0.07127 | 0.35477 | 0.079 | 0.13 | 1 MS.Trt_vs_MS.NoTrt_F |
| FAM101B     | 0.07128 | 1.19368 | 0.288 | 0.4  | 1 MS.Trt_vs_MS.NoTrt_F |
| LYZ         | 0.0713  | 0.97044 | 0.371 | 0.48 | 1 MS.Trt_vs_MS.NoTrt_F |
| VCL         | 0.07152 | 0.45041 | 0.144 | 0.22 | 1 MS.Trt_vs_MS.NoTrt_F |
| TEN1        | 0.07161 | -0.7201 | 0.327 | 0.41 | 1 MS.Trt_vs_MS.NoTrt_F |
| PAPD5       | 0.07168 | -0.5355 | 0.205 | 0.28 | 1 MS.Trt_vs_MS.NoTrt_F |
| NFYA        | 0.07185 | 0.71579 | 0.144 | 0.22 | 1 MS.Trt_vs_MS.NoTrt_F |
| KSR1        | 0.07203 | 0.83847 | 0.288 | 0.38 | 1 MS.Trt_vs_MS.NoTrt_F |
| RDH14       | 0.07205 | 1.0108  | 0.079 | 0.13 | 1 MS.Trt_vs_MS.NoTrt_F |
| RMND1       | 0.07205 | -0.3703 | 0.068 | 0.12 | 1 MS.Trt_vs_MS.NoTrt_F |
| IL3RA       | 0.07222 | 0.51934 | 0.101 | 0.16 | 1 MS.Trt_vs_MS.NoTrt_F |
| NCMAP       | 0.07233 | 0.32937 | 0.687 | 0.64 | 1 MS.Trt_vs_MS.NoTrt_F |
| POT1        | 0.07255 | 0.51382 | 0.119 | 0.18 | 1 MS.Trt_vs_MS.NoTrt_F |
| SYNGR2      | 0.07316 | 0.2637  | 0.525 | 0.62 | 1 MS.Trt_vs_MS.NoTrt_F |
| UQCC1       | 0.07328 | -0.3435 | 0.496 | 0.6  | 1 MS.Trt_vs_MS.NoTrt_F |
| INSR        | 0.07345 | 0.42481 | 0.439 | 0.51 | 1 MS.Trt_vs_MS.NoTrt_F |
| LAMB1       | 0.07351 | 0.34328 | 0.284 | 0.38 | 1 MS.Trt_vs_MS.NoTrt_F |
| RPA1        | 0.07359 | 0.30366 | 0.263 | 0.35 | 1 MS.Trt_vs_MS.NoTrt_F |
| CTD-314811C | 0.0737  | 0.55949 | 0.115 | 0.18 | 1 MS.Trt_vs_MS.NoTrt_F |
| WDR5        | 0.07374 | 0.27386 | 0.14  | 0.21 | 1 MS.Trt_vs_MS.NoTrt_F |
| B4GALT4     | 0.07379 | -0.3527 | 0.647 | 0.68 | 1 MS.Trt_vs_MS.NoTrt_F |
| ATF5        | 0.07395 | 0.41971 | 0.263 | 0.36 | 1 MS.Trt_vs_MS.NoTrt_F |
| GATS        | 0.07399 | -0.3757 | 0.32  | 0.41 | 1 MS.Trt_vs_MS.NoTrt_F |
| GSTM1       | 0.07402 | 1.1576  | 0.183 | 0.27 | 1 MS.Trt_vs_MS.NoTrt_F |
| DPM3        | 0.07429 | 0.73018 | 0.079 | 0.13 | 1 MS.Trt_vs_MS.NoTrt_F |
| KRBA1       | 0.07444 | -0.8521 | 0.068 | 0.12 | 1 MS.Trt_vs_MS.NoTrt_F |

|           |         |         |       |      |                        |
|-----------|---------|---------|-------|------|------------------------|
| SEC24D    | 0.07446 | 0.41744 | 0.522 | 0.6  | 1 MS.Trt_vs_MS.NoTrt_F |
| CDYL      | 0.07459 | -0.4447 | 0.097 | 0.16 | 1 MS.Trt_vs_MS.NoTrt_F |
| SLC44A1   | 0.07467 | -1.4273 | 0.658 | 0.71 | 1 MS.Trt_vs_MS.NoTrt_F |
| MEX3C     | 0.07481 | 0.64909 | 0.104 | 0.17 | 1 MS.Trt_vs_MS.NoTrt_F |
| C6orf163  | 0.07487 | 0.52956 | 0.421 | 0.54 | 1 MS.Trt_vs_MS.NoTrt_F |
| ZBTB40    | 0.07488 | -0.3557 | 0.403 | 0.48 | 1 MS.Trt_vs_MS.NoTrt_F |
| FAM213B   | 0.07496 | 0.38717 | 0.122 | 0.19 | 1 MS.Trt_vs_MS.NoTrt_F |
| FBXO6     | 0.07497 | 0.62734 | 0.716 | 0.65 | 1 MS.Trt_vs_MS.NoTrt_F |
| CSNK1E    | 0.07503 | -0.3711 | 0.676 | 0.78 | 1 MS.Trt_vs_MS.NoTrt_F |
| ZXDC      | 0.07511 | -0.5858 | 0.108 | 0.17 | 1 MS.Trt_vs_MS.NoTrt_F |
| KIF2A     | 0.07527 | 0.7431  | 0.252 | 0.35 | 1 MS.Trt_vs_MS.NoTrt_F |
| LMNB1     | 0.07529 | 0.26425 | 0.126 | 0.19 | 1 MS.Trt_vs_MS.NoTrt_F |
| TLK1      | 0.07538 | 0.55434 | 0.788 | 0.86 | 1 MS.Trt_vs_MS.NoTrt_F |
| RNASEL    | 0.07544 | 0.54214 | 0.345 | 0.45 | 1 MS.Trt_vs_MS.NoTrt_F |
| NCR1      | 0.07547 | 0.76799 | 0.205 | 0.28 | 1 MS.Trt_vs_MS.NoTrt_F |
| MOB3C     | 0.07547 | 2.46341 | 0.079 | 0.13 | 1 MS.Trt_vs_MS.NoTrt_F |
| CMAS      | 0.07552 | 0.35693 | 0.119 | 0.18 | 1 MS.Trt_vs_MS.NoTrt_F |
| FBXO8     | 0.07553 | 0.9535  | 0.104 | 0.17 | 1 MS.Trt_vs_MS.NoTrt_F |
| NDUFB1    | 0.07561 | 0.39362 | 0.719 | 0.85 | 1 MS.Trt_vs_MS.NoTrt_F |
| C1orf52   | 0.07564 | -0.6378 | 0.295 | 0.38 | 1 MS.Trt_vs_MS.NoTrt_F |
| TRIM52    | 0.07571 | 0.54173 | 0.86  | 0.81 | 1 MS.Trt_vs_MS.NoTrt_F |
| NUDT19    | 0.07591 | 0.62969 | 0.892 | 0.93 | 1 MS.Trt_vs_MS.NoTrt_F |
| CPT2      | 0.07597 | -0.2756 | 0.727 | 0.78 | 1 MS.Trt_vs_MS.NoTrt_F |
| FAM208B   | 0.07615 | 0.60652 | 0.277 | 0.38 | 1 MS.Trt_vs_MS.NoTrt_F |
| MS4A15    | 0.07616 | -0.2662 | 0.068 | 0.12 | 1 MS.Trt_vs_MS.NoTrt_F |
| AKR1C3    | 0.07628 | -0.9273 | 0.065 | 0.11 | 1 MS.Trt_vs_MS.NoTrt_F |
| CSNK1D    | 0.07648 | -0.2967 | 0.921 | 0.96 | 1 MS.Trt_vs_MS.NoTrt_F |
| ABHD10    | 0.07651 | 0.27508 | 0.137 | 0.2  | 1 MS.Trt_vs_MS.NoTrt_F |
| PPP1R8    | 0.07658 | 0.49101 | 0.076 | 0.13 | 1 MS.Trt_vs_MS.NoTrt_F |
| ICA1      | 0.07661 | 0.8874  | 0.612 | 0.56 | 1 MS.Trt_vs_MS.NoTrt_F |
| SLC7A6OS  | 0.07665 | 0.41387 | 0.216 | 0.3  | 1 MS.Trt_vs_MS.NoTrt_F |
| DHX35     | 0.07678 | -0.8707 | 0.385 | 0.45 | 1 MS.Trt_vs_MS.NoTrt_F |
| ALG13     | 0.07684 | 0.29049 | 0.338 | 0.43 | 1 MS.Trt_vs_MS.NoTrt_F |
| ARHGEF40  | 0.07688 | 0.32017 | 0.18  | 0.25 | 1 MS.Trt_vs_MS.NoTrt_F |
| IMPDH1    | 0.07693 | 0.38183 | 0.165 | 0.24 | 1 MS.Trt_vs_MS.NoTrt_F |
| CLTC      | 0.0771  | -0.3766 | 0.374 | 0.44 | 1 MS.Trt_vs_MS.NoTrt_F |
| TRIM5     | 0.07714 | 0.57917 | 0.468 | 0.56 | 1 MS.Trt_vs_MS.NoTrt_F |
| HIST1H2AC | 0.07746 | 0.88571 | 0.079 | 0.13 | 1 MS.Trt_vs_MS.NoTrt_F |
| CTNS      | 0.07754 | -0.4635 | 0.155 | 0.22 | 1 MS.Trt_vs_MS.NoTrt_F |
| GALNT15   | 0.07769 | 0.70049 | 0.277 | 0.38 | 1 MS.Trt_vs_MS.NoTrt_F |

|             |         |         |       |      |                        |
|-------------|---------|---------|-------|------|------------------------|
| KCNAB1      | 0.0778  | 1.33446 | 0.079 | 0.13 | 1 MS.Trt_vs_MS.NoTrt_F |
| NR1H3       | 0.07781 | 0.70431 | 0.151 | 0.22 | 1 MS.Trt_vs_MS.NoTrt_F |
| ADHFE1      | 0.07793 | 0.57899 | 0.158 | 0.24 | 1 MS.Trt_vs_MS.NoTrt_F |
| MFGE8       | 0.07808 | -0.8546 | 0.547 | 0.62 | 1 MS.Trt_vs_MS.NoTrt_F |
| PIH1D3      | 0.0782  | -0.3071 | 0.32  | 0.4  | 1 MS.Trt_vs_MS.NoTrt_F |
| ARHGEF12    | 0.0783  | 0.38501 | 0.96  | 0.98 | 1 MS.Trt_vs_MS.NoTrt_F |
| RGS13       | 0.07839 | 0.45259 | 0.399 | 0.57 | 1 MS.Trt_vs_MS.NoTrt_F |
| ZSCAN21     | 0.07844 | -0.5495 | 0.227 | 0.31 | 1 MS.Trt_vs_MS.NoTrt_F |
| CH507-9B2.! | 0.07846 | -0.5606 | 0.112 | 0.17 | 1 MS.Trt_vs_MS.NoTrt_F |
| MCM5        | 0.07861 | 0.34682 | 0.216 | 0.29 | 1 MS.Trt_vs_MS.NoTrt_F |
| ELOVL1      | 0.07876 | 0.63047 | 0.18  | 0.26 | 1 MS.Trt_vs_MS.NoTrt_F |
| SMAD3       | 0.07892 | 0.56007 | 0.169 | 0.25 | 1 MS.Trt_vs_MS.NoTrt_F |
| ETV7        | 0.07896 | -0.2604 | 0.068 | 0.12 | 1 MS.Trt_vs_MS.NoTrt_F |
| SOX4        | 0.07913 | 1.50229 | 0.097 | 0.16 | 1 MS.Trt_vs_MS.NoTrt_F |
| OSTM1       | 0.07946 | -0.4666 | 0.82  | 0.85 | 1 MS.Trt_vs_MS.NoTrt_F |
| EGFL8       | 0.07958 | -0.4459 | 0.547 | 0.65 | 1 MS.Trt_vs_MS.NoTrt_F |
| PAXBP1      | 0.07961 | 0.3641  | 0.205 | 0.29 | 1 MS.Trt_vs_MS.NoTrt_F |
| SLC9A6      | 0.07961 | -0.3828 | 0.428 | 0.54 | 1 MS.Trt_vs_MS.NoTrt_F |
| PRPF19      | 0.07973 | -0.4133 | 0.094 | 0.15 | 1 MS.Trt_vs_MS.NoTrt_F |
| NPIPA8      | 0.07984 | -0.3152 | 0.068 | 0.12 | 1 MS.Trt_vs_MS.NoTrt_F |
| FBXO9       | 0.08033 | -0.5148 | 0.809 | 0.84 | 1 MS.Trt_vs_MS.NoTrt_F |
| KMT5B       | 0.08033 | 0.63787 | 0.324 | 0.4  | 1 MS.Trt_vs_MS.NoTrt_F |
| ADCY9       | 0.0804  | 0.74057 | 0.288 | 0.38 | 1 MS.Trt_vs_MS.NoTrt_F |
| MTIF3       | 0.08058 | 0.63761 | 0.223 | 0.32 | 1 MS.Trt_vs_MS.NoTrt_F |
| BRD7        | 0.08076 | 0.75122 | 0.54  | 0.63 | 1 MS.Trt_vs_MS.NoTrt_F |
| ACAP3       | 0.08084 | -0.2507 | 0.133 | 0.19 | 1 MS.Trt_vs_MS.NoTrt_F |
| OSTC        | 0.08088 | 0.57444 | 0.266 | 0.36 | 1 MS.Trt_vs_MS.NoTrt_F |
| WIZ         | 0.08101 | -0.3532 | 0.313 | 0.4  | 1 MS.Trt_vs_MS.NoTrt_F |
| CDRT4       | 0.08106 | 0.37253 | 0.129 | 0.19 | 1 MS.Trt_vs_MS.NoTrt_F |
| ZC3H12C     | 0.08117 | -0.9244 | 0.097 | 0.15 | 1 MS.Trt_vs_MS.NoTrt_F |
| FAXDC2      | 0.08124 | 0.31279 | 0.849 | 0.82 | 1 MS.Trt_vs_MS.NoTrt_F |
| ITGAV       | 0.08142 | 0.89055 | 0.115 | 0.18 | 1 MS.Trt_vs_MS.NoTrt_F |
| ZNF223      | 0.08147 | 1.45805 | 0.119 | 0.18 | 1 MS.Trt_vs_MS.NoTrt_F |
| RNF170      | 0.08149 | -0.6884 | 0.55  | 0.64 | 1 MS.Trt_vs_MS.NoTrt_F |
| C11orf80    | 0.08154 | 0.52659 | 0.482 | 0.56 | 1 MS.Trt_vs_MS.NoTrt_F |
| MRPL19      | 0.08162 | 0.54111 | 0.273 | 0.36 | 1 MS.Trt_vs_MS.NoTrt_F |
| KLC2        | 0.08169 | 0.32413 | 0.108 | 0.17 | 1 MS.Trt_vs_MS.NoTrt_F |
| AD000671.6  | 0.08169 | 0.31544 | 0.126 | 0.19 | 1 MS.Trt_vs_MS.NoTrt_F |
| ERCC1       | 0.08174 | 0.36434 | 0.777 | 0.81 | 1 MS.Trt_vs_MS.NoTrt_F |
| ZFHX3       | 0.08182 | 0.28139 | 0.158 | 0.23 | 1 MS.Trt_vs_MS.NoTrt_F |

|            |         |         |       |      |   |                      |
|------------|---------|---------|-------|------|---|----------------------|
| WRAP53     | 0.08187 | 0.3827  | 0.072 | 0.12 | 1 | MS.Trt_vs_MS.NoTrt_F |
| EDF1       | 0.08198 | 0.39307 | 0.417 | 0.58 | 1 | MS.Trt_vs_MS.NoTrt_F |
| ARFGAP2    | 0.08217 | -0.3665 | 0.522 | 0.64 | 1 | MS.Trt_vs_MS.NoTrt_F |
| CDK2AP2    | 0.08218 | 0.31961 | 0.245 | 0.34 | 1 | MS.Trt_vs_MS.NoTrt_F |
| FGF1       | 0.08226 | 1.14669 | 0.086 | 0.14 | 1 | MS.Trt_vs_MS.NoTrt_F |
| SIL1       | 0.08238 | 0.36959 | 0.122 | 0.18 | 1 | MS.Trt_vs_MS.NoTrt_F |
| CRELD2     | 0.0825  | 0.38186 | 0.601 | 0.67 | 1 | MS.Trt_vs_MS.NoTrt_F |
| RNPC3      | 0.0827  | 0.63113 | 0.302 | 0.4  | 1 | MS.Trt_vs_MS.NoTrt_F |
| TMEM106A   | 0.08278 | -0.3246 | 0.651 | 0.7  | 1 | MS.Trt_vs_MS.NoTrt_F |
| ELMO2      | 0.08279 | 0.47318 | 0.212 | 0.29 | 1 | MS.Trt_vs_MS.NoTrt_F |
| ILKAP      | 0.08305 | 0.25149 | 0.597 | 0.72 | 1 | MS.Trt_vs_MS.NoTrt_F |
| INTS2      | 0.0832  | -0.5428 | 0.266 | 0.34 | 1 | MS.Trt_vs_MS.NoTrt_F |
| KIF5C      | 0.08346 | -1.0081 | 0.068 | 0.12 | 1 | MS.Trt_vs_MS.NoTrt_F |
| CTPS2      | 0.08349 | 0.75657 | 0.108 | 0.17 | 1 | MS.Trt_vs_MS.NoTrt_F |
| CTSW       | 0.08357 | 1.0813  | 0.669 | 0.61 | 1 | MS.Trt_vs_MS.NoTrt_F |
| GALNT8     | 0.08358 | 0.98109 | 0.065 | 0.11 | 1 | MS.Trt_vs_MS.NoTrt_F |
| GDAP1      | 0.08366 | 0.66404 | 0.108 | 0.17 | 1 | MS.Trt_vs_MS.NoTrt_F |
| TRAPPC6B   | 0.08367 | -0.5747 | 0.518 | 0.59 | 1 | MS.Trt_vs_MS.NoTrt_F |
| ERCC5      | 0.08372 | 0.46843 | 0.392 | 0.48 | 1 | MS.Trt_vs_MS.NoTrt_F |
| MRPL21     | 0.0839  | 0.53465 | 0.126 | 0.19 | 1 | MS.Trt_vs_MS.NoTrt_F |
| MORN4      | 0.08391 | -0.3941 | 0.525 | 0.65 | 1 | MS.Trt_vs_MS.NoTrt_F |
| STX12      | 0.08401 | 0.59739 | 0.266 | 0.35 | 1 | MS.Trt_vs_MS.NoTrt_F |
| AKR1C2     | 0.0841  | -0.688  | 0.104 | 0.16 | 1 | MS.Trt_vs_MS.NoTrt_F |
| TMEM44     | 0.08419 | -0.4621 | 0.55  | 0.64 | 1 | MS.Trt_vs_MS.NoTrt_F |
| ZCRB1      | 0.08439 | 0.8532  | 0.18  | 0.26 | 1 | MS.Trt_vs_MS.NoTrt_F |
| BUD13      | 0.08441 | 1.0421  | 0.112 | 0.17 | 1 | MS.Trt_vs_MS.NoTrt_F |
| CPM        | 0.08448 | 0.56287 | 0.799 | 0.77 | 1 | MS.Trt_vs_MS.NoTrt_F |
| MGME1      | 0.08453 | 0.30394 | 0.112 | 0.17 | 1 | MS.Trt_vs_MS.NoTrt_F |
| TMEM117    | 0.08454 | 0.77616 | 0.097 | 0.16 | 1 | MS.Trt_vs_MS.NoTrt_F |
| ENO3       | 0.08458 | 0.36659 | 0.5   | 0.59 | 1 | MS.Trt_vs_MS.NoTrt_F |
| CDC7       | 0.08474 | 0.26849 | 0.068 | 0.12 | 1 | MS.Trt_vs_MS.NoTrt_F |
| ZNF589     | 0.08494 | 0.69866 | 0.45  | 0.55 | 1 | MS.Trt_vs_MS.NoTrt_F |
| TCAF1      | 0.08505 | -0.937  | 0.338 | 0.41 | 1 | MS.Trt_vs_MS.NoTrt_F |
| SLC26A6    | 0.08507 | 0.6607  | 0.108 | 0.17 | 1 | MS.Trt_vs_MS.NoTrt_F |
| MSTO1      | 0.08526 | 1.39429 | 0.112 | 0.18 | 1 | MS.Trt_vs_MS.NoTrt_F |
| C2orf69    | 0.08536 | 0.56644 | 0.259 | 0.35 | 1 | MS.Trt_vs_MS.NoTrt_F |
| RNF25      | 0.08539 | 0.29029 | 0.112 | 0.17 | 1 | MS.Trt_vs_MS.NoTrt_F |
| SBF2       | 0.08567 | 0.3482  | 0.946 | 0.97 | 1 | MS.Trt_vs_MS.NoTrt_F |
| NDFIP2     | 0.08585 | 0.33562 | 0.205 | 0.28 | 1 | MS.Trt_vs_MS.NoTrt_F |
| RP11-295P9 | 0.08594 | 0.27151 | 0.126 | 0.19 | 1 | MS.Trt_vs_MS.NoTrt_F |

|           |         |         |       |      |   |                      |
|-----------|---------|---------|-------|------|---|----------------------|
| IFI44     | 0.08615 | 0.79449 | 0.09  | 0.14 | 1 | MS.Trt_vs_MS.NoTrt_F |
| ZNF394    | 0.08621 | -0.7822 | 0.547 | 0.61 | 1 | MS.Trt_vs_MS.NoTrt_F |
| FAHD2A    | 0.08621 | 0.7459  | 0.165 | 0.24 | 1 | MS.Trt_vs_MS.NoTrt_F |
| DOCK11    | 0.08622 | 0.44014 | 0.543 | 0.73 | 1 | MS.Trt_vs_MS.NoTrt_F |
| SCNM1     | 0.08627 | -0.4382 | 0.723 | 0.78 | 1 | MS.Trt_vs_MS.NoTrt_F |
| KIAA0232  | 0.08633 | 0.6955  | 0.119 | 0.18 | 1 | MS.Trt_vs_MS.NoTrt_F |
| CFAP70    | 0.08639 | -0.8527 | 0.281 | 0.35 | 1 | MS.Trt_vs_MS.NoTrt_F |
| CHKA      | 0.08663 | 0.92679 | 0.072 | 0.12 | 1 | MS.Trt_vs_MS.NoTrt_F |
| H2AFJ     | 0.08679 | 0.40104 | 0.129 | 0.19 | 1 | MS.Trt_vs_MS.NoTrt_F |
| CARHSP1   | 0.08686 | -0.5702 | 0.705 | 0.72 | 1 | MS.Trt_vs_MS.NoTrt_F |
| TMBIM4    | 0.0869  | 0.36185 | 0.82  | 0.87 | 1 | MS.Trt_vs_MS.NoTrt_F |
| STAMBPL1  | 0.08693 | -0.2667 | 0.5   | 0.59 | 1 | MS.Trt_vs_MS.NoTrt_F |
| FNTB      | 0.087   | -0.398  | 0.169 | 0.24 | 1 | MS.Trt_vs_MS.NoTrt_F |
| RCCD1     | 0.08706 | -0.9733 | 0.198 | 0.27 | 1 | MS.Trt_vs_MS.NoTrt_F |
| DECR1     | 0.08713 | 0.29336 | 0.478 | 0.59 | 1 | MS.Trt_vs_MS.NoTrt_F |
| GTPBP4    | 0.08714 | -1.004  | 0.489 | 0.57 | 1 | MS.Trt_vs_MS.NoTrt_F |
| LINC00371 | 0.08718 | -0.2929 | 0.144 | 0.21 | 1 | MS.Trt_vs_MS.NoTrt_F |
| PSMA2     | 0.08722 | 0.53594 | 0.586 | 0.66 | 1 | MS.Trt_vs_MS.NoTrt_F |
| GALNS     | 0.08734 | 0.50041 | 0.532 | 0.61 | 1 | MS.Trt_vs_MS.NoTrt_F |
| CCDC117   | 0.08735 | 0.66106 | 0.367 | 0.45 | 1 | MS.Trt_vs_MS.NoTrt_F |
| RCOR3     | 0.08738 | -0.253  | 0.403 | 0.48 | 1 | MS.Trt_vs_MS.NoTrt_F |
| COQ3      | 0.08744 | 0.59956 | 0.252 | 0.33 | 1 | MS.Trt_vs_MS.NoTrt_F |
| ZNF165    | 0.0875  | 1.77211 | 0.068 | 0.12 | 1 | MS.Trt_vs_MS.NoTrt_F |
| EGLN1     | 0.08754 | 0.3134  | 0.374 | 0.45 | 1 | MS.Trt_vs_MS.NoTrt_F |
| MYO1D     | 0.08769 | 0.38663 | 0.165 | 0.23 | 1 | MS.Trt_vs_MS.NoTrt_F |
| ACSL1     | 0.0879  | 0.59353 | 0.23  | 0.29 | 1 | MS.Trt_vs_MS.NoTrt_F |
| ARHGEF11  | 0.08794 | 0.71764 | 0.09  | 0.14 | 1 | MS.Trt_vs_MS.NoTrt_F |
| NOS3      | 0.08807 | -0.7895 | 0.335 | 0.43 | 1 | MS.Trt_vs_MS.NoTrt_F |
| KLHL9     | 0.08813 | -0.4458 | 0.381 | 0.46 | 1 | MS.Trt_vs_MS.NoTrt_F |
| IFIT2     | 0.08832 | -0.4547 | 0.094 | 0.15 | 1 | MS.Trt_vs_MS.NoTrt_F |
| JADE2     | 0.08835 | 0.37185 | 0.187 | 0.27 | 1 | MS.Trt_vs_MS.NoTrt_F |
| CAPN3     | 0.08838 | -0.662  | 0.083 | 0.13 | 1 | MS.Trt_vs_MS.NoTrt_F |
| TMEM263   | 0.08839 | 0.50166 | 0.388 | 0.46 | 1 | MS.Trt_vs_MS.NoTrt_F |
| FOXN3     | 0.08848 | -0.374  | 0.881 | 0.95 | 1 | MS.Trt_vs_MS.NoTrt_F |
| TSN       | 0.08873 | 0.2531  | 0.36  | 0.44 | 1 | MS.Trt_vs_MS.NoTrt_F |
| LSM12     | 0.08881 | 0.44637 | 0.669 | 0.76 | 1 | MS.Trt_vs_MS.NoTrt_F |
| NUP85     | 0.08902 | 0.27865 | 0.428 | 0.53 | 1 | MS.Trt_vs_MS.NoTrt_F |
| LINC01125 | 0.08907 | 0.35213 | 0.96  | 0.96 | 1 | MS.Trt_vs_MS.NoTrt_F |
| WDR26     | 0.0891  | 0.39252 | 0.626 | 0.72 | 1 | MS.Trt_vs_MS.NoTrt_F |
| ETV4      | 0.08915 | -0.6535 | 0.097 | 0.15 | 1 | MS.Trt_vs_MS.NoTrt_F |

|           |         |         |       |      |   |                      |
|-----------|---------|---------|-------|------|---|----------------------|
| PPP3CB    | 0.08929 | 0.92183 | 0.129 | 0.19 | 1 | MS.Trt_vs_MS.NoTrt_F |
| PTPRJ     | 0.08929 | 0.3423  | 0.371 | 0.45 | 1 | MS.Trt_vs_MS.NoTrt_F |
| GALNT9    | 0.08942 | -0.3238 | 0.201 | 0.27 | 1 | MS.Trt_vs_MS.NoTrt_F |
| LSM7      | 0.08961 | 0.31485 | 0.637 | 0.71 | 1 | MS.Trt_vs_MS.NoTrt_F |
| RNF2      | 0.08964 | -0.3679 | 0.399 | 0.51 | 1 | MS.Trt_vs_MS.NoTrt_F |
| FLOT1     | 0.0897  | 0.51948 | 0.144 | 0.22 | 1 | MS.Trt_vs_MS.NoTrt_F |
| SLC20A1   | 0.08971 | 0.46345 | 0.237 | 0.34 | 1 | MS.Trt_vs_MS.NoTrt_F |
| BPGM      | 0.08972 | 0.49259 | 0.094 | 0.15 | 1 | MS.Trt_vs_MS.NoTrt_F |
| SULT1A2   | 0.08977 | 0.25516 | 0.201 | 0.28 | 1 | MS.Trt_vs_MS.NoTrt_F |
| TRAF7     | 0.08988 | 0.88949 | 0.165 | 0.24 | 1 | MS.Trt_vs_MS.NoTrt_F |
| HIST1H2AG | 0.08993 | 0.55621 | 0.338 | 0.42 | 1 | MS.Trt_vs_MS.NoTrt_F |
| NPL       | 0.09006 | -1.3931 | 0.266 | 0.34 | 1 | MS.Trt_vs_MS.NoTrt_F |
| FOXJ3     | 0.09019 | 0.33426 | 0.536 | 0.61 | 1 | MS.Trt_vs_MS.NoTrt_F |
| UTP14C    | 0.09053 | 0.38581 | 0.205 | 0.28 | 1 | MS.Trt_vs_MS.NoTrt_F |
| SPECC1    | 0.09061 | 0.48088 | 0.932 | 0.93 | 1 | MS.Trt_vs_MS.NoTrt_F |
| RNF135    | 0.09061 | 0.8745  | 0.281 | 0.37 | 1 | MS.Trt_vs_MS.NoTrt_F |
| SPEG      | 0.09076 | 0.46822 | 0.237 | 0.32 | 1 | MS.Trt_vs_MS.NoTrt_F |
| ABCG1     | 0.09083 | -0.266  | 0.432 | 0.5  | 1 | MS.Trt_vs_MS.NoTrt_F |
| RASSF2    | 0.09096 | 0.30411 | 0.356 | 0.45 | 1 | MS.Trt_vs_MS.NoTrt_F |
| FKBP11    | 0.09121 | -0.3341 | 0.701 | 0.76 | 1 | MS.Trt_vs_MS.NoTrt_F |
| STK11     | 0.0913  | -0.6022 | 0.381 | 0.47 | 1 | MS.Trt_vs_MS.NoTrt_F |
| ZNF512B   | 0.09137 | -0.8551 | 0.061 | 0.11 | 1 | MS.Trt_vs_MS.NoTrt_F |
| METTL9    | 0.09138 | 0.62872 | 0.586 | 0.7  | 1 | MS.Trt_vs_MS.NoTrt_F |
| HSD17B4   | 0.0914  | 0.35044 | 0.594 | 0.7  | 1 | MS.Trt_vs_MS.NoTrt_F |
| TCEA2     | 0.09143 | -0.57   | 0.061 | 0.11 | 1 | MS.Trt_vs_MS.NoTrt_F |
| LRP10     | 0.09156 | 0.31762 | 0.759 | 0.82 | 1 | MS.Trt_vs_MS.NoTrt_F |
| CLOCK     | 0.09165 | 0.84294 | 0.183 | 0.26 | 1 | MS.Trt_vs_MS.NoTrt_F |
| LCOR      | 0.09199 | 0.46483 | 0.342 | 0.44 | 1 | MS.Trt_vs_MS.NoTrt_F |
| BRAT1     | 0.09202 | 0.74925 | 0.291 | 0.37 | 1 | MS.Trt_vs_MS.NoTrt_F |
| MTMR10    | 0.09218 | -1.2957 | 0.176 | 0.24 | 1 | MS.Trt_vs_MS.NoTrt_F |
| TSACC     | 0.09219 | -0.3366 | 0.129 | 0.19 | 1 | MS.Trt_vs_MS.NoTrt_F |
| ADIPOR1   | 0.0925  | 0.35904 | 0.266 | 0.35 | 1 | MS.Trt_vs_MS.NoTrt_F |
| GPR25     | 0.0926  | 1.13573 | 0.065 | 0.11 | 1 | MS.Trt_vs_MS.NoTrt_F |
| C3orf67   | 0.09293 | 0.93192 | 0.442 | 0.37 | 1 | MS.Trt_vs_MS.NoTrt_F |
| CDC14B    | 0.09302 | 0.55001 | 0.302 | 0.37 | 1 | MS.Trt_vs_MS.NoTrt_F |
| NEMP2     | 0.09316 | 0.77685 | 0.122 | 0.18 | 1 | MS.Trt_vs_MS.NoTrt_F |
| KLF9      | 0.09334 | 1.58858 | 0.068 | 0.12 | 1 | MS.Trt_vs_MS.NoTrt_F |
| SART3     | 0.09336 | 0.50469 | 0.176 | 0.25 | 1 | MS.Trt_vs_MS.NoTrt_F |
| RPL7L1    | 0.09337 | 0.26249 | 0.996 | 1    | 1 | MS.Trt_vs_MS.NoTrt_F |
| CCNC      | 0.09341 | 0.35625 | 0.561 | 0.69 | 1 | MS.Trt_vs_MS.NoTrt_F |



|            |         |         |       |      |   |                      |
|------------|---------|---------|-------|------|---|----------------------|
| MSC        | 0.09343 | 0.99808 | 0.061 | 0.11 | 1 | MS.Trt_vs_MS.NoTrt_F |
| PTP4A2     | 0.09345 | 0.25194 | 0.525 | 0.61 | 1 | MS.Trt_vs_MS.NoTrt_F |
| USP45      | 0.09374 | 0.69787 | 0.18  | 0.25 | 1 | MS.Trt_vs_MS.NoTrt_F |
| SLC35B1    | 0.09429 | -0.2855 | 0.662 | 0.72 | 1 | MS.Trt_vs_MS.NoTrt_F |
| PSEN2      | 0.09438 | -1.0967 | 0.162 | 0.23 | 1 | MS.Trt_vs_MS.NoTrt_F |
| ST20-MTHFS | 0.09448 | 0.51121 | 0.151 | 0.22 | 1 | MS.Trt_vs_MS.NoTrt_F |
| DCAF6      | 0.09472 | 0.27489 | 0.223 | 0.31 | 1 | MS.Trt_vs_MS.NoTrt_F |
| MED6       | 0.09485 | -0.3113 | 0.504 | 0.56 | 1 | MS.Trt_vs_MS.NoTrt_F |
| DEAF1      | 0.09492 | -0.4465 | 0.331 | 0.42 | 1 | MS.Trt_vs_MS.NoTrt_F |
| C1orf109   | 0.09495 | -0.5554 | 0.921 | 0.86 | 1 | MS.Trt_vs_MS.NoTrt_F |
| ANGEL2     | 0.09499 | -0.3764 | 0.662 | 0.71 | 1 | MS.Trt_vs_MS.NoTrt_F |
| PTGIS      | 0.09536 | 0.55423 | 0.752 | 0.75 | 1 | MS.Trt_vs_MS.NoTrt_F |
| DUSP23     | 0.0955  | 1.16947 | 0.122 | 0.19 | 1 | MS.Trt_vs_MS.NoTrt_F |
| ERBB3      | 0.09563 | 0.62155 | 0.723 | 0.82 | 1 | MS.Trt_vs_MS.NoTrt_F |
| ZMAT1      | 0.09577 | -0.4237 | 0.338 | 0.42 | 1 | MS.Trt_vs_MS.NoTrt_F |
| ABAT       | 0.09608 | -0.6452 | 0.608 | 0.67 | 1 | MS.Trt_vs_MS.NoTrt_F |
| TPGS1      | 0.09612 | 0.51722 | 0.388 | 0.29 | 1 | MS.Trt_vs_MS.NoTrt_F |
| CGRRF1     | 0.09614 | 1.23626 | 0.245 | 0.33 | 1 | MS.Trt_vs_MS.NoTrt_F |
| TRIM61     | 0.09627 | -0.3152 | 0.234 | 0.3  | 1 | MS.Trt_vs_MS.NoTrt_F |
| SPG11      | 0.09633 | -0.3172 | 0.82  | 0.83 | 1 | MS.Trt_vs_MS.NoTrt_F |
| P2RX3      | 0.09636 | -0.2894 | 0.302 | 0.38 | 1 | MS.Trt_vs_MS.NoTrt_F |
| ACADSB     | 0.09641 | 0.84173 | 0.612 | 0.72 | 1 | MS.Trt_vs_MS.NoTrt_F |
| NEURL1     | 0.09651 | -0.5876 | 0.23  | 0.29 | 1 | MS.Trt_vs_MS.NoTrt_F |
| TPH1       | 0.09653 | 0.62741 | 0.428 | 0.52 | 1 | MS.Trt_vs_MS.NoTrt_F |
| ADARB2     | 0.09666 | 0.56993 | 0.327 | 0.41 | 1 | MS.Trt_vs_MS.NoTrt_F |
| TTLL1      | 0.0968  | 0.53261 | 0.065 | 0.11 | 1 | MS.Trt_vs_MS.NoTrt_F |
| DLEC1      | 0.09688 | -0.9951 | 0.464 | 0.54 | 1 | MS.Trt_vs_MS.NoTrt_F |
| PPIP5K1    | 0.09694 | -0.4742 | 0.511 | 0.61 | 1 | MS.Trt_vs_MS.NoTrt_F |
| COG2       | 0.09697 | 1.30822 | 0.353 | 0.44 | 1 | MS.Trt_vs_MS.NoTrt_F |
| IFI27L1    | 0.09702 | 0.52401 | 0.076 | 0.12 | 1 | MS.Trt_vs_MS.NoTrt_F |
| RANBP6     | 0.09711 | 0.39119 | 0.101 | 0.16 | 1 | MS.Trt_vs_MS.NoTrt_F |
| SRD5A3     | 0.09718 | 1.03406 | 0.392 | 0.49 | 1 | MS.Trt_vs_MS.NoTrt_F |
| GPAT2      | 0.09718 | 0.51743 | 0.061 | 0.11 | 1 | MS.Trt_vs_MS.NoTrt_F |
| GTF2H2     | 0.09724 | -0.419  | 0.921 | 0.9  | 1 | MS.Trt_vs_MS.NoTrt_F |
| TIMM44     | 0.0973  | 0.72306 | 0.662 | 0.77 | 1 | MS.Trt_vs_MS.NoTrt_F |
| SPTY2D1    | 0.09751 | 0.51097 | 0.363 | 0.44 | 1 | MS.Trt_vs_MS.NoTrt_F |
| MYNN       | 0.0976  | 0.421   | 0.277 | 0.35 | 1 | MS.Trt_vs_MS.NoTrt_F |
| LST1       | 0.09766 | 0.43574 | 0.255 | 0.33 | 1 | MS.Trt_vs_MS.NoTrt_F |
| SMN1       | 0.09768 | 0.29145 | 0.363 | 0.48 | 1 | MS.Trt_vs_MS.NoTrt_F |
| FO538757.1 | 0.09787 | 0.3583  | 0.191 | 0.27 | 1 | MS.Trt_vs_MS.NoTrt_F |

|          |         |         |       |      |   |                      |
|----------|---------|---------|-------|------|---|----------------------|
| MRPL42   | 0.09802 | 0.29916 | 0.964 | 0.99 | 1 | MS.Trt_vs_MS.NoTrt_F |
| PIK3CB   | 0.09804 | -0.8052 | 0.428 | 0.49 | 1 | MS.Trt_vs_MS.NoTrt_F |
| ZSCAN25  | 0.09854 | 0.27338 | 0.46  | 0.52 | 1 | MS.Trt_vs_MS.NoTrt_F |
| CGNL1    | 0.09866 | -0.535  | 0.335 | 0.41 | 1 | MS.Trt_vs_MS.NoTrt_F |
| DHX58    | 0.09868 | 1.59576 | 0.061 | 0.11 | 1 | MS.Trt_vs_MS.NoTrt_F |
| TSEN34   | 0.09872 | -0.5768 | 0.205 | 0.26 | 1 | MS.Trt_vs_MS.NoTrt_F |
| SERHL2   | 0.09877 | 0.59028 | 0.338 | 0.42 | 1 | MS.Trt_vs_MS.NoTrt_F |
| GPR35    | 0.0988  | -1.8272 | 0.27  | 0.33 | 1 | MS.Trt_vs_MS.NoTrt_F |
| ADAMTS17 | 0.0988  | 1.16926 | 0.183 | 0.25 | 1 | MS.Trt_vs_MS.NoTrt_F |
| STK40    | 0.09888 | 1.03436 | 0.112 | 0.17 | 1 | MS.Trt_vs_MS.NoTrt_F |
| CHD3     | 0.09888 | 0.31447 | 0.281 | 0.38 | 1 | MS.Trt_vs_MS.NoTrt_F |
| RPL27    | 0.09917 | 0.27237 | 0.586 | 0.77 | 1 | MS.Trt_vs_MS.NoTrt_F |
| JAGN1    | 0.09937 | 0.42729 | 0.129 | 0.19 | 1 | MS.Trt_vs_MS.NoTrt_F |
| PCBP4    | 0.09939 | 0.35349 | 0.119 | 0.18 | 1 | MS.Trt_vs_MS.NoTrt_F |
| ZNF74    | 0.09946 | -0.7171 | 0.446 | 0.51 | 1 | MS.Trt_vs_MS.NoTrt_F |
| CBX1     | 0.09958 | 0.35541 | 0.27  | 0.35 | 1 | MS.Trt_vs_MS.NoTrt_F |
| MIER1    | 0.09982 | 0.33112 | 0.658 | 0.78 | 1 | MS.Trt_vs_MS.NoTrt_F |
| RASGRF2  | 0.09984 | 0.39923 | 0.165 | 0.23 | 1 | MS.Trt_vs_MS.NoTrt_F |
| SLC12A9  | 0.09985 | -0.5516 | 0.867 | 0.9  | 1 | MS.Trt_vs_MS.NoTrt_F |
| TMEM39B  | 0.09987 | -0.3979 | 0.155 | 0.21 | 1 | MS.Trt_vs_MS.NoTrt_F |
| SLC25A39 | 0.10001 | 0.36697 | 0.676 | 0.77 | 1 | MS.Trt_vs_MS.NoTrt_F |
| NEXN     | 0.10012 | 0.25715 | 0.435 | 0.51 | 1 | MS.Trt_vs_MS.NoTrt_F |
| B3GNT5   | 0.10077 | -0.885  | 0.5   | 0.62 | 1 | MS.Trt_vs_MS.NoTrt_F |
| SRPK3    | 0.10083 | -0.3249 | 0.259 | 0.34 | 1 | MS.Trt_vs_MS.NoTrt_F |
| KLRK1    | 0.10106 | 1.78393 | 0.655 | 0.64 | 1 | MS.Trt_vs_MS.NoTrt_F |
| ASPH     | 0.10111 | 0.60155 | 0.468 | 0.56 | 1 | MS.Trt_vs_MS.NoTrt_F |
| SPAG16   | 0.10118 | -0.7314 | 0.471 | 0.54 | 1 | MS.Trt_vs_MS.NoTrt_F |
| CAMK1D   | 0.1012  | -0.2986 | 0.745 | 0.84 | 1 | MS.Trt_vs_MS.NoTrt_F |
| KCNJ6    | 0.10146 | 0.28482 | 0.827 | 0.83 | 1 | MS.Trt_vs_MS.NoTrt_F |
| MAD2L1BP | 0.10167 | 0.2886  | 0.18  | 0.25 | 1 | MS.Trt_vs_MS.NoTrt_F |
| BMPR2    | 0.10174 | -0.3961 | 0.54  | 0.61 | 1 | MS.Trt_vs_MS.NoTrt_F |
| PRKCB    | 0.10179 | 0.51249 | 0.223 | 0.3  | 1 | MS.Trt_vs_MS.NoTrt_F |
| VWA2     | 0.1018  | -0.4062 | 0.73  | 0.79 | 1 | MS.Trt_vs_MS.NoTrt_F |
| THOC7    | 0.1019  | 0.5312  | 0.219 | 0.3  | 1 | MS.Trt_vs_MS.NoTrt_F |
| SLC25A19 | 0.10218 | -0.46   | 0.378 | 0.46 | 1 | MS.Trt_vs_MS.NoTrt_F |
| LAPTM4B  | 0.10222 | -0.7884 | 0.183 | 0.24 | 1 | MS.Trt_vs_MS.NoTrt_F |
| BORCS8   | 0.10232 | 0.32441 | 0.906 | 0.95 | 1 | MS.Trt_vs_MS.NoTrt_F |
| ENOX2    | 0.10242 | 1.09221 | 0.129 | 0.19 | 1 | MS.Trt_vs_MS.NoTrt_F |
| CTNND1   | 0.10256 | 0.29273 | 0.356 | 0.45 | 1 | MS.Trt_vs_MS.NoTrt_F |
| JAK3     | 0.10265 | 0.63856 | 0.809 | 0.83 | 1 | MS.Trt_vs_MS.NoTrt_F |

|            |         |         |       |      |   |                      |
|------------|---------|---------|-------|------|---|----------------------|
| MAP1LC3A   | 0.10292 | 0.51252 | 0.083 | 0.13 | 1 | MS.Trt_vs_MS.NoTrt_F |
| AXL        | 0.10305 | -0.8847 | 0.716 | 0.79 | 1 | MS.Trt_vs_MS.NoTrt_F |
| CD3EAP     | 0.10336 | 0.42453 | 0.881 | 0.77 | 1 | MS.Trt_vs_MS.NoTrt_F |
| PTPN4      | 0.10345 | 0.32865 | 0.619 | 0.71 | 1 | MS.Trt_vs_MS.NoTrt_F |
| ZNF276     | 0.1035  | 0.27777 | 0.529 | 0.6  | 1 | MS.Trt_vs_MS.NoTrt_F |
| ZGRF1      | 0.1036  | 0.66506 | 0.705 | 0.83 | 1 | MS.Trt_vs_MS.NoTrt_F |
| CTDP1      | 0.10366 | 1.61401 | 0.086 | 0.14 | 1 | MS.Trt_vs_MS.NoTrt_F |
| KAT14      | 0.10376 | 0.49982 | 0.108 | 0.17 | 1 | MS.Trt_vs_MS.NoTrt_F |
| LANCL2     | 0.10414 | 0.38571 | 0.137 | 0.2  | 1 | MS.Trt_vs_MS.NoTrt_F |
| PROSER1    | 0.1042  | 0.44701 | 0.194 | 0.27 | 1 | MS.Trt_vs_MS.NoTrt_F |
| CHMP5      | 0.10434 | 0.59175 | 0.14  | 0.2  | 1 | MS.Trt_vs_MS.NoTrt_F |
| HOXB7      | 0.10447 | -0.3212 | 0.23  | 0.32 | 1 | MS.Trt_vs_MS.NoTrt_F |
| CSF1       | 0.10476 | 0.51397 | 0.129 | 0.19 | 1 | MS.Trt_vs_MS.NoTrt_F |
| ZNF700     | 0.10515 | 0.48507 | 0.191 | 0.26 | 1 | MS.Trt_vs_MS.NoTrt_F |
| WSB2       | 0.10518 | 0.61284 | 0.831 | 0.85 | 1 | MS.Trt_vs_MS.NoTrt_F |
| SEMA4F     | 0.10546 | -0.5602 | 0.518 | 0.59 | 1 | MS.Trt_vs_MS.NoTrt_F |
| PLA2G15    | 0.10575 | -0.693  | 0.745 | 0.82 | 1 | MS.Trt_vs_MS.NoTrt_F |
| UNC45B     | 0.10576 | -0.5145 | 0.151 | 0.21 | 1 | MS.Trt_vs_MS.NoTrt_F |
| WASL       | 0.1058  | 0.57582 | 0.119 | 0.18 | 1 | MS.Trt_vs_MS.NoTrt_F |
| RP11-1035H | 0.10586 | 1.23619 | 0.126 | 0.19 | 1 | MS.Trt_vs_MS.NoTrt_F |
| C21orf33   | 0.10592 | 0.56207 | 0.374 | 0.46 | 1 | MS.Trt_vs_MS.NoTrt_F |
| GOLGA2     | 0.10595 | 0.28244 | 0.558 | 0.69 | 1 | MS.Trt_vs_MS.NoTrt_F |
| ATP5J      | 0.10624 | 0.87141 | 0.237 | 0.34 | 1 | MS.Trt_vs_MS.NoTrt_F |
| ACSL3      | 0.1063  | -0.319  | 0.115 | 0.17 | 1 | MS.Trt_vs_MS.NoTrt_F |
| BSDC1      | 0.1063  | 0.30815 | 0.45  | 0.55 | 1 | MS.Trt_vs_MS.NoTrt_F |
| EME2       | 0.10644 | -0.4582 | 0.281 | 0.37 | 1 | MS.Trt_vs_MS.NoTrt_F |
| ZNF121     | 0.1065  | 0.43426 | 0.899 | 0.94 | 1 | MS.Trt_vs_MS.NoTrt_F |
| GMNN       | 0.10657 | 0.25442 | 0.072 | 0.12 | 1 | MS.Trt_vs_MS.NoTrt_F |
| GMEB1      | 0.10663 | -0.9183 | 0.791 | 0.83 | 1 | MS.Trt_vs_MS.NoTrt_F |
| TPRG1      | 0.10725 | 0.75006 | 0.219 | 0.3  | 1 | MS.Trt_vs_MS.NoTrt_F |
| CYHR1      | 0.10737 | 0.43299 | 0.27  | 0.35 | 1 | MS.Trt_vs_MS.NoTrt_F |
| XRCC2      | 0.10743 | -0.4089 | 0.734 | 0.81 | 1 | MS.Trt_vs_MS.NoTrt_F |
| ERCC6L     | 0.10745 | 1.39401 | 0.144 | 0.21 | 1 | MS.Trt_vs_MS.NoTrt_F |
| SH2D1A     | 0.10752 | 0.71886 | 0.241 | 0.34 | 1 | MS.Trt_vs_MS.NoTrt_F |
| MED29      | 0.10765 | 0.41304 | 0.586 | 0.67 | 1 | MS.Trt_vs_MS.NoTrt_F |
| CHN1       | 0.10772 | 0.85021 | 0.079 | 0.13 | 1 | MS.Trt_vs_MS.NoTrt_F |
| GGA3       | 0.10782 | 0.25972 | 0.212 | 0.29 | 1 | MS.Trt_vs_MS.NoTrt_F |
| ZNF540     | 0.10814 | 0.97142 | 0.493 | 0.57 | 1 | MS.Trt_vs_MS.NoTrt_F |
| GTF2H2C.2  | 0.10819 | 0.67957 | 0.255 | 0.34 | 1 | MS.Trt_vs_MS.NoTrt_F |
| ATP5L      | 0.10822 | 0.59536 | 0.421 | 0.58 | 1 | MS.Trt_vs_MS.NoTrt_F |

|            |         |         |       |      |                        |
|------------|---------|---------|-------|------|------------------------|
| GARNL3     | 0.10823 | 0.78566 | 0.187 | 0.25 | 1 MS.Trt_vs_MS.NoTrt_F |
| PAK1IP1    | 0.10849 | 0.85515 | 0.083 | 0.13 | 1 MS.Trt_vs_MS.NoTrt_F |
| TUBD1      | 0.1086  | -0.7891 | 0.755 | 0.82 | 1 MS.Trt_vs_MS.NoTrt_F |
| PDS5B      | 0.10867 | 0.55168 | 0.363 | 0.44 | 1 MS.Trt_vs_MS.NoTrt_F |
| SOS1       | 0.10875 | 0.39283 | 0.191 | 0.26 | 1 MS.Trt_vs_MS.NoTrt_F |
| THOC2      | 0.10882 | 0.26423 | 0.532 | 0.61 | 1 MS.Trt_vs_MS.NoTrt_F |
| CHRM5      | 0.109   | 0.31596 | 0.281 | 0.36 | 1 MS.Trt_vs_MS.NoTrt_F |
| SORBS3     | 0.109   | 1.06742 | 0.083 | 0.13 | 1 MS.Trt_vs_MS.NoTrt_F |
| POLRMT     | 0.10914 | 1.16754 | 0.119 | 0.18 | 1 MS.Trt_vs_MS.NoTrt_F |
| RP11-286N2 | 0.10915 | 0.32903 | 0.957 | 0.97 | 1 MS.Trt_vs_MS.NoTrt_F |
| AIFM1      | 0.10918 | -0.5473 | 0.572 | 0.63 | 1 MS.Trt_vs_MS.NoTrt_F |
| DHX29      | 0.10928 | 0.25486 | 0.18  | 0.25 | 1 MS.Trt_vs_MS.NoTrt_F |
| TANC2      | 0.10928 | 1.06991 | 0.223 | 0.3  | 1 MS.Trt_vs_MS.NoTrt_F |
| SETMAR     | 0.1093  | 0.60287 | 0.331 | 0.45 | 1 MS.Trt_vs_MS.NoTrt_F |
| GRK5       | 0.10962 | 0.68731 | 0.187 | 0.26 | 1 MS.Trt_vs_MS.NoTrt_F |
| FOXK1      | 0.10968 | 0.32385 | 0.853 | 0.9  | 1 MS.Trt_vs_MS.NoTrt_F |
| ZNF267     | 0.1097  | 0.38239 | 0.201 | 0.28 | 1 MS.Trt_vs_MS.NoTrt_F |
| PLXNC1     | 0.10972 | -0.6324 | 0.101 | 0.16 | 1 MS.Trt_vs_MS.NoTrt_F |
| EFCAB5     | 0.10976 | -0.6248 | 0.442 | 0.53 | 1 MS.Trt_vs_MS.NoTrt_F |
| GPR132     | 0.11033 | -0.3853 | 0.378 | 0.46 | 1 MS.Trt_vs_MS.NoTrt_F |
| GLA        | 0.11052 | 0.92998 | 0.079 | 0.13 | 1 MS.Trt_vs_MS.NoTrt_F |
| MSL3       | 0.11071 | 1.10168 | 0.18  | 0.26 | 1 MS.Trt_vs_MS.NoTrt_F |
| FASTKD2    | 0.1109  | 0.68893 | 0.529 | 0.62 | 1 MS.Trt_vs_MS.NoTrt_F |
| NAA15      | 0.11099 | 0.43399 | 0.788 | 0.79 | 1 MS.Trt_vs_MS.NoTrt_F |
| MELTF      | 0.11101 | 0.28562 | 0.112 | 0.17 | 1 MS.Trt_vs_MS.NoTrt_F |
| TAF13      | 0.11126 | 0.39    | 0.165 | 0.23 | 1 MS.Trt_vs_MS.NoTrt_F |
| CEP78      | 0.11148 | -0.5573 | 0.522 | 0.6  | 1 MS.Trt_vs_MS.NoTrt_F |
| KIAA0408   | 0.11156 | -0.4917 | 0.291 | 0.36 | 1 MS.Trt_vs_MS.NoTrt_F |
| MCF2L2     | 0.11189 | -0.5348 | 0.935 | 0.95 | 1 MS.Trt_vs_MS.NoTrt_F |
| LYG2       | 0.11189 | 1.01873 | 0.083 | 0.13 | 1 MS.Trt_vs_MS.NoTrt_F |
| RLF        | 0.11192 | 0.4242  | 0.23  | 0.32 | 1 MS.Trt_vs_MS.NoTrt_F |
| ZNF512     | 0.11207 | 0.54535 | 0.151 | 0.22 | 1 MS.Trt_vs_MS.NoTrt_F |
| UBR1       | 0.11207 | 0.33409 | 0.691 | 0.72 | 1 MS.Trt_vs_MS.NoTrt_F |
| NTPCR      | 0.11224 | 0.56361 | 0.417 | 0.5  | 1 MS.Trt_vs_MS.NoTrt_F |
| DHX32      | 0.11229 | 0.41675 | 0.068 | 0.11 | 1 MS.Trt_vs_MS.NoTrt_F |
| UBE2E3     | 0.11236 | 1.19827 | 0.079 | 0.13 | 1 MS.Trt_vs_MS.NoTrt_F |
| RNF41      | 0.11261 | -0.2526 | 0.719 | 0.82 | 1 MS.Trt_vs_MS.NoTrt_F |
| AHCYL1     | 0.11265 | -0.3441 | 0.097 | 0.15 | 1 MS.Trt_vs_MS.NoTrt_F |
| ILF3       | 0.11266 | 0.2502  | 0.723 | 0.83 | 1 MS.Trt_vs_MS.NoTrt_F |
| PLPP6      | 0.1128  | 0.68361 | 0.094 | 0.14 | 1 MS.Trt_vs_MS.NoTrt_F |

|             |         |         |       |      |                        |
|-------------|---------|---------|-------|------|------------------------|
| TNFSF8      | 0.11292 | 0.80483 | 0.151 | 0.22 | 1 MS.Trt_vs_MS.NoTrt_F |
| MCTP2       | 0.11316 | 0.91147 | 0.378 | 0.46 | 1 MS.Trt_vs_MS.NoTrt_F |
| AP2A1       | 0.1133  | -0.4306 | 0.716 | 0.82 | 1 MS.Trt_vs_MS.NoTrt_F |
| NOL4L       | 0.11333 | 0.26699 | 0.511 | 0.69 | 1 MS.Trt_vs_MS.NoTrt_F |
| ALAS1       | 0.11348 | -0.404  | 0.108 | 0.16 | 1 MS.Trt_vs_MS.NoTrt_F |
| COPB2       | 0.11366 | -0.3599 | 0.896 | 0.96 | 1 MS.Trt_vs_MS.NoTrt_F |
| BTBD11      | 0.11391 | 0.7327  | 0.442 | 0.59 | 1 MS.Trt_vs_MS.NoTrt_F |
| ZCCHC8      | 0.11403 | 0.3768  | 0.853 | 0.88 | 1 MS.Trt_vs_MS.NoTrt_F |
| ALG6        | 0.11418 | 0.38316 | 0.183 | 0.26 | 1 MS.Trt_vs_MS.NoTrt_F |
| CLEC2D      | 0.11445 | 0.59717 | 0.827 | 0.88 | 1 MS.Trt_vs_MS.NoTrt_F |
| MCCC1       | 0.11456 | -0.3233 | 0.493 | 0.58 | 1 MS.Trt_vs_MS.NoTrt_F |
| SLC38A6     | 0.11472 | 0.68779 | 0.561 | 0.67 | 1 MS.Trt_vs_MS.NoTrt_F |
| CENPA       | 0.11493 | -0.2601 | 0.086 | 0.13 | 1 MS.Trt_vs_MS.NoTrt_F |
| WDR3        | 0.11505 | -1.1051 | 0.741 | 0.79 | 1 MS.Trt_vs_MS.NoTrt_F |
| EI24        | 0.11528 | 0.42876 | 0.716 | 0.84 | 1 MS.Trt_vs_MS.NoTrt_F |
| RNF26       | 0.11546 | 1.59454 | 0.129 | 0.19 | 1 MS.Trt_vs_MS.NoTrt_F |
| POLR2E      | 0.11566 | 0.27771 | 0.583 | 0.66 | 1 MS.Trt_vs_MS.NoTrt_F |
| SCAF1       | 0.11568 | 0.2652  | 0.09  | 0.14 | 1 MS.Trt_vs_MS.NoTrt_F |
| MUM1        | 0.11576 | 0.25227 | 0.633 | 0.69 | 1 MS.Trt_vs_MS.NoTrt_F |
| TRIM39      | 0.11586 | 0.3571  | 0.165 | 0.23 | 1 MS.Trt_vs_MS.NoTrt_F |
| SRBD1       | 0.11604 | 1.10976 | 0.356 | 0.45 | 1 MS.Trt_vs_MS.NoTrt_F |
| FAM86B1     | 0.11608 | -0.934  | 0.115 | 0.17 | 1 MS.Trt_vs_MS.NoTrt_F |
| PFDN4       | 0.11629 | 1.13048 | 0.119 | 0.18 | 1 MS.Trt_vs_MS.NoTrt_F |
| SC5D        | 0.1163  | 0.26257 | 0.583 | 0.63 | 1 MS.Trt_vs_MS.NoTrt_F |
| ARRB1       | 0.11662 | 0.54338 | 0.737 | 0.81 | 1 MS.Trt_vs_MS.NoTrt_F |
| CDK18       | 0.11684 | -0.2872 | 0.205 | 0.27 | 1 MS.Trt_vs_MS.NoTrt_F |
| MCRIP1      | 0.11686 | 0.39887 | 0.41  | 0.48 | 1 MS.Trt_vs_MS.NoTrt_F |
| TANGO6      | 0.11692 | -0.4566 | 0.763 | 0.83 | 1 MS.Trt_vs_MS.NoTrt_F |
| THUMPD2     | 0.1171  | 1.01253 | 0.417 | 0.5  | 1 MS.Trt_vs_MS.NoTrt_F |
| SKIL        | 0.11718 | 0.28106 | 0.374 | 0.47 | 1 MS.Trt_vs_MS.NoTrt_F |
| ALG5        | 0.11722 | 0.47662 | 0.478 | 0.38 | 1 MS.Trt_vs_MS.NoTrt_F |
| SNAP29      | 0.11722 | -0.371  | 0.683 | 0.77 | 1 MS.Trt_vs_MS.NoTrt_F |
| SLC52A2     | 0.11734 | -0.2557 | 0.068 | 0.11 | 1 MS.Trt_vs_MS.NoTrt_F |
| REL         | 0.11767 | 0.33188 | 0.96  | 0.97 | 1 MS.Trt_vs_MS.NoTrt_F |
| ANKHD1-EIF  | 0.11769 | 1.56874 | 0.079 | 0.13 | 1 MS.Trt_vs_MS.NoTrt_F |
| C15orf38-AF | 0.11777 | -0.3306 | 0.374 | 0.43 | 1 MS.Trt_vs_MS.NoTrt_F |
| LILRB3      | 0.11778 | -0.7427 | 0.144 | 0.2  | 1 MS.Trt_vs_MS.NoTrt_F |
| BAG5        | 0.11817 | -0.8469 | 0.331 | 0.4  | 1 MS.Trt_vs_MS.NoTrt_F |
| SLC7A5      | 0.11836 | 0.4701  | 0.133 | 0.19 | 1 MS.Trt_vs_MS.NoTrt_F |
| KLRG1       | 0.11839 | 0.80687 | 0.371 | 0.48 | 1 MS.Trt_vs_MS.NoTrt_F |

|            |         |         |       |      |   |                      |
|------------|---------|---------|-------|------|---|----------------------|
| B3GNTL1    | 0.11846 | 0.41757 | 0.288 | 0.35 | 1 | MS.Trt_vs_MS.NoTrt_F |
| MS4A2      | 0.11861 | 0.3569  | 0.568 | 0.59 | 1 | MS.Trt_vs_MS.NoTrt_F |
| SNX24      | 0.11871 | 0.63446 | 0.068 | 0.11 | 1 | MS.Trt_vs_MS.NoTrt_F |
| TBC1D32    | 0.11872 | 0.70143 | 0.46  | 0.53 | 1 | MS.Trt_vs_MS.NoTrt_F |
| RPS15      | 0.11894 | 0.29655 | 0.881 | 0.99 | 1 | MS.Trt_vs_MS.NoTrt_F |
| DTX3L      | 0.11901 | 0.80694 | 0.658 | 0.79 | 1 | MS.Trt_vs_MS.NoTrt_F |
| YIF1B      | 0.11916 | 0.36896 | 0.608 | 0.72 | 1 | MS.Trt_vs_MS.NoTrt_F |
| GCNT4      | 0.11936 | 0.46273 | 0.439 | 0.57 | 1 | MS.Trt_vs_MS.NoTrt_F |
| ABHD18     | 0.11974 | 0.33279 | 0.867 | 0.85 | 1 | MS.Trt_vs_MS.NoTrt_F |
| CCDC102B   | 0.11977 | 0.2626  | 0.191 | 0.25 | 1 | MS.Trt_vs_MS.NoTrt_F |
| NSMF       | 0.11998 | 1.94461 | 0.09  | 0.14 | 1 | MS.Trt_vs_MS.NoTrt_F |
| CHD1L      | 0.12028 | 0.91063 | 0.14  | 0.2  | 1 | MS.Trt_vs_MS.NoTrt_F |
| HGS        | 0.12035 | 0.40788 | 0.626 | 0.7  | 1 | MS.Trt_vs_MS.NoTrt_F |
| SERPINF1   | 0.12051 | 0.31849 | 0.791 | 0.88 | 1 | MS.Trt_vs_MS.NoTrt_F |
| ABCD4      | 0.12058 | 0.70877 | 0.799 | 0.83 | 1 | MS.Trt_vs_MS.NoTrt_F |
| RP11-15H20 | 0.12061 | -0.4463 | 0.151 | 0.21 | 1 | MS.Trt_vs_MS.NoTrt_F |
| GOLGA6L9   | 0.12082 | 0.65689 | 0.068 | 0.11 | 1 | MS.Trt_vs_MS.NoTrt_F |
| NKIRAS2    | 0.12086 | 0.92444 | 0.835 | 0.86 | 1 | MS.Trt_vs_MS.NoTrt_F |
| HLA-DOA    | 0.121   | -0.9882 | 0.604 | 0.67 | 1 | MS.Trt_vs_MS.NoTrt_F |
| POU2F1     | 0.12137 | 0.2936  | 0.399 | 0.48 | 1 | MS.Trt_vs_MS.NoTrt_F |
| LY75-CD302 | 0.12149 | 1.76879 | 0.097 | 0.15 | 1 | MS.Trt_vs_MS.NoTrt_F |
| DCAF17     | 0.12166 | -0.5611 | 0.381 | 0.45 | 1 | MS.Trt_vs_MS.NoTrt_F |
| ATP5SL     | 0.12169 | -0.3109 | 0.504 | 0.59 | 1 | MS.Trt_vs_MS.NoTrt_F |
| RAI14      | 0.12181 | 0.38465 | 0.101 | 0.15 | 1 | MS.Trt_vs_MS.NoTrt_F |
| RPS25      | 0.12222 | 0.25441 | 0.694 | 0.91 | 1 | MS.Trt_vs_MS.NoTrt_F |
| HIST1H4I   | 0.12226 | -0.8774 | 0.068 | 0.11 | 1 | MS.Trt_vs_MS.NoTrt_F |
| WDR75      | 0.12239 | -0.2946 | 0.353 | 0.43 | 1 | MS.Trt_vs_MS.NoTrt_F |
| PTCD1      | 0.12278 | -0.5225 | 0.633 | 0.69 | 1 | MS.Trt_vs_MS.NoTrt_F |
| DNAJB7     | 0.12281 | 0.31441 | 0.227 | 0.31 | 1 | MS.Trt_vs_MS.NoTrt_F |
| STK16      | 0.12295 | 0.29319 | 0.115 | 0.17 | 1 | MS.Trt_vs_MS.NoTrt_F |
| BCS1L      | 0.12295 | 0.7529  | 0.108 | 0.16 | 1 | MS.Trt_vs_MS.NoTrt_F |
| NOM1       | 0.12303 | -0.9726 | 0.619 | 0.69 | 1 | MS.Trt_vs_MS.NoTrt_F |
| TTC22      | 0.12305 | -1.1038 | 0.432 | 0.52 | 1 | MS.Trt_vs_MS.NoTrt_F |
| MAP2K2     | 0.1232  | 0.88811 | 0.705 | 0.78 | 1 | MS.Trt_vs_MS.NoTrt_F |
| ATP5H      | 0.12322 | 0.55376 | 0.748 | 0.81 | 1 | MS.Trt_vs_MS.NoTrt_F |
| CNOT9      | 0.12339 | 0.34911 | 0.752 | 0.84 | 1 | MS.Trt_vs_MS.NoTrt_F |
| GIN1       | 0.12345 | 0.49762 | 0.367 | 0.46 | 1 | MS.Trt_vs_MS.NoTrt_F |
| SLC35A5    | 0.12356 | 0.4565  | 0.489 | 0.56 | 1 | MS.Trt_vs_MS.NoTrt_F |
| TMEM177    | 0.12356 | 0.2958  | 0.072 | 0.12 | 1 | MS.Trt_vs_MS.NoTrt_F |
| TCEA3      | 0.12357 | 1.43443 | 0.076 | 0.12 | 1 | MS.Trt_vs_MS.NoTrt_F |

|          |         |         |       |      |   |                      |
|----------|---------|---------|-------|------|---|----------------------|
| TXNL4B   | 0.1236  | 0.33732 | 0.353 | 0.43 | 1 | MS.Trt_vs_MS.NoTrt_F |
| SMTN     | 0.12377 | 0.76227 | 0.399 | 0.32 | 1 | MS.Trt_vs_MS.NoTrt_F |
| KLB      | 0.12379 | 0.26511 | 0.777 | 0.76 | 1 | MS.Trt_vs_MS.NoTrt_F |
| SEC13    | 0.12395 | 0.41802 | 0.187 | 0.26 | 1 | MS.Trt_vs_MS.NoTrt_F |
| NT5DC3   | 0.12404 | 0.57976 | 0.827 | 0.83 | 1 | MS.Trt_vs_MS.NoTrt_F |
| NDUFB9   | 0.12448 | 0.37122 | 0.237 | 0.32 | 1 | MS.Trt_vs_MS.NoTrt_F |
| PASK     | 0.12481 | -0.265  | 0.586 | 0.65 | 1 | MS.Trt_vs_MS.NoTrt_F |
| TTC7A    | 0.12488 | 0.4138  | 0.223 | 0.3  | 1 | MS.Trt_vs_MS.NoTrt_F |
| COQ2     | 0.12497 | -0.5475 | 0.065 | 0.11 | 1 | MS.Trt_vs_MS.NoTrt_F |
| DNAJA4   | 0.12506 | 0.4198  | 0.176 | 0.24 | 1 | MS.Trt_vs_MS.NoTrt_F |
| ANAPC16  | 0.12507 | 0.29811 | 0.946 | 0.97 | 1 | MS.Trt_vs_MS.NoTrt_F |
| HERPUD1  | 0.12515 | 0.28352 | 0.745 | 0.78 | 1 | MS.Trt_vs_MS.NoTrt_F |
| BRIP1    | 0.12517 | -0.4998 | 0.809 | 0.87 | 1 | MS.Trt_vs_MS.NoTrt_F |
| SLC2A11  | 0.12527 | -0.2592 | 0.863 | 0.83 | 1 | MS.Trt_vs_MS.NoTrt_F |
| SMURF1   | 0.12528 | 0.3072  | 0.191 | 0.27 | 1 | MS.Trt_vs_MS.NoTrt_F |
| MT1X     | 0.12529 | 0.33177 | 0.155 | 0.22 | 1 | MS.Trt_vs_MS.NoTrt_F |
| NDUFB7   | 0.12531 | 0.84694 | 0.245 | 0.35 | 1 | MS.Trt_vs_MS.NoTrt_F |
| CDV3     | 0.12535 | 0.71572 | 0.263 | 0.36 | 1 | MS.Trt_vs_MS.NoTrt_F |
| ENTPD7   | 0.12549 | -0.4935 | 0.353 | 0.44 | 1 | MS.Trt_vs_MS.NoTrt_F |
| ZNF28    | 0.12549 | 0.82214 | 0.777 | 0.87 | 1 | MS.Trt_vs_MS.NoTrt_F |
| CDCA7L   | 0.12573 | 0.53724 | 0.108 | 0.16 | 1 | MS.Trt_vs_MS.NoTrt_F |
| KLHL21   | 0.12575 | -0.3032 | 0.727 | 0.81 | 1 | MS.Trt_vs_MS.NoTrt_F |
| NR1D2    | 0.12604 | 0.50639 | 0.173 | 0.24 | 1 | MS.Trt_vs_MS.NoTrt_F |
| NR2C2AP  | 0.12639 | 0.54625 | 0.122 | 0.18 | 1 | MS.Trt_vs_MS.NoTrt_F |
| UQCC3    | 0.12642 | 0.8418  | 0.428 | 0.5  | 1 | MS.Trt_vs_MS.NoTrt_F |
| HCCS     | 0.12649 | 1.34812 | 0.097 | 0.15 | 1 | MS.Trt_vs_MS.NoTrt_F |
| TIPRL    | 0.12652 | 0.3235  | 0.302 | 0.37 | 1 | MS.Trt_vs_MS.NoTrt_F |
| GOLGA7B  | 0.12653 | 0.82253 | 0.086 | 0.13 | 1 | MS.Trt_vs_MS.NoTrt_F |
| CROCC    | 0.12654 | 0.29535 | 0.554 | 0.48 | 1 | MS.Trt_vs_MS.NoTrt_F |
| CAMK2N1  | 0.12672 | -0.5323 | 0.108 | 0.16 | 1 | MS.Trt_vs_MS.NoTrt_F |
| TMEM126B | 0.12693 | 0.80322 | 0.205 | 0.27 | 1 | MS.Trt_vs_MS.NoTrt_F |
| RAB21    | 0.12694 | 0.27976 | 0.968 | 0.98 | 1 | MS.Trt_vs_MS.NoTrt_F |
| ZKSCAN1  | 0.12702 | 0.4047  | 0.96  | 0.96 | 1 | MS.Trt_vs_MS.NoTrt_F |
| RPS6KA2  | 0.12712 | 0.88752 | 0.104 | 0.16 | 1 | MS.Trt_vs_MS.NoTrt_F |
| ZACN     | 0.12719 | 0.70674 | 0.086 | 0.13 | 1 | MS.Trt_vs_MS.NoTrt_F |
| DUSP7    | 0.12734 | 0.58847 | 0.147 | 0.21 | 1 | MS.Trt_vs_MS.NoTrt_F |
| IL27RA   | 0.12772 | 0.61846 | 0.385 | 0.49 | 1 | MS.Trt_vs_MS.NoTrt_F |
| TBC1D9B  | 0.12782 | 0.65684 | 0.446 | 0.55 | 1 | MS.Trt_vs_MS.NoTrt_F |
| MT-ND5   | 0.12798 | 0.47546 | 0.813 | 0.88 | 1 | MS.Trt_vs_MS.NoTrt_F |
| NFAT5    | 0.12798 | -0.5367 | 0.838 | 0.89 | 1 | MS.Trt_vs_MS.NoTrt_F |

|          |         |         |       |      |   |                      |
|----------|---------|---------|-------|------|---|----------------------|
| ACTL6A   | 0.12838 | 0.35332 | 0.259 | 0.34 | 1 | MS.Trt_vs_MS.NoTrt_F |
| LAP3     | 0.12853 | 0.71574 | 0.18  | 0.25 | 1 | MS.Trt_vs_MS.NoTrt_F |
| DPH6     | 0.12853 | 0.47233 | 0.363 | 0.45 | 1 | MS.Trt_vs_MS.NoTrt_F |
| RAP1GDS1 | 0.12857 | 0.60704 | 0.363 | 0.5  | 1 | MS.Trt_vs_MS.NoTrt_F |
| BCL2L14  | 0.12868 | 0.29407 | 0.716 | 0.7  | 1 | MS.Trt_vs_MS.NoTrt_F |
| PRG4     | 0.12871 | -0.3045 | 0.065 | 0.11 | 1 | MS.Trt_vs_MS.NoTrt_F |
| MKL2     | 0.12875 | -0.8305 | 0.705 | 0.8  | 1 | MS.Trt_vs_MS.NoTrt_F |
| SPTBN1   | 0.12907 | 0.36837 | 0.288 | 0.38 | 1 | MS.Trt_vs_MS.NoTrt_F |
| TESPA1   | 0.1291  | 0.56381 | 0.41  | 0.52 | 1 | MS.Trt_vs_MS.NoTrt_F |
| FREM2    | 0.12919 | 0.26664 | 0.673 | 0.62 | 1 | MS.Trt_vs_MS.NoTrt_F |
| DTD1     | 0.12946 | -0.7673 | 0.349 | 0.4  | 1 | MS.Trt_vs_MS.NoTrt_F |
| TMED3    | 0.12947 | 0.35269 | 0.558 | 0.65 | 1 | MS.Trt_vs_MS.NoTrt_F |
| PAQR8    | 0.12953 | 0.75721 | 0.514 | 0.61 | 1 | MS.Trt_vs_MS.NoTrt_F |
| KSR2     | 0.12954 | -0.5572 | 0.237 | 0.3  | 1 | MS.Trt_vs_MS.NoTrt_F |
| COA1     | 0.13013 | 0.49541 | 0.748 | 0.87 | 1 | MS.Trt_vs_MS.NoTrt_F |
| TGFBR1   | 0.1302  | 1.52705 | 0.122 | 0.18 | 1 | MS.Trt_vs_MS.NoTrt_F |
| FAM20A   | 0.13025 | -0.7874 | 0.18  | 0.24 | 1 | MS.Trt_vs_MS.NoTrt_F |
| SHC1     | 0.13039 | 0.34239 | 0.601 | 0.67 | 1 | MS.Trt_vs_MS.NoTrt_F |
| CUL3     | 0.13078 | 0.28585 | 0.309 | 0.4  | 1 | MS.Trt_vs_MS.NoTrt_F |
| MAEA     | 0.13111 | -0.2943 | 0.633 | 0.71 | 1 | MS.Trt_vs_MS.NoTrt_F |
| WBP4     | 0.13135 | 0.88056 | 0.112 | 0.17 | 1 | MS.Trt_vs_MS.NoTrt_F |
| FAM193B  | 0.13198 | 0.45668 | 0.471 | 0.56 | 1 | MS.Trt_vs_MS.NoTrt_F |
| SURF4    | 0.13212 | 0.54582 | 0.317 | 0.44 | 1 | MS.Trt_vs_MS.NoTrt_F |
| APBA1    | 0.13214 | -1.1791 | 0.385 | 0.45 | 1 | MS.Trt_vs_MS.NoTrt_F |
| NEK6     | 0.13232 | 0.96095 | 0.119 | 0.18 | 1 | MS.Trt_vs_MS.NoTrt_F |
| PYGO1    | 0.13238 | 0.33801 | 0.381 | 0.34 | 1 | MS.Trt_vs_MS.NoTrt_F |
| GANC     | 0.13249 | 0.83716 | 0.647 | 0.7  | 1 | MS.Trt_vs_MS.NoTrt_F |
| EXD3     | 0.13259 | 0.26464 | 0.478 | 0.56 | 1 | MS.Trt_vs_MS.NoTrt_F |
| MYBL1    | 0.13263 | 0.5731  | 0.065 | 0.11 | 1 | MS.Trt_vs_MS.NoTrt_F |
| FANCG    | 0.13268 | 0.59398 | 0.104 | 0.16 | 1 | MS.Trt_vs_MS.NoTrt_F |
| SDF2L1   | 0.13319 | 0.56493 | 0.173 | 0.24 | 1 | MS.Trt_vs_MS.NoTrt_F |
| RNF180   | 0.13323 | 0.66879 | 0.306 | 0.4  | 1 | MS.Trt_vs_MS.NoTrt_F |
| NSMCE4A  | 0.13357 | 0.47917 | 0.349 | 0.42 | 1 | MS.Trt_vs_MS.NoTrt_F |
| ST13     | 0.13376 | 0.51747 | 0.345 | 0.44 | 1 | MS.Trt_vs_MS.NoTrt_F |
| DPAGT1   | 0.13408 | -0.5963 | 0.112 | 0.16 | 1 | MS.Trt_vs_MS.NoTrt_F |
| SGSM2    | 0.13422 | 0.26637 | 0.263 | 0.33 | 1 | MS.Trt_vs_MS.NoTrt_F |
| PPAT     | 0.13433 | 1.64413 | 0.281 | 0.34 | 1 | MS.Trt_vs_MS.NoTrt_F |
| TFDP2    | 0.13435 | 0.6306  | 0.932 | 0.94 | 1 | MS.Trt_vs_MS.NoTrt_F |
| NEDD8    | 0.13447 | 0.40985 | 0.788 | 0.88 | 1 | MS.Trt_vs_MS.NoTrt_F |
| DNAJC16  | 0.13456 | 0.44881 | 0.723 | 0.82 | 1 | MS.Trt_vs_MS.NoTrt_F |



|             |         |         |       |      |                        |
|-------------|---------|---------|-------|------|------------------------|
| PHKB        | 0.1347  | -0.4648 | 0.694 | 0.77 | 1 MS.Trt_vs_MS.NoTrt_F |
| FRS2        | 0.13495 | -0.36   | 0.129 | 0.18 | 1 MS.Trt_vs_MS.NoTrt_F |
| EPN2        | 0.13505 | 0.47975 | 0.835 | 0.9  | 1 MS.Trt_vs_MS.NoTrt_F |
| MSI2        | 0.13506 | -0.5548 | 0.863 | 0.91 | 1 MS.Trt_vs_MS.NoTrt_F |
| VPS29       | 0.13519 | 0.57559 | 0.482 | 0.56 | 1 MS.Trt_vs_MS.NoTrt_F |
| GID4        | 0.13521 | -0.422  | 0.673 | 0.67 | 1 MS.Trt_vs_MS.NoTrt_F |
| TSSC4       | 0.13525 | 0.26061 | 0.191 | 0.26 | 1 MS.Trt_vs_MS.NoTrt_F |
| LHFP        | 0.13536 | 0.75673 | 0.173 | 0.23 | 1 MS.Trt_vs_MS.NoTrt_F |
| PRR14       | 0.13539 | 0.35898 | 0.158 | 0.22 | 1 MS.Trt_vs_MS.NoTrt_F |
| UHRF1BP1L   | 0.1354  | -0.8153 | 0.41  | 0.47 | 1 MS.Trt_vs_MS.NoTrt_F |
| APOBR       | 0.13559 | 0.57508 | 0.165 | 0.23 | 1 MS.Trt_vs_MS.NoTrt_F |
| RP11-894J14 | 0.13573 | -0.5906 | 0.14  | 0.19 | 1 MS.Trt_vs_MS.NoTrt_F |
| DHRS11      | 0.1359  | -0.4056 | 0.291 | 0.37 | 1 MS.Trt_vs_MS.NoTrt_F |
| XKR9        | 0.13598 | 0.35572 | 0.522 | 0.62 | 1 MS.Trt_vs_MS.NoTrt_F |
| GAB1        | 0.13604 | 0.54534 | 0.471 | 0.6  | 1 MS.Trt_vs_MS.NoTrt_F |
| C11orf1     | 0.13605 | 0.34732 | 0.799 | 0.82 | 1 MS.Trt_vs_MS.NoTrt_F |
| WDR73       | 0.13617 | 0.50662 | 0.968 | 0.98 | 1 MS.Trt_vs_MS.NoTrt_F |
| TLE3        | 0.13619 | 1.1304  | 0.234 | 0.34 | 1 MS.Trt_vs_MS.NoTrt_F |
| XYLT1       | 0.13635 | -0.3846 | 0.144 | 0.2  | 1 MS.Trt_vs_MS.NoTrt_F |
| SPATA7      | 0.13636 | 0.51759 | 0.295 | 0.37 | 1 MS.Trt_vs_MS.NoTrt_F |
| UBL4A       | 0.13637 | 0.75264 | 0.122 | 0.18 | 1 MS.Trt_vs_MS.NoTrt_F |
| RHOC        | 0.1364  | 0.42624 | 0.155 | 0.22 | 1 MS.Trt_vs_MS.NoTrt_F |
| NPIPA5      | 0.13641 | -0.3542 | 0.112 | 0.16 | 1 MS.Trt_vs_MS.NoTrt_F |
| MTF2        | 0.13656 | 0.32246 | 0.302 | 0.38 | 1 MS.Trt_vs_MS.NoTrt_F |
| CWC25       | 0.13659 | 0.34545 | 0.396 | 0.46 | 1 MS.Trt_vs_MS.NoTrt_F |
| SERTAD1     | 0.13667 | 0.6585  | 0.367 | 0.45 | 1 MS.Trt_vs_MS.NoTrt_F |
| DUSP14      | 0.13682 | 0.99324 | 0.086 | 0.13 | 1 MS.Trt_vs_MS.NoTrt_F |
| MVD         | 0.13696 | 0.63193 | 0.5   | 0.58 | 1 MS.Trt_vs_MS.NoTrt_F |
| NPIP3       | 0.13704 | 0.72163 | 0.662 | 0.83 | 1 MS.Trt_vs_MS.NoTrt_F |
| FAM213A     | 0.1371  | 0.56011 | 0.773 | 0.87 | 1 MS.Trt_vs_MS.NoTrt_F |
| UBA2        | 0.13735 | -0.533  | 0.568 | 0.62 | 1 MS.Trt_vs_MS.NoTrt_F |
| PPP1R13B    | 0.13736 | -0.3619 | 0.468 | 0.57 | 1 MS.Trt_vs_MS.NoTrt_F |
| TCIRG1      | 0.13736 | 0.39733 | 0.331 | 0.45 | 1 MS.Trt_vs_MS.NoTrt_F |
| CTSK        | 0.13743 | 1.40779 | 0.068 | 0.11 | 1 MS.Trt_vs_MS.NoTrt_F |
| CD101       | 0.1376  | 1.0392  | 0.104 | 0.16 | 1 MS.Trt_vs_MS.NoTrt_F |
| TRIM16L     | 0.13773 | 0.29687 | 0.777 | 0.8  | 1 MS.Trt_vs_MS.NoTrt_F |
| TBPL2       | 0.13782 | 0.29277 | 0.097 | 0.14 | 1 MS.Trt_vs_MS.NoTrt_F |
| MMACHC      | 0.13803 | 0.27154 | 0.906 | 0.89 | 1 MS.Trt_vs_MS.NoTrt_F |
| NBPF20      | 0.13825 | 0.70506 | 0.335 | 0.41 | 1 MS.Trt_vs_MS.NoTrt_F |
| METTTL17    | 0.13832 | 0.54895 | 0.629 | 0.73 | 1 MS.Trt_vs_MS.NoTrt_F |

|            |         |         |       |      |   |                      |
|------------|---------|---------|-------|------|---|----------------------|
| ATP8A1     | 0.13885 | 0.74496 | 0.165 | 0.23 | 1 | MS.Trt_vs_MS.NoTrt_F |
| CTDSP2     | 0.13888 | 0.28571 | 0.191 | 0.27 | 1 | MS.Trt_vs_MS.NoTrt_F |
| PTPN23     | 0.13903 | 0.33656 | 0.144 | 0.2  | 1 | MS.Trt_vs_MS.NoTrt_F |
| ZNF561     | 0.13926 | 0.84864 | 0.514 | 0.61 | 1 | MS.Trt_vs_MS.NoTrt_F |
| FBXL17     | 0.13932 | -1.484  | 0.237 | 0.3  | 1 | MS.Trt_vs_MS.NoTrt_F |
| PINK1      | 0.13954 | 0.25221 | 0.255 | 0.33 | 1 | MS.Trt_vs_MS.NoTrt_F |
| CTD-3105H1 | 0.13957 | -0.5171 | 0.306 | 0.4  | 1 | MS.Trt_vs_MS.NoTrt_F |
| KIAA1462   | 0.14022 | -0.3227 | 0.216 | 0.28 | 1 | MS.Trt_vs_MS.NoTrt_F |
| C11orf57   | 0.1408  | -0.4697 | 0.745 | 0.8  | 1 | MS.Trt_vs_MS.NoTrt_F |
| SOCS2      | 0.141   | 0.43668 | 0.468 | 0.38 | 1 | MS.Trt_vs_MS.NoTrt_F |
| GALNT3     | 0.14107 | 0.75569 | 0.108 | 0.16 | 1 | MS.Trt_vs_MS.NoTrt_F |
| PANK2      | 0.1411  | -0.2787 | 0.522 | 0.56 | 1 | MS.Trt_vs_MS.NoTrt_F |
| GEMIN8     | 0.14128 | 0.26824 | 0.086 | 0.13 | 1 | MS.Trt_vs_MS.NoTrt_F |
| SLC25A11   | 0.14148 | 0.34817 | 0.183 | 0.25 | 1 | MS.Trt_vs_MS.NoTrt_F |
| ITGB4      | 0.14166 | 0.88325 | 0.252 | 0.33 | 1 | MS.Trt_vs_MS.NoTrt_F |
| LETM1      | 0.14179 | 0.62208 | 0.888 | 0.87 | 1 | MS.Trt_vs_MS.NoTrt_F |
| PBX3       | 0.14202 | 0.27383 | 0.086 | 0.13 | 1 | MS.Trt_vs_MS.NoTrt_F |
| RNF220     | 0.14208 | 0.3583  | 0.601 | 0.73 | 1 | MS.Trt_vs_MS.NoTrt_F |
| KNOP1      | 0.14235 | 0.34855 | 0.705 | 0.77 | 1 | MS.Trt_vs_MS.NoTrt_F |
| NFKBID     | 0.14249 | 0.85343 | 0.532 | 0.64 | 1 | MS.Trt_vs_MS.NoTrt_F |
| CES4A      | 0.14289 | -0.5286 | 0.597 | 0.53 | 1 | MS.Trt_vs_MS.NoTrt_F |
| SYCP2      | 0.14294 | 0.59983 | 0.083 | 0.13 | 1 | MS.Trt_vs_MS.NoTrt_F |
| BTBD7      | 0.14299 | 0.61566 | 0.788 | 0.77 | 1 | MS.Trt_vs_MS.NoTrt_F |
| AKAP5      | 0.14309 | -0.4031 | 0.655 | 0.69 | 1 | MS.Trt_vs_MS.NoTrt_F |
| SGCB       | 0.14335 | 0.51528 | 0.302 | 0.37 | 1 | MS.Trt_vs_MS.NoTrt_F |
| ZNF691     | 0.1434  | 0.31361 | 0.083 | 0.13 | 1 | MS.Trt_vs_MS.NoTrt_F |
| BICDL1     | 0.14344 | -0.5107 | 0.583 | 0.66 | 1 | MS.Trt_vs_MS.NoTrt_F |
| NFU1       | 0.14355 | -0.4089 | 0.169 | 0.23 | 1 | MS.Trt_vs_MS.NoTrt_F |
| CARMIL1    | 0.14411 | 0.70476 | 0.259 | 0.32 | 1 | MS.Trt_vs_MS.NoTrt_F |
| GTF2H1     | 0.14411 | -0.5608 | 0.414 | 0.48 | 1 | MS.Trt_vs_MS.NoTrt_F |
| VPS39      | 0.14435 | 0.34328 | 0.493 | 0.56 | 1 | MS.Trt_vs_MS.NoTrt_F |
| KPNA4      | 0.1445  | 0.30009 | 0.59  | 0.69 | 1 | MS.Trt_vs_MS.NoTrt_F |
| CD40       | 0.1448  | -0.7744 | 0.151 | 0.21 | 1 | MS.Trt_vs_MS.NoTrt_F |
| SNUPN      | 0.14481 | 0.46549 | 0.791 | 0.92 | 1 | MS.Trt_vs_MS.NoTrt_F |
| COMMD2     | 0.14482 | 0.86873 | 0.345 | 0.44 | 1 | MS.Trt_vs_MS.NoTrt_F |
| TOR1B      | 0.14486 | 0.6575  | 0.255 | 0.32 | 1 | MS.Trt_vs_MS.NoTrt_F |
| ITGA2      | 0.14486 | -0.5267 | 0.392 | 0.45 | 1 | MS.Trt_vs_MS.NoTrt_F |
| SEC61A1    | 0.14504 | 0.6097  | 0.396 | 0.5  | 1 | MS.Trt_vs_MS.NoTrt_F |
| ADH5       | 0.14516 | 0.49747 | 0.453 | 0.53 | 1 | MS.Trt_vs_MS.NoTrt_F |
| ZNF30      | 0.14544 | 1.66072 | 0.101 | 0.15 | 1 | MS.Trt_vs_MS.NoTrt_F |

|             |         |         |       |      |   |                      |
|-------------|---------|---------|-------|------|---|----------------------|
| ZNF557      | 0.14549 | 0.47854 | 0.867 | 0.91 | 1 | MS.Trt_vs_MS.NoTrt_F |
| MSH3        | 0.14575 | -0.4716 | 0.45  | 0.51 | 1 | MS.Trt_vs_MS.NoTrt_F |
| PLA2G4B     | 0.1459  | 0.79866 | 0.468 | 0.54 | 1 | MS.Trt_vs_MS.NoTrt_F |
| CTC-454I21. | 0.14593 | 0.44844 | 0.205 | 0.28 | 1 | MS.Trt_vs_MS.NoTrt_F |
| TRNAU1AP    | 0.14614 | -0.3925 | 0.878 | 0.92 | 1 | MS.Trt_vs_MS.NoTrt_F |
| DHRS4L2     | 0.1462  | 0.60045 | 0.212 | 0.29 | 1 | MS.Trt_vs_MS.NoTrt_F |
| SIK3        | 0.14641 | 0.41947 | 0.313 | 0.39 | 1 | MS.Trt_vs_MS.NoTrt_F |
| ERCC8       | 0.14662 | 0.5791  | 0.356 | 0.44 | 1 | MS.Trt_vs_MS.NoTrt_F |
| HIST1H1D    | 0.1467  | 0.55101 | 0.104 | 0.16 | 1 | MS.Trt_vs_MS.NoTrt_F |
| ZCCHC7      | 0.14674 | 0.28082 | 0.302 | 0.39 | 1 | MS.Trt_vs_MS.NoTrt_F |
| ZNF763      | 0.14744 | 1.29418 | 0.183 | 0.24 | 1 | MS.Trt_vs_MS.NoTrt_F |
| ACACA       | 0.14755 | -0.9173 | 0.586 | 0.68 | 1 | MS.Trt_vs_MS.NoTrt_F |
| TRMT1       | 0.14766 | 0.44548 | 0.169 | 0.23 | 1 | MS.Trt_vs_MS.NoTrt_F |
| HIF1AN      | 0.1477  | 0.68572 | 0.806 | 0.87 | 1 | MS.Trt_vs_MS.NoTrt_F |
| NARFL       | 0.14775 | 0.50501 | 0.759 | 0.83 | 1 | MS.Trt_vs_MS.NoTrt_F |
| TMEM199     | 0.14819 | -0.5753 | 0.658 | 0.7  | 1 | MS.Trt_vs_MS.NoTrt_F |
| C19orf48    | 0.14832 | -0.4335 | 0.374 | 0.44 | 1 | MS.Trt_vs_MS.NoTrt_F |
| BFSP2       | 0.14835 | 0.58069 | 0.083 | 0.13 | 1 | MS.Trt_vs_MS.NoTrt_F |
| PTGER2      | 0.14837 | 0.64774 | 0.219 | 0.29 | 1 | MS.Trt_vs_MS.NoTrt_F |
| LAMC3       | 0.14846 | 1.66325 | 0.302 | 0.39 | 1 | MS.Trt_vs_MS.NoTrt_F |
| NRIP2       | 0.14853 | 0.50971 | 0.331 | 0.4  | 1 | MS.Trt_vs_MS.NoTrt_F |
| RNF144A     | 0.14861 | 1.67869 | 0.191 | 0.25 | 1 | MS.Trt_vs_MS.NoTrt_F |
| MAP3K3      | 0.14868 | 0.84778 | 0.137 | 0.2  | 1 | MS.Trt_vs_MS.NoTrt_F |
| HNRNPUL1    | 0.14878 | -0.6477 | 0.662 | 0.7  | 1 | MS.Trt_vs_MS.NoTrt_F |
| MRPL30      | 0.14896 | -0.7331 | 0.755 | 0.88 | 1 | MS.Trt_vs_MS.NoTrt_F |
| PNPLA4      | 0.14919 | 0.42767 | 0.252 | 0.33 | 1 | MS.Trt_vs_MS.NoTrt_F |
| IRAK1BP1    | 0.14929 | -0.5193 | 0.608 | 0.7  | 1 | MS.Trt_vs_MS.NoTrt_F |
| CTD-2192J10 | 0.14959 | 0.41033 | 0.194 | 0.26 | 1 | MS.Trt_vs_MS.NoTrt_F |
| SCARB2      | 0.14965 | 0.62165 | 0.324 | 0.4  | 1 | MS.Trt_vs_MS.NoTrt_F |
| LIMS2       | 0.14988 | 1.21006 | 0.083 | 0.13 | 1 | MS.Trt_vs_MS.NoTrt_F |
| MRPS15      | 0.15009 | -0.2892 | 0.572 | 0.62 | 1 | MS.Trt_vs_MS.NoTrt_F |
| CDON        | 0.15024 | -0.3211 | 0.464 | 0.54 | 1 | MS.Trt_vs_MS.NoTrt_F |
| LENG1       | 0.15028 | 0.61016 | 0.133 | 0.19 | 1 | MS.Trt_vs_MS.NoTrt_F |
| SEZ6        | 0.15041 | 1.13469 | 0.112 | 0.16 | 1 | MS.Trt_vs_MS.NoTrt_F |
| E2F5        | 0.15044 | 0.45782 | 0.403 | 0.46 | 1 | MS.Trt_vs_MS.NoTrt_F |
| RPP21       | 0.15068 | 0.77513 | 0.183 | 0.25 | 1 | MS.Trt_vs_MS.NoTrt_F |
| LRP2BP      | 0.15073 | -0.6082 | 0.421 | 0.49 | 1 | MS.Trt_vs_MS.NoTrt_F |
| METTL3      | 0.15077 | 0.47586 | 0.604 | 0.66 | 1 | MS.Trt_vs_MS.NoTrt_F |
| DNASE2      | 0.15086 | 0.52913 | 0.453 | 0.54 | 1 | MS.Trt_vs_MS.NoTrt_F |
| RUFY2       | 0.15106 | 0.59324 | 0.475 | 0.55 | 1 | MS.Trt_vs_MS.NoTrt_F |

|          |         |         |       |      |                        |
|----------|---------|---------|-------|------|------------------------|
| S1PR1    | 0.15107 | 0.47279 | 0.432 | 0.6  | 1 MS.Trt_vs_MS.NoTrt_F |
| TSC2     | 0.15109 | -0.2964 | 0.662 | 0.74 | 1 MS.Trt_vs_MS.NoTrt_F |
| THBS1    | 0.15123 | -1.1012 | 0.248 | 0.3  | 1 MS.Trt_vs_MS.NoTrt_F |
| ZNF425   | 0.15166 | -0.8044 | 0.439 | 0.51 | 1 MS.Trt_vs_MS.NoTrt_F |
| TIMM9    | 0.15168 | 1.0865  | 0.09  | 0.14 | 1 MS.Trt_vs_MS.NoTrt_F |
| DOCK9    | 0.15177 | 0.4375  | 0.302 | 0.37 | 1 MS.Trt_vs_MS.NoTrt_F |
| MBD4     | 0.15209 | 0.61607 | 0.259 | 0.33 | 1 MS.Trt_vs_MS.NoTrt_F |
| GCNT2    | 0.15229 | 0.27686 | 0.745 | 0.7  | 1 MS.Trt_vs_MS.NoTrt_F |
| GALNT1   | 0.15238 | 2.50247 | 0.101 | 0.15 | 1 MS.Trt_vs_MS.NoTrt_F |
| CACFD1   | 0.15285 | 0.64303 | 0.079 | 0.12 | 1 MS.Trt_vs_MS.NoTrt_F |
| DDX27    | 0.15308 | 0.29319 | 0.644 | 0.72 | 1 MS.Trt_vs_MS.NoTrt_F |
| ZNF33B   | 0.15313 | 0.92889 | 0.507 | 0.45 | 1 MS.Trt_vs_MS.NoTrt_F |
| MED24    | 0.15319 | -1.0169 | 0.608 | 0.64 | 1 MS.Trt_vs_MS.NoTrt_F |
| ZBTB41   | 0.15499 | 1.34278 | 0.083 | 0.13 | 1 MS.Trt_vs_MS.NoTrt_F |
| SNRNP200 | 0.15549 | 0.51598 | 0.759 | 0.83 | 1 MS.Trt_vs_MS.NoTrt_F |
| RBMXL1   | 0.15557 | -0.7049 | 0.129 | 0.18 | 1 MS.Trt_vs_MS.NoTrt_F |
| SLC39A3  | 0.1558  | 0.45546 | 0.576 | 0.68 | 1 MS.Trt_vs_MS.NoTrt_F |
| GBP4     | 0.15592 | -0.3632 | 0.723 | 0.78 | 1 MS.Trt_vs_MS.NoTrt_F |
| NCR3     | 0.15594 | 0.91889 | 0.115 | 0.17 | 1 MS.Trt_vs_MS.NoTrt_F |
| SULT1A3  | 0.15597 | 0.38803 | 0.629 | 0.73 | 1 MS.Trt_vs_MS.NoTrt_F |
| GSDMD    | 0.1561  | 0.25019 | 0.802 | 0.86 | 1 MS.Trt_vs_MS.NoTrt_F |
| RNFT1    | 0.15612 | 0.74032 | 0.388 | 0.45 | 1 MS.Trt_vs_MS.NoTrt_F |
| AGO1     | 0.15647 | 0.27141 | 0.442 | 0.53 | 1 MS.Trt_vs_MS.NoTrt_F |
| MT-CYB   | 0.15692 | 0.54466 | 0.719 | 0.79 | 1 MS.Trt_vs_MS.NoTrt_F |
| QRICH2   | 0.15718 | 0.47053 | 0.198 | 0.27 | 1 MS.Trt_vs_MS.NoTrt_F |
| DYDC1    | 0.15722 | -0.3512 | 0.489 | 0.58 | 1 MS.Trt_vs_MS.NoTrt_F |
| PPM1N    | 0.15725 | 0.6614  | 0.137 | 0.19 | 1 MS.Trt_vs_MS.NoTrt_F |
| MBTPS2   | 0.15737 | -0.5993 | 0.32  | 0.38 | 1 MS.Trt_vs_MS.NoTrt_F |
| C19orf52 | 0.15748 | 0.45695 | 0.313 | 0.38 | 1 MS.Trt_vs_MS.NoTrt_F |
| ANKRD42  | 0.15752 | -0.5488 | 0.388 | 0.48 | 1 MS.Trt_vs_MS.NoTrt_F |
| UBE2V1   | 0.15762 | 0.48569 | 0.424 | 0.54 | 1 MS.Trt_vs_MS.NoTrt_F |
| RAE1     | 0.15782 | 1.06477 | 0.133 | 0.19 | 1 MS.Trt_vs_MS.NoTrt_F |
| LRMP     | 0.15791 | 0.3296  | 0.122 | 0.18 | 1 MS.Trt_vs_MS.NoTrt_F |
| DET1     | 0.15806 | 0.3452  | 0.543 | 0.59 | 1 MS.Trt_vs_MS.NoTrt_F |
| KLHL2    | 0.15813 | 1.21009 | 0.335 | 0.39 | 1 MS.Trt_vs_MS.NoTrt_F |
| PIGP     | 0.15815 | -0.4751 | 0.781 | 0.81 | 1 MS.Trt_vs_MS.NoTrt_F |
| LIX1L    | 0.1584  | 0.36107 | 0.824 | 0.79 | 1 MS.Trt_vs_MS.NoTrt_F |
| ICE2     | 0.1585  | -0.4278 | 0.842 | 0.85 | 1 MS.Trt_vs_MS.NoTrt_F |
| RFX2     | 0.1585  | 0.63324 | 0.475 | 0.53 | 1 MS.Trt_vs_MS.NoTrt_F |
| ZNF652   | 0.15853 | 0.51478 | 0.532 | 0.61 | 1 MS.Trt_vs_MS.NoTrt_F |

|           |         |         |       |      |   |                      |
|-----------|---------|---------|-------|------|---|----------------------|
| ATG12     | 0.15864 | 0.39746 | 0.77  | 0.82 | 1 | MS.Trt_vs_MS.NoTrt_F |
| DRAXIN    | 0.15883 | 0.33145 | 0.835 | 0.85 | 1 | MS.Trt_vs_MS.NoTrt_F |
| VAT1      | 0.15888 | 0.5274  | 0.137 | 0.19 | 1 | MS.Trt_vs_MS.NoTrt_F |
| SLX4      | 0.15903 | -0.7355 | 0.496 | 0.56 | 1 | MS.Trt_vs_MS.NoTrt_F |
| TMEM256-P | 0.15905 | 0.79887 | 0.489 | 0.53 | 1 | MS.Trt_vs_MS.NoTrt_F |
| NANS      | 0.15925 | 0.67926 | 0.766 | 0.81 | 1 | MS.Trt_vs_MS.NoTrt_F |
| LLGL1     | 0.15926 | -0.7956 | 0.295 | 0.35 | 1 | MS.Trt_vs_MS.NoTrt_F |
| USP6      | 0.15974 | -0.3633 | 0.147 | 0.2  | 1 | MS.Trt_vs_MS.NoTrt_F |
| POLR3H    | 0.15993 | -0.4657 | 0.295 | 0.35 | 1 | MS.Trt_vs_MS.NoTrt_F |
| FASTKD3   | 0.16001 | 0.82828 | 0.104 | 0.15 | 1 | MS.Trt_vs_MS.NoTrt_F |
| RARS      | 0.16013 | 0.34531 | 0.493 | 0.54 | 1 | MS.Trt_vs_MS.NoTrt_F |
| BRI3      | 0.16016 | 0.37968 | 0.928 | 0.91 | 1 | MS.Trt_vs_MS.NoTrt_F |
| PPP2R3A   | 0.16028 | 0.28023 | 0.705 | 0.81 | 1 | MS.Trt_vs_MS.NoTrt_F |
| C19orf44  | 0.16033 | -0.6669 | 0.349 | 0.43 | 1 | MS.Trt_vs_MS.NoTrt_F |
| PPP3CA    | 0.16036 | 0.64669 | 0.561 | 0.69 | 1 | MS.Trt_vs_MS.NoTrt_F |
| PKD1      | 0.16058 | -0.6955 | 0.353 | 0.43 | 1 | MS.Trt_vs_MS.NoTrt_F |
| WBP11     | 0.16067 | 0.38926 | 0.299 | 0.39 | 1 | MS.Trt_vs_MS.NoTrt_F |
| PGAP2     | 0.16088 | 0.91981 | 0.094 | 0.14 | 1 | MS.Trt_vs_MS.NoTrt_F |
| MOB3A     | 0.16105 | 0.32591 | 0.835 | 0.86 | 1 | MS.Trt_vs_MS.NoTrt_F |
| TEX14     | 0.1613  | 1.5643  | 0.112 | 0.16 | 1 | MS.Trt_vs_MS.NoTrt_F |
| COQ6      | 0.16161 | 0.39234 | 0.755 | 0.75 | 1 | MS.Trt_vs_MS.NoTrt_F |
| SSBP1     | 0.16215 | 0.51363 | 0.687 | 0.75 | 1 | MS.Trt_vs_MS.NoTrt_F |
| YIPF1     | 0.16228 | 1.77272 | 0.112 | 0.16 | 1 | MS.Trt_vs_MS.NoTrt_F |
| SAP30BP   | 0.16231 | 0.36545 | 0.234 | 0.31 | 1 | MS.Trt_vs_MS.NoTrt_F |
| NECAB1    | 0.16264 | 0.26608 | 0.144 | 0.19 | 1 | MS.Trt_vs_MS.NoTrt_F |
| SPA17     | 0.16372 | 0.29865 | 0.252 | 0.32 | 1 | MS.Trt_vs_MS.NoTrt_F |
| USP33     | 0.16384 | 0.76451 | 0.867 | 0.95 | 1 | MS.Trt_vs_MS.NoTrt_F |
| AP5B1     | 0.16411 | -1.0033 | 0.288 | 0.37 | 1 | MS.Trt_vs_MS.NoTrt_F |
| SLC16A3   | 0.16421 | 0.55849 | 0.622 | 0.55 | 1 | MS.Trt_vs_MS.NoTrt_F |
| CWF19L2   | 0.16425 | 0.27452 | 0.299 | 0.38 | 1 | MS.Trt_vs_MS.NoTrt_F |
| SIRT5     | 0.16463 | 0.31494 | 0.791 | 0.86 | 1 | MS.Trt_vs_MS.NoTrt_F |
| TMEM185B  | 0.16501 | -1.5171 | 0.338 | 0.39 | 1 | MS.Trt_vs_MS.NoTrt_F |
| CFL2      | 0.16509 | 0.3196  | 0.626 | 0.74 | 1 | MS.Trt_vs_MS.NoTrt_F |
| GPATCH2   | 0.1651  | 0.98805 | 0.604 | 0.5  | 1 | MS.Trt_vs_MS.NoTrt_F |
| CCDC18    | 0.16576 | 0.2649  | 0.198 | 0.26 | 1 | MS.Trt_vs_MS.NoTrt_F |
| GDE1      | 0.16581 | -0.9378 | 0.277 | 0.34 | 1 | MS.Trt_vs_MS.NoTrt_F |
| COPS6     | 0.16591 | 0.60757 | 0.723 | 0.66 | 1 | MS.Trt_vs_MS.NoTrt_F |
| SUMO4     | 0.16636 | 0.68562 | 0.068 | 0.11 | 1 | MS.Trt_vs_MS.NoTrt_F |
| ZNF845    | 0.16695 | 0.82552 | 0.651 | 0.59 | 1 | MS.Trt_vs_MS.NoTrt_F |
| SLC35C1   | 0.16706 | 0.79963 | 0.09  | 0.13 | 1 | MS.Trt_vs_MS.NoTrt_F |

|             |         |         |       |      |   |                      |
|-------------|---------|---------|-------|------|---|----------------------|
| CARD10      | 0.16716 | 0.30626 | 0.108 | 0.16 | 1 | MS.Trt_vs_MS.NoTrt_F |
| MRFAP1      | 0.16751 | 0.4519  | 0.338 | 0.41 | 1 | MS.Trt_vs_MS.NoTrt_F |
| MS4A6A      | 0.16752 | 0.38535 | 0.176 | 0.23 | 1 | MS.Trt_vs_MS.NoTrt_F |
| DGKQ        | 0.16772 | 2.2955  | 0.094 | 0.14 | 1 | MS.Trt_vs_MS.NoTrt_F |
| ADAT1       | 0.16829 | -0.6799 | 0.705 | 0.73 | 1 | MS.Trt_vs_MS.NoTrt_F |
| TBL3        | 0.16842 | 0.57097 | 0.27  | 0.34 | 1 | MS.Trt_vs_MS.NoTrt_F |
| WNT9A       | 0.16856 | 0.50362 | 0.108 | 0.15 | 1 | MS.Trt_vs_MS.NoTrt_F |
| DUSP3       | 0.16871 | -0.3577 | 0.77  | 0.69 | 1 | MS.Trt_vs_MS.NoTrt_F |
| ANXA4       | 0.16902 | 0.58897 | 0.86  | 0.81 | 1 | MS.Trt_vs_MS.NoTrt_F |
| RP11-43511C | 0.16922 | -0.427  | 0.36  | 0.45 | 1 | MS.Trt_vs_MS.NoTrt_F |
| HEMK1       | 0.16929 | 0.72746 | 0.96  | 0.97 | 1 | MS.Trt_vs_MS.NoTrt_F |
| SGF29       | 0.16967 | 0.61866 | 0.309 | 0.37 | 1 | MS.Trt_vs_MS.NoTrt_F |
| MDFC        | 0.16972 | -0.5785 | 0.356 | 0.41 | 1 | MS.Trt_vs_MS.NoTrt_F |
| MRM2        | 0.17024 | 0.36011 | 0.32  | 0.39 | 1 | MS.Trt_vs_MS.NoTrt_F |
| NSUN4       | 0.17043 | 0.27108 | 0.73  | 0.81 | 1 | MS.Trt_vs_MS.NoTrt_F |
| ZNF2        | 0.17054 | 0.9067  | 0.313 | 0.38 | 1 | MS.Trt_vs_MS.NoTrt_F |
| TMEM260     | 0.17075 | -0.5258 | 0.374 | 0.45 | 1 | MS.Trt_vs_MS.NoTrt_F |
| TRPV1       | 0.17078 | 0.48348 | 0.446 | 0.54 | 1 | MS.Trt_vs_MS.NoTrt_F |
| PLEKHM2     | 0.17088 | -0.72   | 0.068 | 0.11 | 1 | MS.Trt_vs_MS.NoTrt_F |
| PDCL3       | 0.17113 | 0.73249 | 0.147 | 0.21 | 1 | MS.Trt_vs_MS.NoTrt_F |
| SSB         | 0.17118 | 0.56778 | 0.727 | 0.83 | 1 | MS.Trt_vs_MS.NoTrt_F |
| LPAR5       | 0.17118 | 1.93722 | 0.097 | 0.14 | 1 | MS.Trt_vs_MS.NoTrt_F |
| GSTT1       | 0.1713  | 0.66542 | 0.687 | 0.81 | 1 | MS.Trt_vs_MS.NoTrt_F |
| FBXO25      | 0.17143 | 0.76357 | 0.356 | 0.41 | 1 | MS.Trt_vs_MS.NoTrt_F |
| KIAA1683    | 0.17147 | -0.3129 | 0.604 | 0.67 | 1 | MS.Trt_vs_MS.NoTrt_F |
| SMAD5       | 0.17166 | 0.65285 | 0.471 | 0.45 | 1 | MS.Trt_vs_MS.NoTrt_F |
| DNAH6       | 0.17175 | 0.56114 | 0.219 | 0.29 | 1 | MS.Trt_vs_MS.NoTrt_F |
| SERP1       | 0.17186 | 0.60313 | 0.594 | 0.71 | 1 | MS.Trt_vs_MS.NoTrt_F |
| EDEM1       | 0.17188 | 1.01743 | 0.317 | 0.43 | 1 | MS.Trt_vs_MS.NoTrt_F |
| SWAP70      | 0.17189 | 0.34134 | 0.399 | 0.49 | 1 | MS.Trt_vs_MS.NoTrt_F |
| CDK2        | 0.17218 | -0.4199 | 0.104 | 0.15 | 1 | MS.Trt_vs_MS.NoTrt_F |
| B3GALNT2    | 0.17252 | -0.4191 | 0.626 | 0.72 | 1 | MS.Trt_vs_MS.NoTrt_F |
| EIF2A       | 0.17275 | 0.33843 | 0.608 | 0.68 | 1 | MS.Trt_vs_MS.NoTrt_F |
| KIF19       | 0.17275 | -0.5794 | 0.392 | 0.45 | 1 | MS.Trt_vs_MS.NoTrt_F |
| MLLT1       | 0.17306 | 1.09756 | 0.097 | 0.14 | 1 | MS.Trt_vs_MS.NoTrt_F |
| ZNF689      | 0.17315 | 1.43359 | 0.076 | 0.12 | 1 | MS.Trt_vs_MS.NoTrt_F |
| POLR3B      | 0.17322 | -0.6172 | 0.137 | 0.19 | 1 | MS.Trt_vs_MS.NoTrt_F |
| SLC25A4     | 0.17342 | 0.80478 | 0.306 | 0.38 | 1 | MS.Trt_vs_MS.NoTrt_F |
| FGGY        | 0.1735  | 0.50519 | 0.442 | 0.53 | 1 | MS.Trt_vs_MS.NoTrt_F |
| ZNF566      | 0.17353 | -0.2858 | 0.878 | 0.87 | 1 | MS.Trt_vs_MS.NoTrt_F |

|            |         |         |       |      |                        |
|------------|---------|---------|-------|------|------------------------|
| TP53BP2    | 0.17365 | 1.3157  | 0.18  | 0.24 | 1 MS.Trt_vs_MS.NoTrt_F |
| IL12RB2    | 0.17384 | 0.9887  | 0.108 | 0.16 | 1 MS.Trt_vs_MS.NoTrt_F |
| SLC25A17   | 0.17392 | 0.3442  | 0.324 | 0.4  | 1 MS.Trt_vs_MS.NoTrt_F |
| PTPA       | 0.17431 | -0.3339 | 0.727 | 0.82 | 1 MS.Trt_vs_MS.NoTrt_F |
| MAN2A2     | 0.17431 | 1.12752 | 0.309 | 0.37 | 1 MS.Trt_vs_MS.NoTrt_F |
| GSTM4      | 0.17439 | 2.19047 | 0.115 | 0.17 | 1 MS.Trt_vs_MS.NoTrt_F |
| CCL5       | 0.17476 | 1.28259 | 0.899 | 0.94 | 1 MS.Trt_vs_MS.NoTrt_F |
| COL15A1    | 0.17488 | 0.69925 | 0.363 | 0.32 | 1 MS.Trt_vs_MS.NoTrt_F |
| ANKRD39    | 0.17539 | 0.89645 | 0.252 | 0.33 | 1 MS.Trt_vs_MS.NoTrt_F |
| C20orf194  | 0.17543 | 0.90649 | 0.331 | 0.41 | 1 MS.Trt_vs_MS.NoTrt_F |
| ZNF678     | 0.1756  | 0.97595 | 0.194 | 0.25 | 1 MS.Trt_vs_MS.NoTrt_F |
| ANKRD12    | 0.17595 | 0.47674 | 0.791 | 0.87 | 1 MS.Trt_vs_MS.NoTrt_F |
| AL928654.7 | 0.1761  | 0.27794 | 0.072 | 0.11 | 1 MS.Trt_vs_MS.NoTrt_F |
| RPP38      | 0.17674 | -0.449  | 0.428 | 0.5  | 1 MS.Trt_vs_MS.NoTrt_F |
| CAPS       | 0.17698 | -0.4479 | 0.953 | 0.94 | 1 MS.Trt_vs_MS.NoTrt_F |
| RFK        | 0.17758 | 0.58733 | 0.496 | 0.53 | 1 MS.Trt_vs_MS.NoTrt_F |
| SYPL1      | 0.17781 | 0.34219 | 0.414 | 0.48 | 1 MS.Trt_vs_MS.NoTrt_F |
| CA13       | 0.17792 | 0.62403 | 0.536 | 0.65 | 1 MS.Trt_vs_MS.NoTrt_F |
| FUOM       | 0.17805 | 0.44525 | 0.068 | 0.11 | 1 MS.Trt_vs_MS.NoTrt_F |
| ZDHHC14    | 0.17807 | 0.26402 | 0.356 | 0.44 | 1 MS.Trt_vs_MS.NoTrt_F |
| BOLA2B     | 0.17813 | 0.43261 | 0.158 | 0.22 | 1 MS.Trt_vs_MS.NoTrt_F |
| PTDSS2     | 0.1782  | 1.46422 | 0.094 | 0.14 | 1 MS.Trt_vs_MS.NoTrt_F |
| ZMIZ1      | 0.1785  | 1.13193 | 0.14  | 0.19 | 1 MS.Trt_vs_MS.NoTrt_F |
| PUS3       | 0.17872 | 0.88377 | 0.309 | 0.39 | 1 MS.Trt_vs_MS.NoTrt_F |
| LRFN3      | 0.17926 | -0.3999 | 0.597 | 0.67 | 1 MS.Trt_vs_MS.NoTrt_F |
| JAKMIP2    | 0.17966 | 0.87961 | 0.442 | 0.51 | 1 MS.Trt_vs_MS.NoTrt_F |
| IL1R1      | 0.17984 | 2.21598 | 0.324 | 0.39 | 1 MS.Trt_vs_MS.NoTrt_F |
| PARP2      | 0.18015 | -0.4933 | 0.342 | 0.42 | 1 MS.Trt_vs_MS.NoTrt_F |
| ZNF202     | 0.18024 | 0.84975 | 0.072 | 0.11 | 1 MS.Trt_vs_MS.NoTrt_F |
| NDUFA3     | 0.18047 | 0.35997 | 0.946 | 0.95 | 1 MS.Trt_vs_MS.NoTrt_F |
| RP11-111H1 | 0.18068 | -0.3965 | 0.137 | 0.18 | 1 MS.Trt_vs_MS.NoTrt_F |
| TOB2       | 0.18095 | 0.6916  | 0.165 | 0.23 | 1 MS.Trt_vs_MS.NoTrt_F |
| PKNOX2     | 0.18109 | 0.56495 | 0.097 | 0.14 | 1 MS.Trt_vs_MS.NoTrt_F |
| PPP6R1     | 0.18119 | 0.40887 | 0.309 | 0.39 | 1 MS.Trt_vs_MS.NoTrt_F |
| PSME1      | 0.18123 | 0.25912 | 0.576 | 0.73 | 1 MS.Trt_vs_MS.NoTrt_F |
| NDUFV3     | 0.18143 | 0.27072 | 0.982 | 0.99 | 1 MS.Trt_vs_MS.NoTrt_F |
| UBE2Z      | 0.18167 | 0.64101 | 0.288 | 0.34 | 1 MS.Trt_vs_MS.NoTrt_F |
| DDX54      | 0.18174 | 0.75418 | 0.158 | 0.22 | 1 MS.Trt_vs_MS.NoTrt_F |
| JCHAIN     | 0.18236 | 4.37604 | 0.133 | 0.18 | 1 MS.Trt_vs_MS.NoTrt_F |
| SEPP1      | 0.1825  | 0.83962 | 0.162 | 0.22 | 1 MS.Trt_vs_MS.NoTrt_F |

|          |         |         |       |      |                        |
|----------|---------|---------|-------|------|------------------------|
| FBXL2    | 0.18292 | -0.3195 | 0.665 | 0.61 | 1 MS.Trt_vs_MS.NoTrt_F |
| ENDOV    | 0.18293 | -0.8085 | 0.604 | 0.66 | 1 MS.Trt_vs_MS.NoTrt_F |
| ZNF124   | 0.18314 | 1.19336 | 0.665 | 0.67 | 1 MS.Trt_vs_MS.NoTrt_F |
| FBXO36   | 0.18317 | 0.29203 | 0.687 | 0.66 | 1 MS.Trt_vs_MS.NoTrt_F |
| DACT3    | 0.18336 | 0.25202 | 0.95  | 0.95 | 1 MS.Trt_vs_MS.NoTrt_F |
| ZNF354A  | 0.18363 | 0.49748 | 0.216 | 0.28 | 1 MS.Trt_vs_MS.NoTrt_F |
| CTTN     | 0.18368 | 0.88343 | 0.112 | 0.16 | 1 MS.Trt_vs_MS.NoTrt_F |
| PEA15    | 0.18375 | 0.91167 | 0.133 | 0.19 | 1 MS.Trt_vs_MS.NoTrt_F |
| GAREM1   | 0.18378 | 0.5335  | 0.101 | 0.07 | 1 MS.Trt_vs_MS.NoTrt_F |
| QKI      | 0.18388 | 0.32288 | 0.327 | 0.42 | 1 MS.Trt_vs_MS.NoTrt_F |
| ZNF16    | 0.18422 | 0.2864  | 0.77  | 0.83 | 1 MS.Trt_vs_MS.NoTrt_F |
| NSA2     | 0.18428 | 0.71817 | 0.367 | 0.44 | 1 MS.Trt_vs_MS.NoTrt_F |
| ZNF254   | 0.18467 | 0.26223 | 0.45  | 0.48 | 1 MS.Trt_vs_MS.NoTrt_F |
| SRRD     | 0.18488 | 0.6349  | 0.453 | 0.54 | 1 MS.Trt_vs_MS.NoTrt_F |
| ERO1A    | 0.1849  | 0.56916 | 0.899 | 0.9  | 1 MS.Trt_vs_MS.NoTrt_F |
| CHP1     | 0.18496 | 0.91268 | 0.781 | 0.82 | 1 MS.Trt_vs_MS.NoTrt_F |
| DNAJA2   | 0.18521 | 0.35359 | 0.428 | 0.49 | 1 MS.Trt_vs_MS.NoTrt_F |
| NUP35    | 0.18532 | 0.64301 | 0.504 | 0.61 | 1 MS.Trt_vs_MS.NoTrt_F |
| GMEB2    | 0.18535 | 0.68765 | 0.122 | 0.17 | 1 MS.Trt_vs_MS.NoTrt_F |
| SGK3     | 0.18547 | -0.2527 | 0.874 | 0.96 | 1 MS.Trt_vs_MS.NoTrt_F |
| WDR20    | 0.18557 | 0.49469 | 0.432 | 0.53 | 1 MS.Trt_vs_MS.NoTrt_F |
| ITIH4    | 0.18574 | 0.68096 | 0.248 | 0.32 | 1 MS.Trt_vs_MS.NoTrt_F |
| ETNK1    | 0.18628 | 0.38348 | 0.514 | 0.63 | 1 MS.Trt_vs_MS.NoTrt_F |
| CRTAM    | 0.18629 | 0.80952 | 0.381 | 0.46 | 1 MS.Trt_vs_MS.NoTrt_F |
| KTN1     | 0.18653 | 0.40344 | 0.565 | 0.71 | 1 MS.Trt_vs_MS.NoTrt_F |
| B3GALNT1 | 0.18653 | 0.52169 | 0.205 | 0.27 | 1 MS.Trt_vs_MS.NoTrt_F |
| OXCT1    | 0.18669 | 0.81763 | 0.36  | 0.46 | 1 MS.Trt_vs_MS.NoTrt_F |
| RBM43    | 0.18705 | -0.5862 | 0.601 | 0.66 | 1 MS.Trt_vs_MS.NoTrt_F |
| SELENBP1 | 0.18715 | 1.14806 | 0.273 | 0.33 | 1 MS.Trt_vs_MS.NoTrt_F |
| FUT2     | 0.18731 | 0.28947 | 0.759 | 0.77 | 1 MS.Trt_vs_MS.NoTrt_F |
| MSMO1    | 0.18735 | 0.4512  | 0.543 | 0.6  | 1 MS.Trt_vs_MS.NoTrt_F |
| GATC     | 0.18748 | -0.4045 | 0.532 | 0.6  | 1 MS.Trt_vs_MS.NoTrt_F |
| SERPINB8 | 0.18761 | -0.3751 | 0.079 | 0.12 | 1 MS.Trt_vs_MS.NoTrt_F |
| TBK1     | 0.18789 | 0.60553 | 0.122 | 0.17 | 1 MS.Trt_vs_MS.NoTrt_F |
| HCST     | 0.18792 | 0.66219 | 0.374 | 0.54 | 1 MS.Trt_vs_MS.NoTrt_F |
| ZNF226   | 0.18801 | 0.26667 | 0.504 | 0.57 | 1 MS.Trt_vs_MS.NoTrt_F |
| NRL      | 0.18853 | 0.62444 | 0.09  | 0.13 | 1 MS.Trt_vs_MS.NoTrt_F |
| RER1     | 0.18858 | 0.68979 | 0.227 | 0.3  | 1 MS.Trt_vs_MS.NoTrt_F |
| PDK3     | 0.18862 | 0.85985 | 0.331 | 0.41 | 1 MS.Trt_vs_MS.NoTrt_F |
| SMAD1    | 0.1889  | 1.64793 | 0.331 | 0.4  | 1 MS.Trt_vs_MS.NoTrt_F |



|           |         |         |       |      |   |                      |
|-----------|---------|---------|-------|------|---|----------------------|
| FABP5     | 0.18926 | 0.28766 | 0.101 | 0.14 | 1 | MS.Trt_vs_MS.NoTrt_F |
| TMPRSS11B | 0.18938 | 0.50485 | 0.374 | 0.46 | 1 | MS.Trt_vs_MS.NoTrt_F |
| NNMT      | 0.19043 | 0.56659 | 0.119 | 0.17 | 1 | MS.Trt_vs_MS.NoTrt_F |
| CYSTM1    | 0.19047 | 0.29403 | 0.331 | 0.4  | 1 | MS.Trt_vs_MS.NoTrt_F |
| NCF2      | 0.19057 | 1.27303 | 0.086 | 0.13 | 1 | MS.Trt_vs_MS.NoTrt_F |
| RARS2     | 0.19075 | -0.2936 | 0.594 | 0.63 | 1 | MS.Trt_vs_MS.NoTrt_F |
| KIF3C     | 0.19091 | -0.8004 | 0.094 | 0.13 | 1 | MS.Trt_vs_MS.NoTrt_F |
| INTS4     | 0.19123 | -0.3768 | 0.396 | 0.44 | 1 | MS.Trt_vs_MS.NoTrt_F |
| INCA1     | 0.1916  | 0.73698 | 0.216 | 0.28 | 1 | MS.Trt_vs_MS.NoTrt_F |
| SSX2IP    | 0.19175 | 0.7859  | 0.097 | 0.14 | 1 | MS.Trt_vs_MS.NoTrt_F |
| GPLD1     | 0.19176 | 0.69318 | 0.723 | 0.71 | 1 | MS.Trt_vs_MS.NoTrt_F |
| ADD1      | 0.1919  | 0.26674 | 0.784 | 0.81 | 1 | MS.Trt_vs_MS.NoTrt_F |
| LAMA4     | 0.19257 | 0.95285 | 0.234 | 0.3  | 1 | MS.Trt_vs_MS.NoTrt_F |
| ALKBH6    | 0.1928  | -0.8712 | 0.572 | 0.6  | 1 | MS.Trt_vs_MS.NoTrt_F |
| TTF1      | 0.19304 | -0.3313 | 0.45  | 0.51 | 1 | MS.Trt_vs_MS.NoTrt_F |
| CXCL14    | 0.19307 | 1.50284 | 0.147 | 0.2  | 1 | MS.Trt_vs_MS.NoTrt_F |
| SMARCD2   | 0.19309 | 1.04074 | 0.147 | 0.2  | 1 | MS.Trt_vs_MS.NoTrt_F |
| CDK7      | 0.19309 | 1.24205 | 0.216 | 0.29 | 1 | MS.Trt_vs_MS.NoTrt_F |
| EPS8      | 0.19361 | 0.56257 | 0.464 | 0.54 | 1 | MS.Trt_vs_MS.NoTrt_F |
| TIMELESS  | 0.19363 | 0.3976  | 0.371 | 0.44 | 1 | MS.Trt_vs_MS.NoTrt_F |
| ZNF486    | 0.19432 | -0.2918 | 0.698 | 0.76 | 1 | MS.Trt_vs_MS.NoTrt_F |
| GEN1      | 0.19442 | 0.2657  | 0.755 | 0.75 | 1 | MS.Trt_vs_MS.NoTrt_F |
| WDR41     | 0.19449 | -0.3698 | 0.399 | 0.48 | 1 | MS.Trt_vs_MS.NoTrt_F |
| IL15      | 0.1946  | -0.9399 | 0.356 | 0.41 | 1 | MS.Trt_vs_MS.NoTrt_F |
| CYTH3     | 0.19479 | -0.9046 | 0.076 | 0.11 | 1 | MS.Trt_vs_MS.NoTrt_F |
| DCTN2     | 0.19565 | -0.4454 | 0.565 | 0.65 | 1 | MS.Trt_vs_MS.NoTrt_F |
| PRKRA     | 0.19584 | 0.40666 | 0.259 | 0.33 | 1 | MS.Trt_vs_MS.NoTrt_F |
| NCF1      | 0.19628 | 0.45171 | 0.496 | 0.6  | 1 | MS.Trt_vs_MS.NoTrt_F |
| NME6      | 0.19636 | -0.3381 | 0.874 | 0.92 | 1 | MS.Trt_vs_MS.NoTrt_F |
| GEMIN6    | 0.19642 | 0.5371  | 0.917 | 0.93 | 1 | MS.Trt_vs_MS.NoTrt_F |
| XPO6      | 0.19647 | 0.37776 | 0.324 | 0.42 | 1 | MS.Trt_vs_MS.NoTrt_F |
| SVIL      | 0.19661 | 0.8261  | 0.191 | 0.26 | 1 | MS.Trt_vs_MS.NoTrt_F |
| C2orf61   | 0.19703 | 0.28124 | 0.14  | 0.19 | 1 | MS.Trt_vs_MS.NoTrt_F |
| REEP3     | 0.19735 | 1.34922 | 0.532 | 0.53 | 1 | MS.Trt_vs_MS.NoTrt_F |
| SNAP23    | 0.19775 | 0.28551 | 0.655 | 0.74 | 1 | MS.Trt_vs_MS.NoTrt_F |
| DAZAP2    | 0.19782 | 0.32433 | 0.806 | 0.92 | 1 | MS.Trt_vs_MS.NoTrt_F |
| GTF2F1    | 0.19796 | 0.35214 | 0.309 | 0.39 | 1 | MS.Trt_vs_MS.NoTrt_F |
| RALB      | 0.198   | 0.90672 | 0.133 | 0.18 | 1 | MS.Trt_vs_MS.NoTrt_F |
| FRMD4B    | 0.1984  | -0.9718 | 0.96  | 0.96 | 1 | MS.Trt_vs_MS.NoTrt_F |
| CHI3L2    | 0.19845 | 1.15142 | 0.219 | 0.28 | 1 | MS.Trt_vs_MS.NoTrt_F |

|          |         |         |       |      |                        |
|----------|---------|---------|-------|------|------------------------|
| P4HTM    | 0.19902 | -0.4259 | 0.396 | 0.44 | 1 MS.Trt_vs_MS.NoTrt_F |
| ATP10A   | 0.19925 | 1.86202 | 0.115 | 0.17 | 1 MS.Trt_vs_MS.NoTrt_F |
| ARHGAP44 | 0.19937 | 0.98503 | 0.313 | 0.36 | 1 MS.Trt_vs_MS.NoTrt_F |
| TMEM108  | 0.19953 | -0.407  | 0.309 | 0.37 | 1 MS.Trt_vs_MS.NoTrt_F |
| WDR78    | 0.20017 | -0.2832 | 0.486 | 0.54 | 1 MS.Trt_vs_MS.NoTrt_F |
| CHFR     | 0.20037 | 0.53871 | 0.942 | 0.96 | 1 MS.Trt_vs_MS.NoTrt_F |
| GALE     | 0.20044 | 0.34945 | 0.342 | 0.4  | 1 MS.Trt_vs_MS.NoTrt_F |
| IFI27L2  | 0.20064 | 0.37517 | 0.263 | 0.32 | 1 MS.Trt_vs_MS.NoTrt_F |
| ZSCAN22  | 0.20065 | -0.7382 | 0.486 | 0.57 | 1 MS.Trt_vs_MS.NoTrt_F |
| SIKE1    | 0.20079 | 0.28803 | 0.453 | 0.5  | 1 MS.Trt_vs_MS.NoTrt_F |
| DPEP2    | 0.20081 | 0.46775 | 0.227 | 0.29 | 1 MS.Trt_vs_MS.NoTrt_F |
| NFIC     | 0.20111 | 0.27795 | 0.432 | 0.49 | 1 MS.Trt_vs_MS.NoTrt_F |
| NINJ1    | 0.20143 | 0.65933 | 0.543 | 0.65 | 1 MS.Trt_vs_MS.NoTrt_F |
| ZNF23    | 0.2015  | -0.5363 | 0.371 | 0.42 | 1 MS.Trt_vs_MS.NoTrt_F |
| LYPLA1   | 0.20165 | 0.51315 | 0.522 | 0.62 | 1 MS.Trt_vs_MS.NoTrt_F |
| MRPS27   | 0.20207 | -0.765  | 0.543 | 0.56 | 1 MS.Trt_vs_MS.NoTrt_F |
| ZNF562   | 0.2021  | -0.5737 | 0.986 | 0.97 | 1 MS.Trt_vs_MS.NoTrt_F |
| CENPO    | 0.2022  | 0.47271 | 0.079 | 0.12 | 1 MS.Trt_vs_MS.NoTrt_F |
| PRKDC    | 0.20232 | 0.39983 | 0.583 | 0.65 | 1 MS.Trt_vs_MS.NoTrt_F |
| SNRPB2   | 0.20353 | 0.77153 | 0.223 | 0.3  | 1 MS.Trt_vs_MS.NoTrt_F |
| BANK1    | 0.20369 | 0.82161 | 0.191 | 0.25 | 1 MS.Trt_vs_MS.NoTrt_F |
| NR1H2    | 0.20401 | 0.41605 | 0.507 | 0.61 | 1 MS.Trt_vs_MS.NoTrt_F |
| C15orf41 | 0.20422 | 0.76612 | 0.601 | 0.71 | 1 MS.Trt_vs_MS.NoTrt_F |
| KIAA1324 | 0.20457 | -0.6184 | 0.752 | 0.81 | 1 MS.Trt_vs_MS.NoTrt_F |
| C14orf80 | 0.20481 | 0.41375 | 0.284 | 0.35 | 1 MS.Trt_vs_MS.NoTrt_F |
| B3GAT3   | 0.20541 | 0.68232 | 0.543 | 0.6  | 1 MS.Trt_vs_MS.NoTrt_F |
| LGR4     | 0.20617 | -0.3432 | 0.104 | 0.14 | 1 MS.Trt_vs_MS.NoTrt_F |
| MT-ATP8  | 0.20653 | 0.26428 | 0.662 | 0.8  | 1 MS.Trt_vs_MS.NoTrt_F |
| RCC1L    | 0.20677 | -0.4259 | 0.299 | 0.35 | 1 MS.Trt_vs_MS.NoTrt_F |
| C14orf2  | 0.20678 | 0.3268  | 0.799 | 0.9  | 1 MS.Trt_vs_MS.NoTrt_F |
| CEP68    | 0.20697 | -0.2767 | 0.511 | 0.55 | 1 MS.Trt_vs_MS.NoTrt_F |
| ENY2     | 0.20726 | 0.58264 | 0.504 | 0.55 | 1 MS.Trt_vs_MS.NoTrt_F |
| GSTM2    | 0.20733 | 0.25764 | 0.356 | 0.43 | 1 MS.Trt_vs_MS.NoTrt_F |
| MFSD14C  | 0.20783 | -0.3414 | 0.615 | 0.73 | 1 MS.Trt_vs_MS.NoTrt_F |
| ZNF587B  | 0.2082  | 0.80093 | 0.309 | 0.38 | 1 MS.Trt_vs_MS.NoTrt_F |
| FAM96B   | 0.20824 | 0.46378 | 0.237 | 0.31 | 1 MS.Trt_vs_MS.NoTrt_F |
| SPDYE5   | 0.20844 | 0.30622 | 0.586 | 0.57 | 1 MS.Trt_vs_MS.NoTrt_F |
| TMEM94   | 0.20875 | 0.31115 | 0.216 | 0.28 | 1 MS.Trt_vs_MS.NoTrt_F |
| ZFYVE27  | 0.20875 | 0.5592  | 0.194 | 0.26 | 1 MS.Trt_vs_MS.NoTrt_F |
| SGPP2    | 0.20915 | 0.29316 | 0.342 | 0.41 | 1 MS.Trt_vs_MS.NoTrt_F |

|            |         |         |       |      |                        |
|------------|---------|---------|-------|------|------------------------|
| NTN5       | 0.20935 | 0.28745 | 0.14  | 0.19 | 1 MS.Trt_vs_MS.NoTrt_F |
| HVCN1      | 0.20967 | 0.36456 | 0.518 | 0.6  | 1 MS.Trt_vs_MS.NoTrt_F |
| ING1       | 0.20983 | 0.48075 | 0.597 | 0.63 | 1 MS.Trt_vs_MS.NoTrt_F |
| RBM7       | 0.21048 | 0.33304 | 0.759 | 0.68 | 1 MS.Trt_vs_MS.NoTrt_F |
| TCP11L1    | 0.21053 | -0.6584 | 0.234 | 0.28 | 1 MS.Trt_vs_MS.NoTrt_F |
| RRP1       | 0.21078 | 0.88123 | 0.647 | 0.71 | 1 MS.Trt_vs_MS.NoTrt_F |
| PIP5K1C    | 0.21091 | 0.77682 | 0.101 | 0.14 | 1 MS.Trt_vs_MS.NoTrt_F |
| IFITM3     | 0.211   | 0.28733 | 0.529 | 0.66 | 1 MS.Trt_vs_MS.NoTrt_F |
| RPS6KL1    | 0.21116 | -0.2516 | 0.655 | 0.76 | 1 MS.Trt_vs_MS.NoTrt_F |
| LIMA1      | 0.21182 | 0.44203 | 0.45  | 0.48 | 1 MS.Trt_vs_MS.NoTrt_F |
| POLR1D     | 0.21194 | 0.31972 | 0.464 | 0.53 | 1 MS.Trt_vs_MS.NoTrt_F |
| TCTEX1D2   | 0.21205 | 0.44081 | 0.335 | 0.39 | 1 MS.Trt_vs_MS.NoTrt_F |
| WASH1      | 0.2121  | 0.46532 | 0.216 | 0.28 | 1 MS.Trt_vs_MS.NoTrt_F |
| ZBTB2      | 0.21211 | 0.67319 | 0.126 | 0.18 | 1 MS.Trt_vs_MS.NoTrt_F |
| BCL11B     | 0.21258 | 0.46208 | 0.45  | 0.58 | 1 MS.Trt_vs_MS.NoTrt_F |
| PRDX3      | 0.21276 | 0.5055  | 0.457 | 0.53 | 1 MS.Trt_vs_MS.NoTrt_F |
| HIST2H2AA3 | 0.21303 | 0.69909 | 0.108 | 0.16 | 1 MS.Trt_vs_MS.NoTrt_F |
| PDPN       | 0.2134  | -0.5646 | 0.5   | 0.48 | 1 MS.Trt_vs_MS.NoTrt_F |
| SCRN2      | 0.21353 | 1.23285 | 0.133 | 0.18 | 1 MS.Trt_vs_MS.NoTrt_F |
| GUF1       | 0.2137  | 0.89487 | 0.371 | 0.45 | 1 MS.Trt_vs_MS.NoTrt_F |
| C3         | 0.21396 | 0.25843 | 0.924 | 0.93 | 1 MS.Trt_vs_MS.NoTrt_F |
| MPRIP      | 0.21429 | -0.4146 | 0.892 | 0.92 | 1 MS.Trt_vs_MS.NoTrt_F |
| CREBRF     | 0.21492 | 0.29515 | 0.687 | 0.81 | 1 MS.Trt_vs_MS.NoTrt_F |
| SUMF2      | 0.21505 | 0.59731 | 0.874 | 0.91 | 1 MS.Trt_vs_MS.NoTrt_F |
| GSK3A      | 0.21524 | -0.5247 | 0.324 | 0.37 | 1 MS.Trt_vs_MS.NoTrt_F |
| NBPF19     | 0.21552 | 0.44242 | 0.381 | 0.46 | 1 MS.Trt_vs_MS.NoTrt_F |
| ZNF324     | 0.21621 | 1.01256 | 0.101 | 0.14 | 1 MS.Trt_vs_MS.NoTrt_F |
| FASLG      | 0.21635 | 1.38779 | 0.104 | 0.14 | 1 MS.Trt_vs_MS.NoTrt_F |
| ANP32E     | 0.21715 | 1.09338 | 0.478 | 0.65 | 1 MS.Trt_vs_MS.NoTrt_F |
| TANGO2     | 0.21719 | 0.66851 | 0.871 | 0.87 | 1 MS.Trt_vs_MS.NoTrt_F |
| TBXAS1     | 0.21725 | 0.80846 | 0.392 | 0.46 | 1 MS.Trt_vs_MS.NoTrt_F |
| BAG2       | 0.21736 | 0.42355 | 0.245 | 0.29 | 1 MS.Trt_vs_MS.NoTrt_F |
| NCKAP1     | 0.21761 | 0.67588 | 0.68  | 0.65 | 1 MS.Trt_vs_MS.NoTrt_F |
| BICD2      | 0.21788 | 1.1372  | 0.119 | 0.17 | 1 MS.Trt_vs_MS.NoTrt_F |
| CARNS1     | 0.21799 | 0.75225 | 0.205 | 0.26 | 1 MS.Trt_vs_MS.NoTrt_F |
| CFAP20     | 0.21804 | 0.53785 | 0.183 | 0.24 | 1 MS.Trt_vs_MS.NoTrt_F |
| CLK2       | 0.21825 | 0.33349 | 0.122 | 0.17 | 1 MS.Trt_vs_MS.NoTrt_F |
| RFC4       | 0.21835 | 0.25084 | 0.309 | 0.37 | 1 MS.Trt_vs_MS.NoTrt_F |
| SYT2       | 0.21857 | 0.84633 | 0.072 | 0.11 | 1 MS.Trt_vs_MS.NoTrt_F |
| VPS50      | 0.21911 | -1.0123 | 0.604 | 0.64 | 1 MS.Trt_vs_MS.NoTrt_F |

|            |         |         |       |      |   |                      |
|------------|---------|---------|-------|------|---|----------------------|
| RBM34      | 0.21942 | 0.59427 | 0.619 | 0.72 | 1 | MS.Trt_vs_MS.NoTrt_F |
| C16orf72   | 0.21989 | 0.46532 | 0.86  | 0.85 | 1 | MS.Trt_vs_MS.NoTrt_F |
| PLEKHA5    | 0.22018 | -0.5271 | 0.917 | 0.95 | 1 | MS.Trt_vs_MS.NoTrt_F |
| YRDC       | 0.22035 | 0.54765 | 0.108 | 0.15 | 1 | MS.Trt_vs_MS.NoTrt_F |
| MXRA7      | 0.22038 | -0.3072 | 0.755 | 0.84 | 1 | MS.Trt_vs_MS.NoTrt_F |
| SH2B3      | 0.2206  | 0.30823 | 0.187 | 0.24 | 1 | MS.Trt_vs_MS.NoTrt_F |
| PRKD2      | 0.22069 | 0.81839 | 0.748 | 0.79 | 1 | MS.Trt_vs_MS.NoTrt_F |
| ATP1B1     | 0.22134 | 0.85051 | 0.309 | 0.39 | 1 | MS.Trt_vs_MS.NoTrt_F |
| ARHGAP8    | 0.22136 | 0.25439 | 0.683 | 0.72 | 1 | MS.Trt_vs_MS.NoTrt_F |
| TRPM7      | 0.22147 | 0.30474 | 0.906 | 0.94 | 1 | MS.Trt_vs_MS.NoTrt_F |
| RP11-514P8 | 0.2215  | -0.3996 | 0.072 | 0.11 | 1 | MS.Trt_vs_MS.NoTrt_F |
| RNF103     | 0.22158 | 0.44697 | 0.626 | 0.67 | 1 | MS.Trt_vs_MS.NoTrt_F |
| THOC3      | 0.22179 | 0.2747  | 0.532 | 0.65 | 1 | MS.Trt_vs_MS.NoTrt_F |
| NR2C1      | 0.22269 | 0.52493 | 0.658 | 0.76 | 1 | MS.Trt_vs_MS.NoTrt_F |
| BBS1       | 0.22288 | 0.25619 | 0.608 | 0.67 | 1 | MS.Trt_vs_MS.NoTrt_F |
| HLA-DRB3   | 0.22316 | 0.84042 | 0.18  | 0.24 | 1 | MS.Trt_vs_MS.NoTrt_F |
| CTD-2132N1 | 0.2239  | 0.58069 | 0.097 | 0.14 | 1 | MS.Trt_vs_MS.NoTrt_F |
| MCF2L      | 0.22398 | -0.5688 | 0.295 | 0.35 | 1 | MS.Trt_vs_MS.NoTrt_F |
| CPNE1      | 0.22448 | 0.43377 | 0.522 | 0.69 | 1 | MS.Trt_vs_MS.NoTrt_F |
| EID2B      | 0.22456 | 0.62854 | 0.514 | 0.57 | 1 | MS.Trt_vs_MS.NoTrt_F |
| USP12      | 0.22513 | 0.70899 | 0.115 | 0.16 | 1 | MS.Trt_vs_MS.NoTrt_F |
| TMEM41A    | 0.22514 | 0.31682 | 0.799 | 0.79 | 1 | MS.Trt_vs_MS.NoTrt_F |
| G6PD       | 0.22522 | 0.37564 | 0.115 | 0.16 | 1 | MS.Trt_vs_MS.NoTrt_F |
| BCL2L13    | 0.22538 | -0.8568 | 0.514 | 0.6  | 1 | MS.Trt_vs_MS.NoTrt_F |
| UVSSA      | 0.22611 | -0.4903 | 0.741 | 0.81 | 1 | MS.Trt_vs_MS.NoTrt_F |
| TMEM127    | 0.22631 | 0.32599 | 0.687 | 0.71 | 1 | MS.Trt_vs_MS.NoTrt_F |
| ZNF563     | 0.22648 | 1.35616 | 0.55  | 0.62 | 1 | MS.Trt_vs_MS.NoTrt_F |
| ITGAX      | 0.22663 | 0.35315 | 0.482 | 0.56 | 1 | MS.Trt_vs_MS.NoTrt_F |
| TEX2       | 0.2274  | 0.42438 | 0.633 | 0.73 | 1 | MS.Trt_vs_MS.NoTrt_F |
| TADA2B     | 0.22758 | 1.07613 | 0.302 | 0.36 | 1 | MS.Trt_vs_MS.NoTrt_F |
| PZP        | 0.22771 | 0.52611 | 0.083 | 0.12 | 1 | MS.Trt_vs_MS.NoTrt_F |
| HBA2       | 0.22807 | 0.65375 | 0.072 | 0.11 | 1 | MS.Trt_vs_MS.NoTrt_F |
| ZNF234     | 0.22834 | 0.69176 | 0.709 | 0.79 | 1 | MS.Trt_vs_MS.NoTrt_F |
| RRP12      | 0.22851 | 0.2918  | 0.906 | 0.87 | 1 | MS.Trt_vs_MS.NoTrt_F |
| UBE2V2     | 0.22854 | 0.38063 | 0.683 | 0.77 | 1 | MS.Trt_vs_MS.NoTrt_F |
| ERCC2      | 0.22917 | -0.7125 | 0.522 | 0.59 | 1 | MS.Trt_vs_MS.NoTrt_F |
| RGS5       | 0.2292  | 1.42784 | 0.104 | 0.14 | 1 | MS.Trt_vs_MS.NoTrt_F |
| IFT88      | 0.22921 | 0.9138  | 0.496 | 0.58 | 1 | MS.Trt_vs_MS.NoTrt_F |
| SLC38A10   | 0.22953 | 0.3674  | 0.388 | 0.43 | 1 | MS.Trt_vs_MS.NoTrt_F |
| XKR8       | 0.23012 | -0.3501 | 0.194 | 0.24 | 1 | MS.Trt_vs_MS.NoTrt_F |

|            |         |         |       |      |   |                      |
|------------|---------|---------|-------|------|---|----------------------|
| STXBP5     | 0.23015 | 0.9034  | 0.176 | 0.23 | 1 | MS.Trt_vs_MS.NoTrt_F |
| RP11-343C2 | 0.23024 | 0.49745 | 0.072 | 0.11 | 1 | MS.Trt_vs_MS.NoTrt_F |
| NFE2L1     | 0.23045 | -0.3252 | 0.112 | 0.16 | 1 | MS.Trt_vs_MS.NoTrt_F |
| GPAT4      | 0.23057 | -0.611  | 0.73  | 0.85 | 1 | MS.Trt_vs_MS.NoTrt_F |
| LY6E       | 0.23062 | 0.31842 | 0.522 | 0.63 | 1 | MS.Trt_vs_MS.NoTrt_F |
| IL17RE     | 0.23069 | 0.81992 | 0.263 | 0.33 | 1 | MS.Trt_vs_MS.NoTrt_F |
| PPP2R5C    | 0.23087 | 0.7143  | 0.924 | 0.96 | 1 | MS.Trt_vs_MS.NoTrt_F |
| DERA       | 0.23108 | 1.63403 | 0.112 | 0.16 | 1 | MS.Trt_vs_MS.NoTrt_F |
| CEP120     | 0.23111 | 0.63731 | 0.165 | 0.22 | 1 | MS.Trt_vs_MS.NoTrt_F |
| PPIL3      | 0.2315  | 0.57739 | 0.734 | 0.85 | 1 | MS.Trt_vs_MS.NoTrt_F |
| NQO2       | 0.23158 | -0.2569 | 0.763 | 0.8  | 1 | MS.Trt_vs_MS.NoTrt_F |
| TRAF3IP1   | 0.23179 | 0.29647 | 0.349 | 0.4  | 1 | MS.Trt_vs_MS.NoTrt_F |
| IGF1R      | 0.2326  | 1.47779 | 0.288 | 0.37 | 1 | MS.Trt_vs_MS.NoTrt_F |
| ORC5       | 0.23416 | 0.38109 | 0.263 | 0.34 | 1 | MS.Trt_vs_MS.NoTrt_F |
| ZBP1       | 0.23435 | 0.2816  | 0.547 | 0.61 | 1 | MS.Trt_vs_MS.NoTrt_F |
| NDUFA12    | 0.23442 | 0.85871 | 0.241 | 0.32 | 1 | MS.Trt_vs_MS.NoTrt_F |
| TUFT1      | 0.23469 | -0.3751 | 0.367 | 0.44 | 1 | MS.Trt_vs_MS.NoTrt_F |
| FSCN1      | 0.23494 | 0.616   | 0.094 | 0.13 | 1 | MS.Trt_vs_MS.NoTrt_F |
| ATAD3C     | 0.23517 | 0.386   | 0.856 | 0.77 | 1 | MS.Trt_vs_MS.NoTrt_F |
| ZFP41      | 0.23522 | 0.8769  | 0.147 | 0.19 | 1 | MS.Trt_vs_MS.NoTrt_F |
| GPR155     | 0.23525 | -0.6452 | 0.899 | 0.91 | 1 | MS.Trt_vs_MS.NoTrt_F |
| OGFOD1     | 0.23546 | -0.2743 | 0.64  | 0.69 | 1 | MS.Trt_vs_MS.NoTrt_F |
| LMBR1      | 0.23568 | 0.68913 | 0.46  | 0.54 | 1 | MS.Trt_vs_MS.NoTrt_F |
| MATN1      | 0.23574 | 1.00125 | 0.09  | 0.13 | 1 | MS.Trt_vs_MS.NoTrt_F |
| UBOX5      | 0.23581 | -0.338  | 0.637 | 0.66 | 1 | MS.Trt_vs_MS.NoTrt_F |
| SPATA6     | 0.23586 | 0.3474  | 0.133 | 0.18 | 1 | MS.Trt_vs_MS.NoTrt_F |
| PEX11A     | 0.23604 | 0.41771 | 0.565 | 0.61 | 1 | MS.Trt_vs_MS.NoTrt_F |
| LIPE       | 0.23618 | 1.5981  | 0.342 | 0.44 | 1 | MS.Trt_vs_MS.NoTrt_F |
| SNX11      | 0.23631 | 0.35699 | 0.601 | 0.67 | 1 | MS.Trt_vs_MS.NoTrt_F |
| TRAF2      | 0.23638 | 0.32251 | 0.255 | 0.33 | 1 | MS.Trt_vs_MS.NoTrt_F |
| ISY1       | 0.23675 | 0.56629 | 0.597 | 0.69 | 1 | MS.Trt_vs_MS.NoTrt_F |
| POMZP3     | 0.23696 | 0.75178 | 0.439 | 0.54 | 1 | MS.Trt_vs_MS.NoTrt_F |
| CIPC       | 0.23717 | 0.37484 | 0.45  | 0.5  | 1 | MS.Trt_vs_MS.NoTrt_F |
| AP5M1      | 0.23731 | 0.28953 | 0.176 | 0.23 | 1 | MS.Trt_vs_MS.NoTrt_F |
| DNPEP      | 0.23765 | -0.9829 | 0.489 | 0.52 | 1 | MS.Trt_vs_MS.NoTrt_F |
| TAOK1      | 0.23795 | 0.4568  | 0.928 | 0.95 | 1 | MS.Trt_vs_MS.NoTrt_F |
| LRRN3      | 0.23816 | 1.30989 | 0.137 | 0.18 | 1 | MS.Trt_vs_MS.NoTrt_F |
| SPRYD7     | 0.23831 | 0.26402 | 0.691 | 0.69 | 1 | MS.Trt_vs_MS.NoTrt_F |
| PPP1R3B    | 0.23849 | 0.90834 | 0.277 | 0.34 | 1 | MS.Trt_vs_MS.NoTrt_F |
| SLC16A7    | 0.23853 | -0.6383 | 0.608 | 0.66 | 1 | MS.Trt_vs_MS.NoTrt_F |

|           |         |         |       |      |                        |
|-----------|---------|---------|-------|------|------------------------|
| CLUAP1    | 0.23883 | 0.26741 | 0.817 | 0.79 | 1 MS.Trt_vs_MS.NoTrt_F |
| ATP6AP2   | 0.23891 | 0.37417 | 0.813 | 0.87 | 1 MS.Trt_vs_MS.NoTrt_F |
| ALMS1     | 0.2394  | -0.5443 | 0.446 | 0.48 | 1 MS.Trt_vs_MS.NoTrt_F |
| HIP1      | 0.23986 | 0.37125 | 0.655 | 0.69 | 1 MS.Trt_vs_MS.NoTrt_F |
| C16orf74  | 0.24014 | -0.3342 | 0.245 | 0.29 | 1 MS.Trt_vs_MS.NoTrt_F |
| ATP13A4   | 0.24032 | -0.3105 | 0.424 | 0.48 | 1 MS.Trt_vs_MS.NoTrt_F |
| MR1       | 0.24039 | -0.3061 | 0.896 | 0.91 | 1 MS.Trt_vs_MS.NoTrt_F |
| RPP14     | 0.24045 | 0.50509 | 0.914 | 0.93 | 1 MS.Trt_vs_MS.NoTrt_F |
| CCDC92    | 0.24057 | 0.61623 | 0.09  | 0.13 | 1 MS.Trt_vs_MS.NoTrt_F |
| SH2D3A    | 0.24062 | -0.2544 | 0.95  | 0.98 | 1 MS.Trt_vs_MS.NoTrt_F |
| KIAA1429  | 0.24092 | 0.43045 | 0.835 | 0.88 | 1 MS.Trt_vs_MS.NoTrt_F |
| CCDC34    | 0.24094 | 0.42488 | 0.137 | 0.18 | 1 MS.Trt_vs_MS.NoTrt_F |
| HIST1H2BG | 0.24111 | 0.28526 | 0.486 | 0.43 | 1 MS.Trt_vs_MS.NoTrt_F |
| LCLAT1    | 0.24114 | 0.61921 | 0.799 | 0.85 | 1 MS.Trt_vs_MS.NoTrt_F |
| NQO1      | 0.24126 | 0.5621  | 0.579 | 0.64 | 1 MS.Trt_vs_MS.NoTrt_F |
| CUBN      | 0.24155 | -0.6881 | 0.392 | 0.44 | 1 MS.Trt_vs_MS.NoTrt_F |
| BORCS7    | 0.24178 | -0.6479 | 0.331 | 0.39 | 1 MS.Trt_vs_MS.NoTrt_F |
| ACRC      | 0.24179 | 0.26985 | 0.439 | 0.49 | 1 MS.Trt_vs_MS.NoTrt_F |
| ZNF623    | 0.24197 | 0.46805 | 0.629 | 0.72 | 1 MS.Trt_vs_MS.NoTrt_F |
| ADSSL1    | 0.24219 | 0.39327 | 0.324 | 0.39 | 1 MS.Trt_vs_MS.NoTrt_F |
| SHKBP1    | 0.24242 | 0.25822 | 0.734 | 0.83 | 1 MS.Trt_vs_MS.NoTrt_F |
| ZNF680    | 0.24248 | 1.21632 | 0.173 | 0.22 | 1 MS.Trt_vs_MS.NoTrt_F |
| UQCRH     | 0.24268 | 0.48138 | 0.486 | 0.59 | 1 MS.Trt_vs_MS.NoTrt_F |
| SLC16A5   | 0.24287 | 0.69502 | 0.176 | 0.23 | 1 MS.Trt_vs_MS.NoTrt_F |
| C9orf64   | 0.24287 | -0.3668 | 0.583 | 0.62 | 1 MS.Trt_vs_MS.NoTrt_F |
| ATP7A     | 0.24305 | 0.76173 | 0.399 | 0.45 | 1 MS.Trt_vs_MS.NoTrt_F |
| C9orf3    | 0.24307 | 0.39278 | 0.698 | 0.79 | 1 MS.Trt_vs_MS.NoTrt_F |
| C9orf85   | 0.24333 | 0.28034 | 0.903 | 0.93 | 1 MS.Trt_vs_MS.NoTrt_F |
| PRF1      | 0.24336 | 0.48955 | 0.263 | 0.33 | 1 MS.Trt_vs_MS.NoTrt_F |
| TYRO3     | 0.24389 | 0.27308 | 0.968 | 0.96 | 1 MS.Trt_vs_MS.NoTrt_F |
| HIST1H1E  | 0.24424 | 1.51712 | 0.115 | 0.16 | 1 MS.Trt_vs_MS.NoTrt_F |
| ALG10B    | 0.2444  | -0.3627 | 0.748 | 0.67 | 1 MS.Trt_vs_MS.NoTrt_F |
| FHDC1     | 0.24477 | 0.70678 | 0.486 | 0.49 | 1 MS.Trt_vs_MS.NoTrt_F |
| POU2AF1   | 0.24498 | 0.43547 | 0.705 | 0.73 | 1 MS.Trt_vs_MS.NoTrt_F |
| ZNF844    | 0.24526 | 0.27652 | 0.924 | 0.92 | 1 MS.Trt_vs_MS.NoTrt_F |
| EXOSC9    | 0.2453  | 0.45637 | 0.227 | 0.28 | 1 MS.Trt_vs_MS.NoTrt_F |
| STX7      | 0.24543 | 0.59769 | 0.719 | 0.76 | 1 MS.Trt_vs_MS.NoTrt_F |
| ZNF532    | 0.24568 | -0.5676 | 0.935 | 0.97 | 1 MS.Trt_vs_MS.NoTrt_F |
| ZNF77     | 0.24587 | -1.4561 | 0.083 | 0.12 | 1 MS.Trt_vs_MS.NoTrt_F |
| CCDC159   | 0.24619 | -0.6019 | 0.759 | 0.79 | 1 MS.Trt_vs_MS.NoTrt_F |

|            |         |         |       |      |                        |
|------------|---------|---------|-------|------|------------------------|
| IGHMBP2    | 0.24666 | 1.26065 | 0.392 | 0.43 | 1 MS.Trt_vs_MS.NoTrt_F |
| SGSM1      | 0.24671 | -0.437  | 0.558 | 0.58 | 1 MS.Trt_vs_MS.NoTrt_F |
| ISPD       | 0.24673 | 0.3282  | 0.791 | 0.82 | 1 MS.Trt_vs_MS.NoTrt_F |
| DHCR7      | 0.24677 | 1.14586 | 0.094 | 0.13 | 1 MS.Trt_vs_MS.NoTrt_F |
| CD38       | 0.2472  | -0.6029 | 0.356 | 0.41 | 1 MS.Trt_vs_MS.NoTrt_F |
| BAIAP2L1   | 0.24754 | 0.42608 | 0.525 | 0.57 | 1 MS.Trt_vs_MS.NoTrt_F |
| GOLGA6L1   | 0.24766 | 0.3826  | 0.457 | 0.43 | 1 MS.Trt_vs_MS.NoTrt_F |
| THAP12     | 0.24771 | -0.5637 | 0.604 | 0.66 | 1 MS.Trt_vs_MS.NoTrt_F |
| PNPT1      | 0.24822 | 0.5662  | 0.881 | 0.92 | 1 MS.Trt_vs_MS.NoTrt_F |
| P3H3       | 0.24835 | 0.36764 | 0.079 | 0.11 | 1 MS.Trt_vs_MS.NoTrt_F |
| PROSC      | 0.24859 | 0.3505  | 0.392 | 0.44 | 1 MS.Trt_vs_MS.NoTrt_F |
| RRBP1      | 0.24872 | -0.7123 | 0.32  | 0.39 | 1 MS.Trt_vs_MS.NoTrt_F |
| B4GALNT2   | 0.2488  | 0.46141 | 0.353 | 0.44 | 1 MS.Trt_vs_MS.NoTrt_F |
| TTI2       | 0.24885 | -0.3991 | 0.399 | 0.48 | 1 MS.Trt_vs_MS.NoTrt_F |
| USP53      | 0.24902 | 0.52392 | 0.565 | 0.66 | 1 MS.Trt_vs_MS.NoTrt_F |
| QPRT       | 0.24919 | 0.3534  | 0.903 | 0.88 | 1 MS.Trt_vs_MS.NoTrt_F |
| NAPB       | 0.24938 | 0.89008 | 0.439 | 0.51 | 1 MS.Trt_vs_MS.NoTrt_F |
| ZBED6CL    | 0.24942 | 2.13484 | 0.094 | 0.13 | 1 MS.Trt_vs_MS.NoTrt_F |
| PPARD      | 0.2495  | -0.4399 | 0.561 | 0.65 | 1 MS.Trt_vs_MS.NoTrt_F |
| ITM2B      | 0.24961 | 0.39363 | 0.604 | 0.77 | 1 MS.Trt_vs_MS.NoTrt_F |
| GRPEL1     | 0.24965 | 0.71833 | 0.18  | 0.24 | 1 MS.Trt_vs_MS.NoTrt_F |
| NTAN1      | 0.24979 | 0.26016 | 0.662 | 0.77 | 1 MS.Trt_vs_MS.NoTrt_F |
| SDK2       | 0.2506  | 0.25212 | 0.54  | 0.62 | 1 MS.Trt_vs_MS.NoTrt_F |
| RP11-793H1 | 0.25079 | 0.45667 | 0.317 | 0.37 | 1 MS.Trt_vs_MS.NoTrt_F |
| PRPSAP1    | 0.25138 | 0.41464 | 0.77  | 0.75 | 1 MS.Trt_vs_MS.NoTrt_F |
| RPL26L1    | 0.25151 | 0.43701 | 0.165 | 0.21 | 1 MS.Trt_vs_MS.NoTrt_F |
| IL11RA     | 0.25164 | 0.25107 | 0.183 | 0.24 | 1 MS.Trt_vs_MS.NoTrt_F |
| CIITA      | 0.25185 | 0.33784 | 0.91  | 0.9  | 1 MS.Trt_vs_MS.NoTrt_F |
| CLCN3      | 0.25212 | -0.3013 | 0.396 | 0.44 | 1 MS.Trt_vs_MS.NoTrt_F |
| BEND7      | 0.25215 | 0.4704  | 0.363 | 0.43 | 1 MS.Trt_vs_MS.NoTrt_F |
| 9-Mar      | 0.25284 | -0.7553 | 0.59  | 0.63 | 1 MS.Trt_vs_MS.NoTrt_F |
| UAP1       | 0.25306 | 1.34528 | 0.108 | 0.15 | 1 MS.Trt_vs_MS.NoTrt_F |
| ZNF417     | 0.25331 | 0.68555 | 0.763 | 0.75 | 1 MS.Trt_vs_MS.NoTrt_F |
| PIGS       | 0.25383 | 0.49835 | 0.532 | 0.57 | 1 MS.Trt_vs_MS.NoTrt_F |
| KIAA1456   | 0.25384 | 0.35888 | 0.914 | 0.93 | 1 MS.Trt_vs_MS.NoTrt_F |
| SUOX       | 0.25391 | -0.5629 | 0.781 | 0.84 | 1 MS.Trt_vs_MS.NoTrt_F |
| PTPN18     | 0.25399 | 0.28581 | 0.406 | 0.48 | 1 MS.Trt_vs_MS.NoTrt_F |
| ERC1       | 0.25404 | -0.4327 | 0.892 | 0.92 | 1 MS.Trt_vs_MS.NoTrt_F |
| AARD       | 0.25412 | 0.31275 | 0.755 | 0.7  | 1 MS.Trt_vs_MS.NoTrt_F |
| ADCY2      | 0.25418 | 0.2833  | 0.727 | 0.8  | 1 MS.Trt_vs_MS.NoTrt_F |

|         |         |         |       |      |                        |
|---------|---------|---------|-------|------|------------------------|
| CDKL5   | 0.25422 | 0.29902 | 0.939 | 0.93 | 1 MS.Trt_vs_MS.NoTrt_F |
| CNOT7   | 0.25454 | 0.49244 | 0.543 | 0.62 | 1 MS.Trt_vs_MS.NoTrt_F |
| CLCN2   | 0.25477 | 0.50497 | 0.626 | 0.65 | 1 MS.Trt_vs_MS.NoTrt_F |
| MIF     | 0.25491 | 0.73241 | 0.46  | 0.64 | 1 MS.Trt_vs_MS.NoTrt_F |
| RNF169  | 0.25525 | 1.09603 | 0.104 | 0.14 | 1 MS.Trt_vs_MS.NoTrt_F |
| RHBDD3  | 0.25552 | -0.8155 | 0.554 | 0.58 | 1 MS.Trt_vs_MS.NoTrt_F |
| RBM33   | 0.25555 | 0.65972 | 0.255 | 0.33 | 1 MS.Trt_vs_MS.NoTrt_F |
| CD300LD | 0.25556 | 1.35939 | 0.392 | 0.46 | 1 MS.Trt_vs_MS.NoTrt_F |
| ZNF699  | 0.2557  | -0.5198 | 0.306 | 0.36 | 1 MS.Trt_vs_MS.NoTrt_F |
| ZSWIM8  | 0.25584 | 0.46405 | 0.831 | 0.86 | 1 MS.Trt_vs_MS.NoTrt_F |
| MMP25   | 0.25615 | 0.59213 | 0.158 | 0.21 | 1 MS.Trt_vs_MS.NoTrt_F |
| LGALS4  | 0.25628 | 0.36476 | 0.572 | 0.64 | 1 MS.Trt_vs_MS.NoTrt_F |
| RRP15   | 0.25642 | 0.54735 | 0.532 | 0.58 | 1 MS.Trt_vs_MS.NoTrt_F |
| LANCL3  | 0.25703 | 1.01638 | 0.309 | 0.35 | 1 MS.Trt_vs_MS.NoTrt_F |
| ZNF749  | 0.25786 | 0.80897 | 0.46  | 0.41 | 1 MS.Trt_vs_MS.NoTrt_F |
| LGR6    | 0.25798 | 1.16056 | 0.137 | 0.18 | 1 MS.Trt_vs_MS.NoTrt_F |
| CTDSPL2 | 0.25805 | -0.6771 | 0.68  | 0.76 | 1 MS.Trt_vs_MS.NoTrt_F |
| DKC1    | 0.25818 | 0.4248  | 0.385 | 0.42 | 1 MS.Trt_vs_MS.NoTrt_F |
| SFT2D3  | 0.25848 | 0.77553 | 0.45  | 0.53 | 1 MS.Trt_vs_MS.NoTrt_F |
| RBP1    | 0.25865 | 0.36048 | 0.399 | 0.48 | 1 MS.Trt_vs_MS.NoTrt_F |
| SH3BGR3 | 0.25879 | 0.26249 | 0.853 | 0.97 | 1 MS.Trt_vs_MS.NoTrt_F |
| IRAK3   | 0.25921 | -0.3553 | 0.396 | 0.48 | 1 MS.Trt_vs_MS.NoTrt_F |
| MT-ND1  | 0.25927 | 0.43734 | 0.878 | 0.94 | 1 MS.Trt_vs_MS.NoTrt_F |
| HYPK    | 0.26014 | -0.4148 | 0.896 | 0.95 | 1 MS.Trt_vs_MS.NoTrt_F |
| MKNK1   | 0.26043 | 0.46334 | 0.917 | 0.93 | 1 MS.Trt_vs_MS.NoTrt_F |
| ABL2    | 0.26055 | -0.5022 | 0.73  | 0.81 | 1 MS.Trt_vs_MS.NoTrt_F |
| CLCN6   | 0.26059 | 0.93769 | 0.532 | 0.53 | 1 MS.Trt_vs_MS.NoTrt_F |
| UROS    | 0.26113 | -0.3987 | 0.446 | 0.5  | 1 MS.Trt_vs_MS.NoTrt_F |
| CCDC25  | 0.26121 | 1.02098 | 0.309 | 0.37 | 1 MS.Trt_vs_MS.NoTrt_F |
| ESRP2   | 0.26123 | 0.30412 | 0.094 | 0.13 | 1 MS.Trt_vs_MS.NoTrt_F |
| KANSL3  | 0.26127 | -0.3359 | 0.932 | 0.97 | 1 MS.Trt_vs_MS.NoTrt_F |
| EFCAB10 | 0.2613  | -0.3274 | 0.201 | 0.24 | 1 MS.Trt_vs_MS.NoTrt_F |
| P2RY11  | 0.26154 | 0.5214  | 0.147 | 0.19 | 1 MS.Trt_vs_MS.NoTrt_F |
| FAM134A | 0.26182 | 0.80883 | 0.421 | 0.5  | 1 MS.Trt_vs_MS.NoTrt_F |
| RIMKLB  | 0.26186 | 1.2715  | 0.119 | 0.16 | 1 MS.Trt_vs_MS.NoTrt_F |
| ZNF273  | 0.26204 | 0.38973 | 0.892 | 0.9  | 1 MS.Trt_vs_MS.NoTrt_F |
| CBX5    | 0.26215 | 0.34954 | 0.928 | 0.93 | 1 MS.Trt_vs_MS.NoTrt_F |
| RCOR1   | 0.26267 | 0.36084 | 0.169 | 0.22 | 1 MS.Trt_vs_MS.NoTrt_F |
| OSBPL2  | 0.26273 | -0.6177 | 0.486 | 0.55 | 1 MS.Trt_vs_MS.NoTrt_F |
| LRRC8B  | 0.26371 | 0.55563 | 0.421 | 0.48 | 1 MS.Trt_vs_MS.NoTrt_F |



|           |         |         |       |      |                        |
|-----------|---------|---------|-------|------|------------------------|
| ATP7B     | 0.26372 | 1.1477  | 0.191 | 0.24 | 1 MS.Trt_vs_MS.NoTrt_F |
| CALM1     | 0.26389 | 0.393   | 0.799 | 0.91 | 1 MS.Trt_vs_MS.NoTrt_F |
| VSIG1     | 0.26399 | 0.32559 | 0.55  | 0.65 | 1 MS.Trt_vs_MS.NoTrt_F |
| AGAP3     | 0.264   | 0.6752  | 0.079 | 0.11 | 1 MS.Trt_vs_MS.NoTrt_F |
| ZSCAN2    | 0.26422 | -0.6249 | 0.763 | 0.83 | 1 MS.Trt_vs_MS.NoTrt_F |
| TCF7      | 0.26465 | 0.83504 | 0.766 | 0.76 | 1 MS.Trt_vs_MS.NoTrt_F |
| NOP2      | 0.26504 | -0.4428 | 0.403 | 0.45 | 1 MS.Trt_vs_MS.NoTrt_F |
| DIAPH3    | 0.26521 | 0.28257 | 0.403 | 0.38 | 1 MS.Trt_vs_MS.NoTrt_F |
| MAPK1     | 0.26577 | 0.57821 | 0.54  | 0.64 | 1 MS.Trt_vs_MS.NoTrt_F |
| CD8B      | 0.26585 | 1.38308 | 0.115 | 0.16 | 1 MS.Trt_vs_MS.NoTrt_F |
| MTO1      | 0.26611 | 0.26282 | 0.978 | 0.98 | 1 MS.Trt_vs_MS.NoTrt_F |
| EIF1AD    | 0.26675 | 0.77088 | 0.734 | 0.73 | 1 MS.Trt_vs_MS.NoTrt_F |
| ASAH1     | 0.2669  | 0.32412 | 0.734 | 0.78 | 1 MS.Trt_vs_MS.NoTrt_F |
| TM2D1     | 0.26729 | 0.53095 | 0.885 | 0.92 | 1 MS.Trt_vs_MS.NoTrt_F |
| ACBD5     | 0.26762 | -0.2862 | 0.5   | 0.54 | 1 MS.Trt_vs_MS.NoTrt_F |
| MAB21L3   | 0.26785 | 0.47203 | 0.327 | 0.4  | 1 MS.Trt_vs_MS.NoTrt_F |
| EFHD1     | 0.26786 | -0.5149 | 0.281 | 0.34 | 1 MS.Trt_vs_MS.NoTrt_F |
| RAB11FIP3 | 0.26835 | 0.58599 | 0.205 | 0.26 | 1 MS.Trt_vs_MS.NoTrt_F |
| LMAN1     | 0.26871 | 0.37091 | 0.209 | 0.27 | 1 MS.Trt_vs_MS.NoTrt_F |
| SIRPB1    | 0.26886 | 0.73309 | 0.248 | 0.31 | 1 MS.Trt_vs_MS.NoTrt_F |
| MYOM1     | 0.26896 | -0.4099 | 0.335 | 0.39 | 1 MS.Trt_vs_MS.NoTrt_F |
| KCNN3     | 0.26913 | 0.51575 | 0.504 | 0.45 | 1 MS.Trt_vs_MS.NoTrt_F |
| UBE3C     | 0.26926 | 0.69496 | 0.576 | 0.66 | 1 MS.Trt_vs_MS.NoTrt_F |
| TMSB15B   | 0.2694  | -0.6758 | 0.299 | 0.34 | 1 MS.Trt_vs_MS.NoTrt_F |
| LATS1     | 0.2697  | 0.27192 | 0.665 | 0.72 | 1 MS.Trt_vs_MS.NoTrt_F |
| SDC4      | 0.2699  | 1.20399 | 0.162 | 0.21 | 1 MS.Trt_vs_MS.NoTrt_F |
| DEF8      | 0.27012 | 0.44453 | 0.46  | 0.53 | 1 MS.Trt_vs_MS.NoTrt_F |
| TOMM70    | 0.27018 | 1.5151  | 0.176 | 0.22 | 1 MS.Trt_vs_MS.NoTrt_F |
| ZFP36L2   | 0.27099 | 0.65322 | 0.493 | 0.64 | 1 MS.Trt_vs_MS.NoTrt_F |
| CBWD1     | 0.27108 | 0.55123 | 0.665 | 0.74 | 1 MS.Trt_vs_MS.NoTrt_F |
| MCTP1     | 0.27128 | 0.82851 | 0.083 | 0.12 | 1 MS.Trt_vs_MS.NoTrt_F |
| LPCAT3    | 0.27133 | 0.36082 | 0.442 | 0.51 | 1 MS.Trt_vs_MS.NoTrt_F |
| NFIB      | 0.27149 | 1.95964 | 0.137 | 0.18 | 1 MS.Trt_vs_MS.NoTrt_F |
| TSTD2     | 0.27153 | 0.80189 | 0.126 | 0.17 | 1 MS.Trt_vs_MS.NoTrt_F |
| ZNF584    | 0.27156 | -0.4661 | 0.687 | 0.75 | 1 MS.Trt_vs_MS.NoTrt_F |
| ASCC1     | 0.27167 | -0.3686 | 0.612 | 0.73 | 1 MS.Trt_vs_MS.NoTrt_F |
| ALDH5A1   | 0.27216 | -0.2901 | 0.482 | 0.57 | 1 MS.Trt_vs_MS.NoTrt_F |
| BPHL      | 0.27217 | 0.73408 | 0.633 | 0.75 | 1 MS.Trt_vs_MS.NoTrt_F |
| BEAN1     | 0.2723  | 0.29392 | 0.489 | 0.55 | 1 MS.Trt_vs_MS.NoTrt_F |
| TNFRSF11A | 0.27249 | -0.2688 | 0.281 | 0.24 | 1 MS.Trt_vs_MS.NoTrt_F |

|           |         |         |       |      |                        |
|-----------|---------|---------|-------|------|------------------------|
| G6PC3     | 0.27265 | 0.46781 | 0.856 | 0.83 | 1 MS.Trt_vs_MS.NoTrt_F |
| DPP6      | 0.27277 | 0.60019 | 0.514 | 0.53 | 1 MS.Trt_vs_MS.NoTrt_F |
| PLCD4     | 0.27315 | -0.3938 | 0.295 | 0.35 | 1 MS.Trt_vs_MS.NoTrt_F |
| PSMG3     | 0.27316 | 0.92    | 0.594 | 0.7  | 1 MS.Trt_vs_MS.NoTrt_F |
| PBRM1     | 0.27378 | 0.63126 | 0.683 | 0.79 | 1 MS.Trt_vs_MS.NoTrt_F |
| ZNF98     | 0.27412 | -0.275  | 0.115 | 0.08 | 1 MS.Trt_vs_MS.NoTrt_F |
| HSD17B12  | 0.27416 | -0.3307 | 0.457 | 0.52 | 1 MS.Trt_vs_MS.NoTrt_F |
| ATAD1     | 0.27419 | 0.56408 | 0.176 | 0.23 | 1 MS.Trt_vs_MS.NoTrt_F |
| PSMB9     | 0.27425 | 0.49536 | 0.748 | 0.8  | 1 MS.Trt_vs_MS.NoTrt_F |
| TALDO1    | 0.2744  | 0.49538 | 0.669 | 0.76 | 1 MS.Trt_vs_MS.NoTrt_F |
| WDR92     | 0.27457 | -0.4433 | 0.705 | 0.73 | 1 MS.Trt_vs_MS.NoTrt_F |
| GABPB2    | 0.2746  | 0.51054 | 0.982 | 0.99 | 1 MS.Trt_vs_MS.NoTrt_F |
| AAED1     | 0.27498 | 0.71007 | 0.777 | 0.83 | 1 MS.Trt_vs_MS.NoTrt_F |
| ARHGAP27  | 0.27592 | 0.257   | 0.543 | 0.61 | 1 MS.Trt_vs_MS.NoTrt_F |
| DCAKD     | 0.27641 | 0.6703  | 0.374 | 0.44 | 1 MS.Trt_vs_MS.NoTrt_F |
| CCND3     | 0.27688 | 0.45496 | 0.54  | 0.64 | 1 MS.Trt_vs_MS.NoTrt_F |
| CHP2      | 0.27713 | 0.33258 | 0.406 | 0.53 | 1 MS.Trt_vs_MS.NoTrt_F |
| TTC28     | 0.27721 | 0.46608 | 0.378 | 0.44 | 1 MS.Trt_vs_MS.NoTrt_F |
| LRCH1     | 0.27771 | 0.74148 | 0.112 | 0.15 | 1 MS.Trt_vs_MS.NoTrt_F |
| SAR1A     | 0.27796 | 0.35148 | 0.745 | 0.74 | 1 MS.Trt_vs_MS.NoTrt_F |
| CD79B     | 0.27808 | 1.18518 | 0.151 | 0.2  | 1 MS.Trt_vs_MS.NoTrt_F |
| GLRX5     | 0.27813 | 0.59582 | 0.119 | 0.16 | 1 MS.Trt_vs_MS.NoTrt_F |
| ZNF549    | 0.27831 | 0.94314 | 0.673 | 0.73 | 1 MS.Trt_vs_MS.NoTrt_F |
| SMCR8     | 0.27877 | 0.6557  | 0.302 | 0.36 | 1 MS.Trt_vs_MS.NoTrt_F |
| ICE1      | 0.27901 | 1.24581 | 0.14  | 0.19 | 1 MS.Trt_vs_MS.NoTrt_F |
| NBPF10    | 0.27915 | -0.3938 | 0.252 | 0.3  | 1 MS.Trt_vs_MS.NoTrt_F |
| SFXN2     | 0.27942 | -0.3981 | 0.917 | 0.93 | 1 MS.Trt_vs_MS.NoTrt_F |
| MBD5      | 0.27953 | -0.4602 | 0.835 | 0.82 | 1 MS.Trt_vs_MS.NoTrt_F |
| DRG1      | 0.27957 | 1.04314 | 0.191 | 0.25 | 1 MS.Trt_vs_MS.NoTrt_F |
| GOLGA6L22 | 0.27982 | 0.3787  | 0.421 | 0.41 | 1 MS.Trt_vs_MS.NoTrt_F |
| PRAMEF1   | 0.27989 | 0.26402 | 0.108 | 0.14 | 1 MS.Trt_vs_MS.NoTrt_F |
| COQ8A     | 0.27996 | 0.42833 | 0.644 | 0.7  | 1 MS.Trt_vs_MS.NoTrt_F |
| CREB3L4   | 0.28033 | 0.61139 | 0.374 | 0.44 | 1 MS.Trt_vs_MS.NoTrt_F |
| DNAJC1    | 0.28051 | 1.5661  | 0.137 | 0.18 | 1 MS.Trt_vs_MS.NoTrt_F |
| GGT5      | 0.28086 | 0.44213 | 0.737 | 0.75 | 1 MS.Trt_vs_MS.NoTrt_F |
| ATP5G1    | 0.28107 | 0.52707 | 0.317 | 0.38 | 1 MS.Trt_vs_MS.NoTrt_F |
| ZNF213    | 0.28129 | 0.90208 | 0.5   | 0.48 | 1 MS.Trt_vs_MS.NoTrt_F |
| IFIT3     | 0.28132 | 1.076   | 0.558 | 0.55 | 1 MS.Trt_vs_MS.NoTrt_F |
| TRIM66    | 0.28165 | 0.6262  | 0.489 | 0.55 | 1 MS.Trt_vs_MS.NoTrt_F |
| ZNF675    | 0.28207 | 0.59865 | 0.903 | 0.96 | 1 MS.Trt_vs_MS.NoTrt_F |

|            |         |         |       |      |                        |
|------------|---------|---------|-------|------|------------------------|
| ZNF578     | 0.28329 | 0.4238  | 0.946 | 0.97 | 1 MS.Trt_vs_MS.NoTrt_F |
| NFS1       | 0.28353 | 0.53693 | 0.906 | 0.92 | 1 MS.Trt_vs_MS.NoTrt_F |
| FBXW8      | 0.28482 | -0.5451 | 0.331 | 0.38 | 1 MS.Trt_vs_MS.NoTrt_F |
| 7-Mar      | 0.28495 | 1.08659 | 0.273 | 0.33 | 1 MS.Trt_vs_MS.NoTrt_F |
| ZNF559-ZNF | 0.28504 | 0.28368 | 0.076 | 0.11 | 1 MS.Trt_vs_MS.NoTrt_F |
| PCBP1      | 0.28515 | 0.71357 | 0.464 | 0.56 | 1 MS.Trt_vs_MS.NoTrt_F |
| TTBK2      | 0.28515 | -1.1502 | 0.529 | 0.55 | 1 MS.Trt_vs_MS.NoTrt_F |
| AKAP6      | 0.28528 | 0.71285 | 0.662 | 0.76 | 1 MS.Trt_vs_MS.NoTrt_F |
| RP11-80H18 | 0.28536 | 0.44233 | 0.306 | 0.37 | 1 MS.Trt_vs_MS.NoTrt_F |
| SYNC       | 0.28543 | 0.96605 | 0.191 | 0.25 | 1 MS.Trt_vs_MS.NoTrt_F |
| SUSD3      | 0.28637 | 0.27994 | 0.396 | 0.48 | 1 MS.Trt_vs_MS.NoTrt_F |
| FLG2       | 0.28644 | -0.6448 | 0.457 | 0.5  | 1 MS.Trt_vs_MS.NoTrt_F |
| UBAP2      | 0.28659 | -0.5058 | 0.683 | 0.75 | 1 MS.Trt_vs_MS.NoTrt_F |
| STXBP1     | 0.28703 | -0.4125 | 0.076 | 0.11 | 1 MS.Trt_vs_MS.NoTrt_F |
| PMPCB      | 0.28766 | 0.51494 | 0.554 | 0.65 | 1 MS.Trt_vs_MS.NoTrt_F |
| PAPD4      | 0.28771 | 0.36572 | 0.299 | 0.36 | 1 MS.Trt_vs_MS.NoTrt_F |
| KMT5A      | 0.28817 | 0.58659 | 0.245 | 0.32 | 1 MS.Trt_vs_MS.NoTrt_F |
| STRADA     | 0.28823 | 0.37581 | 0.54  | 0.62 | 1 MS.Trt_vs_MS.NoTrt_F |
| SPIN1      | 0.28836 | 0.72219 | 0.194 | 0.24 | 1 MS.Trt_vs_MS.NoTrt_F |
| GPR89A     | 0.28886 | 0.89108 | 0.432 | 0.52 | 1 MS.Trt_vs_MS.NoTrt_F |
| ABR        | 0.28909 | -0.3146 | 0.748 | 0.79 | 1 MS.Trt_vs_MS.NoTrt_F |
| RSAD2      | 0.28991 | -0.6414 | 0.327 | 0.39 | 1 MS.Trt_vs_MS.NoTrt_F |
| AASS       | 0.28999 | 1.21058 | 0.353 | 0.44 | 1 MS.Trt_vs_MS.NoTrt_F |
| EPPK1      | 0.29012 | 1.15618 | 0.101 | 0.14 | 1 MS.Trt_vs_MS.NoTrt_F |
| PMS2       | 0.29017 | 0.34256 | 0.622 | 0.73 | 1 MS.Trt_vs_MS.NoTrt_F |
| ZNF516     | 0.2902  | 1.99253 | 0.09  | 0.12 | 1 MS.Trt_vs_MS.NoTrt_F |
| KLLN       | 0.29057 | 0.8572  | 0.432 | 0.52 | 1 MS.Trt_vs_MS.NoTrt_F |
| NUP50      | 0.2906  | 0.25986 | 0.673 | 0.75 | 1 MS.Trt_vs_MS.NoTrt_F |
| HERC2      | 0.29074 | 0.25826 | 0.856 | 0.91 | 1 MS.Trt_vs_MS.NoTrt_F |
| TMIGD2     | 0.29104 | 0.54433 | 0.252 | 0.3  | 1 MS.Trt_vs_MS.NoTrt_F |
| ARHGAP18   | 0.29107 | 0.40008 | 0.151 | 0.19 | 1 MS.Trt_vs_MS.NoTrt_F |
| SCYL3      | 0.29131 | 0.50394 | 0.712 | 0.72 | 1 MS.Trt_vs_MS.NoTrt_F |
| ZBTB11     | 0.29155 | 0.5598  | 0.529 | 0.61 | 1 MS.Trt_vs_MS.NoTrt_F |
| KIF3A      | 0.29158 | 0.51058 | 0.694 | 0.72 | 1 MS.Trt_vs_MS.NoTrt_F |
| TMEM25     | 0.29171 | 1.25316 | 0.396 | 0.48 | 1 MS.Trt_vs_MS.NoTrt_F |
| USP22      | 0.29211 | 0.65319 | 0.817 | 0.84 | 1 MS.Trt_vs_MS.NoTrt_F |
| ADAR       | 0.2923  | -0.5877 | 0.809 | 0.8  | 1 MS.Trt_vs_MS.NoTrt_F |
| GM2A       | 0.29249 | -0.3391 | 0.572 | 0.58 | 1 MS.Trt_vs_MS.NoTrt_F |
| ZFAND2A    | 0.29267 | 0.45264 | 0.122 | 0.16 | 1 MS.Trt_vs_MS.NoTrt_F |
| CEP250     | 0.29356 | 0.52415 | 0.784 | 0.87 | 1 MS.Trt_vs_MS.NoTrt_F |

|          |         |         |       |      |   |                      |
|----------|---------|---------|-------|------|---|----------------------|
| BECN1    | 0.29387 | 0.43701 | 0.727 | 0.79 | 1 | MS.Trt_vs_MS.NoTrt_F |
| NOVA1    | 0.29414 | -0.348  | 0.09  | 0.12 | 1 | MS.Trt_vs_MS.NoTrt_F |
| GPX3     | 0.29441 | -0.2747 | 0.104 | 0.14 | 1 | MS.Trt_vs_MS.NoTrt_F |
| KIAA1671 | 0.2949  | 0.43419 | 0.507 | 0.62 | 1 | MS.Trt_vs_MS.NoTrt_F |
| CNIH3    | 0.29528 | -0.3734 | 0.191 | 0.23 | 1 | MS.Trt_vs_MS.NoTrt_F |
| PMM2     | 0.29532 | -0.5084 | 0.745 | 0.79 | 1 | MS.Trt_vs_MS.NoTrt_F |
| NAGA     | 0.29577 | 1.2694  | 0.144 | 0.19 | 1 | MS.Trt_vs_MS.NoTrt_F |
| MAPKAPK2 | 0.29652 | 0.31942 | 0.094 | 0.13 | 1 | MS.Trt_vs_MS.NoTrt_F |
| MAGT1    | 0.29672 | 0.43886 | 0.82  | 0.84 | 1 | MS.Trt_vs_MS.NoTrt_F |
| CDC26    | 0.29743 | 0.82266 | 0.248 | 0.33 | 1 | MS.Trt_vs_MS.NoTrt_F |
| EFL1     | 0.29803 | 1.09203 | 0.151 | 0.19 | 1 | MS.Trt_vs_MS.NoTrt_F |
| CEP70    | 0.29813 | 0.73504 | 0.162 | 0.2  | 1 | MS.Trt_vs_MS.NoTrt_F |
| HEXA     | 0.2988  | 0.42447 | 0.701 | 0.77 | 1 | MS.Trt_vs_MS.NoTrt_F |
| PPP1CC   | 0.29892 | -0.2976 | 0.763 | 0.79 | 1 | MS.Trt_vs_MS.NoTrt_F |
| CECR5    | 0.29946 | 0.46621 | 0.187 | 0.23 | 1 | MS.Trt_vs_MS.NoTrt_F |
| SLC15A4  | 0.29982 | 0.36195 | 0.755 | 0.8  | 1 | MS.Trt_vs_MS.NoTrt_F |
| SDR42E1  | 0.29983 | -0.3153 | 0.378 | 0.45 | 1 | MS.Trt_vs_MS.NoTrt_F |
| LPP      | 0.30023 | -0.4103 | 0.957 | 0.96 | 1 | MS.Trt_vs_MS.NoTrt_F |
| CARM1    | 0.30047 | -0.2678 | 0.169 | 0.22 | 1 | MS.Trt_vs_MS.NoTrt_F |
| PDGFRA   | 0.30049 | -0.2802 | 0.219 | 0.28 | 1 | MS.Trt_vs_MS.NoTrt_F |
| ST20     | 0.30055 | 0.2707  | 0.248 | 0.22 | 1 | MS.Trt_vs_MS.NoTrt_F |
| ZHX1     | 0.30105 | 0.28587 | 0.565 | 0.61 | 1 | MS.Trt_vs_MS.NoTrt_F |
| NUDCD2   | 0.30186 | 0.28774 | 0.77  | 0.76 | 1 | MS.Trt_vs_MS.NoTrt_F |
| ZFYVE26  | 0.30255 | 0.34115 | 0.871 | 0.86 | 1 | MS.Trt_vs_MS.NoTrt_F |
| VPS26A   | 0.30261 | 0.59359 | 0.378 | 0.42 | 1 | MS.Trt_vs_MS.NoTrt_F |
| ZNF764   | 0.30264 | 0.76852 | 0.331 | 0.4  | 1 | MS.Trt_vs_MS.NoTrt_F |
| CREG1    | 0.30266 | 0.76612 | 0.313 | 0.38 | 1 | MS.Trt_vs_MS.NoTrt_F |
| TPMT     | 0.30266 | 0.25879 | 0.737 | 0.8  | 1 | MS.Trt_vs_MS.NoTrt_F |
| SPOP     | 0.30295 | -0.2981 | 0.946 | 0.98 | 1 | MS.Trt_vs_MS.NoTrt_F |
| MOSPD1   | 0.30347 | -0.8931 | 0.219 | 0.27 | 1 | MS.Trt_vs_MS.NoTrt_F |
| STARD9   | 0.30359 | 0.35936 | 0.896 | 0.91 | 1 | MS.Trt_vs_MS.NoTrt_F |
| FUBP3    | 0.30458 | 0.36294 | 0.115 | 0.16 | 1 | MS.Trt_vs_MS.NoTrt_F |
| GATSL3   | 0.30504 | 0.44927 | 0.076 | 0.11 | 1 | MS.Trt_vs_MS.NoTrt_F |
| B3GALT1  | 0.30542 | 0.27372 | 0.547 | 0.5  | 1 | MS.Trt_vs_MS.NoTrt_F |
| CTSH     | 0.30543 | 0.74    | 0.108 | 0.14 | 1 | MS.Trt_vs_MS.NoTrt_F |
| AEBP2    | 0.30577 | 1.28741 | 0.691 | 0.77 | 1 | MS.Trt_vs_MS.NoTrt_F |
| ZNF524   | 0.3058  | 0.57078 | 0.147 | 0.19 | 1 | MS.Trt_vs_MS.NoTrt_F |
| PLD3     | 0.30589 | 0.45669 | 0.723 | 0.82 | 1 | MS.Trt_vs_MS.NoTrt_F |
| HINFP    | 0.3059  | -0.3539 | 0.996 | 0.99 | 1 | MS.Trt_vs_MS.NoTrt_F |
| TBC1D3I  | 0.30643 | 0.29723 | 0.245 | 0.29 | 1 | MS.Trt_vs_MS.NoTrt_F |

|            |         |         |       |      |                        |
|------------|---------|---------|-------|------|------------------------|
| GTF2E2     | 0.30647 | 0.53797 | 0.604 | 0.7  | 1 MS.Trt_vs_MS.NoTrt_F |
| ELL2       | 0.3065  | -0.5953 | 0.086 | 0.12 | 1 MS.Trt_vs_MS.NoTrt_F |
| FAM60A     | 0.30687 | 0.27254 | 0.504 | 0.56 | 1 MS.Trt_vs_MS.NoTrt_F |
| ABHD6      | 0.30701 | 0.80577 | 0.493 | 0.56 | 1 MS.Trt_vs_MS.NoTrt_F |
| CDH13      | 0.30704 | 0.32954 | 0.755 | 0.74 | 1 MS.Trt_vs_MS.NoTrt_F |
| RFX5       | 0.30729 | 0.78604 | 0.327 | 0.38 | 1 MS.Trt_vs_MS.NoTrt_F |
| SNAPC3     | 0.30758 | 0.50961 | 0.586 | 0.64 | 1 MS.Trt_vs_MS.NoTrt_F |
| LPAR4      | 0.30776 | -0.8256 | 0.173 | 0.2  | 1 MS.Trt_vs_MS.NoTrt_F |
| HIST1H3E   | 0.30851 | -0.4365 | 0.158 | 0.2  | 1 MS.Trt_vs_MS.NoTrt_F |
| GP1BA      | 0.3086  | 0.68347 | 0.076 | 0.11 | 1 MS.Trt_vs_MS.NoTrt_F |
| POLR1C     | 0.30897 | 0.84344 | 0.432 | 0.49 | 1 MS.Trt_vs_MS.NoTrt_F |
| HBB        | 0.30976 | 0.37265 | 0.104 | 0.14 | 1 MS.Trt_vs_MS.NoTrt_F |
| RABL6      | 0.31015 | 0.57961 | 0.572 | 0.6  | 1 MS.Trt_vs_MS.NoTrt_F |
| ADRM1      | 0.31028 | 0.51707 | 0.273 | 0.34 | 1 MS.Trt_vs_MS.NoTrt_F |
| CTSC       | 0.31029 | 0.30012 | 0.853 | 0.91 | 1 MS.Trt_vs_MS.NoTrt_F |
| ARIH1      | 0.31031 | 0.40301 | 0.96  | 0.97 | 1 MS.Trt_vs_MS.NoTrt_F |
| XRCC3      | 0.31048 | -0.661  | 0.45  | 0.5  | 1 MS.Trt_vs_MS.NoTrt_F |
| INPP5F     | 0.31109 | 0.56767 | 0.317 | 0.38 | 1 MS.Trt_vs_MS.NoTrt_F |
| CORIN      | 0.31113 | -0.3211 | 0.597 | 0.63 | 1 MS.Trt_vs_MS.NoTrt_F |
| PRKAB1     | 0.31225 | -0.2744 | 0.788 | 0.79 | 1 MS.Trt_vs_MS.NoTrt_F |
| TRIM34     | 0.31237 | 1.6774  | 0.313 | 0.37 | 1 MS.Trt_vs_MS.NoTrt_F |
| SLC16A4    | 0.31243 | 0.57965 | 0.691 | 0.69 | 1 MS.Trt_vs_MS.NoTrt_F |
| EXTL2      | 0.31248 | 0.78061 | 0.094 | 0.13 | 1 MS.Trt_vs_MS.NoTrt_F |
| ACOX1      | 0.313   | -0.3091 | 0.73  | 0.74 | 1 MS.Trt_vs_MS.NoTrt_F |
| PUS10      | 0.31301 | -0.278  | 0.719 | 0.7  | 1 MS.Trt_vs_MS.NoTrt_F |
| SMPD4      | 0.31395 | 0.49605 | 0.302 | 0.34 | 1 MS.Trt_vs_MS.NoTrt_F |
| ZNF433     | 0.31433 | 1.09033 | 0.162 | 0.2  | 1 MS.Trt_vs_MS.NoTrt_F |
| MAP7D3     | 0.31436 | 0.79883 | 0.597 | 0.65 | 1 MS.Trt_vs_MS.NoTrt_F |
| PLOD3      | 0.31524 | -0.4586 | 0.669 | 0.78 | 1 MS.Trt_vs_MS.NoTrt_F |
| RRM2       | 0.31563 | 0.27134 | 0.478 | 0.56 | 1 MS.Trt_vs_MS.NoTrt_F |
| HLTF       | 0.31566 | 1.17425 | 0.439 | 0.51 | 1 MS.Trt_vs_MS.NoTrt_F |
| LCA5L      | 0.31592 | 0.36739 | 0.41  | 0.5  | 1 MS.Trt_vs_MS.NoTrt_F |
| PMF1-BGLAI | 0.31595 | 1.49057 | 0.122 | 0.17 | 1 MS.Trt_vs_MS.NoTrt_F |
| CRIM1      | 0.31667 | 1.00834 | 0.209 | 0.27 | 1 MS.Trt_vs_MS.NoTrt_F |
| XAF1       | 0.31677 | 0.52192 | 0.723 | 0.84 | 1 MS.Trt_vs_MS.NoTrt_F |
| FAAP20     | 0.31698 | 0.50784 | 0.899 | 0.87 | 1 MS.Trt_vs_MS.NoTrt_F |
| C17orf89   | 0.31699 | 1.51432 | 0.119 | 0.16 | 1 MS.Trt_vs_MS.NoTrt_F |
| PRPF40B    | 0.31713 | 0.78042 | 0.288 | 0.36 | 1 MS.Trt_vs_MS.NoTrt_F |
| MLST8      | 0.31737 | -0.6846 | 0.421 | 0.48 | 1 MS.Trt_vs_MS.NoTrt_F |
| C1orf50    | 0.31742 | 0.35925 | 0.705 | 0.75 | 1 MS.Trt_vs_MS.NoTrt_F |

|            |         |         |       |      |                        |
|------------|---------|---------|-------|------|------------------------|
| ZNF687     | 0.3175  | -0.343  | 0.644 | 0.7  | 1 MS.Trt_vs_MS.NoTrt_F |
| FSD1       | 0.31781 | 0.47704 | 0.432 | 0.42 | 1 MS.Trt_vs_MS.NoTrt_F |
| HSF2       | 0.31785 | 1.30321 | 0.115 | 0.16 | 1 MS.Trt_vs_MS.NoTrt_F |
| SP110      | 0.31814 | 0.50316 | 0.676 | 0.74 | 1 MS.Trt_vs_MS.NoTrt_F |
| RPS27L     | 0.3182  | 0.26928 | 0.982 | 0.99 | 1 MS.Trt_vs_MS.NoTrt_F |
| RTCA       | 0.31832 | 0.68502 | 0.576 | 0.64 | 1 MS.Trt_vs_MS.NoTrt_F |
| MASP2      | 0.31897 | 0.3068  | 0.295 | 0.34 | 1 MS.Trt_vs_MS.NoTrt_F |
| MAK        | 0.31963 | 0.37936 | 0.187 | 0.23 | 1 MS.Trt_vs_MS.NoTrt_F |
| PHLDA3     | 0.3206  | 0.27601 | 0.345 | 0.4  | 1 MS.Trt_vs_MS.NoTrt_F |
| FAM98B     | 0.32072 | 0.37106 | 0.432 | 0.5  | 1 MS.Trt_vs_MS.NoTrt_F |
| FAM129C    | 0.32103 | 0.2928  | 0.831 | 0.85 | 1 MS.Trt_vs_MS.NoTrt_F |
| COIL       | 0.32122 | 0.67157 | 0.151 | 0.19 | 1 MS.Trt_vs_MS.NoTrt_F |
| IMPDH2     | 0.32126 | 0.63607 | 0.223 | 0.28 | 1 MS.Trt_vs_MS.NoTrt_F |
| FPR2       | 0.32163 | -0.5349 | 0.482 | 0.43 | 1 MS.Trt_vs_MS.NoTrt_F |
| LRRFIP1    | 0.32176 | 0.33945 | 0.989 | 1    | 1 MS.Trt_vs_MS.NoTrt_F |
| SPDYE2B    | 0.3222  | 0.77443 | 0.299 | 0.4  | 1 MS.Trt_vs_MS.NoTrt_F |
| ZNF17      | 0.32252 | 1.28231 | 0.324 | 0.39 | 1 MS.Trt_vs_MS.NoTrt_F |
| SKA2       | 0.32253 | 0.53541 | 0.594 | 0.63 | 1 MS.Trt_vs_MS.NoTrt_F |
| LZIC       | 0.32497 | -0.3911 | 0.817 | 0.85 | 1 MS.Trt_vs_MS.NoTrt_F |
| SMG9       | 0.32545 | 0.69763 | 0.594 | 0.66 | 1 MS.Trt_vs_MS.NoTrt_F |
| UBE2R2     | 0.3262  | 0.70586 | 0.108 | 0.14 | 1 MS.Trt_vs_MS.NoTrt_F |
| ARSB       | 0.32658 | 0.83825 | 0.615 | 0.59 | 1 MS.Trt_vs_MS.NoTrt_F |
| GDPGP1     | 0.32665 | 0.44438 | 0.924 | 0.96 | 1 MS.Trt_vs_MS.NoTrt_F |
| ABCB8      | 0.32672 | 0.60551 | 0.633 | 0.56 | 1 MS.Trt_vs_MS.NoTrt_F |
| SPHK2      | 0.3275  | -0.3043 | 0.324 | 0.37 | 1 MS.Trt_vs_MS.NoTrt_F |
| PRKCSH     | 0.32754 | 0.5547  | 0.716 | 0.72 | 1 MS.Trt_vs_MS.NoTrt_F |
| CASP4      | 0.32756 | 0.31625 | 0.396 | 0.46 | 1 MS.Trt_vs_MS.NoTrt_F |
| ZHX3       | 0.32768 | 0.53772 | 0.36  | 0.41 | 1 MS.Trt_vs_MS.NoTrt_F |
| CLN8       | 0.32775 | 0.55334 | 0.799 | 0.8  | 1 MS.Trt_vs_MS.NoTrt_F |
| ELMOD3     | 0.32791 | 0.39954 | 0.86  | 0.93 | 1 MS.Trt_vs_MS.NoTrt_F |
| SLC11A1    | 0.32792 | 0.26984 | 0.95  | 0.93 | 1 MS.Trt_vs_MS.NoTrt_F |
| ANGPT2     | 0.32916 | 0.44485 | 0.795 | 0.76 | 1 MS.Trt_vs_MS.NoTrt_F |
| RIT1       | 0.32936 | 1.08554 | 0.424 | 0.5  | 1 MS.Trt_vs_MS.NoTrt_F |
| SLC25A42   | 0.3294  | 0.93226 | 0.536 | 0.61 | 1 MS.Trt_vs_MS.NoTrt_F |
| CTD-2370NE | 0.32952 | 0.39898 | 0.165 | 0.21 | 1 MS.Trt_vs_MS.NoTrt_F |
| AK3        | 0.32955 | -0.5067 | 0.5   | 0.51 | 1 MS.Trt_vs_MS.NoTrt_F |
| FUT4       | 0.32968 | 0.4009  | 0.353 | 0.4  | 1 MS.Trt_vs_MS.NoTrt_F |
| TOE1       | 0.3305  | 0.5289  | 0.101 | 0.13 | 1 MS.Trt_vs_MS.NoTrt_F |
| RDH11      | 0.33052 | 0.2557  | 0.504 | 0.55 | 1 MS.Trt_vs_MS.NoTrt_F |
| PRC1       | 0.33069 | 0.34468 | 0.554 | 0.65 | 1 MS.Trt_vs_MS.NoTrt_F |

|          |         |         |       |      |                        |
|----------|---------|---------|-------|------|------------------------|
| KNTC1    | 0.33121 | 1.23489 | 0.813 | 0.8  | 1 MS.Trt_vs_MS.NoTrt_F |
| ARID5B   | 0.33205 | 0.64681 | 0.773 | 0.84 | 1 MS.Trt_vs_MS.NoTrt_F |
| SUDS3    | 0.33256 | -0.8788 | 0.813 | 0.81 | 1 MS.Trt_vs_MS.NoTrt_F |
| RPS17    | 0.33275 | 0.72508 | 0.417 | 0.46 | 1 MS.Trt_vs_MS.NoTrt_F |
| XPOT     | 0.33293 | 0.38923 | 0.457 | 0.5  | 1 MS.Trt_vs_MS.NoTrt_F |
| NARF     | 0.33304 | -0.2717 | 0.946 | 0.97 | 1 MS.Trt_vs_MS.NoTrt_F |
| ZNF487   | 0.33332 | -0.6401 | 0.482 | 0.53 | 1 MS.Trt_vs_MS.NoTrt_F |
| ZNF493   | 0.33334 | 0.7278  | 0.827 | 0.8  | 1 MS.Trt_vs_MS.NoTrt_F |
| CXCL16   | 0.33348 | 0.33302 | 0.622 | 0.61 | 1 MS.Trt_vs_MS.NoTrt_F |
| LIMD1    | 0.33369 | -0.5462 | 0.827 | 0.87 | 1 MS.Trt_vs_MS.NoTrt_F |
| FBXO46   | 0.33473 | 0.51837 | 0.295 | 0.34 | 1 MS.Trt_vs_MS.NoTrt_F |
| RINT1    | 0.33506 | 0.37521 | 0.55  | 0.62 | 1 MS.Trt_vs_MS.NoTrt_F |
| PHACTR2  | 0.33526 | 0.68095 | 0.637 | 0.69 | 1 MS.Trt_vs_MS.NoTrt_F |
| NLRP3    | 0.33536 | 1.78738 | 0.23  | 0.29 | 1 MS.Trt_vs_MS.NoTrt_F |
| TOR1AIP2 | 0.33601 | 0.5543  | 0.982 | 0.99 | 1 MS.Trt_vs_MS.NoTrt_F |
| COLGALT1 | 0.3361  | 0.59893 | 0.468 | 0.54 | 1 MS.Trt_vs_MS.NoTrt_F |
| RPGRIP1L | 0.33614 | 0.50592 | 0.755 | 0.74 | 1 MS.Trt_vs_MS.NoTrt_F |
| NIN      | 0.33659 | 0.34331 | 0.219 | 0.27 | 1 MS.Trt_vs_MS.NoTrt_F |
| CTSL     | 0.337   | 1.62772 | 0.137 | 0.11 | 1 MS.Trt_vs_MS.NoTrt_F |
| CYP46A1  | 0.33736 | 0.7456  | 0.55  | 0.6  | 1 MS.Trt_vs_MS.NoTrt_F |
| GCDH     | 0.33788 | 0.62332 | 0.194 | 0.24 | 1 MS.Trt_vs_MS.NoTrt_F |
| PTRH1    | 0.33837 | 0.75552 | 0.712 | 0.74 | 1 MS.Trt_vs_MS.NoTrt_F |
| RBM19    | 0.33847 | 0.53566 | 0.45  | 0.53 | 1 MS.Trt_vs_MS.NoTrt_F |
| NEPRO    | 0.33859 | -0.4946 | 0.219 | 0.25 | 1 MS.Trt_vs_MS.NoTrt_F |
| NBR1     | 0.33918 | -0.3228 | 0.781 | 0.81 | 1 MS.Trt_vs_MS.NoTrt_F |
| KCNC4    | 0.33953 | 0.79767 | 0.701 | 0.82 | 1 MS.Trt_vs_MS.NoTrt_F |
| HN1L     | 0.33965 | 0.59113 | 0.327 | 0.39 | 1 MS.Trt_vs_MS.NoTrt_F |
| SELL     | 0.34012 | 0.32072 | 0.55  | 0.69 | 1 MS.Trt_vs_MS.NoTrt_F |
| COG6     | 0.34036 | 0.89272 | 0.176 | 0.22 | 1 MS.Trt_vs_MS.NoTrt_F |
| CNIH4    | 0.34039 | 0.2933  | 0.615 | 0.65 | 1 MS.Trt_vs_MS.NoTrt_F |
| PCIF1    | 0.34121 | 0.54381 | 0.32  | 0.4  | 1 MS.Trt_vs_MS.NoTrt_F |
| KCTD10   | 0.34124 | 1.20299 | 0.414 | 0.37 | 1 MS.Trt_vs_MS.NoTrt_F |
| TCOF1    | 0.34132 | 0.3927  | 0.773 | 0.88 | 1 MS.Trt_vs_MS.NoTrt_F |
| SLC25A51 | 0.34142 | -0.6638 | 0.59  | 0.64 | 1 MS.Trt_vs_MS.NoTrt_F |
| APMAP    | 0.34166 | 0.76916 | 0.209 | 0.26 | 1 MS.Trt_vs_MS.NoTrt_F |
| ZNF93    | 0.34214 | 0.41741 | 0.525 | 0.6  | 1 MS.Trt_vs_MS.NoTrt_F |
| ATM      | 0.3422  | 0.56317 | 0.957 | 0.95 | 1 MS.Trt_vs_MS.NoTrt_F |
| APOE     | 0.34303 | 0.30049 | 0.719 | 0.81 | 1 MS.Trt_vs_MS.NoTrt_F |
| SCRG1    | 0.34305 | 0.30358 | 0.763 | 0.75 | 1 MS.Trt_vs_MS.NoTrt_F |
| H1FX     | 0.34373 | 1.15868 | 0.09  | 0.12 | 1 MS.Trt_vs_MS.NoTrt_F |

|            |         |         |       |      |                        |
|------------|---------|---------|-------|------|------------------------|
| CERKL      | 0.34426 | 0.5034  | 0.36  | 0.45 | 1 MS.Trt_vs_MS.NoTrt_F |
| STT3B      | 0.34434 | 0.72235 | 0.604 | 0.58 | 1 MS.Trt_vs_MS.NoTrt_F |
| PDCD7      | 0.34459 | 0.34913 | 0.442 | 0.48 | 1 MS.Trt_vs_MS.NoTrt_F |
| FANCC      | 0.3446  | -0.3305 | 0.313 | 0.34 | 1 MS.Trt_vs_MS.NoTrt_F |
| DPY19L3    | 0.34481 | -0.4065 | 0.903 | 0.93 | 1 MS.Trt_vs_MS.NoTrt_F |
| RP11-577H5 | 0.34489 | 1.04477 | 0.133 | 0.17 | 1 MS.Trt_vs_MS.NoTrt_F |
| MYL6       | 0.345   | 0.4821  | 0.712 | 0.88 | 1 MS.Trt_vs_MS.NoTrt_F |
| THBS4      | 0.3452  | 1.21903 | 0.086 | 0.12 | 1 MS.Trt_vs_MS.NoTrt_F |
| POMT2      | 0.34554 | 0.26946 | 0.942 | 0.95 | 1 MS.Trt_vs_MS.NoTrt_F |
| PFAS       | 0.34607 | 0.34376 | 0.601 | 0.58 | 1 MS.Trt_vs_MS.NoTrt_F |
| LAMP3      | 0.34726 | 0.68647 | 0.446 | 0.55 | 1 MS.Trt_vs_MS.NoTrt_F |
| IST1       | 0.34738 | 0.28699 | 0.644 | 0.72 | 1 MS.Trt_vs_MS.NoTrt_F |
| FUT3       | 0.34781 | -0.3137 | 0.219 | 0.27 | 1 MS.Trt_vs_MS.NoTrt_F |
| PSTPIP1    | 0.34836 | 0.37649 | 0.46  | 0.51 | 1 MS.Trt_vs_MS.NoTrt_F |
| CSF1R      | 0.34838 | -0.8322 | 0.223 | 0.27 | 1 MS.Trt_vs_MS.NoTrt_F |
| RP11-552F3 | 0.34869 | -0.4056 | 0.201 | 0.24 | 1 MS.Trt_vs_MS.NoTrt_F |
| CCNG1      | 0.34915 | 0.81088 | 0.27  | 0.34 | 1 MS.Trt_vs_MS.NoTrt_F |
| C1orf159   | 0.34922 | 1.25269 | 0.183 | 0.23 | 1 MS.Trt_vs_MS.NoTrt_F |
| HDDC3      | 0.34948 | -0.9843 | 0.385 | 0.43 | 1 MS.Trt_vs_MS.NoTrt_F |
| FAM110D    | 0.34979 | 0.39124 | 0.464 | 0.47 | 1 MS.Trt_vs_MS.NoTrt_F |
| IL10RB     | 0.34985 | 1.15819 | 0.457 | 0.51 | 1 MS.Trt_vs_MS.NoTrt_F |
| ABHD2      | 0.35025 | 0.61853 | 0.651 | 0.69 | 1 MS.Trt_vs_MS.NoTrt_F |
| GFOD1      | 0.35115 | 1.16694 | 0.626 | 0.66 | 1 MS.Trt_vs_MS.NoTrt_F |
| ZNF805     | 0.3513  | 1.16238 | 0.766 | 0.79 | 1 MS.Trt_vs_MS.NoTrt_F |
| RPL36AL    | 0.35141 | 0.57565 | 0.525 | 0.72 | 1 MS.Trt_vs_MS.NoTrt_F |
| IL4R       | 0.35144 | -0.7472 | 0.478 | 0.49 | 1 MS.Trt_vs_MS.NoTrt_F |
| IREB2      | 0.35167 | -0.316  | 0.748 | 0.83 | 1 MS.Trt_vs_MS.NoTrt_F |
| XYLT2      | 0.35224 | 0.72709 | 0.647 | 0.63 | 1 MS.Trt_vs_MS.NoTrt_F |
| BHMT       | 0.35235 | 0.33462 | 0.522 | 0.57 | 1 MS.Trt_vs_MS.NoTrt_F |
| MICAL2     | 0.35311 | 0.72096 | 0.795 | 0.86 | 1 MS.Trt_vs_MS.NoTrt_F |
| ZNF257     | 0.35316 | 0.29899 | 0.572 | 0.51 | 1 MS.Trt_vs_MS.NoTrt_F |
| OR7A5      | 0.35317 | 0.25885 | 0.428 | 0.5  | 1 MS.Trt_vs_MS.NoTrt_F |
| ABHD11     | 0.35325 | -0.4529 | 0.59  | 0.69 | 1 MS.Trt_vs_MS.NoTrt_F |
| IGFBP2     | 0.3533  | 0.25642 | 0.637 | 0.64 | 1 MS.Trt_vs_MS.NoTrt_F |
| ANKMY1     | 0.35377 | 0.26679 | 0.374 | 0.44 | 1 MS.Trt_vs_MS.NoTrt_F |
| TEX101     | 0.3538  | 1.17642 | 0.086 | 0.12 | 1 MS.Trt_vs_MS.NoTrt_F |
| GVQW1      | 0.35481 | 0.31541 | 0.532 | 0.5  | 1 MS.Trt_vs_MS.NoTrt_F |
| ZNF264     | 0.3549  | 0.87147 | 0.953 | 0.95 | 1 MS.Trt_vs_MS.NoTrt_F |
| DNAJC22    | 0.35495 | -0.4331 | 0.349 | 0.4  | 1 MS.Trt_vs_MS.NoTrt_F |
| MAEL       | 0.35498 | 0.26857 | 0.572 | 0.54 | 1 MS.Trt_vs_MS.NoTrt_F |



|            |         |         |       |      |   |                      |
|------------|---------|---------|-------|------|---|----------------------|
| GTF2H4     | 0.35504 | 0.31851 | 0.137 | 0.18 | 1 | MS.Trt_vs_MS.NoTrt_F |
| TMED10     | 0.35516 | 0.33507 | 0.669 | 0.71 | 1 | MS.Trt_vs_MS.NoTrt_F |
| WDR33      | 0.35542 | 0.56006 | 0.277 | 0.33 | 1 | MS.Trt_vs_MS.NoTrt_F |
| PDP2       | 0.35592 | -0.6498 | 0.795 | 0.8  | 1 | MS.Trt_vs_MS.NoTrt_F |
| VAV3       | 0.35625 | -0.5831 | 0.604 | 0.6  | 1 | MS.Trt_vs_MS.NoTrt_F |
| PURB       | 0.35665 | -0.4354 | 0.478 | 0.45 | 1 | MS.Trt_vs_MS.NoTrt_F |
| CDNF       | 0.35665 | 0.76032 | 0.227 | 0.28 | 1 | MS.Trt_vs_MS.NoTrt_F |
| ZNF414     | 0.3574  | 0.25888 | 0.687 | 0.67 | 1 | MS.Trt_vs_MS.NoTrt_F |
| DLGAP1     | 0.35818 | 0.69895 | 0.381 | 0.38 | 1 | MS.Trt_vs_MS.NoTrt_F |
| FCER1G     | 0.35866 | 0.86382 | 0.705 | 0.72 | 1 | MS.Trt_vs_MS.NoTrt_F |
| TRIM68     | 0.3587  | -0.5265 | 0.561 | 0.62 | 1 | MS.Trt_vs_MS.NoTrt_F |
| ZRANB3     | 0.35879 | 0.33764 | 0.698 | 0.76 | 1 | MS.Trt_vs_MS.NoTrt_F |
| NDUFA10    | 0.35965 | 0.47541 | 0.335 | 0.39 | 1 | MS.Trt_vs_MS.NoTrt_F |
| TMEM64     | 0.36022 | 0.3513  | 0.385 | 0.46 | 1 | MS.Trt_vs_MS.NoTrt_F |
| FMNL3      | 0.36042 | 0.54878 | 0.327 | 0.39 | 1 | MS.Trt_vs_MS.NoTrt_F |
| UBE2J2     | 0.36188 | 0.64982 | 0.338 | 0.39 | 1 | MS.Trt_vs_MS.NoTrt_F |
| ACSF2      | 0.36209 | 0.69908 | 0.446 | 0.54 | 1 | MS.Trt_vs_MS.NoTrt_F |
| RUBCN      | 0.36254 | 0.27904 | 0.867 | 0.9  | 1 | MS.Trt_vs_MS.NoTrt_F |
| SIMC1      | 0.36274 | 1.03258 | 0.439 | 0.53 | 1 | MS.Trt_vs_MS.NoTrt_F |
| KLHL11     | 0.36284 | 0.7969  | 0.504 | 0.59 | 1 | MS.Trt_vs_MS.NoTrt_F |
| AMT        | 0.36347 | 0.63419 | 0.424 | 0.46 | 1 | MS.Trt_vs_MS.NoTrt_F |
| CCDC138    | 0.3637  | -0.291  | 0.187 | 0.22 | 1 | MS.Trt_vs_MS.NoTrt_F |
| POLH       | 0.36392 | -0.5193 | 0.586 | 0.61 | 1 | MS.Trt_vs_MS.NoTrt_F |
| EPS15      | 0.36397 | 0.29422 | 0.687 | 0.72 | 1 | MS.Trt_vs_MS.NoTrt_F |
| MFAP1      | 0.36502 | 0.45648 | 0.14  | 0.18 | 1 | MS.Trt_vs_MS.NoTrt_F |
| GHRL       | 0.36557 | 0.95018 | 0.129 | 0.17 | 1 | MS.Trt_vs_MS.NoTrt_F |
| BCL2L1     | 0.36592 | 0.41749 | 0.23  | 0.28 | 1 | MS.Trt_vs_MS.NoTrt_F |
| ZNF225     | 0.3661  | -0.5215 | 0.745 | 0.79 | 1 | MS.Trt_vs_MS.NoTrt_F |
| COQ9       | 0.36797 | 1.22672 | 0.133 | 0.17 | 1 | MS.Trt_vs_MS.NoTrt_F |
| MRPL12     | 0.36802 | 1.87237 | 0.09  | 0.12 | 1 | MS.Trt_vs_MS.NoTrt_F |
| TKFC       | 0.36834 | 0.54884 | 0.525 | 0.61 | 1 | MS.Trt_vs_MS.NoTrt_F |
| BCL2L11    | 0.36875 | 0.67717 | 0.504 | 0.55 | 1 | MS.Trt_vs_MS.NoTrt_F |
| HSD11B1L   | 0.36898 | 0.28865 | 0.709 | 0.7  | 1 | MS.Trt_vs_MS.NoTrt_F |
| MRPS11     | 0.36905 | -0.415  | 0.698 | 0.76 | 1 | MS.Trt_vs_MS.NoTrt_F |
| STRN4      | 0.36929 | 0.63133 | 0.478 | 0.55 | 1 | MS.Trt_vs_MS.NoTrt_F |
| MCAM       | 0.36993 | -0.5303 | 0.471 | 0.53 | 1 | MS.Trt_vs_MS.NoTrt_F |
| AP003419.1 | 0.37037 | 0.6116  | 0.219 | 0.28 | 1 | MS.Trt_vs_MS.NoTrt_F |
| PITPNM1    | 0.37104 | 1.07852 | 0.27  | 0.32 | 1 | MS.Trt_vs_MS.NoTrt_F |
| USP28      | 0.37212 | 0.59691 | 0.392 | 0.44 | 1 | MS.Trt_vs_MS.NoTrt_F |
| STXBP3     | 0.37291 | -0.3913 | 0.68  | 0.65 | 1 | MS.Trt_vs_MS.NoTrt_F |

|          |         |         |       |      |   |                      |
|----------|---------|---------|-------|------|---|----------------------|
| GIT2     | 0.37344 | 0.29117 | 0.694 | 0.76 | 1 | MS.Trt_vs_MS.NoTrt_F |
| EIF3B    | 0.37383 | 0.84025 | 0.353 | 0.4  | 1 | MS.Trt_vs_MS.NoTrt_F |
| CACNB1   | 0.37418 | 0.66358 | 0.147 | 0.18 | 1 | MS.Trt_vs_MS.NoTrt_F |
| RNF130   | 0.37457 | 0.65379 | 0.676 | 0.69 | 1 | MS.Trt_vs_MS.NoTrt_F |
| KCTD18   | 0.37638 | 0.31463 | 0.755 | 0.86 | 1 | MS.Trt_vs_MS.NoTrt_F |
| LINS1    | 0.37651 | 0.355   | 0.586 | 0.69 | 1 | MS.Trt_vs_MS.NoTrt_F |
| RNASEH2B | 0.37704 | 0.36155 | 0.719 | 0.79 | 1 | MS.Trt_vs_MS.NoTrt_F |
| TAF6     | 0.3772  | -0.3198 | 0.532 | 0.58 | 1 | MS.Trt_vs_MS.NoTrt_F |
| DNAJC3   | 0.3772  | 0.72838 | 0.532 | 0.63 | 1 | MS.Trt_vs_MS.NoTrt_F |
| QSOX1    | 0.37725 | 0.4295  | 0.385 | 0.43 | 1 | MS.Trt_vs_MS.NoTrt_F |
| MANF     | 0.37771 | 1.14602 | 0.083 | 0.11 | 1 | MS.Trt_vs_MS.NoTrt_F |
| STMN1    | 0.37807 | -0.3457 | 0.727 | 0.73 | 1 | MS.Trt_vs_MS.NoTrt_F |
| ZNF326   | 0.37817 | -0.5087 | 0.608 | 0.62 | 1 | MS.Trt_vs_MS.NoTrt_F |
| HMGCS1   | 0.37854 | -0.4342 | 0.558 | 0.62 | 1 | MS.Trt_vs_MS.NoTrt_F |
| FKBP2    | 0.37879 | 1.14461 | 0.137 | 0.18 | 1 | MS.Trt_vs_MS.NoTrt_F |
| UST      | 0.37897 | 0.37408 | 0.277 | 0.33 | 1 | MS.Trt_vs_MS.NoTrt_F |
| MEGF6    | 0.37914 | 1.3975  | 0.144 | 0.18 | 1 | MS.Trt_vs_MS.NoTrt_F |
| LRRC58   | 0.37938 | 0.59234 | 0.712 | 0.74 | 1 | MS.Trt_vs_MS.NoTrt_F |
| CTNNB1   | 0.38105 | 0.3378  | 0.626 | 0.72 | 1 | MS.Trt_vs_MS.NoTrt_F |
| CNN3     | 0.38134 | 0.8152  | 0.255 | 0.3  | 1 | MS.Trt_vs_MS.NoTrt_F |
| TM9SF3   | 0.38164 | 0.99025 | 0.198 | 0.24 | 1 | MS.Trt_vs_MS.NoTrt_F |
| GPR89B   | 0.38169 | 0.26254 | 0.396 | 0.44 | 1 | MS.Trt_vs_MS.NoTrt_F |
| DFFA     | 0.38207 | 0.3451  | 0.946 | 0.97 | 1 | MS.Trt_vs_MS.NoTrt_F |
| PLLP     | 0.38217 | 0.2704  | 0.939 | 0.94 | 1 | MS.Trt_vs_MS.NoTrt_F |
| GEMIN2   | 0.38247 | 0.80423 | 0.68  | 0.71 | 1 | MS.Trt_vs_MS.NoTrt_F |
| MAPKAPK5 | 0.3825  | -0.388  | 0.932 | 0.94 | 1 | MS.Trt_vs_MS.NoTrt_F |
| ZNF274   | 0.38303 | -0.2615 | 0.64  | 0.7  | 1 | MS.Trt_vs_MS.NoTrt_F |
| ALG2     | 0.38339 | 1.12961 | 0.133 | 0.17 | 1 | MS.Trt_vs_MS.NoTrt_F |
| MATN2    | 0.38351 | 0.45425 | 0.518 | 0.56 | 1 | MS.Trt_vs_MS.NoTrt_F |
| ZNF619   | 0.38387 | 0.29175 | 0.723 | 0.76 | 1 | MS.Trt_vs_MS.NoTrt_F |
| ESPL1    | 0.38391 | 0.84215 | 0.698 | 0.69 | 1 | MS.Trt_vs_MS.NoTrt_F |
| ELK4     | 0.3841  | 0.32338 | 0.543 | 0.6  | 1 | MS.Trt_vs_MS.NoTrt_F |
| CHRAC1   | 0.38433 | -0.4834 | 0.511 | 0.54 | 1 | MS.Trt_vs_MS.NoTrt_F |
| TMEM218  | 0.38439 | 0.42728 | 0.162 | 0.2  | 1 | MS.Trt_vs_MS.NoTrt_F |
| TBX6     | 0.38445 | 0.29069 | 0.46  | 0.51 | 1 | MS.Trt_vs_MS.NoTrt_F |
| TNFAIP2  | 0.38477 | 0.83134 | 0.331 | 0.39 | 1 | MS.Trt_vs_MS.NoTrt_F |
| RABL2B   | 0.38544 | -0.4059 | 0.896 | 0.91 | 1 | MS.Trt_vs_MS.NoTrt_F |
| TRIQK    | 0.38566 | 0.53685 | 0.547 | 0.5  | 1 | MS.Trt_vs_MS.NoTrt_F |
| SATB1    | 0.38577 | 1.13258 | 0.194 | 0.25 | 1 | MS.Trt_vs_MS.NoTrt_F |
| RMND5A   | 0.38578 | 1.53468 | 0.331 | 0.32 | 1 | MS.Trt_vs_MS.NoTrt_F |

|            |         |         |       |      |   |                      |
|------------|---------|---------|-------|------|---|----------------------|
| NDUFB2     | 0.3858  | 0.52815 | 0.932 | 0.95 | 1 | MS.Trt_vs_MS.NoTrt_F |
| LINC00116  | 0.38604 | 1.24485 | 0.169 | 0.21 | 1 | MS.Trt_vs_MS.NoTrt_F |
| C1orf112   | 0.38681 | 0.70964 | 0.468 | 0.55 | 1 | MS.Trt_vs_MS.NoTrt_F |
| ZFX        | 0.38689 | 0.4666  | 0.622 | 0.72 | 1 | MS.Trt_vs_MS.NoTrt_F |
| CANX       | 0.38721 | 0.28047 | 0.705 | 0.74 | 1 | MS.Trt_vs_MS.NoTrt_F |
| CYP51A1    | 0.38729 | 0.90941 | 0.46  | 0.54 | 1 | MS.Trt_vs_MS.NoTrt_F |
| C2orf88    | 0.38831 | -0.4291 | 0.335 | 0.38 | 1 | MS.Trt_vs_MS.NoTrt_F |
| CDKL1      | 0.38845 | 0.54038 | 0.651 | 0.73 | 1 | MS.Trt_vs_MS.NoTrt_F |
| EGR1       | 0.38961 | 2.57181 | 0.14  | 0.12 | 1 | MS.Trt_vs_MS.NoTrt_F |
| RP4-635E18 | 0.38972 | 0.85623 | 0.234 | 0.29 | 1 | MS.Trt_vs_MS.NoTrt_F |
| CTIF       | 0.39041 | 1.21838 | 0.248 | 0.29 | 1 | MS.Trt_vs_MS.NoTrt_F |
| USP48      | 0.39048 | 0.53838 | 0.568 | 0.62 | 1 | MS.Trt_vs_MS.NoTrt_F |
| UBE2D4     | 0.39085 | 1.13929 | 0.719 | 0.64 | 1 | MS.Trt_vs_MS.NoTrt_F |
| MAPK9      | 0.39103 | 1.33227 | 0.457 | 0.5  | 1 | MS.Trt_vs_MS.NoTrt_F |
| SLC5A10    | 0.3914  | 0.50621 | 0.101 | 0.13 | 1 | MS.Trt_vs_MS.NoTrt_F |
| APC        | 0.39154 | -0.279  | 0.522 | 0.46 | 1 | MS.Trt_vs_MS.NoTrt_F |
| SENP2      | 0.39182 | 0.39884 | 0.813 | 0.88 | 1 | MS.Trt_vs_MS.NoTrt_F |
| RABL2A     | 0.3922  | -0.3771 | 0.561 | 0.56 | 1 | MS.Trt_vs_MS.NoTrt_F |
| KIF3B      | 0.39237 | 0.35425 | 0.45  | 0.49 | 1 | MS.Trt_vs_MS.NoTrt_F |
| SOCS7      | 0.3929  | 0.66949 | 0.45  | 0.51 | 1 | MS.Trt_vs_MS.NoTrt_F |
| TMEM68     | 0.39338 | -0.3113 | 0.892 | 0.93 | 1 | MS.Trt_vs_MS.NoTrt_F |
| TMA7       | 0.39413 | 0.68531 | 0.576 | 0.79 | 1 | MS.Trt_vs_MS.NoTrt_F |
| ITGA4      | 0.39532 | 0.55865 | 0.252 | 0.3  | 1 | MS.Trt_vs_MS.NoTrt_F |
| NKAP       | 0.39558 | 0.32616 | 0.946 | 0.94 | 1 | MS.Trt_vs_MS.NoTrt_F |
| TIGAR      | 0.39563 | 0.43611 | 0.896 | 0.91 | 1 | MS.Trt_vs_MS.NoTrt_F |
| CHRNA1     | 0.39614 | 0.56513 | 0.586 | 0.6  | 1 | MS.Trt_vs_MS.NoTrt_F |
| TTC19      | 0.3963  | 0.26258 | 0.788 | 0.79 | 1 | MS.Trt_vs_MS.NoTrt_F |
| NABP2      | 0.39697 | 0.44874 | 0.529 | 0.48 | 1 | MS.Trt_vs_MS.NoTrt_F |
| TMEM144    | 0.39721 | 0.33477 | 0.209 | 0.24 | 1 | MS.Trt_vs_MS.NoTrt_F |
| ZC2HC1C    | 0.3976  | 0.29718 | 0.14  | 0.17 | 1 | MS.Trt_vs_MS.NoTrt_F |
| TP53BP1    | 0.39777 | 0.6501  | 0.32  | 0.37 | 1 | MS.Trt_vs_MS.NoTrt_F |
| FCRL3      | 0.39792 | 0.98763 | 0.291 | 0.38 | 1 | MS.Trt_vs_MS.NoTrt_F |
| SIRT3      | 0.39796 | -0.3871 | 0.367 | 0.41 | 1 | MS.Trt_vs_MS.NoTrt_F |
| MVK        | 0.3987  | 0.9632  | 0.097 | 0.13 | 1 | MS.Trt_vs_MS.NoTrt_F |
| ATP6V0A2   | 0.39911 | -0.3374 | 0.95  | 0.97 | 1 | MS.Trt_vs_MS.NoTrt_F |
| GPRIN3     | 0.39914 | 0.32226 | 0.504 | 0.56 | 1 | MS.Trt_vs_MS.NoTrt_F |
| DCAF13     | 0.39951 | 0.9696  | 0.662 | 0.72 | 1 | MS.Trt_vs_MS.NoTrt_F |
| ANK1       | 0.40006 | 1.15945 | 0.234 | 0.27 | 1 | MS.Trt_vs_MS.NoTrt_F |
| ALG8       | 0.40054 | -0.4725 | 0.489 | 0.51 | 1 | MS.Trt_vs_MS.NoTrt_F |
| PRKCD      | 0.40078 | 0.40555 | 0.489 | 0.55 | 1 | MS.Trt_vs_MS.NoTrt_F |

|           |         |         |       |      |   |                      |
|-----------|---------|---------|-------|------|---|----------------------|
| EPAS1     | 0.40356 | 2.09482 | 0.108 | 0.14 | 1 | MS.Trt_vs_MS.NoTrt_F |
| RBM6      | 0.40399 | 0.30078 | 0.871 | 0.99 | 1 | MS.Trt_vs_MS.NoTrt_F |
| SH3RF2    | 0.40447 | 0.70949 | 0.216 | 0.19 | 1 | MS.Trt_vs_MS.NoTrt_F |
| KIAA0319L | 0.40449 | -0.4389 | 0.683 | 0.75 | 1 | MS.Trt_vs_MS.NoTrt_F |
| POU5F1B   | 0.40484 | 0.36876 | 0.385 | 0.45 | 1 | MS.Trt_vs_MS.NoTrt_F |
| SGO1      | 0.40485 | 0.27561 | 0.522 | 0.59 | 1 | MS.Trt_vs_MS.NoTrt_F |
| PECR      | 0.40491 | 0.30674 | 0.691 | 0.72 | 1 | MS.Trt_vs_MS.NoTrt_F |
| EIF5      | 0.40528 | 0.55457 | 0.583 | 0.6  | 1 | MS.Trt_vs_MS.NoTrt_F |
| TUBE1     | 0.40549 | 0.66421 | 0.514 | 0.55 | 1 | MS.Trt_vs_MS.NoTrt_F |
| B9D2      | 0.4059  | 0.54369 | 0.381 | 0.43 | 1 | MS.Trt_vs_MS.NoTrt_F |
| ZNF292    | 0.40592 | 0.4998  | 0.781 | 0.83 | 1 | MS.Trt_vs_MS.NoTrt_F |
| RASAL2    | 0.40596 | 0.35728 | 0.511 | 0.56 | 1 | MS.Trt_vs_MS.NoTrt_F |
| DZANK1    | 0.40611 | 0.25767 | 0.701 | 0.7  | 1 | MS.Trt_vs_MS.NoTrt_F |
| NIPAL1    | 0.40621 | -0.4704 | 0.432 | 0.49 | 1 | MS.Trt_vs_MS.NoTrt_F |
| PQLC1     | 0.40638 | 0.50373 | 0.453 | 0.54 | 1 | MS.Trt_vs_MS.NoTrt_F |
| HPS5      | 0.40641 | -0.6559 | 0.86  | 0.82 | 1 | MS.Trt_vs_MS.NoTrt_F |
| ZNF215    | 0.40701 | 0.36364 | 0.421 | 0.5  | 1 | MS.Trt_vs_MS.NoTrt_F |
| STX2      | 0.4073  | 0.49431 | 0.478 | 0.52 | 1 | MS.Trt_vs_MS.NoTrt_F |
| CCDC157   | 0.4074  | 0.48035 | 0.665 | 0.7  | 1 | MS.Trt_vs_MS.NoTrt_F |
| SYF2      | 0.40766 | 0.37674 | 0.414 | 0.48 | 1 | MS.Trt_vs_MS.NoTrt_F |
| SERPINB9  | 0.40874 | 0.57141 | 0.799 | 0.84 | 1 | MS.Trt_vs_MS.NoTrt_F |
| RFC5      | 0.409   | 0.31116 | 0.176 | 0.21 | 1 | MS.Trt_vs_MS.NoTrt_F |
| MAP2K6    | 0.40939 | 0.4763  | 0.378 | 0.44 | 1 | MS.Trt_vs_MS.NoTrt_F |
| ZNF140    | 0.40974 | 0.84216 | 0.187 | 0.23 | 1 | MS.Trt_vs_MS.NoTrt_F |
| ANO10     | 0.41001 | -0.4779 | 0.615 | 0.66 | 1 | MS.Trt_vs_MS.NoTrt_F |
| THUMPD1   | 0.41002 | 0.25524 | 0.788 | 0.81 | 1 | MS.Trt_vs_MS.NoTrt_F |
| FAM98C    | 0.41037 | -0.2903 | 0.968 | 0.99 | 1 | MS.Trt_vs_MS.NoTrt_F |
| CASP2     | 0.41106 | 0.45868 | 0.806 | 0.89 | 1 | MS.Trt_vs_MS.NoTrt_F |
| SIPA1L1   | 0.41137 | 0.66651 | 0.576 | 0.6  | 1 | MS.Trt_vs_MS.NoTrt_F |
| MRE11A    | 0.41158 | 0.3979  | 0.752 | 0.82 | 1 | MS.Trt_vs_MS.NoTrt_F |
| EXD2      | 0.41197 | 0.44283 | 0.212 | 0.25 | 1 | MS.Trt_vs_MS.NoTrt_F |
| LAT2      | 0.41201 | 0.35418 | 0.813 | 0.88 | 1 | MS.Trt_vs_MS.NoTrt_F |
| FGF23     | 0.41208 | 0.2686  | 0.817 | 0.85 | 1 | MS.Trt_vs_MS.NoTrt_F |
| MPV17L2   | 0.41224 | 0.81233 | 0.234 | 0.28 | 1 | MS.Trt_vs_MS.NoTrt_F |
| PLXDC2    | 0.41363 | 0.3966  | 0.698 | 0.69 | 1 | MS.Trt_vs_MS.NoTrt_F |
| C14orf119 | 0.41389 | 0.31907 | 0.529 | 0.56 | 1 | MS.Trt_vs_MS.NoTrt_F |
| CHPT1     | 0.41463 | 0.80181 | 0.626 | 0.61 | 1 | MS.Trt_vs_MS.NoTrt_F |
| ZNF785    | 0.41529 | -0.339  | 0.881 | 0.93 | 1 | MS.Trt_vs_MS.NoTrt_F |
| ZNF133    | 0.4165  | -0.6665 | 0.464 | 0.43 | 1 | MS.Trt_vs_MS.NoTrt_F |
| OLFML1    | 0.41669 | 0.32118 | 0.241 | 0.28 | 1 | MS.Trt_vs_MS.NoTrt_F |

|         |         |         |       |      |                        |
|---------|---------|---------|-------|------|------------------------|
| WARS    | 0.41743 | 0.58515 | 0.295 | 0.34 | 1 MS.Trt_vs_MS.NoTrt_F |
| ZBTB25  | 0.41824 | 0.50437 | 0.975 | 0.98 | 1 MS.Trt_vs_MS.NoTrt_F |
| KCMF1   | 0.41836 | 1.34881 | 0.518 | 0.55 | 1 MS.Trt_vs_MS.NoTrt_F |
| SYT11   | 0.41847 | 0.509   | 0.604 | 0.68 | 1 MS.Trt_vs_MS.NoTrt_F |
| TAF8    | 0.41894 | -0.5097 | 0.968 | 0.97 | 1 MS.Trt_vs_MS.NoTrt_F |
| CD302   | 0.41903 | 1.10663 | 0.396 | 0.35 | 1 MS.Trt_vs_MS.NoTrt_F |
| TRMT5   | 0.42011 | -0.7106 | 0.209 | 0.23 | 1 MS.Trt_vs_MS.NoTrt_F |
| CCDC163 | 0.42047 | 0.86047 | 0.586 | 0.55 | 1 MS.Trt_vs_MS.NoTrt_F |
| HSPBAP1 | 0.42058 | 0.49936 | 0.525 | 0.57 | 1 MS.Trt_vs_MS.NoTrt_F |
| DCP1A   | 0.42088 | 0.39279 | 0.367 | 0.4  | 1 MS.Trt_vs_MS.NoTrt_F |
| ZNF613  | 0.42093 | 1.22009 | 0.36  | 0.42 | 1 MS.Trt_vs_MS.NoTrt_F |
| PPIE    | 0.42106 | 0.73592 | 0.781 | 0.82 | 1 MS.Trt_vs_MS.NoTrt_F |
| KIF22   | 0.42175 | 0.44187 | 0.198 | 0.24 | 1 MS.Trt_vs_MS.NoTrt_F |
| MTHFR   | 0.42178 | 0.72084 | 0.799 | 0.9  | 1 MS.Trt_vs_MS.NoTrt_F |
| PAAF1   | 0.42299 | -0.5029 | 0.95  | 0.99 | 1 MS.Trt_vs_MS.NoTrt_F |
| ZNF345  | 0.42303 | -0.7408 | 0.795 | 0.85 | 1 MS.Trt_vs_MS.NoTrt_F |
| CCDC152 | 0.42327 | -1.1778 | 0.237 | 0.27 | 1 MS.Trt_vs_MS.NoTrt_F |
| FAM20B  | 0.42394 | 0.35773 | 0.594 | 0.62 | 1 MS.Trt_vs_MS.NoTrt_F |
| SASH1   | 0.42424 | 0.79825 | 0.309 | 0.34 | 1 MS.Trt_vs_MS.NoTrt_F |
| PSPC1   | 0.42473 | 0.32577 | 0.335 | 0.38 | 1 MS.Trt_vs_MS.NoTrt_F |
| APOD    | 0.42509 | 1.63718 | 0.227 | 0.26 | 1 MS.Trt_vs_MS.NoTrt_F |
| F2R     | 0.42522 | 1.14925 | 0.558 | 0.56 | 1 MS.Trt_vs_MS.NoTrt_F |
| RAPGEF2 | 0.42541 | -0.7307 | 0.371 | 0.41 | 1 MS.Trt_vs_MS.NoTrt_F |
| MYO1C   | 0.42548 | 1.86467 | 0.201 | 0.25 | 1 MS.Trt_vs_MS.NoTrt_F |
| NOSTRIN | 0.42655 | 0.48841 | 0.374 | 0.35 | 1 MS.Trt_vs_MS.NoTrt_F |
| TMEM268 | 0.42678 | -0.3915 | 0.496 | 0.54 | 1 MS.Trt_vs_MS.NoTrt_F |
| ESAM    | 0.42678 | 1.20627 | 0.165 | 0.2  | 1 MS.Trt_vs_MS.NoTrt_F |
| GLRX3   | 0.42802 | 0.50681 | 0.827 | 0.85 | 1 MS.Trt_vs_MS.NoTrt_F |
| IFI6    | 0.42851 | 0.65917 | 0.374 | 0.44 | 1 MS.Trt_vs_MS.NoTrt_F |
| ZNF835  | 0.42863 | 0.44772 | 0.586 | 0.64 | 1 MS.Trt_vs_MS.NoTrt_F |
| COPS5   | 0.42958 | -0.6109 | 0.824 | 0.88 | 1 MS.Trt_vs_MS.NoTrt_F |
| CCDC88A | 0.42996 | 0.38194 | 0.658 | 0.67 | 1 MS.Trt_vs_MS.NoTrt_F |
| ZNF284  | 0.43007 | 0.5381  | 0.576 | 0.61 | 1 MS.Trt_vs_MS.NoTrt_F |
| CKAP4   | 0.43012 | 1.58578 | 0.126 | 0.16 | 1 MS.Trt_vs_MS.NoTrt_F |
| EHBP1   | 0.43015 | 0.36991 | 0.435 | 0.46 | 1 MS.Trt_vs_MS.NoTrt_F |
| NME9    | 0.43065 | 1.48373 | 0.241 | 0.29 | 1 MS.Trt_vs_MS.NoTrt_F |
| RFC2    | 0.43136 | 0.38816 | 0.665 | 0.77 | 1 MS.Trt_vs_MS.NoTrt_F |
| WIP1    | 0.43178 | 0.26154 | 0.824 | 0.89 | 1 MS.Trt_vs_MS.NoTrt_F |
| DCBLD1  | 0.43209 | -0.5549 | 0.543 | 0.58 | 1 MS.Trt_vs_MS.NoTrt_F |
| SCFD1   | 0.43247 | 0.39585 | 0.741 | 0.76 | 1 MS.Trt_vs_MS.NoTrt_F |

|          |         |         |       |      |   |                      |
|----------|---------|---------|-------|------|---|----------------------|
| ZNF208   | 0.43256 | 0.25444 | 0.845 | 0.86 | 1 | MS.Trt_vs_MS.NoTrt_F |
| ING3     | 0.43262 | 0.44398 | 0.205 | 0.24 | 1 | MS.Trt_vs_MS.NoTrt_F |
| VASH2    | 0.43492 | 0.26908 | 0.77  | 0.77 | 1 | MS.Trt_vs_MS.NoTrt_F |
| METTL25  | 0.43511 | 0.87281 | 0.205 | 0.24 | 1 | MS.Trt_vs_MS.NoTrt_F |
| PRKCE    | 0.43531 | -0.307  | 0.173 | 0.2  | 1 | MS.Trt_vs_MS.NoTrt_F |
| CINP     | 0.43582 | 0.54704 | 0.896 | 0.9  | 1 | MS.Trt_vs_MS.NoTrt_F |
| ZNF80    | 0.43646 | 0.45444 | 0.219 | 0.27 | 1 | MS.Trt_vs_MS.NoTrt_F |
| KNSTRN   | 0.43647 | 0.31033 | 0.525 | 0.5  | 1 | MS.Trt_vs_MS.NoTrt_F |
| UTP6     | 0.43884 | 0.25854 | 0.867 | 0.91 | 1 | MS.Trt_vs_MS.NoTrt_F |
| ALOX12   | 0.43906 | 0.44548 | 0.112 | 0.14 | 1 | MS.Trt_vs_MS.NoTrt_F |
| WBP2NL   | 0.43914 | 0.64758 | 0.371 | 0.43 | 1 | MS.Trt_vs_MS.NoTrt_F |
| ATG9B    | 0.43955 | 0.60328 | 0.158 | 0.19 | 1 | MS.Trt_vs_MS.NoTrt_F |
| MRS2     | 0.44018 | -0.3649 | 0.856 | 0.82 | 1 | MS.Trt_vs_MS.NoTrt_F |
| GNPNAT1  | 0.44032 | 0.84948 | 0.529 | 0.52 | 1 | MS.Trt_vs_MS.NoTrt_F |
| AVPR1A   | 0.44041 | 0.42695 | 0.223 | 0.2  | 1 | MS.Trt_vs_MS.NoTrt_F |
| P2RX5    | 0.44046 | 0.70553 | 0.133 | 0.16 | 1 | MS.Trt_vs_MS.NoTrt_F |
| UPF3A    | 0.44046 | -0.324  | 0.734 | 0.79 | 1 | MS.Trt_vs_MS.NoTrt_F |
| SRFBP1   | 0.4415  | 1.11538 | 0.464 | 0.45 | 1 | MS.Trt_vs_MS.NoTrt_F |
| AK6      | 0.44349 | 0.81553 | 0.241 | 0.28 | 1 | MS.Trt_vs_MS.NoTrt_F |
| YWHAE    | 0.44376 | 0.53177 | 0.471 | 0.61 | 1 | MS.Trt_vs_MS.NoTrt_F |
| TP53I11  | 0.44383 | 1.19578 | 0.129 | 0.16 | 1 | MS.Trt_vs_MS.NoTrt_F |
| C11orf31 | 0.44454 | 0.39145 | 0.511 | 0.57 | 1 | MS.Trt_vs_MS.NoTrt_F |
| PDXK     | 0.44541 | 0.79859 | 0.529 | 0.56 | 1 | MS.Trt_vs_MS.NoTrt_F |
| APBB2    | 0.44555 | 0.73131 | 0.335 | 0.39 | 1 | MS.Trt_vs_MS.NoTrt_F |
| ABCB10   | 0.44566 | 0.35499 | 0.129 | 0.16 | 1 | MS.Trt_vs_MS.NoTrt_F |
| CD177    | 0.44582 | 2.2992  | 0.09  | 0.12 | 1 | MS.Trt_vs_MS.NoTrt_F |
| LDHC     | 0.44725 | -0.4944 | 0.209 | 0.24 | 1 | MS.Trt_vs_MS.NoTrt_F |
| SUMF1    | 0.44822 | -0.8364 | 0.752 | 0.71 | 1 | MS.Trt_vs_MS.NoTrt_F |
| GHDC     | 0.44907 | 0.80759 | 0.284 | 0.32 | 1 | MS.Trt_vs_MS.NoTrt_F |
| UTP11    | 0.4491  | 0.76815 | 0.547 | 0.63 | 1 | MS.Trt_vs_MS.NoTrt_F |
| FAM13A   | 0.44958 | 0.72293 | 0.237 | 0.28 | 1 | MS.Trt_vs_MS.NoTrt_F |
| VTA1     | 0.44987 | 0.91417 | 0.41  | 0.46 | 1 | MS.Trt_vs_MS.NoTrt_F |
| RPL37    | 0.44996 | 0.25193 | 0.91  | 0.98 | 1 | MS.Trt_vs_MS.NoTrt_F |
| NANOS1   | 0.45021 | 0.34608 | 0.572 | 0.55 | 1 | MS.Trt_vs_MS.NoTrt_F |
| GTF3C4   | 0.45099 | 0.31272 | 0.349 | 0.4  | 1 | MS.Trt_vs_MS.NoTrt_F |
| SLC30A2  | 0.45105 | 0.29201 | 0.701 | 0.74 | 1 | MS.Trt_vs_MS.NoTrt_F |
| CCDC15   | 0.45161 | 1.05626 | 0.248 | 0.29 | 1 | MS.Trt_vs_MS.NoTrt_F |
| MTF1     | 0.45194 | -0.3082 | 0.309 | 0.35 | 1 | MS.Trt_vs_MS.NoTrt_F |
| TSPOAP1  | 0.45206 | 0.25555 | 0.255 | 0.29 | 1 | MS.Trt_vs_MS.NoTrt_F |
| EML4     | 0.45239 | 0.30408 | 0.683 | 0.82 | 1 | MS.Trt_vs_MS.NoTrt_F |

|           |         |         |       |      |   |                      |
|-----------|---------|---------|-------|------|---|----------------------|
| ARID5A    | 0.45242 | 0.84153 | 0.234 | 0.29 | 1 | MS.Trt_vs_MS.NoTrt_F |
| WDR76     | 0.45274 | 0.68144 | 0.687 | 0.74 | 1 | MS.Trt_vs_MS.NoTrt_F |
| KLF3      | 0.45403 | 0.53141 | 0.619 | 0.66 | 1 | MS.Trt_vs_MS.NoTrt_F |
| UMPS      | 0.45409 | -0.3345 | 0.676 | 0.7  | 1 | MS.Trt_vs_MS.NoTrt_F |
| CEP95     | 0.45472 | 0.61611 | 0.453 | 0.43 | 1 | MS.Trt_vs_MS.NoTrt_F |
| LINC00854 | 0.45539 | -0.67   | 0.658 | 0.73 | 1 | MS.Trt_vs_MS.NoTrt_F |
| MOCS3     | 0.45578 | -0.477  | 0.831 | 0.88 | 1 | MS.Trt_vs_MS.NoTrt_F |
| APOBEC3D  | 0.45663 | 0.38906 | 0.651 | 0.75 | 1 | MS.Trt_vs_MS.NoTrt_F |
| SPARC     | 0.45797 | 1.68624 | 0.101 | 0.13 | 1 | MS.Trt_vs_MS.NoTrt_F |
| LETM2     | 0.45844 | 0.45088 | 0.709 | 0.81 | 1 | MS.Trt_vs_MS.NoTrt_F |
| HLA-DRB4  | 0.45846 | -0.6791 | 0.119 | 0.14 | 1 | MS.Trt_vs_MS.NoTrt_F |
| THUMPD3   | 0.45846 | 0.64995 | 0.41  | 0.45 | 1 | MS.Trt_vs_MS.NoTrt_F |
| PTPN7     | 0.45847 | 0.82058 | 0.745 | 0.75 | 1 | MS.Trt_vs_MS.NoTrt_F |
| GATB      | 0.45856 | -0.5267 | 0.241 | 0.27 | 1 | MS.Trt_vs_MS.NoTrt_F |
| AKAP12    | 0.4591  | 0.29301 | 0.133 | 0.12 | 1 | MS.Trt_vs_MS.NoTrt_F |
| DAB2      | 0.45958 | 1.36043 | 0.234 | 0.27 | 1 | MS.Trt_vs_MS.NoTrt_F |
| NUDT22    | 0.45967 | 0.82115 | 0.716 | 0.71 | 1 | MS.Trt_vs_MS.NoTrt_F |
| SKP2      | 0.45968 | 0.38618 | 0.493 | 0.53 | 1 | MS.Trt_vs_MS.NoTrt_F |
| SECISBP2  | 0.4613  | 0.2724  | 0.629 | 0.66 | 1 | MS.Trt_vs_MS.NoTrt_F |
| GCM1      | 0.46152 | 0.72726 | 0.576 | 0.54 | 1 | MS.Trt_vs_MS.NoTrt_F |
| ANKRD10   | 0.46158 | 0.70956 | 0.73  | 0.8  | 1 | MS.Trt_vs_MS.NoTrt_F |
| B3GNT7    | 0.46159 | 0.71478 | 0.245 | 0.21 | 1 | MS.Trt_vs_MS.NoTrt_F |
| SENP6     | 0.46185 | 0.63675 | 0.863 | 0.93 | 1 | MS.Trt_vs_MS.NoTrt_F |
| ZPBP2     | 0.46214 | 0.25275 | 0.151 | 0.13 | 1 | MS.Trt_vs_MS.NoTrt_F |
| ZNF559    | 0.46215 | 0.33242 | 0.676 | 0.71 | 1 | MS.Trt_vs_MS.NoTrt_F |
| CD47      | 0.46236 | 0.45158 | 0.878 | 0.95 | 1 | MS.Trt_vs_MS.NoTrt_F |
| SLC25A15  | 0.46322 | -0.5071 | 0.669 | 0.7  | 1 | MS.Trt_vs_MS.NoTrt_F |
| MAF       | 0.4638  | 1.03152 | 0.385 | 0.46 | 1 | MS.Trt_vs_MS.NoTrt_F |
| NUSAP1    | 0.4667  | -0.5409 | 0.734 | 0.79 | 1 | MS.Trt_vs_MS.NoTrt_F |
| TIMM50    | 0.46734 | 0.3047  | 0.982 | 0.99 | 1 | MS.Trt_vs_MS.NoTrt_F |
| C20orf196 | 0.46735 | 0.75469 | 0.331 | 0.38 | 1 | MS.Trt_vs_MS.NoTrt_F |
| STX17     | 0.46889 | 0.27927 | 0.468 | 0.55 | 1 | MS.Trt_vs_MS.NoTrt_F |
| SPN       | 0.46901 | -0.3076 | 0.964 | 0.99 | 1 | MS.Trt_vs_MS.NoTrt_F |
| EP400NL   | 0.46991 | -0.303  | 0.766 | 0.79 | 1 | MS.Trt_vs_MS.NoTrt_F |
| ZNF780A   | 0.47023 | 0.66728 | 0.342 | 0.39 | 1 | MS.Trt_vs_MS.NoTrt_F |
| FIBP      | 0.4705  | 0.55546 | 0.471 | 0.53 | 1 | MS.Trt_vs_MS.NoTrt_F |
| ANKRD40   | 0.47234 | 0.86063 | 0.817 | 0.89 | 1 | MS.Trt_vs_MS.NoTrt_F |
| TRIM59    | 0.47263 | 0.6308  | 0.82  | 0.9  | 1 | MS.Trt_vs_MS.NoTrt_F |
| VLDLR     | 0.47273 | 1.66243 | 0.446 | 0.54 | 1 | MS.Trt_vs_MS.NoTrt_F |
| LIPT2     | 0.47282 | 0.72974 | 0.169 | 0.2  | 1 | MS.Trt_vs_MS.NoTrt_F |

|             |         |         |       |      |                        |
|-------------|---------|---------|-------|------|------------------------|
| PON2        | 0.47359 | 1.76649 | 0.417 | 0.46 | 1 MS.Trt_vs_MS.NoTrt_F |
| P3H1        | 0.4737  | 0.32213 | 0.95  | 0.98 | 1 MS.Trt_vs_MS.NoTrt_F |
| SCAF4       | 0.47385 | 0.62624 | 0.237 | 0.29 | 1 MS.Trt_vs_MS.NoTrt_F |
| PARP12      | 0.47463 | 1.21834 | 0.252 | 0.29 | 1 MS.Trt_vs_MS.NoTrt_F |
| POLE        | 0.47495 | 0.3212  | 0.831 | 0.88 | 1 MS.Trt_vs_MS.NoTrt_F |
| OCIAD1      | 0.47503 | 0.50984 | 0.676 | 0.67 | 1 MS.Trt_vs_MS.NoTrt_F |
| MGP         | 0.47558 | 1.01938 | 0.597 | 0.58 | 1 MS.Trt_vs_MS.NoTrt_F |
| NUMA1       | 0.47596 | 0.26914 | 0.853 | 0.87 | 1 MS.Trt_vs_MS.NoTrt_F |
| TMC6        | 0.47656 | 0.32813 | 0.809 | 0.86 | 1 MS.Trt_vs_MS.NoTrt_F |
| FADS2       | 0.47701 | 0.49174 | 0.525 | 0.58 | 1 MS.Trt_vs_MS.NoTrt_F |
| THAP5       | 0.4774  | 0.8211  | 0.903 | 0.93 | 1 MS.Trt_vs_MS.NoTrt_F |
| LETMD1      | 0.4791  | 0.37784 | 0.831 | 0.89 | 1 MS.Trt_vs_MS.NoTrt_F |
| STYXL1      | 0.48046 | 0.46749 | 0.324 | 0.35 | 1 MS.Trt_vs_MS.NoTrt_F |
| PER2        | 0.48056 | 0.67269 | 0.507 | 0.58 | 1 MS.Trt_vs_MS.NoTrt_F |
| LDLR        | 0.48076 | 0.28022 | 0.921 | 0.96 | 1 MS.Trt_vs_MS.NoTrt_F |
| SLC12A2     | 0.48107 | 1.43198 | 0.565 | 0.59 | 1 MS.Trt_vs_MS.NoTrt_F |
| DNAH12      | 0.48132 | 0.67638 | 0.162 | 0.14 | 1 MS.Trt_vs_MS.NoTrt_F |
| CGN         | 0.48162 | -0.3686 | 0.216 | 0.25 | 1 MS.Trt_vs_MS.NoTrt_F |
| TVP23B      | 0.48248 | -0.5155 | 0.565 | 0.58 | 1 MS.Trt_vs_MS.NoTrt_F |
| BOLA3       | 0.48261 | 0.63892 | 0.518 | 0.58 | 1 MS.Trt_vs_MS.NoTrt_F |
| PCOLCE      | 0.48272 | -0.2877 | 0.104 | 0.13 | 1 MS.Trt_vs_MS.NoTrt_F |
| HINT3       | 0.48355 | -0.2607 | 0.309 | 0.35 | 1 MS.Trt_vs_MS.NoTrt_F |
| ARHGEF26    | 0.48384 | 0.63812 | 0.486 | 0.53 | 1 MS.Trt_vs_MS.NoTrt_F |
| AK9         | 0.48417 | 0.78056 | 0.658 | 0.76 | 1 MS.Trt_vs_MS.NoTrt_F |
| UAP1L1      | 0.48444 | 0.95325 | 0.374 | 0.36 | 1 MS.Trt_vs_MS.NoTrt_F |
| DCAF11      | 0.48522 | -0.4324 | 0.737 | 0.85 | 1 MS.Trt_vs_MS.NoTrt_F |
| ZFP14       | 0.48625 | 0.29036 | 0.827 | 0.9  | 1 MS.Trt_vs_MS.NoTrt_F |
| ZNF827      | 0.4865  | 1.32181 | 0.083 | 0.11 | 1 MS.Trt_vs_MS.NoTrt_F |
| CH507-9B2.1 | 0.48688 | 0.35356 | 0.464 | 0.54 | 1 MS.Trt_vs_MS.NoTrt_F |
| PPIC        | 0.48703 | -0.5114 | 0.086 | 0.11 | 1 MS.Trt_vs_MS.NoTrt_F |
| VASH1       | 0.48708 | 0.50062 | 0.094 | 0.12 | 1 MS.Trt_vs_MS.NoTrt_F |
| LINC00961   | 0.48769 | 0.31017 | 0.36  | 0.39 | 1 MS.Trt_vs_MS.NoTrt_F |
| ARL2        | 0.48776 | 0.30377 | 0.788 | 0.83 | 1 MS.Trt_vs_MS.NoTrt_F |
| MCRIP2      | 0.48861 | 0.26106 | 0.561 | 0.59 | 1 MS.Trt_vs_MS.NoTrt_F |
| TRAPPC4     | 0.48879 | 0.43362 | 0.899 | 0.9  | 1 MS.Trt_vs_MS.NoTrt_F |
| SIDT1       | 0.48912 | 0.32149 | 0.741 | 0.8  | 1 MS.Trt_vs_MS.NoTrt_F |
| MRPS16      | 0.48941 | 0.25178 | 0.802 | 0.83 | 1 MS.Trt_vs_MS.NoTrt_F |
| PDCD6       | 0.48993 | 0.29081 | 0.673 | 0.69 | 1 MS.Trt_vs_MS.NoTrt_F |
| GALK1       | 0.49015 | 0.88187 | 0.284 | 0.33 | 1 MS.Trt_vs_MS.NoTrt_F |
| CRB1        | 0.49056 | 0.5788  | 0.162 | 0.19 | 1 MS.Trt_vs_MS.NoTrt_F |



|          |         |         |       |      |   |                      |
|----------|---------|---------|-------|------|---|----------------------|
| TMEM97   | 0.491   | 1.23217 | 0.281 | 0.31 | 1 | MS.Trt_vs_MS.NoTrt_F |
| ESRP1    | 0.4914  | 0.75086 | 0.223 | 0.2  | 1 | MS.Trt_vs_MS.NoTrt_F |
| ICMT     | 0.49197 | -1.1248 | 0.651 | 0.66 | 1 | MS.Trt_vs_MS.NoTrt_F |
| STARD4   | 0.49218 | 1.37128 | 0.165 | 0.19 | 1 | MS.Trt_vs_MS.NoTrt_F |
| FKRP     | 0.49224 | 0.31286 | 0.651 | 0.69 | 1 | MS.Trt_vs_MS.NoTrt_F |
| MRPL40   | 0.49326 | 0.45094 | 0.453 | 0.47 | 1 | MS.Trt_vs_MS.NoTrt_F |
| PPM1F    | 0.49352 | -0.5543 | 0.763 | 0.8  | 1 | MS.Trt_vs_MS.NoTrt_F |
| ARHGAP26 | 0.4936  | 0.51297 | 0.68  | 0.68 | 1 | MS.Trt_vs_MS.NoTrt_F |
| ACAA2    | 0.4943  | 0.32702 | 0.558 | 0.6  | 1 | MS.Trt_vs_MS.NoTrt_F |
| ZNF286B  | 0.49455 | 1.32001 | 0.468 | 0.53 | 1 | MS.Trt_vs_MS.NoTrt_F |
| FAM210A  | 0.49468 | -0.2585 | 0.327 | 0.4  | 1 | MS.Trt_vs_MS.NoTrt_F |
| FOXRED1  | 0.49505 | -0.544  | 0.482 | 0.52 | 1 | MS.Trt_vs_MS.NoTrt_F |
| ZADH2    | 0.49523 | 1.3178  | 0.817 | 0.83 | 1 | MS.Trt_vs_MS.NoTrt_F |
| ANKRD54  | 0.49644 | 0.66141 | 0.676 | 0.8  | 1 | MS.Trt_vs_MS.NoTrt_F |
| SYNE4    | 0.49656 | 0.78494 | 0.5   | 0.53 | 1 | MS.Trt_vs_MS.NoTrt_F |
| QTRT2    | 0.49695 | 0.52635 | 0.73  | 0.75 | 1 | MS.Trt_vs_MS.NoTrt_F |
| MPST     | 0.49705 | 0.43764 | 0.82  | 0.9  | 1 | MS.Trt_vs_MS.NoTrt_F |
| CNBD2    | 0.49736 | 0.38834 | 0.439 | 0.49 | 1 | MS.Trt_vs_MS.NoTrt_F |
| KIAA0513 | 0.49743 | 0.55644 | 0.608 | 0.64 | 1 | MS.Trt_vs_MS.NoTrt_F |
| SERPINB6 | 0.49774 | 1.32778 | 0.486 | 0.56 | 1 | MS.Trt_vs_MS.NoTrt_F |
| ZNF250   | 0.49839 | 1.12628 | 0.59  | 0.64 | 1 | MS.Trt_vs_MS.NoTrt_F |
| BRD8     | 0.49905 | -0.3196 | 0.763 | 0.77 | 1 | MS.Trt_vs_MS.NoTrt_F |
| VMAC     | 0.49918 | -0.4141 | 0.626 | 0.65 | 1 | MS.Trt_vs_MS.NoTrt_F |
| GTPBP2   | 0.49936 | 0.75416 | 0.626 | 0.61 | 1 | MS.Trt_vs_MS.NoTrt_F |
| SLC15A2  | 0.4997  | 0.53017 | 0.486 | 0.55 | 1 | MS.Trt_vs_MS.NoTrt_F |
| MFAP5    | 0.4997  | -0.2853 | 0.32  | 0.34 | 1 | MS.Trt_vs_MS.NoTrt_F |
| EVI5     | 0.50004 | -0.285  | 0.791 | 0.87 | 1 | MS.Trt_vs_MS.NoTrt_F |
| RDH10    | 0.50178 | -0.6489 | 0.223 | 0.25 | 1 | MS.Trt_vs_MS.NoTrt_F |
| NEDD1    | 0.50232 | 0.97421 | 0.162 | 0.2  | 1 | MS.Trt_vs_MS.NoTrt_F |
| PLEKHG5  | 0.50298 | 1.48619 | 0.162 | 0.19 | 1 | MS.Trt_vs_MS.NoTrt_F |
| VWA5B1   | 0.50351 | 0.30743 | 0.594 | 0.62 | 1 | MS.Trt_vs_MS.NoTrt_F |
| TMEM143  | 0.50369 | 0.84922 | 0.482 | 0.55 | 1 | MS.Trt_vs_MS.NoTrt_F |
| TTC38    | 0.50389 | 0.59817 | 0.529 | 0.52 | 1 | MS.Trt_vs_MS.NoTrt_F |
| ZNF157   | 0.50509 | -0.2984 | 0.752 | 0.83 | 1 | MS.Trt_vs_MS.NoTrt_F |
| ZNF761   | 0.50557 | 1.02001 | 0.73  | 0.78 | 1 | MS.Trt_vs_MS.NoTrt_F |
| SYK      | 0.50608 | 0.41402 | 0.442 | 0.45 | 1 | MS.Trt_vs_MS.NoTrt_F |
| CD160    | 0.50678 | 1.29639 | 0.266 | 0.32 | 1 | MS.Trt_vs_MS.NoTrt_F |
| FAM217B  | 0.50701 | 0.52604 | 0.385 | 0.43 | 1 | MS.Trt_vs_MS.NoTrt_F |
| CBS      | 0.50724 | 0.63189 | 0.241 | 0.23 | 1 | MS.Trt_vs_MS.NoTrt_F |
| ZKSCAN3  | 0.50782 | 0.56909 | 0.838 | 0.89 | 1 | MS.Trt_vs_MS.NoTrt_F |

|            |         |         |       |      |   |                      |
|------------|---------|---------|-------|------|---|----------------------|
| PAX5       | 0.50856 | 0.74886 | 0.133 | 0.16 | 1 | MS.Trt_vs_MS.NoTrt_F |
| SLC39A7    | 0.50903 | 0.75192 | 0.133 | 0.16 | 1 | MS.Trt_vs_MS.NoTrt_F |
| CCHCR1     | 0.50908 | -1.0928 | 0.349 | 0.37 | 1 | MS.Trt_vs_MS.NoTrt_F |
| FABP4      | 0.50954 | 1.37628 | 0.169 | 0.2  | 1 | MS.Trt_vs_MS.NoTrt_F |
| SAMD4A     | 0.5099  | 0.39006 | 0.59  | 0.65 | 1 | MS.Trt_vs_MS.NoTrt_F |
| DYNC1H1    | 0.51019 | 0.55433 | 0.942 | 0.93 | 1 | MS.Trt_vs_MS.NoTrt_F |
| EIF4G2     | 0.51036 | 0.29707 | 0.601 | 0.71 | 1 | MS.Trt_vs_MS.NoTrt_F |
| ZNF280C    | 0.51076 | -0.5489 | 0.291 | 0.32 | 1 | MS.Trt_vs_MS.NoTrt_F |
| CBLB       | 0.51123 | 0.89647 | 0.414 | 0.4  | 1 | MS.Trt_vs_MS.NoTrt_F |
| TNFRSF10B  | 0.51133 | 0.63243 | 0.46  | 0.51 | 1 | MS.Trt_vs_MS.NoTrt_F |
| R3HDM2     | 0.51138 | 0.71253 | 0.763 | 0.81 | 1 | MS.Trt_vs_MS.NoTrt_F |
| RBMS1      | 0.51151 | 0.97997 | 0.608 | 0.71 | 1 | MS.Trt_vs_MS.NoTrt_F |
| TPX2       | 0.51209 | 0.79679 | 0.23  | 0.27 | 1 | MS.Trt_vs_MS.NoTrt_F |
| TBC1D10B   | 0.5127  | 0.45169 | 0.723 | 0.73 | 1 | MS.Trt_vs_MS.NoTrt_F |
| WNK3       | 0.51278 | -0.4569 | 0.302 | 0.34 | 1 | MS.Trt_vs_MS.NoTrt_F |
| SYS1       | 0.51285 | 0.74516 | 0.475 | 0.46 | 1 | MS.Trt_vs_MS.NoTrt_F |
| FAM220A    | 0.51291 | -0.7475 | 0.342 | 0.38 | 1 | MS.Trt_vs_MS.NoTrt_F |
| STX8       | 0.5136  | 0.40428 | 0.835 | 0.87 | 1 | MS.Trt_vs_MS.NoTrt_F |
| GNB4       | 0.51423 | 0.29289 | 0.809 | 0.84 | 1 | MS.Trt_vs_MS.NoTrt_F |
| GMCL1      | 0.51444 | 0.94923 | 0.356 | 0.38 | 1 | MS.Trt_vs_MS.NoTrt_F |
| GOLGA3     | 0.51459 | 0.50539 | 0.799 | 0.81 | 1 | MS.Trt_vs_MS.NoTrt_F |
| GFRAL      | 0.5148  | 0.33683 | 0.392 | 0.39 | 1 | MS.Trt_vs_MS.NoTrt_F |
| PICK1      | 0.5156  | 0.27833 | 0.46  | 0.5  | 1 | MS.Trt_vs_MS.NoTrt_F |
| GAN        | 0.51569 | 0.28405 | 0.838 | 0.85 | 1 | MS.Trt_vs_MS.NoTrt_F |
| PPP5D1     | 0.51631 | 0.49512 | 0.748 | 0.75 | 1 | MS.Trt_vs_MS.NoTrt_F |
| IFNAR1     | 0.51684 | 1.03139 | 0.504 | 0.51 | 1 | MS.Trt_vs_MS.NoTrt_F |
| UTP15      | 0.51755 | -0.8778 | 0.363 | 0.39 | 1 | MS.Trt_vs_MS.NoTrt_F |
| HSPA13     | 0.51758 | 0.41218 | 0.09  | 0.11 | 1 | MS.Trt_vs_MS.NoTrt_F |
| PEX2       | 0.51795 | -0.2531 | 0.601 | 0.6  | 1 | MS.Trt_vs_MS.NoTrt_F |
| VAPA       | 0.51925 | 0.29801 | 0.716 | 0.77 | 1 | MS.Trt_vs_MS.NoTrt_F |
| C16orf52   | 0.52289 | 0.73254 | 0.094 | 0.12 | 1 | MS.Trt_vs_MS.NoTrt_F |
| SLC36A4    | 0.52317 | -0.5605 | 0.104 | 0.13 | 1 | MS.Trt_vs_MS.NoTrt_F |
| RP11-505K9 | 0.52327 | 0.34253 | 0.108 | 0.13 | 1 | MS.Trt_vs_MS.NoTrt_F |
| CCDC142    | 0.52354 | 0.32643 | 0.579 | 0.61 | 1 | MS.Trt_vs_MS.NoTrt_F |
| SERINC5    | 0.5244  | 0.47422 | 0.896 | 0.95 | 1 | MS.Trt_vs_MS.NoTrt_F |
| RAB11FIP1  | 0.5246  | 0.50486 | 0.86  | 0.83 | 1 | MS.Trt_vs_MS.NoTrt_F |
| ASRGL1     | 0.52496 | 0.4859  | 0.54  | 0.63 | 1 | MS.Trt_vs_MS.NoTrt_F |
| LRRC37A    | 0.52558 | 0.38371 | 0.399 | 0.45 | 1 | MS.Trt_vs_MS.NoTrt_F |
| DENR       | 0.52574 | 0.40636 | 0.73  | 0.77 | 1 | MS.Trt_vs_MS.NoTrt_F |
| LYRM4      | 0.52607 | -0.3174 | 0.942 | 0.98 | 1 | MS.Trt_vs_MS.NoTrt_F |

|          |         |         |       |      |   |                      |
|----------|---------|---------|-------|------|---|----------------------|
| RBM45    | 0.52658 | 1.04847 | 0.126 | 0.16 | 1 | MS.Trt_vs_MS.NoTrt_F |
| DLK2     | 0.52713 | 0.57093 | 0.363 | 0.4  | 1 | MS.Trt_vs_MS.NoTrt_F |
| GBA2     | 0.52729 | 0.3606  | 0.694 | 0.61 | 1 | MS.Trt_vs_MS.NoTrt_F |
| ST8SIA1  | 0.52756 | 0.82592 | 0.604 | 0.64 | 1 | MS.Trt_vs_MS.NoTrt_F |
| COL1A2   | 0.52826 | 0.26071 | 0.392 | 0.44 | 1 | MS.Trt_vs_MS.NoTrt_F |
| ZNF574   | 0.52844 | 0.25063 | 0.392 | 0.39 | 1 | MS.Trt_vs_MS.NoTrt_F |
| IL23R    | 0.52954 | -1.4898 | 0.388 | 0.4  | 1 | MS.Trt_vs_MS.NoTrt_F |
| CLU      | 0.53072 | 1.29462 | 0.547 | 0.6  | 1 | MS.Trt_vs_MS.NoTrt_F |
| TMEM231  | 0.5311  | 0.56842 | 0.766 | 0.82 | 1 | MS.Trt_vs_MS.NoTrt_F |
| HEXDC    | 0.53167 | 0.55348 | 0.371 | 0.4  | 1 | MS.Trt_vs_MS.NoTrt_F |
| IDO1     | 0.53239 | 0.29442 | 0.532 | 0.54 | 1 | MS.Trt_vs_MS.NoTrt_F |
| CDK4     | 0.53246 | 1.04788 | 0.558 | 0.64 | 1 | MS.Trt_vs_MS.NoTrt_F |
| GALNT11  | 0.53254 | 0.32352 | 0.468 | 0.44 | 1 | MS.Trt_vs_MS.NoTrt_F |
| ZNF547   | 0.53276 | 1.47398 | 0.295 | 0.29 | 1 | MS.Trt_vs_MS.NoTrt_F |
| ERLIN2   | 0.53352 | 0.34175 | 0.385 | 0.42 | 1 | MS.Trt_vs_MS.NoTrt_F |
| SLC35A3  | 0.53374 | -0.2586 | 0.82  | 0.82 | 1 | MS.Trt_vs_MS.NoTrt_F |
| METTL15  | 0.53394 | -0.2714 | 0.414 | 0.42 | 1 | MS.Trt_vs_MS.NoTrt_F |
| NFKBIA   | 0.53399 | 0.84208 | 0.309 | 0.38 | 1 | MS.Trt_vs_MS.NoTrt_F |
| PSIP1    | 0.5341  | 0.34331 | 0.759 | 0.82 | 1 | MS.Trt_vs_MS.NoTrt_F |
| C12orf57 | 0.53431 | 0.38498 | 0.403 | 0.41 | 1 | MS.Trt_vs_MS.NoTrt_F |
| L3MBTL1  | 0.53438 | 0.41842 | 0.651 | 0.65 | 1 | MS.Trt_vs_MS.NoTrt_F |
| SLAMF7   | 0.5346  | 1.29653 | 0.381 | 0.46 | 1 | MS.Trt_vs_MS.NoTrt_F |
| POFUT1   | 0.53513 | 0.67371 | 0.554 | 0.6  | 1 | MS.Trt_vs_MS.NoTrt_F |
| TRIM16   | 0.53573 | 0.26581 | 0.468 | 0.49 | 1 | MS.Trt_vs_MS.NoTrt_F |
| SEPSECS  | 0.53577 | -0.4184 | 0.759 | 0.79 | 1 | MS.Trt_vs_MS.NoTrt_F |
| SPAG9    | 0.53652 | -0.4287 | 0.878 | 0.91 | 1 | MS.Trt_vs_MS.NoTrt_F |
| E2F6     | 0.53761 | -1.0754 | 0.309 | 0.34 | 1 | MS.Trt_vs_MS.NoTrt_F |
| ELAC1    | 0.53835 | -0.5981 | 0.547 | 0.58 | 1 | MS.Trt_vs_MS.NoTrt_F |
| PRCP     | 0.53955 | 0.84021 | 0.845 | 0.79 | 1 | MS.Trt_vs_MS.NoTrt_F |
| PIGA     | 0.5398  | -0.2544 | 0.457 | 0.51 | 1 | MS.Trt_vs_MS.NoTrt_F |
| PLPP2    | 0.54085 | 0.61322 | 0.914 | 0.87 | 1 | MS.Trt_vs_MS.NoTrt_F |
| TONSL    | 0.54143 | 0.7427  | 0.622 | 0.66 | 1 | MS.Trt_vs_MS.NoTrt_F |
| FAM3A    | 0.54196 | 0.44614 | 0.791 | 0.8  | 1 | MS.Trt_vs_MS.NoTrt_F |
| SLC35G2  | 0.54248 | 0.7875  | 0.219 | 0.25 | 1 | MS.Trt_vs_MS.NoTrt_F |
| KIFC3    | 0.54255 | 0.2955  | 0.576 | 0.67 | 1 | MS.Trt_vs_MS.NoTrt_F |
| RBPM5    | 0.54257 | 1.4488  | 0.155 | 0.14 | 1 | MS.Trt_vs_MS.NoTrt_F |
| PITPNM2  | 0.54355 | 0.7755  | 0.414 | 0.48 | 1 | MS.Trt_vs_MS.NoTrt_F |
| RPUSD2   | 0.54377 | 0.72263 | 0.155 | 0.18 | 1 | MS.Trt_vs_MS.NoTrt_F |
| CEP41    | 0.54394 | -0.261  | 0.781 | 0.82 | 1 | MS.Trt_vs_MS.NoTrt_F |
| SPRYD4   | 0.54437 | 0.50307 | 0.856 | 0.93 | 1 | MS.Trt_vs_MS.NoTrt_F |

|            |         |         |       |      |                        |
|------------|---------|---------|-------|------|------------------------|
| CFD        | 0.5445  | 0.53298 | 0.223 | 0.24 | 1 MS.Trt_vs_MS.NoTrt_F |
| GOT2       | 0.54453 | 0.3327  | 0.86  | 0.81 | 1 MS.Trt_vs_MS.NoTrt_F |
| OCLN       | 0.54516 | 0.55336 | 0.781 | 0.82 | 1 MS.Trt_vs_MS.NoTrt_F |
| VNN2       | 0.5453  | 1.80533 | 0.223 | 0.2  | 1 MS.Trt_vs_MS.NoTrt_F |
| BLOC1S4    | 0.54693 | 0.40538 | 0.205 | 0.23 | 1 MS.Trt_vs_MS.NoTrt_F |
| PTPRF      | 0.54749 | 0.31146 | 0.356 | 0.36 | 1 MS.Trt_vs_MS.NoTrt_F |
| COMMD4     | 0.5476  | 0.37996 | 0.906 | 0.95 | 1 MS.Trt_vs_MS.NoTrt_F |
| AC016577.1 | 0.54769 | 0.27216 | 0.417 | 0.5  | 1 MS.Trt_vs_MS.NoTrt_F |
| WWTR1      | 0.5477  | 0.57429 | 0.468 | 0.52 | 1 MS.Trt_vs_MS.NoTrt_F |
| NUCKS1     | 0.54835 | 0.89499 | 0.522 | 0.6  | 1 MS.Trt_vs_MS.NoTrt_F |
| ALDH1B1    | 0.54883 | 0.28582 | 0.626 | 0.67 | 1 MS.Trt_vs_MS.NoTrt_F |
| GLT8D1     | 0.54965 | 0.3127  | 0.302 | 0.33 | 1 MS.Trt_vs_MS.NoTrt_F |
| MUC20      | 0.5497  | -0.3662 | 0.543 | 0.59 | 1 MS.Trt_vs_MS.NoTrt_F |
| CCDC90B    | 0.55065 | 0.39574 | 0.906 | 0.95 | 1 MS.Trt_vs_MS.NoTrt_F |
| ST7L       | 0.55114 | 0.43652 | 0.457 | 0.48 | 1 MS.Trt_vs_MS.NoTrt_F |
| COG1       | 0.55173 | -0.3374 | 0.853 | 0.85 | 1 MS.Trt_vs_MS.NoTrt_F |
| PRKAR2A    | 0.55208 | -0.5709 | 0.867 | 0.93 | 1 MS.Trt_vs_MS.NoTrt_F |
| IVD        | 0.55218 | 0.32395 | 0.935 | 0.93 | 1 MS.Trt_vs_MS.NoTrt_F |
| YES1       | 0.55269 | 0.26138 | 0.367 | 0.41 | 1 MS.Trt_vs_MS.NoTrt_F |
| FABP2      | 0.55273 | 0.35629 | 0.421 | 0.44 | 1 MS.Trt_vs_MS.NoTrt_F |
| TIE1       | 0.55327 | 0.7335  | 0.615 | 0.59 | 1 MS.Trt_vs_MS.NoTrt_F |
| ORC2       | 0.55439 | 0.39415 | 0.673 | 0.73 | 1 MS.Trt_vs_MS.NoTrt_F |
| TCEANC     | 0.55449 | -0.3741 | 0.651 | 0.67 | 1 MS.Trt_vs_MS.NoTrt_F |
| NME4       | 0.55512 | 0.29151 | 0.176 | 0.2  | 1 MS.Trt_vs_MS.NoTrt_F |
| COQ10A     | 0.5555  | -0.8386 | 0.543 | 0.54 | 1 MS.Trt_vs_MS.NoTrt_F |
| TMEM71     | 0.55678 | 1.00179 | 0.119 | 0.14 | 1 MS.Trt_vs_MS.NoTrt_F |
| KATNBL1    | 0.55679 | 0.57668 | 0.917 | 0.92 | 1 MS.Trt_vs_MS.NoTrt_F |
| SEC31B     | 0.55744 | 0.45667 | 0.435 | 0.49 | 1 MS.Trt_vs_MS.NoTrt_F |
| WDR13      | 0.55864 | 0.32554 | 0.813 | 0.87 | 1 MS.Trt_vs_MS.NoTrt_F |
| ASB2       | 0.55881 | 1.46826 | 0.104 | 0.13 | 1 MS.Trt_vs_MS.NoTrt_F |
| ZNF160     | 0.55885 | 0.58293 | 0.536 | 0.59 | 1 MS.Trt_vs_MS.NoTrt_F |
| LIN7B      | 0.55937 | -0.2981 | 0.327 | 0.37 | 1 MS.Trt_vs_MS.NoTrt_F |
| PAPOLG     | 0.55951 | 1.05683 | 0.73  | 0.8  | 1 MS.Trt_vs_MS.NoTrt_F |
| AGPAT3     | 0.55967 | 0.34021 | 0.655 | 0.68 | 1 MS.Trt_vs_MS.NoTrt_F |
| TNRC6B     | 0.55969 | 0.26207 | 0.96  | 0.98 | 1 MS.Trt_vs_MS.NoTrt_F |
| GBA        | 0.55972 | -0.3679 | 0.482 | 0.5  | 1 MS.Trt_vs_MS.NoTrt_F |
| GPR107     | 0.55987 | 0.40782 | 0.209 | 0.23 | 1 MS.Trt_vs_MS.NoTrt_F |
| CTD-3088G3 | 0.56079 | -0.4169 | 0.5   | 0.56 | 1 MS.Trt_vs_MS.NoTrt_F |
| EXOC8      | 0.56165 | 0.25809 | 0.406 | 0.46 | 1 MS.Trt_vs_MS.NoTrt_F |
| CFI        | 0.56172 | 0.25358 | 0.561 | 0.61 | 1 MS.Trt_vs_MS.NoTrt_F |

|          |         |         |       |      |                        |
|----------|---------|---------|-------|------|------------------------|
| LRRC1    | 0.56184 | 0.57448 | 0.317 | 0.35 | 1 MS.Trt_vs_MS.NoTrt_F |
| SLC39A11 | 0.56227 | 1.0907  | 0.32  | 0.38 | 1 MS.Trt_vs_MS.NoTrt_F |
| CPT1A    | 0.56328 | 0.61837 | 0.68  | 0.7  | 1 MS.Trt_vs_MS.NoTrt_F |
| CHRNA3   | 0.56358 | -0.3113 | 0.223 | 0.24 | 1 MS.Trt_vs_MS.NoTrt_F |
| RBBP5    | 0.56376 | 0.8746  | 0.568 | 0.63 | 1 MS.Trt_vs_MS.NoTrt_F |
| STRN3    | 0.5669  | 0.61111 | 0.831 | 0.83 | 1 MS.Trt_vs_MS.NoTrt_F |
| SLC31A2  | 0.5676  | 1.73928 | 0.133 | 0.16 | 1 MS.Trt_vs_MS.NoTrt_F |
| CHST14   | 0.56863 | 0.92    | 0.245 | 0.28 | 1 MS.Trt_vs_MS.NoTrt_F |
| GNE      | 0.56922 | 0.69642 | 0.227 | 0.27 | 1 MS.Trt_vs_MS.NoTrt_F |
| LRP12    | 0.56993 | 0.38777 | 0.604 | 0.67 | 1 MS.Trt_vs_MS.NoTrt_F |
| ZSCAN20  | 0.57004 | 0.97959 | 0.302 | 0.32 | 1 MS.Trt_vs_MS.NoTrt_F |
| TMTC3    | 0.5715  | 1.17103 | 0.241 | 0.28 | 1 MS.Trt_vs_MS.NoTrt_F |
| SLFN13   | 0.57215 | 1.5951  | 0.626 | 0.67 | 1 MS.Trt_vs_MS.NoTrt_F |
| PXMP4    | 0.5722  | 0.27525 | 0.849 | 0.87 | 1 MS.Trt_vs_MS.NoTrt_F |
| THEMIS   | 0.57329 | 1.04835 | 0.277 | 0.31 | 1 MS.Trt_vs_MS.NoTrt_F |
| DHRS3    | 0.57429 | 2.01865 | 0.252 | 0.25 | 1 MS.Trt_vs_MS.NoTrt_F |
| ZNF230   | 0.57494 | 0.44572 | 0.572 | 0.62 | 1 MS.Trt_vs_MS.NoTrt_F |
| CA5B     | 0.57538 | 0.39397 | 0.838 | 0.9  | 1 MS.Trt_vs_MS.NoTrt_F |
| DIEXF    | 0.57568 | 0.55841 | 0.525 | 0.49 | 1 MS.Trt_vs_MS.NoTrt_F |
| ACTR3B   | 0.57606 | 0.29791 | 0.496 | 0.5  | 1 MS.Trt_vs_MS.NoTrt_F |
| FAM184B  | 0.57618 | -0.3514 | 0.155 | 0.18 | 1 MS.Trt_vs_MS.NoTrt_F |
| BCAS4    | 0.57659 | -0.3547 | 0.935 | 0.96 | 1 MS.Trt_vs_MS.NoTrt_F |
| DRAM2    | 0.5766  | 0.97664 | 0.209 | 0.2  | 1 MS.Trt_vs_MS.NoTrt_F |
| ZNF174   | 0.57681 | 2.52733 | 0.086 | 0.11 | 1 MS.Trt_vs_MS.NoTrt_F |
| CASP9    | 0.57789 | 0.28943 | 0.374 | 0.4  | 1 MS.Trt_vs_MS.NoTrt_F |
| PQLC2    | 0.57805 | -0.3677 | 0.403 | 0.45 | 1 MS.Trt_vs_MS.NoTrt_F |
| CYB5D1   | 0.57841 | -1.2978 | 0.187 | 0.21 | 1 MS.Trt_vs_MS.NoTrt_F |
| NEDD4L   | 0.57848 | -0.9385 | 0.532 | 0.46 | 1 MS.Trt_vs_MS.NoTrt_F |
| ABCB7    | 0.57918 | -0.316  | 0.705 | 0.72 | 1 MS.Trt_vs_MS.NoTrt_F |
| SGPL1    | 0.57973 | 0.36159 | 0.511 | 0.52 | 1 MS.Trt_vs_MS.NoTrt_F |
| MKLN1    | 0.58046 | 0.76218 | 0.576 | 0.66 | 1 MS.Trt_vs_MS.NoTrt_F |
| TBL1X    | 0.5807  | -0.6263 | 0.576 | 0.6  | 1 MS.Trt_vs_MS.NoTrt_F |
| APP      | 0.58193 | 0.89627 | 0.629 | 0.72 | 1 MS.Trt_vs_MS.NoTrt_F |
| MTSS1    | 0.58239 | 1.13458 | 0.59  | 0.67 | 1 MS.Trt_vs_MS.NoTrt_F |
| CORO2A   | 0.585   | 0.36659 | 0.795 | 0.78 | 1 MS.Trt_vs_MS.NoTrt_F |
| C21orf59 | 0.58508 | 0.48426 | 0.442 | 0.45 | 1 MS.Trt_vs_MS.NoTrt_F |
| ZNF813   | 0.58514 | 0.97575 | 0.773 | 0.77 | 1 MS.Trt_vs_MS.NoTrt_F |
| CD24     | 0.58519 | 0.29246 | 0.41  | 0.41 | 1 MS.Trt_vs_MS.NoTrt_F |
| CRK      | 0.58534 | 0.46047 | 0.626 | 0.69 | 1 MS.Trt_vs_MS.NoTrt_F |
| PAN2     | 0.58591 | 0.78065 | 0.367 | 0.4  | 1 MS.Trt_vs_MS.NoTrt_F |

|          |         |         |       |      |   |                      |
|----------|---------|---------|-------|------|---|----------------------|
| IRAK2    | 0.58601 | -0.3783 | 0.353 | 0.38 | 1 | MS.Trt_vs_MS.NoTrt_F |
| FBXL22   | 0.58646 | 0.61936 | 0.14  | 0.16 | 1 | MS.Trt_vs_MS.NoTrt_F |
| BTBD8    | 0.58647 | 0.49453 | 0.32  | 0.36 | 1 | MS.Trt_vs_MS.NoTrt_F |
| EVI5L    | 0.58659 | 0.2753  | 0.306 | 0.34 | 1 | MS.Trt_vs_MS.NoTrt_F |
| FAM208A  | 0.58704 | 0.74607 | 0.737 | 0.73 | 1 | MS.Trt_vs_MS.NoTrt_F |
| BRPF3    | 0.58724 | 2.24241 | 0.101 | 0.12 | 1 | MS.Trt_vs_MS.NoTrt_F |
| CASC10   | 0.58731 | 0.25049 | 0.446 | 0.42 | 1 | MS.Trt_vs_MS.NoTrt_F |
| UIMC1    | 0.58778 | -0.4335 | 0.835 | 0.86 | 1 | MS.Trt_vs_MS.NoTrt_F |
| GNAS     | 0.58943 | 0.75802 | 0.511 | 0.57 | 1 | MS.Trt_vs_MS.NoTrt_F |
| AKT3     | 0.58954 | 0.36178 | 0.712 | 0.76 | 1 | MS.Trt_vs_MS.NoTrt_F |
| IGFL2    | 0.58956 | 0.42512 | 0.399 | 0.47 | 1 | MS.Trt_vs_MS.NoTrt_F |
| ZNF778   | 0.5901  | 0.36564 | 0.637 | 0.66 | 1 | MS.Trt_vs_MS.NoTrt_F |
| POGZ     | 0.59096 | 0.51509 | 0.856 | 0.86 | 1 | MS.Trt_vs_MS.NoTrt_F |
| LAMA5    | 0.59136 | 1.06148 | 0.277 | 0.32 | 1 | MS.Trt_vs_MS.NoTrt_F |
| FAU      | 0.59239 | 0.26109 | 0.727 | 0.94 | 1 | MS.Trt_vs_MS.NoTrt_F |
| C11orf63 | 0.59259 | 0.51069 | 0.475 | 0.51 | 1 | MS.Trt_vs_MS.NoTrt_F |
| KLHDC2   | 0.59295 | 1.11961 | 0.27  | 0.3  | 1 | MS.Trt_vs_MS.NoTrt_F |
| GTF2IRD1 | 0.59435 | 0.25599 | 0.701 | 0.72 | 1 | MS.Trt_vs_MS.NoTrt_F |
| ZNF577   | 0.59447 | 0.88398 | 0.381 | 0.42 | 1 | MS.Trt_vs_MS.NoTrt_F |
| TOR1A    | 0.59455 | -0.4176 | 0.752 | 0.78 | 1 | MS.Trt_vs_MS.NoTrt_F |
| CD300LG  | 0.59467 | 0.33905 | 0.435 | 0.46 | 1 | MS.Trt_vs_MS.NoTrt_F |
| GRN      | 0.59498 | 1.53246 | 0.165 | 0.19 | 1 | MS.Trt_vs_MS.NoTrt_F |
| KLHDC10  | 0.59683 | -0.3732 | 0.41  | 0.4  | 1 | MS.Trt_vs_MS.NoTrt_F |
| MT-ND2   | 0.59687 | 0.37428 | 0.838 | 0.89 | 1 | MS.Trt_vs_MS.NoTrt_F |
| MACROD2  | 0.59707 | 0.31011 | 0.662 | 0.68 | 1 | MS.Trt_vs_MS.NoTrt_F |
| ADGRA3   | 0.59774 | 0.37433 | 0.428 | 0.41 | 1 | MS.Trt_vs_MS.NoTrt_F |
| POU5F1   | 0.59781 | 0.35423 | 0.554 | 0.55 | 1 | MS.Trt_vs_MS.NoTrt_F |
| PIN1     | 0.59843 | 0.65641 | 0.781 | 0.79 | 1 | MS.Trt_vs_MS.NoTrt_F |
| GSR      | 0.59957 | 0.72081 | 0.277 | 0.32 | 1 | MS.Trt_vs_MS.NoTrt_F |
| TSPYL1   | 0.60018 | 0.63604 | 0.622 | 0.69 | 1 | MS.Trt_vs_MS.NoTrt_F |
| ZNF780B  | 0.60056 | -0.4469 | 0.644 | 0.65 | 1 | MS.Trt_vs_MS.NoTrt_F |
| SCARB1   | 0.60075 | -0.2854 | 0.478 | 0.51 | 1 | MS.Trt_vs_MS.NoTrt_F |
| ZC3H4    | 0.60119 | 0.61355 | 0.371 | 0.46 | 1 | MS.Trt_vs_MS.NoTrt_F |
| SLC30A7  | 0.6014  | 0.81517 | 0.68  | 0.74 | 1 | MS.Trt_vs_MS.NoTrt_F |
| IMPACT   | 0.60193 | 1.37012 | 0.097 | 0.12 | 1 | MS.Trt_vs_MS.NoTrt_F |
| CTPS1    | 0.60285 | -0.3247 | 0.658 | 0.66 | 1 | MS.Trt_vs_MS.NoTrt_F |
| GALNT10  | 0.60401 | -0.3607 | 0.55  | 0.6  | 1 | MS.Trt_vs_MS.NoTrt_F |
| HOMEZ    | 0.6042  | 0.56188 | 0.295 | 0.32 | 1 | MS.Trt_vs_MS.NoTrt_F |
| GGCX     | 0.60476 | 0.53027 | 0.899 | 0.95 | 1 | MS.Trt_vs_MS.NoTrt_F |
| ZNF26    | 0.60482 | 0.35233 | 0.989 | 0.99 | 1 | MS.Trt_vs_MS.NoTrt_F |

|          |         |         |       |      |   |                      |
|----------|---------|---------|-------|------|---|----------------------|
| TNFRSF25 | 0.60502 | 0.69496 | 0.676 | 0.75 | 1 | MS.Trt_vs_MS.NoTrt_F |
| PCCA     | 0.60507 | 0.38094 | 0.608 | 0.66 | 1 | MS.Trt_vs_MS.NoTrt_F |
| SBNO1    | 0.60605 | 0.6088  | 0.655 | 0.7  | 1 | MS.Trt_vs_MS.NoTrt_F |
| CAPN12   | 0.60607 | 0.83183 | 0.493 | 0.54 | 1 | MS.Trt_vs_MS.NoTrt_F |
| NPIP15   | 0.60687 | 1.08357 | 0.331 | 0.33 | 1 | MS.Trt_vs_MS.NoTrt_F |
| DDX52    | 0.60853 | 0.33894 | 0.896 | 0.89 | 1 | MS.Trt_vs_MS.NoTrt_F |
| FAM200A  | 0.60878 | -0.4455 | 0.241 | 0.26 | 1 | MS.Trt_vs_MS.NoTrt_F |
| FAM83H   | 0.60888 | -0.3159 | 0.144 | 0.16 | 1 | MS.Trt_vs_MS.NoTrt_F |
| MEF2A    | 0.61067 | 0.39072 | 0.5   | 0.55 | 1 | MS.Trt_vs_MS.NoTrt_F |
| HAUS2    | 0.61092 | 0.2524  | 0.824 | 0.82 | 1 | MS.Trt_vs_MS.NoTrt_F |
| CCDC114  | 0.61131 | -0.7992 | 0.504 | 0.49 | 1 | MS.Trt_vs_MS.NoTrt_F |
| BRD4     | 0.6141  | 1.07163 | 0.317 | 0.37 | 1 | MS.Trt_vs_MS.NoTrt_F |
| ZNF418   | 0.61419 | 0.51375 | 0.205 | 0.23 | 1 | MS.Trt_vs_MS.NoTrt_F |
| EPN1     | 0.61523 | 0.26066 | 0.921 | 0.96 | 1 | MS.Trt_vs_MS.NoTrt_F |
| EXO2     | 0.61539 | 0.43028 | 0.594 | 0.58 | 1 | MS.Trt_vs_MS.NoTrt_F |
| DFFB     | 0.61544 | 0.39015 | 0.827 | 0.79 | 1 | MS.Trt_vs_MS.NoTrt_F |
| RPL35A   | 0.61579 | 0.38286 | 0.842 | 0.98 | 1 | MS.Trt_vs_MS.NoTrt_F |
| IFI27    | 0.61583 | 0.68742 | 0.442 | 0.46 | 1 | MS.Trt_vs_MS.NoTrt_F |
| ZFP82    | 0.61612 | 0.29051 | 0.712 | 0.75 | 1 | MS.Trt_vs_MS.NoTrt_F |
| SOS2     | 0.61682 | 1.52744 | 0.115 | 0.14 | 1 | MS.Trt_vs_MS.NoTrt_F |
| SPTSSA   | 0.61708 | -0.3297 | 0.363 | 0.41 | 1 | MS.Trt_vs_MS.NoTrt_F |
| CCNF     | 0.61733 | -0.7736 | 0.504 | 0.53 | 1 | MS.Trt_vs_MS.NoTrt_F |
| STAT2    | 0.61791 | 0.36456 | 0.892 | 0.93 | 1 | MS.Trt_vs_MS.NoTrt_F |
| TMEM33   | 0.61839 | 0.26885 | 0.914 | 0.88 | 1 | MS.Trt_vs_MS.NoTrt_F |
| MPP5     | 0.6196  | -0.4322 | 0.342 | 0.39 | 1 | MS.Trt_vs_MS.NoTrt_F |
| ZCWPW2   | 0.62084 | 0.35162 | 0.493 | 0.5  | 1 | MS.Trt_vs_MS.NoTrt_F |
| HEG1     | 0.62096 | 1.00787 | 0.126 | 0.14 | 1 | MS.Trt_vs_MS.NoTrt_F |
| MBD3     | 0.62174 | 0.70206 | 0.712 | 0.77 | 1 | MS.Trt_vs_MS.NoTrt_F |
| COMMD9   | 0.62246 | 0.4596  | 0.486 | 0.46 | 1 | MS.Trt_vs_MS.NoTrt_F |
| KCNN2    | 0.62353 | 0.34094 | 0.317 | 0.32 | 1 | MS.Trt_vs_MS.NoTrt_F |
| ZNF526   | 0.62372 | -0.2582 | 0.504 | 0.56 | 1 | MS.Trt_vs_MS.NoTrt_F |
| CACNB2   | 0.62405 | 0.65384 | 0.471 | 0.49 | 1 | MS.Trt_vs_MS.NoTrt_F |
| RNF14    | 0.62606 | -0.665  | 0.576 | 0.62 | 1 | MS.Trt_vs_MS.NoTrt_F |
| GPR161   | 0.62626 | 0.86463 | 0.406 | 0.46 | 1 | MS.Trt_vs_MS.NoTrt_F |
| PRICKLE3 | 0.62631 | 0.26163 | 0.504 | 0.53 | 1 | MS.Trt_vs_MS.NoTrt_F |
| SSR3     | 0.62867 | 0.38537 | 0.601 | 0.66 | 1 | MS.Trt_vs_MS.NoTrt_F |
| ENTPD5   | 0.62945 | 1.06989 | 0.543 | 0.53 | 1 | MS.Trt_vs_MS.NoTrt_F |
| ZNF169   | 0.63031 | 0.29354 | 0.849 | 0.87 | 1 | MS.Trt_vs_MS.NoTrt_F |
| SLC37A2  | 0.63068 | 0.33552 | 0.511 | 0.55 | 1 | MS.Trt_vs_MS.NoTrt_F |
| RAD1     | 0.63079 | 0.55188 | 0.701 | 0.74 | 1 | MS.Trt_vs_MS.NoTrt_F |

|            |         |         |       |      |   |                      |
|------------|---------|---------|-------|------|---|----------------------|
| PLOD1      | 0.6311  | 0.95158 | 0.68  | 0.66 | 1 | MS.Trt_vs_MS.NoTrt_F |
| CMC2       | 0.63144 | 0.53917 | 0.881 | 0.89 | 1 | MS.Trt_vs_MS.NoTrt_F |
| SLC14A1    | 0.63182 | 1.06785 | 0.504 | 0.54 | 1 | MS.Trt_vs_MS.NoTrt_F |
| RABAC1     | 0.63191 | 1.06131 | 0.273 | 0.33 | 1 | MS.Trt_vs_MS.NoTrt_F |
| SMARCB1    | 0.63268 | -0.3385 | 0.55  | 0.54 | 1 | MS.Trt_vs_MS.NoTrt_F |
| EXD1       | 0.63297 | 0.27875 | 0.54  | 0.55 | 1 | MS.Trt_vs_MS.NoTrt_F |
| MAVS       | 0.63334 | -0.4183 | 0.95  | 0.94 | 1 | MS.Trt_vs_MS.NoTrt_F |
| IFNLR1     | 0.63452 | -1.8914 | 0.144 | 0.17 | 1 | MS.Trt_vs_MS.NoTrt_F |
| MED18      | 0.63566 | 0.62896 | 0.615 | 0.66 | 1 | MS.Trt_vs_MS.NoTrt_F |
| DCTN3      | 0.63602 | 0.32192 | 0.446 | 0.49 | 1 | MS.Trt_vs_MS.NoTrt_F |
| PTCD2      | 0.63612 | 1.0455  | 0.608 | 0.61 | 1 | MS.Trt_vs_MS.NoTrt_F |
| CDCA3      | 0.63726 | 0.50045 | 0.565 | 0.63 | 1 | MS.Trt_vs_MS.NoTrt_F |
| PIGM       | 0.63741 | 0.48815 | 0.622 | 0.59 | 1 | MS.Trt_vs_MS.NoTrt_F |
| MRPS22     | 0.63792 | 0.28111 | 0.565 | 0.62 | 1 | MS.Trt_vs_MS.NoTrt_F |
| SPARCL1    | 0.63825 | 1.80326 | 0.18  | 0.17 | 1 | MS.Trt_vs_MS.NoTrt_F |
| NCAPG2     | 0.63858 | 2.57816 | 0.273 | 0.28 | 1 | MS.Trt_vs_MS.NoTrt_F |
| C17orf62   | 0.63955 | 0.42247 | 0.745 | 0.76 | 1 | MS.Trt_vs_MS.NoTrt_F |
| NUP155     | 0.64065 | 0.63961 | 0.917 | 0.91 | 1 | MS.Trt_vs_MS.NoTrt_F |
| P2RX5-TAX1 | 0.64203 | 0.46882 | 0.845 | 0.87 | 1 | MS.Trt_vs_MS.NoTrt_F |
| ST3GAL2    | 0.64214 | 0.54592 | 0.914 | 0.99 | 1 | MS.Trt_vs_MS.NoTrt_F |
| ANKRD16    | 0.64281 | 1.2142  | 0.46  | 0.49 | 1 | MS.Trt_vs_MS.NoTrt_F |
| SPTB       | 0.64375 | 0.39342 | 0.453 | 0.5  | 1 | MS.Trt_vs_MS.NoTrt_F |
| TEN1-CDK3  | 0.64646 | -0.3569 | 0.583 | 0.56 | 1 | MS.Trt_vs_MS.NoTrt_F |
| TM2D2      | 0.647   | 1.37759 | 0.392 | 0.4  | 1 | MS.Trt_vs_MS.NoTrt_F |
| ZNF639     | 0.64701 | -0.3682 | 0.871 | 0.93 | 1 | MS.Trt_vs_MS.NoTrt_F |
| DNAJB4     | 0.6488  | 0.36602 | 0.396 | 0.41 | 1 | MS.Trt_vs_MS.NoTrt_F |
| SLX1B      | 0.64885 | 0.70745 | 0.496 | 0.49 | 1 | MS.Trt_vs_MS.NoTrt_F |
| CORO1C     | 0.65169 | 1.18311 | 0.094 | 0.11 | 1 | MS.Trt_vs_MS.NoTrt_F |
| TRAT1      | 0.65254 | 1.14138 | 0.237 | 0.24 | 1 | MS.Trt_vs_MS.NoTrt_F |
| POLR2J3    | 0.65346 | 0.37039 | 0.986 | 0.99 | 1 | MS.Trt_vs_MS.NoTrt_F |
| BIRC5      | 0.65528 | 0.48541 | 0.655 | 0.72 | 1 | MS.Trt_vs_MS.NoTrt_F |
| FBXL4      | 0.65536 | 0.8486  | 0.525 | 0.58 | 1 | MS.Trt_vs_MS.NoTrt_F |
| D2HGDH     | 0.65843 | 0.28962 | 0.482 | 0.45 | 1 | MS.Trt_vs_MS.NoTrt_F |
| COX19      | 0.65972 | 0.43258 | 0.601 | 0.66 | 1 | MS.Trt_vs_MS.NoTrt_F |
| RWDD2A     | 0.66065 | 0.45713 | 0.5   | 0.56 | 1 | MS.Trt_vs_MS.NoTrt_F |
| ZNF737     | 0.66152 | -0.3303 | 0.849 | 0.88 | 1 | MS.Trt_vs_MS.NoTrt_F |
| MT-CO3     | 0.66176 | 0.5106  | 0.608 | 0.67 | 1 | MS.Trt_vs_MS.NoTrt_F |
| RBM44      | 0.66225 | 0.8082  | 0.27  | 0.29 | 1 | MS.Trt_vs_MS.NoTrt_F |
| ZSWIM1     | 0.66306 | 0.36565 | 0.737 | 0.72 | 1 | MS.Trt_vs_MS.NoTrt_F |
| PECAM1     | 0.66334 | 0.34389 | 0.745 | 0.76 | 1 | MS.Trt_vs_MS.NoTrt_F |



|          |         |         |       |      |                        |
|----------|---------|---------|-------|------|------------------------|
| KDM5B    | 0.66388 | 0.63613 | 0.371 | 0.35 | 1 MS.Trt_vs_MS.NoTrt_F |
| SMU1     | 0.66444 | 0.64587 | 0.773 | 0.82 | 1 MS.Trt_vs_MS.NoTrt_F |
| TGM2     | 0.66453 | 0.27651 | 0.608 | 0.58 | 1 MS.Trt_vs_MS.NoTrt_F |
| LGALS1   | 0.66468 | 0.97439 | 0.378 | 0.47 | 1 MS.Trt_vs_MS.NoTrt_F |
| EIF1AX   | 0.66521 | 0.99501 | 0.252 | 0.29 | 1 MS.Trt_vs_MS.NoTrt_F |
| RPS29    | 0.66523 | 0.43423 | 0.896 | 0.94 | 1 MS.Trt_vs_MS.NoTrt_F |
| CCDC180  | 0.66576 | -0.5266 | 0.709 | 0.78 | 1 MS.Trt_vs_MS.NoTrt_F |
| SLCO4C1  | 0.66598 | 1.1815  | 0.194 | 0.22 | 1 MS.Trt_vs_MS.NoTrt_F |
| PPM1L    | 0.66629 | -0.8253 | 0.313 | 0.33 | 1 MS.Trt_vs_MS.NoTrt_F |
| ZNF682   | 0.66728 | -0.822  | 0.403 | 0.38 | 1 MS.Trt_vs_MS.NoTrt_F |
| RGS11    | 0.66833 | 0.28406 | 0.18  | 0.2  | 1 MS.Trt_vs_MS.NoTrt_F |
| C14orf79 | 0.66859 | 0.60353 | 0.594 | 0.63 | 1 MS.Trt_vs_MS.NoTrt_F |
| CDC42BPG | 0.67063 | 0.25492 | 0.543 | 0.56 | 1 MS.Trt_vs_MS.NoTrt_F |
| MTA3     | 0.67073 | 0.72546 | 0.644 | 0.7  | 1 MS.Trt_vs_MS.NoTrt_F |
| MRPS28   | 0.67098 | -0.3594 | 0.59  | 0.63 | 1 MS.Trt_vs_MS.NoTrt_F |
| SHFM1    | 0.67102 | 0.468   | 0.91  | 0.92 | 1 MS.Trt_vs_MS.NoTrt_F |
| C19orf60 | 0.67133 | 0.31812 | 0.888 | 0.87 | 1 MS.Trt_vs_MS.NoTrt_F |
| F11R     | 0.67139 | 0.82625 | 0.615 | 0.66 | 1 MS.Trt_vs_MS.NoTrt_F |
| TPST2    | 0.67208 | 0.67753 | 0.619 | 0.65 | 1 MS.Trt_vs_MS.NoTrt_F |
| CLNK     | 0.67273 | 0.49836 | 0.687 | 0.69 | 1 MS.Trt_vs_MS.NoTrt_F |
| COA7     | 0.67421 | -0.5786 | 0.906 | 0.9  | 1 MS.Trt_vs_MS.NoTrt_F |
| TVP23A   | 0.67488 | 0.4341  | 0.507 | 0.54 | 1 MS.Trt_vs_MS.NoTrt_F |
| VPS33A   | 0.67493 | 0.31847 | 0.878 | 0.86 | 1 MS.Trt_vs_MS.NoTrt_F |
| CPSF4    | 0.67555 | 0.43108 | 0.417 | 0.46 | 1 MS.Trt_vs_MS.NoTrt_F |
| DLG5     | 0.67601 | 0.5482  | 0.45  | 0.45 | 1 MS.Trt_vs_MS.NoTrt_F |
| SERF2    | 0.67655 | 0.25378 | 0.827 | 0.9  | 1 MS.Trt_vs_MS.NoTrt_F |
| NPIPB11  | 0.67688 | 0.30467 | 0.522 | 0.62 | 1 MS.Trt_vs_MS.NoTrt_F |
| FBXL20   | 0.6771  | 0.39655 | 0.939 | 0.94 | 1 MS.Trt_vs_MS.NoTrt_F |
| SFMBT2   | 0.67738 | 1.66744 | 0.338 | 0.38 | 1 MS.Trt_vs_MS.NoTrt_F |
| PSMB4    | 0.67762 | 0.81969 | 0.371 | 0.45 | 1 MS.Trt_vs_MS.NoTrt_F |
| LBHD1    | 0.67783 | 0.72513 | 0.529 | 0.56 | 1 MS.Trt_vs_MS.NoTrt_F |
| NFKB1    | 0.678   | 3.05932 | 0.133 | 0.16 | 1 MS.Trt_vs_MS.NoTrt_F |
| CDK13    | 0.6788  | 0.45247 | 0.835 | 0.89 | 1 MS.Trt_vs_MS.NoTrt_F |
| EFHC1    | 0.6791  | 0.41535 | 0.906 | 0.87 | 1 MS.Trt_vs_MS.NoTrt_F |
| GSE1     | 0.67933 | 0.85783 | 0.399 | 0.46 | 1 MS.Trt_vs_MS.NoTrt_F |
| TMEM59   | 0.67967 | 0.26995 | 0.896 | 0.87 | 1 MS.Trt_vs_MS.NoTrt_F |
| VRK3     | 0.68106 | 0.28293 | 0.788 | 0.83 | 1 MS.Trt_vs_MS.NoTrt_F |
| ZNF66    | 0.68109 | -0.5421 | 0.626 | 0.62 | 1 MS.Trt_vs_MS.NoTrt_F |
| SLC6A16  | 0.68203 | 1.08624 | 0.252 | 0.29 | 1 MS.Trt_vs_MS.NoTrt_F |
| MCM4     | 0.68335 | -0.3761 | 0.604 | 0.6  | 1 MS.Trt_vs_MS.NoTrt_F |

|          |         |         |       |      |   |                      |
|----------|---------|---------|-------|------|---|----------------------|
| ZNF573   | 0.68337 | -0.7237 | 0.421 | 0.43 | 1 | MS.Trt_vs_MS.NoTrt_F |
| SMPD3    | 0.68422 | 0.61272 | 0.705 | 0.74 | 1 | MS.Trt_vs_MS.NoTrt_F |
| DDX3X    | 0.68501 | 0.58607 | 0.381 | 0.4  | 1 | MS.Trt_vs_MS.NoTrt_F |
| COX20    | 0.68513 | 0.75284 | 0.622 | 0.65 | 1 | MS.Trt_vs_MS.NoTrt_F |
| IL17RC   | 0.68585 | -0.6508 | 0.428 | 0.37 | 1 | MS.Trt_vs_MS.NoTrt_F |
| MIB2     | 0.68793 | 1.00963 | 0.245 | 0.26 | 1 | MS.Trt_vs_MS.NoTrt_F |
| ASPSCR1  | 0.68849 | 0.28077 | 0.64  | 0.66 | 1 | MS.Trt_vs_MS.NoTrt_F |
| GFOD2    | 0.68962 | 0.295   | 0.888 | 0.92 | 1 | MS.Trt_vs_MS.NoTrt_F |
| POMT1    | 0.69003 | 0.59253 | 0.547 | 0.58 | 1 | MS.Trt_vs_MS.NoTrt_F |
| TCEANC2  | 0.69073 | -0.3746 | 0.91  | 0.93 | 1 | MS.Trt_vs_MS.NoTrt_F |
| TCTN2    | 0.69093 | 0.43611 | 0.763 | 0.78 | 1 | MS.Trt_vs_MS.NoTrt_F |
| STX3     | 0.69133 | 0.4699  | 0.446 | 0.49 | 1 | MS.Trt_vs_MS.NoTrt_F |
| NFATC2IP | 0.69279 | 0.35481 | 0.737 | 0.73 | 1 | MS.Trt_vs_MS.NoTrt_F |
| PSMB6    | 0.69288 | 0.64953 | 0.629 | 0.62 | 1 | MS.Trt_vs_MS.NoTrt_F |
| INMT     | 0.69288 | 0.31743 | 0.683 | 0.74 | 1 | MS.Trt_vs_MS.NoTrt_F |
| NUDT15   | 0.69525 | 1.1934  | 0.594 | 0.62 | 1 | MS.Trt_vs_MS.NoTrt_F |
| ZNF696   | 0.69555 | 0.32085 | 0.363 | 0.35 | 1 | MS.Trt_vs_MS.NoTrt_F |
| PDE6B    | 0.69559 | 0.42585 | 0.615 | 0.66 | 1 | MS.Trt_vs_MS.NoTrt_F |
| TTC39C   | 0.69626 | 0.47934 | 0.817 | 0.9  | 1 | MS.Trt_vs_MS.NoTrt_F |
| ATP1A3   | 0.69847 | -0.265  | 0.371 | 0.4  | 1 | MS.Trt_vs_MS.NoTrt_F |
| LSM5     | 0.69941 | 0.97955 | 0.5   | 0.5  | 1 | MS.Trt_vs_MS.NoTrt_F |
| HOPX     | 0.7017  | 0.49317 | 0.781 | 0.85 | 1 | MS.Trt_vs_MS.NoTrt_F |
| NBPF12   | 0.70357 | 0.9542  | 0.371 | 0.38 | 1 | MS.Trt_vs_MS.NoTrt_F |
| PSMD12   | 0.70442 | 0.83505 | 0.723 | 0.79 | 1 | MS.Trt_vs_MS.NoTrt_F |
| ING5     | 0.70789 | -0.3065 | 0.95  | 0.94 | 1 | MS.Trt_vs_MS.NoTrt_F |
| DCLRE1C  | 0.70806 | 0.66103 | 0.691 | 0.69 | 1 | MS.Trt_vs_MS.NoTrt_F |
| PLEKHH3  | 0.70823 | 0.2701  | 0.561 | 0.6  | 1 | MS.Trt_vs_MS.NoTrt_F |
| ACTR3C   | 0.70946 | 0.42517 | 0.525 | 0.56 | 1 | MS.Trt_vs_MS.NoTrt_F |
| GCLC     | 0.70951 | -0.7547 | 0.568 | 0.59 | 1 | MS.Trt_vs_MS.NoTrt_F |
| SETDB1   | 0.70961 | 0.3164  | 0.604 | 0.55 | 1 | MS.Trt_vs_MS.NoTrt_F |
| C4orf19  | 0.71106 | 0.33654 | 0.759 | 0.83 | 1 | MS.Trt_vs_MS.NoTrt_F |
| PHEX     | 0.71152 | -1.1692 | 0.101 | 0.11 | 1 | MS.Trt_vs_MS.NoTrt_F |
| DHX57    | 0.71185 | -0.3077 | 0.597 | 0.57 | 1 | MS.Trt_vs_MS.NoTrt_F |
| FOSB     | 0.71217 | 0.85817 | 0.36  | 0.4  | 1 | MS.Trt_vs_MS.NoTrt_F |
| SUCLG1   | 0.71232 | 0.28777 | 0.442 | 0.46 | 1 | MS.Trt_vs_MS.NoTrt_F |
| ZNF441   | 0.71322 | 1.69504 | 0.205 | 0.23 | 1 | MS.Trt_vs_MS.NoTrt_F |
| MORN1    | 0.71379 | 0.77774 | 0.568 | 0.55 | 1 | MS.Trt_vs_MS.NoTrt_F |
| ZNF625   | 0.71671 | 0.36923 | 0.284 | 0.28 | 1 | MS.Trt_vs_MS.NoTrt_F |
| PARVA    | 0.71678 | -0.2804 | 0.719 | 0.79 | 1 | MS.Trt_vs_MS.NoTrt_F |
| AGPAT5   | 0.7175  | 1.73489 | 0.147 | 0.17 | 1 | MS.Trt_vs_MS.NoTrt_F |

|          |         |         |       |      |                        |
|----------|---------|---------|-------|------|------------------------|
| PIPOX    | 0.7179  | -0.4378 | 0.615 | 0.6  | 1 MS.Trt_vs_MS.NoTrt_F |
| SPG7     | 0.719   | 0.50315 | 0.957 | 0.97 | 1 MS.Trt_vs_MS.NoTrt_F |
| NCAPD2   | 0.71945 | 0.3805  | 0.45  | 0.46 | 1 MS.Trt_vs_MS.NoTrt_F |
| KCTD20   | 0.71997 | 0.84682 | 0.701 | 0.72 | 1 MS.Trt_vs_MS.NoTrt_F |
| P4HA2    | 0.72122 | 0.63621 | 0.464 | 0.53 | 1 MS.Trt_vs_MS.NoTrt_F |
| TRAPPC12 | 0.72128 | 0.36829 | 0.594 | 0.6  | 1 MS.Trt_vs_MS.NoTrt_F |
| SH2D1B   | 0.7216  | 0.92568 | 0.234 | 0.24 | 1 MS.Trt_vs_MS.NoTrt_F |
| CXorf57  | 0.72279 | -0.6896 | 0.147 | 0.16 | 1 MS.Trt_vs_MS.NoTrt_F |
| PPP6R3   | 0.72285 | 0.41392 | 0.522 | 0.57 | 1 MS.Trt_vs_MS.NoTrt_F |
| RGS16    | 0.72472 | 0.71206 | 0.112 | 0.13 | 1 MS.Trt_vs_MS.NoTrt_F |
| MICU1    | 0.72537 | 0.26947 | 0.719 | 0.73 | 1 MS.Trt_vs_MS.NoTrt_F |
| SAMD1    | 0.72579 | 0.97321 | 0.097 | 0.11 | 1 MS.Trt_vs_MS.NoTrt_F |
| ORAI3    | 0.72675 | 0.87569 | 0.137 | 0.16 | 1 MS.Trt_vs_MS.NoTrt_F |
| NEUROD2  | 0.72741 | 0.52758 | 0.212 | 0.22 | 1 MS.Trt_vs_MS.NoTrt_F |
| CLMN     | 0.72764 | 0.40996 | 0.633 | 0.7  | 1 MS.Trt_vs_MS.NoTrt_F |
| SUN1     | 0.72781 | 0.40363 | 0.612 | 0.7  | 1 MS.Trt_vs_MS.NoTrt_F |
| TMEM168  | 0.72829 | 1.04906 | 0.536 | 0.51 | 1 MS.Trt_vs_MS.NoTrt_F |
| ZNF836   | 0.72878 | -0.6107 | 0.223 | 0.24 | 1 MS.Trt_vs_MS.NoTrt_F |
| TBCEL    | 0.729   | -0.3956 | 0.162 | 0.18 | 1 MS.Trt_vs_MS.NoTrt_F |
| C15orf61 | 0.72932 | 0.61153 | 0.576 | 0.63 | 1 MS.Trt_vs_MS.NoTrt_F |
| SSH1     | 0.7296  | 0.47771 | 0.86  | 0.89 | 1 MS.Trt_vs_MS.NoTrt_F |
| ZNF525   | 0.73036 | -0.8711 | 0.59  | 0.59 | 1 MS.Trt_vs_MS.NoTrt_F |
| CENPL    | 0.73037 | -0.3013 | 0.719 | 0.75 | 1 MS.Trt_vs_MS.NoTrt_F |
| ULK2     | 0.73092 | -0.333  | 0.727 | 0.72 | 1 MS.Trt_vs_MS.NoTrt_F |
| C7orf50  | 0.73116 | 0.45135 | 0.371 | 0.39 | 1 MS.Trt_vs_MS.NoTrt_F |
| ZNF346   | 0.73142 | -0.5463 | 0.799 | 0.8  | 1 MS.Trt_vs_MS.NoTrt_F |
| TYMS     | 0.7317  | 1.12546 | 0.237 | 0.26 | 1 MS.Trt_vs_MS.NoTrt_F |
| USF3     | 0.73238 | 0.42622 | 0.727 | 0.77 | 1 MS.Trt_vs_MS.NoTrt_F |
| FAM131A  | 0.73395 | 0.51775 | 0.795 | 0.82 | 1 MS.Trt_vs_MS.NoTrt_F |
| CFP      | 0.7343  | 2.3235  | 0.363 | 0.38 | 1 MS.Trt_vs_MS.NoTrt_F |
| ZNF385C  | 0.73502 | 0.36043 | 0.572 | 0.61 | 1 MS.Trt_vs_MS.NoTrt_F |
| MED13    | 0.73559 | 0.53675 | 0.554 | 0.56 | 1 MS.Trt_vs_MS.NoTrt_F |
| RUVBL1   | 0.73561 | 0.45868 | 0.734 | 0.71 | 1 MS.Trt_vs_MS.NoTrt_F |
| SRGAP2   | 0.73578 | 0.26545 | 0.543 | 0.59 | 1 MS.Trt_vs_MS.NoTrt_F |
| ZNF683   | 0.73609 | 1.09757 | 0.112 | 0.11 | 1 MS.Trt_vs_MS.NoTrt_F |
| IFI35    | 0.73738 | 0.30749 | 0.799 | 0.83 | 1 MS.Trt_vs_MS.NoTrt_F |
| HMGCL    | 0.73757 | -1.0167 | 0.601 | 0.6  | 1 MS.Trt_vs_MS.NoTrt_F |
| TRHDE    | 0.738   | 0.26791 | 0.234 | 0.26 | 1 MS.Trt_vs_MS.NoTrt_F |
| MRPS24   | 0.73845 | 0.32774 | 0.547 | 0.55 | 1 MS.Trt_vs_MS.NoTrt_F |
| RREB1    | 0.73851 | 0.72663 | 0.752 | 0.8  | 1 MS.Trt_vs_MS.NoTrt_F |

|            |         |         |       |      |                        |
|------------|---------|---------|-------|------|------------------------|
| PTAFR      | 0.73868 | -0.3326 | 0.64  | 0.65 | 1 MS.Trt_vs_MS.NoTrt_F |
| ACTN1      | 0.73986 | 1.18652 | 0.601 | 0.66 | 1 MS.Trt_vs_MS.NoTrt_F |
| PPT2       | 0.73991 | -0.3377 | 0.576 | 0.56 | 1 MS.Trt_vs_MS.NoTrt_F |
| FAM135A    | 0.74156 | -0.3727 | 0.471 | 0.46 | 1 MS.Trt_vs_MS.NoTrt_F |
| AC006449.1 | 0.7432  | 0.47133 | 0.18  | 0.2  | 1 MS.Trt_vs_MS.NoTrt_F |
| LPIN3      | 0.7433  | -0.3115 | 0.471 | 0.49 | 1 MS.Trt_vs_MS.NoTrt_F |
| RPH3AL     | 0.74373 | 0.44707 | 0.363 | 0.38 | 1 MS.Trt_vs_MS.NoTrt_F |
| APBA2      | 0.74412 | 0.33385 | 0.529 | 0.61 | 1 MS.Trt_vs_MS.NoTrt_F |
| NHLRC2     | 0.74473 | 0.56542 | 0.763 | 0.79 | 1 MS.Trt_vs_MS.NoTrt_F |
| FOXO3      | 0.74511 | 0.98226 | 0.421 | 0.43 | 1 MS.Trt_vs_MS.NoTrt_F |
| SPOCD1     | 0.74564 | 0.5018  | 0.601 | 0.64 | 1 MS.Trt_vs_MS.NoTrt_F |
| ZNF530     | 0.74621 | -1.1815 | 0.511 | 0.52 | 1 MS.Trt_vs_MS.NoTrt_F |
| CACUL1     | 0.74659 | 1.03248 | 0.766 | 0.79 | 1 MS.Trt_vs_MS.NoTrt_F |
| TMEM136    | 0.74667 | 1.14409 | 0.54  | 0.53 | 1 MS.Trt_vs_MS.NoTrt_F |
| ZSWIM7     | 0.74698 | 0.52634 | 0.781 | 0.84 | 1 MS.Trt_vs_MS.NoTrt_F |
| BTNL9      | 0.74722 | 0.41899 | 0.853 | 0.88 | 1 MS.Trt_vs_MS.NoTrt_F |
| ZSCAN31    | 0.74731 | 0.29584 | 0.108 | 0.1  | 1 MS.Trt_vs_MS.NoTrt_F |
| AFAP1L1    | 0.74833 | 0.28727 | 0.54  | 0.48 | 1 MS.Trt_vs_MS.NoTrt_F |
| YARS       | 0.74866 | -0.4078 | 0.871 | 0.9  | 1 MS.Trt_vs_MS.NoTrt_F |
| LRRC57     | 0.74915 | 0.29937 | 0.968 | 0.98 | 1 MS.Trt_vs_MS.NoTrt_F |
| CTSB       | 0.74961 | 0.30962 | 0.917 | 0.96 | 1 MS.Trt_vs_MS.NoTrt_F |
| ASB16      | 0.74996 | 0.3335  | 0.396 | 0.41 | 1 MS.Trt_vs_MS.NoTrt_F |
| LARP4B     | 0.75025 | 1.6878  | 0.306 | 0.36 | 1 MS.Trt_vs_MS.NoTrt_F |
| LIG3       | 0.75083 | -0.6199 | 0.273 | 0.28 | 1 MS.Trt_vs_MS.NoTrt_F |
| DDX59      | 0.7514  | 0.40791 | 0.46  | 0.45 | 1 MS.Trt_vs_MS.NoTrt_F |
| RAC1       | 0.75251 | 1.06497 | 0.23  | 0.27 | 1 MS.Trt_vs_MS.NoTrt_F |
| C3orf62    | 0.75259 | -0.2856 | 0.773 | 0.86 | 1 MS.Trt_vs_MS.NoTrt_F |
| SHPK       | 0.75359 | -0.597  | 0.486 | 0.49 | 1 MS.Trt_vs_MS.NoTrt_F |
| GTSF1      | 0.7539  | -0.3572 | 0.273 | 0.27 | 1 MS.Trt_vs_MS.NoTrt_F |
| BCR        | 0.75409 | 1.95306 | 0.291 | 0.32 | 1 MS.Trt_vs_MS.NoTrt_F |
| BAP1       | 0.75499 | 0.64504 | 0.299 | 0.28 | 1 MS.Trt_vs_MS.NoTrt_F |
| TRIM22     | 0.75533 | 0.41258 | 0.885 | 0.91 | 1 MS.Trt_vs_MS.NoTrt_F |
| MT-ND6     | 0.75552 | 0.50178 | 0.651 | 0.8  | 1 MS.Trt_vs_MS.NoTrt_F |
| KLHL23     | 0.75565 | 0.26232 | 0.223 | 0.24 | 1 MS.Trt_vs_MS.NoTrt_F |
| IRF2BPL    | 0.75578 | 0.78096 | 0.489 | 0.51 | 1 MS.Trt_vs_MS.NoTrt_F |
| ZNF630     | 0.75603 | -0.899  | 0.453 | 0.47 | 1 MS.Trt_vs_MS.NoTrt_F |
| SYNJ2      | 0.75617 | -0.4088 | 0.899 | 0.91 | 1 MS.Trt_vs_MS.NoTrt_F |
| CKAP2L     | 0.75637 | 0.34035 | 0.522 | 0.57 | 1 MS.Trt_vs_MS.NoTrt_F |
| ZBTB3      | 0.75674 | 0.27895 | 0.781 | 0.84 | 1 MS.Trt_vs_MS.NoTrt_F |
| TUBB4A     | 0.75701 | -0.6121 | 0.201 | 0.22 | 1 MS.Trt_vs_MS.NoTrt_F |

|            |         |         |       |      |   |                      |
|------------|---------|---------|-------|------|---|----------------------|
| GPATCH2L   | 0.75708 | 0.29259 | 0.701 | 0.72 | 1 | MS.Trt_vs_MS.NoTrt_F |
| ZNF461     | 0.75715 | 0.50319 | 0.655 | 0.66 | 1 | MS.Trt_vs_MS.NoTrt_F |
| STPG1      | 0.75785 | -0.7302 | 0.791 | 0.81 | 1 | MS.Trt_vs_MS.NoTrt_F |
| BOP1       | 0.7582  | 0.37588 | 0.241 | 0.26 | 1 | MS.Trt_vs_MS.NoTrt_F |
| TSC22D2    | 0.75841 | 0.82608 | 0.435 | 0.48 | 1 | MS.Trt_vs_MS.NoTrt_F |
| SNRPD3     | 0.75843 | 0.64419 | 0.716 | 0.76 | 1 | MS.Trt_vs_MS.NoTrt_F |
| EML2       | 0.75884 | 0.26078 | 0.694 | 0.68 | 1 | MS.Trt_vs_MS.NoTrt_F |
| SLC39A8    | 0.75909 | -0.3457 | 0.385 | 0.39 | 1 | MS.Trt_vs_MS.NoTrt_F |
| FBXO43     | 0.75973 | 0.2742  | 0.442 | 0.47 | 1 | MS.Trt_vs_MS.NoTrt_F |
| EFCAB13    | 0.76    | -0.4159 | 0.342 | 0.35 | 1 | MS.Trt_vs_MS.NoTrt_F |
| DOPEY2     | 0.76055 | -0.3772 | 0.799 | 0.83 | 1 | MS.Trt_vs_MS.NoTrt_F |
| EBPL       | 0.76084 | 0.34689 | 0.647 | 0.71 | 1 | MS.Trt_vs_MS.NoTrt_F |
| AC025335.1 | 0.76151 | -0.4513 | 0.615 | 0.58 | 1 | MS.Trt_vs_MS.NoTrt_F |
| C5         | 0.76199 | -0.2572 | 0.457 | 0.48 | 1 | MS.Trt_vs_MS.NoTrt_F |
| ARMC10     | 0.76279 | -0.3696 | 0.601 | 0.64 | 1 | MS.Trt_vs_MS.NoTrt_F |
| MTHFD1L    | 0.7631  | 2.0431  | 0.144 | 0.16 | 1 | MS.Trt_vs_MS.NoTrt_F |
| SRSF6      | 0.76334 | 0.7984  | 0.723 | 0.8  | 1 | MS.Trt_vs_MS.NoTrt_F |
| COX15      | 0.7637  | -0.5729 | 0.633 | 0.62 | 1 | MS.Trt_vs_MS.NoTrt_F |
| TIMM10B    | 0.76379 | 0.45974 | 0.604 | 0.58 | 1 | MS.Trt_vs_MS.NoTrt_F |
| DGKD       | 0.76409 | 0.33507 | 0.622 | 0.64 | 1 | MS.Trt_vs_MS.NoTrt_F |
| KANK1      | 0.76438 | 0.3653  | 0.734 | 0.76 | 1 | MS.Trt_vs_MS.NoTrt_F |
| SCUBE3     | 0.76494 | -0.2774 | 0.626 | 0.66 | 1 | MS.Trt_vs_MS.NoTrt_F |
| C6orf25    | 0.76508 | 0.61631 | 0.518 | 0.55 | 1 | MS.Trt_vs_MS.NoTrt_F |
| POLK       | 0.76514 | 0.50093 | 0.82  | 0.87 | 1 | MS.Trt_vs_MS.NoTrt_F |
| EBNA1BP2   | 0.76566 | 0.35005 | 0.543 | 0.51 | 1 | MS.Trt_vs_MS.NoTrt_F |
| ZCCHC9     | 0.76621 | 0.25528 | 0.673 | 0.68 | 1 | MS.Trt_vs_MS.NoTrt_F |
| SMIM8      | 0.7663  | 1.29044 | 0.604 | 0.63 | 1 | MS.Trt_vs_MS.NoTrt_F |
| CASS4      | 0.76691 | 0.48643 | 0.482 | 0.49 | 1 | MS.Trt_vs_MS.NoTrt_F |
| GDAP2      | 0.76884 | 0.69363 | 0.633 | 0.69 | 1 | MS.Trt_vs_MS.NoTrt_F |
| ZNF70      | 0.77039 | 0.62618 | 0.871 | 0.87 | 1 | MS.Trt_vs_MS.NoTrt_F |
| KIAA1586   | 0.77121 | 1.23002 | 0.155 | 0.17 | 1 | MS.Trt_vs_MS.NoTrt_F |
| PIGW       | 0.77294 | -0.6871 | 0.439 | 0.43 | 1 | MS.Trt_vs_MS.NoTrt_F |
| PHTF1      | 0.77306 | 0.38722 | 0.536 | 0.57 | 1 | MS.Trt_vs_MS.NoTrt_F |
| NTHL1      | 0.77312 | -0.4772 | 0.119 | 0.11 | 1 | MS.Trt_vs_MS.NoTrt_F |
| EIF4E      | 0.77356 | 0.45081 | 0.986 | 0.99 | 1 | MS.Trt_vs_MS.NoTrt_F |
| ATP5S      | 0.77632 | 0.70208 | 0.91  | 0.93 | 1 | MS.Trt_vs_MS.NoTrt_F |
| CCT2       | 0.77967 | 0.31464 | 0.802 | 0.83 | 1 | MS.Trt_vs_MS.NoTrt_F |
| EEF1D      | 0.77976 | 0.30134 | 0.842 | 0.94 | 1 | MS.Trt_vs_MS.NoTrt_F |
| PRMT2      | 0.78019 | 0.49431 | 0.417 | 0.46 | 1 | MS.Trt_vs_MS.NoTrt_F |
| ZNF135     | 0.7806  | 1.42292 | 0.432 | 0.49 | 1 | MS.Trt_vs_MS.NoTrt_F |

|          |         |         |       |      |                        |
|----------|---------|---------|-------|------|------------------------|
| MIER2    | 0.7807  | 0.91743 | 0.532 | 0.54 | 1 MS.Trt_vs_MS.NoTrt_F |
| TUBG1    | 0.78075 | 0.37338 | 0.615 | 0.61 | 1 MS.Trt_vs_MS.NoTrt_F |
| RIN2     | 0.78105 | 0.76781 | 0.295 | 0.3  | 1 MS.Trt_vs_MS.NoTrt_F |
| COQ5     | 0.7813  | 0.32867 | 0.817 | 0.9  | 1 MS.Trt_vs_MS.NoTrt_F |
| YEATS2   | 0.78131 | 0.30259 | 0.698 | 0.7  | 1 MS.Trt_vs_MS.NoTrt_F |
| LEO1     | 0.7824  | 0.42514 | 0.59  | 0.56 | 1 MS.Trt_vs_MS.NoTrt_F |
| YPEL1    | 0.7831  | 1.34652 | 0.446 | 0.47 | 1 MS.Trt_vs_MS.NoTrt_F |
| PPP2R1B  | 0.78423 | 0.47229 | 0.442 | 0.47 | 1 MS.Trt_vs_MS.NoTrt_F |
| COL1A1   | 0.7855  | 0.58832 | 0.525 | 0.55 | 1 MS.Trt_vs_MS.NoTrt_F |
| ZNF610   | 0.78568 | 0.50258 | 0.468 | 0.45 | 1 MS.Trt_vs_MS.NoTrt_F |
| GAL3ST4  | 0.78663 | 0.8601  | 0.453 | 0.45 | 1 MS.Trt_vs_MS.NoTrt_F |
| PRPF39   | 0.78692 | 0.33292 | 0.378 | 0.4  | 1 MS.Trt_vs_MS.NoTrt_F |
| TNFRSF17 | 0.78739 | 0.34775 | 0.453 | 0.53 | 1 MS.Trt_vs_MS.NoTrt_F |
| SULT1B1  | 0.78817 | 0.27035 | 0.899 | 0.96 | 1 MS.Trt_vs_MS.NoTrt_F |
| DTWD1    | 0.78876 | 0.61023 | 0.619 | 0.64 | 1 MS.Trt_vs_MS.NoTrt_F |
| LSAMP    | 0.78905 | 0.49277 | 0.45  | 0.5  | 1 MS.Trt_vs_MS.NoTrt_F |
| ZC3H8    | 0.78929 | 0.46322 | 0.781 | 0.8  | 1 MS.Trt_vs_MS.NoTrt_F |
| ITPK1    | 0.78949 | -0.8093 | 0.547 | 0.58 | 1 MS.Trt_vs_MS.NoTrt_F |
| TMPRSS3  | 0.7897  | -0.4633 | 0.367 | 0.38 | 1 MS.Trt_vs_MS.NoTrt_F |
| WDR11    | 0.7899  | -0.5678 | 0.619 | 0.61 | 1 MS.Trt_vs_MS.NoTrt_F |
| SLC31A1  | 0.79026 | -0.564  | 0.784 | 0.79 | 1 MS.Trt_vs_MS.NoTrt_F |
| NAA16    | 0.79037 | 0.38471 | 0.417 | 0.43 | 1 MS.Trt_vs_MS.NoTrt_F |
| MZB1     | 0.79049 | 0.25834 | 0.626 | 0.66 | 1 MS.Trt_vs_MS.NoTrt_F |
| PTPN12   | 0.7905  | 0.38519 | 0.77  | 0.81 | 1 MS.Trt_vs_MS.NoTrt_F |
| FOXP2    | 0.79103 | 0.39605 | 0.284 | 0.32 | 1 MS.Trt_vs_MS.NoTrt_F |
| GTF2H3   | 0.79125 | 0.42111 | 0.694 | 0.76 | 1 MS.Trt_vs_MS.NoTrt_F |
| CARS2    | 0.7915  | 0.56455 | 0.745 | 0.77 | 1 MS.Trt_vs_MS.NoTrt_F |
| PDCD4    | 0.79174 | 0.65093 | 0.629 | 0.71 | 1 MS.Trt_vs_MS.NoTrt_F |
| SLC30A4  | 0.79191 | 1.00439 | 0.845 | 0.89 | 1 MS.Trt_vs_MS.NoTrt_F |
| ZNF724   | 0.79233 | -0.5869 | 0.863 | 0.92 | 1 MS.Trt_vs_MS.NoTrt_F |
| ASAH2B   | 0.79237 | 0.43127 | 0.421 | 0.41 | 1 MS.Trt_vs_MS.NoTrt_F |
| DAG1     | 0.79343 | -0.4735 | 0.554 | 0.59 | 1 MS.Trt_vs_MS.NoTrt_F |
| ARPC2    | 0.79352 | 0.25641 | 0.971 | 0.99 | 1 MS.Trt_vs_MS.NoTrt_F |
| CRKL     | 0.79435 | 0.61792 | 0.601 | 0.64 | 1 MS.Trt_vs_MS.NoTrt_F |
| SOGA1    | 0.79511 | 0.40447 | 0.597 | 0.65 | 1 MS.Trt_vs_MS.NoTrt_F |
| DENND2D  | 0.79564 | 0.34457 | 0.392 | 0.44 | 1 MS.Trt_vs_MS.NoTrt_F |
| ATAD2B   | 0.79646 | -0.3049 | 0.741 | 0.74 | 1 MS.Trt_vs_MS.NoTrt_F |
| ZNF37A   | 0.79875 | 0.9933  | 0.863 | 0.92 | 1 MS.Trt_vs_MS.NoTrt_F |
| ZNF583   | 0.79891 | 0.39989 | 0.781 | 0.85 | 1 MS.Trt_vs_MS.NoTrt_F |
| DR1      | 0.79918 | 0.62107 | 0.795 | 0.83 | 1 MS.Trt_vs_MS.NoTrt_F |

|          |         |         |       |      |                        |
|----------|---------|---------|-------|------|------------------------|
| SIN3B    | 0.7992  | 0.51762 | 0.788 | 0.78 | 1 MS.Trt_vs_MS.NoTrt_F |
| ADGRG1   | 0.79937 | 1.45451 | 0.694 | 0.72 | 1 MS.Trt_vs_MS.NoTrt_F |
| SMYD4    | 0.79945 | 0.54083 | 0.813 | 0.87 | 1 MS.Trt_vs_MS.NoTrt_F |
| FAM76A   | 0.79953 | 0.36693 | 0.86  | 0.85 | 1 MS.Trt_vs_MS.NoTrt_F |
| RNFT2    | 0.80022 | -0.3512 | 0.881 | 0.93 | 1 MS.Trt_vs_MS.NoTrt_F |
| TSR2     | 0.80079 | 0.30059 | 0.446 | 0.46 | 1 MS.Trt_vs_MS.NoTrt_F |
| SDE2     | 0.80092 | 0.26907 | 0.655 | 0.72 | 1 MS.Trt_vs_MS.NoTrt_F |
| BRCA2    | 0.80229 | -0.4203 | 0.424 | 0.43 | 1 MS.Trt_vs_MS.NoTrt_F |
| MAP3K10  | 0.80305 | 0.49535 | 0.342 | 0.38 | 1 MS.Trt_vs_MS.NoTrt_F |
| TXK      | 0.80315 | 1.13554 | 0.626 | 0.64 | 1 MS.Trt_vs_MS.NoTrt_F |
| ZFP90    | 0.80332 | -0.7676 | 0.471 | 0.44 | 1 MS.Trt_vs_MS.NoTrt_F |
| SF3B3    | 0.80429 | 0.28477 | 0.942 | 0.97 | 1 MS.Trt_vs_MS.NoTrt_F |
| NWD1     | 0.80472 | -0.3155 | 0.511 | 0.53 | 1 MS.Trt_vs_MS.NoTrt_F |
| DGKE     | 0.80502 | 0.42408 | 0.709 | 0.75 | 1 MS.Trt_vs_MS.NoTrt_F |
| MOAP1    | 0.80552 | 1.09224 | 0.388 | 0.42 | 1 MS.Trt_vs_MS.NoTrt_F |
| RHBDF2   | 0.80643 | 0.4685  | 0.914 | 0.93 | 1 MS.Trt_vs_MS.NoTrt_F |
| ZFYVE21  | 0.80686 | 0.44927 | 0.662 | 0.73 | 1 MS.Trt_vs_MS.NoTrt_F |
| PKIG     | 0.80764 | 0.30433 | 0.572 | 0.71 | 1 MS.Trt_vs_MS.NoTrt_F |
| GRID1    | 0.80897 | 0.46962 | 0.147 | 0.14 | 1 MS.Trt_vs_MS.NoTrt_F |
| PSMD13   | 0.80917 | 0.41677 | 0.597 | 0.63 | 1 MS.Trt_vs_MS.NoTrt_F |
| ANGPT4   | 0.80978 | 0.25915 | 0.493 | 0.48 | 1 MS.Trt_vs_MS.NoTrt_F |
| IL20RB   | 0.81036 | 0.77008 | 0.299 | 0.32 | 1 MS.Trt_vs_MS.NoTrt_F |
| DNAJC14  | 0.81047 | -0.3064 | 0.608 | 0.62 | 1 MS.Trt_vs_MS.NoTrt_F |
| KCNT1    | 0.81079 | 0.29592 | 0.327 | 0.35 | 1 MS.Trt_vs_MS.NoTrt_F |
| SEC22B   | 0.81214 | 0.7498  | 0.853 | 0.84 | 1 MS.Trt_vs_MS.NoTrt_F |
| BLZF1    | 0.81216 | -0.4716 | 0.496 | 0.49 | 1 MS.Trt_vs_MS.NoTrt_F |
| EPHB1    | 0.81326 | 1.26818 | 0.112 | 0.12 | 1 MS.Trt_vs_MS.NoTrt_F |
| NCKAP5L  | 0.81347 | 0.39154 | 0.647 | 0.67 | 1 MS.Trt_vs_MS.NoTrt_F |
| OAZ3     | 0.81428 | -0.2991 | 0.468 | 0.45 | 1 MS.Trt_vs_MS.NoTrt_F |
| DCST1    | 0.81485 | 0.75638 | 0.155 | 0.17 | 1 MS.Trt_vs_MS.NoTrt_F |
| ME2      | 0.81498 | 0.56121 | 0.888 | 0.92 | 1 MS.Trt_vs_MS.NoTrt_F |
| CDC20B   | 0.81513 | 0.25568 | 0.612 | 0.67 | 1 MS.Trt_vs_MS.NoTrt_F |
| F2RL1    | 0.81517 | 1.6094  | 0.223 | 0.24 | 1 MS.Trt_vs_MS.NoTrt_F |
| C17orf75 | 0.81579 | 0.30036 | 0.827 | 0.85 | 1 MS.Trt_vs_MS.NoTrt_F |
| SPDYE2   | 0.81628 | 0.28683 | 0.633 | 0.71 | 1 MS.Trt_vs_MS.NoTrt_F |
| TAPBP    | 0.81692 | 0.26082 | 0.942 | 0.98 | 1 MS.Trt_vs_MS.NoTrt_F |
| C12orf49 | 0.81719 | 0.63209 | 0.737 | 0.78 | 1 MS.Trt_vs_MS.NoTrt_F |
| PDZD8    | 0.81723 | 0.57804 | 0.317 | 0.32 | 1 MS.Trt_vs_MS.NoTrt_F |
| SGK1     | 0.81728 | 1.71924 | 0.417 | 0.43 | 1 MS.Trt_vs_MS.NoTrt_F |
| FN1      | 0.81734 | 0.2583  | 0.403 | 0.41 | 1 MS.Trt_vs_MS.NoTrt_F |

|            |         |         |       |      |                        |
|------------|---------|---------|-------|------|------------------------|
| ATG3       | 0.81752 | 0.53977 | 0.46  | 0.44 | 1 MS.Trt_vs_MS.NoTrt_F |
| CAGE1      | 0.81787 | 0.45467 | 0.36  | 0.38 | 1 MS.Trt_vs_MS.NoTrt_F |
| DBF4       | 0.8181  | 0.62339 | 0.45  | 0.45 | 1 MS.Trt_vs_MS.NoTrt_F |
| BCL7B      | 0.81869 | 1.00808 | 0.442 | 0.48 | 1 MS.Trt_vs_MS.NoTrt_F |
| ZNF891     | 0.81905 | 0.33287 | 0.957 | 0.97 | 1 MS.Trt_vs_MS.NoTrt_F |
| PHF7       | 0.82021 | 0.26457 | 0.468 | 0.49 | 1 MS.Trt_vs_MS.NoTrt_F |
| DSE        | 0.82064 | -0.5888 | 0.115 | 0.12 | 1 MS.Trt_vs_MS.NoTrt_F |
| MEGF8      | 0.82172 | 1.15442 | 0.511 | 0.54 | 1 MS.Trt_vs_MS.NoTrt_F |
| GNB1       | 0.82174 | 1.05793 | 0.353 | 0.35 | 1 MS.Trt_vs_MS.NoTrt_F |
| POLA2      | 0.82206 | 0.25624 | 0.655 | 0.66 | 1 MS.Trt_vs_MS.NoTrt_F |
| ZNF177     | 0.82226 | 0.50485 | 0.133 | 0.13 | 1 MS.Trt_vs_MS.NoTrt_F |
| CEP152     | 0.82237 | -0.3181 | 0.709 | 0.7  | 1 MS.Trt_vs_MS.NoTrt_F |
| RPL35      | 0.82386 | 0.30927 | 0.691 | 0.87 | 1 MS.Trt_vs_MS.NoTrt_F |
| ZNRF1      | 0.82413 | 0.53148 | 0.295 | 0.31 | 1 MS.Trt_vs_MS.NoTrt_F |
| ABCA5      | 0.82436 | 0.90034 | 0.619 | 0.67 | 1 MS.Trt_vs_MS.NoTrt_F |
| CCND2      | 0.82495 | 1.04958 | 0.518 | 0.59 | 1 MS.Trt_vs_MS.NoTrt_F |
| FAM111A    | 0.82597 | 0.48431 | 0.525 | 0.54 | 1 MS.Trt_vs_MS.NoTrt_F |
| HYLS1      | 0.82603 | 1.33467 | 0.424 | 0.45 | 1 MS.Trt_vs_MS.NoTrt_F |
| ZFPM1      | 0.82629 | 0.59272 | 0.112 | 0.12 | 1 MS.Trt_vs_MS.NoTrt_F |
| PRR5-ARHG, | 0.8274  | -0.6179 | 0.129 | 0.14 | 1 MS.Trt_vs_MS.NoTrt_F |
| PLXNA3     | 0.82855 | 0.64614 | 0.809 | 0.85 | 1 MS.Trt_vs_MS.NoTrt_F |
| SLC28A2    | 0.82935 | -0.2869 | 0.763 | 0.8  | 1 MS.Trt_vs_MS.NoTrt_F |
| ANKRD13D   | 0.82963 | 0.74079 | 0.687 | 0.74 | 1 MS.Trt_vs_MS.NoTrt_F |
| CARD11     | 0.83111 | 0.82333 | 0.266 | 0.29 | 1 MS.Trt_vs_MS.NoTrt_F |
| C22orf46   | 0.83118 | 1.07419 | 0.36  | 0.38 | 1 MS.Trt_vs_MS.NoTrt_F |
| SLC30A5    | 0.83119 | 0.64775 | 0.734 | 0.76 | 1 MS.Trt_vs_MS.NoTrt_F |
| AMY2B      | 0.83136 | -0.7352 | 0.658 | 0.64 | 1 MS.Trt_vs_MS.NoTrt_F |
| ZNF662     | 0.83144 | 1.33843 | 0.576 | 0.58 | 1 MS.Trt_vs_MS.NoTrt_F |
| HSBP1      | 0.8316  | 1.03512 | 0.637 | 0.7  | 1 MS.Trt_vs_MS.NoTrt_F |
| ATG13      | 0.83165 | 0.71302 | 0.802 | 0.84 | 1 MS.Trt_vs_MS.NoTrt_F |
| HSPA2      | 0.83243 | -0.5393 | 0.565 | 0.59 | 1 MS.Trt_vs_MS.NoTrt_F |
| TIGD6      | 0.8326  | -0.674  | 0.227 | 0.24 | 1 MS.Trt_vs_MS.NoTrt_F |
| PFKFB2     | 0.83373 | 0.71474 | 0.281 | 0.28 | 1 MS.Trt_vs_MS.NoTrt_F |
| ERCC4      | 0.83488 | -0.6127 | 0.885 | 0.91 | 1 MS.Trt_vs_MS.NoTrt_F |
| TMED4      | 0.83513 | 0.54477 | 0.946 | 0.95 | 1 MS.Trt_vs_MS.NoTrt_F |
| RELL1      | 0.83585 | 0.68399 | 0.568 | 0.6  | 1 MS.Trt_vs_MS.NoTrt_F |
| METTL8     | 0.83687 | 0.38852 | 0.903 | 0.93 | 1 MS.Trt_vs_MS.NoTrt_F |
| USP49      | 0.83703 | 0.38396 | 0.745 | 0.73 | 1 MS.Trt_vs_MS.NoTrt_F |
| ZNF470     | 0.83877 | 0.39543 | 0.737 | 0.78 | 1 MS.Trt_vs_MS.NoTrt_F |
| FGFR4      | 0.83883 | 0.50592 | 0.421 | 0.44 | 1 MS.Trt_vs_MS.NoTrt_F |



|            |         |         |       |      |                        |
|------------|---------|---------|-------|------|------------------------|
| SENP5      | 0.83892 | 0.55829 | 0.921 | 0.93 | 1 MS.Trt_vs_MS.NoTrt_F |
| LEPR       | 0.83914 | 0.51736 | 0.356 | 0.33 | 1 MS.Trt_vs_MS.NoTrt_F |
| AGBL4      | 0.83939 | 0.28302 | 0.385 | 0.4  | 1 MS.Trt_vs_MS.NoTrt_F |
| SLX1A      | 0.83941 | 0.54127 | 0.543 | 0.56 | 1 MS.Trt_vs_MS.NoTrt_F |
| MXD1       | 0.84095 | 1.32586 | 0.173 | 0.19 | 1 MS.Trt_vs_MS.NoTrt_F |
| APPL1      | 0.84273 | -0.5326 | 0.486 | 0.48 | 1 MS.Trt_vs_MS.NoTrt_F |
| PGS1       | 0.84288 | -0.5811 | 0.651 | 0.61 | 1 MS.Trt_vs_MS.NoTrt_F |
| SGK494     | 0.84291 | 0.69377 | 0.701 | 0.76 | 1 MS.Trt_vs_MS.NoTrt_F |
| PPARGC1B   | 0.84294 | 0.8628  | 0.727 | 0.76 | 1 MS.Trt_vs_MS.NoTrt_F |
| HYKK       | 0.84333 | 0.52702 | 0.831 | 0.89 | 1 MS.Trt_vs_MS.NoTrt_F |
| USP4       | 0.8435  | 0.33843 | 0.928 | 0.94 | 1 MS.Trt_vs_MS.NoTrt_F |
| PLIN5      | 0.84452 | 0.29635 | 0.806 | 0.8  | 1 MS.Trt_vs_MS.NoTrt_F |
| SLF2       | 0.84494 | -0.3763 | 0.547 | 0.55 | 1 MS.Trt_vs_MS.NoTrt_F |
| PFKM       | 0.84534 | 0.34045 | 0.871 | 0.91 | 1 MS.Trt_vs_MS.NoTrt_F |
| CAPZA2     | 0.84567 | 0.4262  | 0.896 | 0.94 | 1 MS.Trt_vs_MS.NoTrt_F |
| WHAMM      | 0.84685 | 0.34237 | 0.838 | 0.87 | 1 MS.Trt_vs_MS.NoTrt_F |
| TMEM19     | 0.84694 | 0.25443 | 0.802 | 0.79 | 1 MS.Trt_vs_MS.NoTrt_F |
| UGT1A1     | 0.84732 | 0.28218 | 0.565 | 0.61 | 1 MS.Trt_vs_MS.NoTrt_F |
| CEP19      | 0.84735 | 0.75133 | 0.633 | 0.64 | 1 MS.Trt_vs_MS.NoTrt_F |
| HS3ST1     | 0.84793 | 0.63137 | 0.327 | 0.33 | 1 MS.Trt_vs_MS.NoTrt_F |
| ACSS2      | 0.84803 | 0.99638 | 0.54  | 0.55 | 1 MS.Trt_vs_MS.NoTrt_F |
| AVL9       | 0.84862 | 0.42775 | 0.896 | 0.93 | 1 MS.Trt_vs_MS.NoTrt_F |
| TMEM154    | 0.8497  | 0.40366 | 0.921 | 0.93 | 1 MS.Trt_vs_MS.NoTrt_F |
| RYR3       | 0.85001 | 0.28087 | 0.482 | 0.5  | 1 MS.Trt_vs_MS.NoTrt_F |
| RP11-1070B | 0.85039 | 1.00911 | 0.223 | 0.23 | 1 MS.Trt_vs_MS.NoTrt_F |
| LRRC2      | 0.85138 | -0.3262 | 0.745 | 0.79 | 1 MS.Trt_vs_MS.NoTrt_F |
| PHLDA1     | 0.85226 | 0.88769 | 0.525 | 0.56 | 1 MS.Trt_vs_MS.NoTrt_F |
| EIF2AK4    | 0.85246 | 0.52921 | 0.619 | 0.64 | 1 MS.Trt_vs_MS.NoTrt_F |
| TIMP3      | 0.85353 | 2.04749 | 0.097 | 0.11 | 1 MS.Trt_vs_MS.NoTrt_F |
| CLIP2      | 0.85389 | -0.7025 | 0.36  | 0.37 | 1 MS.Trt_vs_MS.NoTrt_F |
| CDT1       | 0.85465 | 0.27405 | 0.475 | 0.49 | 1 MS.Trt_vs_MS.NoTrt_F |
| KBTBD2     | 0.85641 | 0.48748 | 0.658 | 0.69 | 1 MS.Trt_vs_MS.NoTrt_F |
| RAB36      | 0.85646 | 0.52191 | 0.36  | 0.38 | 1 MS.Trt_vs_MS.NoTrt_F |
| NCR3LG1    | 0.85702 | -1.2707 | 0.104 | 0.11 | 1 MS.Trt_vs_MS.NoTrt_F |
| UNKL       | 0.85715 | 0.71605 | 0.482 | 0.47 | 1 MS.Trt_vs_MS.NoTrt_F |
| CXorf21    | 0.85815 | -1.2357 | 0.381 | 0.41 | 1 MS.Trt_vs_MS.NoTrt_F |
| HENMT1     | 0.85823 | -0.604  | 0.324 | 0.35 | 1 MS.Trt_vs_MS.NoTrt_F |
| BLOC1S3    | 0.85894 | 0.48158 | 0.597 | 0.6  | 1 MS.Trt_vs_MS.NoTrt_F |
| PLEKHA7    | 0.86083 | 0.73832 | 0.248 | 0.25 | 1 MS.Trt_vs_MS.NoTrt_F |
| IMP4       | 0.86189 | 0.52948 | 0.277 | 0.29 | 1 MS.Trt_vs_MS.NoTrt_F |

|            |         |         |       |      |                        |
|------------|---------|---------|-------|------|------------------------|
| ZNF316     | 0.86194 | -0.5957 | 0.532 | 0.53 | 1 MS.Trt_vs_MS.NoTrt_F |
| NMD3       | 0.86339 | 0.44886 | 0.709 | 0.71 | 1 MS.Trt_vs_MS.NoTrt_F |
| A2M        | 0.86495 | 1.42761 | 0.18  | 0.19 | 1 MS.Trt_vs_MS.NoTrt_F |
| AVIL       | 0.86597 | -0.6109 | 0.388 | 0.39 | 1 MS.Trt_vs_MS.NoTrt_F |
| PNP        | 0.86627 | 0.54951 | 0.385 | 0.4  | 1 MS.Trt_vs_MS.NoTrt_F |
| PEX13      | 0.8676  | 0.26911 | 0.795 | 0.77 | 1 MS.Trt_vs_MS.NoTrt_F |
| ZNF789     | 0.86769 | 0.90886 | 0.795 | 0.81 | 1 MS.Trt_vs_MS.NoTrt_F |
| MFSD9      | 0.86852 | 0.33716 | 0.478 | 0.5  | 1 MS.Trt_vs_MS.NoTrt_F |
| IDH3A      | 0.87063 | 0.54737 | 0.73  | 0.83 | 1 MS.Trt_vs_MS.NoTrt_F |
| KLHL36     | 0.87145 | 0.59629 | 0.644 | 0.67 | 1 MS.Trt_vs_MS.NoTrt_F |
| LRRC27     | 0.87472 | 0.42219 | 0.777 | 0.87 | 1 MS.Trt_vs_MS.NoTrt_F |
| RNF19B     | 0.87566 | 1.46238 | 0.112 | 0.11 | 1 MS.Trt_vs_MS.NoTrt_F |
| ZSCAN29    | 0.87614 | 1.33358 | 0.482 | 0.48 | 1 MS.Trt_vs_MS.NoTrt_F |
| SSC5D      | 0.87616 | -0.3117 | 0.112 | 0.12 | 1 MS.Trt_vs_MS.NoTrt_F |
| NSUN3      | 0.8764  | 0.50211 | 0.806 | 0.81 | 1 MS.Trt_vs_MS.NoTrt_F |
| USP6NL     | 0.87902 | 0.29563 | 0.759 | 0.8  | 1 MS.Trt_vs_MS.NoTrt_F |
| STAM2      | 0.87906 | 0.93302 | 0.579 | 0.62 | 1 MS.Trt_vs_MS.NoTrt_F |
| IFITM1     | 0.88027 | 0.57957 | 0.55  | 0.66 | 1 MS.Trt_vs_MS.NoTrt_F |
| RSRC1      | 0.88186 | 0.55039 | 0.759 | 0.76 | 1 MS.Trt_vs_MS.NoTrt_F |
| CXADR      | 0.88226 | -0.5885 | 0.327 | 0.34 | 1 MS.Trt_vs_MS.NoTrt_F |
| UBB        | 0.88289 | 0.52965 | 0.572 | 0.73 | 1 MS.Trt_vs_MS.NoTrt_F |
| CNPY4      | 0.88295 | -0.2537 | 0.716 | 0.72 | 1 MS.Trt_vs_MS.NoTrt_F |
| METTL12    | 0.88301 | -0.7262 | 0.655 | 0.64 | 1 MS.Trt_vs_MS.NoTrt_F |
| GP6        | 0.88611 | 0.59013 | 0.482 | 0.53 | 1 MS.Trt_vs_MS.NoTrt_F |
| CCP110     | 0.88637 | -0.3196 | 0.532 | 0.52 | 1 MS.Trt_vs_MS.NoTrt_F |
| MDM2       | 0.88747 | 0.57265 | 0.986 | 0.98 | 1 MS.Trt_vs_MS.NoTrt_F |
| TMEM80     | 0.88782 | 0.47602 | 0.594 | 0.6  | 1 MS.Trt_vs_MS.NoTrt_F |
| LIFR       | 0.88893 | 1.24212 | 0.176 | 0.19 | 1 MS.Trt_vs_MS.NoTrt_F |
| RIPK2      | 0.88937 | 0.41106 | 0.23  | 0.23 | 1 MS.Trt_vs_MS.NoTrt_F |
| PLEK       | 0.89028 | 2.94957 | 0.119 | 0.12 | 1 MS.Trt_vs_MS.NoTrt_F |
| AC013264.1 | 0.89111 | 0.90771 | 0.446 | 0.53 | 1 MS.Trt_vs_MS.NoTrt_F |
| DAAM2      | 0.89136 | 0.71601 | 0.421 | 0.44 | 1 MS.Trt_vs_MS.NoTrt_F |
| ZNF718     | 0.89167 | 0.28356 | 0.306 | 0.33 | 1 MS.Trt_vs_MS.NoTrt_F |
| LIMS1      | 0.89217 | 0.29631 | 0.874 | 0.9  | 1 MS.Trt_vs_MS.NoTrt_F |
| TTC39B     | 0.8928  | 0.92028 | 0.759 | 0.77 | 1 MS.Trt_vs_MS.NoTrt_F |
| DHTKD1     | 0.89361 | 0.88697 | 0.827 | 0.85 | 1 MS.Trt_vs_MS.NoTrt_F |
| MBTPS1     | 0.89543 | 0.43734 | 0.568 | 0.6  | 1 MS.Trt_vs_MS.NoTrt_F |
| DUSP12     | 0.89548 | 0.83876 | 0.349 | 0.37 | 1 MS.Trt_vs_MS.NoTrt_F |
| CD8A       | 0.89573 | 1.76908 | 0.133 | 0.14 | 1 MS.Trt_vs_MS.NoTrt_F |
| COQ8B      | 0.89665 | -0.3442 | 0.669 | 0.67 | 1 MS.Trt_vs_MS.NoTrt_F |

|          |         |         |       |      |                        |
|----------|---------|---------|-------|------|------------------------|
| U2AF1L4  | 0.89699 | 0.35312 | 0.799 | 0.83 | 1 MS.Trt_vs_MS.NoTrt_F |
| ATP10D   | 0.89726 | 0.7702  | 0.392 | 0.4  | 1 MS.Trt_vs_MS.NoTrt_F |
| SSR1     | 0.89765 | 0.48293 | 0.917 | 0.93 | 1 MS.Trt_vs_MS.NoTrt_F |
| TOB1     | 0.89848 | 0.41354 | 0.626 | 0.74 | 1 MS.Trt_vs_MS.NoTrt_F |
| RANGAP1  | 0.89917 | -0.3326 | 0.734 | 0.69 | 1 MS.Trt_vs_MS.NoTrt_F |
| ZNF846   | 0.89971 | 0.3765  | 0.496 | 0.53 | 1 MS.Trt_vs_MS.NoTrt_F |
| RALBP1   | 0.90019 | 0.86112 | 0.439 | 0.44 | 1 MS.Trt_vs_MS.NoTrt_F |
| SSU72    | 0.90045 | 0.43605 | 0.914 | 0.95 | 1 MS.Trt_vs_MS.NoTrt_F |
| SLC39A14 | 0.90055 | -0.974  | 0.46  | 0.45 | 1 MS.Trt_vs_MS.NoTrt_F |
| TP53     | 0.90379 | 0.33751 | 0.745 | 0.81 | 1 MS.Trt_vs_MS.NoTrt_F |
| DNAJB5   | 0.90472 | 0.94248 | 0.201 | 0.21 | 1 MS.Trt_vs_MS.NoTrt_F |
| THEM4    | 0.905   | 0.29483 | 0.809 | 0.79 | 1 MS.Trt_vs_MS.NoTrt_F |
| SRGAP3   | 0.90515 | -0.3168 | 0.835 | 0.88 | 1 MS.Trt_vs_MS.NoTrt_F |
| APOBEC3F | 0.90587 | 0.35825 | 0.924 | 0.88 | 1 MS.Trt_vs_MS.NoTrt_F |
| MAP3K11  | 0.90648 | 0.25222 | 0.691 | 0.7  | 1 MS.Trt_vs_MS.NoTrt_F |
| KLHL35   | 0.90779 | 0.46157 | 0.471 | 0.46 | 1 MS.Trt_vs_MS.NoTrt_F |
| ZNF576   | 0.90874 | 0.27705 | 0.536 | 0.56 | 1 MS.Trt_vs_MS.NoTrt_F |
| SWSAP1   | 0.91009 | -0.3013 | 0.701 | 0.71 | 1 MS.Trt_vs_MS.NoTrt_F |
| MEIOC    | 0.91059 | -0.2625 | 0.655 | 0.69 | 1 MS.Trt_vs_MS.NoTrt_F |
| ORC1     | 0.91121 | 0.31532 | 0.245 | 0.27 | 1 MS.Trt_vs_MS.NoTrt_F |
| PNPO     | 0.91132 | -0.3069 | 0.658 | 0.67 | 1 MS.Trt_vs_MS.NoTrt_F |
| GSDMA    | 0.91185 | 0.36721 | 0.662 | 0.68 | 1 MS.Trt_vs_MS.NoTrt_F |
| KNL1     | 0.91287 | 0.3161  | 0.432 | 0.43 | 1 MS.Trt_vs_MS.NoTrt_F |
| SPACA9   | 0.91349 | -0.3828 | 0.644 | 0.64 | 1 MS.Trt_vs_MS.NoTrt_F |
| PRKCA    | 0.91534 | 0.29908 | 0.745 | 0.76 | 1 MS.Trt_vs_MS.NoTrt_F |
| TM2D3    | 0.91745 | -0.2534 | 0.777 | 0.79 | 1 MS.Trt_vs_MS.NoTrt_F |
| CEP135   | 0.91753 | -0.6042 | 0.799 | 0.8  | 1 MS.Trt_vs_MS.NoTrt_F |
| ARF6     | 0.91799 | 0.66364 | 0.701 | 0.76 | 1 MS.Trt_vs_MS.NoTrt_F |
| ATP2A2   | 0.91939 | 0.71163 | 0.748 | 0.72 | 1 MS.Trt_vs_MS.NoTrt_F |
| ARID3A   | 0.91988 | -0.299  | 0.594 | 0.58 | 1 MS.Trt_vs_MS.NoTrt_F |
| C12orf60 | 0.92196 | 0.38115 | 0.619 | 0.62 | 1 MS.Trt_vs_MS.NoTrt_F |
| TXLNA    | 0.92201 | 0.66096 | 0.385 | 0.44 | 1 MS.Trt_vs_MS.NoTrt_F |
| RGS12    | 0.92284 | -0.9961 | 0.86  | 0.85 | 1 MS.Trt_vs_MS.NoTrt_F |
| STAT4    | 0.92297 | 0.65639 | 0.363 | 0.39 | 1 MS.Trt_vs_MS.NoTrt_F |
| CDC73    | 0.92317 | 0.49927 | 0.572 | 0.55 | 1 MS.Trt_vs_MS.NoTrt_F |
| MYL6B    | 0.92403 | 0.41547 | 0.572 | 0.62 | 1 MS.Trt_vs_MS.NoTrt_F |
| TBCCD1   | 0.92453 | 0.49564 | 0.406 | 0.41 | 1 MS.Trt_vs_MS.NoTrt_F |
| TTC37    | 0.92515 | 0.27787 | 0.414 | 0.43 | 1 MS.Trt_vs_MS.NoTrt_F |
| TXNL1    | 0.9258  | 0.34663 | 0.662 | 0.71 | 1 MS.Trt_vs_MS.NoTrt_F |
| TIMM23B  | 0.92771 | 0.50606 | 0.608 | 0.66 | 1 MS.Trt_vs_MS.NoTrt_F |

|            |         |         |       |      |                        |
|------------|---------|---------|-------|------|------------------------|
| ACY1       | 0.92881 | 0.51648 | 0.644 | 0.62 | 1 MS.Trt_vs_MS.NoTrt_F |
| WDR90      | 0.93016 | 0.63652 | 0.878 | 0.91 | 1 MS.Trt_vs_MS.NoTrt_F |
| ZNF14      | 0.93024 | 1.67306 | 0.396 | 0.41 | 1 MS.Trt_vs_MS.NoTrt_F |
| LASP1      | 0.93058 | -0.402  | 0.809 | 0.82 | 1 MS.Trt_vs_MS.NoTrt_F |
| IDH2       | 0.93205 | 0.81469 | 0.511 | 0.56 | 1 MS.Trt_vs_MS.NoTrt_F |
| UBE2W      | 0.9327  | 0.35646 | 0.658 | 0.7  | 1 MS.Trt_vs_MS.NoTrt_F |
| AGO2       | 0.93322 | 0.95595 | 0.392 | 0.45 | 1 MS.Trt_vs_MS.NoTrt_F |
| TANC1      | 0.93468 | 0.2918  | 0.378 | 0.39 | 1 MS.Trt_vs_MS.NoTrt_F |
| PIP4K2A    | 0.93505 | 0.46298 | 0.824 | 0.91 | 1 MS.Trt_vs_MS.NoTrt_F |
| AC012314.1 | 0.93531 | 0.31939 | 0.691 | 0.88 | 1 MS.Trt_vs_MS.NoTrt_F |
| AC012314.1 | 0.93531 | 0.31939 | 0.691 | 0.88 | 1 MS.Trt_vs_MS.NoTrt_F |
| AC012314.1 | 0.93531 | 0.31939 | 0.691 | 0.88 | 1 MS.Trt_vs_MS.NoTrt_F |
| AC012314.2 | 0.93531 | 0.31939 | 0.691 | 0.88 | 1 MS.Trt_vs_MS.NoTrt_F |
| AC012314.4 | 0.93531 | 0.31939 | 0.691 | 0.88 | 1 MS.Trt_vs_MS.NoTrt_F |
| AC012314.5 | 0.93531 | 0.31939 | 0.691 | 0.88 | 1 MS.Trt_vs_MS.NoTrt_F |
| CD36       | 0.9358  | 1.40256 | 0.55  | 0.53 | 1 MS.Trt_vs_MS.NoTrt_F |
| EXT1       | 0.93604 | 0.49072 | 0.201 | 0.21 | 1 MS.Trt_vs_MS.NoTrt_F |
| RP11-231C1 | 0.93624 | 0.54585 | 0.694 | 0.79 | 1 MS.Trt_vs_MS.NoTrt_F |
| NALCN      | 0.93661 | -0.3416 | 0.543 | 0.54 | 1 MS.Trt_vs_MS.NoTrt_F |
| POC1B      | 0.93735 | 0.6054  | 0.755 | 0.83 | 1 MS.Trt_vs_MS.NoTrt_F |
| SPDYE3     | 0.93812 | 0.31256 | 0.59  | 0.56 | 1 MS.Trt_vs_MS.NoTrt_F |
| S1PR5      | 0.9387  | 0.28414 | 0.129 | 0.13 | 1 MS.Trt_vs_MS.NoTrt_F |
| TOMM40     | 0.93924 | -0.3736 | 0.619 | 0.65 | 1 MS.Trt_vs_MS.NoTrt_F |
| METTL21B   | 0.93975 | 0.83127 | 0.5   | 0.53 | 1 MS.Trt_vs_MS.NoTrt_F |
| LPGAT1     | 0.94048 | 0.74743 | 0.529 | 0.51 | 1 MS.Trt_vs_MS.NoTrt_F |
| ZSCAN5A    | 0.94055 | -0.2706 | 0.784 | 0.82 | 1 MS.Trt_vs_MS.NoTrt_F |
| PGAM5      | 0.94132 | -0.3221 | 0.77  | 0.79 | 1 MS.Trt_vs_MS.NoTrt_F |
| SLC7A13    | 0.94177 | 0.44781 | 0.155 | 0.17 | 1 MS.Trt_vs_MS.NoTrt_F |
| IFFO1      | 0.94178 | 0.82021 | 0.464 | 0.46 | 1 MS.Trt_vs_MS.NoTrt_F |
| ITPKB      | 0.94278 | 0.76697 | 0.597 | 0.62 | 1 MS.Trt_vs_MS.NoTrt_F |
| ATP6V1D    | 0.94289 | 0.31551 | 0.586 | 0.66 | 1 MS.Trt_vs_MS.NoTrt_F |
| SLC30A6    | 0.94295 | 0.33771 | 0.604 | 0.65 | 1 MS.Trt_vs_MS.NoTrt_F |
| GTPBP3     | 0.94337 | 0.26194 | 0.723 | 0.75 | 1 MS.Trt_vs_MS.NoTrt_F |
| UGDH       | 0.9436  | -0.344  | 0.64  | 0.67 | 1 MS.Trt_vs_MS.NoTrt_F |
| EXOSC2     | 0.94474 | 0.31003 | 0.755 | 0.78 | 1 MS.Trt_vs_MS.NoTrt_F |
| DCUN1D5    | 0.94548 | -0.2963 | 0.468 | 0.45 | 1 MS.Trt_vs_MS.NoTrt_F |
| CNTLN      | 0.94581 | 0.33823 | 0.349 | 0.36 | 1 MS.Trt_vs_MS.NoTrt_F |
| FGD2       | 0.94582 | 0.68325 | 0.759 | 0.78 | 1 MS.Trt_vs_MS.NoTrt_F |
| OASL       | 0.94655 | 0.87529 | 0.266 | 0.27 | 1 MS.Trt_vs_MS.NoTrt_F |
| JKAMP      | 0.94668 | -0.4936 | 0.795 | 0.85 | 1 MS.Trt_vs_MS.NoTrt_F |

|          |         |         |       |      |                        |
|----------|---------|---------|-------|------|------------------------|
| ELP3     | 0.94715 | -0.3758 | 0.536 | 0.5  | 1 MS.Trt_vs_MS.NoTrt_F |
| SNX30    | 0.94722 | 0.33275 | 0.482 | 0.5  | 1 MS.Trt_vs_MS.NoTrt_F |
| TIPIN    | 0.94728 | 0.721   | 0.612 | 0.62 | 1 MS.Trt_vs_MS.NoTrt_F |
| DND1     | 0.94756 | 0.3337  | 0.104 | 0.11 | 1 MS.Trt_vs_MS.NoTrt_F |
| RNF125   | 0.94773 | 0.33178 | 0.91  | 0.95 | 1 MS.Trt_vs_MS.NoTrt_F |
| TGFBRAP1 | 0.94927 | 0.37738 | 0.55  | 0.55 | 1 MS.Trt_vs_MS.NoTrt_F |
| MLF1     | 0.94969 | 0.72219 | 0.381 | 0.41 | 1 MS.Trt_vs_MS.NoTrt_F |
| HARBI1   | 0.94989 | 0.75236 | 0.604 | 0.62 | 1 MS.Trt_vs_MS.NoTrt_F |
| INPP4A   | 0.95079 | 0.47381 | 0.453 | 0.46 | 1 MS.Trt_vs_MS.NoTrt_F |
| ZNF658   | 0.95104 | 0.59798 | 0.216 | 0.22 | 1 MS.Trt_vs_MS.NoTrt_F |
| DBN1     | 0.95229 | 0.6956  | 0.234 | 0.24 | 1 MS.Trt_vs_MS.NoTrt_F |
| HEATR4   | 0.95396 | 0.9968  | 0.396 | 0.44 | 1 MS.Trt_vs_MS.NoTrt_F |
| EXOSC6   | 0.9549  | 0.71976 | 0.899 | 0.96 | 1 MS.Trt_vs_MS.NoTrt_F |
| ZSCAN18  | 0.95563 | 0.53481 | 0.694 | 0.69 | 1 MS.Trt_vs_MS.NoTrt_F |
| FKTN     | 0.95608 | 0.62049 | 0.209 | 0.22 | 1 MS.Trt_vs_MS.NoTrt_F |
| CD180    | 0.957   | 0.93504 | 0.295 | 0.3  | 1 MS.Trt_vs_MS.NoTrt_F |
| CCDC124  | 0.95776 | 0.26113 | 0.522 | 0.54 | 1 MS.Trt_vs_MS.NoTrt_F |
| NELFCD   | 0.95859 | 0.67042 | 0.594 | 0.59 | 1 MS.Trt_vs_MS.NoTrt_F |
| MYO7A    | 0.95954 | 0.47304 | 0.385 | 0.41 | 1 MS.Trt_vs_MS.NoTrt_F |
| WDPCP    | 0.96008 | 0.5776  | 0.95  | 0.96 | 1 MS.Trt_vs_MS.NoTrt_F |
| PLAC8    | 0.96172 | 0.9526  | 0.723 | 0.79 | 1 MS.Trt_vs_MS.NoTrt_F |
| IFT80    | 0.96178 | 0.91568 | 0.752 | 0.79 | 1 MS.Trt_vs_MS.NoTrt_F |
| TNRC18   | 0.96217 | 0.44634 | 0.777 | 0.81 | 1 MS.Trt_vs_MS.NoTrt_F |
| ADPRH    | 0.96247 | 3.26719 | 0.104 | 0.11 | 1 MS.Trt_vs_MS.NoTrt_F |
| ZBTB20   | 0.96271 | 0.44894 | 0.752 | 0.8  | 1 MS.Trt_vs_MS.NoTrt_F |
| PANK3    | 0.96303 | 0.80527 | 0.424 | 0.44 | 1 MS.Trt_vs_MS.NoTrt_F |
| PCCB     | 0.96309 | 0.37215 | 0.626 | 0.66 | 1 MS.Trt_vs_MS.NoTrt_F |
| ZNF772   | 0.96447 | 1.02642 | 0.507 | 0.52 | 1 MS.Trt_vs_MS.NoTrt_F |
| CD81     | 0.9645  | 1.19898 | 0.101 | 0.11 | 1 MS.Trt_vs_MS.NoTrt_F |
| GSN      | 0.96485 | 0.77901 | 0.637 | 0.64 | 1 MS.Trt_vs_MS.NoTrt_F |
| PLXDC1   | 0.96531 | 1.08824 | 0.694 | 0.75 | 1 MS.Trt_vs_MS.NoTrt_F |
| SPTLC2   | 0.96537 | 0.3214  | 0.719 | 0.74 | 1 MS.Trt_vs_MS.NoTrt_F |
| TDRD3    | 0.96556 | 0.72186 | 0.543 | 0.55 | 1 MS.Trt_vs_MS.NoTrt_F |
| PIK3C2B  | 0.96636 | -0.333  | 0.45  | 0.42 | 1 MS.Trt_vs_MS.NoTrt_F |
| SLC23A3  | 0.9667  | 1.11766 | 0.46  | 0.49 | 1 MS.Trt_vs_MS.NoTrt_F |
| FBXO45   | 0.96719 | 0.88296 | 0.471 | 0.46 | 1 MS.Trt_vs_MS.NoTrt_F |
| OBSL1    | 0.9672  | 0.27222 | 0.187 | 0.19 | 1 MS.Trt_vs_MS.NoTrt_F |
| SH3YL1   | 0.96724 | -0.5507 | 0.777 | 0.71 | 1 MS.Trt_vs_MS.NoTrt_F |
| MGA      | 0.96835 | -0.316  | 0.881 | 0.89 | 1 MS.Trt_vs_MS.NoTrt_F |
| EXOC5    | 0.96915 | 0.97165 | 0.439 | 0.47 | 1 MS.Trt_vs_MS.NoTrt_F |

|          |         |         |       |      |   |                      |
|----------|---------|---------|-------|------|---|----------------------|
| MSS51    | 0.96918 | -0.8115 | 0.536 | 0.56 | 1 | MS.Trt_vs_MS.NoTrt_F |
| BRDT     | 0.96939 | 0.25162 | 0.554 | 0.59 | 1 | MS.Trt_vs_MS.NoTrt_F |
| NBEAL1   | 0.96976 | 0.49088 | 0.856 | 0.91 | 1 | MS.Trt_vs_MS.NoTrt_F |
| FNIP1    | 0.97029 | 0.83489 | 0.633 | 0.67 | 1 | MS.Trt_vs_MS.NoTrt_F |
| DNAJA3   | 0.97155 | 0.33281 | 0.91  | 0.95 | 1 | MS.Trt_vs_MS.NoTrt_F |
| EIF4EBP2 | 0.97286 | 0.38358 | 0.687 | 0.69 | 1 | MS.Trt_vs_MS.NoTrt_F |
| ZNF554   | 0.97299 | 0.29946 | 0.932 | 0.96 | 1 | MS.Trt_vs_MS.NoTrt_F |
| CSNK1A1  | 0.97554 | 0.4359  | 0.885 | 0.85 | 1 | MS.Trt_vs_MS.NoTrt_F |
| KBTBD12  | 0.97677 | 0.25889 | 0.385 | 0.4  | 1 | MS.Trt_vs_MS.NoTrt_F |
| HAVCR2   | 0.97692 | 0.3114  | 0.615 | 0.64 | 1 | MS.Trt_vs_MS.NoTrt_F |
| FAM161B  | 0.977   | 0.63346 | 0.396 | 0.41 | 1 | MS.Trt_vs_MS.NoTrt_F |
| TMEM107  | 0.97735 | 0.86645 | 0.532 | 0.58 | 1 | MS.Trt_vs_MS.NoTrt_F |
| ZNF808   | 0.97938 | 1.40555 | 0.536 | 0.54 | 1 | MS.Trt_vs_MS.NoTrt_F |
| FOCAD    | 0.98017 | 0.69586 | 0.522 | 0.52 | 1 | MS.Trt_vs_MS.NoTrt_F |
| KIF27    | 0.98117 | 0.86657 | 0.353 | 0.36 | 1 | MS.Trt_vs_MS.NoTrt_F |
| ADM2     | 0.98117 | -0.3425 | 0.356 | 0.35 | 1 | MS.Trt_vs_MS.NoTrt_F |
| A1BG     | 0.9813  | 0.32864 | 0.892 | 0.87 | 1 | MS.Trt_vs_MS.NoTrt_F |
| ELMSAN1  | 0.98171 | 0.83021 | 0.727 | 0.75 | 1 | MS.Trt_vs_MS.NoTrt_F |
| UGT8     | 0.98469 | 0.48717 | 0.46  | 0.48 | 1 | MS.Trt_vs_MS.NoTrt_F |
| RHOF     | 0.98669 | 0.40913 | 0.741 | 0.78 | 1 | MS.Trt_vs_MS.NoTrt_F |
| IBA57    | 0.9876  | 0.56556 | 0.813 | 0.86 | 1 | MS.Trt_vs_MS.NoTrt_F |
| GLTSCR1  | 0.98787 | 0.40605 | 0.619 | 0.64 | 1 | MS.Trt_vs_MS.NoTrt_F |
| NEU1     | 0.98821 | 1.00233 | 0.651 | 0.62 | 1 | MS.Trt_vs_MS.NoTrt_F |
| GMPS     | 0.98847 | 0.48491 | 0.835 | 0.87 | 1 | MS.Trt_vs_MS.NoTrt_F |
| PARD6G   | 0.98905 | 0.62991 | 0.511 | 0.55 | 1 | MS.Trt_vs_MS.NoTrt_F |
| GMPR     | 0.98908 | 0.33337 | 0.356 | 0.4  | 1 | MS.Trt_vs_MS.NoTrt_F |
| BFAR     | 0.98947 | 0.57572 | 0.543 | 0.58 | 1 | MS.Trt_vs_MS.NoTrt_F |
| UNC45A   | 0.98949 | 0.31206 | 0.687 | 0.72 | 1 | MS.Trt_vs_MS.NoTrt_F |
| RBP7     | 0.98963 | 1.30453 | 0.331 | 0.32 | 1 | MS.Trt_vs_MS.NoTrt_F |
| KLRD1    | 0.98965 | 0.54575 | 0.975 | 0.98 | 1 | MS.Trt_vs_MS.NoTrt_F |
| ARIH2    | 0.98966 | 0.51449 | 0.968 | 0.99 | 1 | MS.Trt_vs_MS.NoTrt_F |
| RGS17    | 0.98983 | 0.43439 | 0.496 | 0.51 | 1 | MS.Trt_vs_MS.NoTrt_F |
| DBR1     | 0.99017 | 0.42285 | 0.788 | 0.81 | 1 | MS.Trt_vs_MS.NoTrt_F |
| ADAM15   | 0.99202 | 0.32786 | 0.374 | 0.36 | 1 | MS.Trt_vs_MS.NoTrt_F |
| POLR2D   | 0.99219 | -0.3574 | 0.784 | 0.77 | 1 | MS.Trt_vs_MS.NoTrt_F |
| GNG7     | 0.99241 | -0.51   | 0.435 | 0.46 | 1 | MS.Trt_vs_MS.NoTrt_F |
| MROH1    | 0.99298 | -0.6764 | 0.547 | 0.48 | 1 | MS.Trt_vs_MS.NoTrt_F |
| KIF1BP   | 0.9936  | 0.4052  | 0.719 | 0.76 | 1 | MS.Trt_vs_MS.NoTrt_F |
| CCDC30   | 0.99396 | -0.3479 | 0.871 | 0.93 | 1 | MS.Trt_vs_MS.NoTrt_F |
| TCTA     | 0.99436 | 0.43273 | 0.583 | 0.64 | 1 | MS.Trt_vs_MS.NoTrt_F |

|           |          |         |       |      |          |                      |
|-----------|----------|---------|-------|------|----------|----------------------|
| AHCY      | 0.9963   | 1.98788 | 0.147 | 0.16 | 1        | MS.Trt_vs_MS.NoTrt_F |
| RASGEF1B  | 0.99651  | 0.49368 | 0.698 | 0.76 | 1        | MS.Trt_vs_MS.NoTrt_F |
| ADAMTS1   | 0.99654  | 0.472   | 0.439 | 0.48 | 1        | MS.Trt_vs_MS.NoTrt_F |
| UBE2G2    | 0.99709  | 0.41498 | 0.705 | 0.72 | 1        | MS.Trt_vs_MS.NoTrt_F |
| FKBP9     | 0.99719  | 0.53667 | 0.457 | 0.48 | 1        | MS.Trt_vs_MS.NoTrt_F |
| OPN3      | 0.99719  | -0.7263 | 0.313 | 0.3  | 1        | MS.Trt_vs_MS.NoTrt_F |
| PLBD1     | 0.99783  | -0.6164 | 0.482 | 0.48 | 1        | MS.Trt_vs_MS.NoTrt_F |
| SMARCAL1  | 0.99854  | 0.66325 | 0.691 | 0.74 | 1        | MS.Trt_vs_MS.NoTrt_F |
| ZIK1      | 0.99863  | 1.34723 | 0.335 | 0.33 | 1        | MS.Trt_vs_MS.NoTrt_F |
| PTRH2     | 1        | 1.04764 | 0.18  | 0.18 | 1        | MS.Trt_vs_MS.NoTrt_F |
| HLA-B     | 9.08E-30 | -0.7671 | 0.83  | 0.98 | 1.45E-25 | MS.Trt_vs_MS.NoTrt_B |
| RPS4Y1    | 2.18E-23 | -4.7027 | 0.063 | 0.35 | 3.48E-19 | MS.Trt_vs_MS.NoTrt_B |
| RPL13A    | 1.66E-22 | -0.6421 | 0.743 | 1    | 2.65E-18 | MS.Trt_vs_MS.NoTrt_B |
| CD99      | 3.88E-21 | -0.8095 | 0.288 | 0.71 | 6.19E-17 | MS.Trt_vs_MS.NoTrt_B |
| S100A4    | 2.04E-20 | -0.8267 | 0.388 | 0.8  | 3.26E-16 | MS.Trt_vs_MS.NoTrt_B |
| RPL27A    | 2.07E-19 | -0.6265 | 0.76  | 0.98 | 3.30E-15 | MS.Trt_vs_MS.NoTrt_B |
| MT-ND4L   | 8.66E-19 | 1.46742 | 0.985 | 0.99 | 1.38E-14 | MS.Trt_vs_MS.NoTrt_B |
| RPL36     | 9.59E-19 | -0.6113 | 0.458 | 0.87 | 1.53E-14 | MS.Trt_vs_MS.NoTrt_B |
| EEF2      | 1.22E-18 | -0.6186 | 0.773 | 0.99 | 1.96E-14 | MS.Trt_vs_MS.NoTrt_B |
| RPS27A    | 2.36E-18 | -0.5547 | 0.59  | 0.97 | 3.76E-14 | MS.Trt_vs_MS.NoTrt_B |
| RPS16     | 3.82E-18 | -0.5884 | 0.601 | 0.92 | 6.11E-14 | MS.Trt_vs_MS.NoTrt_B |
| RPL7A     | 7.51E-18 | -0.5782 | 0.608 | 0.97 | 1.20E-13 | MS.Trt_vs_MS.NoTrt_B |
| RPL37A    | 2.01E-17 | -0.558  | 0.603 | 0.94 | 3.22E-13 | MS.Trt_vs_MS.NoTrt_B |
| FGF23     | 2.08E-17 | 0.51084 | 0.791 | 0.54 | 3.33E-13 | MS.Trt_vs_MS.NoTrt_B |
| RPL24     | 2.20E-17 | -0.5859 | 0.664 | 0.91 | 3.51E-13 | MS.Trt_vs_MS.NoTrt_B |
| RPL36A    | 1.24E-16 | -0.5904 | 0.556 | 0.84 | 1.97E-12 | MS.Trt_vs_MS.NoTrt_B |
| RPS3      | 1.45E-16 | -0.5014 | 0.8   | 1    | 2.31E-12 | MS.Trt_vs_MS.NoTrt_B |
| FXYD5     | 2.84E-16 | -0.5862 | 0.54  | 0.89 | 4.54E-12 | MS.Trt_vs_MS.NoTrt_B |
| CTLA4     | 3.40E-16 | -1.1243 | 0.131 | 0.41 | 5.44E-12 | MS.Trt_vs_MS.NoTrt_B |
| TAC4      | 4.30E-16 | -0.788  | 0.488 | 0.74 | 6.86E-12 | MS.Trt_vs_MS.NoTrt_B |
| TMSB10    | 4.90E-16 | -0.5663 | 0.784 | 1    | 7.83E-12 | MS.Trt_vs_MS.NoTrt_B |
| RPL28     | 6.54E-16 | -0.4774 | 0.708 | 1    | 1.05E-11 | MS.Trt_vs_MS.NoTrt_B |
| RPL37     | 9.12E-16 | -0.3166 | 0.858 | 0.99 | 1.46E-11 | MS.Trt_vs_MS.NoTrt_B |
| COMMD1    | 1.66E-15 | -0.3082 | 0.42  | 0.8  | 2.65E-11 | MS.Trt_vs_MS.NoTrt_B |
| ANXA2     | 1.67E-15 | -0.7003 | 0.542 | 0.82 | 2.66E-11 | MS.Trt_vs_MS.NoTrt_B |
| RAN       | 1.93E-15 | -0.5889 | 0.325 | 0.68 | 3.08E-11 | MS.Trt_vs_MS.NoTrt_B |
| CSGALNACT | 2.03E-15 | -0.7741 | 0.37  | 0.69 | 3.25E-11 | MS.Trt_vs_MS.NoTrt_B |
| RPS23     | 2.81E-15 | -0.4648 | 0.623 | 0.97 | 4.49E-11 | MS.Trt_vs_MS.NoTrt_B |
| HOXB2     | 3.63E-15 | -1.264  | 0.052 | 0.27 | 5.81E-11 | MS.Trt_vs_MS.NoTrt_B |
| RPS12     | 6.52E-15 | -0.4954 | 0.673 | 0.98 | 1.04E-10 | MS.Trt_vs_MS.NoTrt_B |

|            |          |         |       |      |          |                      |
|------------|----------|---------|-------|------|----------|----------------------|
| TOMM7      | 1.68E-14 | -0.3352 | 0.414 | 0.75 | 2.68E-10 | MS.Trt_vs_MS.NoTrt_B |
| RPLP2      | 1.80E-14 | -0.4846 | 0.571 | 0.96 | 2.87E-10 | MS.Trt_vs_MS.NoTrt_B |
| RPL30      | 1.94E-14 | -0.4353 | 0.699 | 0.97 | 3.10E-10 | MS.Trt_vs_MS.NoTrt_B |
| PKM        | 3.18E-14 | -0.4513 | 0.412 | 0.76 | 5.07E-10 | MS.Trt_vs_MS.NoTrt_B |
| RPL22      | 4.02E-14 | -0.3828 | 0.451 | 0.8  | 6.42E-10 | MS.Trt_vs_MS.NoTrt_B |
| ANXA11     | 4.55E-14 | -0.624  | 0.656 | 0.88 | 7.27E-10 | MS.Trt_vs_MS.NoTrt_B |
| MT-CO2     | 5.19E-14 | 1.04422 | 0.983 | 1    | 8.30E-10 | MS.Trt_vs_MS.NoTrt_B |
| RPS28      | 7.17E-14 | -0.5258 | 0.569 | 0.94 | 1.15E-09 | MS.Trt_vs_MS.NoTrt_B |
| EHD1       | 7.34E-14 | -0.9308 | 0.2   | 0.49 | 1.17E-09 | MS.Trt_vs_MS.NoTrt_B |
| LSP1       | 8.96E-14 | -0.5224 | 0.54  | 0.87 | 1.43E-09 | MS.Trt_vs_MS.NoTrt_B |
| CSTB       | 1.22E-13 | -0.3258 | 0.322 | 0.65 | 1.95E-09 | MS.Trt_vs_MS.NoTrt_B |
| TMBIM6     | 1.28E-13 | -0.4766 | 0.636 | 0.92 | 2.05E-09 | MS.Trt_vs_MS.NoTrt_B |
| XRCC6      | 1.58E-13 | -0.4347 | 0.427 | 0.76 | 2.53E-09 | MS.Trt_vs_MS.NoTrt_B |
| RPSA       | 1.84E-13 | -0.5601 | 0.556 | 0.83 | 2.94E-09 | MS.Trt_vs_MS.NoTrt_B |
| NACA       | 2.13E-13 | -0.3118 | 0.802 | 0.98 | 3.40E-09 | MS.Trt_vs_MS.NoTrt_B |
| RPL19      | 2.52E-13 | -0.4867 | 0.654 | 0.94 | 4.02E-09 | MS.Trt_vs_MS.NoTrt_B |
| RPL27      | 2.63E-13 | -0.286  | 0.512 | 0.89 | 4.20E-09 | MS.Trt_vs_MS.NoTrt_B |
| TMEM50A    | 2.81E-13 | -0.5817 | 0.192 | 0.48 | 4.48E-09 | MS.Trt_vs_MS.NoTrt_B |
| FTH1       | 2.95E-13 | -0.4833 | 0.606 | 0.93 | 4.72E-09 | MS.Trt_vs_MS.NoTrt_B |
| CASP8      | 4.34E-13 | -0.6692 | 0.808 | 0.95 | 6.93E-09 | MS.Trt_vs_MS.NoTrt_B |
| GAPDH      | 5.04E-13 | -0.5695 | 0.61  | 0.89 | 8.06E-09 | MS.Trt_vs_MS.NoTrt_B |
| WDR45      | 5.99E-13 | -0.7539 | 0.429 | 0.72 | 9.56E-09 | MS.Trt_vs_MS.NoTrt_B |
| MT-CO1     | 7.19E-13 | -0.3184 | 0.965 | 1    | 1.15E-08 | MS.Trt_vs_MS.NoTrt_B |
| ATXN10     | 7.51E-13 | -0.2685 | 0.344 | 0.65 | 1.20E-08 | MS.Trt_vs_MS.NoTrt_B |
| CD53       | 8.39E-13 | -0.4835 | 0.468 | 0.82 | 1.34E-08 | MS.Trt_vs_MS.NoTrt_B |
| NDUFA4     | 8.72E-13 | -0.2762 | 0.462 | 0.75 | 1.39E-08 | MS.Trt_vs_MS.NoTrt_B |
| RASA4      | 9.08E-13 | -0.2835 | 0.505 | 0.77 | 1.45E-08 | MS.Trt_vs_MS.NoTrt_B |
| RPL18      | 9.12E-13 | -0.4078 | 0.545 | 0.92 | 1.46E-08 | MS.Trt_vs_MS.NoTrt_B |
| CDC37      | 9.53E-13 | -0.5756 | 0.253 | 0.56 | 1.52E-08 | MS.Trt_vs_MS.NoTrt_B |
| GBP5       | 1.13E-12 | -0.5387 | 0.484 | 0.78 | 1.80E-08 | MS.Trt_vs_MS.NoTrt_B |
| TAGLN2     | 1.17E-12 | -0.6194 | 0.407 | 0.71 | 1.86E-08 | MS.Trt_vs_MS.NoTrt_B |
| RAC2       | 1.27E-12 | -0.4321 | 0.566 | 0.87 | 2.02E-08 | MS.Trt_vs_MS.NoTrt_B |
| RPL5       | 1.37E-12 | -0.42   | 0.649 | 0.96 | 2.19E-08 | MS.Trt_vs_MS.NoTrt_B |
| UQCR11     | 1.72E-12 | -0.4057 | 0.473 | 0.77 | 2.75E-08 | MS.Trt_vs_MS.NoTrt_B |
| NME2       | 1.93E-12 | -0.4514 | 0.344 | 0.65 | 3.08E-08 | MS.Trt_vs_MS.NoTrt_B |
| VIM        | 2.00E-12 | -0.4296 | 0.641 | 0.92 | 3.19E-08 | MS.Trt_vs_MS.NoTrt_B |
| RPS13      | 2.03E-12 | -0.3239 | 0.688 | 0.96 | 3.24E-08 | MS.Trt_vs_MS.NoTrt_B |
| CTB-133G6. | 2.06E-12 | -0.6907 | 0.179 | 0.45 | 3.29E-08 | MS.Trt_vs_MS.NoTrt_B |
| PTPRCAP    | 2.50E-12 | -0.516  | 0.462 | 0.78 | 3.99E-08 | MS.Trt_vs_MS.NoTrt_B |
| IKZF3      | 2.74E-12 | -0.4422 | 0.856 | 0.97 | 4.38E-08 | MS.Trt_vs_MS.NoTrt_B |



|          |          |         |       |      |          |                      |
|----------|----------|---------|-------|------|----------|----------------------|
| UBE2D2   | 2.85E-12 | -0.4827 | 0.29  | 0.6  | 4.56E-08 | MS.Trt_vs_MS.NoTrt_B |
| EEF1A1   | 3.79E-12 | -0.2996 | 0.959 | 1    | 6.06E-08 | MS.Trt_vs_MS.NoTrt_B |
| S100A10  | 4.09E-12 | -0.4443 | 0.431 | 0.76 | 6.53E-08 | MS.Trt_vs_MS.NoTrt_B |
| EIF4A1   | 4.26E-12 | -0.514  | 0.375 | 0.68 | 6.80E-08 | MS.Trt_vs_MS.NoTrt_B |
| LIME1    | 5.71E-12 | -0.4464 | 0.29  | 0.62 | 9.12E-08 | MS.Trt_vs_MS.NoTrt_B |
| RUNDC3B  | 6.07E-12 | -0.5488 | 0.198 | 0.44 | 9.69E-08 | MS.Trt_vs_MS.NoTrt_B |
| HS3ST3B1 | 6.25E-12 | -0.2662 | 0.298 | 0.6  | 9.99E-08 | MS.Trt_vs_MS.NoTrt_B |
| IL32     | 6.90E-12 | -0.4147 | 0.782 | 0.97 | 1.10E-07 | MS.Trt_vs_MS.NoTrt_B |
| RPL13    | 6.93E-12 | -0.4034 | 0.791 | 0.99 | 1.11E-07 | MS.Trt_vs_MS.NoTrt_B |
| RPL23    | 7.28E-12 | -0.2952 | 0.658 | 0.9  | 1.16E-07 | MS.Trt_vs_MS.NoTrt_B |
| CD247    | 9.45E-12 | -0.41   | 0.329 | 0.63 | 1.51E-07 | MS.Trt_vs_MS.NoTrt_B |
| H3F3A    | 9.72E-12 | -0.2995 | 0.508 | 0.86 | 1.55E-07 | MS.Trt_vs_MS.NoTrt_B |
| CCR6     | 9.92E-12 | -0.5003 | 0.257 | 0.52 | 1.58E-07 | MS.Trt_vs_MS.NoTrt_B |
| LAPTM5   | 1.00E-11 | -0.3884 | 0.508 | 0.83 | 1.60E-07 | MS.Trt_vs_MS.NoTrt_B |
| PRDX1    | 1.48E-11 | -0.5592 | 0.407 | 0.67 | 2.36E-07 | MS.Trt_vs_MS.NoTrt_B |
| RPS25    | 2.08E-11 | -0.3424 | 0.61  | 0.95 | 3.32E-07 | MS.Trt_vs_MS.NoTrt_B |
| SLC25A6  | 2.09E-11 | -0.4332 | 0.44  | 0.76 | 3.34E-07 | MS.Trt_vs_MS.NoTrt_B |
| EEF1B2   | 2.19E-11 | -0.4107 | 0.375 | 0.7  | 3.49E-07 | MS.Trt_vs_MS.NoTrt_B |
| C9orf16  | 2.34E-11 | -0.5231 | 0.148 | 0.4  | 3.74E-07 | MS.Trt_vs_MS.NoTrt_B |
| RPS8     | 2.41E-11 | -0.3908 | 0.854 | 1    | 3.85E-07 | MS.Trt_vs_MS.NoTrt_B |
| ANXA6    | 2.50E-11 | -0.6236 | 0.34  | 0.64 | 4.00E-07 | MS.Trt_vs_MS.NoTrt_B |
| LDHB     | 2.89E-11 | -0.4215 | 0.575 | 0.91 | 4.61E-07 | MS.Trt_vs_MS.NoTrt_B |
| PSMD8    | 3.08E-11 | -0.5562 | 0.462 | 0.73 | 4.92E-07 | MS.Trt_vs_MS.NoTrt_B |
| HCST     | 3.25E-11 | -0.6281 | 0.216 | 0.48 | 5.19E-07 | MS.Trt_vs_MS.NoTrt_B |
| STMN3    | 3.42E-11 | -0.4286 | 0.155 | 0.39 | 5.47E-07 | MS.Trt_vs_MS.NoTrt_B |
| MSN      | 3.48E-11 | -0.367  | 0.453 | 0.74 | 5.55E-07 | MS.Trt_vs_MS.NoTrt_B |
| CD52     | 3.50E-11 | -0.3679 | 0.643 | 0.94 | 5.59E-07 | MS.Trt_vs_MS.NoTrt_B |
| RPL31    | 3.69E-11 | -0.2967 | 0.593 | 0.94 | 5.90E-07 | MS.Trt_vs_MS.NoTrt_B |
| NONO     | 3.71E-11 | -0.4099 | 0.49  | 0.78 | 5.93E-07 | MS.Trt_vs_MS.NoTrt_B |
| RPL15    | 4.13E-11 | -0.2752 | 0.882 | 1    | 6.60E-07 | MS.Trt_vs_MS.NoTrt_B |
| CD5      | 4.33E-11 | -0.4254 | 0.338 | 0.65 | 6.92E-07 | MS.Trt_vs_MS.NoTrt_B |
| ARPC3    | 6.65E-11 | -0.3827 | 0.331 | 0.64 | 1.06E-06 | MS.Trt_vs_MS.NoTrt_B |
| TBC1D4   | 7.27E-11 | -0.4045 | 0.237 | 0.51 | 1.16E-06 | MS.Trt_vs_MS.NoTrt_B |
| PSME1    | 7.38E-11 | -0.3703 | 0.464 | 0.76 | 1.18E-06 | MS.Trt_vs_MS.NoTrt_B |
| PBX1     | 7.41E-11 | -0.3348 | 0.728 | 0.95 | 1.18E-06 | MS.Trt_vs_MS.NoTrt_B |
| ATP2B4   | 7.64E-11 | -0.3595 | 0.344 | 0.62 | 1.22E-06 | MS.Trt_vs_MS.NoTrt_B |
| TXNIP    | 8.08E-11 | -0.3632 | 0.691 | 0.94 | 1.29E-06 | MS.Trt_vs_MS.NoTrt_B |
| CAPN2    | 1.01E-10 | -0.3311 | 0.617 | 0.85 | 1.61E-06 | MS.Trt_vs_MS.NoTrt_B |
| RPS11    | 1.27E-10 | -0.321  | 0.556 | 0.87 | 2.03E-06 | MS.Trt_vs_MS.NoTrt_B |
| HNRNPH1  | 1.45E-10 | 1.10158 | 0.989 | 1    | 2.31E-06 | MS.Trt_vs_MS.NoTrt_B |

|          |          |         |       |      |          |                      |
|----------|----------|---------|-------|------|----------|----------------------|
| CNN2     | 1.67E-10 | -0.5012 | 0.954 | 0.99 | 2.66E-06 | MS.Trt_vs_MS.NoTrt_B |
| RASGRP1  | 1.69E-10 | -0.6075 | 0.218 | 0.45 | 2.69E-06 | MS.Trt_vs_MS.NoTrt_B |
| TUBA1B   | 1.79E-10 | -0.5688 | 0.203 | 0.45 | 2.86E-06 | MS.Trt_vs_MS.NoTrt_B |
| EPS15    | 2.23E-10 | -0.3974 | 0.449 | 0.7  | 3.57E-06 | MS.Trt_vs_MS.NoTrt_B |
| RPS24    | 2.46E-10 | -0.3593 | 0.776 | 0.98 | 3.93E-06 | MS.Trt_vs_MS.NoTrt_B |
| P2RY8    | 3.11E-10 | -0.6018 | 0.368 | 0.64 | 4.97E-06 | MS.Trt_vs_MS.NoTrt_B |
| CALCOCO1 | 3.35E-10 | -0.368  | 0.338 | 0.63 | 5.34E-06 | MS.Trt_vs_MS.NoTrt_B |
| VCP      | 3.94E-10 | -0.5354 | 0.2   | 0.45 | 6.29E-06 | MS.Trt_vs_MS.NoTrt_B |
| ARHGAP30 | 4.67E-10 | -0.55   | 0.298 | 0.56 | 7.45E-06 | MS.Trt_vs_MS.NoTrt_B |
| TTL5     | 4.86E-10 | -0.6942 | 0.499 | 0.74 | 7.76E-06 | MS.Trt_vs_MS.NoTrt_B |
| GPI      | 5.58E-10 | -0.5181 | 0.795 | 0.92 | 8.92E-06 | MS.Trt_vs_MS.NoTrt_B |
| EDF1     | 5.80E-10 | -0.3296 | 0.288 | 0.58 | 9.26E-06 | MS.Trt_vs_MS.NoTrt_B |
| RELL2    | 6.10E-10 | -1.6892 | 0.026 | 0.16 | 9.74E-06 | MS.Trt_vs_MS.NoTrt_B |
| RHOH     | 6.45E-10 | -0.3573 | 0.721 | 0.89 | 1.03E-05 | MS.Trt_vs_MS.NoTrt_B |
| FGD3     | 6.90E-10 | -0.4055 | 0.414 | 0.68 | 1.10E-05 | MS.Trt_vs_MS.NoTrt_B |
| GBP2     | 7.03E-10 | -0.56   | 0.316 | 0.58 | 1.12E-05 | MS.Trt_vs_MS.NoTrt_B |
| ACTG1    | 7.10E-10 | -0.4061 | 0.802 | 0.96 | 1.13E-05 | MS.Trt_vs_MS.NoTrt_B |
| LDLRAP1  | 7.12E-10 | -0.6412 | 0.316 | 0.55 | 1.14E-05 | MS.Trt_vs_MS.NoTrt_B |
| RPL35A   | 7.37E-10 | -0.2594 | 0.747 | 0.97 | 1.18E-05 | MS.Trt_vs_MS.NoTrt_B |
| HMGNA4   | 7.44E-10 | -0.4796 | 0.176 | 0.41 | 1.19E-05 | MS.Trt_vs_MS.NoTrt_B |
| CHTF8    | 8.03E-10 | -0.7149 | 0.144 | 0.35 | 1.28E-05 | MS.Trt_vs_MS.NoTrt_B |
| AQP3     | 8.34E-10 | -0.9674 | 0.19  | 0.41 | 1.33E-05 | MS.Trt_vs_MS.NoTrt_B |
| TMEM63A  | 8.52E-10 | -0.4917 | 0.599 | 0.83 | 1.36E-05 | MS.Trt_vs_MS.NoTrt_B |
| PBXIP1   | 8.69E-10 | -0.5873 | 0.466 | 0.71 | 1.39E-05 | MS.Trt_vs_MS.NoTrt_B |
| COX7C    | 8.83E-10 | -0.3303 | 0.288 | 0.56 | 1.41E-05 | MS.Trt_vs_MS.NoTrt_B |
| PPP2R1A  | 9.01E-10 | -0.2771 | 0.547 | 0.77 | 1.44E-05 | MS.Trt_vs_MS.NoTrt_B |
| JAKMIP1  | 9.31E-10 | -0.6981 | 0.163 | 0.38 | 1.49E-05 | MS.Trt_vs_MS.NoTrt_B |
| GGA2     | 9.72E-10 | -0.4619 | 0.479 | 0.75 | 1.55E-05 | MS.Trt_vs_MS.NoTrt_B |
| IL2RA    | 1.00E-09 | -0.7032 | 0.268 | 0.51 | 1.60E-05 | MS.Trt_vs_MS.NoTrt_B |
| ANK3     | 1.00E-09 | 0.85485 | 0.926 | 0.82 | 1.60E-05 | MS.Trt_vs_MS.NoTrt_B |
| ANXA5    | 1.03E-09 | -0.764  | 0.192 | 0.42 | 1.65E-05 | MS.Trt_vs_MS.NoTrt_B |
| ITGB1    | 1.10E-09 | -0.408  | 0.523 | 0.76 | 1.76E-05 | MS.Trt_vs_MS.NoTrt_B |
| TALDO1   | 1.10E-09 | -0.7461 | 0.538 | 0.78 | 1.76E-05 | MS.Trt_vs_MS.NoTrt_B |
| PRKCQ    | 1.12E-09 | -0.3362 | 0.259 | 0.52 | 1.79E-05 | MS.Trt_vs_MS.NoTrt_B |
| ATP5B    | 1.14E-09 | -0.6441 | 0.251 | 0.5  | 1.82E-05 | MS.Trt_vs_MS.NoTrt_B |
| MT-ND4   | 1.15E-09 | 0.75919 | 0.989 | 1    | 1.84E-05 | MS.Trt_vs_MS.NoTrt_B |
| RBM4     | 1.23E-09 | -0.2539 | 0.551 | 0.8  | 1.96E-05 | MS.Trt_vs_MS.NoTrt_B |
| DEF6     | 1.30E-09 | -0.368  | 0.331 | 0.6  | 2.07E-05 | MS.Trt_vs_MS.NoTrt_B |
| ZNF362   | 1.38E-09 | -1.6086 | 0.048 | 0.2  | 2.20E-05 | MS.Trt_vs_MS.NoTrt_B |
| RPS6KA1  | 1.43E-09 | -0.9985 | 0.122 | 0.32 | 2.28E-05 | MS.Trt_vs_MS.NoTrt_B |

|          |          |         |       |      |          |                      |
|----------|----------|---------|-------|------|----------|----------------------|
| ZAP70    | 1.50E-09 | -0.5435 | 0.359 | 0.62 | 2.39E-05 | MS.Trt_vs_MS.NoTrt_B |
| LDLRAD4  | 1.60E-09 | -0.4628 | 0.218 | 0.45 | 2.55E-05 | MS.Trt_vs_MS.NoTrt_B |
| FAM118A  | 1.72E-09 | -1.2386 | 0.447 | 0.68 | 2.75E-05 | MS.Trt_vs_MS.NoTrt_B |
| TMEM181  | 1.77E-09 | -0.632  | 0.29  | 0.55 | 2.82E-05 | MS.Trt_vs_MS.NoTrt_B |
| RARRES3  | 1.78E-09 | -0.4642 | 0.214 | 0.46 | 2.85E-05 | MS.Trt_vs_MS.NoTrt_B |
| LITAF    | 1.79E-09 | -0.5347 | 0.41  | 0.65 | 2.87E-05 | MS.Trt_vs_MS.NoTrt_B |
| CHCHD2   | 1.92E-09 | -0.3186 | 0.292 | 0.55 | 3.06E-05 | MS.Trt_vs_MS.NoTrt_B |
| HLA-DQB1 | 1.98E-09 | -1.0829 | 0.394 | 0.65 | 3.17E-05 | MS.Trt_vs_MS.NoTrt_B |
| NCOA4    | 2.06E-09 | -0.8032 | 0.131 | 0.34 | 3.29E-05 | MS.Trt_vs_MS.NoTrt_B |
| REEP5    | 2.25E-09 | -0.2962 | 0.214 | 0.45 | 3.59E-05 | MS.Trt_vs_MS.NoTrt_B |
| MBP      | 2.31E-09 | -0.5014 | 0.275 | 0.51 | 3.70E-05 | MS.Trt_vs_MS.NoTrt_B |
| TADA3    | 2.62E-09 | -0.3589 | 0.442 | 0.71 | 4.18E-05 | MS.Trt_vs_MS.NoTrt_B |
| SEPW1    | 3.22E-09 | -0.2904 | 0.834 | 0.96 | 5.14E-05 | MS.Trt_vs_MS.NoTrt_B |
| GLRX     | 3.25E-09 | -0.5039 | 0.58  | 0.78 | 5.20E-05 | MS.Trt_vs_MS.NoTrt_B |
| RALY     | 3.40E-09 | -0.4434 | 0.259 | 0.51 | 5.42E-05 | MS.Trt_vs_MS.NoTrt_B |
| LGALS3   | 3.68E-09 | -0.6202 | 0.466 | 0.67 | 5.87E-05 | MS.Trt_vs_MS.NoTrt_B |
| UFD1L    | 3.95E-09 | -0.5585 | 0.66  | 0.83 | 6.31E-05 | MS.Trt_vs_MS.NoTrt_B |
| ERCC1    | 4.10E-09 | -0.3086 | 0.621 | 0.88 | 6.54E-05 | MS.Trt_vs_MS.NoTrt_B |
| UBE2F    | 4.14E-09 | -0.2854 | 0.492 | 0.76 | 6.61E-05 | MS.Trt_vs_MS.NoTrt_B |
| ATP5F1   | 4.31E-09 | -0.2533 | 0.359 | 0.59 | 6.89E-05 | MS.Trt_vs_MS.NoTrt_B |
| TSC22D3  | 4.47E-09 | -0.3978 | 0.475 | 0.75 | 7.14E-05 | MS.Trt_vs_MS.NoTrt_B |
| DBI      | 5.01E-09 | -0.6025 | 0.131 | 0.33 | 8.01E-05 | MS.Trt_vs_MS.NoTrt_B |
| RPL4     | 5.14E-09 | -0.3645 | 0.837 | 0.98 | 8.21E-05 | MS.Trt_vs_MS.NoTrt_B |
| SRP14    | 5.32E-09 | -0.2756 | 0.42  | 0.72 | 8.50E-05 | MS.Trt_vs_MS.NoTrt_B |
| HLA-A    | 5.35E-09 | -0.4314 | 0.747 | 0.94 | 8.55E-05 | MS.Trt_vs_MS.NoTrt_B |
| TRPC3    | 5.72E-09 | 0.4049  | 0.42  | 0.18 | 9.13E-05 | MS.Trt_vs_MS.NoTrt_B |
| IRF9     | 6.30E-09 | -0.427  | 0.756 | 0.94 | 1.01E-04 | MS.Trt_vs_MS.NoTrt_B |
| FLT3LG   | 7.07E-09 | -0.3836 | 0.702 | 0.83 | 1.13E-04 | MS.Trt_vs_MS.NoTrt_B |
| PEBP1    | 7.28E-09 | -0.4295 | 0.279 | 0.52 | 1.16E-04 | MS.Trt_vs_MS.NoTrt_B |
| MGAT1    | 7.30E-09 | -0.5059 | 0.392 | 0.63 | 1.17E-04 | MS.Trt_vs_MS.NoTrt_B |
| MRI1     | 7.33E-09 | -0.4848 | 0.573 | 0.83 | 1.17E-04 | MS.Trt_vs_MS.NoTrt_B |
| ACLY     | 7.72E-09 | -0.7475 | 0.109 | 0.3  | 1.23E-04 | MS.Trt_vs_MS.NoTrt_B |
| ATG7     | 8.16E-09 | -0.6106 | 0.359 | 0.66 | 1.30E-04 | MS.Trt_vs_MS.NoTrt_B |
| MYH9     | 8.18E-09 | -0.2759 | 0.656 | 0.89 | 1.31E-04 | MS.Trt_vs_MS.NoTrt_B |
| PCSK1N   | 8.20E-09 | -0.4319 | 0.2   | 0.41 | 1.31E-04 | MS.Trt_vs_MS.NoTrt_B |
| CEP63    | 8.29E-09 | -0.2676 | 0.473 | 0.76 | 0.000132 | MS.Trt_vs_MS.NoTrt_B |
| CKLF     | 8.48E-09 | -0.3264 | 0.144 | 0.34 | 1.35E-04 | MS.Trt_vs_MS.NoTrt_B |
| LCP1     | 8.69E-09 | -0.2994 | 0.51  | 0.81 | 1.39E-04 | MS.Trt_vs_MS.NoTrt_B |
| DIP2B    | 9.05E-09 | -0.4311 | 0.305 | 0.54 | 1.45E-04 | MS.Trt_vs_MS.NoTrt_B |
| SMIM10L1 | 9.11E-09 | -1.2153 | 0.102 | 0.28 | 1.45E-04 | MS.Trt_vs_MS.NoTrt_B |

|          |          |         |       |      |          |                      |
|----------|----------|---------|-------|------|----------|----------------------|
| HNRNPA1  | 9.43E-09 | -0.3017 | 0.671 | 0.93 | 1.51E-04 | MS.Trt_vs_MS.NoTrt_B |
| LRRC75A  | 9.78E-09 | -0.3235 | 0.394 | 0.68 | 1.56E-04 | MS.Trt_vs_MS.NoTrt_B |
| ACTN4    | 9.84E-09 | -0.6462 | 0.231 | 0.46 | 1.57E-04 | MS.Trt_vs_MS.NoTrt_B |
| ARL17A   | 1.06E-08 | -0.5043 | 0.503 | 0.75 | 1.69E-04 | MS.Trt_vs_MS.NoTrt_B |
| VAMP5    | 1.13E-08 | -0.3633 | 0.096 | 0.28 | 1.81E-04 | MS.Trt_vs_MS.NoTrt_B |
| TMEM219  | 1.20E-08 | -0.5019 | 0.146 | 0.36 | 1.91E-04 | MS.Trt_vs_MS.NoTrt_B |
| NCKAP1L  | 1.21E-08 | -0.5269 | 0.601 | 0.8  | 1.93E-04 | MS.Trt_vs_MS.NoTrt_B |
| PPIA     | 1.33E-08 | -0.2801 | 0.754 | 0.94 | 2.12E-04 | MS.Trt_vs_MS.NoTrt_B |
| WDR1     | 1.46E-08 | -0.4126 | 0.277 | 0.53 | 2.33E-04 | MS.Trt_vs_MS.NoTrt_B |
| CSNK2A2  | 1.52E-08 | -1.0503 | 0.159 | 0.35 | 2.43E-04 | MS.Trt_vs_MS.NoTrt_B |
| CCM2     | 1.55E-08 | -0.5249 | 0.562 | 0.74 | 2.48E-04 | MS.Trt_vs_MS.NoTrt_B |
| BRK1     | 1.64E-08 | -0.3863 | 0.168 | 0.39 | 2.62E-04 | MS.Trt_vs_MS.NoTrt_B |
| CPQ      | 1.64E-08 | -0.5681 | 0.24  | 0.47 | 2.63E-04 | MS.Trt_vs_MS.NoTrt_B |
| LPP      | 1.67E-08 | -0.4159 | 0.867 | 0.95 | 2.67E-04 | MS.Trt_vs_MS.NoTrt_B |
| TNFRSF25 | 1.68E-08 | -0.2967 | 0.545 | 0.76 | 2.68E-04 | MS.Trt_vs_MS.NoTrt_B |
| TAP1     | 1.71E-08 | -0.5056 | 0.514 | 0.74 | 2.73E-04 | MS.Trt_vs_MS.NoTrt_B |
| GLIPR2   | 1.89E-08 | -0.3636 | 0.174 | 0.38 | 3.02E-04 | MS.Trt_vs_MS.NoTrt_B |
| RAD17    | 1.91E-08 | -0.6572 | 0.357 | 0.59 | 3.06E-04 | MS.Trt_vs_MS.NoTrt_B |
| IK       | 2.07E-08 | -0.2682 | 0.68  | 0.87 | 3.31E-04 | MS.Trt_vs_MS.NoTrt_B |
| TRAPPC3  | 2.08E-08 | -0.5443 | 0.277 | 0.5  | 3.32E-04 | MS.Trt_vs_MS.NoTrt_B |
| CD6      | 2.17E-08 | -0.3246 | 0.514 | 0.77 | 3.46E-04 | MS.Trt_vs_MS.NoTrt_B |
| STX8     | 2.19E-08 | -0.31   | 0.712 | 0.91 | 3.50E-04 | MS.Trt_vs_MS.NoTrt_B |
| EIF3K    | 2.31E-08 | -0.2943 | 0.538 | 0.78 | 3.69E-04 | MS.Trt_vs_MS.NoTrt_B |
| TBC1D5   | 2.32E-08 | -0.5415 | 0.44  | 0.68 | 3.70E-04 | MS.Trt_vs_MS.NoTrt_B |
| APRT     | 2.39E-08 | -0.391  | 0.277 | 0.51 | 3.81E-04 | MS.Trt_vs_MS.NoTrt_B |
| SERINC3  | 2.41E-08 | -0.4184 | 0.536 | 0.74 | 3.85E-04 | MS.Trt_vs_MS.NoTrt_B |
| SNRPN    | 2.42E-08 | -0.2773 | 0.416 | 0.64 | 3.87E-04 | MS.Trt_vs_MS.NoTrt_B |
| CFDP1    | 2.44E-08 | -0.9415 | 0.516 | 0.71 | 3.90E-04 | MS.Trt_vs_MS.NoTrt_B |
| HSPA8    | 2.65E-08 | -0.2802 | 0.656 | 0.92 | 4.22E-04 | MS.Trt_vs_MS.NoTrt_B |
| GPR141   | 2.78E-08 | -0.2644 | 0.312 | 0.57 | 4.43E-04 | MS.Trt_vs_MS.NoTrt_B |
| LIMK2    | 2.84E-08 | -0.9598 | 0.111 | 0.29 | 4.54E-04 | MS.Trt_vs_MS.NoTrt_B |
| CCR4     | 2.90E-08 | -1.0251 | 0.786 | 0.91 | 4.63E-04 | MS.Trt_vs_MS.NoTrt_B |
| CDC25B   | 2.91E-08 | -0.2531 | 0.333 | 0.58 | 4.65E-04 | MS.Trt_vs_MS.NoTrt_B |
| EIF1AY   | 2.93E-08 | -1.2529 | 0.451 | 0.65 | 4.69E-04 | MS.Trt_vs_MS.NoTrt_B |
| COQ10B   | 3.02E-08 | 0.2637  | 0.451 | 0.7  | 4.82E-04 | MS.Trt_vs_MS.NoTrt_B |
| CAPZB    | 3.09E-08 | -0.3725 | 0.458 | 0.7  | 4.94E-04 | MS.Trt_vs_MS.NoTrt_B |
| EIF4A2   | 3.15E-08 | -0.3607 | 0.401 | 0.64 | 5.04E-04 | MS.Trt_vs_MS.NoTrt_B |
| DHFR2    | 3.31E-08 | -1.1647 | 0.423 | 0.63 | 5.29E-04 | MS.Trt_vs_MS.NoTrt_B |
| RABGAP1L | 3.33E-08 | -0.6569 | 0.78  | 0.91 | 5.33E-04 | MS.Trt_vs_MS.NoTrt_B |
| DNMT3A   | 3.49E-08 | 0.31858 | 0.364 | 0.63 | 5.58E-04 | MS.Trt_vs_MS.NoTrt_B |

|          |          |         |       |      |          |                      |
|----------|----------|---------|-------|------|----------|----------------------|
| PXN      | 3.50E-08 | -0.2858 | 0.283 | 0.51 | 5.59E-04 | MS.Trt_vs_MS.NoTrt_B |
| SLFN5    | 3.69E-08 | -0.2891 | 0.763 | 0.89 | 5.90E-04 | MS.Trt_vs_MS.NoTrt_B |
| GBP3     | 3.74E-08 | -1.2329 | 0.122 | 0.29 | 5.97E-04 | MS.Trt_vs_MS.NoTrt_B |
| POLD4    | 3.88E-08 | -0.2944 | 0.654 | 0.85 | 6.20E-04 | MS.Trt_vs_MS.NoTrt_B |
| PSMA3    | 4.01E-08 | -0.4109 | 0.595 | 0.82 | 6.40E-04 | MS.Trt_vs_MS.NoTrt_B |
| NGLY1    | 4.09E-08 | -0.4772 | 0.501 | 0.76 | 6.53E-04 | MS.Trt_vs_MS.NoTrt_B |
| DSCR3    | 4.15E-08 | -0.4739 | 0.503 | 0.71 | 6.63E-04 | MS.Trt_vs_MS.NoTrt_B |
| TMEM14B  | 4.53E-08 | -0.3458 | 0.725 | 0.9  | 7.23E-04 | MS.Trt_vs_MS.NoTrt_B |
| TMEM179B | 4.70E-08 | -0.599  | 0.118 | 0.3  | 7.51E-04 | MS.Trt_vs_MS.NoTrt_B |
| RPL17    | 4.90E-08 | -0.2662 | 0.756 | 1    | 7.83E-04 | MS.Trt_vs_MS.NoTrt_B |
| VTI1B    | 4.98E-08 | -0.5808 | 0.142 | 0.32 | 7.96E-04 | MS.Trt_vs_MS.NoTrt_B |
| SQSTM1   | 5.58E-08 | -0.4779 | 0.736 | 0.84 | 8.91E-04 | MS.Trt_vs_MS.NoTrt_B |
| ARPC1B   | 5.70E-08 | -0.2734 | 0.841 | 0.98 | 9.10E-04 | MS.Trt_vs_MS.NoTrt_B |
| PGK1     | 5.82E-08 | -0.3515 | 0.431 | 0.66 | 9.29E-04 | MS.Trt_vs_MS.NoTrt_B |
| FUBP1    | 6.00E-08 | -0.4386 | 0.27  | 0.49 | 9.58E-04 | MS.Trt_vs_MS.NoTrt_B |
| C11orf31 | 6.06E-08 | -0.4224 | 0.397 | 0.6  | 9.68E-04 | MS.Trt_vs_MS.NoTrt_B |
| ATP2C1   | 6.30E-08 | -0.3941 | 0.085 | 0.24 | 0.001006 | MS.Trt_vs_MS.NoTrt_B |
| SMIM5    | 6.34E-08 | -0.3937 | 0.185 | 0.39 | 0.001013 | MS.Trt_vs_MS.NoTrt_B |
| ADI1     | 6.37E-08 | 0.28825 | 0.651 | 0.87 | 0.001017 | MS.Trt_vs_MS.NoTrt_B |
| HLA-F    | 6.68E-08 | -0.2631 | 0.451 | 0.65 | 0.001067 | MS.Trt_vs_MS.NoTrt_B |
| NDUFS1   | 7.04E-08 | -0.4632 | 0.832 | 0.98 | 0.001124 | MS.Trt_vs_MS.NoTrt_B |
| DDX58    | 7.24E-08 | -0.3197 | 0.203 | 0.4  | 0.001157 | MS.Trt_vs_MS.NoTrt_B |
| SCAP     | 7.30E-08 | -0.3496 | 0.427 | 0.68 | 0.001166 | MS.Trt_vs_MS.NoTrt_B |
| PYM1     | 7.33E-08 | -0.4458 | 0.203 | 0.41 | 0.00117  | MS.Trt_vs_MS.NoTrt_B |
| EIF3G    | 7.65E-08 | -0.3932 | 0.743 | 0.89 | 0.001222 | MS.Trt_vs_MS.NoTrt_B |
| TLK1     | 7.83E-08 | 0.32078 | 0.632 | 0.85 | 0.00125  | MS.Trt_vs_MS.NoTrt_B |
| CYTH2    | 7.93E-08 | -0.2853 | 0.475 | 0.75 | 0.001267 | MS.Trt_vs_MS.NoTrt_B |
| MAPK6    | 8.42E-08 | -0.2591 | 0.305 | 0.54 | 0.001345 | MS.Trt_vs_MS.NoTrt_B |
| DDB2     | 8.61E-08 | -0.3844 | 0.771 | 0.9  | 0.001375 | MS.Trt_vs_MS.NoTrt_B |
| C12orf75 | 8.86E-08 | -0.6042 | 0.092 | 0.25 | 0.001415 | MS.Trt_vs_MS.NoTrt_B |
| SPOCK2   | 9.11E-08 | -0.446  | 0.514 | 0.71 | 0.001456 | MS.Trt_vs_MS.NoTrt_B |
| EIF3C    | 9.16E-08 | -0.2645 | 0.641 | 0.85 | 0.001464 | MS.Trt_vs_MS.NoTrt_B |
| RPL12    | 9.25E-08 | -0.2625 | 0.715 | 0.95 | 0.001478 | MS.Trt_vs_MS.NoTrt_B |
| ATP5O    | 9.53E-08 | -0.362  | 0.283 | 0.52 | 0.001522 | MS.Trt_vs_MS.NoTrt_B |
| DDX24    | 9.61E-08 | -0.2839 | 0.405 | 0.64 | 0.001534 | MS.Trt_vs_MS.NoTrt_B |
| ATP5A1   | 9.73E-08 | -0.3241 | 0.976 | 1    | 0.001553 | MS.Trt_vs_MS.NoTrt_B |
| SHMT2    | 9.74E-08 | -0.557  | 0.198 | 0.41 | 0.001556 | MS.Trt_vs_MS.NoTrt_B |
| CIRBP    | 1.08E-07 | -0.257  | 0.477 | 0.78 | 0.001724 | MS.Trt_vs_MS.NoTrt_B |
| ZC3HC1   | 1.13E-07 | -0.2638 | 0.272 | 0.5  | 0.001807 | MS.Trt_vs_MS.NoTrt_B |
| PPM1M    | 1.13E-07 | -0.5409 | 0.094 | 0.25 | 0.001811 | MS.Trt_vs_MS.NoTrt_B |

|          |          |         |       |      |          |                      |
|----------|----------|---------|-------|------|----------|----------------------|
| ARFGAP3  | 1.17E-07 | -0.5099 | 0.211 | 0.42 | 0.001876 | MS.Trt_vs_MS.NoTrt_B |
| RNF114   | 1.22E-07 | -0.4535 | 0.593 | 0.83 | 0.001954 | MS.Trt_vs_MS.NoTrt_B |
| CBWD2    | 1.23E-07 | -0.6947 | 0.331 | 0.54 | 0.001971 | MS.Trt_vs_MS.NoTrt_B |
| NDEL1    | 1.26E-07 | -0.3324 | 0.444 | 0.66 | 0.002012 | MS.Trt_vs_MS.NoTrt_B |
| FDFT1    | 1.29E-07 | -0.5096 | 0.224 | 0.42 | 0.002053 | MS.Trt_vs_MS.NoTrt_B |
| UXS1     | 1.29E-07 | -0.3296 | 0.172 | 0.37 | 0.002056 | MS.Trt_vs_MS.NoTrt_B |
| GLB1     | 1.31E-07 | -0.619  | 0.153 | 0.34 | 0.002098 | MS.Trt_vs_MS.NoTrt_B |
| PIM2     | 1.32E-07 | -0.4401 | 0.728 | 0.85 | 0.002106 | MS.Trt_vs_MS.NoTrt_B |
| FBXO7    | 1.41E-07 | -0.3169 | 0.233 | 0.44 | 0.00225  | MS.Trt_vs_MS.NoTrt_B |
| HINT2    | 1.51E-07 | -0.8318 | 0.041 | 0.16 | 0.002404 | MS.Trt_vs_MS.NoTrt_B |
| XPR1     | 1.53E-07 | -0.6756 | 0.211 | 0.41 | 0.002441 | MS.Trt_vs_MS.NoTrt_B |
| RPL29    | 1.63E-07 | -0.2645 | 0.695 | 0.98 | 0.002597 | MS.Trt_vs_MS.NoTrt_B |
| WWC3     | 1.64E-07 | 1.16987 | 0.227 | 0.44 | 0.002618 | MS.Trt_vs_MS.NoTrt_B |
| PAX6     | 1.68E-07 | -0.5336 | 0.24  | 0.44 | 0.002679 | MS.Trt_vs_MS.NoTrt_B |
| UCP2     | 1.68E-07 | -0.4005 | 0.669 | 0.86 | 0.002681 | MS.Trt_vs_MS.NoTrt_B |
| FAM161A  | 1.73E-07 | -0.9156 | 0.508 | 0.76 | 0.002761 | MS.Trt_vs_MS.NoTrt_B |
| ADGRE5   | 1.77E-07 | -0.3156 | 0.458 | 0.69 | 0.002824 | MS.Trt_vs_MS.NoTrt_B |
| FKBP8    | 1.77E-07 | -0.5798 | 0.129 | 0.31 | 0.002825 | MS.Trt_vs_MS.NoTrt_B |
| KARS     | 1.77E-07 | -0.4313 | 0.196 | 0.39 | 0.002829 | MS.Trt_vs_MS.NoTrt_B |
| PLA2G7   | 1.80E-07 | -0.439  | 0.414 | 0.62 | 0.002868 | MS.Trt_vs_MS.NoTrt_B |
| ANAPC5   | 1.82E-07 | -0.3551 | 0.885 | 0.98 | 0.00291  | MS.Trt_vs_MS.NoTrt_B |
| CHMP7    | 1.91E-07 | -0.4117 | 0.449 | 0.67 | 0.003058 | MS.Trt_vs_MS.NoTrt_B |
| CSNK2B   | 1.92E-07 | -0.5475 | 0.545 | 0.74 | 0.003073 | MS.Trt_vs_MS.NoTrt_B |
| SCRN3    | 1.93E-07 | -0.7521 | 0.294 | 0.51 | 0.003076 | MS.Trt_vs_MS.NoTrt_B |
| ADAT1    | 1.96E-07 | -1.0545 | 0.525 | 0.74 | 0.003131 | MS.Trt_vs_MS.NoTrt_B |
| SDHA     | 1.98E-07 | -0.472  | 0.501 | 0.7  | 0.00316  | MS.Trt_vs_MS.NoTrt_B |
| PERP     | 1.98E-07 | -2.183  | 0.022 | 0.12 | 0.003164 | MS.Trt_vs_MS.NoTrt_B |
| ZC3H7A   | 1.99E-07 | -0.43   | 0.259 | 0.47 | 0.003172 | MS.Trt_vs_MS.NoTrt_B |
| URM1     | 2.06E-07 | -1.0405 | 0.081 | 0.23 | 0.00329  | MS.Trt_vs_MS.NoTrt_B |
| ARHGAP4  | 2.12E-07 | -0.302  | 0.37  | 0.58 | 0.003393 | MS.Trt_vs_MS.NoTrt_B |
| HBP1     | 2.29E-07 | -0.3422 | 0.669 | 0.86 | 0.003658 | MS.Trt_vs_MS.NoTrt_B |
| LSM7     | 2.31E-07 | 0.67578 | 0.486 | 0.74 | 0.003693 | MS.Trt_vs_MS.NoTrt_B |
| APOL6    | 2.37E-07 | -0.6695 | 0.725 | 0.88 | 0.003787 | MS.Trt_vs_MS.NoTrt_B |
| ALDH8A1  | 2.38E-07 | -0.3553 | 0.401 | 0.67 | 0.003806 | MS.Trt_vs_MS.NoTrt_B |
| PSMA6    | 2.41E-07 | -0.3523 | 0.782 | 0.92 | 0.00385  | MS.Trt_vs_MS.NoTrt_B |
| TMEM199  | 2.48E-07 | -1.2226 | 0.444 | 0.67 | 0.003969 | MS.Trt_vs_MS.NoTrt_B |
| MYO1G    | 2.55E-07 | -0.4159 | 0.455 | 0.68 | 0.004073 | MS.Trt_vs_MS.NoTrt_B |
| EZR      | 2.62E-07 | -0.3977 | 0.562 | 0.74 | 0.004179 | MS.Trt_vs_MS.NoTrt_B |
| UHRF1BP1 | 2.66E-07 | -1.4044 | 0.425 | 0.65 | 0.004247 | MS.Trt_vs_MS.NoTrt_B |
| LDHA     | 2.67E-07 | -0.5396 | 0.582 | 0.76 | 0.004273 | MS.Trt_vs_MS.NoTrt_B |

|            |          |         |       |      |          |                      |
|------------|----------|---------|-------|------|----------|----------------------|
| FAS        | 2.72E-07 | -0.477  | 0.244 | 0.44 | 0.004344 | MS.Trt_vs_MS.NoTrt_B |
| MAP3K1     | 2.72E-07 | 0.28228 | 0.386 | 0.64 | 0.004351 | MS.Trt_vs_MS.NoTrt_B |
| RP11-529K1 | 2.74E-07 | -0.4362 | 0.039 | 0.16 | 0.004373 | MS.Trt_vs_MS.NoTrt_B |
| IL2RB      | 2.91E-07 | -0.3107 | 0.364 | 0.6  | 0.004643 | MS.Trt_vs_MS.NoTrt_B |
| TMBIM1     | 2.96E-07 | -0.8063 | 0.44  | 0.64 | 0.004729 | MS.Trt_vs_MS.NoTrt_B |
| C14orf159  | 2.98E-07 | -0.815  | 0.525 | 0.73 | 0.004768 | MS.Trt_vs_MS.NoTrt_B |
| SS18       | 2.99E-07 | -0.4234 | 0.429 | 0.65 | 0.004771 | MS.Trt_vs_MS.NoTrt_B |
| ARHGAP25   | 2.99E-07 | -0.4901 | 0.383 | 0.59 | 0.004779 | MS.Trt_vs_MS.NoTrt_B |
| SHMT1      | 3.05E-07 | -0.5326 | 0.272 | 0.48 | 0.004867 | MS.Trt_vs_MS.NoTrt_B |
| GSDMD      | 3.09E-07 | -0.6436 | 0.621 | 0.82 | 0.004937 | MS.Trt_vs_MS.NoTrt_B |
| GRB2       | 3.10E-07 | -0.4769 | 0.534 | 0.74 | 0.004957 | MS.Trt_vs_MS.NoTrt_B |
| TXLNA      | 3.12E-07 | -0.3337 | 0.2   | 0.4  | 0.004985 | MS.Trt_vs_MS.NoTrt_B |
| COX7A2     | 3.17E-07 | 0.28062 | 0.627 | 0.82 | 0.005065 | MS.Trt_vs_MS.NoTrt_B |
| TMEM173    | 3.22E-07 | -0.4824 | 0.192 | 0.38 | 0.00514  | MS.Trt_vs_MS.NoTrt_B |
| TSTA3      | 3.22E-07 | -0.4098 | 0.096 | 0.25 | 0.005146 | MS.Trt_vs_MS.NoTrt_B |
| SRBD1      | 3.29E-07 | 0.26105 | 0.218 | 0.42 | 0.005259 | MS.Trt_vs_MS.NoTrt_B |
| MICU2      | 3.31E-07 | -0.9419 | 0.34  | 0.54 | 0.005281 | MS.Trt_vs_MS.NoTrt_B |
| CEP95      | 3.45E-07 | 0.33391 | 0.292 | 0.52 | 0.005519 | MS.Trt_vs_MS.NoTrt_B |
| TNFRSF1B   | 3.48E-07 | -0.3042 | 0.603 | 0.76 | 0.005553 | MS.Trt_vs_MS.NoTrt_B |
| EIF4H      | 3.56E-07 | -0.334  | 0.322 | 0.55 | 0.005689 | MS.Trt_vs_MS.NoTrt_B |
| DYNLL1     | 3.61E-07 | -0.3952 | 0.216 | 0.41 | 0.005762 | MS.Trt_vs_MS.NoTrt_B |
| NRF1       | 3.79E-07 | -0.9001 | 0.203 | 0.38 | 0.006055 | MS.Trt_vs_MS.NoTrt_B |
| C10orf54   | 3.84E-07 | -0.5159 | 0.281 | 0.49 | 0.006128 | MS.Trt_vs_MS.NoTrt_B |
| SEC11A     | 3.91E-07 | -0.4019 | 0.641 | 0.82 | 0.006253 | MS.Trt_vs_MS.NoTrt_B |
| GPR63      | 3.93E-07 | -0.2573 | 0.229 | 0.43 | 0.006283 | MS.Trt_vs_MS.NoTrt_B |
| B3GALNT1   | 4.03E-07 | -0.2793 | 0.15  | 0.32 | 0.00644  | MS.Trt_vs_MS.NoTrt_B |
| TAZ        | 4.22E-07 | -0.4339 | 0.379 | 0.62 | 0.006738 | MS.Trt_vs_MS.NoTrt_B |
| DYNLRB1    | 4.29E-07 | -0.5329 | 0.122 | 0.29 | 0.006854 | MS.Trt_vs_MS.NoTrt_B |
| RHOG       | 4.43E-07 | -0.2889 | 0.24  | 0.46 | 0.007078 | MS.Trt_vs_MS.NoTrt_B |
| SLA2       | 4.46E-07 | -1.3419 | 0.377 | 0.58 | 0.007119 | MS.Trt_vs_MS.NoTrt_B |
| CCZ1B      | 4.49E-07 | -0.4984 | 0.527 | 0.75 | 0.007168 | MS.Trt_vs_MS.NoTrt_B |
| C1orf56    | 4.49E-07 | 1.02698 | 0.911 | 0.89 | 0.007172 | MS.Trt_vs_MS.NoTrt_B |
| EIF3I      | 4.51E-07 | -0.8236 | 0.373 | 0.56 | 0.007205 | MS.Trt_vs_MS.NoTrt_B |
| ADK        | 4.53E-07 | -0.2651 | 0.17  | 0.35 | 0.007231 | MS.Trt_vs_MS.NoTrt_B |
| TNFRSF14   | 4.54E-07 | -0.3564 | 0.222 | 0.43 | 0.007253 | MS.Trt_vs_MS.NoTrt_B |
| DDX46      | 4.57E-07 | -0.9125 | 0.386 | 0.55 | 0.007295 | MS.Trt_vs_MS.NoTrt_B |
| FECH       | 4.57E-07 | -0.7715 | 0.508 | 0.74 | 0.007298 | MS.Trt_vs_MS.NoTrt_B |
| NDUFB4     | 4.59E-07 | -0.2863 | 0.179 | 0.36 | 0.007333 | MS.Trt_vs_MS.NoTrt_B |
| HAPLN3     | 4.59E-07 | -0.3336 | 0.111 | 0.27 | 0.007339 | MS.Trt_vs_MS.NoTrt_B |
| ZNF200     | 4.62E-07 | -0.4608 | 0.63  | 0.83 | 0.007376 | MS.Trt_vs_MS.NoTrt_B |

|            |          |         |       |      |          |                      |
|------------|----------|---------|-------|------|----------|----------------------|
| RPS20      | 4.92E-07 | -0.2622 | 0.756 | 0.92 | 0.007863 | MS.Trt_vs_MS.NoTrt_B |
| XAB2       | 4.98E-07 | -0.2798 | 0.144 | 0.32 | 0.007956 | MS.Trt_vs_MS.NoTrt_B |
| EXOC4      | 5.04E-07 | -0.4427 | 0.464 | 0.67 | 0.00805  | MS.Trt_vs_MS.NoTrt_B |
| RNF214     | 5.09E-07 | -0.337  | 0.146 | 0.32 | 0.008123 | MS.Trt_vs_MS.NoTrt_B |
| CLCN7      | 5.42E-07 | 0.28001 | 0.183 | 0.4  | 0.008654 | MS.Trt_vs_MS.NoTrt_B |
| TTC7A      | 5.45E-07 | -0.7305 | 0.133 | 0.3  | 0.008706 | MS.Trt_vs_MS.NoTrt_B |
| ACBD6      | 5.46E-07 | -0.2999 | 0.336 | 0.55 | 0.00872  | MS.Trt_vs_MS.NoTrt_B |
| CLINT1     | 5.48E-07 | 0.37758 | 0.532 | 0.78 | 0.008752 | MS.Trt_vs_MS.NoTrt_B |
| UBA1       | 5.52E-07 | -0.4079 | 0.612 | 0.8  | 0.008824 | MS.Trt_vs_MS.NoTrt_B |
| TRMT44     | 5.78E-07 | -0.6016 | 0.12  | 0.28 | 0.009226 | MS.Trt_vs_MS.NoTrt_B |
| RPL3       | 5.87E-07 | 0.45073 | 1     | 1    | 0.00937  | MS.Trt_vs_MS.NoTrt_B |
| APBA3      | 6.07E-07 | -0.3635 | 0.562 | 0.75 | 0.009699 | MS.Trt_vs_MS.NoTrt_B |
| CD58       | 6.11E-07 | -0.2885 | 0.109 | 0.27 | 0.009758 | MS.Trt_vs_MS.NoTrt_B |
| ERGIC2     | 6.26E-07 | 0.77001 | 0.349 | 0.58 | 0.010002 | MS.Trt_vs_MS.NoTrt_B |
| DGCR2      | 6.37E-07 | -0.3781 | 0.157 | 0.34 | 0.010177 | MS.Trt_vs_MS.NoTrt_B |
| CCDC167    | 6.38E-07 | -0.7114 | 0.1   | 0.25 | 0.010183 | MS.Trt_vs_MS.NoTrt_B |
| EIF3CL     | 6.38E-07 | -0.5077 | 0.142 | 0.31 | 0.010187 | MS.Trt_vs_MS.NoTrt_B |
| TNIK       | 6.46E-07 | -0.9054 | 0.257 | 0.46 | 0.010322 | MS.Trt_vs_MS.NoTrt_B |
| AP000304.1 | 6.48E-07 | -0.6035 | 0.144 | 0.31 | 0.010353 | MS.Trt_vs_MS.NoTrt_B |
| BEX3       | 6.53E-07 | -0.4052 | 0.074 | 0.21 | 0.010431 | MS.Trt_vs_MS.NoTrt_B |
| ERAP2      | 6.53E-07 | -0.6629 | 0.595 | 0.72 | 0.010434 | MS.Trt_vs_MS.NoTrt_B |
| APH1A      | 6.84E-07 | -0.8078 | 0.122 | 0.28 | 0.010928 | MS.Trt_vs_MS.NoTrt_B |
| FAM134B    | 7.09E-07 | -0.6746 | 0.035 | 0.14 | 0.011329 | MS.Trt_vs_MS.NoTrt_B |
| CTSB       | 7.27E-07 | -0.4583 | 0.858 | 0.97 | 0.011608 | MS.Trt_vs_MS.NoTrt_B |
| PRELID3B   | 7.35E-07 | 0.36303 | 0.166 | 0.35 | 0.011738 | MS.Trt_vs_MS.NoTrt_B |
| LETMD1     | 7.42E-07 | -0.4999 | 0.669 | 0.89 | 0.011847 | MS.Trt_vs_MS.NoTrt_B |
| ABHD15     | 7.59E-07 | -0.7987 | 0.179 | 0.37 | 0.012121 | MS.Trt_vs_MS.NoTrt_B |
| R3HDM4     | 7.71E-07 | -0.4833 | 0.364 | 0.58 | 0.012323 | MS.Trt_vs_MS.NoTrt_B |
| HIF1AN     | 8.12E-07 | -0.3932 | 0.66  | 0.88 | 0.012966 | MS.Trt_vs_MS.NoTrt_B |
| UQCRB      | 8.24E-07 | 0.57885 | 0.58  | 0.8  | 0.013165 | MS.Trt_vs_MS.NoTrt_B |
| LRRC37A3   | 8.24E-07 | -0.4974 | 0.359 | 0.56 | 0.013168 | MS.Trt_vs_MS.NoTrt_B |
| IRF2       | 8.28E-07 | -0.359  | 0.24  | 0.43 | 0.013223 | MS.Trt_vs_MS.NoTrt_B |
| HNRNPF     | 8.57E-07 | -0.3449 | 0.309 | 0.52 | 0.013688 | MS.Trt_vs_MS.NoTrt_B |
| CRLF3      | 8.62E-07 | -0.4826 | 0.78  | 0.93 | 0.013776 | MS.Trt_vs_MS.NoTrt_B |
| EFTUD2     | 8.64E-07 | -0.6877 | 0.702 | 0.86 | 0.013795 | MS.Trt_vs_MS.NoTrt_B |
| ZFP36      | 8.76E-07 | -0.3573 | 0.237 | 0.45 | 0.014    | MS.Trt_vs_MS.NoTrt_B |
| NDUFS2     | 8.97E-07 | -0.4739 | 0.312 | 0.5  | 0.014332 | MS.Trt_vs_MS.NoTrt_B |
| RALGDS     | 9.26E-07 | -0.3108 | 0.255 | 0.47 | 0.014793 | MS.Trt_vs_MS.NoTrt_B |
| PARP4      | 9.26E-07 | -0.4465 | 0.19  | 0.37 | 0.014795 | MS.Trt_vs_MS.NoTrt_B |
| BUB3       | 9.43E-07 | 0.29222 | 0.495 | 0.76 | 0.015067 | MS.Trt_vs_MS.NoTrt_B |



|           |          |         |       |      |          |                      |
|-----------|----------|---------|-------|------|----------|----------------------|
| NR2C1     | 9.51E-07 | -0.4529 | 0.475 | 0.74 | 0.015191 | MS.Trt_vs_MS.NoTrt_B |
| TRABD     | 9.60E-07 | -0.5019 | 0.266 | 0.46 | 0.015328 | MS.Trt_vs_MS.NoTrt_B |
| SYT5      | 9.81E-07 | -0.4798 | 0.542 | 0.7  | 0.015665 | MS.Trt_vs_MS.NoTrt_B |
| COG5      | 9.83E-07 | 0.61248 | 0.137 | 0.3  | 0.015709 | MS.Trt_vs_MS.NoTrt_B |
| MAP4      | 9.84E-07 | -0.6137 | 0.66  | 0.81 | 0.015712 | MS.Trt_vs_MS.NoTrt_B |
| SLC3A2    | 9.97E-07 | -0.3968 | 0.375 | 0.56 | 0.015926 | MS.Trt_vs_MS.NoTrt_B |
| PSMG3     | 1.01E-06 | 0.32665 | 0.447 | 0.69 | 0.016196 | MS.Trt_vs_MS.NoTrt_B |
| SEC61G    | 1.02E-06 | -0.3416 | 0.198 | 0.37 | 0.016279 | MS.Trt_vs_MS.NoTrt_B |
| DPEP2     | 1.02E-06 | -0.3945 | 0.157 | 0.32 | 0.016364 | MS.Trt_vs_MS.NoTrt_B |
| MCM9      | 1.04E-06 | 0.42336 | 0.227 | 0.43 | 0.016671 | MS.Trt_vs_MS.NoTrt_B |
| KIAA0319L | 1.05E-06 | -0.6635 | 0.534 | 0.71 | 0.016736 | MS.Trt_vs_MS.NoTrt_B |
| RAP1GAP2  | 1.09E-06 | -0.7205 | 0.137 | 0.3  | 0.017388 | MS.Trt_vs_MS.NoTrt_B |
| RASA3     | 1.11E-06 | -0.3655 | 0.37  | 0.6  | 0.017666 | MS.Trt_vs_MS.NoTrt_B |
| LMF2      | 1.11E-06 | -0.3684 | 0.133 | 0.29 | 0.017747 | MS.Trt_vs_MS.NoTrt_B |
| SH2B1     | 1.12E-06 | -0.2855 | 0.458 | 0.68 | 0.017823 | MS.Trt_vs_MS.NoTrt_B |
| PMF1      | 1.12E-06 | -0.5204 | 0.325 | 0.51 | 0.017872 | MS.Trt_vs_MS.NoTrt_B |
| SUPV3L1   | 1.13E-06 | -0.3569 | 0.488 | 0.72 | 0.018123 | MS.Trt_vs_MS.NoTrt_B |
| SP140     | 1.14E-06 | -0.5603 | 0.133 | 0.3  | 0.018248 | MS.Trt_vs_MS.NoTrt_B |
| IL17RA    | 1.17E-06 | -0.5117 | 0.503 | 0.7  | 0.018707 | MS.Trt_vs_MS.NoTrt_B |
| EPB41     | 1.19E-06 | 0.47819 | 0.325 | 0.59 | 0.019009 | MS.Trt_vs_MS.NoTrt_B |
| PAN3      | 1.19E-06 | 0.91011 | 0.767 | 0.94 | 0.019042 | MS.Trt_vs_MS.NoTrt_B |
| NCAPH2    | 1.19E-06 | -0.6986 | 0.606 | 0.77 | 0.019051 | MS.Trt_vs_MS.NoTrt_B |
| MTMR9     | 1.20E-06 | -0.585  | 0.205 | 0.38 | 0.019223 | MS.Trt_vs_MS.NoTrt_B |
| C19orf60  | 1.22E-06 | -0.4414 | 0.767 | 0.91 | 0.019461 | MS.Trt_vs_MS.NoTrt_B |
| DDX10     | 1.22E-06 | -1.0693 | 0.479 | 0.71 | 0.019552 | MS.Trt_vs_MS.NoTrt_B |
| NCK1      | 1.25E-06 | 0.27268 | 0.251 | 0.48 | 0.019903 | MS.Trt_vs_MS.NoTrt_B |
| EBP       | 1.25E-06 | -0.489  | 0.129 | 0.28 | 0.020014 | MS.Trt_vs_MS.NoTrt_B |
| CCR8      | 1.29E-06 | -0.9569 | 0.063 | 0.19 | 0.020624 | MS.Trt_vs_MS.NoTrt_B |
| STRADA    | 1.30E-06 | -0.3179 | 0.405 | 0.63 | 0.020733 | MS.Trt_vs_MS.NoTrt_B |
| STXBP2    | 1.34E-06 | -0.6306 | 0.205 | 0.38 | 0.021418 | MS.Trt_vs_MS.NoTrt_B |
| USP20     | 1.34E-06 | -0.2622 | 0.168 | 0.35 | 0.021477 | MS.Trt_vs_MS.NoTrt_B |
| ACP5      | 1.35E-06 | -1.0013 | 0.063 | 0.19 | 0.021486 | MS.Trt_vs_MS.NoTrt_B |
| ITGB1BP1  | 1.37E-06 | -0.8277 | 0.107 | 0.25 | 0.021815 | MS.Trt_vs_MS.NoTrt_B |
| DRAP1     | 1.37E-06 | -0.4088 | 0.131 | 0.3  | 0.021903 | MS.Trt_vs_MS.NoTrt_B |
| ATP6V0E2  | 1.38E-06 | -0.4502 | 0.161 | 0.34 | 0.022015 | MS.Trt_vs_MS.NoTrt_B |
| TPCN1     | 1.39E-06 | 0.431   | 0.294 | 0.5  | 0.022132 | MS.Trt_vs_MS.NoTrt_B |
| UBE4B     | 1.40E-06 | -0.3238 | 0.475 | 0.7  | 0.02231  | MS.Trt_vs_MS.NoTrt_B |
| COL8A1    | 1.44E-06 | 0.50076 | 0.876 | 0.74 | 0.023014 | MS.Trt_vs_MS.NoTrt_B |
| C12orf4   | 1.44E-06 | 0.36501 | 0.453 | 0.72 | 0.023075 | MS.Trt_vs_MS.NoTrt_B |
| DNAJC9    | 1.51E-06 | -0.6343 | 0.094 | 0.24 | 0.024046 | MS.Trt_vs_MS.NoTrt_B |

|            |          |         |       |      |          |                      |
|------------|----------|---------|-------|------|----------|----------------------|
| MARS       | 1.53E-06 | -0.4651 | 0.292 | 0.49 | 0.024377 | MS.Trt_vs_MS.NoTrt_B |
| MT2A       | 1.54E-06 | -0.3618 | 0.122 | 0.28 | 0.024533 | MS.Trt_vs_MS.NoTrt_B |
| TUBE1      | 1.55E-06 | 0.2956  | 0.281 | 0.48 | 0.024733 | MS.Trt_vs_MS.NoTrt_B |
| C14orf166  | 1.55E-06 | -0.2712 | 0.473 | 0.64 | 0.024828 | MS.Trt_vs_MS.NoTrt_B |
| UQCRH      | 1.56E-06 | -0.321  | 0.427 | 0.62 | 0.024878 | MS.Trt_vs_MS.NoTrt_B |
| TSC1       | 1.56E-06 | -0.6548 | 0.333 | 0.55 | 0.024975 | MS.Trt_vs_MS.NoTrt_B |
| SLC33A1    | 1.57E-06 | -0.4761 | 0.795 | 0.89 | 0.025096 | MS.Trt_vs_MS.NoTrt_B |
| ZNF770     | 1.60E-06 | -0.7822 | 0.174 | 0.34 | 0.025543 | MS.Trt_vs_MS.NoTrt_B |
| CBX7       | 1.63E-06 | -0.4211 | 0.275 | 0.47 | 0.026    | MS.Trt_vs_MS.NoTrt_B |
| C9orf78    | 1.65E-06 | -0.3286 | 0.885 | 0.97 | 0.026366 | MS.Trt_vs_MS.NoTrt_B |
| COPZ1      | 1.66E-06 | -0.472  | 0.142 | 0.31 | 0.026556 | MS.Trt_vs_MS.NoTrt_B |
| ARSA       | 1.68E-06 | -0.4019 | 0.569 | 0.73 | 0.026803 | MS.Trt_vs_MS.NoTrt_B |
| ATP6V0C    | 1.68E-06 | -0.329  | 0.157 | 0.34 | 0.026848 | MS.Trt_vs_MS.NoTrt_B |
| MRPL28     | 1.77E-06 | -0.8148 | 0.074 | 0.21 | 0.028213 | MS.Trt_vs_MS.NoTrt_B |
| PRMT2      | 1.77E-06 | -0.3718 | 0.285 | 0.47 | 0.028262 | MS.Trt_vs_MS.NoTrt_B |
| FKBP1A     | 1.77E-06 | -0.254  | 0.242 | 0.44 | 0.028316 | MS.Trt_vs_MS.NoTrt_B |
| CDK5RAP3   | 1.79E-06 | -0.2648 | 0.464 | 0.69 | 0.028614 | MS.Trt_vs_MS.NoTrt_B |
| FLII       | 1.81E-06 | -0.3981 | 0.157 | 0.33 | 0.028973 | MS.Trt_vs_MS.NoTrt_B |
| FO538757.1 | 1.89E-06 | -0.6867 | 0.12  | 0.28 | 0.030145 | MS.Trt_vs_MS.NoTrt_B |
| NIP7       | 1.91E-06 | -0.4894 | 0.447 | 0.66 | 0.030531 | MS.Trt_vs_MS.NoTrt_B |
| CANX       | 1.97E-06 | 0.42038 | 0.575 | 0.81 | 0.031406 | MS.Trt_vs_MS.NoTrt_B |
| ABT1       | 2.00E-06 | -0.4057 | 0.12  | 0.28 | 0.032003 | MS.Trt_vs_MS.NoTrt_B |
| HNRNPU     | 2.04E-06 | 0.49253 | 0.338 | 0.56 | 0.032515 | MS.Trt_vs_MS.NoTrt_B |
| BTF3L4     | 2.04E-06 | -0.4758 | 0.336 | 0.51 | 0.03261  | MS.Trt_vs_MS.NoTrt_B |
| ZNF655     | 2.05E-06 | -0.2971 | 0.475 | 0.68 | 0.032739 | MS.Trt_vs_MS.NoTrt_B |
| ASB18      | 2.06E-06 | -0.3371 | 0.375 | 0.57 | 0.032967 | MS.Trt_vs_MS.NoTrt_B |
| COMMD10    | 2.11E-06 | 0.49585 | 0.216 | 0.41 | 0.033632 | MS.Trt_vs_MS.NoTrt_B |
| SAR1A      | 2.11E-06 | -0.2574 | 0.542 | 0.69 | 0.033666 | MS.Trt_vs_MS.NoTrt_B |
| SIGIRR     | 2.12E-06 | -0.4153 | 0.253 | 0.44 | 0.033788 | MS.Trt_vs_MS.NoTrt_B |
| PTK2B      | 2.12E-06 | -0.3174 | 0.294 | 0.49 | 0.033895 | MS.Trt_vs_MS.NoTrt_B |
| PAXIP1     | 2.15E-06 | 0.29015 | 0.309 | 0.5  | 0.034291 | MS.Trt_vs_MS.NoTrt_B |
| TNR        | 2.16E-06 | -0.288  | 0.185 | 0.36 | 0.034563 | MS.Trt_vs_MS.NoTrt_B |
| HLA-DPB1   | 2.18E-06 | -0.6643 | 0.368 | 0.53 | 0.034815 | MS.Trt_vs_MS.NoTrt_B |
| ABI2       | 2.23E-06 | -0.5702 | 0.688 | 0.84 | 0.03569  | MS.Trt_vs_MS.NoTrt_B |
| NRBP1      | 2.29E-06 | -0.6903 | 0.425 | 0.63 | 0.036623 | MS.Trt_vs_MS.NoTrt_B |
| HSP90AA1   | 2.32E-06 | -0.2949 | 0.505 | 0.68 | 0.037086 | MS.Trt_vs_MS.NoTrt_B |
| ARL6IP1    | 2.32E-06 | -0.2983 | 0.333 | 0.51 | 0.037135 | MS.Trt_vs_MS.NoTrt_B |
| STAG1      | 2.38E-06 | 0.33289 | 0.157 | 0.33 | 0.038051 | MS.Trt_vs_MS.NoTrt_B |
| SPICE1     | 2.40E-06 | -0.3829 | 0.168 | 0.35 | 0.038308 | MS.Trt_vs_MS.NoTrt_B |
| UBE2B      | 2.46E-06 | 0.37649 | 0.549 | 0.76 | 0.039357 | MS.Trt_vs_MS.NoTrt_B |

|            |          |         |       |      |          |                      |
|------------|----------|---------|-------|------|----------|----------------------|
| CD164      | 2.48E-06 | 0.31583 | 0.486 | 0.69 | 0.039619 | MS.Trt_vs_MS.NoTrt_B |
| CSK        | 2.52E-06 | -0.3139 | 0.216 | 0.41 | 0.040232 | MS.Trt_vs_MS.NoTrt_B |
| NF2        | 2.55E-06 | -0.2612 | 0.645 | 0.81 | 0.040675 | MS.Trt_vs_MS.NoTrt_B |
| HDLBP      | 2.56E-06 | -0.4681 | 0.294 | 0.48 | 0.040955 | MS.Trt_vs_MS.NoTrt_B |
| RNASEK     | 2.61E-06 | -0.494  | 0.667 | 0.73 | 0.041705 | MS.Trt_vs_MS.NoTrt_B |
| CPSF7      | 2.63E-06 | -0.3347 | 0.146 | 0.31 | 0.04193  | MS.Trt_vs_MS.NoTrt_B |
| HADHA      | 2.63E-06 | -0.3458 | 0.436 | 0.63 | 0.041973 | MS.Trt_vs_MS.NoTrt_B |
| JMJD7-PLA2 | 2.70E-06 | 0.58065 | 0.246 | 0.43 | 0.043086 | MS.Trt_vs_MS.NoTrt_B |
| PRDM2      | 2.73E-06 | -0.3777 | 0.292 | 0.48 | 0.043618 | MS.Trt_vs_MS.NoTrt_B |
| TARBP1     | 3.00E-06 | 0.27986 | 0.268 | 0.46 | 0.047886 | MS.Trt_vs_MS.NoTrt_B |
| SCN1A      | 3.01E-06 | -0.2671 | 0.255 | 0.47 | 0.04806  | MS.Trt_vs_MS.NoTrt_B |
| SNX20      | 3.07E-06 | -0.5472 | 0.32  | 0.5  | 0.048997 | MS.Trt_vs_MS.NoTrt_B |
| METTL23    | 3.07E-06 | -0.2598 | 0.124 | 0.28 | 0.049089 | MS.Trt_vs_MS.NoTrt_B |
| VDAC1      | 3.10E-06 | -0.4238 | 0.608 | 0.84 | 0.049549 | MS.Trt_vs_MS.NoTrt_B |
| C7orf73    | 3.12E-06 | -0.4271 | 0.477 | 0.67 | 0.049768 | MS.Trt_vs_MS.NoTrt_B |
| SPAG7      | 3.15E-06 | -0.3726 | 0.695 | 0.88 | 0.050342 | MS.Trt_vs_MS.NoTrt_B |
| PSMD12     | 3.17E-06 | 0.37471 | 0.606 | 0.79 | 0.050565 | MS.Trt_vs_MS.NoTrt_B |
| RAB13      | 3.19E-06 | -0.3228 | 0.403 | 0.6  | 0.051015 | MS.Trt_vs_MS.NoTrt_B |
| CCDC107    | 3.25E-06 | -0.6069 | 0.107 | 0.25 | 0.051984 | MS.Trt_vs_MS.NoTrt_B |
| NDE1       | 3.31E-06 | -0.4703 | 0.525 | 0.76 | 0.052938 | MS.Trt_vs_MS.NoTrt_B |
| RNF10      | 3.32E-06 | -0.4114 | 0.697 | 0.82 | 0.053027 | MS.Trt_vs_MS.NoTrt_B |
| GTPBP10    | 3.33E-06 | 0.34506 | 0.649 | 0.87 | 0.053113 | MS.Trt_vs_MS.NoTrt_B |
| ERVW-1     | 3.33E-06 | -0.4137 | 0.251 | 0.44 | 0.05324  | MS.Trt_vs_MS.NoTrt_B |
| SRP9       | 3.36E-06 | 0.31495 | 0.342 | 0.56 | 0.053617 | MS.Trt_vs_MS.NoTrt_B |
| GLYR1      | 3.45E-06 | -0.54   | 0.244 | 0.43 | 0.055175 | MS.Trt_vs_MS.NoTrt_B |
| ATP5I      | 3.49E-06 | 0.62065 | 0.196 | 0.39 | 0.055753 | MS.Trt_vs_MS.NoTrt_B |
| ENTPD1     | 3.50E-06 | -0.5169 | 0.863 | 0.97 | 0.055917 | MS.Trt_vs_MS.NoTrt_B |
| ZNF589     | 3.63E-06 | -0.8221 | 0.327 | 0.52 | 0.057936 | MS.Trt_vs_MS.NoTrt_B |
| RAB11FIP4  | 3.69E-06 | -0.4233 | 0.538 | 0.75 | 0.058876 | MS.Trt_vs_MS.NoTrt_B |
| NLRC3      | 3.71E-06 | -0.2581 | 0.664 | 0.77 | 0.059293 | MS.Trt_vs_MS.NoTrt_B |
| PIAS1      | 3.82E-06 | -0.4131 | 0.283 | 0.45 | 0.061064 | MS.Trt_vs_MS.NoTrt_B |
| COX5A      | 3.88E-06 | -0.5238 | 0.163 | 0.33 | 0.061951 | MS.Trt_vs_MS.NoTrt_B |
| CD48       | 3.90E-06 | -0.2895 | 0.203 | 0.38 | 0.062335 | MS.Trt_vs_MS.NoTrt_B |
| CYCS       | 3.99E-06 | -0.3219 | 0.619 | 0.79 | 0.063783 | MS.Trt_vs_MS.NoTrt_B |
| FLAD1      | 4.01E-06 | -0.6041 | 0.46  | 0.65 | 0.064099 | MS.Trt_vs_MS.NoTrt_B |
| BLZF1      | 4.18E-06 | -0.9105 | 0.307 | 0.5  | 0.066761 | MS.Trt_vs_MS.NoTrt_B |
| CAPN1      | 4.26E-06 | -0.6137 | 0.399 | 0.59 | 0.06804  | MS.Trt_vs_MS.NoTrt_B |
| RPAIN      | 4.35E-06 | -0.2995 | 0.852 | 0.97 | 0.069468 | MS.Trt_vs_MS.NoTrt_B |
| CCNYL1     | 4.43E-06 | -0.6726 | 0.272 | 0.48 | 0.070738 | MS.Trt_vs_MS.NoTrt_B |
| TBRG1      | 4.47E-06 | 0.29251 | 0.479 | 0.68 | 0.071338 | MS.Trt_vs_MS.NoTrt_B |

|          |          |         |       |      |          |                      |
|----------|----------|---------|-------|------|----------|----------------------|
| GPR180   | 4.48E-06 | -1.3555 | 0.026 | 0.11 | 0.071488 | MS.Trt_vs_MS.NoTrt_B |
| NIF3L1   | 4.48E-06 | -0.8421 | 0.046 | 0.15 | 0.071637 | MS.Trt_vs_MS.NoTrt_B |
| ARMC8    | 4.52E-06 | -0.2526 | 0.397 | 0.6  | 0.072166 | MS.Trt_vs_MS.NoTrt_B |
| PSTPIP2  | 4.58E-06 | -0.4224 | 0.24  | 0.44 | 0.073184 | MS.Trt_vs_MS.NoTrt_B |
| SERPINB6 | 4.65E-06 | 0.36055 | 0.37  | 0.58 | 0.074336 | MS.Trt_vs_MS.NoTrt_B |
| ALDH1L2  | 4.68E-06 | -0.4611 | 0.161 | 0.31 | 0.074754 | MS.Trt_vs_MS.NoTrt_B |
| STAG3    | 4.72E-06 | -0.9255 | 0.102 | 0.24 | 0.075448 | MS.Trt_vs_MS.NoTrt_B |
| NDUFAB1  | 4.77E-06 | -0.4802 | 0.124 | 0.27 | 0.076255 | MS.Trt_vs_MS.NoTrt_B |
| POLDIP3  | 4.85E-06 | -0.7297 | 0.072 | 0.2  | 0.077411 | MS.Trt_vs_MS.NoTrt_B |
| FBXL5    | 4.87E-06 | -0.3123 | 0.205 | 0.38 | 0.07775  | MS.Trt_vs_MS.NoTrt_B |
| TMEM175  | 4.95E-06 | -0.4532 | 0.22  | 0.4  | 0.079    | MS.Trt_vs_MS.NoTrt_B |
| PDCD5    | 5.01E-06 | -0.4851 | 0.137 | 0.29 | 0.080005 | MS.Trt_vs_MS.NoTrt_B |
| HDAC2    | 5.03E-06 | 0.25554 | 0.56  | 0.78 | 0.080355 | MS.Trt_vs_MS.NoTrt_B |
| DDX19B   | 5.07E-06 | -0.3594 | 0.307 | 0.48 | 0.080908 | MS.Trt_vs_MS.NoTrt_B |
| SKA2     | 5.12E-06 | 0.65063 | 0.444 | 0.65 | 0.081706 | MS.Trt_vs_MS.NoTrt_B |
| PAN2     | 5.14E-06 | -1.1293 | 0.214 | 0.38 | 0.082117 | MS.Trt_vs_MS.NoTrt_B |
| FABP4    | 5.15E-06 | 0.60859 | 0.172 | 0.04 | 0.082296 | MS.Trt_vs_MS.NoTrt_B |
| PPP3CA   | 5.16E-06 | 0.56727 | 0.423 | 0.67 | 0.082453 | MS.Trt_vs_MS.NoTrt_B |
| POM121C  | 5.23E-06 | -0.2702 | 0.353 | 0.52 | 0.083462 | MS.Trt_vs_MS.NoTrt_B |
| CCDC12   | 5.27E-06 | -0.5502 | 0.216 | 0.4  | 0.08423  | MS.Trt_vs_MS.NoTrt_B |
| C17orf62 | 5.42E-06 | -0.4446 | 0.595 | 0.75 | 0.086613 | MS.Trt_vs_MS.NoTrt_B |
| HMGB2    | 5.43E-06 | -0.2837 | 0.209 | 0.39 | 0.086701 | MS.Trt_vs_MS.NoTrt_B |
| ABL2     | 5.54E-06 | 0.44118 | 0.573 | 0.83 | 0.088461 | MS.Trt_vs_MS.NoTrt_B |
| TCEANC2  | 5.55E-06 | -0.5439 | 0.752 | 0.92 | 0.088574 | MS.Trt_vs_MS.NoTrt_B |
| TRAF1    | 5.63E-06 | -0.3131 | 0.211 | 0.4  | 0.089955 | MS.Trt_vs_MS.NoTrt_B |
| HDAC3    | 5.73E-06 | -1.439  | 0.061 | 0.17 | 0.091585 | MS.Trt_vs_MS.NoTrt_B |
| RBM5     | 5.75E-06 | -0.3851 | 0.749 | 0.9  | 0.091873 | MS.Trt_vs_MS.NoTrt_B |
| FLI1     | 5.84E-06 | -0.2755 | 0.359 | 0.55 | 0.093354 | MS.Trt_vs_MS.NoTrt_B |
| HMBOX1   | 5.90E-06 | -0.503  | 0.39  | 0.58 | 0.094234 | MS.Trt_vs_MS.NoTrt_B |
| NFKBIZ   | 6.11E-06 | -0.4214 | 0.231 | 0.41 | 0.097626 | MS.Trt_vs_MS.NoTrt_B |
| TP63     | 6.15E-06 | -0.307  | 0.303 | 0.49 | 0.098165 | MS.Trt_vs_MS.NoTrt_B |
| MAX      | 6.19E-06 | 0.31325 | 0.373 | 0.62 | 0.098943 | MS.Trt_vs_MS.NoTrt_B |
| AMBRA1   | 6.26E-06 | -0.8992 | 0.124 | 0.27 | 0.099929 | MS.Trt_vs_MS.NoTrt_B |
| CSNK1G1  | 6.27E-06 | -0.4078 | 0.423 | 0.61 | 0.100221 | MS.Trt_vs_MS.NoTrt_B |
| DUSP28   | 6.31E-06 | -0.5806 | 0.584 | 0.73 | 0.100729 | MS.Trt_vs_MS.NoTrt_B |
| CCND2    | 6.31E-06 | -0.2854 | 0.257 | 0.44 | 0.100747 | MS.Trt_vs_MS.NoTrt_B |
| TUBA4A   | 6.31E-06 | -0.6092 | 0.159 | 0.31 | 0.100824 | MS.Trt_vs_MS.NoTrt_B |
| ERLEC1   | 6.50E-06 | 0.29419 | 0.285 | 0.5  | 0.103836 | MS.Trt_vs_MS.NoTrt_B |
| DTX2     | 6.55E-06 | -0.3472 | 0.283 | 0.45 | 0.104619 | MS.Trt_vs_MS.NoTrt_B |
| SPNS1    | 6.57E-06 | -0.4682 | 0.667 | 0.86 | 0.104888 | MS.Trt_vs_MS.NoTrt_B |

|         |          |         |       |      |          |                      |
|---------|----------|---------|-------|------|----------|----------------------|
| CDK7    | 6.70E-06 | -1.0542 | 0.094 | 0.22 | 0.107034 | MS.Trt_vs_MS.NoTrt_B |
| ZKSCAN3 | 6.84E-06 | -0.3058 | 0.68  | 0.84 | 0.109189 | MS.Trt_vs_MS.NoTrt_B |
| MED28   | 6.92E-06 | -0.4759 | 0.743 | 0.86 | 0.110566 | MS.Trt_vs_MS.NoTrt_B |
| HEXA    | 7.09E-06 | -0.5874 | 0.597 | 0.76 | 0.113192 | MS.Trt_vs_MS.NoTrt_B |
| ACVR2B  | 7.20E-06 | -0.5634 | 0.298 | 0.49 | 0.115008 | MS.Trt_vs_MS.NoTrt_B |
| ZNF577  | 7.27E-06 | 0.39534 | 0.237 | 0.43 | 0.1162   | MS.Trt_vs_MS.NoTrt_B |
| SUPT4H1 | 7.33E-06 | -0.2974 | 0.131 | 0.28 | 0.11707  | MS.Trt_vs_MS.NoTrt_B |
| PLEKHG2 | 7.36E-06 | -0.4731 | 0.706 | 0.87 | 0.117517 | MS.Trt_vs_MS.NoTrt_B |
| XPNPEP1 | 7.45E-06 | -0.9896 | 0.192 | 0.35 | 0.119021 | MS.Trt_vs_MS.NoTrt_B |
| CD82    | 7.50E-06 | -0.58   | 0.497 | 0.68 | 0.119747 | MS.Trt_vs_MS.NoTrt_B |
| RNF7    | 7.57E-06 | -0.5225 | 0.549 | 0.72 | 0.120953 | MS.Trt_vs_MS.NoTrt_B |
| ELP5    | 7.63E-06 | -1.1621 | 0.048 | 0.15 | 0.121804 | MS.Trt_vs_MS.NoTrt_B |
| ATP6AP2 | 7.64E-06 | -0.2657 | 0.71  | 0.85 | 0.121972 | MS.Trt_vs_MS.NoTrt_B |
| KANSL1  | 7.67E-06 | -0.4752 | 0.562 | 0.73 | 0.122496 | MS.Trt_vs_MS.NoTrt_B |
| ANP32E  | 7.68E-06 | 0.37976 | 0.37  | 0.58 | 0.122684 | MS.Trt_vs_MS.NoTrt_B |
| EIF3H   | 7.70E-06 | -0.3501 | 0.484 | 0.66 | 0.122955 | MS.Trt_vs_MS.NoTrt_B |
| TTC31   | 7.76E-06 | -0.876  | 0.146 | 0.29 | 0.123885 | MS.Trt_vs_MS.NoTrt_B |
| DDRKG1  | 7.76E-06 | -1.2812 | 0.081 | 0.2  | 0.123956 | MS.Trt_vs_MS.NoTrt_B |
| SMAP1   | 7.77E-06 | -0.9174 | 0.109 | 0.24 | 0.124102 | MS.Trt_vs_MS.NoTrt_B |
| HELLS   | 7.82E-06 | -0.315  | 0.651 | 0.84 | 0.124952 | MS.Trt_vs_MS.NoTrt_B |
| KDEL2   | 7.86E-06 | -0.6778 | 0.102 | 0.23 | 0.125485 | MS.Trt_vs_MS.NoTrt_B |
| LRRC28  | 7.86E-06 | -0.9503 | 0.381 | 0.56 | 0.125545 | MS.Trt_vs_MS.NoTrt_B |
| ACP7    | 7.87E-06 | -0.3388 | 0.305 | 0.49 | 0.125756 | MS.Trt_vs_MS.NoTrt_B |
| ZBTB25  | 7.93E-06 | 0.25313 | 0.891 | 0.95 | 0.1267   | MS.Trt_vs_MS.NoTrt_B |
| TMEM230 | 7.96E-06 | 0.3309  | 0.331 | 0.52 | 0.127134 | MS.Trt_vs_MS.NoTrt_B |
| SLBP    | 8.02E-06 | -0.7388 | 0.078 | 0.2  | 0.128137 | MS.Trt_vs_MS.NoTrt_B |
| PRPF3   | 8.03E-06 | -0.6977 | 0.743 | 0.86 | 0.128194 | MS.Trt_vs_MS.NoTrt_B |
| NUMB    | 8.08E-06 | -0.4666 | 0.601 | 0.76 | 0.128999 | MS.Trt_vs_MS.NoTrt_B |
| SNRPD2  | 8.13E-06 | 0.28046 | 0.477 | 0.7  | 0.129923 | MS.Trt_vs_MS.NoTrt_B |
| ABCF2   | 8.19E-06 | -0.8336 | 0.161 | 0.32 | 0.130843 | MS.Trt_vs_MS.NoTrt_B |
| BIRC3   | 8.23E-06 | 0.26352 | 0.481 | 0.69 | 0.131533 | MS.Trt_vs_MS.NoTrt_B |
| MAN2B1  | 8.25E-06 | -0.625  | 0.484 | 0.68 | 0.131734 | MS.Trt_vs_MS.NoTrt_B |
| BCAS1   | 8.28E-06 | -1.7904 | 0.251 | 0.42 | 0.132191 | MS.Trt_vs_MS.NoTrt_B |
| CAPRIN1 | 8.42E-06 | -0.3032 | 0.222 | 0.4  | 0.134425 | MS.Trt_vs_MS.NoTrt_B |
| GLE1    | 8.44E-06 | -0.7829 | 0.065 | 0.18 | 0.134818 | MS.Trt_vs_MS.NoTrt_B |
| PPM1G   | 8.55E-06 | -0.2967 | 0.542 | 0.77 | 0.136554 | MS.Trt_vs_MS.NoTrt_B |
| DERL2   | 8.68E-06 | 0.64154 | 0.2   | 0.37 | 0.138607 | MS.Trt_vs_MS.NoTrt_B |
| DDX27   | 8.70E-06 | -0.268  | 0.51  | 0.68 | 0.138995 | MS.Trt_vs_MS.NoTrt_B |
| GFPT1   | 8.71E-06 | -0.5613 | 0.545 | 0.74 | 0.139114 | MS.Trt_vs_MS.NoTrt_B |
| ZYX     | 8.78E-06 | -0.305  | 0.207 | 0.38 | 0.140251 | MS.Trt_vs_MS.NoTrt_B |

|            |          |         |       |      |          |                      |
|------------|----------|---------|-------|------|----------|----------------------|
| PPP3CC     | 8.78E-06 | -0.3485 | 0.12  | 0.27 | 0.14032  | MS.Trt_vs_MS.NoTrt_B |
| ARV1       | 8.80E-06 | 0.40726 | 0.155 | 0.31 | 0.140499 | MS.Trt_vs_MS.NoTrt_B |
| SSNA1      | 8.89E-06 | -0.6545 | 0.096 | 0.23 | 0.141965 | MS.Trt_vs_MS.NoTrt_B |
| DPYD       | 9.06E-06 | -0.6476 | 0.359 | 0.52 | 0.144646 | MS.Trt_vs_MS.NoTrt_B |
| NUDT9      | 9.19E-06 | 0.39733 | 0.373 | 0.59 | 0.146833 | MS.Trt_vs_MS.NoTrt_B |
| ALG14      | 9.20E-06 | -0.469  | 0.786 | 0.93 | 0.147001 | MS.Trt_vs_MS.NoTrt_B |
| RSRP1      | 9.25E-06 | -0.2637 | 0.839 | 0.95 | 0.147675 | MS.Trt_vs_MS.NoTrt_B |
| CCDC25     | 9.28E-06 | 0.70035 | 0.168 | 0.34 | 0.148265 | MS.Trt_vs_MS.NoTrt_B |
| SIPA1L3    | 9.49E-06 | -0.412  | 0.501 | 0.71 | 0.151643 | MS.Trt_vs_MS.NoTrt_B |
| CAMK4      | 9.66E-06 | 0.26121 | 0.503 | 0.7  | 0.154358 | MS.Trt_vs_MS.NoTrt_B |
| RP1-2705.3 | 9.85E-06 | -0.2532 | 0.111 | 0.25 | 0.157277 | MS.Trt_vs_MS.NoTrt_B |
| DHX36      | 9.92E-06 | 0.32472 | 0.56  | 0.77 | 0.158448 | MS.Trt_vs_MS.NoTrt_B |
| TOP3B      | 9.97E-06 | -0.8089 | 0.089 | 0.22 | 0.159279 | MS.Trt_vs_MS.NoTrt_B |
| TFB1M      | 1.01E-05 | -0.338  | 0.301 | 0.48 | 0.161698 | MS.Trt_vs_MS.NoTrt_B |
| MAZ        | 1.02E-05 | -0.8662 | 0.102 | 0.23 | 0.163279 | MS.Trt_vs_MS.NoTrt_B |
| COTL1      | 1.03E-05 | -0.2962 | 0.767 | 0.91 | 0.163967 | MS.Trt_vs_MS.NoTrt_B |
| PSMA1      | 1.03E-05 | 0.42957 | 0.261 | 0.47 | 0.16452  | MS.Trt_vs_MS.NoTrt_B |
| RNF26      | 1.04E-05 | -1.0187 | 0.076 | 0.2  | 0.166744 | MS.Trt_vs_MS.NoTrt_B |
| ARHGEF6    | 1.05E-05 | -0.3089 | 0.246 | 0.42 | 0.167418 | MS.Trt_vs_MS.NoTrt_B |
| ARHGEF39   | 1.05E-05 | -0.9427 | 0.497 | 0.7  | 0.167939 | MS.Trt_vs_MS.NoTrt_B |
| FIS1       | 1.07E-05 | -0.7007 | 0.172 | 0.32 | 0.171511 | MS.Trt_vs_MS.NoTrt_B |
| GATC       | 1.08E-05 | 0.412   | 0.451 | 0.67 | 0.172691 | MS.Trt_vs_MS.NoTrt_B |
| CYBA       | 1.08E-05 | -0.3555 | 0.159 | 0.31 | 0.173114 | MS.Trt_vs_MS.NoTrt_B |
| RNASSET2   | 1.12E-05 | -0.2698 | 0.307 | 0.48 | 0.178309 | MS.Trt_vs_MS.NoTrt_B |
| ARL5A      | 1.14E-05 | -0.3286 | 0.092 | 0.22 | 0.182141 | MS.Trt_vs_MS.NoTrt_B |
| ADCY7      | 1.17E-05 | -0.3334 | 0.617 | 0.77 | 0.187106 | MS.Trt_vs_MS.NoTrt_B |
| TINF2      | 1.19E-05 | -0.4474 | 0.688 | 0.87 | 0.189536 | MS.Trt_vs_MS.NoTrt_B |
| AIFM1      | 1.19E-05 | -0.5424 | 0.355 | 0.56 | 0.189793 | MS.Trt_vs_MS.NoTrt_B |
| NADK2      | 1.20E-05 | -0.2834 | 0.283 | 0.47 | 0.191467 | MS.Trt_vs_MS.NoTrt_B |
| MRPL3      | 1.23E-05 | -0.3007 | 0.375 | 0.58 | 0.195767 | MS.Trt_vs_MS.NoTrt_B |
| TSPAN32    | 1.28E-05 | -0.3653 | 0.17  | 0.33 | 0.203886 | MS.Trt_vs_MS.NoTrt_B |
| PSMC5      | 1.28E-05 | -0.4481 | 0.244 | 0.42 | 0.203951 | MS.Trt_vs_MS.NoTrt_B |
| NT5C2      | 1.28E-05 | -0.6481 | 0.59  | 0.77 | 0.204811 | MS.Trt_vs_MS.NoTrt_B |
| STOML1     | 1.29E-05 | -0.785  | 0.634 | 0.82 | 0.205936 | MS.Trt_vs_MS.NoTrt_B |
| CCR10      | 1.29E-05 | -1.1168 | 0.057 | 0.16 | 0.20611  | MS.Trt_vs_MS.NoTrt_B |
| GNL3L      | 1.29E-05 | -0.2565 | 0.821 | 0.96 | 0.206356 | MS.Trt_vs_MS.NoTrt_B |
| TMEM116    | 1.30E-05 | 0.44309 | 0.732 | 0.9  | 0.207101 | MS.Trt_vs_MS.NoTrt_B |
| NAIP       | 1.31E-05 | -0.7526 | 0.505 | 0.68 | 0.209103 | MS.Trt_vs_MS.NoTrt_B |
| LIPT1      | 1.32E-05 | -0.3347 | 0.523 | 0.72 | 0.210203 | MS.Trt_vs_MS.NoTrt_B |
| NOSIP      | 1.34E-05 | -0.2705 | 0.438 | 0.61 | 0.213354 | MS.Trt_vs_MS.NoTrt_B |

|          |          |         |       |      |          |                      |
|----------|----------|---------|-------|------|----------|----------------------|
| SNAP23   | 1.34E-05 | -0.3236 | 0.501 | 0.7  | 0.214782 | MS.Trt_vs_MS.NoTrt_B |
| IGBP1    | 1.35E-05 | -0.7022 | 0.133 | 0.28 | 0.21514  | MS.Trt_vs_MS.NoTrt_B |
| NEB      | 1.36E-05 | -0.5066 | 0.401 | 0.62 | 0.217019 | MS.Trt_vs_MS.NoTrt_B |
| HELZ2    | 1.38E-05 | -0.4696 | 0.499 | 0.7  | 0.219755 | MS.Trt_vs_MS.NoTrt_B |
| OAZ2     | 1.40E-05 | -0.5424 | 0.627 | 0.83 | 0.22336  | MS.Trt_vs_MS.NoTrt_B |
| SNRBP2   | 1.41E-05 | -0.5377 | 0.137 | 0.28 | 0.224962 | MS.Trt_vs_MS.NoTrt_B |
| RAP2C    | 1.41E-05 | -0.5759 | 0.198 | 0.36 | 0.225341 | MS.Trt_vs_MS.NoTrt_B |
| RNASEH2B | 1.41E-05 | 0.31228 | 0.588 | 0.82 | 0.22569  | MS.Trt_vs_MS.NoTrt_B |
| MED4     | 1.42E-05 | 0.34933 | 0.564 | 0.72 | 0.226959 | MS.Trt_vs_MS.NoTrt_B |
| SART3    | 1.44E-05 | -1.011  | 0.089 | 0.21 | 0.22962  | MS.Trt_vs_MS.NoTrt_B |
| RNASEH2A | 1.44E-05 | -0.2804 | 0.795 | 0.95 | 0.23021  | MS.Trt_vs_MS.NoTrt_B |
| VAMP3    | 1.44E-05 | -0.2913 | 0.214 | 0.38 | 0.230412 | MS.Trt_vs_MS.NoTrt_B |
| ZNF721   | 1.44E-05 | -0.8084 | 0.248 | 0.41 | 0.230501 | MS.Trt_vs_MS.NoTrt_B |
| RANGAP1  | 1.46E-05 | -0.2661 | 0.508 | 0.71 | 0.23304  | MS.Trt_vs_MS.NoTrt_B |
| HERC3    | 1.47E-05 | -0.3045 | 0.218 | 0.38 | 0.234258 | MS.Trt_vs_MS.NoTrt_B |
| PQLC3    | 1.47E-05 | -0.4887 | 0.102 | 0.23 | 0.234346 | MS.Trt_vs_MS.NoTrt_B |
| PRNP     | 1.47E-05 | -0.4876 | 0.126 | 0.27 | 0.234391 | MS.Trt_vs_MS.NoTrt_B |
| ATP8B1   | 1.47E-05 | -0.6121 | 0.153 | 0.3  | 0.234634 | MS.Trt_vs_MS.NoTrt_B |
| DHRX     | 1.48E-05 | -0.6341 | 0.584 | 0.77 | 0.235642 | MS.Trt_vs_MS.NoTrt_B |
| AIM1     | 1.48E-05 | -0.3874 | 0.359 | 0.55 | 0.235666 | MS.Trt_vs_MS.NoTrt_B |
| YBEY     | 1.48E-05 | -1.0671 | 0.035 | 0.12 | 0.23585  | MS.Trt_vs_MS.NoTrt_B |
| ZKSCAN5  | 1.48E-05 | -0.2879 | 0.401 | 0.61 | 0.235911 | MS.Trt_vs_MS.NoTrt_B |
| CDKN1B   | 1.49E-05 | -0.2885 | 0.216 | 0.38 | 0.238499 | MS.Trt_vs_MS.NoTrt_B |
| DNAJB12  | 1.52E-05 | -0.6483 | 0.063 | 0.17 | 0.243253 | MS.Trt_vs_MS.NoTrt_B |
| USF1     | 1.53E-05 | -2.5167 | 0.102 | 0.22 | 0.243693 | MS.Trt_vs_MS.NoTrt_B |
| MPI      | 1.53E-05 | -0.8604 | 0.383 | 0.54 | 0.24411  | MS.Trt_vs_MS.NoTrt_B |
| TMEM165  | 1.53E-05 | -0.27   | 0.512 | 0.71 | 0.244429 | MS.Trt_vs_MS.NoTrt_B |
| TGM2     | 1.58E-05 | -0.2596 | 0.401 | 0.6  | 0.252403 | MS.Trt_vs_MS.NoTrt_B |
| FBXO11   | 1.60E-05 | 0.77328 | 0.301 | 0.49 | 0.254777 | MS.Trt_vs_MS.NoTrt_B |
| MRPS6    | 1.60E-05 | -0.5495 | 0.126 | 0.27 | 0.255573 | MS.Trt_vs_MS.NoTrt_B |
| USP45    | 1.60E-05 | -0.7354 | 0.115 | 0.25 | 0.255671 | MS.Trt_vs_MS.NoTrt_B |
| NDUFS4   | 1.62E-05 | -0.779  | 0.168 | 0.31 | 0.259526 | MS.Trt_vs_MS.NoTrt_B |
| GIN1     | 1.63E-05 | 0.94371 | 0.244 | 0.43 | 0.260001 | MS.Trt_vs_MS.NoTrt_B |
| RFTN1    | 1.63E-05 | -0.4843 | 0.277 | 0.45 | 0.260012 | MS.Trt_vs_MS.NoTrt_B |
| C15orf52 | 1.63E-05 | -0.9584 | 0.285 | 0.48 | 0.260943 | MS.Trt_vs_MS.NoTrt_B |
| PSMD9    | 1.63E-05 | -0.3119 | 0.904 | 0.98 | 0.260947 | MS.Trt_vs_MS.NoTrt_B |
| CAPRIN2  | 1.65E-05 | -0.6021 | 0.532 | 0.77 | 0.264002 | MS.Trt_vs_MS.NoTrt_B |
| FBXO40   | 1.69E-05 | 0.38012 | 0.176 | 0.34 | 0.270246 | MS.Trt_vs_MS.NoTrt_B |
| SUPT7L   | 1.72E-05 | -0.4295 | 0.344 | 0.54 | 0.275163 | MS.Trt_vs_MS.NoTrt_B |
| ZNF783   | 1.75E-05 | -0.7183 | 0.344 | 0.54 | 0.279031 | MS.Trt_vs_MS.NoTrt_B |

|            |          |         |       |      |          |                      |
|------------|----------|---------|-------|------|----------|----------------------|
| TRIM4      | 1.75E-05 | 0.30436 | 0.414 | 0.62 | 0.279136 | MS.Trt_vs_MS.NoTrt_B |
| GMPR2      | 1.75E-05 | -1.1306 | 0.076 | 0.19 | 0.279248 | MS.Trt_vs_MS.NoTrt_B |
| PPP2R3B    | 1.75E-05 | -1.1172 | 0.333 | 0.53 | 0.279399 | MS.Trt_vs_MS.NoTrt_B |
| RGL4       | 1.75E-05 | -0.3296 | 0.142 | 0.29 | 0.280303 | MS.Trt_vs_MS.NoTrt_B |
| PTCD3      | 1.77E-05 | -0.2904 | 0.767 | 0.94 | 0.282904 | MS.Trt_vs_MS.NoTrt_B |
| NSA2       | 1.82E-05 | -0.4479 | 0.242 | 0.41 | 0.290633 | MS.Trt_vs_MS.NoTrt_B |
| GRIPAP1    | 1.82E-05 | -0.4798 | 0.575 | 0.77 | 0.290895 | MS.Trt_vs_MS.NoTrt_B |
| PRPF6      | 1.86E-05 | -0.6314 | 0.124 | 0.26 | 0.297362 | MS.Trt_vs_MS.NoTrt_B |
| RALB       | 1.87E-05 | -1.5339 | 0.031 | 0.11 | 0.298064 | MS.Trt_vs_MS.NoTrt_B |
| DDX42      | 1.91E-05 | 0.61554 | 0.257 | 0.45 | 0.304538 | MS.Trt_vs_MS.NoTrt_B |
| TCHP       | 1.93E-05 | -0.6202 | 0.381 | 0.55 | 0.307584 | MS.Trt_vs_MS.NoTrt_B |
| NUP107     | 1.94E-05 | -0.5391 | 0.597 | 0.78 | 0.309738 | MS.Trt_vs_MS.NoTrt_B |
| ZNF576     | 1.94E-05 | -0.2583 | 0.397 | 0.6  | 0.309943 | MS.Trt_vs_MS.NoTrt_B |
| FAM126A    | 1.96E-05 | 0.8013  | 0.497 | 0.73 | 0.31364  | MS.Trt_vs_MS.NoTrt_B |
| TUBA1A     | 1.99E-05 | -0.4619 | 0.187 | 0.34 | 0.317964 | MS.Trt_vs_MS.NoTrt_B |
| RGS10      | 2.02E-05 | -0.3463 | 0.166 | 0.31 | 0.322506 | MS.Trt_vs_MS.NoTrt_B |
| USP34      | 2.05E-05 | 0.36679 | 0.481 | 0.68 | 0.32776  | MS.Trt_vs_MS.NoTrt_B |
| CTSS       | 2.08E-05 | -0.3112 | 0.556 | 0.73 | 0.332008 | MS.Trt_vs_MS.NoTrt_B |
| KLHL5      | 2.09E-05 | -0.3808 | 0.331 | 0.53 | 0.334378 | MS.Trt_vs_MS.NoTrt_B |
| TPI1       | 2.11E-05 | -0.2917 | 0.403 | 0.6  | 0.337725 | MS.Trt_vs_MS.NoTrt_B |
| RANBP3     | 2.12E-05 | -0.2913 | 0.601 | 0.81 | 0.339029 | MS.Trt_vs_MS.NoTrt_B |
| GALE       | 2.13E-05 | 0.27145 | 0.192 | 0.36 | 0.340483 | MS.Trt_vs_MS.NoTrt_B |
| MAST4      | 2.20E-05 | -0.4494 | 0.481 | 0.65 | 0.351058 | MS.Trt_vs_MS.NoTrt_B |
| GDAP2      | 2.20E-05 | -0.7427 | 0.549 | 0.74 | 0.351639 | MS.Trt_vs_MS.NoTrt_B |
| AHSA2      | 2.21E-05 | 0.37154 | 0.166 | 0.32 | 0.35274  | MS.Trt_vs_MS.NoTrt_B |
| DIS3L2     | 2.22E-05 | -0.7258 | 0.333 | 0.5  | 0.353981 | MS.Trt_vs_MS.NoTrt_B |
| DTWD1      | 2.22E-05 | 0.38223 | 0.436 | 0.65 | 0.354362 | MS.Trt_vs_MS.NoTrt_B |
| 9-Sep      | 2.22E-05 | 0.45039 | 0.42  | 0.67 | 0.355138 | MS.Trt_vs_MS.NoTrt_B |
| RP11-449H3 | 2.24E-05 | -0.4906 | 0.172 | 0.32 | 0.357739 | MS.Trt_vs_MS.NoTrt_B |
| SLC2A8     | 2.26E-05 | -0.939  | 0.196 | 0.35 | 0.361597 | MS.Trt_vs_MS.NoTrt_B |
| DPP8       | 2.30E-05 | -0.5408 | 0.29  | 0.47 | 0.367304 | MS.Trt_vs_MS.NoTrt_B |
| RAD21      | 2.30E-05 | 0.38671 | 0.298 | 0.48 | 0.367572 | MS.Trt_vs_MS.NoTrt_B |
| DMPK       | 2.30E-05 | 0.34045 | 0.46  | 0.68 | 0.367653 | MS.Trt_vs_MS.NoTrt_B |
| COX5B      | 2.31E-05 | 0.32354 | 0.682 | 0.83 | 0.368212 | MS.Trt_vs_MS.NoTrt_B |
| SVBP       | 2.31E-05 | -0.7279 | 0.076 | 0.19 | 0.368506 | MS.Trt_vs_MS.NoTrt_B |
| ARL16      | 2.38E-05 | -0.6527 | 0.614 | 0.8  | 0.380429 | MS.Trt_vs_MS.NoTrt_B |
| MRPL52     | 2.39E-05 | 0.71492 | 0.473 | 0.67 | 0.381226 | MS.Trt_vs_MS.NoTrt_B |
| PSPC1      | 2.39E-05 | -0.4493 | 0.218 | 0.37 | 0.381977 | MS.Trt_vs_MS.NoTrt_B |
| MIXL1      | 2.41E-05 | 0.37281 | 0.619 | 0.42 | 0.385605 | MS.Trt_vs_MS.NoTrt_B |
| ASNS       | 2.42E-05 | -0.897  | 0.163 | 0.3  | 0.386455 | MS.Trt_vs_MS.NoTrt_B |



|          |          |         |       |      |          |                      |
|----------|----------|---------|-------|------|----------|----------------------|
| PNPLA4   | 2.43E-05 | 0.5433  | 0.176 | 0.34 | 0.387641 | MS.Trt_vs_MS.NoTrt_B |
| STAT3    | 2.54E-05 | -0.344  | 0.636 | 0.82 | 0.405174 | MS.Trt_vs_MS.NoTrt_B |
| DBNL     | 2.54E-05 | -0.2672 | 0.351 | 0.51 | 0.405671 | MS.Trt_vs_MS.NoTrt_B |
| KDM4A    | 2.56E-05 | -0.7689 | 0.061 | 0.17 | 0.408685 | MS.Trt_vs_MS.NoTrt_B |
| TBCC     | 2.58E-05 | -0.3276 | 0.259 | 0.43 | 0.411685 | MS.Trt_vs_MS.NoTrt_B |
| BIRC2    | 2.59E-05 | -0.3722 | 0.089 | 0.21 | 0.413592 | MS.Trt_vs_MS.NoTrt_B |
| GMPPA    | 2.61E-05 | -0.2674 | 0.161 | 0.31 | 0.416807 | MS.Trt_vs_MS.NoTrt_B |
| FBXO32   | 2.62E-05 | -0.6579 | 0.098 | 0.22 | 0.417999 | MS.Trt_vs_MS.NoTrt_B |
| SEC61A1  | 2.62E-05 | -0.3466 | 0.253 | 0.42 | 0.418785 | MS.Trt_vs_MS.NoTrt_B |
| HIBCH    | 2.63E-05 | -0.6524 | 0.139 | 0.28 | 0.41954  | MS.Trt_vs_MS.NoTrt_B |
| KAT2B    | 2.70E-05 | 0.60791 | 0.115 | 0.25 | 0.430956 | MS.Trt_vs_MS.NoTrt_B |
| LRR1     | 2.71E-05 | -2.2748 | 0.057 | 0.16 | 0.432969 | MS.Trt_vs_MS.NoTrt_B |
| HLA-C    | 2.72E-05 | -0.4072 | 0.85  | 0.92 | 0.434901 | MS.Trt_vs_MS.NoTrt_B |
| ASAP3    | 2.74E-05 | -0.4257 | 0.379 | 0.58 | 0.438334 | MS.Trt_vs_MS.NoTrt_B |
| RNF6     | 2.75E-05 | -0.3194 | 0.098 | 0.22 | 0.438561 | MS.Trt_vs_MS.NoTrt_B |
| GARS     | 2.77E-05 | -0.4109 | 0.146 | 0.29 | 0.441817 | MS.Trt_vs_MS.NoTrt_B |
| LAIR2    | 2.78E-05 | -0.7484 | 0.057 | 0.16 | 0.44355  | MS.Trt_vs_MS.NoTrt_B |
| MTIF3    | 2.82E-05 | -0.6221 | 0.102 | 0.23 | 0.450813 | MS.Trt_vs_MS.NoTrt_B |
| ZNF266   | 2.83E-05 | -0.4922 | 0.235 | 0.4  | 0.451314 | MS.Trt_vs_MS.NoTrt_B |
| ADH5     | 2.84E-05 | 0.28233 | 0.309 | 0.5  | 0.452941 | MS.Trt_vs_MS.NoTrt_B |
| TOR3A    | 2.84E-05 | -0.894  | 0.719 | 0.85 | 0.453745 | MS.Trt_vs_MS.NoTrt_B |
| VLDLR    | 2.97E-05 | -0.3109 | 0.316 | 0.5  | 0.473872 | MS.Trt_vs_MS.NoTrt_B |
| SLC2A3   | 3.02E-05 | -0.2899 | 0.632 | 0.81 | 0.481793 | MS.Trt_vs_MS.NoTrt_B |
| IDNK     | 3.02E-05 | -0.3102 | 0.272 | 0.45 | 0.482174 | MS.Trt_vs_MS.NoTrt_B |
| DHRS4    | 3.05E-05 | -0.7789 | 0.063 | 0.17 | 0.487064 | MS.Trt_vs_MS.NoTrt_B |
| TNIP3    | 3.17E-05 | -0.6101 | 0.368 | 0.56 | 0.506402 | MS.Trt_vs_MS.NoTrt_B |
| MAP4K3   | 3.18E-05 | -0.6362 | 0.028 | 0.11 | 0.507278 | MS.Trt_vs_MS.NoTrt_B |
| AP1S1    | 3.18E-05 | -0.2812 | 0.031 | 0.11 | 0.508433 | MS.Trt_vs_MS.NoTrt_B |
| MRPS23   | 3.29E-05 | -0.5505 | 0.658 | 0.82 | 0.524878 | MS.Trt_vs_MS.NoTrt_B |
| UTP20    | 3.30E-05 | 0.78227 | 0.368 | 0.57 | 0.526387 | MS.Trt_vs_MS.NoTrt_B |
| THEMIS2  | 3.33E-05 | -0.4731 | 0.081 | 0.2  | 0.53224  | MS.Trt_vs_MS.NoTrt_B |
| BMS1     | 3.34E-05 | -0.3191 | 0.394 | 0.58 | 0.533443 | MS.Trt_vs_MS.NoTrt_B |
| SVIP     | 3.35E-05 | -0.3733 | 0.39  | 0.57 | 0.535611 | MS.Trt_vs_MS.NoTrt_B |
| KIAA1614 | 3.36E-05 | 0.45208 | 0.181 | 0.34 | 0.53736  | MS.Trt_vs_MS.NoTrt_B |
| C11orf21 | 3.37E-05 | -0.8749 | 0.081 | 0.2  | 0.537974 | MS.Trt_vs_MS.NoTrt_B |
| ZRANB2   | 3.37E-05 | 0.49764 | 0.303 | 0.49 | 0.538118 | MS.Trt_vs_MS.NoTrt_B |
| NOP14    | 3.41E-05 | -0.4705 | 0.314 | 0.5  | 0.544559 | MS.Trt_vs_MS.NoTrt_B |
| IQCC     | 3.41E-05 | 0.52064 | 0.427 | 0.67 | 0.545213 | MS.Trt_vs_MS.NoTrt_B |
| ZNF215   | 3.43E-05 | -0.2612 | 0.283 | 0.45 | 0.547852 | MS.Trt_vs_MS.NoTrt_B |
| SEMA3C   | 3.48E-05 | -0.2969 | 0.503 | 0.7  | 0.555067 | MS.Trt_vs_MS.NoTrt_B |

|            |          |         |       |      |          |                      |
|------------|----------|---------|-------|------|----------|----------------------|
| ATP5S      | 3.48E-05 | -0.3852 | 0.793 | 0.93 | 0.556082 | MS.Trt_vs_MS.NoTrt_B |
| KIAA0391   | 3.48E-05 | -0.2931 | 0.573 | 0.75 | 0.556336 | MS.Trt_vs_MS.NoTrt_B |
| PEX16      | 3.50E-05 | -0.511  | 0.582 | 0.8  | 0.559008 | MS.Trt_vs_MS.NoTrt_B |
| BSDC1      | 3.50E-05 | -0.5827 | 0.353 | 0.51 | 0.559548 | MS.Trt_vs_MS.NoTrt_B |
| SH3GL1     | 3.56E-05 | -0.3356 | 0.634 | 0.78 | 0.567969 | MS.Trt_vs_MS.NoTrt_B |
| SMYD2      | 3.56E-05 | -0.3595 | 0.094 | 0.21 | 0.568165 | MS.Trt_vs_MS.NoTrt_B |
| CCDC191    | 3.60E-05 | -0.3675 | 0.155 | 0.3  | 0.5755   | MS.Trt_vs_MS.NoTrt_B |
| PCBP1      | 3.62E-05 | 0.31277 | 0.342 | 0.53 | 0.578576 | MS.Trt_vs_MS.NoTrt_B |
| ZNF428     | 3.67E-05 | -0.5699 | 0.113 | 0.23 | 0.585832 | MS.Trt_vs_MS.NoTrt_B |
| C4orf3     | 3.68E-05 | 0.26299 | 0.447 | 0.62 | 0.587096 | MS.Trt_vs_MS.NoTrt_B |
| EMD        | 3.69E-05 | -0.4074 | 0.187 | 0.34 | 0.589147 | MS.Trt_vs_MS.NoTrt_B |
| GLYCTK     | 3.74E-05 | -0.4509 | 0.063 | 0.17 | 0.597541 | MS.Trt_vs_MS.NoTrt_B |
| CES4A      | 3.76E-05 | -0.3496 | 0.416 | 0.59 | 0.601358 | MS.Trt_vs_MS.NoTrt_B |
| DHX16      | 3.77E-05 | -0.65   | 0.092 | 0.21 | 0.601733 | MS.Trt_vs_MS.NoTrt_B |
| ZMYM6      | 3.78E-05 | 0.49049 | 0.664 | 0.89 | 0.603003 | MS.Trt_vs_MS.NoTrt_B |
| QRICH1     | 3.81E-05 | -0.3363 | 0.407 | 0.6  | 0.607854 | MS.Trt_vs_MS.NoTrt_B |
| BAX        | 3.81E-05 | -0.3281 | 0.248 | 0.4  | 0.608911 | MS.Trt_vs_MS.NoTrt_B |
| ZNF507     | 3.85E-05 | -0.2533 | 0.118 | 0.25 | 0.614453 | MS.Trt_vs_MS.NoTrt_B |
| RP11-977G1 | 3.86E-05 | -0.2552 | 0.044 | 0.14 | 0.616379 | MS.Trt_vs_MS.NoTrt_B |
| AP003419.1 | 3.89E-05 | -0.5089 | 0.098 | 0.22 | 0.621135 | MS.Trt_vs_MS.NoTrt_B |
| FAM105A    | 3.94E-05 | 0.34598 | 0.181 | 0.33 | 0.628629 | MS.Trt_vs_MS.NoTrt_B |
| ZNF226     | 3.94E-05 | -0.7097 | 0.316 | 0.47 | 0.629195 | MS.Trt_vs_MS.NoTrt_B |
| PSMB7      | 3.97E-05 | -0.3357 | 0.198 | 0.35 | 0.63421  | MS.Trt_vs_MS.NoTrt_B |
| RNF130     | 3.97E-05 | 0.6419  | 0.488 | 0.67 | 0.634516 | MS.Trt_vs_MS.NoTrt_B |
| CHST11     | 3.99E-05 | -0.3678 | 0.109 | 0.23 | 0.63773  | MS.Trt_vs_MS.NoTrt_B |
| ZNF85      | 4.00E-05 | -0.4592 | 0.514 | 0.72 | 0.639056 | MS.Trt_vs_MS.NoTrt_B |
| SIVA1      | 4.00E-05 | -0.3077 | 0.303 | 0.47 | 0.639271 | MS.Trt_vs_MS.NoTrt_B |
| HTATIP2    | 4.02E-05 | -0.4241 | 0.087 | 0.21 | 0.6416   | MS.Trt_vs_MS.NoTrt_B |
| TIMM23B    | 4.03E-05 | -0.8321 | 0.46  | 0.68 | 0.644118 | MS.Trt_vs_MS.NoTrt_B |
| C1orf159   | 4.05E-05 | -0.9796 | 0.076 | 0.19 | 0.646534 | MS.Trt_vs_MS.NoTrt_B |
| POLA2      | 4.09E-05 | -0.7945 | 0.534 | 0.7  | 0.652982 | MS.Trt_vs_MS.NoTrt_B |
| SLC12A2    | 4.09E-05 | 0.7141  | 0.412 | 0.63 | 0.654022 | MS.Trt_vs_MS.NoTrt_B |
| BEX2       | 4.15E-05 | -0.7579 | 0.041 | 0.13 | 0.663462 | MS.Trt_vs_MS.NoTrt_B |
| TSEN15     | 4.17E-05 | -0.6113 | 0.107 | 0.23 | 0.666672 | MS.Trt_vs_MS.NoTrt_B |
| ERI1       | 4.19E-05 | 0.35913 | 0.268 | 0.45 | 0.669631 | MS.Trt_vs_MS.NoTrt_B |
| MTR        | 4.21E-05 | -0.287  | 0.414 | 0.56 | 0.671742 | MS.Trt_vs_MS.NoTrt_B |
| ZNF687     | 4.25E-05 | -0.6164 | 0.497 | 0.66 | 0.679601 | MS.Trt_vs_MS.NoTrt_B |
| ZNF335     | 4.36E-05 | -0.3368 | 0.248 | 0.4  | 0.696227 | MS.Trt_vs_MS.NoTrt_B |
| ATP2B1     | 4.38E-05 | 0.48856 | 0.325 | 0.54 | 0.699107 | MS.Trt_vs_MS.NoTrt_B |
| C1orf43    | 4.46E-05 | -0.3596 | 0.451 | 0.62 | 0.71286  | MS.Trt_vs_MS.NoTrt_B |

|           |          |         |       |      |          |                      |
|-----------|----------|---------|-------|------|----------|----------------------|
| VPS26A    | 4.47E-05 | 0.63732 | 0.244 | 0.42 | 0.713716 | MS.Trt_vs_MS.NoTrt_B |
| FAHD2B    | 4.48E-05 | -0.694  | 0.098 | 0.22 | 0.714833 | MS.Trt_vs_MS.NoTrt_B |
| ACOT9     | 4.49E-05 | -0.8023 | 0.8   | 0.9  | 0.71661  | MS.Trt_vs_MS.NoTrt_B |
| ARHGAP11A | 4.53E-05 | -1.0132 | 0.279 | 0.44 | 0.723538 | MS.Trt_vs_MS.NoTrt_B |
| ETF1      | 4.56E-05 | 0.30866 | 0.2   | 0.36 | 0.727615 | MS.Trt_vs_MS.NoTrt_B |
| DDOST     | 4.57E-05 | -0.5817 | 0.444 | 0.57 | 0.730446 | MS.Trt_vs_MS.NoTrt_B |
| CMTR1     | 4.58E-05 | -1.1321 | 0.122 | 0.24 | 0.732327 | MS.Trt_vs_MS.NoTrt_B |
| ONECUT3   | 4.59E-05 | -0.3327 | 0.312 | 0.48 | 0.733245 | MS.Trt_vs_MS.NoTrt_B |
| ASB7      | 4.62E-05 | -1.3188 | 0.033 | 0.11 | 0.738497 | MS.Trt_vs_MS.NoTrt_B |
| ELOF1     | 4.77E-05 | -0.5975 | 0.473 | 0.62 | 0.762699 | MS.Trt_vs_MS.NoTrt_B |
| CCDC141   | 4.84E-05 | -0.3224 | 0.505 | 0.7  | 0.77339  | MS.Trt_vs_MS.NoTrt_B |
| COPS4     | 4.86E-05 | 0.53971 | 0.349 | 0.55 | 0.776267 | MS.Trt_vs_MS.NoTrt_B |
| CTSD      | 4.86E-05 | -0.5412 | 0.139 | 0.28 | 0.776592 | MS.Trt_vs_MS.NoTrt_B |
| KIAA2013  | 4.92E-05 | -0.3852 | 0.209 | 0.36 | 0.785745 | MS.Trt_vs_MS.NoTrt_B |
| PHF7      | 4.93E-05 | -1.1447 | 0.351 | 0.54 | 0.787569 | MS.Trt_vs_MS.NoTrt_B |
| WBSCR22   | 4.95E-05 | -0.4817 | 0.584 | 0.75 | 0.791294 | MS.Trt_vs_MS.NoTrt_B |
| MCOLN2    | 4.96E-05 | 0.34069 | 0.316 | 0.49 | 0.792331 | MS.Trt_vs_MS.NoTrt_B |
| NOL6      | 4.97E-05 | -1.4045 | 0.275 | 0.42 | 0.794654 | MS.Trt_vs_MS.NoTrt_B |
| GALNT10   | 4.99E-05 | -0.6229 | 0.403 | 0.57 | 0.797088 | MS.Trt_vs_MS.NoTrt_B |
| RTN3      | 5.09E-05 | -0.4297 | 0.098 | 0.22 | 0.813735 | MS.Trt_vs_MS.NoTrt_B |
| GABRE     | 5.12E-05 | -0.3915 | 0.133 | 0.26 | 0.817806 | MS.Trt_vs_MS.NoTrt_B |
| SIMC1     | 5.19E-05 | -0.2604 | 0.296 | 0.48 | 0.828983 | MS.Trt_vs_MS.NoTrt_B |
| WDR55     | 5.30E-05 | -0.3324 | 0.484 | 0.67 | 0.846807 | MS.Trt_vs_MS.NoTrt_B |
| SEL1L     | 5.33E-05 | -0.7812 | 0.115 | 0.24 | 0.851888 | MS.Trt_vs_MS.NoTrt_B |
| TRIB1     | 5.34E-05 | -0.3288 | 0.033 | 0.11 | 0.852383 | MS.Trt_vs_MS.NoTrt_B |
| TLDC1     | 5.42E-05 | -0.536  | 0.593 | 0.81 | 0.866054 | MS.Trt_vs_MS.NoTrt_B |
| TSPAN5    | 5.46E-05 | -0.3382 | 0.46  | 0.62 | 0.871823 | MS.Trt_vs_MS.NoTrt_B |
| RCAN3     | 5.48E-05 | 0.25812 | 0.662 | 0.81 | 0.874648 | MS.Trt_vs_MS.NoTrt_B |
| WDR89     | 5.54E-05 | -0.2564 | 0.231 | 0.41 | 0.884475 | MS.Trt_vs_MS.NoTrt_B |
| ZC3H12A   | 5.60E-05 | -1.1958 | 0.057 | 0.15 | 0.894389 | MS.Trt_vs_MS.NoTrt_B |
| C20orf196 | 5.60E-05 | -1.1335 | 0.244 | 0.41 | 0.894729 | MS.Trt_vs_MS.NoTrt_B |
| HYKK      | 5.61E-05 | 0.25191 | 0.684 | 0.86 | 0.895481 | MS.Trt_vs_MS.NoTrt_B |
| MBD3      | 5.63E-05 | 0.42893 | 0.547 | 0.8  | 0.899478 | MS.Trt_vs_MS.NoTrt_B |
| TRMT5     | 5.64E-05 | -1.0639 | 0.089 | 0.2  | 0.90087  | MS.Trt_vs_MS.NoTrt_B |
| NHSL2     | 5.65E-05 | 0.38511 | 0.444 | 0.64 | 0.902273 | MS.Trt_vs_MS.NoTrt_B |
| NUDT2     | 5.68E-05 | -1.3169 | 0.031 | 0.11 | 0.906505 | MS.Trt_vs_MS.NoTrt_B |
| RBMX2     | 5.68E-05 | -0.9851 | 0.052 | 0.15 | 0.908043 | MS.Trt_vs_MS.NoTrt_B |
| MRPL11    | 5.72E-05 | -0.7593 | 0.07  | 0.17 | 0.913241 | MS.Trt_vs_MS.NoTrt_B |
| MAF1      | 5.83E-05 | -0.4039 | 0.122 | 0.25 | 0.931231 | MS.Trt_vs_MS.NoTrt_B |
| MS4A2     | 5.84E-05 | -0.2566 | 0.486 | 0.62 | 0.932981 | MS.Trt_vs_MS.NoTrt_B |

|          |          |         |       |      |          |                      |
|----------|----------|---------|-------|------|----------|----------------------|
| FAN1     | 5.85E-05 | 0.97198 | 0.192 | 0.34 | 0.933773 | MS.Trt_vs_MS.NoTrt_B |
| TNFRSF9  | 5.88E-05 | -0.4609 | 0.754 | 0.91 | 0.939299 | MS.Trt_vs_MS.NoTrt_B |
| RNASEH2C | 5.89E-05 | -0.3155 | 0.072 | 0.18 | 0.940958 | MS.Trt_vs_MS.NoTrt_B |
| HM13     | 5.98E-05 | -0.5029 | 0.715 | 0.83 | 0.955445 | MS.Trt_vs_MS.NoTrt_B |
| ZNF468   | 6.07E-05 | 0.3797  | 0.416 | 0.62 | 0.96963  | MS.Trt_vs_MS.NoTrt_B |
| STX10    | 6.09E-05 | -0.5476 | 0.083 | 0.2  | 0.972763 | MS.Trt_vs_MS.NoTrt_B |
| WEE1     | 6.09E-05 | -0.3158 | 0.51  | 0.65 | 0.972998 | MS.Trt_vs_MS.NoTrt_B |
| ZCCHC9   | 6.16E-05 | -0.4092 | 0.525 | 0.73 | 0.983722 | MS.Trt_vs_MS.NoTrt_B |
| VASP     | 6.17E-05 | -0.7021 | 0.407 | 0.57 | 0.985657 | MS.Trt_vs_MS.NoTrt_B |
| HGS      | 6.18E-05 | 0.30032 | 0.549 | 0.72 | 0.987444 | MS.Trt_vs_MS.NoTrt_B |
| CCDC130  | 6.18E-05 | 0.26865 | 0.316 | 0.49 | 0.987871 | MS.Trt_vs_MS.NoTrt_B |
| XPO6     | 6.20E-05 | -0.3156 | 0.233 | 0.38 | 0.989849 | MS.Trt_vs_MS.NoTrt_B |
| FNDC3A   | 6.20E-05 | -0.2999 | 0.37  | 0.55 | 0.99019  | MS.Trt_vs_MS.NoTrt_B |
| CHD6     | 6.25E-05 | -0.409  | 0.135 | 0.27 | 0.998542 | MS.Trt_vs_MS.NoTrt_B |
| RCHY1    | 6.41E-05 | -0.8131 | 0.192 | 0.34 | 1        | MS.Trt_vs_MS.NoTrt_B |
| RINL     | 6.45E-05 | -0.6398 | 0.597 | 0.76 | 1        | MS.Trt_vs_MS.NoTrt_B |
| CCDC14   | 6.47E-05 | 0.4885  | 0.129 | 0.27 | 1        | MS.Trt_vs_MS.NoTrt_B |
| CLCN3    | 6.49E-05 | 1.0745  | 0.227 | 0.39 | 1        | MS.Trt_vs_MS.NoTrt_B |
| EIF1AD   | 6.51E-05 | 0.54578 | 0.571 | 0.74 | 1        | MS.Trt_vs_MS.NoTrt_B |
| EGLN1    | 6.55E-05 | -0.2654 | 0.24  | 0.4  | 1        | MS.Trt_vs_MS.NoTrt_B |
| RC3H1    | 6.60E-05 | 0.33164 | 0.353 | 0.5  | 1        | MS.Trt_vs_MS.NoTrt_B |
| ZNF621   | 6.61E-05 | -0.2734 | 0.828 | 0.94 | 1        | MS.Trt_vs_MS.NoTrt_B |
| AP5Z1    | 6.62E-05 | -1.0119 | 0.109 | 0.23 | 1        | MS.Trt_vs_MS.NoTrt_B |
| ARNTL2   | 6.67E-05 | -0.3318 | 0.532 | 0.63 | 1        | MS.Trt_vs_MS.NoTrt_B |
| C8orf59  | 6.70E-05 | 0.33163 | 0.283 | 0.45 | 1        | MS.Trt_vs_MS.NoTrt_B |
| MEI1     | 6.73E-05 | -0.6392 | 0.601 | 0.76 | 1        | MS.Trt_vs_MS.NoTrt_B |
| IARS2    | 6.78E-05 | -0.6984 | 0.085 | 0.2  | 1        | MS.Trt_vs_MS.NoTrt_B |
| TCAF1    | 6.81E-05 | -0.9715 | 0.187 | 0.34 | 1        | MS.Trt_vs_MS.NoTrt_B |
| ANAPC7   | 6.81E-05 | -0.3479 | 0.423 | 0.6  | 1        | MS.Trt_vs_MS.NoTrt_B |
| PTPN2    | 6.82E-05 | -0.4611 | 0.858 | 0.98 | 1        | MS.Trt_vs_MS.NoTrt_B |
| UBE2K    | 6.88E-05 | -0.7427 | 0.111 | 0.23 | 1        | MS.Trt_vs_MS.NoTrt_B |
| KIAA1429 | 6.98E-05 | 0.33102 | 0.651 | 0.84 | 1        | MS.Trt_vs_MS.NoTrt_B |
| CNPY2    | 7.00E-05 | -0.4078 | 0.852 | 0.96 | 1        | MS.Trt_vs_MS.NoTrt_B |
| YPEL5    | 7.01E-05 | 0.28082 | 0.144 | 0.28 | 1        | MS.Trt_vs_MS.NoTrt_B |
| RARA     | 7.04E-05 | -0.9172 | 0.037 | 0.12 | 1        | MS.Trt_vs_MS.NoTrt_B |
| ARHGAP19 | 7.05E-05 | 0.37037 | 0.207 | 0.36 | 1        | MS.Trt_vs_MS.NoTrt_B |
| FLYWCH1  | 7.10E-05 | -0.4672 | 0.575 | 0.79 | 1        | MS.Trt_vs_MS.NoTrt_B |
| RASSF1   | 7.11E-05 | -0.9732 | 0.109 | 0.22 | 1        | MS.Trt_vs_MS.NoTrt_B |
| HSDL2    | 7.17E-05 | -0.4857 | 0.087 | 0.2  | 1        | MS.Trt_vs_MS.NoTrt_B |
| GRAP2    | 7.17E-05 | -0.5246 | 0.209 | 0.35 | 1        | MS.Trt_vs_MS.NoTrt_B |

|             |          |         |       |      |                        |
|-------------|----------|---------|-------|------|------------------------|
| REEP4       | 7.17E-05 | -1.51   | 0.028 | 0.1  | 1 MS.Trt_vs_MS.NoTrt_B |
| FAM153A     | 7.28E-05 | -0.4554 | 0.373 | 0.54 | 1 MS.Trt_vs_MS.NoTrt_B |
| HSBP1L1     | 7.33E-05 | -0.319  | 0.251 | 0.41 | 1 MS.Trt_vs_MS.NoTrt_B |
| SMURF2      | 7.36E-05 | 0.31091 | 0.586 | 0.77 | 1 MS.Trt_vs_MS.NoTrt_B |
| UXT         | 7.44E-05 | -0.3357 | 0.157 | 0.3  | 1 MS.Trt_vs_MS.NoTrt_B |
| PRPF31      | 7.51E-05 | -0.711  | 0.096 | 0.21 | 1 MS.Trt_vs_MS.NoTrt_B |
| AKT1S1      | 7.58E-05 | -0.571  | 0.129 | 0.25 | 1 MS.Trt_vs_MS.NoTrt_B |
| NAGPA       | 7.59E-05 | -0.2978 | 0.505 | 0.7  | 1 MS.Trt_vs_MS.NoTrt_B |
| SV2C        | 7.60E-05 | -0.7581 | 0.444 | 0.66 | 1 MS.Trt_vs_MS.NoTrt_B |
| BCL2L1      | 7.61E-05 | -0.6013 | 0.096 | 0.21 | 1 MS.Trt_vs_MS.NoTrt_B |
| GORASP2     | 7.64E-05 | -0.487  | 0.129 | 0.25 | 1 MS.Trt_vs_MS.NoTrt_B |
| APEH        | 7.71E-05 | -0.3822 | 0.133 | 0.27 | 1 MS.Trt_vs_MS.NoTrt_B |
| AFF1        | 7.75E-05 | 0.47566 | 0.279 | 0.46 | 1 MS.Trt_vs_MS.NoTrt_B |
| POLR2L      | 7.75E-05 | -0.2969 | 0.179 | 0.32 | 1 MS.Trt_vs_MS.NoTrt_B |
| KBTBD6      | 7.88E-05 | -1.4414 | 0.253 | 0.43 | 1 MS.Trt_vs_MS.NoTrt_B |
| FNTA        | 7.91E-05 | 0.58284 | 0.695 | 0.84 | 1 MS.Trt_vs_MS.NoTrt_B |
| GLCE        | 7.94E-05 | -0.9136 | 0.074 | 0.18 | 1 MS.Trt_vs_MS.NoTrt_B |
| RP11-435I1C | 7.94E-05 | -0.2844 | 0.24  | 0.39 | 1 MS.Trt_vs_MS.NoTrt_B |
| SGSM3       | 7.98E-05 | -0.438  | 0.131 | 0.26 | 1 MS.Trt_vs_MS.NoTrt_B |
| ACTR3B      | 8.09E-05 | -0.5801 | 0.377 | 0.55 | 1 MS.Trt_vs_MS.NoTrt_B |
| MCCC2       | 8.18E-05 | 0.42178 | 0.473 | 0.67 | 1 MS.Trt_vs_MS.NoTrt_B |
| CCDC155     | 8.20E-05 | -0.5684 | 0.059 | 0.16 | 1 MS.Trt_vs_MS.NoTrt_B |
| SREBF2      | 8.28E-05 | -0.5427 | 0.085 | 0.2  | 1 MS.Trt_vs_MS.NoTrt_B |
| GOSR2       | 8.34E-05 | -0.9526 | 0.068 | 0.17 | 1 MS.Trt_vs_MS.NoTrt_B |
| CALM2       | 8.35E-05 | 0.27316 | 0.78  | 0.9  | 1 MS.Trt_vs_MS.NoTrt_B |
| SMARCA4     | 8.48E-05 | 0.53151 | 0.664 | 0.81 | 1 MS.Trt_vs_MS.NoTrt_B |
| RPN1        | 8.53E-05 | -0.3454 | 0.527 | 0.68 | 1 MS.Trt_vs_MS.NoTrt_B |
| PI4KB       | 8.55E-05 | -0.6618 | 0.122 | 0.24 | 1 MS.Trt_vs_MS.NoTrt_B |
| VPS4A       | 8.56E-05 | -0.265  | 0.499 | 0.67 | 1 MS.Trt_vs_MS.NoTrt_B |
| DDB1        | 8.64E-05 | -0.5385 | 0.756 | 0.89 | 1 MS.Trt_vs_MS.NoTrt_B |
| GPN3        | 8.81E-05 | -1.2357 | 0.268 | 0.42 | 1 MS.Trt_vs_MS.NoTrt_B |
| FAM63B      | 8.84E-05 | -0.7426 | 0.623 | 0.8  | 1 MS.Trt_vs_MS.NoTrt_B |
| WHSC1L1     | 8.87E-05 | 0.26738 | 0.477 | 0.69 | 1 MS.Trt_vs_MS.NoTrt_B |
| IMMP1L      | 8.92E-05 | 0.86892 | 0.405 | 0.58 | 1 MS.Trt_vs_MS.NoTrt_B |
| MYDGF       | 8.93E-05 | -0.2762 | 0.1   | 0.22 | 1 MS.Trt_vs_MS.NoTrt_B |
| NUB1        | 9.14E-05 | -0.3243 | 0.778 | 0.91 | 1 MS.Trt_vs_MS.NoTrt_B |
| RAB3IP      | 9.25E-05 | 0.84011 | 0.51  | 0.67 | 1 MS.Trt_vs_MS.NoTrt_B |
| PHKB        | 9.47E-05 | 0.37711 | 0.623 | 0.81 | 1 MS.Trt_vs_MS.NoTrt_B |
| NFKBIA      | 9.47E-05 | -0.4282 | 0.183 | 0.32 | 1 MS.Trt_vs_MS.NoTrt_B |
| MRPL2       | 9.53E-05 | 0.36727 | 0.183 | 0.34 | 1 MS.Trt_vs_MS.NoTrt_B |

|          |          |         |       |      |                        |
|----------|----------|---------|-------|------|------------------------|
| NSMAF    | 9.61E-05 | -0.4023 | 0.137 | 0.27 | 1 MS.Trt_vs_MS.NoTrt_B |
| RAD23B   | 9.64E-05 | -0.4042 | 0.344 | 0.53 | 1 MS.Trt_vs_MS.NoTrt_B |
| RUVBL2   | 9.66E-05 | -0.3749 | 0.723 | 0.92 | 1 MS.Trt_vs_MS.NoTrt_B |
| RAB11B   | 9.76E-05 | -0.2843 | 0.322 | 0.47 | 1 MS.Trt_vs_MS.NoTrt_B |
| POLL     | 9.76E-05 | -1.1229 | 0.283 | 0.42 | 1 MS.Trt_vs_MS.NoTrt_B |
| TTC12    | 9.87E-05 | -0.9141 | 0.076 | 0.18 | 1 MS.Trt_vs_MS.NoTrt_B |
| SLC25A15 | 9.88E-05 | -0.4861 | 0.532 | 0.72 | 1 MS.Trt_vs_MS.NoTrt_B |
| FLT4     | 1.00E-04 | -0.9087 | 0.05  | 0.14 | 1 MS.Trt_vs_MS.NoTrt_B |
| ZNF880   | 1.02E-04 | 0.40494 | 0.373 | 0.55 | 1 MS.Trt_vs_MS.NoTrt_B |
| ZNF45    | 1.03E-04 | 0.95538 | 0.19  | 0.34 | 1 MS.Trt_vs_MS.NoTrt_B |
| SLC25A20 | 1.04E-04 | -1.9575 | 0.048 | 0.14 | 1 MS.Trt_vs_MS.NoTrt_B |
| PCNX1    | 1.04E-04 | 0.35873 | 0.715 | 0.88 | 1 MS.Trt_vs_MS.NoTrt_B |
| DYNC1I2  | 1.04E-04 | -0.8045 | 0.135 | 0.26 | 1 MS.Trt_vs_MS.NoTrt_B |
| ZBTB7A   | 1.05E-04 | -0.4876 | 0.072 | 0.17 | 1 MS.Trt_vs_MS.NoTrt_B |
| CES3     | 1.07E-04 | -0.2729 | 0.139 | 0.27 | 1 MS.Trt_vs_MS.NoTrt_B |
| TMEM184A | 1.08E-04 | 0.62644 | 0.27  | 0.43 | 1 MS.Trt_vs_MS.NoTrt_B |
| CXXC1    | 1.09E-04 | -0.6895 | 0.105 | 0.22 | 1 MS.Trt_vs_MS.NoTrt_B |
| C1orf27  | 1.10E-04 | -0.9465 | 0.083 | 0.19 | 1 MS.Trt_vs_MS.NoTrt_B |
| SREK1IP1 | 1.10E-04 | -0.4211 | 0.285 | 0.45 | 1 MS.Trt_vs_MS.NoTrt_B |
| ZDHHC3   | 1.10E-04 | -0.3844 | 0.338 | 0.48 | 1 MS.Trt_vs_MS.NoTrt_B |
| C12orf57 | 1.11E-04 | -0.3492 | 0.296 | 0.45 | 1 MS.Trt_vs_MS.NoTrt_B |
| TMEM243  | 1.11E-04 | 0.39149 | 0.198 | 0.36 | 1 MS.Trt_vs_MS.NoTrt_B |
| RFX5     | 1.11E-04 | -0.4418 | 0.216 | 0.35 | 1 MS.Trt_vs_MS.NoTrt_B |
| GSPT1    | 1.13E-04 | 0.30335 | 0.386 | 0.56 | 1 MS.Trt_vs_MS.NoTrt_B |
| BZW2     | 1.13E-04 | -0.6639 | 0.083 | 0.19 | 1 MS.Trt_vs_MS.NoTrt_B |
| GNAL     | 1.14E-04 | 0.44626 | 0.318 | 0.48 | 1 MS.Trt_vs_MS.NoTrt_B |
| HMGA1    | 1.15E-04 | -0.3195 | 0.142 | 0.27 | 1 MS.Trt_vs_MS.NoTrt_B |
| FBXL4    | 1.16E-04 | -0.574  | 0.386 | 0.55 | 1 MS.Trt_vs_MS.NoTrt_B |
| SYAP1    | 1.16E-04 | 0.34969 | 0.887 | 0.98 | 1 MS.Trt_vs_MS.NoTrt_B |
| ST8SIA3  | 1.16E-04 | -0.3209 | 0.107 | 0.22 | 1 MS.Trt_vs_MS.NoTrt_B |
| LAPTM4A  | 1.17E-04 | -0.27   | 0.098 | 0.21 | 1 MS.Trt_vs_MS.NoTrt_B |
| ZNF675   | 1.17E-04 | 0.87316 | 0.795 | 0.92 | 1 MS.Trt_vs_MS.NoTrt_B |
| MAP2K2   | 1.19E-04 | 0.2753  | 0.547 | 0.72 | 1 MS.Trt_vs_MS.NoTrt_B |
| ASAH1    | 1.20E-04 | -0.31   | 0.595 | 0.76 | 1 MS.Trt_vs_MS.NoTrt_B |
| SMARCE1  | 1.20E-04 | 0.47236 | 0.373 | 0.55 | 1 MS.Trt_vs_MS.NoTrt_B |
| BFAR     | 1.20E-04 | -0.9003 | 0.431 | 0.58 | 1 MS.Trt_vs_MS.NoTrt_B |
| SPATA20  | 1.20E-04 | -0.4657 | 0.048 | 0.14 | 1 MS.Trt_vs_MS.NoTrt_B |
| VPS13D   | 1.21E-04 | 0.44909 | 0.187 | 0.34 | 1 MS.Trt_vs_MS.NoTrt_B |
| SRSF6    | 1.21E-04 | 0.56602 | 0.597 | 0.75 | 1 MS.Trt_vs_MS.NoTrt_B |
| FMR1     | 1.21E-04 | -0.4519 | 0.063 | 0.16 | 1 MS.Trt_vs_MS.NoTrt_B |

|          |          |         |       |      |   |                      |
|----------|----------|---------|-------|------|---|----------------------|
| CLTA     | 1.22E-04 | -0.6571 | 0.499 | 0.64 | 1 | MS.Trt_vs_MS.NoTrt_B |
| KPNA6    | 1.23E-04 | 0.33003 | 0.399 | 0.6  | 1 | MS.Trt_vs_MS.NoTrt_B |
| PTCD2    | 1.23E-04 | 0.63103 | 0.388 | 0.61 | 1 | MS.Trt_vs_MS.NoTrt_B |
| SSB      | 1.23E-04 | 0.51471 | 0.641 | 0.81 | 1 | MS.Trt_vs_MS.NoTrt_B |
| QRSL1    | 1.24E-04 | 0.99242 | 0.407 | 0.6  | 1 | MS.Trt_vs_MS.NoTrt_B |
| CREG1    | 1.25E-04 | -0.2972 | 0.19  | 0.34 | 1 | MS.Trt_vs_MS.NoTrt_B |
| EPPIN    | 1.26E-04 | 0.42415 | 0.277 | 0.47 | 1 | MS.Trt_vs_MS.NoTrt_B |
| SUPT5H   | 1.27E-04 | -0.274  | 0.316 | 0.48 | 1 | MS.Trt_vs_MS.NoTrt_B |
| KAT6A    | 1.27E-04 | -0.4704 | 0.614 | 0.82 | 1 | MS.Trt_vs_MS.NoTrt_B |
| ZNF587   | 1.28E-04 | 0.40264 | 0.837 | 0.95 | 1 | MS.Trt_vs_MS.NoTrt_B |
| CAPS2    | 1.28E-04 | -0.3539 | 0.288 | 0.46 | 1 | MS.Trt_vs_MS.NoTrt_B |
| TRIM16   | 1.28E-04 | -0.9621 | 0.353 | 0.48 | 1 | MS.Trt_vs_MS.NoTrt_B |
| POU5F2   | 1.28E-04 | 0.38682 | 0.512 | 0.68 | 1 | MS.Trt_vs_MS.NoTrt_B |
| HAUS1    | 1.29E-04 | -0.7993 | 0.455 | 0.62 | 1 | MS.Trt_vs_MS.NoTrt_B |
| GPN2     | 1.29E-04 | -0.3038 | 0.651 | 0.76 | 1 | MS.Trt_vs_MS.NoTrt_B |
| ALDH16A1 | 1.29E-04 | -0.297  | 0.516 | 0.71 | 1 | MS.Trt_vs_MS.NoTrt_B |
| SDE2     | 1.29E-04 | -0.2748 | 0.534 | 0.71 | 1 | MS.Trt_vs_MS.NoTrt_B |
| SYS1     | 1.29E-04 | -0.5987 | 0.351 | 0.52 | 1 | MS.Trt_vs_MS.NoTrt_B |
| ENTPD3   | 1.30E-04 | -0.34   | 0.242 | 0.4  | 1 | MS.Trt_vs_MS.NoTrt_B |
| STRBP    | 1.32E-04 | -1.0736 | 0.449 | 0.61 | 1 | MS.Trt_vs_MS.NoTrt_B |
| ALKBH2   | 1.33E-04 | -0.8524 | 0.24  | 0.39 | 1 | MS.Trt_vs_MS.NoTrt_B |
| CTNS     | 1.34E-04 | -1.422  | 0.083 | 0.18 | 1 | MS.Trt_vs_MS.NoTrt_B |
| SULT1A2  | 1.34E-04 | -0.3446 | 0.129 | 0.25 | 1 | MS.Trt_vs_MS.NoTrt_B |
| ITGA10   | 1.34E-04 | 0.46815 | 0.344 | 0.54 | 1 | MS.Trt_vs_MS.NoTrt_B |
| ELMO2    | 1.35E-04 | -0.6792 | 0.144 | 0.27 | 1 | MS.Trt_vs_MS.NoTrt_B |
| TMEM35B  | 1.35E-04 | -0.2744 | 0.109 | 0.23 | 1 | MS.Trt_vs_MS.NoTrt_B |
| MPPE1    | 1.37E-04 | -0.4954 | 0.776 | 0.87 | 1 | MS.Trt_vs_MS.NoTrt_B |
| PLEKHB2  | 1.37E-04 | -0.4983 | 0.732 | 0.87 | 1 | MS.Trt_vs_MS.NoTrt_B |
| PMM2     | 1.38E-04 | -0.3066 | 0.573 | 0.73 | 1 | MS.Trt_vs_MS.NoTrt_B |
| TMEM169  | 1.38E-04 | -0.5305 | 0.412 | 0.6  | 1 | MS.Trt_vs_MS.NoTrt_B |
| C12orf40 | 1.38E-04 | -0.4062 | 0.163 | 0.3  | 1 | MS.Trt_vs_MS.NoTrt_B |
| VCPIP1   | 1.40E-04 | 0.39679 | 0.242 | 0.41 | 1 | MS.Trt_vs_MS.NoTrt_B |
| GIGYF2   | 1.41E-04 | -0.2546 | 0.797 | 0.92 | 1 | MS.Trt_vs_MS.NoTrt_B |
| NDC80    | 1.41E-04 | -0.7288 | 0.521 | 0.7  | 1 | MS.Trt_vs_MS.NoTrt_B |
| STX12    | 1.42E-04 | -0.5402 | 0.161 | 0.29 | 1 | MS.Trt_vs_MS.NoTrt_B |
| RNF207   | 1.45E-04 | -0.8256 | 0.505 | 0.73 | 1 | MS.Trt_vs_MS.NoTrt_B |
| ASNSD1   | 1.46E-04 | -0.5608 | 0.081 | 0.18 | 1 | MS.Trt_vs_MS.NoTrt_B |
| PHF20    | 1.46E-04 | 0.6935  | 0.381 | 0.56 | 1 | MS.Trt_vs_MS.NoTrt_B |
| KCNA3    | 1.49E-04 | -0.491  | 0.122 | 0.24 | 1 | MS.Trt_vs_MS.NoTrt_B |
| PSMB2    | 1.50E-04 | -0.4427 | 0.603 | 0.77 | 1 | MS.Trt_vs_MS.NoTrt_B |

|            |          |         |       |      |   |                      |
|------------|----------|---------|-------|------|---|----------------------|
| HLA-DRB1   | 1.51E-04 | -0.7169 | 0.168 | 0.29 | 1 | MS.Trt_vs_MS.NoTrt_B |
| HARS2      | 1.51E-04 | -0.3108 | 0.102 | 0.22 | 1 | MS.Trt_vs_MS.NoTrt_B |
| YIPF1      | 1.51E-04 | -0.3293 | 0.039 | 0.12 | 1 | MS.Trt_vs_MS.NoTrt_B |
| POLR2C     | 1.51E-04 | -0.5877 | 0.466 | 0.63 | 1 | MS.Trt_vs_MS.NoTrt_B |
| ZNF134     | 1.53E-04 | 0.53452 | 0.126 | 0.25 | 1 | MS.Trt_vs_MS.NoTrt_B |
| RP3-461F17 | 1.53E-04 | -0.2709 | 0.139 | 0.26 | 1 | MS.Trt_vs_MS.NoTrt_B |
| ZNF511     | 1.54E-04 | -1.0092 | 0.039 | 0.12 | 1 | MS.Trt_vs_MS.NoTrt_B |
| MIEN1      | 1.54E-04 | -0.3452 | 0.076 | 0.18 | 1 | MS.Trt_vs_MS.NoTrt_B |
| GCC2       | 1.54E-04 | 0.32542 | 0.636 | 0.83 | 1 | MS.Trt_vs_MS.NoTrt_B |
| TUSC3      | 1.56E-04 | -0.2723 | 0.292 | 0.43 | 1 | MS.Trt_vs_MS.NoTrt_B |
| ST7        | 1.57E-04 | -0.8246 | 0.031 | 0.1  | 1 | MS.Trt_vs_MS.NoTrt_B |
| TERF2IP    | 1.58E-04 | -0.4802 | 0.255 | 0.4  | 1 | MS.Trt_vs_MS.NoTrt_B |
| CEP170     | 1.58E-04 | 0.59115 | 0.442 | 0.63 | 1 | MS.Trt_vs_MS.NoTrt_B |
| TRIM59     | 1.58E-04 | 0.2944  | 0.747 | 0.91 | 1 | MS.Trt_vs_MS.NoTrt_B |
| CMTM3      | 1.58E-04 | -0.4135 | 0.098 | 0.21 | 1 | MS.Trt_vs_MS.NoTrt_B |
| FOXO3      | 1.59E-04 | -0.7582 | 0.292 | 0.43 | 1 | MS.Trt_vs_MS.NoTrt_B |
| RCC1       | 1.61E-04 | -0.6662 | 0.109 | 0.23 | 1 | MS.Trt_vs_MS.NoTrt_B |
| MMAB       | 1.61E-04 | 0.66416 | 0.473 | 0.67 | 1 | MS.Trt_vs_MS.NoTrt_B |
| RPS10      | 1.62E-04 | -0.5935 | 0.046 | 0.13 | 1 | MS.Trt_vs_MS.NoTrt_B |
| MUTYH      | 1.63E-04 | -0.3844 | 0.425 | 0.58 | 1 | MS.Trt_vs_MS.NoTrt_B |
| H2AFJ      | 1.63E-04 | -0.7574 | 0.076 | 0.17 | 1 | MS.Trt_vs_MS.NoTrt_B |
| NAA16      | 1.64E-04 | 0.28413 | 0.272 | 0.43 | 1 | MS.Trt_vs_MS.NoTrt_B |
| SUB1       | 1.67E-04 | 0.38681 | 0.447 | 0.65 | 1 | MS.Trt_vs_MS.NoTrt_B |
| SNX2       | 1.67E-04 | -0.2678 | 0.473 | 0.62 | 1 | MS.Trt_vs_MS.NoTrt_B |
| RABL2A     | 1.67E-04 | -0.4257 | 0.418 | 0.56 | 1 | MS.Trt_vs_MS.NoTrt_B |
| MSI2       | 1.68E-04 | 0.28626 | 0.719 | 0.85 | 1 | MS.Trt_vs_MS.NoTrt_B |
| STAT1      | 1.69E-04 | -0.2701 | 0.349 | 0.5  | 1 | MS.Trt_vs_MS.NoTrt_B |
| SMPD3      | 1.70E-04 | -0.6462 | 0.532 | 0.76 | 1 | MS.Trt_vs_MS.NoTrt_B |
| SUV39H2    | 1.70E-04 | -0.4065 | 0.309 | 0.48 | 1 | MS.Trt_vs_MS.NoTrt_B |
| AREL1      | 1.71E-04 | -0.551  | 0.349 | 0.51 | 1 | MS.Trt_vs_MS.NoTrt_B |
| DSTYK      | 1.72E-04 | -0.9073 | 0.656 | 0.85 | 1 | MS.Trt_vs_MS.NoTrt_B |
| PAM        | 1.72E-04 | -0.9612 | 0.216 | 0.35 | 1 | MS.Trt_vs_MS.NoTrt_B |
| NDUFA13    | 1.75E-04 | 0.29314 | 0.412 | 0.62 | 1 | MS.Trt_vs_MS.NoTrt_B |
| ERCC3      | 1.75E-04 | -0.2776 | 0.288 | 0.43 | 1 | MS.Trt_vs_MS.NoTrt_B |
| TEP1       | 1.78E-04 | 0.40629 | 0.305 | 0.49 | 1 | MS.Trt_vs_MS.NoTrt_B |
| FAM216B    | 1.78E-04 | -0.2794 | 0.115 | 0.23 | 1 | MS.Trt_vs_MS.NoTrt_B |
| SNAP47     | 1.79E-04 | -1.0824 | 0.076 | 0.17 | 1 | MS.Trt_vs_MS.NoTrt_B |
| MTHFSD     | 1.79E-04 | -1.2298 | 0.037 | 0.11 | 1 | MS.Trt_vs_MS.NoTrt_B |
| LSM3       | 1.80E-04 | 0.32269 | 0.423 | 0.6  | 1 | MS.Trt_vs_MS.NoTrt_B |
| HNRNPDL    | 1.81E-04 | 0.25902 | 0.495 | 0.71 | 1 | MS.Trt_vs_MS.NoTrt_B |



|            |          |         |       |      |   |                      |
|------------|----------|---------|-------|------|---|----------------------|
| NARS       | 1.85E-04 | -0.4014 | 0.118 | 0.23 | 1 | MS.Trt_vs_MS.NoTrt_B |
| LUZP1      | 1.86E-04 | -0.3228 | 0.344 | 0.49 | 1 | MS.Trt_vs_MS.NoTrt_B |
| C2orf74    | 1.88E-04 | -0.2929 | 0.32  | 0.5  | 1 | MS.Trt_vs_MS.NoTrt_B |
| IRF1       | 1.89E-04 | -0.386  | 0.791 | 0.93 | 1 | MS.Trt_vs_MS.NoTrt_B |
| LATS1      | 1.90E-04 | 0.33706 | 0.525 | 0.74 | 1 | MS.Trt_vs_MS.NoTrt_B |
| TBC1D9B    | 1.92E-04 | -0.8392 | 0.351 | 0.51 | 1 | MS.Trt_vs_MS.NoTrt_B |
| SPAG4      | 1.92E-04 | -0.2594 | 0.163 | 0.3  | 1 | MS.Trt_vs_MS.NoTrt_B |
| SIK2       | 1.93E-04 | -0.2615 | 0.527 | 0.68 | 1 | MS.Trt_vs_MS.NoTrt_B |
| NSMCE2     | 1.94E-04 | -0.4107 | 0.414 | 0.61 | 1 | MS.Trt_vs_MS.NoTrt_B |
| SLC30A9    | 1.94E-04 | -0.4363 | 0.386 | 0.53 | 1 | MS.Trt_vs_MS.NoTrt_B |
| PTBP2      | 1.94E-04 | 0.65918 | 0.471 | 0.65 | 1 | MS.Trt_vs_MS.NoTrt_B |
| SAP30BP    | 1.94E-04 | -0.5285 | 0.163 | 0.29 | 1 | MS.Trt_vs_MS.NoTrt_B |
| MAPK1IP1L  | 1.95E-04 | 0.3952  | 0.684 | 0.87 | 1 | MS.Trt_vs_MS.NoTrt_B |
| ULBP3      | 1.95E-04 | -0.44   | 0.405 | 0.59 | 1 | MS.Trt_vs_MS.NoTrt_B |
| ACAN       | 1.95E-04 | -0.5221 | 0.192 | 0.34 | 1 | MS.Trt_vs_MS.NoTrt_B |
| ANKRD36C   | 1.96E-04 | 0.42511 | 0.477 | 0.65 | 1 | MS.Trt_vs_MS.NoTrt_B |
| ACYP2      | 1.98E-04 | -0.3732 | 0.466 | 0.61 | 1 | MS.Trt_vs_MS.NoTrt_B |
| TNKS       | 1.99E-04 | -0.3426 | 0.66  | 0.82 | 1 | MS.Trt_vs_MS.NoTrt_B |
| SPTSSA     | 1.99E-04 | -0.3504 | 0.244 | 0.39 | 1 | MS.Trt_vs_MS.NoTrt_B |
| PPIL2      | 1.99E-04 | -0.6443 | 0.257 | 0.4  | 1 | MS.Trt_vs_MS.NoTrt_B |
| RARS2      | 2.00E-04 | -0.4864 | 0.453 | 0.62 | 1 | MS.Trt_vs_MS.NoTrt_B |
| SLC20A1    | 2.00E-04 | -0.7844 | 0.107 | 0.22 | 1 | MS.Trt_vs_MS.NoTrt_B |
| HDHD3      | 2.02E-04 | -0.5933 | 0.115 | 0.23 | 1 | MS.Trt_vs_MS.NoTrt_B |
| STK16      | 2.03E-04 | -1.6114 | 0.035 | 0.11 | 1 | MS.Trt_vs_MS.NoTrt_B |
| INTS1      | 2.03E-04 | -0.7476 | 0.24  | 0.37 | 1 | MS.Trt_vs_MS.NoTrt_B |
| KLRG1      | 2.03E-04 | 0.48454 | 0.246 | 0.42 | 1 | MS.Trt_vs_MS.NoTrt_B |
| TSSC1      | 2.04E-04 | -0.5917 | 0.068 | 0.16 | 1 | MS.Trt_vs_MS.NoTrt_B |
| C1orf131   | 2.05E-04 | -0.2882 | 0.488 | 0.67 | 1 | MS.Trt_vs_MS.NoTrt_B |
| C21orf59   | 2.05E-04 | -0.509  | 0.283 | 0.42 | 1 | MS.Trt_vs_MS.NoTrt_B |
| ACOX3      | 2.05E-04 | -1.8325 | 0.041 | 0.12 | 1 | MS.Trt_vs_MS.NoTrt_B |
| UPK3B      | 2.08E-04 | -0.2827 | 0.065 | 0.16 | 1 | MS.Trt_vs_MS.NoTrt_B |
| PMVK       | 2.08E-04 | -0.5064 | 0.074 | 0.17 | 1 | MS.Trt_vs_MS.NoTrt_B |
| ACSL5      | 2.09E-04 | -0.3493 | 0.098 | 0.21 | 1 | MS.Trt_vs_MS.NoTrt_B |
| WDR3       | 2.09E-04 | 0.34163 | 0.56  | 0.73 | 1 | MS.Trt_vs_MS.NoTrt_B |
| DNAJB14    | 2.11E-04 | 0.33428 | 0.375 | 0.52 | 1 | MS.Trt_vs_MS.NoTrt_B |
| CCDC28A    | 2.13E-04 | -0.2955 | 0.135 | 0.25 | 1 | MS.Trt_vs_MS.NoTrt_B |
| RTCB       | 2.13E-04 | -0.4811 | 0.109 | 0.22 | 1 | MS.Trt_vs_MS.NoTrt_B |
| ZNF555     | 2.14E-04 | 0.95589 | 0.438 | 0.61 | 1 | MS.Trt_vs_MS.NoTrt_B |
| LA16c-431H | 2.15E-04 | -0.366  | 0.416 | 0.57 | 1 | MS.Trt_vs_MS.NoTrt_B |
| PIGQ       | 2.15E-04 | -0.7694 | 0.309 | 0.44 | 1 | MS.Trt_vs_MS.NoTrt_B |

|          |          |         |       |      |   |                      |
|----------|----------|---------|-------|------|---|----------------------|
| CDK5RAP1 | 2.16E-04 | -0.6052 | 0.246 | 0.4  | 1 | MS.Trt_vs_MS.NoTrt_B |
| CHDH     | 2.17E-04 | -0.486  | 0.366 | 0.51 | 1 | MS.Trt_vs_MS.NoTrt_B |
| CNIH4    | 2.18E-04 | 0.72241 | 0.423 | 0.62 | 1 | MS.Trt_vs_MS.NoTrt_B |
| EEF2KMT  | 2.19E-04 | -1.0011 | 0.041 | 0.12 | 1 | MS.Trt_vs_MS.NoTrt_B |
| GGNBP2   | 2.20E-04 | 0.47041 | 0.595 | 0.76 | 1 | MS.Trt_vs_MS.NoTrt_B |
| ANTXR2   | 2.20E-04 | -0.4906 | 0.553 | 0.67 | 1 | MS.Trt_vs_MS.NoTrt_B |
| SLC35F6  | 2.21E-04 | -0.3233 | 0.632 | 0.81 | 1 | MS.Trt_vs_MS.NoTrt_B |
| FBL      | 2.21E-04 | -0.4071 | 0.342 | 0.5  | 1 | MS.Trt_vs_MS.NoTrt_B |
| ERO1A    | 2.22E-04 | 0.34905 | 0.786 | 0.92 | 1 | MS.Trt_vs_MS.NoTrt_B |
| HNRNPH2  | 2.23E-04 | -0.6113 | 0.129 | 0.24 | 1 | MS.Trt_vs_MS.NoTrt_B |
| VAPB     | 2.23E-04 | -0.4491 | 0.148 | 0.27 | 1 | MS.Trt_vs_MS.NoTrt_B |
| PDCL     | 2.24E-04 | -0.4655 | 0.29  | 0.44 | 1 | MS.Trt_vs_MS.NoTrt_B |
| LPXN     | 2.25E-04 | -0.4935 | 0.279 | 0.41 | 1 | MS.Trt_vs_MS.NoTrt_B |
| TRDMT1   | 2.25E-04 | 0.3446  | 0.538 | 0.74 | 1 | MS.Trt_vs_MS.NoTrt_B |
| MAP3K14  | 2.26E-04 | -0.4541 | 0.113 | 0.23 | 1 | MS.Trt_vs_MS.NoTrt_B |
| BCKDHB   | 2.26E-04 | 0.68991 | 0.479 | 0.65 | 1 | MS.Trt_vs_MS.NoTrt_B |
| EREG     | 2.26E-04 | 0.93321 | 0.599 | 0.78 | 1 | MS.Trt_vs_MS.NoTrt_B |
| TCTA     | 2.27E-04 | -0.4839 | 0.434 | 0.61 | 1 | MS.Trt_vs_MS.NoTrt_B |
| AARS2    | 2.30E-04 | -1.525  | 0.275 | 0.42 | 1 | MS.Trt_vs_MS.NoTrt_B |
| TTC39C   | 2.31E-04 | 0.30475 | 0.756 | 0.9  | 1 | MS.Trt_vs_MS.NoTrt_B |
| KLHDC3   | 2.33E-04 | -0.5304 | 0.105 | 0.22 | 1 | MS.Trt_vs_MS.NoTrt_B |
| TMEM241  | 2.33E-04 | -0.6663 | 0.479 | 0.67 | 1 | MS.Trt_vs_MS.NoTrt_B |
| DDX23    | 2.34E-04 | -0.537  | 0.519 | 0.68 | 1 | MS.Trt_vs_MS.NoTrt_B |
| CRY1     | 2.35E-04 | -0.6959 | 0.081 | 0.18 | 1 | MS.Trt_vs_MS.NoTrt_B |
| ZFAND3   | 2.36E-04 | -0.5333 | 0.503 | 0.67 | 1 | MS.Trt_vs_MS.NoTrt_B |
| STARD7   | 2.37E-04 | -0.5403 | 0.425 | 0.58 | 1 | MS.Trt_vs_MS.NoTrt_B |
| ICK      | 2.38E-04 | 0.86509 | 0.142 | 0.27 | 1 | MS.Trt_vs_MS.NoTrt_B |
| PTBP1    | 2.39E-04 | -0.434  | 0.163 | 0.29 | 1 | MS.Trt_vs_MS.NoTrt_B |
| UQCR10   | 2.40E-04 | 0.49709 | 0.279 | 0.45 | 1 | MS.Trt_vs_MS.NoTrt_B |
| ZNF91    | 2.40E-04 | 0.53243 | 0.643 | 0.79 | 1 | MS.Trt_vs_MS.NoTrt_B |
| DHRS12   | 2.43E-04 | -0.2753 | 0.061 | 0.15 | 1 | MS.Trt_vs_MS.NoTrt_B |
| ZFP64    | 2.43E-04 | -0.5818 | 0.46  | 0.62 | 1 | MS.Trt_vs_MS.NoTrt_B |
| SNX8     | 2.45E-04 | 0.63902 | 0.063 | 0.16 | 1 | MS.Trt_vs_MS.NoTrt_B |
| SNRPG    | 2.45E-04 | 0.56464 | 0.2   | 0.36 | 1 | MS.Trt_vs_MS.NoTrt_B |
| TNFRSF18 | 2.46E-04 | -0.7741 | 0.041 | 0.12 | 1 | MS.Trt_vs_MS.NoTrt_B |
| NARF     | 2.47E-04 | -0.5907 | 0.871 | 0.97 | 1 | MS.Trt_vs_MS.NoTrt_B |
| FAM219B  | 2.47E-04 | -0.55   | 0.349 | 0.52 | 1 | MS.Trt_vs_MS.NoTrt_B |
| PCNP     | 2.47E-04 | 0.71591 | 0.2   | 0.35 | 1 | MS.Trt_vs_MS.NoTrt_B |
| RRAGC    | 2.48E-04 | -0.272  | 0.386 | 0.58 | 1 | MS.Trt_vs_MS.NoTrt_B |
| TMEM161A | 2.48E-04 | -0.8716 | 0.107 | 0.22 | 1 | MS.Trt_vs_MS.NoTrt_B |

|          |          |         |       |      |                        |
|----------|----------|---------|-------|------|------------------------|
| PRDM15   | 2.50E-04 | -0.4225 | 0.434 | 0.64 | 1 MS.Trt_vs_MS.NoTrt_B |
| ECT2L    | 2.51E-04 | -0.4051 | 0.216 | 0.36 | 1 MS.Trt_vs_MS.NoTrt_B |
| CUL3     | 2.52E-04 | 0.40144 | 0.288 | 0.46 | 1 MS.Trt_vs_MS.NoTrt_B |
| TRMT2B   | 2.53E-04 | -0.3877 | 0.492 | 0.68 | 1 MS.Trt_vs_MS.NoTrt_B |
| ZNF397   | 2.53E-04 | -0.4213 | 0.904 | 0.96 | 1 MS.Trt_vs_MS.NoTrt_B |
| MIF4GD   | 2.53E-04 | -1.028  | 0.063 | 0.15 | 1 MS.Trt_vs_MS.NoTrt_B |
| TMX2     | 2.54E-04 | -0.374  | 0.065 | 0.16 | 1 MS.Trt_vs_MS.NoTrt_B |
| FAM20B   | 2.54E-04 | -1.1951 | 0.416 | 0.62 | 1 MS.Trt_vs_MS.NoTrt_B |
| GBA      | 2.55E-04 | -0.6729 | 0.336 | 0.5  | 1 MS.Trt_vs_MS.NoTrt_B |
| PATZ1    | 2.55E-04 | 0.30064 | 0.092 | 0.2  | 1 MS.Trt_vs_MS.NoTrt_B |
| SRRM1    | 2.55E-04 | 0.29309 | 0.747 | 0.93 | 1 MS.Trt_vs_MS.NoTrt_B |
| POLR2G   | 2.58E-04 | -0.3042 | 0.15  | 0.28 | 1 MS.Trt_vs_MS.NoTrt_B |
| CPD      | 2.58E-04 | 0.34645 | 0.536 | 0.74 | 1 MS.Trt_vs_MS.NoTrt_B |
| ZBTB33   | 2.58E-04 | -0.5055 | 0.041 | 0.12 | 1 MS.Trt_vs_MS.NoTrt_B |
| C17orf51 | 2.58E-04 | 0.32744 | 0.296 | 0.47 | 1 MS.Trt_vs_MS.NoTrt_B |
| ATP6V1E1 | 2.61E-04 | -0.4526 | 0.471 | 0.66 | 1 MS.Trt_vs_MS.NoTrt_B |
| TKT      | 2.61E-04 | -0.3367 | 0.477 | 0.61 | 1 MS.Trt_vs_MS.NoTrt_B |
| LPO      | 2.61E-04 | -0.3849 | 0.455 | 0.62 | 1 MS.Trt_vs_MS.NoTrt_B |
| TTC14    | 2.66E-04 | 0.71834 | 0.294 | 0.46 | 1 MS.Trt_vs_MS.NoTrt_B |
| ZNF549   | 2.67E-04 | 0.72904 | 0.538 | 0.7  | 1 MS.Trt_vs_MS.NoTrt_B |
| CGRRF1   | 2.69E-04 | 0.31896 | 0.216 | 0.35 | 1 MS.Trt_vs_MS.NoTrt_B |
| ZNF66    | 2.70E-04 | 0.52855 | 0.488 | 0.69 | 1 MS.Trt_vs_MS.NoTrt_B |
| HPRT1    | 2.70E-04 | -0.5057 | 0.087 | 0.19 | 1 MS.Trt_vs_MS.NoTrt_B |
| DCAF12   | 2.72E-04 | -1.0465 | 0.057 | 0.14 | 1 MS.Trt_vs_MS.NoTrt_B |
| NFYB     | 2.75E-04 | 0.7574  | 0.207 | 0.34 | 1 MS.Trt_vs_MS.NoTrt_B |
| UROS     | 2.77E-04 | -1.0152 | 0.338 | 0.49 | 1 MS.Trt_vs_MS.NoTrt_B |
| AKR7A2   | 2.78E-04 | -0.4054 | 0.098 | 0.21 | 1 MS.Trt_vs_MS.NoTrt_B |
| RAB22A   | 2.78E-04 | 0.27318 | 0.527 | 0.7  | 1 MS.Trt_vs_MS.NoTrt_B |
| PWP1     | 2.79E-04 | -0.3259 | 0.124 | 0.24 | 1 MS.Trt_vs_MS.NoTrt_B |
| DBT      | 2.79E-04 | -0.3398 | 0.682 | 0.85 | 1 MS.Trt_vs_MS.NoTrt_B |
| RFT1     | 2.83E-04 | -0.5287 | 0.338 | 0.52 | 1 MS.Trt_vs_MS.NoTrt_B |
| NDUFC2   | 2.83E-04 | 0.51682 | 0.462 | 0.65 | 1 MS.Trt_vs_MS.NoTrt_B |
| OCIAD2   | 2.84E-04 | 0.53493 | 0.538 | 0.72 | 1 MS.Trt_vs_MS.NoTrt_B |
| ACP2     | 2.88E-04 | -1.1642 | 0.033 | 0.1  | 1 MS.Trt_vs_MS.NoTrt_B |
| AP3S2    | 2.89E-04 | -0.617  | 0.551 | 0.68 | 1 MS.Trt_vs_MS.NoTrt_B |
| GCAT     | 2.93E-04 | 0.85863 | 0.153 | 0.28 | 1 MS.Trt_vs_MS.NoTrt_B |
| DHX57    | 2.96E-04 | 0.5123  | 0.414 | 0.6  | 1 MS.Trt_vs_MS.NoTrt_B |
| PIH1D1   | 2.99E-04 | -0.3519 | 0.2   | 0.32 | 1 MS.Trt_vs_MS.NoTrt_B |
| LDHAL6A  | 3.00E-04 | 0.25491 | 0.227 | 0.37 | 1 MS.Trt_vs_MS.NoTrt_B |
| UPF2     | 3.01E-04 | -0.3275 | 0.183 | 0.32 | 1 MS.Trt_vs_MS.NoTrt_B |

|            |          |         |       |      |                        |
|------------|----------|---------|-------|------|------------------------|
| CHFR       | 3.03E-04 | -0.3448 | 0.817 | 0.94 | 1 MS.Trt_vs_MS.NoTrt_B |
| WDR70      | 3.03E-04 | -0.7845 | 0.214 | 0.35 | 1 MS.Trt_vs_MS.NoTrt_B |
| ZNF106     | 3.03E-04 | 0.29207 | 0.717 | 0.84 | 1 MS.Trt_vs_MS.NoTrt_B |
| DUSP22     | 3.04E-04 | -0.4972 | 0.063 | 0.15 | 1 MS.Trt_vs_MS.NoTrt_B |
| FAM134C    | 3.04E-04 | -0.3819 | 0.475 | 0.62 | 1 MS.Trt_vs_MS.NoTrt_B |
| CEP68      | 3.05E-04 | -0.5961 | 0.431 | 0.58 | 1 MS.Trt_vs_MS.NoTrt_B |
| ARRDC5     | 3.05E-04 | -0.6219 | 0.072 | 0.17 | 1 MS.Trt_vs_MS.NoTrt_B |
| ZNF550     | 3.06E-04 | -0.3032 | 0.198 | 0.33 | 1 MS.Trt_vs_MS.NoTrt_B |
| FKBP3      | 3.06E-04 | 0.72327 | 0.242 | 0.38 | 1 MS.Trt_vs_MS.NoTrt_B |
| PEPD       | 3.07E-04 | -1.0709 | 0.094 | 0.19 | 1 MS.Trt_vs_MS.NoTrt_B |
| TMEM223    | 3.08E-04 | -0.7973 | 0.109 | 0.21 | 1 MS.Trt_vs_MS.NoTrt_B |
| NSUN2      | 3.10E-04 | -0.4553 | 0.529 | 0.72 | 1 MS.Trt_vs_MS.NoTrt_B |
| NDOR1      | 3.10E-04 | -0.3326 | 0.041 | 0.12 | 1 MS.Trt_vs_MS.NoTrt_B |
| ADA        | 3.12E-04 | -0.942  | 0.046 | 0.12 | 1 MS.Trt_vs_MS.NoTrt_B |
| RP11-619A1 | 3.14E-04 | -0.3489 | 0.453 | 0.62 | 1 MS.Trt_vs_MS.NoTrt_B |
| ERN1       | 3.14E-04 | 0.31267 | 0.595 | 0.77 | 1 MS.Trt_vs_MS.NoTrt_B |
| HECA       | 3.19E-04 | 0.46444 | 0.44  | 0.61 | 1 MS.Trt_vs_MS.NoTrt_B |
| ACACA      | 3.24E-04 | -0.6153 | 0.46  | 0.65 | 1 MS.Trt_vs_MS.NoTrt_B |
| HEMK1      | 3.25E-04 | -0.6252 | 0.865 | 0.98 | 1 MS.Trt_vs_MS.NoTrt_B |
| WDR7       | 3.26E-04 | -0.5254 | 0.266 | 0.41 | 1 MS.Trt_vs_MS.NoTrt_B |
| BAK1       | 3.28E-04 | -0.9166 | 0.072 | 0.16 | 1 MS.Trt_vs_MS.NoTrt_B |
| SLC25A4    | 3.29E-04 | 0.34312 | 0.205 | 0.35 | 1 MS.Trt_vs_MS.NoTrt_B |
| PHLDA3     | 3.33E-04 | -0.3918 | 0.257 | 0.41 | 1 MS.Trt_vs_MS.NoTrt_B |
| LY6G5B     | 3.33E-04 | -0.4195 | 0.664 | 0.85 | 1 MS.Trt_vs_MS.NoTrt_B |
| SSR4       | 3.34E-04 | -0.3111 | 0.246 | 0.38 | 1 MS.Trt_vs_MS.NoTrt_B |
| CRBN       | 3.35E-04 | 0.50998 | 0.375 | 0.55 | 1 MS.Trt_vs_MS.NoTrt_B |
| GOLPH3L    | 3.35E-04 | 0.27666 | 0.122 | 0.24 | 1 MS.Trt_vs_MS.NoTrt_B |
| TESC       | 3.38E-04 | -0.4734 | 0.129 | 0.24 | 1 MS.Trt_vs_MS.NoTrt_B |
| ZDHHC4     | 3.39E-04 | -0.2765 | 0.294 | 0.45 | 1 MS.Trt_vs_MS.NoTrt_B |
| SCAPER     | 3.40E-04 | -0.3402 | 0.172 | 0.3  | 1 MS.Trt_vs_MS.NoTrt_B |
| TMEM156    | 3.40E-04 | 0.50621 | 0.617 | 0.81 | 1 MS.Trt_vs_MS.NoTrt_B |
| PDP2       | 3.41E-04 | -0.5151 | 0.682 | 0.87 | 1 MS.Trt_vs_MS.NoTrt_B |
| CDC16      | 3.41E-04 | -0.3347 | 0.1   | 0.2  | 1 MS.Trt_vs_MS.NoTrt_B |
| ITPK1      | 3.44E-04 | 0.26102 | 0.464 | 0.65 | 1 MS.Trt_vs_MS.NoTrt_B |
| MYO1F      | 3.44E-04 | -0.3143 | 0.745 | 0.85 | 1 MS.Trt_vs_MS.NoTrt_B |
| RRN3       | 3.45E-04 | -0.6259 | 0.196 | 0.32 | 1 MS.Trt_vs_MS.NoTrt_B |
| RBM25      | 3.46E-04 | 0.27714 | 0.462 | 0.64 | 1 MS.Trt_vs_MS.NoTrt_B |
| BRWD1      | 3.47E-04 | 0.57644 | 0.68  | 0.85 | 1 MS.Trt_vs_MS.NoTrt_B |
| ZBTB46     | 3.47E-04 | 0.49652 | 0.052 | 0.14 | 1 MS.Trt_vs_MS.NoTrt_B |
| PRRT3      | 3.49E-04 | 0.47215 | 0.231 | 0.37 | 1 MS.Trt_vs_MS.NoTrt_B |

|          |          |         |       |      |   |                      |
|----------|----------|---------|-------|------|---|----------------------|
| NAMPT    | 3.49E-04 | -0.4515 | 0.56  | 0.71 | 1 | MS.Trt_vs_MS.NoTrt_B |
| PET100   | 3.51E-04 | 0.40638 | 0.527 | 0.7  | 1 | MS.Trt_vs_MS.NoTrt_B |
| LRRC37A  | 3.53E-04 | 0.50331 | 0.294 | 0.44 | 1 | MS.Trt_vs_MS.NoTrt_B |
| PCDHGA8  | 3.54E-04 | -0.7178 | 0.458 | 0.58 | 1 | MS.Trt_vs_MS.NoTrt_B |
| RHNO1    | 3.59E-04 | -0.8567 | 0.542 | 0.68 | 1 | MS.Trt_vs_MS.NoTrt_B |
| GPR89B   | 3.61E-04 | -0.6495 | 0.251 | 0.38 | 1 | MS.Trt_vs_MS.NoTrt_B |
| CBR1     | 3.61E-04 | -0.4544 | 0.052 | 0.14 | 1 | MS.Trt_vs_MS.NoTrt_B |
| ESR2     | 3.62E-04 | -0.2931 | 0.418 | 0.59 | 1 | MS.Trt_vs_MS.NoTrt_B |
| HAGH     | 3.64E-04 | -0.592  | 0.612 | 0.77 | 1 | MS.Trt_vs_MS.NoTrt_B |
| OXR1     | 3.65E-04 | -0.4522 | 0.057 | 0.14 | 1 | MS.Trt_vs_MS.NoTrt_B |
| FAM50A   | 3.68E-04 | -0.5585 | 0.068 | 0.16 | 1 | MS.Trt_vs_MS.NoTrt_B |
| FAM78A   | 3.69E-04 | -0.3078 | 0.255 | 0.4  | 1 | MS.Trt_vs_MS.NoTrt_B |
| LRRC58   | 3.71E-04 | -0.3261 | 0.597 | 0.73 | 1 | MS.Trt_vs_MS.NoTrt_B |
| ABCB7    | 3.75E-04 | 0.53687 | 0.519 | 0.7  | 1 | MS.Trt_vs_MS.NoTrt_B |
| GLTSCR1L | 3.75E-04 | 0.36241 | 0.115 | 0.23 | 1 | MS.Trt_vs_MS.NoTrt_B |
| HBG2     | 3.76E-04 | 1.5617  | 0.318 | 0.48 | 1 | MS.Trt_vs_MS.NoTrt_B |
| SMAD9    | 3.79E-04 | -0.6493 | 0.246 | 0.37 | 1 | MS.Trt_vs_MS.NoTrt_B |
| SP2      | 3.80E-04 | 0.60419 | 0.22  | 0.37 | 1 | MS.Trt_vs_MS.NoTrt_B |
| HAUS6    | 3.80E-04 | 0.29234 | 0.22  | 0.36 | 1 | MS.Trt_vs_MS.NoTrt_B |
| SH3BGRL  | 3.81E-04 | 0.34983 | 0.272 | 0.44 | 1 | MS.Trt_vs_MS.NoTrt_B |
| PPM1K    | 3.83E-04 | -0.6113 | 0.819 | 0.89 | 1 | MS.Trt_vs_MS.NoTrt_B |
| ZNF561   | 3.83E-04 | -0.7292 | 0.399 | 0.55 | 1 | MS.Trt_vs_MS.NoTrt_B |
| ATP8B2   | 3.83E-04 | -0.2666 | 0.71  | 0.83 | 1 | MS.Trt_vs_MS.NoTrt_B |
| DUS3L    | 3.87E-04 | -0.4694 | 0.083 | 0.18 | 1 | MS.Trt_vs_MS.NoTrt_B |
| FCRL5    | 3.89E-04 | 0.39463 | 0.288 | 0.46 | 1 | MS.Trt_vs_MS.NoTrt_B |
| C6orf1   | 3.89E-04 | -0.6823 | 0.061 | 0.15 | 1 | MS.Trt_vs_MS.NoTrt_B |
| MRPL16   | 3.91E-04 | 0.40098 | 0.107 | 0.22 | 1 | MS.Trt_vs_MS.NoTrt_B |
| GAB3     | 3.91E-04 | 1.53365 | 0.229 | 0.39 | 1 | MS.Trt_vs_MS.NoTrt_B |
| CLDN19   | 3.92E-04 | -0.3854 | 0.155 | 0.28 | 1 | MS.Trt_vs_MS.NoTrt_B |
| RPTOR    | 3.95E-04 | 0.4242  | 0.253 | 0.4  | 1 | MS.Trt_vs_MS.NoTrt_B |
| NPEPL1   | 3.96E-04 | 0.3248  | 0.105 | 0.22 | 1 | MS.Trt_vs_MS.NoTrt_B |
| DAD1     | 3.98E-04 | 0.37906 | 0.268 | 0.44 | 1 | MS.Trt_vs_MS.NoTrt_B |
| BCL7B    | 4.00E-04 | -0.556  | 0.37  | 0.51 | 1 | MS.Trt_vs_MS.NoTrt_B |
| QSOX2    | 4.03E-04 | 0.38543 | 0.085 | 0.18 | 1 | MS.Trt_vs_MS.NoTrt_B |
| SLC38A9  | 4.07E-04 | 0.755   | 0.285 | 0.45 | 1 | MS.Trt_vs_MS.NoTrt_B |
| PPP1R10  | 4.09E-04 | -0.4175 | 0.353 | 0.5  | 1 | MS.Trt_vs_MS.NoTrt_B |
| HPF1     | 4.10E-04 | 0.33686 | 0.063 | 0.15 | 1 | MS.Trt_vs_MS.NoTrt_B |
| HSP90AB1 | 4.11E-04 | -0.2807 | 0.412 | 0.56 | 1 | MS.Trt_vs_MS.NoTrt_B |
| USP25    | 4.15E-04 | 0.82299 | 0.357 | 0.54 | 1 | MS.Trt_vs_MS.NoTrt_B |
| SRD5A1   | 4.15E-04 | -0.7753 | 0.466 | 0.68 | 1 | MS.Trt_vs_MS.NoTrt_B |

|          |          |         |       |      |   |                      |
|----------|----------|---------|-------|------|---|----------------------|
| TNFAIP8  | 4.15E-04 | 0.27799 | 0.732 | 0.88 | 1 | MS.Trt_vs_MS.NoTrt_B |
| GNG2     | 4.21E-04 | 0.26097 | 0.244 | 0.38 | 1 | MS.Trt_vs_MS.NoTrt_B |
| PPP4R2   | 4.22E-04 | 0.25962 | 0.283 | 0.44 | 1 | MS.Trt_vs_MS.NoTrt_B |
| CDADC1   | 4.23E-04 | -0.3418 | 0.05  | 0.13 | 1 | MS.Trt_vs_MS.NoTrt_B |
| ZNF395   | 4.26E-04 | 0.67289 | 0.425 | 0.61 | 1 | MS.Trt_vs_MS.NoTrt_B |
| GPR137   | 4.28E-04 | -0.7604 | 0.135 | 0.25 | 1 | MS.Trt_vs_MS.NoTrt_B |
| BEAN1    | 4.36E-04 | 0.75769 | 0.29  | 0.46 | 1 | MS.Trt_vs_MS.NoTrt_B |
| POLE3    | 4.39E-04 | -0.3403 | 0.179 | 0.3  | 1 | MS.Trt_vs_MS.NoTrt_B |
| LRP10    | 4.40E-04 | 0.30262 | 0.63  | 0.8  | 1 | MS.Trt_vs_MS.NoTrt_B |
| RASGRP4  | 4.42E-04 | -0.6315 | 0.351 | 0.5  | 1 | MS.Trt_vs_MS.NoTrt_B |
| RPL26    | 4.44E-04 | -0.2644 | 0.806 | 0.92 | 1 | MS.Trt_vs_MS.NoTrt_B |
| SLC25A53 | 4.44E-04 | 0.72408 | 0.32  | 0.47 | 1 | MS.Trt_vs_MS.NoTrt_B |
| PRAMEF1  | 4.46E-04 | 0.79202 | 0.041 | 0.12 | 1 | MS.Trt_vs_MS.NoTrt_B |
| IKBKE    | 4.50E-04 | -0.6164 | 0.218 | 0.35 | 1 | MS.Trt_vs_MS.NoTrt_B |
| LRRC37A2 | 4.55E-04 | 0.25951 | 0.566 | 0.76 | 1 | MS.Trt_vs_MS.NoTrt_B |
| FAM84B   | 4.56E-04 | -0.5743 | 0.044 | 0.12 | 1 | MS.Trt_vs_MS.NoTrt_B |
| PIP5K1A  | 4.56E-04 | -0.7631 | 0.386 | 0.54 | 1 | MS.Trt_vs_MS.NoTrt_B |
| AFDN     | 4.60E-04 | -0.5612 | 0.044 | 0.12 | 1 | MS.Trt_vs_MS.NoTrt_B |
| SPOP     | 4.64E-04 | -0.2539 | 0.893 | 0.98 | 1 | MS.Trt_vs_MS.NoTrt_B |
| STAM2    | 4.64E-04 | -0.396  | 0.416 | 0.58 | 1 | MS.Trt_vs_MS.NoTrt_B |
| ARMC1    | 4.67E-04 | -0.3314 | 0.065 | 0.15 | 1 | MS.Trt_vs_MS.NoTrt_B |
| CHRNA6   | 4.68E-04 | -0.6664 | 0.318 | 0.5  | 1 | MS.Trt_vs_MS.NoTrt_B |
| C16orf62 | 4.69E-04 | -0.326  | 0.902 | 0.99 | 1 | MS.Trt_vs_MS.NoTrt_B |
| C9orf3   | 4.73E-04 | -0.3471 | 0.536 | 0.73 | 1 | MS.Trt_vs_MS.NoTrt_B |
| PLA2G12A | 4.75E-04 | 0.26127 | 0.473 | 0.65 | 1 | MS.Trt_vs_MS.NoTrt_B |
| IFT57    | 0.00048  | -0.8521 | 0.048 | 0.12 | 1 | MS.Trt_vs_MS.NoTrt_B |
| SFXN1    | 4.83E-04 | 0.33816 | 0.654 | 0.82 | 1 | MS.Trt_vs_MS.NoTrt_B |
| KCNN4    | 4.85E-04 | -0.3162 | 0.115 | 0.22 | 1 | MS.Trt_vs_MS.NoTrt_B |
| C5orf45  | 4.85E-04 | -0.3475 | 0.767 | 0.91 | 1 | MS.Trt_vs_MS.NoTrt_B |
| HUS1     | 4.88E-04 | 0.48474 | 0.368 | 0.52 | 1 | MS.Trt_vs_MS.NoTrt_B |
| RMDN1    | 4.89E-04 | 0.36017 | 0.584 | 0.74 | 1 | MS.Trt_vs_MS.NoTrt_B |
| ATP5H    | 4.91E-04 | 0.58439 | 0.636 | 0.78 | 1 | MS.Trt_vs_MS.NoTrt_B |
| NNT      | 4.96E-04 | -0.721  | 0.495 | 0.63 | 1 | MS.Trt_vs_MS.NoTrt_B |
| PLEKHM3  | 4.99E-04 | -0.4943 | 0.475 | 0.63 | 1 | MS.Trt_vs_MS.NoTrt_B |
| WWP1     | 5.01E-04 | 0.64246 | 0.322 | 0.51 | 1 | MS.Trt_vs_MS.NoTrt_B |
| RABGGTA  | 5.05E-04 | -0.4508 | 0.072 | 0.16 | 1 | MS.Trt_vs_MS.NoTrt_B |
| HIVEP1   | 5.09E-04 | 0.79415 | 0.527 | 0.73 | 1 | MS.Trt_vs_MS.NoTrt_B |
| FBXO22   | 5.09E-04 | 0.51422 | 0.619 | 0.81 | 1 | MS.Trt_vs_MS.NoTrt_B |
| KRCC1    | 5.11E-04 | -0.4177 | 0.072 | 0.16 | 1 | MS.Trt_vs_MS.NoTrt_B |
| ULK4     | 5.12E-04 | -0.3896 | 0.211 | 0.35 | 1 | MS.Trt_vs_MS.NoTrt_B |

|          |          |         |       |      |                        |
|----------|----------|---------|-------|------|------------------------|
| PARVB    | 5.19E-04 | -0.4402 | 0.551 | 0.7  | 1 MS.Trt_vs_MS.NoTrt_B |
| KLRD1    | 5.21E-04 | 0.30715 | 0.874 | 0.98 | 1 MS.Trt_vs_MS.NoTrt_B |
| PIGN     | 5.24E-04 | 0.63351 | 0.414 | 0.6  | 1 MS.Trt_vs_MS.NoTrt_B |
| PTRHD1   | 5.25E-04 | -0.4011 | 0.198 | 0.32 | 1 MS.Trt_vs_MS.NoTrt_B |
| RNGTT    | 5.28E-04 | -0.3394 | 0.259 | 0.39 | 1 MS.Trt_vs_MS.NoTrt_B |
| ZNF639   | 5.29E-04 | 0.30017 | 0.756 | 0.93 | 1 MS.Trt_vs_MS.NoTrt_B |
| HEBP1    | 5.30E-04 | -0.5919 | 0.153 | 0.27 | 1 MS.Trt_vs_MS.NoTrt_B |
| APOA2    | 5.30E-04 | -0.3549 | 0.176 | 0.29 | 1 MS.Trt_vs_MS.NoTrt_B |
| ZNF74    | 5.31E-04 | -0.3306 | 0.316 | 0.47 | 1 MS.Trt_vs_MS.NoTrt_B |
| EDC3     | 5.32E-04 | -0.2874 | 0.266 | 0.41 | 1 MS.Trt_vs_MS.NoTrt_B |
| FCHSD1   | 5.35E-04 | -0.4878 | 0.222 | 0.35 | 1 MS.Trt_vs_MS.NoTrt_B |
| MUC15    | 5.35E-04 | -0.3134 | 0.081 | 0.17 | 1 MS.Trt_vs_MS.NoTrt_B |
| INPP5K   | 5.37E-04 | -0.5711 | 0.412 | 0.55 | 1 MS.Trt_vs_MS.NoTrt_B |
| LIG1     | 5.38E-04 | -0.5129 | 0.115 | 0.22 | 1 MS.Trt_vs_MS.NoTrt_B |
| TMEM184C | 5.42E-04 | 0.29086 | 0.414 | 0.58 | 1 MS.Trt_vs_MS.NoTrt_B |
| SPATA4   | 5.42E-04 | 0.27362 | 0.492 | 0.36 | 1 MS.Trt_vs_MS.NoTrt_B |
| SLC30A7  | 5.44E-04 | 0.47325 | 0.473 | 0.64 | 1 MS.Trt_vs_MS.NoTrt_B |
| DNAJB6   | 5.45E-04 | -0.3144 | 0.486 | 0.6  | 1 MS.Trt_vs_MS.NoTrt_B |
| BCAP31   | 5.46E-04 | -0.2803 | 0.124 | 0.24 | 1 MS.Trt_vs_MS.NoTrt_B |
| RABGAP1  | 5.48E-04 | -0.6092 | 0.292 | 0.44 | 1 MS.Trt_vs_MS.NoTrt_B |
| BROX     | 5.48E-04 | 0.43356 | 0.516 | 0.67 | 1 MS.Trt_vs_MS.NoTrt_B |
| PRAF2    | 5.51E-04 | -0.5182 | 0.054 | 0.14 | 1 MS.Trt_vs_MS.NoTrt_B |
| NMT2     | 5.53E-04 | -0.6611 | 0.815 | 0.92 | 1 MS.Trt_vs_MS.NoTrt_B |
| UTY      | 5.54E-04 | -2.3705 | 0.349 | 0.47 | 1 MS.Trt_vs_MS.NoTrt_B |
| EIF4A3   | 5.57E-04 | -0.5828 | 0.564 | 0.71 | 1 MS.Trt_vs_MS.NoTrt_B |
| FARSA    | 5.62E-04 | -0.4842 | 0.092 | 0.19 | 1 MS.Trt_vs_MS.NoTrt_B |
| FAM234A  | 5.62E-04 | -0.6088 | 0.161 | 0.28 | 1 MS.Trt_vs_MS.NoTrt_B |
| NRROS    | 5.66E-04 | -1.043  | 0.07  | 0.16 | 1 MS.Trt_vs_MS.NoTrt_B |
| ZNF682   | 5.66E-04 | -0.7642 | 0.283 | 0.42 | 1 MS.Trt_vs_MS.NoTrt_B |
| PTTG1    | 5.68E-04 | -0.2803 | 0.072 | 0.16 | 1 MS.Trt_vs_MS.NoTrt_B |
| PHRF1    | 5.68E-04 | -0.723  | 0.087 | 0.18 | 1 MS.Trt_vs_MS.NoTrt_B |
| TMEM167A | 5.69E-04 | 0.28192 | 0.279 | 0.43 | 1 MS.Trt_vs_MS.NoTrt_B |
| PRDX6    | 5.69E-04 | -0.4046 | 0.129 | 0.24 | 1 MS.Trt_vs_MS.NoTrt_B |
| VPS16    | 5.69E-04 | -0.8383 | 0.074 | 0.16 | 1 MS.Trt_vs_MS.NoTrt_B |
| MRPL21   | 5.69E-04 | -0.6542 | 0.074 | 0.16 | 1 MS.Trt_vs_MS.NoTrt_B |
| C19orf47 | 5.75E-04 | -0.3614 | 0.355 | 0.51 | 1 MS.Trt_vs_MS.NoTrt_B |
| MDH1     | 5.76E-04 | 0.48984 | 0.488 | 0.69 | 1 MS.Trt_vs_MS.NoTrt_B |
| EME2     | 5.76E-04 | 0.27303 | 0.19  | 0.32 | 1 MS.Trt_vs_MS.NoTrt_B |
| RGMB     | 5.76E-04 | -1.1294 | 0.052 | 0.13 | 1 MS.Trt_vs_MS.NoTrt_B |
| SMG5     | 5.80E-04 | -0.4177 | 0.085 | 0.18 | 1 MS.Trt_vs_MS.NoTrt_B |

|            |          |         |       |      |   |                      |
|------------|----------|---------|-------|------|---|----------------------|
| PIGK       | 5.81E-04 | 0.33894 | 0.061 | 0.15 | 1 | MS.Trt_vs_MS.NoTrt_B |
| HEATR3     | 5.84E-04 | -0.5378 | 0.468 | 0.68 | 1 | MS.Trt_vs_MS.NoTrt_B |
| POLM       | 5.84E-04 | -0.4621 | 0.397 | 0.55 | 1 | MS.Trt_vs_MS.NoTrt_B |
| SURF6      | 5.86E-04 | -0.422  | 0.379 | 0.56 | 1 | MS.Trt_vs_MS.NoTrt_B |
| PKNOX1     | 5.90E-04 | -0.2769 | 0.632 | 0.72 | 1 | MS.Trt_vs_MS.NoTrt_B |
| PEX11A     | 5.90E-04 | 0.81995 | 0.447 | 0.63 | 1 | MS.Trt_vs_MS.NoTrt_B |
| ATG12      | 5.93E-04 | 0.34934 | 0.649 | 0.78 | 1 | MS.Trt_vs_MS.NoTrt_B |
| RNF4       | 5.94E-04 | 0.38924 | 0.673 | 0.77 | 1 | MS.Trt_vs_MS.NoTrt_B |
| PHB        | 5.95E-04 | -0.3577 | 0.105 | 0.21 | 1 | MS.Trt_vs_MS.NoTrt_B |
| RP5-994D16 | 5.96E-04 | -0.5607 | 0.39  | 0.57 | 1 | MS.Trt_vs_MS.NoTrt_B |
| HLCS       | 5.96E-04 | 0.39381 | 0.564 | 0.74 | 1 | MS.Trt_vs_MS.NoTrt_B |
| UBE3A      | 5.99E-04 | 0.48521 | 0.394 | 0.55 | 1 | MS.Trt_vs_MS.NoTrt_B |
| YIF1B      | 6.00E-04 | 0.27074 | 0.499 | 0.67 | 1 | MS.Trt_vs_MS.NoTrt_B |
| NARS2      | 6.03E-04 | -0.3927 | 0.281 | 0.42 | 1 | MS.Trt_vs_MS.NoTrt_B |
| PPARD      | 6.05E-04 | -0.2879 | 0.405 | 0.56 | 1 | MS.Trt_vs_MS.NoTrt_B |
| GEMIN4     | 6.06E-04 | -0.2619 | 0.035 | 0.1  | 1 | MS.Trt_vs_MS.NoTrt_B |
| MTRNR2L10  | 6.08E-04 | 0.38051 | 0.871 | 1    | 1 | MS.Trt_vs_MS.NoTrt_B |
| HECTD4     | 6.09E-04 | 0.55056 | 0.521 | 0.69 | 1 | MS.Trt_vs_MS.NoTrt_B |
| ARPC5      | 6.11E-04 | 0.4826  | 0.813 | 0.94 | 1 | MS.Trt_vs_MS.NoTrt_B |
| KLHL32     | 6.16E-04 | -0.9975 | 0.052 | 0.13 | 1 | MS.Trt_vs_MS.NoTrt_B |
| GDI2       | 6.17E-04 | 0.3251  | 0.316 | 0.48 | 1 | MS.Trt_vs_MS.NoTrt_B |
| SIGLEC6    | 6.17E-04 | -0.2573 | 0.355 | 0.5  | 1 | MS.Trt_vs_MS.NoTrt_B |
| SLC47A2    | 6.18E-04 | 0.47922 | 0.146 | 0.27 | 1 | MS.Trt_vs_MS.NoTrt_B |
| CTNNA1     | 6.21E-04 | -0.2959 | 0.44  | 0.63 | 1 | MS.Trt_vs_MS.NoTrt_B |
| KLHL22     | 6.27E-04 | -0.2958 | 0.129 | 0.24 | 1 | MS.Trt_vs_MS.NoTrt_B |
| TOR1AIP2   | 6.30E-04 | 0.25304 | 0.926 | 0.98 | 1 | MS.Trt_vs_MS.NoTrt_B |
| CRELD2     | 6.31E-04 | -0.9285 | 0.466 | 0.61 | 1 | MS.Trt_vs_MS.NoTrt_B |
| NOP56      | 6.34E-04 | 0.30628 | 0.316 | 0.47 | 1 | MS.Trt_vs_MS.NoTrt_B |
| ACSS1      | 6.35E-04 | -0.9556 | 0.462 | 0.62 | 1 | MS.Trt_vs_MS.NoTrt_B |
| MICA       | 6.36E-04 | 0.31184 | 0.632 | 0.82 | 1 | MS.Trt_vs_MS.NoTrt_B |
| ZNF346     | 6.38E-04 | -0.4473 | 0.645 | 0.77 | 1 | MS.Trt_vs_MS.NoTrt_B |
| CNDP2      | 6.38E-04 | -0.4757 | 0.553 | 0.71 | 1 | MS.Trt_vs_MS.NoTrt_B |
| ISY1       | 6.41E-04 | -0.6385 | 0.466 | 0.64 | 1 | MS.Trt_vs_MS.NoTrt_B |
| TFIP11     | 6.48E-04 | -0.8697 | 0.346 | 0.51 | 1 | MS.Trt_vs_MS.NoTrt_B |
| MTRNR2L12  | 6.49E-04 | 0.25455 | 0.985 | 1    | 1 | MS.Trt_vs_MS.NoTrt_B |
| P4HB       | 6.50E-04 | -0.6472 | 0.523 | 0.65 | 1 | MS.Trt_vs_MS.NoTrt_B |
| LRCH3      | 6.50E-04 | -0.2957 | 0.919 | 0.99 | 1 | MS.Trt_vs_MS.NoTrt_B |
| SPON2      | 6.51E-04 | -0.6121 | 0.283 | 0.42 | 1 | MS.Trt_vs_MS.NoTrt_B |
| FEZ2       | 6.51E-04 | -0.598  | 0.34  | 0.5  | 1 | MS.Trt_vs_MS.NoTrt_B |
| SF3B5      | 6.55E-04 | -0.3852 | 0.076 | 0.17 | 1 | MS.Trt_vs_MS.NoTrt_B |



|            |          |         |       |      |   |                      |
|------------|----------|---------|-------|------|---|----------------------|
| MBTPS1     | 6.56E-04 | -0.382  | 0.41  | 0.55 | 1 | MS.Trt_vs_MS.NoTrt_B |
| CCDC127    | 6.61E-04 | -0.5555 | 0.593 | 0.79 | 1 | MS.Trt_vs_MS.NoTrt_B |
| B4GALT3    | 6.61E-04 | -0.6203 | 0.113 | 0.22 | 1 | MS.Trt_vs_MS.NoTrt_B |
| CDC42SE2   | 6.74E-04 | 0.44564 | 0.758 | 0.95 | 1 | MS.Trt_vs_MS.NoTrt_B |
| TMEM126A   | 6.78E-04 | -0.7289 | 0.046 | 0.12 | 1 | MS.Trt_vs_MS.NoTrt_B |
| RCL1       | 6.80E-04 | 0.67194 | 0.331 | 0.5  | 1 | MS.Trt_vs_MS.NoTrt_B |
| TWSG1      | 6.80E-04 | -0.56   | 0.277 | 0.43 | 1 | MS.Trt_vs_MS.NoTrt_B |
| PLEKHH2    | 6.80E-04 | 0.4591  | 0.473 | 0.68 | 1 | MS.Trt_vs_MS.NoTrt_B |
| LCMT1      | 6.81E-04 | 0.34135 | 0.107 | 0.21 | 1 | MS.Trt_vs_MS.NoTrt_B |
| PPCDC      | 6.83E-04 | -0.7639 | 0.039 | 0.11 | 1 | MS.Trt_vs_MS.NoTrt_B |
| CXorf38    | 6.87E-04 | -0.5934 | 0.708 | 0.82 | 1 | MS.Trt_vs_MS.NoTrt_B |
| SNRPA1     | 6.90E-04 | 0.34074 | 0.569 | 0.73 | 1 | MS.Trt_vs_MS.NoTrt_B |
| EIF2AK1    | 6.91E-04 | -0.5209 | 0.331 | 0.48 | 1 | MS.Trt_vs_MS.NoTrt_B |
| ROCK2      | 6.91E-04 | 0.36033 | 0.336 | 0.48 | 1 | MS.Trt_vs_MS.NoTrt_B |
| TDP1       | 7.04E-04 | -0.3031 | 0.203 | 0.34 | 1 | MS.Trt_vs_MS.NoTrt_B |
| ETNK1      | 7.07E-04 | 0.51919 | 0.379 | 0.57 | 1 | MS.Trt_vs_MS.NoTrt_B |
| LRFN1      | 7.10E-04 | -0.4045 | 0.068 | 0.15 | 1 | MS.Trt_vs_MS.NoTrt_B |
| PTDSS1     | 7.11E-04 | -0.2721 | 0.27  | 0.4  | 1 | MS.Trt_vs_MS.NoTrt_B |
| GPATCH1    | 7.16E-04 | -0.6819 | 0.266 | 0.38 | 1 | MS.Trt_vs_MS.NoTrt_B |
| EIF2B4     | 7.21E-04 | 0.90062 | 0.366 | 0.52 | 1 | MS.Trt_vs_MS.NoTrt_B |
| RP11-577H5 | 7.22E-04 | -0.8644 | 0.061 | 0.14 | 1 | MS.Trt_vs_MS.NoTrt_B |
| DYM        | 7.23E-04 | -0.3904 | 0.551 | 0.69 | 1 | MS.Trt_vs_MS.NoTrt_B |
| WDR82      | 7.23E-04 | -0.8127 | 0.309 | 0.44 | 1 | MS.Trt_vs_MS.NoTrt_B |
| RCE1       | 7.27E-04 | -0.3781 | 0.052 | 0.13 | 1 | MS.Trt_vs_MS.NoTrt_B |
| RABL2B     | 7.28E-04 | -0.4422 | 0.791 | 0.9  | 1 | MS.Trt_vs_MS.NoTrt_B |
| NDRG3      | 7.31E-04 | -0.332  | 0.275 | 0.42 | 1 | MS.Trt_vs_MS.NoTrt_B |
| VPS39      | 7.33E-04 | 0.58817 | 0.399 | 0.55 | 1 | MS.Trt_vs_MS.NoTrt_B |
| NOP58      | 7.36E-04 | 0.29799 | 0.373 | 0.55 | 1 | MS.Trt_vs_MS.NoTrt_B |
| FZD3       | 7.39E-04 | 0.76825 | 0.451 | 0.63 | 1 | MS.Trt_vs_MS.NoTrt_B |
| ANP32A     | 7.41E-04 | -0.3811 | 0.227 | 0.35 | 1 | MS.Trt_vs_MS.NoTrt_B |
| C5AR2      | 7.42E-04 | -0.2524 | 0.85  | 0.94 | 1 | MS.Trt_vs_MS.NoTrt_B |
| IKBKB      | 7.45E-04 | 0.30002 | 0.739 | 0.87 | 1 | MS.Trt_vs_MS.NoTrt_B |
| MAP4K2     | 7.46E-04 | -0.53   | 0.564 | 0.67 | 1 | MS.Trt_vs_MS.NoTrt_B |
| STX7       | 7.52E-04 | 0.49578 | 0.575 | 0.74 | 1 | MS.Trt_vs_MS.NoTrt_B |
| KLHL36     | 7.55E-04 | -0.3269 | 0.49  | 0.65 | 1 | MS.Trt_vs_MS.NoTrt_B |
| MTRNR2L3   | 7.57E-04 | -0.3446 | 0.285 | 0.17 | 1 | MS.Trt_vs_MS.NoTrt_B |
| NUDT19     | 7.58E-04 | 0.58968 | 0.769 | 0.91 | 1 | MS.Trt_vs_MS.NoTrt_B |
| GATAD1     | 7.60E-04 | 0.6342  | 0.71  | 0.88 | 1 | MS.Trt_vs_MS.NoTrt_B |
| VCPKMT     | 7.61E-04 | -0.3218 | 0.063 | 0.15 | 1 | MS.Trt_vs_MS.NoTrt_B |
| CTD-2207O2 | 7.64E-04 | -0.8524 | 0.096 | 0.19 | 1 | MS.Trt_vs_MS.NoTrt_B |

|           |          |         |       |      |   |                      |
|-----------|----------|---------|-------|------|---|----------------------|
| BMP8A     | 7.66E-04 | -0.3016 | 0.453 | 0.62 | 1 | MS.Trt_vs_MS.NoTrt_B |
| FAM60A    | 7.70E-04 | 0.73613 | 0.39  | 0.55 | 1 | MS.Trt_vs_MS.NoTrt_B |
| SEC24D    | 7.73E-04 | -0.5502 | 0.375 | 0.53 | 1 | MS.Trt_vs_MS.NoTrt_B |
| MTPAP     | 7.73E-04 | 0.45921 | 0.691 | 0.89 | 1 | MS.Trt_vs_MS.NoTrt_B |
| MTAP      | 7.77E-04 | -0.3806 | 0.547 | 0.76 | 1 | MS.Trt_vs_MS.NoTrt_B |
| NAV1      | 7.82E-04 | -0.5873 | 0.747 | 0.85 | 1 | MS.Trt_vs_MS.NoTrt_B |
| GPATCH2L  | 7.82E-04 | 0.26864 | 0.577 | 0.78 | 1 | MS.Trt_vs_MS.NoTrt_B |
| GMIP      | 7.88E-04 | 0.68691 | 0.17  | 0.3  | 1 | MS.Trt_vs_MS.NoTrt_B |
| DIAPH2    | 7.89E-04 | 0.26647 | 0.2   | 0.33 | 1 | MS.Trt_vs_MS.NoTrt_B |
| DNMT1     | 7.91E-04 | -0.2918 | 0.9   | 0.95 | 1 | MS.Trt_vs_MS.NoTrt_B |
| MFHAS1    | 7.94E-04 | -0.7977 | 0.037 | 0.1  | 1 | MS.Trt_vs_MS.NoTrt_B |
| SETD6     | 7.95E-04 | -0.2524 | 0.296 | 0.45 | 1 | MS.Trt_vs_MS.NoTrt_B |
| SMYD4     | 7.96E-04 | -0.6074 | 0.667 | 0.82 | 1 | MS.Trt_vs_MS.NoTrt_B |
| GDE1      | 7.96E-04 | -1.2399 | 0.172 | 0.29 | 1 | MS.Trt_vs_MS.NoTrt_B |
| PQBP1     | 7.97E-04 | -0.5932 | 0.102 | 0.2  | 1 | MS.Trt_vs_MS.NoTrt_B |
| SNRNP70   | 7.99E-04 | -0.4127 | 0.161 | 0.28 | 1 | MS.Trt_vs_MS.NoTrt_B |
| FLOT2     | 8.01E-04 | -0.3286 | 0.285 | 0.42 | 1 | MS.Trt_vs_MS.NoTrt_B |
| TMEM109   | 8.08E-04 | -0.3952 | 0.12  | 0.23 | 1 | MS.Trt_vs_MS.NoTrt_B |
| CHMP2A    | 8.10E-04 | -0.5847 | 0.076 | 0.16 | 1 | MS.Trt_vs_MS.NoTrt_B |
| PTP4A2    | 8.14E-04 | 0.3733  | 0.44  | 0.6  | 1 | MS.Trt_vs_MS.NoTrt_B |
| NUCKS1    | 8.19E-04 | 0.58189 | 0.388 | 0.55 | 1 | MS.Trt_vs_MS.NoTrt_B |
| GTF3C5    | 8.28E-04 | -0.9692 | 0.209 | 0.32 | 1 | MS.Trt_vs_MS.NoTrt_B |
| TCIRG1    | 8.29E-04 | -0.3491 | 0.218 | 0.34 | 1 | MS.Trt_vs_MS.NoTrt_B |
| SLC26A11  | 8.35E-04 | -0.6612 | 0.54  | 0.71 | 1 | MS.Trt_vs_MS.NoTrt_B |
| QDPR      | 8.36E-04 | -0.8015 | 0.039 | 0.11 | 1 | MS.Trt_vs_MS.NoTrt_B |
| PTPN18    | 8.37E-04 | 0.91667 | 0.24  | 0.4  | 1 | MS.Trt_vs_MS.NoTrt_B |
| SPPL3     | 8.47E-04 | -0.4982 | 0.447 | 0.62 | 1 | MS.Trt_vs_MS.NoTrt_B |
| ZNF496    | 8.49E-04 | 0.44547 | 0.481 | 0.67 | 1 | MS.Trt_vs_MS.NoTrt_B |
| TSTD1     | 8.51E-04 | 0.3281  | 0.166 | 0.3  | 1 | MS.Trt_vs_MS.NoTrt_B |
| VAMP1     | 8.52E-04 | -0.2681 | 0.118 | 0.22 | 1 | MS.Trt_vs_MS.NoTrt_B |
| USP32     | 8.53E-04 | 0.41971 | 0.179 | 0.29 | 1 | MS.Trt_vs_MS.NoTrt_B |
| POR       | 8.59E-04 | -0.3773 | 0.227 | 0.35 | 1 | MS.Trt_vs_MS.NoTrt_B |
| EIF2D     | 8.59E-04 | 0.51479 | 0.571 | 0.75 | 1 | MS.Trt_vs_MS.NoTrt_B |
| CENPC     | 8.60E-04 | 0.46535 | 0.468 | 0.6  | 1 | MS.Trt_vs_MS.NoTrt_B |
| RSBN1L    | 8.60E-04 | 0.35523 | 0.697 | 0.84 | 1 | MS.Trt_vs_MS.NoTrt_B |
| RTKN2     | 8.60E-04 | 0.29708 | 0.44  | 0.58 | 1 | MS.Trt_vs_MS.NoTrt_B |
| GSTM2     | 8.63E-04 | 0.59523 | 0.277 | 0.44 | 1 | MS.Trt_vs_MS.NoTrt_B |
| TNFRSF10B | 8.70E-04 | -0.8113 | 0.34  | 0.48 | 1 | MS.Trt_vs_MS.NoTrt_B |
| PARD6B    | 8.72E-04 | 0.32075 | 0.364 | 0.51 | 1 | MS.Trt_vs_MS.NoTrt_B |
| OLFM2     | 8.77E-04 | 0.30861 | 0.039 | 0.11 | 1 | MS.Trt_vs_MS.NoTrt_B |

|          |          |         |       |      |                        |
|----------|----------|---------|-------|------|------------------------|
| PGAM1    | 8.80E-04 | -0.2777 | 0.187 | 0.3  | 1 MS.Trt_vs_MS.NoTrt_B |
| USP14    | 8.82E-04 | -0.4662 | 0.473 | 0.65 | 1 MS.Trt_vs_MS.NoTrt_B |
| GIPR     | 8.84E-04 | 0.48649 | 0.527 | 0.69 | 1 MS.Trt_vs_MS.NoTrt_B |
| EZH2     | 8.85E-04 | -0.695  | 0.085 | 0.17 | 1 MS.Trt_vs_MS.NoTrt_B |
| CSRP2    | 8.90E-04 | -0.4638 | 0.379 | 0.56 | 1 MS.Trt_vs_MS.NoTrt_B |
| CLUAP1   | 8.90E-04 | 0.3305  | 0.68  | 0.87 | 1 MS.Trt_vs_MS.NoTrt_B |
| HSPA9    | 8.92E-04 | -0.5085 | 0.303 | 0.43 | 1 MS.Trt_vs_MS.NoTrt_B |
| PUM2     | 8.93E-04 | -0.327  | 0.233 | 0.36 | 1 MS.Trt_vs_MS.NoTrt_B |
| VPS13A   | 8.97E-04 | 0.53839 | 0.218 | 0.36 | 1 MS.Trt_vs_MS.NoTrt_B |
| NPAT     | 9.01E-04 | 0.6319  | 0.619 | 0.79 | 1 MS.Trt_vs_MS.NoTrt_B |
| SIRT2    | 9.07E-04 | -0.717  | 0.808 | 0.91 | 1 MS.Trt_vs_MS.NoTrt_B |
| RPIA     | 9.09E-04 | -0.6128 | 0.061 | 0.14 | 1 MS.Trt_vs_MS.NoTrt_B |
| BCL7C    | 9.15E-04 | -0.4219 | 0.39  | 0.56 | 1 MS.Trt_vs_MS.NoTrt_B |
| FAM149B1 | 9.18E-04 | 0.65003 | 0.129 | 0.24 | 1 MS.Trt_vs_MS.NoTrt_B |
| KIAA0930 | 9.24E-04 | -0.2828 | 0.481 | 0.65 | 1 MS.Trt_vs_MS.NoTrt_B |
| ZSCAN2   | 9.25E-04 | -0.5532 | 0.614 | 0.82 | 1 MS.Trt_vs_MS.NoTrt_B |
| TNFRSF4  | 9.26E-04 | -0.5267 | 0.076 | 0.16 | 1 MS.Trt_vs_MS.NoTrt_B |
| KXD1     | 9.29E-04 | -0.3874 | 0.706 | 0.8  | 1 MS.Trt_vs_MS.NoTrt_B |
| ZNF567   | 9.32E-04 | -0.4063 | 0.688 | 0.88 | 1 MS.Trt_vs_MS.NoTrt_B |
| TTC37    | 9.34E-04 | -0.275  | 0.272 | 0.41 | 1 MS.Trt_vs_MS.NoTrt_B |
| AP1S3    | 9.36E-04 | -0.2885 | 0.791 | 0.93 | 1 MS.Trt_vs_MS.NoTrt_B |
| RORC     | 9.40E-04 | -1.1597 | 0.044 | 0.11 | 1 MS.Trt_vs_MS.NoTrt_B |
| CAPNS1   | 9.43E-04 | 0.53034 | 0.22  | 0.35 | 1 MS.Trt_vs_MS.NoTrt_B |
| NUP153   | 9.48E-04 | 0.27502 | 0.129 | 0.24 | 1 MS.Trt_vs_MS.NoTrt_B |
| C1orf162 | 9.51E-04 | -0.5056 | 0.061 | 0.14 | 1 MS.Trt_vs_MS.NoTrt_B |
| ZNF442   | 9.53E-04 | -0.3339 | 0.573 | 0.76 | 1 MS.Trt_vs_MS.NoTrt_B |
| SLC25A12 | 9.54E-04 | -0.9501 | 0.059 | 0.14 | 1 MS.Trt_vs_MS.NoTrt_B |
| MUL1     | 9.56E-04 | -0.5868 | 0.037 | 0.1  | 1 MS.Trt_vs_MS.NoTrt_B |
| HACD3    | 9.56E-04 | 0.48476 | 0.58  | 0.8  | 1 MS.Trt_vs_MS.NoTrt_B |
| B4GALT4  | 9.59E-04 | -0.5549 | 0.484 | 0.63 | 1 MS.Trt_vs_MS.NoTrt_B |
| CDON     | 9.61E-04 | -0.2853 | 0.349 | 0.49 | 1 MS.Trt_vs_MS.NoTrt_B |
| MPP7     | 9.62E-04 | -0.8412 | 0.161 | 0.27 | 1 MS.Trt_vs_MS.NoTrt_B |
| ABHD14A  | 9.67E-04 | -0.7082 | 0.401 | 0.51 | 1 MS.Trt_vs_MS.NoTrt_B |
| CCDC94   | 9.68E-04 | -0.3885 | 0.1   | 0.2  | 1 MS.Trt_vs_MS.NoTrt_B |
| BIRC6    | 9.69E-04 | 0.40407 | 0.316 | 0.48 | 1 MS.Trt_vs_MS.NoTrt_B |
| ACAD10   | 9.86E-04 | 0.31317 | 0.344 | 0.49 | 1 MS.Trt_vs_MS.NoTrt_B |
| BRPF1    | 9.86E-04 | -0.6215 | 0.044 | 0.11 | 1 MS.Trt_vs_MS.NoTrt_B |
| SRRT     | 9.87E-04 | -0.3548 | 0.135 | 0.24 | 1 MS.Trt_vs_MS.NoTrt_B |
| USP37    | 9.88E-04 | 0.43616 | 0.312 | 0.45 | 1 MS.Trt_vs_MS.NoTrt_B |
| ABHD5    | 9.91E-04 | 0.43103 | 0.078 | 0.17 | 1 MS.Trt_vs_MS.NoTrt_B |

|          |          |         |       |      |   |                      |
|----------|----------|---------|-------|------|---|----------------------|
| NAGK     | 9.91E-04 | -0.3801 | 0.647 | 0.84 | 1 | MS.Trt_vs_MS.NoTrt_B |
| METTL9   | 9.93E-04 | -0.4139 | 0.427 | 0.58 | 1 | MS.Trt_vs_MS.NoTrt_B |
| PGM1     | 9.93E-04 | -0.869  | 0.054 | 0.13 | 1 | MS.Trt_vs_MS.NoTrt_B |
| C10orf67 | 9.97E-04 | -0.7169 | 0.15  | 0.26 | 1 | MS.Trt_vs_MS.NoTrt_B |
| FKBP15   | 9.99E-04 | -1.089  | 0.059 | 0.14 | 1 | MS.Trt_vs_MS.NoTrt_B |
| LAMP1    | 9.99E-04 | -0.424  | 0.251 | 0.37 | 1 | MS.Trt_vs_MS.NoTrt_B |
| BTBD11   | 0.001    | 0.9407  | 0.338 | 0.53 | 1 | MS.Trt_vs_MS.NoTrt_B |
| LIN52    | 0.00101  | -0.2801 | 0.566 | 0.7  | 1 | MS.Trt_vs_MS.NoTrt_B |
| CDC14A   | 0.00101  | 0.8312  | 0.144 | 0.26 | 1 | MS.Trt_vs_MS.NoTrt_B |
| PRPF40A  | 0.00101  | 0.49895 | 0.322 | 0.48 | 1 | MS.Trt_vs_MS.NoTrt_B |
| TRMT61B  | 0.00102  | 0.2653  | 0.096 | 0.19 | 1 | MS.Trt_vs_MS.NoTrt_B |
| MAP4K5   | 0.00103  | 0.3417  | 0.364 | 0.53 | 1 | MS.Trt_vs_MS.NoTrt_B |
| SLC35G1  | 0.00104  | -0.3551 | 0.068 | 0.15 | 1 | MS.Trt_vs_MS.NoTrt_B |
| C8orf33  | 0.00104  | -1.1153 | 0.124 | 0.23 | 1 | MS.Trt_vs_MS.NoTrt_B |
| CARHSP1  | 0.00104  | -0.454  | 0.536 | 0.66 | 1 | MS.Trt_vs_MS.NoTrt_B |
| TROAP    | 0.00104  | -0.4394 | 0.338 | 0.51 | 1 | MS.Trt_vs_MS.NoTrt_B |
| ING3     | 0.00104  | -0.2617 | 0.1   | 0.2  | 1 | MS.Trt_vs_MS.NoTrt_B |
| KRTCAP2  | 0.00105  | 0.27014 | 0.623 | 0.8  | 1 | MS.Trt_vs_MS.NoTrt_B |
| ANKEF1   | 0.00105  | 0.6184  | 0.137 | 0.25 | 1 | MS.Trt_vs_MS.NoTrt_B |
| TCFL5    | 0.00105  | -0.8576 | 0.416 | 0.54 | 1 | MS.Trt_vs_MS.NoTrt_B |
| AKAP2    | 0.00106  | -0.5391 | 0.198 | 0.32 | 1 | MS.Trt_vs_MS.NoTrt_B |
| A2M      | 0.00106  | 1.38854 | 0.157 | 0.06 | 1 | MS.Trt_vs_MS.NoTrt_B |
| NT5C     | 0.00107  | -0.3379 | 0.102 | 0.2  | 1 | MS.Trt_vs_MS.NoTrt_B |
| ALG9     | 0.00108  | -0.7128 | 0.712 | 0.86 | 1 | MS.Trt_vs_MS.NoTrt_B |
| MOB2     | 0.00108  | -0.779  | 0.048 | 0.12 | 1 | MS.Trt_vs_MS.NoTrt_B |
| TAB3     | 0.00108  | 0.45413 | 0.558 | 0.76 | 1 | MS.Trt_vs_MS.NoTrt_B |
| KRBA2    | 0.00108  | 0.78948 | 0.259 | 0.41 | 1 | MS.Trt_vs_MS.NoTrt_B |
| NPIP3    | 0.00108  | 0.43671 | 0.516 | 0.7  | 1 | MS.Trt_vs_MS.NoTrt_B |
| PSMC1    | 0.00109  | 0.26482 | 0.316 | 0.44 | 1 | MS.Trt_vs_MS.NoTrt_B |
| RAD51C   | 0.0011   | -0.2569 | 0.789 | 0.94 | 1 | MS.Trt_vs_MS.NoTrt_B |
| ANKIB1   | 0.0011   | 0.63994 | 0.24  | 0.37 | 1 | MS.Trt_vs_MS.NoTrt_B |
| TPP2     | 0.00111  | -0.3021 | 0.412 | 0.52 | 1 | MS.Trt_vs_MS.NoTrt_B |
| LNPK     | 0.00111  | 0.26079 | 0.41  | 0.55 | 1 | MS.Trt_vs_MS.NoTrt_B |
| LCMT2    | 0.00111  | -0.8271 | 0.538 | 0.61 | 1 | MS.Trt_vs_MS.NoTrt_B |
| SPCS2    | 0.00111  | 0.26549 | 0.229 | 0.36 | 1 | MS.Trt_vs_MS.NoTrt_B |
| KRIT1    | 0.00112  | -0.4949 | 0.499 | 0.67 | 1 | MS.Trt_vs_MS.NoTrt_B |
| MRPL24   | 0.00112  | -0.3975 | 0.065 | 0.15 | 1 | MS.Trt_vs_MS.NoTrt_B |
| FHOD1    | 0.00113  | -0.594  | 0.076 | 0.16 | 1 | MS.Trt_vs_MS.NoTrt_B |
| EIF2S1   | 0.00114  | 0.29602 | 0.233 | 0.36 | 1 | MS.Trt_vs_MS.NoTrt_B |
| ACTR3C   | 0.00114  | -0.5333 | 0.42  | 0.55 | 1 | MS.Trt_vs_MS.NoTrt_B |

|          |         |         |       |      |   |                      |
|----------|---------|---------|-------|------|---|----------------------|
| TJAP1    | 0.00114 | 0.75502 | 0.253 | 0.38 | 1 | MS.Trt_vs_MS.NoTrt_B |
| HNRNPL   | 0.00114 | 0.33602 | 0.739 | 0.78 | 1 | MS.Trt_vs_MS.NoTrt_B |
| RGPD6    | 0.00115 | 0.46162 | 0.383 | 0.56 | 1 | MS.Trt_vs_MS.NoTrt_B |
| DLST     | 0.00115 | -0.3829 | 0.793 | 0.95 | 1 | MS.Trt_vs_MS.NoTrt_B |
| PLEKHA2  | 0.00115 | -0.2567 | 0.68  | 0.77 | 1 | MS.Trt_vs_MS.NoTrt_B |
| MFGE8    | 0.00116 | 0.33072 | 0.383 | 0.54 | 1 | MS.Trt_vs_MS.NoTrt_B |
| MAPK1    | 0.00116 | 0.70139 | 0.392 | 0.55 | 1 | MS.Trt_vs_MS.NoTrt_B |
| ARHGEF9  | 0.00116 | -0.5517 | 0.423 | 0.55 | 1 | MS.Trt_vs_MS.NoTrt_B |
| SIAE     | 0.00116 | -0.5601 | 0.49  | 0.67 | 1 | MS.Trt_vs_MS.NoTrt_B |
| RRP7A    | 0.00117 | 0.34345 | 0.39  | 0.55 | 1 | MS.Trt_vs_MS.NoTrt_B |
| CELF1    | 0.00117 | -0.3665 | 0.309 | 0.44 | 1 | MS.Trt_vs_MS.NoTrt_B |
| SERPINH1 | 0.00117 | -0.2854 | 0.224 | 0.36 | 1 | MS.Trt_vs_MS.NoTrt_B |
| GOLGA8A  | 0.00118 | 0.62736 | 0.314 | 0.47 | 1 | MS.Trt_vs_MS.NoTrt_B |
| PIGT     | 0.00119 | -0.9271 | 0.057 | 0.13 | 1 | MS.Trt_vs_MS.NoTrt_B |
| ABHD10   | 0.00119 | -0.5716 | 0.052 | 0.12 | 1 | MS.Trt_vs_MS.NoTrt_B |
| ATP6V1C1 | 0.00119 | -0.2602 | 0.309 | 0.45 | 1 | MS.Trt_vs_MS.NoTrt_B |
| RRNAD1   | 0.00119 | 0.26573 | 0.497 | 0.67 | 1 | MS.Trt_vs_MS.NoTrt_B |
| FBXO45   | 0.0012  | 0.89049 | 0.303 | 0.44 | 1 | MS.Trt_vs_MS.NoTrt_B |
| TBC1D20  | 0.0012  | 0.73685 | 0.447 | 0.63 | 1 | MS.Trt_vs_MS.NoTrt_B |
| MAL      | 0.00122 | -0.2676 | 0.222 | 0.35 | 1 | MS.Trt_vs_MS.NoTrt_B |
| MRPS16   | 0.00122 | -0.2888 | 0.647 | 0.79 | 1 | MS.Trt_vs_MS.NoTrt_B |
| DET1     | 0.00122 | 0.59961 | 0.355 | 0.5  | 1 | MS.Trt_vs_MS.NoTrt_B |
| LUC7L2   | 0.00122 | 0.37807 | 0.418 | 0.56 | 1 | MS.Trt_vs_MS.NoTrt_B |
| ECHDC1   | 0.00122 | 0.85787 | 0.688 | 0.9  | 1 | MS.Trt_vs_MS.NoTrt_B |
| EIF4E3   | 0.00122 | 0.82846 | 0.144 | 0.26 | 1 | MS.Trt_vs_MS.NoTrt_B |
| N4BP2    | 0.00124 | 0.55866 | 0.259 | 0.4  | 1 | MS.Trt_vs_MS.NoTrt_B |
| KPNB1    | 0.00124 | 0.38656 | 0.523 | 0.69 | 1 | MS.Trt_vs_MS.NoTrt_B |
| ELMOD3   | 0.00124 | -0.2994 | 0.745 | 0.86 | 1 | MS.Trt_vs_MS.NoTrt_B |
| SCML4    | 0.00124 | 0.35118 | 0.46  | 0.64 | 1 | MS.Trt_vs_MS.NoTrt_B |
| UTP23    | 0.00124 | -0.3109 | 0.418 | 0.56 | 1 | MS.Trt_vs_MS.NoTrt_B |
| MSH6     | 0.00125 | 0.2907  | 0.704 | 0.86 | 1 | MS.Trt_vs_MS.NoTrt_B |
| ALKBH7   | 0.00125 | -0.4875 | 0.096 | 0.19 | 1 | MS.Trt_vs_MS.NoTrt_B |
| ADTRP    | 0.00125 | 0.26563 | 0.272 | 0.4  | 1 | MS.Trt_vs_MS.NoTrt_B |
| NRL      | 0.00126 | -0.4725 | 0.037 | 0.1  | 1 | MS.Trt_vs_MS.NoTrt_B |
| ABLIM3   | 0.00126 | 0.45722 | 0.102 | 0.03 | 1 | MS.Trt_vs_MS.NoTrt_B |
| SLC17A5  | 0.00127 | -0.7705 | 0.349 | 0.51 | 1 | MS.Trt_vs_MS.NoTrt_B |
| GIT1     | 0.00127 | -0.8284 | 0.126 | 0.22 | 1 | MS.Trt_vs_MS.NoTrt_B |
| RDH5     | 0.00127 | -0.5621 | 0.373 | 0.51 | 1 | MS.Trt_vs_MS.NoTrt_B |
| CD109    | 0.00127 | -0.4074 | 0.237 | 0.36 | 1 | MS.Trt_vs_MS.NoTrt_B |
| UBE3D    | 0.00127 | 0.68392 | 0.442 | 0.63 | 1 | MS.Trt_vs_MS.NoTrt_B |

|          |         |         |       |      |                        |
|----------|---------|---------|-------|------|------------------------|
| SLC25A46 | 0.00127 | -0.5394 | 0.052 | 0.12 | 1 MS.Trt_vs_MS.NoTrt_B |
| SLC9A9   | 0.00127 | -0.4335 | 0.089 | 0.18 | 1 MS.Trt_vs_MS.NoTrt_B |
| POP4     | 0.00129 | -0.3257 | 0.089 | 0.18 | 1 MS.Trt_vs_MS.NoTrt_B |
| SLC6A6   | 0.00129 | -0.5563 | 0.096 | 0.19 | 1 MS.Trt_vs_MS.NoTrt_B |
| ATP5L    | 0.00129 | 0.37841 | 0.373 | 0.55 | 1 MS.Trt_vs_MS.NoTrt_B |
| MLH1     | 0.00129 | -0.8398 | 0.246 | 0.38 | 1 MS.Trt_vs_MS.NoTrt_B |
| MICAL1   | 0.00129 | -0.339  | 0.185 | 0.3  | 1 MS.Trt_vs_MS.NoTrt_B |
| SETMAR   | 0.0013  | -0.4605 | 0.251 | 0.38 | 1 MS.Trt_vs_MS.NoTrt_B |
| ZNF699   | 0.0013  | 0.63801 | 0.181 | 0.29 | 1 MS.Trt_vs_MS.NoTrt_B |
| NR2C2    | 0.0013  | 0.42675 | 0.521 | 0.71 | 1 MS.Trt_vs_MS.NoTrt_B |
| TAF1D    | 0.0013  | 0.26238 | 0.405 | 0.55 | 1 MS.Trt_vs_MS.NoTrt_B |
| RPH3AL   | 0.00131 | -0.9111 | 0.209 | 0.33 | 1 MS.Trt_vs_MS.NoTrt_B |
| KALRN    | 0.00131 | -0.2874 | 0.222 | 0.36 | 1 MS.Trt_vs_MS.NoTrt_B |
| USP48    | 0.00132 | 0.27838 | 0.39  | 0.54 | 1 MS.Trt_vs_MS.NoTrt_B |
| VPS29    | 0.00133 | 0.34176 | 0.41  | 0.54 | 1 MS.Trt_vs_MS.NoTrt_B |
| IFT46    | 0.00133 | -0.7804 | 0.15  | 0.25 | 1 MS.Trt_vs_MS.NoTrt_B |
| GEN1     | 0.00134 | 0.42432 | 0.58  | 0.77 | 1 MS.Trt_vs_MS.NoTrt_B |
| SLC16A6  | 0.00134 | 0.9227  | 0.209 | 0.34 | 1 MS.Trt_vs_MS.NoTrt_B |
| FARS2    | 0.00134 | -0.4544 | 0.074 | 0.16 | 1 MS.Trt_vs_MS.NoTrt_B |
| ZNF497   | 0.00135 | -1.1871 | 0.205 | 0.33 | 1 MS.Trt_vs_MS.NoTrt_B |
| ZNF790   | 0.00135 | -0.8289 | 0.381 | 0.52 | 1 MS.Trt_vs_MS.NoTrt_B |
| EXPH5    | 0.00136 | 0.35958 | 0.556 | 0.71 | 1 MS.Trt_vs_MS.NoTrt_B |
| TMEM25   | 0.00136 | -0.7794 | 0.253 | 0.41 | 1 MS.Trt_vs_MS.NoTrt_B |
| MRPL42   | 0.00136 | 0.31302 | 0.891 | 0.98 | 1 MS.Trt_vs_MS.NoTrt_B |
| OGFOD2   | 0.00136 | -0.4312 | 0.076 | 0.16 | 1 MS.Trt_vs_MS.NoTrt_B |
| ZNF563   | 0.00137 | -0.8533 | 0.423 | 0.59 | 1 MS.Trt_vs_MS.NoTrt_B |
| MICU1    | 0.00137 | -0.2734 | 0.529 | 0.64 | 1 MS.Trt_vs_MS.NoTrt_B |
| PTPMT1   | 0.00137 | -0.396  | 0.085 | 0.17 | 1 MS.Trt_vs_MS.NoTrt_B |
| TCAIM    | 0.00137 | 1.40633 | 0.153 | 0.27 | 1 MS.Trt_vs_MS.NoTrt_B |
| AMMECR1  | 0.00137 | -0.3451 | 0.092 | 0.18 | 1 MS.Trt_vs_MS.NoTrt_B |
| PTEN     | 0.00138 | 0.3993  | 0.447 | 0.61 | 1 MS.Trt_vs_MS.NoTrt_B |
| SCAMP3   | 0.00139 | -0.5413 | 0.139 | 0.24 | 1 MS.Trt_vs_MS.NoTrt_B |
| ZNF654   | 0.00139 | -0.8471 | 0.072 | 0.15 | 1 MS.Trt_vs_MS.NoTrt_B |
| PWWP2A   | 0.0014  | 0.36957 | 0.102 | 0.2  | 1 MS.Trt_vs_MS.NoTrt_B |
| IMPA1    | 0.0014  | 0.46564 | 0.216 | 0.34 | 1 MS.Trt_vs_MS.NoTrt_B |
| SGMS1    | 0.00141 | -0.2657 | 0.159 | 0.27 | 1 MS.Trt_vs_MS.NoTrt_B |
| LUC7L3   | 0.00141 | 0.43057 | 0.514 | 0.72 | 1 MS.Trt_vs_MS.NoTrt_B |
| TSTD2    | 0.00141 | -0.449  | 0.057 | 0.13 | 1 MS.Trt_vs_MS.NoTrt_B |
| METTL6   | 0.00141 | -0.3883 | 0.778 | 0.93 | 1 MS.Trt_vs_MS.NoTrt_B |
| VPS35    | 0.00141 | 0.29205 | 0.425 | 0.55 | 1 MS.Trt_vs_MS.NoTrt_B |

|            |         |         |       |      |   |                      |
|------------|---------|---------|-------|------|---|----------------------|
| MSANTD1    | 0.00142 | 0.75475 | 0.349 | 0.48 | 1 | MS.Trt_vs_MS.NoTrt_B |
| SMAD3      | 0.00142 | -0.4423 | 0.094 | 0.18 | 1 | MS.Trt_vs_MS.NoTrt_B |
| PDCD10     | 0.00142 | 0.25212 | 0.166 | 0.28 | 1 | MS.Trt_vs_MS.NoTrt_B |
| AEBP2      | 0.00142 | 0.7706  | 0.532 | 0.7  | 1 | MS.Trt_vs_MS.NoTrt_B |
| ZER1       | 0.00142 | -0.3271 | 0.098 | 0.19 | 1 | MS.Trt_vs_MS.NoTrt_B |
| NADSYN1    | 0.00142 | 0.43386 | 0.453 | 0.61 | 1 | MS.Trt_vs_MS.NoTrt_B |
| FAM96B     | 0.00143 | 0.40577 | 0.161 | 0.29 | 1 | MS.Trt_vs_MS.NoTrt_B |
| GALK1      | 0.00145 | -0.3542 | 0.218 | 0.34 | 1 | MS.Trt_vs_MS.NoTrt_B |
| AP1S2      | 0.00146 | 0.33198 | 0.135 | 0.24 | 1 | MS.Trt_vs_MS.NoTrt_B |
| CXCR6      | 0.00146 | -1.4527 | 0.092 | 0.18 | 1 | MS.Trt_vs_MS.NoTrt_B |
| TEX261     | 0.00146 | -0.4497 | 0.039 | 0.1  | 1 | MS.Trt_vs_MS.NoTrt_B |
| PPCS       | 0.00146 | 0.49844 | 0.255 | 0.38 | 1 | MS.Trt_vs_MS.NoTrt_B |
| SFXN3      | 0.00146 | -1.1382 | 0.237 | 0.35 | 1 | MS.Trt_vs_MS.NoTrt_B |
| LRP2BP     | 0.00147 | -0.6422 | 0.353 | 0.47 | 1 | MS.Trt_vs_MS.NoTrt_B |
| GRSF1      | 0.00148 | -0.4375 | 0.617 | 0.74 | 1 | MS.Trt_vs_MS.NoTrt_B |
| RTEL1      | 0.00148 | -0.689  | 0.057 | 0.13 | 1 | MS.Trt_vs_MS.NoTrt_B |
| SYNGR2     | 0.00148 | 0.28015 | 0.455 | 0.6  | 1 | MS.Trt_vs_MS.NoTrt_B |
| EIF2AK4    | 0.00149 | 0.33302 | 0.495 | 0.67 | 1 | MS.Trt_vs_MS.NoTrt_B |
| CNPPD1     | 0.0015  | -0.3747 | 0.198 | 0.31 | 1 | MS.Trt_vs_MS.NoTrt_B |
| RP11-343C2 | 0.0015  | -0.4434 | 0.089 | 0.18 | 1 | MS.Trt_vs_MS.NoTrt_B |
| THOC6      | 0.00151 | -0.4914 | 0.046 | 0.11 | 1 | MS.Trt_vs_MS.NoTrt_B |
| TOX        | 0.00151 | -0.4402 | 0.179 | 0.29 | 1 | MS.Trt_vs_MS.NoTrt_B |
| EIF3B      | 0.00152 | 0.70198 | 0.281 | 0.43 | 1 | MS.Trt_vs_MS.NoTrt_B |
| ICE2       | 0.00153 | 0.44418 | 0.769 | 0.87 | 1 | MS.Trt_vs_MS.NoTrt_B |
| RDH10      | 0.00153 | 0.99338 | 0.131 | 0.24 | 1 | MS.Trt_vs_MS.NoTrt_B |
| MREG       | 0.00154 | 0.40706 | 0.497 | 0.69 | 1 | MS.Trt_vs_MS.NoTrt_B |
| IMMT       | 0.00154 | 0.38231 | 0.34  | 0.48 | 1 | MS.Trt_vs_MS.NoTrt_B |
| DCLRE1C    | 0.00154 | 0.69647 | 0.51  | 0.66 | 1 | MS.Trt_vs_MS.NoTrt_B |
| C16orf70   | 0.00155 | 0.62535 | 0.508 | 0.68 | 1 | MS.Trt_vs_MS.NoTrt_B |
| RBM43      | 0.00156 | -0.3788 | 0.481 | 0.68 | 1 | MS.Trt_vs_MS.NoTrt_B |
| EXD3       | 0.00157 | -0.4156 | 0.373 | 0.51 | 1 | MS.Trt_vs_MS.NoTrt_B |
| PRDX3      | 0.00158 | 0.54355 | 0.37  | 0.51 | 1 | MS.Trt_vs_MS.NoTrt_B |
| C17orf89   | 0.00158 | -0.4416 | 0.059 | 0.14 | 1 | MS.Trt_vs_MS.NoTrt_B |
| ALG1       | 0.00158 | 0.25931 | 0.492 | 0.65 | 1 | MS.Trt_vs_MS.NoTrt_B |
| GPX7       | 0.00158 | -0.6893 | 0.039 | 0.1  | 1 | MS.Trt_vs_MS.NoTrt_B |
| TRIM5      | 0.00159 | -0.8203 | 0.364 | 0.51 | 1 | MS.Trt_vs_MS.NoTrt_B |
| RNPC3      | 0.0016  | 0.6319  | 0.301 | 0.48 | 1 | MS.Trt_vs_MS.NoTrt_B |
| BHLHB9     | 0.00161 | 0.35456 | 0.224 | 0.35 | 1 | MS.Trt_vs_MS.NoTrt_B |
| CUL5       | 0.00163 | 0.35237 | 0.161 | 0.27 | 1 | MS.Trt_vs_MS.NoTrt_B |
| VPS37A     | 0.00164 | -0.8575 | 0.105 | 0.2  | 1 | MS.Trt_vs_MS.NoTrt_B |

|          |         |         |       |      |                        |
|----------|---------|---------|-------|------|------------------------|
| KLF13    | 0.00164 | 0.43249 | 0.222 | 0.35 | 1 MS.Trt_vs_MS.NoTrt_B |
| RBBP9    | 0.00164 | -1.0993 | 0.233 | 0.35 | 1 MS.Trt_vs_MS.NoTrt_B |
| GNPAT    | 0.00165 | -0.4388 | 0.1   | 0.19 | 1 MS.Trt_vs_MS.NoTrt_B |
| XPO5     | 0.00165 | -0.4915 | 0.538 | 0.72 | 1 MS.Trt_vs_MS.NoTrt_B |
| TRIM24   | 0.00165 | 0.57736 | 0.331 | 0.47 | 1 MS.Trt_vs_MS.NoTrt_B |
| INTS9    | 0.00166 | -0.6885 | 0.061 | 0.14 | 1 MS.Trt_vs_MS.NoTrt_B |
| TMEM65   | 0.00166 | 0.42975 | 0.536 | 0.72 | 1 MS.Trt_vs_MS.NoTrt_B |
| PPP6R3   | 0.00167 | 0.25652 | 0.366 | 0.52 | 1 MS.Trt_vs_MS.NoTrt_B |
| MFSD13A  | 0.00167 | -0.4819 | 0.584 | 0.73 | 1 MS.Trt_vs_MS.NoTrt_B |
| P2RX7    | 0.00167 | -0.2587 | 0.586 | 0.75 | 1 MS.Trt_vs_MS.NoTrt_B |
| CASP2    | 0.00167 | 0.45871 | 0.732 | 0.87 | 1 MS.Trt_vs_MS.NoTrt_B |
| RBM48    | 0.00168 | 0.52384 | 0.614 | 0.81 | 1 MS.Trt_vs_MS.NoTrt_B |
| TANGO2   | 0.00169 | -0.949  | 0.765 | 0.85 | 1 MS.Trt_vs_MS.NoTrt_B |
| DRG2     | 0.00169 | -0.2857 | 0.17  | 0.28 | 1 MS.Trt_vs_MS.NoTrt_B |
| NEMP1    | 0.00169 | -0.7904 | 0.044 | 0.11 | 1 MS.Trt_vs_MS.NoTrt_B |
| EPPK1    | 0.0017  | -0.3819 | 0.057 | 0.13 | 1 MS.Trt_vs_MS.NoTrt_B |
| KLF8     | 0.0017  | -0.3994 | 0.619 | 0.72 | 1 MS.Trt_vs_MS.NoTrt_B |
| ACTA2    | 0.0017  | -0.5252 | 0.477 | 0.6  | 1 MS.Trt_vs_MS.NoTrt_B |
| GON4L    | 0.00171 | 0.4775  | 0.71  | 0.89 | 1 MS.Trt_vs_MS.NoTrt_B |
| BTG2     | 0.00171 | -0.5769 | 0.089 | 0.17 | 1 MS.Trt_vs_MS.NoTrt_B |
| ABCF3    | 0.00171 | -0.8365 | 0.113 | 0.2  | 1 MS.Trt_vs_MS.NoTrt_B |
| AKT3     | 0.00171 | 0.45059 | 0.521 | 0.7  | 1 MS.Trt_vs_MS.NoTrt_B |
| FBXO44   | 0.00173 | -0.2716 | 0.473 | 0.63 | 1 MS.Trt_vs_MS.NoTrt_B |
| HSD17B10 | 0.00173 | -0.4402 | 0.083 | 0.17 | 1 MS.Trt_vs_MS.NoTrt_B |
| NBEAL1   | 0.00173 | 0.28145 | 0.782 | 0.89 | 1 MS.Trt_vs_MS.NoTrt_B |
| TXNDC12  | 0.00173 | -0.3483 | 0.111 | 0.21 | 1 MS.Trt_vs_MS.NoTrt_B |
| CYP4F11  | 0.00174 | -0.315  | 0.275 | 0.39 | 1 MS.Trt_vs_MS.NoTrt_B |
| COG4     | 0.00174 | -0.3594 | 0.597 | 0.72 | 1 MS.Trt_vs_MS.NoTrt_B |
| SH3GLB1  | 0.00174 | -0.308  | 0.394 | 0.5  | 1 MS.Trt_vs_MS.NoTrt_B |
| QTRT1    | 0.00174 | 0.65056 | 0.656 | 0.82 | 1 MS.Trt_vs_MS.NoTrt_B |
| NAT6     | 0.00174 | -0.4756 | 0.039 | 0.1  | 1 MS.Trt_vs_MS.NoTrt_B |
| HSPA2    | 0.00174 | -0.3108 | 0.407 | 0.56 | 1 MS.Trt_vs_MS.NoTrt_B |
| IFT80    | 0.00175 | -0.2905 | 0.627 | 0.75 | 1 MS.Trt_vs_MS.NoTrt_B |
| ZNF391   | 0.00175 | -0.7171 | 0.122 | 0.22 | 1 MS.Trt_vs_MS.NoTrt_B |
| KLHDC4   | 0.00176 | 0.37342 | 0.588 | 0.7  | 1 MS.Trt_vs_MS.NoTrt_B |
| RBX1     | 0.00178 | 0.31262 | 0.237 | 0.37 | 1 MS.Trt_vs_MS.NoTrt_B |
| YARS     | 0.00178 | -0.5237 | 0.747 | 0.87 | 1 MS.Trt_vs_MS.NoTrt_B |
| HIKESHI  | 0.00179 | 0.25109 | 0.314 | 0.47 | 1 MS.Trt_vs_MS.NoTrt_B |
| NMD3     | 0.00179 | 0.29059 | 0.586 | 0.7  | 1 MS.Trt_vs_MS.NoTrt_B |
| STMN1    | 0.00179 | -0.7001 | 0.597 | 0.7  | 1 MS.Trt_vs_MS.NoTrt_B |



|          |         |         |       |      |   |                      |
|----------|---------|---------|-------|------|---|----------------------|
| 2-Mar    | 0.00181 | -1.1512 | 0.399 | 0.54 | 1 | MS.Trt_vs_MS.NoTrt_B |
| PLEKHG3  | 0.00181 | -1.0051 | 0.325 | 0.47 | 1 | MS.Trt_vs_MS.NoTrt_B |
| ATP6V1A  | 0.00182 | -0.8919 | 0.377 | 0.5  | 1 | MS.Trt_vs_MS.NoTrt_B |
| C5orf15  | 0.00183 | 0.4758  | 0.094 | 0.18 | 1 | MS.Trt_vs_MS.NoTrt_B |
| METTL10  | 0.00183 | 0.35336 | 0.253 | 0.37 | 1 | MS.Trt_vs_MS.NoTrt_B |
| PIGX     | 0.00183 | -0.6679 | 0.298 | 0.41 | 1 | MS.Trt_vs_MS.NoTrt_B |
| HMGN1    | 0.00183 | 0.45599 | 0.377 | 0.55 | 1 | MS.Trt_vs_MS.NoTrt_B |
| AHSA1    | 0.00184 | -0.5532 | 0.39  | 0.52 | 1 | MS.Trt_vs_MS.NoTrt_B |
| ATE1     | 0.00184 | -0.3372 | 0.218 | 0.34 | 1 | MS.Trt_vs_MS.NoTrt_B |
| P3H1     | 0.00185 | -0.6058 | 0.832 | 0.94 | 1 | MS.Trt_vs_MS.NoTrt_B |
| SLC41A3  | 0.00185 | -1.0603 | 0.196 | 0.31 | 1 | MS.Trt_vs_MS.NoTrt_B |
| RECQL    | 0.00187 | -0.4302 | 0.122 | 0.22 | 1 | MS.Trt_vs_MS.NoTrt_B |
| SUSD3    | 0.00187 | 0.26273 | 0.309 | 0.45 | 1 | MS.Trt_vs_MS.NoTrt_B |
| CBL      | 0.00187 | -0.3212 | 0.455 | 0.6  | 1 | MS.Trt_vs_MS.NoTrt_B |
| TCEAL4   | 0.00187 | -0.5031 | 0.089 | 0.17 | 1 | MS.Trt_vs_MS.NoTrt_B |
| DOPEY2   | 0.00188 | -0.5575 | 0.654 | 0.8  | 1 | MS.Trt_vs_MS.NoTrt_B |
| DCBLD2   | 0.00188 | 0.36171 | 0.521 | 0.7  | 1 | MS.Trt_vs_MS.NoTrt_B |
| ABCC1    | 0.00188 | 0.39004 | 0.285 | 0.41 | 1 | MS.Trt_vs_MS.NoTrt_B |
| GNPNAT1  | 0.00188 | 0.64419 | 0.401 | 0.58 | 1 | MS.Trt_vs_MS.NoTrt_B |
| MAN2A1   | 0.00189 | 0.33433 | 0.179 | 0.29 | 1 | MS.Trt_vs_MS.NoTrt_B |
| DSN1     | 0.00189 | -1.0574 | 0.2   | 0.31 | 1 | MS.Trt_vs_MS.NoTrt_B |
| MAML2    | 0.00189 | 0.34672 | 0.15  | 0.26 | 1 | MS.Trt_vs_MS.NoTrt_B |
| NUDCD3   | 0.0019  | -0.6271 | 0.264 | 0.37 | 1 | MS.Trt_vs_MS.NoTrt_B |
| TYK2     | 0.0019  | -0.3107 | 0.525 | 0.68 | 1 | MS.Trt_vs_MS.NoTrt_B |
| LRRC59   | 0.0019  | -0.9852 | 0.078 | 0.16 | 1 | MS.Trt_vs_MS.NoTrt_B |
| SIGMAR1  | 0.0019  | -0.4875 | 0.137 | 0.24 | 1 | MS.Trt_vs_MS.NoTrt_B |
| GOLGA8R  | 0.00191 | 0.3704  | 0.368 | 0.53 | 1 | MS.Trt_vs_MS.NoTrt_B |
| FASTKD1  | 0.00191 | -0.6792 | 0.161 | 0.27 | 1 | MS.Trt_vs_MS.NoTrt_B |
| AOAH     | 0.00191 | 0.66712 | 0.24  | 0.36 | 1 | MS.Trt_vs_MS.NoTrt_B |
| CHPT1    | 0.00191 | -0.3466 | 0.46  | 0.61 | 1 | MS.Trt_vs_MS.NoTrt_B |
| SLC35D1  | 0.00191 | 0.60628 | 0.216 | 0.35 | 1 | MS.Trt_vs_MS.NoTrt_B |
| SUSD6    | 0.00192 | 0.35438 | 0.218 | 0.34 | 1 | MS.Trt_vs_MS.NoTrt_B |
| GBAS     | 0.00194 | 0.32067 | 0.59  | 0.71 | 1 | MS.Trt_vs_MS.NoTrt_B |
| SLC39A14 | 0.00195 | -0.806  | 0.312 | 0.45 | 1 | MS.Trt_vs_MS.NoTrt_B |
| TUBGCP5  | 0.00195 | 0.29715 | 0.575 | 0.73 | 1 | MS.Trt_vs_MS.NoTrt_B |
| GNG5     | 0.00198 | 0.2853  | 0.185 | 0.32 | 1 | MS.Trt_vs_MS.NoTrt_B |
| DHX30    | 0.00199 | -0.7165 | 0.516 | 0.64 | 1 | MS.Trt_vs_MS.NoTrt_B |
| EFCAB13  | 0.00199 | -0.5053 | 0.209 | 0.33 | 1 | MS.Trt_vs_MS.NoTrt_B |
| CBX1     | 0.002   | -0.2622 | 0.179 | 0.29 | 1 | MS.Trt_vs_MS.NoTrt_B |
| ZBTB38   | 0.002   | 0.77388 | 0.471 | 0.61 | 1 | MS.Trt_vs_MS.NoTrt_B |

|         |         |         |       |      |                        |
|---------|---------|---------|-------|------|------------------------|
| FAAP100 | 0.00201 | -0.3338 | 0.12  | 0.22 | 1 MS.Trt_vs_MS.NoTrt_B |
| SEMA4F  | 0.00202 | -0.9236 | 0.401 | 0.52 | 1 MS.Trt_vs_MS.NoTrt_B |
| EMC3    | 0.00202 | -0.3237 | 0.73  | 0.9  | 1 MS.Trt_vs_MS.NoTrt_B |
| BUD31   | 0.00203 | 0.28505 | 0.586 | 0.7  | 1 MS.Trt_vs_MS.NoTrt_B |
| UST     | 0.00203 | 0.39698 | 0.198 | 0.31 | 1 MS.Trt_vs_MS.NoTrt_B |
| NUP205  | 0.00203 | 0.78802 | 0.105 | 0.2  | 1 MS.Trt_vs_MS.NoTrt_B |
| PCBP4   | 0.00204 | -0.7026 | 0.044 | 0.11 | 1 MS.Trt_vs_MS.NoTrt_B |
| PLAA    | 0.00207 | -0.2959 | 0.081 | 0.16 | 1 MS.Trt_vs_MS.NoTrt_B |
| DCTN4   | 0.00207 | -0.2953 | 0.227 | 0.34 | 1 MS.Trt_vs_MS.NoTrt_B |
| LIMS1   | 0.0021  | -0.3233 | 0.78  | 0.87 | 1 MS.Trt_vs_MS.NoTrt_B |
| LRRC37B | 0.0021  | -0.2503 | 0.442 | 0.59 | 1 MS.Trt_vs_MS.NoTrt_B |
| BANP    | 0.0021  | -0.3182 | 0.521 | 0.66 | 1 MS.Trt_vs_MS.NoTrt_B |
| MYCBP   | 0.00211 | -1.4166 | 0.048 | 0.11 | 1 MS.Trt_vs_MS.NoTrt_B |
| DDHD2   | 0.00212 | 0.51929 | 0.66  | 0.81 | 1 MS.Trt_vs_MS.NoTrt_B |
| SNAP29  | 0.00213 | -0.2816 | 0.577 | 0.73 | 1 MS.Trt_vs_MS.NoTrt_B |
| CNOT7   | 0.00214 | 0.33016 | 0.499 | 0.61 | 1 MS.Trt_vs_MS.NoTrt_B |
| ELF2    | 0.00214 | 0.26073 | 0.516 | 0.71 | 1 MS.Trt_vs_MS.NoTrt_B |
| PPAN    | 0.00215 | 0.43613 | 0.266 | 0.39 | 1 MS.Trt_vs_MS.NoTrt_B |
| GNAQ    | 0.00215 | 0.36354 | 0.135 | 0.23 | 1 MS.Trt_vs_MS.NoTrt_B |
| JAZF1   | 0.00216 | 0.28841 | 0.054 | 0.12 | 1 MS.Trt_vs_MS.NoTrt_B |
| ZBP1    | 0.00216 | -0.3752 | 0.46  | 0.56 | 1 MS.Trt_vs_MS.NoTrt_B |
| SRI     | 0.00217 | 0.29951 | 0.342 | 0.47 | 1 MS.Trt_vs_MS.NoTrt_B |
| FAM192A | 0.00217 | 0.54281 | 0.34  | 0.49 | 1 MS.Trt_vs_MS.NoTrt_B |
| FBXO4   | 0.00217 | -0.2755 | 0.174 | 0.28 | 1 MS.Trt_vs_MS.NoTrt_B |
| PANK2   | 0.00217 | -0.7898 | 0.418 | 0.54 | 1 MS.Trt_vs_MS.NoTrt_B |
| PDCD4   | 0.00218 | 0.52882 | 0.495 | 0.67 | 1 MS.Trt_vs_MS.NoTrt_B |
| CYB5B   | 0.00218 | 0.40011 | 0.388 | 0.53 | 1 MS.Trt_vs_MS.NoTrt_B |
| CNTROB  | 0.00219 | -0.7026 | 0.111 | 0.2  | 1 MS.Trt_vs_MS.NoTrt_B |
| SCAI    | 0.0022  | 0.49528 | 0.715 | 0.83 | 1 MS.Trt_vs_MS.NoTrt_B |
| CD99L2  | 0.00223 | -1.0354 | 0.072 | 0.15 | 1 MS.Trt_vs_MS.NoTrt_B |
| ENOPH1  | 0.00224 | -0.2802 | 0.089 | 0.17 | 1 MS.Trt_vs_MS.NoTrt_B |
| VTA1    | 0.00225 | 0.54723 | 0.264 | 0.4  | 1 MS.Trt_vs_MS.NoTrt_B |
| TSPYL4  | 0.00225 | -0.3505 | 0.105 | 0.2  | 1 MS.Trt_vs_MS.NoTrt_B |
| GLMN    | 0.00226 | 0.41229 | 0.065 | 0.14 | 1 MS.Trt_vs_MS.NoTrt_B |
| CNIH1   | 0.00226 | 0.27586 | 0.098 | 0.18 | 1 MS.Trt_vs_MS.NoTrt_B |
| ATPAF1  | 0.00226 | -1.6024 | 0.139 | 0.23 | 1 MS.Trt_vs_MS.NoTrt_B |
| ARID2   | 0.00227 | 0.62706 | 0.608 | 0.74 | 1 MS.Trt_vs_MS.NoTrt_B |
| GGA3    | 0.00227 | -0.2908 | 0.122 | 0.22 | 1 MS.Trt_vs_MS.NoTrt_B |
| STIP1   | 0.00227 | 0.33842 | 0.414 | 0.57 | 1 MS.Trt_vs_MS.NoTrt_B |
| SGTB    | 0.00228 | 0.33107 | 0.527 | 0.65 | 1 MS.Trt_vs_MS.NoTrt_B |

|             |         |         |       |      |                        |
|-------------|---------|---------|-------|------|------------------------|
| ZNF253      | 0.00228 | 0.27639 | 0.66  | 0.53 | 1 MS.Trt_vs_MS.NoTrt_B |
| SREK1       | 0.00228 | 0.37271 | 0.39  | 0.52 | 1 MS.Trt_vs_MS.NoTrt_B |
| PAPOLA      | 0.0023  | 0.4064  | 0.721 | 0.85 | 1 MS.Trt_vs_MS.NoTrt_B |
| WDFY2       | 0.0023  | -1.0661 | 0.471 | 0.58 | 1 MS.Trt_vs_MS.NoTrt_B |
| KLHL21      | 0.0023  | -0.8096 | 0.571 | 0.7  | 1 MS.Trt_vs_MS.NoTrt_B |
| PPIH        | 0.00233 | -0.8339 | 0.048 | 0.11 | 1 MS.Trt_vs_MS.NoTrt_B |
| EXOC3       | 0.00234 | -0.5978 | 0.142 | 0.24 | 1 MS.Trt_vs_MS.NoTrt_B |
| FYCO1       | 0.00234 | -0.403  | 0.094 | 0.18 | 1 MS.Trt_vs_MS.NoTrt_B |
| ATR         | 0.00235 | 0.51553 | 0.377 | 0.52 | 1 MS.Trt_vs_MS.NoTrt_B |
| SLC9A8      | 0.00235 | -0.3322 | 0.131 | 0.23 | 1 MS.Trt_vs_MS.NoTrt_B |
| DCTN5       | 0.00236 | -0.3415 | 0.678 | 0.82 | 1 MS.Trt_vs_MS.NoTrt_B |
| PPP1R21     | 0.00236 | -0.2569 | 0.168 | 0.27 | 1 MS.Trt_vs_MS.NoTrt_B |
| AVL9        | 0.00238 | 0.35871 | 0.78  | 0.92 | 1 MS.Trt_vs_MS.NoTrt_B |
| CCDC163     | 0.00238 | -0.8795 | 0.449 | 0.58 | 1 MS.Trt_vs_MS.NoTrt_B |
| UTS2B       | 0.00238 | 0.36427 | 0.155 | 0.27 | 1 MS.Trt_vs_MS.NoTrt_B |
| EIF5A2      | 0.00241 | 0.56837 | 0.253 | 0.39 | 1 MS.Trt_vs_MS.NoTrt_B |
| NPTN        | 0.00242 | -0.4408 | 0.174 | 0.28 | 1 MS.Trt_vs_MS.NoTrt_B |
| EP400NL     | 0.00243 | -0.6768 | 0.627 | 0.72 | 1 MS.Trt_vs_MS.NoTrt_B |
| FARP2       | 0.00243 | -0.8164 | 0.27  | 0.39 | 1 MS.Trt_vs_MS.NoTrt_B |
| CGGBP1      | 0.00244 | 0.35029 | 0.124 | 0.22 | 1 MS.Trt_vs_MS.NoTrt_B |
| KCNAB3      | 0.00245 | 0.60212 | 0.329 | 0.47 | 1 MS.Trt_vs_MS.NoTrt_B |
| CCDC81      | 0.00245 | -0.556  | 0.338 | 0.47 | 1 MS.Trt_vs_MS.NoTrt_B |
| ZNF350      | 0.00245 | -0.2756 | 0.466 | 0.61 | 1 MS.Trt_vs_MS.NoTrt_B |
| KIAA1109    | 0.00246 | 0.42533 | 0.264 | 0.38 | 1 MS.Trt_vs_MS.NoTrt_B |
| TMEM19      | 0.00246 | -0.5881 | 0.664 | 0.78 | 1 MS.Trt_vs_MS.NoTrt_B |
| PLEKHA3     | 0.00246 | 0.45673 | 0.61  | 0.75 | 1 MS.Trt_vs_MS.NoTrt_B |
| SLC38A3     | 0.00247 | -0.3778 | 0.163 | 0.27 | 1 MS.Trt_vs_MS.NoTrt_B |
| MINK1       | 0.00247 | 0.41512 | 0.153 | 0.26 | 1 MS.Trt_vs_MS.NoTrt_B |
| 8-Mar       | 0.00247 | 0.61545 | 0.288 | 0.44 | 1 MS.Trt_vs_MS.NoTrt_B |
| KIF27       | 0.00248 | 0.71893 | 0.24  | 0.38 | 1 MS.Trt_vs_MS.NoTrt_B |
| CSTF2T      | 0.00248 | -0.8201 | 0.052 | 0.12 | 1 MS.Trt_vs_MS.NoTrt_B |
| MCTS1       | 0.00248 | -0.2778 | 0.756 | 0.86 | 1 MS.Trt_vs_MS.NoTrt_B |
| ZBED1       | 0.00248 | -0.5661 | 0.381 | 0.5  | 1 MS.Trt_vs_MS.NoTrt_B |
| IKZF1       | 0.00249 | 0.26901 | 0.292 | 0.43 | 1 MS.Trt_vs_MS.NoTrt_B |
| ZNF33B      | 0.00249 | -0.6196 | 0.403 | 0.55 | 1 MS.Trt_vs_MS.NoTrt_B |
| KIF5B       | 0.00249 | 0.33972 | 0.211 | 0.34 | 1 MS.Trt_vs_MS.NoTrt_B |
| NEMF        | 0.00251 | 0.76343 | 0.63  | 0.8  | 1 MS.Trt_vs_MS.NoTrt_B |
| RAB40B      | 0.00252 | 0.51924 | 0.32  | 0.45 | 1 MS.Trt_vs_MS.NoTrt_B |
| C9orf142    | 0.00252 | -0.3065 | 0.176 | 0.28 | 1 MS.Trt_vs_MS.NoTrt_B |
| RP11-345J4. | 0.00252 | 0.40324 | 0.617 | 0.75 | 1 MS.Trt_vs_MS.NoTrt_B |

|          |         |         |       |      |                        |
|----------|---------|---------|-------|------|------------------------|
| PCNX4    | 0.00253 | -0.3579 | 0.749 | 0.87 | 1 MS.Trt_vs_MS.NoTrt_B |
| GRAP     | 0.00253 | -0.4244 | 0.115 | 0.21 | 1 MS.Trt_vs_MS.NoTrt_B |
| GALNT6   | 0.00255 | 0.4625  | 0.56  | 0.71 | 1 MS.Trt_vs_MS.NoTrt_B |
| SLC30A6  | 0.00256 | 0.63634 | 0.497 | 0.63 | 1 MS.Trt_vs_MS.NoTrt_B |
| SLC35A1  | 0.00257 | -0.4301 | 0.074 | 0.15 | 1 MS.Trt_vs_MS.NoTrt_B |
| ZNF441   | 0.00257 | -1.2184 | 0.113 | 0.21 | 1 MS.Trt_vs_MS.NoTrt_B |
| PPP1R3F  | 0.00257 | 1.06159 | 0.094 | 0.18 | 1 MS.Trt_vs_MS.NoTrt_B |
| RRP1     | 0.00257 | 0.53786 | 0.538 | 0.7  | 1 MS.Trt_vs_MS.NoTrt_B |
| CYSTM1   | 0.00258 | -0.4293 | 0.192 | 0.3  | 1 MS.Trt_vs_MS.NoTrt_B |
| COMTD1   | 0.00259 | -1.0713 | 0.057 | 0.12 | 1 MS.Trt_vs_MS.NoTrt_B |
| SYNJ2BP  | 0.00259 | 0.3274  | 0.728 | 0.82 | 1 MS.Trt_vs_MS.NoTrt_B |
| POLD1    | 0.0026  | -0.4014 | 0.113 | 0.2  | 1 MS.Trt_vs_MS.NoTrt_B |
| STAMBP   | 0.0026  | -0.3223 | 0.094 | 0.18 | 1 MS.Trt_vs_MS.NoTrt_B |
| PPP2R5D  | 0.00261 | -0.5779 | 0.12  | 0.21 | 1 MS.Trt_vs_MS.NoTrt_B |
| RABGEF1  | 0.00261 | -0.4224 | 0.214 | 0.32 | 1 MS.Trt_vs_MS.NoTrt_B |
| KIAA0922 | 0.00262 | 0.34525 | 0.381 | 0.53 | 1 MS.Trt_vs_MS.NoTrt_B |
| MTRF1    | 0.00263 | -0.3462 | 0.455 | 0.57 | 1 MS.Trt_vs_MS.NoTrt_B |
| ARMC9    | 0.00264 | 0.43631 | 0.512 | 0.68 | 1 MS.Trt_vs_MS.NoTrt_B |
| KCNV1    | 0.00264 | 0.40205 | 0.423 | 0.6  | 1 MS.Trt_vs_MS.NoTrt_B |
| THTPA    | 0.00264 | -1.028  | 0.057 | 0.12 | 1 MS.Trt_vs_MS.NoTrt_B |
| UBE4A    | 0.00266 | 0.38348 | 0.307 | 0.46 | 1 MS.Trt_vs_MS.NoTrt_B |
| WDR76    | 0.00266 | -0.5996 | 0.547 | 0.69 | 1 MS.Trt_vs_MS.NoTrt_B |
| ANGEL2   | 0.00266 | 0.68133 | 0.571 | 0.69 | 1 MS.Trt_vs_MS.NoTrt_B |
| HIF1A    | 0.00267 | -0.468  | 0.802 | 0.94 | 1 MS.Trt_vs_MS.NoTrt_B |
| SCO1     | 0.00268 | -0.4821 | 0.66  | 0.8  | 1 MS.Trt_vs_MS.NoTrt_B |
| ITGB7    | 0.00268 | -0.3815 | 0.264 | 0.37 | 1 MS.Trt_vs_MS.NoTrt_B |
| BDP1     | 0.00269 | 0.43561 | 0.58  | 0.74 | 1 MS.Trt_vs_MS.NoTrt_B |
| DARS     | 0.0027  | 0.36309 | 0.235 | 0.37 | 1 MS.Trt_vs_MS.NoTrt_B |
| BTLA     | 0.0027  | -0.3191 | 0.098 | 0.18 | 1 MS.Trt_vs_MS.NoTrt_B |
| THOC7    | 0.00271 | 0.25764 | 0.133 | 0.24 | 1 MS.Trt_vs_MS.NoTrt_B |
| COX20    | 0.00271 | 0.43964 | 0.475 | 0.64 | 1 MS.Trt_vs_MS.NoTrt_B |
| ATP11A   | 0.00272 | 0.2974  | 0.187 | 0.3  | 1 MS.Trt_vs_MS.NoTrt_B |
| KATNAL2  | 0.00273 | 0.6019  | 0.203 | 0.32 | 1 MS.Trt_vs_MS.NoTrt_B |
| MYB      | 0.00274 | -0.3135 | 0.209 | 0.33 | 1 MS.Trt_vs_MS.NoTrt_B |
| CERKL    | 0.00276 | 0.72184 | 0.275 | 0.43 | 1 MS.Trt_vs_MS.NoTrt_B |
| TMEM120A | 0.00276 | -0.4225 | 0.087 | 0.17 | 1 MS.Trt_vs_MS.NoTrt_B |
| MRPS11   | 0.00277 | -0.2745 | 0.562 | 0.7  | 1 MS.Trt_vs_MS.NoTrt_B |
| KDM5B    | 0.0028  | 0.64126 | 0.253 | 0.37 | 1 MS.Trt_vs_MS.NoTrt_B |
| FAM160B1 | 0.00281 | -0.4256 | 0.142 | 0.24 | 1 MS.Trt_vs_MS.NoTrt_B |
| NEBL     | 0.00281 | 0.26669 | 0.196 | 0.32 | 1 MS.Trt_vs_MS.NoTrt_B |

|          |         |         |       |      |                        |
|----------|---------|---------|-------|------|------------------------|
| MAGED2   | 0.00283 | -0.5287 | 0.133 | 0.22 | 1 MS.Trt_vs_MS.NoTrt_B |
| IL15RA   | 0.00283 | -1.0395 | 0.061 | 0.13 | 1 MS.Trt_vs_MS.NoTrt_B |
| MRT04    | 0.00283 | -0.4719 | 0.392 | 0.55 | 1 MS.Trt_vs_MS.NoTrt_B |
| GLCC1    | 0.00283 | 0.31523 | 0.194 | 0.31 | 1 MS.Trt_vs_MS.NoTrt_B |
| SLC43A1  | 0.00284 | -0.6853 | 0.068 | 0.14 | 1 MS.Trt_vs_MS.NoTrt_B |
| RNF44    | 0.00284 | 0.62751 | 0.22  | 0.32 | 1 MS.Trt_vs_MS.NoTrt_B |
| MTHFD2   | 0.00285 | 0.6384  | 0.527 | 0.66 | 1 MS.Trt_vs_MS.NoTrt_B |
| GNL3     | 0.00285 | -0.8417 | 0.076 | 0.15 | 1 MS.Trt_vs_MS.NoTrt_B |
| MORC2    | 0.00286 | -0.301  | 0.34  | 0.44 | 1 MS.Trt_vs_MS.NoTrt_B |
| WDR73    | 0.00286 | -0.4454 | 0.917 | 0.98 | 1 MS.Trt_vs_MS.NoTrt_B |
| FAM35A   | 0.00287 | 0.36995 | 0.063 | 0.14 | 1 MS.Trt_vs_MS.NoTrt_B |
| KYAT3    | 0.00287 | -0.3571 | 0.046 | 0.11 | 1 MS.Trt_vs_MS.NoTrt_B |
| CBWD7    | 0.00288 | 0.41159 | 0.377 | 0.5  | 1 MS.Trt_vs_MS.NoTrt_B |
| SLC35A5  | 0.00288 | 0.77982 | 0.301 | 0.43 | 1 MS.Trt_vs_MS.NoTrt_B |
| NCOA3    | 0.00289 | 0.3681  | 0.632 | 0.78 | 1 MS.Trt_vs_MS.NoTrt_B |
| HLA-DPA1 | 0.00289 | -0.325  | 0.166 | 0.27 | 1 MS.Trt_vs_MS.NoTrt_B |
| AASDHPPT | 0.00289 | -0.4793 | 0.092 | 0.17 | 1 MS.Trt_vs_MS.NoTrt_B |
| CASP3    | 0.00292 | -0.4782 | 0.072 | 0.15 | 1 MS.Trt_vs_MS.NoTrt_B |
| ZNF148   | 0.00295 | 0.32676 | 0.19  | 0.3  | 1 MS.Trt_vs_MS.NoTrt_B |
| PAPSS1   | 0.00296 | -0.318  | 0.102 | 0.19 | 1 MS.Trt_vs_MS.NoTrt_B |
| SNX14    | 0.00296 | 0.26414 | 0.379 | 0.51 | 1 MS.Trt_vs_MS.NoTrt_B |
| LAS1L    | 0.00296 | -0.3874 | 0.109 | 0.2  | 1 MS.Trt_vs_MS.NoTrt_B |
| IKZF4    | 0.00297 | 0.47397 | 0.12  | 0.21 | 1 MS.Trt_vs_MS.NoTrt_B |
| CHCHD3   | 0.00297 | -0.4219 | 0.113 | 0.2  | 1 MS.Trt_vs_MS.NoTrt_B |
| UBXN8    | 0.00298 | -0.6447 | 0.115 | 0.21 | 1 MS.Trt_vs_MS.NoTrt_B |
| FKBP11   | 0.00302 | -0.336  | 0.553 | 0.7  | 1 MS.Trt_vs_MS.NoTrt_B |
| GNL2     | 0.00305 | -0.7595 | 0.527 | 0.7  | 1 MS.Trt_vs_MS.NoTrt_B |
| C15orf61 | 0.00305 | 0.53728 | 0.451 | 0.64 | 1 MS.Trt_vs_MS.NoTrt_B |
| SIRT5    | 0.00307 | -0.4488 | 0.749 | 0.88 | 1 MS.Trt_vs_MS.NoTrt_B |
| FKBP14   | 0.00309 | -0.3234 | 0.44  | 0.58 | 1 MS.Trt_vs_MS.NoTrt_B |
| 5-Mar    | 0.00311 | -0.3309 | 0.118 | 0.21 | 1 MS.Trt_vs_MS.NoTrt_B |
| SKIDA1   | 0.00312 | -0.5351 | 0.277 | 0.41 | 1 MS.Trt_vs_MS.NoTrt_B |
| UNC13D   | 0.00313 | -0.3329 | 0.508 | 0.62 | 1 MS.Trt_vs_MS.NoTrt_B |
| MAST3    | 0.00314 | 0.36876 | 0.617 | 0.75 | 1 MS.Trt_vs_MS.NoTrt_B |
| DUSP10   | 0.00315 | -0.4058 | 0.1   | 0.18 | 1 MS.Trt_vs_MS.NoTrt_B |
| R3HDM2   | 0.00315 | 0.52753 | 0.756 | 0.88 | 1 MS.Trt_vs_MS.NoTrt_B |
| RNF24    | 0.00315 | -0.2915 | 0.423 | 0.56 | 1 MS.Trt_vs_MS.NoTrt_B |
| AGAP4    | 0.00317 | 1.26549 | 0.174 | 0.29 | 1 MS.Trt_vs_MS.NoTrt_B |
| MX2      | 0.00318 | -0.3491 | 0.773 | 0.92 | 1 MS.Trt_vs_MS.NoTrt_B |
| ACBD4    | 0.00319 | -0.9427 | 0.246 | 0.35 | 1 MS.Trt_vs_MS.NoTrt_B |

|            |         |         |       |      |                        |
|------------|---------|---------|-------|------|------------------------|
| EXOSC3     | 0.00319 | 0.5299  | 0.298 | 0.44 | 1 MS.Trt_vs_MS.NoTrt_B |
| CHMP1A     | 0.0032  | -0.476  | 0.155 | 0.25 | 1 MS.Trt_vs_MS.NoTrt_B |
| AMPD3      | 0.00322 | -1.1664 | 0.316 | 0.45 | 1 MS.Trt_vs_MS.NoTrt_B |
| FANK1      | 0.00323 | -0.2513 | 0.107 | 0.19 | 1 MS.Trt_vs_MS.NoTrt_B |
| ZDHHC12    | 0.00324 | -0.6841 | 0.085 | 0.16 | 1 MS.Trt_vs_MS.NoTrt_B |
| ACAD9      | 0.00324 | -0.4216 | 0.235 | 0.34 | 1 MS.Trt_vs_MS.NoTrt_B |
| ETHE1      | 0.00324 | -0.6863 | 0.05  | 0.11 | 1 MS.Trt_vs_MS.NoTrt_B |
| CRYZ       | 0.00326 | 0.33436 | 0.068 | 0.14 | 1 MS.Trt_vs_MS.NoTrt_B |
| MLST8      | 0.00328 | -0.3923 | 0.277 | 0.4  | 1 MS.Trt_vs_MS.NoTrt_B |
| SPAG16     | 0.00329 | 0.38357 | 0.309 | 0.44 | 1 MS.Trt_vs_MS.NoTrt_B |
| SFT2D3     | 0.00329 | 0.26665 | 0.336 | 0.47 | 1 MS.Trt_vs_MS.NoTrt_B |
| HABP4      | 0.0033  | 0.83232 | 0.068 | 0.14 | 1 MS.Trt_vs_MS.NoTrt_B |
| TRIM11     | 0.00333 | -0.2775 | 0.425 | 0.55 | 1 MS.Trt_vs_MS.NoTrt_B |
| MAT2A      | 0.00334 | -0.2847 | 0.087 | 0.17 | 1 MS.Trt_vs_MS.NoTrt_B |
| ZNF569     | 0.00334 | 1.10291 | 0.126 | 0.22 | 1 MS.Trt_vs_MS.NoTrt_B |
| CNNM3      | 0.00334 | 0.46559 | 0.492 | 0.63 | 1 MS.Trt_vs_MS.NoTrt_B |
| PTER       | 0.00334 | -0.6247 | 0.107 | 0.19 | 1 MS.Trt_vs_MS.NoTrt_B |
| PTBP3      | 0.00335 | 0.72029 | 0.235 | 0.36 | 1 MS.Trt_vs_MS.NoTrt_B |
| PPIP5K2    | 0.00335 | 0.47146 | 0.671 | 0.86 | 1 MS.Trt_vs_MS.NoTrt_B |
| RTKL1-TNFR | 0.0034  | -0.3564 | 0.046 | 0.11 | 1 MS.Trt_vs_MS.NoTrt_B |
| ACADS      | 0.00342 | -0.9398 | 0.05  | 0.11 | 1 MS.Trt_vs_MS.NoTrt_B |
| NHEJ1      | 0.00342 | -1.7969 | 0.111 | 0.2  | 1 MS.Trt_vs_MS.NoTrt_B |
| RBM14      | 0.00346 | -0.3136 | 0.135 | 0.23 | 1 MS.Trt_vs_MS.NoTrt_B |
| CSNK1G3    | 0.00346 | -0.4409 | 0.046 | 0.11 | 1 MS.Trt_vs_MS.NoTrt_B |
| KLHL18     | 0.00346 | -0.8697 | 0.279 | 0.39 | 1 MS.Trt_vs_MS.NoTrt_B |
| USB1       | 0.00347 | -0.3618 | 0.072 | 0.15 | 1 MS.Trt_vs_MS.NoTrt_B |
| DDIT4      | 0.00347 | -0.7217 | 0.12  | 0.21 | 1 MS.Trt_vs_MS.NoTrt_B |
| AZIN2      | 0.00348 | 1.02812 | 0.183 | 0.29 | 1 MS.Trt_vs_MS.NoTrt_B |
| SYNJ2      | 0.00349 | -0.3198 | 0.789 | 0.89 | 1 MS.Trt_vs_MS.NoTrt_B |
| MRPL46     | 0.00351 | 0.32104 | 0.183 | 0.29 | 1 MS.Trt_vs_MS.NoTrt_B |
| ATF7       | 0.00352 | 0.42967 | 0.353 | 0.5  | 1 MS.Trt_vs_MS.NoTrt_B |
| TGFBR3     | 0.00352 | 0.25084 | 0.34  | 0.47 | 1 MS.Trt_vs_MS.NoTrt_B |
| SEMA4D     | 0.00354 | 0.31273 | 0.375 | 0.52 | 1 MS.Trt_vs_MS.NoTrt_B |
| SEMA3B     | 0.00354 | 0.32315 | 0.157 | 0.26 | 1 MS.Trt_vs_MS.NoTrt_B |
| AD000671.6 | 0.00355 | -0.3693 | 0.061 | 0.13 | 1 MS.Trt_vs_MS.NoTrt_B |
| INO80E     | 0.00356 | 0.49196 | 0.131 | 0.23 | 1 MS.Trt_vs_MS.NoTrt_B |
| CLU        | 0.00356 | -0.6082 | 0.355 | 0.48 | 1 MS.Trt_vs_MS.NoTrt_B |
| STX5       | 0.00356 | -0.9362 | 0.044 | 0.1  | 1 MS.Trt_vs_MS.NoTrt_B |
| C10orf76   | 0.00356 | -0.3222 | 0.218 | 0.34 | 1 MS.Trt_vs_MS.NoTrt_B |
| CEP164     | 0.00357 | -0.8836 | 0.092 | 0.17 | 1 MS.Trt_vs_MS.NoTrt_B |

|         |         |         |       |      |                        |
|---------|---------|---------|-------|------|------------------------|
| LEKR1   | 0.00358 | -0.3583 | 0.115 | 0.21 | 1 MS.Trt_vs_MS.NoTrt_B |
| THAP4   | 0.00359 | -0.2789 | 0.085 | 0.16 | 1 MS.Trt_vs_MS.NoTrt_B |
| CLK4    | 0.00359 | 0.40847 | 0.551 | 0.69 | 1 MS.Trt_vs_MS.NoTrt_B |
| PIKFYVE | 0.00359 | 0.34813 | 0.303 | 0.42 | 1 MS.Trt_vs_MS.NoTrt_B |
| QSOX1   | 0.0036  | -0.4731 | 0.253 | 0.36 | 1 MS.Trt_vs_MS.NoTrt_B |
| CD2BP2  | 0.00361 | -0.3623 | 0.113 | 0.2  | 1 MS.Trt_vs_MS.NoTrt_B |
| VOPP1   | 0.00361 | -0.4004 | 0.227 | 0.33 | 1 MS.Trt_vs_MS.NoTrt_B |
| CA5B    | 0.00361 | 0.37711 | 0.734 | 0.89 | 1 MS.Trt_vs_MS.NoTrt_B |
| INSIG1  | 0.00362 | 0.35148 | 0.098 | 0.18 | 1 MS.Trt_vs_MS.NoTrt_B |
| USP53   | 0.00362 | 0.28681 | 0.425 | 0.56 | 1 MS.Trt_vs_MS.NoTrt_B |
| SMARCC1 | 0.00363 | -0.4113 | 0.364 | 0.48 | 1 MS.Trt_vs_MS.NoTrt_B |
| UBLCP1  | 0.00365 | -0.5455 | 0.124 | 0.21 | 1 MS.Trt_vs_MS.NoTrt_B |
| NCOR1   | 0.00366 | 0.25344 | 0.943 | 1    | 1 MS.Trt_vs_MS.NoTrt_B |
| GTF3C2  | 0.00366 | -0.2741 | 0.41  | 0.56 | 1 MS.Trt_vs_MS.NoTrt_B |
| POMT1   | 0.00366 | -0.8006 | 0.436 | 0.58 | 1 MS.Trt_vs_MS.NoTrt_B |
| DEPDC1B | 0.00367 | -0.2831 | 0.146 | 0.24 | 1 MS.Trt_vs_MS.NoTrt_B |
| LYRM1   | 0.00368 | 0.76692 | 0.416 | 0.57 | 1 MS.Trt_vs_MS.NoTrt_B |
| CBLL1   | 0.00369 | 0.30949 | 0.246 | 0.38 | 1 MS.Trt_vs_MS.NoTrt_B |
| AMZ2    | 0.0037  | 0.3756  | 0.41  | 0.55 | 1 MS.Trt_vs_MS.NoTrt_B |
| BICDL1  | 0.0037  | 0.63707 | 0.464 | 0.57 | 1 MS.Trt_vs_MS.NoTrt_B |
| ALMS1   | 0.00371 | -0.694  | 0.342 | 0.46 | 1 MS.Trt_vs_MS.NoTrt_B |
| CXorf21 | 0.00371 | -1.1269 | 0.227 | 0.33 | 1 MS.Trt_vs_MS.NoTrt_B |
| ITGAE   | 0.00372 | 0.32072 | 0.434 | 0.6  | 1 MS.Trt_vs_MS.NoTrt_B |
| ZNF524  | 0.00372 | -0.3196 | 0.061 | 0.13 | 1 MS.Trt_vs_MS.NoTrt_B |
| SAP18   | 0.00372 | 0.27082 | 0.316 | 0.45 | 1 MS.Trt_vs_MS.NoTrt_B |
| SETX    | 0.00373 | 0.41706 | 0.22  | 0.35 | 1 MS.Trt_vs_MS.NoTrt_B |
| KTN1    | 0.00378 | 0.84388 | 0.449 | 0.67 | 1 MS.Trt_vs_MS.NoTrt_B |
| EEA1    | 0.00381 | -0.3365 | 0.155 | 0.25 | 1 MS.Trt_vs_MS.NoTrt_B |
| MALSU1  | 0.00382 | -0.3927 | 0.085 | 0.16 | 1 MS.Trt_vs_MS.NoTrt_B |
| XXYLT1  | 0.00382 | -0.7181 | 0.159 | 0.25 | 1 MS.Trt_vs_MS.NoTrt_B |
| RCN1    | 0.00383 | -0.8964 | 0.078 | 0.15 | 1 MS.Trt_vs_MS.NoTrt_B |
| NBPF26  | 0.00384 | 0.25021 | 0.218 | 0.32 | 1 MS.Trt_vs_MS.NoTrt_B |
| PFKL    | 0.00386 | -0.369  | 0.658 | 0.73 | 1 MS.Trt_vs_MS.NoTrt_B |
| KDM7A   | 0.00387 | 0.28344 | 0.139 | 0.23 | 1 MS.Trt_vs_MS.NoTrt_B |
| NET1    | 0.00388 | -0.4166 | 0.054 | 0.12 | 1 MS.Trt_vs_MS.NoTrt_B |
| MRPL39  | 0.0039  | -0.2593 | 0.078 | 0.15 | 1 MS.Trt_vs_MS.NoTrt_B |
| PIGA    | 0.00391 | 0.37949 | 0.316 | 0.43 | 1 MS.Trt_vs_MS.NoTrt_B |
| RNF41   | 0.00391 | 0.34492 | 0.606 | 0.75 | 1 MS.Trt_vs_MS.NoTrt_B |
| KLHL12  | 0.00395 | -1.0176 | 0.048 | 0.11 | 1 MS.Trt_vs_MS.NoTrt_B |
| TTN     | 0.00396 | 0.42963 | 0.532 | 0.69 | 1 MS.Trt_vs_MS.NoTrt_B |

|          |         |         |       |      |                        |
|----------|---------|---------|-------|------|------------------------|
| ZNF365   | 0.00396 | -0.5862 | 0.229 | 0.35 | 1 MS.Trt_vs_MS.NoTrt_B |
| TMEM222  | 0.00397 | -0.8107 | 0.078 | 0.15 | 1 MS.Trt_vs_MS.NoTrt_B |
| OGFOD1   | 0.00397 | 0.44983 | 0.529 | 0.68 | 1 MS.Trt_vs_MS.NoTrt_B |
| RNF212   | 0.00397 | -0.3924 | 0.427 | 0.58 | 1 MS.Trt_vs_MS.NoTrt_B |
| YTHDC1   | 0.00399 | 0.25921 | 0.359 | 0.48 | 1 MS.Trt_vs_MS.NoTrt_B |
| LMNA     | 0.004   | -0.3942 | 0.451 | 0.56 | 1 MS.Trt_vs_MS.NoTrt_B |
| CNTNAP1  | 0.004   | -0.3559 | 0.351 | 0.48 | 1 MS.Trt_vs_MS.NoTrt_B |
| KATNA1   | 0.004   | -0.707  | 0.059 | 0.12 | 1 MS.Trt_vs_MS.NoTrt_B |
| CDCA3    | 0.004   | -0.8344 | 0.455 | 0.57 | 1 MS.Trt_vs_MS.NoTrt_B |
| FBXO24   | 0.00401 | -0.3859 | 0.294 | 0.43 | 1 MS.Trt_vs_MS.NoTrt_B |
| CNNM2    | 0.00401 | -0.3874 | 0.207 | 0.31 | 1 MS.Trt_vs_MS.NoTrt_B |
| SLC41A2  | 0.00404 | -0.3763 | 0.179 | 0.28 | 1 MS.Trt_vs_MS.NoTrt_B |
| EPHA4    | 0.00404 | 0.33529 | 0.133 | 0.23 | 1 MS.Trt_vs_MS.NoTrt_B |
| BCAT2    | 0.00406 | 0.40552 | 0.118 | 0.21 | 1 MS.Trt_vs_MS.NoTrt_B |
| RCAN1    | 0.00406 | 0.26823 | 0.211 | 0.32 | 1 MS.Trt_vs_MS.NoTrt_B |
| UBR4     | 0.00406 | 0.26531 | 0.608 | 0.78 | 1 MS.Trt_vs_MS.NoTrt_B |
| SEC24C   | 0.00406 | -0.4531 | 0.17  | 0.26 | 1 MS.Trt_vs_MS.NoTrt_B |
| YPEL2    | 0.00407 | -0.368  | 0.142 | 0.23 | 1 MS.Trt_vs_MS.NoTrt_B |
| SMARCA5  | 0.00408 | 0.63769 | 0.27  | 0.4  | 1 MS.Trt_vs_MS.NoTrt_B |
| FBXO15   | 0.00409 | 0.25491 | 0.458 | 0.58 | 1 MS.Trt_vs_MS.NoTrt_B |
| RUSC1    | 0.00411 | -0.9794 | 0.044 | 0.1  | 1 MS.Trt_vs_MS.NoTrt_B |
| ADARB2   | 0.00411 | 0.56308 | 0.216 | 0.35 | 1 MS.Trt_vs_MS.NoTrt_B |
| TPK1     | 0.00413 | 0.43868 | 0.253 | 0.37 | 1 MS.Trt_vs_MS.NoTrt_B |
| SLC16A10 | 0.00413 | 0.33311 | 0.704 | 0.81 | 1 MS.Trt_vs_MS.NoTrt_B |
| GTPBP8   | 0.00416 | -0.3847 | 0.545 | 0.66 | 1 MS.Trt_vs_MS.NoTrt_B |
| CHMP5    | 0.00416 | -0.5142 | 0.078 | 0.15 | 1 MS.Trt_vs_MS.NoTrt_B |
| MAP1LC3B | 0.00416 | 0.47706 | 0.272 | 0.4  | 1 MS.Trt_vs_MS.NoTrt_B |
| ST3GAL3  | 0.00417 | -0.4907 | 0.654 | 0.82 | 1 MS.Trt_vs_MS.NoTrt_B |
| HERPUD2  | 0.00417 | 0.2826  | 0.375 | 0.49 | 1 MS.Trt_vs_MS.NoTrt_B |
| TRAPPC6A | 0.00421 | -0.4121 | 0.126 | 0.22 | 1 MS.Trt_vs_MS.NoTrt_B |
| JKAMP    | 0.00421 | 0.2676  | 0.678 | 0.81 | 1 MS.Trt_vs_MS.NoTrt_B |
| MAN1B1   | 0.00422 | -0.5304 | 0.264 | 0.37 | 1 MS.Trt_vs_MS.NoTrt_B |
| VWA9     | 0.00422 | -0.4974 | 0.059 | 0.12 | 1 MS.Trt_vs_MS.NoTrt_B |
| C10orf95 | 0.00422 | -0.3648 | 0.179 | 0.27 | 1 MS.Trt_vs_MS.NoTrt_B |
| COPS3    | 0.00423 | -0.2547 | 0.198 | 0.29 | 1 MS.Trt_vs_MS.NoTrt_B |
| KDM2A    | 0.00423 | 0.29591 | 0.778 | 0.88 | 1 MS.Trt_vs_MS.NoTrt_B |
| HSD17B4  | 0.00423 | 0.44535 | 0.477 | 0.63 | 1 MS.Trt_vs_MS.NoTrt_B |
| SETD7    | 0.00424 | -0.391  | 0.728 | 0.84 | 1 MS.Trt_vs_MS.NoTrt_B |
| CLDND1   | 0.00425 | 0.39646 | 0.27  | 0.4  | 1 MS.Trt_vs_MS.NoTrt_B |
| ACAA1    | 0.00425 | -0.4751 | 0.325 | 0.45 | 1 MS.Trt_vs_MS.NoTrt_B |



|          |         |         |       |      |   |                      |
|----------|---------|---------|-------|------|---|----------------------|
| LSS      | 0.00425 | -0.3614 | 0.07  | 0.14 | 1 | MS.Trt_vs_MS.NoTrt_B |
| KDELC2   | 0.00426 | -0.8088 | 0.442 | 0.55 | 1 | MS.Trt_vs_MS.NoTrt_B |
| NDUFAF6  | 0.00427 | 0.3562  | 0.484 | 0.63 | 1 | MS.Trt_vs_MS.NoTrt_B |
| KIAA0907 | 0.00427 | 0.63969 | 0.632 | 0.78 | 1 | MS.Trt_vs_MS.NoTrt_B |
| FRA10AC1 | 0.00427 | 1.0311  | 0.423 | 0.61 | 1 | MS.Trt_vs_MS.NoTrt_B |
| COG2     | 0.0043  | -0.349  | 0.275 | 0.38 | 1 | MS.Trt_vs_MS.NoTrt_B |
| NCOA6    | 0.00431 | 0.42789 | 0.551 | 0.69 | 1 | MS.Trt_vs_MS.NoTrt_B |
| AIMP2    | 0.00432 | -0.9793 | 0.257 | 0.36 | 1 | MS.Trt_vs_MS.NoTrt_B |
| KDM4B    | 0.00432 | -0.2799 | 0.49  | 0.6  | 1 | MS.Trt_vs_MS.NoTrt_B |
| PSKH1    | 0.00434 | -0.4287 | 0.065 | 0.14 | 1 | MS.Trt_vs_MS.NoTrt_B |
| NAT10    | 0.00435 | -0.6614 | 0.251 | 0.36 | 1 | MS.Trt_vs_MS.NoTrt_B |
| C19orf48 | 0.00436 | -1.1296 | 0.281 | 0.4  | 1 | MS.Trt_vs_MS.NoTrt_B |
| TOR2A    | 0.00436 | -0.735  | 0.044 | 0.1  | 1 | MS.Trt_vs_MS.NoTrt_B |
| POLR3E   | 0.00442 | 0.40048 | 0.386 | 0.54 | 1 | MS.Trt_vs_MS.NoTrt_B |
| EXO1     | 0.00447 | -1.1756 | 0.109 | 0.2  | 1 | MS.Trt_vs_MS.NoTrt_B |
| MIPOL1   | 0.00447 | 0.35758 | 0.974 | 0.98 | 1 | MS.Trt_vs_MS.NoTrt_B |
| C1R      | 0.00447 | 0.40779 | 0.242 | 0.38 | 1 | MS.Trt_vs_MS.NoTrt_B |
| ZNF557   | 0.00449 | 0.51511 | 0.758 | 0.86 | 1 | MS.Trt_vs_MS.NoTrt_B |
| ARNT     | 0.00449 | -0.6147 | 0.63  | 0.77 | 1 | MS.Trt_vs_MS.NoTrt_B |
| ANKRD27  | 0.0045  | 0.36064 | 0.131 | 0.22 | 1 | MS.Trt_vs_MS.NoTrt_B |
| UTP18    | 0.00451 | -0.5913 | 0.115 | 0.2  | 1 | MS.Trt_vs_MS.NoTrt_B |
| HAAO     | 0.00452 | -0.7116 | 0.054 | 0.12 | 1 | MS.Trt_vs_MS.NoTrt_B |
| PQLC2    | 0.00452 | -0.704  | 0.32  | 0.45 | 1 | MS.Trt_vs_MS.NoTrt_B |
| ARHGAP31 | 0.00453 | 0.30546 | 0.176 | 0.29 | 1 | MS.Trt_vs_MS.NoTrt_B |
| RPL7     | 0.00455 | 0.36094 | 0.904 | 1    | 1 | MS.Trt_vs_MS.NoTrt_B |
| PPIF     | 0.00455 | -0.541  | 0.044 | 0.1  | 1 | MS.Trt_vs_MS.NoTrt_B |
| SEC14L1  | 0.00456 | -0.6642 | 0.527 | 0.67 | 1 | MS.Trt_vs_MS.NoTrt_B |
| CEP104   | 0.00458 | 0.2638  | 0.564 | 0.65 | 1 | MS.Trt_vs_MS.NoTrt_B |
| CDC14B   | 0.00458 | -0.9446 | 0.179 | 0.29 | 1 | MS.Trt_vs_MS.NoTrt_B |
| PITPNA   | 0.00459 | -0.7384 | 0.059 | 0.12 | 1 | MS.Trt_vs_MS.NoTrt_B |
| FBXO5    | 0.00459 | 0.57079 | 0.268 | 0.4  | 1 | MS.Trt_vs_MS.NoTrt_B |
| DTYMK    | 0.00459 | 0.30102 | 0.429 | 0.55 | 1 | MS.Trt_vs_MS.NoTrt_B |
| JMJD6    | 0.0046  | -0.6401 | 0.322 | 0.44 | 1 | MS.Trt_vs_MS.NoTrt_B |
| TRERF1   | 0.0046  | -0.2628 | 0.135 | 0.23 | 1 | MS.Trt_vs_MS.NoTrt_B |
| MUT      | 0.0046  | -0.4826 | 0.044 | 0.1  | 1 | MS.Trt_vs_MS.NoTrt_B |
| FCGRT    | 0.00461 | -0.3874 | 0.139 | 0.23 | 1 | MS.Trt_vs_MS.NoTrt_B |
| NABP2    | 0.00462 | -0.8274 | 0.368 | 0.49 | 1 | MS.Trt_vs_MS.NoTrt_B |
| PARBP    | 0.00462 | 0.68429 | 0.257 | 0.38 | 1 | MS.Trt_vs_MS.NoTrt_B |
| SLC25A11 | 0.00466 | -0.3341 | 0.102 | 0.18 | 1 | MS.Trt_vs_MS.NoTrt_B |
| TRMT1L   | 0.0047  | -0.4477 | 0.068 | 0.14 | 1 | MS.Trt_vs_MS.NoTrt_B |

|            |         |         |       |      |                        |
|------------|---------|---------|-------|------|------------------------|
| SMG8       | 0.00471 | -0.5896 | 0.063 | 0.13 | 1 MS.Trt_vs_MS.NoTrt_B |
| ACYP1      | 0.00472 | 0.26153 | 0.168 | 0.27 | 1 MS.Trt_vs_MS.NoTrt_B |
| VPS72      | 0.00472 | 0.30137 | 0.089 | 0.17 | 1 MS.Trt_vs_MS.NoTrt_B |
| WDR18      | 0.00472 | -0.4741 | 0.063 | 0.13 | 1 MS.Trt_vs_MS.NoTrt_B |
| ALG13      | 0.00473 | 0.30973 | 0.19  | 0.3  | 1 MS.Trt_vs_MS.NoTrt_B |
| ENO2       | 0.00473 | -0.4748 | 0.174 | 0.27 | 1 MS.Trt_vs_MS.NoTrt_B |
| AP4E1      | 0.00475 | 0.7327  | 0.264 | 0.38 | 1 MS.Trt_vs_MS.NoTrt_B |
| PRKAA1     | 0.00475 | 0.31705 | 0.719 | 0.9  | 1 MS.Trt_vs_MS.NoTrt_B |
| ARFGAP2    | 0.00475 | -0.2552 | 0.455 | 0.6  | 1 MS.Trt_vs_MS.NoTrt_B |
| ASB6       | 0.00476 | -0.8921 | 0.436 | 0.54 | 1 MS.Trt_vs_MS.NoTrt_B |
| CLPX       | 0.00476 | 0.56586 | 0.569 | 0.73 | 1 MS.Trt_vs_MS.NoTrt_B |
| FAM47E-STE | 0.00476 | 0.49338 | 0.115 | 0.21 | 1 MS.Trt_vs_MS.NoTrt_B |
| TBXAS1     | 0.00477 | -0.35   | 0.292 | 0.42 | 1 MS.Trt_vs_MS.NoTrt_B |
| CARD19     | 0.00478 | -0.2549 | 0.205 | 0.31 | 1 MS.Trt_vs_MS.NoTrt_B |
| DAGLB      | 0.0048  | 0.26517 | 0.654 | 0.84 | 1 MS.Trt_vs_MS.NoTrt_B |
| MAGED1     | 0.0048  | -0.4596 | 0.571 | 0.69 | 1 MS.Trt_vs_MS.NoTrt_B |
| NCBP1      | 0.00484 | 0.58687 | 0.556 | 0.71 | 1 MS.Trt_vs_MS.NoTrt_B |
| COMMD6     | 0.00484 | 0.67633 | 0.34  | 0.53 | 1 MS.Trt_vs_MS.NoTrt_B |
| CWF19L1    | 0.00487 | -0.4484 | 0.699 | 0.83 | 1 MS.Trt_vs_MS.NoTrt_B |
| PLS3       | 0.00489 | 0.4617  | 0.283 | 0.43 | 1 MS.Trt_vs_MS.NoTrt_B |
| C5orf63    | 0.00489 | -0.2895 | 0.257 | 0.37 | 1 MS.Trt_vs_MS.NoTrt_B |
| PRPSAP1    | 0.00491 | -0.3648 | 0.575 | 0.71 | 1 MS.Trt_vs_MS.NoTrt_B |
| CCDC126    | 0.00492 | 1.20824 | 0.072 | 0.15 | 1 MS.Trt_vs_MS.NoTrt_B |
| SULT1A1    | 0.00492 | -0.3196 | 0.464 | 0.6  | 1 MS.Trt_vs_MS.NoTrt_B |
| FAM3A      | 0.00495 | 0.41155 | 0.638 | 0.84 | 1 MS.Trt_vs_MS.NoTrt_B |
| EHD4       | 0.00495 | -0.3529 | 0.309 | 0.41 | 1 MS.Trt_vs_MS.NoTrt_B |
| SPA17      | 0.00496 | -0.4016 | 0.153 | 0.25 | 1 MS.Trt_vs_MS.NoTrt_B |
| RNF135     | 0.00498 | -0.7332 | 0.174 | 0.28 | 1 MS.Trt_vs_MS.NoTrt_B |
| PPT1       | 0.00502 | 0.25051 | 0.17  | 0.27 | 1 MS.Trt_vs_MS.NoTrt_B |
| MED31      | 0.00502 | 0.3836  | 0.076 | 0.15 | 1 MS.Trt_vs_MS.NoTrt_B |
| RBBP8      | 0.00503 | 1.25321 | 0.05  | 0.11 | 1 MS.Trt_vs_MS.NoTrt_B |
| DBN1       | 0.00505 | 0.27586 | 0.209 | 0.12 | 1 MS.Trt_vs_MS.NoTrt_B |
| ITPKB      | 0.00506 | 0.61231 | 0.423 | 0.59 | 1 MS.Trt_vs_MS.NoTrt_B |
| GRAMD1B    | 0.00507 | 0.32358 | 0.292 | 0.41 | 1 MS.Trt_vs_MS.NoTrt_B |
| CEBPZ      | 0.00509 | 0.31657 | 0.17  | 0.28 | 1 MS.Trt_vs_MS.NoTrt_B |
| RUNX2      | 0.00509 | -0.3369 | 0.124 | 0.21 | 1 MS.Trt_vs_MS.NoTrt_B |
| HSPB1      | 0.00511 | 0.32384 | 0.257 | 0.38 | 1 MS.Trt_vs_MS.NoTrt_B |
| STK38L     | 0.00512 | -0.5102 | 0.593 | 0.7  | 1 MS.Trt_vs_MS.NoTrt_B |
| C2orf69    | 0.00514 | -0.3187 | 0.163 | 0.26 | 1 MS.Trt_vs_MS.NoTrt_B |
| EIF2S3     | 0.00514 | 0.67727 | 0.943 | 0.95 | 1 MS.Trt_vs_MS.NoTrt_B |

|           |         |         |       |      |                        |
|-----------|---------|---------|-------|------|------------------------|
| GM2A      | 0.00517 | -1.0239 | 0.462 | 0.57 | 1 MS.Trt_vs_MS.NoTrt_B |
| NPHP3     | 0.00518 | 0.61188 | 0.754 | 0.91 | 1 MS.Trt_vs_MS.NoTrt_B |
| WNK1      | 0.00519 | 0.38017 | 0.41  | 0.57 | 1 MS.Trt_vs_MS.NoTrt_B |
| CARD17    | 0.00519 | -0.3729 | 0.048 | 0.11 | 1 MS.Trt_vs_MS.NoTrt_B |
| GCNT4     | 0.00521 | 1.45505 | 0.501 | 0.43 | 1 MS.Trt_vs_MS.NoTrt_B |
| PCMTD1    | 0.00522 | 0.49916 | 0.224 | 0.35 | 1 MS.Trt_vs_MS.NoTrt_B |
| KIAA0368  | 0.00522 | -0.4798 | 0.148 | 0.24 | 1 MS.Trt_vs_MS.NoTrt_B |
| RNF20     | 0.00524 | -0.7602 | 0.061 | 0.12 | 1 MS.Trt_vs_MS.NoTrt_B |
| UBE2W     | 0.00524 | 0.62832 | 0.499 | 0.64 | 1 MS.Trt_vs_MS.NoTrt_B |
| BLOC1S3   | 0.00524 | 0.29066 | 0.464 | 0.61 | 1 MS.Trt_vs_MS.NoTrt_B |
| WDR45B    | 0.00525 | -0.4006 | 0.333 | 0.45 | 1 MS.Trt_vs_MS.NoTrt_B |
| NIT2      | 0.00527 | 0.30068 | 0.516 | 0.69 | 1 MS.Trt_vs_MS.NoTrt_B |
| TMEM265   | 0.00528 | -0.4223 | 0.048 | 0.11 | 1 MS.Trt_vs_MS.NoTrt_B |
| ZNF292    | 0.00528 | 0.55874 | 0.728 | 0.86 | 1 MS.Trt_vs_MS.NoTrt_B |
| HOMER2    | 0.00528 | 0.7955  | 0.455 | 0.58 | 1 MS.Trt_vs_MS.NoTrt_B |
| ASXL2     | 0.00528 | 0.30126 | 0.113 | 0.2  | 1 MS.Trt_vs_MS.NoTrt_B |
| RABIF     | 0.0053  | -0.2818 | 0.257 | 0.37 | 1 MS.Trt_vs_MS.NoTrt_B |
| CCDC66    | 0.00531 | 0.66883 | 0.505 | 0.65 | 1 MS.Trt_vs_MS.NoTrt_B |
| RPF2      | 0.00532 | -0.3344 | 0.19  | 0.29 | 1 MS.Trt_vs_MS.NoTrt_B |
| TTC1      | 0.00532 | 0.39185 | 0.159 | 0.25 | 1 MS.Trt_vs_MS.NoTrt_B |
| ZNF141    | 0.00533 | -0.3393 | 0.919 | 0.98 | 1 MS.Trt_vs_MS.NoTrt_B |
| DCAF13    | 0.00533 | 0.29015 | 0.503 | 0.62 | 1 MS.Trt_vs_MS.NoTrt_B |
| UTP15     | 0.00533 | -0.3934 | 0.279 | 0.41 | 1 MS.Trt_vs_MS.NoTrt_B |
| CRIP2     | 0.00534 | -0.7126 | 0.096 | 0.17 | 1 MS.Trt_vs_MS.NoTrt_B |
| ALOX12    | 0.00534 | -0.4041 | 0.048 | 0.11 | 1 MS.Trt_vs_MS.NoTrt_B |
| GRK3      | 0.00535 | -0.3038 | 0.246 | 0.34 | 1 MS.Trt_vs_MS.NoTrt_B |
| RGP1      | 0.00535 | -0.5919 | 0.087 | 0.16 | 1 MS.Trt_vs_MS.NoTrt_B |
| EIF3E     | 0.00536 | 0.52587 | 0.455 | 0.62 | 1 MS.Trt_vs_MS.NoTrt_B |
| TXNDC15   | 0.00538 | -0.2923 | 0.514 | 0.64 | 1 MS.Trt_vs_MS.NoTrt_B |
| TRAF3IP2  | 0.0054  | -0.8346 | 0.767 | 0.86 | 1 MS.Trt_vs_MS.NoTrt_B |
| CSRP1     | 0.0054  | -0.5331 | 0.42  | 0.52 | 1 MS.Trt_vs_MS.NoTrt_B |
| BAG6      | 0.00543 | 0.43005 | 0.444 | 0.56 | 1 MS.Trt_vs_MS.NoTrt_B |
| L3MBTL2   | 0.00545 | -0.2643 | 0.597 | 0.75 | 1 MS.Trt_vs_MS.NoTrt_B |
| FBXO48    | 0.00547 | 0.52563 | 0.534 | 0.68 | 1 MS.Trt_vs_MS.NoTrt_B |
| RBM27     | 0.00549 | 0.49589 | 0.087 | 0.16 | 1 MS.Trt_vs_MS.NoTrt_B |
| IQCF3     | 0.00549 | 0.29201 | 0.2   | 0.33 | 1 MS.Trt_vs_MS.NoTrt_B |
| RALGAPB   | 0.00551 | -0.2841 | 0.192 | 0.29 | 1 MS.Trt_vs_MS.NoTrt_B |
| CORO7-PAM | 0.00551 | -0.7456 | 0.076 | 0.15 | 1 MS.Trt_vs_MS.NoTrt_B |
| AMY2B     | 0.00552 | 0.53631 | 0.464 | 0.63 | 1 MS.Trt_vs_MS.NoTrt_B |
| TAF11     | 0.00553 | -0.329  | 0.351 | 0.51 | 1 MS.Trt_vs_MS.NoTrt_B |

|          |         |         |       |      |                        |
|----------|---------|---------|-------|------|------------------------|
| NUDT15   | 0.00557 | -0.2787 | 0.436 | 0.59 | 1 MS.Trt_vs_MS.NoTrt_B |
| SIDT2    | 0.00558 | 0.64892 | 0.654 | 0.79 | 1 MS.Trt_vs_MS.NoTrt_B |
| CXorf40A | 0.00559 | 0.39634 | 0.052 | 0.11 | 1 MS.Trt_vs_MS.NoTrt_B |
| CBX6     | 0.0056  | 0.48329 | 0.366 | 0.53 | 1 MS.Trt_vs_MS.NoTrt_B |
| ZBTB80S  | 0.00562 | -0.2935 | 0.878 | 1    | 1 MS.Trt_vs_MS.NoTrt_B |
| CABIN1   | 0.00565 | -0.3454 | 0.137 | 0.23 | 1 MS.Trt_vs_MS.NoTrt_B |
| RPAP3    | 0.0057  | 0.40814 | 0.532 | 0.69 | 1 MS.Trt_vs_MS.NoTrt_B |
| ZSWIM1   | 0.0057  | 0.28145 | 0.636 | 0.76 | 1 MS.Trt_vs_MS.NoTrt_B |
| ORMDL3   | 0.00572 | -0.7834 | 0.085 | 0.16 | 1 MS.Trt_vs_MS.NoTrt_B |
| CHTOP    | 0.00573 | 0.32323 | 0.44  | 0.59 | 1 MS.Trt_vs_MS.NoTrt_B |
| GPRIN3   | 0.00573 | 0.64684 | 0.346 | 0.49 | 1 MS.Trt_vs_MS.NoTrt_B |
| LYRM2    | 0.00573 | -0.5178 | 0.673 | 0.81 | 1 MS.Trt_vs_MS.NoTrt_B |
| NEDD1    | 0.00574 | -0.4434 | 0.057 | 0.12 | 1 MS.Trt_vs_MS.NoTrt_B |
| MCM8     | 0.00574 | -0.3141 | 0.573 | 0.7  | 1 MS.Trt_vs_MS.NoTrt_B |
| NIPBL    | 0.00575 | 0.51462 | 0.416 | 0.57 | 1 MS.Trt_vs_MS.NoTrt_B |
| VAMP8    | 0.00577 | 0.34068 | 0.227 | 0.37 | 1 MS.Trt_vs_MS.NoTrt_B |
| C21orf58 | 0.00578 | -0.4617 | 0.346 | 0.49 | 1 MS.Trt_vs_MS.NoTrt_B |
| SMIM19   | 0.00578 | 0.69112 | 0.355 | 0.47 | 1 MS.Trt_vs_MS.NoTrt_B |
| ATF1     | 0.00578 | 0.54767 | 0.096 | 0.17 | 1 MS.Trt_vs_MS.NoTrt_B |
| LPGAT1   | 0.00579 | -0.3195 | 0.346 | 0.47 | 1 MS.Trt_vs_MS.NoTrt_B |
| LILRB3   | 0.00579 | -1.5863 | 0.085 | 0.16 | 1 MS.Trt_vs_MS.NoTrt_B |
| DSTN     | 0.0058  | 0.71841 | 0.425 | 0.56 | 1 MS.Trt_vs_MS.NoTrt_B |
| ARL13B   | 0.0058  | -0.6417 | 0.137 | 0.23 | 1 MS.Trt_vs_MS.NoTrt_B |
| ACTR6    | 0.00582 | 0.30754 | 0.412 | 0.54 | 1 MS.Trt_vs_MS.NoTrt_B |
| COQ5     | 0.00583 | -0.5257 | 0.693 | 0.89 | 1 MS.Trt_vs_MS.NoTrt_B |
| SLC16A1  | 0.00584 | -0.5546 | 0.089 | 0.16 | 1 MS.Trt_vs_MS.NoTrt_B |
| DCAF7    | 0.00584 | -0.3536 | 0.229 | 0.32 | 1 MS.Trt_vs_MS.NoTrt_B |
| KCTD18   | 0.00585 | 0.37303 | 0.647 | 0.81 | 1 MS.Trt_vs_MS.NoTrt_B |
| PPP1R11  | 0.00586 | -0.2544 | 0.129 | 0.22 | 1 MS.Trt_vs_MS.NoTrt_B |
| COQ8A    | 0.00586 | -0.9191 | 0.497 | 0.62 | 1 MS.Trt_vs_MS.NoTrt_B |
| EPB41L2  | 0.00586 | -0.9768 | 0.074 | 0.15 | 1 MS.Trt_vs_MS.NoTrt_B |
| HERC1    | 0.00586 | 0.37912 | 0.669 | 0.79 | 1 MS.Trt_vs_MS.NoTrt_B |
| WDTC1    | 0.0059  | -0.5776 | 0.233 | 0.35 | 1 MS.Trt_vs_MS.NoTrt_B |
| LIN54    | 0.00593 | 0.62998 | 0.444 | 0.63 | 1 MS.Trt_vs_MS.NoTrt_B |
| CCDC117  | 0.00594 | 1.08131 | 0.205 | 0.31 | 1 MS.Trt_vs_MS.NoTrt_B |
| NTMT1    | 0.00594 | 0.67677 | 0.129 | 0.22 | 1 MS.Trt_vs_MS.NoTrt_B |
| SETD5    | 0.00596 | 0.38009 | 0.388 | 0.53 | 1 MS.Trt_vs_MS.NoTrt_B |
| APLP2    | 0.00602 | -0.2832 | 0.819 | 0.93 | 1 MS.Trt_vs_MS.NoTrt_B |
| ZNF831   | 0.00602 | 0.27789 | 0.137 | 0.23 | 1 MS.Trt_vs_MS.NoTrt_B |
| SMURF1   | 0.00605 | 0.51306 | 0.074 | 0.15 | 1 MS.Trt_vs_MS.NoTrt_B |

|          |         |         |       |      |                        |
|----------|---------|---------|-------|------|------------------------|
| TAF15    | 0.00607 | -0.3948 | 0.144 | 0.23 | 1 MS.Trt_vs_MS.NoTrt_B |
| ALDH5A1  | 0.00609 | 0.9365  | 0.392 | 0.51 | 1 MS.Trt_vs_MS.NoTrt_B |
| VPS26B   | 0.00611 | -0.3682 | 0.061 | 0.12 | 1 MS.Trt_vs_MS.NoTrt_B |
| SURF2    | 0.00613 | -0.5325 | 0.052 | 0.11 | 1 MS.Trt_vs_MS.NoTrt_B |
| RRBP1    | 0.00614 | 0.54542 | 0.19  | 0.3  | 1 MS.Trt_vs_MS.NoTrt_B |
| ATXN1    | 0.00616 | 0.28695 | 0.288 | 0.41 | 1 MS.Trt_vs_MS.NoTrt_B |
| TARS     | 0.00617 | -0.2556 | 0.135 | 0.22 | 1 MS.Trt_vs_MS.NoTrt_B |
| MECP2    | 0.00618 | 0.3474  | 0.789 | 0.92 | 1 MS.Trt_vs_MS.NoTrt_B |
| NBPF9    | 0.00619 | 0.25154 | 0.575 | 0.72 | 1 MS.Trt_vs_MS.NoTrt_B |
| OTUB1    | 0.0062  | 0.40486 | 0.795 | 0.91 | 1 MS.Trt_vs_MS.NoTrt_B |
| CWC25    | 0.00622 | -0.6677 | 0.257 | 0.35 | 1 MS.Trt_vs_MS.NoTrt_B |
| VPS52    | 0.00622 | -0.4402 | 0.094 | 0.17 | 1 MS.Trt_vs_MS.NoTrt_B |
| THUMPD2  | 0.00625 | -0.3409 | 0.296 | 0.4  | 1 MS.Trt_vs_MS.NoTrt_B |
| MTBP     | 0.00625 | 0.30274 | 0.484 | 0.62 | 1 MS.Trt_vs_MS.NoTrt_B |
| FPR1     | 0.00626 | 0.29078 | 0.32  | 0.45 | 1 MS.Trt_vs_MS.NoTrt_B |
| RNF121   | 0.00631 | -0.3322 | 0.24  | 0.35 | 1 MS.Trt_vs_MS.NoTrt_B |
| SYNRG    | 0.00634 | 0.40051 | 0.871 | 0.96 | 1 MS.Trt_vs_MS.NoTrt_B |
| NUDT3    | 0.00634 | 0.35489 | 0.46  | 0.57 | 1 MS.Trt_vs_MS.NoTrt_B |
| SORL1    | 0.00635 | 0.31074 | 0.673 | 0.78 | 1 MS.Trt_vs_MS.NoTrt_B |
| HHLA1    | 0.00635 | 0.27792 | 0.279 | 0.41 | 1 MS.Trt_vs_MS.NoTrt_B |
| CNOT6L   | 0.00636 | 0.76386 | 0.166 | 0.27 | 1 MS.Trt_vs_MS.NoTrt_B |
| ASMTL    | 0.00637 | -0.5913 | 0.065 | 0.13 | 1 MS.Trt_vs_MS.NoTrt_B |
| NSUN6    | 0.00638 | 0.56747 | 0.549 | 0.69 | 1 MS.Trt_vs_MS.NoTrt_B |
| TTC16    | 0.00642 | 0.85582 | 0.438 | 0.62 | 1 MS.Trt_vs_MS.NoTrt_B |
| TIMELESS | 0.00642 | -0.3253 | 0.172 | 0.27 | 1 MS.Trt_vs_MS.NoTrt_B |
| CKAP2    | 0.00643 | -0.644  | 0.085 | 0.16 | 1 MS.Trt_vs_MS.NoTrt_B |
| ZNF419   | 0.00644 | 0.53611 | 0.656 | 0.81 | 1 MS.Trt_vs_MS.NoTrt_B |
| NUTF2    | 0.00646 | -0.5663 | 0.111 | 0.19 | 1 MS.Trt_vs_MS.NoTrt_B |
| TM9SF1   | 0.00647 | -0.592  | 0.19  | 0.29 | 1 MS.Trt_vs_MS.NoTrt_B |
| ZNF615   | 0.00648 | 0.51312 | 0.331 | 0.46 | 1 MS.Trt_vs_MS.NoTrt_B |
| SLC4A1AP | 0.00651 | 0.30719 | 0.667 | 0.81 | 1 MS.Trt_vs_MS.NoTrt_B |
| C19orf44 | 0.00654 | 0.3664  | 0.255 | 0.37 | 1 MS.Trt_vs_MS.NoTrt_B |
| MCL1     | 0.00654 | 0.26619 | 0.261 | 0.38 | 1 MS.Trt_vs_MS.NoTrt_B |
| TTC22    | 0.00658 | -0.3081 | 0.32  | 0.45 | 1 MS.Trt_vs_MS.NoTrt_B |
| PRKDC    | 0.00659 | 0.48021 | 0.521 | 0.65 | 1 MS.Trt_vs_MS.NoTrt_B |
| NSL1     | 0.00661 | 0.34631 | 0.593 | 0.76 | 1 MS.Trt_vs_MS.NoTrt_B |
| CCDC186  | 0.00662 | 0.51635 | 0.468 | 0.57 | 1 MS.Trt_vs_MS.NoTrt_B |
| C12orf10 | 0.00663 | -0.3522 | 0.113 | 0.2  | 1 MS.Trt_vs_MS.NoTrt_B |
| NCAPD3   | 0.00663 | -0.5471 | 0.05  | 0.11 | 1 MS.Trt_vs_MS.NoTrt_B |
| RNF141   | 0.00664 | -0.384  | 0.285 | 0.41 | 1 MS.Trt_vs_MS.NoTrt_B |

|             |         |         |       |      |                        |
|-------------|---------|---------|-------|------|------------------------|
| FAM127A     | 0.00664 | -0.2589 | 0.065 | 0.13 | 1 MS.Trt_vs_MS.NoTrt_B |
| CDC23       | 0.00664 | -0.9472 | 0.054 | 0.11 | 1 MS.Trt_vs_MS.NoTrt_B |
| PBX4        | 0.00668 | -0.4419 | 0.085 | 0.16 | 1 MS.Trt_vs_MS.NoTrt_B |
| CTD-2192J10 | 0.00668 | -0.3375 | 0.346 | 0.48 | 1 MS.Trt_vs_MS.NoTrt_B |
| NETO2       | 0.00669 | 0.65133 | 0.416 | 0.55 | 1 MS.Trt_vs_MS.NoTrt_B |
| PSMD2       | 0.00669 | -0.5075 | 0.129 | 0.21 | 1 MS.Trt_vs_MS.NoTrt_B |
| SLC15A1     | 0.0067  | 0.33817 | 0.791 | 0.74 | 1 MS.Trt_vs_MS.NoTrt_B |
| RBM6        | 0.0067  | 0.33821 | 0.765 | 0.9  | 1 MS.Trt_vs_MS.NoTrt_B |
| NBEAL2      | 0.00676 | -0.268  | 0.135 | 0.22 | 1 MS.Trt_vs_MS.NoTrt_B |
| RBM39       | 0.00677 | 0.25615 | 0.789 | 0.95 | 1 MS.Trt_vs_MS.NoTrt_B |
| DIXDC1      | 0.00678 | 0.26805 | 0.172 | 0.28 | 1 MS.Trt_vs_MS.NoTrt_B |
| C15orf53    | 0.00681 | -0.3255 | 0.046 | 0.1  | 1 MS.Trt_vs_MS.NoTrt_B |
| ARRDC1      | 0.00682 | -0.2841 | 0.172 | 0.27 | 1 MS.Trt_vs_MS.NoTrt_B |
| BPHL        | 0.00682 | 0.35919 | 0.444 | 0.6  | 1 MS.Trt_vs_MS.NoTrt_B |
| SNX11       | 0.00683 | 0.42396 | 0.501 | 0.65 | 1 MS.Trt_vs_MS.NoTrt_B |
| NUMBL       | 0.00685 | -0.4678 | 0.466 | 0.58 | 1 MS.Trt_vs_MS.NoTrt_B |
| NDUFB6      | 0.00688 | 0.34064 | 0.442 | 0.56 | 1 MS.Trt_vs_MS.NoTrt_B |
| TMEM53      | 0.00688 | 0.85852 | 0.218 | 0.34 | 1 MS.Trt_vs_MS.NoTrt_B |
| CYP51A1     | 0.0069  | -0.3123 | 0.362 | 0.5  | 1 MS.Trt_vs_MS.NoTrt_B |
| ATP6V1H     | 0.00691 | -0.5993 | 0.272 | 0.38 | 1 MS.Trt_vs_MS.NoTrt_B |
| SLC10A7     | 0.00691 | -0.399  | 0.046 | 0.1  | 1 MS.Trt_vs_MS.NoTrt_B |
| CENPM       | 0.00691 | -0.2664 | 0.187 | 0.29 | 1 MS.Trt_vs_MS.NoTrt_B |
| HTATSF1     | 0.00691 | 0.3534  | 0.107 | 0.19 | 1 MS.Trt_vs_MS.NoTrt_B |
| RP11-295P9  | 0.00692 | -0.4105 | 0.05  | 0.11 | 1 MS.Trt_vs_MS.NoTrt_B |
| RNF40       | 0.00693 | -0.4537 | 0.065 | 0.13 | 1 MS.Trt_vs_MS.NoTrt_B |
| ATAD5       | 0.00693 | 0.55722 | 0.429 | 0.58 | 1 MS.Trt_vs_MS.NoTrt_B |
| CD46        | 0.00693 | 0.28712 | 0.688 | 0.84 | 1 MS.Trt_vs_MS.NoTrt_B |
| PABPC1L     | 0.00697 | -0.9913 | 0.2   | 0.31 | 1 MS.Trt_vs_MS.NoTrt_B |
| MYO10       | 0.00699 | -0.3277 | 0.586 | 0.77 | 1 MS.Trt_vs_MS.NoTrt_B |
| PYGM        | 0.00703 | 0.67633 | 0.536 | 0.69 | 1 MS.Trt_vs_MS.NoTrt_B |
| KIAA0100    | 0.00707 | 0.53913 | 0.375 | 0.5  | 1 MS.Trt_vs_MS.NoTrt_B |
| TPMT        | 0.00707 | 0.67027 | 0.61  | 0.75 | 1 MS.Trt_vs_MS.NoTrt_B |
| STK11       | 0.0071  | -0.3067 | 0.251 | 0.36 | 1 MS.Trt_vs_MS.NoTrt_B |
| USP54       | 0.00711 | 0.40553 | 0.479 | 0.63 | 1 MS.Trt_vs_MS.NoTrt_B |
| MRPL57      | 0.00712 | 0.29591 | 0.632 | 0.71 | 1 MS.Trt_vs_MS.NoTrt_B |
| ZNF540      | 0.00715 | 0.87653 | 0.336 | 0.46 | 1 MS.Trt_vs_MS.NoTrt_B |
| PPP1R16A    | 0.0072  | 0.94853 | 0.331 | 0.45 | 1 MS.Trt_vs_MS.NoTrt_B |
| MCM5        | 0.00723 | -0.299  | 0.146 | 0.23 | 1 MS.Trt_vs_MS.NoTrt_B |
| TSPOAP1     | 0.00727 | -0.5459 | 0.131 | 0.22 | 1 MS.Trt_vs_MS.NoTrt_B |
| ERAP1       | 0.00728 | 0.43354 | 0.451 | 0.62 | 1 MS.Trt_vs_MS.NoTrt_B |

|          |         |         |       |      |                        |
|----------|---------|---------|-------|------|------------------------|
| PRR14L   | 0.00728 | 0.46269 | 0.301 | 0.42 | 1 MS.Trt_vs_MS.NoTrt_B |
| NPHP1    | 0.00728 | 0.32123 | 0.549 | 0.67 | 1 MS.Trt_vs_MS.NoTrt_B |
| PIK3AP1  | 0.00728 | 1.04413 | 0.076 | 0.15 | 1 MS.Trt_vs_MS.NoTrt_B |
| EMC1     | 0.0073  | -0.4836 | 0.654 | 0.77 | 1 MS.Trt_vs_MS.NoTrt_B |
| PRRC2C   | 0.00731 | 0.31861 | 0.656 | 0.82 | 1 MS.Trt_vs_MS.NoTrt_B |
| UQCC1    | 0.00731 | 0.28105 | 0.397 | 0.52 | 1 MS.Trt_vs_MS.NoTrt_B |
| UPF3A    | 0.00733 | 0.51364 | 0.617 | 0.77 | 1 MS.Trt_vs_MS.NoTrt_B |
| NUBPL    | 0.00736 | -0.2527 | 0.597 | 0.74 | 1 MS.Trt_vs_MS.NoTrt_B |
| MYBBP1A  | 0.00743 | -0.6249 | 0.092 | 0.16 | 1 MS.Trt_vs_MS.NoTrt_B |
| ANAPC4   | 0.00743 | -0.5189 | 0.176 | 0.27 | 1 MS.Trt_vs_MS.NoTrt_B |
| CCNF     | 0.00743 | 0.60408 | 0.336 | 0.46 | 1 MS.Trt_vs_MS.NoTrt_B |
| HSBP1    | 0.00743 | 0.69443 | 0.503 | 0.64 | 1 MS.Trt_vs_MS.NoTrt_B |
| RAB1A    | 0.00744 | 0.62219 | 0.096 | 0.17 | 1 MS.Trt_vs_MS.NoTrt_B |
| SMN1     | 0.00745 | 0.49463 | 0.296 | 0.42 | 1 MS.Trt_vs_MS.NoTrt_B |
| ZFYVE26  | 0.00746 | -0.3639 | 0.708 | 0.86 | 1 MS.Trt_vs_MS.NoTrt_B |
| BDH1     | 0.00747 | 0.36936 | 0.789 | 0.94 | 1 MS.Trt_vs_MS.NoTrt_B |
| ATG4B    | 0.00747 | -0.4431 | 0.129 | 0.21 | 1 MS.Trt_vs_MS.NoTrt_B |
| ADAM19   | 0.00747 | 0.29784 | 0.312 | 0.43 | 1 MS.Trt_vs_MS.NoTrt_B |
| NUDC     | 0.0075  | 0.45088 | 0.468 | 0.62 | 1 MS.Trt_vs_MS.NoTrt_B |
| NR1D2    | 0.0075  | 0.43282 | 0.076 | 0.15 | 1 MS.Trt_vs_MS.NoTrt_B |
| ATP9B    | 0.00752 | 0.28863 | 0.8   | 0.93 | 1 MS.Trt_vs_MS.NoTrt_B |
| CLMP     | 0.00752 | 0.63841 | 0.268 | 0.4  | 1 MS.Trt_vs_MS.NoTrt_B |
| SRGAP3   | 0.00753 | 0.40515 | 0.752 | 0.9  | 1 MS.Trt_vs_MS.NoTrt_B |
| EIF1AX   | 0.00753 | 0.56103 | 0.218 | 0.32 | 1 MS.Trt_vs_MS.NoTrt_B |
| ATP6V1B2 | 0.00755 | 0.41811 | 0.521 | 0.67 | 1 MS.Trt_vs_MS.NoTrt_B |
| PICK1    | 0.00755 | 0.79747 | 0.316 | 0.43 | 1 MS.Trt_vs_MS.NoTrt_B |
| FGFR1OP  | 0.00756 | 0.52334 | 0.704 | 0.81 | 1 MS.Trt_vs_MS.NoTrt_B |
| BCAS3    | 0.00759 | -0.4305 | 0.743 | 0.85 | 1 MS.Trt_vs_MS.NoTrt_B |
| MRS2     | 0.00761 | -0.7474 | 0.708 | 0.77 | 1 MS.Trt_vs_MS.NoTrt_B |
| SETD3    | 0.00761 | -0.6729 | 0.059 | 0.12 | 1 MS.Trt_vs_MS.NoTrt_B |
| FAM120C  | 0.00763 | 0.46418 | 0.155 | 0.25 | 1 MS.Trt_vs_MS.NoTrt_B |
| TXNL4B   | 0.00765 | -0.2952 | 0.257 | 0.37 | 1 MS.Trt_vs_MS.NoTrt_B |
| TP53BP2  | 0.00765 | 0.39899 | 0.102 | 0.18 | 1 MS.Trt_vs_MS.NoTrt_B |
| PDPR     | 0.00765 | -0.2696 | 0.312 | 0.42 | 1 MS.Trt_vs_MS.NoTrt_B |
| NOC2L    | 0.00768 | 0.27621 | 0.625 | 0.77 | 1 MS.Trt_vs_MS.NoTrt_B |
| RANBP2   | 0.00769 | 0.43724 | 0.266 | 0.38 | 1 MS.Trt_vs_MS.NoTrt_B |
| CYP2R1   | 0.00771 | -0.9995 | 0.068 | 0.13 | 1 MS.Trt_vs_MS.NoTrt_B |
| PIGC     | 0.00773 | -0.5593 | 0.092 | 0.16 | 1 MS.Trt_vs_MS.NoTrt_B |
| NDUFV2   | 0.00774 | 0.3897  | 0.349 | 0.48 | 1 MS.Trt_vs_MS.NoTrt_B |
| NEIL3    | 0.00775 | -0.5238 | 0.198 | 0.3  | 1 MS.Trt_vs_MS.NoTrt_B |

|            |         |         |       |      |                        |
|------------|---------|---------|-------|------|------------------------|
| EFNA5      | 0.00777 | -0.3283 | 0.281 | 0.18 | 1 MS.Trt_vs_MS.NoTrt_B |
| NIPAL3     | 0.00778 | 0.30818 | 0.647 | 0.77 | 1 MS.Trt_vs_MS.NoTrt_B |
| ZNF581     | 0.0078  | -0.7129 | 0.05  | 0.11 | 1 MS.Trt_vs_MS.NoTrt_B |
| LACTB      | 0.00784 | -0.4251 | 0.458 | 0.58 | 1 MS.Trt_vs_MS.NoTrt_B |
| IGSF9      | 0.00787 | -0.2582 | 0.17  | 0.27 | 1 MS.Trt_vs_MS.NoTrt_B |
| MKRN2      | 0.00787 | -0.3633 | 0.065 | 0.13 | 1 MS.Trt_vs_MS.NoTrt_B |
| DGKE       | 0.00788 | 0.35659 | 0.603 | 0.74 | 1 MS.Trt_vs_MS.NoTrt_B |
| BIVM       | 0.00788 | 0.79675 | 0.218 | 0.32 | 1 MS.Trt_vs_MS.NoTrt_B |
| DDX41      | 0.00792 | -0.8782 | 0.068 | 0.13 | 1 MS.Trt_vs_MS.NoTrt_B |
| STAMBPL1   | 0.00793 | 0.36098 | 0.346 | 0.48 | 1 MS.Trt_vs_MS.NoTrt_B |
| POLR2J2    | 0.00794 | 0.32619 | 0.27  | 0.38 | 1 MS.Trt_vs_MS.NoTrt_B |
| SHPRH      | 0.00794 | 0.63458 | 0.501 | 0.67 | 1 MS.Trt_vs_MS.NoTrt_B |
| FBXO46     | 0.00794 | -0.2532 | 0.168 | 0.26 | 1 MS.Trt_vs_MS.NoTrt_B |
| ELOVL6     | 0.00796 | -1.4948 | 0.205 | 0.3  | 1 MS.Trt_vs_MS.NoTrt_B |
| RANGRF     | 0.00798 | -0.2836 | 0.065 | 0.13 | 1 MS.Trt_vs_MS.NoTrt_B |
| GSTCD      | 0.00798 | 0.28245 | 0.46  | 0.63 | 1 MS.Trt_vs_MS.NoTrt_B |
| TET2       | 0.00799 | 0.94881 | 0.355 | 0.51 | 1 MS.Trt_vs_MS.NoTrt_B |
| SOX6       | 0.00804 | -0.4593 | 0.29  | 0.39 | 1 MS.Trt_vs_MS.NoTrt_B |
| ACAD8      | 0.00804 | 0.3651  | 0.403 | 0.54 | 1 MS.Trt_vs_MS.NoTrt_B |
| ZFYVE28    | 0.00805 | 0.26337 | 0.081 | 0.15 | 1 MS.Trt_vs_MS.NoTrt_B |
| ZNF383     | 0.00807 | -0.2773 | 0.941 | 0.97 | 1 MS.Trt_vs_MS.NoTrt_B |
| LINC00854  | 0.00809 | -0.3337 | 0.512 | 0.63 | 1 MS.Trt_vs_MS.NoTrt_B |
| ARHGAP8    | 0.00809 | -0.3868 | 0.549 | 0.71 | 1 MS.Trt_vs_MS.NoTrt_B |
| AL589743.1 | 0.00813 | -0.5008 | 0.425 | 0.55 | 1 MS.Trt_vs_MS.NoTrt_B |
| PNISR      | 0.00814 | 0.34242 | 0.479 | 0.67 | 1 MS.Trt_vs_MS.NoTrt_B |
| SULT1A4    | 0.00814 | -0.2703 | 0.205 | 0.3  | 1 MS.Trt_vs_MS.NoTrt_B |
| MCTP2      | 0.00816 | 0.52704 | 0.27  | 0.41 | 1 MS.Trt_vs_MS.NoTrt_B |
| RABL6      | 0.00818 | 1.0937  | 0.42  | 0.52 | 1 MS.Trt_vs_MS.NoTrt_B |
| LHPP       | 0.00821 | -0.2869 | 0.094 | 0.17 | 1 MS.Trt_vs_MS.NoTrt_B |
| TPP1       | 0.00822 | 0.35864 | 0.27  | 0.38 | 1 MS.Trt_vs_MS.NoTrt_B |
| ZNF71      | 0.00823 | 0.50553 | 0.157 | 0.25 | 1 MS.Trt_vs_MS.NoTrt_B |
| CHURC1-FN  | 0.00823 | 0.29164 | 0.161 | 0.26 | 1 MS.Trt_vs_MS.NoTrt_B |
| FAM47E     | 0.00824 | 0.31354 | 0.549 | 0.69 | 1 MS.Trt_vs_MS.NoTrt_B |
| LEMD3      | 0.00829 | -0.2667 | 0.503 | 0.64 | 1 MS.Trt_vs_MS.NoTrt_B |
| CALR       | 0.00831 | -0.4049 | 0.702 | 0.82 | 1 MS.Trt_vs_MS.NoTrt_B |
| ZNF76      | 0.00832 | -0.4269 | 0.109 | 0.18 | 1 MS.Trt_vs_MS.NoTrt_B |
| CELF5      | 0.00833 | -0.5383 | 0.179 | 0.28 | 1 MS.Trt_vs_MS.NoTrt_B |
| RCCD1      | 0.00835 | -0.3351 | 0.102 | 0.18 | 1 MS.Trt_vs_MS.NoTrt_B |
| DNAJC15    | 0.00837 | -0.5751 | 0.126 | 0.21 | 1 MS.Trt_vs_MS.NoTrt_B |
| ING4       | 0.00837 | -0.4403 | 0.214 | 0.31 | 1 MS.Trt_vs_MS.NoTrt_B |



|            |         |         |       |      |                        |
|------------|---------|---------|-------|------|------------------------|
| C1orf35    | 0.00839 | -0.3808 | 0.17  | 0.25 | 1 MS.Trt_vs_MS.NoTrt_B |
| SHTN1      | 0.00839 | 0.39441 | 0.05  | 0.11 | 1 MS.Trt_vs_MS.NoTrt_B |
| ZNF773     | 0.00845 | -1.0232 | 0.464 | 0.56 | 1 MS.Trt_vs_MS.NoTrt_B |
| USP28      | 0.00847 | -0.4424 | 0.266 | 0.38 | 1 MS.Trt_vs_MS.NoTrt_B |
| METRNL     | 0.00848 | 0.29242 | 0.059 | 0.12 | 1 MS.Trt_vs_MS.NoTrt_B |
| MUS81      | 0.00848 | -0.4834 | 0.092 | 0.16 | 1 MS.Trt_vs_MS.NoTrt_B |
| ARPC4-TTL1 | 0.00853 | -0.4239 | 0.054 | 0.11 | 1 MS.Trt_vs_MS.NoTrt_B |
| PRKCSH     | 0.00854 | 0.33361 | 0.623 | 0.77 | 1 MS.Trt_vs_MS.NoTrt_B |
| HMGX3      | 0.00858 | 0.38867 | 0.194 | 0.29 | 1 MS.Trt_vs_MS.NoTrt_B |
| SPOUT1     | 0.00858 | -0.4401 | 0.098 | 0.17 | 1 MS.Trt_vs_MS.NoTrt_B |
| SCYL2      | 0.0086  | -0.4624 | 0.074 | 0.14 | 1 MS.Trt_vs_MS.NoTrt_B |
| NFATC2     | 0.00861 | 0.3016  | 0.094 | 0.17 | 1 MS.Trt_vs_MS.NoTrt_B |
| SMARCA2    | 0.00862 | 0.5051  | 0.305 | 0.43 | 1 MS.Trt_vs_MS.NoTrt_B |
| HJURP      | 0.00863 | -0.9551 | 0.275 | 0.39 | 1 MS.Trt_vs_MS.NoTrt_B |
| MED18      | 0.00863 | -0.3766 | 0.447 | 0.59 | 1 MS.Trt_vs_MS.NoTrt_B |
| MAPRE1     | 0.00864 | -0.2585 | 0.118 | 0.2  | 1 MS.Trt_vs_MS.NoTrt_B |
| ST3GAL5    | 0.00864 | 0.33231 | 0.229 | 0.33 | 1 MS.Trt_vs_MS.NoTrt_B |
| MKL2       | 0.00864 | 0.35833 | 0.573 | 0.72 | 1 MS.Trt_vs_MS.NoTrt_B |
| CARD8      | 0.00864 | 0.32461 | 0.786 | 0.89 | 1 MS.Trt_vs_MS.NoTrt_B |
| RABL3      | 0.00864 | 0.27352 | 0.525 | 0.67 | 1 MS.Trt_vs_MS.NoTrt_B |
| PHB2       | 0.00869 | -0.3327 | 0.135 | 0.22 | 1 MS.Trt_vs_MS.NoTrt_B |
| NDUFB8     | 0.00871 | 0.51421 | 0.316 | 0.47 | 1 MS.Trt_vs_MS.NoTrt_B |
| FBXO31     | 0.00871 | 0.41162 | 0.2   | 0.31 | 1 MS.Trt_vs_MS.NoTrt_B |
| NUFIP2     | 0.00871 | 0.45943 | 0.325 | 0.46 | 1 MS.Trt_vs_MS.NoTrt_B |
| DDHD1      | 0.00879 | 0.55476 | 0.786 | 0.95 | 1 MS.Trt_vs_MS.NoTrt_B |
| LSM8       | 0.0088  | 0.63182 | 0.754 | 0.89 | 1 MS.Trt_vs_MS.NoTrt_B |
| SH3PXD2A   | 0.00883 | 0.62995 | 0.172 | 0.27 | 1 MS.Trt_vs_MS.NoTrt_B |
| IRAK4      | 0.00883 | 0.47028 | 0.471 | 0.58 | 1 MS.Trt_vs_MS.NoTrt_B |
| KDM5D      | 0.00885 | -2.8482 | 0.22  | 0.31 | 1 MS.Trt_vs_MS.NoTrt_B |
| RSL24D1    | 0.0089  | 0.45888 | 0.24  | 0.35 | 1 MS.Trt_vs_MS.NoTrt_B |
| PDZD11     | 0.00892 | -0.3467 | 0.059 | 0.12 | 1 MS.Trt_vs_MS.NoTrt_B |
| EFCAB5     | 0.00892 | 0.54816 | 0.312 | 0.44 | 1 MS.Trt_vs_MS.NoTrt_B |
| MAP3K13    | 0.00893 | -0.252  | 0.725 | 0.85 | 1 MS.Trt_vs_MS.NoTrt_B |
| RPP30      | 0.009   | 0.40643 | 0.514 | 0.65 | 1 MS.Trt_vs_MS.NoTrt_B |
| MTMR6      | 0.00901 | -0.7329 | 0.061 | 0.12 | 1 MS.Trt_vs_MS.NoTrt_B |
| PDS5B      | 0.00906 | 0.55589 | 0.272 | 0.38 | 1 MS.Trt_vs_MS.NoTrt_B |
| GPKOW      | 0.00908 | -0.2899 | 0.054 | 0.11 | 1 MS.Trt_vs_MS.NoTrt_B |
| NUDT6      | 0.00914 | 0.28038 | 0.39  | 0.55 | 1 MS.Trt_vs_MS.NoTrt_B |
| PORCN      | 0.00918 | -0.9867 | 0.048 | 0.1  | 1 MS.Trt_vs_MS.NoTrt_B |
| STRN4      | 0.00922 | -0.4617 | 0.368 | 0.48 | 1 MS.Trt_vs_MS.NoTrt_B |

|           |         |         |       |      |                        |
|-----------|---------|---------|-------|------|------------------------|
| ANKMY1    | 0.00924 | -0.3246 | 0.318 | 0.43 | 1 MS.Trt_vs_MS.NoTrt_B |
| RNF2      | 0.00929 | -0.5717 | 0.327 | 0.45 | 1 MS.Trt_vs_MS.NoTrt_B |
| C8orf44   | 0.0093  | 0.49604 | 0.407 | 0.57 | 1 MS.Trt_vs_MS.NoTrt_B |
| CAPN7     | 0.0093  | 0.41669 | 0.429 | 0.58 | 1 MS.Trt_vs_MS.NoTrt_B |
| SUGP1     | 0.00931 | -0.3013 | 0.351 | 0.48 | 1 MS.Trt_vs_MS.NoTrt_B |
| ALPK1     | 0.00932 | 0.42757 | 0.571 | 0.76 | 1 MS.Trt_vs_MS.NoTrt_B |
| COQ9      | 0.00933 | -0.6975 | 0.048 | 0.1  | 1 MS.Trt_vs_MS.NoTrt_B |
| GADD45B   | 0.00934 | -0.8378 | 0.065 | 0.12 | 1 MS.Trt_vs_MS.NoTrt_B |
| SLC12A7   | 0.00935 | -0.4071 | 0.083 | 0.15 | 1 MS.Trt_vs_MS.NoTrt_B |
| GSDMB     | 0.00935 | -0.3491 | 0.756 | 0.89 | 1 MS.Trt_vs_MS.NoTrt_B |
| SRSF10    | 0.00936 | 0.48139 | 0.643 | 0.79 | 1 MS.Trt_vs_MS.NoTrt_B |
| TRAF5     | 0.00937 | 0.49004 | 0.562 | 0.72 | 1 MS.Trt_vs_MS.NoTrt_B |
| PIP4K2A   | 0.00937 | 0.49325 | 0.699 | 0.87 | 1 MS.Trt_vs_MS.NoTrt_B |
| ATIC      | 0.00943 | 0.29505 | 0.301 | 0.41 | 1 MS.Trt_vs_MS.NoTrt_B |
| ADAMTSL4  | 0.00944 | 0.35475 | 0.196 | 0.29 | 1 MS.Trt_vs_MS.NoTrt_B |
| PINLYP    | 0.00946 | 0.27366 | 0.442 | 0.61 | 1 MS.Trt_vs_MS.NoTrt_B |
| ZNF680    | 0.00954 | 1.03205 | 0.061 | 0.12 | 1 MS.Trt_vs_MS.NoTrt_B |
| EFCAB11   | 0.00956 | 0.39089 | 0.643 | 0.8  | 1 MS.Trt_vs_MS.NoTrt_B |
| TAF7      | 0.00956 | 0.33662 | 0.285 | 0.4  | 1 MS.Trt_vs_MS.NoTrt_B |
| LYRM7     | 0.00958 | 0.47646 | 0.808 | 0.91 | 1 MS.Trt_vs_MS.NoTrt_B |
| CHGB      | 0.00959 | -0.5054 | 0.309 | 0.41 | 1 MS.Trt_vs_MS.NoTrt_B |
| SLC25A19  | 0.00962 | -0.3174 | 0.305 | 0.41 | 1 MS.Trt_vs_MS.NoTrt_B |
| SEC22C    | 0.00965 | -0.4116 | 0.523 | 0.67 | 1 MS.Trt_vs_MS.NoTrt_B |
| MEF2A     | 0.00972 | -0.4471 | 0.359 | 0.48 | 1 MS.Trt_vs_MS.NoTrt_B |
| NRAS      | 0.00973 | -0.8176 | 0.207 | 0.31 | 1 MS.Trt_vs_MS.NoTrt_B |
| GTF2IRD1  | 0.00976 | -0.5805 | 0.525 | 0.64 | 1 MS.Trt_vs_MS.NoTrt_B |
| IL15      | 0.00978 | -0.3543 | 0.307 | 0.42 | 1 MS.Trt_vs_MS.NoTrt_B |
| ZNF330    | 0.00982 | -0.3329 | 0.048 | 0.1  | 1 MS.Trt_vs_MS.NoTrt_B |
| CPT1A     | 0.00983 | -0.4772 | 0.551 | 0.62 | 1 MS.Trt_vs_MS.NoTrt_B |
| ZDHHC13   | 0.00983 | 0.79939 | 0.595 | 0.75 | 1 MS.Trt_vs_MS.NoTrt_B |
| ISCA2     | 0.00986 | 0.40367 | 0.412 | 0.54 | 1 MS.Trt_vs_MS.NoTrt_B |
| AIG1      | 0.00988 | -0.4493 | 0.453 | 0.6  | 1 MS.Trt_vs_MS.NoTrt_B |
| OR8H2     | 0.00989 | -0.4417 | 0.12  | 0.2  | 1 MS.Trt_vs_MS.NoTrt_B |
| HNRNPAB   | 0.00996 | -0.3782 | 0.096 | 0.17 | 1 MS.Trt_vs_MS.NoTrt_B |
| TBC1D14   | 0.00996 | -0.2692 | 0.146 | 0.23 | 1 MS.Trt_vs_MS.NoTrt_B |
| XRCC5     | 0.01001 | 0.27469 | 0.429 | 0.56 | 1 MS.Trt_vs_MS.NoTrt_B |
| PNKD      | 0.01002 | 0.34097 | 0.098 | 0.17 | 1 MS.Trt_vs_MS.NoTrt_B |
| TGFB11    | 0.01003 | -1.0107 | 0.166 | 0.25 | 1 MS.Trt_vs_MS.NoTrt_B |
| 3-Mar     | 0.01008 | -0.4226 | 0.259 | 0.36 | 1 MS.Trt_vs_MS.NoTrt_B |
| TEN1-CDK3 | 0.01009 | 0.80764 | 0.377 | 0.49 | 1 MS.Trt_vs_MS.NoTrt_B |

|            |         |         |       |      |                        |
|------------|---------|---------|-------|------|------------------------|
| AP2A2      | 0.01009 | 0.43638 | 0.49  | 0.64 | 1 MS.Trt_vs_MS.NoTrt_B |
| ZNF410     | 0.01009 | -0.3833 | 0.386 | 0.5  | 1 MS.Trt_vs_MS.NoTrt_B |
| HSD17B1    | 0.0101  | 0.39709 | 0.621 | 0.8  | 1 MS.Trt_vs_MS.NoTrt_B |
| MOB3B      | 0.0101  | 0.26005 | 0.42  | 0.56 | 1 MS.Trt_vs_MS.NoTrt_B |
| HGSNAT     | 0.01012 | -0.4806 | 0.558 | 0.67 | 1 MS.Trt_vs_MS.NoTrt_B |
| OSTC       | 0.01013 | 0.34433 | 0.176 | 0.27 | 1 MS.Trt_vs_MS.NoTrt_B |
| ZNF652     | 0.01016 | 0.5816  | 0.418 | 0.53 | 1 MS.Trt_vs_MS.NoTrt_B |
| NCKAP1     | 0.01028 | 0.38128 | 0.536 | 0.7  | 1 MS.Trt_vs_MS.NoTrt_B |
| REC8       | 0.0103  | -0.3556 | 0.048 | 0.1  | 1 MS.Trt_vs_MS.NoTrt_B |
| PROSER1    | 0.0103  | -0.3103 | 0.12  | 0.2  | 1 MS.Trt_vs_MS.NoTrt_B |
| OXR1       | 0.01034 | 0.46127 | 0.211 | 0.32 | 1 MS.Trt_vs_MS.NoTrt_B |
| DENND1B    | 0.01035 | 0.31964 | 0.096 | 0.17 | 1 MS.Trt_vs_MS.NoTrt_B |
| CHRN1      | 0.01035 | 0.54266 | 0.475 | 0.64 | 1 MS.Trt_vs_MS.NoTrt_B |
| MRPS26     | 0.01037 | -0.4187 | 0.068 | 0.13 | 1 MS.Trt_vs_MS.NoTrt_B |
| SRP54      | 0.01041 | 0.51274 | 0.131 | 0.21 | 1 MS.Trt_vs_MS.NoTrt_B |
| TIMD4      | 0.01042 | 0.26312 | 0.048 | 0.1  | 1 MS.Trt_vs_MS.NoTrt_B |
| PLEKHG4    | 0.01053 | -0.4821 | 0.111 | 0.18 | 1 MS.Trt_vs_MS.NoTrt_B |
| ZFP36L1    | 0.01054 | 0.85386 | 0.702 | 0.69 | 1 MS.Trt_vs_MS.NoTrt_B |
| MIIP       | 0.01054 | -0.2896 | 0.105 | 0.18 | 1 MS.Trt_vs_MS.NoTrt_B |
| DCTN6      | 0.01056 | -0.4105 | 0.427 | 0.55 | 1 MS.Trt_vs_MS.NoTrt_B |
| PPP2CB     | 0.01057 | 0.71528 | 0.46  | 0.6  | 1 MS.Trt_vs_MS.NoTrt_B |
| LRRC34     | 0.01058 | 0.26965 | 0.503 | 0.65 | 1 MS.Trt_vs_MS.NoTrt_B |
| NUP54      | 0.01058 | -0.4472 | 0.133 | 0.21 | 1 MS.Trt_vs_MS.NoTrt_B |
| PSMB6      | 0.01064 | 0.36496 | 0.582 | 0.7  | 1 MS.Trt_vs_MS.NoTrt_B |
| LYPLAL1    | 0.01066 | 0.33828 | 0.063 | 0.12 | 1 MS.Trt_vs_MS.NoTrt_B |
| TAF9B      | 0.01069 | 0.36042 | 0.107 | 0.18 | 1 MS.Trt_vs_MS.NoTrt_B |
| CTD-3088G3 | 0.01073 | 0.96828 | 0.37  | 0.5  | 1 MS.Trt_vs_MS.NoTrt_B |
| MINPP1     | 0.01073 | -0.5044 | 0.068 | 0.13 | 1 MS.Trt_vs_MS.NoTrt_B |
| MED24      | 0.01074 | 0.31899 | 0.458 | 0.57 | 1 MS.Trt_vs_MS.NoTrt_B |
| E2F4       | 0.01075 | -0.8028 | 0.089 | 0.16 | 1 MS.Trt_vs_MS.NoTrt_B |
| POLR3B     | 0.01078 | -0.9783 | 0.065 | 0.12 | 1 MS.Trt_vs_MS.NoTrt_B |
| TEX2       | 0.0108  | -0.579  | 0.573 | 0.68 | 1 MS.Trt_vs_MS.NoTrt_B |
| ZNF558     | 0.01084 | 0.42228 | 0.545 | 0.69 | 1 MS.Trt_vs_MS.NoTrt_B |
| FAM161B    | 0.01089 | 0.42071 | 0.261 | 0.37 | 1 MS.Trt_vs_MS.NoTrt_B |
| GPATCH11   | 0.01097 | 0.63455 | 0.346 | 0.47 | 1 MS.Trt_vs_MS.NoTrt_B |
| LAMTOR3    | 0.011   | 1.36654 | 0.231 | 0.34 | 1 MS.Trt_vs_MS.NoTrt_B |
| ASB13      | 0.01108 | 0.8311  | 0.105 | 0.18 | 1 MS.Trt_vs_MS.NoTrt_B |
| ELMSAN1    | 0.01109 | 0.44032 | 0.551 | 0.68 | 1 MS.Trt_vs_MS.NoTrt_B |
| PDE4B      | 0.0111  | 0.38635 | 0.207 | 0.31 | 1 MS.Trt_vs_MS.NoTrt_B |
| SMARCAL1   | 0.01112 | -0.4389 | 0.564 | 0.68 | 1 MS.Trt_vs_MS.NoTrt_B |

|         |         |         |       |      |                        |
|---------|---------|---------|-------|------|------------------------|
| CTDSP2  | 0.01116 | 0.41911 | 0.159 | 0.25 | 1 MS.Trt_vs_MS.NoTrt_B |
| PGM2    | 0.01119 | -0.5423 | 0.061 | 0.12 | 1 MS.Trt_vs_MS.NoTrt_B |
| ARFGEF1 | 0.0112  | 0.40969 | 0.527 | 0.64 | 1 MS.Trt_vs_MS.NoTrt_B |
| USP24   | 0.01123 | 0.30214 | 0.251 | 0.36 | 1 MS.Trt_vs_MS.NoTrt_B |
| ING1    | 0.01125 | 0.87416 | 0.499 | 0.61 | 1 MS.Trt_vs_MS.NoTrt_B |
| STYX    | 0.01126 | 0.5854  | 0.444 | 0.57 | 1 MS.Trt_vs_MS.NoTrt_B |
| LZIC    | 0.01127 | 0.4269  | 0.684 | 0.85 | 1 MS.Trt_vs_MS.NoTrt_B |
| BRMS1   | 0.0113  | -0.2848 | 0.098 | 0.17 | 1 MS.Trt_vs_MS.NoTrt_B |
| PSMD10  | 0.01132 | 0.36802 | 0.207 | 0.3  | 1 MS.Trt_vs_MS.NoTrt_B |
| KLHL2   | 0.01132 | 0.25116 | 0.242 | 0.34 | 1 MS.Trt_vs_MS.NoTrt_B |
| PPP4R1  | 0.01136 | -0.9325 | 0.166 | 0.25 | 1 MS.Trt_vs_MS.NoTrt_B |
| CAMK2D  | 0.0114  | 0.54593 | 0.196 | 0.3  | 1 MS.Trt_vs_MS.NoTrt_B |
| SLC43A3 | 0.01147 | -0.4245 | 0.298 | 0.4  | 1 MS.Trt_vs_MS.NoTrt_B |
| ZC3H4   | 0.01148 | 0.89637 | 0.292 | 0.42 | 1 MS.Trt_vs_MS.NoTrt_B |
| DDT     | 0.01156 | -0.2568 | 0.122 | 0.2  | 1 MS.Trt_vs_MS.NoTrt_B |
| TIAL1   | 0.01157 | 1.00925 | 0.743 | 0.89 | 1 MS.Trt_vs_MS.NoTrt_B |
| TTC34   | 0.01158 | 0.51647 | 0.124 | 0.21 | 1 MS.Trt_vs_MS.NoTrt_B |
| DLEC1   | 0.01159 | -0.5681 | 0.377 | 0.48 | 1 MS.Trt_vs_MS.NoTrt_B |
| ARPC1A  | 0.0116  | -0.4759 | 0.216 | 0.3  | 1 MS.Trt_vs_MS.NoTrt_B |
| KCTD21  | 0.01161 | -0.6259 | 0.322 | 0.42 | 1 MS.Trt_vs_MS.NoTrt_B |
| NDUFAF1 | 0.01164 | 0.70247 | 0.305 | 0.42 | 1 MS.Trt_vs_MS.NoTrt_B |
| SLC25A5 | 0.01169 | 0.26449 | 0.261 | 0.37 | 1 MS.Trt_vs_MS.NoTrt_B |
| ZNF333  | 0.0117  | 0.39639 | 0.78  | 0.89 | 1 MS.Trt_vs_MS.NoTrt_B |
| LENG1   | 0.0117  | -0.2573 | 0.052 | 0.11 | 1 MS.Trt_vs_MS.NoTrt_B |
| FAM213A | 0.01171 | -0.31   | 0.643 | 0.79 | 1 MS.Trt_vs_MS.NoTrt_B |
| FUNDC2  | 0.01173 | 0.40717 | 0.386 | 0.49 | 1 MS.Trt_vs_MS.NoTrt_B |
| LRPPRC  | 0.01174 | 0.56802 | 0.41  | 0.54 | 1 MS.Trt_vs_MS.NoTrt_B |
| ATRX    | 0.01174 | 0.41238 | 0.501 | 0.64 | 1 MS.Trt_vs_MS.NoTrt_B |
| ATP5G1  | 0.01176 | 0.44493 | 0.227 | 0.33 | 1 MS.Trt_vs_MS.NoTrt_B |
| ANKRD40 | 0.01177 | 0.71823 | 0.658 | 0.78 | 1 MS.Trt_vs_MS.NoTrt_B |
| SFN     | 0.01179 | -0.343  | 0.2   | 0.28 | 1 MS.Trt_vs_MS.NoTrt_B |
| AMT     | 0.0118  | -0.2682 | 0.325 | 0.42 | 1 MS.Trt_vs_MS.NoTrt_B |
| CSTF3   | 0.01182 | 0.25838 | 0.412 | 0.55 | 1 MS.Trt_vs_MS.NoTrt_B |
| SP3     | 0.01184 | 0.37491 | 0.438 | 0.58 | 1 MS.Trt_vs_MS.NoTrt_B |
| VGLL4   | 0.01184 | 0.48212 | 0.874 | 0.95 | 1 MS.Trt_vs_MS.NoTrt_B |
| RBM41   | 0.01185 | 0.38266 | 0.331 | 0.44 | 1 MS.Trt_vs_MS.NoTrt_B |
| CDK13   | 0.01187 | -0.3024 | 0.732 | 0.83 | 1 MS.Trt_vs_MS.NoTrt_B |
| SKAP2   | 0.01189 | -1.0236 | 0.12  | 0.19 | 1 MS.Trt_vs_MS.NoTrt_B |
| TGOLN2  | 0.01189 | 0.26067 | 0.516 | 0.65 | 1 MS.Trt_vs_MS.NoTrt_B |
| FAM136A | 0.0119  | -0.3179 | 0.246 | 0.35 | 1 MS.Trt_vs_MS.NoTrt_B |

|            |         |         |       |      |   |                      |
|------------|---------|---------|-------|------|---|----------------------|
| ABCB10     | 0.01194 | -0.4394 | 0.061 | 0.12 | 1 | MS.Trt_vs_MS.NoTrt_B |
| CTC-487M2: | 0.01198 | -0.3518 | 0.852 | 0.91 | 1 | MS.Trt_vs_MS.NoTrt_B |
| ZNF486     | 0.012   | -0.2984 | 0.558 | 0.65 | 1 | MS.Trt_vs_MS.NoTrt_B |
| SPTLC1     | 0.01201 | 0.37211 | 0.595 | 0.74 | 1 | MS.Trt_vs_MS.NoTrt_B |
| SNUPN      | 0.01202 | -0.3408 | 0.712 | 0.83 | 1 | MS.Trt_vs_MS.NoTrt_B |
| PDCD7      | 0.01205 | -0.4693 | 0.34  | 0.43 | 1 | MS.Trt_vs_MS.NoTrt_B |
| VSNL1      | 0.01206 | 0.28638 | 0.641 | 0.57 | 1 | MS.Trt_vs_MS.NoTrt_B |
| BRCA2      | 0.01208 | 1.14422 | 0.268 | 0.38 | 1 | MS.Trt_vs_MS.NoTrt_B |
| AUH        | 0.01211 | -0.6369 | 0.065 | 0.12 | 1 | MS.Trt_vs_MS.NoTrt_B |
| CYB561A3   | 0.01211 | -0.4166 | 0.932 | 0.99 | 1 | MS.Trt_vs_MS.NoTrt_B |
| MTRNR2L6   | 0.01211 | 0.2748  | 0.88  | 1    | 1 | MS.Trt_vs_MS.NoTrt_B |
| GPATCH2    | 0.01213 | 0.56121 | 0.484 | 0.36 | 1 | MS.Trt_vs_MS.NoTrt_B |
| ALS2       | 0.01213 | 0.54772 | 0.312 | 0.45 | 1 | MS.Trt_vs_MS.NoTrt_B |
| ZC3H14     | 0.01217 | 0.39093 | 0.828 | 0.94 | 1 | MS.Trt_vs_MS.NoTrt_B |
| DHX29      | 0.01218 | -0.3113 | 0.109 | 0.18 | 1 | MS.Trt_vs_MS.NoTrt_B |
| CERS4      | 0.01219 | -0.6437 | 0.484 | 0.6  | 1 | MS.Trt_vs_MS.NoTrt_B |
| STX17      | 0.0122  | 0.85509 | 0.37  | 0.5  | 1 | MS.Trt_vs_MS.NoTrt_B |
| COPS7B     | 0.0122  | -0.2846 | 0.686 | 0.76 | 1 | MS.Trt_vs_MS.NoTrt_B |
| EHMT2      | 0.01224 | -0.3107 | 0.523 | 0.64 | 1 | MS.Trt_vs_MS.NoTrt_B |
| SDR42E1    | 0.01227 | 0.37824 | 0.312 | 0.43 | 1 | MS.Trt_vs_MS.NoTrt_B |
| POGK       | 0.0123  | -0.6274 | 0.176 | 0.26 | 1 | MS.Trt_vs_MS.NoTrt_B |
| MYCBP2     | 0.0123  | 0.68805 | 0.327 | 0.43 | 1 | MS.Trt_vs_MS.NoTrt_B |
| ZNF774     | 0.01232 | 0.37918 | 0.824 | 0.91 | 1 | MS.Trt_vs_MS.NoTrt_B |
| SENP8      | 0.01232 | 0.38383 | 0.386 | 0.48 | 1 | MS.Trt_vs_MS.NoTrt_B |
| MED29      | 0.01235 | 0.31608 | 0.407 | 0.51 | 1 | MS.Trt_vs_MS.NoTrt_B |
| ZNF500     | 0.01235 | 0.62945 | 0.466 | 0.64 | 1 | MS.Trt_vs_MS.NoTrt_B |
| ECHS1      | 0.01236 | -0.3457 | 0.089 | 0.16 | 1 | MS.Trt_vs_MS.NoTrt_B |
| ZNF331     | 0.01239 | 0.34838 | 0.492 | 0.61 | 1 | MS.Trt_vs_MS.NoTrt_B |
| FOCAD      | 0.01243 | 0.30179 | 0.397 | 0.55 | 1 | MS.Trt_vs_MS.NoTrt_B |
| CARD16     | 0.01244 | 0.48617 | 0.224 | 0.34 | 1 | MS.Trt_vs_MS.NoTrt_B |
| CDHR3      | 0.01244 | -0.6549 | 0.51  | 0.62 | 1 | MS.Trt_vs_MS.NoTrt_B |
| SLC35F2    | 0.01244 | 0.48028 | 0.203 | 0.28 | 1 | MS.Trt_vs_MS.NoTrt_B |
| MFSD1      | 0.01249 | -0.4591 | 0.07  | 0.13 | 1 | MS.Trt_vs_MS.NoTrt_B |
| KPNA2      | 0.01249 | -0.7727 | 0.07  | 0.13 | 1 | MS.Trt_vs_MS.NoTrt_B |
| MSL1       | 0.01252 | 0.6253  | 0.479 | 0.64 | 1 | MS.Trt_vs_MS.NoTrt_B |
| LRRFIP2    | 0.01255 | 0.35036 | 0.571 | 0.67 | 1 | MS.Trt_vs_MS.NoTrt_B |
| RPS17      | 0.01259 | 0.36233 | 0.32  | 0.42 | 1 | MS.Trt_vs_MS.NoTrt_B |
| FAM227B    | 0.01261 | -0.4494 | 0.307 | 0.4  | 1 | MS.Trt_vs_MS.NoTrt_B |
| CASP7      | 0.01266 | -0.8484 | 0.1   | 0.17 | 1 | MS.Trt_vs_MS.NoTrt_B |
| RNMT       | 0.01267 | 0.37452 | 0.233 | 0.34 | 1 | MS.Trt_vs_MS.NoTrt_B |

|          |         |         |       |      |                        |
|----------|---------|---------|-------|------|------------------------|
| HTRA2    | 0.0127  | -0.347  | 0.085 | 0.15 | 1 MS.Trt_vs_MS.NoTrt_B |
| SEPHS2   | 0.01275 | -0.5632 | 0.07  | 0.13 | 1 MS.Trt_vs_MS.NoTrt_B |
| CHURC1   | 0.01277 | 0.41022 | 0.61  | 0.7  | 1 MS.Trt_vs_MS.NoTrt_B |
| GPR83    | 0.01278 | 0.73145 | 0.362 | 0.48 | 1 MS.Trt_vs_MS.NoTrt_B |
| BEX4     | 0.01285 | -0.3102 | 0.083 | 0.15 | 1 MS.Trt_vs_MS.NoTrt_B |
| NT5DC3   | 0.01286 | 0.31662 | 0.654 | 0.77 | 1 MS.Trt_vs_MS.NoTrt_B |
| TMEM42   | 0.01286 | 0.27064 | 0.072 | 0.14 | 1 MS.Trt_vs_MS.NoTrt_B |
| MTX2     | 0.01286 | -0.5395 | 0.135 | 0.21 | 1 MS.Trt_vs_MS.NoTrt_B |
| CLCC1    | 0.01287 | 0.25423 | 0.682 | 0.83 | 1 MS.Trt_vs_MS.NoTrt_B |
| PRRG3    | 0.01292 | 0.54071 | 0.514 | 0.42 | 1 MS.Trt_vs_MS.NoTrt_B |
| SHARPIN  | 0.01293 | -0.322  | 0.094 | 0.16 | 1 MS.Trt_vs_MS.NoTrt_B |
| LMNB1    | 0.01294 | -0.7569 | 0.05  | 0.1  | 1 MS.Trt_vs_MS.NoTrt_B |
| MKLN1    | 0.01296 | 0.36765 | 0.473 | 0.6  | 1 MS.Trt_vs_MS.NoTrt_B |
| XKR9     | 0.01306 | 0.26134 | 0.42  | 0.56 | 1 MS.Trt_vs_MS.NoTrt_B |
| GPR132   | 0.01311 | -0.6551 | 0.27  | 0.37 | 1 MS.Trt_vs_MS.NoTrt_B |
| POU6F1   | 0.0132  | -0.8363 | 0.373 | 0.47 | 1 MS.Trt_vs_MS.NoTrt_B |
| DAP      | 0.01326 | -0.2804 | 0.094 | 0.16 | 1 MS.Trt_vs_MS.NoTrt_B |
| AGAP2    | 0.01326 | -0.2848 | 0.124 | 0.2  | 1 MS.Trt_vs_MS.NoTrt_B |
| RAB11A   | 0.01328 | 0.3024  | 0.562 | 0.65 | 1 MS.Trt_vs_MS.NoTrt_B |
| INTS4    | 0.01333 | -0.6977 | 0.281 | 0.37 | 1 MS.Trt_vs_MS.NoTrt_B |
| DDX11    | 0.01334 | -0.7582 | 0.301 | 0.38 | 1 MS.Trt_vs_MS.NoTrt_B |
| L3MBTL1  | 0.01335 | 0.41276 | 0.488 | 0.6  | 1 MS.Trt_vs_MS.NoTrt_B |
| NPL      | 0.01335 | 1.02956 | 0.153 | 0.24 | 1 MS.Trt_vs_MS.NoTrt_B |
| NXPE3    | 0.01335 | -0.483  | 0.821 | 0.92 | 1 MS.Trt_vs_MS.NoTrt_B |
| PREB     | 0.01336 | -0.6117 | 0.078 | 0.14 | 1 MS.Trt_vs_MS.NoTrt_B |
| RALGPS1  | 0.01337 | 0.53572 | 0.301 | 0.43 | 1 MS.Trt_vs_MS.NoTrt_B |
| PHYH     | 0.01338 | -0.4721 | 0.118 | 0.19 | 1 MS.Trt_vs_MS.NoTrt_B |
| ABHD13   | 0.0134  | -0.4147 | 0.054 | 0.11 | 1 MS.Trt_vs_MS.NoTrt_B |
| NAA30    | 0.01343 | 0.50754 | 0.342 | 0.46 | 1 MS.Trt_vs_MS.NoTrt_B |
| SLC14A1  | 0.01344 | 0.33265 | 0.397 | 0.53 | 1 MS.Trt_vs_MS.NoTrt_B |
| NECTIN4  | 0.01345 | -0.4354 | 0.129 | 0.21 | 1 MS.Trt_vs_MS.NoTrt_B |
| DNAJC19  | 0.01345 | 0.70521 | 0.185 | 0.28 | 1 MS.Trt_vs_MS.NoTrt_B |
| FSD2     | 0.01345 | 0.431   | 0.375 | 0.49 | 1 MS.Trt_vs_MS.NoTrt_B |
| C22orf46 | 0.01347 | -0.3078 | 0.246 | 0.35 | 1 MS.Trt_vs_MS.NoTrt_B |
| UBALD2   | 0.01351 | 0.7597  | 0.083 | 0.15 | 1 MS.Trt_vs_MS.NoTrt_B |
| CARNS1   | 0.01356 | -0.5272 | 0.144 | 0.22 | 1 MS.Trt_vs_MS.NoTrt_B |
| FGGY     | 0.01358 | -0.5576 | 0.32  | 0.44 | 1 MS.Trt_vs_MS.NoTrt_B |
| ZNF227   | 0.01362 | 0.77233 | 0.375 | 0.5  | 1 MS.Trt_vs_MS.NoTrt_B |
| TMEM119  | 0.01366 | -0.6252 | 0.455 | 0.57 | 1 MS.Trt_vs_MS.NoTrt_B |
| PPP2R5E  | 0.01369 | 0.79688 | 0.174 | 0.27 | 1 MS.Trt_vs_MS.NoTrt_B |

|            |         |         |       |      |                        |
|------------|---------|---------|-------|------|------------------------|
| TRIM66     | 0.0137  | -0.3072 | 0.322 | 0.42 | 1 MS.Trt_vs_MS.NoTrt_B |
| CEP89      | 0.01373 | 0.42123 | 0.789 | 0.92 | 1 MS.Trt_vs_MS.NoTrt_B |
| CENPF      | 0.01375 | -0.6641 | 0.259 | 0.38 | 1 MS.Trt_vs_MS.NoTrt_B |
| RP11-80H18 | 0.01384 | -0.5444 | 0.194 | 0.28 | 1 MS.Trt_vs_MS.NoTrt_B |
| RBL1       | 0.01389 | 0.40292 | 0.479 | 0.57 | 1 MS.Trt_vs_MS.NoTrt_B |
| ZNF382     | 0.0139  | -0.5154 | 0.839 | 0.94 | 1 MS.Trt_vs_MS.NoTrt_B |
| AKAP17A    | 0.0139  | -0.8292 | 0.05  | 0.1  | 1 MS.Trt_vs_MS.NoTrt_B |
| TAP2       | 0.01396 | -0.3416 | 0.211 | 0.3  | 1 MS.Trt_vs_MS.NoTrt_B |
| RIN3       | 0.01397 | 0.58595 | 0.248 | 0.36 | 1 MS.Trt_vs_MS.NoTrt_B |
| WDR11      | 0.01398 | -0.411  | 0.503 | 0.62 | 1 MS.Trt_vs_MS.NoTrt_B |
| HIST1H4C   | 0.01398 | 0.56439 | 0.283 | 0.42 | 1 MS.Trt_vs_MS.NoTrt_B |
| ZCCHC4     | 0.01403 | -0.569  | 0.477 | 0.61 | 1 MS.Trt_vs_MS.NoTrt_B |
| RBM12B     | 0.01404 | -0.8722 | 0.059 | 0.11 | 1 MS.Trt_vs_MS.NoTrt_B |
| MIB1       | 0.01405 | 0.50544 | 0.094 | 0.16 | 1 MS.Trt_vs_MS.NoTrt_B |
| TMEM170A   | 0.01405 | -0.5349 | 0.706 | 0.77 | 1 MS.Trt_vs_MS.NoTrt_B |
| NAIF1      | 0.01405 | 0.27212 | 0.42  | 0.54 | 1 MS.Trt_vs_MS.NoTrt_B |
| SLAMF7     | 0.01407 | 0.51066 | 0.322 | 0.44 | 1 MS.Trt_vs_MS.NoTrt_B |
| RP11-552F3 | 0.01413 | 0.33009 | 0.109 | 0.18 | 1 MS.Trt_vs_MS.NoTrt_B |
| IPO9       | 0.01415 | 0.36553 | 0.717 | 0.83 | 1 MS.Trt_vs_MS.NoTrt_B |
| ZNF154     | 0.01419 | 0.80256 | 0.532 | 0.69 | 1 MS.Trt_vs_MS.NoTrt_B |
| PSD4       | 0.01423 | 0.36597 | 0.834 | 0.91 | 1 MS.Trt_vs_MS.NoTrt_B |
| PTCD1      | 0.01426 | 0.3956  | 0.49  | 0.61 | 1 MS.Trt_vs_MS.NoTrt_B |
| ITGAL      | 0.0143  | 0.30016 | 0.654 | 0.75 | 1 MS.Trt_vs_MS.NoTrt_B |
| TRIM68     | 0.0143  | -0.37   | 0.405 | 0.54 | 1 MS.Trt_vs_MS.NoTrt_B |
| CRTAM      | 0.01431 | 0.34821 | 0.283 | 0.41 | 1 MS.Trt_vs_MS.NoTrt_B |
| GINM1      | 0.01433 | -0.6254 | 0.397 | 0.48 | 1 MS.Trt_vs_MS.NoTrt_B |
| AMD1       | 0.01434 | -0.3294 | 0.623 | 0.74 | 1 MS.Trt_vs_MS.NoTrt_B |
| DONSON     | 0.01434 | -0.5558 | 0.122 | 0.2  | 1 MS.Trt_vs_MS.NoTrt_B |
| UBAP2      | 0.01438 | 0.47264 | 0.534 | 0.69 | 1 MS.Trt_vs_MS.NoTrt_B |
| ATP13A3    | 0.01441 | 0.90348 | 0.085 | 0.15 | 1 MS.Trt_vs_MS.NoTrt_B |
| MED22      | 0.01443 | 0.30937 | 0.423 | 0.55 | 1 MS.Trt_vs_MS.NoTrt_B |
| RPL34      | 0.01443 | 0.52452 | 0.941 | 0.99 | 1 MS.Trt_vs_MS.NoTrt_B |
| PCYOX1L    | 0.01444 | -0.418  | 0.054 | 0.11 | 1 MS.Trt_vs_MS.NoTrt_B |
| ARL6IP5    | 0.01452 | 0.38469 | 0.603 | 0.74 | 1 MS.Trt_vs_MS.NoTrt_B |
| TNIP2      | 0.01454 | -0.9181 | 0.063 | 0.12 | 1 MS.Trt_vs_MS.NoTrt_B |
| AP1B1      | 0.01456 | -0.5028 | 0.144 | 0.22 | 1 MS.Trt_vs_MS.NoTrt_B |
| PCGF1      | 0.01461 | -0.3503 | 0.336 | 0.44 | 1 MS.Trt_vs_MS.NoTrt_B |
| SGK494     | 0.01463 | 0.28736 | 0.56  | 0.71 | 1 MS.Trt_vs_MS.NoTrt_B |
| ZBTB37     | 0.01471 | -0.3067 | 0.553 | 0.69 | 1 MS.Trt_vs_MS.NoTrt_B |
| STARD9     | 0.01472 | 0.41526 | 0.756 | 0.93 | 1 MS.Trt_vs_MS.NoTrt_B |

|          |         |         |       |      |                        |
|----------|---------|---------|-------|------|------------------------|
| PCGF5    | 0.01491 | -0.5014 | 0.298 | 0.38 | 1 MS.Trt_vs_MS.NoTrt_B |
| SCYL1    | 0.01495 | -0.2821 | 0.203 | 0.29 | 1 MS.Trt_vs_MS.NoTrt_B |
| CHEK1    | 0.01495 | 0.5348  | 0.597 | 0.77 | 1 MS.Trt_vs_MS.NoTrt_B |
| CLK1     | 0.01496 | 0.45396 | 0.453 | 0.59 | 1 MS.Trt_vs_MS.NoTrt_B |
| RRP15    | 0.01498 | 0.5796  | 0.44  | 0.57 | 1 MS.Trt_vs_MS.NoTrt_B |
| KIF3A    | 0.01499 | 0.66971 | 0.584 | 0.72 | 1 MS.Trt_vs_MS.NoTrt_B |
| PYGB     | 0.015   | -0.9216 | 0.081 | 0.14 | 1 MS.Trt_vs_MS.NoTrt_B |
| OTUD3    | 0.01501 | 0.97993 | 0.375 | 0.49 | 1 MS.Trt_vs_MS.NoTrt_B |
| RBM34    | 0.01504 | 0.44106 | 0.593 | 0.74 | 1 MS.Trt_vs_MS.NoTrt_B |
| RDH16    | 0.01508 | 0.26096 | 0.529 | 0.73 | 1 MS.Trt_vs_MS.NoTrt_B |
| WASH1    | 0.01509 | 0.64698 | 0.183 | 0.28 | 1 MS.Trt_vs_MS.NoTrt_B |
| NHLRC1   | 0.01511 | -0.846  | 0.146 | 0.23 | 1 MS.Trt_vs_MS.NoTrt_B |
| SURF1    | 0.01514 | -0.3852 | 0.059 | 0.11 | 1 MS.Trt_vs_MS.NoTrt_B |
| NCAPH    | 0.01515 | -0.6842 | 0.303 | 0.42 | 1 MS.Trt_vs_MS.NoTrt_B |
| PLS1     | 0.01518 | -0.6202 | 0.185 | 0.28 | 1 MS.Trt_vs_MS.NoTrt_B |
| PTPRA    | 0.01519 | -0.9485 | 0.081 | 0.14 | 1 MS.Trt_vs_MS.NoTrt_B |
| EXOSC9   | 0.01521 | -0.3638 | 0.161 | 0.24 | 1 MS.Trt_vs_MS.NoTrt_B |
| SLC22A5  | 0.01521 | 0.79431 | 0.294 | 0.41 | 1 MS.Trt_vs_MS.NoTrt_B |
| SRSF3    | 0.01522 | 0.34861 | 0.76  | 0.84 | 1 MS.Trt_vs_MS.NoTrt_B |
| B3GNTL1  | 0.01531 | -0.2665 | 0.2   | 0.29 | 1 MS.Trt_vs_MS.NoTrt_B |
| ARHGAP18 | 0.01533 | -0.875  | 0.059 | 0.11 | 1 MS.Trt_vs_MS.NoTrt_B |
| BAG5     | 0.01535 | 0.36701 | 0.257 | 0.36 | 1 MS.Trt_vs_MS.NoTrt_B |
| NOCT     | 0.0154  | 0.25592 | 0.542 | 0.69 | 1 MS.Trt_vs_MS.NoTrt_B |
| POLE     | 0.01542 | 0.73332 | 0.682 | 0.83 | 1 MS.Trt_vs_MS.NoTrt_B |
| GAL3ST4  | 0.01546 | -1.6175 | 0.351 | 0.45 | 1 MS.Trt_vs_MS.NoTrt_B |
| AGMAT    | 0.0155  | -0.3163 | 0.773 | 0.85 | 1 MS.Trt_vs_MS.NoTrt_B |
| RPAP2    | 0.01555 | 0.34931 | 0.978 | 1    | 1 MS.Trt_vs_MS.NoTrt_B |
| ESD      | 0.0156  | -0.4756 | 0.076 | 0.14 | 1 MS.Trt_vs_MS.NoTrt_B |
| SLC25A37 | 0.01569 | 0.35087 | 0.549 | 0.68 | 1 MS.Trt_vs_MS.NoTrt_B |
| PPP2R5C  | 0.0157  | 0.33024 | 0.837 | 0.92 | 1 MS.Trt_vs_MS.NoTrt_B |
| MKL1     | 0.01574 | 0.28277 | 0.292 | 0.4  | 1 MS.Trt_vs_MS.NoTrt_B |
| LDB1     | 0.01578 | -0.4536 | 0.068 | 0.12 | 1 MS.Trt_vs_MS.NoTrt_B |
| KIF1BP   | 0.01588 | 0.35732 | 0.521 | 0.63 | 1 MS.Trt_vs_MS.NoTrt_B |
| C9orf131 | 0.01588 | 0.61556 | 0.081 | 0.15 | 1 MS.Trt_vs_MS.NoTrt_B |
| NKTR     | 0.0159  | 0.51179 | 0.732 | 0.83 | 1 MS.Trt_vs_MS.NoTrt_B |
| ZNF460   | 0.01592 | -0.6615 | 0.137 | 0.21 | 1 MS.Trt_vs_MS.NoTrt_B |
| SPG21    | 0.01592 | -0.2843 | 0.76  | 0.88 | 1 MS.Trt_vs_MS.NoTrt_B |
| JOSD1    | 0.01599 | 0.41921 | 0.403 | 0.5  | 1 MS.Trt_vs_MS.NoTrt_B |
| SOCS4    | 0.01602 | 0.32741 | 0.205 | 0.3  | 1 MS.Trt_vs_MS.NoTrt_B |
| ZC3H12C  | 0.01606 | 0.53369 | 0.072 | 0.13 | 1 MS.Trt_vs_MS.NoTrt_B |



|           |         |         |       |      |                        |
|-----------|---------|---------|-------|------|------------------------|
| ITFG1     | 0.01608 | 0.64442 | 0.15  | 0.23 | 1 MS.Trt_vs_MS.NoTrt_B |
| PRMT1     | 0.01622 | -0.2521 | 0.695 | 0.82 | 1 MS.Trt_vs_MS.NoTrt_B |
| TFR2      | 0.01635 | 0.67214 | 0.577 | 0.71 | 1 MS.Trt_vs_MS.NoTrt_B |
| TYSND1    | 0.01638 | -0.3465 | 0.179 | 0.26 | 1 MS.Trt_vs_MS.NoTrt_B |
| SLC25A25  | 0.01641 | -0.3021 | 0.087 | 0.15 | 1 MS.Trt_vs_MS.NoTrt_B |
| IFRD2     | 0.01654 | -0.4729 | 0.081 | 0.14 | 1 MS.Trt_vs_MS.NoTrt_B |
| ANGEL1    | 0.01656 | -0.8708 | 0.329 | 0.42 | 1 MS.Trt_vs_MS.NoTrt_B |
| CRIP1     | 0.01657 | 0.3492  | 0.172 | 0.25 | 1 MS.Trt_vs_MS.NoTrt_B |
| DTNB      | 0.0166  | -0.4639 | 0.111 | 0.18 | 1 MS.Trt_vs_MS.NoTrt_B |
| EPRS      | 0.01661 | -0.323  | 0.148 | 0.22 | 1 MS.Trt_vs_MS.NoTrt_B |
| PFKM      | 0.01664 | -0.2811 | 0.715 | 0.87 | 1 MS.Trt_vs_MS.NoTrt_B |
| ZNF286A   | 0.01671 | 0.68688 | 0.27  | 0.38 | 1 MS.Trt_vs_MS.NoTrt_B |
| STARD4    | 0.01677 | -0.9504 | 0.085 | 0.15 | 1 MS.Trt_vs_MS.NoTrt_B |
| ZNF3      | 0.01678 | -0.2916 | 0.58  | 0.69 | 1 MS.Trt_vs_MS.NoTrt_B |
| CAPG      | 0.01679 | -1.2552 | 0.057 | 0.11 | 1 MS.Trt_vs_MS.NoTrt_B |
| PROSC     | 0.01679 | -0.3573 | 0.331 | 0.41 | 1 MS.Trt_vs_MS.NoTrt_B |
| ZNF461    | 0.0168  | -0.5648 | 0.564 | 0.64 | 1 MS.Trt_vs_MS.NoTrt_B |
| TRIM37    | 0.01683 | -0.6559 | 0.113 | 0.18 | 1 MS.Trt_vs_MS.NoTrt_B |
| BTBD7     | 0.01684 | 0.32537 | 0.595 | 0.73 | 1 MS.Trt_vs_MS.NoTrt_B |
| AKTIP     | 0.01687 | -0.3413 | 0.521 | 0.63 | 1 MS.Trt_vs_MS.NoTrt_B |
| FAM156A   | 0.01688 | -0.9293 | 0.1   | 0.16 | 1 MS.Trt_vs_MS.NoTrt_B |
| ZNF641    | 0.01689 | 0.26346 | 0.373 | 0.5  | 1 MS.Trt_vs_MS.NoTrt_B |
| VAPA      | 0.01691 | 0.36299 | 0.638 | 0.74 | 1 MS.Trt_vs_MS.NoTrt_B |
| GCHFR     | 0.01692 | 0.31169 | 0.081 | 0.15 | 1 MS.Trt_vs_MS.NoTrt_B |
| COA3      | 0.01694 | 0.38611 | 0.102 | 0.17 | 1 MS.Trt_vs_MS.NoTrt_B |
| ZNF121    | 0.01696 | 0.37054 | 0.773 | 0.9  | 1 MS.Trt_vs_MS.NoTrt_B |
| C20orf194 | 0.01697 | 0.42356 | 0.179 | 0.27 | 1 MS.Trt_vs_MS.NoTrt_B |
| HMGXB4    | 0.01697 | -0.2701 | 0.068 | 0.12 | 1 MS.Trt_vs_MS.NoTrt_B |
| POLI      | 0.017   | 0.26816 | 0.266 | 0.37 | 1 MS.Trt_vs_MS.NoTrt_B |
| AGTRAP    | 0.01705 | -0.6541 | 0.076 | 0.14 | 1 MS.Trt_vs_MS.NoTrt_B |
| PVRIG     | 0.01705 | 0.46708 | 0.253 | 0.36 | 1 MS.Trt_vs_MS.NoTrt_B |
| JMJD7     | 0.01706 | -0.4554 | 0.089 | 0.15 | 1 MS.Trt_vs_MS.NoTrt_B |
| TADA2A    | 0.01708 | -0.8996 | 0.782 | 0.88 | 1 MS.Trt_vs_MS.NoTrt_B |
| CUBN      | 0.0171  | 0.36269 | 0.301 | 0.41 | 1 MS.Trt_vs_MS.NoTrt_B |
| SLC25A29  | 0.01711 | 0.36253 | 0.268 | 0.39 | 1 MS.Trt_vs_MS.NoTrt_B |
| PLGLB1    | 0.01714 | 0.60567 | 0.089 | 0.16 | 1 MS.Trt_vs_MS.NoTrt_B |
| PSMD3     | 0.01723 | -0.4769 | 0.394 | 0.51 | 1 MS.Trt_vs_MS.NoTrt_B |
| CASP8AP2  | 0.01723 | 0.4324  | 0.305 | 0.41 | 1 MS.Trt_vs_MS.NoTrt_B |
| FGD2      | 0.01731 | 0.25414 | 0.569 | 0.71 | 1 MS.Trt_vs_MS.NoTrt_B |
| MED7      | 0.01732 | 0.33978 | 0.059 | 0.11 | 1 MS.Trt_vs_MS.NoTrt_B |

|          |         |         |       |      |                        |
|----------|---------|---------|-------|------|------------------------|
| DLD      | 0.01734 | 0.57189 | 0.1   | 0.17 | 1 MS.Trt_vs_MS.NoTrt_B |
| PM20D2   | 0.01741 | 0.35341 | 0.619 | 0.78 | 1 MS.Trt_vs_MS.NoTrt_B |
| UBE2V2   | 0.01748 | 1.04734 | 0.621 | 0.72 | 1 MS.Trt_vs_MS.NoTrt_B |
| FILIP1L  | 0.0175  | -0.4771 | 0.231 | 0.33 | 1 MS.Trt_vs_MS.NoTrt_B |
| ERCC6L   | 0.01752 | -0.6386 | 0.083 | 0.15 | 1 MS.Trt_vs_MS.NoTrt_B |
| PINK1    | 0.01758 | -0.6909 | 0.194 | 0.28 | 1 MS.Trt_vs_MS.NoTrt_B |
| RASGRF1  | 0.01758 | 0.25394 | 0.235 | 0.34 | 1 MS.Trt_vs_MS.NoTrt_B |
| TRAPPC11 | 0.01758 | -0.4577 | 0.305 | 0.39 | 1 MS.Trt_vs_MS.NoTrt_B |
| SLC5A6   | 0.0176  | -0.6708 | 0.052 | 0.1  | 1 MS.Trt_vs_MS.NoTrt_B |
| ELK4     | 0.01764 | 0.65115 | 0.399 | 0.52 | 1 MS.Trt_vs_MS.NoTrt_B |
| TRAPPC9  | 0.01765 | -0.3431 | 0.072 | 0.13 | 1 MS.Trt_vs_MS.NoTrt_B |
| PDE8A    | 0.01771 | 0.26895 | 0.325 | 0.44 | 1 MS.Trt_vs_MS.NoTrt_B |
| WASF2    | 0.01782 | 0.30966 | 0.481 | 0.64 | 1 MS.Trt_vs_MS.NoTrt_B |
| LSM12    | 0.01783 | 0.40709 | 0.577 | 0.71 | 1 MS.Trt_vs_MS.NoTrt_B |
| ISOC1    | 0.01789 | -0.4672 | 0.052 | 0.1  | 1 MS.Trt_vs_MS.NoTrt_B |
| BRIP1    | 0.01789 | 0.6007  | 0.695 | 0.89 | 1 MS.Trt_vs_MS.NoTrt_B |
| MDM2     | 0.0179  | 0.27477 | 0.952 | 1    | 1 MS.Trt_vs_MS.NoTrt_B |
| SLC23A3  | 0.01792 | -0.5949 | 0.305 | 0.42 | 1 MS.Trt_vs_MS.NoTrt_B |
| VRK2     | 0.01796 | -0.4143 | 0.172 | 0.25 | 1 MS.Trt_vs_MS.NoTrt_B |
| TUBD1    | 0.01799 | 0.42244 | 0.723 | 0.8  | 1 MS.Trt_vs_MS.NoTrt_B |
| ZNF470   | 0.01802 | 0.40558 | 0.569 | 0.74 | 1 MS.Trt_vs_MS.NoTrt_B |
| SMS      | 0.01804 | -0.4306 | 0.096 | 0.16 | 1 MS.Trt_vs_MS.NoTrt_B |
| NME4     | 0.01805 | -0.3641 | 0.068 | 0.12 | 1 MS.Trt_vs_MS.NoTrt_B |
| TAB2     | 0.01806 | 0.82383 | 0.44  | 0.57 | 1 MS.Trt_vs_MS.NoTrt_B |
| CAPZA2   | 0.01808 | 0.71783 | 0.821 | 0.85 | 1 MS.Trt_vs_MS.NoTrt_B |
| GMPS     | 0.0181  | -0.4293 | 0.756 | 0.87 | 1 MS.Trt_vs_MS.NoTrt_B |
| NEIL1    | 0.01813 | -0.2713 | 0.654 | 0.81 | 1 MS.Trt_vs_MS.NoTrt_B |
| DDX3X    | 0.01826 | 0.56048 | 0.224 | 0.32 | 1 MS.Trt_vs_MS.NoTrt_B |
| NUP210   | 0.0184  | 0.42255 | 0.379 | 0.5  | 1 MS.Trt_vs_MS.NoTrt_B |
| FCRL1    | 0.01843 | -0.7112 | 0.163 | 0.24 | 1 MS.Trt_vs_MS.NoTrt_B |
| GPR68    | 0.01849 | -0.8742 | 0.061 | 0.11 | 1 MS.Trt_vs_MS.NoTrt_B |
| TP53INP1 | 0.01849 | 0.42001 | 0.261 | 0.37 | 1 MS.Trt_vs_MS.NoTrt_B |
| FBXL3    | 0.01854 | 0.59509 | 0.096 | 0.16 | 1 MS.Trt_vs_MS.NoTrt_B |
| ABHD11   | 0.01863 | 0.37066 | 0.479 | 0.62 | 1 MS.Trt_vs_MS.NoTrt_B |
| CHML     | 0.01866 | -0.722  | 0.15  | 0.23 | 1 MS.Trt_vs_MS.NoTrt_B |
| PCBD1    | 0.0187  | 0.34527 | 0.059 | 0.11 | 1 MS.Trt_vs_MS.NoTrt_B |
| MTHFD2L  | 0.0187  | -0.3253 | 0.39  | 0.49 | 1 MS.Trt_vs_MS.NoTrt_B |
| PKP2     | 0.01875 | 0.54702 | 0.547 | 0.47 | 1 MS.Trt_vs_MS.NoTrt_B |
| CCDC171  | 0.01879 | -0.2501 | 0.34  | 0.45 | 1 MS.Trt_vs_MS.NoTrt_B |
| PTPN7    | 0.01881 | 0.25849 | 0.571 | 0.72 | 1 MS.Trt_vs_MS.NoTrt_B |

|            |         |         |       |      |                        |
|------------|---------|---------|-------|------|------------------------|
| TSC22D2    | 0.01883 | 0.37916 | 0.285 | 0.38 | 1 MS.Trt_vs_MS.NoTrt_B |
| FDPS       | 0.01884 | -0.3609 | 0.401 | 0.48 | 1 MS.Trt_vs_MS.NoTrt_B |
| ARHGAP27   | 0.01884 | 0.42138 | 0.46  | 0.59 | 1 MS.Trt_vs_MS.NoTrt_B |
| AP4M1      | 0.01892 | -0.6106 | 0.447 | 0.61 | 1 MS.Trt_vs_MS.NoTrt_B |
| CMC1       | 0.01894 | 1.32656 | 0.115 | 0.19 | 1 MS.Trt_vs_MS.NoTrt_B |
| ABCG5      | 0.01895 | -0.3961 | 0.159 | 0.24 | 1 MS.Trt_vs_MS.NoTrt_B |
| ZNF681     | 0.01897 | 0.63818 | 0.549 | 0.68 | 1 MS.Trt_vs_MS.NoTrt_B |
| PIP4K2C    | 0.01897 | -0.5581 | 0.115 | 0.18 | 1 MS.Trt_vs_MS.NoTrt_B |
| PHYKPL     | 0.01901 | 0.345   | 0.336 | 0.44 | 1 MS.Trt_vs_MS.NoTrt_B |
| NUP58      | 0.01902 | -0.4589 | 0.242 | 0.33 | 1 MS.Trt_vs_MS.NoTrt_B |
| CDK9       | 0.01903 | -0.5494 | 0.061 | 0.11 | 1 MS.Trt_vs_MS.NoTrt_B |
| PAPLN      | 0.01909 | -0.6583 | 0.621 | 0.72 | 1 MS.Trt_vs_MS.NoTrt_B |
| PPP2R3C    | 0.01909 | -0.4288 | 0.098 | 0.16 | 1 MS.Trt_vs_MS.NoTrt_B |
| USP7       | 0.0191  | 0.51801 | 0.235 | 0.34 | 1 MS.Trt_vs_MS.NoTrt_B |
| EXOSC2     | 0.01913 | 0.58115 | 0.625 | 0.78 | 1 MS.Trt_vs_MS.NoTrt_B |
| CLNK       | 0.01917 | 0.37481 | 0.488 | 0.64 | 1 MS.Trt_vs_MS.NoTrt_B |
| SEC23IP    | 0.01923 | 0.49907 | 0.316 | 0.42 | 1 MS.Trt_vs_MS.NoTrt_B |
| CCDC58     | 0.01923 | 0.30949 | 0.253 | 0.36 | 1 MS.Trt_vs_MS.NoTrt_B |
| MKKS       | 0.01925 | 0.30398 | 0.059 | 0.11 | 1 MS.Trt_vs_MS.NoTrt_B |
| PEF1       | 0.01933 | -0.5169 | 0.129 | 0.2  | 1 MS.Trt_vs_MS.NoTrt_B |
| CECR1      | 0.01933 | -0.4362 | 0.355 | 0.48 | 1 MS.Trt_vs_MS.NoTrt_B |
| VIMP       | 0.01936 | -0.3327 | 0.085 | 0.15 | 1 MS.Trt_vs_MS.NoTrt_B |
| FITM2      | 0.01938 | 0.56863 | 0.573 | 0.7  | 1 MS.Trt_vs_MS.NoTrt_B |
| RERE       | 0.01945 | -0.4201 | 0.253 | 0.35 | 1 MS.Trt_vs_MS.NoTrt_B |
| RP11-111H1 | 0.01947 | 0.78256 | 0.083 | 0.15 | 1 MS.Trt_vs_MS.NoTrt_B |
| TOP3A      | 0.01947 | -0.408  | 0.73  | 0.85 | 1 MS.Trt_vs_MS.NoTrt_B |
| DHRS1      | 0.01948 | -0.5373 | 0.51  | 0.63 | 1 MS.Trt_vs_MS.NoTrt_B |
| CEP152     | 0.01952 | 0.60077 | 0.562 | 0.67 | 1 MS.Trt_vs_MS.NoTrt_B |
| FPGT       | 0.01956 | -0.9069 | 0.074 | 0.13 | 1 MS.Trt_vs_MS.NoTrt_B |
| ATXN7L1    | 0.0196  | 0.38997 | 0.264 | 0.37 | 1 MS.Trt_vs_MS.NoTrt_B |
| HENMT1     | 0.01961 | -0.5318 | 0.264 | 0.36 | 1 MS.Trt_vs_MS.NoTrt_B |
| FAM210A    | 0.01971 | 1.05934 | 0.205 | 0.3  | 1 MS.Trt_vs_MS.NoTrt_B |
| LTBP3      | 0.01978 | 0.54156 | 0.479 | 0.6  | 1 MS.Trt_vs_MS.NoTrt_B |
| AK5        | 0.0198  | -0.3545 | 0.074 | 0.14 | 1 MS.Trt_vs_MS.NoTrt_B |
| TFDP2      | 0.01981 | 0.45167 | 0.863 | 0.91 | 1 MS.Trt_vs_MS.NoTrt_B |
| BLOC1S4    | 0.01985 | 0.55352 | 0.113 | 0.18 | 1 MS.Trt_vs_MS.NoTrt_B |
| CSNK1E     | 0.01985 | 0.39153 | 0.545 | 0.68 | 1 MS.Trt_vs_MS.NoTrt_B |
| USP15      | 0.01993 | 0.5699  | 0.743 | 0.87 | 1 MS.Trt_vs_MS.NoTrt_B |
| MCRIP2     | 0.01995 | 0.34593 | 0.394 | 0.51 | 1 MS.Trt_vs_MS.NoTrt_B |
| ZNF570     | 0.01995 | 0.49561 | 0.66  | 0.75 | 1 MS.Trt_vs_MS.NoTrt_B |

|           |         |         |       |      |                        |
|-----------|---------|---------|-------|------|------------------------|
| IFITM2    | 0.01997 | 0.38035 | 0.721 | 0.87 | 1 MS.Trt_vs_MS.NoTrt_B |
| PTPN6     | 0.02    | 0.34053 | 0.309 | 0.43 | 1 MS.Trt_vs_MS.NoTrt_B |
| NHLRC2    | 0.02003 | 0.59981 | 0.573 | 0.72 | 1 MS.Trt_vs_MS.NoTrt_B |
| SDCBP     | 0.02008 | 0.57093 | 0.124 | 0.2  | 1 MS.Trt_vs_MS.NoTrt_B |
| YDJC      | 0.02011 | 0.55127 | 0.081 | 0.14 | 1 MS.Trt_vs_MS.NoTrt_B |
| CARD6     | 0.02016 | -0.5714 | 0.405 | 0.55 | 1 MS.Trt_vs_MS.NoTrt_B |
| CACUL1    | 0.02021 | 0.56707 | 0.56  | 0.71 | 1 MS.Trt_vs_MS.NoTrt_B |
| MIS18BP1  | 0.02026 | 0.26452 | 0.475 | 0.6  | 1 MS.Trt_vs_MS.NoTrt_B |
| RNFT2     | 0.02028 | -0.2745 | 0.756 | 0.9  | 1 MS.Trt_vs_MS.NoTrt_B |
| ZNF415    | 0.02029 | 0.39939 | 0.205 | 0.3  | 1 MS.Trt_vs_MS.NoTrt_B |
| GOLT1B    | 0.02031 | 0.56956 | 0.089 | 0.15 | 1 MS.Trt_vs_MS.NoTrt_B |
| SAYSD1    | 0.02034 | 0.55592 | 0.126 | 0.2  | 1 MS.Trt_vs_MS.NoTrt_B |
| SDF2      | 0.02034 | -0.3981 | 0.131 | 0.2  | 1 MS.Trt_vs_MS.NoTrt_B |
| FBXO9     | 0.02034 | 0.38263 | 0.667 | 0.77 | 1 MS.Trt_vs_MS.NoTrt_B |
| GPN1      | 0.02038 | 0.2952  | 0.081 | 0.14 | 1 MS.Trt_vs_MS.NoTrt_B |
| PRKCD     | 0.0204  | 0.35196 | 0.377 | 0.48 | 1 MS.Trt_vs_MS.NoTrt_B |
| IRF5      | 0.02041 | 0.57579 | 0.279 | 0.38 | 1 MS.Trt_vs_MS.NoTrt_B |
| EMC8      | 0.02043 | -1.0632 | 0.096 | 0.16 | 1 MS.Trt_vs_MS.NoTrt_B |
| ANKRD54   | 0.0205  | -0.4492 | 0.564 | 0.69 | 1 MS.Trt_vs_MS.NoTrt_B |
| TOMM5     | 0.02051 | 0.30367 | 0.139 | 0.22 | 1 MS.Trt_vs_MS.NoTrt_B |
| BTD       | 0.02057 | -0.373  | 0.089 | 0.15 | 1 MS.Trt_vs_MS.NoTrt_B |
| PREP      | 0.02059 | -0.5471 | 0.061 | 0.11 | 1 MS.Trt_vs_MS.NoTrt_B |
| ACY1      | 0.02074 | 0.49449 | 0.473 | 0.61 | 1 MS.Trt_vs_MS.NoTrt_B |
| GDPD5     | 0.0208  | -0.9733 | 0.198 | 0.27 | 1 MS.Trt_vs_MS.NoTrt_B |
| PTPN4     | 0.02082 | 0.59426 | 0.473 | 0.58 | 1 MS.Trt_vs_MS.NoTrt_B |
| IQCG      | 0.02083 | -0.706  | 0.654 | 0.71 | 1 MS.Trt_vs_MS.NoTrt_B |
| SIRT3     | 0.02088 | 0.77362 | 0.229 | 0.32 | 1 MS.Trt_vs_MS.NoTrt_B |
| DFNA5     | 0.02093 | -0.4623 | 0.083 | 0.15 | 1 MS.Trt_vs_MS.NoTrt_B |
| ACAT2     | 0.02095 | 0.28594 | 0.209 | 0.29 | 1 MS.Trt_vs_MS.NoTrt_B |
| TIA1      | 0.02101 | 0.55286 | 0.198 | 0.29 | 1 MS.Trt_vs_MS.NoTrt_B |
| KDM5C     | 0.02109 | 0.3367  | 0.298 | 0.42 | 1 MS.Trt_vs_MS.NoTrt_B |
| INVS      | 0.02112 | -0.5115 | 0.098 | 0.16 | 1 MS.Trt_vs_MS.NoTrt_B |
| KCTD10    | 0.02118 | -0.4986 | 0.314 | 0.41 | 1 MS.Trt_vs_MS.NoTrt_B |
| BID       | 0.02122 | -0.4544 | 0.418 | 0.51 | 1 MS.Trt_vs_MS.NoTrt_B |
| MTERF1    | 0.02127 | -0.4023 | 0.159 | 0.24 | 1 MS.Trt_vs_MS.NoTrt_B |
| CARM1     | 0.02129 | -0.4168 | 0.076 | 0.14 | 1 MS.Trt_vs_MS.NoTrt_B |
| CRAMP1    | 0.02134 | -0.7371 | 0.061 | 0.11 | 1 MS.Trt_vs_MS.NoTrt_B |
| PSMD7     | 0.02144 | 0.35838 | 0.266 | 0.36 | 1 MS.Trt_vs_MS.NoTrt_B |
| SMC4      | 0.02144 | 0.6508  | 0.362 | 0.49 | 1 MS.Trt_vs_MS.NoTrt_B |
| ARHGAP11B | 0.02149 | -0.6598 | 0.159 | 0.23 | 1 MS.Trt_vs_MS.NoTrt_B |

|           |         |         |       |      |   |                      |
|-----------|---------|---------|-------|------|---|----------------------|
| MAP1LC3B2 | 0.02159 | 0.67146 | 0.203 | 0.31 | 1 | MS.Trt_vs_MS.NoTrt_B |
| GLO1      | 0.02162 | -0.3435 | 0.057 | 0.11 | 1 | MS.Trt_vs_MS.NoTrt_B |
| ZNF720    | 0.02172 | 0.51674 | 0.379 | 0.51 | 1 | MS.Trt_vs_MS.NoTrt_B |
| LAPTM4B   | 0.02172 | 0.46542 | 0.122 | 0.2  | 1 | MS.Trt_vs_MS.NoTrt_B |
| LGALS9    | 0.02172 | 0.32275 | 0.198 | 0.29 | 1 | MS.Trt_vs_MS.NoTrt_B |
| FAM120B   | 0.02175 | 0.44692 | 0.257 | 0.38 | 1 | MS.Trt_vs_MS.NoTrt_B |
| FAM214A   | 0.02182 | 0.98769 | 0.142 | 0.22 | 1 | MS.Trt_vs_MS.NoTrt_B |
| OAS1      | 0.02185 | -0.2782 | 0.405 | 0.49 | 1 | MS.Trt_vs_MS.NoTrt_B |
| FAM193A   | 0.02185 | 0.78839 | 0.198 | 0.29 | 1 | MS.Trt_vs_MS.NoTrt_B |
| AKIP1     | 0.02194 | -0.3044 | 0.538 | 0.7  | 1 | MS.Trt_vs_MS.NoTrt_B |
| GPATCH4   | 0.02194 | 1.1046  | 0.207 | 0.31 | 1 | MS.Trt_vs_MS.NoTrt_B |
| USE1      | 0.02196 | -0.4192 | 0.771 | 0.86 | 1 | MS.Trt_vs_MS.NoTrt_B |
| SPG11     | 0.022   | 0.26948 | 0.715 | 0.84 | 1 | MS.Trt_vs_MS.NoTrt_B |
| ASF1A     | 0.02204 | 0.86846 | 0.133 | 0.21 | 1 | MS.Trt_vs_MS.NoTrt_B |
| RASAL3    | 0.02222 | 0.31654 | 0.098 | 0.16 | 1 | MS.Trt_vs_MS.NoTrt_B |
| IDH2      | 0.02228 | -0.3595 | 0.427 | 0.51 | 1 | MS.Trt_vs_MS.NoTrt_B |
| KBTBD4    | 0.02232 | -0.4103 | 0.057 | 0.11 | 1 | MS.Trt_vs_MS.NoTrt_B |
| PARP11    | 0.02235 | 0.70195 | 0.362 | 0.49 | 1 | MS.Trt_vs_MS.NoTrt_B |
| MAPK9     | 0.02258 | 0.26095 | 0.37  | 0.48 | 1 | MS.Trt_vs_MS.NoTrt_B |
| GAN       | 0.0226  | 0.43848 | 0.736 | 0.82 | 1 | MS.Trt_vs_MS.NoTrt_B |
| RELA      | 0.02274 | 0.33173 | 0.109 | 0.18 | 1 | MS.Trt_vs_MS.NoTrt_B |
| VRTN      | 0.02285 | 0.72643 | 0.092 | 0.16 | 1 | MS.Trt_vs_MS.NoTrt_B |
| LTV1      | 0.02287 | 0.27249 | 0.1   | 0.17 | 1 | MS.Trt_vs_MS.NoTrt_B |
| ARHGAP5   | 0.02294 | 0.56315 | 0.362 | 0.49 | 1 | MS.Trt_vs_MS.NoTrt_B |
| MCEE      | 0.02296 | 1.12553 | 0.096 | 0.16 | 1 | MS.Trt_vs_MS.NoTrt_B |
| PALB2     | 0.02296 | -0.3767 | 0.148 | 0.22 | 1 | MS.Trt_vs_MS.NoTrt_B |
| SMCR8     | 0.02298 | 0.32487 | 0.198 | 0.29 | 1 | MS.Trt_vs_MS.NoTrt_B |
| JADE1     | 0.02301 | 0.4264  | 0.229 | 0.32 | 1 | MS.Trt_vs_MS.NoTrt_B |
| SMPD1     | 0.02309 | 0.27382 | 0.065 | 0.12 | 1 | MS.Trt_vs_MS.NoTrt_B |
| RABEPK    | 0.0231  | -0.6112 | 0.656 | 0.75 | 1 | MS.Trt_vs_MS.NoTrt_B |
| NDUFB3    | 0.02311 | 0.50263 | 0.122 | 0.2  | 1 | MS.Trt_vs_MS.NoTrt_B |
| ERCC6     | 0.02316 | -0.2546 | 0.181 | 0.27 | 1 | MS.Trt_vs_MS.NoTrt_B |
| TRMT10B   | 0.02317 | 0.57532 | 0.743 | 0.87 | 1 | MS.Trt_vs_MS.NoTrt_B |
| SLFN13    | 0.02318 | 0.65184 | 0.466 | 0.57 | 1 | MS.Trt_vs_MS.NoTrt_B |
| ZFP41     | 0.0232  | 0.49348 | 0.072 | 0.13 | 1 | MS.Trt_vs_MS.NoTrt_B |
| ZNF785    | 0.02323 | -0.3349 | 0.771 | 0.9  | 1 | MS.Trt_vs_MS.NoTrt_B |
| AMDHD2    | 0.02323 | -0.3383 | 0.061 | 0.11 | 1 | MS.Trt_vs_MS.NoTrt_B |
| FAM83G    | 0.02334 | 0.78308 | 0.316 | 0.43 | 1 | MS.Trt_vs_MS.NoTrt_B |
| STOM      | 0.02335 | 0.44507 | 0.525 | 0.7  | 1 | MS.Trt_vs_MS.NoTrt_B |
| RNF103    | 0.02335 | 0.43047 | 0.473 | 0.58 | 1 | MS.Trt_vs_MS.NoTrt_B |

|            |         |         |       |      |   |                      |
|------------|---------|---------|-------|------|---|----------------------|
| KAT6B      | 0.02336 | 0.43985 | 0.061 | 0.11 | 1 | MS.Trt_vs_MS.NoTrt_B |
| DHX15      | 0.0235  | 0.42828 | 0.375 | 0.49 | 1 | MS.Trt_vs_MS.NoTrt_B |
| TMEM208    | 0.02354 | -0.4437 | 0.083 | 0.14 | 1 | MS.Trt_vs_MS.NoTrt_B |
| AC012314.1 | 0.02355 | 0.27508 | 0.124 | 0.21 | 1 | MS.Trt_vs_MS.NoTrt_B |
| AC012314.1 | 0.02355 | 0.27508 | 0.124 | 0.21 | 1 | MS.Trt_vs_MS.NoTrt_B |
| AC012314.1 | 0.02355 | 0.27508 | 0.124 | 0.21 | 1 | MS.Trt_vs_MS.NoTrt_B |
| AC012314.1 | 0.02355 | 0.27508 | 0.124 | 0.21 | 1 | MS.Trt_vs_MS.NoTrt_B |
| AC012314.3 | 0.02355 | 0.27508 | 0.124 | 0.21 | 1 | MS.Trt_vs_MS.NoTrt_B |
| AC012314.6 | 0.02355 | 0.27508 | 0.124 | 0.21 | 1 | MS.Trt_vs_MS.NoTrt_B |
| AC012314.7 | 0.02355 | 0.27508 | 0.124 | 0.21 | 1 | MS.Trt_vs_MS.NoTrt_B |
| AC012314.9 | 0.02355 | 0.27508 | 0.124 | 0.21 | 1 | MS.Trt_vs_MS.NoTrt_B |
| ADAD2      | 0.02355 | 0.92943 | 0.185 | 0.28 | 1 | MS.Trt_vs_MS.NoTrt_B |
| PCBP3      | 0.02361 | -0.665  | 0.336 | 0.47 | 1 | MS.Trt_vs_MS.NoTrt_B |
| ARMC2      | 0.02367 | -0.2535 | 0.052 | 0.1  | 1 | MS.Trt_vs_MS.NoTrt_B |
| NDUFS3     | 0.0237  | 0.41901 | 0.434 | 0.55 | 1 | MS.Trt_vs_MS.NoTrt_B |
| DNAJB4     | 0.02371 | -1.2685 | 0.27  | 0.36 | 1 | MS.Trt_vs_MS.NoTrt_B |
| C15orf57   | 0.02374 | -0.3293 | 0.66  | 0.74 | 1 | MS.Trt_vs_MS.NoTrt_B |
| RAPGEF1    | 0.02388 | 0.2512  | 0.148 | 0.22 | 1 | MS.Trt_vs_MS.NoTrt_B |
| RP11-231C1 | 0.02389 | 0.58731 | 0.523 | 0.69 | 1 | MS.Trt_vs_MS.NoTrt_B |
| TBRG4      | 0.0239  | -0.5345 | 0.285 | 0.38 | 1 | MS.Trt_vs_MS.NoTrt_B |
| HEMGN      | 0.02393 | 0.66081 | 0.078 | 0.14 | 1 | MS.Trt_vs_MS.NoTrt_B |
| ZNF599     | 0.02405 | 0.28474 | 0.46  | 0.6  | 1 | MS.Trt_vs_MS.NoTrt_B |
| TTC32      | 0.02411 | 0.37173 | 0.068 | 0.12 | 1 | MS.Trt_vs_MS.NoTrt_B |
| PPARGC1B   | 0.02419 | -0.3846 | 0.558 | 0.67 | 1 | MS.Trt_vs_MS.NoTrt_B |
| ARHGAP33   | 0.02426 | -0.6333 | 0.059 | 0.11 | 1 | MS.Trt_vs_MS.NoTrt_B |
| NEDD9      | 0.02427 | -0.3876 | 0.331 | 0.42 | 1 | MS.Trt_vs_MS.NoTrt_B |
| SDHAF3     | 0.02427 | 0.41635 | 0.052 | 0.1  | 1 | MS.Trt_vs_MS.NoTrt_B |
| CYLD       | 0.02429 | 0.37619 | 0.584 | 0.72 | 1 | MS.Trt_vs_MS.NoTrt_B |
| ARFGEF2    | 0.02434 | 0.4317  | 0.377 | 0.48 | 1 | MS.Trt_vs_MS.NoTrt_B |
| ATXN7      | 0.02444 | -0.4214 | 0.416 | 0.54 | 1 | MS.Trt_vs_MS.NoTrt_B |
| PHF1       | 0.02455 | -0.288  | 0.111 | 0.18 | 1 | MS.Trt_vs_MS.NoTrt_B |
| TMEM2      | 0.02456 | 0.68556 | 0.466 | 0.57 | 1 | MS.Trt_vs_MS.NoTrt_B |
| DENND6B    | 0.02459 | -0.6302 | 0.218 | 0.3  | 1 | MS.Trt_vs_MS.NoTrt_B |
| TRIM33     | 0.02461 | 0.4165  | 0.266 | 0.34 | 1 | MS.Trt_vs_MS.NoTrt_B |
| RPS14      | 0.02467 | 0.5136  | 0.954 | 1    | 1 | MS.Trt_vs_MS.NoTrt_B |
| SLC22A18   | 0.02469 | 0.5768  | 0.453 | 0.6  | 1 | MS.Trt_vs_MS.NoTrt_B |
| ARID3B     | 0.02469 | -0.2689 | 0.599 | 0.69 | 1 | MS.Trt_vs_MS.NoTrt_B |
| NAA15      | 0.02469 | 0.29122 | 0.63  | 0.74 | 1 | MS.Trt_vs_MS.NoTrt_B |
| PPP4R3B    | 0.02472 | 0.53183 | 0.338 | 0.45 | 1 | MS.Trt_vs_MS.NoTrt_B |
| ACSM3      | 0.02477 | 0.36597 | 0.455 | 0.6  | 1 | MS.Trt_vs_MS.NoTrt_B |

|            |         |         |       |      |                        |
|------------|---------|---------|-------|------|------------------------|
| RBM12      | 0.02481 | -0.3102 | 0.161 | 0.23 | 1 MS.Trt_vs_MS.NoTrt_B |
| DHX33      | 0.02484 | -0.9232 | 0.272 | 0.36 | 1 MS.Trt_vs_MS.NoTrt_B |
| CIB1       | 0.0249  | 0.34349 | 0.168 | 0.26 | 1 MS.Trt_vs_MS.NoTrt_B |
| CNPY4      | 0.02492 | 0.42883 | 0.606 | 0.75 | 1 MS.Trt_vs_MS.NoTrt_B |
| BLVRA      | 0.02503 | -0.2997 | 0.113 | 0.18 | 1 MS.Trt_vs_MS.NoTrt_B |
| AC138517.6 | 0.02508 | 1.02638 | 0.065 | 0.12 | 1 MS.Trt_vs_MS.NoTrt_B |
| SIK3       | 0.02515 | -0.5325 | 0.19  | 0.27 | 1 MS.Trt_vs_MS.NoTrt_B |
| XRN1       | 0.02519 | 0.51058 | 0.821 | 0.92 | 1 MS.Trt_vs_MS.NoTrt_B |
| MTA3       | 0.0252  | 0.4973  | 0.516 | 0.65 | 1 MS.Trt_vs_MS.NoTrt_B |
| ST3GAL1    | 0.02528 | -0.3273 | 0.179 | 0.25 | 1 MS.Trt_vs_MS.NoTrt_B |
| RWDD3      | 0.02528 | 0.30872 | 0.085 | 0.15 | 1 MS.Trt_vs_MS.NoTrt_B |
| ZNF670     | 0.02531 | 0.58277 | 0.102 | 0.17 | 1 MS.Trt_vs_MS.NoTrt_B |
| ATP11B     | 0.02532 | 0.88101 | 0.185 | 0.27 | 1 MS.Trt_vs_MS.NoTrt_B |
| PPP2R3A    | 0.02537 | 0.27519 | 0.59  | 0.76 | 1 MS.Trt_vs_MS.NoTrt_B |
| GLMP       | 0.02538 | 0.2946  | 0.617 | 0.76 | 1 MS.Trt_vs_MS.NoTrt_B |
| SOS2       | 0.02541 | 0.42121 | 0.07  | 0.12 | 1 MS.Trt_vs_MS.NoTrt_B |
| EXOSC8     | 0.02543 | 0.59956 | 0.425 | 0.54 | 1 MS.Trt_vs_MS.NoTrt_B |
| ZRANB3     | 0.02544 | -0.2536 | 0.545 | 0.71 | 1 MS.Trt_vs_MS.NoTrt_B |
| PTAR1      | 0.02551 | 0.44842 | 0.124 | 0.2  | 1 MS.Trt_vs_MS.NoTrt_B |
| ATP8A1     | 0.02551 | -0.3139 | 0.109 | 0.17 | 1 MS.Trt_vs_MS.NoTrt_B |
| TDG        | 0.02562 | 0.29695 | 0.229 | 0.32 | 1 MS.Trt_vs_MS.NoTrt_B |
| ASAH2B     | 0.02563 | 0.28869 | 0.331 | 0.41 | 1 MS.Trt_vs_MS.NoTrt_B |
| MUC20      | 0.02568 | 0.36217 | 0.407 | 0.56 | 1 MS.Trt_vs_MS.NoTrt_B |
| GCNT1      | 0.0257  | 0.86657 | 0.179 | 0.27 | 1 MS.Trt_vs_MS.NoTrt_B |
| MAP2K3     | 0.02572 | -0.7335 | 0.089 | 0.15 | 1 MS.Trt_vs_MS.NoTrt_B |
| NEO1       | 0.02573 | 0.97513 | 0.216 | 0.33 | 1 MS.Trt_vs_MS.NoTrt_B |
| DMGDH      | 0.02582 | 0.26426 | 0.322 | 0.45 | 1 MS.Trt_vs_MS.NoTrt_B |
| MMS22L     | 0.02592 | 0.26037 | 0.817 | 0.92 | 1 MS.Trt_vs_MS.NoTrt_B |
| MAMLD1     | 0.02592 | 0.71752 | 0.163 | 0.24 | 1 MS.Trt_vs_MS.NoTrt_B |
| TTC26      | 0.02596 | -0.2717 | 0.292 | 0.39 | 1 MS.Trt_vs_MS.NoTrt_B |
| ZDHHC6     | 0.02603 | 0.29734 | 0.122 | 0.19 | 1 MS.Trt_vs_MS.NoTrt_B |
| TG         | 0.02606 | 0.6035  | 0.052 | 0.1  | 1 MS.Trt_vs_MS.NoTrt_B |
| FBXO6      | 0.02608 | 0.30569 | 0.545 | 0.71 | 1 MS.Trt_vs_MS.NoTrt_B |
| MED30      | 0.02624 | 0.30182 | 0.087 | 0.15 | 1 MS.Trt_vs_MS.NoTrt_B |
| POU2AF1    | 0.02633 | 0.45765 | 0.542 | 0.7  | 1 MS.Trt_vs_MS.NoTrt_B |
| GYG1       | 0.02635 | -0.8105 | 0.434 | 0.52 | 1 MS.Trt_vs_MS.NoTrt_B |
| EMC10      | 0.0264  | 0.30836 | 0.708 | 0.83 | 1 MS.Trt_vs_MS.NoTrt_B |
| ATP6V0E1   | 0.02642 | 0.33109 | 0.244 | 0.35 | 1 MS.Trt_vs_MS.NoTrt_B |
| ZFC3H1     | 0.02656 | 0.47977 | 0.29  | 0.4  | 1 MS.Trt_vs_MS.NoTrt_B |
| QKI        | 0.0266  | -0.9587 | 0.292 | 0.39 | 1 MS.Trt_vs_MS.NoTrt_B |

|            |         |         |       |      |                        |
|------------|---------|---------|-------|------|------------------------|
| ZNF595     | 0.02662 | 0.95944 | 0.671 | 0.81 | 1 MS.Trt_vs_MS.NoTrt_B |
| MTIF2      | 0.02662 | -1.7896 | 0.322 | 0.4  | 1 MS.Trt_vs_MS.NoTrt_B |
| TUBA1C     | 0.02667 | -0.479  | 0.479 | 0.61 | 1 MS.Trt_vs_MS.NoTrt_B |
| TRIP4      | 0.02668 | -0.4144 | 0.455 | 0.55 | 1 MS.Trt_vs_MS.NoTrt_B |
| RP11-514P8 | 0.02687 | -0.3264 | 0.054 | 0.1  | 1 MS.Trt_vs_MS.NoTrt_B |
| ANAPC2     | 0.02687 | -0.873  | 0.054 | 0.1  | 1 MS.Trt_vs_MS.NoTrt_B |
| TTBK2      | 0.02693 | 1.10818 | 0.397 | 0.5  | 1 MS.Trt_vs_MS.NoTrt_B |
| MLH3       | 0.02698 | -0.2853 | 0.068 | 0.12 | 1 MS.Trt_vs_MS.NoTrt_B |
| ZNF778     | 0.02698 | 1.14934 | 0.495 | 0.61 | 1 MS.Trt_vs_MS.NoTrt_B |
| AC016577.1 | 0.02709 | 0.28885 | 0.298 | 0.42 | 1 MS.Trt_vs_MS.NoTrt_B |
| NUDCD2     | 0.02711 | 0.29773 | 0.645 | 0.72 | 1 MS.Trt_vs_MS.NoTrt_B |
| XPNPEP3    | 0.02712 | 0.27301 | 0.81  | 0.94 | 1 MS.Trt_vs_MS.NoTrt_B |
| PAIP2      | 0.02712 | 0.55769 | 0.542 | 0.63 | 1 MS.Trt_vs_MS.NoTrt_B |
| FAR2       | 0.02714 | 0.39527 | 0.137 | 0.21 | 1 MS.Trt_vs_MS.NoTrt_B |
| MYO5A      | 0.02717 | -0.3526 | 0.647 | 0.73 | 1 MS.Trt_vs_MS.NoTrt_B |
| C11orf63   | 0.0272  | 0.48935 | 0.364 | 0.47 | 1 MS.Trt_vs_MS.NoTrt_B |
| SAV1       | 0.02723 | -0.3513 | 0.235 | 0.32 | 1 MS.Trt_vs_MS.NoTrt_B |
| TAF5L      | 0.02723 | -0.7637 | 0.083 | 0.14 | 1 MS.Trt_vs_MS.NoTrt_B |
| LRRC8B     | 0.02725 | 0.83889 | 0.349 | 0.47 | 1 MS.Trt_vs_MS.NoTrt_B |
| RIPK2      | 0.02732 | -0.7804 | 0.118 | 0.18 | 1 MS.Trt_vs_MS.NoTrt_B |
| PLD1       | 0.02735 | -0.5842 | 0.39  | 0.52 | 1 MS.Trt_vs_MS.NoTrt_B |
| BIRC5      | 0.02749 | -0.3547 | 0.593 | 0.71 | 1 MS.Trt_vs_MS.NoTrt_B |
| NCOA5      | 0.0275  | -0.4228 | 0.078 | 0.14 | 1 MS.Trt_vs_MS.NoTrt_B |
| THAP9      | 0.02755 | 0.36961 | 0.453 | 0.6  | 1 MS.Trt_vs_MS.NoTrt_B |
| TXNRD1     | 0.02757 | 0.31412 | 0.246 | 0.33 | 1 MS.Trt_vs_MS.NoTrt_B |
| KIF6       | 0.02757 | 0.41572 | 0.736 | 0.9  | 1 MS.Trt_vs_MS.NoTrt_B |
| GMCL1      | 0.02757 | 0.73303 | 0.283 | 0.38 | 1 MS.Trt_vs_MS.NoTrt_B |
| SNRNP40    | 0.02764 | 0.29293 | 0.135 | 0.21 | 1 MS.Trt_vs_MS.NoTrt_B |
| GTF2F1     | 0.02769 | 0.28105 | 0.246 | 0.34 | 1 MS.Trt_vs_MS.NoTrt_B |
| PRRC1      | 0.0277  | 0.38325 | 0.292 | 0.38 | 1 MS.Trt_vs_MS.NoTrt_B |
| ZNF280B    | 0.0278  | 1.10441 | 0.076 | 0.13 | 1 MS.Trt_vs_MS.NoTrt_B |
| ZNF169     | 0.0278  | -0.4022 | 0.699 | 0.81 | 1 MS.Trt_vs_MS.NoTrt_B |
| RPAP1      | 0.02782 | -0.4316 | 0.693 | 0.83 | 1 MS.Trt_vs_MS.NoTrt_B |
| HTT        | 0.02794 | 0.34522 | 0.163 | 0.24 | 1 MS.Trt_vs_MS.NoTrt_B |
| GMPPB      | 0.02813 | -0.6314 | 0.32  | 0.41 | 1 MS.Trt_vs_MS.NoTrt_B |
| SYNE2      | 0.02816 | 0.31879 | 0.854 | 0.96 | 1 MS.Trt_vs_MS.NoTrt_B |
| IP6K1      | 0.02819 | 0.51127 | 0.078 | 0.14 | 1 MS.Trt_vs_MS.NoTrt_B |
| PLEKHA1    | 0.02829 | 0.41383 | 0.854 | 0.94 | 1 MS.Trt_vs_MS.NoTrt_B |
| STK39      | 0.02851 | 0.82574 | 0.07  | 0.12 | 1 MS.Trt_vs_MS.NoTrt_B |
| KIAA1958   | 0.02854 | -0.5083 | 0.573 | 0.69 | 1 MS.Trt_vs_MS.NoTrt_B |



|         |         |         |       |      |                        |
|---------|---------|---------|-------|------|------------------------|
| GNG10   | 0.02862 | 0.77165 | 0.113 | 0.18 | 1 MS.Trt_vs_MS.NoTrt_B |
| CLSTN1  | 0.02865 | 0.25755 | 0.161 | 0.24 | 1 MS.Trt_vs_MS.NoTrt_B |
| CCDC69  | 0.02866 | 0.33665 | 0.695 | 0.83 | 1 MS.Trt_vs_MS.NoTrt_B |
| NT5C3B  | 0.02874 | 0.36866 | 0.51  | 0.64 | 1 MS.Trt_vs_MS.NoTrt_B |
| THRAP3  | 0.02874 | 0.3337  | 0.322 | 0.42 | 1 MS.Trt_vs_MS.NoTrt_B |
| PIGM    | 0.02875 | -0.5169 | 0.458 | 0.54 | 1 MS.Trt_vs_MS.NoTrt_B |
| HSD17B7 | 0.02879 | 0.48926 | 0.412 | 0.51 | 1 MS.Trt_vs_MS.NoTrt_B |
| CWC27   | 0.02892 | -0.2575 | 0.087 | 0.15 | 1 MS.Trt_vs_MS.NoTrt_B |
| ZNF764  | 0.02901 | -0.4148 | 0.235 | 0.32 | 1 MS.Trt_vs_MS.NoTrt_B |
| GRIA1   | 0.02908 | 0.42811 | 0.076 | 0.14 | 1 MS.Trt_vs_MS.NoTrt_B |
| ABCF1   | 0.02908 | 0.35432 | 0.712 | 0.82 | 1 MS.Trt_vs_MS.NoTrt_B |
| ERCC4   | 0.02913 | 0.67062 | 0.793 | 0.89 | 1 MS.Trt_vs_MS.NoTrt_B |
| TRUB2   | 0.02915 | -0.4299 | 0.878 | 0.98 | 1 MS.Trt_vs_MS.NoTrt_B |
| PRKAB1  | 0.02922 | 0.49418 | 0.651 | 0.76 | 1 MS.Trt_vs_MS.NoTrt_B |
| RGPD8   | 0.02922 | 0.91595 | 0.124 | 0.2  | 1 MS.Trt_vs_MS.NoTrt_B |
| ATP13A4 | 0.02926 | 0.61405 | 0.32  | 0.42 | 1 MS.Trt_vs_MS.NoTrt_B |
| ASXL1   | 0.02929 | 0.39388 | 0.146 | 0.22 | 1 MS.Trt_vs_MS.NoTrt_B |
| ORAOV1  | 0.02936 | -0.5642 | 0.529 | 0.64 | 1 MS.Trt_vs_MS.NoTrt_B |
| AMACR   | 0.02943 | -1.5475 | 0.054 | 0.1  | 1 MS.Trt_vs_MS.NoTrt_B |
| SRPRB   | 0.02945 | -0.4255 | 0.115 | 0.18 | 1 MS.Trt_vs_MS.NoTrt_B |
| BMP1    | 0.0296  | 0.70866 | 0.381 | 0.51 | 1 MS.Trt_vs_MS.NoTrt_B |
| FAM91A1 | 0.02965 | -0.8691 | 0.233 | 0.32 | 1 MS.Trt_vs_MS.NoTrt_B |
| EFL1    | 0.02967 | -0.4703 | 0.068 | 0.12 | 1 MS.Trt_vs_MS.NoTrt_B |
| RFX3    | 0.02974 | 0.77697 | 0.098 | 0.16 | 1 MS.Trt_vs_MS.NoTrt_B |
| POGZ    | 0.02979 | 0.44667 | 0.684 | 0.8  | 1 MS.Trt_vs_MS.NoTrt_B |
| FUT11   | 0.02981 | -0.5885 | 0.603 | 0.72 | 1 MS.Trt_vs_MS.NoTrt_B |
| VBP1    | 0.02983 | 0.49398 | 0.092 | 0.15 | 1 MS.Trt_vs_MS.NoTrt_B |
| ITIH5   | 0.0299  | 0.48156 | 0.688 | 0.83 | 1 MS.Trt_vs_MS.NoTrt_B |
| BTG3    | 0.02996 | -0.4787 | 0.196 | 0.27 | 1 MS.Trt_vs_MS.NoTrt_B |
| CCDC9   | 0.02999 | -0.2931 | 0.172 | 0.24 | 1 MS.Trt_vs_MS.NoTrt_B |
| PGS1    | 0.03004 | -0.534  | 0.512 | 0.58 | 1 MS.Trt_vs_MS.NoTrt_B |
| INTS6   | 0.03006 | 0.36414 | 0.824 | 0.94 | 1 MS.Trt_vs_MS.NoTrt_B |
| PAQR8   | 0.03007 | -0.3252 | 0.375 | 0.47 | 1 MS.Trt_vs_MS.NoTrt_B |
| SERINC1 | 0.03012 | 0.34718 | 0.505 | 0.63 | 1 MS.Trt_vs_MS.NoTrt_B |
| NLRP2   | 0.03029 | 0.58912 | 0.706 | 0.81 | 1 MS.Trt_vs_MS.NoTrt_B |
| WDR33   | 0.03037 | 0.54675 | 0.172 | 0.25 | 1 MS.Trt_vs_MS.NoTrt_B |
| SPRYD3  | 0.0304  | -0.3711 | 0.098 | 0.16 | 1 MS.Trt_vs_MS.NoTrt_B |
| AKAP8   | 0.03041 | -0.3478 | 0.275 | 0.37 | 1 MS.Trt_vs_MS.NoTrt_B |
| MRPS21  | 0.03056 | 0.5186  | 0.42  | 0.52 | 1 MS.Trt_vs_MS.NoTrt_B |
| PARN    | 0.03057 | -0.5267 | 0.606 | 0.69 | 1 MS.Trt_vs_MS.NoTrt_B |

|            |         |         |       |      |                        |
|------------|---------|---------|-------|------|------------------------|
| APBA2      | 0.03061 | 0.5622  | 0.412 | 0.54 | 1 MS.Trt_vs_MS.NoTrt_B |
| NUMA1      | 0.03061 | 0.27256 | 0.78  | 0.91 | 1 MS.Trt_vs_MS.NoTrt_B |
| TIRAP      | 0.03064 | -1.1561 | 0.355 | 0.45 | 1 MS.Trt_vs_MS.NoTrt_B |
| SLC24A1    | 0.03068 | 1.17004 | 0.344 | 0.45 | 1 MS.Trt_vs_MS.NoTrt_B |
| RAC1       | 0.0307  | 0.51074 | 0.102 | 0.17 | 1 MS.Trt_vs_MS.NoTrt_B |
| ZNF772     | 0.03077 | 0.4489  | 0.373 | 0.45 | 1 MS.Trt_vs_MS.NoTrt_B |
| COQ3       | 0.03078 | -0.2663 | 0.185 | 0.26 | 1 MS.Trt_vs_MS.NoTrt_B |
| MTUS1      | 0.0308  | 0.52269 | 0.27  | 0.37 | 1 MS.Trt_vs_MS.NoTrt_B |
| TTC23      | 0.03085 | 0.27156 | 0.442 | 0.56 | 1 MS.Trt_vs_MS.NoTrt_B |
| SOAT1      | 0.03087 | -0.505  | 0.61  | 0.64 | 1 MS.Trt_vs_MS.NoTrt_B |
| BCAT1      | 0.0309  | -0.6216 | 0.344 | 0.45 | 1 MS.Trt_vs_MS.NoTrt_B |
| HERC6      | 0.0309  | -0.9833 | 0.237 | 0.3  | 1 MS.Trt_vs_MS.NoTrt_B |
| RIT1       | 0.03098 | 0.86031 | 0.327 | 0.42 | 1 MS.Trt_vs_MS.NoTrt_B |
| TP53I13    | 0.03098 | 0.38418 | 0.083 | 0.14 | 1 MS.Trt_vs_MS.NoTrt_B |
| TYW5       | 0.03103 | 1.07531 | 0.78  | 0.91 | 1 MS.Trt_vs_MS.NoTrt_B |
| CAPN10     | 0.03105 | 0.79747 | 0.37  | 0.48 | 1 MS.Trt_vs_MS.NoTrt_B |
| NR1H3      | 0.03116 | 0.65325 | 0.092 | 0.15 | 1 MS.Trt_vs_MS.NoTrt_B |
| CPT1B      | 0.03117 | -0.9328 | 0.118 | 0.18 | 1 MS.Trt_vs_MS.NoTrt_B |
| SLMAP      | 0.03117 | 0.54497 | 0.641 | 0.77 | 1 MS.Trt_vs_MS.NoTrt_B |
| CHD9       | 0.03122 | 0.64348 | 0.305 | 0.4  | 1 MS.Trt_vs_MS.NoTrt_B |
| HTN1       | 0.03124 | 0.32742 | 0.586 | 0.75 | 1 MS.Trt_vs_MS.NoTrt_B |
| STK17A     | 0.03131 | 0.71682 | 0.196 | 0.29 | 1 MS.Trt_vs_MS.NoTrt_B |
| ANAPC1     | 0.03131 | 0.77484 | 0.434 | 0.56 | 1 MS.Trt_vs_MS.NoTrt_B |
| SBK1       | 0.03134 | 0.3276  | 0.118 | 0.18 | 1 MS.Trt_vs_MS.NoTrt_B |
| ACSF2      | 0.0314  | -1.0887 | 0.336 | 0.44 | 1 MS.Trt_vs_MS.NoTrt_B |
| BBS9       | 0.03146 | -0.6021 | 0.072 | 0.12 | 1 MS.Trt_vs_MS.NoTrt_B |
| DNASE2     | 0.03148 | -0.2635 | 0.349 | 0.46 | 1 MS.Trt_vs_MS.NoTrt_B |
| ATG5       | 0.03156 | 0.30477 | 0.126 | 0.2  | 1 MS.Trt_vs_MS.NoTrt_B |
| UBAP1L     | 0.03156 | 0.50938 | 0.288 | 0.38 | 1 MS.Trt_vs_MS.NoTrt_B |
| CEP126     | 0.03174 | 0.61268 | 0.577 | 0.73 | 1 MS.Trt_vs_MS.NoTrt_B |
| RP11-226E2 | 0.0318  | 0.6305  | 0.516 | 0.63 | 1 MS.Trt_vs_MS.NoTrt_B |
| HAUS5      | 0.03188 | 0.56385 | 0.318 | 0.43 | 1 MS.Trt_vs_MS.NoTrt_B |
| SPC24      | 0.03188 | -0.3878 | 0.793 | 0.82 | 1 MS.Trt_vs_MS.NoTrt_B |
| ZNF566     | 0.03191 | -0.4193 | 0.752 | 0.88 | 1 MS.Trt_vs_MS.NoTrt_B |
| PHLDA1     | 0.03201 | -0.9513 | 0.357 | 0.44 | 1 MS.Trt_vs_MS.NoTrt_B |
| GLB1L2     | 0.03205 | 0.66197 | 0.272 | 0.36 | 1 MS.Trt_vs_MS.NoTrt_B |
| COL4A3BP   | 0.03218 | 0.50331 | 0.087 | 0.15 | 1 MS.Trt_vs_MS.NoTrt_B |
| ABO        | 0.03218 | -0.8791 | 0.266 | 0.36 | 1 MS.Trt_vs_MS.NoTrt_B |
| MVD        | 0.03219 | 0.32662 | 0.386 | 0.5  | 1 MS.Trt_vs_MS.NoTrt_B |
| JAKMIP2    | 0.03228 | -1.2083 | 0.305 | 0.38 | 1 MS.Trt_vs_MS.NoTrt_B |

|          |         |         |       |      |                        |
|----------|---------|---------|-------|------|------------------------|
| CHIT1    | 0.03229 | -1.2327 | 0.063 | 0.11 | 1 MS.Trt_vs_MS.NoTrt_B |
| ZC3H12B  | 0.03233 | 0.7214  | 0.429 | 0.52 | 1 MS.Trt_vs_MS.NoTrt_B |
| BRD3     | 0.0324  | 0.3045  | 0.118 | 0.18 | 1 MS.Trt_vs_MS.NoTrt_B |
| CCDC91   | 0.03245 | 0.30105 | 0.34  | 0.43 | 1 MS.Trt_vs_MS.NoTrt_B |
| ZNF70    | 0.03245 | -0.3418 | 0.71  | 0.84 | 1 MS.Trt_vs_MS.NoTrt_B |
| SCOC     | 0.03255 | 0.35599 | 0.063 | 0.11 | 1 MS.Trt_vs_MS.NoTrt_B |
| TPRG1    | 0.03267 | -0.6814 | 0.124 | 0.19 | 1 MS.Trt_vs_MS.NoTrt_B |
| RAB2A    | 0.03271 | 0.27273 | 0.155 | 0.23 | 1 MS.Trt_vs_MS.NoTrt_B |
| ADAT2    | 0.03272 | 0.60688 | 0.279 | 0.38 | 1 MS.Trt_vs_MS.NoTrt_B |
| TMCO6    | 0.03296 | -0.5836 | 0.412 | 0.51 | 1 MS.Trt_vs_MS.NoTrt_B |
| GNAS     | 0.03301 | 0.44795 | 0.377 | 0.5  | 1 MS.Trt_vs_MS.NoTrt_B |
| COA5     | 0.03305 | 0.46759 | 0.388 | 0.49 | 1 MS.Trt_vs_MS.NoTrt_B |
| DYNC1H1  | 0.03307 | 0.3885  | 0.841 | 0.96 | 1 MS.Trt_vs_MS.NoTrt_B |
| MRPS25   | 0.0331  | 0.44517 | 0.346 | 0.44 | 1 MS.Trt_vs_MS.NoTrt_B |
| CHST14   | 0.03315 | -0.6503 | 0.157 | 0.23 | 1 MS.Trt_vs_MS.NoTrt_B |
| ITGAX    | 0.03324 | 0.55165 | 0.412 | 0.54 | 1 MS.Trt_vs_MS.NoTrt_B |
| ENO3     | 0.03324 | 0.52912 | 0.364 | 0.47 | 1 MS.Trt_vs_MS.NoTrt_B |
| ZNF816   | 0.03327 | 0.36969 | 0.403 | 0.5  | 1 MS.Trt_vs_MS.NoTrt_B |
| SNX30    | 0.0334  | 1.05903 | 0.344 | 0.45 | 1 MS.Trt_vs_MS.NoTrt_B |
| TIMM17B  | 0.03357 | 0.38422 | 0.584 | 0.67 | 1 MS.Trt_vs_MS.NoTrt_B |
| PGF      | 0.03358 | 0.29335 | 0.185 | 0.25 | 1 MS.Trt_vs_MS.NoTrt_B |
| SGK1     | 0.03363 | -0.8105 | 0.27  | 0.37 | 1 MS.Trt_vs_MS.NoTrt_B |
| IL13RA1  | 0.03378 | 0.37357 | 0.196 | 0.28 | 1 MS.Trt_vs_MS.NoTrt_B |
| C14orf93 | 0.03384 | -0.3785 | 0.229 | 0.3  | 1 MS.Trt_vs_MS.NoTrt_B |
| CHSY1    | 0.03384 | -0.8155 | 0.181 | 0.25 | 1 MS.Trt_vs_MS.NoTrt_B |
| FAAP20   | 0.03388 | 0.64494 | 0.78  | 0.86 | 1 MS.Trt_vs_MS.NoTrt_B |
| C1GALT1  | 0.03388 | 0.29281 | 0.473 | 0.58 | 1 MS.Trt_vs_MS.NoTrt_B |
| RFC4     | 0.03417 | -0.2565 | 0.192 | 0.27 | 1 MS.Trt_vs_MS.NoTrt_B |
| ZFP36L2  | 0.03425 | 0.68762 | 0.327 | 0.45 | 1 MS.Trt_vs_MS.NoTrt_B |
| TUBGCP6  | 0.03435 | 0.36218 | 0.545 | 0.63 | 1 MS.Trt_vs_MS.NoTrt_B |
| ZHX3     | 0.03438 | 0.49915 | 0.29  | 0.4  | 1 MS.Trt_vs_MS.NoTrt_B |
| ZFAND4   | 0.03442 | -0.694  | 0.303 | 0.41 | 1 MS.Trt_vs_MS.NoTrt_B |
| FAM101B  | 0.03447 | 0.58485 | 0.17  | 0.25 | 1 MS.Trt_vs_MS.NoTrt_B |
| MYO15A   | 0.0347  | 0.32022 | 0.684 | 0.82 | 1 MS.Trt_vs_MS.NoTrt_B |
| YEATS2   | 0.03514 | 0.71668 | 0.553 | 0.66 | 1 MS.Trt_vs_MS.NoTrt_B |
| COPB2    | 0.0352  | -0.5005 | 0.824 | 0.91 | 1 MS.Trt_vs_MS.NoTrt_B |
| HDDC3    | 0.03526 | -0.5061 | 0.292 | 0.37 | 1 MS.Trt_vs_MS.NoTrt_B |
| TIMM22   | 0.03539 | -0.3155 | 0.07  | 0.12 | 1 MS.Trt_vs_MS.NoTrt_B |
| CTSA     | 0.03541 | -0.6762 | 0.562 | 0.65 | 1 MS.Trt_vs_MS.NoTrt_B |
| APOBEC3D | 0.03552 | -0.2566 | 0.51  | 0.6  | 1 MS.Trt_vs_MS.NoTrt_B |

|            |         |         |       |      |   |                      |
|------------|---------|---------|-------|------|---|----------------------|
| BAG2       | 0.03555 | 0.33787 | 0.174 | 0.25 | 1 | MS.Trt_vs_MS.NoTrt_B |
| PXYLP1     | 0.03569 | 0.28132 | 0.353 | 0.47 | 1 | MS.Trt_vs_MS.NoTrt_B |
| CLN8       | 0.0357  | -0.2956 | 0.721 | 0.83 | 1 | MS.Trt_vs_MS.NoTrt_B |
| ATF7IP     | 0.03571 | 0.37257 | 0.749 | 0.83 | 1 | MS.Trt_vs_MS.NoTrt_B |
| GOT2       | 0.03572 | -0.3356 | 0.763 | 0.86 | 1 | MS.Trt_vs_MS.NoTrt_B |
| FAM149A    | 0.03573 | -0.6206 | 0.222 | 0.3  | 1 | MS.Trt_vs_MS.NoTrt_B |
| RPS6KA3    | 0.03594 | 0.44594 | 0.425 | 0.55 | 1 | MS.Trt_vs_MS.NoTrt_B |
| UBA5       | 0.03596 | 0.52584 | 0.098 | 0.16 | 1 | MS.Trt_vs_MS.NoTrt_B |
| TMEM33     | 0.036   | 0.57463 | 0.8   | 0.84 | 1 | MS.Trt_vs_MS.NoTrt_B |
| VPS53      | 0.03603 | 0.32789 | 0.887 | 0.95 | 1 | MS.Trt_vs_MS.NoTrt_B |
| RP11-599B1 | 0.03616 | 0.27584 | 0.248 | 0.35 | 1 | MS.Trt_vs_MS.NoTrt_B |
| HACL1      | 0.03618 | -0.2631 | 0.085 | 0.14 | 1 | MS.Trt_vs_MS.NoTrt_B |
| ZRANB1     | 0.03625 | -0.6739 | 0.061 | 0.11 | 1 | MS.Trt_vs_MS.NoTrt_B |
| SLC3A1     | 0.03626 | 0.65733 | 0.538 | 0.7  | 1 | MS.Trt_vs_MS.NoTrt_B |
| APOBEC3F   | 0.03635 | 0.31477 | 0.795 | 0.88 | 1 | MS.Trt_vs_MS.NoTrt_B |
| TXK        | 0.03636 | 0.61831 | 0.51  | 0.63 | 1 | MS.Trt_vs_MS.NoTrt_B |
| ICAM1      | 0.0364  | 0.48592 | 0.379 | 0.46 | 1 | MS.Trt_vs_MS.NoTrt_B |
| EFCAB10    | 0.03645 | 0.62021 | 0.133 | 0.21 | 1 | MS.Trt_vs_MS.NoTrt_B |
| ATP10B     | 0.03656 | 0.32879 | 0.538 | 0.69 | 1 | MS.Trt_vs_MS.NoTrt_B |
| CDC26      | 0.03659 | 0.41785 | 0.198 | 0.28 | 1 | MS.Trt_vs_MS.NoTrt_B |
| SPTY2D1    | 0.0366  | -0.282  | 0.261 | 0.34 | 1 | MS.Trt_vs_MS.NoTrt_B |
| CCS        | 0.03665 | -0.5924 | 0.15  | 0.22 | 1 | MS.Trt_vs_MS.NoTrt_B |
| TATDN3     | 0.03671 | -0.4248 | 0.697 | 0.82 | 1 | MS.Trt_vs_MS.NoTrt_B |
| CDKN2AIP   | 0.03679 | -0.2715 | 0.057 | 0.1  | 1 | MS.Trt_vs_MS.NoTrt_B |
| MLLT10     | 0.0368  | 0.78188 | 0.253 | 0.33 | 1 | MS.Trt_vs_MS.NoTrt_B |
| TRIM26     | 0.03688 | 0.35107 | 0.142 | 0.21 | 1 | MS.Trt_vs_MS.NoTrt_B |
| C1orf52    | 0.03698 | -0.2736 | 0.216 | 0.29 | 1 | MS.Trt_vs_MS.NoTrt_B |
| IL17RE     | 0.03709 | -0.8675 | 0.174 | 0.24 | 1 | MS.Trt_vs_MS.NoTrt_B |
| ATP10D     | 0.03725 | 0.7879  | 0.251 | 0.35 | 1 | MS.Trt_vs_MS.NoTrt_B |
| TANK       | 0.03734 | -0.3779 | 0.172 | 0.24 | 1 | MS.Trt_vs_MS.NoTrt_B |
| LANCL2     | 0.03755 | 0.38898 | 0.068 | 0.12 | 1 | MS.Trt_vs_MS.NoTrt_B |
| CCNC       | 0.03755 | 0.53185 | 0.492 | 0.62 | 1 | MS.Trt_vs_MS.NoTrt_B |
| PPP3R1     | 0.03757 | 0.34122 | 0.098 | 0.16 | 1 | MS.Trt_vs_MS.NoTrt_B |
| RBFA       | 0.03758 | 0.89306 | 0.205 | 0.29 | 1 | MS.Trt_vs_MS.NoTrt_B |
| LAP3       | 0.03758 | -0.4021 | 0.092 | 0.15 | 1 | MS.Trt_vs_MS.NoTrt_B |
| SLC35A3    | 0.03761 | -0.466  | 0.678 | 0.76 | 1 | MS.Trt_vs_MS.NoTrt_B |
| MRPS31     | 0.03767 | 0.66898 | 0.346 | 0.47 | 1 | MS.Trt_vs_MS.NoTrt_B |
| DUT        | 0.03771 | 0.41226 | 0.118 | 0.18 | 1 | MS.Trt_vs_MS.NoTrt_B |
| IPO8       | 0.03776 | 0.70127 | 0.383 | 0.5  | 1 | MS.Trt_vs_MS.NoTrt_B |
| MECR       | 0.03782 | -1.0071 | 0.224 | 0.3  | 1 | MS.Trt_vs_MS.NoTrt_B |

|          |         |         |       |      |   |                      |
|----------|---------|---------|-------|------|---|----------------------|
| C3orf33  | 0.03783 | 0.28938 | 0.373 | 0.48 | 1 | MS.Trt_vs_MS.NoTrt_B |
| APOBEC3G | 0.03785 | -0.4284 | 0.654 | 0.74 | 1 | MS.Trt_vs_MS.NoTrt_B |
| FAM63A   | 0.03805 | 1.14278 | 0.431 | 0.58 | 1 | MS.Trt_vs_MS.NoTrt_B |
| ODF2     | 0.03812 | -0.297  | 0.397 | 0.48 | 1 | MS.Trt_vs_MS.NoTrt_B |
| ZNF492   | 0.03814 | 0.35153 | 0.486 | 0.4  | 1 | MS.Trt_vs_MS.NoTrt_B |
| RUVBL1   | 0.03818 | 0.95112 | 0.625 | 0.58 | 1 | MS.Trt_vs_MS.NoTrt_B |
| PCDHGA1  | 0.03819 | 0.54417 | 0.211 | 0.3  | 1 | MS.Trt_vs_MS.NoTrt_B |
| SPEN     | 0.03821 | 0.32294 | 0.198 | 0.28 | 1 | MS.Trt_vs_MS.NoTrt_B |
| DENND5B  | 0.03825 | 0.35351 | 0.436 | 0.54 | 1 | MS.Trt_vs_MS.NoTrt_B |
| IGHMBP2  | 0.03825 | -1.0429 | 0.285 | 0.37 | 1 | MS.Trt_vs_MS.NoTrt_B |
| IFT122   | 0.03831 | 0.5724  | 0.734 | 0.88 | 1 | MS.Trt_vs_MS.NoTrt_B |
| GSR      | 0.03837 | -0.4927 | 0.17  | 0.24 | 1 | MS.Trt_vs_MS.NoTrt_B |
| TRIM44   | 0.03838 | 0.47972 | 0.187 | 0.27 | 1 | MS.Trt_vs_MS.NoTrt_B |
| SLC16A7  | 0.03849 | -0.5138 | 0.512 | 0.6  | 1 | MS.Trt_vs_MS.NoTrt_B |
| AURKA    | 0.03856 | 1.72642 | 0.227 | 0.3  | 1 | MS.Trt_vs_MS.NoTrt_B |
| ARMT1    | 0.03874 | 0.37132 | 0.057 | 0.1  | 1 | MS.Trt_vs_MS.NoTrt_B |
| PHACTR2  | 0.03877 | 0.99664 | 0.41  | 0.5  | 1 | MS.Trt_vs_MS.NoTrt_B |
| TRAPPC10 | 0.03877 | 0.346   | 0.168 | 0.24 | 1 | MS.Trt_vs_MS.NoTrt_B |
| ZNF594   | 0.0388  | 1.26569 | 0.353 | 0.45 | 1 | MS.Trt_vs_MS.NoTrt_B |
| TMX3     | 0.03883 | 0.91285 | 0.301 | 0.41 | 1 | MS.Trt_vs_MS.NoTrt_B |
| NUDT22   | 0.03887 | 0.36301 | 0.582 | 0.65 | 1 | MS.Trt_vs_MS.NoTrt_B |
| PFKFB3   | 0.03889 | 0.42994 | 0.157 | 0.23 | 1 | MS.Trt_vs_MS.NoTrt_B |
| POLK     | 0.03891 | 0.6924  | 0.678 | 0.79 | 1 | MS.Trt_vs_MS.NoTrt_B |
| TDRD3    | 0.03893 | -0.2994 | 0.473 | 0.55 | 1 | MS.Trt_vs_MS.NoTrt_B |
| SIPA1    | 0.039   | -0.3185 | 0.481 | 0.59 | 1 | MS.Trt_vs_MS.NoTrt_B |
| KIF3B    | 0.03903 | -0.82   | 0.325 | 0.4  | 1 | MS.Trt_vs_MS.NoTrt_B |
| FAM220A  | 0.03917 | -0.2949 | 0.24  | 0.31 | 1 | MS.Trt_vs_MS.NoTrt_B |
| FADS1    | 0.03932 | -0.3208 | 0.508 | 0.6  | 1 | MS.Trt_vs_MS.NoTrt_B |
| RNF14    | 0.03939 | 0.30449 | 0.477 | 0.63 | 1 | MS.Trt_vs_MS.NoTrt_B |
| TOMM70   | 0.03951 | 0.51731 | 0.087 | 0.14 | 1 | MS.Trt_vs_MS.NoTrt_B |
| TBC1D7   | 0.03955 | 0.31719 | 0.39  | 0.48 | 1 | MS.Trt_vs_MS.NoTrt_B |
| ATP6AP1  | 0.03958 | -0.4306 | 0.364 | 0.42 | 1 | MS.Trt_vs_MS.NoTrt_B |
| ESYT3    | 0.03968 | 0.56623 | 0.388 | 0.51 | 1 | MS.Trt_vs_MS.NoTrt_B |
| PARP14   | 0.03972 | 0.35832 | 0.32  | 0.39 | 1 | MS.Trt_vs_MS.NoTrt_B |
| LTBP4    | 0.03976 | -0.2603 | 0.423 | 0.49 | 1 | MS.Trt_vs_MS.NoTrt_B |
| GJB7     | 0.03988 | 0.62289 | 0.083 | 0.14 | 1 | MS.Trt_vs_MS.NoTrt_B |
| DCP1A    | 0.04005 | -0.4453 | 0.292 | 0.37 | 1 | MS.Trt_vs_MS.NoTrt_B |
| NASP     | 0.04021 | 0.67315 | 0.856 | 0.88 | 1 | MS.Trt_vs_MS.NoTrt_B |
| VPS54    | 0.04026 | 0.47147 | 0.327 | 0.43 | 1 | MS.Trt_vs_MS.NoTrt_B |
| HSPA4L   | 0.04029 | 0.29655 | 0.834 | 0.86 | 1 | MS.Trt_vs_MS.NoTrt_B |

|            |         |         |       |      |                        |
|------------|---------|---------|-------|------|------------------------|
| DPP9       | 0.0403  | -0.3524 | 0.577 | 0.66 | 1 MS.Trt_vs_MS.NoTrt_B |
| FUT10      | 0.0404  | 0.9057  | 0.277 | 0.35 | 1 MS.Trt_vs_MS.NoTrt_B |
| ANKS3      | 0.04041 | -0.4551 | 0.571 | 0.7  | 1 MS.Trt_vs_MS.NoTrt_B |
| GGA1       | 0.04052 | 0.33819 | 0.895 | 0.97 | 1 MS.Trt_vs_MS.NoTrt_B |
| PYROXD2    | 0.04059 | 0.25595 | 0.115 | 0.18 | 1 MS.Trt_vs_MS.NoTrt_B |
| SEC22B     | 0.04067 | 0.59062 | 0.739 | 0.84 | 1 MS.Trt_vs_MS.NoTrt_B |
| JMJD4      | 0.0407  | -0.7163 | 0.2   | 0.28 | 1 MS.Trt_vs_MS.NoTrt_B |
| ARMC10     | 0.04074 | 0.47806 | 0.503 | 0.64 | 1 MS.Trt_vs_MS.NoTrt_B |
| C5orf42    | 0.04082 | 1.26031 | 0.392 | 0.5  | 1 MS.Trt_vs_MS.NoTrt_B |
| CDV3       | 0.04102 | 0.33988 | 0.192 | 0.27 | 1 MS.Trt_vs_MS.NoTrt_B |
| CARS       | 0.04106 | -0.2993 | 0.654 | 0.75 | 1 MS.Trt_vs_MS.NoTrt_B |
| ZNF81      | 0.04109 | 0.42118 | 0.19  | 0.27 | 1 MS.Trt_vs_MS.NoTrt_B |
| SIL1       | 0.0411  | -0.3353 | 0.061 | 0.11 | 1 MS.Trt_vs_MS.NoTrt_B |
| AIFM2      | 0.0411  | 0.63622 | 0.259 | 0.35 | 1 MS.Trt_vs_MS.NoTrt_B |
| DYRK2      | 0.04115 | 0.37526 | 0.135 | 0.2  | 1 MS.Trt_vs_MS.NoTrt_B |
| CSNK1A1    | 0.04128 | 0.34582 | 0.791 | 0.82 | 1 MS.Trt_vs_MS.NoTrt_B |
| KIAA0586   | 0.04135 | 0.47307 | 0.71  | 0.81 | 1 MS.Trt_vs_MS.NoTrt_B |
| PRRC2B     | 0.04137 | 0.53802 | 0.179 | 0.25 | 1 MS.Trt_vs_MS.NoTrt_B |
| E2F3       | 0.0414  | 0.60752 | 0.129 | 0.2  | 1 MS.Trt_vs_MS.NoTrt_B |
| XRCC2      | 0.04148 | 0.27515 | 0.636 | 0.85 | 1 MS.Trt_vs_MS.NoTrt_B |
| LXN        | 0.04155 | 0.73642 | 0.113 | 0.17 | 1 MS.Trt_vs_MS.NoTrt_B |
| TSPAN6     | 0.04159 | 0.29195 | 0.418 | 0.55 | 1 MS.Trt_vs_MS.NoTrt_B |
| RAPGEF6    | 0.04164 | 0.46097 | 0.442 | 0.54 | 1 MS.Trt_vs_MS.NoTrt_B |
| RASSF2     | 0.04165 | 0.25294 | 0.261 | 0.35 | 1 MS.Trt_vs_MS.NoTrt_B |
| CTD-2331H1 | 0.04166 | -0.9462 | 0.137 | 0.21 | 1 MS.Trt_vs_MS.NoTrt_B |
| DCUN1D4    | 0.04168 | 0.99652 | 0.227 | 0.31 | 1 MS.Trt_vs_MS.NoTrt_B |
| PJA2       | 0.04171 | 0.51926 | 0.203 | 0.28 | 1 MS.Trt_vs_MS.NoTrt_B |
| DNAJC11    | 0.04183 | -0.5412 | 0.135 | 0.2  | 1 MS.Trt_vs_MS.NoTrt_B |
| C22orf29   | 0.04184 | -0.3568 | 0.346 | 0.42 | 1 MS.Trt_vs_MS.NoTrt_B |
| ZFAT       | 0.04194 | -0.6769 | 0.227 | 0.31 | 1 MS.Trt_vs_MS.NoTrt_B |
| CD180      | 0.04216 | 0.29084 | 0.209 | 0.29 | 1 MS.Trt_vs_MS.NoTrt_B |
| ZNF211     | 0.04221 | 0.46219 | 0.159 | 0.23 | 1 MS.Trt_vs_MS.NoTrt_B |
| NMRAL1     | 0.04226 | 0.60993 | 0.373 | 0.48 | 1 MS.Trt_vs_MS.NoTrt_B |
| SLC25A51   | 0.0423  | 0.38613 | 0.466 | 0.57 | 1 MS.Trt_vs_MS.NoTrt_B |
| RB1        | 0.04251 | 0.47086 | 0.111 | 0.17 | 1 MS.Trt_vs_MS.NoTrt_B |
| STX18      | 0.04259 | -0.4601 | 0.102 | 0.16 | 1 MS.Trt_vs_MS.NoTrt_B |
| APIP       | 0.04263 | -0.4358 | 0.407 | 0.48 | 1 MS.Trt_vs_MS.NoTrt_B |
| NDUFS6     | 0.04263 | 0.51862 | 0.105 | 0.17 | 1 MS.Trt_vs_MS.NoTrt_B |
| MAP1S      | 0.04268 | -0.3654 | 0.521 | 0.6  | 1 MS.Trt_vs_MS.NoTrt_B |
| MBD5       | 0.04273 | 0.78422 | 0.706 | 0.88 | 1 MS.Trt_vs_MS.NoTrt_B |

|            |         |         |       |      |                        |
|------------|---------|---------|-------|------|------------------------|
| ATMIN      | 0.04295 | 0.77764 | 0.192 | 0.27 | 1 MS.Trt_vs_MS.NoTrt_B |
| REXO2      | 0.04295 | 0.25709 | 0.148 | 0.22 | 1 MS.Trt_vs_MS.NoTrt_B |
| RUFY3      | 0.04299 | 0.77723 | 0.397 | 0.51 | 1 MS.Trt_vs_MS.NoTrt_B |
| PKIG       | 0.0432  | 0.77966 | 0.523 | 0.54 | 1 MS.Trt_vs_MS.NoTrt_B |
| TEX14      | 0.04321 | 1.23218 | 0.059 | 0.11 | 1 MS.Trt_vs_MS.NoTrt_B |
| HSH2D      | 0.04345 | -0.6902 | 0.514 | 0.63 | 1 MS.Trt_vs_MS.NoTrt_B |
| ZNHIT6     | 0.04348 | -0.5458 | 0.292 | 0.38 | 1 MS.Trt_vs_MS.NoTrt_B |
| MAD2L1BP   | 0.0435  | -0.5418 | 0.109 | 0.16 | 1 MS.Trt_vs_MS.NoTrt_B |
| ZEB1       | 0.04354 | 0.91748 | 0.438 | 0.56 | 1 MS.Trt_vs_MS.NoTrt_B |
| TPCN2      | 0.04377 | 0.6281  | 0.449 | 0.57 | 1 MS.Trt_vs_MS.NoTrt_B |
| MOCS3      | 0.04405 | 0.52704 | 0.688 | 0.81 | 1 MS.Trt_vs_MS.NoTrt_B |
| KLHL20     | 0.04412 | -0.2589 | 0.094 | 0.15 | 1 MS.Trt_vs_MS.NoTrt_B |
| RP9        | 0.04436 | -0.3    | 0.061 | 0.11 | 1 MS.Trt_vs_MS.NoTrt_B |
| C2orf49    | 0.04438 | 0.74488 | 0.32  | 0.42 | 1 MS.Trt_vs_MS.NoTrt_B |
| SON        | 0.04439 | 0.28211 | 0.847 | 0.97 | 1 MS.Trt_vs_MS.NoTrt_B |
| CEP85L     | 0.04446 | 0.25973 | 0.222 | 0.3  | 1 MS.Trt_vs_MS.NoTrt_B |
| HEBP2      | 0.04466 | 1.00943 | 0.292 | 0.37 | 1 MS.Trt_vs_MS.NoTrt_B |
| TAB1       | 0.04472 | -0.2898 | 0.065 | 0.11 | 1 MS.Trt_vs_MS.NoTrt_B |
| ZC3H18     | 0.04479 | 0.48117 | 0.582 | 0.71 | 1 MS.Trt_vs_MS.NoTrt_B |
| MRFAP1     | 0.04489 | -0.4499 | 0.22  | 0.29 | 1 MS.Trt_vs_MS.NoTrt_B |
| RFX2       | 0.04497 | 0.47032 | 0.401 | 0.49 | 1 MS.Trt_vs_MS.NoTrt_B |
| ZNF568     | 0.04509 | -0.4517 | 0.706 | 0.81 | 1 MS.Trt_vs_MS.NoTrt_B |
| RSRC1      | 0.0452  | 0.30308 | 0.599 | 0.71 | 1 MS.Trt_vs_MS.NoTrt_B |
| EID2B      | 0.04531 | -0.8172 | 0.414 | 0.5  | 1 MS.Trt_vs_MS.NoTrt_B |
| ERCC2      | 0.04565 | 0.32354 | 0.425 | 0.51 | 1 MS.Trt_vs_MS.NoTrt_B |
| NEIL2      | 0.04598 | 0.36785 | 0.072 | 0.12 | 1 MS.Trt_vs_MS.NoTrt_B |
| ZNF429     | 0.04598 | -0.2847 | 0.817 | 0.92 | 1 MS.Trt_vs_MS.NoTrt_B |
| AL592183.1 | 0.04621 | 0.30052 | 0.078 | 0.13 | 1 MS.Trt_vs_MS.NoTrt_B |
| ADIPOQ     | 0.04624 | -0.2601 | 0.473 | 0.61 | 1 MS.Trt_vs_MS.NoTrt_B |
| STRC       | 0.0466  | 0.94729 | 0.427 | 0.51 | 1 MS.Trt_vs_MS.NoTrt_B |
| SPDYA      | 0.04675 | 1.01121 | 0.061 | 0.11 | 1 MS.Trt_vs_MS.NoTrt_B |
| TSPAN17    | 0.04681 | -0.4181 | 0.068 | 0.11 | 1 MS.Trt_vs_MS.NoTrt_B |
| DNASE1L1   | 0.04685 | -0.4083 | 0.063 | 0.11 | 1 MS.Trt_vs_MS.NoTrt_B |
| GPD1L      | 0.04698 | 1.0049  | 0.078 | 0.13 | 1 MS.Trt_vs_MS.NoTrt_B |
| SNRNP27    | 0.04699 | 0.53573 | 0.218 | 0.31 | 1 MS.Trt_vs_MS.NoTrt_B |
| CCDC137    | 0.04709 | 0.85101 | 0.166 | 0.23 | 1 MS.Trt_vs_MS.NoTrt_B |
| MRM3       | 0.04713 | 0.3054  | 0.2   | 0.28 | 1 MS.Trt_vs_MS.NoTrt_B |
| PNN        | 0.04725 | 0.25632 | 0.251 | 0.34 | 1 MS.Trt_vs_MS.NoTrt_B |
| NBPF1      | 0.04742 | 0.29926 | 0.174 | 0.25 | 1 MS.Trt_vs_MS.NoTrt_B |
| RNPEP      | 0.04742 | -0.321  | 0.059 | 0.1  | 1 MS.Trt_vs_MS.NoTrt_B |

|            |         |         |       |      |                        |
|------------|---------|---------|-------|------|------------------------|
| NFE2L2     | 0.04743 | 0.28726 | 0.405 | 0.5  | 1 MS.Trt_vs_MS.NoTrt_B |
| ABLIM1     | 0.04756 | 0.46155 | 0.322 | 0.43 | 1 MS.Trt_vs_MS.NoTrt_B |
| AFF3       | 0.04759 | 0.63698 | 0.599 | 0.73 | 1 MS.Trt_vs_MS.NoTrt_B |
| PLAC8      | 0.04777 | 0.32746 | 0.632 | 0.77 | 1 MS.Trt_vs_MS.NoTrt_B |
| MYSM1      | 0.04778 | 0.55571 | 0.146 | 0.21 | 1 MS.Trt_vs_MS.NoTrt_B |
| GALNS      | 0.0478  | -0.7768 | 0.42  | 0.5  | 1 MS.Trt_vs_MS.NoTrt_B |
| CTD-2370NE | 0.04794 | 0.25123 | 0.092 | 0.15 | 1 MS.Trt_vs_MS.NoTrt_B |
| NDUFB1     | 0.048   | 0.37827 | 0.649 | 0.77 | 1 MS.Trt_vs_MS.NoTrt_B |
| RBCK1      | 0.04816 | 0.28904 | 0.161 | 0.23 | 1 MS.Trt_vs_MS.NoTrt_B |
| QRICH2     | 0.0482  | -0.501  | 0.12  | 0.18 | 1 MS.Trt_vs_MS.NoTrt_B |
| SEC23B     | 0.04825 | -0.3656 | 0.085 | 0.14 | 1 MS.Trt_vs_MS.NoTrt_B |
| ZKSCAN8    | 0.0483  | 1.6512  | 0.209 | 0.29 | 1 MS.Trt_vs_MS.NoTrt_B |
| IRF7       | 0.04845 | -0.4623 | 0.072 | 0.12 | 1 MS.Trt_vs_MS.NoTrt_B |
| C14orf132  | 0.04848 | 0.25406 | 0.205 | 0.28 | 1 MS.Trt_vs_MS.NoTrt_B |
| BSCL2      | 0.04849 | -0.4663 | 0.176 | 0.24 | 1 MS.Trt_vs_MS.NoTrt_B |
| ATM        | 0.0485  | 0.50393 | 0.898 | 0.98 | 1 MS.Trt_vs_MS.NoTrt_B |
| MRPS14     | 0.04851 | 0.86561 | 0.111 | 0.17 | 1 MS.Trt_vs_MS.NoTrt_B |
| COA4       | 0.04851 | 0.41308 | 0.216 | 0.3  | 1 MS.Trt_vs_MS.NoTrt_B |
| TGIF2      | 0.0486  | -0.349  | 0.255 | 0.32 | 1 MS.Trt_vs_MS.NoTrt_B |
| ZNF286B    | 0.04871 | 1.13043 | 0.357 | 0.48 | 1 MS.Trt_vs_MS.NoTrt_B |
| SLC9A1     | 0.04872 | -0.5271 | 0.166 | 0.23 | 1 MS.Trt_vs_MS.NoTrt_B |
| GOLGA1     | 0.04874 | 0.25986 | 0.081 | 0.13 | 1 MS.Trt_vs_MS.NoTrt_B |
| TLK2       | 0.04876 | 0.54354 | 0.272 | 0.35 | 1 MS.Trt_vs_MS.NoTrt_B |
| ZNF564     | 0.04879 | 0.69911 | 0.519 | 0.65 | 1 MS.Trt_vs_MS.NoTrt_B |
| ZMYND8     | 0.04897 | 0.50474 | 0.224 | 0.3  | 1 MS.Trt_vs_MS.NoTrt_B |
| ACER3      | 0.04906 | 0.3023  | 0.427 | 0.52 | 1 MS.Trt_vs_MS.NoTrt_B |
| GOLGA2     | 0.04908 | -0.4138 | 0.503 | 0.65 | 1 MS.Trt_vs_MS.NoTrt_B |
| KIF21A     | 0.04909 | 0.82831 | 0.105 | 0.16 | 1 MS.Trt_vs_MS.NoTrt_B |
| SNRNP48    | 0.04911 | 0.65982 | 0.139 | 0.21 | 1 MS.Trt_vs_MS.NoTrt_B |
| DOT1L      | 0.0492  | 0.58588 | 0.627 | 0.77 | 1 MS.Trt_vs_MS.NoTrt_B |
| MCRS1      | 0.04922 | 0.32121 | 0.144 | 0.21 | 1 MS.Trt_vs_MS.NoTrt_B |
| MYL6       | 0.0493  | 0.287   | 0.682 | 0.85 | 1 MS.Trt_vs_MS.NoTrt_B |
| GRK5       | 0.04934 | -0.3486 | 0.111 | 0.17 | 1 MS.Trt_vs_MS.NoTrt_B |
| FAM65B     | 0.04957 | 0.53641 | 0.545 | 0.67 | 1 MS.Trt_vs_MS.NoTrt_B |
| PMAIP1     | 0.04968 | -0.3922 | 0.068 | 0.11 | 1 MS.Trt_vs_MS.NoTrt_B |
| KIF13A     | 0.0497  | 0.76248 | 0.224 | 0.3  | 1 MS.Trt_vs_MS.NoTrt_B |
| C16orf74   | 0.0497  | -0.3033 | 0.181 | 0.24 | 1 MS.Trt_vs_MS.NoTrt_B |
| SPARCL1    | 0.04985 | 0.4121  | 0.131 | 0.08 | 1 MS.Trt_vs_MS.NoTrt_B |
| FCER1G     | 0.05    | 0.5169  | 0.505 | 0.62 | 1 MS.Trt_vs_MS.NoTrt_B |
| PHF20L1    | 0.05031 | -0.5414 | 0.514 | 0.62 | 1 MS.Trt_vs_MS.NoTrt_B |



|          |         |         |       |      |   |                      |
|----------|---------|---------|-------|------|---|----------------------|
| ATP6V0D1 | 0.0505  | -0.7528 | 0.573 | 0.62 | 1 | MS.Trt_vs_MS.NoTrt_B |
| CSAD     | 0.0505  | 0.29514 | 0.68  | 0.81 | 1 | MS.Trt_vs_MS.NoTrt_B |
| FDX1     | 0.05052 | 0.59155 | 0.211 | 0.29 | 1 | MS.Trt_vs_MS.NoTrt_B |
| ASCC3    | 0.05053 | 0.80728 | 0.203 | 0.29 | 1 | MS.Trt_vs_MS.NoTrt_B |
| RIC8A    | 0.05062 | -0.2808 | 0.157 | 0.22 | 1 | MS.Trt_vs_MS.NoTrt_B |
| CD93     | 0.05068 | -0.6618 | 0.118 | 0.17 | 1 | MS.Trt_vs_MS.NoTrt_B |
| BOD1L1   | 0.0507  | 0.69986 | 0.593 | 0.73 | 1 | MS.Trt_vs_MS.NoTrt_B |
| PRR14    | 0.05092 | 0.43382 | 0.1   | 0.16 | 1 | MS.Trt_vs_MS.NoTrt_B |
| MITD1    | 0.05098 | 0.39382 | 0.865 | 0.96 | 1 | MS.Trt_vs_MS.NoTrt_B |
| SMIM15   | 0.05113 | 0.32392 | 0.063 | 0.11 | 1 | MS.Trt_vs_MS.NoTrt_B |
| RASGEF1B | 0.05123 | 0.28071 | 0.614 | 0.72 | 1 | MS.Trt_vs_MS.NoTrt_B |
| ATP1A4   | 0.05147 | 0.34352 | 0.734 | 0.75 | 1 | MS.Trt_vs_MS.NoTrt_B |
| PMS2     | 0.05162 | 0.50247 | 0.558 | 0.7  | 1 | MS.Trt_vs_MS.NoTrt_B |
| ZDHHC7   | 0.05191 | -0.3751 | 0.124 | 0.18 | 1 | MS.Trt_vs_MS.NoTrt_B |
| ZNF543   | 0.05207 | 1.02567 | 0.342 | 0.45 | 1 | MS.Trt_vs_MS.NoTrt_B |
| THAP12   | 0.05235 | 0.61135 | 0.464 | 0.59 | 1 | MS.Trt_vs_MS.NoTrt_B |
| WDR19    | 0.05236 | -0.5748 | 0.418 | 0.51 | 1 | MS.Trt_vs_MS.NoTrt_B |
| MRPL10   | 0.05244 | -0.4672 | 0.301 | 0.39 | 1 | MS.Trt_vs_MS.NoTrt_B |
| RRM2B    | 0.05255 | 0.95509 | 0.087 | 0.14 | 1 | MS.Trt_vs_MS.NoTrt_B |
| COX7B    | 0.05257 | -0.4245 | 0.42  | 0.5  | 1 | MS.Trt_vs_MS.NoTrt_B |
| RASA1    | 0.05269 | 0.77266 | 0.159 | 0.22 | 1 | MS.Trt_vs_MS.NoTrt_B |
| SSSCA1   | 0.05276 | -0.3384 | 0.059 | 0.1  | 1 | MS.Trt_vs_MS.NoTrt_B |
| MED1     | 0.05302 | -0.6752 | 0.268 | 0.34 | 1 | MS.Trt_vs_MS.NoTrt_B |
| CD40     | 0.05302 | -0.5669 | 0.094 | 0.15 | 1 | MS.Trt_vs_MS.NoTrt_B |
| ZNF649   | 0.05312 | -0.6373 | 0.135 | 0.2  | 1 | MS.Trt_vs_MS.NoTrt_B |
| GABPB2   | 0.05318 | 0.28868 | 0.917 | 0.97 | 1 | MS.Trt_vs_MS.NoTrt_B |
| ZNF565   | 0.05327 | 1.4914  | 0.063 | 0.11 | 1 | MS.Trt_vs_MS.NoTrt_B |
| RFWD2    | 0.05328 | 1.00333 | 0.268 | 0.34 | 1 | MS.Trt_vs_MS.NoTrt_B |
| BLMH     | 0.05333 | -0.504  | 0.545 | 0.63 | 1 | MS.Trt_vs_MS.NoTrt_B |
| IQCB1    | 0.05348 | 0.48261 | 0.063 | 0.11 | 1 | MS.Trt_vs_MS.NoTrt_B |
| CASZ1    | 0.05366 | -0.5956 | 0.155 | 0.22 | 1 | MS.Trt_vs_MS.NoTrt_B |
| BTG1     | 0.05369 | 0.33475 | 0.516 | 0.63 | 1 | MS.Trt_vs_MS.NoTrt_B |
| LPIN2    | 0.05373 | 0.56413 | 0.087 | 0.14 | 1 | MS.Trt_vs_MS.NoTrt_B |
| EXOC1    | 0.05382 | 0.58984 | 0.135 | 0.2  | 1 | MS.Trt_vs_MS.NoTrt_B |
| SZRD1    | 0.05392 | 0.2889  | 0.135 | 0.2  | 1 | MS.Trt_vs_MS.NoTrt_B |
| TMEM108  | 0.05424 | -0.7916 | 0.244 | 0.31 | 1 | MS.Trt_vs_MS.NoTrt_B |
| CTF1     | 0.05424 | -0.4931 | 0.17  | 0.24 | 1 | MS.Trt_vs_MS.NoTrt_B |
| STAT2    | 0.05438 | 0.36346 | 0.843 | 0.92 | 1 | MS.Trt_vs_MS.NoTrt_B |
| NOL4L    | 0.05439 | 0.60699 | 0.551 | 0.69 | 1 | MS.Trt_vs_MS.NoTrt_B |
| XYLT2    | 0.05454 | 0.43456 | 0.523 | 0.62 | 1 | MS.Trt_vs_MS.NoTrt_B |

|          |         |         |       |      |                        |
|----------|---------|---------|-------|------|------------------------|
| PRKACA   | 0.05456 | -0.4101 | 0.146 | 0.21 | 1 MS.Trt_vs_MS.NoTrt_B |
| RPS26    | 0.05475 | 0.38041 | 0.68  | 0.75 | 1 MS.Trt_vs_MS.NoTrt_B |
| MTX3     | 0.05495 | 0.38598 | 0.545 | 0.64 | 1 MS.Trt_vs_MS.NoTrt_B |
| DEPDC5   | 0.05499 | -0.3277 | 0.68  | 0.77 | 1 MS.Trt_vs_MS.NoTrt_B |
| DIMT1    | 0.05502 | 0.3004  | 0.113 | 0.17 | 1 MS.Trt_vs_MS.NoTrt_B |
| GPCPD1   | 0.05518 | 0.97371 | 0.203 | 0.29 | 1 MS.Trt_vs_MS.NoTrt_B |
| ZDHHC18  | 0.05531 | -0.3782 | 0.059 | 0.1  | 1 MS.Trt_vs_MS.NoTrt_B |
| DBP      | 0.05536 | -0.2529 | 0.54  | 0.65 | 1 MS.Trt_vs_MS.NoTrt_B |
| ANKRD13A | 0.05547 | 0.4448  | 0.712 | 0.81 | 1 MS.Trt_vs_MS.NoTrt_B |
| PLK3     | 0.05553 | -0.3542 | 0.577 | 0.68 | 1 MS.Trt_vs_MS.NoTrt_B |
| PLEKHB1  | 0.05566 | -0.8725 | 0.065 | 0.11 | 1 MS.Trt_vs_MS.NoTrt_B |
| H2AFV    | 0.0557  | 0.44802 | 0.514 | 0.61 | 1 MS.Trt_vs_MS.NoTrt_B |
| ZMYM4    | 0.05571 | 0.59795 | 0.078 | 0.12 | 1 MS.Trt_vs_MS.NoTrt_B |
| NUP62    | 0.05573 | -0.2714 | 0.399 | 0.48 | 1 MS.Trt_vs_MS.NoTrt_B |
| NFATC3   | 0.05577 | 0.5182  | 0.499 | 0.58 | 1 MS.Trt_vs_MS.NoTrt_B |
| TRPV1    | 0.05587 | -1.3194 | 0.288 | 0.39 | 1 MS.Trt_vs_MS.NoTrt_B |
| ZNF267   | 0.05601 | 0.64754 | 0.081 | 0.13 | 1 MS.Trt_vs_MS.NoTrt_B |
| IRF2BP2  | 0.05606 | 1.46346 | 0.174 | 0.12 | 1 MS.Trt_vs_MS.NoTrt_B |
| SH2D1A   | 0.05619 | 0.7738  | 0.159 | 0.22 | 1 MS.Trt_vs_MS.NoTrt_B |
| TIGAR    | 0.05633 | 0.29843 | 0.808 | 0.91 | 1 MS.Trt_vs_MS.NoTrt_B |
| IWS1     | 0.05643 | 0.25077 | 0.094 | 0.15 | 1 MS.Trt_vs_MS.NoTrt_B |
| KMT2A    | 0.05649 | 0.42007 | 0.856 | 0.93 | 1 MS.Trt_vs_MS.NoTrt_B |
| ZNF782   | 0.05657 | 0.80815 | 0.085 | 0.14 | 1 MS.Trt_vs_MS.NoTrt_B |
| SPDYE1   | 0.05659 | 0.32307 | 0.407 | 0.52 | 1 MS.Trt_vs_MS.NoTrt_B |
| NCOA2    | 0.05661 | 0.37558 | 0.183 | 0.25 | 1 MS.Trt_vs_MS.NoTrt_B |
| PSIP1    | 0.05688 | 0.39752 | 0.691 | 0.81 | 1 MS.Trt_vs_MS.NoTrt_B |
| RPF1     | 0.05696 | 0.42485 | 0.214 | 0.29 | 1 MS.Trt_vs_MS.NoTrt_B |
| TOR4A    | 0.05706 | 0.54378 | 0.129 | 0.19 | 1 MS.Trt_vs_MS.NoTrt_B |
| NPIPA7   | 0.05712 | 0.67892 | 0.124 | 0.19 | 1 MS.Trt_vs_MS.NoTrt_B |
| MDFIC    | 0.05721 | 0.49339 | 0.261 | 0.35 | 1 MS.Trt_vs_MS.NoTrt_B |
| RBM26    | 0.05726 | 0.66102 | 0.392 | 0.5  | 1 MS.Trt_vs_MS.NoTrt_B |
| TECPR2   | 0.05726 | 0.65906 | 0.248 | 0.34 | 1 MS.Trt_vs_MS.NoTrt_B |
| APOOL    | 0.05731 | 0.73973 | 0.647 | 0.78 | 1 MS.Trt_vs_MS.NoTrt_B |
| ATP1B1   | 0.05745 | -1.064  | 0.172 | 0.23 | 1 MS.Trt_vs_MS.NoTrt_B |
| NOL11    | 0.05755 | -0.4601 | 0.418 | 0.49 | 1 MS.Trt_vs_MS.NoTrt_B |
| PCIF1    | 0.05792 | 0.32264 | 0.268 | 0.35 | 1 MS.Trt_vs_MS.NoTrt_B |
| PTRH1    | 0.05793 | -0.4439 | 0.603 | 0.74 | 1 MS.Trt_vs_MS.NoTrt_B |
| TPRG1L   | 0.05803 | 1.8834  | 0.176 | 0.24 | 1 MS.Trt_vs_MS.NoTrt_B |
| TTC19    | 0.0583  | 0.41851 | 0.684 | 0.75 | 1 MS.Trt_vs_MS.NoTrt_B |
| YBX3     | 0.05849 | 0.48722 | 0.608 | 0.74 | 1 MS.Trt_vs_MS.NoTrt_B |

|          |         |         |       |      |                        |
|----------|---------|---------|-------|------|------------------------|
| MSH3     | 0.05888 | 0.45997 | 0.292 | 0.4  | 1 MS.Trt_vs_MS.NoTrt_B |
| FCHO2    | 0.05908 | 0.62746 | 0.22  | 0.3  | 1 MS.Trt_vs_MS.NoTrt_B |
| ARPC4    | 0.05922 | 0.34218 | 0.588 | 0.75 | 1 MS.Trt_vs_MS.NoTrt_B |
| BTBD1    | 0.05931 | -0.3422 | 0.471 | 0.57 | 1 MS.Trt_vs_MS.NoTrt_B |
| PREPL    | 0.05932 | 0.376   | 0.551 | 0.67 | 1 MS.Trt_vs_MS.NoTrt_B |
| GOLGB1   | 0.05966 | 0.26908 | 0.438 | 0.51 | 1 MS.Trt_vs_MS.NoTrt_B |
| RAI1     | 0.05987 | 0.31901 | 0.146 | 0.21 | 1 MS.Trt_vs_MS.NoTrt_B |
| ZNF2     | 0.06004 | 1.25368 | 0.266 | 0.36 | 1 MS.Trt_vs_MS.NoTrt_B |
| DOPEY1   | 0.06011 | 1.22052 | 0.224 | 0.31 | 1 MS.Trt_vs_MS.NoTrt_B |
| VNN3     | 0.06013 | 0.60777 | 0.257 | 0.37 | 1 MS.Trt_vs_MS.NoTrt_B |
| ZDHHC20  | 0.06015 | 0.37343 | 0.359 | 0.44 | 1 MS.Trt_vs_MS.NoTrt_B |
| MRPL30   | 0.06024 | 0.51531 | 0.658 | 0.77 | 1 MS.Trt_vs_MS.NoTrt_B |
| FAM160A1 | 0.06049 | 0.76313 | 0.131 | 0.19 | 1 MS.Trt_vs_MS.NoTrt_B |
| RYK      | 0.06057 | 0.25391 | 0.063 | 0.11 | 1 MS.Trt_vs_MS.NoTrt_B |
| WDFY1    | 0.0607  | 0.43443 | 0.242 | 0.33 | 1 MS.Trt_vs_MS.NoTrt_B |
| NQO1     | 0.06087 | -0.5483 | 0.46  | 0.52 | 1 MS.Trt_vs_MS.NoTrt_B |
| TCF7     | 0.06095 | 0.75628 | 0.758 | 0.73 | 1 MS.Trt_vs_MS.NoTrt_B |
| L3MBTL3  | 0.06104 | -0.7803 | 0.1   | 0.15 | 1 MS.Trt_vs_MS.NoTrt_B |
| ERH      | 0.06114 | 0.33028 | 0.192 | 0.26 | 1 MS.Trt_vs_MS.NoTrt_B |
| RAD9B    | 0.06133 | 0.30993 | 0.288 | 0.37 | 1 MS.Trt_vs_MS.NoTrt_B |
| MS4A10   | 0.06142 | 0.25245 | 0.617 | 0.56 | 1 MS.Trt_vs_MS.NoTrt_B |
| ACO2     | 0.06196 | -0.2752 | 0.092 | 0.14 | 1 MS.Trt_vs_MS.NoTrt_B |
| FBXO21   | 0.06198 | -0.3602 | 0.113 | 0.17 | 1 MS.Trt_vs_MS.NoTrt_B |
| CDH26    | 0.06209 | -0.3297 | 0.096 | 0.15 | 1 MS.Trt_vs_MS.NoTrt_B |
| COX19    | 0.0621  | -0.2956 | 0.503 | 0.61 | 1 MS.Trt_vs_MS.NoTrt_B |
| PAPOLG   | 0.06212 | 0.63594 | 0.647 | 0.78 | 1 MS.Trt_vs_MS.NoTrt_B |
| PRPF39   | 0.06225 | 0.35424 | 0.235 | 0.3  | 1 MS.Trt_vs_MS.NoTrt_B |
| STK24    | 0.06228 | 0.75708 | 0.196 | 0.27 | 1 MS.Trt_vs_MS.NoTrt_B |
| SSRP1    | 0.06234 | -0.3219 | 0.087 | 0.14 | 1 MS.Trt_vs_MS.NoTrt_B |
| MRPL41   | 0.06235 | 0.56734 | 0.131 | 0.2  | 1 MS.Trt_vs_MS.NoTrt_B |
| ZNF417   | 0.06235 | 0.25057 | 0.647 | 0.75 | 1 MS.Trt_vs_MS.NoTrt_B |
| GTSF1    | 0.06257 | -0.5727 | 0.153 | 0.22 | 1 MS.Trt_vs_MS.NoTrt_B |
| F2RL2    | 0.06267 | -0.4267 | 0.198 | 0.26 | 1 MS.Trt_vs_MS.NoTrt_B |
| DHX34    | 0.06287 | -0.6341 | 0.061 | 0.1  | 1 MS.Trt_vs_MS.NoTrt_B |
| ZNF585A  | 0.06297 | 0.68651 | 0.244 | 0.31 | 1 MS.Trt_vs_MS.NoTrt_B |
| ZNF225   | 0.063   | -0.2749 | 0.678 | 0.74 | 1 MS.Trt_vs_MS.NoTrt_B |
| SLC30A4  | 0.0632  | 0.42098 | 0.756 | 0.87 | 1 MS.Trt_vs_MS.NoTrt_B |
| RNASEH1  | 0.06353 | -0.3218 | 0.645 | 0.74 | 1 MS.Trt_vs_MS.NoTrt_B |
| GTF3C4   | 0.06376 | 0.65452 | 0.266 | 0.35 | 1 MS.Trt_vs_MS.NoTrt_B |
| HDAC10   | 0.06393 | 0.32217 | 0.087 | 0.14 | 1 MS.Trt_vs_MS.NoTrt_B |

|           |         |         |       |      |   |                      |
|-----------|---------|---------|-------|------|---|----------------------|
| RAB11FIP3 | 0.06395 | 0.25224 | 0.115 | 0.17 | 1 | MS.Trt_vs_MS.NoTrt_B |
| SFR1      | 0.06407 | 0.43289 | 0.2   | 0.27 | 1 | MS.Trt_vs_MS.NoTrt_B |
| TAF1B     | 0.06427 | 0.61074 | 0.381 | 0.49 | 1 | MS.Trt_vs_MS.NoTrt_B |
| JAK2      | 0.0643  | 0.47221 | 0.159 | 0.22 | 1 | MS.Trt_vs_MS.NoTrt_B |
| MRE11A    | 0.0643  | 0.64651 | 0.603 | 0.7  | 1 | MS.Trt_vs_MS.NoTrt_B |
| FCRL3     | 0.06432 | 0.90012 | 0.316 | 0.25 | 1 | MS.Trt_vs_MS.NoTrt_B |
| ABCC10    | 0.06469 | -0.4386 | 0.813 | 0.95 | 1 | MS.Trt_vs_MS.NoTrt_B |
| PPM1B     | 0.06509 | -0.265  | 0.301 | 0.38 | 1 | MS.Trt_vs_MS.NoTrt_B |
| AGO2      | 0.06512 | 0.43706 | 0.292 | 0.37 | 1 | MS.Trt_vs_MS.NoTrt_B |
| IRAK1BP1  | 0.06539 | 0.34407 | 0.529 | 0.67 | 1 | MS.Trt_vs_MS.NoTrt_B |
| TTC5      | 0.06559 | -0.6593 | 0.412 | 0.48 | 1 | MS.Trt_vs_MS.NoTrt_B |
| TGIF1     | 0.06584 | 0.28367 | 0.161 | 0.23 | 1 | MS.Trt_vs_MS.NoTrt_B |
| HYDIN     | 0.06607 | 0.93415 | 0.179 | 0.24 | 1 | MS.Trt_vs_MS.NoTrt_B |
| BNC2      | 0.06608 | 0.56094 | 0.094 | 0.15 | 1 | MS.Trt_vs_MS.NoTrt_B |
| CHKB      | 0.06624 | 0.41646 | 0.187 | 0.25 | 1 | MS.Trt_vs_MS.NoTrt_B |
| SAMHD1    | 0.06655 | -0.2733 | 0.113 | 0.16 | 1 | MS.Trt_vs_MS.NoTrt_B |
| TMEM45B   | 0.06663 | -0.2941 | 0.481 | 0.57 | 1 | MS.Trt_vs_MS.NoTrt_B |
| C5        | 0.06675 | -0.9702 | 0.322 | 0.39 | 1 | MS.Trt_vs_MS.NoTrt_B |
| ZNF320    | 0.06684 | -0.3162 | 0.917 | 0.97 | 1 | MS.Trt_vs_MS.NoTrt_B |
| BCAP29    | 0.06691 | -0.384  | 0.253 | 0.34 | 1 | MS.Trt_vs_MS.NoTrt_B |
| KEAP1     | 0.06713 | -0.3803 | 0.353 | 0.43 | 1 | MS.Trt_vs_MS.NoTrt_B |
| KIAA0556  | 0.06751 | -0.332  | 0.244 | 0.31 | 1 | MS.Trt_vs_MS.NoTrt_B |
| CHD8      | 0.0677  | 0.3049  | 0.242 | 0.31 | 1 | MS.Trt_vs_MS.NoTrt_B |
| ELK1      | 0.0678  | -0.9406 | 0.068 | 0.11 | 1 | MS.Trt_vs_MS.NoTrt_B |
| MDN1      | 0.06801 | 0.33469 | 0.176 | 0.24 | 1 | MS.Trt_vs_MS.NoTrt_B |
| HYLS1     | 0.06805 | -0.251  | 0.281 | 0.37 | 1 | MS.Trt_vs_MS.NoTrt_B |
| JARID2    | 0.06806 | 0.29669 | 0.157 | 0.22 | 1 | MS.Trt_vs_MS.NoTrt_B |
| LAMB1     | 0.06809 | 0.74055 | 0.198 | 0.27 | 1 | MS.Trt_vs_MS.NoTrt_B |
| PPIG      | 0.06861 | 0.43397 | 0.251 | 0.34 | 1 | MS.Trt_vs_MS.NoTrt_B |
| RCC2      | 0.06882 | 0.30898 | 0.061 | 0.1  | 1 | MS.Trt_vs_MS.NoTrt_B |
| RC3H2     | 0.06888 | 0.61165 | 0.41  | 0.5  | 1 | MS.Trt_vs_MS.NoTrt_B |
| RNF145    | 0.06894 | 0.81813 | 0.102 | 0.16 | 1 | MS.Trt_vs_MS.NoTrt_B |
| IQSEC1    | 0.06906 | 1.19525 | 0.146 | 0.21 | 1 | MS.Trt_vs_MS.NoTrt_B |
| USP3      | 0.06936 | 0.39944 | 0.669 | 0.74 | 1 | MS.Trt_vs_MS.NoTrt_B |
| CEP97     | 0.06941 | 0.52152 | 0.538 | 0.65 | 1 | MS.Trt_vs_MS.NoTrt_B |
| CLIP4     | 0.06983 | -0.3796 | 0.085 | 0.13 | 1 | MS.Trt_vs_MS.NoTrt_B |
| BAZ1A     | 0.07007 | 0.54647 | 0.259 | 0.34 | 1 | MS.Trt_vs_MS.NoTrt_B |
| ZNF23     | 0.0702  | 0.35016 | 0.259 | 0.35 | 1 | MS.Trt_vs_MS.NoTrt_B |
| SLC27A5   | 0.0703  | 0.27081 | 0.776 | 0.89 | 1 | MS.Trt_vs_MS.NoTrt_B |
| ZNF737    | 0.07046 | 0.29939 | 0.702 | 0.82 | 1 | MS.Trt_vs_MS.NoTrt_B |

|            |         |         |       |      |                        |
|------------|---------|---------|-------|------|------------------------|
| ITCH       | 0.07047 | 0.73385 | 0.414 | 0.5  | 1 MS.Trt_vs_MS.NoTrt_B |
| DENND3     | 0.07049 | 0.31338 | 0.351 | 0.45 | 1 MS.Trt_vs_MS.NoTrt_B |
| MIOS       | 0.07073 | 0.52812 | 0.251 | 0.32 | 1 MS.Trt_vs_MS.NoTrt_B |
| DVL2       | 0.07074 | -0.3176 | 0.338 | 0.41 | 1 MS.Trt_vs_MS.NoTrt_B |
| TGFB1      | 0.07091 | 0.63941 | 0.2   | 0.27 | 1 MS.Trt_vs_MS.NoTrt_B |
| ZNF146     | 0.07094 | 0.29831 | 0.15  | 0.21 | 1 MS.Trt_vs_MS.NoTrt_B |
| ORC3       | 0.07109 | -0.2793 | 0.098 | 0.15 | 1 MS.Trt_vs_MS.NoTrt_B |
| AP2A1      | 0.0712  | -1.004  | 0.63  | 0.76 | 1 MS.Trt_vs_MS.NoTrt_B |
| MALL       | 0.07125 | 0.28578 | 0.508 | 0.65 | 1 MS.Trt_vs_MS.NoTrt_B |
| HNRNPUL1   | 0.07126 | 0.25234 | 0.575 | 0.68 | 1 MS.Trt_vs_MS.NoTrt_B |
| TGFBRAP1   | 0.07135 | -0.4145 | 0.355 | 0.44 | 1 MS.Trt_vs_MS.NoTrt_B |
| CD59       | 0.0714  | -0.4659 | 0.577 | 0.7  | 1 MS.Trt_vs_MS.NoTrt_B |
| CNIH3      | 0.07148 | -0.9564 | 0.122 | 0.17 | 1 MS.Trt_vs_MS.NoTrt_B |
| WDR59      | 0.07174 | 0.6017  | 0.854 | 0.94 | 1 MS.Trt_vs_MS.NoTrt_B |
| GK         | 0.07202 | 0.54204 | 0.133 | 0.19 | 1 MS.Trt_vs_MS.NoTrt_B |
| KLHL3      | 0.07234 | 0.46329 | 0.187 | 0.25 | 1 MS.Trt_vs_MS.NoTrt_B |
| NAV2       | 0.07244 | 0.7691  | 0.379 | 0.32 | 1 MS.Trt_vs_MS.NoTrt_B |
| SPHK2      | 0.07283 | -0.2526 | 0.222 | 0.29 | 1 MS.Trt_vs_MS.NoTrt_B |
| AL354822.1 | 0.07286 | 0.47479 | 0.155 | 0.21 | 1 MS.Trt_vs_MS.NoTrt_B |
| PI4KA      | 0.07298 | 0.58146 | 0.203 | 0.27 | 1 MS.Trt_vs_MS.NoTrt_B |
| PLIN2      | 0.07305 | -0.2631 | 0.553 | 0.63 | 1 MS.Trt_vs_MS.NoTrt_B |
| TIMM21     | 0.07331 | 0.38225 | 0.542 | 0.63 | 1 MS.Trt_vs_MS.NoTrt_B |
| LAX1       | 0.07338 | -1.0141 | 0.381 | 0.42 | 1 MS.Trt_vs_MS.NoTrt_B |
| UNC45B     | 0.07345 | -0.4804 | 0.072 | 0.11 | 1 MS.Trt_vs_MS.NoTrt_B |
| DALRD3     | 0.0737  | -0.3448 | 0.089 | 0.14 | 1 MS.Trt_vs_MS.NoTrt_B |
| GLB1L3     | 0.07384 | 0.26265 | 0.586 | 0.69 | 1 MS.Trt_vs_MS.NoTrt_B |
| SCARB2     | 0.07385 | 0.40264 | 0.209 | 0.29 | 1 MS.Trt_vs_MS.NoTrt_B |
| FIBP       | 0.07394 | -0.4105 | 0.449 | 0.51 | 1 MS.Trt_vs_MS.NoTrt_B |
| ZCWPW2     | 0.07408 | 0.40255 | 0.375 | 0.48 | 1 MS.Trt_vs_MS.NoTrt_B |
| MAEA       | 0.07433 | 0.28114 | 0.51  | 0.61 | 1 MS.Trt_vs_MS.NoTrt_B |
| GLT8D1     | 0.07437 | -0.332  | 0.185 | 0.24 | 1 MS.Trt_vs_MS.NoTrt_B |
| ZNF398     | 0.07466 | -0.6623 | 0.083 | 0.13 | 1 MS.Trt_vs_MS.NoTrt_B |
| AKIRIN1    | 0.07473 | 0.3103  | 0.41  | 0.49 | 1 MS.Trt_vs_MS.NoTrt_B |
| ZNF525     | 0.07483 | 1.39833 | 0.447 | 0.54 | 1 MS.Trt_vs_MS.NoTrt_B |
| OGFOD3     | 0.07487 | -1.1044 | 0.447 | 0.52 | 1 MS.Trt_vs_MS.NoTrt_B |
| RFC5       | 0.07519 | -0.5822 | 0.089 | 0.14 | 1 MS.Trt_vs_MS.NoTrt_B |
| ZNF766     | 0.07526 | 0.36087 | 0.946 | 1    | 1 MS.Trt_vs_MS.NoTrt_B |
| YY1        | 0.0753  | 0.56615 | 0.251 | 0.32 | 1 MS.Trt_vs_MS.NoTrt_B |
| FAF1       | 0.07547 | 0.53617 | 0.383 | 0.47 | 1 MS.Trt_vs_MS.NoTrt_B |
| MYO1D      | 0.0755  | 0.89519 | 0.109 | 0.16 | 1 MS.Trt_vs_MS.NoTrt_B |

|            |         |         |       |      |                        |
|------------|---------|---------|-------|------|------------------------|
| UBXN2B     | 0.07565 | 0.35625 | 0.285 | 0.36 | 1 MS.Trt_vs_MS.NoTrt_B |
| DPF2       | 0.07593 | 0.34676 | 0.76  | 0.87 | 1 MS.Trt_vs_MS.NoTrt_B |
| CCDC50     | 0.07616 | 1.09831 | 0.331 | 0.42 | 1 MS.Trt_vs_MS.NoTrt_B |
| ANKRD52    | 0.07619 | -0.3321 | 0.113 | 0.16 | 1 MS.Trt_vs_MS.NoTrt_B |
| RALBP1     | 0.07625 | 0.27847 | 0.29  | 0.36 | 1 MS.Trt_vs_MS.NoTrt_B |
| NPIP11     | 0.07638 | 0.89912 | 0.359 | 0.49 | 1 MS.Trt_vs_MS.NoTrt_B |
| THOP1      | 0.07641 | -0.2801 | 0.312 | 0.41 | 1 MS.Trt_vs_MS.NoTrt_B |
| FBXO34     | 0.07662 | -0.6324 | 0.063 | 0.1  | 1 MS.Trt_vs_MS.NoTrt_B |
| ABCD4      | 0.07664 | 0.53797 | 0.669 | 0.79 | 1 MS.Trt_vs_MS.NoTrt_B |
| SUZ12      | 0.07667 | 0.37719 | 0.527 | 0.61 | 1 MS.Trt_vs_MS.NoTrt_B |
| TLN1       | 0.0767  | 0.49119 | 0.481 | 0.57 | 1 MS.Trt_vs_MS.NoTrt_B |
| UBE2H      | 0.07703 | 0.59218 | 0.105 | 0.16 | 1 MS.Trt_vs_MS.NoTrt_B |
| DCBLD1     | 0.07703 | 1.19389 | 0.405 | 0.52 | 1 MS.Trt_vs_MS.NoTrt_B |
| WDR46      | 0.07729 | 0.48318 | 0.083 | 0.13 | 1 MS.Trt_vs_MS.NoTrt_B |
| CCDC18     | 0.07752 | 0.47048 | 0.133 | 0.19 | 1 MS.Trt_vs_MS.NoTrt_B |
| ZBTB16     | 0.07763 | 1.17708 | 0.298 | 0.4  | 1 MS.Trt_vs_MS.NoTrt_B |
| RP11-347C1 | 0.07764 | 0.44555 | 0.527 | 0.7  | 1 MS.Trt_vs_MS.NoTrt_B |
| MED19      | 0.07765 | 0.42951 | 0.07  | 0.11 | 1 MS.Trt_vs_MS.NoTrt_B |
| UFL1       | 0.07767 | 0.60029 | 0.135 | 0.19 | 1 MS.Trt_vs_MS.NoTrt_B |
| NUP43      | 0.07812 | 0.58664 | 0.717 | 0.8  | 1 MS.Trt_vs_MS.NoTrt_B |
| MTMR10     | 0.07831 | 0.66674 | 0.12  | 0.18 | 1 MS.Trt_vs_MS.NoTrt_B |
| TRAT1      | 0.07842 | 1.30075 | 0.224 | 0.17 | 1 MS.Trt_vs_MS.NoTrt_B |
| UHMK1      | 0.07847 | 0.2773  | 0.187 | 0.25 | 1 MS.Trt_vs_MS.NoTrt_B |
| TTC33      | 0.07857 | 0.69633 | 0.163 | 0.22 | 1 MS.Trt_vs_MS.NoTrt_B |
| SHQ1       | 0.07862 | 1.01003 | 0.575 | 0.67 | 1 MS.Trt_vs_MS.NoTrt_B |
| SUN1       | 0.07867 | 0.60071 | 0.516 | 0.61 | 1 MS.Trt_vs_MS.NoTrt_B |
| RRAGD      | 0.07867 | 0.37586 | 0.113 | 0.17 | 1 MS.Trt_vs_MS.NoTrt_B |
| CCHCR1     | 0.07878 | -0.4248 | 0.29  | 0.36 | 1 MS.Trt_vs_MS.NoTrt_B |
| CASC10     | 0.07891 | 0.4845  | 0.301 | 0.37 | 1 MS.Trt_vs_MS.NoTrt_B |
| CLTC       | 0.07916 | -0.3325 | 0.294 | 0.35 | 1 MS.Trt_vs_MS.NoTrt_B |
| NR1D1      | 0.07938 | -0.3322 | 0.072 | 0.11 | 1 MS.Trt_vs_MS.NoTrt_B |
| ECSIT      | 0.07979 | 0.4468  | 0.346 | 0.42 | 1 MS.Trt_vs_MS.NoTrt_B |
| IL1R1      | 0.07985 | -0.4426 | 0.218 | 0.29 | 1 MS.Trt_vs_MS.NoTrt_B |
| GLUL       | 0.08005 | 0.84668 | 0.124 | 0.18 | 1 MS.Trt_vs_MS.NoTrt_B |
| TIAF1      | 0.08006 | -0.6404 | 0.423 | 0.49 | 1 MS.Trt_vs_MS.NoTrt_B |
| TTC21B     | 0.0802  | -0.5948 | 0.264 | 0.35 | 1 MS.Trt_vs_MS.NoTrt_B |
| CDK2AP2    | 0.08022 | 0.42925 | 0.155 | 0.22 | 1 MS.Trt_vs_MS.NoTrt_B |
| ENY2       | 0.08028 | 1.06341 | 0.484 | 0.59 | 1 MS.Trt_vs_MS.NoTrt_B |
| MAPRE2     | 0.08049 | 0.26966 | 0.205 | 0.27 | 1 MS.Trt_vs_MS.NoTrt_B |
| NIPA1      | 0.08054 | -0.8491 | 0.122 | 0.17 | 1 MS.Trt_vs_MS.NoTrt_B |

|          |         |         |       |      |                        |
|----------|---------|---------|-------|------|------------------------|
| MT-ND5   | 0.08084 | 0.47071 | 0.854 | 0.89 | 1 MS.Trt_vs_MS.NoTrt_B |
| RPA3     | 0.08088 | 0.33745 | 0.157 | 0.21 | 1 MS.Trt_vs_MS.NoTrt_B |
| FBXL22   | 0.08097 | 0.47667 | 0.063 | 0.1  | 1 MS.Trt_vs_MS.NoTrt_B |
| C1orf186 | 0.08115 | 0.30756 | 0.431 | 0.57 | 1 MS.Trt_vs_MS.NoTrt_B |
| CAD      | 0.08122 | 0.2783  | 0.58  | 0.7  | 1 MS.Trt_vs_MS.NoTrt_B |
| MOCS2    | 0.08144 | 0.29608 | 0.063 | 0.1  | 1 MS.Trt_vs_MS.NoTrt_B |
| KPNA5    | 0.0815  | 0.28597 | 0.9   | 0.98 | 1 MS.Trt_vs_MS.NoTrt_B |
| TAS2R4   | 0.08155 | -0.3729 | 0.257 | 0.34 | 1 MS.Trt_vs_MS.NoTrt_B |
| MAP3K7   | 0.08177 | 0.26344 | 0.115 | 0.17 | 1 MS.Trt_vs_MS.NoTrt_B |
| CCNK     | 0.0819  | 0.33787 | 0.218 | 0.29 | 1 MS.Trt_vs_MS.NoTrt_B |
| ZMIZ2    | 0.08213 | 0.47798 | 0.111 | 0.16 | 1 MS.Trt_vs_MS.NoTrt_B |
| C16orf54 | 0.08232 | 1.04193 | 0.73  | 0.84 | 1 MS.Trt_vs_MS.NoTrt_B |
| FAM184B  | 0.08249 | 0.45293 | 0.094 | 0.14 | 1 MS.Trt_vs_MS.NoTrt_B |
| RBM22    | 0.08275 | 0.42638 | 0.105 | 0.16 | 1 MS.Trt_vs_MS.NoTrt_B |
| SRPRA    | 0.08283 | 0.2827  | 0.214 | 0.29 | 1 MS.Trt_vs_MS.NoTrt_B |
| TPGS1    | 0.08289 | 0.82173 | 0.288 | 0.22 | 1 MS.Trt_vs_MS.NoTrt_B |
| TMEM205  | 0.08289 | -0.3072 | 0.063 | 0.1  | 1 MS.Trt_vs_MS.NoTrt_B |
| ALDH3A2  | 0.08291 | -0.7368 | 0.224 | 0.29 | 1 MS.Trt_vs_MS.NoTrt_B |
| RCBTB2   | 0.08293 | 0.29259 | 0.1   | 0.15 | 1 MS.Trt_vs_MS.NoTrt_B |
| IKZF5    | 0.08297 | 0.92293 | 0.181 | 0.25 | 1 MS.Trt_vs_MS.NoTrt_B |
| GHRL     | 0.08301 | 0.72694 | 0.061 | 0.1  | 1 MS.Trt_vs_MS.NoTrt_B |
| THAP5    | 0.08309 | 0.96622 | 0.804 | 0.89 | 1 MS.Trt_vs_MS.NoTrt_B |
| R3HCC1L  | 0.08316 | -0.2679 | 0.211 | 0.28 | 1 MS.Trt_vs_MS.NoTrt_B |
| AHRR     | 0.08327 | 0.98368 | 0.081 | 0.13 | 1 MS.Trt_vs_MS.NoTrt_B |
| MTHFD1L  | 0.0834  | 1.45321 | 0.065 | 0.11 | 1 MS.Trt_vs_MS.NoTrt_B |
| KBTBD2   | 0.08369 | 0.3744  | 0.51  | 0.6  | 1 MS.Trt_vs_MS.NoTrt_B |
| ZSCAN32  | 0.08384 | 0.45649 | 0.172 | 0.24 | 1 MS.Trt_vs_MS.NoTrt_B |
| EIF1B    | 0.08397 | 0.4565  | 0.137 | 0.2  | 1 MS.Trt_vs_MS.NoTrt_B |
| NAA35    | 0.0841  | -0.3661 | 0.27  | 0.34 | 1 MS.Trt_vs_MS.NoTrt_B |
| SMG6     | 0.08418 | -0.4043 | 0.148 | 0.2  | 1 MS.Trt_vs_MS.NoTrt_B |
| FASTKD2  | 0.08422 | 0.43962 | 0.464 | 0.57 | 1 MS.Trt_vs_MS.NoTrt_B |
| USP6     | 0.08437 | 0.28323 | 0.1   | 0.15 | 1 MS.Trt_vs_MS.NoTrt_B |
| FKBP9    | 0.0844  | 1.06262 | 0.344 | 0.44 | 1 MS.Trt_vs_MS.NoTrt_B |
| KIFAP3   | 0.08452 | -0.9041 | 0.115 | 0.16 | 1 MS.Trt_vs_MS.NoTrt_B |
| CR1      | 0.08461 | 0.48167 | 0.444 | 0.55 | 1 MS.Trt_vs_MS.NoTrt_B |
| ABCG1    | 0.0848  | -0.4204 | 0.375 | 0.47 | 1 MS.Trt_vs_MS.NoTrt_B |
| ZNF487   | 0.08489 | -0.8247 | 0.351 | 0.43 | 1 MS.Trt_vs_MS.NoTrt_B |
| BACE2    | 0.08523 | 0.27514 | 0.172 | 0.23 | 1 MS.Trt_vs_MS.NoTrt_B |
| FNIP1    | 0.08524 | 0.83056 | 0.46  | 0.55 | 1 MS.Trt_vs_MS.NoTrt_B |
| ZNF221   | 0.08527 | -0.2642 | 0.187 | 0.26 | 1 MS.Trt_vs_MS.NoTrt_B |

|          |         |         |       |      |                        |
|----------|---------|---------|-------|------|------------------------|
| C6orf106 | 0.08527 | 0.3127  | 0.089 | 0.14 | 1 MS.Trt_vs_MS.NoTrt_B |
| ZNF526   | 0.08542 | 0.47412 | 0.373 | 0.48 | 1 MS.Trt_vs_MS.NoTrt_B |
| EPHX1    | 0.08549 | 0.4067  | 0.074 | 0.12 | 1 MS.Trt_vs_MS.NoTrt_B |
| SELK     | 0.0855  | 0.47752 | 0.325 | 0.38 | 1 MS.Trt_vs_MS.NoTrt_B |
| STXBP4   | 0.08572 | -0.707  | 0.377 | 0.47 | 1 MS.Trt_vs_MS.NoTrt_B |
| DZIP3    | 0.08614 | 1.44253 | 0.174 | 0.24 | 1 MS.Trt_vs_MS.NoTrt_B |
| FAM96A   | 0.08632 | 0.48634 | 0.298 | 0.38 | 1 MS.Trt_vs_MS.NoTrt_B |
| INTU     | 0.08646 | 0.37414 | 0.922 | 0.97 | 1 MS.Trt_vs_MS.NoTrt_B |
| PRKCI    | 0.08661 | -0.3784 | 0.224 | 0.3  | 1 MS.Trt_vs_MS.NoTrt_B |
| EIF4G2   | 0.0867  | 0.27376 | 0.479 | 0.56 | 1 MS.Trt_vs_MS.NoTrt_B |
| ZNF83    | 0.08679 | 0.56892 | 0.747 | 0.83 | 1 MS.Trt_vs_MS.NoTrt_B |
| SLC15A4  | 0.08717 | -0.4739 | 0.654 | 0.73 | 1 MS.Trt_vs_MS.NoTrt_B |
| CBFA2T2  | 0.08736 | 0.4393  | 0.843 | 0.95 | 1 MS.Trt_vs_MS.NoTrt_B |
| SAXO2    | 0.08755 | 0.55764 | 0.148 | 0.21 | 1 MS.Trt_vs_MS.NoTrt_B |
| CUL9     | 0.08777 | 0.55748 | 0.12  | 0.17 | 1 MS.Trt_vs_MS.NoTrt_B |
| DHX35    | 0.08801 | 0.26358 | 0.325 | 0.4  | 1 MS.Trt_vs_MS.NoTrt_B |
| PDE7A    | 0.08817 | 0.59987 | 0.244 | 0.32 | 1 MS.Trt_vs_MS.NoTrt_B |
| POLN     | 0.08824 | 0.32681 | 0.514 | 0.6  | 1 MS.Trt_vs_MS.NoTrt_B |
| SRFBP1   | 0.08836 | 0.57243 | 0.32  | 0.4  | 1 MS.Trt_vs_MS.NoTrt_B |
| UNC50    | 0.08841 | 0.41465 | 0.081 | 0.12 | 1 MS.Trt_vs_MS.NoTrt_B |
| TMEM231  | 0.08849 | -0.4103 | 0.58  | 0.71 | 1 MS.Trt_vs_MS.NoTrt_B |
| ZCCHC11  | 0.08853 | 0.40332 | 0.852 | 0.9  | 1 MS.Trt_vs_MS.NoTrt_B |
| TAF1A    | 0.08866 | -0.7296 | 0.309 | 0.39 | 1 MS.Trt_vs_MS.NoTrt_B |
| HMGXB3   | 0.08868 | -0.4583 | 0.109 | 0.16 | 1 MS.Trt_vs_MS.NoTrt_B |
| B3GNT2   | 0.08872 | 0.28651 | 0.085 | 0.13 | 1 MS.Trt_vs_MS.NoTrt_B |
| ZNF432   | 0.08877 | -0.5328 | 0.479 | 0.6  | 1 MS.Trt_vs_MS.NoTrt_B |
| SYPL1    | 0.08889 | 0.52384 | 0.316 | 0.39 | 1 MS.Trt_vs_MS.NoTrt_B |
| PSMC2    | 0.08899 | 0.3604  | 0.168 | 0.23 | 1 MS.Trt_vs_MS.NoTrt_B |
| ZNF552   | 0.08904 | 0.25706 | 0.325 | 0.42 | 1 MS.Trt_vs_MS.NoTrt_B |
| BDH2     | 0.08923 | -0.6362 | 0.139 | 0.19 | 1 MS.Trt_vs_MS.NoTrt_B |
| LRRK1    | 0.08924 | 0.40722 | 0.688 | 0.81 | 1 MS.Trt_vs_MS.NoTrt_B |
| PPP2R2D  | 0.08936 | 1.45332 | 0.529 | 0.64 | 1 MS.Trt_vs_MS.NoTrt_B |
| XYLB     | 0.08937 | 0.35108 | 0.366 | 0.45 | 1 MS.Trt_vs_MS.NoTrt_B |
| ADAP2    | 0.08961 | 0.52128 | 0.107 | 0.16 | 1 MS.Trt_vs_MS.NoTrt_B |
| PSENE1   | 0.08993 | -0.5281 | 0.118 | 0.16 | 1 MS.Trt_vs_MS.NoTrt_B |
| YTHDC2   | 0.09022 | 0.68683 | 0.303 | 0.39 | 1 MS.Trt_vs_MS.NoTrt_B |
| NKIRAS1  | 0.09061 | -0.8092 | 0.198 | 0.25 | 1 MS.Trt_vs_MS.NoTrt_B |
| PPP1CB   | 0.09072 | 1.18465 | 0.719 | 0.78 | 1 MS.Trt_vs_MS.NoTrt_B |
| LRRRC3   | 0.09078 | 0.31411 | 0.092 | 0.14 | 1 MS.Trt_vs_MS.NoTrt_B |
| C7orf50  | 0.09085 | 0.26611 | 0.294 | 0.36 | 1 MS.Trt_vs_MS.NoTrt_B |



|             |         |         |       |      |                        |
|-------------|---------|---------|-------|------|------------------------|
| FAM234B     | 0.09095 | -0.888  | 0.325 | 0.38 | 1 MS.Trt_vs_MS.NoTrt_B |
| PRKAG1      | 0.09108 | -0.5251 | 0.468 | 0.55 | 1 MS.Trt_vs_MS.NoTrt_B |
| ABCE1       | 0.09128 | 0.44838 | 0.261 | 0.33 | 1 MS.Trt_vs_MS.NoTrt_B |
| OSMR        | 0.09135 | 0.97417 | 0.497 | 0.46 | 1 MS.Trt_vs_MS.NoTrt_B |
| S1PR1       | 0.09138 | 0.44903 | 0.479 | 0.62 | 1 MS.Trt_vs_MS.NoTrt_B |
| APPBP2      | 0.0918  | -0.4063 | 0.763 | 0.83 | 1 MS.Trt_vs_MS.NoTrt_B |
| HELQ        | 0.0919  | -0.3296 | 0.1   | 0.15 | 1 MS.Trt_vs_MS.NoTrt_B |
| TMOD2       | 0.092   | 0.30035 | 0.359 | 0.47 | 1 MS.Trt_vs_MS.NoTrt_B |
| TRAF6       | 0.09215 | 0.29474 | 0.556 | 0.65 | 1 MS.Trt_vs_MS.NoTrt_B |
| POLH        | 0.09218 | 0.71087 | 0.438 | 0.54 | 1 MS.Trt_vs_MS.NoTrt_B |
| CH507-9B2.! | 0.09242 | 0.34685 | 0.072 | 0.11 | 1 MS.Trt_vs_MS.NoTrt_B |
| ADCY9       | 0.0925  | 1.02819 | 0.207 | 0.28 | 1 MS.Trt_vs_MS.NoTrt_B |
| AURKB       | 0.09261 | -0.3838 | 0.301 | 0.38 | 1 MS.Trt_vs_MS.NoTrt_B |
| ATP6V0A1    | 0.09267 | -0.8095 | 0.734 | 0.81 | 1 MS.Trt_vs_MS.NoTrt_B |
| SLC35G2     | 0.09271 | 1.13489 | 0.105 | 0.15 | 1 MS.Trt_vs_MS.NoTrt_B |
| EFHB        | 0.09295 | 0.2976  | 0.246 | 0.31 | 1 MS.Trt_vs_MS.NoTrt_B |
| PITRM1      | 0.09333 | -0.3099 | 0.131 | 0.18 | 1 MS.Trt_vs_MS.NoTrt_B |
| FGF22       | 0.09339 | 0.46687 | 0.351 | 0.29 | 1 MS.Trt_vs_MS.NoTrt_B |
| JUND        | 0.09348 | 0.29596 | 0.085 | 0.13 | 1 MS.Trt_vs_MS.NoTrt_B |
| APOBEC3C    | 0.0935  | 0.30199 | 0.612 | 0.74 | 1 MS.Trt_vs_MS.NoTrt_B |
| MAP1LC3C    | 0.09364 | 0.63368 | 0.394 | 0.36 | 1 MS.Trt_vs_MS.NoTrt_B |
| HCFC1       | 0.09376 | 0.35541 | 0.22  | 0.29 | 1 MS.Trt_vs_MS.NoTrt_B |
| SPINK9      | 0.09383 | 0.40871 | 0.558 | 0.75 | 1 MS.Trt_vs_MS.NoTrt_B |
| TDRD12      | 0.09384 | 1.10035 | 0.479 | 0.42 | 1 MS.Trt_vs_MS.NoTrt_B |
| WNT2B       | 0.09399 | 0.69149 | 0.329 | 0.41 | 1 MS.Trt_vs_MS.NoTrt_B |
| HUWE1       | 0.09399 | 0.31321 | 0.344 | 0.42 | 1 MS.Trt_vs_MS.NoTrt_B |
| CD200       | 0.09404 | 0.69404 | 0.54  | 0.51 | 1 MS.Trt_vs_MS.NoTrt_B |
| ZNF287      | 0.09419 | -0.7271 | 0.305 | 0.37 | 1 MS.Trt_vs_MS.NoTrt_B |
| PDXK        | 0.09424 | 0.7114  | 0.401 | 0.51 | 1 MS.Trt_vs_MS.NoTrt_B |
| LSM11       | 0.09452 | 0.26243 | 0.479 | 0.55 | 1 MS.Trt_vs_MS.NoTrt_B |
| LRRC40      | 0.09464 | 0.80113 | 0.065 | 0.1  | 1 MS.Trt_vs_MS.NoTrt_B |
| NPM1        | 0.09499 | 0.35436 | 0.584 | 0.76 | 1 MS.Trt_vs_MS.NoTrt_B |
| RBM38       | 0.09549 | 0.35851 | 0.098 | 0.15 | 1 MS.Trt_vs_MS.NoTrt_B |
| EPS8        | 0.09557 | -0.7587 | 0.298 | 0.38 | 1 MS.Trt_vs_MS.NoTrt_B |
| RNF220      | 0.09611 | 0.46622 | 0.525 | 0.65 | 1 MS.Trt_vs_MS.NoTrt_B |
| PIP4K2B     | 0.09614 | 0.85525 | 0.102 | 0.15 | 1 MS.Trt_vs_MS.NoTrt_B |
| AC138969.4  | 0.09617 | 0.67294 | 0.373 | 0.47 | 1 MS.Trt_vs_MS.NoTrt_B |
| PECAM1      | 0.09625 | 1.01719 | 0.641 | 0.74 | 1 MS.Trt_vs_MS.NoTrt_B |
| VIPR2       | 0.0964  | 0.30288 | 0.253 | 0.2  | 1 MS.Trt_vs_MS.NoTrt_B |
| NREP        | 0.09647 | 0.5247  | 0.109 | 0.16 | 1 MS.Trt_vs_MS.NoTrt_B |

|             |         |         |       |      |                        |
|-------------|---------|---------|-------|------|------------------------|
| PFKP        | 0.0967  | -0.4049 | 0.22  | 0.27 | 1 MS.Trt_vs_MS.NoTrt_B |
| YES1        | 0.09681 | 0.55058 | 0.294 | 0.37 | 1 MS.Trt_vs_MS.NoTrt_B |
| KNG1        | 0.09695 | 0.90633 | 0.144 | 0.21 | 1 MS.Trt_vs_MS.NoTrt_B |
| ZNF354A     | 0.097   | 0.50234 | 0.135 | 0.19 | 1 MS.Trt_vs_MS.NoTrt_B |
| XPO1        | 0.09739 | 0.54093 | 0.869 | 0.93 | 1 MS.Trt_vs_MS.NoTrt_B |
| MUM1        | 0.09774 | -0.5891 | 0.484 | 0.58 | 1 MS.Trt_vs_MS.NoTrt_B |
| NAPG        | 0.09786 | 0.37294 | 0.475 | 0.58 | 1 MS.Trt_vs_MS.NoTrt_B |
| ACSL6       | 0.09793 | 0.60491 | 0.549 | 0.49 | 1 MS.Trt_vs_MS.NoTrt_B |
| WDPCP       | 0.09822 | 0.48919 | 0.871 | 0.98 | 1 MS.Trt_vs_MS.NoTrt_B |
| PGAP1       | 0.09828 | 0.2626  | 0.279 | 0.35 | 1 MS.Trt_vs_MS.NoTrt_B |
| LYST        | 0.09849 | 1.18639 | 0.222 | 0.3  | 1 MS.Trt_vs_MS.NoTrt_B |
| ABCA5       | 0.09853 | 0.41072 | 0.547 | 0.68 | 1 MS.Trt_vs_MS.NoTrt_B |
| VAV3        | 0.09855 | 1.07488 | 0.492 | 0.43 | 1 MS.Trt_vs_MS.NoTrt_B |
| CTD-2192J10 | 0.09892 | 1.86799 | 0.168 | 0.12 | 1 MS.Trt_vs_MS.NoTrt_B |
| INPP5F      | 0.09894 | 0.59353 | 0.248 | 0.32 | 1 MS.Trt_vs_MS.NoTrt_B |
| PLGRKT      | 0.09897 | -0.9491 | 0.074 | 0.11 | 1 MS.Trt_vs_MS.NoTrt_B |
| PADI4       | 0.09914 | 0.49364 | 0.388 | 0.49 | 1 MS.Trt_vs_MS.NoTrt_B |
| NFASC       | 0.09919 | 0.76865 | 0.479 | 0.59 | 1 MS.Trt_vs_MS.NoTrt_B |
| PAK1        | 0.09974 | -0.8122 | 0.12  | 0.17 | 1 MS.Trt_vs_MS.NoTrt_B |
| TMEM97      | 0.09976 | -0.4377 | 0.185 | 0.25 | 1 MS.Trt_vs_MS.NoTrt_B |
| CD96        | 0.09982 | 0.63478 | 0.514 | 0.6  | 1 MS.Trt_vs_MS.NoTrt_B |
| TTF1        | 0.10011 | -0.3066 | 0.359 | 0.42 | 1 MS.Trt_vs_MS.NoTrt_B |
| TMEM30A     | 0.1002  | 0.31473 | 0.153 | 0.21 | 1 MS.Trt_vs_MS.NoTrt_B |
| TTC8        | 0.10028 | -0.2587 | 0.56  | 0.69 | 1 MS.Trt_vs_MS.NoTrt_B |
| CCDC62      | 0.10028 | 0.32851 | 0.349 | 0.45 | 1 MS.Trt_vs_MS.NoTrt_B |
| POLR2H      | 0.10029 | 0.41053 | 0.401 | 0.48 | 1 MS.Trt_vs_MS.NoTrt_B |
| PLD2        | 0.10045 | -0.6756 | 0.065 | 0.1  | 1 MS.Trt_vs_MS.NoTrt_B |
| GIN51       | 0.10049 | 0.3095  | 0.436 | 0.57 | 1 MS.Trt_vs_MS.NoTrt_B |
| ETFBKMT     | 0.10054 | 0.27035 | 0.54  | 0.64 | 1 MS.Trt_vs_MS.NoTrt_B |
| LGALS3BP    | 0.10058 | -0.3    | 0.418 | 0.54 | 1 MS.Trt_vs_MS.NoTrt_B |
| ZNF69       | 0.10077 | -0.618  | 0.368 | 0.43 | 1 MS.Trt_vs_MS.NoTrt_B |
| NFS1        | 0.10092 | -0.9751 | 0.776 | 0.87 | 1 MS.Trt_vs_MS.NoTrt_B |
| VIL1        | 0.10103 | 0.36873 | 0.122 | 0.17 | 1 MS.Trt_vs_MS.NoTrt_B |
| BANK1       | 0.10118 | 1.02634 | 0.122 | 0.18 | 1 MS.Trt_vs_MS.NoTrt_B |
| CUL4B       | 0.10146 | 0.65866 | 0.078 | 0.12 | 1 MS.Trt_vs_MS.NoTrt_B |
| LAIR1       | 0.10186 | -1.2099 | 0.773 | 0.83 | 1 MS.Trt_vs_MS.NoTrt_B |
| CENPN       | 0.10198 | 0.5316  | 0.098 | 0.15 | 1 MS.Trt_vs_MS.NoTrt_B |
| TRIP11      | 0.10219 | 0.50532 | 0.431 | 0.5  | 1 MS.Trt_vs_MS.NoTrt_B |
| IGFL2       | 0.10229 | 0.37887 | 0.214 | 0.28 | 1 MS.Trt_vs_MS.NoTrt_B |
| SYNGAP1     | 0.10251 | 0.5353  | 0.102 | 0.15 | 1 MS.Trt_vs_MS.NoTrt_B |

|          |         |         |       |      |                        |
|----------|---------|---------|-------|------|------------------------|
| PATL2    | 0.10292 | 0.54555 | 0.279 | 0.37 | 1 MS.Trt_vs_MS.NoTrt_B |
| F3       | 0.10317 | 0.38322 | 0.392 | 0.52 | 1 MS.Trt_vs_MS.NoTrt_B |
| CCP110   | 0.10326 | -0.7835 | 0.425 | 0.48 | 1 MS.Trt_vs_MS.NoTrt_B |
| FBXO42   | 0.1033  | 0.4197  | 0.394 | 0.49 | 1 MS.Trt_vs_MS.NoTrt_B |
| ZNF573   | 0.10334 | -0.8322 | 0.359 | 0.42 | 1 MS.Trt_vs_MS.NoTrt_B |
| TMEM170B | 0.10372 | 0.29849 | 0.187 | 0.24 | 1 MS.Trt_vs_MS.NoTrt_B |
| OTUD4    | 0.10379 | 0.73917 | 0.556 | 0.63 | 1 MS.Trt_vs_MS.NoTrt_B |
| DNAJC10  | 0.10411 | 0.33575 | 0.88  | 0.96 | 1 MS.Trt_vs_MS.NoTrt_B |
| SNRK     | 0.10415 | 0.33877 | 0.477 | 0.55 | 1 MS.Trt_vs_MS.NoTrt_B |
| CDK19    | 0.10434 | 0.84968 | 0.209 | 0.28 | 1 MS.Trt_vs_MS.NoTrt_B |
| SLC35E4  | 0.1044  | 0.27733 | 0.233 | 0.3  | 1 MS.Trt_vs_MS.NoTrt_B |
| FAM222B  | 0.10445 | 0.36429 | 0.122 | 0.17 | 1 MS.Trt_vs_MS.NoTrt_B |
| NRBF2    | 0.10451 | 0.36991 | 0.07  | 0.11 | 1 MS.Trt_vs_MS.NoTrt_B |
| ZNF664   | 0.10454 | 0.65448 | 0.179 | 0.24 | 1 MS.Trt_vs_MS.NoTrt_B |
| CASC3    | 0.10476 | 0.3984  | 0.423 | 0.52 | 1 MS.Trt_vs_MS.NoTrt_B |
| LAMTOR5  | 0.10485 | 0.37895 | 0.392 | 0.47 | 1 MS.Trt_vs_MS.NoTrt_B |
| AGFG2    | 0.10491 | -0.2644 | 0.268 | 0.34 | 1 MS.Trt_vs_MS.NoTrt_B |
| ST5      | 0.10505 | -0.2878 | 0.251 | 0.34 | 1 MS.Trt_vs_MS.NoTrt_B |
| ZBTB43   | 0.10539 | 0.5946  | 0.678 | 0.62 | 1 MS.Trt_vs_MS.NoTrt_B |
| ABCC5    | 0.10544 | -0.5157 | 0.105 | 0.15 | 1 MS.Trt_vs_MS.NoTrt_B |
| MYH10    | 0.10545 | 0.37297 | 0.074 | 0.11 | 1 MS.Trt_vs_MS.NoTrt_B |
| RAB4B    | 0.10558 | 0.36017 | 0.279 | 0.35 | 1 MS.Trt_vs_MS.NoTrt_B |
| UBB      | 0.10574 | 0.29758 | 0.54  | 0.69 | 1 MS.Trt_vs_MS.NoTrt_B |
| GRWD1    | 0.10574 | -0.497  | 0.383 | 0.44 | 1 MS.Trt_vs_MS.NoTrt_B |
| USP16    | 0.10584 | 0.27487 | 0.407 | 0.46 | 1 MS.Trt_vs_MS.NoTrt_B |
| CDKL1    | 0.10586 | 0.86434 | 0.586 | 0.68 | 1 MS.Trt_vs_MS.NoTrt_B |
| MRPS18B  | 0.10589 | 0.57357 | 0.584 | 0.69 | 1 MS.Trt_vs_MS.NoTrt_B |
| OCLN     | 0.10594 | 0.34046 | 0.63  | 0.77 | 1 MS.Trt_vs_MS.NoTrt_B |
| KIF11    | 0.106   | 0.29879 | 0.316 | 0.4  | 1 MS.Trt_vs_MS.NoTrt_B |
| BCKDHA   | 0.10602 | -0.3814 | 0.148 | 0.2  | 1 MS.Trt_vs_MS.NoTrt_B |
| SPATA7   | 0.10657 | -0.3593 | 0.231 | 0.3  | 1 MS.Trt_vs_MS.NoTrt_B |
| DDX17    | 0.1066  | 0.32539 | 0.749 | 0.95 | 1 MS.Trt_vs_MS.NoTrt_B |
| VWA7     | 0.10665 | 0.49351 | 0.242 | 0.31 | 1 MS.Trt_vs_MS.NoTrt_B |
| TRA2B    | 0.10693 | 0.40558 | 0.431 | 0.51 | 1 MS.Trt_vs_MS.NoTrt_B |
| FAM204A  | 0.10764 | 0.39528 | 0.407 | 0.47 | 1 MS.Trt_vs_MS.NoTrt_B |
| CLYBL    | 0.10774 | 0.91943 | 0.068 | 0.11 | 1 MS.Trt_vs_MS.NoTrt_B |
| FAM124B  | 0.10795 | -0.2881 | 0.065 | 0.1  | 1 MS.Trt_vs_MS.NoTrt_B |
| LMAN1    | 0.10797 | 0.67238 | 0.124 | 0.18 | 1 MS.Trt_vs_MS.NoTrt_B |
| ENTPD6   | 0.10811 | -0.2985 | 0.078 | 0.12 | 1 MS.Trt_vs_MS.NoTrt_B |
| WAPL     | 0.10815 | 0.26012 | 0.357 | 0.45 | 1 MS.Trt_vs_MS.NoTrt_B |

|           |         |         |       |      |                        |
|-----------|---------|---------|-------|------|------------------------|
| FN3KRP    | 0.10823 | 0.32165 | 0.065 | 0.1  | 1 MS.Trt_vs_MS.NoTrt_B |
| SAMD4B    | 0.10841 | 0.56971 | 0.717 | 0.85 | 1 MS.Trt_vs_MS.NoTrt_B |
| AP4B1     | 0.10844 | 0.63993 | 0.505 | 0.61 | 1 MS.Trt_vs_MS.NoTrt_B |
| POLR2K    | 0.10847 | 0.57284 | 0.092 | 0.14 | 1 MS.Trt_vs_MS.NoTrt_B |
| CCDC148   | 0.10899 | -0.4055 | 0.159 | 0.22 | 1 MS.Trt_vs_MS.NoTrt_B |
| TLR5      | 0.10908 | 1.10163 | 0.488 | 0.61 | 1 MS.Trt_vs_MS.NoTrt_B |
| RB1CC1    | 0.10917 | 0.42523 | 0.27  | 0.34 | 1 MS.Trt_vs_MS.NoTrt_B |
| NEK9      | 0.10923 | 0.28166 | 0.758 | 0.87 | 1 MS.Trt_vs_MS.NoTrt_B |
| TRAPPC12  | 0.10963 | 0.29035 | 0.46  | 0.57 | 1 MS.Trt_vs_MS.NoTrt_B |
| UBA2      | 0.10981 | 0.77789 | 0.462 | 0.54 | 1 MS.Trt_vs_MS.NoTrt_B |
| LYZ       | 0.10981 | 0.60547 | 0.301 | 0.38 | 1 MS.Trt_vs_MS.NoTrt_B |
| MRLN      | 0.10998 | 0.256   | 0.481 | 0.63 | 1 MS.Trt_vs_MS.NoTrt_B |
| ZNF846    | 0.11001 | 0.58354 | 0.364 | 0.44 | 1 MS.Trt_vs_MS.NoTrt_B |
| NADK      | 0.11002 | 0.28141 | 0.198 | 0.27 | 1 MS.Trt_vs_MS.NoTrt_B |
| LAMP3     | 0.11052 | -0.8738 | 0.342 | 0.41 | 1 MS.Trt_vs_MS.NoTrt_B |
| PROX2     | 0.11086 | -0.5375 | 0.07  | 0.11 | 1 MS.Trt_vs_MS.NoTrt_B |
| TTLL4     | 0.11113 | 0.3268  | 0.251 | 0.32 | 1 MS.Trt_vs_MS.NoTrt_B |
| TSN       | 0.11161 | 0.70515 | 0.272 | 0.35 | 1 MS.Trt_vs_MS.NoTrt_B |
| MAPK8     | 0.11206 | 0.28177 | 0.327 | 0.39 | 1 MS.Trt_vs_MS.NoTrt_B |
| PGM3      | 0.1121  | 0.89198 | 0.181 | 0.25 | 1 MS.Trt_vs_MS.NoTrt_B |
| AGBL5     | 0.11221 | -0.305  | 0.113 | 0.16 | 1 MS.Trt_vs_MS.NoTrt_B |
| FAM208A   | 0.11249 | 0.7385  | 0.651 | 0.72 | 1 MS.Trt_vs_MS.NoTrt_B |
| HEATR1    | 0.11277 | 0.41535 | 0.098 | 0.14 | 1 MS.Trt_vs_MS.NoTrt_B |
| WDR97     | 0.11284 | 0.26798 | 0.351 | 0.44 | 1 MS.Trt_vs_MS.NoTrt_B |
| MRPS27    | 0.11288 | -0.6217 | 0.477 | 0.51 | 1 MS.Trt_vs_MS.NoTrt_B |
| TRAK2     | 0.11307 | 0.63824 | 0.176 | 0.24 | 1 MS.Trt_vs_MS.NoTrt_B |
| ENOX2     | 0.11314 | 0.7222  | 0.07  | 0.11 | 1 MS.Trt_vs_MS.NoTrt_B |
| LINC00116 | 0.11323 | 0.80044 | 0.124 | 0.17 | 1 MS.Trt_vs_MS.NoTrt_B |
| NEDD4L    | 0.11325 | -0.3084 | 0.39  | 0.43 | 1 MS.Trt_vs_MS.NoTrt_B |
| EPN2      | 0.11429 | 0.38226 | 0.643 | 0.81 | 1 MS.Trt_vs_MS.NoTrt_B |
| LPAR2     | 0.11483 | -0.6436 | 0.072 | 0.11 | 1 MS.Trt_vs_MS.NoTrt_B |
| TFAP4     | 0.11484 | 0.31275 | 0.551 | 0.67 | 1 MS.Trt_vs_MS.NoTrt_B |
| RHOC      | 0.11487 | -0.8521 | 0.083 | 0.12 | 1 MS.Trt_vs_MS.NoTrt_B |
| ZNF107    | 0.11517 | 0.5142  | 0.355 | 0.42 | 1 MS.Trt_vs_MS.NoTrt_B |
| TATDN1    | 0.11525 | -0.3361 | 0.59  | 0.63 | 1 MS.Trt_vs_MS.NoTrt_B |
| SLX4      | 0.1156  | 1.60549 | 0.355 | 0.45 | 1 MS.Trt_vs_MS.NoTrt_B |
| RMI1      | 0.11573 | 0.57384 | 0.181 | 0.24 | 1 MS.Trt_vs_MS.NoTrt_B |
| KYAT1     | 0.11587 | 0.37967 | 0.105 | 0.15 | 1 MS.Trt_vs_MS.NoTrt_B |
| COL6A3    | 0.1159  | -0.4773 | 0.364 | 0.45 | 1 MS.Trt_vs_MS.NoTrt_B |
| PFAS      | 0.11613 | 0.27362 | 0.497 | 0.47 | 1 MS.Trt_vs_MS.NoTrt_B |

|            |         |         |       |      |   |                      |
|------------|---------|---------|-------|------|---|----------------------|
| RP2        | 0.11623 | 0.63862 | 0.588 | 0.62 | 1 | MS.Trt_vs_MS.NoTrt_B |
| NUCB2      | 0.1165  | 0.45016 | 0.891 | 0.94 | 1 | MS.Trt_vs_MS.NoTrt_B |
| CD38       | 0.11675 | 0.59201 | 0.246 | 0.31 | 1 | MS.Trt_vs_MS.NoTrt_B |
| MRPL35     | 0.11684 | 0.43115 | 0.065 | 0.1  | 1 | MS.Trt_vs_MS.NoTrt_B |
| SMPDL3B    | 0.11685 | -0.3486 | 0.078 | 0.12 | 1 | MS.Trt_vs_MS.NoTrt_B |
| RGSL1      | 0.11709 | 0.54087 | 0.174 | 0.13 | 1 | MS.Trt_vs_MS.NoTrt_B |
| LZTFL1     | 0.11723 | -0.5623 | 0.481 | 0.57 | 1 | MS.Trt_vs_MS.NoTrt_B |
| MFSD14B    | 0.11731 | 0.72239 | 0.078 | 0.12 | 1 | MS.Trt_vs_MS.NoTrt_B |
| SLC25A23   | 0.11737 | 0.84565 | 0.405 | 0.52 | 1 | MS.Trt_vs_MS.NoTrt_B |
| BPNT1      | 0.11761 | -0.5727 | 0.569 | 0.64 | 1 | MS.Trt_vs_MS.NoTrt_B |
| URGCP      | 0.11762 | 0.49073 | 0.386 | 0.49 | 1 | MS.Trt_vs_MS.NoTrt_B |
| NDST1      | 0.11773 | 0.31273 | 0.318 | 0.25 | 1 | MS.Trt_vs_MS.NoTrt_B |
| SSFA2      | 0.11783 | 0.78499 | 0.078 | 0.12 | 1 | MS.Trt_vs_MS.NoTrt_B |
| AVPR1A     | 0.11812 | 0.38363 | 0.144 | 0.1  | 1 | MS.Trt_vs_MS.NoTrt_B |
| MED12      | 0.11817 | 0.64433 | 0.144 | 0.2  | 1 | MS.Trt_vs_MS.NoTrt_B |
| OSER1      | 0.11833 | 0.33159 | 0.155 | 0.21 | 1 | MS.Trt_vs_MS.NoTrt_B |
| NISCH      | 0.11833 | 0.30706 | 0.355 | 0.42 | 1 | MS.Trt_vs_MS.NoTrt_B |
| SMC3       | 0.11855 | 0.28669 | 0.194 | 0.25 | 1 | MS.Trt_vs_MS.NoTrt_B |
| SS18L1     | 0.11861 | 0.28097 | 0.322 | 0.41 | 1 | MS.Trt_vs_MS.NoTrt_B |
| EBLN2      | 0.11871 | -0.2845 | 0.085 | 0.12 | 1 | MS.Trt_vs_MS.NoTrt_B |
| GOLGA7     | 0.11873 | 0.58653 | 0.218 | 0.28 | 1 | MS.Trt_vs_MS.NoTrt_B |
| OTOA       | 0.11947 | 0.30885 | 0.264 | 0.33 | 1 | MS.Trt_vs_MS.NoTrt_B |
| CUL1       | 0.12024 | 0.5008  | 0.137 | 0.19 | 1 | MS.Trt_vs_MS.NoTrt_B |
| ZNHIT3     | 0.12062 | -0.299  | 0.773 | 0.84 | 1 | MS.Trt_vs_MS.NoTrt_B |
| IGSF1      | 0.12066 | 0.42974 | 0.366 | 0.31 | 1 | MS.Trt_vs_MS.NoTrt_B |
| RP11-166B2 | 0.12103 | 0.39207 | 0.377 | 0.48 | 1 | MS.Trt_vs_MS.NoTrt_B |
| GTPBP4     | 0.12139 | -0.725  | 0.379 | 0.44 | 1 | MS.Trt_vs_MS.NoTrt_B |
| PTGIR      | 0.12157 | 0.34671 | 0.54  | 0.62 | 1 | MS.Trt_vs_MS.NoTrt_B |
| ARHGAP35   | 0.12178 | -0.5046 | 0.146 | 0.19 | 1 | MS.Trt_vs_MS.NoTrt_B |
| AGGF1      | 0.12179 | 0.38547 | 0.078 | 0.12 | 1 | MS.Trt_vs_MS.NoTrt_B |
| ZNF341     | 0.12181 | 0.67143 | 0.312 | 0.41 | 1 | MS.Trt_vs_MS.NoTrt_B |
| FARP1      | 0.12219 | 0.37394 | 0.878 | 0.95 | 1 | MS.Trt_vs_MS.NoTrt_B |
| ZNF485     | 0.12275 | 0.2978  | 0.12  | 0.17 | 1 | MS.Trt_vs_MS.NoTrt_B |
| EIF4E      | 0.12306 | 0.35422 | 0.928 | 1    | 1 | MS.Trt_vs_MS.NoTrt_B |
| MCF2L      | 0.12319 | -0.3896 | 0.211 | 0.28 | 1 | MS.Trt_vs_MS.NoTrt_B |
| TMEM236    | 0.12351 | 0.47669 | 0.702 | 0.71 | 1 | MS.Trt_vs_MS.NoTrt_B |
| AIDA       | 0.12363 | 0.7484  | 0.089 | 0.13 | 1 | MS.Trt_vs_MS.NoTrt_B |
| CC2D1B     | 0.12379 | 0.36901 | 0.523 | 0.6  | 1 | MS.Trt_vs_MS.NoTrt_B |
| FER        | 0.12396 | 0.27733 | 0.359 | 0.46 | 1 | MS.Trt_vs_MS.NoTrt_B |
| AMDHD1     | 0.12397 | -0.4174 | 0.126 | 0.17 | 1 | MS.Trt_vs_MS.NoTrt_B |

|           |         |         |       |      |                        |
|-----------|---------|---------|-------|------|------------------------|
| RREB1     | 0.12413 | 0.66587 | 0.593 | 0.74 | 1 MS.Trt_vs_MS.NoTrt_B |
| PPME1     | 0.1242  | -0.886  | 0.098 | 0.14 | 1 MS.Trt_vs_MS.NoTrt_B |
| FPGS      | 0.12427 | -0.4248 | 0.159 | 0.21 | 1 MS.Trt_vs_MS.NoTrt_B |
| HIST1H2BG | 0.12466 | 0.38556 | 0.403 | 0.47 | 1 MS.Trt_vs_MS.NoTrt_B |
| PRPS2     | 0.12515 | -0.277  | 0.081 | 0.12 | 1 MS.Trt_vs_MS.NoTrt_B |
| LINC00961 | 0.12521 | 0.30313 | 0.305 | 0.25 | 1 MS.Trt_vs_MS.NoTrt_B |
| CPNE2     | 0.12526 | 0.63389 | 0.305 | 0.37 | 1 MS.Trt_vs_MS.NoTrt_B |
| KLF2      | 0.12536 | 0.47839 | 0.207 | 0.27 | 1 MS.Trt_vs_MS.NoTrt_B |
| OPA3      | 0.12543 | -0.2621 | 0.902 | 0.97 | 1 MS.Trt_vs_MS.NoTrt_B |
| PKD2      | 0.12608 | -0.6705 | 0.131 | 0.18 | 1 MS.Trt_vs_MS.NoTrt_B |
| LTB4R     | 0.1261  | -0.8323 | 0.255 | 0.31 | 1 MS.Trt_vs_MS.NoTrt_B |
| ATP13A1   | 0.12632 | 0.52235 | 0.244 | 0.3  | 1 MS.Trt_vs_MS.NoTrt_B |
| UBXN11    | 0.1265  | 0.45621 | 0.15  | 0.2  | 1 MS.Trt_vs_MS.NoTrt_B |
| SEMA4C    | 0.12667 | 1.05053 | 0.643 | 0.76 | 1 MS.Trt_vs_MS.NoTrt_B |
| ADAM32    | 0.1267  | 0.47468 | 0.673 | 0.82 | 1 MS.Trt_vs_MS.NoTrt_B |
| CHORDC1   | 0.12698 | 0.29174 | 0.344 | 0.42 | 1 MS.Trt_vs_MS.NoTrt_B |
| SPPL2B    | 0.12705 | -0.6088 | 0.312 | 0.37 | 1 MS.Trt_vs_MS.NoTrt_B |
| IER3IP1   | 0.12706 | 0.92614 | 0.102 | 0.15 | 1 MS.Trt_vs_MS.NoTrt_B |
| MGAT4A    | 0.12727 | 0.73298 | 0.34  | 0.41 | 1 MS.Trt_vs_MS.NoTrt_B |
| AIPL1     | 0.12756 | 0.26532 | 0.375 | 0.32 | 1 MS.Trt_vs_MS.NoTrt_B |
| ADAM15    | 0.12771 | -0.9327 | 0.285 | 0.34 | 1 MS.Trt_vs_MS.NoTrt_B |
| SLC38A2   | 0.12871 | 0.31671 | 0.161 | 0.21 | 1 MS.Trt_vs_MS.NoTrt_B |
| GTF2H4    | 0.12893 | -1.2783 | 0.068 | 0.1  | 1 MS.Trt_vs_MS.NoTrt_B |
| C11orf24  | 0.12905 | 0.82228 | 0.174 | 0.23 | 1 MS.Trt_vs_MS.NoTrt_B |
| EFCAB3    | 0.12931 | 0.35318 | 0.451 | 0.61 | 1 MS.Trt_vs_MS.NoTrt_B |
| SLC39A4   | 0.12984 | 0.71946 | 0.301 | 0.37 | 1 MS.Trt_vs_MS.NoTrt_B |
| ZMYM3     | 0.12986 | 0.48798 | 0.307 | 0.4  | 1 MS.Trt_vs_MS.NoTrt_B |
| UMAD1     | 0.13015 | 0.63275 | 0.115 | 0.16 | 1 MS.Trt_vs_MS.NoTrt_B |
| VARS2     | 0.1303  | -0.8979 | 0.39  | 0.45 | 1 MS.Trt_vs_MS.NoTrt_B |
| SPAG9     | 0.13048 | 0.35065 | 0.747 | 0.87 | 1 MS.Trt_vs_MS.NoTrt_B |
| MT-ATP8   | 0.13074 | 0.65811 | 0.614 | 0.84 | 1 MS.Trt_vs_MS.NoTrt_B |
| DYNLL2    | 0.13089 | 0.98575 | 0.1   | 0.14 | 1 MS.Trt_vs_MS.NoTrt_B |
| PFDN4     | 0.13149 | 1.10696 | 0.078 | 0.12 | 1 MS.Trt_vs_MS.NoTrt_B |
| SATB1     | 0.13155 | 0.50882 | 0.176 | 0.12 | 1 MS.Trt_vs_MS.NoTrt_B |
| MAF       | 0.13159 | 0.86447 | 0.224 | 0.29 | 1 MS.Trt_vs_MS.NoTrt_B |
| TRNT1     | 0.13267 | -0.2562 | 0.233 | 0.28 | 1 MS.Trt_vs_MS.NoTrt_B |
| PON2      | 0.13312 | 0.42095 | 0.329 | 0.41 | 1 MS.Trt_vs_MS.NoTrt_B |
| ZNF140    | 0.13315 | -0.546  | 0.124 | 0.17 | 1 MS.Trt_vs_MS.NoTrt_B |
| KIAA0408  | 0.1339  | 0.74748 | 0.277 | 0.22 | 1 MS.Trt_vs_MS.NoTrt_B |
| DHX9      | 0.13405 | 0.34473 | 0.187 | 0.24 | 1 MS.Trt_vs_MS.NoTrt_B |

|            |         |         |       |      |                        |
|------------|---------|---------|-------|------|------------------------|
| CEP19      | 0.13406 | 1.20579 | 0.492 | 0.58 | 1 MS.Trt_vs_MS.NoTrt_B |
| AICDA      | 0.13415 | 0.25758 | 0.453 | 0.54 | 1 MS.Trt_vs_MS.NoTrt_B |
| UBL3       | 0.13419 | 0.41806 | 0.179 | 0.24 | 1 MS.Trt_vs_MS.NoTrt_B |
| KIAA1191   | 0.13431 | 0.29585 | 0.512 | 0.63 | 1 MS.Trt_vs_MS.NoTrt_B |
| ZNF480     | 0.13489 | 1.42768 | 0.549 | 0.72 | 1 MS.Trt_vs_MS.NoTrt_B |
| LLGL2      | 0.13492 | 0.27858 | 0.386 | 0.34 | 1 MS.Trt_vs_MS.NoTrt_B |
| C1orf174   | 0.13508 | 0.40832 | 0.455 | 0.55 | 1 MS.Trt_vs_MS.NoTrt_B |
| HNRNPUL2   | 0.13521 | 0.49239 | 0.072 | 0.11 | 1 MS.Trt_vs_MS.NoTrt_B |
| ACSL4      | 0.13536 | -0.3455 | 0.105 | 0.15 | 1 MS.Trt_vs_MS.NoTrt_B |
| KCNMB3     | 0.13546 | 1.09598 | 0.301 | 0.38 | 1 MS.Trt_vs_MS.NoTrt_B |
| ACAP3      | 0.13568 | -0.7058 | 0.087 | 0.12 | 1 MS.Trt_vs_MS.NoTrt_B |
| CROCC      | 0.13579 | 0.60107 | 0.397 | 0.47 | 1 MS.Trt_vs_MS.NoTrt_B |
| ZSCAN22    | 0.13588 | -1.1466 | 0.325 | 0.41 | 1 MS.Trt_vs_MS.NoTrt_B |
| L3HYPDH    | 0.13618 | 1.15399 | 0.144 | 0.2  | 1 MS.Trt_vs_MS.NoTrt_B |
| CD302      | 0.13619 | 0.80819 | 0.235 | 0.29 | 1 MS.Trt_vs_MS.NoTrt_B |
| OARD1      | 0.13623 | 0.66128 | 0.172 | 0.23 | 1 MS.Trt_vs_MS.NoTrt_B |
| RP11-644F5 | 0.13745 | 0.47719 | 0.551 | 0.64 | 1 MS.Trt_vs_MS.NoTrt_B |
| ZBTB11     | 0.13782 | 1.00552 | 0.42  | 0.51 | 1 MS.Trt_vs_MS.NoTrt_B |
| C1S        | 0.13866 | 0.31302 | 0.481 | 0.6  | 1 MS.Trt_vs_MS.NoTrt_B |
| PLAG1      | 0.13879 | 1.02791 | 0.312 | 0.25 | 1 MS.Trt_vs_MS.NoTrt_B |
| PRKCB      | 0.13891 | 0.64276 | 0.259 | 0.32 | 1 MS.Trt_vs_MS.NoTrt_B |
| AFAP1      | 0.13929 | 0.86358 | 0.279 | 0.35 | 1 MS.Trt_vs_MS.NoTrt_B |
| KLHL26     | 0.13968 | 1.07798 | 0.434 | 0.57 | 1 MS.Trt_vs_MS.NoTrt_B |
| SPDYE6     | 0.14004 | 0.73234 | 0.094 | 0.14 | 1 MS.Trt_vs_MS.NoTrt_B |
| TPRA1      | 0.1405  | 0.86775 | 0.118 | 0.16 | 1 MS.Trt_vs_MS.NoTrt_B |
| CEP70      | 0.14102 | 1.26345 | 0.126 | 0.17 | 1 MS.Trt_vs_MS.NoTrt_B |
| LINS1      | 0.14111 | 0.75979 | 0.449 | 0.55 | 1 MS.Trt_vs_MS.NoTrt_B |
| VDAC2      | 0.14133 | 0.45291 | 0.248 | 0.31 | 1 MS.Trt_vs_MS.NoTrt_B |
| ATXN7L3B   | 0.14138 | 0.30391 | 0.126 | 0.17 | 1 MS.Trt_vs_MS.NoTrt_B |
| TMED4      | 0.1415  | 0.38532 | 0.861 | 0.9  | 1 MS.Trt_vs_MS.NoTrt_B |
| URI1       | 0.14165 | 1.16272 | 0.174 | 0.13 | 1 MS.Trt_vs_MS.NoTrt_B |
| OSBPL10    | 0.14247 | 0.65449 | 0.292 | 0.35 | 1 MS.Trt_vs_MS.NoTrt_B |
| TPX2       | 0.14274 | -0.3649 | 0.148 | 0.2  | 1 MS.Trt_vs_MS.NoTrt_B |
| DUS4L      | 0.14291 | -0.3899 | 0.07  | 0.1  | 1 MS.Trt_vs_MS.NoTrt_B |
| OCEL1      | 0.14297 | -0.483  | 0.41  | 0.49 | 1 MS.Trt_vs_MS.NoTrt_B |
| ARHGEF40   | 0.14305 | 0.78573 | 0.107 | 0.15 | 1 MS.Trt_vs_MS.NoTrt_B |
| DENND4B    | 0.14357 | 0.30863 | 0.179 | 0.24 | 1 MS.Trt_vs_MS.NoTrt_B |
| PEX19      | 0.1438  | 0.25341 | 0.105 | 0.15 | 1 MS.Trt_vs_MS.NoTrt_B |
| IL7R       | 0.1439  | 0.36376 | 0.791 | 0.83 | 1 MS.Trt_vs_MS.NoTrt_B |
| TPH1       | 0.14403 | 0.90898 | 0.353 | 0.44 | 1 MS.Trt_vs_MS.NoTrt_B |

|             |         |         |       |      |                        |
|-------------|---------|---------|-------|------|------------------------|
| OXNAD1      | 0.14404 | 0.7056  | 0.211 | 0.28 | 1 MS.Trt_vs_MS.NoTrt_B |
| BRE         | 0.14439 | -0.2831 | 0.135 | 0.18 | 1 MS.Trt_vs_MS.NoTrt_B |
| ADAMTS17    | 0.14442 | 1.25627 | 0.115 | 0.16 | 1 MS.Trt_vs_MS.NoTrt_B |
| CLOCK       | 0.14449 | 0.25232 | 0.115 | 0.16 | 1 MS.Trt_vs_MS.NoTrt_B |
| GTF2F2      | 0.14465 | 0.53324 | 0.148 | 0.2  | 1 MS.Trt_vs_MS.NoTrt_B |
| FASTKD5     | 0.14495 | 0.94306 | 0.113 | 0.08 | 1 MS.Trt_vs_MS.NoTrt_B |
| SMAD5       | 0.14503 | 0.4154  | 0.366 | 0.47 | 1 MS.Trt_vs_MS.NoTrt_B |
| CPT2        | 0.14537 | 0.47782 | 0.634 | 0.75 | 1 MS.Trt_vs_MS.NoTrt_B |
| SGTA        | 0.14539 | -0.3003 | 0.403 | 0.47 | 1 MS.Trt_vs_MS.NoTrt_B |
| RP11-603J24 | 0.14556 | 0.39041 | 0.144 | 0.2  | 1 MS.Trt_vs_MS.NoTrt_B |
| IRGQ        | 0.14564 | 0.3044  | 0.928 | 0.99 | 1 MS.Trt_vs_MS.NoTrt_B |
| VPS9D1      | 0.14577 | 1.05824 | 0.187 | 0.24 | 1 MS.Trt_vs_MS.NoTrt_B |
| ANKDD1A     | 0.14607 | 0.7517  | 0.431 | 0.52 | 1 MS.Trt_vs_MS.NoTrt_B |
| RAB21       | 0.14623 | 0.67484 | 0.917 | 0.97 | 1 MS.Trt_vs_MS.NoTrt_B |
| UBE2D4      | 0.14652 | 0.30153 | 0.599 | 0.53 | 1 MS.Trt_vs_MS.NoTrt_B |
| IFRD1       | 0.14666 | -0.3325 | 0.264 | 0.33 | 1 MS.Trt_vs_MS.NoTrt_B |
| ZNF426      | 0.14705 | 0.80846 | 0.83  | 0.9  | 1 MS.Trt_vs_MS.NoTrt_B |
| HERPUD1     | 0.14753 | 0.44818 | 0.625 | 0.69 | 1 MS.Trt_vs_MS.NoTrt_B |
| GADD45GIP   | 0.14856 | 0.40121 | 0.102 | 0.15 | 1 MS.Trt_vs_MS.NoTrt_B |
| JUNB        | 0.1486  | 0.59276 | 0.288 | 0.38 | 1 MS.Trt_vs_MS.NoTrt_B |
| LIG3        | 0.14881 | -0.747  | 0.281 | 0.33 | 1 MS.Trt_vs_MS.NoTrt_B |
| SERF1B      | 0.14891 | 0.41086 | 0.307 | 0.39 | 1 MS.Trt_vs_MS.NoTrt_B |
| COIL        | 0.14893 | 1.53847 | 0.083 | 0.12 | 1 MS.Trt_vs_MS.NoTrt_B |
| CEP128      | 0.149   | 0.62085 | 0.172 | 0.23 | 1 MS.Trt_vs_MS.NoTrt_B |
| STYXL1      | 0.14938 | -0.3348 | 0.2   | 0.25 | 1 MS.Trt_vs_MS.NoTrt_B |
| AAED1       | 0.14989 | 0.87015 | 0.691 | 0.78 | 1 MS.Trt_vs_MS.NoTrt_B |
| TCTN2       | 0.15033 | 0.56793 | 0.617 | 0.76 | 1 MS.Trt_vs_MS.NoTrt_B |
| MOSPD1      | 0.15036 | 0.76144 | 0.137 | 0.18 | 1 MS.Trt_vs_MS.NoTrt_B |
| SLC2A1      | 0.15101 | -0.6086 | 0.07  | 0.1  | 1 MS.Trt_vs_MS.NoTrt_B |
| ANKRD39     | 0.15105 | 0.26459 | 0.159 | 0.21 | 1 MS.Trt_vs_MS.NoTrt_B |
| TCP11L1     | 0.1511  | 0.68035 | 0.159 | 0.2  | 1 MS.Trt_vs_MS.NoTrt_B |
| EML2        | 0.15125 | -0.5702 | 0.575 | 0.67 | 1 MS.Trt_vs_MS.NoTrt_B |
| TOX4        | 0.15127 | 0.319   | 0.641 | 0.71 | 1 MS.Trt_vs_MS.NoTrt_B |
| FARSB       | 0.15146 | 0.47303 | 0.521 | 0.57 | 1 MS.Trt_vs_MS.NoTrt_B |
| TIPIN       | 0.15205 | 0.25082 | 0.484 | 0.59 | 1 MS.Trt_vs_MS.NoTrt_B |
| MESDC2      | 0.15235 | 0.53897 | 0.436 | 0.5  | 1 MS.Trt_vs_MS.NoTrt_B |
| PLCE1       | 0.15276 | 0.5838  | 0.797 | 0.88 | 1 MS.Trt_vs_MS.NoTrt_B |
| RLF         | 0.15297 | 0.27225 | 0.122 | 0.16 | 1 MS.Trt_vs_MS.NoTrt_B |
| MT1X        | 0.15325 | 0.6398  | 0.096 | 0.14 | 1 MS.Trt_vs_MS.NoTrt_B |
| ITGA6       | 0.15329 | 0.34633 | 0.161 | 0.21 | 1 MS.Trt_vs_MS.NoTrt_B |



|          |         |         |       |      |   |                      |
|----------|---------|---------|-------|------|---|----------------------|
| DNAAF5   | 0.15371 | 2.54238 | 0.166 | 0.12 | 1 | MS.Trt_vs_MS.NoTrt_B |
| SMC1A    | 0.1539  | 0.44877 | 0.176 | 0.23 | 1 | MS.Trt_vs_MS.NoTrt_B |
| ATPAF2   | 0.15429 | 0.33639 | 0.357 | 0.45 | 1 | MS.Trt_vs_MS.NoTrt_B |
| GEMIN7   | 0.1543  | 0.55861 | 0.172 | 0.22 | 1 | MS.Trt_vs_MS.NoTrt_B |
| MRPS5    | 0.15458 | 0.33362 | 0.699 | 0.88 | 1 | MS.Trt_vs_MS.NoTrt_B |
| CDRT4    | 0.15496 | -0.3521 | 0.083 | 0.12 | 1 | MS.Trt_vs_MS.NoTrt_B |
| PHF6     | 0.15521 | 1.16196 | 0.573 | 0.59 | 1 | MS.Trt_vs_MS.NoTrt_B |
| HOPX     | 0.15533 | 0.47809 | 0.691 | 0.85 | 1 | MS.Trt_vs_MS.NoTrt_B |
| SKIV2L2  | 0.15547 | 0.27344 | 0.723 | 0.85 | 1 | MS.Trt_vs_MS.NoTrt_B |
| GPM6B    | 0.15551 | 0.42904 | 0.107 | 0.15 | 1 | MS.Trt_vs_MS.NoTrt_B |
| PECR     | 0.15589 | 0.42542 | 0.641 | 0.71 | 1 | MS.Trt_vs_MS.NoTrt_B |
| MAPK8IP3 | 0.15616 | 0.44358 | 0.118 | 0.16 | 1 | MS.Trt_vs_MS.NoTrt_B |
| WDR43    | 0.15626 | 0.39713 | 0.357 | 0.43 | 1 | MS.Trt_vs_MS.NoTrt_B |
| DCAF11   | 0.15629 | -0.863  | 0.632 | 0.78 | 1 | MS.Trt_vs_MS.NoTrt_B |
| OAZ3     | 0.15641 | 0.85814 | 0.307 | 0.38 | 1 | MS.Trt_vs_MS.NoTrt_B |
| FAM168A  | 0.15645 | 0.57866 | 0.078 | 0.11 | 1 | MS.Trt_vs_MS.NoTrt_B |
| PSMG4    | 0.15705 | 0.32882 | 0.691 | 0.77 | 1 | MS.Trt_vs_MS.NoTrt_B |
| PDIA6    | 0.15711 | 0.46151 | 0.17  | 0.23 | 1 | MS.Trt_vs_MS.NoTrt_B |
| PPP1R3E  | 0.1573  | -0.5081 | 0.181 | 0.23 | 1 | MS.Trt_vs_MS.NoTrt_B |
| BBS1     | 0.1577  | -0.309  | 0.501 | 0.58 | 1 | MS.Trt_vs_MS.NoTrt_B |
| CCDC174  | 0.15784 | 1.34597 | 0.153 | 0.11 | 1 | MS.Trt_vs_MS.NoTrt_B |
| MBNL2    | 0.15842 | 0.28832 | 0.137 | 0.18 | 1 | MS.Trt_vs_MS.NoTrt_B |
| KLHL8    | 0.15861 | 0.35917 | 0.51  | 0.58 | 1 | MS.Trt_vs_MS.NoTrt_B |
| SLC4A8   | 0.15882 | 0.96572 | 0.784 | 0.9  | 1 | MS.Trt_vs_MS.NoTrt_B |
| TMEM135  | 0.15907 | 0.46454 | 0.621 | 0.74 | 1 | MS.Trt_vs_MS.NoTrt_B |
| HOMEZ    | 0.15941 | 0.82105 | 0.192 | 0.24 | 1 | MS.Trt_vs_MS.NoTrt_B |
| FXN      | 0.15975 | 0.39536 | 0.146 | 0.2  | 1 | MS.Trt_vs_MS.NoTrt_B |
| KLF7     | 0.15989 | -1.0611 | 0.124 | 0.16 | 1 | MS.Trt_vs_MS.NoTrt_B |
| SET      | 0.15998 | 0.47838 | 0.854 | 0.98 | 1 | MS.Trt_vs_MS.NoTrt_B |
| RSL1D1   | 0.16017 | 0.57642 | 0.73  | 0.86 | 1 | MS.Trt_vs_MS.NoTrt_B |
| UBR3     | 0.16026 | 1.30885 | 0.096 | 0.14 | 1 | MS.Trt_vs_MS.NoTrt_B |
| TMEM185B | 0.16071 | -0.9974 | 0.272 | 0.33 | 1 | MS.Trt_vs_MS.NoTrt_B |
| RIPK1    | 0.1611  | -0.6175 | 0.12  | 0.16 | 1 | MS.Trt_vs_MS.NoTrt_B |
| YARS2    | 0.16136 | 0.79128 | 0.283 | 0.36 | 1 | MS.Trt_vs_MS.NoTrt_B |
| SFT2D1   | 0.16168 | 0.49754 | 0.309 | 0.35 | 1 | MS.Trt_vs_MS.NoTrt_B |
| TMEM168  | 0.16176 | 0.76949 | 0.412 | 0.48 | 1 | MS.Trt_vs_MS.NoTrt_B |
| NPTXR    | 0.16224 | 0.48785 | 0.272 | 0.35 | 1 | MS.Trt_vs_MS.NoTrt_B |
| KCTD19   | 0.16241 | 0.25499 | 0.571 | 0.69 | 1 | MS.Trt_vs_MS.NoTrt_B |
| ZNF84    | 0.16266 | 1.00652 | 0.209 | 0.26 | 1 | MS.Trt_vs_MS.NoTrt_B |
| SMIM8    | 0.16354 | 0.73757 | 0.466 | 0.52 | 1 | MS.Trt_vs_MS.NoTrt_B |

|          |         |         |       |      |                        |
|----------|---------|---------|-------|------|------------------------|
| PIR      | 0.1636  | 0.3388  | 0.366 | 0.47 | 1 MS.Trt_vs_MS.NoTrt_B |
| KLHDC10  | 0.16363 | 1.14099 | 0.314 | 0.4  | 1 MS.Trt_vs_MS.NoTrt_B |
| USP1     | 0.16387 | 0.2714  | 0.115 | 0.16 | 1 MS.Trt_vs_MS.NoTrt_B |
| DSC2     | 0.16432 | -1.2221 | 0.22  | 0.27 | 1 MS.Trt_vs_MS.NoTrt_B |
| ZNF684   | 0.16442 | 0.83668 | 0.573 | 0.69 | 1 MS.Trt_vs_MS.NoTrt_B |
| SYK      | 0.16449 | 0.49002 | 0.288 | 0.35 | 1 MS.Trt_vs_MS.NoTrt_B |
| CES2     | 0.16496 | -0.6757 | 0.224 | 0.27 | 1 MS.Trt_vs_MS.NoTrt_B |
| PARP10   | 0.16506 | 0.29453 | 0.092 | 0.13 | 1 MS.Trt_vs_MS.NoTrt_B |
| RBBP7    | 0.16562 | 0.30119 | 0.632 | 0.69 | 1 MS.Trt_vs_MS.NoTrt_B |
| MZF1     | 0.16592 | 0.62298 | 0.083 | 0.12 | 1 MS.Trt_vs_MS.NoTrt_B |
| ZKSCAN4  | 0.16615 | -0.381  | 0.349 | 0.42 | 1 MS.Trt_vs_MS.NoTrt_B |
| YLPM1    | 0.16619 | 0.57828 | 0.473 | 0.54 | 1 MS.Trt_vs_MS.NoTrt_B |
| RHBG     | 0.16707 | 0.55662 | 0.634 | 0.75 | 1 MS.Trt_vs_MS.NoTrt_B |
| ALG5     | 0.16744 | 0.58012 | 0.434 | 0.37 | 1 MS.Trt_vs_MS.NoTrt_B |
| CRLF2    | 0.16756 | 0.45375 | 0.216 | 0.28 | 1 MS.Trt_vs_MS.NoTrt_B |
| MBTPS2   | 0.16787 | 0.36101 | 0.224 | 0.28 | 1 MS.Trt_vs_MS.NoTrt_B |
| MFSD8    | 0.16802 | -0.4457 | 0.29  | 0.34 | 1 MS.Trt_vs_MS.NoTrt_B |
| FZR1     | 0.16831 | -0.8253 | 0.072 | 0.1  | 1 MS.Trt_vs_MS.NoTrt_B |
| TRA2A    | 0.16897 | 0.55877 | 0.688 | 0.81 | 1 MS.Trt_vs_MS.NoTrt_B |
| WRAP73   | 0.16907 | 0.25544 | 0.261 | 0.31 | 1 MS.Trt_vs_MS.NoTrt_B |
| HIGD1A   | 0.16932 | 0.72185 | 0.115 | 0.16 | 1 MS.Trt_vs_MS.NoTrt_B |
| LRRC69   | 0.17    | -0.3227 | 0.466 | 0.51 | 1 MS.Trt_vs_MS.NoTrt_B |
| GTPBP2   | 0.1702  | 0.51846 | 0.462 | 0.52 | 1 MS.Trt_vs_MS.NoTrt_B |
| TTC28    | 0.17073 | -0.5456 | 0.292 | 0.35 | 1 MS.Trt_vs_MS.NoTrt_B |
| NFIC     | 0.17081 | 1.45994 | 0.275 | 0.34 | 1 MS.Trt_vs_MS.NoTrt_B |
| NBAS     | 0.17128 | 0.83975 | 0.153 | 0.2  | 1 MS.Trt_vs_MS.NoTrt_B |
| FOXRED1  | 0.17131 | -0.2538 | 0.434 | 0.51 | 1 MS.Trt_vs_MS.NoTrt_B |
| ADORA2A  | 0.17136 | -0.2569 | 0.089 | 0.12 | 1 MS.Trt_vs_MS.NoTrt_B |
| IVNS1ABP | 0.17155 | 0.35459 | 0.251 | 0.3  | 1 MS.Trt_vs_MS.NoTrt_B |
| GPR1     | 0.1717  | 0.25325 | 0.205 | 0.16 | 1 MS.Trt_vs_MS.NoTrt_B |
| SNAPC5   | 0.17221 | 0.44615 | 0.501 | 0.57 | 1 MS.Trt_vs_MS.NoTrt_B |
| C8orf76  | 0.17227 | -0.4357 | 0.503 | 0.58 | 1 MS.Trt_vs_MS.NoTrt_B |
| ERMN     | 0.17231 | 1.19154 | 0.131 | 0.17 | 1 MS.Trt_vs_MS.NoTrt_B |
| FAM200A  | 0.17282 | 0.42586 | 0.174 | 0.22 | 1 MS.Trt_vs_MS.NoTrt_B |
| COPG1    | 0.17335 | -0.4084 | 0.109 | 0.15 | 1 MS.Trt_vs_MS.NoTrt_B |
| KIF22    | 0.17378 | 0.28678 | 0.172 | 0.22 | 1 MS.Trt_vs_MS.NoTrt_B |
| C16orf72 | 0.17379 | 0.5716  | 0.706 | 0.82 | 1 MS.Trt_vs_MS.NoTrt_B |
| OGFR     | 0.17403 | 0.33384 | 0.137 | 0.18 | 1 MS.Trt_vs_MS.NoTrt_B |
| TIMM17A  | 0.17418 | 0.44184 | 0.8   | 0.9  | 1 MS.Trt_vs_MS.NoTrt_B |
| GSN      | 0.17448 | -0.8155 | 0.453 | 0.56 | 1 MS.Trt_vs_MS.NoTrt_B |

|          |         |         |       |      |   |                      |
|----------|---------|---------|-------|------|---|----------------------|
| 9-Mar    | 0.17468 | 0.29129 | 0.455 | 0.55 | 1 | MS.Trt_vs_MS.NoTrt_B |
| FAM173B  | 0.17482 | 0.52792 | 0.126 | 0.17 | 1 | MS.Trt_vs_MS.NoTrt_B |
| CSPP1    | 0.17485 | 1.03044 | 0.32  | 0.4  | 1 | MS.Trt_vs_MS.NoTrt_B |
| ZHX1     | 0.17498 | -0.2988 | 0.492 | 0.57 | 1 | MS.Trt_vs_MS.NoTrt_B |
| SCPEP1   | 0.1755  | -0.2631 | 0.645 | 0.74 | 1 | MS.Trt_vs_MS.NoTrt_B |
| AKAP11   | 0.17609 | 0.50447 | 0.161 | 0.21 | 1 | MS.Trt_vs_MS.NoTrt_B |
| AGK      | 0.17719 | 0.47475 | 0.176 | 0.23 | 1 | MS.Trt_vs_MS.NoTrt_B |
| ZC3H15   | 0.17747 | 0.48875 | 0.187 | 0.24 | 1 | MS.Trt_vs_MS.NoTrt_B |
| RAPGEF2  | 0.17753 | 0.56587 | 0.316 | 0.38 | 1 | MS.Trt_vs_MS.NoTrt_B |
| DNPEP    | 0.17769 | -0.2793 | 0.403 | 0.47 | 1 | MS.Trt_vs_MS.NoTrt_B |
| C2       | 0.17835 | 0.33223 | 0.556 | 0.68 | 1 | MS.Trt_vs_MS.NoTrt_B |
| CCDC138  | 0.17877 | 0.93931 | 0.111 | 0.15 | 1 | MS.Trt_vs_MS.NoTrt_B |
| CCDC85C  | 0.17908 | 0.79937 | 0.316 | 0.37 | 1 | MS.Trt_vs_MS.NoTrt_B |
| ALG12    | 0.17911 | 0.51148 | 0.087 | 0.12 | 1 | MS.Trt_vs_MS.NoTrt_B |
| LEPR     | 0.17934 | 0.49723 | 0.24  | 0.3  | 1 | MS.Trt_vs_MS.NoTrt_B |
| ZC3H13   | 0.17936 | 0.45904 | 0.227 | 0.29 | 1 | MS.Trt_vs_MS.NoTrt_B |
| RAP1GDS1 | 0.17946 | 0.47627 | 0.336 | 0.42 | 1 | MS.Trt_vs_MS.NoTrt_B |
| EVI5L    | 0.1801  | -0.4658 | 0.207 | 0.27 | 1 | MS.Trt_vs_MS.NoTrt_B |
| ANKRD46  | 0.18078 | 0.56825 | 0.137 | 0.18 | 1 | MS.Trt_vs_MS.NoTrt_B |
| STAT5A   | 0.18123 | -0.5639 | 0.107 | 0.14 | 1 | MS.Trt_vs_MS.NoTrt_B |
| CHRM3    | 0.18123 | 0.4758  | 0.148 | 0.2  | 1 | MS.Trt_vs_MS.NoTrt_B |
| FAM159A  | 0.18128 | 1.12779 | 0.468 | 0.56 | 1 | MS.Trt_vs_MS.NoTrt_B |
| SMG7     | 0.18162 | 0.42629 | 0.159 | 0.21 | 1 | MS.Trt_vs_MS.NoTrt_B |
| DNAJC22  | 0.18215 | 0.25005 | 0.377 | 0.32 | 1 | MS.Trt_vs_MS.NoTrt_B |
| DCAF10   | 0.18282 | 0.48629 | 0.68  | 0.79 | 1 | MS.Trt_vs_MS.NoTrt_B |
| ADCK1    | 0.18342 | 0.30575 | 0.176 | 0.22 | 1 | MS.Trt_vs_MS.NoTrt_B |
| PPM1F    | 0.18347 | 0.86965 | 0.695 | 0.81 | 1 | MS.Trt_vs_MS.NoTrt_B |
| COASY    | 0.18379 | -0.9954 | 0.362 | 0.41 | 1 | MS.Trt_vs_MS.NoTrt_B |
| VEZT     | 0.18425 | 0.35457 | 0.593 | 0.7  | 1 | MS.Trt_vs_MS.NoTrt_B |
| LRP1     | 0.18429 | -0.3928 | 0.166 | 0.21 | 1 | MS.Trt_vs_MS.NoTrt_B |
| PDZK1    | 0.18451 | -0.5509 | 0.214 | 0.26 | 1 | MS.Trt_vs_MS.NoTrt_B |
| EFR3A    | 0.18455 | -0.3962 | 0.096 | 0.13 | 1 | MS.Trt_vs_MS.NoTrt_B |
| ZNF763   | 0.18464 | -0.6848 | 0.109 | 0.15 | 1 | MS.Trt_vs_MS.NoTrt_B |
| FAM111B  | 0.18558 | 0.30339 | 0.414 | 0.55 | 1 | MS.Trt_vs_MS.NoTrt_B |
| NCAPG2   | 0.18625 | 1.434   | 0.2   | 0.16 | 1 | MS.Trt_vs_MS.NoTrt_B |
| PIK3CG   | 0.18645 | 0.65177 | 0.183 | 0.23 | 1 | MS.Trt_vs_MS.NoTrt_B |
| GSDMA    | 0.18652 | 0.47631 | 0.497 | 0.58 | 1 | MS.Trt_vs_MS.NoTrt_B |
| GATAD2A  | 0.18654 | 0.3568  | 0.577 | 0.63 | 1 | MS.Trt_vs_MS.NoTrt_B |
| WIZ      | 0.18684 | -0.3675 | 0.22  | 0.27 | 1 | MS.Trt_vs_MS.NoTrt_B |
| GTF2H1   | 0.18728 | 0.26998 | 0.277 | 0.34 | 1 | MS.Trt_vs_MS.NoTrt_B |

|             |         |         |       |      |                        |
|-------------|---------|---------|-------|------|------------------------|
| PPM1A       | 0.18753 | -0.5111 | 0.111 | 0.15 | 1 MS.Trt_vs_MS.NoTrt_B |
| LYRM9       | 0.18785 | -0.8987 | 0.176 | 0.22 | 1 MS.Trt_vs_MS.NoTrt_B |
| FAM120A     | 0.18808 | 0.90119 | 0.129 | 0.09 | 1 MS.Trt_vs_MS.NoTrt_B |
| GDPGP1      | 0.18811 | 0.36266 | 0.841 | 0.94 | 1 MS.Trt_vs_MS.NoTrt_B |
| RASEF       | 0.18863 | 0.27756 | 0.745 | 0.96 | 1 MS.Trt_vs_MS.NoTrt_B |
| MRPL32      | 0.18877 | 0.85831 | 0.098 | 0.14 | 1 MS.Trt_vs_MS.NoTrt_B |
| MAP3K4      | 0.18917 | -0.4062 | 0.122 | 0.16 | 1 MS.Trt_vs_MS.NoTrt_B |
| NT5DC1      | 0.1892  | 0.53243 | 0.146 | 0.19 | 1 MS.Trt_vs_MS.NoTrt_B |
| PUS7        | 0.18968 | -0.6191 | 0.244 | 0.3  | 1 MS.Trt_vs_MS.NoTrt_B |
| B4GALT1     | 0.18994 | 0.25758 | 0.566 | 0.63 | 1 MS.Trt_vs_MS.NoTrt_B |
| GLS         | 0.18996 | 0.68331 | 0.556 | 0.64 | 1 MS.Trt_vs_MS.NoTrt_B |
| HID1        | 0.19002 | 1.10896 | 0.1   | 0.14 | 1 MS.Trt_vs_MS.NoTrt_B |
| STRN        | 0.19031 | 0.86715 | 0.126 | 0.17 | 1 MS.Trt_vs_MS.NoTrt_B |
| IDH1        | 0.19045 | -0.5483 | 0.146 | 0.19 | 1 MS.Trt_vs_MS.NoTrt_B |
| IRAK2       | 0.19048 | 1.00391 | 0.242 | 0.3  | 1 MS.Trt_vs_MS.NoTrt_B |
| MEGF9       | 0.19054 | 0.50076 | 0.392 | 0.44 | 1 MS.Trt_vs_MS.NoTrt_B |
| RPS6KB1     | 0.19057 | 0.51865 | 0.758 | 0.82 | 1 MS.Trt_vs_MS.NoTrt_B |
| SLC25A40    | 0.19072 | -0.4674 | 0.222 | 0.29 | 1 MS.Trt_vs_MS.NoTrt_B |
| MRPL13      | 0.19105 | 0.7866  | 0.102 | 0.14 | 1 MS.Trt_vs_MS.NoTrt_B |
| GALNT2      | 0.19113 | 0.25231 | 0.137 | 0.18 | 1 MS.Trt_vs_MS.NoTrt_B |
| SLC37A3     | 0.19143 | -0.4646 | 0.854 | 0.91 | 1 MS.Trt_vs_MS.NoTrt_B |
| HMG20A      | 0.19157 | 0.84361 | 0.222 | 0.28 | 1 MS.Trt_vs_MS.NoTrt_B |
| ATAD3C      | 0.19231 | 0.30668 | 0.741 | 0.69 | 1 MS.Trt_vs_MS.NoTrt_B |
| ZCRB1       | 0.19299 | 0.43405 | 0.142 | 0.18 | 1 MS.Trt_vs_MS.NoTrt_B |
| GTF2I       | 0.19328 | 0.51903 | 0.8   | 0.88 | 1 MS.Trt_vs_MS.NoTrt_B |
| SWAP70      | 0.19329 | -0.3043 | 0.399 | 0.48 | 1 MS.Trt_vs_MS.NoTrt_B |
| MLXIP       | 0.19386 | 0.32001 | 0.854 | 0.91 | 1 MS.Trt_vs_MS.NoTrt_B |
| ZC3H6       | 0.19419 | 0.52378 | 0.695 | 0.83 | 1 MS.Trt_vs_MS.NoTrt_B |
| ZSCAN21     | 0.19452 | 1.3538  | 0.187 | 0.15 | 1 MS.Trt_vs_MS.NoTrt_B |
| PLCD4       | 0.19482 | -0.4569 | 0.19  | 0.24 | 1 MS.Trt_vs_MS.NoTrt_B |
| C2orf42     | 0.19483 | 0.61797 | 0.072 | 0.1  | 1 MS.Trt_vs_MS.NoTrt_B |
| RAD23A      | 0.19529 | 0.28215 | 0.682 | 0.71 | 1 MS.Trt_vs_MS.NoTrt_B |
| HPCAL1      | 0.19555 | 0.6947  | 0.305 | 0.36 | 1 MS.Trt_vs_MS.NoTrt_B |
| PRKAR1A     | 0.19566 | 0.27212 | 0.207 | 0.26 | 1 MS.Trt_vs_MS.NoTrt_B |
| SCAMP1      | 0.19574 | 0.85281 | 0.399 | 0.44 | 1 MS.Trt_vs_MS.NoTrt_B |
| ZNF92       | 0.19646 | -0.6485 | 0.107 | 0.14 | 1 MS.Trt_vs_MS.NoTrt_B |
| NPC2        | 0.19676 | 0.5171  | 0.098 | 0.14 | 1 MS.Trt_vs_MS.NoTrt_B |
| RP11-9J18.1 | 0.19702 | 0.27117 | 0.17  | 0.22 | 1 MS.Trt_vs_MS.NoTrt_B |
| TTPAL       | 0.19727 | 0.63349 | 0.691 | 0.8  | 1 MS.Trt_vs_MS.NoTrt_B |
| CEP295      | 0.19733 | 0.75267 | 0.484 | 0.56 | 1 MS.Trt_vs_MS.NoTrt_B |

|           |         |         |       |      |   |                      |
|-----------|---------|---------|-------|------|---|----------------------|
| SLCO2B1   | 0.19791 | 0.48774 | 0.246 | 0.31 | 1 | MS.Trt_vs_MS.NoTrt_B |
| ATP1A3    | 0.19853 | -0.4477 | 0.255 | 0.31 | 1 | MS.Trt_vs_MS.NoTrt_B |
| FEM1A     | 0.19854 | 0.3516  | 0.867 | 0.92 | 1 | MS.Trt_vs_MS.NoTrt_B |
| OR11A1    | 0.19856 | 0.54012 | 0.183 | 0.24 | 1 | MS.Trt_vs_MS.NoTrt_B |
| TADA2B    | 0.19861 | 1.64964 | 0.24  | 0.3  | 1 | MS.Trt_vs_MS.NoTrt_B |
| ZNF280C   | 0.19941 | -0.4749 | 0.181 | 0.22 | 1 | MS.Trt_vs_MS.NoTrt_B |
| NEDD4     | 0.19966 | 0.41148 | 0.871 | 0.97 | 1 | MS.Trt_vs_MS.NoTrt_B |
| ZFP37     | 0.19975 | 0.54511 | 0.298 | 0.36 | 1 | MS.Trt_vs_MS.NoTrt_B |
| MIER2     | 0.20013 | -0.8812 | 0.39  | 0.45 | 1 | MS.Trt_vs_MS.NoTrt_B |
| PPP2R2A   | 0.2003  | 0.98451 | 0.107 | 0.14 | 1 | MS.Trt_vs_MS.NoTrt_B |
| ZNF264    | 0.20036 | 0.28586 | 0.854 | 0.91 | 1 | MS.Trt_vs_MS.NoTrt_B |
| C2CD2     | 0.20081 | 0.84243 | 0.159 | 0.21 | 1 | MS.Trt_vs_MS.NoTrt_B |
| VPS18     | 0.20097 | -0.8137 | 0.174 | 0.21 | 1 | MS.Trt_vs_MS.NoTrt_B |
| AGAP6     | 0.20168 | 1.54113 | 0.089 | 0.12 | 1 | MS.Trt_vs_MS.NoTrt_B |
| RNF168    | 0.20175 | 0.49508 | 0.475 | 0.57 | 1 | MS.Trt_vs_MS.NoTrt_B |
| EIF5A     | 0.20225 | 1.11836 | 0.61  | 0.67 | 1 | MS.Trt_vs_MS.NoTrt_B |
| LIPT2     | 0.2024  | -0.7268 | 0.092 | 0.12 | 1 | MS.Trt_vs_MS.NoTrt_B |
| CREBL2    | 0.20261 | 0.61942 | 0.072 | 0.1  | 1 | MS.Trt_vs_MS.NoTrt_B |
| UQCRC1    | 0.2033  | 0.47066 | 0.214 | 0.27 | 1 | MS.Trt_vs_MS.NoTrt_B |
| TBC1D23   | 0.20355 | 0.39412 | 0.092 | 0.12 | 1 | MS.Trt_vs_MS.NoTrt_B |
| CPNE8     | 0.2036  | 1.35965 | 0.109 | 0.08 | 1 | MS.Trt_vs_MS.NoTrt_B |
| MYO6      | 0.20361 | 1.64721 | 0.373 | 0.45 | 1 | MS.Trt_vs_MS.NoTrt_B |
| DENND2D   | 0.2037  | 0.49618 | 0.322 | 0.28 | 1 | MS.Trt_vs_MS.NoTrt_B |
| MAN1C1    | 0.20412 | 0.84842 | 0.83  | 0.85 | 1 | MS.Trt_vs_MS.NoTrt_B |
| RBM7      | 0.20415 | 1.05648 | 0.601 | 0.67 | 1 | MS.Trt_vs_MS.NoTrt_B |
| TRIM34    | 0.20422 | -0.2653 | 0.246 | 0.3  | 1 | MS.Trt_vs_MS.NoTrt_B |
| STAG2     | 0.20428 | 0.47612 | 0.671 | 0.73 | 1 | MS.Trt_vs_MS.NoTrt_B |
| CLDN11    | 0.20473 | 0.49123 | 0.512 | 0.47 | 1 | MS.Trt_vs_MS.NoTrt_B |
| SFXN2     | 0.20486 | 0.38443 | 0.871 | 0.9  | 1 | MS.Trt_vs_MS.NoTrt_B |
| GLUD1     | 0.20493 | 0.5377  | 0.124 | 0.16 | 1 | MS.Trt_vs_MS.NoTrt_B |
| LINC00959 | 0.20531 | -0.941  | 0.083 | 0.11 | 1 | MS.Trt_vs_MS.NoTrt_B |
| SPATS2L   | 0.20541 | -0.2991 | 0.856 | 0.92 | 1 | MS.Trt_vs_MS.NoTrt_B |
| USO1      | 0.20572 | 0.50707 | 0.102 | 0.14 | 1 | MS.Trt_vs_MS.NoTrt_B |
| PRKRA     | 0.2059  | 0.63964 | 0.196 | 0.24 | 1 | MS.Trt_vs_MS.NoTrt_B |
| UPK1B     | 0.2061  | 0.39634 | 0.412 | 0.37 | 1 | MS.Trt_vs_MS.NoTrt_B |
| CAMKMT    | 0.20623 | 0.63175 | 0.231 | 0.28 | 1 | MS.Trt_vs_MS.NoTrt_B |
| TRABD2A   | 0.20624 | 0.25758 | 0.741 | 0.79 | 1 | MS.Trt_vs_MS.NoTrt_B |
| LSR       | 0.20651 | -0.6796 | 0.133 | 0.17 | 1 | MS.Trt_vs_MS.NoTrt_B |
| ZNF37A    | 0.20695 | 0.40093 | 0.749 | 0.85 | 1 | MS.Trt_vs_MS.NoTrt_B |
| NANP      | 0.20697 | -0.7252 | 0.244 | 0.3  | 1 | MS.Trt_vs_MS.NoTrt_B |

|           |         |         |       |      |                        |
|-----------|---------|---------|-------|------|------------------------|
| ITGA2B    | 0.20762 | 0.31365 | 0.312 | 0.27 | 1 MS.Trt_vs_MS.NoTrt_B |
| NOP16     | 0.20764 | 0.27463 | 0.15  | 0.2  | 1 MS.Trt_vs_MS.NoTrt_B |
| UEVLD     | 0.20766 | -0.274  | 0.828 | 0.9  | 1 MS.Trt_vs_MS.NoTrt_B |
| INCA1     | 0.20786 | 0.27999 | 0.157 | 0.21 | 1 MS.Trt_vs_MS.NoTrt_B |
| METTTL25  | 0.20843 | 0.72804 | 0.124 | 0.16 | 1 MS.Trt_vs_MS.NoTrt_B |
| ZNF12     | 0.20898 | -0.9904 | 0.237 | 0.28 | 1 MS.Trt_vs_MS.NoTrt_B |
| ZNF407    | 0.20934 | 1.02852 | 0.076 | 0.11 | 1 MS.Trt_vs_MS.NoTrt_B |
| TAF8      | 0.21012 | -0.283  | 0.882 | 0.96 | 1 MS.Trt_vs_MS.NoTrt_B |
| TMEM127   | 0.21052 | 0.2524  | 0.571 | 0.63 | 1 MS.Trt_vs_MS.NoTrt_B |
| ACACB     | 0.21055 | 0.61003 | 0.828 | 0.94 | 1 MS.Trt_vs_MS.NoTrt_B |
| LPCAT3    | 0.21066 | -0.9599 | 0.392 | 0.41 | 1 MS.Trt_vs_MS.NoTrt_B |
| NIT1      | 0.21069 | -0.6789 | 0.471 | 0.56 | 1 MS.Trt_vs_MS.NoTrt_B |
| DOK6      | 0.21136 | -0.3543 | 0.146 | 0.19 | 1 MS.Trt_vs_MS.NoTrt_B |
| PHTF1     | 0.21155 | 0.39036 | 0.397 | 0.45 | 1 MS.Trt_vs_MS.NoTrt_B |
| HIST1H2AG | 0.21169 | 0.52814 | 0.279 | 0.34 | 1 MS.Trt_vs_MS.NoTrt_B |
| BCR       | 0.21183 | 0.48223 | 0.216 | 0.27 | 1 MS.Trt_vs_MS.NoTrt_B |
| ZP3       | 0.21197 | 0.41229 | 0.512 | 0.61 | 1 MS.Trt_vs_MS.NoTrt_B |
| ASPH      | 0.21233 | -0.3052 | 0.351 | 0.44 | 1 MS.Trt_vs_MS.NoTrt_B |
| MAML1     | 0.21247 | -0.2576 | 0.098 | 0.13 | 1 MS.Trt_vs_MS.NoTrt_B |
| TRIM39    | 0.21272 | -0.3255 | 0.089 | 0.12 | 1 MS.Trt_vs_MS.NoTrt_B |
| RNF144B   | 0.2128  | 0.4858  | 0.248 | 0.31 | 1 MS.Trt_vs_MS.NoTrt_B |
| DGKZ      | 0.21311 | 0.38788 | 0.407 | 0.46 | 1 MS.Trt_vs_MS.NoTrt_B |
| WDR77     | 0.21326 | 0.35672 | 0.092 | 0.12 | 1 MS.Trt_vs_MS.NoTrt_B |
| GMPR      | 0.21335 | 0.67024 | 0.322 | 0.41 | 1 MS.Trt_vs_MS.NoTrt_B |
| MFSD4A    | 0.21343 | 1.05951 | 0.423 | 0.48 | 1 MS.Trt_vs_MS.NoTrt_B |
| BET1L     | 0.21349 | 0.31184 | 0.157 | 0.2  | 1 MS.Trt_vs_MS.NoTrt_B |
| MTHFR     | 0.2135  | 0.34969 | 0.699 | 0.84 | 1 MS.Trt_vs_MS.NoTrt_B |
| ZNF845    | 0.21462 | 0.45968 | 0.514 | 0.6  | 1 MS.Trt_vs_MS.NoTrt_B |
| RBMS3     | 0.21498 | 0.53    | 0.562 | 0.67 | 1 MS.Trt_vs_MS.NoTrt_B |
| BEST1     | 0.21503 | 0.33259 | 0.708 | 0.8  | 1 MS.Trt_vs_MS.NoTrt_B |
| TEFM      | 0.21528 | 0.58204 | 0.595 | 0.7  | 1 MS.Trt_vs_MS.NoTrt_B |
| SYTL2     | 0.21549 | 0.48411 | 0.736 | 0.8  | 1 MS.Trt_vs_MS.NoTrt_B |
| HNRNPM    | 0.21567 | 0.3753  | 0.242 | 0.3  | 1 MS.Trt_vs_MS.NoTrt_B |
| ACOT4     | 0.21601 | -1.428  | 0.092 | 0.12 | 1 MS.Trt_vs_MS.NoTrt_B |
| DNAJA4    | 0.21624 | 1.6615  | 0.076 | 0.11 | 1 MS.Trt_vs_MS.NoTrt_B |
| VPS50     | 0.21658 | 0.30511 | 0.473 | 0.54 | 1 MS.Trt_vs_MS.NoTrt_B |
| ZDHHC14   | 0.21689 | 0.43669 | 0.27  | 0.32 | 1 MS.Trt_vs_MS.NoTrt_B |
| KLHL11    | 0.21694 | -0.2832 | 0.405 | 0.46 | 1 MS.Trt_vs_MS.NoTrt_B |
| ENDOV     | 0.21712 | 0.48768 | 0.484 | 0.54 | 1 MS.Trt_vs_MS.NoTrt_B |
| PTPRC     | 0.21723 | 0.48757 | 0.876 | 0.98 | 1 MS.Trt_vs_MS.NoTrt_B |

|          |         |         |       |      |                        |
|----------|---------|---------|-------|------|------------------------|
| AMFR     | 0.21742 | -0.841  | 0.503 | 0.42 | 1 MS.Trt_vs_MS.NoTrt_B |
| CD160    | 0.21761 | 0.64058 | 0.214 | 0.27 | 1 MS.Trt_vs_MS.NoTrt_B |
| TSEN34   | 0.21798 | 0.28424 | 0.094 | 0.12 | 1 MS.Trt_vs_MS.NoTrt_B |
| ABCC4    | 0.21916 | 0.76431 | 0.58  | 0.75 | 1 MS.Trt_vs_MS.NoTrt_B |
| DDX47    | 0.21949 | 0.6712  | 0.41  | 0.47 | 1 MS.Trt_vs_MS.NoTrt_B |
| APC      | 0.21979 | 0.41569 | 0.416 | 0.46 | 1 MS.Trt_vs_MS.NoTrt_B |
| EMC7     | 0.22    | 0.38523 | 0.148 | 0.19 | 1 MS.Trt_vs_MS.NoTrt_B |
| PCGF6    | 0.22019 | 0.35837 | 0.59  | 0.75 | 1 MS.Trt_vs_MS.NoTrt_B |
| UNKL     | 0.22046 | 0.42019 | 0.353 | 0.4  | 1 MS.Trt_vs_MS.NoTrt_B |
| PPIL3    | 0.22062 | 0.27031 | 0.643 | 0.78 | 1 MS.Trt_vs_MS.NoTrt_B |
| LAYN     | 0.22066 | 0.99569 | 0.166 | 0.21 | 1 MS.Trt_vs_MS.NoTrt_B |
| KIAA1468 | 0.22149 | 0.52404 | 0.227 | 0.27 | 1 MS.Trt_vs_MS.NoTrt_B |
| RBMS1    | 0.22165 | 0.58624 | 0.505 | 0.61 | 1 MS.Trt_vs_MS.NoTrt_B |
| MACF1    | 0.2218  | 0.74319 | 0.789 | 0.84 | 1 MS.Trt_vs_MS.NoTrt_B |
| FYN      | 0.22187 | 0.44077 | 0.451 | 0.54 | 1 MS.Trt_vs_MS.NoTrt_B |
| PRR23C   | 0.22279 | 0.29413 | 0.338 | 0.42 | 1 MS.Trt_vs_MS.NoTrt_B |
| SLK      | 0.22322 | 0.49495 | 0.115 | 0.15 | 1 MS.Trt_vs_MS.NoTrt_B |
| UNC13C   | 0.22335 | 0.30926 | 0.479 | 0.62 | 1 MS.Trt_vs_MS.NoTrt_B |
| USP6NL   | 0.22461 | 0.67643 | 0.667 | 0.82 | 1 MS.Trt_vs_MS.NoTrt_B |
| CKS1B    | 0.22476 | 0.86709 | 0.15  | 0.19 | 1 MS.Trt_vs_MS.NoTrt_B |
| PI16     | 0.22509 | -0.3714 | 0.133 | 0.17 | 1 MS.Trt_vs_MS.NoTrt_B |
| DNAJC3   | 0.22524 | 0.91838 | 0.42  | 0.5  | 1 MS.Trt_vs_MS.NoTrt_B |
| PRKRIP1  | 0.22532 | 0.75889 | 0.074 | 0.1  | 1 MS.Trt_vs_MS.NoTrt_B |
| TTC3     | 0.22564 | 0.49126 | 0.645 | 0.73 | 1 MS.Trt_vs_MS.NoTrt_B |
| SPN      | 0.22601 | -0.3327 | 0.932 | 0.98 | 1 MS.Trt_vs_MS.NoTrt_B |
| ZNF518A  | 0.22604 | 0.27592 | 0.092 | 0.12 | 1 MS.Trt_vs_MS.NoTrt_B |
| PPP1R1C  | 0.22614 | 0.26579 | 0.203 | 0.25 | 1 MS.Trt_vs_MS.NoTrt_B |
| SLC25A30 | 0.22628 | 0.28992 | 0.51  | 0.57 | 1 MS.Trt_vs_MS.NoTrt_B |
| SIRT1    | 0.22665 | 1.01052 | 0.074 | 0.1  | 1 MS.Trt_vs_MS.NoTrt_B |
| RABEP1   | 0.22715 | 0.57883 | 0.148 | 0.2  | 1 MS.Trt_vs_MS.NoTrt_B |
| LPAR6    | 0.22717 | 0.62051 | 0.338 | 0.38 | 1 MS.Trt_vs_MS.NoTrt_B |
| MIGA1    | 0.22719 | 0.62338 | 0.377 | 0.45 | 1 MS.Trt_vs_MS.NoTrt_B |
| POLR2B   | 0.22741 | 0.44738 | 0.438 | 0.48 | 1 MS.Trt_vs_MS.NoTrt_B |
| C16orf45 | 0.22754 | 0.50955 | 0.146 | 0.18 | 1 MS.Trt_vs_MS.NoTrt_B |
| TNFSF13B | 0.2276  | 0.46621 | 0.449 | 0.52 | 1 MS.Trt_vs_MS.NoTrt_B |
| TBC1D3I  | 0.22871 | -0.3156 | 0.157 | 0.2  | 1 MS.Trt_vs_MS.NoTrt_B |
| MTFR1    | 0.22953 | 0.37363 | 0.111 | 0.15 | 1 MS.Trt_vs_MS.NoTrt_B |
| MCMBP    | 0.22974 | 1.22233 | 0.355 | 0.41 | 1 MS.Trt_vs_MS.NoTrt_B |
| ADAMTS16 | 0.23002 | 0.34757 | 0.222 | 0.29 | 1 MS.Trt_vs_MS.NoTrt_B |
| ZNF316   | 0.23019 | 1.08545 | 0.427 | 0.38 | 1 MS.Trt_vs_MS.NoTrt_B |

|            |         |         |       |      |                        |
|------------|---------|---------|-------|------|------------------------|
| CHST3      | 0.23021 | -0.4167 | 0.118 | 0.16 | 1 MS.Trt_vs_MS.NoTrt_B |
| DHX37      | 0.23064 | -0.4431 | 0.349 | 0.41 | 1 MS.Trt_vs_MS.NoTrt_B |
| SKP2       | 0.23133 | 0.34541 | 0.41  | 0.47 | 1 MS.Trt_vs_MS.NoTrt_B |
| MORC3      | 0.23186 | 0.63747 | 0.403 | 0.44 | 1 MS.Trt_vs_MS.NoTrt_B |
| FLOT1      | 0.23228 | 0.66515 | 0.12  | 0.09 | 1 MS.Trt_vs_MS.NoTrt_B |
| IBA57      | 0.23284 | 1.12879 | 0.647 | 0.73 | 1 MS.Trt_vs_MS.NoTrt_B |
| TMEM104    | 0.23373 | 0.35431 | 0.107 | 0.14 | 1 MS.Trt_vs_MS.NoTrt_B |
| TNS2       | 0.23382 | 0.25392 | 0.257 | 0.31 | 1 MS.Trt_vs_MS.NoTrt_B |
| SAP130     | 0.23392 | 0.66508 | 0.118 | 0.16 | 1 MS.Trt_vs_MS.NoTrt_B |
| TMEM11     | 0.23403 | -0.2957 | 0.085 | 0.11 | 1 MS.Trt_vs_MS.NoTrt_B |
| RNF13      | 0.23444 | 0.79226 | 0.131 | 0.17 | 1 MS.Trt_vs_MS.NoTrt_B |
| AP3M1      | 0.23525 | -0.3562 | 0.407 | 0.44 | 1 MS.Trt_vs_MS.NoTrt_B |
| TRIM61     | 0.23534 | -0.6524 | 0.174 | 0.21 | 1 MS.Trt_vs_MS.NoTrt_B |
| AGO4       | 0.23631 | -0.5483 | 0.24  | 0.28 | 1 MS.Trt_vs_MS.NoTrt_B |
| TLE2       | 0.23638 | 0.76969 | 0.375 | 0.44 | 1 MS.Trt_vs_MS.NoTrt_B |
| ERBB3      | 0.23705 | -0.4448 | 0.654 | 0.68 | 1 MS.Trt_vs_MS.NoTrt_B |
| UGT1A1     | 0.2373  | 0.39819 | 0.473 | 0.57 | 1 MS.Trt_vs_MS.NoTrt_B |
| DNAH2      | 0.23764 | 0.33372 | 0.51  | 0.63 | 1 MS.Trt_vs_MS.NoTrt_B |
| DEDD       | 0.23799 | 0.32035 | 0.135 | 0.17 | 1 MS.Trt_vs_MS.NoTrt_B |
| APOBR      | 0.238   | 1.3632  | 0.083 | 0.11 | 1 MS.Trt_vs_MS.NoTrt_B |
| C11orf54   | 0.23828 | 0.3656  | 0.732 | 0.76 | 1 MS.Trt_vs_MS.NoTrt_B |
| KIAA1210   | 0.23907 | -0.3061 | 0.198 | 0.23 | 1 MS.Trt_vs_MS.NoTrt_B |
| KIF20B     | 0.23916 | 0.55811 | 0.111 | 0.15 | 1 MS.Trt_vs_MS.NoTrt_B |
| IFITM1     | 0.23919 | 0.28173 | 0.54  | 0.63 | 1 MS.Trt_vs_MS.NoTrt_B |
| AHI1       | 0.24012 | 0.38957 | 0.27  | 0.32 | 1 MS.Trt_vs_MS.NoTrt_B |
| RP11-111M1 | 0.24042 | 0.27456 | 0.778 | 0.88 | 1 MS.Trt_vs_MS.NoTrt_B |
| GPR108     | 0.24047 | 0.55429 | 0.157 | 0.2  | 1 MS.Trt_vs_MS.NoTrt_B |
| RAB43      | 0.24085 | 0.40069 | 0.157 | 0.2  | 1 MS.Trt_vs_MS.NoTrt_B |
| TMEM185A   | 0.24262 | 0.86757 | 0.386 | 0.46 | 1 MS.Trt_vs_MS.NoTrt_B |
| GFOD1      | 0.24319 | -0.3365 | 0.497 | 0.53 | 1 MS.Trt_vs_MS.NoTrt_B |
| NECAP2     | 0.24446 | 0.30739 | 0.399 | 0.47 | 1 MS.Trt_vs_MS.NoTrt_B |
| MSMO1      | 0.24479 | 0.47024 | 0.442 | 0.52 | 1 MS.Trt_vs_MS.NoTrt_B |
| SLC31A2    | 0.24488 | -0.4812 | 0.085 | 0.11 | 1 MS.Trt_vs_MS.NoTrt_B |
| SERPINB9   | 0.2453  | 0.61293 | 0.693 | 0.8  | 1 MS.Trt_vs_MS.NoTrt_B |
| RWDD2A     | 0.24587 | -0.5969 | 0.349 | 0.41 | 1 MS.Trt_vs_MS.NoTrt_B |
| TMA7       | 0.2459  | 0.76557 | 0.527 | 0.73 | 1 MS.Trt_vs_MS.NoTrt_B |
| ZNF532     | 0.24623 | -0.2787 | 0.874 | 0.96 | 1 MS.Trt_vs_MS.NoTrt_B |
| CD163      | 0.24732 | 0.36148 | 0.562 | 0.74 | 1 MS.Trt_vs_MS.NoTrt_B |
| TMEM216    | 0.24734 | 0.45916 | 0.288 | 0.34 | 1 MS.Trt_vs_MS.NoTrt_B |
| CD24       | 0.24735 | 0.26504 | 0.253 | 0.3  | 1 MS.Trt_vs_MS.NoTrt_B |



|            |         |         |       |      |                        |
|------------|---------|---------|-------|------|------------------------|
| DGCR8      | 0.24776 | -0.7752 | 0.081 | 0.11 | 1 MS.Trt_vs_MS.NoTrt_B |
| TP53       | 0.24782 | 0.54775 | 0.741 | 0.84 | 1 MS.Trt_vs_MS.NoTrt_B |
| AXIN1      | 0.24828 | 0.52645 | 0.074 | 0.1  | 1 MS.Trt_vs_MS.NoTrt_B |
| KMT5B      | 0.2491  | -0.4867 | 0.205 | 0.24 | 1 MS.Trt_vs_MS.NoTrt_B |
| MALT1      | 0.24963 | 0.34794 | 0.078 | 0.11 | 1 MS.Trt_vs_MS.NoTrt_B |
| CD69       | 0.24979 | 0.28913 | 0.148 | 0.18 | 1 MS.Trt_vs_MS.NoTrt_B |
| ENPP3      | 0.24983 | 0.43467 | 0.098 | 0.13 | 1 MS.Trt_vs_MS.NoTrt_B |
| BIN3       | 0.24984 | 0.57821 | 0.301 | 0.37 | 1 MS.Trt_vs_MS.NoTrt_B |
| SCLY       | 0.24994 | 0.4005  | 0.885 | 0.96 | 1 MS.Trt_vs_MS.NoTrt_B |
| LCOR       | 0.2501  | 0.35693 | 0.322 | 0.37 | 1 MS.Trt_vs_MS.NoTrt_B |
| CLIP2      | 0.25038 | 0.45981 | 0.255 | 0.32 | 1 MS.Trt_vs_MS.NoTrt_B |
| WNK3       | 0.25157 | 0.85963 | 0.222 | 0.27 | 1 MS.Trt_vs_MS.NoTrt_B |
| TELO2      | 0.2516  | 0.33164 | 0.078 | 0.11 | 1 MS.Trt_vs_MS.NoTrt_B |
| CRNKL1     | 0.25167 | -0.3255 | 0.081 | 0.11 | 1 MS.Trt_vs_MS.NoTrt_B |
| PGD        | 0.25172 | -0.2996 | 0.1   | 0.13 | 1 MS.Trt_vs_MS.NoTrt_B |
| CDC73      | 0.25235 | 0.73703 | 0.473 | 0.54 | 1 MS.Trt_vs_MS.NoTrt_B |
| CREBZF     | 0.25337 | 0.63803 | 0.153 | 0.19 | 1 MS.Trt_vs_MS.NoTrt_B |
| NOG        | 0.25398 | 2.1113  | 0.216 | 0.19 | 1 MS.Trt_vs_MS.NoTrt_B |
| ELF4       | 0.25484 | 0.54624 | 0.111 | 0.15 | 1 MS.Trt_vs_MS.NoTrt_B |
| ARFGAP1    | 0.25495 | -0.2678 | 0.092 | 0.12 | 1 MS.Trt_vs_MS.NoTrt_B |
| MFSD9      | 0.25575 | -1.0135 | 0.418 | 0.47 | 1 MS.Trt_vs_MS.NoTrt_B |
| HSPG2      | 0.25584 | -0.7849 | 0.307 | 0.26 | 1 MS.Trt_vs_MS.NoTrt_B |
| F5         | 0.25645 | 0.49404 | 0.192 | 0.24 | 1 MS.Trt_vs_MS.NoTrt_B |
| OVCA2      | 0.25677 | 0.61636 | 0.092 | 0.12 | 1 MS.Trt_vs_MS.NoTrt_B |
| PARP2      | 0.25683 | -0.2602 | 0.292 | 0.34 | 1 MS.Trt_vs_MS.NoTrt_B |
| HTN3       | 0.25761 | 0.35096 | 0.486 | 0.58 | 1 MS.Trt_vs_MS.NoTrt_B |
| 6-Mar      | 0.25786 | 0.75458 | 0.732 | 0.85 | 1 MS.Trt_vs_MS.NoTrt_B |
| CD47       | 0.25824 | 0.56556 | 0.854 | 0.91 | 1 MS.Trt_vs_MS.NoTrt_B |
| ZSWIM7     | 0.25827 | 0.32227 | 0.682 | 0.76 | 1 MS.Trt_vs_MS.NoTrt_B |
| CAMK1      | 0.25882 | 0.37011 | 0.475 | 0.56 | 1 MS.Trt_vs_MS.NoTrt_B |
| SEC62      | 0.25981 | 0.50728 | 0.379 | 0.44 | 1 MS.Trt_vs_MS.NoTrt_B |
| CTD-2006C1 | 0.26062 | -0.3571 | 0.22  | 0.26 | 1 MS.Trt_vs_MS.NoTrt_B |
| CCDC90B    | 0.26104 | 0.35204 | 0.865 | 0.97 | 1 MS.Trt_vs_MS.NoTrt_B |
| LCAT       | 0.26134 | 0.30177 | 0.157 | 0.2  | 1 MS.Trt_vs_MS.NoTrt_B |
| TMEM259    | 0.26203 | 0.56309 | 0.081 | 0.11 | 1 MS.Trt_vs_MS.NoTrt_B |
| RP1L1      | 0.26246 | 0.25358 | 0.597 | 0.52 | 1 MS.Trt_vs_MS.NoTrt_B |
| IFT74      | 0.2626  | 0.47001 | 0.314 | 0.36 | 1 MS.Trt_vs_MS.NoTrt_B |
| CALD1      | 0.26361 | -0.9368 | 0.139 | 0.18 | 1 MS.Trt_vs_MS.NoTrt_B |
| U2AF2      | 0.26467 | 0.25065 | 0.133 | 0.17 | 1 MS.Trt_vs_MS.NoTrt_B |
| RAB5A      | 0.26524 | 0.86196 | 0.109 | 0.14 | 1 MS.Trt_vs_MS.NoTrt_B |

|          |         |         |       |      |                        |
|----------|---------|---------|-------|------|------------------------|
| CHD7     | 0.26545 | 2.36033 | 0.397 | 0.51 | 1 MS.Trt_vs_MS.NoTrt_B |
| SDHB     | 0.26572 | 0.73301 | 0.12  | 0.16 | 1 MS.Trt_vs_MS.NoTrt_B |
| PRDX2    | 0.26623 | 0.36098 | 0.216 | 0.26 | 1 MS.Trt_vs_MS.NoTrt_B |
| CPNE3    | 0.26651 | 0.36043 | 0.196 | 0.23 | 1 MS.Trt_vs_MS.NoTrt_B |
| TBPL1    | 0.26661 | 0.74238 | 0.179 | 0.22 | 1 MS.Trt_vs_MS.NoTrt_B |
| NBPF3    | 0.26677 | 0.85191 | 0.377 | 0.44 | 1 MS.Trt_vs_MS.NoTrt_B |
| RPUSD3   | 0.26757 | 0.31585 | 0.695 | 0.77 | 1 MS.Trt_vs_MS.NoTrt_B |
| C9orf85  | 0.26781 | 0.28013 | 0.797 | 0.84 | 1 MS.Trt_vs_MS.NoTrt_B |
| ARF3     | 0.26782 | 0.27448 | 0.126 | 0.16 | 1 MS.Trt_vs_MS.NoTrt_B |
| TRAF3IP1 | 0.26817 | 0.40123 | 0.292 | 0.35 | 1 MS.Trt_vs_MS.NoTrt_B |
| MRPS30   | 0.26817 | 0.66528 | 0.259 | 0.32 | 1 MS.Trt_vs_MS.NoTrt_B |
| AFMID    | 0.26935 | 0.28971 | 0.869 | 0.9  | 1 MS.Trt_vs_MS.NoTrt_B |
| SMN2     | 0.26955 | 0.73239 | 0.804 | 0.7  | 1 MS.Trt_vs_MS.NoTrt_B |
| TAF6     | 0.26962 | -0.4378 | 0.473 | 0.54 | 1 MS.Trt_vs_MS.NoTrt_B |
| NDRG4    | 0.26988 | 0.34998 | 0.105 | 0.14 | 1 MS.Trt_vs_MS.NoTrt_B |
| MEGF8    | 0.27013 | 0.54587 | 0.318 | 0.38 | 1 MS.Trt_vs_MS.NoTrt_B |
| ZNF133   | 0.27027 | -1.1438 | 0.344 | 0.41 | 1 MS.Trt_vs_MS.NoTrt_B |
| SLF2     | 0.27031 | 0.308   | 0.434 | 0.49 | 1 MS.Trt_vs_MS.NoTrt_B |
| FAM69A   | 0.27129 | 0.97751 | 0.094 | 0.12 | 1 MS.Trt_vs_MS.NoTrt_B |
| CHM      | 0.27133 | 0.53178 | 0.41  | 0.44 | 1 MS.Trt_vs_MS.NoTrt_B |
| H6PD     | 0.27234 | 0.86174 | 0.684 | 0.83 | 1 MS.Trt_vs_MS.NoTrt_B |
| ZMYM1    | 0.27386 | 0.54037 | 0.453 | 0.51 | 1 MS.Trt_vs_MS.NoTrt_B |
| SRRD     | 0.27398 | 0.48769 | 0.322 | 0.4  | 1 MS.Trt_vs_MS.NoTrt_B |
| UBR5     | 0.27403 | 0.35991 | 0.697 | 0.81 | 1 MS.Trt_vs_MS.NoTrt_B |
| FGFR4    | 0.2742  | 0.25535 | 0.312 | 0.36 | 1 MS.Trt_vs_MS.NoTrt_B |
| CFAP36   | 0.27506 | 0.45454 | 0.322 | 0.38 | 1 MS.Trt_vs_MS.NoTrt_B |
| LARP7    | 0.27563 | 0.8535  | 0.185 | 0.23 | 1 MS.Trt_vs_MS.NoTrt_B |
| GPAA1    | 0.27602 | 0.45538 | 0.131 | 0.17 | 1 MS.Trt_vs_MS.NoTrt_B |
| UTP14C   | 0.27617 | 0.35557 | 0.133 | 0.17 | 1 MS.Trt_vs_MS.NoTrt_B |
| NLK      | 0.27631 | 1.02182 | 0.231 | 0.27 | 1 MS.Trt_vs_MS.NoTrt_B |
| SETD4    | 0.27637 | 0.6775  | 0.423 | 0.48 | 1 MS.Trt_vs_MS.NoTrt_B |
| PALLD    | 0.27695 | -0.5339 | 0.257 | 0.3  | 1 MS.Trt_vs_MS.NoTrt_B |
| BLOC1S5  | 0.27704 | 0.34236 | 0.523 | 0.63 | 1 MS.Trt_vs_MS.NoTrt_B |
| FAM134A  | 0.27707 | 0.71425 | 0.386 | 0.44 | 1 MS.Trt_vs_MS.NoTrt_B |
| MT-ATP6  | 0.27715 | 0.28695 | 0.797 | 0.93 | 1 MS.Trt_vs_MS.NoTrt_B |
| APOL1    | 0.27716 | 0.29023 | 0.588 | 0.65 | 1 MS.Trt_vs_MS.NoTrt_B |
| HOOK2    | 0.27721 | 0.43745 | 0.911 | 0.96 | 1 MS.Trt_vs_MS.NoTrt_B |
| CHP1     | 0.27724 | 0.72516 | 0.675 | 0.77 | 1 MS.Trt_vs_MS.NoTrt_B |
| PITPNB   | 0.27764 | 0.6346  | 0.166 | 0.21 | 1 MS.Trt_vs_MS.NoTrt_B |
| IFI44L   | 0.27851 | -0.5344 | 0.133 | 0.16 | 1 MS.Trt_vs_MS.NoTrt_B |

|          |         |         |       |      |                        |
|----------|---------|---------|-------|------|------------------------|
| SLC9A6   | 0.27865 | 0.44696 | 0.294 | 0.34 | 1 MS.Trt_vs_MS.NoTrt_B |
| MEMO1    | 0.27904 | 0.53761 | 0.27  | 0.3  | 1 MS.Trt_vs_MS.NoTrt_B |
| GNB1L    | 0.27914 | 0.4471  | 0.15  | 0.18 | 1 MS.Trt_vs_MS.NoTrt_B |
| GOLPH3   | 0.27928 | 0.30008 | 0.124 | 0.16 | 1 MS.Trt_vs_MS.NoTrt_B |
| FLNB     | 0.27933 | -0.5031 | 0.41  | 0.47 | 1 MS.Trt_vs_MS.NoTrt_B |
| PIPOX    | 0.27948 | 0.31879 | 0.451 | 0.52 | 1 MS.Trt_vs_MS.NoTrt_B |
| SIM1     | 0.28034 | 0.67073 | 0.148 | 0.18 | 1 MS.Trt_vs_MS.NoTrt_B |
| LRP8     | 0.28038 | 0.41559 | 0.381 | 0.47 | 1 MS.Trt_vs_MS.NoTrt_B |
| FIGNL1   | 0.28042 | -0.8171 | 0.105 | 0.14 | 1 MS.Trt_vs_MS.NoTrt_B |
| DUSP7    | 0.2806  | 0.25438 | 0.087 | 0.11 | 1 MS.Trt_vs_MS.NoTrt_B |
| ZNF625   | 0.28087 | -0.3046 | 0.216 | 0.25 | 1 MS.Trt_vs_MS.NoTrt_B |
| CD3EAP   | 0.28094 | 0.50793 | 0.784 | 0.71 | 1 MS.Trt_vs_MS.NoTrt_B |
| PSMG1    | 0.28129 | 0.52078 | 0.113 | 0.15 | 1 MS.Trt_vs_MS.NoTrt_B |
| NOP2     | 0.28231 | 0.63386 | 0.331 | 0.38 | 1 MS.Trt_vs_MS.NoTrt_B |
| KLHL9    | 0.28299 | 0.92786 | 0.277 | 0.34 | 1 MS.Trt_vs_MS.NoTrt_B |
| AGPAT1   | 0.28361 | -0.2648 | 0.083 | 0.11 | 1 MS.Trt_vs_MS.NoTrt_B |
| SLC39A11 | 0.28369 | 0.65938 | 0.209 | 0.25 | 1 MS.Trt_vs_MS.NoTrt_B |
| CYC1     | 0.28429 | 0.49935 | 0.113 | 0.15 | 1 MS.Trt_vs_MS.NoTrt_B |
| TCEB3    | 0.28606 | 0.68448 | 0.076 | 0.1  | 1 MS.Trt_vs_MS.NoTrt_B |
| TMSB15B  | 0.28631 | -0.4326 | 0.22  | 0.27 | 1 MS.Trt_vs_MS.NoTrt_B |
| EXOSC6   | 0.28736 | 0.4349  | 0.815 | 0.88 | 1 MS.Trt_vs_MS.NoTrt_B |
| NSUN5    | 0.28807 | 1.33203 | 0.279 | 0.35 | 1 MS.Trt_vs_MS.NoTrt_B |
| CTRL     | 0.28811 | 0.49693 | 0.096 | 0.12 | 1 MS.Trt_vs_MS.NoTrt_B |
| PSMD1    | 0.29048 | 0.32001 | 0.15  | 0.18 | 1 MS.Trt_vs_MS.NoTrt_B |
| GGT1     | 0.29061 | -0.7112 | 0.083 | 0.11 | 1 MS.Trt_vs_MS.NoTrt_B |
| FUK      | 0.29145 | -0.3411 | 0.434 | 0.49 | 1 MS.Trt_vs_MS.NoTrt_B |
| ZNF302   | 0.29166 | 0.76205 | 0.418 | 0.35 | 1 MS.Trt_vs_MS.NoTrt_B |
| PIGW     | 0.29222 | -0.5453 | 0.41  | 0.38 | 1 MS.Trt_vs_MS.NoTrt_B |
| ZNF708   | 0.29224 | 0.72607 | 0.68  | 0.75 | 1 MS.Trt_vs_MS.NoTrt_B |
| HAVCR2   | 0.29382 | 0.5387  | 0.429 | 0.52 | 1 MS.Trt_vs_MS.NoTrt_B |
| PIAS3    | 0.29429 | 0.29687 | 0.111 | 0.14 | 1 MS.Trt_vs_MS.NoTrt_B |
| NEK7     | 0.29503 | 0.62233 | 0.087 | 0.11 | 1 MS.Trt_vs_MS.NoTrt_B |
| RUNDC1   | 0.29506 | 0.38903 | 0.625 | 0.69 | 1 MS.Trt_vs_MS.NoTrt_B |
| LSM1     | 0.29538 | 0.27319 | 0.092 | 0.12 | 1 MS.Trt_vs_MS.NoTrt_B |
| PER2     | 0.29552 | 0.62231 | 0.401 | 0.47 | 1 MS.Trt_vs_MS.NoTrt_B |
| ADAMTSL3 | 0.29574 | 0.29543 | 0.863 | 0.98 | 1 MS.Trt_vs_MS.NoTrt_B |
| PSD      | 0.29605 | 0.32846 | 0.078 | 0.11 | 1 MS.Trt_vs_MS.NoTrt_B |
| KCTD9    | 0.29615 | -0.4792 | 0.146 | 0.18 | 1 MS.Trt_vs_MS.NoTrt_B |
| TSPYL1   | 0.29623 | 0.64028 | 0.471 | 0.56 | 1 MS.Trt_vs_MS.NoTrt_B |
| FAM107B  | 0.29773 | 0.57986 | 0.272 | 0.32 | 1 MS.Trt_vs_MS.NoTrt_B |

|            |         |         |       |      |   |                      |
|------------|---------|---------|-------|------|---|----------------------|
| VAMP4      | 0.29795 | 0.93474 | 0.139 | 0.17 | 1 | MS.Trt_vs_MS.NoTrt_B |
| HIST2H4B   | 0.29969 | 0.7075  | 0.118 | 0.15 | 1 | MS.Trt_vs_MS.NoTrt_B |
| TFEB       | 0.29998 | -0.7781 | 0.388 | 0.43 | 1 | MS.Trt_vs_MS.NoTrt_B |
| GPX2       | 0.3018  | -0.6988 | 0.168 | 0.2  | 1 | MS.Trt_vs_MS.NoTrt_B |
| CAAP1      | 0.3035  | 0.93013 | 0.081 | 0.11 | 1 | MS.Trt_vs_MS.NoTrt_B |
| RP11-500M8 | 0.30416 | 1.11045 | 0.102 | 0.14 | 1 | MS.Trt_vs_MS.NoTrt_B |
| COX15      | 0.30506 | 0.30254 | 0.464 | 0.51 | 1 | MS.Trt_vs_MS.NoTrt_B |
| MYH7B      | 0.30591 | -0.3385 | 0.678 | 0.78 | 1 | MS.Trt_vs_MS.NoTrt_B |
| FUT3       | 0.3072  | 0.28679 | 0.174 | 0.22 | 1 | MS.Trt_vs_MS.NoTrt_B |
| POP5       | 0.3075  | 0.5361  | 0.551 | 0.62 | 1 | MS.Trt_vs_MS.NoTrt_B |
| CTCF       | 0.30763 | 0.29619 | 0.098 | 0.12 | 1 | MS.Trt_vs_MS.NoTrt_B |
| ITPRIPL2   | 0.30891 | 0.29058 | 0.492 | 0.55 | 1 | MS.Trt_vs_MS.NoTrt_B |
| NCOR2      | 0.30908 | 0.33323 | 0.264 | 0.31 | 1 | MS.Trt_vs_MS.NoTrt_B |
| BUB1B      | 0.31018 | -0.3473 | 0.298 | 0.34 | 1 | MS.Trt_vs_MS.NoTrt_B |
| TMEM229B   | 0.31032 | 0.91285 | 0.155 | 0.19 | 1 | MS.Trt_vs_MS.NoTrt_B |
| CYP17A1    | 0.3105  | 0.35141 | 0.207 | 0.18 | 1 | MS.Trt_vs_MS.NoTrt_B |
| INSIG2     | 0.31083 | 0.27888 | 0.078 | 0.1  | 1 | MS.Trt_vs_MS.NoTrt_B |
| ZNF718     | 0.31215 | 0.37649 | 0.198 | 0.24 | 1 | MS.Trt_vs_MS.NoTrt_B |
| ARFIP2     | 0.31307 | -0.5896 | 0.373 | 0.42 | 1 | MS.Trt_vs_MS.NoTrt_B |
| PAXBP1     | 0.31395 | 0.81603 | 0.137 | 0.17 | 1 | MS.Trt_vs_MS.NoTrt_B |
| ANKRD36B   | 0.31405 | 0.44194 | 0.577 | 0.64 | 1 | MS.Trt_vs_MS.NoTrt_B |
| SNX3       | 0.31467 | 0.9487  | 0.109 | 0.14 | 1 | MS.Trt_vs_MS.NoTrt_B |
| PRIM1      | 0.31508 | 0.28496 | 0.12  | 0.15 | 1 | MS.Trt_vs_MS.NoTrt_B |
| PKN2       | 0.31518 | 0.42774 | 0.275 | 0.32 | 1 | MS.Trt_vs_MS.NoTrt_B |
| ZNF726     | 0.31584 | 0.56754 | 0.739 | 0.84 | 1 | MS.Trt_vs_MS.NoTrt_B |
| NIPSNAP1   | 0.31617 | -0.2845 | 0.316 | 0.35 | 1 | MS.Trt_vs_MS.NoTrt_B |
| SPP2       | 0.31678 | 0.31446 | 0.569 | 0.68 | 1 | MS.Trt_vs_MS.NoTrt_B |
| THEM4      | 0.31693 | 0.43641 | 0.717 | 0.81 | 1 | MS.Trt_vs_MS.NoTrt_B |
| RPP21      | 0.31731 | 0.50993 | 0.124 | 0.16 | 1 | MS.Trt_vs_MS.NoTrt_B |
| NCOA7      | 0.31754 | 0.32455 | 0.636 | 0.74 | 1 | MS.Trt_vs_MS.NoTrt_B |
| PRMT8      | 0.31785 | 0.81354 | 0.17  | 0.21 | 1 | MS.Trt_vs_MS.NoTrt_B |
| CXCR4      | 0.31789 | 0.83418 | 0.142 | 0.11 | 1 | MS.Trt_vs_MS.NoTrt_B |
| ATP7A      | 0.31838 | 0.76443 | 0.314 | 0.28 | 1 | MS.Trt_vs_MS.NoTrt_B |
| NUDT14     | 0.32024 | 0.76988 | 0.379 | 0.48 | 1 | MS.Trt_vs_MS.NoTrt_B |
| PKD1       | 0.32025 | 1.45174 | 0.333 | 0.38 | 1 | MS.Trt_vs_MS.NoTrt_B |
| FN1        | 0.32121 | 0.89676 | 0.309 | 0.36 | 1 | MS.Trt_vs_MS.NoTrt_B |
| ZNF385D    | 0.32134 | 0.26646 | 0.242 | 0.29 | 1 | MS.Trt_vs_MS.NoTrt_B |
| MSL2       | 0.3222  | 0.51934 | 0.109 | 0.14 | 1 | MS.Trt_vs_MS.NoTrt_B |
| SGPP2      | 0.32277 | 0.67585 | 0.253 | 0.28 | 1 | MS.Trt_vs_MS.NoTrt_B |
| DOCK6      | 0.32356 | 0.37642 | 0.451 | 0.55 | 1 | MS.Trt_vs_MS.NoTrt_B |

|           |         |         |       |      |                        |
|-----------|---------|---------|-------|------|------------------------|
| COQ10A    | 0.32361 | 0.87358 | 0.401 | 0.47 | 1 MS.Trt_vs_MS.NoTrt_B |
| TLE3      | 0.32391 | 0.88676 | 0.153 | 0.19 | 1 MS.Trt_vs_MS.NoTrt_B |
| CCDC93    | 0.32472 | -0.5883 | 0.1   | 0.12 | 1 MS.Trt_vs_MS.NoTrt_B |
| ZNF439    | 0.32542 | 0.69996 | 0.549 | 0.58 | 1 MS.Trt_vs_MS.NoTrt_B |
| NPIPB6    | 0.32543 | -0.3166 | 0.166 | 0.2  | 1 MS.Trt_vs_MS.NoTrt_B |
| MLF1      | 0.32712 | 0.82396 | 0.253 | 0.29 | 1 MS.Trt_vs_MS.NoTrt_B |
| ZNF780B   | 0.32811 | 0.65351 | 0.532 | 0.6  | 1 MS.Trt_vs_MS.NoTrt_B |
| STK25     | 0.32838 | 0.40658 | 0.601 | 0.71 | 1 MS.Trt_vs_MS.NoTrt_B |
| STAU1     | 0.32971 | 0.36595 | 0.325 | 0.36 | 1 MS.Trt_vs_MS.NoTrt_B |
| ESF1      | 0.32972 | 0.49206 | 0.094 | 0.12 | 1 MS.Trt_vs_MS.NoTrt_B |
| SLC39A9   | 0.33043 | -0.2883 | 0.124 | 0.15 | 1 MS.Trt_vs_MS.NoTrt_B |
| CADM1     | 0.33057 | 1.29772 | 0.2   | 0.17 | 1 MS.Trt_vs_MS.NoTrt_B |
| ATP5L2    | 0.33183 | 0.32185 | 0.255 | 0.23 | 1 MS.Trt_vs_MS.NoTrt_B |
| DICER1    | 0.33193 | 1.29329 | 0.131 | 0.16 | 1 MS.Trt_vs_MS.NoTrt_B |
| SPATA31A7 | 0.33353 | 0.28241 | 0.425 | 0.45 | 1 MS.Trt_vs_MS.NoTrt_B |
| PHPT1     | 0.33427 | 0.41165 | 0.109 | 0.14 | 1 MS.Trt_vs_MS.NoTrt_B |
| ITPR3     | 0.33459 | 0.55938 | 0.118 | 0.15 | 1 MS.Trt_vs_MS.NoTrt_B |
| TOP2B     | 0.33483 | 0.38616 | 0.198 | 0.23 | 1 MS.Trt_vs_MS.NoTrt_B |
| TONSL     | 0.33624 | 0.45531 | 0.54  | 0.62 | 1 MS.Trt_vs_MS.NoTrt_B |
| SMUG1     | 0.33624 | 0.65606 | 0.582 | 0.7  | 1 MS.Trt_vs_MS.NoTrt_B |
| SF3A2     | 0.33625 | 0.59421 | 0.296 | 0.34 | 1 MS.Trt_vs_MS.NoTrt_B |
| MIER1     | 0.3364  | 1.03841 | 0.597 | 0.75 | 1 MS.Trt_vs_MS.NoTrt_B |
| FRK       | 0.33663 | 0.29573 | 0.946 | 1    | 1 MS.Trt_vs_MS.NoTrt_B |
| TM9SF3    | 0.33796 | 0.9687  | 0.107 | 0.14 | 1 MS.Trt_vs_MS.NoTrt_B |
| TOR1B     | 0.33835 | 1.23549 | 0.144 | 0.11 | 1 MS.Trt_vs_MS.NoTrt_B |
| NOTCH2NL  | 0.33861 | 0.65237 | 0.146 | 0.18 | 1 MS.Trt_vs_MS.NoTrt_B |
| HSPE1     | 0.33929 | 0.96845 | 0.242 | 0.29 | 1 MS.Trt_vs_MS.NoTrt_B |
| ZNF688    | 0.33957 | 0.93685 | 0.479 | 0.42 | 1 MS.Trt_vs_MS.NoTrt_B |
| NBPF10    | 0.33971 | 0.95003 | 0.2   | 0.17 | 1 MS.Trt_vs_MS.NoTrt_B |
| ALDH1B1   | 0.34039 | 0.77745 | 0.495 | 0.59 | 1 MS.Trt_vs_MS.NoTrt_B |
| COMMD8    | 0.34059 | 0.54068 | 0.083 | 0.11 | 1 MS.Trt_vs_MS.NoTrt_B |
| DCAF1     | 0.34061 | 0.46319 | 0.17  | 0.21 | 1 MS.Trt_vs_MS.NoTrt_B |
| AKR1B1    | 0.34062 | 0.38085 | 0.669 | 0.75 | 1 MS.Trt_vs_MS.NoTrt_B |
| GTF2H2    | 0.34124 | -0.2621 | 0.817 | 0.89 | 1 MS.Trt_vs_MS.NoTrt_B |
| OSGEPL1   | 0.34131 | 0.67227 | 0.257 | 0.31 | 1 MS.Trt_vs_MS.NoTrt_B |
| TTC38     | 0.34169 | -1.2052 | 0.359 | 0.42 | 1 MS.Trt_vs_MS.NoTrt_B |
| FAM21C    | 0.34182 | 0.51184 | 0.183 | 0.22 | 1 MS.Trt_vs_MS.NoTrt_B |
| TMPRSS3   | 0.34194 | 0.83798 | 0.292 | 0.33 | 1 MS.Trt_vs_MS.NoTrt_B |
| SCYL3     | 0.34196 | 0.57276 | 0.575 | 0.64 | 1 MS.Trt_vs_MS.NoTrt_B |
| KIAA1683  | 0.34227 | 0.33743 | 0.497 | 0.61 | 1 MS.Trt_vs_MS.NoTrt_B |

|          |         |         |       |      |                        |
|----------|---------|---------|-------|------|------------------------|
| SLFN11   | 0.34341 | -0.4405 | 0.207 | 0.24 | 1 MS.Trt_vs_MS.NoTrt_B |
| KPTN     | 0.34444 | -0.3823 | 0.174 | 0.22 | 1 MS.Trt_vs_MS.NoTrt_B |
| CCNG2    | 0.34517 | 0.77685 | 0.246 | 0.29 | 1 MS.Trt_vs_MS.NoTrt_B |
| ELP4     | 0.34541 | 0.58761 | 0.438 | 0.5  | 1 MS.Trt_vs_MS.NoTrt_B |
| NUP35    | 0.34569 | -0.3641 | 0.427 | 0.5  | 1 MS.Trt_vs_MS.NoTrt_B |
| NDUFV3   | 0.34656 | 0.42908 | 0.904 | 0.97 | 1 MS.Trt_vs_MS.NoTrt_B |
| CCT5     | 0.34694 | 0.3681  | 0.155 | 0.19 | 1 MS.Trt_vs_MS.NoTrt_B |
| ZC3H10   | 0.34697 | 0.35425 | 0.416 | 0.48 | 1 MS.Trt_vs_MS.NoTrt_B |
| PDPN     | 0.34725 | 0.28879 | 0.436 | 0.42 | 1 MS.Trt_vs_MS.NoTrt_B |
| TBCD     | 0.34769 | 0.32565 | 0.159 | 0.19 | 1 MS.Trt_vs_MS.NoTrt_B |
| MAGEH1   | 0.3478  | 0.29385 | 0.089 | 0.11 | 1 MS.Trt_vs_MS.NoTrt_B |
| ARMC6    | 0.34808 | 0.31231 | 0.24  | 0.28 | 1 MS.Trt_vs_MS.NoTrt_B |
| SBNO1    | 0.3484  | 0.3208  | 0.558 | 0.6  | 1 MS.Trt_vs_MS.NoTrt_B |
| TBP      | 0.34938 | 0.43366 | 0.312 | 0.35 | 1 MS.Trt_vs_MS.NoTrt_B |
| ACP1     | 0.34967 | 0.70596 | 0.285 | 0.35 | 1 MS.Trt_vs_MS.NoTrt_B |
| MBD6     | 0.35042 | 0.33825 | 0.153 | 0.18 | 1 MS.Trt_vs_MS.NoTrt_B |
| QTRT2    | 0.35105 | -0.4091 | 0.658 | 0.79 | 1 MS.Trt_vs_MS.NoTrt_B |
| RDH11    | 0.35108 | 0.34518 | 0.442 | 0.48 | 1 MS.Trt_vs_MS.NoTrt_B |
| KMT2D    | 0.35145 | 0.41732 | 0.741 | 0.83 | 1 MS.Trt_vs_MS.NoTrt_B |
| NR3C1    | 0.35211 | 0.25893 | 0.168 | 0.2  | 1 MS.Trt_vs_MS.NoTrt_B |
| COX10    | 0.35265 | 0.72428 | 0.094 | 0.12 | 1 MS.Trt_vs_MS.NoTrt_B |
| GTF2E1   | 0.35288 | 0.35835 | 0.192 | 0.22 | 1 MS.Trt_vs_MS.NoTrt_B |
| PEX7     | 0.35339 | -0.7819 | 0.12  | 0.15 | 1 MS.Trt_vs_MS.NoTrt_B |
| DNAH17   | 0.35367 | 0.28756 | 0.246 | 0.28 | 1 MS.Trt_vs_MS.NoTrt_B |
| KCNE4    | 0.3546  | 0.33756 | 0.734 | 0.87 | 1 MS.Trt_vs_MS.NoTrt_B |
| TRIM46   | 0.35463 | -0.3652 | 0.375 | 0.44 | 1 MS.Trt_vs_MS.NoTrt_B |
| CREM     | 0.3562  | 0.86119 | 0.157 | 0.13 | 1 MS.Trt_vs_MS.NoTrt_B |
| C19orf54 | 0.3563  | 0.34953 | 0.394 | 0.46 | 1 MS.Trt_vs_MS.NoTrt_B |
| PTPN23   | 0.35631 | 1.10486 | 0.102 | 0.08 | 1 MS.Trt_vs_MS.NoTrt_B |
| INF2     | 0.35672 | 0.77289 | 0.179 | 0.22 | 1 MS.Trt_vs_MS.NoTrt_B |
| ITSN1    | 0.35762 | 0.73627 | 0.767 | 0.85 | 1 MS.Trt_vs_MS.NoTrt_B |
| SLC4A7   | 0.35829 | 0.38545 | 0.264 | 0.3  | 1 MS.Trt_vs_MS.NoTrt_B |
| C3orf49  | 0.35889 | 0.69849 | 0.259 | 0.3  | 1 MS.Trt_vs_MS.NoTrt_B |
| SNAPC3   | 0.35897 | 0.4648  | 0.495 | 0.55 | 1 MS.Trt_vs_MS.NoTrt_B |
| CCDC144A | 0.35944 | 0.86804 | 0.749 | 0.84 | 1 MS.Trt_vs_MS.NoTrt_B |
| GARNL3   | 0.35952 | 0.75174 | 0.131 | 0.16 | 1 MS.Trt_vs_MS.NoTrt_B |
| FANCA    | 0.35974 | -0.327  | 0.253 | 0.28 | 1 MS.Trt_vs_MS.NoTrt_B |
| MYL6B    | 0.35981 | 0.62817 | 0.458 | 0.51 | 1 MS.Trt_vs_MS.NoTrt_B |
| GAPVD1   | 0.36032 | 0.45028 | 0.73  | 0.88 | 1 MS.Trt_vs_MS.NoTrt_B |
| SGCB     | 0.36044 | 0.27599 | 0.216 | 0.24 | 1 MS.Trt_vs_MS.NoTrt_B |

|           |         |         |       |      |   |                      |
|-----------|---------|---------|-------|------|---|----------------------|
| TNK2      | 0.3608  | 0.58563 | 0.085 | 0.11 | 1 | MS.Trt_vs_MS.NoTrt_B |
| DENND5A   | 0.36109 | 1.8391  | 0.203 | 0.17 | 1 | MS.Trt_vs_MS.NoTrt_B |
| OR7A5     | 0.3621  | 0.2981  | 0.359 | 0.42 | 1 | MS.Trt_vs_MS.NoTrt_B |
| FAM117B   | 0.36252 | 0.76217 | 0.331 | 0.37 | 1 | MS.Trt_vs_MS.NoTrt_B |
| XRCC3     | 0.36329 | 0.86494 | 0.342 | 0.38 | 1 | MS.Trt_vs_MS.NoTrt_B |
| MANBA     | 0.36344 | 0.31326 | 0.124 | 0.15 | 1 | MS.Trt_vs_MS.NoTrt_B |
| APPL1     | 0.36363 | 1.18085 | 0.355 | 0.41 | 1 | MS.Trt_vs_MS.NoTrt_B |
| ZNF124    | 0.36577 | 0.76756 | 0.51  | 0.63 | 1 | MS.Trt_vs_MS.NoTrt_B |
| FMO3      | 0.36591 | 0.43882 | 0.505 | 0.51 | 1 | MS.Trt_vs_MS.NoTrt_B |
| ABCA8     | 0.36624 | 0.29625 | 0.353 | 0.32 | 1 | MS.Trt_vs_MS.NoTrt_B |
| CYP7B1    | 0.36657 | 0.33107 | 0.359 | 0.42 | 1 | MS.Trt_vs_MS.NoTrt_B |
| CAT       | 0.367   | 0.27974 | 0.109 | 0.14 | 1 | MS.Trt_vs_MS.NoTrt_B |
| FAM19A2   | 0.36754 | 0.80554 | 0.185 | 0.22 | 1 | MS.Trt_vs_MS.NoTrt_B |
| DNAH7     | 0.36803 | 0.31086 | 0.558 | 0.61 | 1 | MS.Trt_vs_MS.NoTrt_B |
| HLA-DRB3  | 0.36832 | 0.92003 | 0.109 | 0.14 | 1 | MS.Trt_vs_MS.NoTrt_B |
| MBD1      | 0.36866 | 0.71776 | 0.168 | 0.14 | 1 | MS.Trt_vs_MS.NoTrt_B |
| SNCAIP    | 0.36869 | 0.25778 | 0.331 | 0.4  | 1 | MS.Trt_vs_MS.NoTrt_B |
| KIAA0825  | 0.3687  | 0.29079 | 0.222 | 0.27 | 1 | MS.Trt_vs_MS.NoTrt_B |
| MRPL14    | 0.36922 | 0.55672 | 0.085 | 0.11 | 1 | MS.Trt_vs_MS.NoTrt_B |
| COG6      | 0.36929 | 0.42954 | 0.096 | 0.12 | 1 | MS.Trt_vs_MS.NoTrt_B |
| PFKFB2    | 0.36938 | 0.52501 | 0.157 | 0.2  | 1 | MS.Trt_vs_MS.NoTrt_B |
| TMEM256-P | 0.36942 | 0.46867 | 0.481 | 0.62 | 1 | MS.Trt_vs_MS.NoTrt_B |
| TRADD     | 0.37174 | 0.25695 | 0.168 | 0.2  | 1 | MS.Trt_vs_MS.NoTrt_B |
| ZNF138    | 0.37177 | 1.27876 | 0.081 | 0.1  | 1 | MS.Trt_vs_MS.NoTrt_B |
| FSIP2     | 0.3731  | 0.32092 | 0.645 | 0.76 | 1 | MS.Trt_vs_MS.NoTrt_B |
| UBE2A     | 0.37401 | 0.636   | 0.288 | 0.32 | 1 | MS.Trt_vs_MS.NoTrt_B |
| RBM45     | 0.37436 | 0.80521 | 0.081 | 0.1  | 1 | MS.Trt_vs_MS.NoTrt_B |
| ZRSR2     | 0.37453 | 0.46978 | 0.63  | 0.76 | 1 | MS.Trt_vs_MS.NoTrt_B |
| CYB561D1  | 0.37495 | -0.2594 | 0.325 | 0.37 | 1 | MS.Trt_vs_MS.NoTrt_B |
| PTAFR     | 0.37564 | 0.26566 | 0.523 | 0.61 | 1 | MS.Trt_vs_MS.NoTrt_B |
| TIMM8B    | 0.37571 | 0.52452 | 0.089 | 0.11 | 1 | MS.Trt_vs_MS.NoTrt_B |
| ECI2      | 0.37608 | 0.2696  | 0.519 | 0.58 | 1 | MS.Trt_vs_MS.NoTrt_B |
| ZMAT3     | 0.37614 | 0.76589 | 0.499 | 0.6  | 1 | MS.Trt_vs_MS.NoTrt_B |
| GPR161    | 0.37714 | -0.2936 | 0.368 | 0.42 | 1 | MS.Trt_vs_MS.NoTrt_B |
| TBC1D24   | 0.37838 | 0.96245 | 0.599 | 0.68 | 1 | MS.Trt_vs_MS.NoTrt_B |
| SLC1A4    | 0.37847 | 0.49539 | 0.495 | 0.61 | 1 | MS.Trt_vs_MS.NoTrt_B |
| MFSD11    | 0.3795  | -0.316  | 0.377 | 0.42 | 1 | MS.Trt_vs_MS.NoTrt_B |
| EXT2      | 0.3799  | -0.2945 | 0.111 | 0.14 | 1 | MS.Trt_vs_MS.NoTrt_B |
| TBL3      | 0.37999 | 0.32593 | 0.233 | 0.27 | 1 | MS.Trt_vs_MS.NoTrt_B |
| ITGB8     | 0.38012 | 0.69905 | 0.636 | 0.71 | 1 | MS.Trt_vs_MS.NoTrt_B |

|           |         |         |       |      |                        |
|-----------|---------|---------|-------|------|------------------------|
| DBNDD1    | 0.38019 | -0.5857 | 0.122 | 0.15 | 1 MS.Trt_vs_MS.NoTrt_B |
| PRKD3     | 0.38051 | 0.60996 | 0.294 | 0.32 | 1 MS.Trt_vs_MS.NoTrt_B |
| PPIL4     | 0.38123 | 0.95487 | 0.185 | 0.22 | 1 MS.Trt_vs_MS.NoTrt_B |
| SGF29     | 0.38129 | 0.34789 | 0.224 | 0.26 | 1 MS.Trt_vs_MS.NoTrt_B |
| BAIAP2L1  | 0.38162 | 0.54066 | 0.405 | 0.46 | 1 MS.Trt_vs_MS.NoTrt_B |
| ZMYM5     | 0.38171 | 0.3401  | 0.179 | 0.21 | 1 MS.Trt_vs_MS.NoTrt_B |
| DHRS7B    | 0.38206 | 0.43393 | 0.416 | 0.47 | 1 MS.Trt_vs_MS.NoTrt_B |
| SYNC      | 0.38228 | 0.85986 | 0.12  | 0.15 | 1 MS.Trt_vs_MS.NoTrt_B |
| BRAF      | 0.38254 | 0.79457 | 0.107 | 0.14 | 1 MS.Trt_vs_MS.NoTrt_B |
| LINC00094 | 0.38373 | 1.15596 | 0.399 | 0.46 | 1 MS.Trt_vs_MS.NoTrt_B |
| FAIM      | 0.38424 | 1.06078 | 0.32  | 0.37 | 1 MS.Trt_vs_MS.NoTrt_B |
| MRPS10    | 0.38488 | 0.28349 | 0.407 | 0.43 | 1 MS.Trt_vs_MS.NoTrt_B |
| CAGE1     | 0.38521 | 0.47411 | 0.253 | 0.3  | 1 MS.Trt_vs_MS.NoTrt_B |
| TCF20     | 0.38674 | 0.32057 | 0.109 | 0.14 | 1 MS.Trt_vs_MS.NoTrt_B |
| ZNF347    | 0.38737 | -0.3312 | 0.817 | 0.9  | 1 MS.Trt_vs_MS.NoTrt_B |
| KIAA0513  | 0.3877  | -1.0127 | 0.521 | 0.56 | 1 MS.Trt_vs_MS.NoTrt_B |
| ZFHX3     | 0.38881 | 0.26597 | 0.1   | 0.12 | 1 MS.Trt_vs_MS.NoTrt_B |
| ASPSCR1   | 0.38888 | -0.6892 | 0.558 | 0.61 | 1 MS.Trt_vs_MS.NoTrt_B |
| USP9Y     | 0.38945 | -0.6349 | 0.222 | 0.25 | 1 MS.Trt_vs_MS.NoTrt_B |
| JUN       | 0.39026 | 0.82168 | 0.142 | 0.12 | 1 MS.Trt_vs_MS.NoTrt_B |
| DYRK1A    | 0.39032 | 0.36355 | 0.601 | 0.68 | 1 MS.Trt_vs_MS.NoTrt_B |
| PITPNC1   | 0.39099 | 0.49146 | 0.17  | 0.2  | 1 MS.Trt_vs_MS.NoTrt_B |
| PAEP      | 0.39121 | 1.10711 | 0.349 | 0.34 | 1 MS.Trt_vs_MS.NoTrt_B |
| SULT1B1   | 0.39134 | 0.3002  | 0.852 | 0.96 | 1 MS.Trt_vs_MS.NoTrt_B |
| PDCL3     | 0.39257 | 0.33222 | 0.092 | 0.11 | 1 MS.Trt_vs_MS.NoTrt_B |
| PRKCE     | 0.39259 | 0.40296 | 0.094 | 0.12 | 1 MS.Trt_vs_MS.NoTrt_B |
| NR4A2     | 0.39315 | 1.38497 | 0.089 | 0.11 | 1 MS.Trt_vs_MS.NoTrt_B |
| ZNF559    | 0.39346 | 0.43711 | 0.584 | 0.69 | 1 MS.Trt_vs_MS.NoTrt_B |
| PPP1R15B  | 0.39512 | -0.6616 | 0.261 | 0.28 | 1 MS.Trt_vs_MS.NoTrt_B |
| ZNF451    | 0.39592 | 0.39611 | 0.673 | 0.71 | 1 MS.Trt_vs_MS.NoTrt_B |
| SESN1     | 0.39718 | 0.33102 | 0.15  | 0.18 | 1 MS.Trt_vs_MS.NoTrt_B |
| ZNF574    | 0.39776 | 0.66629 | 0.292 | 0.27 | 1 MS.Trt_vs_MS.NoTrt_B |
| PNPLA1    | 0.39838 | 0.25184 | 0.248 | 0.23 | 1 MS.Trt_vs_MS.NoTrt_B |
| MTMR4     | 0.39899 | 0.48561 | 0.196 | 0.23 | 1 MS.Trt_vs_MS.NoTrt_B |
| FAM217B   | 0.39928 | 0.5932  | 0.288 | 0.35 | 1 MS.Trt_vs_MS.NoTrt_B |
| CTNND1    | 0.39992 | 0.47135 | 0.246 | 0.3  | 1 MS.Trt_vs_MS.NoTrt_B |
| STIL      | 0.40073 | 1.10427 | 0.503 | 0.55 | 1 MS.Trt_vs_MS.NoTrt_B |
| ABCD3     | 0.40116 | -0.4278 | 0.102 | 0.12 | 1 MS.Trt_vs_MS.NoTrt_B |
| THEMIS    | 0.40123 | 0.63694 | 0.183 | 0.16 | 1 MS.Trt_vs_MS.NoTrt_B |
| CAPZA1    | 0.40401 | 0.81123 | 0.813 | 0.9  | 1 MS.Trt_vs_MS.NoTrt_B |



|            |         |         |       |      |                        |
|------------|---------|---------|-------|------|------------------------|
| ITGA4      | 0.40454 | 0.97094 | 0.192 | 0.17 | 1 MS.Trt_vs_MS.NoTrt_B |
| SERINC5    | 0.40465 | 0.50888 | 0.852 | 0.89 | 1 MS.Trt_vs_MS.NoTrt_B |
| ASTN2      | 0.40507 | 0.39442 | 0.834 | 0.95 | 1 MS.Trt_vs_MS.NoTrt_B |
| PTGES3L    | 0.40525 | 0.32169 | 0.743 | 0.82 | 1 MS.Trt_vs_MS.NoTrt_B |
| EHBP1      | 0.4054  | 1.13273 | 0.34  | 0.38 | 1 MS.Trt_vs_MS.NoTrt_B |
| PLEKHG5    | 0.40771 | 0.76021 | 0.115 | 0.14 | 1 MS.Trt_vs_MS.NoTrt_B |
| RNF157     | 0.40778 | 0.93811 | 0.501 | 0.56 | 1 MS.Trt_vs_MS.NoTrt_B |
| WDR31      | 0.40802 | 0.34123 | 0.717 | 0.81 | 1 MS.Trt_vs_MS.NoTrt_B |
| PCYT1A     | 0.40812 | -0.256  | 0.438 | 0.5  | 1 MS.Trt_vs_MS.NoTrt_B |
| GNLY       | 0.40833 | 0.53801 | 0.166 | 0.2  | 1 MS.Trt_vs_MS.NoTrt_B |
| FCGR2A     | 0.40864 | 0.70155 | 0.137 | 0.16 | 1 MS.Trt_vs_MS.NoTrt_B |
| CDNF       | 0.40923 | 1.51182 | 0.118 | 0.14 | 1 MS.Trt_vs_MS.NoTrt_B |
| FKTN       | 0.4096  | 0.80533 | 0.118 | 0.14 | 1 MS.Trt_vs_MS.NoTrt_B |
| ZIK1       | 0.40961 | -0.6287 | 0.253 | 0.28 | 1 MS.Trt_vs_MS.NoTrt_B |
| LECT2      | 0.41    | 0.30143 | 0.094 | 0.12 | 1 MS.Trt_vs_MS.NoTrt_B |
| GCNT2      | 0.41176 | 0.31899 | 0.575 | 0.67 | 1 MS.Trt_vs_MS.NoTrt_B |
| LRRC8D     | 0.41227 | 0.75915 | 0.113 | 0.14 | 1 MS.Trt_vs_MS.NoTrt_B |
| RP11-849H4 | 0.41296 | 0.48146 | 0.479 | 0.51 | 1 MS.Trt_vs_MS.NoTrt_B |
| TMEM64     | 0.41309 | 0.33961 | 0.281 | 0.32 | 1 MS.Trt_vs_MS.NoTrt_B |
| ACRC       | 0.41323 | -0.7665 | 0.336 | 0.37 | 1 MS.Trt_vs_MS.NoTrt_B |
| HOMER3     | 0.4134  | -0.4    | 0.237 | 0.28 | 1 MS.Trt_vs_MS.NoTrt_B |
| PRDM5      | 0.41361 | 0.33229 | 0.556 | 0.67 | 1 MS.Trt_vs_MS.NoTrt_B |
| CARS2      | 0.41369 | 0.3315  | 0.647 | 0.77 | 1 MS.Trt_vs_MS.NoTrt_B |
| AP1G2      | 0.41391 | 0.49929 | 0.612 | 0.72 | 1 MS.Trt_vs_MS.NoTrt_B |
| RIC8B      | 0.41429 | 0.79088 | 0.111 | 0.09 | 1 MS.Trt_vs_MS.NoTrt_B |
| COLGALT1   | 0.41485 | 0.45276 | 0.403 | 0.47 | 1 MS.Trt_vs_MS.NoTrt_B |
| PTOV1      | 0.41579 | 0.42344 | 0.096 | 0.12 | 1 MS.Trt_vs_MS.NoTrt_B |
| FNTB       | 0.41583 | -0.5435 | 0.118 | 0.14 | 1 MS.Trt_vs_MS.NoTrt_B |
| SLC2A13    | 0.41743 | 0.43689 | 0.27  | 0.31 | 1 MS.Trt_vs_MS.NoTrt_B |
| ZBTB20     | 0.41754 | 0.62786 | 0.678 | 0.74 | 1 MS.Trt_vs_MS.NoTrt_B |
| MRPL44     | 0.41824 | -0.396  | 0.46  | 0.49 | 1 MS.Trt_vs_MS.NoTrt_B |
| IMP4       | 0.41829 | 0.3862  | 0.172 | 0.2  | 1 MS.Trt_vs_MS.NoTrt_B |
| GTF2H2C    | 0.41866 | -0.2791 | 0.351 | 0.38 | 1 MS.Trt_vs_MS.NoTrt_B |
| ZMAT2      | 0.41933 | 0.27722 | 0.087 | 0.11 | 1 MS.Trt_vs_MS.NoTrt_B |
| SLC2A6     | 0.41939 | -0.6663 | 0.19  | 0.22 | 1 MS.Trt_vs_MS.NoTrt_B |
| ZNF157     | 0.41959 | 0.28906 | 0.686 | 0.72 | 1 MS.Trt_vs_MS.NoTrt_B |
| MARK2      | 0.4196  | 0.30423 | 0.083 | 0.1  | 1 MS.Trt_vs_MS.NoTrt_B |
| MTF1       | 0.42011 | 0.84319 | 0.198 | 0.23 | 1 MS.Trt_vs_MS.NoTrt_B |
| ZFP30      | 0.42064 | 0.38855 | 0.771 | 0.81 | 1 MS.Trt_vs_MS.NoTrt_B |
| TMEM44     | 0.4214  | -0.3318 | 0.447 | 0.49 | 1 MS.Trt_vs_MS.NoTrt_B |

|          |         |         |       |      |   |                      |
|----------|---------|---------|-------|------|---|----------------------|
| ERCC6L2  | 0.42145 | 0.26967 | 0.157 | 0.18 | 1 | MS.Trt_vs_MS.NoTrt_B |
| ARL8B    | 0.42234 | 0.45542 | 0.318 | 0.35 | 1 | MS.Trt_vs_MS.NoTrt_B |
| ZNF836   | 0.4235  | 1.24487 | 0.155 | 0.18 | 1 | MS.Trt_vs_MS.NoTrt_B |
| PARK2    | 0.42376 | 0.26251 | 0.527 | 0.57 | 1 | MS.Trt_vs_MS.NoTrt_B |
| FBLN5    | 0.42624 | 0.37663 | 0.133 | 0.16 | 1 | MS.Trt_vs_MS.NoTrt_B |
| CAMTA2   | 0.42714 | 0.46108 | 0.425 | 0.45 | 1 | MS.Trt_vs_MS.NoTrt_B |
| ADSS     | 0.42777 | 0.39831 | 0.139 | 0.17 | 1 | MS.Trt_vs_MS.NoTrt_B |
| BLOC1S6  | 0.42805 | 0.30495 | 0.928 | 1    | 1 | MS.Trt_vs_MS.NoTrt_B |
| PTDSS2   | 0.42815 | -0.3572 | 0.092 | 0.11 | 1 | MS.Trt_vs_MS.NoTrt_B |
| XYLT1    | 0.42835 | -0.2885 | 0.096 | 0.11 | 1 | MS.Trt_vs_MS.NoTrt_B |
| TMEM191C | 0.42842 | 0.32837 | 0.617 | 0.72 | 1 | MS.Trt_vs_MS.NoTrt_B |
| NPIPB15  | 0.42896 | 0.35303 | 0.214 | 0.24 | 1 | MS.Trt_vs_MS.NoTrt_B |
| TMEM5    | 0.42919 | 1.31936 | 0.386 | 0.45 | 1 | MS.Trt_vs_MS.NoTrt_B |
| NRP1     | 0.42976 | 0.28961 | 0.322 | 0.37 | 1 | MS.Trt_vs_MS.NoTrt_B |
| MT-ND6   | 0.43055 | 0.39976 | 0.68  | 0.76 | 1 | MS.Trt_vs_MS.NoTrt_B |
| ARHGEF10 | 0.43119 | 0.4023  | 0.643 | 0.58 | 1 | MS.Trt_vs_MS.NoTrt_B |
| CCSAP    | 0.43122 | 0.69833 | 0.098 | 0.12 | 1 | MS.Trt_vs_MS.NoTrt_B |
| TMEM39A  | 0.43145 | 0.90264 | 0.087 | 0.11 | 1 | MS.Trt_vs_MS.NoTrt_B |
| TFPI     | 0.43214 | 0.29355 | 0.843 | 0.98 | 1 | MS.Trt_vs_MS.NoTrt_B |
| BCDIN3D  | 0.43223 | -0.3543 | 0.275 | 0.24 | 1 | MS.Trt_vs_MS.NoTrt_B |
| SMAD1    | 0.43328 | 0.4776  | 0.285 | 0.27 | 1 | MS.Trt_vs_MS.NoTrt_B |
| ZNF100   | 0.43352 | 0.57638 | 0.745 | 0.82 | 1 | MS.Trt_vs_MS.NoTrt_B |
| CAMKK1   | 0.43401 | 0.91468 | 0.161 | 0.2  | 1 | MS.Trt_vs_MS.NoTrt_B |
| IPO7     | 0.43484 | 0.96905 | 0.318 | 0.36 | 1 | MS.Trt_vs_MS.NoTrt_B |
| DNAJC24  | 0.43579 | 0.30716 | 0.612 | 0.68 | 1 | MS.Trt_vs_MS.NoTrt_B |
| CCDC170  | 0.43758 | 0.53862 | 0.307 | 0.28 | 1 | MS.Trt_vs_MS.NoTrt_B |
| SPTLC2   | 0.43874 | -0.5927 | 0.586 | 0.6  | 1 | MS.Trt_vs_MS.NoTrt_B |
| AGXT     | 0.43935 | 0.3648  | 0.527 | 0.64 | 1 | MS.Trt_vs_MS.NoTrt_B |
| B3GAT2   | 0.43966 | 0.27385 | 0.15  | 0.12 | 1 | MS.Trt_vs_MS.NoTrt_B |
| TMEM45A  | 0.44073 | 0.26492 | 0.95  | 1    | 1 | MS.Trt_vs_MS.NoTrt_B |
| STXBP3   | 0.44106 | 0.31063 | 0.542 | 0.52 | 1 | MS.Trt_vs_MS.NoTrt_B |
| METTL16  | 0.44168 | 0.44189 | 0.662 | 0.69 | 1 | MS.Trt_vs_MS.NoTrt_B |
| STON1    | 0.44241 | 0.35632 | 0.277 | 0.31 | 1 | MS.Trt_vs_MS.NoTrt_B |
| CD300LG  | 0.44282 | 0.45439 | 0.359 | 0.36 | 1 | MS.Trt_vs_MS.NoTrt_B |
| CACNB3   | 0.44339 | 0.6979  | 0.458 | 0.56 | 1 | MS.Trt_vs_MS.NoTrt_B |
| TIMP2    | 0.44361 | 0.6663  | 0.131 | 0.16 | 1 | MS.Trt_vs_MS.NoTrt_B |
| GNG7     | 0.44392 | 0.41085 | 0.29  | 0.35 | 1 | MS.Trt_vs_MS.NoTrt_B |
| MED6     | 0.44434 | 0.36421 | 0.442 | 0.48 | 1 | MS.Trt_vs_MS.NoTrt_B |
| C6orf25  | 0.44449 | 0.25191 | 0.366 | 0.42 | 1 | MS.Trt_vs_MS.NoTrt_B |
| MRPL27   | 0.44536 | 0.62316 | 0.142 | 0.17 | 1 | MS.Trt_vs_MS.NoTrt_B |

|            |         |         |       |      |                        |
|------------|---------|---------|-------|------|------------------------|
| PLCL1      | 0.4454  | 0.47962 | 0.111 | 0.13 | 1 MS.Trt_vs_MS.NoTrt_B |
| MAN2A2     | 0.4462  | 0.70403 | 0.214 | 0.25 | 1 MS.Trt_vs_MS.NoTrt_B |
| FGFR1      | 0.44621 | 0.64047 | 0.71  | 0.78 | 1 MS.Trt_vs_MS.NoTrt_B |
| RAD52      | 0.44757 | 0.27029 | 0.244 | 0.27 | 1 MS.Trt_vs_MS.NoTrt_B |
| XKR8       | 0.44759 | -0.7553 | 0.122 | 0.14 | 1 MS.Trt_vs_MS.NoTrt_B |
| IFI27      | 0.44887 | 0.26685 | 0.292 | 0.34 | 1 MS.Trt_vs_MS.NoTrt_B |
| ZFAND6     | 0.44931 | 0.42402 | 0.155 | 0.18 | 1 MS.Trt_vs_MS.NoTrt_B |
| RHEB       | 0.45246 | 0.6169  | 0.122 | 0.15 | 1 MS.Trt_vs_MS.NoTrt_B |
| TERF2      | 0.45254 | 0.52529 | 0.782 | 0.84 | 1 MS.Trt_vs_MS.NoTrt_B |
| CREB3L4    | 0.45255 | 1.52125 | 0.331 | 0.4  | 1 MS.Trt_vs_MS.NoTrt_B |
| AP5S1      | 0.45259 | -0.6595 | 0.747 | 0.81 | 1 MS.Trt_vs_MS.NoTrt_B |
| RP11-437B1 | 0.45266 | 0.88779 | 0.438 | 0.5  | 1 MS.Trt_vs_MS.NoTrt_B |
| CCDC36     | 0.45357 | 0.96926 | 0.251 | 0.29 | 1 MS.Trt_vs_MS.NoTrt_B |
| PARG       | 0.45485 | -0.3801 | 0.107 | 0.12 | 1 MS.Trt_vs_MS.NoTrt_B |
| MON1B      | 0.455   | 0.31881 | 0.577 | 0.61 | 1 MS.Trt_vs_MS.NoTrt_B |
| TBCEL      | 0.45615 | 0.58104 | 0.092 | 0.11 | 1 MS.Trt_vs_MS.NoTrt_B |
| TNRC6B     | 0.45826 | 0.50588 | 0.891 | 1    | 1 MS.Trt_vs_MS.NoTrt_B |
| ZYG11B     | 0.4591  | -0.2986 | 0.608 | 0.62 | 1 MS.Trt_vs_MS.NoTrt_B |
| DTD1       | 0.45929 | 0.45963 | 0.253 | 0.28 | 1 MS.Trt_vs_MS.NoTrt_B |
| CDCP1      | 0.46019 | 0.50665 | 0.366 | 0.38 | 1 MS.Trt_vs_MS.NoTrt_B |
| ADAMTS1    | 0.46064 | 0.25726 | 0.401 | 0.45 | 1 MS.Trt_vs_MS.NoTrt_B |
| TMEM38A    | 0.4607  | 0.67306 | 0.455 | 0.45 | 1 MS.Trt_vs_MS.NoTrt_B |
| ST3GAL2    | 0.46253 | 0.44007 | 0.863 | 0.97 | 1 MS.Trt_vs_MS.NoTrt_B |
| CYP4V2     | 0.46285 | 0.78709 | 0.601 | 0.69 | 1 MS.Trt_vs_MS.NoTrt_B |
| ACSL1      | 0.46302 | 0.34804 | 0.185 | 0.21 | 1 MS.Trt_vs_MS.NoTrt_B |
| POLR3D     | 0.46315 | -0.4899 | 0.298 | 0.34 | 1 MS.Trt_vs_MS.NoTrt_B |
| MAP7D3     | 0.46393 | -0.4053 | 0.429 | 0.49 | 1 MS.Trt_vs_MS.NoTrt_B |
| SSBP2      | 0.46439 | 0.27932 | 0.773 | 0.92 | 1 MS.Trt_vs_MS.NoTrt_B |
| SYMPK      | 0.46526 | 0.35219 | 0.8   | 0.89 | 1 MS.Trt_vs_MS.NoTrt_B |
| LY75       | 0.46552 | -0.3258 | 0.477 | 0.47 | 1 MS.Trt_vs_MS.NoTrt_B |
| PNPLA2     | 0.46569 | 0.65137 | 0.133 | 0.16 | 1 MS.Trt_vs_MS.NoTrt_B |
| BTBD2      | 0.46635 | 1.0541  | 0.288 | 0.34 | 1 MS.Trt_vs_MS.NoTrt_B |
| TRIM35     | 0.46977 | -0.3151 | 0.166 | 0.18 | 1 MS.Trt_vs_MS.NoTrt_B |
| OR6K3      | 0.47297 | 0.29709 | 0.614 | 0.78 | 1 MS.Trt_vs_MS.NoTrt_B |
| BLM        | 0.4733  | 0.32488 | 0.218 | 0.2  | 1 MS.Trt_vs_MS.NoTrt_B |
| RFC2       | 0.47515 | 0.52993 | 0.584 | 0.65 | 1 MS.Trt_vs_MS.NoTrt_B |
| DDX49      | 0.47544 | -0.4568 | 0.12  | 0.14 | 1 MS.Trt_vs_MS.NoTrt_B |
| BTBD19     | 0.47643 | 0.47584 | 0.627 | 0.61 | 1 MS.Trt_vs_MS.NoTrt_B |
| H3F3B      | 0.4771  | 0.29341 | 0.786 | 0.96 | 1 MS.Trt_vs_MS.NoTrt_B |
| DAZAP2     | 0.48048 | 0.37226 | 0.817 | 0.92 | 1 MS.Trt_vs_MS.NoTrt_B |

|            |         |         |       |      |                        |
|------------|---------|---------|-------|------|------------------------|
| CNOT6      | 0.48089 | 1.33651 | 0.089 | 0.11 | 1 MS.Trt_vs_MS.NoTrt_B |
| TAF1       | 0.48137 | 0.57884 | 0.682 | 0.8  | 1 MS.Trt_vs_MS.NoTrt_B |
| RALGPS2    | 0.4814  | 0.92929 | 0.303 | 0.32 | 1 MS.Trt_vs_MS.NoTrt_B |
| HLTF       | 0.48256 | 1.12269 | 0.399 | 0.44 | 1 MS.Trt_vs_MS.NoTrt_B |
| JCHAIN     | 0.48297 | 0.49723 | 0.1   | 0.12 | 1 MS.Trt_vs_MS.NoTrt_B |
| STK17B     | 0.48365 | 0.75335 | 0.867 | 0.96 | 1 MS.Trt_vs_MS.NoTrt_B |
| TMEM17     | 0.4848  | 0.37061 | 0.416 | 0.49 | 1 MS.Trt_vs_MS.NoTrt_B |
| SEC61A2    | 0.48516 | 0.55616 | 0.085 | 0.1  | 1 MS.Trt_vs_MS.NoTrt_B |
| ZNF547     | 0.48583 | 1.41482 | 0.174 | 0.21 | 1 MS.Trt_vs_MS.NoTrt_B |
| UGCG       | 0.48646 | 0.3519  | 0.15  | 0.17 | 1 MS.Trt_vs_MS.NoTrt_B |
| NFU1       | 0.48702 | -0.291  | 0.111 | 0.13 | 1 MS.Trt_vs_MS.NoTrt_B |
| TRIOBP     | 0.48732 | 0.96256 | 0.285 | 0.27 | 1 MS.Trt_vs_MS.NoTrt_B |
| NOMO2      | 0.48932 | 0.96327 | 0.153 | 0.18 | 1 MS.Trt_vs_MS.NoTrt_B |
| ARF6       | 0.48997 | 0.9823  | 0.614 | 0.64 | 1 MS.Trt_vs_MS.NoTrt_B |
| VRK1       | 0.49074 | 0.41683 | 0.179 | 0.2  | 1 MS.Trt_vs_MS.NoTrt_B |
| CYB5D1     | 0.49092 | -0.772  | 0.111 | 0.13 | 1 MS.Trt_vs_MS.NoTrt_B |
| XPO4       | 0.49153 | 1.4607  | 0.102 | 0.12 | 1 MS.Trt_vs_MS.NoTrt_B |
| ZNF248     | 0.49189 | 0.63708 | 0.096 | 0.11 | 1 MS.Trt_vs_MS.NoTrt_B |
| RBMX       | 0.49408 | 0.56161 | 0.664 | 0.71 | 1 MS.Trt_vs_MS.NoTrt_B |
| GSE1       | 0.49452 | 0.62296 | 0.279 | 0.32 | 1 MS.Trt_vs_MS.NoTrt_B |
| TTLL9      | 0.49561 | 0.29591 | 0.27  | 0.24 | 1 MS.Trt_vs_MS.NoTrt_B |
| G6PC3      | 0.49626 | 0.46764 | 0.736 | 0.77 | 1 MS.Trt_vs_MS.NoTrt_B |
| SEPSECS    | 0.49806 | 0.27603 | 0.68  | 0.8  | 1 MS.Trt_vs_MS.NoTrt_B |
| CTD-2369P2 | 0.49863 | 0.46762 | 0.251 | 0.24 | 1 MS.Trt_vs_MS.NoTrt_B |
| SYF2       | 0.49954 | 0.62668 | 0.375 | 0.42 | 1 MS.Trt_vs_MS.NoTrt_B |
| GAS7       | 0.49999 | 0.40933 | 0.505 | 0.56 | 1 MS.Trt_vs_MS.NoTrt_B |
| CFAP54     | 0.50006 | 0.28553 | 0.802 | 0.96 | 1 MS.Trt_vs_MS.NoTrt_B |
| PHLDB2     | 0.50021 | 1.44714 | 0.366 | 0.41 | 1 MS.Trt_vs_MS.NoTrt_B |
| 1-Mar      | 0.50172 | 1.42505 | 0.264 | 0.25 | 1 MS.Trt_vs_MS.NoTrt_B |
| FOXM1      | 0.50204 | -0.2558 | 0.606 | 0.68 | 1 MS.Trt_vs_MS.NoTrt_B |
| CCDC192    | 0.50206 | 0.71643 | 0.096 | 0.11 | 1 MS.Trt_vs_MS.NoTrt_B |
| PLA2G4E    | 0.50244 | 0.42441 | 0.109 | 0.09 | 1 MS.Trt_vs_MS.NoTrt_B |
| ZNF257     | 0.50251 | 1.00142 | 0.451 | 0.5  | 1 MS.Trt_vs_MS.NoTrt_B |
| BAP1       | 0.5028  | 0.43084 | 0.275 | 0.24 | 1 MS.Trt_vs_MS.NoTrt_B |
| PLA2G4B    | 0.50402 | 0.77198 | 0.379 | 0.43 | 1 MS.Trt_vs_MS.NoTrt_B |
| MCM10      | 0.50402 | 0.28953 | 0.314 | 0.37 | 1 MS.Trt_vs_MS.NoTrt_B |
| FANCI      | 0.50416 | -0.6289 | 0.497 | 0.51 | 1 MS.Trt_vs_MS.NoTrt_B |
| SRPK1      | 0.50432 | 0.32248 | 0.17  | 0.2  | 1 MS.Trt_vs_MS.NoTrt_B |
| CASS4      | 0.50446 | 0.51372 | 0.353 | 0.39 | 1 MS.Trt_vs_MS.NoTrt_B |
| SCN2B      | 0.5052  | -0.7552 | 0.246 | 0.27 | 1 MS.Trt_vs_MS.NoTrt_B |

|            |         |         |       |      |                        |
|------------|---------|---------|-------|------|------------------------|
| TMC2       | 0.50608 | 0.30931 | 0.481 | 0.57 | 1 MS.Trt_vs_MS.NoTrt_B |
| IFI27L2    | 0.50623 | 1.15906 | 0.129 | 0.15 | 1 MS.Trt_vs_MS.NoTrt_B |
| CCDC40     | 0.50731 | 0.25476 | 0.741 | 0.75 | 1 MS.Trt_vs_MS.NoTrt_B |
| SLC30A5    | 0.50848 | 0.62422 | 0.643 | 0.71 | 1 MS.Trt_vs_MS.NoTrt_B |
| GABBR1     | 0.50968 | 0.35276 | 0.144 | 0.17 | 1 MS.Trt_vs_MS.NoTrt_B |
| ZBTB44     | 0.51067 | 0.67178 | 0.246 | 0.28 | 1 MS.Trt_vs_MS.NoTrt_B |
| MSH5       | 0.51112 | 0.36885 | 0.871 | 0.93 | 1 MS.Trt_vs_MS.NoTrt_B |
| CKAP5      | 0.51127 | 0.76418 | 0.105 | 0.12 | 1 MS.Trt_vs_MS.NoTrt_B |
| GPLD1      | 0.51141 | -0.2594 | 0.634 | 0.63 | 1 MS.Trt_vs_MS.NoTrt_B |
| SH3RF2     | 0.51187 | -0.8092 | 0.155 | 0.14 | 1 MS.Trt_vs_MS.NoTrt_B |
| SPTLC3     | 0.51282 | 0.51061 | 0.42  | 0.51 | 1 MS.Trt_vs_MS.NoTrt_B |
| ITIH4      | 0.51338 | -0.8924 | 0.168 | 0.19 | 1 MS.Trt_vs_MS.NoTrt_B |
| METTL21A   | 0.51364 | 0.59876 | 0.863 | 0.97 | 1 MS.Trt_vs_MS.NoTrt_B |
| ICA1       | 0.51384 | 1.00581 | 0.444 | 0.54 | 1 MS.Trt_vs_MS.NoTrt_B |
| NAA20      | 0.51547 | 0.48483 | 0.135 | 0.16 | 1 MS.Trt_vs_MS.NoTrt_B |
| NDUFA12    | 0.51674 | 0.9463  | 0.22  | 0.27 | 1 MS.Trt_vs_MS.NoTrt_B |
| RP11-1070B | 0.51732 | 0.66289 | 0.111 | 0.13 | 1 MS.Trt_vs_MS.NoTrt_B |
| TRAPPC3L   | 0.51826 | 0.40909 | 0.464 | 0.58 | 1 MS.Trt_vs_MS.NoTrt_B |
| FBN1       | 0.51902 | 0.26278 | 0.298 | 0.35 | 1 MS.Trt_vs_MS.NoTrt_B |
| TRIM56     | 0.51988 | 0.65433 | 0.889 | 0.98 | 1 MS.Trt_vs_MS.NoTrt_B |
| SENP1      | 0.52005 | 0.68827 | 0.174 | 0.15 | 1 MS.Trt_vs_MS.NoTrt_B |
| TPRKB      | 0.52117 | 0.37123 | 0.397 | 0.43 | 1 MS.Trt_vs_MS.NoTrt_B |
| CCR7       | 0.52137 | 0.3959  | 0.499 | 0.57 | 1 MS.Trt_vs_MS.NoTrt_B |
| HECTD3     | 0.52139 | 1.11239 | 0.118 | 0.1  | 1 MS.Trt_vs_MS.NoTrt_B |
| ST3GAL6    | 0.52289 | 0.32225 | 0.233 | 0.23 | 1 MS.Trt_vs_MS.NoTrt_B |
| TERB1      | 0.52402 | 0.27763 | 0.551 | 0.6  | 1 MS.Trt_vs_MS.NoTrt_B |
| GALNT11    | 0.52483 | 0.28542 | 0.37  | 0.38 | 1 MS.Trt_vs_MS.NoTrt_B |
| UIMC1      | 0.52486 | 0.40203 | 0.725 | 0.82 | 1 MS.Trt_vs_MS.NoTrt_B |
| LARS2      | 0.52519 | -0.7591 | 0.403 | 0.42 | 1 MS.Trt_vs_MS.NoTrt_B |
| SAMD9      | 0.52522 | 0.40631 | 0.157 | 0.18 | 1 MS.Trt_vs_MS.NoTrt_B |
| ZCCHC10    | 0.52526 | 1.0214  | 0.486 | 0.56 | 1 MS.Trt_vs_MS.NoTrt_B |
| VPS11      | 0.5259  | 0.64064 | 0.712 | 0.79 | 1 MS.Trt_vs_MS.NoTrt_B |
| LONP1      | 0.52617 | 0.2888  | 0.497 | 0.46 | 1 MS.Trt_vs_MS.NoTrt_B |
| PITPNM2    | 0.52689 | 0.80644 | 0.322 | 0.37 | 1 MS.Trt_vs_MS.NoTrt_B |
| FAM135A    | 0.52696 | 0.58825 | 0.351 | 0.4  | 1 MS.Trt_vs_MS.NoTrt_B |
| RBFOX3     | 0.52702 | 0.27436 | 0.715 | 0.78 | 1 MS.Trt_vs_MS.NoTrt_B |
| CRY2       | 0.52726 | 0.47487 | 0.41  | 0.38 | 1 MS.Trt_vs_MS.NoTrt_B |
| DGKD       | 0.52761 | 0.44496 | 0.527 | 0.57 | 1 MS.Trt_vs_MS.NoTrt_B |
| CACNA1F    | 0.52907 | 0.27538 | 0.192 | 0.22 | 1 MS.Trt_vs_MS.NoTrt_B |
| ZNF736     | 0.52984 | -0.5752 | 0.423 | 0.47 | 1 MS.Trt_vs_MS.NoTrt_B |

|            |         |         |       |      |                        |
|------------|---------|---------|-------|------|------------------------|
| CXorf57    | 0.53016 | 1.14679 | 0.109 | 0.09 | 1 MS.Trt_vs_MS.NoTrt_B |
| TENM1      | 0.5323  | 1.59715 | 0.085 | 0.1  | 1 MS.Trt_vs_MS.NoTrt_B |
| PRKCZ      | 0.53261 | -0.3461 | 0.187 | 0.21 | 1 MS.Trt_vs_MS.NoTrt_B |
| C1orf50    | 0.53386 | 0.26774 | 0.577 | 0.64 | 1 MS.Trt_vs_MS.NoTrt_B |
| RNF144A    | 0.53396 | 0.49514 | 0.133 | 0.15 | 1 MS.Trt_vs_MS.NoTrt_B |
| U2SURP     | 0.53442 | 0.51002 | 0.292 | 0.34 | 1 MS.Trt_vs_MS.NoTrt_B |
| THRA       | 0.53701 | 0.69958 | 0.087 | 0.1  | 1 MS.Trt_vs_MS.NoTrt_B |
| ADHFE1     | 0.53714 | 0.46492 | 0.12  | 0.14 | 1 MS.Trt_vs_MS.NoTrt_B |
| ST20-MTHFS | 0.53819 | 0.59285 | 0.085 | 0.1  | 1 MS.Trt_vs_MS.NoTrt_B |
| NUP155     | 0.53842 | 0.63662 | 0.804 | 0.89 | 1 MS.Trt_vs_MS.NoTrt_B |
| OXCT1      | 0.53949 | -0.2987 | 0.312 | 0.35 | 1 MS.Trt_vs_MS.NoTrt_B |
| HAVCR1     | 0.54088 | 0.50681 | 0.301 | 0.33 | 1 MS.Trt_vs_MS.NoTrt_B |
| SMARCAD1   | 0.54192 | 0.66867 | 0.1   | 0.12 | 1 MS.Trt_vs_MS.NoTrt_B |
| NMUR1      | 0.54331 | 0.28689 | 0.434 | 0.42 | 1 MS.Trt_vs_MS.NoTrt_B |
| SLC16A5    | 0.54348 | 0.63923 | 0.107 | 0.12 | 1 MS.Trt_vs_MS.NoTrt_B |
| BTBD8      | 0.54374 | 1.26915 | 0.288 | 0.27 | 1 MS.Trt_vs_MS.NoTrt_B |
| TIGD5      | 0.54579 | 1.0604  | 0.155 | 0.17 | 1 MS.Trt_vs_MS.NoTrt_B |
| ZNF114     | 0.54731 | 0.26858 | 0.377 | 0.43 | 1 MS.Trt_vs_MS.NoTrt_B |
| ZNF622     | 0.54743 | 0.72736 | 0.102 | 0.12 | 1 MS.Trt_vs_MS.NoTrt_B |
| DHPS       | 0.54829 | 0.2822  | 0.224 | 0.25 | 1 MS.Trt_vs_MS.NoTrt_B |
| DNAJB5     | 0.54871 | -1.3256 | 0.129 | 0.15 | 1 MS.Trt_vs_MS.NoTrt_B |
| PRR5       | 0.54924 | 0.67121 | 0.436 | 0.48 | 1 MS.Trt_vs_MS.NoTrt_B |
| ANKLE1     | 0.54969 | 0.48643 | 0.157 | 0.14 | 1 MS.Trt_vs_MS.NoTrt_B |
| MELK       | 0.55011 | 0.36854 | 0.423 | 0.48 | 1 MS.Trt_vs_MS.NoTrt_B |
| ITM2C      | 0.55125 | 0.51185 | 0.092 | 0.11 | 1 MS.Trt_vs_MS.NoTrt_B |
| PUM3       | 0.55329 | 0.35394 | 0.137 | 0.12 | 1 MS.Trt_vs_MS.NoTrt_B |
| TWISTNB    | 0.55411 | 0.66079 | 0.087 | 0.1  | 1 MS.Trt_vs_MS.NoTrt_B |
| G2E3       | 0.55424 | 0.68448 | 0.46  | 0.5  | 1 MS.Trt_vs_MS.NoTrt_B |
| RARS       | 0.55542 | 0.29649 | 0.414 | 0.43 | 1 MS.Trt_vs_MS.NoTrt_B |
| CYB5D2     | 0.5557  | 0.31271 | 0.346 | 0.4  | 1 MS.Trt_vs_MS.NoTrt_B |
| DPH3       | 0.55589 | -0.2953 | 0.174 | 0.19 | 1 MS.Trt_vs_MS.NoTrt_B |
| EYS        | 0.55735 | 0.40714 | 0.634 | 0.77 | 1 MS.Trt_vs_MS.NoTrt_B |
| SLC12A4    | 0.55749 | -0.5575 | 0.142 | 0.12 | 1 MS.Trt_vs_MS.NoTrt_B |
| ATG3       | 0.55817 | 0.25401 | 0.364 | 0.36 | 1 MS.Trt_vs_MS.NoTrt_B |
| SLC25A42   | 0.5588  | 0.88498 | 0.471 | 0.52 | 1 MS.Trt_vs_MS.NoTrt_B |
| TRAPPC4    | 0.55898 | 0.3594  | 0.837 | 0.92 | 1 MS.Trt_vs_MS.NoTrt_B |
| KCTD6      | 0.5592  | 0.37304 | 0.471 | 0.52 | 1 MS.Trt_vs_MS.NoTrt_B |
| NCDN       | 0.56249 | 0.43172 | 0.17  | 0.19 | 1 MS.Trt_vs_MS.NoTrt_B |
| NRDE2      | 0.56264 | 0.45205 | 0.695 | 0.72 | 1 MS.Trt_vs_MS.NoTrt_B |
| WDR75      | 0.56328 | 0.73609 | 0.255 | 0.27 | 1 MS.Trt_vs_MS.NoTrt_B |

|           |         |         |       |      |                        |
|-----------|---------|---------|-------|------|------------------------|
| REEP3     | 0.56476 | 1.29932 | 0.381 | 0.43 | 1 MS.Trt_vs_MS.NoTrt_B |
| C4orf19   | 0.56512 | 0.30396 | 0.654 | 0.76 | 1 MS.Trt_vs_MS.NoTrt_B |
| DVL3      | 0.56644 | 1.30105 | 0.229 | 0.26 | 1 MS.Trt_vs_MS.NoTrt_B |
| PHF19     | 0.56668 | 0.33713 | 0.118 | 0.14 | 1 MS.Trt_vs_MS.NoTrt_B |
| BCOR      | 0.56734 | 0.76097 | 0.087 | 0.1  | 1 MS.Trt_vs_MS.NoTrt_B |
| MAP2K6    | 0.56785 | 0.94443 | 0.285 | 0.32 | 1 MS.Trt_vs_MS.NoTrt_B |
| ITM2A     | 0.56845 | 0.5543  | 0.237 | 0.22 | 1 MS.Trt_vs_MS.NoTrt_B |
| E2F6      | 0.56974 | -0.8679 | 0.216 | 0.24 | 1 MS.Trt_vs_MS.NoTrt_B |
| STRN3     | 0.57006 | 1.03389 | 0.645 | 0.71 | 1 MS.Trt_vs_MS.NoTrt_B |
| PTRH2     | 0.5746  | 0.74765 | 0.107 | 0.12 | 1 MS.Trt_vs_MS.NoTrt_B |
| OFD1      | 0.57582 | 0.2687  | 0.216 | 0.24 | 1 MS.Trt_vs_MS.NoTrt_B |
| LSM10     | 0.57773 | 0.54727 | 0.111 | 0.1  | 1 MS.Trt_vs_MS.NoTrt_B |
| IFT88     | 0.57865 | 0.52646 | 0.425 | 0.47 | 1 MS.Trt_vs_MS.NoTrt_B |
| BOLL      | 0.57927 | 0.43324 | 0.142 | 0.13 | 1 MS.Trt_vs_MS.NoTrt_B |
| NCOA1     | 0.57961 | 0.35206 | 0.207 | 0.18 | 1 MS.Trt_vs_MS.NoTrt_B |
| ZNF696    | 0.58076 | 0.75    | 0.222 | 0.25 | 1 MS.Trt_vs_MS.NoTrt_B |
| CD226     | 0.58154 | 0.42659 | 0.429 | 0.45 | 1 MS.Trt_vs_MS.NoTrt_B |
| PLEKHA7   | 0.58172 | 0.95298 | 0.118 | 0.14 | 1 MS.Trt_vs_MS.NoTrt_B |
| FRMPD2    | 0.58341 | 0.45307 | 0.098 | 0.11 | 1 MS.Trt_vs_MS.NoTrt_B |
| IL17RC    | 0.5841  | 0.67955 | 0.327 | 0.3  | 1 MS.Trt_vs_MS.NoTrt_B |
| FAF2      | 0.58625 | 0.86289 | 0.098 | 0.11 | 1 MS.Trt_vs_MS.NoTrt_B |
| CRYGS     | 0.58702 | 1.21362 | 0.203 | 0.23 | 1 MS.Trt_vs_MS.NoTrt_B |
| ANO10     | 0.58723 | -0.8153 | 0.447 | 0.51 | 1 MS.Trt_vs_MS.NoTrt_B |
| PDZD8     | 0.58783 | 0.79306 | 0.246 | 0.22 | 1 MS.Trt_vs_MS.NoTrt_B |
| SPG7      | 0.58792 | 0.56594 | 0.95  | 0.98 | 1 MS.Trt_vs_MS.NoTrt_B |
| SVIL      | 0.5882  | 0.32024 | 0.102 | 0.12 | 1 MS.Trt_vs_MS.NoTrt_B |
| CCDC15    | 0.58826 | -1.2227 | 0.187 | 0.21 | 1 MS.Trt_vs_MS.NoTrt_B |
| REPS1     | 0.58892 | 0.65374 | 0.547 | 0.62 | 1 MS.Trt_vs_MS.NoTrt_B |
| GPANK1    | 0.58942 | 0.34574 | 0.257 | 0.25 | 1 MS.Trt_vs_MS.NoTrt_B |
| YPEL1     | 0.58952 | 0.30288 | 0.366 | 0.41 | 1 MS.Trt_vs_MS.NoTrt_B |
| FMN1      | 0.58986 | 0.53366 | 0.17  | 0.2  | 1 MS.Trt_vs_MS.NoTrt_B |
| MYH3      | 0.5899  | 0.30361 | 0.584 | 0.63 | 1 MS.Trt_vs_MS.NoTrt_B |
| PIK3R1    | 0.59033 | 0.54986 | 0.259 | 0.24 | 1 MS.Trt_vs_MS.NoTrt_B |
| TNFRSF10D | 0.59065 | 0.45588 | 0.087 | 0.1  | 1 MS.Trt_vs_MS.NoTrt_B |
| IFIT3     | 0.59163 | 0.36329 | 0.466 | 0.48 | 1 MS.Trt_vs_MS.NoTrt_B |
| SC5D      | 0.59457 | 0.60985 | 0.468 | 0.51 | 1 MS.Trt_vs_MS.NoTrt_B |
| LOXL2     | 0.59481 | 0.33463 | 0.632 | 0.73 | 1 MS.Trt_vs_MS.NoTrt_B |
| CDC42     | 0.59669 | 0.51864 | 0.806 | 0.95 | 1 MS.Trt_vs_MS.NoTrt_B |
| DPY19L4   | 0.59804 | 1.3106  | 0.427 | 0.45 | 1 MS.Trt_vs_MS.NoTrt_B |
| ADRB2     | 0.59814 | 1.11585 | 0.166 | 0.16 | 1 MS.Trt_vs_MS.NoTrt_B |

|            |         |         |       |      |                        |
|------------|---------|---------|-------|------|------------------------|
| SLC13A3    | 0.59938 | 0.51067 | 0.285 | 0.28 | 1 MS.Trt_vs_MS.NoTrt_B |
| ANKRD36    | 0.59984 | 0.6261  | 0.673 | 0.66 | 1 MS.Trt_vs_MS.NoTrt_B |
| ATP6V0B    | 0.60163 | 0.38794 | 0.148 | 0.17 | 1 MS.Trt_vs_MS.NoTrt_B |
| ORC4       | 0.60213 | 0.27225 | 0.904 | 1    | 1 MS.Trt_vs_MS.NoTrt_B |
| E4F1       | 0.60226 | 0.5545  | 0.107 | 0.09 | 1 MS.Trt_vs_MS.NoTrt_B |
| PNP        | 0.6026  | -0.6713 | 0.244 | 0.27 | 1 MS.Trt_vs_MS.NoTrt_B |
| GTF2H2C.2  | 0.60264 | 0.37705 | 0.248 | 0.27 | 1 MS.Trt_vs_MS.NoTrt_B |
| RPGRIP1L   | 0.60288 | 0.4628  | 0.59  | 0.7  | 1 MS.Trt_vs_MS.NoTrt_B |
| TCEAL8     | 0.6029  | 0.66555 | 0.105 | 0.12 | 1 MS.Trt_vs_MS.NoTrt_B |
| RPS19      | 0.60413 | 0.2588  | 0.913 | 1    | 1 MS.Trt_vs_MS.NoTrt_B |
| SIRPB1     | 0.60447 | 1.48362 | 0.176 | 0.21 | 1 MS.Trt_vs_MS.NoTrt_B |
| FNDC3B     | 0.60586 | 0.38153 | 0.662 | 0.64 | 1 MS.Trt_vs_MS.NoTrt_B |
| KHDRBS1    | 0.60605 | 0.62818 | 0.139 | 0.16 | 1 MS.Trt_vs_MS.NoTrt_B |
| EDEM3      | 0.61295 | 0.52147 | 0.27  | 0.29 | 1 MS.Trt_vs_MS.NoTrt_B |
| HAUS7      | 0.61299 | 0.93578 | 0.094 | 0.11 | 1 MS.Trt_vs_MS.NoTrt_B |
| FAM200B    | 0.61356 | 0.46497 | 0.307 | 0.34 | 1 MS.Trt_vs_MS.NoTrt_B |
| MED14      | 0.61488 | 0.78069 | 0.126 | 0.11 | 1 MS.Trt_vs_MS.NoTrt_B |
| AGBL2      | 0.61545 | 1.09508 | 0.218 | 0.25 | 1 MS.Trt_vs_MS.NoTrt_B |
| LRRC1      | 0.61586 | -0.4053 | 0.209 | 0.22 | 1 MS.Trt_vs_MS.NoTrt_B |
| C19orf35   | 0.61588 | 0.32091 | 0.255 | 0.28 | 1 MS.Trt_vs_MS.NoTrt_B |
| MTSS1      | 0.61676 | 0.89025 | 0.492 | 0.56 | 1 MS.Trt_vs_MS.NoTrt_B |
| RP4-635E18 | 0.61819 | 0.92441 | 0.259 | 0.3  | 1 MS.Trt_vs_MS.NoTrt_B |
| DPH7       | 0.61879 | 0.38967 | 0.279 | 0.3  | 1 MS.Trt_vs_MS.NoTrt_B |
| FAM168B    | 0.61913 | 1.05798 | 0.089 | 0.1  | 1 MS.Trt_vs_MS.NoTrt_B |
| TOB1       | 0.61935 | 0.68771 | 0.458 | 0.48 | 1 MS.Trt_vs_MS.NoTrt_B |
| FAM160A2   | 0.62173 | 0.46584 | 0.092 | 0.1  | 1 MS.Trt_vs_MS.NoTrt_B |
| CRIM1      | 0.62218 | 0.9648  | 0.115 | 0.13 | 1 MS.Trt_vs_MS.NoTrt_B |
| LMNTD1     | 0.62257 | 0.25289 | 0.329 | 0.31 | 1 MS.Trt_vs_MS.NoTrt_B |
| DSEL       | 0.62267 | 0.27623 | 0.54  | 0.6  | 1 MS.Trt_vs_MS.NoTrt_B |
| CTBS       | 0.62277 | 1.09202 | 0.126 | 0.14 | 1 MS.Trt_vs_MS.NoTrt_B |
| DNAH1      | 0.62568 | 0.79659 | 0.12  | 0.11 | 1 MS.Trt_vs_MS.NoTrt_B |
| NEURL1     | 0.62635 | 0.42656 | 0.203 | 0.22 | 1 MS.Trt_vs_MS.NoTrt_B |
| CNKSR1     | 0.62734 | -1.2978 | 0.137 | 0.15 | 1 MS.Trt_vs_MS.NoTrt_B |
| ICMT       | 0.62827 | 0.98198 | 0.527 | 0.55 | 1 MS.Trt_vs_MS.NoTrt_B |
| PIGU       | 0.62892 | 0.28606 | 0.092 | 0.1  | 1 MS.Trt_vs_MS.NoTrt_B |
| NBPF14     | 0.62937 | 0.62456 | 0.346 | 0.33 | 1 MS.Trt_vs_MS.NoTrt_B |
| TMEM182    | 0.62977 | 0.63043 | 0.625 | 0.79 | 1 MS.Trt_vs_MS.NoTrt_B |
| LENG8      | 0.62989 | 0.73266 | 0.603 | 0.75 | 1 MS.Trt_vs_MS.NoTrt_B |
| HAUS3      | 0.63192 | 0.29756 | 0.741 | 0.85 | 1 MS.Trt_vs_MS.NoTrt_B |
| UTP6       | 0.63303 | 0.41003 | 0.789 | 0.88 | 1 MS.Trt_vs_MS.NoTrt_B |



|         |         |         |       |      |                        |
|---------|---------|---------|-------|------|------------------------|
| TCERG1  | 0.63317 | 0.57357 | 0.246 | 0.28 | 1 MS.Trt_vs_MS.NoTrt_B |
| PTH2R   | 0.63427 | 0.33909 | 0.144 | 0.14 | 1 MS.Trt_vs_MS.NoTrt_B |
| LIAS    | 0.63436 | -0.4635 | 0.105 | 0.09 | 1 MS.Trt_vs_MS.NoTrt_B |
| PEX11B  | 0.63466 | 0.44493 | 0.105 | 0.12 | 1 MS.Trt_vs_MS.NoTrt_B |
| PELP1   | 0.63492 | 0.44558 | 0.222 | 0.24 | 1 MS.Trt_vs_MS.NoTrt_B |
| CALHM2  | 0.63715 | 0.28091 | 0.131 | 0.11 | 1 MS.Trt_vs_MS.NoTrt_B |
| USP31   | 0.63738 | 0.68105 | 0.094 | 0.11 | 1 MS.Trt_vs_MS.NoTrt_B |
| RYR3    | 0.63795 | -0.3059 | 0.388 | 0.38 | 1 MS.Trt_vs_MS.NoTrt_B |
| INTS7   | 0.63832 | 1.08711 | 0.377 | 0.36 | 1 MS.Trt_vs_MS.NoTrt_B |
| SBNO2   | 0.6427  | -0.6219 | 0.133 | 0.12 | 1 MS.Trt_vs_MS.NoTrt_B |
| RTTN    | 0.64289 | -0.4003 | 0.192 | 0.22 | 1 MS.Trt_vs_MS.NoTrt_B |
| CC2D2B  | 0.64325 | 0.48333 | 0.094 | 0.11 | 1 MS.Trt_vs_MS.NoTrt_B |
| USP8    | 0.64336 | 0.42898 | 0.963 | 0.99 | 1 MS.Trt_vs_MS.NoTrt_B |
| ZNF236  | 0.6435  | 0.59915 | 0.111 | 0.12 | 1 MS.Trt_vs_MS.NoTrt_B |
| NBPF19  | 0.64452 | 0.40461 | 0.344 | 0.36 | 1 MS.Trt_vs_MS.NoTrt_B |
| FRMD8   | 0.64508 | -0.2531 | 0.501 | 0.58 | 1 MS.Trt_vs_MS.NoTrt_B |
| FANCC   | 0.64616 | -0.8816 | 0.214 | 0.22 | 1 MS.Trt_vs_MS.NoTrt_B |
| IL2ORB  | 0.6468  | 0.43972 | 0.194 | 0.22 | 1 MS.Trt_vs_MS.NoTrt_B |
| FAM174B | 0.64683 | -0.4612 | 0.109 | 0.1  | 1 MS.Trt_vs_MS.NoTrt_B |
| STXBP5  | 0.64795 | 0.77498 | 0.142 | 0.16 | 1 MS.Trt_vs_MS.NoTrt_B |
| GATM    | 0.64909 | 0.28559 | 0.192 | 0.18 | 1 MS.Trt_vs_MS.NoTrt_B |
| ZNF658  | 0.64935 | 1.31162 | 0.163 | 0.18 | 1 MS.Trt_vs_MS.NoTrt_B |
| SCN7A   | 0.65026 | 0.29789 | 0.438 | 0.44 | 1 MS.Trt_vs_MS.NoTrt_B |
| ZNF584  | 0.65068 | 0.48974 | 0.58  | 0.65 | 1 MS.Trt_vs_MS.NoTrt_B |
| H2AFY   | 0.65083 | 0.29128 | 0.2   | 0.22 | 1 MS.Trt_vs_MS.NoTrt_B |
| FAM110D | 0.65087 | 0.31035 | 0.39  | 0.44 | 1 MS.Trt_vs_MS.NoTrt_B |
| ZNF610  | 0.65109 | -0.3741 | 0.312 | 0.33 | 1 MS.Trt_vs_MS.NoTrt_B |
| EFCAB14 | 0.65296 | 0.36164 | 0.22  | 0.24 | 1 MS.Trt_vs_MS.NoTrt_B |
| OSBP2   | 0.65385 | -0.9307 | 0.32  | 0.35 | 1 MS.Trt_vs_MS.NoTrt_B |
| R3HDM1  | 0.65423 | 0.57749 | 0.763 | 0.84 | 1 MS.Trt_vs_MS.NoTrt_B |
| LBHD1   | 0.6544  | 0.91538 | 0.383 | 0.39 | 1 MS.Trt_vs_MS.NoTrt_B |
| FGF13   | 0.6544  | 0.2538  | 0.817 | 0.95 | 1 MS.Trt_vs_MS.NoTrt_B |
| SH2D2A  | 0.65559 | 0.7924  | 0.155 | 0.15 | 1 MS.Trt_vs_MS.NoTrt_B |
| PPM1L   | 0.65703 | -0.5725 | 0.187 | 0.2  | 1 MS.Trt_vs_MS.NoTrt_B |
| TTLL7   | 0.65842 | 0.32214 | 0.693 | 0.77 | 1 MS.Trt_vs_MS.NoTrt_B |
| ZNF660  | 0.65974 | 0.30909 | 0.481 | 0.51 | 1 MS.Trt_vs_MS.NoTrt_B |
| IFIT1   | 0.65994 | 0.4214  | 0.192 | 0.18 | 1 MS.Trt_vs_MS.NoTrt_B |
| ZNF678  | 0.66011 | -0.9034 | 0.124 | 0.14 | 1 MS.Trt_vs_MS.NoTrt_B |
| NIPAL2  | 0.66025 | 0.65915 | 0.257 | 0.28 | 1 MS.Trt_vs_MS.NoTrt_B |
| BRD7    | 0.6615  | 1.81169 | 0.447 | 0.52 | 1 MS.Trt_vs_MS.NoTrt_B |

|            |         |         |       |      |                        |
|------------|---------|---------|-------|------|------------------------|
| OGG1       | 0.66231 | 0.47675 | 0.32  | 0.34 | 1 MS.Trt_vs_MS.NoTrt_B |
| DDX51      | 0.66255 | -0.2947 | 0.553 | 0.6  | 1 MS.Trt_vs_MS.NoTrt_B |
| MAP3K3     | 0.66416 | 0.93422 | 0.148 | 0.14 | 1 MS.Trt_vs_MS.NoTrt_B |
| ZFYVE21    | 0.66591 | 0.7511  | 0.599 | 0.66 | 1 MS.Trt_vs_MS.NoTrt_B |
| IGF2R      | 0.66607 | 0.87844 | 0.338 | 0.32 | 1 MS.Trt_vs_MS.NoTrt_B |
| CTD-3105H1 | 0.66694 | 0.25329 | 0.222 | 0.24 | 1 MS.Trt_vs_MS.NoTrt_B |
| PABPN1     | 0.66703 | 0.91306 | 0.168 | 0.16 | 1 MS.Trt_vs_MS.NoTrt_B |
| PPT2       | 0.66996 | -0.4116 | 0.427 | 0.51 | 1 MS.Trt_vs_MS.NoTrt_B |
| UBAP1      | 0.67193 | 0.44487 | 0.111 | 0.12 | 1 MS.Trt_vs_MS.NoTrt_B |
| TCF7L1     | 0.67196 | 0.45936 | 0.556 | 0.61 | 1 MS.Trt_vs_MS.NoTrt_B |
| ADGRG1     | 0.67208 | 0.97888 | 0.58  | 0.65 | 1 MS.Trt_vs_MS.NoTrt_B |
| KLRK1      | 0.67362 | 1.66856 | 0.582 | 0.62 | 1 MS.Trt_vs_MS.NoTrt_B |
| KMT2B      | 0.67372 | 0.61924 | 0.196 | 0.22 | 1 MS.Trt_vs_MS.NoTrt_B |
| RBPMS      | 0.67637 | 1.19329 | 0.092 | 0.1  | 1 MS.Trt_vs_MS.NoTrt_B |
| SDSL       | 0.67719 | 0.25201 | 0.259 | 0.29 | 1 MS.Trt_vs_MS.NoTrt_B |
| VSTM1      | 0.67853 | 0.31151 | 0.231 | 0.25 | 1 MS.Trt_vs_MS.NoTrt_B |
| CSMD2      | 0.67966 | -0.2571 | 0.261 | 0.25 | 1 MS.Trt_vs_MS.NoTrt_B |
| C5orf24    | 0.67974 | -0.6344 | 0.303 | 0.32 | 1 MS.Trt_vs_MS.NoTrt_B |
| UTP14A     | 0.68077 | -0.352  | 0.15  | 0.16 | 1 MS.Trt_vs_MS.NoTrt_B |
| ADAM28     | 0.68212 | 0.58883 | 0.115 | 0.13 | 1 MS.Trt_vs_MS.NoTrt_B |
| FAM216A    | 0.68302 | 0.55465 | 0.449 | 0.51 | 1 MS.Trt_vs_MS.NoTrt_B |
| TP53BP1    | 0.68332 | 0.61779 | 0.222 | 0.24 | 1 MS.Trt_vs_MS.NoTrt_B |
| NPIPA5     | 0.68413 | 0.43615 | 0.107 | 0.1  | 1 MS.Trt_vs_MS.NoTrt_B |
| ABC7-42404 | 0.68464 | -0.3225 | 0.59  | 0.63 | 1 MS.Trt_vs_MS.NoTrt_B |
| COL15A1    | 0.68591 | 0.30149 | 0.261 | 0.26 | 1 MS.Trt_vs_MS.NoTrt_B |
| TRIM36     | 0.68625 | 0.27396 | 0.316 | 0.31 | 1 MS.Trt_vs_MS.NoTrt_B |
| HDAC5      | 0.68668 | 0.35675 | 0.22  | 0.24 | 1 MS.Trt_vs_MS.NoTrt_B |
| ABCB8      | 0.69001 | -0.7411 | 0.505 | 0.5  | 1 MS.Trt_vs_MS.NoTrt_B |
| DIRC1      | 0.69127 | 0.57553 | 0.139 | 0.13 | 1 MS.Trt_vs_MS.NoTrt_B |
| ZNF528     | 0.6914  | 0.26315 | 0.471 | 0.51 | 1 MS.Trt_vs_MS.NoTrt_B |
| RBBP6      | 0.69256 | 0.79175 | 0.211 | 0.23 | 1 MS.Trt_vs_MS.NoTrt_B |
| SLC5A5     | 0.69312 | 1.38984 | 0.364 | 0.36 | 1 MS.Trt_vs_MS.NoTrt_B |
| EI24       | 0.69343 | 0.51152 | 0.632 | 0.72 | 1 MS.Trt_vs_MS.NoTrt_B |
| FADS6      | 0.69347 | 0.3028  | 0.492 | 0.52 | 1 MS.Trt_vs_MS.NoTrt_B |
| UBE2S      | 0.6947  | 0.41924 | 0.571 | 0.66 | 1 MS.Trt_vs_MS.NoTrt_B |
| CALB1      | 0.69488 | 0.44084 | 0.1   | 0.11 | 1 MS.Trt_vs_MS.NoTrt_B |
| RNF43      | 0.69514 | 1.03536 | 0.279 | 0.27 | 1 MS.Trt_vs_MS.NoTrt_B |
| MT-CO3     | 0.69568 | 0.79005 | 0.59  | 0.72 | 1 MS.Trt_vs_MS.NoTrt_B |
| OLR1       | 0.69725 | 0.2812  | 0.333 | 0.37 | 1 MS.Trt_vs_MS.NoTrt_B |
| UBTF       | 0.6973  | 0.59257 | 0.209 | 0.2  | 1 MS.Trt_vs_MS.NoTrt_B |

|           |         |         |       |      |                        |
|-----------|---------|---------|-------|------|------------------------|
| MTHFS     | 0.69752 | 1.2853  | 0.124 | 0.11 | 1 MS.Trt_vs_MS.NoTrt_B |
| XPOT      | 0.69804 | 0.74182 | 0.381 | 0.41 | 1 MS.Trt_vs_MS.NoTrt_B |
| RFX7      | 0.70109 | 0.55014 | 0.148 | 0.16 | 1 MS.Trt_vs_MS.NoTrt_B |
| ATP2A2    | 0.70129 | 0.28758 | 0.632 | 0.67 | 1 MS.Trt_vs_MS.NoTrt_B |
| ATXN2L    | 0.70245 | 0.44807 | 0.214 | 0.23 | 1 MS.Trt_vs_MS.NoTrt_B |
| TMEM143   | 0.70671 | -0.7096 | 0.438 | 0.48 | 1 MS.Trt_vs_MS.NoTrt_B |
| GIPC1     | 0.70682 | 0.38328 | 0.407 | 0.43 | 1 MS.Trt_vs_MS.NoTrt_B |
| TUT1      | 0.70725 | -0.4378 | 0.122 | 0.11 | 1 MS.Trt_vs_MS.NoTrt_B |
| DDI2      | 0.70764 | 0.4053  | 0.708 | 0.7  | 1 MS.Trt_vs_MS.NoTrt_B |
| RIOK2     | 0.7084  | 0.84507 | 0.272 | 0.27 | 1 MS.Trt_vs_MS.NoTrt_B |
| N4BP1     | 0.71178 | 0.77758 | 0.092 | 0.1  | 1 MS.Trt_vs_MS.NoTrt_B |
| TMEM204   | 0.71281 | 0.83447 | 0.139 | 0.13 | 1 MS.Trt_vs_MS.NoTrt_B |
| DNAJC5B   | 0.71284 | 0.2528  | 0.438 | 0.45 | 1 MS.Trt_vs_MS.NoTrt_B |
| MTMR2     | 0.71331 | -0.3428 | 0.133 | 0.15 | 1 MS.Trt_vs_MS.NoTrt_B |
| ABCC2     | 0.7139  | 0.5666  | 0.444 | 0.51 | 1 MS.Trt_vs_MS.NoTrt_B |
| ANKRD26   | 0.71422 | -0.757  | 0.105 | 0.11 | 1 MS.Trt_vs_MS.NoTrt_B |
| DNAJC4    | 0.71584 | 0.29143 | 0.105 | 0.11 | 1 MS.Trt_vs_MS.NoTrt_B |
| TIGD6     | 0.72012 | 1.17715 | 0.15  | 0.14 | 1 MS.Trt_vs_MS.NoTrt_B |
| FAM65C    | 0.72048 | 0.28988 | 0.301 | 0.34 | 1 MS.Trt_vs_MS.NoTrt_B |
| STEAP2    | 0.72516 | 0.37267 | 0.601 | 0.69 | 1 MS.Trt_vs_MS.NoTrt_B |
| MAB21L3   | 0.72615 | 0.39573 | 0.275 | 0.28 | 1 MS.Trt_vs_MS.NoTrt_B |
| CCDC82    | 0.72653 | 0.949   | 0.129 | 0.14 | 1 MS.Trt_vs_MS.NoTrt_B |
| HMGCR     | 0.72661 | 0.58607 | 0.573 | 0.61 | 1 MS.Trt_vs_MS.NoTrt_B |
| GRK7      | 0.72765 | 0.27962 | 0.261 | 0.27 | 1 MS.Trt_vs_MS.NoTrt_B |
| ZNF850    | 0.72862 | 0.36389 | 0.834 | 0.88 | 1 MS.Trt_vs_MS.NoTrt_B |
| TNFRSF13C | 0.72903 | 0.95607 | 0.538 | 0.58 | 1 MS.Trt_vs_MS.NoTrt_B |
| ASB3      | 0.72969 | 0.39186 | 0.821 | 0.94 | 1 MS.Trt_vs_MS.NoTrt_B |
| SLC25A45  | 0.7299  | 0.25577 | 0.939 | 0.99 | 1 MS.Trt_vs_MS.NoTrt_B |
| PDE7B     | 0.73045 | 0.3044  | 0.309 | 0.34 | 1 MS.Trt_vs_MS.NoTrt_B |
| ROBO4     | 0.73113 | 0.29687 | 0.146 | 0.14 | 1 MS.Trt_vs_MS.NoTrt_B |
| ANKRA2    | 0.73197 | 1.02461 | 0.098 | 0.11 | 1 MS.Trt_vs_MS.NoTrt_B |
| ODF2L     | 0.73407 | 0.37212 | 0.865 | 0.92 | 1 MS.Trt_vs_MS.NoTrt_B |
| LSM2      | 0.73423 | 0.47833 | 0.118 | 0.13 | 1 MS.Trt_vs_MS.NoTrt_B |
| SPDYE2B   | 0.73432 | 0.96081 | 0.235 | 0.27 | 1 MS.Trt_vs_MS.NoTrt_B |
| KCTD13    | 0.73604 | 0.45205 | 0.109 | 0.12 | 1 MS.Trt_vs_MS.NoTrt_B |
| ST20      | 0.73651 | 0.431   | 0.159 | 0.17 | 1 MS.Trt_vs_MS.NoTrt_B |
| CASP9     | 0.73794 | 0.68668 | 0.264 | 0.28 | 1 MS.Trt_vs_MS.NoTrt_B |
| CTTNBP2NL | 0.74    | 0.25296 | 0.336 | 0.34 | 1 MS.Trt_vs_MS.NoTrt_B |
| LLGL1     | 0.74082 | -1.0642 | 0.209 | 0.2  | 1 MS.Trt_vs_MS.NoTrt_B |
| ZKSCAN1   | 0.74087 | 0.31884 | 0.863 | 0.92 | 1 MS.Trt_vs_MS.NoTrt_B |

|          |         |         |       |      |                        |
|----------|---------|---------|-------|------|------------------------|
| CACNB2   | 0.7409  | 0.62669 | 0.366 | 0.4  | 1 MS.Trt_vs_MS.NoTrt_B |
| TDGF1    | 0.7414  | 0.33026 | 0.464 | 0.5  | 1 MS.Trt_vs_MS.NoTrt_B |
| FAM178B  | 0.74207 | 0.28515 | 0.586 | 0.6  | 1 MS.Trt_vs_MS.NoTrt_B |
| MOSPD2   | 0.74217 | 0.51943 | 0.179 | 0.19 | 1 MS.Trt_vs_MS.NoTrt_B |
| PUS3     | 0.74227 | -0.2717 | 0.301 | 0.32 | 1 MS.Trt_vs_MS.NoTrt_B |
| MCM4     | 0.74235 | -0.2981 | 0.508 | 0.54 | 1 MS.Trt_vs_MS.NoTrt_B |
| ZFYVE16  | 0.74241 | 1.05478 | 0.826 | 0.88 | 1 MS.Trt_vs_MS.NoTrt_B |
| RBM44    | 0.74274 | 0.46114 | 0.174 | 0.2  | 1 MS.Trt_vs_MS.NoTrt_B |
| ORC6     | 0.74542 | 0.47326 | 0.911 | 0.97 | 1 MS.Trt_vs_MS.NoTrt_B |
| ABCA2    | 0.74853 | 1.17059 | 0.207 | 0.23 | 1 MS.Trt_vs_MS.NoTrt_B |
| TMEM221  | 0.75071 | 0.54064 | 0.159 | 0.17 | 1 MS.Trt_vs_MS.NoTrt_B |
| NOMO1    | 0.75076 | -0.6236 | 0.111 | 0.12 | 1 MS.Trt_vs_MS.NoTrt_B |
| CPSF6    | 0.75366 | 0.69903 | 0.39  | 0.42 | 1 MS.Trt_vs_MS.NoTrt_B |
| MED11    | 0.75766 | 0.77454 | 0.599 | 0.62 | 1 MS.Trt_vs_MS.NoTrt_B |
| 11-Sep   | 0.75955 | 0.71952 | 0.303 | 0.32 | 1 MS.Trt_vs_MS.NoTrt_B |
| TRAPPC13 | 0.76091 | -0.372  | 0.148 | 0.16 | 1 MS.Trt_vs_MS.NoTrt_B |
| PIK3R4   | 0.76176 | 0.29321 | 0.111 | 0.12 | 1 MS.Trt_vs_MS.NoTrt_B |
| TBCCD1   | 0.76234 | 0.32609 | 0.279 | 0.28 | 1 MS.Trt_vs_MS.NoTrt_B |
| GIMAP5   | 0.76246 | 0.42361 | 0.407 | 0.41 | 1 MS.Trt_vs_MS.NoTrt_B |
| TMEM120B | 0.76332 | 0.2514  | 0.889 | 0.97 | 1 MS.Trt_vs_MS.NoTrt_B |
| MRPL37   | 0.76514 | 0.51962 | 0.159 | 0.17 | 1 MS.Trt_vs_MS.NoTrt_B |
| ZDHHC2   | 0.76516 | 0.7913  | 0.144 | 0.14 | 1 MS.Trt_vs_MS.NoTrt_B |
| ZNF14    | 0.76692 | 2.74509 | 0.307 | 0.34 | 1 MS.Trt_vs_MS.NoTrt_B |
| TANC2    | 0.76765 | 1.0413  | 0.183 | 0.2  | 1 MS.Trt_vs_MS.NoTrt_B |
| FRS3     | 0.76814 | 1.76625 | 0.266 | 0.27 | 1 MS.Trt_vs_MS.NoTrt_B |
| ZKSCAN7  | 0.76851 | -0.2521 | 0.516 | 0.53 | 1 MS.Trt_vs_MS.NoTrt_B |
| PPFIBP2  | 0.77079 | 0.47563 | 0.187 | 0.18 | 1 MS.Trt_vs_MS.NoTrt_B |
| IRAK1    | 0.77133 | 0.27661 | 0.166 | 0.17 | 1 MS.Trt_vs_MS.NoTrt_B |
| HVCN1    | 0.77223 | 0.62822 | 0.386 | 0.42 | 1 MS.Trt_vs_MS.NoTrt_B |
| RASSF3   | 0.77248 | 0.85284 | 0.645 | 0.81 | 1 MS.Trt_vs_MS.NoTrt_B |
| OSBPL6   | 0.77406 | 0.25227 | 0.486 | 0.55 | 1 MS.Trt_vs_MS.NoTrt_B |
| DIEXF    | 0.77475 | -0.3161 | 0.431 | 0.41 | 1 MS.Trt_vs_MS.NoTrt_B |
| RRP8     | 0.77498 | 0.50582 | 0.458 | 0.47 | 1 MS.Trt_vs_MS.NoTrt_B |
| ZNF578   | 0.77562 | 0.36415 | 0.88  | 0.94 | 1 MS.Trt_vs_MS.NoTrt_B |
| WBP2NL   | 0.77581 | 0.75655 | 0.322 | 0.34 | 1 MS.Trt_vs_MS.NoTrt_B |
| KLHL7    | 0.77993 | 0.73149 | 0.599 | 0.67 | 1 MS.Trt_vs_MS.NoTrt_B |
| ATOX1    | 0.78006 | 0.43806 | 0.146 | 0.14 | 1 MS.Trt_vs_MS.NoTrt_B |
| WSB2     | 0.78033 | 0.64498 | 0.688 | 0.81 | 1 MS.Trt_vs_MS.NoTrt_B |
| ATN1     | 0.78053 | 0.38108 | 0.115 | 0.12 | 1 MS.Trt_vs_MS.NoTrt_B |
| MFSD12   | 0.78221 | 1.03298 | 0.22  | 0.23 | 1 MS.Trt_vs_MS.NoTrt_B |

|            |         |         |       |      |                        |
|------------|---------|---------|-------|------|------------------------|
| DAXX       | 0.78373 | 0.51393 | 0.19  | 0.2  | 1 MS.Trt_vs_MS.NoTrt_B |
| ZNF430     | 0.78395 | 0.61117 | 0.832 | 0.92 | 1 MS.Trt_vs_MS.NoTrt_B |
| GNE        | 0.78458 | 0.34138 | 0.163 | 0.17 | 1 MS.Trt_vs_MS.NoTrt_B |
| LRRC2      | 0.78466 | 1.05151 | 0.632 | 0.68 | 1 MS.Trt_vs_MS.NoTrt_B |
| FAXC       | 0.78613 | 0.3126  | 0.246 | 0.28 | 1 MS.Trt_vs_MS.NoTrt_B |
| DSG2       | 0.78688 | 0.26222 | 0.362 | 0.38 | 1 MS.Trt_vs_MS.NoTrt_B |
| CHID1      | 0.79009 | 0.4482  | 0.231 | 0.24 | 1 MS.Trt_vs_MS.NoTrt_B |
| TACO1      | 0.79016 | 0.49091 | 0.309 | 0.32 | 1 MS.Trt_vs_MS.NoTrt_B |
| GBA2       | 0.79092 | 0.453   | 0.564 | 0.59 | 1 MS.Trt_vs_MS.NoTrt_B |
| DUSP11     | 0.79171 | 0.43191 | 0.523 | 0.48 | 1 MS.Trt_vs_MS.NoTrt_B |
| SESN3      | 0.79195 | 1.11228 | 0.233 | 0.25 | 1 MS.Trt_vs_MS.NoTrt_B |
| ERV3-1     | 0.79422 | -0.4345 | 0.438 | 0.45 | 1 MS.Trt_vs_MS.NoTrt_B |
| NDFIP2     | 0.7956  | 0.60003 | 0.111 | 0.12 | 1 MS.Trt_vs_MS.NoTrt_B |
| ZNF93      | 0.79578 | 0.93801 | 0.501 | 0.55 | 1 MS.Trt_vs_MS.NoTrt_B |
| SGSM2      | 0.79717 | 1.21824 | 0.187 | 0.2  | 1 MS.Trt_vs_MS.NoTrt_B |
| NUDT7      | 0.79987 | 0.44816 | 0.181 | 0.17 | 1 MS.Trt_vs_MS.NoTrt_B |
| ZNF776     | 0.80066 | 0.43068 | 0.603 | 0.68 | 1 MS.Trt_vs_MS.NoTrt_B |
| RUNX3      | 0.80154 | 0.46727 | 0.12  | 0.13 | 1 MS.Trt_vs_MS.NoTrt_B |
| EIF4G3     | 0.80182 | 1.00525 | 0.179 | 0.19 | 1 MS.Trt_vs_MS.NoTrt_B |
| SULF2      | 0.80192 | 0.31648 | 0.153 | 0.15 | 1 MS.Trt_vs_MS.NoTrt_B |
| LRSAM1     | 0.80274 | 0.409   | 0.115 | 0.12 | 1 MS.Trt_vs_MS.NoTrt_B |
| RP11-544M1 | 0.80319 | -0.4717 | 0.168 | 0.18 | 1 MS.Trt_vs_MS.NoTrt_B |
| PGGT1B     | 0.80323 | 1.11204 | 0.122 | 0.13 | 1 MS.Trt_vs_MS.NoTrt_B |
| SAMD9L     | 0.80524 | 0.90239 | 0.153 | 0.16 | 1 MS.Trt_vs_MS.NoTrt_B |
| TMIGD2     | 0.80531 | 0.92061 | 0.174 | 0.19 | 1 MS.Trt_vs_MS.NoTrt_B |
| PLCB2      | 0.80705 | 0.47363 | 0.218 | 0.22 | 1 MS.Trt_vs_MS.NoTrt_B |
| BOP1       | 0.80929 | -0.5673 | 0.185 | 0.17 | 1 MS.Trt_vs_MS.NoTrt_B |
| WDR60      | 0.80947 | 0.72257 | 0.096 | 0.1  | 1 MS.Trt_vs_MS.NoTrt_B |
| THOC1      | 0.81457 | -0.3462 | 0.187 | 0.2  | 1 MS.Trt_vs_MS.NoTrt_B |
| ID3        | 0.8146  | 0.87616 | 0.166 | 0.16 | 1 MS.Trt_vs_MS.NoTrt_B |
| PTPN9      | 0.81575 | -0.6854 | 0.231 | 0.24 | 1 MS.Trt_vs_MS.NoTrt_B |
| DHRS3      | 0.81602 | 0.65833 | 0.181 | 0.18 | 1 MS.Trt_vs_MS.NoTrt_B |
| MPV17L2    | 0.81649 | 0.74241 | 0.163 | 0.18 | 1 MS.Trt_vs_MS.NoTrt_B |
| CPEB1      | 0.8188  | -0.5637 | 0.118 | 0.12 | 1 MS.Trt_vs_MS.NoTrt_B |
| BAZ1B      | 0.8201  | 0.40749 | 0.161 | 0.17 | 1 MS.Trt_vs_MS.NoTrt_B |
| SNF8       | 0.82076 | 0.3529  | 0.734 | 0.82 | 1 MS.Trt_vs_MS.NoTrt_B |
| PACRGL     | 0.822   | -0.4669 | 0.251 | 0.27 | 1 MS.Trt_vs_MS.NoTrt_B |
| BTBD9      | 0.8227  | 0.39179 | 0.444 | 0.46 | 1 MS.Trt_vs_MS.NoTrt_B |
| ZNF606     | 0.82306 | -0.2697 | 0.688 | 0.68 | 1 MS.Trt_vs_MS.NoTrt_B |
| GTF3C6     | 0.82352 | 0.5623  | 0.12  | 0.13 | 1 MS.Trt_vs_MS.NoTrt_B |

|          |         |         |       |      |                        |
|----------|---------|---------|-------|------|------------------------|
| EVA1C    | 0.82565 | 0.29982 | 0.102 | 0.1  | 1 MS.Trt_vs_MS.NoTrt_B |
| SRPK3    | 0.82722 | 0.50659 | 0.214 | 0.21 | 1 MS.Trt_vs_MS.NoTrt_B |
| ZNF614   | 0.82812 | 0.61337 | 0.19  | 0.18 | 1 MS.Trt_vs_MS.NoTrt_B |
| AHCTF1   | 0.83009 | 1.0825  | 0.153 | 0.15 | 1 MS.Trt_vs_MS.NoTrt_B |
| PPID     | 0.83039 | 0.32355 | 0.388 | 0.37 | 1 MS.Trt_vs_MS.NoTrt_B |
| PPP2R5A  | 0.8311  | 0.9477  | 0.194 | 0.2  | 1 MS.Trt_vs_MS.NoTrt_B |
| DUSP1    | 0.83168 | 0.59833 | 0.139 | 0.15 | 1 MS.Trt_vs_MS.NoTrt_B |
| TSPYL2   | 0.83413 | 0.45799 | 0.168 | 0.16 | 1 MS.Trt_vs_MS.NoTrt_B |
| BCL9L    | 0.83428 | 0.3873  | 0.107 | 0.11 | 1 MS.Trt_vs_MS.NoTrt_B |
| LIN7B    | 0.83693 | 0.44047 | 0.233 | 0.25 | 1 MS.Trt_vs_MS.NoTrt_B |
| LARP1    | 0.83711 | 0.80454 | 0.153 | 0.15 | 1 MS.Trt_vs_MS.NoTrt_B |
| PTPRH    | 0.83946 | -0.4312 | 0.115 | 0.12 | 1 MS.Trt_vs_MS.NoTrt_B |
| ADH1B    | 0.83963 | 0.30836 | 0.227 | 0.25 | 1 MS.Trt_vs_MS.NoTrt_B |
| RAP1B    | 0.83991 | 0.91245 | 0.961 | 0.99 | 1 MS.Trt_vs_MS.NoTrt_B |
| CRKL     | 0.84025 | 0.68405 | 0.503 | 0.57 | 1 MS.Trt_vs_MS.NoTrt_B |
| CYB561   | 0.84046 | 0.62132 | 0.235 | 0.26 | 1 MS.Trt_vs_MS.NoTrt_B |
| CTNNB1   | 0.84206 | 0.63261 | 0.503 | 0.56 | 1 MS.Trt_vs_MS.NoTrt_B |
| FSTL4    | 0.84244 | 0.37204 | 0.131 | 0.13 | 1 MS.Trt_vs_MS.NoTrt_B |
| USP39    | 0.84254 | -0.3031 | 0.416 | 0.39 | 1 MS.Trt_vs_MS.NoTrt_B |
| CXorf36  | 0.84294 | 0.40778 | 0.309 | 0.34 | 1 MS.Trt_vs_MS.NoTrt_B |
| ZNF638   | 0.84394 | 1.01878 | 0.303 | 0.31 | 1 MS.Trt_vs_MS.NoTrt_B |
| CNN3     | 0.84423 | 0.81707 | 0.163 | 0.17 | 1 MS.Trt_vs_MS.NoTrt_B |
| RANBP9   | 0.84519 | 0.9214  | 0.168 | 0.18 | 1 MS.Trt_vs_MS.NoTrt_B |
| TNNI1    | 0.84558 | 0.30265 | 0.366 | 0.4  | 1 MS.Trt_vs_MS.NoTrt_B |
| B3GALNT2 | 0.84815 | 0.48134 | 0.525 | 0.58 | 1 MS.Trt_vs_MS.NoTrt_B |
| RPE      | 0.84959 | 0.68458 | 0.275 | 0.28 | 1 MS.Trt_vs_MS.NoTrt_B |
| ADARB1   | 0.85155 | 1.16536 | 0.176 | 0.17 | 1 MS.Trt_vs_MS.NoTrt_B |
| ZNF669   | 0.85256 | -0.7844 | 0.466 | 0.5  | 1 MS.Trt_vs_MS.NoTrt_B |
| MED16    | 0.85341 | 0.42034 | 0.185 | 0.2  | 1 MS.Trt_vs_MS.NoTrt_B |
| POGLUT1  | 0.85362 | 0.76194 | 0.248 | 0.25 | 1 MS.Trt_vs_MS.NoTrt_B |
| TMEM106A | 0.8543  | 0.73018 | 0.599 | 0.66 | 1 MS.Trt_vs_MS.NoTrt_B |
| FAM21A   | 0.85489 | 0.43654 | 0.19  | 0.2  | 1 MS.Trt_vs_MS.NoTrt_B |
| SPIN1    | 0.85835 | 0.54523 | 0.137 | 0.13 | 1 MS.Trt_vs_MS.NoTrt_B |
| FBXL2    | 0.86067 | 0.47171 | 0.538 | 0.58 | 1 MS.Trt_vs_MS.NoTrt_B |
| CKAP2L   | 0.86117 | 0.35914 | 0.373 | 0.41 | 1 MS.Trt_vs_MS.NoTrt_B |
| TAF2     | 0.86229 | 1.23459 | 0.379 | 0.42 | 1 MS.Trt_vs_MS.NoTrt_B |
| BMPR1B   | 0.86589 | 1.19035 | 0.109 | 0.11 | 1 MS.Trt_vs_MS.NoTrt_B |
| LRRD1    | 0.86637 | 0.31184 | 0.449 | 0.48 | 1 MS.Trt_vs_MS.NoTrt_B |
| AGL      | 0.86702 | 0.70426 | 0.111 | 0.11 | 1 MS.Trt_vs_MS.NoTrt_B |
| HDAC7    | 0.86771 | 0.62827 | 0.2   | 0.21 | 1 MS.Trt_vs_MS.NoTrt_B |

|          |         |         |       |      |                        |
|----------|---------|---------|-------|------|------------------------|
| MT-CYB   | 0.86775 | 0.52801 | 0.68  | 0.76 | 1 MS.Trt_vs_MS.NoTrt_B |
| MFN1     | 0.86847 | 0.59802 | 0.383 | 0.38 | 1 MS.Trt_vs_MS.NoTrt_B |
| CDAN1    | 0.86918 | 0.61836 | 0.375 | 0.41 | 1 MS.Trt_vs_MS.NoTrt_B |
| VNN2     | 0.86941 | 0.53919 | 0.15  | 0.15 | 1 MS.Trt_vs_MS.NoTrt_B |
| ADNP     | 0.87217 | 1.36039 | 0.42  | 0.47 | 1 MS.Trt_vs_MS.NoTrt_B |
| ZNF677   | 0.87233 | -0.2859 | 0.741 | 0.76 | 1 MS.Trt_vs_MS.NoTrt_B |
| SBF1     | 0.87249 | 0.54411 | 0.148 | 0.15 | 1 MS.Trt_vs_MS.NoTrt_B |
| PITPNM1  | 0.87655 | 0.55895 | 0.222 | 0.23 | 1 MS.Trt_vs_MS.NoTrt_B |
| FAM13A   | 0.87886 | 0.39811 | 0.153 | 0.15 | 1 MS.Trt_vs_MS.NoTrt_B |
| FAM76A   | 0.87916 | 0.81886 | 0.728 | 0.73 | 1 MS.Trt_vs_MS.NoTrt_B |
| MORN1    | 0.87927 | 0.25778 | 0.464 | 0.49 | 1 MS.Trt_vs_MS.NoTrt_B |
| MMACHC   | 0.88046 | 0.45714 | 0.789 | 0.82 | 1 MS.Trt_vs_MS.NoTrt_B |
| STT3A    | 0.8814  | 0.50927 | 0.523 | 0.5  | 1 MS.Trt_vs_MS.NoTrt_B |
| INTS2    | 0.88154 | 0.58875 | 0.216 | 0.22 | 1 MS.Trt_vs_MS.NoTrt_B |
| MPP4     | 0.88192 | 0.27462 | 0.447 | 0.49 | 1 MS.Trt_vs_MS.NoTrt_B |
| MCU      | 0.88204 | 0.34193 | 0.196 | 0.2  | 1 MS.Trt_vs_MS.NoTrt_B |
| CD3G     | 0.88388 | 0.59626 | 0.917 | 1    | 1 MS.Trt_vs_MS.NoTrt_B |
| PPIAL4G  | 0.88544 | 0.55883 | 0.558 | 0.58 | 1 MS.Trt_vs_MS.NoTrt_B |
| RPRD1A   | 0.88553 | 0.31238 | 0.144 | 0.15 | 1 MS.Trt_vs_MS.NoTrt_B |
| RAPH1    | 0.88559 | 0.34378 | 0.124 | 0.14 | 1 MS.Trt_vs_MS.NoTrt_B |
| FBXW7    | 0.88685 | 0.86925 | 0.135 | 0.14 | 1 MS.Trt_vs_MS.NoTrt_B |
| ZNF175   | 0.889   | -1.3709 | 0.176 | 0.17 | 1 MS.Trt_vs_MS.NoTrt_B |
| C3orf18  | 0.88912 | 0.25965 | 0.185 | 0.18 | 1 MS.Trt_vs_MS.NoTrt_B |
| NUDT16L1 | 0.88992 | 0.53295 | 0.098 | 0.1  | 1 MS.Trt_vs_MS.NoTrt_B |
| DCUN1D3  | 0.89027 | -0.3827 | 0.129 | 0.12 | 1 MS.Trt_vs_MS.NoTrt_B |
| UBA6     | 0.89094 | 0.56974 | 0.468 | 0.49 | 1 MS.Trt_vs_MS.NoTrt_B |
| SGO2     | 0.89137 | 0.30994 | 0.715 | 0.8  | 1 MS.Trt_vs_MS.NoTrt_B |
| TRPM4    | 0.89307 | 0.33579 | 0.721 | 0.76 | 1 MS.Trt_vs_MS.NoTrt_B |
| ANKRD18A | 0.89366 | 0.36791 | 0.218 | 0.22 | 1 MS.Trt_vs_MS.NoTrt_B |
| RNF31    | 0.8939  | 0.29966 | 0.253 | 0.25 | 1 MS.Trt_vs_MS.NoTrt_B |
| WDR48    | 0.8969  | 0.75316 | 0.129 | 0.14 | 1 MS.Trt_vs_MS.NoTrt_B |
| SPDYE3   | 0.89733 | 0.58628 | 0.542 | 0.55 | 1 MS.Trt_vs_MS.NoTrt_B |
| FAM46C   | 0.89806 | 0.62707 | 0.129 | 0.12 | 1 MS.Trt_vs_MS.NoTrt_B |
| TIMM23   | 0.89855 | 0.82651 | 0.216 | 0.22 | 1 MS.Trt_vs_MS.NoTrt_B |
| ZBTB1    | 0.89878 | 0.74841 | 0.155 | 0.16 | 1 MS.Trt_vs_MS.NoTrt_B |
| RAB42    | 0.90165 | 0.35753 | 0.51  | 0.57 | 1 MS.Trt_vs_MS.NoTrt_B |
| PVR      | 0.90202 | 0.76328 | 0.392 | 0.4  | 1 MS.Trt_vs_MS.NoTrt_B |
| GNB1     | 0.90234 | 0.42833 | 0.259 | 0.25 | 1 MS.Trt_vs_MS.NoTrt_B |
| GFRAL    | 0.90246 | 0.33664 | 0.331 | 0.34 | 1 MS.Trt_vs_MS.NoTrt_B |
| C1orf228 | 0.90335 | 0.39606 | 0.207 | 0.22 | 1 MS.Trt_vs_MS.NoTrt_B |

|            |         |         |       |      |                        |
|------------|---------|---------|-------|------|------------------------|
| KLHDC1     | 0.90382 | 0.45599 | 0.272 | 0.3  | 1 MS.Trt_vs_MS.NoTrt_B |
| AC025335.1 | 0.90423 | 0.39597 | 0.486 | 0.51 | 1 MS.Trt_vs_MS.NoTrt_B |
| ZSCAN25    | 0.90765 | 0.3961  | 0.362 | 0.36 | 1 MS.Trt_vs_MS.NoTrt_B |
| CSF1R      | 0.90927 | 0.3109  | 0.109 | 0.11 | 1 MS.Trt_vs_MS.NoTrt_B |
| ISPD       | 0.91044 | 0.32308 | 0.704 | 0.78 | 1 MS.Trt_vs_MS.NoTrt_B |
| KIF21B     | 0.91222 | 1.06707 | 0.331 | 0.37 | 1 MS.Trt_vs_MS.NoTrt_B |
| ARHGAP44   | 0.91248 | 0.72854 | 0.237 | 0.24 | 1 MS.Trt_vs_MS.NoTrt_B |
| MCM3       | 0.9135  | 0.33974 | 0.133 | 0.13 | 1 MS.Trt_vs_MS.NoTrt_B |
| WTAP       | 0.91408 | 0.73242 | 0.664 | 0.75 | 1 MS.Trt_vs_MS.NoTrt_B |
| ANKRD6     | 0.9143  | -0.5114 | 0.111 | 0.11 | 1 MS.Trt_vs_MS.NoTrt_B |
| PLCXD1     | 0.91583 | 0.4586  | 0.874 | 0.91 | 1 MS.Trt_vs_MS.NoTrt_B |
| ZNF17      | 0.91703 | 0.89923 | 0.235 | 0.24 | 1 MS.Trt_vs_MS.NoTrt_B |
| ATRNL1     | 0.91778 | 0.28232 | 0.294 | 0.33 | 1 MS.Trt_vs_MS.NoTrt_B |
| TMEM107    | 0.91975 | 1.14223 | 0.416 | 0.45 | 1 MS.Trt_vs_MS.NoTrt_B |
| C6orf203   | 0.92038 | 0.78409 | 0.519 | 0.54 | 1 MS.Trt_vs_MS.NoTrt_B |
| SLF1       | 0.92146 | -0.3803 | 0.118 | 0.12 | 1 MS.Trt_vs_MS.NoTrt_B |
| DCAF17     | 0.92186 | 0.28911 | 0.307 | 0.32 | 1 MS.Trt_vs_MS.NoTrt_B |
| SLC48A1    | 0.92558 | 0.70717 | 0.54  | 0.6  | 1 MS.Trt_vs_MS.NoTrt_B |
| TCF4       | 0.92589 | 0.46594 | 0.641 | 0.67 | 1 MS.Trt_vs_MS.NoTrt_B |
| BRAT1      | 0.92678 | 0.41064 | 0.266 | 0.27 | 1 MS.Trt_vs_MS.NoTrt_B |
| NFATC1     | 0.92865 | 0.44499 | 0.146 | 0.15 | 1 MS.Trt_vs_MS.NoTrt_B |
| GSTT1      | 0.92985 | 1.4096  | 0.577 | 0.64 | 1 MS.Trt_vs_MS.NoTrt_B |
| SPINT2     | 0.92987 | -0.341  | 0.425 | 0.44 | 1 MS.Trt_vs_MS.NoTrt_B |
| TERF1      | 0.93091 | 0.40088 | 0.61  | 0.66 | 1 MS.Trt_vs_MS.NoTrt_B |
| CD36       | 0.93095 | 0.32579 | 0.486 | 0.55 | 1 MS.Trt_vs_MS.NoTrt_B |
| ANXA1      | 0.93147 | 0.73757 | 0.131 | 0.13 | 1 MS.Trt_vs_MS.NoTrt_B |
| MAP3K2     | 0.93298 | 0.35175 | 0.166 | 0.16 | 1 MS.Trt_vs_MS.NoTrt_B |
| ZNF212     | 0.93353 | -0.6126 | 0.342 | 0.33 | 1 MS.Trt_vs_MS.NoTrt_B |
| CD40LG     | 0.93434 | 0.66287 | 0.131 | 0.14 | 1 MS.Trt_vs_MS.NoTrt_B |
| PTCHD4     | 0.93554 | 0.25552 | 0.124 | 0.12 | 1 MS.Trt_vs_MS.NoTrt_B |
| SLC1A5     | 0.93666 | -0.5748 | 0.115 | 0.11 | 1 MS.Trt_vs_MS.NoTrt_B |
| RPS7       | 0.9382  | -0.4547 | 0.414 | 0.41 | 1 MS.Trt_vs_MS.NoTrt_B |
| GALC       | 0.93825 | 0.31271 | 0.804 | 0.89 | 1 MS.Trt_vs_MS.NoTrt_B |
| CALM1      | 0.93865 | 0.4046  | 0.734 | 0.88 | 1 MS.Trt_vs_MS.NoTrt_B |
| AAR2       | 0.93932 | 0.66296 | 0.2   | 0.21 | 1 MS.Trt_vs_MS.NoTrt_B |
| BRD9       | 0.94102 | 1.46427 | 0.113 | 0.11 | 1 MS.Trt_vs_MS.NoTrt_B |
| FAM229B    | 0.94519 | 0.26169 | 0.264 | 0.28 | 1 MS.Trt_vs_MS.NoTrt_B |
| POLE2      | 0.94559 | 0.39341 | 0.244 | 0.25 | 1 MS.Trt_vs_MS.NoTrt_B |
| PPP1R16B   | 0.94596 | 0.5428  | 0.19  | 0.19 | 1 MS.Trt_vs_MS.NoTrt_B |
| POLR2M     | 0.94602 | 0.63758 | 0.12  | 0.12 | 1 MS.Trt_vs_MS.NoTrt_B |



|          |         |         |       |      |                        |
|----------|---------|---------|-------|------|------------------------|
| ZNF789   | 0.9465  | 0.34846 | 0.649 | 0.71 | 1 MS.Trt_vs_MS.NoTrt_B |
| C2orf68  | 0.94721 | 0.36547 | 0.767 | 0.77 | 1 MS.Trt_vs_MS.NoTrt_B |
| PPIE     | 0.94775 | 0.86755 | 0.673 | 0.77 | 1 MS.Trt_vs_MS.NoTrt_B |
| GABRP    | 0.94854 | 0.39737 | 0.216 | 0.22 | 1 MS.Trt_vs_MS.NoTrt_B |
| TMTC3    | 0.94949 | 0.42762 | 0.159 | 0.16 | 1 MS.Trt_vs_MS.NoTrt_B |
| PIAS2    | 0.95167 | 0.6867  | 0.678 | 0.7  | 1 MS.Trt_vs_MS.NoTrt_B |
| LANCL1   | 0.95422 | 0.96021 | 0.133 | 0.14 | 1 MS.Trt_vs_MS.NoTrt_B |
| NSUN7    | 0.95508 | 1.47136 | 0.203 | 0.21 | 1 MS.Trt_vs_MS.NoTrt_B |
| DPP3     | 0.9557  | 0.30649 | 0.148 | 0.15 | 1 MS.Trt_vs_MS.NoTrt_B |
| KLHL23   | 0.95733 | 0.4942  | 0.155 | 0.16 | 1 MS.Trt_vs_MS.NoTrt_B |
| MBTD1    | 0.95852 | 0.83425 | 0.342 | 0.35 | 1 MS.Trt_vs_MS.NoTrt_B |
| NDUFAF7  | 0.95935 | -0.6368 | 0.331 | 0.33 | 1 MS.Trt_vs_MS.NoTrt_B |
| ABCC9    | 0.96002 | 0.34578 | 0.858 | 0.95 | 1 MS.Trt_vs_MS.NoTrt_B |
| SLC13A4  | 0.9616  | -0.2952 | 0.27  | 0.28 | 1 MS.Trt_vs_MS.NoTrt_B |
| TOR1A    | 0.9617  | 0.75603 | 0.582 | 0.62 | 1 MS.Trt_vs_MS.NoTrt_B |
| ZEB2     | 0.9632  | 1.12097 | 0.508 | 0.53 | 1 MS.Trt_vs_MS.NoTrt_B |
| STT3B    | 0.96359 | 0.37159 | 0.49  | 0.51 | 1 MS.Trt_vs_MS.NoTrt_B |
| PLOD1    | 0.96402 | 0.56478 | 0.532 | 0.52 | 1 MS.Trt_vs_MS.NoTrt_B |
| MKRN2OS  | 0.96564 | 0.27087 | 0.15  | 0.16 | 1 MS.Trt_vs_MS.NoTrt_B |
| TRAPPC2B | 0.96946 | 0.59439 | 0.259 | 0.26 | 1 MS.Trt_vs_MS.NoTrt_B |
| MAP3K11  | 0.97281 | 0.67585 | 0.599 | 0.64 | 1 MS.Trt_vs_MS.NoTrt_B |
| IRS2     | 0.97356 | 0.48797 | 0.292 | 0.3  | 1 MS.Trt_vs_MS.NoTrt_B |
| ACADM    | 0.97643 | 0.50771 | 0.135 | 0.14 | 1 MS.Trt_vs_MS.NoTrt_B |
| FEZ1     | 0.97789 | 0.26077 | 0.514 | 0.57 | 1 MS.Trt_vs_MS.NoTrt_B |
| THNSL1   | 0.97878 | 1.16527 | 0.098 | 0.1  | 1 MS.Trt_vs_MS.NoTrt_B |
| ZSCAN5A  | 0.9791  | 0.55992 | 0.678 | 0.7  | 1 MS.Trt_vs_MS.NoTrt_B |
| SDCCAG8  | 0.97935 | 0.33427 | 0.678 | 0.74 | 1 MS.Trt_vs_MS.NoTrt_B |
| FAM153C  | 0.98038 | 0.38569 | 0.364 | 0.39 | 1 MS.Trt_vs_MS.NoTrt_B |
| MORF4L2  | 0.98325 | 0.58893 | 0.159 | 0.16 | 1 MS.Trt_vs_MS.NoTrt_B |
| PSD3     | 0.98382 | 0.46323 | 0.259 | 0.27 | 1 MS.Trt_vs_MS.NoTrt_B |
| VDR      | 0.98447 | -0.5908 | 0.261 | 0.25 | 1 MS.Trt_vs_MS.NoTrt_B |
| IL24     | 0.98711 | 0.70315 | 0.135 | 0.14 | 1 MS.Trt_vs_MS.NoTrt_B |
| MFAP5    | 0.98758 | 0.32064 | 0.281 | 0.3  | 1 MS.Trt_vs_MS.NoTrt_B |
| CCL5     | 0.98876 | 0.75721 | 0.804 | 0.88 | 1 MS.Trt_vs_MS.NoTrt_B |
| SRRM2    | 0.98892 | 0.77239 | 0.619 | 0.72 | 1 MS.Trt_vs_MS.NoTrt_B |
| SFMBT2   | 0.98921 | 0.251   | 0.22  | 0.23 | 1 MS.Trt_vs_MS.NoTrt_B |
| C19orf45 | 0.98938 | 0.36038 | 0.381 | 0.42 | 1 MS.Trt_vs_MS.NoTrt_B |
| CHMP1B   | 0.99016 | 0.34829 | 0.688 | 0.78 | 1 MS.Trt_vs_MS.NoTrt_B |
| MFSD6    | 0.99101 | 0.5271  | 0.109 | 0.11 | 1 MS.Trt_vs_MS.NoTrt_B |
| DISC1    | 0.99253 | 0.74828 | 0.42  | 0.44 | 1 MS.Trt_vs_MS.NoTrt_B |

|         |         |         |       |      |                        |
|---------|---------|---------|-------|------|------------------------|
| JMY     | 0.99269 | 0.54546 | 0.211 | 0.22 | 1 MS.Trt_vs_MS.NoTrt_B |
| SLC46A3 | 0.99464 | 1.095   | 0.1   | 0.1  | 1 MS.Trt_vs_MS.NoTrt_B |
| ILVBL   | 0.995   | -0.7125 | 0.209 | 0.21 | 1 MS.Trt_vs_MS.NoTrt_B |
| ZNF626  | 0.99555 | 0.56033 | 0.593 | 0.63 | 1 MS.Trt_vs_MS.NoTrt_B |
| CISH    | 0.99752 | 0.33186 | 0.102 | 0.1  | 1 MS.Trt_vs_MS.NoTrt_B |
| ZNF384  | 0.9987  | 0.3693  | 0.124 | 0.12 | 1 MS.Trt_vs_MS.NoTrt_B |
| RTN4    | 0.99896 | 0.7052  | 0.211 | 0.22 | 1 MS.Trt_vs_MS.NoTrt_B |
| ANKRD49 | 0.99973 | 1.47207 | 0.192 | 0.2  | 1 MS.Trt_vs_MS.NoTrt_B |
| MAPK14  | 1       | 1.32611 | 0.107 | 0.11 | 1 MS.Trt_vs_MS.NoTrt_B |

**Supplementary Table 4. Differentially expressed genes between healthy and MS donors.**

Results of a Wilcoxon rank sum test, performed by Seurat's FindAllMarkers function with default parameter values as described in the text. The comparison column is formatted as "X\_vs\_Y\_T" with X, Y being the two donor groups being compared, and T representing the tissue for whose cells the comparison is performed, B = peripheral blood, F = fat.

**Supplementary Table 5. Donor demographics for MS and healthy donors used for suppression assays.**

|      | Age | Gender | Ethnicity            | Diagnosis & Treatment                       |
|------|-----|--------|----------------------|---------------------------------------------|
| HC   | 21  | M      | White Non-Hispanic   | N/A                                         |
|      | 31  | F      | White Non-Hispanic   | N/A                                         |
|      | 35  | M      | White Non-Hispanic   | N/A                                         |
|      | 22  | M      | White Non-Hispanic   | N/A                                         |
|      | 31  | F      | White Non-Hispanic   | N/A                                         |
|      | 34  | F      | Asian                | N/A                                         |
|      | 28  | F      | White Non-Hispanic   | N/A                                         |
|      | 30  | F      | White Non-Hispanic   | N/A                                         |
| RRMS | 55  | F      | White Non-Hispanic   | New Onset; untreated RRMS                   |
|      | 33  | F      | White Non-Hispanic   | New Onset; untreated RRMS                   |
|      | 32  | F      | Mixed Race, Hispanic | New Onset; untreated RRMS                   |
|      | 44  | M      | White Non-Hispanic   | New Onset; untreated RRMS                   |
|      | 50  | M      | White Non-Hispanic   | New Onset; untreated RRMS                   |
|      | 34  | F      | White, Hispanic      | New Onset; untreated RRMS                   |
|      | 32  | M      | Black Non-Hispanic   | Untreated since 12-2016 (copaxone)          |
|      | 35  | F      | White Non-Hispanic   | Untreated since 10/2017 (1 dose of rituxan) |

**Supplementary Table 5. Donor demographics for MS and healthy donors used for suppression assays.** Age, gender, ethnicity, and disease diagnosis and treatment information for peripheral blood T<sub>regs</sub> from healthy subjects or MS patients used for suppression assays.
